# Supplementary material
Source: PubMed Central journal article supplement (PMC4871124)
Supplement: NIHMS786263-supplement-S2.pdf [file NIHMS786263-supplement-S2.pdf]

| Chromosome | start  | stop   | PPS name    | Score         | Strand |
|------------|--------|--------|-------------|---------------|--------|
| chr1       | 23850  | 23938  | CSAR_peak_  | 8.65,6.03     | +      |
| chr1       | 24002  | 24062  | CSAR_peak_! | 19.36,8.39    | +      |
| chr1       | 24099  | 24232  | CSAR_peak_  | 12.31,9.77,8. | +      |
| chr1       | 24557  | 24654  | CSAR_peak_  | 20.43,20.79,  | +      |
| chr1       | 24926  | 24963  | CSAR_peak_  | 6.21          | +      |
| chr1       | 25041  | 25165  | CSAR_peak_  | 17.51         | +      |
| chr1       | 25270  | 25365  | CSAR_peak_  | 8.95          | +      |
| chr1       | 25655  | 25744  | CSAR_peak_  | 12.13,19.96,  | +      |
| chr1       | 25825  | 25851  | CSAR_peak_  | 10.02,6.02    | +      |
| chr1       | 25944  | 25990  | CSAR_peak_  | 9.58          | +      |
| chr1       | 26166  | 26204  | CSAR_peak_  | 6.21          | +      |
| chr1       | 26308  | 26345  | CSAR_peak_  | 6.21          | +      |
| chr1       | 26961  | 27005  | CSAR_peak_  | 7.27          | +      |
| chr1       | 27198  | 27282  | CSAR_peak_  | 10.83,16.33   | +      |
| chr1       | 27489  | 27534  | CSAR_peak_  | 8.39,6.03     | +      |
| chr1       | 28236  | 28278  | CSAR_peak_  | 8.65          | +      |
| chr1       | 28279  | 28348  | CSAR_peak_! | 8.39          | +      |
| chr1       | 28540  | 28580  | CSAR_peak_  | 7.92          | +      |
| chr1       | 30691  | 30744  | CSAR_peak_  | 7.71,7.29     | +      |
| chr1       | 30929  | 30984  | CSAR_peak_! | 10.95         | +      |
| chr1       | 73092  | 73133  | CSAR_peak_  | 6.21          | +      |
| chr1       | 73704  | 73741  | CSAR_peak_  | 7.58          | +      |
| chr1       | 109613 | 109662 | CSAR_peak_! | 8.39          | +      |
| chr1       | 185989 | 186010 | CSAR_peak_! | 6.21          | +      |
| chr1       | 186340 | 186459 | CSAR_peak_! | 6.95,6.95,6.5 | +      |
| chr1       | 189580 | 189676 | CSAR_peak_! | 8.65          | +      |
| chr1       | 196475 | 196543 | CSAR_peak_  | 7.27          | +      |
| chr1       | 197190 | 197220 | CSAR_peak_  | 6.21          | +      |
| chr1       | 197300 | 197371 | CSAR_peak_  | 6.57          | +      |
| chr1       | 197417 | 197423 | CSAR_peak_  | 7.27          | +      |
| chr1       | 197501 | 197548 | CSAR_peak_  | 6.21          | +      |
| chr1       | 197563 | 197613 | CSAR_peak_  | 13.44         | +      |
| chr1       | 197763 | 197836 | CSAR_peak_  | 7.73          | +      |
| chr1       | 197970 | 198020 | CSAR_peak_  | 7.27          | +      |
| chr1       | 200217 | 200286 | CSAR_peak_  | 10.83         | +      |
| chr1       | 200593 | 200735 | CSAR_peak_  | 6.21,7.27     | +      |
| chr1       | 201268 | 201327 | CSAR_peak_  | 9.58          | +      |
| chr1       | 201538 | 201592 | CSAR_peak_  | 8.39          | +      |
| chr1       | 201634 | 201706 | CSAR_peak_  | 6.57,6.21     | +      |
| chr1       | 204005 | 204053 | CSAR_peak_  | 8.28          | +      |
| chr1       | 264300 | 264350 | CSAR_peak_  | 6.21          | +      |

|      |        |        |            |               |   |
|------|--------|--------|------------|---------------|---|
| chr1 | 268445 | 268567 | CSAR_peak_ | 27.11,16.11   | + |
| chr1 | 268584 | 268750 | CSAR_peak_ | 8.65,9.27,26. | + |
| chr1 | 268976 | 269005 | CSAR_peak_ | 6.22,7.68     | + |
| chr1 | 269043 | 269201 | CSAR_peak_ | 19.36,15.56   | + |
| chr1 | 269331 | 269420 | CSAR_peak_ | 8.49,8.65,19. | + |
| chr1 | 269427 | 269526 | CSAR_peak_ | 5.75,6.87,6.4 | + |
| chr1 | 269895 | 269991 | CSAR_peak_ | 13.44,6.57    | + |
| chr1 | 270052 | 270146 | CSAR_peak_ | 6.21,8.65     | + |
| chr1 | 270211 | 270323 | CSAR_peak_ | 9.58,30.02    | + |
| chr1 | 270355 | 270472 | CSAR_peak_ | 6.21,6.45,11. | + |
| chr1 | 270608 | 270649 | CSAR_peak_ | 7.27          | + |
| chr1 | 271239 | 271314 | CSAR_peak_ | 6.57          | + |
| chr1 | 271357 | 271427 | CSAR_peak_ | 6.57          | + |
| chr1 | 271620 | 271704 | CSAR_peak_ | 17.35,11.66   | + |
| chr1 | 278758 | 278810 | CSAR_peak_ | 8.39          | + |
| chr1 | 279044 | 279089 | CSAR_peak_ | 8.39,6.03     | + |
| chr1 | 279170 | 279238 | CSAR_peak_ | 6.85,8.39     | + |
| chr1 | 279969 | 279999 | CSAR_peak_ | 10.02         | + |
| chr1 | 281309 | 281349 | CSAR_peak_ | 6.44          | + |
| chr1 | 281438 | 281478 | CSAR_peak_ | 9.27          | + |
| chr1 | 327795 | 327867 | CSAR_peak_ | 8.39,6.57     | + |
| chr1 | 328014 | 328057 | CSAR_peak_ | 6.21          | + |
| chr1 | 328219 | 328269 | CSAR_peak_ | 7.27          | + |
| chr1 | 328986 | 329031 | CSAR_peak_ | 6.45,7.92     | + |
| chr1 | 329311 | 329321 | CSAR_peak_ | 5.62          | + |
| chr1 | 329573 | 329619 | CSAR_peak_ | 12.17         | + |
| chr1 | 329658 | 329699 | CSAR_peak_ | 8.65          | + |
| chr1 | 330069 | 330149 | CSAR_peak_ | 9.77,6.21     | + |
| chr1 | 350260 | 350297 | CSAR_peak_ | 6.21          | + |
| chr1 | 377281 | 377303 | CSAR_peak_ | 7.27          | + |
| chr1 | 377466 | 377542 | CSAR_peak_ | 6.78,11.14    | + |
| chr1 | 378298 | 378366 | CSAR_peak_ | 14.76         | + |
| chr1 | 379048 | 379090 | CSAR_peak_ | 8.95,8.28     | + |
| chr1 | 379582 | 379618 | CSAR_peak_ | 6.21          | + |
| chr1 | 380278 | 380376 | CSAR_peak_ | 8.53          | + |
| chr1 | 380602 | 380646 | CSAR_peak_ | 6.03          | + |
| chr1 | 380893 | 380949 | CSAR_peak_ | 6.21          | + |
| chr1 | 380953 | 380999 | CSAR_peak_ | 6.21,8.39     | + |
| chr1 | 381150 | 381156 | CSAR_peak_ | 6.21          | + |
| chr1 | 381294 | 381333 | CSAR_peak_ | 13.48         | + |
| chr1 | 381392 | 381441 | CSAR_peak_ | 15.43         | + |
| chr1 | 381786 | 381818 | CSAR_peak_ | 7.58          | + |

|      |        |        |             |               |   |
|------|--------|--------|-------------|---------------|---|
| chr1 | 381912 | 381954 | CSAR_peak_4 | 9.58          | + |
| chr1 | 381984 | 382041 | CSAR_peak_4 | 7.73          | + |
| chr1 | 382512 | 382566 | CSAR_peak_4 | 8.65,6.57     | + |
| chr1 | 383493 | 383543 | CSAR_peak_4 | 9.03          | + |
| chr1 | 383546 | 383606 | CSAR_peak_4 | 5.62,6.95     | + |
| chr1 | 383608 | 383622 | CSAR_peak_4 | 10.62         | + |
| chr1 | 383674 | 383689 | CSAR_peak_4 | 6.21          | + |
| chr1 | 384694 | 384787 | CSAR_peak_4 | 8.95,10.62    | + |
| chr1 | 385610 | 385624 | CSAR_peak_4 | 13.48,8.95    | + |
| chr1 | 385713 | 385810 | CSAR_peak_4 | 18.95,6.45,9. | + |
| chr1 | 386428 | 386487 | CSAR_peak_4 | 6.21          | + |
| chr1 | 389889 | 389936 | CSAR_peak_4 | 6.21          | + |
| chr1 | 390526 | 390565 | CSAR_peak_4 | 8.92,7.58     | + |
| chr1 | 391050 | 391102 | CSAR_peak_4 | 10.02         | + |
| chr1 | 391508 | 391542 | CSAR_peak_4 | 7.36          | + |
| chr1 | 391665 | 391711 | CSAR_peak_4 | 6.02          | + |
| chr1 | 392021 | 392073 | CSAR_peak_4 | 9.41,6.02     | + |
| chr1 | 392442 | 392496 | CSAR_peak_4 | 6.21,6.21     | + |
| chr1 | 394228 | 394276 | CSAR_peak_4 | 5.62          | + |
| chr1 | 395047 | 395123 | CSAR_peak_4 | 10.02,16.08   | + |
| chr1 | 395186 | 395222 | CSAR_peak_4 | 7.27          | + |
| chr1 | 397056 | 397098 | CSAR_peak_4 | 6.21          | + |
| chr1 | 397877 | 397908 | CSAR_peak_4 | 7.27          | + |
| chr1 | 398292 | 398347 | CSAR_peak_4 | 6.21          | + |
| chr1 | 398905 | 398983 | CSAR_peak_4 | 8.28,8.13     | + |
| chr1 | 399060 | 399127 | CSAR_peak_4 | 6.72,16.88    | + |
| chr1 | 399182 | 399274 | CSAR_peak_4 | 10.02,8.09    | + |
| chr1 | 399554 | 399639 | CSAR_peak_4 | 7.36          | + |
| chr1 | 410293 | 410329 | CSAR_peak_4 | 6.21          | + |
| chr1 | 410339 | 410394 | CSAR_peak_4 | 7.27          | + |
| chr1 | 411185 | 411243 | CSAR_peak_4 | 6.03          | + |
| chr1 | 412917 | 412974 | CSAR_peak_4 | 8.39          | + |
| chr1 | 413202 | 413283 | CSAR_peak_4 | 7.34          | + |
| chr1 | 454005 | 454055 | CSAR_peak_4 | 6.21          | + |
| chr1 | 454719 | 454785 | CSAR_peak_4 | 8.39          | + |
| chr1 | 454788 | 454841 | CSAR_peak_4 | 7.68          | + |
| chr1 | 454974 | 455053 | CSAR_peak_4 | 6.1,9.77      | + |
| chr1 | 455112 | 455148 | CSAR_peak_4 | 6.03          | + |
| chr1 | 455257 | 455315 | CSAR_peak_4 | 5.62,9.58     | + |
| chr1 | 456314 | 456361 | CSAR_peak_4 | 6.57          | + |
| chr1 | 456586 | 456647 | CSAR_peak_4 | 14.88         | + |
| chr1 | 457337 | 457430 | CSAR_peak_4 | 7.27,5.79,14. | + |

|      |        |        |             |                   |   |
|------|--------|--------|-------------|-------------------|---|
| chr1 | 457514 | 457562 | CSAR_peak_1 | 6.95,8.39         | + |
| chr1 | 457579 | 457628 | CSAR_peak_1 | 5.97,15.23,14.28  | + |
| chr1 | 487062 | 487371 | CSAR_peak_1 | 13.02,13.51,13.02 | + |
| chr1 | 487608 | 487676 | CSAR_peak_1 | 10.58,22.58       | + |
| chr1 | 487763 | 487894 | CSAR_peak_1 | 18.61,14.28       | + |
| chr1 | 487994 | 488096 | CSAR_peak_1 | 8.39,8.39         | + |
| chr1 | 488233 | 488338 | CSAR_peak_1 | 9.72,18.61        | + |
| chr1 | 488348 | 488426 | CSAR_peak_1 | 8.65,12.15        | + |
| chr1 | 488643 | 488745 | CSAR_peak_1 | 16.19,8.94,21.19  | + |
| chr1 | 488872 | 488929 | CSAR_peak_1 | 10.12             | + |
| chr1 | 488973 | 489198 | CSAR_peak_1 | 11.96,16.11,16.11 | + |
| chr1 | 489262 | 489375 | CSAR_peak_1 | 9.97,6.85         | + |
| chr1 | 520023 | 520072 | CSAR_peak_1 | 7.27              | + |
| chr1 | 538436 | 538482 | CSAR_peak_1 | 6.21              | + |
| chr1 | 539407 | 539480 | CSAR_peak_1 | 8.39,5.62         | + |
| chr1 | 539714 | 539757 | CSAR_peak_1 | 6.21              | + |
| chr1 | 564670 | 564698 | CSAR_peak_1 | 7.27              | + |
| chr1 | 565433 | 565471 | CSAR_peak_1 | 9.58              | + |
| chr1 | 566340 | 566414 | CSAR_peak_1 | 6.95              | + |
| chr1 | 626785 | 626829 | CSAR_peak_1 | 5.79              | + |
| chr1 | 626931 | 627005 | CSAR_peak_1 | 10.33,6.57        | + |
| chr1 | 627100 | 627107 | CSAR_peak_1 | 7.27              | + |
| chr1 | 627342 | 627383 | CSAR_peak_1 | 7.56,9.34         | + |
| chr1 | 627482 | 627509 | CSAR_peak_1 | 5.75,6.84         | + |
| chr1 | 627514 | 627615 | CSAR_peak_1 | 13.44,8.28        | + |
| chr1 | 628256 | 628288 | CSAR_peak_1 | 6.95              | + |
| chr1 | 628305 | 628376 | CSAR_peak_1 | 13.51,9.76        | + |
| chr1 | 628935 | 629051 | CSAR_peak_1 | 14.92,6.45        | + |
| chr1 | 629230 | 629322 | CSAR_peak_1 | 16.05,6.03,14.28  | + |
| chr1 | 629415 | 629474 | CSAR_peak_1 | 8.95,7.92         | + |
| chr1 | 631470 | 631514 | CSAR_peak_1 | 7.92              | + |
| chr1 | 739846 | 739889 | CSAR_peak_1 | 16.05             | + |
| chr1 | 739912 | 740121 | CSAR_peak_1 | 11.07,38.71,11.07 | + |
| chr1 | 740124 | 740130 | CSAR_peak_1 | 6.1               | + |
| chr1 | 740201 | 740233 | CSAR_peak_1 | 13.02             | + |
| chr1 | 740389 | 740515 | CSAR_peak_1 | 11.39,26.69       | + |
| chr1 | 740620 | 740652 | CSAR_peak_1 | 9.72              | + |
| chr1 | 740694 | 740758 | CSAR_peak_1 | 8.49,6.05,14.28   | + |
| chr1 | 740970 | 741003 | CSAR_peak_1 | 13.92,11.99       | + |
| chr1 | 741008 | 741066 | CSAR_peak_1 | 6.64,6.1,6.96     | + |
| chr1 | 741149 | 741204 | CSAR_peak_1 | 7.36              | + |
| chr1 | 741487 | 741525 | CSAR_peak_1 | 7.27              | + |

|      |        |        |             |                |   |
|------|--------|--------|-------------|----------------|---|
| chr1 | 741552 | 741602 | CSAR_peak_1 | 12.31,18.73    | + |
| chr1 | 741639 | 741757 | CSAR_peak_1 | 6.45,12.6      | + |
| chr1 | 741883 | 741943 | CSAR_peak_1 | 6.03           | + |
| chr1 | 741946 | 742013 | CSAR_peak_1 | 16.33          | + |
| chr1 | 742152 | 742182 | CSAR_peak_1 | 9.77           | + |
| chr1 | 742255 | 742347 | CSAR_peak_1 | 9.27,8.09,22.  | + |
| chr1 | 742473 | 742597 | CSAR_peak_1 | 6.03,10.96,10. | + |
| chr1 | 742700 | 742737 | CSAR_peak_1 | 13.48          | + |
| chr1 | 742768 | 742850 | CSAR_peak_1 | 7.73,14.85     | + |
| chr1 | 742874 | 742972 | CSAR_peak_1 | 6.51,7.61      | + |
| chr1 | 743080 | 743204 | CSAR_peak_1 | 12.74,11.99,   | + |
| chr1 | 743398 | 743462 | CSAR_peak_1 | 7.27           | + |
| chr1 | 743480 | 743547 | CSAR_peak_1 | 6.1,9.03       | + |
| chr1 | 743613 | 743717 | CSAR_peak_1 | 19.36          | + |
| chr1 | 743815 | 743835 | CSAR_peak_1 | 13.48          | + |
| chr1 | 743948 | 743998 | CSAR_peak_1 | 9.27,8.39      | + |
| chr1 | 744769 | 744886 | CSAR_peak_1 | 9.61,7.27      | + |
| chr1 | 745050 | 745114 | CSAR_peak_1 | 7.27,10.95     | + |
| chr1 | 745160 | 745214 | CSAR_peak_1 | 7.27,8.39      | + |
| chr1 | 745747 | 745777 | CSAR_peak_1 | 6.03           | + |
| chr1 | 746196 | 746263 | CSAR_peak_1 | 6.21           | + |
| chr1 | 762022 | 762074 | CSAR_peak_1 | 6.21           | + |
| chr1 | 762305 | 762349 | CSAR_peak_1 | 12.13          | + |
| chr1 | 762560 | 762601 | CSAR_peak_1 | 10.83          | + |
| chr1 | 763055 | 763115 | CSAR_peak_1 | 10.02          | + |
| chr1 | 764494 | 764561 | CSAR_peak_1 | 9.27           | + |
| chr1 | 765173 | 765256 | CSAR_peak_1 | 16.34,6.44     | + |
| chr1 | 765559 | 765595 | CSAR_peak_1 | 6.87           | + |
| chr1 | 765777 | 765849 | CSAR_peak_1 | 6.57,6.21      | + |
| chr1 | 765856 | 765986 | CSAR_peak_1 | 10.95          | + |
| chr1 | 766006 | 766059 | CSAR_peak_1 | 9.77,6.03      | + |
| chr1 | 767242 | 767269 | CSAR_peak_1 | 12.17          | + |
| chr1 | 769981 | 770026 | CSAR_peak_1 | 6.21           | + |
| chr1 | 780746 | 780835 | CSAR_peak_1 | 7.34,6.52,19.  | + |
| chr1 | 783791 | 783831 | CSAR_peak_1 | 8.39           | + |
| chr1 | 788050 | 788081 | CSAR_peak_1 | 7.27           | + |
| chr1 | 788121 | 788240 | CSAR_peak_1 | 11.28,8.95     | + |
| chr1 | 804247 | 804263 | CSAR_peak_1 | 6.95           | + |
| chr1 | 806337 | 806396 | CSAR_peak_1 | 6.95           | + |
| chr1 | 833846 | 833854 | CSAR_peak_1 | 6.95           | + |
| chr1 | 834538 | 834596 | CSAR_peak_1 | 10.95          | + |
| chr1 | 837854 | 837909 | CSAR_peak_1 | 6.21           | + |

|      |         |         |            |               |   |
|------|---------|---------|------------|---------------|---|
| chr1 | 839737  | 839806  | CSAR_peak_ | 10.83         | + |
| chr1 | 840007  | 840049  | CSAR_peak_ | 8.65          | + |
| chr1 | 840196  | 840266  | CSAR_peak_ | 8.39          | + |
| chr1 | 848627  | 848714  | CSAR_peak_ | 10.02,14.76   | + |
| chr1 | 848808  | 848824  | CSAR_peak_ | 7.58          | + |
| chr1 | 848840  | 848871  | CSAR_peak_ | 6.95          | + |
| chr1 | 901464  | 901571  | CSAR_peak_ | 6.21,9.58     | + |
| chr1 | 901861  | 901890  | CSAR_peak_ | 6.21          | + |
| chr1 | 902170  | 902235  | CSAR_peak_ | 8.65,7.27     | + |
| chr1 | 902374  | 902475  | CSAR_peak_ | 7.73,16.33,5. | + |
| chr1 | 902492  | 902545  | CSAR_peak_ | 6.57          | + |
| chr1 | 902824  | 902871  | CSAR_peak_ | 6.21          | + |
| chr1 | 934035  | 934409  | CSAR_peak_ | 7.27,6.57,17. | + |
| chr1 | 934439  | 934552  | CSAR_peak_ | 6.21,8.39,9.2 | + |
| chr1 | 934653  | 934709  | CSAR_peak_ | 6.85          | + |
| chr1 | 934768  | 934828  | CSAR_peak_ | 13            | + |
| chr1 | 935425  | 935482  | CSAR_peak_ | 6.21          | + |
| chr1 | 935752  | 935798  | CSAR_peak_ | 12.13,6.57    | + |
| chr1 | 936000  | 936052  | CSAR_peak_ | 9.58          | + |
| chr1 | 936453  | 936566  | CSAR_peak_ | 12.17         | + |
| chr1 | 992366  | 992417  | CSAR_peak_ | 8.65          | + |
| chr1 | 995344  | 995399  | CSAR_peak_ | 9.58          | + |
| chr1 | 997213  | 997277  | CSAR_peak_ | 13.66         | + |
| chr1 | 999361  | 999412  | CSAR_peak_ | 7.92,8.39     | + |
| chr1 | 999504  | 999544  | CSAR_peak_ | 8.39          | + |
| chr1 | 999556  | 999612  | CSAR_peak_ | 7.27          | + |
| chr1 | 1000272 | 1000283 | CSAR_peak_ | 6.21          | + |
| chr1 | 1002641 | 1002688 | CSAR_peak_ | 8.39          | + |
| chr1 | 1005408 | 1005475 | CSAR_peak_ | 9.58,6.57     | + |
| chr1 | 1006439 | 1006499 | CSAR_peak_ | 13.48         | + |
| chr1 | 1007290 | 1007313 | CSAR_peak_ | 6.21          | + |
| chr1 | 1007967 | 1008016 | CSAR_peak_ | 6.21          | + |
| chr1 | 1008584 | 1008617 | CSAR_peak_ | 9.72,6.75     | + |
| chr1 | 1008632 | 1008738 | CSAR_peak_ | 62.84,109.78  | + |
| chr1 | 1008809 | 1008895 | CSAR_peak_ | 16.62,15.08,  | + |
| chr1 | 1009072 | 1009119 | CSAR_peak_ | 31.97,30.36   | + |
| chr1 | 1009140 | 1009194 | CSAR_peak_ | 111.74,73.48  | + |
| chr1 | 1009236 | 1009357 | CSAR_peak_ | 145.37,6.36,  | + |
| chr1 | 1015463 | 1015515 | CSAR_peak_ | 6.21          | + |
| chr1 | 1051950 | 1052038 | CSAR_peak_ | 6.95,15.23    | + |
| chr1 | 1052171 | 1052262 | CSAR_peak_ | 6.57,7.36     | + |
| chr1 | 1052741 | 1052776 | CSAR_peak_ | 7.34,6.44     | + |

|      |         |         |            |               |   |
|------|---------|---------|------------|---------------|---|
| chr1 | 1053327 | 1053363 | CSAR_peak_ | 9.61,6.85     | + |
| chr1 | 1053365 | 1053423 | CSAR_peak_ | 10.83,8.39    | + |
| chr1 | 1053980 | 1054028 | CSAR_peak_ | 6.64          | + |
| chr1 | 1054637 | 1054667 | CSAR_peak_ | 5.62          | + |
| chr1 | 1054778 | 1054792 | CSAR_peak_ | 8.39          | + |
| chr1 | 1055869 | 1055962 | CSAR_peak_ | 8.65          | + |
| chr1 | 1060816 | 1060865 | CSAR_peak_ | 13.51         | + |
| chr1 | 1111349 | 1111387 | CSAR_peak_ | 6.21          | + |
| chr1 | 1112537 | 1112561 | CSAR_peak_ | 6.21          | + |
| chr1 | 1112713 | 1112774 | CSAR_peak_ | 6.21,6.21     | + |
| chr1 | 1116411 | 1116455 | CSAR_peak_ | 6.21          | + |
| chr1 | 1116604 | 1116642 | CSAR_peak_ | 6.21          | + |
| chr1 | 1116705 | 1116763 | CSAR_peak_ | 6.21          | + |
| chr1 | 1117086 | 1117138 | CSAR_peak_ | 9.58          | + |
| chr1 | 1118305 | 1118379 | CSAR_peak_ | 8.65          | + |
| chr1 | 1125578 | 1125659 | CSAR_peak_ | 7.58          | + |
| chr1 | 1199459 | 1199542 | CSAR_peak_ | 7.92,7.68     | + |
| chr1 | 1200076 | 1200226 | CSAR_peak_ | 12.27,7.27    | + |
| chr1 | 1200348 | 1200389 | CSAR_peak_ | 5.62          | + |
| chr1 | 1200483 | 1200537 | CSAR_peak_ | 10.7          | + |
| chr1 | 1200637 | 1200738 | CSAR_peak_ | 13.48         | + |
| chr1 | 1200818 | 1200884 | CSAR_peak_ | 8.39,6.21,6.0 | + |
| chr1 | 1201051 | 1201227 | CSAR_peak_ | 7.27,9.61     | + |
| chr1 | 1202400 | 1202472 | CSAR_peak_ | 9.58,7.27     | + |
| chr1 | 1202714 | 1202790 | CSAR_peak_ | 8.65,6.21     | + |
| chr1 | 1202802 | 1202891 | CSAR_peak_ | 6.54,11.66    | + |
| chr1 | 1202958 | 1203024 | CSAR_peak_ | 6.21,14       | + |
| chr1 | 1203050 | 1203109 | CSAR_peak_ | 8.95          | + |
| chr1 | 1203392 | 1203421 | CSAR_peak_ | 6.57          | + |
| chr1 | 1203495 | 1203591 | CSAR_peak_ | 7.92,7.58,7.2 | + |
| chr1 | 1203592 | 1203615 | CSAR_peak_ | 7.58          | + |
| chr1 | 1203707 | 1203761 | CSAR_peak_ | 6.21          | + |
| chr1 | 1203844 | 1203906 | CSAR_peak_ | 9.76,11.14    | + |
| chr1 | 1203956 | 1204016 | CSAR_peak_ | 13.51,10.95,  | + |
| chr1 | 1204187 | 1204263 | CSAR_peak_ | 13.29,6.52    | + |
| chr1 | 1204477 | 1204545 | CSAR_peak_ | 13,8.65,6.03  | + |
| chr1 | 1204606 | 1204705 | CSAR_peak_ | 10.57,7.11,8. | + |
| chr1 | 1205101 | 1205158 | CSAR_peak_ | 8.39          | + |
| chr1 | 1205171 | 1205277 | CSAR_peak_ | 20.18,7.58    | + |
| chr1 | 1205386 | 1205457 | CSAR_peak_ | 9.58          | + |
| chr1 | 1216722 | 1216755 | CSAR_peak_ | 6.95          | + |
| chr1 | 1216790 | 1216867 | CSAR_peak_ | 7.94          | + |

|      |         |         |             |               |   |
|------|---------|---------|-------------|---------------|---|
| chr1 | 1216920 | 1217065 | CSAR_peak_! | 131.34,83.54  | + |
| chr1 | 1314489 | 1314534 | CSAR_peak_! | 7.27          | + |
| chr1 | 1351575 | 1351619 | CSAR_peak_! | 5.62          | + |
| chr1 | 1505951 | 1505994 | CSAR_peak_! | 7.27,9.77     | + |
| chr1 | 1579347 | 1579400 | CSAR_peak_! | 10.83         | + |
| chr1 | 1716330 | 1716383 | CSAR_peak_! | 6.21          | + |
| chr1 | 1733575 | 1733617 | CSAR_peak_! | 7.27          | + |
| chr1 | 1733960 | 1734006 | CSAR_peak_! | 7.68          | + |
| chr1 | 1745022 | 1745307 | CSAR_peak_! | 9.27,8.38,7.2 | + |
| chr1 | 1745635 | 1745672 | CSAR_peak_! | 6.03          | + |
| chr1 | 1746185 | 1746244 | CSAR_peak_! | 12.13,13.48   | + |
| chr1 | 1746356 | 1746431 | CSAR_peak_! | 6.57          | + |
| chr1 | 1746470 | 1746503 | CSAR_peak_! | 8.39          | + |
| chr1 | 1746849 | 1746890 | CSAR_peak_! | 15.03,13.3    | + |
| chr1 | 1747036 | 1747062 | CSAR_peak_! | 6.21          | + |
| chr1 | 1747193 | 1747256 | CSAR_peak_! | 17.82,7.34,7. | + |
| chr1 | 1747814 | 1747870 | CSAR_peak_! | 6.57,6.21     | + |
| chr1 | 1747890 | 1748031 | CSAR_peak_! | 8.95,17.51    | + |
| chr1 | 1748550 | 1748579 | CSAR_peak_! | 7.27          | + |
| chr1 | 1748733 | 1748777 | CSAR_peak_! | 12.13,7.27    | + |
| chr1 | 1749028 | 1749139 | CSAR_peak_! | 8.65,23.82    | + |
| chr1 | 1749215 | 1749286 | CSAR_peak_! | 8.39          | + |
| chr1 | 1750362 | 1750408 | CSAR_peak_! | 6.21          | + |
| chr1 | 1750918 | 1750952 | CSAR_peak_! | 9.77          | + |
| chr1 | 1750964 | 1750976 | CSAR_peak_! | 6.57          | + |
| chr1 | 1751187 | 1751276 | CSAR_peak_! | 10.83,8.53,8. | + |
| chr1 | 1754951 | 1755075 | CSAR_peak_! | 9.27,9.77     | + |
| chr1 | 1755437 | 1755483 | CSAR_peak_! | 10.02         | + |
| chr1 | 1756123 | 1756164 | CSAR_peak_! | 7.27          | + |
| chr1 | 1756566 | 1756634 | CSAR_peak_! | 13.44         | + |
| chr1 | 1758523 | 1758585 | CSAR_peak_! | 13.48         | + |
| chr1 | 1759621 | 1759665 | CSAR_peak_! | 6.21          | + |
| chr1 | 1760191 | 1760248 | CSAR_peak_! | 6.03,6.57     | + |
| chr1 | 1760369 | 1760413 | CSAR_peak_! | 7.27          | + |
| chr1 | 1779645 | 1779730 | CSAR_peak_! | 10.83,16.33   | + |
| chr1 | 1780588 | 1780632 | CSAR_peak_! | 6.72,5.92     | + |
| chr1 | 1782455 | 1782478 | CSAR_peak_! | 6.45          | + |
| chr1 | 1782514 | 1782545 | CSAR_peak_! | 6.85          | + |
| chr1 | 1782666 | 1782740 | CSAR_peak_! | 7.92,6.1      | + |
| chr1 | 1782821 | 1782850 | CSAR_peak_! | 6.95          | + |
| chr1 | 1787451 | 1787510 | CSAR_peak_! | 6.03          | + |
| chr1 | 1788978 | 1789020 | CSAR_peak_! | 6.21          | + |



|      |         |         |            |               |   |
|------|---------|---------|------------|---------------|---|
| chr1 | 1908414 | 1908449 | CSAR_peak_ | 9.58,7.58     | + |
| chr1 | 1908705 | 1908747 | CSAR_peak_ | 7.27          | + |
| chr1 | 1909034 | 1909094 | CSAR_peak_ | 8.39          | + |
| chr1 | 1909366 | 1909434 | CSAR_peak_ | 9.58          | + |
| chr1 | 1909981 | 1910034 | CSAR_peak_ | 9.58          | + |
| chr1 | 1910791 | 1910834 | CSAR_peak_ | 6.21          | + |
| chr1 | 1912156 | 1912198 | CSAR_peak_ | 8.39          | + |
| chr1 | 1912441 | 1912523 | CSAR_peak_ | 9.58          | + |
| chr1 | 1912629 | 1912642 | CSAR_peak_ | 8.39,13.48    | + |
| chr1 | 1949351 | 1949397 | CSAR_peak_ | 6.21          | + |
| chr1 | 1949719 | 1949810 | CSAR_peak_ | 7.27,8.28,6.2 | + |
| chr1 | 1950316 | 1950382 | CSAR_peak_ | 6.21,7.27     | + |
| chr1 | 1955042 | 1955106 | CSAR_peak_ | 8.39,8.39     | + |
| chr1 | 1955273 | 1955346 | CSAR_peak_ | 18.1,10.83,2  | + |
| chr1 | 1955347 | 1955381 | CSAR_peak_ | 7.47          | + |
| chr1 | 1955406 | 1955559 | CSAR_peak_ | 8.61,22.56,9. | + |
| chr1 | 1955622 | 1955675 | CSAR_peak_ | 8.52          | + |
| chr1 | 1955704 | 1955811 | CSAR_peak_ | 25.21,37.04   | + |
| chr1 | 1956196 | 1956262 | CSAR_peak_ | 12.21,8.94    | + |
| chr1 | 1956300 | 1956350 | CSAR_peak_ | 12.66,7.78    | + |
| chr1 | 1956396 | 1956632 | CSAR_peak_ | 22.58,11.63,  | + |
| chr1 | 1956781 | 1956959 | CSAR_peak_ | 19.36,19.36   | + |
| chr1 | 1956964 | 1957106 | CSAR_peak_ | 6.21,9.72,12. | + |
| chr1 | 1957111 | 1957198 | CSAR_peak_ | 14.88,8.5     | + |
| chr1 | 1957234 | 1957299 | CSAR_peak_ | 6.1,10.92     | + |
| chr1 | 1957321 | 1957379 | CSAR_peak_ | 7.68,6.28     | + |
| chr1 | 1957452 | 1957524 | CSAR_peak_ | 10.77,6.57    | + |
| chr1 | 1957551 | 1957653 | CSAR_peak_ | 14.63         | + |
| chr1 | 1957693 | 1957868 | CSAR_peak_ | 8.92,27.77,1  | + |
| chr1 | 1957876 | 1958108 | CSAR_peak_ | 18.46,6.95,1  | + |
| chr1 | 1958115 | 1958177 | CSAR_peak_ | 30.53,19.01   | + |
| chr1 | 1958225 | 1958310 | CSAR_peak_ | 7.58,13.44,9. | + |
| chr1 | 1958385 | 1958442 | CSAR_peak_ | 8.95          | + |
| chr1 | 1958610 | 1958710 | CSAR_peak_ | 9.58,10.31    | + |
| chr1 | 1958925 | 1959039 | CSAR_peak_ | 9.58,7.27,6.0 | + |
| chr1 | 1959078 | 1959222 | CSAR_peak_ | 8.28,14.76,1  | + |
| chr1 | 1959230 | 1959304 | CSAR_peak_ | 9.77          | + |
| chr1 | 1959309 | 1959334 | CSAR_peak_ | 9.77          | + |
| chr1 | 1959335 | 1959398 | CSAR_peak_ | 6.57          | + |
| chr1 | 1959419 | 1959597 | CSAR_peak_ | 13.44,6.37,1  | + |
| chr1 | 2025868 | 2025901 | CSAR_peak_ | 6.85          | + |
| chr1 | 2026086 | 2026142 | CSAR_peak_ | 10.02         | + |

|      |         |         |            |              |   |
|------|---------|---------|------------|--------------|---|
| chr1 | 2026843 | 2026928 | CSAR_peak_ | 18.73,6.78   | + |
| chr1 | 2029329 | 2029355 | CSAR_peak_ | 6.21         | + |
| chr1 | 2031082 | 2031122 | CSAR_peak_ | 8.39         | + |
| chr1 | 2032230 | 2032293 | CSAR_peak_ | 7.27         | + |
| chr1 | 2032390 | 2032421 | CSAR_peak_ | 6.21         | + |
| chr1 | 2032508 | 2032588 | CSAR_peak_ | 6.21         | + |
| chr1 | 2032644 | 2032690 | CSAR_peak_ | 6.21         | + |
| chr1 | 2032859 | 2032910 | CSAR_peak_ | 6.85,6.21    | + |
| chr1 | 2033349 | 2033418 | CSAR_peak_ | 16,9.61,10.0 | + |
| chr1 | 2033517 | 2033555 | CSAR_peak_ | 8.65         | + |
| chr1 | 2033614 | 2033650 | CSAR_peak_ | 6.21         | + |
| chr1 | 2034254 | 2034328 | CSAR_peak_ | 8.39         | + |
| chr1 | 2034451 | 2034500 | CSAR_peak_ | 7.27         | + |
| chr1 | 2035421 | 2035489 | CSAR_peak_ | 11.38        | + |
| chr1 | 2036932 | 2037044 | CSAR_peak_ | 6.21         | + |
| chr1 | 2037117 | 2037176 | CSAR_peak_ | 8.39         | + |
| chr1 | 2042446 | 2042483 | CSAR_peak_ | 5.62         | + |
| chr1 | 2045561 | 2045700 | CSAR_peak_ | 10.95,6.21   | + |
| chr1 | 2046275 | 2046322 | CSAR_peak_ | 10.83        | + |
| chr1 | 2048139 | 2048187 | CSAR_peak_ | 7.34         | + |
| chr1 | 2048394 | 2048438 | CSAR_peak_ | 6.03         | + |
| chr1 | 2048576 | 2048619 | CSAR_peak_ | 6.03         | + |
| chr1 | 2048696 | 2048738 | CSAR_peak_ | 7.27         | + |
| chr1 | 2048894 | 2048973 | CSAR_peak_ | 10.83,13.51  | + |
| chr1 | 2049010 | 2049024 | CSAR_peak_ | 7.73         | + |
| chr1 | 2049718 | 2049808 | CSAR_peak_ | 14.88        | + |
| chr1 | 2050145 | 2050197 | CSAR_peak_ | 6.21         | + |
| chr1 | 2050301 | 2050346 | CSAR_peak_ | 7.27,6.21    | + |
| chr1 | 2050943 | 2050987 | CSAR_peak_ | 8.39         | + |
| chr1 | 2238921 | 2239046 | CSAR_peak_ | 9.58         | + |
| chr1 | 2249853 | 2249926 | CSAR_peak_ | 9.58,6.21    | + |
| chr1 | 2251775 | 2251833 | CSAR_peak_ | 10.83        | + |
| chr1 | 2278587 | 2278633 | CSAR_peak_ | 8.65         | + |
| chr1 | 2279067 | 2279217 | CSAR_peak_ | 16.33        | + |
| chr1 | 2279310 | 2279340 | CSAR_peak_ | 7.58         | + |
| chr1 | 2279948 | 2279994 | CSAR_peak_ | 8.28         | + |
| chr1 | 2280027 | 2280061 | CSAR_peak_ | 7.27         | + |
| chr1 | 2293786 | 2293837 | CSAR_peak_ | 7.27         | + |
| chr1 | 2293953 | 2294071 | CSAR_peak_ | 10.02,8.95   | + |
| chr1 | 2306172 | 2306222 | CSAR_peak_ | 6.21         | + |
| chr1 | 2307057 | 2307104 | CSAR_peak_ | 5.62         | + |
| chr1 | 2341596 | 2341657 | CSAR_peak_ | 8.95,6.57    | + |

|      |         |         |            |                  |   |
|------|---------|---------|------------|------------------|---|
| chr1 | 2437481 | 2437556 | CSAR_peak_ | 12.13,8.39       | + |
| chr1 | 2438022 | 2438119 | CSAR_peak_ | 11.41,8          | + |
| chr1 | 2438125 | 2438274 | CSAR_peak_ | 9.77,21.53       | + |
| chr1 | 2438660 | 2438708 | CSAR_peak_ | 9.77             | + |
| chr1 | 2438723 | 2438787 | CSAR_peak_ | 7.27             | + |
| chr1 | 2438891 | 2438950 | CSAR_peak_ | 7.58,7.2         | + |
| chr1 | 2438989 | 2439015 | CSAR_peak_ | 9.58             | + |
| chr1 | 2439029 | 2439113 | CSAR_peak_ | 6.57,12.74,6.    | + |
| chr1 | 2439118 | 2439188 | CSAR_peak_ | 6.21,8.65        | + |
| chr1 | 2439222 | 2439337 | CSAR_peak_ | 8.9,8.28         | + |
| chr1 | 2439544 | 2439576 | CSAR_peak_ | 6.95             | + |
| chr1 | 2447345 | 2447352 | CSAR_peak_ | 7.27             | + |
| chr1 | 2450776 | 2450826 | CSAR_peak_ | 8.95             | + |
| chr1 | 2451124 | 2451186 | CSAR_peak_ | 12.13,6.21       | + |
| chr1 | 2451758 | 2451866 | CSAR_peak_ | 9.58,8.39        | + |
| chr1 | 2452044 | 2452092 | CSAR_peak_ | 7.92             | + |
| chr1 | 2452807 | 2452845 | CSAR_peak_ | 8.39             | + |
| chr1 | 2454023 | 2454073 | CSAR_peak_ | 6.21             | + |
| chr1 | 2480663 | 2480729 | CSAR_peak_ | 8.39             | + |
| chr1 | 2481215 | 2481256 | CSAR_peak_ | 6.95             | + |
| chr1 | 2481585 | 2481647 | CSAR_peak_ | 8.95,7.92        | + |
| chr1 | 2482673 | 2482751 | CSAR_peak_ | 12.17            | + |
| chr1 | 2537320 | 2537397 | CSAR_peak_ | 6.21,6.03        | + |
| chr1 | 2567631 | 2567665 | CSAR_peak_ | 6.21             | + |
| chr1 | 2567677 | 2567746 | CSAR_peak_ | 6.03             | + |
| chr1 | 2570912 | 2570944 | CSAR_peak_ | 6.21             | + |
| chr1 | 2573020 | 2573070 | CSAR_peak_ | 8.95             | + |
| chr1 | 2619474 | 2619531 | CSAR_peak_ | 8.39             | + |
| chr1 | 2649958 | 2650014 | CSAR_peak_ | 8.39             | + |
| chr1 | 2651172 | 2651211 | CSAR_peak_ | 6.21             | + |
| chr1 | 2651538 | 2651590 | CSAR_peak_ | 11.38,13.51,6.21 | + |
| chr1 | 2651689 | 2651750 | CSAR_peak_ | 8.95             | + |
| chr1 | 2652540 | 2652550 | CSAR_peak_ | 7.73             | + |
| chr1 | 2652693 | 2652732 | CSAR_peak_ | 6.95             | + |
| chr1 | 2654026 | 2654057 | CSAR_peak_ | 10.02            | + |
| chr1 | 2655255 | 2655325 | CSAR_peak_ | 13.48,6.21       | + |
| chr1 | 2655364 | 2655413 | CSAR_peak_ | 10.02,7.73       | + |
| chr1 | 2656338 | 2656389 | CSAR_peak_ | 8.13             | + |
| chr1 | 2656478 | 2656519 | CSAR_peak_ | 10.02            | + |
| chr1 | 2696998 | 2697045 | CSAR_peak_ | 16.33,14.88      | + |
| chr1 | 2697083 | 2697124 | CSAR_peak_ | 6.03             | + |
| chr1 | 2697140 | 2697194 | CSAR_peak_ | 6.85,9.58        | + |

|      |         |         |            |               |   |
|------|---------|---------|------------|---------------|---|
| chr1 | 2697283 | 2697341 | CSAR_peak_ | 10.95,7.27    | + |
| chr1 | 2697708 | 2697757 | CSAR_peak_ | 10.02         | + |
| chr1 | 2697872 | 2697996 | CSAR_peak_ | 6.21,9.77,9.5 | + |
| chr1 | 2698111 | 2698204 | CSAR_peak_ | 6.87,8.5,10.6 | + |
| chr1 | 2698669 | 2698723 | CSAR_peak_ | 8.65,6.21     | + |
| chr1 | 2699570 | 2699622 | CSAR_peak_ | 11.66,9.97    | + |
| chr1 | 2699813 | 2699834 | CSAR_peak_ | 7.27          | + |
| chr1 | 2699870 | 2699921 | CSAR_peak_ | 8.39,6.57     | + |
| chr1 | 2699934 | 2699999 | CSAR_peak_ | 8.39          | + |
| chr1 | 2700303 | 2700414 | CSAR_peak_ | 14.88,10.83   | + |
| chr1 | 2700518 | 2700639 | CSAR_peak_ | 7.27          | + |
| chr1 | 2701155 | 2701238 | CSAR_peak_ | 11.38,8.39    | + |
| chr1 | 2705052 | 2705092 | CSAR_peak_ | 8.39          | + |
| chr1 | 2707375 | 2707421 | CSAR_peak_ | 9.77          | + |
| chr1 | 2708174 | 2708280 | CSAR_peak_ | 7.92          | + |
| chr1 | 2709011 | 2709108 | CSAR_peak_ | 6.21,7.34     | + |
| chr1 | 2709181 | 2709282 | CSAR_peak_ | 7.34,8.39     | + |
| chr1 | 2713488 | 2713586 | CSAR_peak_ | 7.58,6.21,6.0 | + |
| chr1 | 2713680 | 2713734 | CSAR_peak_ | 11.66         | + |
| chr1 | 2713743 | 2713871 | CSAR_peak_ | 9.58,9.77,11. | + |
| chr1 | 2728692 | 2728750 | CSAR_peak_ | 8.65          | + |
| chr1 | 2732099 | 2732160 | CSAR_peak_ | 16.33         | + |
| chr1 | 2732545 | 2732606 | CSAR_peak_ | 13.44,8.65    | + |
| chr1 | 2732805 | 2732862 | CSAR_peak_ | 6.21          | + |
| chr1 | 2737974 | 2738030 | CSAR_peak_ | 6.45          | + |
| chr1 | 2738179 | 2738239 | CSAR_peak_ | 9.58,5.62     | + |
| chr1 | 2738593 | 2738658 | CSAR_peak_ | 9.58          | + |
| chr1 | 2738793 | 2738853 | CSAR_peak_ | 7.26,8.95     | + |
| chr1 | 2740391 | 2740427 | CSAR_peak_ | 24.21         | + |
| chr1 | 2740828 | 2740835 | CSAR_peak_ | 10.83         | + |
| chr1 | 2742767 | 2742831 | CSAR_peak_ | 8.39          | + |
| chr1 | 2743317 | 2743377 | CSAR_peak_ | 8.39          | + |
| chr1 | 2752190 | 2752278 | CSAR_peak_ | 6.21          | + |
| chr1 | 2752755 | 2752810 | CSAR_peak_ | 8.39          | + |
| chr1 | 2753150 | 2753206 | CSAR_peak_ | 7.27          | + |
| chr1 | 2762873 | 2762917 | CSAR_peak_ | 6.21          | + |
| chr1 | 2764636 | 2764690 | CSAR_peak_ | 7.27          | + |
| chr1 | 2774450 | 2774500 | CSAR_peak_ | 9.77,8.95,17. | + |
| chr1 | 2774851 | 2774886 | CSAR_peak_ | 6.44,8.39     | + |
| chr1 | 2775150 | 2775192 | CSAR_peak_ | 6.21          | + |
| chr1 | 2775221 | 2775274 | CSAR_peak_ | 7.27,10.95    | + |
| chr1 | 2775583 | 2775623 | CSAR_peak_ | 8.09          | + |

|      |         |         |            |               |   |
|------|---------|---------|------------|---------------|---|
| chr1 | 2775708 | 2775717 | CSAR_peak_ | 8.39          | + |
| chr1 | 2776729 | 2776814 | CSAR_peak_ | 14.88,6.44    | + |
| chr1 | 2777033 | 2777081 | CSAR_peak_ | 6.21          | + |
| chr1 | 2777583 | 2777612 | CSAR_peak_ | 6.03          | + |
| chr1 | 2777613 | 2777666 | CSAR_peak_ | 7.92,7.34     | + |
| chr1 | 2777873 | 2777907 | CSAR_peak_ | 7.58          | + |
| chr1 | 2778787 | 2778818 | CSAR_peak_ | 6.21          | + |
| chr1 | 2778820 | 2778930 | CSAR_peak_ | 10.83,11.66,  | + |
| chr1 | 2827170 | 2827192 | CSAR_peak_ | 8.65          | + |
| chr1 | 2827680 | 2827698 | CSAR_peak_ | 9.77          | + |
| chr1 | 2827716 | 2827758 | CSAR_peak_ | 10.31         | + |
| chr1 | 2828106 | 2828202 | CSAR_peak_ | 6.87,7.36     | + |
| chr1 | 2828449 | 2828499 | CSAR_peak_ | 5.62          | + |
| chr1 | 2828532 | 2828582 | CSAR_peak_ | 11.38         | + |
| chr1 | 2828753 | 2828807 | CSAR_peak_ | 9.77          | + |
| chr1 | 2829031 | 2829037 | CSAR_peak_ | 6.21          | + |
| chr1 | 2848497 | 2848506 | CSAR_peak_ | 7.27          | + |
| chr1 | 2848669 | 2848710 | CSAR_peak_ | 6.21,10.83    | + |
| chr1 | 2848737 | 2848805 | CSAR_peak_ | 16.11,6.44    | + |
| chr1 | 2848983 | 2849007 | CSAR_peak_ | 6.51          | + |
| chr1 | 2849066 | 2849121 | CSAR_peak_ | 7.27          | + |
| chr1 | 2849264 | 2849302 | CSAR_peak_ | 13.85         | + |
| chr1 | 2849306 | 2849354 | CSAR_peak_ | 6.85,6.57     | + |
| chr1 | 2849460 | 2849521 | CSAR_peak_ | 8.39          | + |
| chr1 | 2849805 | 2849858 | CSAR_peak_ | 7.27          | + |
| chr1 | 2849929 | 2850045 | CSAR_peak_ | 9.58,16.1,10. | + |
| chr1 | 2850079 | 2850173 | CSAR_peak_ | 6.94,16.33    | + |
| chr1 | 2850441 | 2850477 | CSAR_peak_ | 12.13         | + |
| chr1 | 2850707 | 2850723 | CSAR_peak_ | 6.21,7.27     | + |
| chr1 | 2850815 | 2850878 | CSAR_peak_ | 11.28,6.95    | + |
| chr1 | 2851149 | 2851189 | CSAR_peak_ | 6.44          | + |
| chr1 | 2851764 | 2851805 | CSAR_peak_ | 7.27,8.39     | + |
| chr1 | 2851883 | 2851957 | CSAR_peak_ | 14.88,8.95    | + |
| chr1 | 2852558 | 2852604 | CSAR_peak_ | 6.03,13.48,9. | + |
| chr1 | 2852706 | 2852779 | CSAR_peak_ | 6.57,14.76    | + |
| chr1 | 2853990 | 2854036 | CSAR_peak_ | 10.02,5.62    | + |
| chr1 | 2854675 | 2854710 | CSAR_peak_ | 6.21          | + |
| chr1 | 2854961 | 2855022 | CSAR_peak_ | 9.58          | + |
| chr1 | 2855499 | 2855534 | CSAR_peak_ | 8.39          | + |
| chr1 | 2856789 | 2856851 | CSAR_peak_ | 29.4          | + |
| chr1 | 2856941 | 2856949 | CSAR_peak_ | 5.95          | + |
| chr1 | 2856951 | 2857007 | CSAR_peak_ | 9.72,17.57    | + |

|      |         |         |            |               |   |
|------|---------|---------|------------|---------------|---|
| chr1 | 2857758 | 2857817 | CSAR_peak_ | 10.83         | + |
| chr1 | 2857965 | 2857985 | CSAR_peak_ | 8.39          | + |
| chr1 | 2859006 | 2859037 | CSAR_peak_ | 6.1           | + |
| chr1 | 2859286 | 2859312 | CSAR_peak_ | 8.65          | + |
| chr1 | 2859334 | 2859394 | CSAR_peak_ | 7.27          | + |
| chr1 | 2867423 | 2867483 | CSAR_peak_ | 6.52,12.6     | + |
| chr1 | 2867884 | 2867940 | CSAR_peak_ | 7.61          | + |
| chr1 | 2868057 | 2868100 | CSAR_peak_ | 6.45          | + |
| chr1 | 2868202 | 2868304 | CSAR_peak_ | 11.14,19.98   | + |
| chr1 | 2868383 | 2868405 | CSAR_peak_ | 6.21          | + |
| chr1 | 2868420 | 2868480 | CSAR_peak_ | 7.27,10.95    | + |
| chr1 | 2868522 | 2868562 | CSAR_peak_ | 5.62          | + |
| chr1 | 2868569 | 2868608 | CSAR_peak_ | 7.27          | + |
| chr1 | 2868739 | 2868761 | CSAR_peak_ | 6.87          | + |
| chr1 | 2868775 | 2868809 | CSAR_peak_ | 6.44,6.45     | + |
| chr1 | 2868889 | 2868985 | CSAR_peak_ | 6.37,11.96    | + |
| chr1 | 2869013 | 2869091 | CSAR_peak_ | 17.51,15,6.2  | + |
| chr1 | 2869093 | 2869163 | CSAR_peak_ | 7.73,14.34    | + |
| chr1 | 2869378 | 2869450 | CSAR_peak_ | 7.7,6.85,9.58 | + |
| chr1 | 2869695 | 2869750 | CSAR_peak_ | 7.27          | + |
| chr1 | 2870014 | 2870123 | CSAR_peak_ | 7.58          | + |
| chr1 | 2873652 | 2873685 | CSAR_peak_ | 6.45          | + |
| chr1 | 2873739 | 2873792 | CSAR_peak_ | 8.95          | + |
| chr1 | 2873889 | 2873958 | CSAR_peak_ | 7.73,6.21     | + |
| chr1 | 2874150 | 2874213 | CSAR_peak_ | 7.2,6.97      | + |
| chr1 | 2874325 | 2874376 | CSAR_peak_ | 25.32         | + |
| chr1 | 2874469 | 2874548 | CSAR_peak_ | 7.69,5.77     | + |
| chr1 | 2874627 | 2874720 | CSAR_peak_ | 15.2,6.51,21. | + |
| chr1 | 2874816 | 2874892 | CSAR_peak_ | 6.45,6.95,14. | + |
| chr1 | 2874935 | 2875038 | CSAR_peak_ | 12.31,29.2,7. | + |
| chr1 | 2875170 | 2875233 | CSAR_peak_ | 8.65,6.64     | + |
| chr1 | 2875256 | 2875303 | CSAR_peak_ | 16.08         | + |
| chr1 | 2875412 | 2875519 | CSAR_peak_ | 21.24,7.92,1. | + |
| chr1 | 2875635 | 2875709 | CSAR_peak_ | 7.7           | + |
| chr1 | 2875961 | 2876024 | CSAR_peak_ | 7.36,8.44     | + |
| chr1 | 2876155 | 2876181 | CSAR_peak_ | 8.28          | + |
| chr1 | 2876320 | 2876440 | CSAR_peak_ | 10.99,9.58    | + |
| chr1 | 2876639 | 2876679 | CSAR_peak_ | 8.3           | + |
| chr1 | 2876689 | 2876754 | CSAR_peak_ | 12.54,7.26    | + |
| chr1 | 2876855 | 2876873 | CSAR_peak_ | 9.79,8.13     | + |
| chr1 | 2877009 | 2877112 | CSAR_peak_ | 7.78,16.33,1. | + |
| chr1 | 2877866 | 2877926 | CSAR_peak_ | 10.83         | + |

|      |         |         |            |               |   |
|------|---------|---------|------------|---------------|---|
| chr1 | 2878712 | 2878728 | CSAR_peak_ | 6.21          | + |
| chr1 | 2878747 | 2878788 | CSAR_peak_ | 10.02         | + |
| chr1 | 2883530 | 2883566 | CSAR_peak_ | 6.03          | + |
| chr1 | 2884787 | 2884802 | CSAR_peak_ | 8.28,7.27     | + |
| chr1 | 2884934 | 2885011 | CSAR_peak_ | 6.95,8.65     | + |
| chr1 | 2885250 | 2885322 | CSAR_peak_ | 16.33,8.39    | + |
| chr1 | 2885489 | 2885561 | CSAR_peak_ | 14.63         | + |
| chr1 | 2885602 | 2885669 | CSAR_peak_ | 8.13,7.36     | + |
| chr1 | 2885736 | 2885771 | CSAR_peak_ | 5.62          | + |
| chr1 | 2885830 | 2885930 | CSAR_peak_ | 11.83,10.7    | + |
| chr1 | 2886165 | 2886234 | CSAR_peak_ | 6.21,6.57     | + |
| chr1 | 2886314 | 2886364 | CSAR_peak_ | 7.27          | + |
| chr1 | 2887397 | 2887454 | CSAR_peak_ | 7.27,7.27     | + |
| chr1 | 2927733 | 2927848 | CSAR_peak_ | 25.9,27.17    | + |
| chr1 | 2927870 | 2927987 | CSAR_peak_ | 21,7.04       | + |
| chr1 | 2928023 | 2928157 | CSAR_peak_ | 9.79,7.31     | + |
| chr1 | 2928163 | 2928275 | CSAR_peak_ | 10.62         | + |
| chr1 | 2928330 | 2928386 | CSAR_peak_ | 11.17,10.02   | + |
| chr1 | 2928552 | 2928639 | CSAR_peak_ | 10.02,11.81,  | + |
| chr1 | 2929109 | 2929159 | CSAR_peak_ | 8.39          | + |
| chr1 | 3009140 | 3009195 | CSAR_peak_ | 14.76,8.95    | + |
| chr1 | 3033609 | 3033668 | CSAR_peak_ | 8.65          | + |
| chr1 | 3036048 | 3036091 | CSAR_peak_ | 7.27          | + |
| chr1 | 3036163 | 3036215 | CSAR_peak_ | 10.83         | + |
| chr1 | 3042534 | 3042586 | CSAR_peak_ | 13.48,6.21    | + |
| chr1 | 3042617 | 3042636 | CSAR_peak_ | 6.44          | + |
| chr1 | 3042729 | 3042788 | CSAR_peak_ | 12.31         | + |
| chr1 | 3042867 | 3042905 | CSAR_peak_ | 8.09          | + |
| chr1 | 3043016 | 3043082 | CSAR_peak_ | 6.03          | + |
| chr1 | 3043960 | 3044019 | CSAR_peak_ | 9.61,7.26,6.9 | + |
| chr1 | 3044226 | 3044296 | CSAR_peak_ | 8.95,6.21     | + |
| chr1 | 3078552 | 3078607 | CSAR_peak_ | 7.92,6.57     | + |
| chr1 | 3164607 | 3164653 | CSAR_peak_ | 6.57          | + |
| chr1 | 3164766 | 3164804 | CSAR_peak_ | 7.92          | + |
| chr1 | 3202907 | 3202945 | CSAR_peak_ | 6.57          | + |
| chr1 | 3206211 | 3206314 | CSAR_peak_ | 7.27          | + |
| chr1 | 3206424 | 3206488 | CSAR_peak_ | 7.58          | + |
| chr1 | 3206615 | 3206669 | CSAR_peak_ | 13.44,6.02,5. | + |
| chr1 | 3206813 | 3206845 | CSAR_peak_ | 8.39          | + |
| chr1 | 3206964 | 3207011 | CSAR_peak_ | 6.21          | + |
| chr1 | 3207820 | 3207849 | CSAR_peak_ | 6.21          | + |
| chr1 | 3253688 | 3253785 | CSAR_peak_ | 6.95          | + |

|      |         |         |            |               |   |
|------|---------|---------|------------|---------------|---|
| chr1 | 3254488 | 3254546 | CSAR_peak_ | 19.36,7.27    | + |
| chr1 | 3254640 | 3254739 | CSAR_peak_ | 7.36          | + |
| chr1 | 3254935 | 3254965 | CSAR_peak_ | 6.95          | + |
| chr1 | 3255030 | 3255070 | CSAR_peak_ | 8.65          | + |
| chr1 | 3255097 | 3255284 | CSAR_peak_ | 9.43,20.54    | + |
| chr1 | 3255293 | 3255310 | CSAR_peak_ | 6.57          | + |
| chr1 | 3284681 | 3284726 | CSAR_peak_ | 8.39          | + |
| chr1 | 3285877 | 3285918 | CSAR_peak_ | 6.57          | + |
| chr1 | 3288304 | 3288513 | CSAR_peak_ | 13.51         | + |
| chr1 | 3288655 | 3288797 | CSAR_peak_ | 15.2          | + |
| chr1 | 3288861 | 3288897 | CSAR_peak_ | 6.95          | + |
| chr1 | 3288962 | 3289047 | CSAR_peak_ | 12.74         | + |
| chr1 | 3289154 | 3289252 | CSAR_peak_ | 8.65,6.57     | + |
| chr1 | 3289276 | 3289344 | CSAR_peak_ | 16.33,6.22    | + |
| chr1 | 3289371 | 3289434 | CSAR_peak_ | 13.44,9.27,8. | + |
| chr1 | 3289456 | 3289521 | CSAR_peak_ | 12.17,7.36    | + |
| chr1 | 3289664 | 3289722 | CSAR_peak_ | 10.7,13.44    | + |
| chr1 | 3289760 | 3289969 | CSAR_peak_ | 6.11,6.57,7.5 | + |
| chr1 | 3290050 | 3290096 | CSAR_peak_ | 8.09          | + |
| chr1 | 3290211 | 3290270 | CSAR_peak_ | 13.44         | + |
| chr1 | 3290561 | 3290615 | CSAR_peak_ | 8.9,7.36,9.61 | + |
| chr1 | 3290972 | 3291023 | CSAR_peak_ | 10.83         | + |
| chr1 | 3291029 | 3291093 | CSAR_peak_ | 6.21,13.48    | + |
| chr1 | 3291719 | 3291773 | CSAR_peak_ | 7.27          | + |
| chr1 | 3296816 | 3296868 | CSAR_peak_ | 10.83         | + |
| chr1 | 3315569 | 3315605 | CSAR_peak_ | 7.27          | + |
| chr1 | 3315990 | 3316040 | CSAR_peak_ | 7.27          | + |
| chr1 | 3316432 | 3316487 | CSAR_peak_ | 8.95          | + |
| chr1 | 3319139 | 3319182 | CSAR_peak_ | 9.77          | + |
| chr1 | 3319988 | 3320033 | CSAR_peak_ | 8.39          | + |
| chr1 | 3320849 | 3320869 | CSAR_peak_ | 8.65          | + |
| chr1 | 3320985 | 3321033 | CSAR_peak_ | 8.28,7.58     | + |
| chr1 | 3327019 | 3327072 | CSAR_peak_ | 7.27          | + |
| chr1 | 3327132 | 3327203 | CSAR_peak_ | 16.33,6.45    | + |
| chr1 | 3437685 | 3437733 | CSAR_peak_ | 6.02          | + |
| chr1 | 3462743 | 3462785 | CSAR_peak_ | 7.27          | + |
| chr1 | 3467763 | 3467845 | CSAR_peak_ | 12.13         | + |
| chr1 | 3469625 | 3469849 | CSAR_peak_ | 30.51,46.37,  | + |
| chr1 | 3469968 | 3469970 | CSAR_peak_ | 6.37          | + |
| chr1 | 3487620 | 3487687 | CSAR_peak_ | 13.48         | + |
| chr1 | 3487864 | 3487959 | CSAR_peak_ | 11.38,5.62,6. | + |
| chr1 | 3488278 | 3488315 | CSAR_peak_ | 6.21          | + |



|      |         |         |            |                |   |
|------|---------|---------|------------|----------------|---|
| chr1 | 3488366 | 3488378 | CSAR_peak_ | 11.14          | + |
| chr1 | 3488666 | 3488740 | CSAR_peak_ | 6.57,11.38,6.  | + |
| chr1 | 3489203 | 3489241 | CSAR_peak_ | 7.27           | + |
| chr1 | 3505016 | 3505062 | CSAR_peak_ | 6.57           | + |
| chr1 | 3508441 | 3508507 | CSAR_peak_ | 8.39           | + |
| chr1 | 3537365 | 3537416 | CSAR_peak_ | 8.65           | + |
| chr1 | 3537516 | 3537593 | CSAR_peak_ | 7.27           | + |
| chr1 | 3628144 | 3628192 | CSAR_peak_ | 6.03           | + |
| chr1 | 3628297 | 3628351 | CSAR_peak_ | 9.77           | + |
| chr1 | 3628417 | 3628614 | CSAR_peak_ | 10.83,16.33    | + |
| chr1 | 3629240 | 3629310 | CSAR_peak_ | 6.21,16.11,1(+ |   |
| chr1 | 3629374 | 3629430 | CSAR_peak_ | 7.58           | + |
| chr1 | 3629791 | 3629842 | CSAR_peak_ | 6.57           | + |
| chr1 | 3629845 | 3629920 | CSAR_peak_ | 7.58           | + |
| chr1 | 3629952 | 3630054 | CSAR_peak_ | 7.29,6.44      | + |
| chr1 | 3630354 | 3630464 | CSAR_peak_ | 17.51,31.95    | + |
| chr1 | 3660478 | 3660518 | CSAR_peak_ | 7.27           | + |
| chr1 | 3661364 | 3661455 | CSAR_peak_ | 10.83          | + |
| chr1 | 3661779 | 3661856 | CSAR_peak_ | 6.45,6.78      | + |
| chr1 | 3661957 | 3662043 | CSAR_peak_ | 18.95,23.95,1+ |   |
| chr1 | 3662104 | 3662147 | CSAR_peak_ | 8.39           | + |
| chr1 | 3663422 | 3663471 | CSAR_peak_ | 6.03,6.57      | + |
| chr1 | 3746570 | 3746633 | CSAR_peak_ | 7.58,14.76,6.  | + |
| chr1 | 3747929 | 3747952 | CSAR_peak_ | 6.03           | + |
| chr1 | 3777390 | 3777401 | CSAR_peak_ | 6.57           | + |
| chr1 | 3777424 | 3777465 | CSAR_peak_ | 14.59          | + |
| chr1 | 3777521 | 3777626 | CSAR_peak_ | 20.28,31.44    | + |
| chr1 | 3777654 | 3777718 | CSAR_peak_ | 7.27,8.65      | + |
| chr1 | 3777726 | 3777772 | CSAR_peak_ | 8.39           | + |
| chr1 | 3777775 | 3777914 | CSAR_peak_ | 7.7,15.2,6.52+ |   |
| chr1 | 3777972 | 3778017 | CSAR_peak_ | 9.1            | + |
| chr1 | 3778157 | 3778277 | CSAR_peak_ | 12.39,11.41    | + |
| chr1 | 3778296 | 3778482 | CSAR_peak_ | 7.27,7.58,23.  | + |
| chr1 | 3778752 | 3779056 | CSAR_peak_ | 6.57,22.58,8.  | + |
| chr1 | 3779135 | 3779304 | CSAR_peak_ | 7.78,10.52,6.  | + |
| chr1 | 3779521 | 3779751 | CSAR_peak_ | 31.56,20.43,+  |   |
| chr1 | 3779932 | 3779984 | CSAR_peak_ | 9.02           | + |
| chr1 | 3779998 | 3780231 | CSAR_peak_ | 51.41,18.45,+  |   |
| chr1 | 3780423 | 3780475 | CSAR_peak_ | 14.88          | + |
| chr1 | 3832842 | 3832961 | CSAR_peak_ | 16.34,37.04    | + |
| chr1 | 3838816 | 3838850 | CSAR_peak_ | 6.21           | + |
| chr1 | 3839300 | 3839341 | CSAR_peak_ | 6.21           | + |

|      |         |         |            |               |   |
|------|---------|---------|------------|---------------|---|
| chr1 | 3839574 | 3839611 | CSAR_peak_ | 9.58          | + |
| chr1 | 3874555 | 3874596 | CSAR_peak_ | 8.39          | + |
| chr1 | 3874749 | 3874827 | CSAR_peak_ | 8.39          | + |
| chr1 | 3889086 | 3889193 | CSAR_peak_ | 7.78,8.39     | + |
| chr1 | 3889594 | 3889655 | CSAR_peak_ | 13.48,6.11,9. | + |
| chr1 | 3889703 | 3889860 | CSAR_peak_ | 6.21,8.39,12. | + |
| chr1 | 3889908 | 3890032 | CSAR_peak_ | 6.03,8.39     | + |
| chr1 | 3890131 | 3890301 | CSAR_peak_ | 15,15.2,6.21  | + |
| chr1 | 3890543 | 3890627 | CSAR_peak_ | 12.17,6.21    | + |
| chr1 | 3915092 | 3915134 | CSAR_peak_ | 6.57          | + |
| chr1 | 3915600 | 3915660 | CSAR_peak_ | 7.27          | + |
| chr1 | 3915739 | 3915894 | CSAR_peak_ | 7.27,9.58,6.2 | + |
| chr1 | 3917026 | 3917080 | CSAR_peak_ | 6.21          | + |
| chr1 | 3917167 | 3917309 | CSAR_peak_ | 12.13,6.65,1. | + |
| chr1 | 3923496 | 3923546 | CSAR_peak_ | 6.21          | + |
| chr1 | 3955939 | 3955993 | CSAR_peak_ | 6.21          | + |
| chr1 | 3996037 | 3996143 | CSAR_peak_ | 6.21,6.57     | + |
| chr1 | 3996312 | 3996363 | CSAR_peak_ | 10.83         | + |
| chr1 | 3996892 | 3996938 | CSAR_peak_ | 9.27          | + |
| chr1 | 3997096 | 3997142 | CSAR_peak_ | 7.58          | + |
| chr1 | 4004605 | 4004655 | CSAR_peak_ | 6.03          | + |
| chr1 | 4012054 | 4012107 | CSAR_peak_ | 8.39          | + |
| chr1 | 4012333 | 4012376 | CSAR_peak_ | 7.58          | + |
| chr1 | 4028827 | 4028885 | CSAR_peak_ | 6.57,13.51    | + |
| chr1 | 4029839 | 4029876 | CSAR_peak_ | 8.95          | + |
| chr1 | 4029905 | 4029952 | CSAR_peak_ | 10.95,12.31   | + |
| chr1 | 4030041 | 4030047 | CSAR_peak_ | 6.03          | + |
| chr1 | 4058264 | 4058420 | CSAR_peak_ | 19.36,111.12  | + |
| chr1 | 4058503 | 4058581 | CSAR_peak_ | 9.08,24.82,9. | + |
| chr1 | 4075393 | 4075440 | CSAR_peak_ | 7.58,12.31    | + |
| chr1 | 4106431 | 4106505 | CSAR_peak_ | 7.58          | + |
| chr1 | 4106530 | 4106587 | CSAR_peak_ | 8.65          | + |
| chr1 | 4108427 | 4108463 | CSAR_peak_ | 10.83         | + |
| chr1 | 4138855 | 4138909 | CSAR_peak_ | 7.27          | + |
| chr1 | 4145705 | 4145747 | CSAR_peak_ | 6.95          | + |
| chr1 | 4148912 | 4148959 | CSAR_peak_ | 7.34          | + |
| chr1 | 4149505 | 4149532 | CSAR_peak_ | 7.92          | + |
| chr1 | 4149621 | 4149652 | CSAR_peak_ | 11.38         | + |
| chr1 | 4150209 | 4150252 | CSAR_peak_ | 6.21          | + |
| chr1 | 4153733 | 4153808 | CSAR_peak_ | 9.58          | + |
| chr1 | 4154041 | 4154119 | CSAR_peak_ | 9.41,6.14,7.7 | + |
| chr1 | 4156040 | 4156103 | CSAR_peak_ | 16.08,8.72    | + |

|      |         |         |             |               |   |
|------|---------|---------|-------------|---------------|---|
| chr1 | 4156178 | 4156283 | CSAR_peak_3 | 12.17,6.94    | + |
| chr1 | 4156351 | 4156458 | CSAR_peak_3 | 15,6.78,7.58  | + |
| chr1 | 4156564 | 4156716 | CSAR_peak_3 | 9.58,16.33    | + |
| chr1 | 4156862 | 4156973 | CSAR_peak_3 | 6.03          | + |
| chr1 | 4157062 | 4157171 | CSAR_peak_4 | 24.15,13.89   | + |
| chr1 | 4157239 | 4157255 | CSAR_peak_4 | 10.66         | + |
| chr1 | 4158194 | 4158245 | CSAR_peak_3 | 16.11,6.64    | + |
| chr1 | 4158338 | 4158436 | CSAR_peak_3 | 10.95,6.21,7. | + |
| chr1 | 4158641 | 4158677 | CSAR_peak_4 | 6.57          | + |
| chr1 | 4158779 | 4158862 | CSAR_peak_3 | 6.87,20.43    | + |
| chr1 | 4159413 | 4159451 | CSAR_peak_4 | 6.21          | + |
| chr1 | 4159565 | 4159601 | CSAR_peak_3 | 6.57          | + |
| chr1 | 4159681 | 4159738 | CSAR_peak_4 | 8.39          | + |
| chr1 | 4160934 | 4160991 | CSAR_peak_3 | 6.57          | + |
| chr1 | 4201203 | 4201245 | CSAR_peak_3 | 16.33         | + |
| chr1 | 4201952 | 4202011 | CSAR_peak_3 | 6.21          | + |
| chr1 | 4203684 | 4203783 | CSAR_peak_3 | 6.45,12.13    | + |
| chr1 | 4204175 | 4204240 | CSAR_peak_3 | 6.21          | + |
| chr1 | 4204495 | 4204517 | CSAR_peak_4 | 13.48         | + |
| chr1 | 4204529 | 4204621 | CSAR_peak_3 | 7.58,9.97,10. | + |
| chr1 | 4205257 | 4205319 | CSAR_peak_3 | 6.85,8.39     | + |
| chr1 | 4205404 | 4205457 | CSAR_peak_3 | 9.03          | + |
| chr1 | 4205766 | 4205793 | CSAR_peak_3 | 8.39          | + |
| chr1 | 4205930 | 4205978 | CSAR_peak_3 | 6.21          | + |
| chr1 | 4223840 | 4223898 | CSAR_peak_3 | 6.57          | + |
| chr1 | 4251379 | 4251466 | CSAR_peak_3 | 7.27,6.44     | + |
| chr1 | 4256269 | 4256301 | CSAR_peak_4 | 6.21          | + |
| chr1 | 4256867 | 4256934 | CSAR_peak_4 | 8.39          | + |
| chr1 | 4283861 | 4283943 | CSAR_peak_4 | 10.83,7.27    | + |
| chr1 | 4284518 | 4284592 | CSAR_peak_3 | 9.58          | + |
| chr1 | 4285101 | 4285168 | CSAR_peak_4 | 6.21,14.34    | + |
| chr1 | 4285432 | 4285518 | CSAR_peak_3 | 11.14         | + |
| chr1 | 4348867 | 4348918 | CSAR_peak_3 | 6.57          | + |
| chr1 | 4350363 | 4350405 | CSAR_peak_3 | 7.27          | + |
| chr1 | 4350418 | 4350564 | CSAR_peak_3 | 10.95,14.85   | + |
| chr1 | 4467632 | 4467674 | CSAR_peak_4 | 6.21          | + |
| chr1 | 4468378 | 4468407 | CSAR_peak_4 | 7.27          | + |
| chr1 | 4499028 | 4499076 | CSAR_peak_4 | 7.27          | + |
| chr1 | 4499632 | 4499707 | CSAR_peak_3 | 6.21          | + |
| chr1 | 4499827 | 4499895 | CSAR_peak_3 | 6.95          | + |
| chr1 | 4500235 | 4500302 | CSAR_peak_3 | 8.65          | + |
| chr1 | 4501087 | 4501139 | CSAR_peak_4 | 7.27          | + |

|      |         |         |             |                  |   |
|------|---------|---------|-------------|------------------|---|
| chr1 | 4542373 | 4542430 | CSAR_peak_4 | 8.13             | + |
| chr1 | 4542433 | 4542605 | CSAR_peak_4 | 21.81,9.77       | + |
| chr1 | 4542622 | 4542966 | CSAR_peak_7 | 7.27,22.71,14.1  | + |
| chr1 | 4543100 | 4543262 | CSAR_peak_4 | 12.21,16.19,7.27 | + |
| chr1 | 4543277 | 4543379 | CSAR_peak_7 | 24,13.06         | + |
| chr1 | 4543521 | 4543558 | CSAR_peak_7 | 6.57             | + |
| chr1 | 4543678 | 4543776 | CSAR_peak_4 | 7.27             | + |
| chr1 | 4543818 | 4543864 | CSAR_peak_4 | 6.03             | + |
| chr1 | 4543946 | 4543993 | CSAR_peak_7 | 6.21             | + |
| chr1 | 4545689 | 4545769 | CSAR_peak_7 | 8.39,9.77        | + |
| chr1 | 4545818 | 4545915 | CSAR_peak_4 | 16.33            | + |
| chr1 | 4546069 | 4546151 | CSAR_peak_7 | 5.62,17.82,9.77  | + |
| chr1 | 4546274 | 4546298 | CSAR_peak_7 | 8.65             | + |
| chr1 | 4546461 | 4546552 | CSAR_peak_7 | 11.32,13.85      | + |
| chr1 | 4546563 | 4546634 | CSAR_peak_7 | 6.21,7.92,6.21   | + |
| chr1 | 4546644 | 4546742 | CSAR_peak_7 | 8.19,7.34        | + |
| chr1 | 4546856 | 4546913 | CSAR_peak_4 | 8.28,10.83       | + |
| chr1 | 4547005 | 4547076 | CSAR_peak_4 | 17.82,7.27       | + |
| chr1 | 4547637 | 4547680 | CSAR_peak_4 | 6.03             | + |
| chr1 | 4557293 | 4557357 | CSAR_peak_7 | 8.9              | + |
| chr1 | 4557479 | 4557506 | CSAR_peak_7 | 6.21             | + |
| chr1 | 4714782 | 4714864 | CSAR_peak_7 | 7.92,6.57        | + |
| chr1 | 4761077 | 4761421 | CSAR_peak_4 | 13.44,19.98,7.27 | + |
| chr1 | 4778611 | 4778664 | CSAR_peak_7 | 7.92,7.58        | + |
| chr1 | 4794998 | 4795046 | CSAR_peak_7 | 5.62             | + |
| chr1 | 4798356 | 4798481 | CSAR_peak_4 | 6.21,9.77        | + |
| chr1 | 4799748 | 4799813 | CSAR_peak_4 | 7.27             | + |
| chr1 | 4799917 | 4799955 | CSAR_peak_4 | 6.57             | + |
| chr1 | 4814438 | 4814476 | CSAR_peak_4 | 6.21             | + |
| chr1 | 4842348 | 4842475 | CSAR_peak_7 | 79.57,10.41,7.27 | + |
| chr1 | 4917766 | 4917814 | CSAR_peak_4 | 8.39             | + |
| chr1 | 4982728 | 4982798 | CSAR_peak_4 | 7.27             | + |
| chr1 | 5028927 | 5029027 | CSAR_peak_7 | 9.03,10.62       | + |
| chr1 | 5029075 | 5029279 | CSAR_peak_4 | 17.82,8.52,2.27  | + |
| chr1 | 5030263 | 5030339 | CSAR_peak_4 | 10.95,10.83      | + |
| chr1 | 5030399 | 5030452 | CSAR_peak_4 | 6.21             | + |
| chr1 | 5030839 | 5030885 | CSAR_peak_4 | 6.21             | + |
| chr1 | 5043175 | 5043224 | CSAR_peak_4 | 6.21             | + |
| chr1 | 5043417 | 5043571 | CSAR_peak_7 | 7.36,7.27,8.21   | + |
| chr1 | 5043585 | 5043652 | CSAR_peak_4 | 6.57             | + |
| chr1 | 5043765 | 5043812 | CSAR_peak_7 | 13.92            | + |
| chr1 | 5043862 | 5043907 | CSAR_peak_4 | 7.27             | + |

|      |         |         |             |                  |   |
|------|---------|---------|-------------|------------------|---|
| chr1 | 5125167 | 5125227 | CSAR_peak_4 | 6.21             | + |
| chr1 | 5171211 | 5171327 | CSAR_peak_4 | 13.49,12.78      | + |
| chr1 | 5171359 | 5171421 | CSAR_peak_4 | 13.76,10.95,11.4 | + |
| chr1 | 5171504 | 5171546 | CSAR_peak_4 | 6.21             | + |
| chr1 | 5171584 | 5171654 | CSAR_peak_4 | 8.65,6.03        | + |
| chr1 | 5171894 | 5171950 | CSAR_peak_4 | 8.95             | + |
| chr1 | 5172302 | 5172381 | CSAR_peak_4 | 8.39             | + |
| chr1 | 5201282 | 5201322 | CSAR_peak_4 | 6.95             | + |
| chr1 | 5247356 | 5247417 | CSAR_peak_4 | 8.39,6.21        | + |
| chr1 | 5247854 | 5247901 | CSAR_peak_4 | 13.48,7.27       | + |
| chr1 | 5252520 | 5252718 | CSAR_peak_4 | 12.13,10.31,11.4 | + |
| chr1 | 5252892 | 5252936 | CSAR_peak_4 | 7.73,10.95,8.39  | + |
| chr1 | 5253288 | 5253388 | CSAR_peak_4 | 23.49,12.14,11.4 | + |
| chr1 | 5253546 | 5253581 | CSAR_peak_4 | 8.95             | + |
| chr1 | 5253712 | 5253752 | CSAR_peak_4 | 8.39             | + |
| chr1 | 5254788 | 5254845 | CSAR_peak_4 | 10.95,13.51      | + |
| chr1 | 5254909 | 5254956 | CSAR_peak_4 | 8.65             | + |
| chr1 | 5255178 | 5255188 | CSAR_peak_4 | 6.03,6.95        | + |
| chr1 | 5255471 | 5255526 | CSAR_peak_4 | 8.39             | + |
| chr1 | 5256111 | 5256222 | CSAR_peak_4 | 9.58,7.34        | + |
| chr1 | 5290860 | 5290907 | CSAR_peak_4 | 6.57             | + |
| chr1 | 5290933 | 5291066 | CSAR_peak_4 | 11.07,8.13       | + |
| chr1 | 5291551 | 5291660 | CSAR_peak_4 | 27.64,11.14      | + |
| chr1 | 5291948 | 5292031 | CSAR_peak_4 | 7.73,16.33,8.39  | + |
| chr1 | 5390661 | 5390724 | CSAR_peak_4 | 6.21             | + |
| chr1 | 5391032 | 5391089 | CSAR_peak_4 | 8.65             | + |
| chr1 | 5399323 | 5399600 | CSAR_peak_4 | 23.93,8.52,21.4  | + |
| chr1 | 5399788 | 5399837 | CSAR_peak_4 | 7.29,11.39       | + |
| chr1 | 5399838 | 5399874 | CSAR_peak_4 | 6.01             | + |
| chr1 | 5399976 | 5400019 | CSAR_peak_4 | 9.32             | + |
| chr1 | 5400074 | 5400177 | CSAR_peak_4 | 21.22,7.47,11.4  | + |
| chr1 | 5400209 | 5400362 | CSAR_peak_4 | 12.13,7.7        | + |
| chr1 | 5400401 | 5400566 | CSAR_peak_4 | 17.51,8.39       | + |
| chr1 | 5400583 | 5400626 | CSAR_peak_4 | 10.33            | + |
| chr1 | 5400686 | 5400754 | CSAR_peak_4 | 7.27,6.65        | + |
| chr1 | 5400758 | 5400811 | CSAR_peak_4 | 12.6             | + |
| chr1 | 5400814 | 5400872 | CSAR_peak_4 | 11.14            | + |
| chr1 | 5400885 | 5400973 | CSAR_peak_4 | 9.41,6.74        | + |
| chr1 | 5401119 | 5401216 | CSAR_peak_4 | 11.28,8.5        | + |
| chr1 | 5401284 | 5401375 | CSAR_peak_4 | 14.76,13.51,11.4 | + |
| chr1 | 5401414 | 5401461 | CSAR_peak_4 | 11.38,6.57       | + |
| chr1 | 5401559 | 5401671 | CSAR_peak_4 | 11.66,6.28       | + |

|      |         |         |             |                  |     |
|------|---------|---------|-------------|------------------|-----|
| chr1 | 5401690 | 5401757 | CSAR_peak_4 | 13.48            | +   |
| chr1 | 5401806 | 5401911 | CSAR_peak_4 | 14.76,13.29,     | (+) |
| chr1 | 5401922 | 5402073 | CSAR_peak_7 | 7.58,20.94,11.14 | +   |
| chr1 | 5402210 | 5402249 | CSAR_peak_4 | 9.27             | +   |
| chr1 | 5402269 | 5402324 | CSAR_peak_4 | 19.36,14.88      | +   |
| chr1 | 5402371 | 5402413 | CSAR_peak_4 | 6.85             | +   |
| chr1 | 5402479 | 5402520 | CSAR_peak_4 | 7.27             | +   |
| chr1 | 5402584 | 5402904 | CSAR_peak_4 | 16.33,6.03,9.27  | +   |
| chr1 | 5403651 | 5403692 | CSAR_peak_4 | 9.58             | +   |
| chr1 | 5411006 | 5411054 | CSAR_peak_4 | 16.33            | +   |
| chr1 | 5411493 | 5411501 | CSAR_peak_4 | 6.57             | +   |
| chr1 | 5411765 | 5411819 | CSAR_peak_4 | 10.18            | +   |
| chr1 | 5411878 | 5411929 | CSAR_peak_4 | 8.39             | +   |
| chr1 | 5412166 | 5412221 | CSAR_peak_4 | 11.14            | +   |
| chr1 | 5412378 | 5412432 | CSAR_peak_4 | 9.58             | +   |
| chr1 | 5412476 | 5412489 | CSAR_peak_4 | 6.52             | +   |
| chr1 | 5412607 | 5412667 | CSAR_peak_4 | 10.96            | +   |
| chr1 | 5413004 | 5413071 | CSAR_peak_7 | 11.14,6.21       | +   |
| chr1 | 5413115 | 5413168 | CSAR_peak_4 | 6.57             | +   |
| chr1 | 5413280 | 5413336 | CSAR_peak_4 | 16.33,12.17      | +   |
| chr1 | 5413422 | 5413538 | CSAR_peak_4 | 19.98,7.69,2.27  | +   |
| chr1 | 5413830 | 5413896 | CSAR_peak_4 | 18.95,13.48      | +   |
| chr1 | 5413981 | 5414009 | CSAR_peak_4 | 7.27             | +   |
| chr1 | 5414012 | 5414053 | CSAR_peak_4 | 7.36             | +   |
| chr1 | 5455807 | 5455855 | CSAR_peak_4 | 6.21             | +   |
| chr1 | 5461748 | 5461795 | CSAR_peak_4 | 6.21             | +   |
| chr1 | 5474240 | 5474290 | CSAR_peak_4 | 7.27             | +   |
| chr1 | 5475426 | 5475474 | CSAR_peak_4 | 6.21             | +   |
| chr1 | 5476933 | 5477008 | CSAR_peak_4 | 19.98            | +   |
| chr1 | 5477246 | 5477361 | CSAR_peak_4 | 12.13            | +   |
| chr1 | 5477516 | 5477554 | CSAR_peak_4 | 7.27             | +   |
| chr1 | 5477717 | 5477744 | CSAR_peak_4 | 7.27             | +   |
| chr1 | 5477924 | 5477992 | CSAR_peak_4 | 6.21             | +   |
| chr1 | 5478943 | 5478988 | CSAR_peak_4 | 8.39             | +   |
| chr1 | 5479779 | 5479832 | CSAR_peak_4 | 12.13            | +   |
| chr1 | 5479883 | 5479918 | CSAR_peak_4 | 8.65,7.29        | +   |
| chr1 | 5479957 | 5479978 | CSAR_peak_4 | 8.39,6.21        | +   |
| chr1 | 5480189 | 5480223 | CSAR_peak_4 | 6.03             | +   |
| chr1 | 5480307 | 5480404 | CSAR_peak_4 | 7.27             | +   |
| chr1 | 5481689 | 5481736 | CSAR_peak_4 | 6.57             | +   |
| chr1 | 5515817 | 5515869 | CSAR_peak_4 | 6.21             | +   |
| chr1 | 5519429 | 5519453 | CSAR_peak_4 | 8.39             | +   |

|      |         |         |             |              |   |
|------|---------|---------|-------------|--------------|---|
| chr1 | 5519841 | 5519912 | CSAR_peak_  | 5.62,8.95    | + |
| chr1 | 5520484 | 5520539 | CSAR_peak_  | 6.21         | + |
| chr1 | 5541540 | 5541596 | CSAR_peak_  | 12.13        | + |
| chr1 | 5566712 | 5566776 | CSAR_peak_  | 9.58         | + |
| chr1 | 5624871 | 5624920 | CSAR_peak_  | 9.58         | + |
| chr1 | 5660297 | 5660347 | CSAR_peak_  | 7.27         | + |
| chr1 | 5664648 | 5664693 | CSAR_peak_  | 6.21         | + |
| chr1 | 5705352 | 5705410 | CSAR_peak_  | 7.58         | + |
| chr1 | 5715222 | 5715289 | CSAR_peak_  | 6.57,7.27    | + |
| chr1 | 5715376 | 5715407 | CSAR_peak_! | 6.21         | + |
| chr1 | 5717831 | 5717902 | CSAR_peak_  | 6.21,8.39    | + |
| chr1 | 5718385 | 5718443 | CSAR_peak_  | 10.83,5.62   | + |
| chr1 | 5718537 | 5718581 | CSAR_peak_  | 6.21         | + |
| chr1 | 5718752 | 5718816 | CSAR_peak_  | 7.73,7.73    | + |
| chr1 | 5719365 | 5719412 | CSAR_peak_  | 6.21         | + |
| chr1 | 5720276 | 5720303 | CSAR_peak_  | 7.92         | + |
| chr1 | 5720461 | 5720504 | CSAR_peak_  | 8.65,9.27    | + |
| chr1 | 5721668 | 5721735 | CSAR_peak_! | 9.58         | + |
| chr1 | 5721999 | 5722093 | CSAR_peak_! | 7.27         | + |
| chr1 | 5725339 | 5725393 | CSAR_peak_  | 7.34         | + |
| chr1 | 5725690 | 5725722 | CSAR_peak_  | 6.03         | + |
| chr1 | 5756447 | 5756500 | CSAR_peak_  | 7.58         | + |
| chr1 | 5758388 | 5758585 | CSAR_peak_  | 111.21,22.49 | + |
| chr1 | 5767462 | 5767522 | CSAR_peak_  | 6.44         | + |
| chr1 | 5769334 | 5769390 | CSAR_peak_  | 6.21,7.27    | + |
| chr1 | 5769847 | 5769908 | CSAR_peak_  | 5.62,16.11   | + |
| chr1 | 5773886 | 5773946 | CSAR_peak_  | 7.26         | + |
| chr1 | 5774532 | 5774570 | CSAR_peak_! | 6.95         | + |
| chr1 | 5774785 | 5774828 | CSAR_peak_  | 14.76,12.13  | + |
| chr1 | 5774955 | 5775023 | CSAR_peak_  | 17.02        | + |
| chr1 | 5775194 | 5775240 | CSAR_peak_  | 14.88        | + |
| chr1 | 5775295 | 5775434 | CSAR_peak_  | 8.95,9.27    | + |
| chr1 | 5775507 | 5775596 | CSAR_peak_  | 12.94,10.57  | + |
| chr1 | 5775739 | 5775766 | CSAR_peak_! | 6.95         | + |
| chr1 | 5775770 | 5775810 | CSAR_peak_  | 5.99         | + |
| chr1 | 5775937 | 5775973 | CSAR_peak_! | 6.57         | + |
| chr1 | 5855219 | 5855273 | CSAR_peak_! | 8.39         | + |
| chr1 | 5855457 | 5855481 | CSAR_peak_! | 6.21         | + |
| chr1 | 5886750 | 5886854 | CSAR_peak_  | 6.57,8.39    | + |
| chr1 | 5924846 | 5924877 | CSAR_peak_! | 8.09         | + |
| chr1 | 5925681 | 5925728 | CSAR_peak_! | 12.13        | + |
| chr1 | 5925842 | 5925885 | CSAR_peak_  | 8.39         | + |

|      |         |         |             |                  |   |
|------|---------|---------|-------------|------------------|---|
| chr1 | 5925960 | 5925998 | CSAR_peak_! | 6.21             | + |
| chr1 | 5926006 | 5926095 | CSAR_peak_! | 8.65             | + |
| chr1 | 5929965 | 5930015 | CSAR_peak_! | 5.62             | + |
| chr1 | 5934698 | 5934811 | CSAR_peak_! | 9.58,6.57        | + |
| chr1 | 5934828 | 5934883 | CSAR_peak_! | 7.78             | + |
| chr1 | 5936131 | 5936213 | CSAR_peak_! | 13.48,6.21,10.21 | + |
| chr1 | 5936308 | 5936369 | CSAR_peak_! | 7.73,17.82       | + |
| chr1 | 5936380 | 5936528 | CSAR_peak_! | 8.95,15,27.6     | + |
| chr1 | 5936555 | 5936615 | CSAR_peak_! | 9.58             | + |
| chr1 | 5936987 | 5937042 | CSAR_peak_! | 10.83            | + |
| chr1 | 5937259 | 5937301 | CSAR_peak_! | 7.27             | + |
| chr1 | 5937418 | 5937500 | CSAR_peak_! | 11.38,9.58       | + |
| chr1 | 5937715 | 5937732 | CSAR_peak_! | 6.21             | + |
| chr1 | 5937965 | 5938020 | CSAR_peak_! | 20.94,8.65       | + |
| chr1 | 5938121 | 5938189 | CSAR_peak_! | 8.39             | + |
| chr1 | 5942806 | 5942850 | CSAR_peak_! | 6.21             | + |
| chr1 | 5947683 | 5947763 | CSAR_peak_! | 8.39,13.48       | + |
| chr1 | 5948478 | 5948563 | CSAR_peak_! | 6.21             | + |
| chr1 | 5949387 | 5949424 | CSAR_peak_! | 6.21             | + |
| chr1 | 5949759 | 5949812 | CSAR_peak_! | 8.39             | + |
| chr1 | 5977712 | 5977793 | CSAR_peak_! | 7.73             | + |
| chr1 | 5977824 | 5977903 | CSAR_peak_! | 25.21,22.58      | + |
| chr1 | 5978006 | 5978088 | CSAR_peak_! | 14.34            | + |
| chr1 | 5978505 | 5978656 | CSAR_peak_! | 38.86,7.03,6.21  | + |
| chr1 | 5978680 | 5978736 | CSAR_peak_! | 7.92,12.6        | + |
| chr1 | 5978828 | 5978943 | CSAR_peak_! | 13.66,6.87,8.39  | + |
| chr1 | 5979137 | 5979190 | CSAR_peak_! | 6.21,8.65        | + |
| chr1 | 5979527 | 5979614 | CSAR_peak_! | 6.02,8.39,17.82  | + |
| chr1 | 5979876 | 5979933 | CSAR_peak_! | 8.39             | + |
| chr1 | 5980139 | 5980156 | CSAR_peak_! | 7.27             | + |
| chr1 | 5980244 | 5980324 | CSAR_peak_! | 8.39,6.03        | + |
| chr1 | 5980338 | 5980391 | CSAR_peak_! | 10.02            | + |
| chr1 | 5981272 | 5981340 | CSAR_peak_! | 6.03             | + |
| chr1 | 5983185 | 5983235 | CSAR_peak_! | 8.39             | + |
| chr1 | 6034762 | 6034788 | CSAR_peak_! | 6.21             | + |
| chr1 | 6035888 | 6035970 | CSAR_peak_! | 16.33,5.62       | + |
| chr1 | 6040655 | 6040717 | CSAR_peak_! | 8.39             | + |
| chr1 | 6045526 | 6045584 | CSAR_peak_! | 6.44             | + |
| chr1 | 6047006 | 6047036 | CSAR_peak_! | 6.21             | + |
| chr1 | 6048411 | 6048441 | CSAR_peak_! | 7.58             | + |
| chr1 | 6062828 | 6062962 | CSAR_peak_! | 7.27             | + |
| chr1 | 6080054 | 6080119 | CSAR_peak_! | 9.77,7.92        | + |



|      |         |         |             |                |   |
|------|---------|---------|-------------|----------------|---|
| chr1 | 6099899 | 6099935 | CSAR_peak_! | 8.39           | + |
| chr1 | 6099988 | 6100058 | CSAR_peak_! | 7.27           | + |
| chr1 | 6143505 | 6143563 | CSAR_peak_! | 9.77           | + |
| chr1 | 6143614 | 6143656 | CSAR_peak_! | 6.57           | + |
| chr1 | 6203152 | 6203199 | CSAR_peak_! | 9.77,8.65      | + |
| chr1 | 6203241 | 6203355 | CSAR_peak_! | 6.44,8.95      | + |
| chr1 | 6203534 | 6203605 | CSAR_peak_! | 6.57           | + |
| chr1 | 6204449 | 6204471 | CSAR_peak_! | 6.57           | + |
| chr1 | 6204506 | 6204566 | CSAR_peak_! | 9.61           | + |
| chr1 | 6204894 | 6204946 | CSAR_peak_! | 5.95,6.45,6.2  | + |
| chr1 | 6205435 | 6205481 | CSAR_peak_! | 5.62           | + |
| chr1 | 6206331 | 6206352 | CSAR_peak_! | 6.57           | + |
| chr1 | 6207664 | 6207724 | CSAR_peak_! | 8.39           | + |
| chr1 | 6207850 | 6207939 | CSAR_peak_! | 8.39           | + |
| chr1 | 6250444 | 6250541 | CSAR_peak_! | 6.21,8.65      | + |
| chr1 | 6251988 | 6252041 | CSAR_peak_! | 6.85           | + |
| chr1 | 6252097 | 6252128 | CSAR_peak_! | 6.95           | + |
| chr1 | 6252269 | 6252322 | CSAR_peak_! | 11.8           | + |
| chr1 | 6253309 | 6253359 | CSAR_peak_! | 9.61           | + |
| chr1 | 6253438 | 6253492 | CSAR_peak_! | 6.02           | + |
| chr1 | 6253525 | 6253628 | CSAR_peak_! | 6.85           | + |
| chr1 | 6299809 | 6299906 | CSAR_peak_! | 12.21,15       | + |
| chr1 | 6299945 | 6300058 | CSAR_peak_! | 39.45,19.04,(+ |   |
| chr1 | 6300117 | 6300468 | CSAR_peak_! | 30.93,6.57,2.1 | + |
| chr1 | 6300472 | 6300572 | CSAR_peak_! | 22.26,21.95    | + |
| chr1 | 6300585 | 6300606 | CSAR_peak_! | 6.21           | + |
| chr1 | 6300645 | 6300734 | CSAR_peak_! | 25.7           | + |
| chr1 | 6300743 | 6300979 | CSAR_peak_! | 15.7,19.39,1.1 | + |
| chr1 | 6301123 | 6301206 | CSAR_peak_! | 6.57,19.36     | + |
| chr1 | 6301291 | 6301482 | CSAR_peak_! | 17.82,10.62,(+ |   |
| chr1 | 6301765 | 6301869 | CSAR_peak_! | 8.65,12.13     | + |
| chr1 | 6301958 | 6302012 | CSAR_peak_! | 6.21           | + |
| chr1 | 6302123 | 6302169 | CSAR_peak_! | 6.85           | + |
| chr1 | 6302317 | 6302456 | CSAR_peak_! | 16.33,9.77     | + |
| chr1 | 6302561 | 6302674 | CSAR_peak_! | 16.33,9.27     | + |
| chr1 | 6303573 | 6303668 | CSAR_peak_! | 17.82,12.13    | + |
| chr1 | 6303699 | 6303793 | CSAR_peak_! | 9.58           | + |
| chr1 | 6303884 | 6303915 | CSAR_peak_! | 13.48          | + |
| chr1 | 6304027 | 6304088 | CSAR_peak_! | 6.95,7.27      | + |
| chr1 | 6304376 | 6304421 | CSAR_peak_! | 7.27           | + |
| chr1 | 6304439 | 6304551 | CSAR_peak_! | 13.48,9.77     | + |
| chr1 | 6304892 | 6304949 | CSAR_peak_! | 7.58           | + |

|      |         |         |             |              |   |
|------|---------|---------|-------------|--------------|---|
| chr1 | 6328672 | 6328722 | CSAR_peak_! | 7.27         | + |
| chr1 | 6329762 | 6329798 | CSAR_peak_! | 8.39         | + |
| chr1 | 6348763 | 6348819 | CSAR_peak_! | 7.27         | + |
| chr1 | 6350720 | 6350751 | CSAR_peak_! | 7.27         | + |
| chr1 | 6352672 | 6352712 | CSAR_peak_! | 10.83        | + |
| chr1 | 6353820 | 6353865 | CSAR_peak_! | 8.39         | + |
| chr1 | 6353914 | 6353960 | CSAR_peak_! | 10.95        | + |
| chr1 | 6354247 | 6354323 | CSAR_peak_! | 7.58,7.27    | + |
| chr1 | 6370505 | 6370544 | CSAR_peak_! | 6.03         | + |
| chr1 | 6370941 | 6370981 | CSAR_peak_! | 5.62,8.65    | + |
| chr1 | 6371132 | 6371186 | CSAR_peak_! | 13.51,6.57   | + |
| chr1 | 6371327 | 6371387 | CSAR_peak_! | 6.85         | + |
| chr1 | 6372228 | 6372269 | CSAR_peak_! | 7.27         | + |
| chr1 | 6372322 | 6372378 | CSAR_peak_! | 8.39,16.05   | + |
| chr1 | 6407670 | 6407718 | CSAR_peak_! | 6.57         | + |
| chr1 | 6413060 | 6413110 | CSAR_peak_! | 7.27         | + |
| chr1 | 6413456 | 6413511 | CSAR_peak_! | 8.95         | + |
| chr1 | 6413893 | 6413956 | CSAR_peak_! | 7.27         | + |
| chr1 | 6414187 | 6414277 | CSAR_peak_! | 7.27         | + |
| chr1 | 6414710 | 6414777 | CSAR_peak_! | 10.83        | + |
| chr1 | 6421249 | 6421318 | CSAR_peak_! | 6.21         | + |
| chr1 | 6421474 | 6421502 | CSAR_peak_! | 6.95         | + |
| chr1 | 6421644 | 6421662 | CSAR_peak_! | 6.57         | + |
| chr1 | 6422373 | 6422444 | CSAR_peak_! | 8.13,8.65    | + |
| chr1 | 6423175 | 6423221 | CSAR_peak_! | 6.21         | + |
| chr1 | 6423329 | 6423361 | CSAR_peak_! | 6.21         | + |
| chr1 | 6423493 | 6423507 | CSAR_peak_! | 8.39         | + |
| chr1 | 6423839 | 6423878 | CSAR_peak_! | 10.94        | + |
| chr1 | 6423983 | 6424018 | CSAR_peak_! | 5.62         | + |
| chr1 | 6424335 | 6424383 | CSAR_peak_! | 7.26         | + |
| chr1 | 6425390 | 6425415 | CSAR_peak_! | 10.33        | + |
| chr1 | 6425506 | 6425579 | CSAR_peak_! | 7.34,6.52    | + |
| chr1 | 6437851 | 6437876 | CSAR_peak_! | 6.21         | + |
| chr1 | 6439532 | 6439589 | CSAR_peak_! | 6.21         | + |
| chr1 | 6439668 | 6439766 | CSAR_peak_! | 10.83        | + |
| chr1 | 6441013 | 6441050 | CSAR_peak_! | 7.92         | + |
| chr1 | 6442231 | 6442305 | CSAR_peak_! | 9.58         | + |
| chr1 | 6442570 | 6442641 | CSAR_peak_! | 12.13        | + |
| chr1 | 6464112 | 6464164 | CSAR_peak_! | 14.88        | + |
| chr1 | 6464459 | 6464503 | CSAR_peak_! | 7.27         | + |
| chr1 | 6464524 | 6464587 | CSAR_peak_! | 9.35,11.96   | + |
| chr1 | 6464615 | 6464747 | CSAR_peak_! | 15,8.65,8.39 | + |

|      |         |         |             |               |   |
|------|---------|---------|-------------|---------------|---|
| chr1 | 6464838 | 6464949 | CSAR_peak_! | 11.38         | + |
| chr1 | 6464955 | 6465010 | CSAR_peak_! | 6.58          | + |
| chr1 | 6465027 | 6465074 | CSAR_peak_! | 7.77          | + |
| chr1 | 6465105 | 6465120 | CSAR_peak_! | 8.09          | + |
| chr1 | 6465122 | 6465192 | CSAR_peak_! | 8.84          | + |
| chr1 | 6517450 | 6517489 | CSAR_peak_! | 9.58          | + |
| chr1 | 6517867 | 6517903 | CSAR_peak_! | 6.95          | + |
| chr1 | 6550637 | 6550677 | CSAR_peak_! | 6.44          | + |
| chr1 | 6568102 | 6568185 | CSAR_peak_! | 13.48,13.01   | + |
| chr1 | 6568204 | 6568279 | CSAR_peak_! | 14.92,7.31    | + |
| chr1 | 6568785 | 6568839 | CSAR_peak_! | 6.21          | + |
| chr1 | 6602869 | 6602921 | CSAR_peak_! | 6.21          | + |
| chr1 | 6604781 | 6604838 | CSAR_peak_! | 8.65          | + |
| chr1 | 6605241 | 6605296 | CSAR_peak_! | 8.65,6.03     | + |
| chr1 | 6622173 | 6622368 | CSAR_peak_! | 11.8,20.83,6. | + |
| chr1 | 6622374 | 6622499 | CSAR_peak_! | 27.38,21.52,; | + |
| chr1 | 6622571 | 6622802 | CSAR_peak_! | 18.49,49.47,; | + |
| chr1 | 6622827 | 6623344 | CSAR_peak_! | 14.51,13.95,; | + |
| chr1 | 6623372 | 6623482 | CSAR_peak_! | 7.92,12.13    | + |
| chr1 | 6623741 | 6623817 | CSAR_peak_! | 10.02,8.65    | + |
| chr1 | 6623884 | 6623955 | CSAR_peak_! | 7.58          | + |
| chr1 | 6624163 | 6624252 | CSAR_peak_! | 14.34,8.65    | + |
| chr1 | 6624378 | 6624418 | CSAR_peak_! | 8.39          | + |
| chr1 | 6624523 | 6624590 | CSAR_peak_! | 10.94         | + |
| chr1 | 6624640 | 6624708 | CSAR_peak_! | 6.52,13.44    | + |
| chr1 | 6624766 | 6624809 | CSAR_peak_! | 6.21          | + |
| chr1 | 6663771 | 6663837 | CSAR_peak_! | 6.87          | + |
| chr1 | 6664636 | 6664703 | CSAR_peak_! | 16.05,8.28    | + |
| chr1 | 6664776 | 6664843 | CSAR_peak_! | 8.13,12.31    | + |
| chr1 | 6665128 | 6665242 | CSAR_peak_! | 17.82,10.94   | + |
| chr1 | 6665532 | 6665559 | CSAR_peak_! | 6.03          | + |
| chr1 | 6688859 | 6688976 | CSAR_peak_! | 17.37,11.72   | + |
| chr1 | 6689033 | 6689105 | CSAR_peak_! | 8.39,13.51    | + |
| chr1 | 6689422 | 6689469 | CSAR_peak_! | 7.92          | + |
| chr1 | 6690110 | 6690175 | CSAR_peak_! | 6.21          | + |
| chr1 | 6697162 | 6697258 | CSAR_peak_! | 60.02,52,5.8; | + |
| chr1 | 6697436 | 6697528 | CSAR_peak_! | 90.04,18.87,; | + |
| chr1 | 6698149 | 6698247 | CSAR_peak_! | 6.21,8.39     | + |
| chr1 | 6698282 | 6698370 | CSAR_peak_! | 17.51,6.1,22. | + |
| chr1 | 6698408 | 6698466 | CSAR_peak_! | 8.39,9.03,10. | + |
| chr1 | 6709921 | 6709959 | CSAR_peak_! | 6.03,9.27     | + |
| chr1 | 6711432 | 6711532 | CSAR_peak_! | 7.27,5.62     | + |

|      |         |         |             |               |   |
|------|---------|---------|-------------|---------------|---|
| chr1 | 6749984 | 6750050 | CSAR_peak_! | 6.21          | + |
| chr1 | 6764145 | 6764186 | CSAR_peak_! | 7.78          | + |
| chr1 | 6764187 | 6764255 | CSAR_peak_! | 12.94,6.03,8. | + |
| chr1 | 6764383 | 6764423 | CSAR_peak_! | 7.34          | + |
| chr1 | 6764533 | 6764580 | CSAR_peak_! | 7.58          | + |
| chr1 | 6764599 | 6764637 | CSAR_peak_! | 6.85          | + |
| chr1 | 6764639 | 6764702 | CSAR_peak_! | 8.39          | + |
| chr1 | 6764781 | 6764869 | CSAR_peak_! | 12.13,8.39    | + |
| chr1 | 6764953 | 6764997 | CSAR_peak_! | 7.27          | + |
| chr1 | 6765729 | 6765782 | CSAR_peak_! | 7.27          | + |
| chr1 | 6766445 | 6766477 | CSAR_peak_! | 9.58          | + |
| chr1 | 6766784 | 6766849 | CSAR_peak_! | 8.39,6.21     | + |
| chr1 | 6775411 | 6775450 | CSAR_peak_! | 6.03          | + |
| chr1 | 6824476 | 6824526 | CSAR_peak_! | 6.21          | + |
| chr1 | 6825718 | 6825773 | CSAR_peak_! | 7.27          | + |
| chr1 | 6825922 | 6825990 | CSAR_peak_! | 14.88         | + |
| chr1 | 6826053 | 6826183 | CSAR_peak_! | 8.39,7.27     | + |
| chr1 | 6826701 | 6826752 | CSAR_peak_! | 7.27          | + |
| chr1 | 6826928 | 6826960 | CSAR_peak_! | 6.21          | + |
| chr1 | 6829040 | 6829155 | CSAR_peak_! | 7.27          | + |
| chr1 | 6829443 | 6829561 | CSAR_peak_! | 7.27,6.21,5.6 | + |
| chr1 | 6829634 | 6829674 | CSAR_peak_! | 6.21,7.58     | + |
| chr1 | 6829847 | 6829919 | CSAR_peak_! | 11.38,7.92,1. | + |
| chr1 | 6832190 | 6832242 | CSAR_peak_! | 6.21,6.21     | + |
| chr1 | 6832360 | 6832466 | CSAR_peak_! | 10.83,10.83   | + |
| chr1 | 6832704 | 6832791 | CSAR_peak_! | 8.65          | + |
| chr1 | 6833374 | 6833470 | CSAR_peak_! | 8.65,6.21     | + |
| chr1 | 6833504 | 6833559 | CSAR_peak_! | 8.39,7.27     | + |
| chr1 | 6833588 | 6833639 | CSAR_peak_! | 14.88         | + |
| chr1 | 6834001 | 6834055 | CSAR_peak_! | 11.14         | + |
| chr1 | 6913288 | 6913361 | CSAR_peak_! | 12.13         | + |
| chr1 | 6913492 | 6913554 | CSAR_peak_! | 11.14         | + |
| chr1 | 6913731 | 6913779 | CSAR_peak_! | 8.39          | + |
| chr1 | 6941284 | 6941378 | CSAR_peak_! | 7.59,5.64,29. | + |
| chr1 | 6942827 | 6942882 | CSAR_peak_! | 6.21          | + |
| chr1 | 6943001 | 6943138 | CSAR_peak_! | 10.7,7.73,9.5 | + |
| chr1 | 6943296 | 6943328 | CSAR_peak_! | 8.39          | + |
| chr1 | 6943391 | 6943431 | CSAR_peak_! | 8.65          | + |
| chr1 | 6943432 | 6943484 | CSAR_peak_! | 18.35         | + |
| chr1 | 6943582 | 6943624 | CSAR_peak_! | 9.55          | + |
| chr1 | 6943656 | 6943730 | CSAR_peak_! | 7.47,8.3      | + |
| chr1 | 6943791 | 6943796 | CSAR_peak_! | 6.1           | + |

|      |         |         |             |               |   |
|------|---------|---------|-------------|---------------|---|
| chr1 | 6943815 | 6943860 | CSAR_peak_! | 16.05         | + |
| chr1 | 6943955 | 6944044 | CSAR_peak_! | 6.21          | + |
| chr1 | 6944144 | 6944163 | CSAR_peak_! | 7.92          | + |
| chr1 | 6944202 | 6944352 | CSAR_peak_! | 17.37,8.65,7. | + |
| chr1 | 6944658 | 6944711 | CSAR_peak_! | 6.84,7.63     | + |
| chr1 | 6967415 | 6967462 | CSAR_peak_! | 6.21          | + |
| chr1 | 6967663 | 6967705 | CSAR_peak_! | 7.7           | + |
| chr1 | 6968360 | 6968406 | CSAR_peak_! | 7.27,6.21     | + |
| chr1 | 6972495 | 6972559 | CSAR_peak_! | 17.82,6.21    | + |
| chr1 | 6972620 | 6972718 | CSAR_peak_! | 12.17,6.45    | + |
| chr1 | 6973100 | 6973175 | CSAR_peak_! | 11.14         | + |
| chr1 | 6973329 | 6973349 | CSAR_peak_! | 6.57          | + |
| chr1 | 6973777 | 6973829 | CSAR_peak_! | 17.51,10.33   | + |
| chr1 | 6973938 | 6973972 | CSAR_peak_! | 10.57,8.13    | + |
| chr1 | 6974062 | 6974124 | CSAR_peak_! | 29.69,10.02   | + |
| chr1 | 7016971 | 7017023 | CSAR_peak_! | 6.03,6.02,6.8 | + |
| chr1 | 7017425 | 7017488 | CSAR_peak_! | 9.79          | + |
| chr1 | 7017623 | 7017694 | CSAR_peak_! | 6.95          | + |
| chr1 | 7018016 | 7018063 | CSAR_peak_! | 7.27          | + |
| chr1 | 7018265 | 7018314 | CSAR_peak_! | 6.57          | + |
| chr1 | 7018364 | 7018432 | CSAR_peak_! | 6.85,9.77     | + |
| chr1 | 7018773 | 7018846 | CSAR_peak_! | 7.92,8.65     | + |
| chr1 | 7019168 | 7019218 | CSAR_peak_! | 6.45,6.21     | + |
| chr1 | 7019227 | 7019307 | CSAR_peak_! | 6.44          | + |
| chr1 | 7019984 | 7020006 | CSAR_peak_! | 8.39          | + |
| chr1 | 7066187 | 7066263 | CSAR_peak_! | 17.82         | + |
| chr1 | 7066595 | 7066683 | CSAR_peak_! | 9.58          | + |
| chr1 | 7067614 | 7067663 | CSAR_peak_! | 6.21          | + |
| chr1 | 7068796 | 7068868 | CSAR_peak_! | 6.21          | + |
| chr1 | 7070013 | 7070081 | CSAR_peak_! | 7.58,6.95     | + |
| chr1 | 7070420 | 7070540 | CSAR_peak_! | 10.83,6.03    | + |
| chr1 | 7071060 | 7071108 | CSAR_peak_! | 6.95          | + |
| chr1 | 7071196 | 7071301 | CSAR_peak_! | 17.82,11.14,  | + |
| chr1 | 7143259 | 7143351 | CSAR_peak_! | 17.82,7.34    | + |
| chr1 | 7143612 | 7143651 | CSAR_peak_! | 6.21          | + |
| chr1 | 7143807 | 7143892 | CSAR_peak_! | 13.48,7.58    | + |
| chr1 | 7143978 | 7144032 | CSAR_peak_! | 6.44          | + |
| chr1 | 7144044 | 7144085 | CSAR_peak_! | 7.27          | + |
| chr1 | 7144089 | 7144257 | CSAR_peak_! | 14.76,10.96,  | + |
| chr1 | 7144262 | 7144468 | CSAR_peak_! | 13.44,10.96,  | + |
| chr1 | 7144631 | 7144686 | CSAR_peak_! | 7.58          | + |
| chr1 | 7144693 | 7144737 | CSAR_peak_! | 8.34          | + |

|      |         |         |             |               |   |
|------|---------|---------|-------------|---------------|---|
| chr1 | 7144804 | 7144854 | CSAR_peak_! | 6.74          | + |
| chr1 | 7145178 | 7145190 | CSAR_peak_! | 6.22          | + |
| chr1 | 7145250 | 7145289 | CSAR_peak_! | 7.4           | + |
| chr1 | 7145553 | 7145623 | CSAR_peak_! | 19.18,6.54    | + |
| chr1 | 7145691 | 7145781 | CSAR_peak_! | 8.65,16.6     | + |
| chr1 | 7145845 | 7145915 | CSAR_peak_! | 6.03,9.58,8.3 | + |
| chr1 | 7145982 | 7146038 | CSAR_peak_! | 9.43          | + |
| chr1 | 7146043 | 7146137 | CSAR_peak_! | 9.27,7.36     | + |
| chr1 | 7146192 | 7146291 | CSAR_peak_! | 9.72,6.95     | + |
| chr1 | 7146752 | 7146827 | CSAR_peak_! | 10.83         | + |
| chr1 | 7146937 | 7146976 | CSAR_peak_! | 6.21          | + |
| chr1 | 7147348 | 7147610 | CSAR_peak_! | 12.31,12.31,  | + |
| chr1 | 7147703 | 7147842 | CSAR_peak_! | 9.77,10.83,8. | + |
| chr1 | 7147988 | 7148061 | CSAR_peak_! | 6.57,8.13     | + |
| chr1 | 7148232 | 7148398 | CSAR_peak_! | 8.39,9.77,8.3 | + |
| chr1 | 7148436 | 7148670 | CSAR_peak_! | 7.47,7.92,14. | + |
| chr1 | 7148717 | 7148818 | CSAR_peak_! | 26.69,5.9     | + |
| chr1 | 7148979 | 7149061 | CSAR_peak_! | 12.17,9.31    | + |
| chr1 | 7149106 | 7149214 | CSAR_peak_! | 8.61,10.52,1. | + |
| chr1 | 7149258 | 7149297 | CSAR_peak_! | 8.39,6.57     | + |
| chr1 | 7149317 | 7149401 | CSAR_peak_! | 11.99,7.51    | + |
| chr1 | 7149440 | 7149655 | CSAR_peak_! | 9.27,10.58,1. | + |
| chr1 | 7177073 | 7177120 | CSAR_peak_! | 7.27          | + |
| chr1 | 7177191 | 7177439 | CSAR_peak_! | 8.39,6.57,10. | + |
| chr1 | 7177481 | 7177512 | CSAR_peak_! | 7.27          | + |
| chr1 | 7177623 | 7177697 | CSAR_peak_! | 12.17         | + |
| chr1 | 7177732 | 7177868 | CSAR_peak_! | 18.95,16.05,  | + |
| chr1 | 7177893 | 7178136 | CSAR_peak_! | 14.88,7.36,6. | + |
| chr1 | 7178138 | 7178424 | CSAR_peak_! | 67.25,8.65,2. | + |
| chr1 | 7178437 | 7178489 | CSAR_peak_! | 8.39,16,11.0. | + |
| chr1 | 7179618 | 7179626 | CSAR_peak_! | 8.95          | + |
| chr1 | 7179794 | 7179886 | CSAR_peak_! | 16.77,8.28,1. | + |
| chr1 | 7179905 | 7180003 | CSAR_peak_! | 8.39,10.95    | + |
| chr1 | 7180034 | 7180085 | CSAR_peak_! | 6.87,7.27     | + |
| chr1 | 7180270 | 7180440 | CSAR_peak_! | 8.39,17.51,6. | + |
| chr1 | 7180467 | 7180676 | CSAR_peak_! | 34.09,13.44,  | + |
| chr1 | 7180694 | 7180760 | CSAR_peak_! | 14.79         | + |
| chr1 | 7180912 | 7181087 | CSAR_peak_! | 48.06,8.39,5. | + |
| chr1 | 7181099 | 7181211 | CSAR_peak_! | 30.21,14.88,  | + |
| chr1 | 7181222 | 7181241 | CSAR_peak_! | 8.39          | + |
| chr1 | 7181355 | 7181413 | CSAR_peak_! | 19.96         | + |
| chr1 | 7182268 | 7182319 | CSAR_peak_! | 6.21          | + |

|      |         |         |                          |       |   |
|------|---------|---------|--------------------------|-------|---|
| chr1 | 7183444 | 7183492 | CSAR_peak_!              | 8.39  | + |
| chr1 | 7213226 | 7213269 | CSAR_peak_!              | 7.34  | + |
| chr1 | 7214183 | 7214248 | CSAR_peak_!              | 9.27  | + |
| chr1 | 7233138 | 7233192 | CSAR_peak_(7.27,6.95     |       | + |
| chr1 | 7239179 | 7239247 | CSAR_peak_(              | 10.83 | + |
| chr1 | 7273165 | 7273207 | CSAR_peak_(              | 7.27  | + |
| chr1 | 7275634 | 7275731 | CSAR_peak_(8.39,8.95     |       | + |
| chr1 | 7285289 | 7285359 | CSAR_peak_(9.58,8.39     |       | + |
| chr1 | 7285374 | 7285754 | CSAR_peak_(11.14,23.49,! |       | + |
| chr1 | 7285788 | 7286497 | CSAR_peak_(11.14,21.56,! |       | + |
| chr1 | 7286507 | 7286648 | CSAR_peak_(6.03,19.36,7. |       | + |
| chr1 | 7286677 | 7286804 | CSAR_peak_(13.48,13.8.1! |       | + |
| chr1 | 7287224 | 7287317 | CSAR_peak_(              | 6.21  | + |
| chr1 | 7287597 | 7287633 | CSAR_peak_(              | 6.21  | + |
| chr1 | 7287813 | 7287919 | CSAR_peak_(14.88,6.03    |       | + |
| chr1 | 7287925 | 7287970 | CSAR_peak_!              | 7.13  | + |
| chr1 | 7288101 | 7288191 | CSAR_peak_!              | 9.27  | + |
| chr1 | 7288192 | 7288275 | CSAR_peak_(              | 6.57  | + |
| chr1 | 7288667 | 7288745 | CSAR_peak_(13.48,9.58    |       | + |
| chr1 | 7289243 | 7289296 | CSAR_peak_(              | 7.27  | + |
| chr1 | 7317396 | 7317442 | CSAR_peak_!              | 10.02 | + |
| chr1 | 7317805 | 7317863 | CSAR_peak_(              | 6.57  | + |
| chr1 | 7325166 | 7325257 | CSAR_peak_(6.12,6.21,10. |       | + |
| chr1 | 7325271 | 7325345 | CSAR_peak_!              | 6.94  | + |
| chr1 | 7325366 | 7325434 | CSAR_peak_(12.13,6.21    |       | + |
| chr1 | 7325644 | 7325733 | CSAR_peak_!              | 11.96 | + |
| chr1 | 7327043 | 7327107 | CSAR_peak_(16.33,8.65,6. |       | + |
| chr1 | 7327240 | 7327298 | CSAR_peak_(8.39,8.39     |       | + |
| chr1 | 7327471 | 7327527 | CSAR_peak_(6.57,17.51    |       | + |
| chr1 | 7337811 | 7337922 | CSAR_peak_(12.27,9.41,7. |       | + |
| chr1 | 7337983 | 7338029 | CSAR_peak_(14.99,8.7     |       | + |
| chr1 | 7338164 | 7338179 | CSAR_peak_!              | 7.58  | + |
| chr1 | 7338248 | 7338539 | CSAR_peak_(6.44,6.95,14. |       | + |
| chr1 | 7338660 | 7338784 | CSAR_peak_(9.77,23.49,1! |       | + |
| chr1 | 7338892 | 7338960 | CSAR_peak_(7.92,16.11    |       | + |
| chr1 | 7339312 | 7339364 | CSAR_peak_(              | 9.58  | + |
| chr1 | 7339552 | 7339626 | CSAR_peak_(              | 7.27  | + |
| chr1 | 7340238 | 7340296 | CSAR_peak_(6.21,8.39     |       | + |
| chr1 | 7374819 | 7374883 | CSAR_peak_(6.95,6.57     |       | + |
| chr1 | 7375325 | 7375363 | CSAR_peak_!              | 9.58  | + |
| chr1 | 7386723 | 7386774 | CSAR_peak_(              | 8.39  | + |
| chr1 | 7422660 | 7422777 | CSAR_peak_(16.11,5.62    |       | + |

|      |         |         |            |               |   |
|------|---------|---------|------------|---------------|---|
| chr1 | 7482913 | 7482961 | CSAR_peak_ | 6.21          | + |
| chr1 | 7493654 | 7493726 | CSAR_peak_ | 11.45,7.31    | + |
| chr1 | 7494523 | 7494852 | CSAR_peak_ | 14.76,7.27,6. | + |
| chr1 | 7494875 | 7494949 | CSAR_peak_ | 8.39,13.09    | + |
| chr1 | 7495182 | 7495278 | CSAR_peak_ | 9.49,6.57     | + |
| chr1 | 7495315 | 7495379 | CSAR_peak_ | 6.85          | + |
| chr1 | 7495400 | 7495478 | CSAR_peak_ | 11.28,12.35   | + |
| chr1 | 7495529 | 7495596 | CSAR_peak_ | 5.62,7.27,10. | + |
| chr1 | 7495630 | 7495712 | CSAR_peak_ | 10.94,5.7,6.6 | + |
| chr1 | 7495921 | 7496038 | CSAR_peak_ | 18.2,12.76,1. | + |
| chr1 | 7496117 | 7496151 | CSAR_peak_ | 6.57          | + |
| chr1 | 7496310 | 7496479 | CSAR_peak_ | 7.31,5.79     | + |
| chr1 | 7497192 | 7497233 | CSAR_peak_ | 9.54          | + |
| chr1 | 7497447 | 7497527 | CSAR_peak_ | 7.27,13.66    | + |
| chr1 | 7498507 | 7498601 | CSAR_peak_ | 23.95,6.32,2. | + |
| chr1 | 7498698 | 7498713 | CSAR_peak_ | 8.12,18.95    | + |
| chr1 | 7499013 | 7499034 | CSAR_peak_ | 6.21          | + |
| chr1 | 7499078 | 7499215 | CSAR_peak_ | 15,8.65       | + |
| chr1 | 7509749 | 7509788 | CSAR_peak_ | 8.39          | + |
| chr1 | 7510225 | 7510307 | CSAR_peak_ | 12.13,6.21    | + |
| chr1 | 7511280 | 7511327 | CSAR_peak_ | 7.29,5.62     | + |
| chr1 | 7574167 | 7574250 | CSAR_peak_ | 10.83         | + |
| chr1 | 7575250 | 7575285 | CSAR_peak_ | 6.57          | + |
| chr1 | 7576630 | 7576667 | CSAR_peak_ | 6.57          | + |
| chr1 | 7577221 | 7577294 | CSAR_peak_ | 9.61,6.44     | + |
| chr1 | 7577644 | 7577748 | CSAR_peak_ | 6.45,6.57     | + |
| chr1 | 7578084 | 7578110 | CSAR_peak_ | 8.65          | + |
| chr1 | 7578112 | 7578163 | CSAR_peak_ | 13.51         | + |
| chr1 | 7578615 | 7578666 | CSAR_peak_ | 8.39          | + |
| chr1 | 7582287 | 7582339 | CSAR_peak_ | 6.21          | + |
| chr1 | 7583407 | 7583462 | CSAR_peak_ | 7.36          | + |
| chr1 | 7583910 | 7583969 | CSAR_peak_ | 8.39,10.83    | + |
| chr1 | 7584695 | 7584745 | CSAR_peak_ | 6.21          | + |
| chr1 | 7585044 | 7585091 | CSAR_peak_ | 30.21,14.08   | + |
| chr1 | 7585176 | 7585244 | CSAR_peak_ | 9.32,7.77     | + |
| chr1 | 7585394 | 7585429 | CSAR_peak_ | 6.21          | + |
| chr1 | 7586431 | 7586464 | CSAR_peak_ | 8.39          | + |
| chr1 | 7605905 | 7605947 | CSAR_peak_ | 6.21          | + |
| chr1 | 7606410 | 7606504 | CSAR_peak_ | 9.58          | + |
| chr1 | 7607186 | 7607207 | CSAR_peak_ | 6.21          | + |
| chr1 | 7607523 | 7607610 | CSAR_peak_ | 11.32,6.21,1. | + |
| chr1 | 7607921 | 7607987 | CSAR_peak_ | 7.27,10.83,8. | + |



|      |         |         |            |                |   |
|------|---------|---------|------------|----------------|---|
| chr1 | 7608183 | 7608217 | CSAR_peak_ | 14.76          | + |
| chr1 | 7611035 | 7611172 | CSAR_peak_ | 8.39           | + |
| chr1 | 7612276 | 7612355 | CSAR_peak_ | 6.95,6.21      | + |
| chr1 | 7614162 | 7614201 | CSAR_peak_ | 6.21           | + |
| chr1 | 7614285 | 7614435 | CSAR_peak_ | 9.58,7.26,10.  | + |
| chr1 | 7614682 | 7614704 | CSAR_peak_ | 6.21           | + |
| chr1 | 7615040 | 7615113 | CSAR_peak_ | 8.39,13.29     | + |
| chr1 | 7615216 | 7615267 | CSAR_peak_ | 6.21           | + |
| chr1 | 7615485 | 7615530 | CSAR_peak_ | 6.21           | + |
| chr1 | 7616676 | 7616723 | CSAR_peak_ | 8.95           | + |
| chr1 | 7616846 | 7616915 | CSAR_peak_ | 6.44,5.67      | + |
| chr1 | 7616926 | 7617041 | CSAR_peak_ | 6.21,7.27      | + |
| chr1 | 7617236 | 7617278 | CSAR_peak_ | 12.13          | + |
| chr1 | 7617457 | 7617504 | CSAR_peak_ | 6.03,6.21      | + |
| chr1 | 7617578 | 7617615 | CSAR_peak_ | 9.58           | + |
| chr1 | 7633557 | 7633630 | CSAR_peak_ | 10.83          | + |
| chr1 | 7634225 | 7634345 | CSAR_peak_ | 8.39,15.76,8.  | + |
| chr1 | 7634632 | 7634692 | CSAR_peak_ | 9.58           | + |
| chr1 | 7634992 | 7635048 | CSAR_peak_ | 8.39           | + |
| chr1 | 7646590 | 7646669 | CSAR_peak_ | 8.95           | + |
| chr1 | 7646963 | 7647017 | CSAR_peak_ | 6.21           | + |
| chr1 | 7696620 | 7696682 | CSAR_peak_ | 8.39           | + |
| chr1 | 7697520 | 7697561 | CSAR_peak_ | 8.39           | + |
| chr1 | 7735484 | 7735544 | CSAR_peak_ | 6.57           | + |
| chr1 | 7755104 | 7755137 | CSAR_peak_ | 6.21           | + |
| chr1 | 7755582 | 7755655 | CSAR_peak_ | 12.13          | + |
| chr1 | 7790308 | 7790363 | CSAR_peak_ | 8.39,7.34,8.9  | + |
| chr1 | 7790522 | 7790558 | CSAR_peak_ | 6.02           | + |
| chr1 | 7791515 | 7791543 | CSAR_peak_ | 7.27           | + |
| chr1 | 7835941 | 7836020 | CSAR_peak_ | 9.58,7.27      | + |
| chr1 | 7836467 | 7836623 | CSAR_peak_ | 21.07,6.57     | + |
| chr1 | 7836778 | 7836800 | CSAR_peak_ | 7.27           | + |
| chr1 | 7836806 | 7837060 | CSAR_peak_ | 13.48,17.82,6. | + |
| chr1 | 7837226 | 7837315 | CSAR_peak_ | 6.21,7.27      | + |
| chr1 | 7874761 | 7874848 | CSAR_peak_ | 8.39           | + |
| chr1 | 7875024 | 7875100 | CSAR_peak_ | 13.44,12.31,6. | + |
| chr1 | 7875163 | 7875236 | CSAR_peak_ | 8.65           | + |
| chr1 | 7875237 | 7875271 | CSAR_peak_ | 6.03           | + |
| chr1 | 7875353 | 7875403 | CSAR_peak_ | 8.95           | + |
| chr1 | 7887010 | 7887075 | CSAR_peak_ | 14.88          | + |
| chr1 | 7889149 | 7889208 | CSAR_peak_ | 9.58           | + |
| chr1 | 7919231 | 7919274 | CSAR_peak_ | 6.21           | + |

|      |         |         |                           |         |
|------|---------|---------|---------------------------|---------|
| chr1 | 7919509 | 7919565 | CSAR_peak_(8.95,8.39      | +       |
| chr1 | 7919741 | 7919758 | CSAR_peak_(               | 6.03 +  |
| chr1 | 7919938 | 7919990 | CSAR_peak_(               | 6.21 +  |
| chr1 | 7920167 | 7920218 | CSAR_peak_(               | 7.34 +  |
| chr1 | 7920230 | 7920267 | CSAR_peak_(               | 13.81 + |
| chr1 | 7920423 | 7920487 | CSAR_peak_(               | 16.11 + |
| chr1 | 7921064 | 7921095 | CSAR_peak_(               | 10.02 + |
| chr1 | 7923263 | 7923302 | CSAR_peak_(               | 7.27 +  |
| chr1 | 7923444 | 7923532 | CSAR_peak_(8.13,20.18,7.+ |         |
| chr1 | 7923650 | 7923672 | CSAR_peak_(               | 9.77 +  |
| chr1 | 7925439 | 7925478 | CSAR_peak_(               | 7.27 +  |
| chr1 | 7926217 | 7926262 | CSAR_peak_(               | 9.27 +  |
| chr1 | 7981831 | 7981875 | CSAR_peak_(               | 8.95 +  |
| chr1 | 7996041 | 7996088 | CSAR_peak_(               | 7.27 +  |
| chr1 | 8048476 | 8048540 | CSAR_peak_(               | 7.58 +  |
| chr1 | 8049247 | 8049300 | CSAR_peak_(13.66,8.28,7.+ |         |
| chr1 | 8049552 | 8049637 | CSAR_peak_(7.58,14.76,7.+ |         |
| chr1 | 8049718 | 8049787 | CSAR_peak_(14.88,10.83,(+ |         |
| chr1 | 8049927 | 8049975 | CSAR_peak_(               | 6.03 +  |
| chr1 | 8050021 | 8050062 | CSAR_peak_(               | 13.51 + |
| chr1 | 8050145 | 8050191 | CSAR_peak_(               | 12.98 + |
| chr1 | 8050243 | 8050291 | CSAR_peak_(6.95,8.39      | +       |
| chr1 | 8050437 | 8050488 | CSAR_peak_(7.92,9.58      | +       |
| chr1 | 8051304 | 8051362 | CSAR_peak_(               | 8.95 +  |
| chr1 | 8051514 | 8051554 | CSAR_peak_(               | 7.34 +  |
| chr1 | 8051765 | 8051826 | CSAR_peak_(               | 10.02 + |
| chr1 | 8052233 | 8052340 | CSAR_peak_(11.28,8.65,7.+ |         |
| chr1 | 8062219 | 8062339 | CSAR_peak_(12.13,8.39,8.+ |         |
| chr1 | 8062351 | 8062468 | CSAR_peak_(8.39,8.65      | +       |
| chr1 | 8062626 | 8062698 | CSAR_peak_(               | 11.38 + |
| chr1 | 8062776 | 8062786 | CSAR_peak_(               | 6.21 +  |
| chr1 | 8062903 | 8062919 | CSAR_peak_(               | 13.44 + |
| chr1 | 8062986 | 8063048 | CSAR_peak_(               | 29 +    |
| chr1 | 8063063 | 8063174 | CSAR_peak_(               | 9.58 +  |
| chr1 | 8063240 | 8063299 | CSAR_peak_(6.57,7.27      | +       |
| chr1 | 8063342 | 8063431 | CSAR_peak_(25.62,9.58,6.+ |         |
| chr1 | 8063461 | 8063483 | CSAR_peak_(               | 6.57 +  |
| chr1 | 8063572 | 8063619 | CSAR_peak_(8.39,7.27      | +       |
| chr1 | 8063839 | 8063884 | CSAR_peak_(               | 6.85 +  |
| chr1 | 8064000 | 8064084 | CSAR_peak_(               | 10.83 + |
| chr1 | 8064121 | 8064161 | CSAR_peak_(               | 12.13 + |
| chr1 | 8064426 | 8064497 | CSAR_peak_(13.51,12.13    | +       |

|      |         |         |            |               |   |
|------|---------|---------|------------|---------------|---|
| chr1 | 8064854 | 8064925 | CSAR_peak_ | 7.58          | + |
| chr1 | 8065110 | 8065182 | CSAR_peak_ | 12.13,7.92    | + |
| chr1 | 8065184 | 8065246 | CSAR_peak_ | 7.27          | + |
| chr1 | 8065313 | 8065375 | CSAR_peak_ | 6.21          | + |
| chr1 | 8065676 | 8065810 | CSAR_peak_ | 9.58,7.92,8.6 | + |
| chr1 | 8066060 | 8066146 | CSAR_peak_ | 10.02,16.33,1 | + |
| chr1 | 8066242 | 8066311 | CSAR_peak_ | 13.48         | + |
| chr1 | 8066345 | 8066399 | CSAR_peak_ | 8.39          | + |
| chr1 | 8066539 | 8066611 | CSAR_peak_ | 14.76         | + |
| chr1 | 8066661 | 8066730 | CSAR_peak_ | 11.14         | + |
| chr1 | 8066769 | 8066822 | CSAR_peak_ | 9.77          | + |
| chr1 | 8066973 | 8067016 | CSAR_peak_ | 12.13,6.57    | + |
| chr1 | 8067194 | 8067285 | CSAR_peak_ | 7.27          | + |
| chr1 | 8067320 | 8067366 | CSAR_peak_ | 6.21          | + |
| chr1 | 8068288 | 8068338 | CSAR_peak_ | 10.02,6.52    | + |
| chr1 | 8068603 | 8068643 | CSAR_peak_ | 6.57          | + |
| chr1 | 8069058 | 8069095 | CSAR_peak_ | 8.39          | + |
| chr1 | 8070740 | 8070852 | CSAR_peak_ | 6.44,5.62     | + |
| chr1 | 8085345 | 8085356 | CSAR_peak_ | 7.27          | + |
| chr1 | 8086412 | 8086467 | CSAR_peak_ | 7.58          | + |
| chr1 | 8087354 | 8087397 | CSAR_peak_ | 7.27          | + |
| chr1 | 8102152 | 8102218 | CSAR_peak_ | 10.83         | + |
| chr1 | 8105867 | 8105917 | CSAR_peak_ | 7.92          | + |
| chr1 | 8107291 | 8107350 | CSAR_peak_ | 9.58          | + |
| chr1 | 8117443 | 8117513 | CSAR_peak_ | 8.95          | + |
| chr1 | 8117582 | 8117607 | CSAR_peak_ | 7.27          | + |
| chr1 | 8117745 | 8118204 | CSAR_peak_ | 7.58,36.01,9. | + |
| chr1 | 8118426 | 8118469 | CSAR_peak_ | 14.15,6.53,1  | + |
| chr1 | 8118554 | 8118579 | CSAR_peak_ | 13.48         | + |
| chr1 | 8118614 | 8118649 | CSAR_peak_ | 6.21          | + |
| chr1 | 8118718 | 8118756 | CSAR_peak_ | 5.62          | + |
| chr1 | 8119199 | 8119257 | CSAR_peak_ | 7.34          | + |
| chr1 | 8119283 | 8119418 | CSAR_peak_ | 6.37,15       | + |
| chr1 | 8119570 | 8119626 | CSAR_peak_ | 8.09          | + |
| chr1 | 8119979 | 8120013 | CSAR_peak_ | 17.02,8.44    | + |
| chr1 | 8120085 | 8120139 | CSAR_peak_ | 10.95,13.32   | + |
| chr1 | 8120201 | 8120287 | CSAR_peak_ | 10.29,8.5     | + |
| chr1 | 8120401 | 8120429 | CSAR_peak_ | 8.28          | + |
| chr1 | 8120504 | 8120545 | CSAR_peak_ | 10.95         | + |
| chr1 | 8120565 | 8120627 | CSAR_peak_ | 9.58,11.66,1  | + |
| chr1 | 8120739 | 8120815 | CSAR_peak_ | 20.76         | + |
| chr1 | 8121027 | 8121086 | CSAR_peak_ | 27.61,19.36   | + |

|      |         |         |             |                                             |   |
|------|---------|---------|-------------|---------------------------------------------|---|
| chr1 | 8121163 | 8121171 | CSAR_peak_1 | 6.85,8.65                                   | + |
| chr1 | 8121291 | 8121355 | CSAR_peak_1 | 7.27,14.88                                  | + |
| chr1 | 8121417 | 8121455 | CSAR_peak_1 | 8.65                                        | + |
| chr1 | 8121492 | 8121640 | CSAR_peak_1 | 13.44                                       | + |
| chr1 | 8121663 | 8121747 | CSAR_peak_1 | 28.38,9.25                                  | + |
| chr1 | 8223447 | 8223491 | CSAR_peak_1 | 7.27                                        | + |
| chr1 | 8263032 | 8263092 | CSAR_peak_1 | 6.94                                        | + |
| chr1 | 8323466 | 8323569 | CSAR_peak_1 | 12.13,10.02                                 | + |
| chr1 | 8323953 | 8324002 | CSAR_peak_1 | 6.21                                        | + |
| chr1 | 8327485 | 8327539 | CSAR_peak_1 | 6.21                                        | + |
| chr1 | 8328749 | 8328788 | CSAR_peak_1 | 8.39,6.21                                   | + |
| chr1 | 8336775 | 8336841 | CSAR_peak_1 | 13.51,14.15,10.83                           | + |
| chr1 | 8336866 | 8336942 | CSAR_peak_1 | 10.83                                       | + |
| chr1 | 8337138 | 8337268 | CSAR_peak_1 | 25.91,9.03,21.07,7.12,21.07,7.12,21.07,7.12 | + |
| chr1 | 8337327 | 8337392 | CSAR_peak_1 | 21.07,7.12,21.07,7.12                       | + |
| chr1 | 8337446 | 8337603 | CSAR_peak_1 | 17.37,22.52,17.37,22.52                     | + |
| chr1 | 8337650 | 8337775 | CSAR_peak_1 | 28.62,13.44,28.62,13.44                     | + |
| chr1 | 8337802 | 8338029 | CSAR_peak_1 | 43.32,28.96,43.32,28.96                     | + |
| chr1 | 8338122 | 8338218 | CSAR_peak_1 | 8.65,12.54,8.65,12.54                       | + |
| chr1 | 8338224 | 8338426 | CSAR_peak_1 | 6.14,7.87,21.07,7.12                        | + |
| chr1 | 8338452 | 8338491 | CSAR_peak_1 | 6.1                                         | + |
| chr1 | 8338522 | 8338545 | CSAR_peak_1 | 8.52                                        | + |
| chr1 | 8338748 | 8338781 | CSAR_peak_1 | 6.1,7.27                                    | + |
| chr1 | 8338993 | 8339100 | CSAR_peak_1 | 8.39,8.39                                   | + |
| chr1 | 8340130 | 8340165 | CSAR_peak_1 | 6.03                                        | + |
| chr1 | 8340421 | 8340489 | CSAR_peak_1 | 8.39                                        | + |
| chr1 | 8371021 | 8371065 | CSAR_peak_1 | 7.34                                        | + |
| chr1 | 8385791 | 8385803 | CSAR_peak_1 | 7.27                                        | + |
| chr1 | 8421835 | 8421892 | CSAR_peak_1 | 12.31                                       | + |
| chr1 | 8422713 | 8422777 | CSAR_peak_1 | 9.77                                        | + |
| chr1 | 8432277 | 8432333 | CSAR_peak_1 | 17.82,5.62                                  | + |
| chr1 | 8432407 | 8432481 | CSAR_peak_1 | 8.39,6.21                                   | + |
| chr1 | 8432621 | 8432665 | CSAR_peak_1 | 10.83                                       | + |
| chr1 | 8432709 | 8432811 | CSAR_peak_1 | 6.21                                        | + |
| chr1 | 8432882 | 8432950 | CSAR_peak_1 | 12.13                                       | + |
| chr1 | 8433177 | 8433260 | CSAR_peak_1 | 12.17,7.27                                  | + |
| chr1 | 8433281 | 8433329 | CSAR_peak_1 | 8.39                                        | + |
| chr1 | 8433621 | 8433731 | CSAR_peak_1 | 7.27,19.36                                  | + |
| chr1 | 8433838 | 8433870 | CSAR_peak_1 | 6.31                                        | + |
| chr1 | 8433992 | 8434067 | CSAR_peak_1 | 13.48,7.92                                  | + |
| chr1 | 8434206 | 8434398 | CSAR_peak_1 | 11.14,6.85,5.62                             | + |
| chr1 | 8434568 | 8434694 | CSAR_peak_1 | 13.92,29.36,13.92,29.36                     | + |

|      |         |         |             |               |   |
|------|---------|---------|-------------|---------------|---|
| chr1 | 8434737 | 8434777 | CSAR_peak_1 | 8.39          | + |
| chr1 | 8434796 | 8434849 | CSAR_peak_1 | 7.63          | + |
| chr1 | 8434959 | 8435043 | CSAR_peak_1 | 6.21,23.89    | + |
| chr1 | 8435081 | 8435137 | CSAR_peak_1 | 8.39,8.65,6.5 | + |
| chr1 | 8435154 | 8435226 | CSAR_peak_1 | 12.72         | + |
| chr1 | 8435250 | 8435344 | CSAR_peak_1 | 17.35,14.88   | + |
| chr1 | 8437164 | 8437322 | CSAR_peak_1 | 8.39,13.44,9. | + |
| chr1 | 8439498 | 8439540 | CSAR_peak_1 | 6.57          | + |
| chr1 | 8440326 | 8440371 | CSAR_peak_1 | 6.21          | + |
| chr1 | 8441718 | 8441801 | CSAR_peak_1 | 9.58          | + |
| chr1 | 8443628 | 8443686 | CSAR_peak_1 | 8.39          | + |
| chr1 | 8444053 | 8444108 | CSAR_peak_1 | 6.95          | + |
| chr1 | 8444943 | 8445002 | CSAR_peak_1 | 7.92          | + |
| chr1 | 8445096 | 8445166 | CSAR_peak_1 | 7.27          | + |
| chr1 | 8631626 | 8631773 | CSAR_peak_1 | 13.48,10.95,  | + |
| chr1 | 8632269 | 8632373 | CSAR_peak_1 | 14.88,7.27    | + |
| chr1 | 8632528 | 8632571 | CSAR_peak_1 | 13.48         | + |
| chr1 | 8632709 | 8632752 | CSAR_peak_1 | 13.48         | + |
| chr1 | 8632790 | 8632879 | CSAR_peak_1 | 7.78          | + |
| chr1 | 8633098 | 8633143 | CSAR_peak_1 | 6.57,8.39     | + |
| chr1 | 8633503 | 8633767 | CSAR_peak_1 | 11.39,7.34,1. | + |
| chr1 | 8634395 | 8634540 | CSAR_peak_1 | 14.88,6.21    | + |
| chr1 | 8634572 | 8634707 | CSAR_peak_1 | 8.39,6.21     | + |
| chr1 | 8636288 | 8636357 | CSAR_peak_1 | 7.92          | + |
| chr1 | 8636424 | 8636471 | CSAR_peak_1 | 6.03          | + |
| chr1 | 8636897 | 8636952 | CSAR_peak_1 | 6.57          | + |
| chr1 | 8637002 | 8637124 | CSAR_peak_1 | 6.12,6.22,7.5 | + |
| chr1 | 8637969 | 8638028 | CSAR_peak_1 | 6.21          | + |
| chr1 | 8643077 | 8643125 | CSAR_peak_1 | 6.21          | + |
| chr1 | 8662378 | 8662420 | CSAR_peak_1 | 8.39,8.39     | + |
| chr1 | 8662897 | 8662936 | CSAR_peak_1 | 6.21          | + |
| chr1 | 8663193 | 8663246 | CSAR_peak_1 | 13.51         | + |
| chr1 | 8667100 | 8667158 | CSAR_peak_1 | 10.83,8.39    | + |
| chr1 | 8668024 | 8668084 | CSAR_peak_1 | 5.62,6.44     | + |
| chr1 | 8705550 | 8705626 | CSAR_peak_1 | 14.88         | + |
| chr1 | 8742496 | 8742567 | CSAR_peak_1 | 6.94,12.17    | + |
| chr1 | 8744677 | 8744725 | CSAR_peak_1 | 10.95,11.14   | + |
| chr1 | 8744831 | 8744877 | CSAR_peak_1 | 12.17         | + |
| chr1 | 8745782 | 8745850 | CSAR_peak_1 | 10.62         | + |
| chr1 | 8746816 | 8746860 | CSAR_peak_1 | 13.48         | + |
| chr1 | 8747014 | 8747020 | CSAR_peak_1 | 8.39          | + |
| chr1 | 8747164 | 8747219 | CSAR_peak_1 | 7.27          | + |

|      |         |         |             |               |   |
|------|---------|---------|-------------|---------------|---|
| chr1 | 8747607 | 8747688 | CSAR_peak_1 | 13.51,6.22    | + |
| chr1 | 8747777 | 8747805 | CSAR_peak_1 | 13.66         | + |
| chr1 | 8748603 | 8748636 | CSAR_peak_1 | 6.21          | + |
| chr1 | 8749471 | 8749542 | CSAR_peak_1 | 8.65,7.58     | + |
| chr1 | 8751570 | 8751628 | CSAR_peak_1 | 8.39          | + |
| chr1 | 8752217 | 8752279 | CSAR_peak_1 | 8.39,7.58,6.2 | + |
| chr1 | 8752526 | 8752579 | CSAR_peak_1 | 8.39          | + |
| chr1 | 8752822 | 8752902 | CSAR_peak_1 | 6.03,17.68    | + |
| chr1 | 8753769 | 8753857 | CSAR_peak_1 | 7.27          | + |
| chr1 | 8754346 | 8754476 | CSAR_peak_1 | 6.03,12.31,6. | + |
| chr1 | 8755173 | 8755259 | CSAR_peak_1 | 6.21,14.76    | + |
| chr1 | 8775999 | 8776053 | CSAR_peak_1 | 6.03          | + |
| chr1 | 8777107 | 8777182 | CSAR_peak_1 | 6.05          | + |
| chr1 | 8798527 | 8798680 | CSAR_peak_1 | 9.97,10.95,1. | + |
| chr1 | 8799635 | 8799710 | CSAR_peak_1 | 6.05          | + |
| chr1 | 8812905 | 8813058 | CSAR_peak_1 | 10.62,10.95,. | + |
| chr1 | 8813192 | 8813322 | CSAR_peak_1 | 13.85,6.85,5. | + |
| chr1 | 8813491 | 8813628 | CSAR_peak_1 | 8.39,16.33,6. | + |
| chr1 | 8813668 | 8813788 | CSAR_peak_1 | 17.19,27.17   | + |
| chr1 | 8814013 | 8814088 | CSAR_peak_1 | 6.05          | + |
| chr1 | 8814312 | 8814386 | CSAR_peak_1 | 7.27,7.73     | + |
| chr1 | 8817919 | 8818025 | CSAR_peak_1 | 12.13,6.44,5. | + |
| chr1 | 8818119 | 8818290 | CSAR_peak_1 | 7.27,10.95,6. | + |
| chr1 | 8827293 | 8827436 | CSAR_peak_1 | 9.27,10.95,1. | + |
| chr1 | 8828391 | 8828466 | CSAR_peak_1 | 6.05          | + |
| chr1 | 8860684 | 8860712 | CSAR_peak_1 | 6.36          | + |
| chr1 | 8860749 | 8860865 | CSAR_peak_1 | 16.77,31.73,( | + |
| chr1 | 8860933 | 8861149 | CSAR_peak_1 | 5.62,19.36,1( | + |
| chr1 | 8861211 | 8861269 | CSAR_peak_1 | 7.27          | + |
| chr1 | 8861735 | 8861795 | CSAR_peak_1 | 9.77,10.83    | + |
| chr1 | 8865185 | 8865237 | CSAR_peak_1 | 6.21          | + |
| chr1 | 8866349 | 8866399 | CSAR_peak_1 | 7.27          | + |
| chr1 | 8952252 | 8952301 | CSAR_peak_1 | 6.21          | + |
| chr1 | 8963259 | 8963305 | CSAR_peak_1 | 7.73          | + |
| chr1 | 8976866 | 8976938 | CSAR_peak_1 | 9.79,6.21     | + |
| chr1 | 8976940 | 8976991 | CSAR_peak_1 | 6.21          | + |
| chr1 | 8977000 | 8977139 | CSAR_peak_1 | 9.84,16.22    | + |
| chr1 | 8977267 | 8977442 | CSAR_peak_1 | 9.58,13.51,8. | + |
| chr1 | 9021659 | 9021715 | CSAR_peak_1 | 6.21,7.27     | + |
| chr1 | 9185334 | 9185392 | CSAR_peak_1 | 8.39          | + |
| chr1 | 9186152 | 9186206 | CSAR_peak_1 | 7.27          | + |
| chr1 | 9186305 | 9186450 | CSAR_peak_1 | 9.97,9.77,28. | + |

|      |         |         |            |                  |   |
|------|---------|---------|------------|------------------|---|
| chr1 | 9186526 | 9186575 | CSAR_peak_ | 16.33            | + |
| chr1 | 9186814 | 9186983 | CSAR_peak_ | 16.33            | + |
| chr1 | 9187178 | 9187221 | CSAR_peak_ | 8.39             | + |
| chr1 | 9205951 | 9205986 | CSAR_peak_ | 8.28             | + |
| chr1 | 9296986 | 9297072 | CSAR_peak_ | 6.21             | + |
| chr1 | 9298161 | 9298221 | CSAR_peak_ | 6.21             | + |
| chr1 | 9374245 | 9374290 | CSAR_peak_ | 6.03,6.57        | + |
| chr1 | 9374375 | 9374429 | CSAR_peak_ | 9.77,6.44        | + |
| chr1 | 9376012 | 9376067 | CSAR_peak_ | 12.13            | + |
| chr1 | 9376199 | 9376244 | CSAR_peak_ | 8.39             | + |
| chr1 | 9378778 | 9378804 | CSAR_peak_ | 6.45,9.61        | + |
| chr1 | 9378846 | 9378904 | CSAR_peak_ | 7.27             | + |
| chr1 | 9379449 | 9379556 | CSAR_peak_ | 10.33,7.27       | + |
| chr1 | 9379932 | 9380015 | CSAR_peak_ | 16.08,7.29       | + |
| chr1 | 9380016 | 9380022 | CSAR_peak_ | 6.45             | + |
| chr1 | 9380105 | 9380178 | CSAR_peak_ | 6.37             | + |
| chr1 | 9380241 | 9380268 | CSAR_peak_ | 8.65             | + |
| chr1 | 9380339 | 9380423 | CSAR_peak_ | 10.02,8.39       | + |
| chr1 | 9380503 | 9380546 | CSAR_peak_ | 14.88            | + |
| chr1 | 9382376 | 9382453 | CSAR_peak_ | 8.95,10.02,11.14 | + |
| chr1 | 9382583 | 9382622 | CSAR_peak_ | 6.95             | + |
| chr1 | 9383217 | 9383256 | CSAR_peak_ | 12.5             | + |
| chr1 | 9383622 | 9383693 | CSAR_peak_ | 15.56,5.79       | + |
| chr1 | 9425880 | 9425928 | CSAR_peak_ | 9.03,6.21        | + |
| chr1 | 9426237 | 9426326 | CSAR_peak_ | 8.95,8.65        | + |
| chr1 | 9429895 | 9429915 | CSAR_peak_ | 6.21             | + |
| chr1 | 9430558 | 9430589 | CSAR_peak_ | 8.39             | + |
| chr1 | 9481579 | 9481616 | CSAR_peak_ | 8.95             | + |
| chr1 | 9482019 | 9482256 | CSAR_peak_ | 6.85,14.34,9.58  | + |
| chr1 | 9482339 | 9482401 | CSAR_peak_ | 9.58             | + |
| chr1 | 9483052 | 9483102 | CSAR_peak_ | 8.39             | + |
| chr1 | 9483266 | 9483362 | CSAR_peak_ | 11.14,12.27      | + |
| chr1 | 9484020 | 9484058 | CSAR_peak_ | 6.57             | + |
| chr1 | 9484127 | 9484201 | CSAR_peak_ | 7.47             | + |
| chr1 | 9489707 | 9489752 | CSAR_peak_ | 7.27             | + |
| chr1 | 9490041 | 9490106 | CSAR_peak_ | 6.03             | + |
| chr1 | 9490142 | 9490210 | CSAR_peak_ | 6.21             | + |
| chr1 | 9491500 | 9491555 | CSAR_peak_ | 8.39             | + |
| chr1 | 9491776 | 9491834 | CSAR_peak_ | 7.29,5.62        | + |
| chr1 | 9515625 | 9515750 | CSAR_peak_ | 167.26,11.95     | + |
| chr1 | 9536721 | 9536786 | CSAR_peak_ | 6.57             | + |
| chr1 | 9559697 | 9559758 | CSAR_peak_ | 9.58             | + |

|      |         |         |             |               |   |
|------|---------|---------|-------------|---------------|---|
| chr1 | 9560154 | 9560208 | CSAR_peak_! | 6.21          | + |
| chr1 | 9560219 | 9560311 | CSAR_peak_! | 8.65,11.99,5. | + |
| chr1 | 9560912 | 9560953 | CSAR_peak_! | 6.21          | + |
| chr1 | 9611572 | 9611686 | CSAR_peak_! | 14.88,10.12,! | + |
| chr1 | 9613232 | 9613315 | CSAR_peak_! | 6.57          | + |
| chr1 | 9613766 | 9613806 | CSAR_peak_! | 6.21          | + |
| chr1 | 9613852 | 9613899 | CSAR_peak_! | 6.57          | + |
| chr1 | 9615704 | 9615787 | CSAR_peak_! | 5.62,7.92     | + |
| chr1 | 9659112 | 9659153 | CSAR_peak_! | 6.21          | + |
| chr1 | 9666995 | 9667069 | CSAR_peak_! | 8.39          | + |
| chr1 | 9669110 | 9669148 | CSAR_peak_! | 6.57          | + |
| chr1 | 9669328 | 9669358 | CSAR_peak_! | 7.27          | + |
| chr1 | 9669662 | 9669708 | CSAR_peak_! | 9.58          | + |
| chr1 | 9669769 | 9669813 | CSAR_peak_! | 10.83         | + |
| chr1 | 9669910 | 9670006 | CSAR_peak_! | 14.76,13.48,! | + |
| chr1 | 9670318 | 9670391 | CSAR_peak_! | 10.83         | + |
| chr1 | 9670978 | 9671018 | CSAR_peak_! | 10.83         | + |
| chr1 | 9671127 | 9671355 | CSAR_peak_! | 12.13,9.77,6. | + |
| chr1 | 9699312 | 9699361 | CSAR_peak_! | 7.92,6.21     | + |
| chr1 | 9703438 | 9703509 | CSAR_peak_! | 6.57          | + |
| chr1 | 9750195 | 9750240 | CSAR_peak_! | 7.27          | + |
| chr1 | 9750321 | 9750375 | CSAR_peak_! | 7.27          | + |
| chr1 | 9750412 | 9750474 | CSAR_peak_! | 8.52          | + |
| chr1 | 9750681 | 9750718 | CSAR_peak_! | 9.27          | + |
| chr1 | 9751740 | 9751789 | CSAR_peak_! | 8.95          | + |
| chr1 | 9752330 | 9752394 | CSAR_peak_! | 10.95         | + |
| chr1 | 9752496 | 9752523 | CSAR_peak_! | 6.95          | + |
| chr1 | 9779326 | 9779410 | CSAR_peak_! | 13.66         | + |
| chr1 | 9779952 | 9780032 | CSAR_peak_! | 8.39,6.21     | + |
| chr1 | 9780729 | 9780785 | CSAR_peak_! | 12.17,6.57,8. | + |
| chr1 | 9780882 | 9781015 | CSAR_peak_! | 14.88         | + |
| chr1 | 9781774 | 9781860 | CSAR_peak_! | 6.21,6.21     | + |
| chr1 | 9782276 | 9782341 | CSAR_peak_! | 11.14         | + |
| chr1 | 9783517 | 9783532 | CSAR_peak_! | 6.21          | + |
| chr1 | 9783533 | 9783581 | CSAR_peak_! | 6.95          | + |
| chr1 | 9804150 | 9804246 | CSAR_peak_! | 8.39          | + |
| chr1 | 9942354 | 9942405 | CSAR_peak_! | 7.58,6.45     | + |
| chr1 | 9943004 | 9943040 | CSAR_peak_! | 6.95          | + |
| chr1 | 9946468 | 9946531 | CSAR_peak_! | 7.27          | + |
| chr1 | 9949119 | 9949180 | CSAR_peak_! | 6.21          | + |
| chr1 | 9963717 | 9963784 | CSAR_peak_! | 12.13         | + |
| chr1 | 9964113 | 9964291 | CSAR_peak_! | 7.34,9.58     | + |



|      |          |          |             |                |   |
|------|----------|----------|-------------|----------------|---|
| chr1 | 9964685  | 9964764  | CSAR_peak_1 | 13.51,12.94    | + |
| chr1 | 9965368  | 9965410  | CSAR_peak_1 | 8.39           | + |
| chr1 | 9981630  | 9981682  | CSAR_peak_1 | 9.03           | + |
| chr1 | 9981690  | 9981720  | CSAR_peak_1 | 12.17          | + |
| chr1 | 9981834  | 9981883  | CSAR_peak_1 | 8.28           | + |
| chr1 | 9982117  | 9982186  | CSAR_peak_1 | 10.95          | + |
| chr1 | 9983588  | 9983610  | CSAR_peak_1 | 6.21           | + |
| chr1 | 9986766  | 9986984  | CSAR_peak_1 | 10.83,7.27,6.  | + |
| chr1 | 9987082  | 9987196  | CSAR_peak_1 | 6.03,13.44     | + |
| chr1 | 9987240  | 9987351  | CSAR_peak_1 | 6.21,6.57      | + |
| chr1 | 9998920  | 9998972  | CSAR_peak_1 | 9.58           | + |
| chr1 | 9999211  | 9999300  | CSAR_peak_1 | 7.26           | + |
| chr1 | 10029763 | 10029817 | CSAR_peak_1 | 14.88          | + |
| chr1 | 10029847 | 10029920 | CSAR_peak_1 | 9.77           | + |
| chr1 | 10031039 | 10031086 | CSAR_peak_1 | 7.27           | + |
| chr1 | 10031339 | 10031437 | CSAR_peak_1 | 5.79,7.58,13.  | + |
| chr1 | 10031642 | 10031686 | CSAR_peak_1 | 6.21           | + |
| chr1 | 10174792 | 10174851 | CSAR_peak_1 | 6.21           | + |
| chr1 | 10175602 | 10175652 | CSAR_peak_1 | 8.95,6.44      | + |
| chr1 | 10176029 | 10176072 | CSAR_peak_1 | 6.03           | + |
| chr1 | 10176866 | 10176905 | CSAR_peak_1 | 10.95,16.11    | + |
| chr1 | 10176987 | 10177032 | CSAR_peak_1 | 6.95,9.58      | + |
| chr1 | 10177123 | 10177191 | CSAR_peak_1 | 8.39,6.57      | + |
| chr1 | 10236606 | 10236675 | CSAR_peak_1 | 13.48,14.88    | + |
| chr1 | 10265061 | 10265162 | CSAR_peak_1 | 6.03,9.58      | + |
| chr1 | 10265198 | 10265277 | CSAR_peak_1 | 6.21,6.95      | + |
| chr1 | 10265970 | 10266023 | CSAR_peak_1 | 8.39,7.27      | + |
| chr1 | 10266231 | 10266330 | CSAR_peak_1 | 17.51          | + |
| chr1 | 10300356 | 10300451 | CSAR_peak_1 | 7.78,24.01,8(+ |   |
| chr1 | 10300477 | 10300572 | CSAR_peak_1 | 269.24,27.16+  |   |
| chr1 | 10300636 | 10300704 | CSAR_peak_1 | 315.35,6.9,1+  |   |
| chr1 | 10300751 | 10300789 | CSAR_peak_1 | 12.26          | + |
| chr1 | 10300891 | 10301023 | CSAR_peak_1 | 69.33,108.59+  |   |
| chr1 | 10308749 | 10308846 | CSAR_peak_1 | 44.98,7.26,2+  |   |
| chr1 | 10308873 | 10308963 | CSAR_peak_1 | 124.29,9.06,+  |   |
| chr1 | 10309010 | 10309095 | CSAR_peak_1 | 102.18,25.95+  |   |
| chr1 | 10309135 | 10309173 | CSAR_peak_1 | 12.26          | + |
| chr1 | 10331906 | 10331955 | CSAR_peak_1 | 6.03           | + |
| chr1 | 10345768 | 10345824 | CSAR_peak_1 | 10.02          | + |
| chr1 | 10372386 | 10372484 | CSAR_peak_1 | 7.73           | + |
| chr1 | 10372590 | 10372650 | CSAR_peak_1 | 12.14          | + |
| chr1 | 10373029 | 10373079 | CSAR_peak_1 | 8.39           | + |

|      |          |          |             |                  |   |
|------|----------|----------|-------------|------------------|---|
| chr1 | 10373401 | 10373468 | CSAR_peak_1 | 12.13            | + |
| chr1 | 10373612 | 10373657 | CSAR_peak_1 | 9.58             | + |
| chr1 | 10376008 | 10376087 | CSAR_peak_1 | 8.39,10.95       | + |
| chr1 | 10376187 | 10376344 | CSAR_peak_1 | 17.35,14.7,11.1  | + |
| chr1 | 10376411 | 10376543 | CSAR_peak_1 | 10.58,7.61       | + |
| chr1 | 10376572 | 10376688 | CSAR_peak_1 | 20.94,12.13      | + |
| chr1 | 10377118 | 10377172 | CSAR_peak_1 | 8.12,8.65        | + |
| chr1 | 10377346 | 10377397 | CSAR_peak_1 | 7.27,8.92        | + |
| chr1 | 10377435 | 10377493 | CSAR_peak_1 | 9.77,8.28        | + |
| chr1 | 10447826 | 10447869 | CSAR_peak_1 | 11.07,8.95,7.1   | + |
| chr1 | 10448680 | 10448746 | CSAR_peak_1 | 5.62             | + |
| chr1 | 10448846 | 10448873 | CSAR_peak_1 | 13.44            | + |
| chr1 | 10449038 | 10449070 | CSAR_peak_1 | 8.65,7.92        | + |
| chr1 | 10449427 | 10449481 | CSAR_peak_1 | 6.95,8.39        | + |
| chr1 | 10589182 | 10589233 | CSAR_peak_1 | 8.19             | + |
| chr1 | 10596510 | 10596581 | CSAR_peak_1 | 11.83            | + |
| chr1 | 10596696 | 10596757 | CSAR_peak_1 | 6.21             | + |
| chr1 | 10596845 | 10596961 | CSAR_peak_1 | 10.95,17.82      | + |
| chr1 | 10597039 | 10597083 | CSAR_peak_1 | 6.21             | + |
| chr1 | 10626260 | 10626310 | CSAR_peak_1 | 9.58             | + |
| chr1 | 10626805 | 10626872 | CSAR_peak_1 | 7.27             | + |
| chr1 | 10655452 | 10655495 | CSAR_peak_1 | 17.82,7.27       | + |
| chr1 | 10655586 | 10655649 | CSAR_peak_1 | 8.39,12.13       | + |
| chr1 | 10655687 | 10655773 | CSAR_peak_1 | 10.83            | + |
| chr1 | 10655970 | 10656018 | CSAR_peak_1 | 12.31,12.31      | + |
| chr1 | 10656104 | 10656155 | CSAR_peak_1 | 6.87             | + |
| chr1 | 10657041 | 10657083 | CSAR_peak_1 | 7.27             | + |
| chr1 | 10657741 | 10657855 | CSAR_peak_1 | 6.21,13.85       | + |
| chr1 | 10715811 | 10715851 | CSAR_peak_1 | 5.79             | + |
| chr1 | 10716065 | 10716816 | CSAR_peak_1 | 13.38,29.69,11.1 | + |
| chr1 | 10716844 | 10717363 | CSAR_peak_1 | 6.92,36.9,19.1   | + |
| chr1 | 10717421 | 10717771 | CSAR_peak_1 | 7.37,30.26,11.1  | + |
| chr1 | 10717906 | 10718139 | CSAR_peak_1 | 20.94,10.47,11.1 | + |
| chr1 | 10718222 | 10718467 | CSAR_peak_1 | 26.37,21.22,11.1 | + |
| chr1 | 10718472 | 10718520 | CSAR_peak_1 | 6.21             | + |
| chr1 | 10718530 | 10718634 | CSAR_peak_1 | 11.14,23.9       | + |
| chr1 | 10718674 | 10718778 | CSAR_peak_1 | 18.73,9.4        | + |
| chr1 | 10718810 | 10718861 | CSAR_peak_1 | 12.13            | + |
| chr1 | 10718897 | 10718966 | CSAR_peak_1 | 6.74,11.28       | + |
| chr1 | 10719090 | 10719163 | CSAR_peak_1 | 18.73,17.82      | + |
| chr1 | 10719443 | 10719572 | CSAR_peak_1 | 7.26,14.63,9.1   | + |
| chr1 | 10720133 | 10720187 | CSAR_peak_1 | 14.88,8.65       | + |

|      |          |          |             |                |   |
|------|----------|----------|-------------|----------------|---|
| chr1 | 10722270 | 10722337 | CSAR_peak_! | 13.29          | + |
| chr1 | 10722376 | 10722409 | CSAR_peak_! | 7.34           | + |
| chr1 | 10724369 | 10724491 | CSAR_peak_! | 14.76,7.7      | + |
| chr1 | 10728561 | 10728569 | CSAR_peak_! | 6.57           | + |
| chr1 | 10729066 | 10729092 | CSAR_peak_! | 7.34           | + |
| chr1 | 10729648 | 10729693 | CSAR_peak_! | 14.92,7.78,1.! | + |
| chr1 | 10729775 | 10729869 | CSAR_peak_! | 8.65,9.54,8.9  | + |
| chr1 | 10730113 | 10730138 | CSAR_peak_! | 12.74          | + |
| chr1 | 10731227 | 10731241 | CSAR_peak_! | 6.21           | + |
| chr1 | 10732023 | 10732102 | CSAR_peak_! | 7.71,16.34     | + |
| chr1 | 10732221 | 10732234 | CSAR_peak_! | 6.21           | + |
| chr1 | 10733191 | 10733324 | CSAR_peak_! | 8.39,10.02     | + |
| chr1 | 10733619 | 10733671 | CSAR_peak_! | 6.95,8.39      | + |
| chr1 | 10733991 | 10734013 | CSAR_peak_! | 7.27           | + |
| chr1 | 10734207 | 10734220 | CSAR_peak_! | 6.57           | + |
| chr1 | 10734464 | 10734543 | CSAR_peak_! | 6.21           | + |
| chr1 | 10734546 | 10734602 | CSAR_peak_! | 11.66,10.25,!  | + |
| chr1 | 10734792 | 10734879 | CSAR_peak_! | 7.34,12.17,6.  | + |
| chr1 | 10735522 | 10735562 | CSAR_peak_! | 7.27,6.57,6.2  | + |
| chr1 | 10735696 | 10735757 | CSAR_peak_! | 16.33          | + |
| chr1 | 10736326 | 10736440 | CSAR_peak_! | 7.26,7.27      | + |
| chr1 | 10737143 | 10737238 | CSAR_peak_! | 6.57,16.33     | + |
| chr1 | 10737465 | 10737507 | CSAR_peak_! | 6.87           | + |
| chr1 | 10737646 | 10737715 | CSAR_peak_! | 11.14,8.39     | + |
| chr1 | 10739589 | 10739647 | CSAR_peak_! | 8.39           | + |
| chr1 | 10740731 | 10740763 | CSAR_peak_! | 8.28,9.27      | + |
| chr1 | 10740866 | 10740910 | CSAR_peak_! | 8.65,11.66     | + |
| chr1 | 10741836 | 10741880 | CSAR_peak_! | 8.95,12.13     | + |
| chr1 | 10741971 | 10741977 | CSAR_peak_! | 6.21           | + |
| chr1 | 10743847 | 10743927 | CSAR_peak_! | 9.03,5.62      | + |
| chr1 | 10744311 | 10744427 | CSAR_peak_! | 6.21,6.21,9.5  | + |
| chr1 | 10744487 | 10744551 | CSAR_peak_! | 13.29,21.27    | + |
| chr1 | 10744721 | 10744726 | CSAR_peak_! | 8.65           | + |
| chr1 | 10745400 | 10745443 | CSAR_peak_! | 8.65           | + |
| chr1 | 10746034 | 10746115 | CSAR_peak_! | 7.58           | + |
| chr1 | 10780719 | 10780772 | CSAR_peak_! | 6.57           | + |
| chr1 | 10782075 | 10782129 | CSAR_peak_! | 7.27           | + |
| chr1 | 10782155 | 10782192 | CSAR_peak_! | 12.17          | + |
| chr1 | 10782335 | 10782347 | CSAR_peak_! | 6.57           | + |
| chr1 | 10782661 | 10782733 | CSAR_peak_! | 7.27           | + |
| chr1 | 10783388 | 10783439 | CSAR_peak_! | 12.5           | + |
| chr1 | 10784229 | 10784274 | CSAR_peak_! | 6.21           | + |

|      |          |          |            |               |   |
|------|----------|----------|------------|---------------|---|
| chr1 | 10847822 | 10847867 | CSAR_peak_ | 6.95          | + |
| chr1 | 10857477 | 10857538 | CSAR_peak_ | 6.21,6.95     | + |
| chr1 | 10861356 | 10861375 | CSAR_peak_ | 6.57          | + |
| chr1 | 10861731 | 10861866 | CSAR_peak_ | 9.58,7.92     | + |
| chr1 | 10862130 | 10862193 | CSAR_peak_ | 6.85,8.28     | + |
| chr1 | 10862423 | 10862501 | CSAR_peak_ | 16.05         | + |
| chr1 | 10862828 | 10862883 | CSAR_peak_ | 12.13         | + |
| chr1 | 10862888 | 10862964 | CSAR_peak_ | 8.39,9.61     | + |
| chr1 | 10863237 | 10863290 | CSAR_peak_ | 12.13         | + |
| chr1 | 10863446 | 10863498 | CSAR_peak_ | 10.83         | + |
| chr1 | 10863831 | 10863837 | CSAR_peak_ | 7.27          | + |
| chr1 | 10864292 | 10864342 | CSAR_peak_ | 10.18,7.61,5. | + |
| chr1 | 10888655 | 10888799 | CSAR_peak_ | 7.92,6.21     | + |
| chr1 | 11001565 | 11001621 | CSAR_peak_ | 8.65,20.13    | + |
| chr1 | 11138252 | 11138267 | CSAR_peak_ | 7.27          | + |
| chr1 | 11139314 | 11139361 | CSAR_peak_ | 6.21          | + |
| chr1 | 11139836 | 11139873 | CSAR_peak_ | 6.57          | + |
| chr1 | 11140009 | 11140069 | CSAR_peak_ | 8.28          | + |
| chr1 | 11140646 | 11140786 | CSAR_peak_ | 6.95,12.31    | + |
| chr1 | 11140886 | 11140959 | CSAR_peak_ | 7.34,7.58     | + |
| chr1 | 11141065 | 11141122 | CSAR_peak_ | 10.83         | + |
| chr1 | 11250637 | 11250686 | CSAR_peak_ | 23.49,6.45    | + |
| chr1 | 11250782 | 11250819 | CSAR_peak_ | 7.27          | + |
| chr1 | 11252202 | 11252242 | CSAR_peak_ | 13.44         | + |
| chr1 | 11252348 | 11252355 | CSAR_peak_ | 6.57          | + |
| chr1 | 11252402 | 11252451 | CSAR_peak_ | 6.03,8.95     | + |
| chr1 | 11252641 | 11252681 | CSAR_peak_ | 10.95         | + |
| chr1 | 11266603 | 11266643 | CSAR_peak_ | 6.21          | + |
| chr1 | 11266931 | 11266975 | CSAR_peak_ | 20.13         | + |
| chr1 | 11267093 | 11267156 | CSAR_peak_ | 9.27,5.62     | + |
| chr1 | 11267663 | 11267749 | CSAR_peak_ | 10.12         | + |
| chr1 | 11269598 | 11269654 | CSAR_peak_ | 9.58,6.57     | + |
| chr1 | 11270582 | 11270626 | CSAR_peak_ | 6.21          | + |
| chr1 | 11270923 | 11270987 | CSAR_peak_ | 8.5,6.87      | + |
| chr1 | 11271747 | 11271841 | CSAR_peak_ | 10.83         | + |
| chr1 | 11271924 | 11272040 | CSAR_peak_ | 10.83,8.39    | + |
| chr1 | 11311369 | 11311406 | CSAR_peak_ | 9.58          | + |
| chr1 | 11350346 | 11350396 | CSAR_peak_ | 7.27          | + |
| chr1 | 11353615 | 11353668 | CSAR_peak_ | 8.39          | + |
| chr1 | 11353743 | 11353782 | CSAR_peak_ | 13.48         | + |
| chr1 | 11354625 | 11354672 | CSAR_peak_ | 6.21          | + |
| chr1 | 11354782 | 11354828 | CSAR_peak_ | 8.39          | + |

|      |          |          |             |                |   |
|------|----------|----------|-------------|----------------|---|
| chr1 | 11361284 | 11361316 | CSAR_peak_! | 6.21           | + |
| chr1 | 11361687 | 11361706 | CSAR_peak_! | 7.27           | + |
| chr1 | 11397284 | 11397316 | CSAR_peak_! | 6.21           | + |
| chr1 | 11439533 | 11439586 | CSAR_peak_! | 13.48          | + |
| chr1 | 11454233 | 11454336 | CSAR_peak_! | 6.44,6.03      | + |
| chr1 | 11454497 | 11454564 | CSAR_peak_! | 10.31          | + |
| chr1 | 11454591 | 11454676 | CSAR_peak_! | 7.34           | + |
| chr1 | 11454813 | 11454865 | CSAR_peak_! | 5.62           | + |
| chr1 | 11458990 | 11459058 | CSAR_peak_! | 7.27,8.39      | + |
| chr1 | 11459250 | 11459311 | CSAR_peak_! | 7.92,8.39      | + |
| chr1 | 11460053 | 11460107 | CSAR_peak_! | 9.77           | + |
| chr1 | 11461345 | 11461396 | CSAR_peak_! | 8.39           | + |
| chr1 | 11466379 | 11466455 | CSAR_peak_! | 12.13          | + |
| chr1 | 11467132 | 11467178 | CSAR_peak_! | 10.02          | + |
| chr1 | 11529198 | 11529235 | CSAR_peak_! | 13.48          | + |
| chr1 | 11529313 | 11529338 | CSAR_peak_! | 13.44,7.34     | + |
| chr1 | 11532802 | 11532864 | CSAR_peak_! | 17.37          | + |
| chr1 | 11533645 | 11533696 | CSAR_peak_! | 6.21           | + |
| chr1 | 11566203 | 11566261 | CSAR_peak_! | 7.58           | + |
| chr1 | 11566993 | 11567113 | CSAR_peak_! | 8.65,10.83     | + |
| chr1 | 11567247 | 11567302 | CSAR_peak_! | 10.95,8.52     | + |
| chr1 | 11567390 | 11567421 | CSAR_peak_! | 14.76,9.77     | + |
| chr1 | 11567832 | 11567910 | CSAR_peak_! | 9.97           | + |
| chr1 | 11576227 | 11576308 | CSAR_peak_! | 7.92           | + |
| chr1 | 11577726 | 11577770 | CSAR_peak_! | 6.21           | + |
| chr1 | 11612849 | 11612861 | CSAR_peak_! | 8.39           | + |
| chr1 | 11613324 | 11613451 | CSAR_peak_! | 10.95,10.83    | + |
| chr1 | 11613517 | 11613734 | CSAR_peak_! | 16.33,18.73    | + |
| chr1 | 11613837 | 11613875 | CSAR_peak_! | 8.28           | + |
| chr1 | 11613917 | 11613963 | CSAR_peak_! | 6.44           | + |
| chr1 | 11614001 | 11614116 | CSAR_peak_! | 12.14,14.85    | + |
| chr1 | 11614118 | 11614212 | CSAR_peak_! | 14.76,7.58     | + |
| chr1 | 11614487 | 11614551 | CSAR_peak_! | 10.35,6.05,2.! | + |
| chr1 | 11614659 | 11614712 | CSAR_peak_! | 17.37,8.65     | + |
| chr1 | 11614763 | 11614893 | CSAR_peak_! | 9.97,11.96,6.! | + |
| chr1 | 11615178 | 11615237 | CSAR_peak_! | 9.58,17.4      | + |
| chr1 | 11615276 | 11615312 | CSAR_peak_! | 6.91           | + |
| chr1 | 11615402 | 11615436 | CSAR_peak_! | 8.18           | + |
| chr1 | 11615462 | 11615512 | CSAR_peak_! | 9.77           | + |
| chr1 | 11615515 | 11615561 | CSAR_peak_! | 24.71,11.64    | + |
| chr1 | 11615592 | 11615719 | CSAR_peak_! | 34.49,7.27,1!  | + |
| chr1 | 11616031 | 11616052 | CSAR_peak_! | 7.58           | + |

|      |          |          |             |                |
|------|----------|----------|-------------|----------------|
| chr1 | 11616077 | 11616184 | CSAR_peak_! | 10.83,7.27,6.+ |
| chr1 | 11616388 | 11616437 | CSAR_peak_! | 7.27 +         |
| chr1 | 11616637 | 11616765 | CSAR_peak_! | 18.73 +        |
| chr1 | 11616872 | 11616930 | CSAR_peak_! | 6.94 +         |
| chr1 | 11617174 | 11617255 | CSAR_peak_! | 13.48,10.02 +  |
| chr1 | 11673411 | 11673462 | CSAR_peak_! | 8.39 +         |
| chr1 | 11674880 | 11674972 | CSAR_peak_! | 6.22,6.21,6.2+ |
| chr1 | 11677439 | 11677461 | CSAR_peak_! | 7.27 +         |
| chr1 | 11685059 | 11685149 | CSAR_peak_! | 10.32,6.32,1(+ |
| chr1 | 11685234 | 11685325 | CSAR_peak_! | 64.62,40.9 +   |
| chr1 | 11738261 | 11738304 | CSAR_peak_! | 11.66,6.95,1(+ |
| chr1 | 11738371 | 11738406 | CSAR_peak_! | 6.21 +         |
| chr1 | 11738456 | 11738577 | CSAR_peak_! | 12.5,11.07 +   |
| chr1 | 11738654 | 11738813 | CSAR_peak_! | 7.27,22.56,1(+ |
| chr1 | 11738818 | 11738875 | CSAR_peak_! | 7.13 +         |
| chr1 | 11738888 | 11738952 | CSAR_peak_! | 8.95 +         |
| chr1 | 11739045 | 11739123 | CSAR_peak_! | 5.97,7.34 +    |
| chr1 | 11827550 | 11827591 | CSAR_peak_! | 7.27 +         |
| chr1 | 11827855 | 11827945 | CSAR_peak_! | 7.92,6.21 +    |
| chr1 | 11828270 | 11828371 | CSAR_peak_! | 10.02 +        |
| chr1 | 11828391 | 11828485 | CSAR_peak_! | 12.13 +        |
| chr1 | 11828944 | 11829021 | CSAR_peak_! | 8.39,9.77 +    |
| chr1 | 11829181 | 11829222 | CSAR_peak_! | 6.21,10.95 +   |
| chr1 | 11829270 | 11829396 | CSAR_peak_! | 10.83,9.32,9.+ |
| chr1 | 11829605 | 11829743 | CSAR_peak_! | 7.27,6.57,6.5+ |
| chr1 | 11829844 | 11829892 | CSAR_peak_! | 6.21 +         |
| chr1 | 11928893 | 11929173 | CSAR_peak_! | 16.33,8.52,1(+ |
| chr1 | 11929224 | 11929280 | CSAR_peak_! | 15.68 +        |
| chr1 | 12007469 | 12007535 | CSAR_peak_! | 7.27 +         |
| chr1 | 12007642 | 12007649 | CSAR_peak_! | 6.21 +         |
| chr1 | 12011453 | 12011508 | CSAR_peak_! | 6.95 +         |
| chr1 | 12023827 | 12023882 | CSAR_peak_! | 6.95 +         |
| chr1 | 12047281 | 12047336 | CSAR_peak_! | 10.83 +        |
| chr1 | 12048786 | 12048832 | CSAR_peak_! | 10.83 +        |
| chr1 | 12048922 | 12048977 | CSAR_peak_! | 6.85 +         |
| chr1 | 12049717 | 12049778 | CSAR_peak_! | 6.85,6.03 +    |
| chr1 | 12083956 | 12084059 | CSAR_peak_! | 13.83,95.06,(+ |
| chr1 | 12120521 | 12120578 | CSAR_peak_! | 6.21,6.21 +    |
| chr1 | 12121554 | 12121590 | CSAR_peak_! | 6.21 +         |
| chr1 | 12121986 | 12122036 | CSAR_peak_! | 8.39 +         |
| chr1 | 12123127 | 12123157 | CSAR_peak_! | 8.39 +         |
| chr1 | 12123255 | 12123316 | CSAR_peak_! | 7.58 +         |

|      |          |          |             |               |   |
|------|----------|----------|-------------|---------------|---|
| chr1 | 12178898 | 12178948 | CSAR_peak_  | 9.97          | + |
| chr1 | 12178953 | 12179029 | CSAR_peak_  | 9.77          | + |
| chr1 | 12179060 | 12179107 | CSAR_peak_! | 6.21          | + |
| chr1 | 12180883 | 12180964 | CSAR_peak_  | 6.85          | + |
| chr1 | 12180975 | 12181063 | CSAR_peak_  | 11.96,10.02   | + |
| chr1 | 12181156 | 12181284 | CSAR_peak_  | 6.94,11.14    | + |
| chr1 | 12181804 | 12181958 | CSAR_peak_  | 9.58,14.88    | + |
| chr1 | 12181961 | 12182023 | CSAR_peak_! | 15.43         | + |
| chr1 | 12182055 | 12182112 | CSAR_peak_  | 12.31         | + |
| chr1 | 12182473 | 12182536 | CSAR_peak_  | 7.27          | + |
| chr1 | 12182977 | 12183021 | CSAR_peak_  | 8.39          | + |
| chr1 | 12204711 | 12204797 | CSAR_peak_  | 6.03          | + |
| chr1 | 12204837 | 12204881 | CSAR_peak_  | 8.39          | + |
| chr1 | 12205413 | 12205475 | CSAR_peak_  | 12.31         | + |
| chr1 | 12238032 | 12238108 | CSAR_peak_! | 10.95,10.83   | + |
| chr1 | 12238358 | 12238407 | CSAR_peak_  | 7.73,5.62     | + |
| chr1 | 12258313 | 12258401 | CSAR_peak_  | 13.48,7.27    | + |
| chr1 | 12259404 | 12259458 | CSAR_peak_  | 6.95          | + |
| chr1 | 12292457 | 12292488 | CSAR_peak_! | 8.39          | + |
| chr1 | 12294495 | 12294536 | CSAR_peak_  | 40.95,8.69    | + |
| chr1 | 12294700 | 12294735 | CSAR_peak_  | 8.95          | + |
| chr1 | 12352853 | 12352938 | CSAR_peak_! | 11.66         | + |
| chr1 | 12353021 | 12353089 | CSAR_peak_! | 10.12         | + |
| chr1 | 12353263 | 12353334 | CSAR_peak_! | 8.95,8.39     | + |
| chr1 | 12451818 | 12451916 | CSAR_peak_! | 10.95         | + |
| chr1 | 12452115 | 12452160 | CSAR_peak_  | 10.83         | + |
| chr1 | 12453134 | 12453207 | CSAR_peak_! | 13.48,7.27    | + |
| chr1 | 12454224 | 12454281 | CSAR_peak_  | 8.39          | + |
| chr1 | 12462313 | 12462362 | CSAR_peak_! | 8.39,6.03,17. | + |
| chr1 | 12462438 | 12462449 | CSAR_peak_  | 6.21          | + |
| chr1 | 12485846 | 12485893 | CSAR_peak_  | 8.95          | + |
| chr1 | 12485909 | 12485962 | CSAR_peak_! | 8.39          | + |
| chr1 | 12486074 | 12486125 | CSAR_peak_! | 7.58          | + |
| chr1 | 12486214 | 12486298 | CSAR_peak_! | 13.51,8.95    | + |
| chr1 | 12486318 | 12486417 | CSAR_peak_  | 16.05,13.51   | + |
| chr1 | 12486634 | 12486673 | CSAR_peak_  | 12.13         | + |
| chr1 | 12486757 | 12486805 | CSAR_peak_  | 7.27          | + |
| chr1 | 12487004 | 12487103 | CSAR_peak_  | 13.48,8.95,7. | + |
| chr1 | 12487190 | 12487234 | CSAR_peak_! | 8.39          | + |
| chr1 | 12488170 | 12488233 | CSAR_peak_  | 6.21,7.27     | + |
| chr1 | 12488274 | 12488338 | CSAR_peak_  | 10.31,16.05   | + |
| chr1 | 12488705 | 12488787 | CSAR_peak_! | 8.58          | + |

|      |          |          |            |                 |   |
|------|----------|----------|------------|-----------------|---|
| chr1 | 12489267 | 12489305 | CSAR_peak_ | 12.13,12.13     | + |
| chr1 | 12489516 | 12489541 | CSAR_peak_ | 6.03,7.27       | + |
| chr1 | 12489913 | 12489957 | CSAR_peak_ | 7.27            | + |
| chr1 | 12490883 | 12490948 | CSAR_peak_ | 8.39            | + |
| chr1 | 12491598 | 12491650 | CSAR_peak_ | 6.21,6.57       | + |
| chr1 | 12521180 | 12521224 | CSAR_peak_ | 6.21            | + |
| chr1 | 12521379 | 12521434 | CSAR_peak_ | 7.27,10.02      | + |
| chr1 | 12521753 | 12521841 | CSAR_peak_ | 5.62            | + |
| chr1 | 12521879 | 12521980 | CSAR_peak_ | 9.27,10.99,7.   | + |
| chr1 | 12531439 | 12531496 | CSAR_peak_ | 14.88,6.22      | + |
| chr1 | 12531778 | 12531807 | CSAR_peak_ | 6.21            | + |
| chr1 | 12550997 | 12551034 | CSAR_peak_ | 7.27            | + |
| chr1 | 12840461 | 12840511 | CSAR_peak_ | 8.39            | + |
| chr1 | 12845207 | 12845296 | CSAR_peak_ | 7.27,9.58       | + |
| chr1 | 12852136 | 12852192 | CSAR_peak_ | 12.13           | + |
| chr1 | 12852577 | 12852675 | CSAR_peak_ | 13.48,8.65      | + |
| chr1 | 12852713 | 12852839 | CSAR_peak_ | 11.32,6.21,1(+  |   |
| chr1 | 12852879 | 12852973 | CSAR_peak_ | 12.31,6.57      | + |
| chr1 | 12867329 | 12867396 | CSAR_peak_ | 8.39            | + |
| chr1 | 12867678 | 12867728 | CSAR_peak_ | 6.21            | + |
| chr1 | 12891225 | 12891268 | CSAR_peak_ | 6.21            | + |
| chr1 | 12979589 | 12979631 | CSAR_peak_ | 7.27            | + |
| chr1 | 13041269 | 13041321 | CSAR_peak_ | 8.95            | + |
| chr1 | 13077995 | 13078046 | CSAR_peak_ | 7.27            | + |
| chr1 | 13145846 | 13145938 | CSAR_peak_ | 8.39,18.95,1(+  |   |
| chr1 | 13145950 | 13146077 | CSAR_peak_ | 25.12,16.33     | + |
| chr1 | 13146091 | 13146121 | CSAR_peak_ | 6.21            | + |
| chr1 | 13146168 | 13146211 | CSAR_peak_ | 7.27            | + |
| chr1 | 13146375 | 13146417 | CSAR_peak_ | 12.13           | + |
| chr1 | 13146540 | 13146568 | CSAR_peak_ | 8.39            | + |
| chr1 | 13146632 | 13146660 | CSAR_peak_ | 6.21            | + |
| chr1 | 13157824 | 13157850 | CSAR_peak_ | 6.21            | + |
| chr1 | 13207450 | 13207505 | CSAR_peak_ | 7.68            | + |
| chr1 | 13207513 | 13207525 | CSAR_peak_ | 6.21            | + |
| chr1 | 13207592 | 13207672 | CSAR_peak_ | 13.44,7.27      | + |
| chr1 | 13225281 | 13225385 | CSAR_peak_ | 13.48,6.14      | + |
| chr1 | 13225873 | 13225986 | CSAR_peak_ | 19.36,35.26,1(+ |   |
| chr1 | 13225998 | 13226027 | CSAR_peak_ | 8.52            | + |
| chr1 | 13226149 | 13226255 | CSAR_peak_ | 8.39,6.95,10.   | + |
| chr1 | 13226449 | 13226505 | CSAR_peak_ | 10.83           | + |
| chr1 | 13451073 | 13451110 | CSAR_peak_ | 10.31,6.57      | + |
| chr1 | 13534689 | 13534724 | CSAR_peak_ | 8.39            | + |



|      |          |          |             |               |   |
|------|----------|----------|-------------|---------------|---|
| chr1 | 13535479 | 13535547 | CSAR_peak_! | 13.48,16.08,: | + |
| chr1 | 13536321 | 13536369 | CSAR_peak_! | 10.83         | + |
| chr1 | 13536453 | 13536497 | CSAR_peak_! | 7.27          | + |
| chr1 | 13536745 | 13536823 | CSAR_peak_! | 24.52         | + |
| chr1 | 13537120 | 13537170 | CSAR_peak_! | 7.58          | + |
| chr1 | 13537658 | 13537703 | CSAR_peak_! | 6.03          | + |
| chr1 | 13539581 | 13539626 | CSAR_peak_! | 6.21          | + |
| chr1 | 13540263 | 13540357 | CSAR_peak_! | 8.52,6.57     | + |
| chr1 | 13540986 | 13541036 | CSAR_peak_! | 6.78          | + |
| chr1 | 13541049 | 13541088 | CSAR_peak_! | 7.27          | + |
| chr1 | 13541286 | 13541369 | CSAR_peak_! | 8.39          | + |
| chr1 | 13543473 | 13543522 | CSAR_peak_! | 8.39          | + |
| chr1 | 14158744 | 14158856 | CSAR_peak_! | 6.21,10.07,6. | + |
| chr1 | 14159456 | 14159503 | CSAR_peak_! | 6.21          | + |
| chr1 | 14159529 | 14159662 | CSAR_peak_! | 9.27          | + |
| chr1 | 14159777 | 14159815 | CSAR_peak_! | 6.57          | + |
| chr1 | 14160079 | 14160098 | CSAR_peak_! | 6.31          | + |
| chr1 | 14160234 | 14160284 | CSAR_peak_! | 8.95          | + |
| chr1 | 14160285 | 14160371 | CSAR_peak_! | 6.12,6.21     | + |
| chr1 | 14160691 | 14160708 | CSAR_peak_! | 6.21          | + |
| chr1 | 14161235 | 14161286 | CSAR_peak_! | 6.21          | + |
| chr1 | 14161341 | 14161389 | CSAR_peak_! | 8.39          | + |
| chr1 | 14161762 | 14161803 | CSAR_peak_! | 7.27          | + |
| chr1 | 15276606 | 15276645 | CSAR_peak_! | 16.05         | + |
| chr1 | 15279726 | 15279765 | CSAR_peak_! | 16.05         | + |
| chr1 | 15374703 | 15374742 | CSAR_peak_! | 16.05         | + |
| chr1 | 15377823 | 15377862 | CSAR_peak_! | 16.05         | + |
| chr1 | 15892257 | 15892284 | CSAR_peak_! | 6.57          | + |
| chr1 | 15892290 | 15892344 | CSAR_peak_! | 5.62          | + |
| chr1 | 15892682 | 15892720 | CSAR_peak_! | 7.92          | + |
| chr1 | 15893164 | 15893222 | CSAR_peak_! | 9.35,12.15    | + |
| chr1 | 15893337 | 15893382 | CSAR_peak_! | 6.95,7.68     | + |
| chr1 | 15893626 | 15893723 | CSAR_peak_! | 6.57,6.95     | + |
| chr1 | 15893822 | 15893905 | CSAR_peak_! | 6.1           | + |
| chr1 | 15926953 | 15926992 | CSAR_peak_! | 7.27          | + |
| chr1 | 15927480 | 15927532 | CSAR_peak_! | 10.83         | + |
| chr1 | 15927615 | 15927683 | CSAR_peak_! | 12.13         | + |
| chr1 | 15927726 | 15927766 | CSAR_peak_! | 11.14,13.48   | + |
| chr1 | 15927844 | 15927928 | CSAR_peak_! | 9.77          | + |
| chr1 | 15928288 | 15928369 | CSAR_peak_! | 10.02         | + |
| chr1 | 15928457 | 15928475 | CSAR_peak_! | 8.65          | + |
| chr1 | 15928482 | 15928531 | CSAR_peak_! | 9.87,8.84     | + |

|      |          |          |            |                  |   |
|------|----------|----------|------------|------------------|---|
| chr1 | 15928606 | 15928612 | CSAR_peak_ | 6.2              | + |
| chr1 | 15928670 | 15928724 | CSAR_peak_ | 6.03,17.52,11.66 | + |
| chr1 | 15929071 | 15929141 | CSAR_peak_ | 6.03,8.39        | + |
| chr1 | 15929226 | 15929258 | CSAR_peak_ | 7.73,8.39        | + |
| chr1 | 15929282 | 15929328 | CSAR_peak_ | 9.61,10.02       | + |
| chr1 | 15929442 | 15929495 | CSAR_peak_ | 8.39,7.27        | + |
| chr1 | 15929688 | 15929728 | CSAR_peak_ | 7.27             | + |
| chr1 | 15930491 | 15930537 | CSAR_peak_ | 6.57,8.12        | + |
| chr1 | 15930760 | 15930815 | CSAR_peak_ | 8.61             | + |
| chr1 | 15930975 | 15931019 | CSAR_peak_ | 11.66            | + |
| chr1 | 15931039 | 15931095 | CSAR_peak_ | 9.97,6.57        | + |
| chr1 | 15931135 | 15931187 | CSAR_peak_ | 6.03             | + |
| chr1 | 15931500 | 15931566 | CSAR_peak_ | 10.18            | + |
| chr1 | 15931708 | 15931755 | CSAR_peak_ | 7.92,12.13       | + |
| chr1 | 15931831 | 15931883 | CSAR_peak_ | 12.13            | + |
| chr1 | 15932101 | 15932145 | CSAR_peak_ | 7.2              | + |
| chr1 | 15932191 | 15932239 | CSAR_peak_ | 6.45,7.27        | + |
| chr1 | 15933020 | 15933071 | CSAR_peak_ | 10.7,6.02,14.76  | + |
| chr1 | 15933159 | 15933195 | CSAR_peak_ | 6.1              | + |
| chr1 | 15934449 | 15934496 | CSAR_peak_ | 7.29,8.13        | + |
| chr1 | 15934670 | 15934709 | CSAR_peak_ | 10.7             | + |
| chr1 | 15935004 | 15935069 | CSAR_peak_ | 8.65,6.57        | + |
| chr1 | 15935575 | 15935618 | CSAR_peak_ | 6.21             | + |
| chr1 | 15936352 | 15936393 | CSAR_peak_ | 6.21             | + |
| chr1 | 15938644 | 15938654 | CSAR_peak_ | 6.21             | + |
| chr1 | 15977415 | 15977463 | CSAR_peak_ | 14.76            | + |
| chr1 | 15978308 | 15978431 | CSAR_peak_ | 6.21,7.27        | + |
| chr1 | 15979108 | 15979147 | CSAR_peak_ | 6.21             | + |
| chr1 | 16127937 | 16127986 | CSAR_peak_ | 8.28             | + |
| chr1 | 16128955 | 16128996 | CSAR_peak_ | 8.39             | + |
| chr1 | 16129180 | 16129209 | CSAR_peak_ | 6.21             | + |
| chr1 | 16266751 | 16266791 | CSAR_peak_ | 10.57            | + |
| chr1 | 16266969 | 16267019 | CSAR_peak_ | 6.87             | + |
| chr1 | 16267325 | 16267377 | CSAR_peak_ | 11.14,10.83      | + |
| chr1 | 16267486 | 16267543 | CSAR_peak_ | 6.21             | + |
| chr1 | 16268247 | 16268269 | CSAR_peak_ | 7.26,7.73        | + |
| chr1 | 16433977 | 16434021 | CSAR_peak_ | 17.4,5.67        | + |
| chr1 | 16468191 | 16468261 | CSAR_peak_ | 6.02             | + |
| chr1 | 16468286 | 16468343 | CSAR_peak_ | 14.88,6.21       | + |
| chr1 | 16468565 | 16468613 | CSAR_peak_ | 20.94            | + |
| chr1 | 16468681 | 16468730 | CSAR_peak_ | 8.28,6.57        | + |
| chr1 | 16469430 | 16469465 | CSAR_peak_ | 7.58             | + |

|      |          |          |            |                |   |
|------|----------|----------|------------|----------------|---|
| chr1 | 16469542 | 16469613 | CSAR_peak_ | 8.95,9.8       | + |
| chr1 | 16469728 | 16469767 | CSAR_peak_ | 8.95           | + |
| chr1 | 16619190 | 16619243 | CSAR_peak_ | 6.45,7.92      | + |
| chr1 | 16621460 | 16621485 | CSAR_peak_ | 6.21           | + |
| chr1 | 16647957 | 16647993 | CSAR_peak_ | 6.03           | + |
| chr1 | 16648072 | 16648106 | CSAR_peak_ | 9.58           | + |
| chr1 | 16648159 | 16648186 | CSAR_peak_ | 6.21           | + |
| chr1 | 16977729 | 16977777 | CSAR_peak_ | 7.27           | + |
| chr1 | 16979554 | 16979606 | CSAR_peak_ | 6.57,6.95      | + |
| chr1 | 16979797 | 16979866 | CSAR_peak_ | 6.57,6.95      | + |
| chr1 | 16980552 | 16980586 | CSAR_peak_ | 6.03           | + |
| chr1 | 16982190 | 16982234 | CSAR_peak_ | 7.92           | + |
| chr1 | 16982430 | 16982475 | CSAR_peak_ | 6.95           | + |
| chr1 | 17009226 | 17009280 | CSAR_peak_ | 6.21           | + |
| chr1 | 17124730 | 17124804 | CSAR_peak_ | 16.33,9.58     | + |
| chr1 | 17124878 | 17124896 | CSAR_peak_ | 6.57           | + |
| chr1 | 17125006 | 17125051 | CSAR_peak_ | 9.58           | + |
| chr1 | 17125531 | 17125572 | CSAR_peak_ | 6.21           | + |
| chr1 | 17179451 | 17179506 | CSAR_peak_ | 8.39           | + |
| chr1 | 17425772 | 17425877 | CSAR_peak_ | 12.74,5.95,1(+ |   |
| chr1 | 17452366 | 17452466 | CSAR_peak_ | 6.45,7.34      | + |
| chr1 | 17452918 | 17452967 | CSAR_peak_ | 8.95           | + |
| chr1 | 17453296 | 17453345 | CSAR_peak_ | 8.65           | + |
| chr1 | 17453719 | 17453778 | CSAR_peak_ | 8.39           | + |
| chr1 | 17453919 | 17453964 | CSAR_peak_ | 7.27,7.58,14.+ |   |
| chr1 | 17454057 | 17454107 | CSAR_peak_ | 8.65           | + |
| chr1 | 17459152 | 17459233 | CSAR_peak_ | 6.21,6.57      | + |
| chr1 | 17459710 | 17459763 | CSAR_peak_ | 6.21           | + |
| chr1 | 17461775 | 17461794 | CSAR_peak_ | 7.27           | + |
| chr1 | 17462309 | 17462379 | CSAR_peak_ | 8.13           | + |
| chr1 | 17463467 | 17463512 | CSAR_peak_ | 6.21           | + |
| chr1 | 17479686 | 17479720 | CSAR_peak_ | 6.95           | + |
| chr1 | 17482710 | 17482735 | CSAR_peak_ | 6.21           | + |
| chr1 | 17482891 | 17482933 | CSAR_peak_ | 8.39,6.21      | + |
| chr1 | 17558490 | 17558571 | CSAR_peak_ | 9.58           | + |
| chr1 | 17559116 | 17559178 | CSAR_peak_ | 13.48          | + |
| chr1 | 17559297 | 17559332 | CSAR_peak_ | 7.27           | + |
| chr1 | 17559360 | 17559446 | CSAR_peak_ | 27.64,6.95     | + |
| chr1 | 17620996 | 17621031 | CSAR_peak_ | 6.03           | + |
| chr1 | 17621052 | 17621077 | CSAR_peak_ | 6.1            | + |
| chr1 | 17791263 | 17791304 | CSAR_peak_ | 7.27           | + |
| chr1 | 17847764 | 17847820 | CSAR_peak_ | 8.39           | + |

|      |          |          |            |               |   |
|------|----------|----------|------------|---------------|---|
| chr1 | 17907078 | 17907136 | CSAR_peak_ | 7.27          | + |
| chr1 | 17907427 | 17907489 | CSAR_peak_ | 7.11,17.37,7. | + |
| chr1 | 17908095 | 17908162 | CSAR_peak_ | 19.98         | + |
| chr1 | 17908279 | 17908327 | CSAR_peak_ | 7.29          | + |
| chr1 | 17910854 | 17910957 | CSAR_peak_ | 71.7,30.04,9  | + |
| chr1 | 17947381 | 17947433 | CSAR_peak_ | 7.27,10.83    | + |
| chr1 | 17947457 | 17947545 | CSAR_peak_ | 7.27          | + |
| chr1 | 17949036 | 17949068 | CSAR_peak_ | 5.62          | + |
| chr1 | 17967680 | 17967732 | CSAR_peak_ | 7.27          | + |
| chr1 | 18040547 | 18040597 | CSAR_peak_ | 7.27          | + |
| chr1 | 18098626 | 18098694 | CSAR_peak_ | 13.48         | + |
| chr1 | 18098776 | 18098818 | CSAR_peak_ | 8.52          | + |
| chr1 | 18099166 | 18099242 | CSAR_peak_ | 8.39          | + |
| chr1 | 18099330 | 18099396 | CSAR_peak_ | 16.33         | + |
| chr1 | 18099423 | 18099453 | CSAR_peak_ | 6.21          | + |
| chr1 | 18099616 | 18099661 | CSAR_peak_ | 12.13,8.65    | + |
| chr1 | 18099827 | 18099899 | CSAR_peak_ | 20.35,41.89   | + |
| chr1 | 18100532 | 18100585 | CSAR_peak_ | 6.02          | + |
| chr1 | 18100860 | 18100890 | CSAR_peak_ | 7.27          | + |
| chr1 | 18100987 | 18100994 | CSAR_peak_ | 7.27          | + |
| chr1 | 18101031 | 18101282 | CSAR_peak_ | 17.37,8.28    | + |
| chr1 | 18103295 | 18103383 | CSAR_peak_ | 6.21          | + |
| chr1 | 18234823 | 18234895 | CSAR_peak_ | 6.21          | + |
| chr1 | 18235084 | 18235157 | CSAR_peak_ | 7.27          | + |
| chr1 | 18236319 | 18236383 | CSAR_peak_ | 12.17,6.57,6. | + |
| chr1 | 18236472 | 18236553 | CSAR_peak_ | 9.58,14.88,1! | + |
| chr1 | 18236640 | 18236656 | CSAR_peak_ | 6.57          | + |
| chr1 | 18236677 | 18236786 | CSAR_peak_ | 13.48,13.44   | + |
| chr1 | 18236902 | 18236933 | CSAR_peak_ | 8.39          | + |
| chr1 | 18254073 | 18254125 | CSAR_peak_ | 7.27          | + |
| chr1 | 18254658 | 18254779 | CSAR_peak_ | 7.27,13.48    | + |
| chr1 | 18256533 | 18256575 | CSAR_peak_ | 6.57          | + |
| chr1 | 18260232 | 18260277 | CSAR_peak_ | 6.21          | + |
| chr1 | 18261610 | 18261623 | CSAR_peak_ | 6.03          | + |
| chr1 | 18263882 | 18263935 | CSAR_peak_ | 6.21          | + |
| chr1 | 18291701 | 18291763 | CSAR_peak_ | 7.27          | + |
| chr1 | 18328608 | 18328648 | CSAR_peak_ | 8.39          | + |
| chr1 | 18329917 | 18330008 | CSAR_peak_ | 13.48,7.92,5. | + |
| chr1 | 18330622 | 18330674 | CSAR_peak_ | 10.83         | + |
| chr1 | 18330766 | 18330776 | CSAR_peak_ | 8.39          | + |
| chr1 | 18330808 | 18330910 | CSAR_peak_ | 13.44,10.02   | + |
| chr1 | 18331515 | 18331551 | CSAR_peak_ | 5.62          | + |

|      |          |          |            |                 |   |
|------|----------|----------|------------|-----------------|---|
| chr1 | 18331922 | 18331969 | CSAR_peak_ | 6.21            | + |
| chr1 | 18333107 | 18333170 | CSAR_peak_ | 17.37           | + |
| chr1 | 18333277 | 18333333 | CSAR_peak_ | 12.13           | + |
| chr1 | 18333368 | 18333400 | CSAR_peak_ | 8.39            | + |
| chr1 | 18400728 | 18401084 | CSAR_peak_ | 10.94,8.94,1.1  | + |
| chr1 | 18401120 | 18401188 | CSAR_peak_ | 29.69,7.2       | + |
| chr1 | 18401189 | 18401345 | CSAR_peak_ | 6.72,7.27,9.5   | + |
| chr1 | 18401356 | 18401485 | CSAR_peak_ | 10.7,7.06       | + |
| chr1 | 18401536 | 18401614 | CSAR_peak_ | 12.74           | + |
| chr1 | 18401649 | 18401705 | CSAR_peak_ | 9.02,30.8       | + |
| chr1 | 18401708 | 18401856 | CSAR_peak_ | 16.55,24.33,1.1 | + |
| chr1 | 18401862 | 18401967 | CSAR_peak_ | 37.04,17.37,1.1 | + |
| chr1 | 18401980 | 18402014 | CSAR_peak_ | 6.21            | + |
| chr1 | 18402085 | 18402129 | CSAR_peak_ | 10.33           | + |
| chr1 | 18402207 | 18402557 | CSAR_peak_ | 18.1,24.21,1.1  | + |
| chr1 | 18402569 | 18402719 | CSAR_peak_ | 27.61,21.22     | + |
| chr1 | 18403030 | 18403078 | CSAR_peak_ | 7.27            | + |
| chr1 | 18403163 | 18403321 | CSAR_peak_ | 8.39,7.26       | + |
| chr1 | 18403327 | 18403403 | CSAR_peak_ | 8.39            | + |
| chr1 | 18403409 | 18403500 | CSAR_peak_ | 13.32           | + |
| chr1 | 18403633 | 18403712 | CSAR_peak_ | 8.65,12.17      | + |
| chr1 | 18403740 | 18403797 | CSAR_peak_ | 8.39            | + |
| chr1 | 18404417 | 18404566 | CSAR_peak_ | 12.13,8.39      | + |
| chr1 | 18453409 | 18453449 | CSAR_peak_ | 10.02,7.58,9.1  | + |
| chr1 | 18453528 | 18453566 | CSAR_peak_ | 11.14,9.77      | + |
| chr1 | 18660802 | 18660874 | CSAR_peak_ | 7.58            | + |
| chr1 | 18674201 | 18674244 | CSAR_peak_ | 12.13           | + |
| chr1 | 18674614 | 18674664 | CSAR_peak_ | 6.21            | + |
| chr1 | 18677099 | 18677178 | CSAR_peak_ | 12.13           | + |
| chr1 | 18694087 | 18694136 | CSAR_peak_ | 9.77            | + |
| chr1 | 18694230 | 18694281 | CSAR_peak_ | 8.39            | + |
| chr1 | 18695929 | 18696004 | CSAR_peak_ | 9.58            | + |
| chr1 | 18696141 | 18696169 | CSAR_peak_ | 9.58            | + |
| chr1 | 18697122 | 18697226 | CSAR_peak_ | 9.77,6.03       | + |
| chr1 | 18702745 | 18702795 | CSAR_peak_ | 10.83           | + |
| chr1 | 18795264 | 18795314 | CSAR_peak_ | 6.21            | + |
| chr1 | 18796174 | 18796241 | CSAR_peak_ | 10.83           | + |
| chr1 | 18799183 | 18799224 | CSAR_peak_ | 6.57            | + |
| chr1 | 18799701 | 18799742 | CSAR_peak_ | 7.92            | + |
| chr1 | 18808101 | 18808144 | CSAR_peak_ | 6.21            | + |
| chr1 | 18808569 | 18808613 | CSAR_peak_ | 6.22,7.2        | + |
| chr1 | 18808705 | 18808781 | CSAR_peak_ | 16.11,6.22      | + |

|      |          |          |            |               |   |
|------|----------|----------|------------|---------------|---|
| chr1 | 18808783 | 18808859 | CSAR_peak_ | 6.57          | + |
| chr1 | 18808890 | 18808933 | CSAR_peak_ | 7.27          | + |
| chr1 | 18809247 | 18809308 | CSAR_peak_ | 8.39          | + |
| chr1 | 18809452 | 18809515 | CSAR_peak_ | 6.57,6.02     | + |
| chr1 | 18809829 | 18809879 | CSAR_peak_ | 6.57          | + |
| chr1 | 18810122 | 18810220 | CSAR_peak_ | 6.21,7.27,6.4 | + |
| chr1 | 18810606 | 18810671 | CSAR_peak_ | 9.77          | + |
| chr1 | 18811022 | 18811135 | CSAR_peak_ | 6.2,19.96     | + |
| chr1 | 18811292 | 18811465 | CSAR_peak_ | 12.13,12.13   | + |
| chr1 | 18926940 | 18927001 | CSAR_peak_ | 9.58          | + |
| chr1 | 18927302 | 18927345 | CSAR_peak_ | 6.03          | + |
| chr1 | 18928027 | 18928079 | CSAR_peak_ | 6.21          | + |
| chr1 | 18928859 | 18928934 | CSAR_peak_ | 13.48,6.21    | + |
| chr1 | 18932938 | 18932984 | CSAR_peak_ | 6.64          | + |
| chr1 | 18933087 | 18933130 | CSAR_peak_ | 9.03,16.33    | + |
| chr1 | 18933140 | 18933211 | CSAR_peak_ | 8.39,13       | + |
| chr1 | 18933221 | 18933324 | CSAR_peak_ | 17.37,19.18,1 | + |
| chr1 | 18933366 | 18933517 | CSAR_peak_ | 16.33,9.79,6. | + |
| chr1 | 18933534 | 18933586 | CSAR_peak_ | 9.58          | + |
| chr1 | 18933686 | 18933768 | CSAR_peak_ | 8.95,10.68    | + |
| chr1 | 18934013 | 18934067 | CSAR_peak_ | 9.58,6.21     | + |
| chr1 | 18934187 | 18934287 | CSAR_peak_ | 8.39,8.39     | + |
| chr1 | 18934502 | 18934746 | CSAR_peak_ | 17.82,10.53,1 | + |
| chr1 | 18935708 | 18935764 | CSAR_peak_ | 6.21          | + |
| chr1 | 18936052 | 18936108 | CSAR_peak_ | 7.27          | + |
| chr1 | 18936529 | 18936614 | CSAR_peak_ | 8.39          | + |
| chr1 | 18936676 | 18936816 | CSAR_peak_ | 7.27,13.51,1  | + |
| chr1 | 18936879 | 18936906 | CSAR_peak_ | 7.27          | + |
| chr1 | 18937064 | 18937119 | CSAR_peak_ | 8.65,12.13,1  | + |
| chr1 | 18937202 | 18937226 | CSAR_peak_ | 10.83,7.27    | + |
| chr1 | 18937264 | 18937307 | CSAR_peak_ | 9.58,7.27     | + |
| chr1 | 19008256 | 19008305 | CSAR_peak_ | 6.02,14.85,1  | + |
| chr1 | 19010086 | 19010143 | CSAR_peak_ | 12.17         | + |
| chr1 | 19136673 | 19136758 | CSAR_peak_ | 17.82         | + |
| chr1 | 19137031 | 19137079 | CSAR_peak_ | 10.83         | + |
| chr1 | 19137759 | 19137818 | CSAR_peak_ | 6.21          | + |
| chr1 | 19137885 | 19138018 | CSAR_peak_ | 8.39          | + |
| chr1 | 19138612 | 19138647 | CSAR_peak_ | 8.39          | + |
| chr1 | 19138744 | 19138800 | CSAR_peak_ | 7.27          | + |
| chr1 | 19138860 | 19138936 | CSAR_peak_ | 20.43,9.27    | + |
| chr1 | 19138951 | 19138989 | CSAR_peak_ | 8.65          | + |
| chr1 | 19139167 | 19139234 | CSAR_peak_ | 13.44,6.21    | + |

|      |          |          |            |                   |   |
|------|----------|----------|------------|-------------------|---|
| chr1 | 19139333 | 19139414 | CSAR_peak_ | 7.36,11.14,11.14  | + |
| chr1 | 19139491 | 19139519 | CSAR_peak_ | 6.02              | + |
| chr1 | 19166809 | 19166860 | CSAR_peak_ | 6.03              | + |
| chr1 | 19167365 | 19167435 | CSAR_peak_ | 16.33,14.88       | + |
| chr1 | 19167445 | 19167466 | CSAR_peak_ | 8.65              | + |
| chr1 | 19169026 | 19169058 | CSAR_peak_ | 7.27              | + |
| chr1 | 19169544 | 19169594 | CSAR_peak_ | 7.58,13.48        | + |
| chr1 | 19169681 | 19169749 | CSAR_peak_ | 8.39,8.12,7.6     | + |
| chr1 | 19182126 | 19182218 | CSAR_peak_ | 10.83,14.88       | + |
| chr1 | 19183760 | 19183790 | CSAR_peak_ | 6.21              | + |
| chr1 | 19184131 | 19184189 | CSAR_peak_ | 7.58              | + |
| chr1 | 19184566 | 19184613 | CSAR_peak_ | 5.62              | + |
| chr1 | 19199868 | 19199908 | CSAR_peak_ | 10.12             | + |
| chr1 | 19200114 | 19200187 | CSAR_peak_ | 6.95,8.65,16.1    | + |
| chr1 | 19200251 | 19200339 | CSAR_peak_ | 6.03,14.88,8.1    | + |
| chr1 | 19200360 | 19200505 | CSAR_peak_ | 6.21,20.13,6.1    | + |
| chr1 | 19200649 | 19200729 | CSAR_peak_ | 6.21,7.27         | + |
| chr1 | 19200749 | 19200809 | CSAR_peak_ | 5.62              | + |
| chr1 | 19201020 | 19201053 | CSAR_peak_ | 7.27              | + |
| chr1 | 19201091 | 19201207 | CSAR_peak_ | 16.11,10.31,11.14 | + |
| chr1 | 19201589 | 19201686 | CSAR_peak_ | 8.39              | + |
| chr1 | 19214470 | 19214508 | CSAR_peak_ | 10.95             | + |
| chr1 | 19216187 | 19216220 | CSAR_peak_ | 6.03              | + |
| chr1 | 19306693 | 19306730 | CSAR_peak_ | 6.03              | + |
| chr1 | 19437095 | 19437152 | CSAR_peak_ | 8.39,7.92         | + |
| chr1 | 19455149 | 19455210 | CSAR_peak_ | 6.21              | + |
| chr1 | 19457520 | 19457564 | CSAR_peak_ | 6.21              | + |
| chr1 | 19500375 | 19500404 | CSAR_peak_ | 8.39              | + |
| chr1 | 19501110 | 19501156 | CSAR_peak_ | 11.14             | + |
| chr1 | 19501343 | 19501412 | CSAR_peak_ | 11.38,13.48       | + |
| chr1 | 19501652 | 19501708 | CSAR_peak_ | 6.57              | + |
| chr1 | 19502579 | 19502631 | CSAR_peak_ | 12.13,7.27        | + |
| chr1 | 19503802 | 19503858 | CSAR_peak_ | 5.79              | + |
| chr1 | 19503972 | 19504016 | CSAR_peak_ | 6.21              | + |
| chr1 | 19504231 | 19504282 | CSAR_peak_ | 13.48             | + |
| chr1 | 19505047 | 19505092 | CSAR_peak_ | 20.54,11.14       | + |
| chr1 | 19505194 | 19505327 | CSAR_peak_ | 24.15,40.72       | + |
| chr1 | 19505789 | 19505831 | CSAR_peak_ | 7.27              | + |
| chr1 | 19505869 | 19505933 | CSAR_peak_ | 9.58,8.65         | + |
| chr1 | 19515688 | 19515733 | CSAR_peak_ | 8.39              | + |
| chr1 | 19516370 | 19516385 | CSAR_peak_ | 6.21              | + |
| chr1 | 19516726 | 19516771 | CSAR_peak_ | 7.27              | + |

|      |          |          |            |                |   |
|------|----------|----------|------------|----------------|---|
| chr1 | 19516854 | 19516894 | CSAR_peak_ | 7.27           | + |
| chr1 | 19516913 | 19516979 | CSAR_peak_ | 6.95,8.65      | + |
| chr1 | 19517004 | 19517069 | CSAR_peak_ | 8.65           | + |
| chr1 | 19517390 | 19517437 | CSAR_peak_ | 11.38          | + |
| chr1 | 19517551 | 19517604 | CSAR_peak_ | 7.61,6.57      | + |
| chr1 | 19517801 | 19517826 | CSAR_peak_ | 6.21           | + |
| chr1 | 19521665 | 19521715 | CSAR_peak_ | 6.21,7.27      | + |
| chr1 | 19522734 | 19522760 | CSAR_peak_ | 6.21           | + |
| chr1 | 19645431 | 19645487 | CSAR_peak_ | 9.58           | + |
| chr1 | 19646008 | 19646058 | CSAR_peak_ | 8.39           | + |
| chr1 | 19772944 | 19772991 | CSAR_peak_ | 12.13,9.58     | + |
| chr1 | 19773928 | 19773962 | CSAR_peak_ | 6.21           | + |
| chr1 | 19815855 | 19815885 | CSAR_peak_ | 10.95          | + |
| chr1 | 19816201 | 19816270 | CSAR_peak_ | 11.28,16.73,   | + |
| chr1 | 19818073 | 19818118 | CSAR_peak_ | 7.27           | + |
| chr1 | 19832214 | 19832257 | CSAR_peak_ | 6.21           | + |
| chr1 | 19832259 | 19832303 | CSAR_peak_ | 6.03           | + |
| chr1 | 19844995 | 19845064 | CSAR_peak_ | 8.39           | + |
| chr1 | 19845375 | 19845547 | CSAR_peak_ | 10.83,13.51,   | + |
| chr1 | 19845580 | 19845692 | CSAR_peak_ | 6.57,6.57,12.  | + |
| chr1 | 19845712 | 19845850 | CSAR_peak_ | 13.42,13.76    | + |
| chr1 | 19845853 | 19846190 | CSAR_peak_ | 16.11,6.91,1!  | + |
| chr1 | 19846263 | 19846440 | CSAR_peak_ | 25.3,31.58,1(+ |   |
| chr1 | 19846442 | 19846594 | CSAR_peak_ | 24.52,30.35    | + |
| chr1 | 19846631 | 19846656 | CSAR_peak_ | 8.72           | + |
| chr1 | 19846699 | 19846887 | CSAR_peak_ | 16.11,12.27,   | + |
| chr1 | 19847108 | 19847197 | CSAR_peak_ | 9.61           | + |
| chr1 | 19847262 | 19847420 | CSAR_peak_ | 12.21,23.89    | + |
| chr1 | 19847609 | 19847619 | CSAR_peak_ | 6.21           | + |
| chr1 | 19903946 | 19904010 | CSAR_peak_ | 7.27           | + |
| chr1 | 19921073 | 19921159 | CSAR_peak_ | 7.92,8.39      | + |
| chr1 | 19925659 | 19925739 | CSAR_peak_ | 6.57,10.31     | + |
| chr1 | 19926125 | 19926174 | CSAR_peak_ | 6.44           | + |
| chr1 | 19935347 | 19935362 | CSAR_peak_ | 6.21           | + |
| chr1 | 19936075 | 19936134 | CSAR_peak_ | 7.58,6.21      | + |
| chr1 | 19936185 | 19936360 | CSAR_peak_ | 6.45,19.36,6.  | + |
| chr1 | 19936524 | 19936595 | CSAR_peak_ | 8.39           | + |
| chr1 | 19936625 | 19936710 | CSAR_peak_ | 10.02,9.58     | + |
| chr1 | 19936770 | 19936842 | CSAR_peak_ | 6.21           | + |
| chr1 | 19936882 | 19937023 | CSAR_peak_ | 13.44,17.35,(+ |   |
| chr1 | 19937088 | 19937140 | CSAR_peak_ | 10.83          | + |
| chr1 | 19937217 | 19937314 | CSAR_peak_ | 9.35,10.17     | + |



|      |          |          |            |                |   |
|------|----------|----------|------------|----------------|---|
| chr1 | 19937373 | 19937463 | CSAR_peak_ | 8.65,9.72      | + |
| chr1 | 19937515 | 19937619 | CSAR_peak_ | 13.29,12.54,   | + |
| chr1 | 19937673 | 19937791 | CSAR_peak_ | 16.33,5.62,8.  | + |
| chr1 | 19937882 | 19937979 | CSAR_peak_ | 6.57           | + |
| chr1 | 19937984 | 19938072 | CSAR_peak_ | 14.88          | + |
| chr1 | 19938232 | 19938324 | CSAR_peak_ | 6.95,20.43,1(+ |   |
| chr1 | 19938413 | 19938463 | CSAR_peak_ | 6.21           | + |
| chr1 | 19938573 | 19938659 | CSAR_peak_ | 10.83,16.77    | + |
| chr1 | 19938817 | 19938881 | CSAR_peak_ | 8.39           | + |
| chr1 | 19938888 | 19938942 | CSAR_peak_ | 14.08          | + |
| chr1 | 19938960 | 19939013 | CSAR_peak_ | 6.03           | + |
| chr1 | 19939267 | 19939332 | CSAR_peak_ | 17.82          | + |
| chr1 | 19939446 | 19939461 | CSAR_peak_ | 6.21           | + |
| chr1 | 19939540 | 19939560 | CSAR_peak_ | 6.95           | + |
| chr1 | 19939574 | 19939680 | CSAR_peak_ | 7.26,6.65,7.3+ |   |
| chr1 | 19939771 | 19939818 | CSAR_peak_ | 8.28           | + |
| chr1 | 19939936 | 19939950 | CSAR_peak_ | 8.39           | + |
| chr1 | 19939976 | 19940068 | CSAR_peak_ | 7.92,10.13,1(+ |   |
| chr1 | 19940108 | 19940170 | CSAR_peak_ | 14.76          | + |
| chr1 | 19940180 | 19940274 | CSAR_peak_ | 29.69,10.13    | + |
| chr1 | 19940336 | 19940422 | CSAR_peak_ | 21.22,8.9      | + |
| chr1 | 19940425 | 19940617 | CSAR_peak_ | 6.21,20.94,1(+ |   |
| chr1 | 19940632 | 19940682 | CSAR_peak_ | 6.21           | + |
| chr1 | 19940826 | 19940901 | CSAR_peak_ | 10.83          | + |
| chr1 | 19946006 | 19946059 | CSAR_peak_ | 7.27,14.88     | + |
| chr1 | 19946805 | 19946983 | CSAR_peak_ | 8.39,6.57,16.  | + |
| chr1 | 19947077 | 19947133 | CSAR_peak_ | 16.54,15       | + |
| chr1 | 19947247 | 19947299 | CSAR_peak_ | 8.65           | + |
| chr1 | 19947394 | 19947487 | CSAR_peak_ | 7.73,14.85     | + |
| chr1 | 19947602 | 19947644 | CSAR_peak_ | 14.88          | + |
| chr1 | 19947695 | 19947730 | CSAR_peak_ | 6.57           | + |
| chr1 | 19947734 | 19947752 | CSAR_peak_ | 6.85           | + |
| chr1 | 19947765 | 19947799 | CSAR_peak_ | 7.92,10.83     | + |
| chr1 | 19947858 | 19948027 | CSAR_peak_ | 13,15.23,9.5(+ |   |
| chr1 | 19948029 | 19948099 | CSAR_peak_ | 6.57           | + |
| chr1 | 19948146 | 19948224 | CSAR_peak_ | 10.83,6.57     | + |
| chr1 | 19948343 | 19948393 | CSAR_peak_ | 7.26           | + |
| chr1 | 19948508 | 19948555 | CSAR_peak_ | 6.21           | + |
| chr1 | 19949048 | 19949098 | CSAR_peak_ | 8.65,7.27      | + |
| chr1 | 19949492 | 19949549 | CSAR_peak_ | 20.13,6.45     | + |
| chr1 | 19949617 | 19949676 | CSAR_peak_ | 10.33          | + |
| chr1 | 19949690 | 19949785 | CSAR_peak_ | 7.26           | + |

|      |          |          |            |               |   |
|------|----------|----------|------------|---------------|---|
| chr1 | 19950172 | 19950270 | CSAR_peak_ | 6.1,7.73      | + |
| chr1 | 19950351 | 19950443 | CSAR_peak_ | 20.94,10.02   | + |
| chr1 | 19950485 | 19950559 | CSAR_peak_ | 12.74,7.7     | + |
| chr1 | 19950586 | 19950765 | CSAR_peak_ | 7.92,9.61,6.4 | + |
| chr1 | 19950803 | 19950874 | CSAR_peak_ | 19.83,11.39   | + |
| chr1 | 19950953 | 19950968 | CSAR_peak_ | 11.83         | + |
| chr1 | 19951131 | 19951168 | CSAR_peak_ | 7.27          | + |
| chr1 | 19981407 | 19981567 | CSAR_peak_ | 6.28,156.92,  | + |
| chr1 | 19988990 | 19989045 | CSAR_peak_ | 7.27          | + |
| chr1 | 19989106 | 19989183 | CSAR_peak_ | 10.83,9.61    | + |
| chr1 | 19989262 | 19989304 | CSAR_peak_ | 7.58          | + |
| chr1 | 19989794 | 19989834 | CSAR_peak_ | 9.58,7.27     | + |
| chr1 | 19990315 | 19990460 | CSAR_peak_ | 21.51,16.05,  | + |
| chr1 | 19990634 | 19990778 | CSAR_peak_ | 9.61          | + |
| chr1 | 19997486 | 19997537 | CSAR_peak_ | 7.27          | + |
| chr1 | 19997709 | 19997760 | CSAR_peak_ | 6.03          | + |
| chr1 | 19999866 | 19999941 | CSAR_peak_ | 13.48,6.21    | + |
| chr1 | 20059240 | 20059302 | CSAR_peak_ | 8.28          | + |
| chr1 | 20064172 | 20064209 | CSAR_peak_ | 6.54          | + |
| chr1 | 20064525 | 20064571 | CSAR_peak_ | 8.39          | + |
| chr1 | 20082650 | 20082696 | CSAR_peak_ | 9.58          | + |
| chr1 | 20083013 | 20083052 | CSAR_peak_ | 6.21          | + |
| chr1 | 20083580 | 20083629 | CSAR_peak_ | 10.02         | + |
| chr1 | 20101636 | 20101722 | CSAR_peak_ | 12.13,6.21    | + |
| chr1 | 20101923 | 20101960 | CSAR_peak_ | 13.44         | + |
| chr1 | 20102054 | 20102098 | CSAR_peak_ | 7.27          | + |
| chr1 | 20102173 | 20102220 | CSAR_peak_ | 6.44          | + |
| chr1 | 20102268 | 20102294 | CSAR_peak_ | 6.57          | + |
| chr1 | 20102405 | 20102439 | CSAR_peak_ | 6.01          | + |
| chr1 | 20102485 | 20102617 | CSAR_peak_ | 6.71,25.62    | + |
| chr1 | 20102771 | 20102911 | CSAR_peak_ | 8.3,13.29,5.6 | + |
| chr1 | 20102934 | 20103027 | CSAR_peak_ | 7.58,14.76    | + |
| chr1 | 20103260 | 20103418 | CSAR_peak_ | 16.05,15.96   | + |
| chr1 | 20112366 | 20112408 | CSAR_peak_ | 6.21          | + |
| chr1 | 20112672 | 20112805 | CSAR_peak_ | 8.39,10.83    | + |
| chr1 | 20112858 | 20113002 | CSAR_peak_ | 6.95,5.71,5.7 | + |
| chr1 | 20113126 | 20113188 | CSAR_peak_ | 10.83         | + |
| chr1 | 20113336 | 20113398 | CSAR_peak_ | 12.13,13.44   | + |
| chr1 | 20113646 | 20113746 | CSAR_peak_ | 6.21          | + |
| chr1 | 20113766 | 20113821 | CSAR_peak_ | 12.13         | + |
| chr1 | 20118063 | 20118116 | CSAR_peak_ | 6.21          | + |
| chr1 | 20120085 | 20120158 | CSAR_peak_ | 8.52          | + |

|      |          |          |            |               |   |
|------|----------|----------|------------|---------------|---|
| chr1 | 20124931 | 20124973 | CSAR_peak_ | 6.21          | + |
| chr1 | 20125067 | 20125157 | CSAR_peak_ | 6.21          | + |
| chr1 | 20125237 | 20125370 | CSAR_peak_ | 8.39,10.83    | + |
| chr1 | 20125423 | 20125567 | CSAR_peak_ | 6.95,5.71,5.7 | + |
| chr1 | 20125691 | 20125759 | CSAR_peak_ | 14.88,6.03    | + |
| chr1 | 20125901 | 20125963 | CSAR_peak_ | 12.13,13.44   | + |
| chr1 | 20126211 | 20126311 | CSAR_peak_ | 6.21          | + |
| chr1 | 20126331 | 20126386 | CSAR_peak_ | 12.13         | + |
| chr1 | 20130628 | 20130681 | CSAR_peak_ | 6.21          | + |
| chr1 | 20132650 | 20132723 | CSAR_peak_ | 8.52          | + |
| chr1 | 20135295 | 20135347 | CSAR_peak_ | 12.31         | + |
| chr1 | 20135501 | 20135570 | CSAR_peak_ | 6.57,6.21,20. | + |
| chr1 | 20135652 | 20135757 | CSAR_peak_ | 8.39,6.03,6.5 | + |
| chr1 | 20135786 | 20135830 | CSAR_peak_ | 12.74,6.03    | + |
| chr1 | 20135850 | 20135872 | CSAR_peak_ | 8.12          | + |
| chr1 | 20135946 | 20136043 | CSAR_peak_ | 10.83,9.58    | + |
| chr1 | 20136427 | 20136459 | CSAR_peak_ | 6.45          | + |
| chr1 | 20136497 | 20136609 | CSAR_peak_ | 9.27          | + |
| chr1 | 20211820 | 20211878 | CSAR_peak_ | 13.48         | + |
| chr1 | 20211993 | 20212065 | CSAR_peak_ | 6.21          | + |
| chr1 | 20212603 | 20212670 | CSAR_peak_ | 9.27,7.58     | + |
| chr1 | 20212722 | 20212772 | CSAR_peak_ | 10.02         | + |
| chr1 | 20212801 | 20212832 | CSAR_peak_ | 8.95          | + |
| chr1 | 20213060 | 20213118 | CSAR_peak_ | 6.03          | + |
| chr1 | 20213299 | 20213362 | CSAR_peak_ | 13.51,12.13   | + |
| chr1 | 20213440 | 20213478 | CSAR_peak_ | 8.52,6.45     | + |
| chr1 | 20213664 | 20213716 | CSAR_peak_ | 9.58          | + |
| chr1 | 20216819 | 20216873 | CSAR_peak_ | 7.58          | + |
| chr1 | 20216879 | 20216943 | CSAR_peak_ | 12.13,10.02,( | + |
| chr1 | 20217027 | 20217068 | CSAR_peak_ | 8.39          | + |
| chr1 | 20217092 | 20217169 | CSAR_peak_ | 6.21          | + |
| chr1 | 20241969 | 20242051 | CSAR_peak_ | 10.83         | + |
| chr1 | 20258887 | 20258957 | CSAR_peak_ | 8.39          | + |
| chr1 | 20259953 | 20259963 | CSAR_peak_ | 6.95          | + |
| chr1 | 20260289 | 20260402 | CSAR_peak_ | 28.1,10.85,3  | + |
| chr1 | 20260476 | 20260563 | CSAR_peak_ | 16.54,6.85    | + |
| chr1 | 20261412 | 20261536 | CSAR_peak_ | 9.58          | + |
| chr1 | 20283486 | 20283563 | CSAR_peak_ | 8.39,10.02    | + |
| chr1 | 20285473 | 20285489 | CSAR_peak_ | 6.21          | + |
| chr1 | 20286271 | 20286303 | CSAR_peak_ | 9.58          | + |
| chr1 | 20289524 | 20289573 | CSAR_peak_ | 7.27          | + |
| chr1 | 20290127 | 20290173 | CSAR_peak_ | 9.61          | + |

|      |          |          |            |               |   |
|------|----------|----------|------------|---------------|---|
| chr1 | 20290367 | 20290437 | CSAR_peak_ | 8.39          | + |
| chr1 | 20290959 | 20291007 | CSAR_peak_ | 6.21          | + |
| chr1 | 20291952 | 20292002 | CSAR_peak_ | 8.39          | + |
| chr1 | 20351477 | 20351526 | CSAR_peak_ | 6.57          | + |
| chr1 | 20352587 | 20352639 | CSAR_peak_ | 7.58          | + |
| chr1 | 20353476 | 20353519 | CSAR_peak_ | 6.57          | + |
| chr1 | 20353690 | 20353738 | CSAR_peak_ | 11.14         | + |
| chr1 | 20354555 | 20354593 | CSAR_peak_ | 6.03          | + |
| chr1 | 20354909 | 20354930 | CSAR_peak_ | 7.27          | + |
| chr1 | 20355611 | 20355655 | CSAR_peak_ | 9.58,11.14    | + |
| chr1 | 20355851 | 20355872 | CSAR_peak_ | 9.77          | + |
| chr1 | 20355884 | 20355941 | CSAR_peak_ | 13.44,5.95,7. | + |
| chr1 | 20356020 | 20356040 | CSAR_peak_ | 6.95,9.58     | + |
| chr1 | 20424720 | 20424773 | CSAR_peak_ | 7.27          | + |
| chr1 | 20425410 | 20425451 | CSAR_peak_ | 8.13,6.71     | + |
| chr1 | 20426585 | 20426631 | CSAR_peak_ | 7.27          | + |
| chr1 | 20426839 | 20426871 | CSAR_peak_ | 8.39          | + |
| chr1 | 20426965 | 20427046 | CSAR_peak_ | 7.27,7.73     | + |
| chr1 | 20427126 | 20427211 | CSAR_peak_ | 8.65          | + |
| chr1 | 20428936 | 20428974 | CSAR_peak_ | 6.21          | + |
| chr1 | 20429897 | 20430002 | CSAR_peak_ | 9.58,9.58     | + |
| chr1 | 20430939 | 20431007 | CSAR_peak_ | 6.94,9.27     | + |
| chr1 | 20431029 | 20431100 | CSAR_peak_ | 8.09,6.44     | + |
| chr1 | 20431167 | 20431213 | CSAR_peak_ | 7.27          | + |
| chr1 | 20431228 | 20431304 | CSAR_peak_ | 17.82,14.85   | + |
| chr1 | 20431349 | 20431408 | CSAR_peak_ | 7.47          | + |
| chr1 | 20431496 | 20431546 | CSAR_peak_ | 8.65          | + |
| chr1 | 20431551 | 20431618 | CSAR_peak_ | 12.13,14.88   | + |
| chr1 | 20431683 | 20431746 | CSAR_peak_ | 10.58,10.83   | + |
| chr1 | 20432432 | 20432485 | CSAR_peak_ | 6.21          | + |
| chr1 | 20432673 | 20432728 | CSAR_peak_ | 10.83         | + |
| chr1 | 20441862 | 20441904 | CSAR_peak_ | 6.21          | + |
| chr1 | 20452001 | 20452072 | CSAR_peak_ | 6.95          | + |
| chr1 | 20471929 | 20471981 | CSAR_peak_ | 9.03          | + |
| chr1 | 20474029 | 20474082 | CSAR_peak_ | 6.21,8.39     | + |
| chr1 | 20528758 | 20528803 | CSAR_peak_ | 6.21          | + |
| chr1 | 20581466 | 20581484 | CSAR_peak_ | 5.62          | + |
| chr1 | 20581657 | 20581713 | CSAR_peak_ | 6.21          | + |
| chr1 | 20609131 | 20609177 | CSAR_peak_ | 6.21          | + |
| chr1 | 20610524 | 20610550 | CSAR_peak_ | 6.03          | + |
| chr1 | 20610762 | 20610782 | CSAR_peak_ | 6.21          | + |
| chr1 | 20611715 | 20611760 | CSAR_peak_ | 13.44,7.92    | + |

|      |          |          |            |               |   |
|------|----------|----------|------------|---------------|---|
| chr1 | 20632021 | 20632056 | CSAR_peak_ | 11.14         | + |
| chr1 | 20641118 | 20641136 | CSAR_peak_ | 8.39          | + |
| chr1 | 20645352 | 20645395 | CSAR_peak_ | 9.77          | + |
| chr1 | 20645584 | 20645626 | CSAR_peak_ | 6.21          | + |
| chr1 | 20652905 | 20652967 | CSAR_peak_ | 8.39,6.44     | + |
| chr1 | 20653419 | 20653473 | CSAR_peak_ | 8.95          | + |
| chr1 | 20724831 | 20724874 | CSAR_peak_ | 7.58,7.27     | + |
| chr1 | 20861345 | 20861361 | CSAR_peak_ | 6.03          | + |
| chr1 | 20861867 | 20861898 | CSAR_peak_ | 7.27          | + |
| chr1 | 20862247 | 20862295 | CSAR_peak_ | 6.52,17.19    | + |
| chr1 | 20862428 | 20862476 | CSAR_peak_ | 8.28          | + |
| chr1 | 20862820 | 20862934 | CSAR_peak_ | 13.44,7.27,9. | + |
| chr1 | 20863046 | 20863083 | CSAR_peak_ | 7.92          | + |
| chr1 | 20863358 | 20863420 | CSAR_peak_ | 6.87          | + |
| chr1 | 20863512 | 20863559 | CSAR_peak_ | 9.77          | + |
| chr1 | 20863652 | 20863711 | CSAR_peak_ | 8.09          | + |
| chr1 | 20863842 | 20863907 | CSAR_peak_ | 6.21,8.39     | + |
| chr1 | 20866349 | 20866399 | CSAR_peak_ | 6.21          | + |
| chr1 | 20874677 | 20874725 | CSAR_peak_ | 6.03,6.21     | + |
| chr1 | 20877464 | 20877504 | CSAR_peak_ | 6.02          | + |
| chr1 | 20877807 | 20877861 | CSAR_peak_ | 7.27,6.44     | + |
| chr1 | 20912499 | 20912546 | CSAR_peak_ | 6.21          | + |
| chr1 | 21031092 | 21031157 | CSAR_peak_ | 9.27          | + |
| chr1 | 21031357 | 21031404 | CSAR_peak_ | 6.03          | + |
| chr1 | 21031931 | 21031980 | CSAR_peak_ | 7.27          | + |
| chr1 | 21043561 | 21043708 | CSAR_peak_ | 15.28,36.8,1. | + |
| chr1 | 21043714 | 21043759 | CSAR_peak_ | 9.65          | + |
| chr1 | 21043760 | 21044030 | CSAR_peak_ | 15.45,8.39,9. | + |
| chr1 | 21044047 | 21044255 | CSAR_peak_ | 20.94,18.95   | + |
| chr1 | 21044256 | 21044435 | CSAR_peak_ | 27.61,11.07,. | + |
| chr1 | 21044453 | 21044577 | CSAR_peak_ | 6.54,18.65    | + |
| chr1 | 21044584 | 21044732 | CSAR_peak_ | 6.03,6.21     | + |
| chr1 | 21044776 | 21044815 | CSAR_peak_ | 6.57          | + |
| chr1 | 21147909 | 21147957 | CSAR_peak_ | 6.21          | + |
| chr1 | 21160072 | 21160115 | CSAR_peak_ | 6.95          | + |
| chr1 | 21162844 | 21162891 | CSAR_peak_ | 6.03          | + |
| chr1 | 21164961 | 21165028 | CSAR_peak_ | 13.48         | + |
| chr1 | 21165161 | 21165249 | CSAR_peak_ | 14.88         | + |
| chr1 | 21165797 | 21165839 | CSAR_peak_ | 6.21,8.39     | + |
| chr1 | 21166107 | 21166149 | CSAR_peak_ | 5.62          | + |
| chr1 | 21166494 | 21166560 | CSAR_peak_ | 13.48         | + |
| chr1 | 21167800 | 21167856 | CSAR_peak_ | 12.13         | + |

|      |          |          |            |               |   |
|------|----------|----------|------------|---------------|---|
| chr1 | 21167966 | 21168100 | CSAR_peak_ | 10.83,9.61    | + |
| chr1 | 21168127 | 21168174 | CSAR_peak_ | 7.58          | + |
| chr1 | 21168304 | 21168359 | CSAR_peak_ | 6.57          | + |
| chr1 | 21168455 | 21168495 | CSAR_peak_ | 6.21          | + |
| chr1 | 21169082 | 21169128 | CSAR_peak_ | 7.58          | + |
| chr1 | 21169584 | 21169687 | CSAR_peak_ | 13.48,6.52,8. | + |
| chr1 | 21169710 | 21169786 | CSAR_peak_ | 6.21,9.58     | + |
| chr1 | 21169875 | 21170036 | CSAR_peak_ | 17.51,9.55,6. | + |
| chr1 | 21170107 | 21170316 | CSAR_peak_ | 9.03,16.87    | + |
| chr1 | 21170707 | 21170775 | CSAR_peak_ | 8.28          | + |
| chr1 | 21170788 | 21170871 | CSAR_peak_ | 12.5          | + |
| chr1 | 21171377 | 21171417 | CSAR_peak_ | 8.39          | + |
| chr1 | 21171813 | 21171852 | CSAR_peak_ | 6.21          | + |
| chr1 | 21171953 | 21172021 | CSAR_peak_ | 7.27          | + |
| chr1 | 21172269 | 21172531 | CSAR_peak_ | 6.95,27.61,6. | + |
| chr1 | 21172679 | 21172735 | CSAR_peak_ | 10.83         | + |
| chr1 | 21173171 | 21173209 | CSAR_peak_ | 7.27          | + |
| chr1 | 21173435 | 21173507 | CSAR_peak_ | 8.39          | + |
| chr1 | 21173680 | 21173777 | CSAR_peak_ | 6.21          | + |
| chr1 | 21237894 | 21238104 | CSAR_peak_ | 22.26,9.95,3. | + |
| chr1 | 21238120 | 21238159 | CSAR_peak_ | 6.02          | + |
| chr1 | 21238222 | 21238345 | CSAR_peak_ | 12.31,16.33,! | + |
| chr1 | 21238361 | 21238437 | CSAR_peak_ | 13.18,26.97   | + |
| chr1 | 21238497 | 21238569 | CSAR_peak_ | 6.21,9.72     | + |
| chr1 | 21238783 | 21239062 | CSAR_peak_ | 30.19,25.13,! | + |
| chr1 | 21239086 | 21239391 | CSAR_peak_ | 43.08,73.71,! | + |
| chr1 | 21239404 | 21240394 | CSAR_peak_ | 39.49,11.57,! | + |
| chr1 | 21240396 | 21240493 | CSAR_peak_ | 45.71,25.22   | + |
| chr1 | 21240649 | 21240794 | CSAR_peak_ | 12.17,7.94,6. | + |
| chr1 | 21240863 | 21240910 | CSAR_peak_ | 12.13         | + |
| chr1 | 21241022 | 21241072 | CSAR_peak_ | 10.83         | + |
| chr1 | 21241808 | 21241896 | CSAR_peak_ | 13.09,10.17   | + |
| chr1 | 21242076 | 21242179 | CSAR_peak_ | 13.48,6.21    | + |
| chr1 | 21242229 | 21242332 | CSAR_peak_ | 12.13         | + |
| chr1 | 21243010 | 21243047 | CSAR_peak_ | 6.21          | + |
| chr1 | 21243148 | 21243243 | CSAR_peak_ | 6.52,7.78     | + |
| chr1 | 21243289 | 21243312 | CSAR_peak_ | 6.02          | + |
| chr1 | 21243584 | 21243608 | CSAR_peak_ | 8.13,14.76    | + |
| chr1 | 21243779 | 21243824 | CSAR_peak_ | 6.44          | + |
| chr1 | 21243842 | 21243897 | CSAR_peak_ | 7.92          | + |
| chr1 | 21256791 | 21256880 | CSAR_peak_ | 7.27,8.39     | + |
| chr1 | 21256968 | 21257007 | CSAR_peak_ | 6.21,8.39     | + |

|      |          |          |            |               |   |
|------|----------|----------|------------|---------------|---|
| chr1 | 21257092 | 21257189 | CSAR_peak_ | 6.57,8.39     | + |
| chr1 | 21257284 | 21257335 | CSAR_peak_ | 12.31         | + |
| chr1 | 21258198 | 21258247 | CSAR_peak_ | 8.39          | + |
| chr1 | 21572111 | 21572141 | CSAR_peak_ | 6.21          | + |
| chr1 | 21575680 | 21575735 | CSAR_peak_ | 6.21,6.21     | + |
| chr1 | 21746449 | 21746504 | CSAR_peak_ | 11.72,17.28,  | + |
| chr1 | 21746777 | 21746817 | CSAR_peak_ | 6.21          | + |
| chr1 | 21746836 | 21746904 | CSAR_peak_ | 7.58          | + |
| chr1 | 21747712 | 21747772 | CSAR_peak_ | 6.95,8.39     | + |
| chr1 | 21747889 | 21747996 | CSAR_peak_ | 8.95,7.58     | + |
| chr1 | 21748115 | 21748207 | CSAR_peak_ | 8.39,7.26     | + |
| chr1 | 21749091 | 21749161 | CSAR_peak_ | 6.94          | + |
| chr1 | 21749258 | 21749295 | CSAR_peak_ | 6.21          | + |
| chr1 | 21749987 | 21750076 | CSAR_peak_ | 10.83,7.27    | + |
| chr1 | 21751405 | 21751463 | CSAR_peak_ | 12.13         | + |
| chr1 | 21751492 | 21751547 | CSAR_peak_ | 6.21,6.57     | + |
| chr1 | 21752436 | 21752529 | CSAR_peak_ | 6.21          | + |
| chr1 | 21752984 | 21753071 | CSAR_peak_ | 9.77,11.14,1  | + |
| chr1 | 21753139 | 21753220 | CSAR_peak_ | 14.88,6.21    | + |
| chr1 | 21753359 | 21753419 | CSAR_peak_ | 8.39,7.27     | + |
| chr1 | 21753462 | 21753560 | CSAR_peak_ | 7.58,10.83,7. | + |
| chr1 | 21753884 | 21753896 | CSAR_peak_ | 6.51          | + |
| chr1 | 21753951 | 21754031 | CSAR_peak_ | 9.61,11.96    | + |
| chr1 | 21754152 | 21754188 | CSAR_peak_ | 6.21          | + |
| chr1 | 21754560 | 21754608 | CSAR_peak_ | 6.57          | + |
| chr1 | 21754792 | 21754874 | CSAR_peak_ | 9.77,6.44     | + |
| chr1 | 21755863 | 21755918 | CSAR_peak_ | 6.21          | + |
| chr1 | 21756627 | 21756672 | CSAR_peak_ | 7.27          | + |
| chr1 | 21756706 | 21756784 | CSAR_peak_ | 8.39,6.21     | + |
| chr1 | 21758372 | 21758432 | CSAR_peak_ | 9.58,18.95    | + |
| chr1 | 21760145 | 21760331 | CSAR_peak_ | 13.51,12.5,7. | + |
| chr1 | 21760516 | 21760593 | CSAR_peak_ | 8.39          | + |
| chr1 | 21760602 | 21760679 | CSAR_peak_ | 13.48,6.57    | + |
| chr1 | 21760682 | 21760717 | CSAR_peak_ | 9.58          | + |
| chr1 | 21761130 | 21761202 | CSAR_peak_ | 7.27          | + |
| chr1 | 21761222 | 21761293 | CSAR_peak_ | 7.27,14.88    | + |
| chr1 | 21761366 | 21761565 | CSAR_peak_ | 8.5,8.5,19.98 | + |
| chr1 | 21761665 | 21761784 | CSAR_peak_ | 13.48,10.83,  | + |
| chr1 | 21762834 | 21762877 | CSAR_peak_ | 9.58          | + |
| chr1 | 21763474 | 21763523 | CSAR_peak_ | 18.95         | + |
| chr1 | 21763680 | 21763724 | CSAR_peak_ | 7.34          | + |
| chr1 | 21763880 | 21763919 | CSAR_peak_ | 6.03          | + |

|      |          |          |            |               |   |
|------|----------|----------|------------|---------------|---|
| chr1 | 21764062 | 21764134 | CSAR_peak_ | 6.78          | + |
| chr1 | 21764593 | 21764661 | CSAR_peak_ | 10.83         | + |
| chr1 | 21765031 | 21765083 | CSAR_peak_ | 6.57,6.95     | + |
| chr1 | 21765215 | 21765309 | CSAR_peak_ | 12.17         | + |
| chr1 | 21780566 | 21780687 | CSAR_peak_ | 6.85,8.39     | + |
| chr1 | 21780728 | 21780797 | CSAR_peak_ | 6.21          | + |
| chr1 | 21782041 | 21782111 | CSAR_peak_ | 6.03,7.27     | + |
| chr1 | 21782135 | 21782198 | CSAR_peak_ | 6.57          | + |
| chr1 | 21792132 | 21792253 | CSAR_peak_ | 6.85,7.27     | + |
| chr1 | 21792281 | 21792363 | CSAR_peak_ | 6.57          | + |
| chr1 | 21792578 | 21792662 | CSAR_peak_ | 6.21          | + |
| chr1 | 21793095 | 21793167 | CSAR_peak_ | 7.58          | + |
| chr1 | 21793625 | 21793729 | CSAR_peak_ | 6.57,7.27     | + |
| chr1 | 21795489 | 21795595 | CSAR_peak_ | 11.28,6.02,8. | + |
| chr1 | 21795739 | 21795801 | CSAR_peak_ | 6.03          | + |
| chr1 | 21795809 | 21795834 | CSAR_peak_ | 6.44          | + |
| chr1 | 21796785 | 21796839 | CSAR_peak_ | 7.27          | + |
| chr1 | 21796974 | 21797043 | CSAR_peak_ | 11.14,10.02   | + |
| chr1 | 21797887 | 21797935 | CSAR_peak_ | 12.13         | + |
| chr1 | 21798048 | 21798138 | CSAR_peak_ | 8.39          | + |
| chr1 | 21798243 | 21798353 | CSAR_peak_ | 8.39          | + |
| chr1 | 21798765 | 21798906 | CSAR_peak_ | 13.44,14.93   | + |
| chr1 | 21799039 | 21799213 | CSAR_peak_ | 14.85,15.23   | + |
| chr1 | 21799237 | 21799326 | CSAR_peak_ | 5.62          | + |
| chr1 | 21799489 | 21799692 | CSAR_peak_ | 8.39,6.21,6.9 | + |
| chr1 | 21799998 | 21800183 | CSAR_peak_ | 7.58,8.95,8.3 | + |
| chr1 | 21800338 | 21800420 | CSAR_peak_ | 12.13,6.45,8. | + |
| chr1 | 21800445 | 21800516 | CSAR_peak_ | 6.21          | + |
| chr1 | 21800550 | 21800650 | CSAR_peak_ | 7.92,5.62,9.5 | + |
| chr1 | 21800799 | 21800885 | CSAR_peak_ | 7.92          | + |
| chr1 | 21816824 | 21816945 | CSAR_peak_ | 6.85,8.39     | + |
| chr1 | 21816986 | 21817055 | CSAR_peak_ | 6.21          | + |
| chr1 | 21818299 | 21818369 | CSAR_peak_ | 7.27,6.03     | + |
| chr1 | 21818393 | 21818456 | CSAR_peak_ | 6.57          | + |
| chr1 | 21828390 | 21828511 | CSAR_peak_ | 6.85,7.27     | + |
| chr1 | 21828539 | 21828621 | CSAR_peak_ | 6.57          | + |
| chr1 | 21828836 | 21828920 | CSAR_peak_ | 6.21          | + |
| chr1 | 21829353 | 21829425 | CSAR_peak_ | 7.58          | + |
| chr1 | 21829883 | 21829987 | CSAR_peak_ | 6.57,7.27     | + |
| chr1 | 21831747 | 21831853 | CSAR_peak_ | 11.63,10.83   | + |
| chr1 | 21831904 | 21832073 | CSAR_peak_ | 16.34,20.94,  | + |
| chr1 | 21834145 | 21834193 | CSAR_peak_ | 12.13         | + |



|      |          |          |            |                |   |
|------|----------|----------|------------|----------------|---|
| chr1 | 21834306 | 21834396 | CSAR_peak_ | 8.39           | + |
| chr1 | 21834501 | 21834611 | CSAR_peak_ | 8.39           | + |
| chr1 | 21835023 | 21835164 | CSAR_peak_ | 13.44,14.93    | + |
| chr1 | 21835297 | 21835471 | CSAR_peak_ | 14.85,15.23    | + |
| chr1 | 21835495 | 21835584 | CSAR_peak_ | 5.62           | + |
| chr1 | 21835747 | 21835950 | CSAR_peak_ | 8.39,6.21,6.9  | + |
| chr1 | 21836256 | 21836441 | CSAR_peak_ | 7.58,8.95,8.3  | + |
| chr1 | 21836596 | 21836678 | CSAR_peak_ | 12.13,6.45,8.  | + |
| chr1 | 21836703 | 21836774 | CSAR_peak_ | 6.21           | + |
| chr1 | 21836808 | 21836908 | CSAR_peak_ | 7.92,5.62,9.5  | + |
| chr1 | 21837057 | 21837143 | CSAR_peak_ | 7.92           | + |
| chr1 | 21865316 | 21865359 | CSAR_peak_ | 7.92           | + |
| chr1 | 21894259 | 21894309 | CSAR_peak_ | 9.58           | + |
| chr1 | 21894882 | 21894944 | CSAR_peak_ | 8.39,6.21      | + |
| chr1 | 21895164 | 21895219 | CSAR_peak_ | 9.58,21.27,10. | + |
| chr1 | 21895357 | 21895394 | CSAR_peak_ | 7.27           | + |
| chr1 | 21895649 | 21895697 | CSAR_peak_ | 8.39,6.03      | + |
| chr1 | 21896411 | 21896478 | CSAR_peak_ | 9.03           | + |
| chr1 | 21896875 | 21896922 | CSAR_peak_ | 6.1            | + |
| chr1 | 21897555 | 21897622 | CSAR_peak_ | 6.95           | + |
| chr1 | 21898961 | 21899017 | CSAR_peak_ | 6.21           | + |
| chr1 | 21899329 | 21899400 | CSAR_peak_ | 7.27           | + |
| chr1 | 21899495 | 21899558 | CSAR_peak_ | 8.39           | + |
| chr1 | 21900368 | 21900428 | CSAR_peak_ | 10.83,13.29    | + |
| chr1 | 21900542 | 21900554 | CSAR_peak_ | 10.33          | + |
| chr1 | 21904210 | 21904290 | CSAR_peak_ | 7.27,8.39      | + |
| chr1 | 21980384 | 21980436 | CSAR_peak_ | 9.58,7.27      | + |
| chr1 | 21981388 | 21981453 | CSAR_peak_ | 8.65           | + |
| chr1 | 21982029 | 21982091 | CSAR_peak_ | 7.34,6.21      | + |
| chr1 | 21982419 | 21982529 | CSAR_peak_ | 9.77,9.27,7.9  | + |
| chr1 | 21982629 | 21982644 | CSAR_peak_ | 8.39           | + |
| chr1 | 21983318 | 21983361 | CSAR_peak_ | 6.21           | + |
| chr1 | 21983501 | 21983542 | CSAR_peak_ | 7.27,13.44     | + |
| chr1 | 21983707 | 21983760 | CSAR_peak_ | 7.58,6.03      | + |
| chr1 | 21983815 | 21983879 | CSAR_peak_ | 21.94,12.5     | + |
| chr1 | 21984025 | 21984038 | CSAR_peak_ | 6.57           | + |
| chr1 | 21984220 | 21984278 | CSAR_peak_ | 9.58           | + |
| chr1 | 21984337 | 21984384 | CSAR_peak_ | 6.21           | + |
| chr1 | 22011522 | 22011566 | CSAR_peak_ | 6.57           | + |
| chr1 | 22011931 | 22011966 | CSAR_peak_ | 12.13          | + |
| chr1 | 22012713 | 22012780 | CSAR_peak_ | 7.27,9.77      | + |
| chr1 | 22013574 | 22013620 | CSAR_peak_ | 7.68           | + |

|      |          |          |             |               |   |
|------|----------|----------|-------------|---------------|---|
| chr1 | 22013743 | 22013776 | CSAR_peak_  | 6.1           | + |
| chr1 | 22013784 | 22013840 | CSAR_peak_! | 17.67,7.58    | + |
| chr1 | 22014466 | 22014516 | CSAR_peak_  | 6.21          | + |
| chr1 | 22014766 | 22014812 | CSAR_peak_  | 7.27,6.21     | + |
| chr1 | 22015001 | 22015012 | CSAR_peak_  | 6.21          | + |
| chr1 | 22015040 | 22015135 | CSAR_peak_  | 8.39          | + |
| chr1 | 22015245 | 22015321 | CSAR_peak_  | 8.39          | + |
| chr1 | 22015609 | 22015686 | CSAR_peak_  | 14.88         | + |
| chr1 | 22015883 | 22016020 | CSAR_peak_  | 6.21,10.95,7. | + |
| chr1 | 22016197 | 22016214 | CSAR_peak_  | 6.21          | + |
| chr1 | 22016553 | 22016655 | CSAR_peak_  | 10.95         | + |
| chr1 | 22016910 | 22016977 | CSAR_peak_  | 11.14,8.39    | + |
| chr1 | 22017096 | 22017132 | CSAR_peak_  | 6.45,12.31    | + |
| chr1 | 22017201 | 22017240 | CSAR_peak_  | 22.56         | + |
| chr1 | 22017330 | 22017423 | CSAR_peak_  | 10.95,10.18,  | + |
| chr1 | 22017587 | 22017691 | CSAR_peak_  | 8.39,9.32     | + |
| chr1 | 22017726 | 22017765 | CSAR_peak_  | 5.62,9.58     | + |
| chr1 | 22017886 | 22017933 | CSAR_peak_! | 7.58,12.13    | + |
| chr1 | 22018110 | 22018163 | CSAR_peak_  | 6.21,7.27     | + |
| chr1 | 22018235 | 22018268 | CSAR_peak_  | 7.27          | + |
| chr1 | 22018885 | 22018929 | CSAR_peak_  | 9.58          | + |
| chr1 | 22019321 | 22019406 | CSAR_peak_  | 7.27          | + |
| chr1 | 22019632 | 22019822 | CSAR_peak_  | 8.39,10.31,6. | + |
| chr1 | 22034723 | 22034817 | CSAR_peak_  | 13.44         | + |
| chr1 | 22034948 | 22034986 | CSAR_peak_  | 7.92          | + |
| chr1 | 22035056 | 22035099 | CSAR_peak_  | 7.73          | + |
| chr1 | 22035448 | 22035608 | CSAR_peak_  | 15.76,12.84,  | + |
| chr1 | 22035646 | 22035735 | CSAR_peak_  | 21.22,7.7     | + |
| chr1 | 22035919 | 22036023 | CSAR_peak_! | 31.73,14.76,  | + |
| chr1 | 22036109 | 22036141 | CSAR_peak_  | 7.73          | + |
| chr1 | 22036189 | 22036315 | CSAR_peak_  | 10.83         | + |
| chr1 | 22036348 | 22036401 | CSAR_peak_  | 10.31         | + |
| chr1 | 22036457 | 22036539 | CSAR_peak_  | 13.32,8.02    | + |
| chr1 | 22036618 | 22036647 | CSAR_peak_  | 7.58          | + |
| chr1 | 22037187 | 22037199 | CSAR_peak_  | 6.37          | + |
| chr1 | 22037203 | 22037333 | CSAR_peak_  | 8.92,16.19,1  | + |
| chr1 | 22037337 | 22037494 | CSAR_peak_  | 9.89,10.95,1  | + |
| chr1 | 22037495 | 22037601 | CSAR_peak_! | 11.14,10.83,  | + |
| chr1 | 22037641 | 22037678 | CSAR_peak_! | 8.25,20.44    | + |
| chr1 | 22037727 | 22037827 | CSAR_peak_! | 27.73,13.48,  | + |
| chr1 | 22037851 | 22037922 | CSAR_peak_! | 8.16,6.72,11. | + |
| chr1 | 22037948 | 22038031 | CSAR_peak_! | 7.58,8.95,17. | + |

|      |          |          |             |               |   |
|------|----------|----------|-------------|---------------|---|
| chr1 | 22038078 | 22038108 | CSAR_peak_! | 7.65          | + |
| chr1 | 22038175 | 22038239 | CSAR_peak_! | 14.63         | + |
| chr1 | 22038289 | 22038391 | CSAR_peak_! | 12.52         | + |
| chr1 | 22038416 | 22038468 | CSAR_peak_! | 6.45          | + |
| chr1 | 22038471 | 22038498 | CSAR_peak_! | 6.12          | + |
| chr1 | 22038654 | 22038672 | CSAR_peak_! | 6.37          | + |
| chr1 | 22038699 | 22038733 | CSAR_peak_! | 6.57          | + |
| chr1 | 22038808 | 22038829 | CSAR_peak_! | 8.39          | + |
| chr1 | 22038845 | 22039133 | CSAR_peak_! | 21.37,24.21,  | + |
| chr1 | 22039287 | 22039312 | CSAR_peak_! | 6.03          | + |
| chr1 | 22039586 | 22039625 | CSAR_peak_! | 13            | + |
| chr1 | 22045338 | 22045405 | CSAR_peak_! | 6.21          | + |
| chr1 | 22046937 | 22046973 | CSAR_peak_! | 8.39          | + |
| chr1 | 22047209 | 22047247 | CSAR_peak_! | 6.21          | + |
| chr1 | 22052004 | 22052039 | CSAR_peak_! | 10.95         | + |
| chr1 | 22052618 | 22052654 | CSAR_peak_! | 6.03          | + |
| chr1 | 22053277 | 22053327 | CSAR_peak_! | 7.27          | + |
| chr1 | 22193386 | 22193425 | CSAR_peak_! | 8.95          | + |
| chr1 | 22199065 | 22199115 | CSAR_peak_! | 13.48         | + |
| chr1 | 22199520 | 22199812 | CSAR_peak_! | 9.02,9.27,11. | + |
| chr1 | 22200056 | 22200074 | CSAR_peak_! | 8.39          | + |
| chr1 | 22200091 | 22200147 | CSAR_peak_! | 6.64          | + |
| chr1 | 22200162 | 22200222 | CSAR_peak_! | 7.27          | + |
| chr1 | 22200247 | 22200327 | CSAR_peak_! | 8.65          | + |
| chr1 | 22200328 | 22200417 | CSAR_peak_! | 6.87,6.21     | + |
| chr1 | 22200980 | 22201056 | CSAR_peak_! | 8.39          | + |
| chr1 | 22203677 | 22203760 | CSAR_peak_! | 14.88         | + |
| chr1 | 22203773 | 22203834 | CSAR_peak_! | 9.58          | + |
| chr1 | 22203892 | 22203980 | CSAR_peak_! | 6.21          | + |
| chr1 | 22204966 | 22205111 | CSAR_peak_! | 7.27,6.57,6.9 | + |
| chr1 | 22209626 | 22209673 | CSAR_peak_! | 6.95          | + |
| chr1 | 22209858 | 22209884 | CSAR_peak_! | 6.44          | + |
| chr1 | 22210216 | 22210262 | CSAR_peak_! | 13.44         | + |
| chr1 | 22210268 | 22210297 | CSAR_peak_! | 6.95          | + |
| chr1 | 22211678 | 22211723 | CSAR_peak_! | 8.39,7.58     | + |
| chr1 | 22344669 | 22344735 | CSAR_peak_! | 9.27,9.58,7.3 | + |
| chr1 | 22424472 | 22424686 | CSAR_peak_! | 14.92,5.94,8. | + |
| chr1 | 22424769 | 22424802 | CSAR_peak_! | 6.95,9.58     | + |
| chr1 | 22424836 | 22424919 | CSAR_peak_! | 9.41,8.92,7.2 | + |
| chr1 | 22425229 | 22425287 | CSAR_peak_! | 6.95,9.97     | + |
| chr1 | 22425802 | 22425881 | CSAR_peak_! | 8.13          | + |
| chr1 | 22426575 | 22426650 | CSAR_peak_! | 7.89,6.36,7.2 | + |

|      |          |          |            |                  |
|------|----------|----------|------------|------------------|
| chr1 | 22427279 | 22427415 | CSAR_peak_ | 9.58,11.16,14.4  |
| chr1 | 22427522 | 22427580 | CSAR_peak_ | 8.13 +           |
| chr1 | 22428240 | 22428331 | CSAR_peak_ | 37.66,40.91,44.1 |
| chr1 | 22444761 | 22444818 | CSAR_peak_ | 7.27 +           |
| chr1 | 22444821 | 22444850 | CSAR_peak_ | 6.21 +           |
| chr1 | 22565829 | 22565880 | CSAR_peak_ | 20.94 +          |
| chr1 | 22568435 | 22568475 | CSAR_peak_ | 6.03 +           |
| chr1 | 22570646 | 22570702 | CSAR_peak_ | 7.27 +           |
| chr1 | 22586628 | 22586674 | CSAR_peak_ | 6.95 +           |
| chr1 | 22587577 | 22587596 | CSAR_peak_ | 9.58 +           |
| chr1 | 22588583 | 22588612 | CSAR_peak_ | 6.45 +           |
| chr1 | 22603165 | 22603188 | CSAR_peak_ | 8.61 +           |
| chr1 | 22603195 | 22603244 | CSAR_peak_ | 94.83,34.75 +    |
| chr1 | 22628332 | 22628397 | CSAR_peak_ | 10.94,13.44,16.8 |
| chr1 | 22628454 | 22628550 | CSAR_peak_ | 9.54,17.52,19.9  |
| chr1 | 22628724 | 22628793 | CSAR_peak_ | 7.9,13.37,8.6 +  |
| chr1 | 22629026 | 22629100 | CSAR_peak_ | 8.39 +           |
| chr1 | 22629135 | 22629179 | CSAR_peak_ | 10.95 +          |
| chr1 | 22629277 | 22629587 | CSAR_peak_ | 22.56,17.68,15.1 |
| chr1 | 22629618 | 22629652 | CSAR_peak_ | 6.75 +           |
| chr1 | 22629811 | 22629853 | CSAR_peak_ | 8.39,6.95 +      |
| chr1 | 22629889 | 22629985 | CSAR_peak_ | 11.14,13.48 +    |
| chr1 | 22700115 | 22700117 | CSAR_peak_ | 7.27 +           |
| chr1 | 22700576 | 22700642 | CSAR_peak_ | 6.22,7.2 +       |
| chr1 | 22770906 | 22770955 | CSAR_peak_ | 7.27 +           |
| chr1 | 22772188 | 22772238 | CSAR_peak_ | 6.21 +           |
| chr1 | 22835699 | 22835754 | CSAR_peak_ | 11.14 +          |
| chr1 | 22836999 | 22837055 | CSAR_peak_ | 11.14 +          |
| chr1 | 22837581 | 22837690 | CSAR_peak_ | 14.76 +          |
| chr1 | 22837800 | 22837833 | CSAR_peak_ | 7.27 +           |
| chr1 | 22837998 | 22838106 | CSAR_peak_ | 6.21,6.95 +      |
| chr1 | 22856398 | 22856452 | CSAR_peak_ | 7.92 +           |
| chr1 | 22856482 | 22856541 | CSAR_peak_ | 7.92,7.58 +      |
| chr1 | 22858204 | 22858275 | CSAR_peak_ | 8.39,8.39 +      |
| chr1 | 22858357 | 22858435 | CSAR_peak_ | 6.21,6.57 +      |
| chr1 | 22861413 | 22861503 | CSAR_peak_ | 10.83 +          |
| chr1 | 22861917 | 22861971 | CSAR_peak_ | 11.14 +          |
| chr1 | 23047862 | 23047900 | CSAR_peak_ | 6.21 +           |
| chr1 | 23048837 | 23048887 | CSAR_peak_ | 6.21 +           |
| chr1 | 23082354 | 23082397 | CSAR_peak_ | 9.77 +           |
| chr1 | 23082605 | 23082623 | CSAR_peak_ | 6.02 +           |
| chr1 | 23082672 | 23082723 | CSAR_peak_ | 12.31 +          |

|      |          |          |            |               |   |
|------|----------|----------|------------|---------------|---|
| chr1 | 23083230 | 23083379 | CSAR_peak_ | 10.53,8.39    | + |
| chr1 | 23083766 | 23083832 | CSAR_peak_ | 8.39          | + |
| chr1 | 23083898 | 23083957 | CSAR_peak_ | 11.38         | + |
| chr1 | 23084046 | 23084095 | CSAR_peak_ | 6.45,6.21     | + |
| chr1 | 23129217 | 23129296 | CSAR_peak_ | 6.21          | + |
| chr1 | 23129313 | 23129412 | CSAR_peak_ | 7.58          | + |
| chr1 | 23169176 | 23169313 | CSAR_peak_ | 11.63,14.22   | + |
| chr1 | 23169476 | 23169542 | CSAR_peak_ | 6.03          | + |
| chr1 | 23169634 | 23169759 | CSAR_peak_ | 8.39,9.03,18. | + |
| chr1 | 23169806 | 23169898 | CSAR_peak_ | 28.34,23.49,  | + |
| chr1 | 23170018 | 23170068 | CSAR_peak_ | 6.21          | + |
| chr1 | 23170127 | 23170175 | CSAR_peak_ | 8.65          | + |
| chr1 | 23170526 | 23170792 | CSAR_peak_ | 11.66,13.6,9. | + |
| chr1 | 23171075 | 23171190 | CSAR_peak_ | 6.21,7.58,8.9 | + |
| chr1 | 23171297 | 23171337 | CSAR_peak_ | 6.37          | + |
| chr1 | 23171366 | 23171437 | CSAR_peak_ | 6.54          | + |
| chr1 | 23171572 | 23171736 | CSAR_peak_ | 20.13,14.88   | + |
| chr1 | 23172315 | 23172365 | CSAR_peak_ | 8.39          | + |
| chr1 | 23180130 | 23180203 | CSAR_peak_ | 6.21          | + |
| chr1 | 23180570 | 23180633 | CSAR_peak_ | 6.21          | + |
| chr1 | 23202437 | 23202533 | CSAR_peak_ | 9.77,6.21     | + |
| chr1 | 23202628 | 23202657 | CSAR_peak_ | 6.44          | + |
| chr1 | 23202712 | 23202751 | CSAR_peak_ | 6.21          | + |
| chr1 | 23203009 | 23203038 | CSAR_peak_ | 6.21          | + |
| chr1 | 23203153 | 23203208 | CSAR_peak_ | 7.27          | + |
| chr1 | 23337695 | 23337750 | CSAR_peak_ | 9.77,8.39     | + |
| chr1 | 23339258 | 23339327 | CSAR_peak_ | 6.57,7.27     | + |
| chr1 | 23339459 | 23339523 | CSAR_peak_ | 7.27,7.27     | + |
| chr1 | 23526180 | 23526234 | CSAR_peak_ | 6.02,9.58     | + |
| chr1 | 23557412 | 23557493 | CSAR_peak_ | 7.27          | + |
| chr1 | 23618579 | 23618632 | CSAR_peak_ | 6.57          | + |
| chr1 | 23619020 | 23619065 | CSAR_peak_ | 6.85          | + |
| chr1 | 23620021 | 23620070 | CSAR_peak_ | 6.21          | + |
| chr1 | 23620751 | 23620814 | CSAR_peak_ | 9.58,8.39     | + |
| chr1 | 23621209 | 23621268 | CSAR_peak_ | 18.73,16.11   | + |
| chr1 | 23621633 | 23621676 | CSAR_peak_ | 6.21,6.03     | + |
| chr1 | 23622002 | 23622046 | CSAR_peak_ | 7.26          | + |
| chr1 | 23651223 | 23651287 | CSAR_peak_ | 6.21          | + |
| chr1 | 23651376 | 23651425 | CSAR_peak_ | 6.21,6.57     | + |
| chr1 | 23653669 | 23653715 | CSAR_peak_ | 12.31,10.95   | + |
| chr1 | 23654915 | 23654979 | CSAR_peak_ | 5.62,8.65     | + |
| chr1 | 23685266 | 23685300 | CSAR_peak_ | 7.58,8.39     | + |

|      |          |          |             |               |   |
|------|----------|----------|-------------|---------------|---|
| chr1 | 23685389 | 23685509 | CSAR_peak_  | 7.12,9.58     | + |
| chr1 | 23685588 | 23685631 | CSAR_peak_  | 6.21          | + |
| chr1 | 23685771 | 23685842 | CSAR_peak_  | 9.77,8.13     | + |
| chr1 | 23685914 | 23685931 | CSAR_peak_! | 5.67          | + |
| chr1 | 23686630 | 23686687 | CSAR_peak_  | 12.13,6.57    | + |
| chr1 | 23687214 | 23687261 | CSAR_peak_  | 10.83         | + |
| chr1 | 23701192 | 23701306 | CSAR_peak_! | 81.13,97.16,; | + |
| chr1 | 23730402 | 23730446 | CSAR_peak_! | 6.57          | + |
| chr1 | 23730476 | 23730539 | CSAR_peak_! | 8.28          | + |
| chr1 | 23730935 | 23730988 | CSAR_peak_! | 6.03          | + |
| chr1 | 23731599 | 23731665 | CSAR_peak_! | 9.27          | + |
| chr1 | 23732061 | 23732131 | CSAR_peak_  | 13.48         | + |
| chr1 | 23732302 | 23732343 | CSAR_peak_  | 6.21          | + |
| chr1 | 23732628 | 23732664 | CSAR_peak_  | 7.27          | + |
| chr1 | 23740850 | 23740894 | CSAR_peak_  | 6.21          | + |
| chr1 | 23741912 | 23741954 | CSAR_peak_  | 8.39          | + |
| chr1 | 23771500 | 23771547 | CSAR_peak_! | 5.62          | + |
| chr1 | 23772093 | 23772157 | CSAR_peak_  | 14.88         | + |
| chr1 | 23772717 | 23772724 | CSAR_peak_  | 8.39          | + |
| chr1 | 23774407 | 23774453 | CSAR_peak_  | 8.39,7.92     | + |
| chr1 | 23775387 | 23775432 | CSAR_peak_  | 6.21          | + |
| chr1 | 23775522 | 23775577 | CSAR_peak_  | 7.27          | + |
| chr1 | 23790547 | 23790598 | CSAR_peak_! | 5.62,6.95     | + |
| chr1 | 23833622 | 23833682 | CSAR_peak_! | 15.43,13.37,; | + |
| chr1 | 23833771 | 23833789 | CSAR_peak_  | 7.58          | + |
| chr1 | 23833809 | 23833842 | CSAR_peak_  | 6.44          | + |
| chr1 | 23834821 | 23834884 | CSAR_peak_! | 10.62,9.77    | + |
| chr1 | 23933891 | 23933956 | CSAR_peak_  | 7.27          | + |
| chr1 | 23936085 | 23936123 | CSAR_peak_  | 8.13          | + |
| chr1 | 23936274 | 23936299 | CSAR_peak_  | 5.95          | + |
| chr1 | 23938464 | 23938504 | CSAR_peak_  | 7.27          | + |
| chr1 | 23939104 | 23939148 | CSAR_peak_! | 10.7,5.62     | + |
| chr1 | 23939488 | 23939531 | CSAR_peak_! | 7.58          | + |
| chr1 | 23953774 | 23953796 | CSAR_peak_  | 6.21          | + |
| chr1 | 23953950 | 23954028 | CSAR_peak_! | 7.92,7.58     | + |
| chr1 | 23954088 | 23954189 | CSAR_peak_! | 10.02,7.58    | + |
| chr1 | 23960848 | 23960894 | CSAR_peak_  | 7.27,5.62     | + |
| chr1 | 23961025 | 23961096 | CSAR_peak_  | 10.83         | + |
| chr1 | 23979476 | 23979538 | CSAR_peak_  | 6.21          | + |
| chr1 | 23983653 | 23983736 | CSAR_peak_  | 12.13         | + |
| chr1 | 24029011 | 24029061 | CSAR_peak_  | 9.61          | + |
| chr1 | 24030020 | 24030033 | CSAR_peak_  | 6.21          | + |

|      |          |          |             |               |   |
|------|----------|----------|-------------|---------------|---|
| chr1 | 24045019 | 24045042 | CSAR_peak_  | 8.39          | + |
| chr1 | 24045215 | 24045266 | CSAR_peak_! | 7.68          | + |
| chr1 | 24087984 | 24088070 | CSAR_peak_  | 6.21          | + |
| chr1 | 24100650 | 24100689 | CSAR_peak_! | 6.03          | + |
| chr1 | 24128984 | 24129031 | CSAR_peak_! | 6.03          | + |
| chr1 | 24190884 | 24190929 | CSAR_peak_! | 9.87          | + |
| chr1 | 24228288 | 24228343 | CSAR_peak_  | 6.21          | + |
| chr1 | 24228419 | 24228474 | CSAR_peak_  | 12.13         | + |
| chr1 | 24229566 | 24229624 | CSAR_peak_  | 6.21          | + |
| chr1 | 24230222 | 24230275 | CSAR_peak_  | 7.27          | + |
| chr1 | 24239625 | 24239700 | CSAR_peak_! | 13.51,9.61,6. | + |
| chr1 | 24244232 | 24244299 | CSAR_peak_  | 7.06          | + |
| chr1 | 24246811 | 24246866 | CSAR_peak_  | 6.21          | + |
| chr1 | 24292807 | 24292870 | CSAR_peak_  | 14.88         | + |
| chr1 | 24293187 | 24293233 | CSAR_peak_  | 14.88         | + |
| chr1 | 24294314 | 24294405 | CSAR_peak_  | 14.88,7.34    | + |
| chr1 | 24296459 | 24296503 | CSAR_peak_  | 7.34,6.03     | + |
| chr1 | 24296972 | 24297035 | CSAR_peak_  | 12.13         | + |
| chr1 | 24297118 | 24297128 | CSAR_peak_  | 8.65          | + |
| chr1 | 24297155 | 24297175 | CSAR_peak_  | 6.95          | + |
| chr1 | 24297351 | 24297422 | CSAR_peak_  | 7.73          | + |
| chr1 | 24359527 | 24359568 | CSAR_peak_  | 8.39          | + |
| chr1 | 24359693 | 24359782 | CSAR_peak_  | 6.21,7.27     | + |
| chr1 | 24389178 | 24389227 | CSAR_peak_  | 9.58          | + |
| chr1 | 24390525 | 24390586 | CSAR_peak_  | 9.77          | + |
| chr1 | 24390666 | 24390722 | CSAR_peak_  | 6.21,12.13    | + |
| chr1 | 24475156 | 24475229 | CSAR_peak_  | 6.21          | + |
| chr1 | 24486616 | 24486683 | CSAR_peak_  | 9.58          | + |
| chr1 | 24486809 | 24486867 | CSAR_peak_  | 6.21          | + |
| chr1 | 24539076 | 24539137 | CSAR_peak_  | 14.88         | + |
| chr1 | 24539673 | 24539729 | CSAR_peak_  | 6.22,7.27     | + |
| chr1 | 24540107 | 24540148 | CSAR_peak_  | 6.57          | + |
| chr1 | 24540256 | 24540293 | CSAR_peak_  | 7.27          | + |
| chr1 | 24540505 | 24540558 | CSAR_peak_  | 6.02          | + |
| chr1 | 24540657 | 24540752 | CSAR_peak_  | 12.13         | + |
| chr1 | 24540798 | 24540849 | CSAR_peak_! | 6.57          | + |
| chr1 | 24541092 | 24541131 | CSAR_peak_  | 15.43         | + |
| chr1 | 24541214 | 24541258 | CSAR_peak_  | 6.51          | + |
| chr1 | 24541452 | 24541506 | CSAR_peak_  | 6.94          | + |
| chr1 | 24552104 | 24552177 | CSAR_peak_  | 9.79,8.61,11. | + |
| chr1 | 24552248 | 24552337 | CSAR_peak_  | 10.88,15      | + |
| chr1 | 24552610 | 24552696 | CSAR_peak_  | 10.52,28.96,  | + |

|      |          |          |            |               |   |
|------|----------|----------|------------|---------------|---|
| chr1 | 24552830 | 24552897 | CSAR_peak_ | 7.27          | + |
| chr1 | 24553036 | 24553150 | CSAR_peak_ | 10.83,9.58,6. | + |
| chr1 | 24553290 | 24553340 | CSAR_peak_ | 10.83         | + |
| chr1 | 24553465 | 24553534 | CSAR_peak_ | 8.39,8.65     | + |
| chr1 | 24554040 | 24554141 | CSAR_peak_ | 8.65,6.03     | + |
| chr1 | 24554197 | 24554291 | CSAR_peak_ | 10.95         | + |
| chr1 | 24554388 | 24554442 | CSAR_peak_ | 10.02         | + |
| chr1 | 24555708 | 24555811 | CSAR_peak_ | 7.27          | + |
| chr1 | 24555834 | 24555970 | CSAR_peak_ | 6.03,19.36,8. | + |
| chr1 | 24556047 | 24556075 | CSAR_peak_ | 6.45          | + |
| chr1 | 24556196 | 24556246 | CSAR_peak_ | 9.58          | + |
| chr1 | 24556319 | 24556399 | CSAR_peak_ | 10.31,6.03    | + |
| chr1 | 24556790 | 24556901 | CSAR_peak_ | 8.39,6.57     | + |
| chr1 | 24557134 | 24557256 | CSAR_peak_ | 12.31,5.62    | + |
| chr1 | 24557258 | 24557313 | CSAR_peak_ | 7.27          | + |
| chr1 | 24633064 | 24633132 | CSAR_peak_ | 7.27          | + |
| chr1 | 24633321 | 24633549 | CSAR_peak_ | 10.02,6.57,9. | + |
| chr1 | 24633735 | 24633786 | CSAR_peak_ | 6.21          | + |
| chr1 | 24633919 | 24634114 | CSAR_peak_ | 8.39,10.95,7. | + |
| chr1 | 24634364 | 24634414 | CSAR_peak_ | 7.27          | + |
| chr1 | 24637509 | 24637542 | CSAR_peak_ | 6.95          | + |
| chr1 | 24648166 | 24648331 | CSAR_peak_ | 6.44          | + |
| chr1 | 24648366 | 24648503 | CSAR_peak_ | 17.37,14.85   | + |
| chr1 | 24648757 | 24648810 | CSAR_peak_ | 6.21,7.58     | + |
| chr1 | 24735084 | 24735166 | CSAR_peak_ | 9.58          | + |
| chr1 | 24735185 | 24735226 | CSAR_peak_ | 7.58          | + |
| chr1 | 24736744 | 24736800 | CSAR_peak_ | 6.85,6.57     | + |
| chr1 | 24739619 | 24739672 | CSAR_peak_ | 9.58          | + |
| chr1 | 24839184 | 24839218 | CSAR_peak_ | 7.73          | + |
| chr1 | 24839531 | 24839651 | CSAR_peak_ | 13.48,9.77    | + |
| chr1 | 24840007 | 24840043 | CSAR_peak_ | 7.29          | + |
| chr1 | 24840168 | 24840211 | CSAR_peak_ | 10.31         | + |
| chr1 | 24840217 | 24840272 | CSAR_peak_ | 8.84,12.98    | + |
| chr1 | 24893257 | 24893335 | CSAR_peak_ | 9.77          | + |
| chr1 | 24902101 | 24902176 | CSAR_peak_ | 9.03,12.31    | + |
| chr1 | 24902206 | 24902518 | CSAR_peak_ | 21.22,8.65,9. | + |
| chr1 | 24902605 | 24902632 | CSAR_peak_ | 7.27          | + |
| chr1 | 24902660 | 24902852 | CSAR_peak_ | 11.38,24.52,; | + |
| chr1 | 24902890 | 24902933 | CSAR_peak_ | 9.03          | + |
| chr1 | 24903011 | 24903026 | CSAR_peak_ | 6.21          | + |
| chr1 | 24903054 | 24903095 | CSAR_peak_ | 7.27          | + |
| chr1 | 24903320 | 24903383 | CSAR_peak_ | 8.39,6.02,7.3 | + |



|      |          |          |            |                  |   |
|------|----------|----------|------------|------------------|---|
| chr1 | 24903385 | 24903408 | CSAR_peak_ | 9.31             | + |
| chr1 | 24903469 | 24903541 | CSAR_peak_ | 13.76,6.72       | + |
| chr1 | 24903629 | 24903688 | CSAR_peak_ | 8.72             | + |
| chr1 | 24903735 | 24903740 | CSAR_peak_ | 8.09             | + |
| chr1 | 24903775 | 24903829 | CSAR_peak_ | 7.92,7.92,9.5    | + |
| chr1 | 24903887 | 24903935 | CSAR_peak_ | 12.13            | + |
| chr1 | 24903963 | 24904061 | CSAR_peak_ | 10.83,8.95,10.83 | + |
| chr1 | 24904127 | 24904153 | CSAR_peak_ | 12.35            | + |
| chr1 | 25039284 | 25039325 | CSAR_peak_ | 7.27             | + |
| chr1 | 25230713 | 25230754 | CSAR_peak_ | 6.21             | + |
| chr1 | 25235838 | 25235877 | CSAR_peak_ | 6.57             | + |
| chr1 | 25236225 | 25236275 | CSAR_peak_ | 6.21             | + |
| chr1 | 25262307 | 25262361 | CSAR_peak_ | 6.22,8.39,6.1    | + |
| chr1 | 25262578 | 25262675 | CSAR_peak_ | 94.6,9.38,11.4   | + |
| chr1 | 25263280 | 25263340 | CSAR_peak_ | 13.6,6.21        | + |
| chr1 | 25263463 | 25263493 | CSAR_peak_ | 7.58             | + |
| chr1 | 25263583 | 25263602 | CSAR_peak_ | 6.03             | + |
| chr1 | 25320129 | 25320214 | CSAR_peak_ | 11.38            | + |
| chr1 | 25321574 | 25321654 | CSAR_peak_ | 7.27             | + |
| chr1 | 25322090 | 25322175 | CSAR_peak_ | 6.21,8.39        | + |
| chr1 | 25322253 | 25322357 | CSAR_peak_ | 13.44,6.87       | + |
| chr1 | 25322431 | 25322545 | CSAR_peak_ | 17.35,9.58       | + |
| chr1 | 25323203 | 25323271 | CSAR_peak_ | 8.39             | + |
| chr1 | 25323983 | 25324022 | CSAR_peak_ | 8.09             | + |
| chr1 | 25375393 | 25375449 | CSAR_peak_ | 8.95             | + |
| chr1 | 25440857 | 25440915 | CSAR_peak_ | 6.21             | + |
| chr1 | 25459967 | 25460012 | CSAR_peak_ | 7.27             | + |
| chr1 | 25461621 | 25461679 | CSAR_peak_ | 8.39             | + |
| chr1 | 25466046 | 25466174 | CSAR_peak_ | 10.83,6.21       | + |
| chr1 | 25466395 | 25466464 | CSAR_peak_ | 12.13            | + |
| chr1 | 25467606 | 25467655 | CSAR_peak_ | 6.21             | + |
| chr1 | 25494252 | 25494287 | CSAR_peak_ | 6.03             | + |
| chr1 | 25494603 | 25494673 | CSAR_peak_ | 6.57             | + |
| chr1 | 25494735 | 25494794 | CSAR_peak_ | 7.58             | + |
| chr1 | 25495258 | 25495311 | CSAR_peak_ | 6.95             | + |
| chr1 | 25495463 | 25495510 | CSAR_peak_ | 9.58             | + |
| chr1 | 25498476 | 25498556 | CSAR_peak_ | 6.21,7.92        | + |
| chr1 | 25498677 | 25498749 | CSAR_peak_ | 17.82,8.39       | + |
| chr1 | 25499070 | 25499144 | CSAR_peak_ | 8.39             | + |
| chr1 | 25499691 | 25499732 | CSAR_peak_ | 9.58             | + |
| chr1 | 25499813 | 25499894 | CSAR_peak_ | 16.33,9.77,10.83 | + |
| chr1 | 25499954 | 25499963 | CSAR_peak_ | 8.13             | + |

|      |          |          |             |                |   |
|------|----------|----------|-------------|----------------|---|
| chr1 | 25508705 | 25508740 | CSAR_peak_  | 7.58           | + |
| chr1 | 25508753 | 25508777 | CSAR_peak_  | 6.62           | + |
| chr1 | 25508778 | 25508873 | CSAR_peak_! | 6.01,6.51      | + |
| chr1 | 25508962 | 25509216 | CSAR_peak_  | 9.27,5.62,11.  | + |
| chr1 | 25509345 | 25509553 | CSAR_peak_  | 20.94,13.44    | + |
| chr1 | 25509559 | 25509754 | CSAR_peak_! | 24.16,8.99,2(+ |   |
| chr1 | 25509857 | 25509916 | CSAR_peak_  | 7.27           | + |
| chr1 | 25509944 | 25509984 | CSAR_peak_  | 6.21           | + |
| chr1 | 25510221 | 25510370 | CSAR_peak_  | 10.83,10.95,:  | + |
| chr1 | 25510506 | 25510549 | CSAR_peak_  | 10.95          | + |
| chr1 | 25510617 | 25510705 | CSAR_peak_  | 8.39,25.91     | + |
| chr1 | 25658090 | 25658166 | CSAR_peak_  | 34.84,14.76    | + |
| chr1 | 25658495 | 25658565 | CSAR_peak_  | 12.13          | + |
| chr1 | 25658590 | 25658669 | CSAR_peak_! | 7.73,6.45,13.  | + |
| chr1 | 25658804 | 25658836 | CSAR_peak_  | 8.39           | + |
| chr1 | 25658841 | 25658900 | CSAR_peak_! | 5.67,6.78      | + |
| chr1 | 25659019 | 25659155 | CSAR_peak_  | 21.56,16.11,(! | + |
| chr1 | 25694131 | 25694185 | CSAR_peak_! | 12.74          | + |
| chr1 | 25694410 | 25694505 | CSAR_peak_  | 12.31,12.17    | + |
| chr1 | 25694602 | 25694620 | CSAR_peak_  | 8.28           | + |
| chr1 | 25694709 | 25694780 | CSAR_peak_  | 20.94,11.14    | + |
| chr1 | 25695122 | 25695222 | CSAR_peak_  | 8.39           | + |
| chr1 | 25695227 | 25695263 | CSAR_peak_  | 7.58           | + |
| chr1 | 25695457 | 25695569 | CSAR_peak_  | 29.17,22.58    | + |
| chr1 | 25695639 | 25695694 | CSAR_peak_  | 8.65           | + |
| chr1 | 25695765 | 25695809 | CSAR_peak_  | 7.27           | + |
| chr1 | 25752850 | 25753040 | CSAR_peak_  | 8.39,16.34,8.  | + |
| chr1 | 25753572 | 25753622 | CSAR_peak_  | 6.03           | + |
| chr1 | 25753803 | 25753865 | CSAR_peak_  | 14.76,9.27     | + |
| chr1 | 25753967 | 25754002 | CSAR_peak_  | 14.76          | + |
| chr1 | 25754018 | 25754041 | CSAR_peak_  | 6.21           | + |
| chr1 | 25754416 | 25754465 | CSAR_peak_  | 6.57           | + |
| chr1 | 25754624 | 25754755 | CSAR_peak_  | 22.74,17.35,:  | + |
| chr1 | 25754812 | 25754859 | CSAR_peak_  | 10.18,9.35     | + |
| chr1 | 25754901 | 25755037 | CSAR_peak_  | 6.57,10.02,6.  | + |
| chr1 | 25755151 | 25755270 | CSAR_peak_  | 8.28,12.94,9.  | + |
| chr1 | 25782333 | 25782428 | CSAR_peak_  | 12.13,12.27    | + |
| chr1 | 25782745 | 25782846 | CSAR_peak_  | 10.83,13.66,:  | + |
| chr1 | 25782872 | 25782989 | CSAR_peak_! | 15.43,6.57,1(! | + |
| chr1 | 25783028 | 25783068 | CSAR_peak_  | 7.7            | + |
| chr1 | 25783139 | 25783229 | CSAR_peak_  | 8.13,8.39,8.9  | + |
| chr1 | 25783424 | 25783501 | CSAR_peak_  | 7.27,10.95     | + |

|      |          |          |             |               |   |
|------|----------|----------|-------------|---------------|---|
| chr1 | 25784193 | 25784253 | CSAR_peak_  | 8.39          | + |
| chr1 | 25785612 | 25785666 | CSAR_peak_  | 8.39          | + |
| chr1 | 25805398 | 25805458 | CSAR_peak_  | 10.95         | + |
| chr1 | 25829450 | 25829493 | CSAR_peak_  | 8.39          | + |
| chr1 | 25880550 | 25880607 | CSAR_peak_  | 6.03          | + |
| chr1 | 25880940 | 25881023 | CSAR_peak_  | 8.39          | + |
| chr1 | 25881189 | 25881243 | CSAR_peak_  | 6.21,7.73     | + |
| chr1 | 25881287 | 25881341 | CSAR_peak_  | 10.83         | + |
| chr1 | 25881398 | 25881476 | CSAR_peak_  | 7.7,13.48     | + |
| chr1 | 25905423 | 25905436 | CSAR_peak_  | 7.27          | + |
| chr1 | 25958221 | 25958261 | CSAR_peak_! | 7.58          | + |
| chr1 | 25958347 | 25958400 | CSAR_peak_  | 8.39          | + |
| chr1 | 25959279 | 25959354 | CSAR_peak_  | 16.33,6.03    | + |
| chr1 | 25959398 | 25959460 | CSAR_peak_  | 6.8,12.74,17. | + |
| chr1 | 25959540 | 25959558 | CSAR_peak_  | 13.44         | + |
| chr1 | 25966694 | 25966739 | CSAR_peak_  | 8.39          | + |
| chr1 | 25966950 | 25967002 | CSAR_peak_  | 9.58          | + |
| chr1 | 26039754 | 26039792 | CSAR_peak_  | 6.21          | + |
| chr1 | 26040278 | 26040328 | CSAR_peak_  | 8.39          | + |
| chr1 | 26066603 | 26066622 | CSAR_peak_  | 6.78          | + |
| chr1 | 26066722 | 26066800 | CSAR_peak_  | 7.58,9.27     | + |
| chr1 | 26066973 | 26066989 | CSAR_peak_  | 6.57          | + |
| chr1 | 26142348 | 26142417 | CSAR_peak_  | 12.13         | + |
| chr1 | 26142817 | 26142939 | CSAR_peak_  | 16.33         | + |
| chr1 | 26189907 | 26189923 | CSAR_peak_  | 8.39          | + |
| chr1 | 26190297 | 26190435 | CSAR_peak_! | 7.61,13.29,1! | + |
| chr1 | 26190539 | 26190630 | CSAR_peak_! | 68.72,69.61   | + |
| chr1 | 26232391 | 26232446 | CSAR_peak_! | 16.05         | + |
| chr1 | 26233084 | 26233180 | CSAR_peak_! | 7.58          | + |
| chr1 | 26233587 | 26233647 | CSAR_peak_  | 7.27          | + |
| chr1 | 26233741 | 26233783 | CSAR_peak_  | 6.21          | + |
| chr1 | 26233870 | 26233920 | CSAR_peak_  | 7.34          | + |
| chr1 | 26234107 | 26234141 | CSAR_peak_  | 6.78          | + |
| chr1 | 26234226 | 26234240 | CSAR_peak_  | 7.2           | + |
| chr1 | 26234251 | 26234305 | CSAR_peak_! | 8.52          | + |
| chr1 | 26235319 | 26235355 | CSAR_peak_  | 14.88,10.33   | + |
| chr1 | 26235768 | 26235815 | CSAR_peak_  | 8.39          | + |
| chr1 | 26236139 | 26236190 | CSAR_peak_  | 12.13         | + |
| chr1 | 26236782 | 26236834 | CSAR_peak_! | 5.62          | + |
| chr1 | 26316960 | 26317002 | CSAR_peak_! | 6.02          | + |
| chr1 | 26317461 | 26317501 | CSAR_peak_  | 6.57          | + |
| chr1 | 26384812 | 26384851 | CSAR_peak_  | 6.95          | + |

|      |          |          |             |                |   |
|------|----------|----------|-------------|----------------|---|
| chr1 | 26387518 | 26387580 | CSAR_peak_  | 6.02,8.65      | + |
| chr1 | 26387815 | 26387868 | CSAR_peak_  | 7.27           | + |
| chr1 | 26401103 | 26401183 | CSAR_peak_  | 16.34          | + |
| chr1 | 26401405 | 26401555 | CSAR_peak_  | 10.62,9.97,7.  | + |
| chr1 | 26401664 | 26401677 | CSAR_peak_  | 8.39           | + |
| chr1 | 26401801 | 26401860 | CSAR_peak_  | 10.46          | + |
| chr1 | 26401947 | 26402032 | CSAR_peak_  | 8.18           | + |
| chr1 | 26402134 | 26402303 | CSAR_peak_  | 11.28,29.36,(  | + |
| chr1 | 26402417 | 26402514 | CSAR_peak_  | 10.95,6.44,5.  | + |
| chr1 | 26402570 | 26402619 | CSAR_peak_! | 12.5           | + |
| chr1 | 26402740 | 26402765 | CSAR_peak_  | 6.21           | + |
| chr1 | 26403463 | 26403535 | CSAR_peak_  | 7.27,17.4      | + |
| chr1 | 26403648 | 26403773 | CSAR_peak_! | 12.31,13.48,(  | + |
| chr1 | 26403892 | 26404017 | CSAR_peak_  | 11.8,6.58,6.2  | + |
| chr1 | 26404032 | 26404043 | CSAR_peak_  | 7.27           | + |
| chr1 | 26404045 | 26404584 | CSAR_peak_! | 16.11,7.13,1.  | + |
| chr1 | 26404593 | 26404654 | CSAR_peak_  | 17.51,9.72,1(+ |   |
| chr1 | 26404691 | 26404756 | CSAR_peak_  | 13.85,13.85    | + |
| chr1 | 26404992 | 26405164 | CSAR_peak_  | 17.82,7.26,1(+ |   |
| chr1 | 26405239 | 26405264 | CSAR_peak_  | 16.33          | + |
| chr1 | 26405276 | 26405319 | CSAR_peak_  | 6.72,6.12      | + |
| chr1 | 26405397 | 26405424 | CSAR_peak_  | 10.12          | + |
| chr1 | 26405448 | 26405504 | CSAR_peak_  | 20.94,13.44    | + |
| chr1 | 26405583 | 26405686 | CSAR_peak_  | 14.15,10.53,:  | + |
| chr1 | 26405691 | 26405800 | CSAR_peak_  | 10.33,17.68,(  | + |
| chr1 | 26405834 | 26405940 | CSAR_peak_  | 8.39           | + |
| chr1 | 26405969 | 26406092 | CSAR_peak_  | 14.88,7.58,1:  | + |
| chr1 | 26406174 | 26406256 | CSAR_peak_  | 10.95,12.13    | + |
| chr1 | 26406292 | 26406326 | CSAR_peak_  | 7.73           | + |
| chr1 | 26406397 | 26406443 | CSAR_peak_  | 6.21           | + |
| chr1 | 26407076 | 26407145 | CSAR_peak_  | 6.44,9.58      | + |
| chr1 | 26420635 | 26420682 | CSAR_peak_! | 6.57           | + |
| chr1 | 26420805 | 26420842 | CSAR_peak_  | 9.58,7.27      | + |
| chr1 | 26421260 | 26421304 | CSAR_peak_! | 7.92           | + |
| chr1 | 26421729 | 26421778 | CSAR_peak_  | 12.17          | + |
| chr1 | 26421838 | 26421881 | CSAR_peak_  | 11.66          | + |
| chr1 | 26426772 | 26426818 | CSAR_peak_! | 6.57           | + |
| chr1 | 26427019 | 26427062 | CSAR_peak_  | 6.85           | + |
| chr1 | 26429730 | 26429859 | CSAR_peak_  | 390.44,555.9+  |   |
| chr1 | 26454938 | 26454994 | CSAR_peak_  | 6.57,6.21      | + |
| chr1 | 26609618 | 26609677 | CSAR_peak_! | 8.65           | + |
| chr1 | 26609735 | 26609843 | CSAR_peak_  | 13,6.21        | + |

|      |          |          |             |               |   |
|------|----------|----------|-------------|---------------|---|
| chr1 | 26610222 | 26610294 | CSAR_peak_  | 8.39,12.13    | + |
| chr1 | 26611640 | 26611743 | CSAR_peak_  | 8.39,7.7,6.03 | + |
| chr1 | 26611841 | 26611848 | CSAR_peak_! | 5.62          | + |
| chr1 | 26611899 | 26611998 | CSAR_peak_! | 21.94,9.72    | + |
| chr1 | 26619214 | 26619268 | CSAR_peak_  | 9.58          | + |
| chr1 | 26619715 | 26619791 | CSAR_peak_  | 9.58,8.65     | + |
| chr1 | 26623811 | 26623857 | CSAR_peak_! | 6.57,7.27     | + |
| chr1 | 26624700 | 26624758 | CSAR_peak_! | 6.95,6.02     | + |
| chr1 | 26625482 | 26625531 | CSAR_peak_! | 8.95,7.58     | + |
| chr1 | 26625615 | 26625625 | CSAR_peak_! | 5.62          | + |
| chr1 | 26625981 | 26626031 | CSAR_peak_  | 8.39          | + |
| chr1 | 26626105 | 26626166 | CSAR_peak_  | 7.27          | + |
| chr1 | 26627196 | 26627380 | CSAR_peak_  | 9.25          | + |
| chr1 | 26627823 | 26627879 | CSAR_peak_  | 10.7          | + |
| chr1 | 26627959 | 26627994 | CSAR_peak_  | 6.21          | + |
| chr1 | 26628263 | 26628316 | CSAR_peak_  | 7.58,6.95     | + |
| chr1 | 26628427 | 26628454 | CSAR_peak_  | 8.09          | + |
| chr1 | 26628679 | 26628747 | CSAR_peak_! | 5.62,7.73,9.2 | + |
| chr1 | 26629161 | 26629220 | CSAR_peak_  | 7.27,6.95     | + |
| chr1 | 26629497 | 26629593 | CSAR_peak_  | 9.58,7.27     | + |
| chr1 | 26629614 | 26629695 | CSAR_peak_! | 6.44,13.51    | + |
| chr1 | 26629815 | 26629836 | CSAR_peak_  | 8.39          | + |
| chr1 | 26629849 | 26629895 | CSAR_peak_! | 6.57          | + |
| chr1 | 26630247 | 26630310 | CSAR_peak_  | 21.35         | + |
| chr1 | 26630691 | 26630732 | CSAR_peak_  | 8.65          | + |
| chr1 | 26630845 | 26630868 | CSAR_peak_  | 6.21          | + |
| chr1 | 26636485 | 26636540 | CSAR_peak_  | 7.27          | + |
| chr1 | 26636547 | 26636572 | CSAR_peak_  | 6.21          | + |
| chr1 | 26640749 | 26640783 | CSAR_peak_  | 9.58          | + |
| chr1 | 26640959 | 26640989 | CSAR_peak_  | 6.21          | + |
| chr1 | 26641717 | 26641766 | CSAR_peak_  | 7.27,7.92     | + |
| chr1 | 26641891 | 26641915 | CSAR_peak_  | 8.39          | + |
| chr1 | 26654790 | 26654842 | CSAR_peak_  | 12.31         | + |
| chr1 | 26654871 | 26655103 | CSAR_peak_  | 16.19,17.89,  | + |
| chr1 | 26655178 | 26655327 | CSAR_peak_! | 24.35,6.85,8. | + |
| chr1 | 26655350 | 26655487 | CSAR_peak_  | 14,18.35      | + |
| chr1 | 26655514 | 26655584 | CSAR_peak_  | 20.12         | + |
| chr1 | 26655592 | 26655678 | CSAR_peak_  | 26.34,11.66   | + |
| chr1 | 26655681 | 26655705 | CSAR_peak_  | 6.21          | + |
| chr1 | 26655726 | 26655831 | CSAR_peak_  | 19.36,12.31,! | + |
| chr1 | 26655931 | 26656110 | CSAR_peak_  | 6.44,31.73,8. | + |
| chr1 | 26656125 | 26656254 | CSAR_peak_  | 16.77,37.01,; | + |

|      |          |          |             |                |   |
|------|----------|----------|-------------|----------------|---|
| chr1 | 26656332 | 26656496 | CSAR_peak_  | 16.54,11.96    | + |
| chr1 | 26656510 | 26656772 | CSAR_peak_! | 9.77,7.27,7.7  | + |
| chr1 | 26656885 | 26657031 | CSAR_peak_  | 9.61,14.76     | + |
| chr1 | 26657133 | 26657187 | CSAR_peak_  | 6.21,7.27      | + |
| chr1 | 26657237 | 26657296 | CSAR_peak_  | 12.13          | + |
| chr1 | 26657538 | 26657605 | CSAR_peak_  | 7.27           | + |
| chr1 | 26701959 | 26702001 | CSAR_peak_! | 6.03           | + |
| chr1 | 26703090 | 26703273 | CSAR_peak_! | 6.95,10.83,9.  | + |
| chr1 | 26703348 | 26703412 | CSAR_peak_  | 17.82,13.44    | + |
| chr1 | 26703429 | 26703568 | CSAR_peak_  | 13,10.83       | + |
| chr1 | 26703572 | 26703647 | CSAR_peak_  | 9.77,10.02     | + |
| chr1 | 26703936 | 26703988 | CSAR_peak_  | 6.57,9.58      | + |
| chr1 | 26704234 | 26704268 | CSAR_peak_! | 5.62           | + |
| chr1 | 26704574 | 26704622 | CSAR_peak_  | 9.58           | + |
| chr1 | 26704631 | 26704701 | CSAR_peak_  | 6.87,12.17     | + |
| chr1 | 26705776 | 26705824 | CSAR_peak_  | 13.29,6.03     | + |
| chr1 | 26705897 | 26705947 | CSAR_peak_! | 12.98,10.17    | + |
| chr1 | 26706145 | 26706211 | CSAR_peak_! | 8.95,7.27,10.  | + |
| chr1 | 26706291 | 26706390 | CSAR_peak_  | 9.58,6.03      | + |
| chr1 | 26706452 | 26706459 | CSAR_peak_  | 6.21           | + |
| chr1 | 26706805 | 26706863 | CSAR_peak_  | 12.13,13.66,   | + |
| chr1 | 26706932 | 26707084 | CSAR_peak_  | 6.57,18.95,6.  | + |
| chr1 | 26707102 | 26707157 | CSAR_peak_! | 17.4,19.21     | + |
| chr1 | 26707212 | 26707275 | CSAR_peak_! | 17.51          | + |
| chr1 | 26707295 | 26707345 | CSAR_peak_! | 6.44           | + |
| chr1 | 26707892 | 26707967 | CSAR_peak_  | 8.39,14.76,10. | + |
| chr1 | 26708169 | 26708226 | CSAR_peak_  | 6.21           | + |
| chr1 | 26745491 | 26745528 | CSAR_peak_  | 6.21           | + |
| chr1 | 26763504 | 26763591 | CSAR_peak_  | 7.27           | + |
| chr1 | 26764233 | 26764295 | CSAR_peak_  | 6.21           | + |
| chr1 | 26782566 | 26782609 | CSAR_peak_  | 6.21           | + |
| chr1 | 26783208 | 26783258 | CSAR_peak_  | 14.76,7.29     | + |
| chr1 | 26783414 | 26783452 | CSAR_peak_  | 12.13          | + |
| chr1 | 26783955 | 26783996 | CSAR_peak_! | 10.02          | + |
| chr1 | 26784039 | 26784137 | CSAR_peak_  | 22.58          | + |
| chr1 | 26784753 | 26784815 | CSAR_peak_! | 10.02,8.39     | + |
| chr1 | 26786290 | 26786338 | CSAR_peak_  | 7.27           | + |
| chr1 | 26786430 | 26786514 | CSAR_peak_  | 6.02           | + |
| chr1 | 26788263 | 26788330 | CSAR_peak_  | 6.52           | + |
| chr1 | 26788339 | 26788367 | CSAR_peak_! | 6.95           | + |
| chr1 | 26842825 | 26842874 | CSAR_peak_  | 7.27           | + |
| chr1 | 26843807 | 26843852 | CSAR_peak_! | 6.95,8.39      | + |

|      |          |          |            |               |   |
|------|----------|----------|------------|---------------|---|
| chr1 | 26844585 | 26844596 | CSAR_peak_ | 6.57          | + |
| chr1 | 26855490 | 26855529 | CSAR_peak_ | 7.27          | + |
| chr1 | 26857111 | 26857161 | CSAR_peak_ | 6.57          | + |
| chr1 | 26857228 | 26857282 | CSAR_peak_ | 6.95          | + |
| chr1 | 26865472 | 26865549 | CSAR_peak_ | 9.58          | + |
| chr1 | 26891573 | 26891686 | CSAR_peak_ | 26.44,24.78,  | + |
| chr1 | 26937018 | 26937063 | CSAR_peak_ | 12.13,8.39    | + |
| chr1 | 26964507 | 26964573 | CSAR_peak_ | 10.83         | + |
| chr1 | 26965591 | 26965649 | CSAR_peak_ | 6.44          | + |
| chr1 | 26965702 | 26965759 | CSAR_peak_ | 8.95,8.39     | + |
| chr1 | 26968075 | 26968098 | CSAR_peak_ | 6.57          | + |
| chr1 | 26968224 | 26968242 | CSAR_peak_ | 6.57          | + |
| chr1 | 26968497 | 26968588 | CSAR_peak_ | 7.27          | + |
| chr1 | 26973082 | 26973159 | CSAR_peak_ | 9.03          | + |
| chr1 | 26984223 | 26984319 | CSAR_peak_ | 17.82,10.83   | + |
| chr1 | 26984386 | 26984481 | CSAR_peak_ | 8.28,7.58     | + |
| chr1 | 26984844 | 26984893 | CSAR_peak_ | 8.39          | + |
| chr1 | 26985040 | 26985108 | CSAR_peak_ | 8.09,8.28     | + |
| chr1 | 26985577 | 26985623 | CSAR_peak_ | 6.21          | + |
| chr1 | 26985726 | 26985766 | CSAR_peak_ | 8.39          | + |
| chr1 | 26999930 | 26999988 | CSAR_peak_ | 6.21          | + |
| chr1 | 27000029 | 27000105 | CSAR_peak_ | 8.39,8.39     | + |
| chr1 | 27010025 | 27010056 | CSAR_peak_ | 5.62          | + |
| chr1 | 27011115 | 27011172 | CSAR_peak_ | 11.14         | + |
| chr1 | 27012385 | 27012463 | CSAR_peak_ | 10.95,7.27,9. | + |
| chr1 | 27012696 | 27012795 | CSAR_peak_ | 8.39,8.39,6.0 | + |
| chr1 | 27013515 | 27013546 | CSAR_peak_ | 7.27          | + |
| chr1 | 27014261 | 27014295 | CSAR_peak_ | 8.39          | + |
| chr1 | 27014636 | 27014656 | CSAR_peak_ | 7.27          | + |
| chr1 | 27016290 | 27016332 | CSAR_peak_ | 7.27          | + |
| chr1 | 27016395 | 27016426 | CSAR_peak_ | 6.52          | + |
| chr1 | 27016626 | 27016743 | CSAR_peak_ | 9.77,7.73     | + |
| chr1 | 27028637 | 27028678 | CSAR_peak_ | 5.62          | + |
| chr1 | 27055341 | 27055428 | CSAR_peak_ | 6.57,14.88    | + |
| chr1 | 27098667 | 27098726 | CSAR_peak_ | 11.38,13.48   | + |
| chr1 | 27098786 | 27098813 | CSAR_peak_ | 10.02,6.57    | + |
| chr1 | 27099347 | 27099391 | CSAR_peak_ | 8.39          | + |
| chr1 | 27115064 | 27115114 | CSAR_peak_ | 6.21          | + |
| chr1 | 27138143 | 27138202 | CSAR_peak_ | 8.39          | + |
| chr1 | 27148555 | 27148615 | CSAR_peak_ | 13.48,7.26    | + |
| chr1 | 27148663 | 27148909 | CSAR_peak_ | 16.11,8.5,8.6 | + |
| chr1 | 27148917 | 27149028 | CSAR_peak_ | 16.77,18.73   | + |

|      |          |          |            |               |   |
|------|----------|----------|------------|---------------|---|
| chr1 | 27149071 | 27149299 | CSAR_peak_ | 18.49,14.52,: | + |
| chr1 | 27149493 | 27149544 | CSAR_peak_ | 6.57          | + |
| chr1 | 27149583 | 27149776 | CSAR_peak_ | 10.02,11.96,: | + |
| chr1 | 27150024 | 27150059 | CSAR_peak_ | 7.27          | + |
| chr1 | 27150065 | 27150093 | CSAR_peak_ | 6.21          | + |
| chr1 | 27150181 | 27150245 | CSAR_peak_ | 8.95          | + |
| chr1 | 27150252 | 27150314 | CSAR_peak_ | 10.31,6.85,6. | + |
| chr1 | 27150342 | 27150461 | CSAR_peak_ | 11.96,14.76,: | + |
| chr1 | 27150476 | 27150554 | CSAR_peak_ | 8.19,8.92     | + |
| chr1 | 27150796 | 27150846 | CSAR_peak_ | 5.62          | + |
| chr1 | 27151268 | 27151312 | CSAR_peak_ | 9.77          | + |
| chr1 | 27165992 | 27166080 | CSAR_peak_ | 8.39,7.27     | + |
| chr1 | 27166088 | 27166177 | CSAR_peak_ | 9.79,11.14,6. | + |
| chr1 | 27166209 | 27166325 | CSAR_peak_ | 7.58,12.13    | + |
| chr1 | 27166354 | 27166437 | CSAR_peak_ | 9.58          | + |
| chr1 | 27166632 | 27166749 | CSAR_peak_ | 11.38,8.65,1: | + |
| chr1 | 27167043 | 27167091 | CSAR_peak_ | 8.39          | + |
| chr1 | 27167747 | 27167854 | CSAR_peak_ | 16.11,8.39    | + |
| chr1 | 27168262 | 27168323 | CSAR_peak_ | 8.39          | + |
| chr1 | 27242188 | 27242242 | CSAR_peak_ | 11.28         | + |
| chr1 | 27242384 | 27242473 | CSAR_peak_ | 6.2           | + |
| chr1 | 27248431 | 27248466 | CSAR_peak_ | 6.21          | + |
| chr1 | 27304106 | 27304194 | CSAR_peak_ | 5.62,6.11     | + |
| chr1 | 27304617 | 27304660 | CSAR_peak_ | 16.33         | + |
| chr1 | 27308827 | 27308898 | CSAR_peak_ | 7.58          | + |
| chr1 | 27308960 | 27309020 | CSAR_peak_ | 6.44          | + |
| chr1 | 27348660 | 27348752 | CSAR_peak_ | 94.4,149.57   | + |
| chr1 | 27348755 | 27348799 | CSAR_peak_ | 144.79,50.99  | + |
| chr1 | 27350334 | 27350379 | CSAR_peak_ | 10.83         | + |
| chr1 | 27350664 | 27350741 | CSAR_peak_ | 7.58,7.89     | + |
| chr1 | 27351715 | 27351824 | CSAR_peak_ | 11.14         | + |
| chr1 | 27351964 | 27352127 | CSAR_peak_ | 9.58,9.61     | + |
| chr1 | 27352861 | 27352901 | CSAR_peak_ | 9.58          | + |
| chr1 | 27353116 | 27353146 | CSAR_peak_ | 8.39          | + |
| chr1 | 27353222 | 27353240 | CSAR_peak_ | 8.39          | + |
| chr1 | 27354669 | 27354726 | CSAR_peak_ | 6.21          | + |
| chr1 | 27366816 | 27366896 | CSAR_peak_ | 12.13         | + |
| chr1 | 27367305 | 27367355 | CSAR_peak_ | 8.39          | + |
| chr1 | 27367449 | 27367513 | CSAR_peak_ | 8.12,8.39     | + |
| chr1 | 27368683 | 27368718 | CSAR_peak_ | 9.58          | + |
| chr1 | 27368869 | 27368915 | CSAR_peak_ | 6.44,6.21     | + |
| chr1 | 27369003 | 27369072 | CSAR_peak_ | 10.94,6.45    | + |



|      |          |          |            |               |   |
|------|----------|----------|------------|---------------|---|
| chr1 | 27369233 | 27369280 | CSAR_peak_ | 8.95,14.88    | + |
| chr1 | 27369364 | 27369372 | CSAR_peak_ | 6.57          | + |
| chr1 | 27369407 | 27369459 | CSAR_peak_ | 17.35         | + |
| chr1 | 27369555 | 27369635 | CSAR_peak_ | 20.43,6.57    | + |
| chr1 | 27369753 | 27369872 | CSAR_peak_ | 9.03          | + |
| chr1 | 27369921 | 27369957 | CSAR_peak_ | 6.21          | + |
| chr1 | 27370651 | 27370711 | CSAR_peak_ | 10.95,10.83   | + |
| chr1 | 27372446 | 27372538 | CSAR_peak_ | 10.66         | + |
| chr1 | 27372568 | 27372629 | CSAR_peak_ | 11.39,6.54,2! | + |
| chr1 | 27372710 | 27372757 | CSAR_peak_ | 6.31,18.85,1! | + |
| chr1 | 27373350 | 27373400 | CSAR_peak_ | 8.39          | + |
| chr1 | 27373526 | 27373670 | CSAR_peak_ | 7.58,16.19,1! | + |
| chr1 | 27373793 | 27374087 | CSAR_peak_ | 16.33,10.02,! | + |
| chr1 | 27374160 | 27374214 | CSAR_peak_ | 8.9,17.57     | + |
| chr1 | 27374545 | 27374651 | CSAR_peak_ | 12.17,18.61,! | + |
| chr1 | 27374662 | 27374773 | CSAR_peak_ | 13.48,7.58,1! | + |
| chr1 | 27374859 | 27374944 | CSAR_peak_ | 10.52,7.36    | + |
| chr1 | 27375020 | 27375156 | CSAR_peak_ | 10.95,11.66,! | + |
| chr1 | 27375183 | 27375242 | CSAR_peak_ | 8.95,5.62     | + |
| chr1 | 27375255 | 27375270 | CSAR_peak_ | 6.03          | + |
| chr1 | 27375411 | 27375475 | CSAR_peak_ | 9.58,7.27     | + |
| chr1 | 27375564 | 27375722 | CSAR_peak_ | 14.76,7.34    | + |
| chr1 | 27375903 | 27375925 | CSAR_peak_ | 7.27,13.48    | + |
| chr1 | 27375928 | 27376036 | CSAR_peak_ | 9.58,7.27     | + |
| chr1 | 27376047 | 27376196 | CSAR_peak_ | 6.57,6.1      | + |
| chr1 | 27376198 | 27376244 | CSAR_peak_ | 9.58          | + |
| chr1 | 27376447 | 27376506 | CSAR_peak_ | 6.21          | + |
| chr1 | 27383902 | 27383936 | CSAR_peak_ | 6.21          | + |
| chr1 | 27384072 | 27384127 | CSAR_peak_ | 6.57          | + |
| chr1 | 27386445 | 27386489 | CSAR_peak_ | 6.21          | + |
| chr1 | 27390649 | 27390726 | CSAR_peak_ | 14.88         | + |
| chr1 | 27391136 | 27391190 | CSAR_peak_ | 7.27          | + |
| chr1 | 27474834 | 27474859 | CSAR_peak_ | 6.21          | + |
| chr1 | 27481055 | 27481112 | CSAR_peak_ | 8.95          | + |
| chr1 | 27481161 | 27481256 | CSAR_peak_ | 6.57,17.57    | + |
| chr1 | 27482774 | 27482909 | CSAR_peak_ | 10.83         | + |
| chr1 | 27487104 | 27487165 | CSAR_peak_ | 6.57          | + |
| chr1 | 27487638 | 27487680 | CSAR_peak_ | 5.62          | + |
| chr1 | 27487745 | 27487873 | CSAR_peak_ | 14.88         | + |
| chr1 | 27487978 | 27487998 | CSAR_peak_ | 8.39          | + |
| chr1 | 27488528 | 27488609 | CSAR_peak_ | 17.82         | + |
| chr1 | 27490507 | 27490537 | CSAR_peak_ | 6.95          | + |

|      |          |          |            |               |   |
|------|----------|----------|------------|---------------|---|
| chr1 | 27492311 | 27492360 | CSAR_peak_ | 6.21          | + |
| chr1 | 27492395 | 27492428 | CSAR_peak_ | 6.21          | + |
| chr1 | 27492783 | 27492833 | CSAR_peak_ | 8.39          | + |
| chr1 | 27604879 | 27604941 | CSAR_peak_ | 12.17,9.27    | + |
| chr1 | 27605088 | 27605137 | CSAR_peak_ | 6.21          | + |
| chr1 | 27608358 | 27608388 | CSAR_peak_ | 6.57,6.21     | + |
| chr1 | 27627374 | 27627471 | CSAR_peak_ | 8.39,8.39     | + |
| chr1 | 27629579 | 27629595 | CSAR_peak_ | 6.87          | + |
| chr1 | 27629706 | 27629720 | CSAR_peak_ | 10.33         | + |
| chr1 | 27629726 | 27629835 | CSAR_peak_ | 29.41,15.61,  | + |
| chr1 | 27629877 | 27630225 | CSAR_peak_ | 17.82,18.65,  | + |
| chr1 | 27630272 | 27630341 | CSAR_peak_ | 12.13,14.85   | + |
| chr1 | 27630348 | 27630515 | CSAR_peak_ | 25.08,10.25   | + |
| chr1 | 27630621 | 27630670 | CSAR_peak_ | 8.39          | + |
| chr1 | 27630714 | 27630969 | CSAR_peak_ | 22.52,14.76,  | + |
| chr1 | 27631124 | 27631239 | CSAR_peak_ | 22.58,8.95    | + |
| chr1 | 27631241 | 27631287 | CSAR_peak_ | 7.34          | + |
| chr1 | 27631382 | 27631489 | CSAR_peak_ | 16.54         | + |
| chr1 | 27631498 | 27631573 | CSAR_peak_ | 10.7,23,11.3, | + |
| chr1 | 27631579 | 27632146 | CSAR_peak_ | 19.98,11.14,  | + |
| chr1 | 27632237 | 27632427 | CSAR_peak_ | 11.28,7.13,7. | + |
| chr1 | 27632540 | 27632618 | CSAR_peak_ | 12.27         | + |
| chr1 | 27632690 | 27632742 | CSAR_peak_ | 8.39          | + |
| chr1 | 27700109 | 27700172 | CSAR_peak_ | 6.21,7.27     | + |
| chr1 | 27738237 | 27738275 | CSAR_peak_ | 6.95          | + |
| chr1 | 27769482 | 27769524 | CSAR_peak_ | 6.21          | + |
| chr1 | 27787280 | 27787344 | CSAR_peak_ | 6.21,6.57,8.6 | + |
| chr1 | 27787404 | 27787439 | CSAR_peak_ | 16.33,12.17   | + |
| chr1 | 27787934 | 27787987 | CSAR_peak_ | 7.27,9.58     | + |
| chr1 | 27788161 | 27788205 | CSAR_peak_ | 10.83         | + |
| chr1 | 27788292 | 27788373 | CSAR_peak_ | 13.51,5.62    | + |
| chr1 | 27788564 | 27788641 | CSAR_peak_ | 10.83         | + |
| chr1 | 27791179 | 27791230 | CSAR_peak_ | 8.28,8.39     | + |
| chr1 | 27792354 | 27792379 | CSAR_peak_ | 6.21          | + |
| chr1 | 27792754 | 27792816 | CSAR_peak_ | 6.21,6.95,7.5 | + |
| chr1 | 27792915 | 27792931 | CSAR_peak_ | 7.58          | + |
| chr1 | 27792944 | 27792972 | CSAR_peak_ | 6.95          | + |
| chr1 | 27793597 | 27793610 | CSAR_peak_ | 6.21          | + |
| chr1 | 27793752 | 27793890 | CSAR_peak_ | 8.39          | + |
| chr1 | 27794107 | 27794151 | CSAR_peak_ | 6.21          | + |
| chr1 | 27824736 | 27824782 | CSAR_peak_ | 6.57          | + |
| chr1 | 27825879 | 27825964 | CSAR_peak_ | 7.27,6.21     | + |

|      |          |          |            |               |   |
|------|----------|----------|------------|---------------|---|
| chr1 | 27890041 | 27890078 | CSAR_peak_ | 6.03          | + |
| chr1 | 27959790 | 27959917 | CSAR_peak_ | 9.58,11.14    | + |
| chr1 | 27960656 | 27960772 | CSAR_peak_ | 7.92,5.71,6.5 | + |
| chr1 | 27960894 | 27960967 | CSAR_peak_ | 16.11         | + |
| chr1 | 27960980 | 27961017 | CSAR_peak_ | 8.39          | + |
| chr1 | 27961022 | 27961057 | CSAR_peak_ | 12.31         | + |
| chr1 | 27961102 | 27961288 | CSAR_peak_ | 14.76,6.21    | + |
| chr1 | 27961485 | 27961599 | CSAR_peak_ | 6.57,14.85,9. | + |
| chr1 | 27961683 | 27961738 | CSAR_peak_ | 7.92          | + |
| chr1 | 27961765 | 27961857 | CSAR_peak_ | 6.21          | + |
| chr1 | 27963538 | 27963652 | CSAR_peak_ | 16.33,6.03    | + |
| chr1 | 27964481 | 27964638 | CSAR_peak_ | 6.02,9.77,6.2 | + |
| chr1 | 27964978 | 27965025 | CSAR_peak_ | 7.27          | + |
| chr1 | 27965035 | 27965094 | CSAR_peak_ | 7.27          | + |
| chr1 | 27965102 | 27965198 | CSAR_peak_ | 7.29,5.62     | + |
| chr1 | 27975292 | 27975356 | CSAR_peak_ | 14.59         | + |
| chr1 | 27975373 | 27975400 | CSAR_peak_ | 7.91          | + |
| chr1 | 27975405 | 27975479 | CSAR_peak_ | 10.33,9.79    | + |
| chr1 | 27975492 | 27975542 | CSAR_peak_ | 13.44,8.95    | + |
| chr1 | 27976561 | 27976688 | CSAR_peak_ | 12.17,7.68    | + |
| chr1 | 27976858 | 27976980 | CSAR_peak_ | 7.92          | + |
| chr1 | 27983080 | 27983349 | CSAR_peak_ | 26.69,9.31,6. | + |
| chr1 | 27983641 | 27983873 | CSAR_peak_ | 16.11,9.58,2. | + |
| chr1 | 27983966 | 27984094 | CSAR_peak_ | 13.66,11.66,! | + |
| chr1 | 27987249 | 27987314 | CSAR_peak_ | 10.95,10.7,6. | + |
| chr1 | 27991574 | 27991633 | CSAR_peak_ | 9.58          | + |
| chr1 | 27991759 | 27991827 | CSAR_peak_ | 6.02          | + |
| chr1 | 27991986 | 27992092 | CSAR_peak_ | 6.57,11.38    | + |
| chr1 | 27992226 | 27992262 | CSAR_peak_ | 6.21          | + |
| chr1 | 27992317 | 27992407 | CSAR_peak_ | 6.95,6.57     | + |
| chr1 | 27992674 | 27992717 | CSAR_peak_ | 8.65          | + |
| chr1 | 28053442 | 28053474 | CSAR_peak_ | 7.92,6.45     | + |
| chr1 | 28053590 | 28053632 | CSAR_peak_ | 7.06,6.64     | + |
| chr1 | 28053699 | 28053769 | CSAR_peak_ | 9.31,13.29    | + |
| chr1 | 28100739 | 28100778 | CSAR_peak_ | 6.21          | + |
| chr1 | 28144141 | 28144237 | CSAR_peak_ | 9.35,48.39    | + |
| chr1 | 28144238 | 28144319 | CSAR_peak_ | 10.62,8.65    | + |
| chr1 | 28144353 | 28144416 | CSAR_peak_ | 7.94,16.33    | + |
| chr1 | 28144490 | 28144603 | CSAR_peak_ | 9.58          | + |
| chr1 | 28146906 | 28146935 | CSAR_peak_ | 6.57          | + |
| chr1 | 28212248 | 28212361 | CSAR_peak_ | 387.35,282.9  | + |
| chr1 | 28212393 | 28212476 | CSAR_peak_ | 66.17,44.85   | + |

|      |          |          |                           |
|------|----------|----------|---------------------------|
| chr1 | 28212513 | 28212608 | CSAR_peak_(115.23,36.43+  |
| chr1 | 28212626 | 28212717 | CSAR_peak_(7.36,6.01,9.4+ |
| chr1 | 28219710 | 28219820 | CSAR_peak_(37.42,33.47 +  |
| chr1 | 28225405 | 28225428 | CSAR_peak_(7.27 +         |
| chr1 | 28228171 | 28228227 | CSAR_peak_(7.58 +         |
| chr1 | 28235363 | 28235395 | CSAR_peak_(6.21 +         |
| chr1 | 28235504 | 28235566 | CSAR_peak_(6.02 +         |
| chr1 | 28235581 | 28235622 | CSAR_peak_(8.39 +         |
| chr1 | 28235675 | 28235719 | CSAR_peak_(9.58 +         |
| chr1 | 28235903 | 28235937 | CSAR_peak_(8.65 +         |
| chr1 | 28236424 | 28236466 | CSAR_peak_(6.21 +         |
| chr1 | 28236778 | 28236858 | CSAR_peak_(13.48,9.58 +   |
| chr1 | 28237114 | 28237186 | CSAR_peak_(6.21,8.39 +    |
| chr1 | 28262512 | 28262566 | CSAR_peak_(12.17 +        |
| chr1 | 28263383 | 28263429 | CSAR_peak_(7.58 +         |
| chr1 | 28263641 | 28263777 | CSAR_peak_(8.5,7.34,23.8+ |
| chr1 | 28264147 | 28264197 | CSAR_peak_(6.21 +         |
| chr1 | 28264242 | 28264391 | CSAR_peak_(6.1,10.62,8.9+ |
| chr1 | 28264429 | 28264623 | CSAR_peak_(6.57,7.27,5.6+ |
| chr1 | 28264735 | 28264764 | CSAR_peak_(6.21 +         |
| chr1 | 28264931 | 28264994 | CSAR_peak_(7.34,16.33 +   |
| chr1 | 28265282 | 28265375 | CSAR_peak_(13.48,9.58 +   |
| chr1 | 28266101 | 28266112 | CSAR_peak_(6.21 +         |
| chr1 | 28313933 | 28313976 | CSAR_peak_(8.39 +         |
| chr1 | 28314865 | 28314908 | CSAR_peak_(6.22 +         |
| chr1 | 28315246 | 28315302 | CSAR_peak_(8.39 +         |
| chr1 | 28315674 | 28315708 | CSAR_peak_(6.03 +         |
| chr1 | 28328471 | 28328516 | CSAR_peak_(7.27 +         |
| chr1 | 28366060 | 28366100 | CSAR_peak_(9.58 +         |
| chr1 | 28366675 | 28366701 | CSAR_peak_(6.21 +         |
| chr1 | 28366716 | 28366738 | CSAR_peak_(6.02 +         |
| chr1 | 28367078 | 28367112 | CSAR_peak_(9.27 +         |
| chr1 | 28367259 | 28367308 | CSAR_peak_(6.21,6.57 +    |
| chr1 | 28410022 | 28410051 | CSAR_peak_(7.27 +         |
| chr1 | 28411526 | 28411572 | CSAR_peak_(6.03 +         |
| chr1 | 28458969 | 28459057 | CSAR_peak_(5.62,8.39 +    |
| chr1 | 28459202 | 28459282 | CSAR_peak_(17.52,8.39 +   |
| chr1 | 28459383 | 28459447 | CSAR_peak_(10.83 +        |
| chr1 | 28460130 | 28460194 | CSAR_peak_(10.02,6.57 +   |
| chr1 | 28460260 | 28460439 | CSAR_peak_(19.36,7.73 +   |
| chr1 | 28462060 | 28462087 | CSAR_peak_(6.21 +         |
| chr1 | 28476471 | 28476519 | CSAR_peak_(14.76 +        |

|      |          |          |            |               |   |
|------|----------|----------|------------|---------------|---|
| chr1 | 28516742 | 28516785 | CSAR_peak_ | 7.27          | + |
| chr1 | 28516858 | 28516942 | CSAR_peak_ | 6.57,8.28     | + |
| chr1 | 28516981 | 28517017 | CSAR_peak_ | 6.21          | + |
| chr1 | 28534161 | 28534186 | CSAR_peak_ | 5.62          | + |
| chr1 | 28539551 | 28539605 | CSAR_peak_ | 8.39,11.14    | + |
| chr1 | 28539784 | 28539844 | CSAR_peak_ | 8.39          | + |
| chr1 | 28539965 | 28540039 | CSAR_peak_ | 12.13         | + |
| chr1 | 28572180 | 28572218 | CSAR_peak_ | 6.57          | + |
| chr1 | 28663218 | 28663305 | CSAR_peak_ | 6.21,6.03     | + |
| chr1 | 28669067 | 28669133 | CSAR_peak_ | 6.21          | + |
| chr1 | 28685119 | 28685171 | CSAR_peak_ | 9.58          | + |
| chr1 | 28685609 | 28685650 | CSAR_peak_ | 7.27          | + |
| chr1 | 28697102 | 28697188 | CSAR_peak_ | 8.39,7.92,7.5 | + |
| chr1 | 28698034 | 28698066 | CSAR_peak_ | 8.19          | + |
| chr1 | 28698171 | 28698212 | CSAR_peak_ | 9.58          | + |
| chr1 | 28698477 | 28698521 | CSAR_peak_ | 7.27          | + |
| chr1 | 28715872 | 28715908 | CSAR_peak_ | 14.76         | + |
| chr1 | 28715998 | 28716004 | CSAR_peak_ | 8.95          | + |
| chr1 | 28716226 | 28716282 | CSAR_peak_ | 7.27          | + |
| chr1 | 28716653 | 28716694 | CSAR_peak_ | 6.57          | + |
| chr1 | 28716829 | 28716885 | CSAR_peak_ | 6.21          | + |
| chr1 | 28728516 | 28728578 | CSAR_peak_ | 6.85          | + |
| chr1 | 28730138 | 28730174 | CSAR_peak_ | 6.21          | + |
| chr1 | 28735199 | 28735232 | CSAR_peak_ | 7.92          | + |
| chr1 | 28735253 | 28735290 | CSAR_peak_ | 7.27          | + |
| chr1 | 28736799 | 28736846 | CSAR_peak_ | 16.33         | + |
| chr1 | 28736954 | 28737004 | CSAR_peak_ | 7.27          | + |
| chr1 | 28737009 | 28737080 | CSAR_peak_ | 8.65,6.45,16. | + |
| chr1 | 28737464 | 28737513 | CSAR_peak_ | 6.21          | + |
| chr1 | 28738505 | 28738600 | CSAR_peak_ | 10.02,12.13   | + |
| chr1 | 28740833 | 28740878 | CSAR_peak_ | 10.31,19.36   | + |
| chr1 | 28740958 | 28740998 | CSAR_peak_ | 8.95          | + |
| chr1 | 28741219 | 28741300 | CSAR_peak_ | 6.03,9.03,6.0 | + |
| chr1 | 28741345 | 28741450 | CSAR_peak_ | 8.65,9.27     | + |
| chr1 | 28741519 | 28741569 | CSAR_peak_ | 9.77          | + |
| chr1 | 28741643 | 28741737 | CSAR_peak_ | 7.06,6.21,9.7 | + |
| chr1 | 28741904 | 28741963 | CSAR_peak_ | 8.39          | + |
| chr1 | 28747041 | 28747104 | CSAR_peak_ | 7.92          | + |
| chr1 | 28777667 | 28777727 | CSAR_peak_ | 11.38,8.95    | + |
| chr1 | 28777819 | 28777865 | CSAR_peak_ | 7.27,6.02     | + |
| chr1 | 28779131 | 28779178 | CSAR_peak_ | 9.77          | + |
| chr1 | 28848317 | 28848439 | CSAR_peak_ | 10.31,16.08   | + |

|      |          |          |            |               |   |
|------|----------|----------|------------|---------------|---|
| chr1 | 28848724 | 28848816 | CSAR_peak_ | 6.64          | + |
| chr1 | 28848989 | 28849043 | CSAR_peak_ | 8.39          | + |
| chr1 | 28849537 | 28849589 | CSAR_peak_ | 9.77          | + |
| chr1 | 28850351 | 28850404 | CSAR_peak_ | 8.65          | + |
| chr1 | 28867417 | 28867503 | CSAR_peak_ | 7.73          | + |
| chr1 | 28881893 | 28882001 | CSAR_peak_ | 10.95,7.7,6.8 | + |
| chr1 | 28882718 | 28882753 | CSAR_peak_ | 13.48         | + |
| chr1 | 28882792 | 28882830 | CSAR_peak_ | 6.95          | + |
| chr1 | 28882922 | 28882973 | CSAR_peak_ | 8.52          | + |
| chr1 | 28883047 | 28883101 | CSAR_peak_ | 9.58          | + |
| chr1 | 28883182 | 28883234 | CSAR_peak_ | 14.88         | + |
| chr1 | 28883752 | 28883803 | CSAR_peak_ | 6.21          | + |
| chr1 | 28884278 | 28884314 | CSAR_peak_ | 6.21          | + |
| chr1 | 28889322 | 28889428 | CSAR_peak_ | 12.01,48.01,  | + |
| chr1 | 28889476 | 28889588 | CSAR_peak_ | 65.96,55.71   | + |
| chr1 | 28889631 | 28889685 | CSAR_peak_ | 24.16,7.31    | + |
| chr1 | 28889844 | 28889888 | CSAR_peak_ | 16,11.66      | + |
| chr1 | 28889975 | 28890068 | CSAR_peak_ | 69.1,46.2,7.3 | + |
| chr1 | 28890181 | 28890258 | CSAR_peak_ | 18.04,27.93,  | + |
| chr1 | 28933401 | 28933458 | CSAR_peak_ | 7.27,10.83    | + |
| chr1 | 28933641 | 28933688 | CSAR_peak_ | 7.73          | + |
| chr1 | 28933880 | 28933934 | CSAR_peak_ | 8.39          | + |
| chr1 | 28934712 | 28934758 | CSAR_peak_ | 8.13,12.17    | + |
| chr1 | 28934946 | 28935002 | CSAR_peak_ | 13.51         | + |
| chr1 | 28935200 | 28935246 | CSAR_peak_ | 9.77          | + |
| chr1 | 28955804 | 28955860 | CSAR_peak_ | 5.62          | + |
| chr1 | 28958341 | 28958392 | CSAR_peak_ | 6.02,8.95     | + |
| chr1 | 28958797 | 28958845 | CSAR_peak_ | 27.11         | + |
| chr1 | 28958953 | 28958979 | CSAR_peak_ | 16.08         | + |
| chr1 | 28959977 | 28960026 | CSAR_peak_ | 11.14         | + |
| chr1 | 28975698 | 28975741 | CSAR_peak_ | 9.32          | + |
| chr1 | 28976992 | 28977025 | CSAR_peak_ | 6.21          | + |
| chr1 | 28986006 | 28986058 | CSAR_peak_ | 6.21          | + |
| chr1 | 29013867 | 29013900 | CSAR_peak_ | 8.39          | + |
| chr1 | 29014099 | 29014146 | CSAR_peak_ | 8.39          | + |
| chr1 | 29070307 | 29070350 | CSAR_peak_ | 11.14         | + |
| chr1 | 29118607 | 29118639 | CSAR_peak_ | 9.58          | + |
| chr1 | 29119715 | 29119759 | CSAR_peak_ | 9.58          | + |
| chr1 | 29122721 | 29122767 | CSAR_peak_ | 7.58          | + |
| chr1 | 29123743 | 29123794 | CSAR_peak_ | 8.13,16.05    | + |
| chr1 | 29123880 | 29123924 | CSAR_peak_ | 14.88,7.58    | + |
| chr1 | 29123986 | 29124050 | CSAR_peak_ | 6.03          | + |

|      |          |          |             |                  |   |
|------|----------|----------|-------------|------------------|---|
| chr1 | 29124109 | 29124132 | CSAR_peak_0 | 5.62             | + |
| chr1 | 29124414 | 29124477 | CSAR_peak_0 | 8.39             | + |
| chr1 | 29124622 | 29124726 | CSAR_peak_0 | 5.62,8.95        | + |
| chr1 | 29131588 | 29131629 | CSAR_peak_0 | 9.58             | + |
| chr1 | 29131746 | 29131771 | CSAR_peak_0 | 8.65             | + |
| chr1 | 29136075 | 29136142 | CSAR_peak_0 | 8.39,7.34        | + |
| chr1 | 29136357 | 29136434 | CSAR_peak_0 | 8.39             | + |
| chr1 | 29136497 | 29136548 | CSAR_peak_0 | 7.27             | + |
| chr1 | 29136563 | 29136706 | CSAR_peak_0 | 13.51,9.58,10.95 | + |
| chr1 | 29136998 | 29137042 | CSAR_peak_0 | 8.39,6.95        | + |
| chr1 | 29137095 | 29137152 | CSAR_peak_0 | 17.82,8.44       | + |
| chr1 | 29137161 | 29137201 | CSAR_peak_0 | 10.95            | + |
| chr1 | 29137210 | 29137282 | CSAR_peak_0 | 7.58             | + |
| chr1 | 29220999 | 29221060 | CSAR_peak_0 | 6.03,13.48       | + |
| chr1 | 29221124 | 29221175 | CSAR_peak_0 | 7.27             | + |
| chr1 | 29221398 | 29221463 | CSAR_peak_0 | 7.27             | + |
| chr1 | 29223561 | 29223612 | CSAR_peak_0 | 10.95            | + |
| chr1 | 29253588 | 29253624 | CSAR_peak_0 | 6.03             | + |
| chr1 | 29254974 | 29255032 | CSAR_peak_0 | 8.39             | + |
| chr1 | 29255422 | 29255471 | CSAR_peak_0 | 7.92,6.21,6.9    | + |
| chr1 | 29255544 | 29255551 | CSAR_peak_0 | 6.21             | + |
| chr1 | 29255720 | 29255785 | CSAR_peak_0 | 8.65             | + |
| chr1 | 29255869 | 29255892 | CSAR_peak_0 | 6.57             | + |
| chr1 | 29255963 | 29256030 | CSAR_peak_0 | 6.95,9.97,5.6    | + |
| chr1 | 29256156 | 29256249 | CSAR_peak_0 | 7.27             | + |
| chr1 | 29256470 | 29256512 | CSAR_peak_0 | 5.62             | + |
| chr1 | 29257842 | 29257893 | CSAR_peak_0 | 6.57,7.27        | + |
| chr1 | 29257990 | 29258003 | CSAR_peak_0 | 8.39             | + |
| chr1 | 29259008 | 29259057 | CSAR_peak_0 | 10.02,6.21       | + |
| chr1 | 29273166 | 29273215 | CSAR_peak_0 | 7.27             | + |
| chr1 | 29274825 | 29274869 | CSAR_peak_0 | 6.21             | + |
| chr1 | 29292845 | 29292893 | CSAR_peak_0 | 6.21             | + |
| chr1 | 29301653 | 29301707 | CSAR_peak_0 | 13.44            | + |
| chr1 | 29346043 | 29346155 | CSAR_peak_0 | 10.17,7.36       | + |
| chr1 | 29346400 | 29346490 | CSAR_peak_0 | 9.58,10.31,10.95 | + |
| chr1 | 29346541 | 29346647 | CSAR_peak_0 | 6.44             | + |
| chr1 | 29346741 | 29346832 | CSAR_peak_0 | 5.95,9.03        | + |
| chr1 | 29346889 | 29346991 | CSAR_peak_0 | 12.13            | + |
| chr1 | 29355067 | 29355116 | CSAR_peak_0 | 16.33,5.67,10.95 | + |
| chr1 | 29355203 | 29355292 | CSAR_peak_0 | 18.1,6.1         | + |
| chr1 | 29355299 | 29355516 | CSAR_peak_0 | 12.89,6.89,10.95 | + |
| chr1 | 29355518 | 29355563 | CSAR_peak_0 | 9.89,8.85        | + |

|      |          |          |            |                 |
|------|----------|----------|------------|-----------------|
| chr1 | 29355569 | 29355642 | CSAR_peak_ | 10.64,13.3,6. + |
| chr1 | 29355669 | 29355720 | CSAR_peak_ | 5.62 +          |
| chr1 | 29355739 | 29355764 | CSAR_peak_ | 9.32 +          |
| chr1 | 29355773 | 29355900 | CSAR_peak_ | 18.73,30.25,+   |
| chr1 | 29356016 | 29356076 | CSAR_peak_ | 10.83 +         |
| chr1 | 29356131 | 29356217 | CSAR_peak_ | 19.36,9.77 +    |
| chr1 | 29356352 | 29356453 | CSAR_peak_ | 16.92,7.78 +    |
| chr1 | 29356508 | 29356748 | CSAR_peak_ | 13.82,5.96,2:+  |
| chr1 | 29356956 | 29357006 | CSAR_peak_ | 8.39 +          |
| chr1 | 29357023 | 29357108 | CSAR_peak_ | 11.66,18.95,+   |
| chr1 | 29357110 | 29357220 | CSAR_peak_ | 17.37,19.36,(+  |
| chr1 | 29357245 | 29357308 | CSAR_peak_ | 6.1,20.43,8.3+  |
| chr1 | 29357311 | 29357359 | CSAR_peak_ | 10.25 +         |
| chr1 | 29357368 | 29357406 | CSAR_peak_ | 5.65,6.36 +     |
| chr1 | 29357415 | 29357635 | CSAR_peak_ | 7.89,6.21,38.+  |
| chr1 | 29357670 | 29357684 | CSAR_peak_ | 6.85,6.95 +     |
| chr1 | 29357710 | 29357782 | CSAR_peak_ | 12.74,14.76 +   |
| chr1 | 29357818 | 29357892 | CSAR_peak_ | 5.62,9.77 +     |
| chr1 | 29357910 | 29358189 | CSAR_peak_ | 8.9,9.76,8.53+  |
| chr1 | 29358313 | 29358423 | CSAR_peak_ | 14.88,6.85 +    |
| chr1 | 29358486 | 29358564 | CSAR_peak_ | 6.02 +          |
| chr1 | 29358572 | 29358626 | CSAR_peak_ | 10.95,7.26 +    |
| chr1 | 29358701 | 29358713 | CSAR_peak_ | 6.21 +          |
| chr1 | 29358756 | 29358863 | CSAR_peak_ | 9.97 +          |
| chr1 | 29364312 | 29364361 | CSAR_peak_ | 8.65 +          |
| chr1 | 29364762 | 29364839 | CSAR_peak_ | 16.33 +         |
| chr1 | 29365152 | 29365203 | CSAR_peak_ | 6.45 +          |
| chr1 | 29365504 | 29365570 | CSAR_peak_ | 6.25 +          |
| chr1 | 29365682 | 29365813 | CSAR_peak_ | 8.89,7.51 +     |
| chr1 | 29388799 | 29388885 | CSAR_peak_ | 7.92 +          |
| chr1 | 29422229 | 29422363 | CSAR_peak_ | 187.8,120.81+   |
| chr1 | 29430663 | 29430778 | CSAR_peak_ | 19.36,9.58 +    |
| chr1 | 29430801 | 29430824 | CSAR_peak_ | 6.21 +          |
| chr1 | 29430889 | 29430936 | CSAR_peak_ | 10.83 +         |
| chr1 | 29431811 | 29431932 | CSAR_peak_ | 9.58,8.95 +     |
| chr1 | 29432179 | 29432235 | CSAR_peak_ | 6.21,8.39 +     |
| chr1 | 29452770 | 29452816 | CSAR_peak_ | 16.33 +         |
| chr1 | 29452895 | 29452957 | CSAR_peak_ | 16.33 +         |
| chr1 | 29453067 | 29453179 | CSAR_peak_ | 12.17,12.17,(+  |
| chr1 | 29453200 | 29453280 | CSAR_peak_ | 13.51,10.31 +   |
| chr1 | 29453368 | 29453437 | CSAR_peak_ | 6.21,10.83 +    |
| chr1 | 29453505 | 29453574 | CSAR_peak_ | 7.27,8.65 +     |



|      |          |          |             |                   |   |
|------|----------|----------|-------------|-------------------|---|
| chr1 | 29453621 | 29453729 | CSAR_peak_1 | 14.76             | + |
| chr1 | 29453809 | 29453944 | CSAR_peak_1 | 16.33,24.17,16.33 | + |
| chr1 | 29453971 | 29454136 | CSAR_peak_1 | 11.28,9.97,21.28  | + |
| chr1 | 29454138 | 29454258 | CSAR_peak_1 | 6.44,14.12        | + |
| chr1 | 29454342 | 29454374 | CSAR_peak_1 | 11.63             | + |
| chr1 | 29454523 | 29454599 | CSAR_peak_1 | 7.06,13.66        | + |
| chr1 | 29454643 | 29454686 | CSAR_peak_1 | 6.72              | + |
| chr1 | 29454721 | 29454832 | CSAR_peak_1 | 6.32,10.31,7.06   | + |
| chr1 | 29454837 | 29454922 | CSAR_peak_1 | 22.41,8.48        | + |
| chr1 | 29454984 | 29455120 | CSAR_peak_1 | 8.09,18.55,16.33  | + |
| chr1 | 29455147 | 29455197 | CSAR_peak_1 | 5.62              | + |
| chr1 | 29455203 | 29455219 | CSAR_peak_1 | 9.4,10.53,7.7     | + |
| chr1 | 29455221 | 29455339 | CSAR_peak_1 | 10.52,29.4        | + |
| chr1 | 29455392 | 29455511 | CSAR_peak_1 | 6.74,24.21,16.33  | + |
| chr1 | 29455548 | 29455649 | CSAR_peak_1 | 11.34,6.14        | + |
| chr1 | 29455777 | 29455845 | CSAR_peak_1 | 10.58,11.99       | + |
| chr1 | 29455884 | 29455916 | CSAR_peak_1 | 6.57,16.33        | + |
| chr1 | 29455991 | 29456222 | CSAR_peak_1 | 10.96,8.53,9.97   | + |
| chr1 | 29456352 | 29456402 | CSAR_peak_1 | 10.17             | + |
| chr1 | 29456483 | 29456643 | CSAR_peak_1 | 11.28,8.39        | + |
| chr1 | 29456721 | 29456905 | CSAR_peak_1 | 6.95,8.39,14.12   | + |
| chr1 | 29456988 | 29457114 | CSAR_peak_1 | 16.33,14,10.17    | + |
| chr1 | 29457779 | 29457948 | CSAR_peak_1 | 17.86,13.48       | + |
| chr1 | 29458071 | 29458130 | CSAR_peak_1 | 7.27,7.27         | + |
| chr1 | 29505336 | 29505385 | CSAR_peak_1 | 6.21              | + |
| chr1 | 29505406 | 29505460 | CSAR_peak_1 | 8.39              | + |
| chr1 | 29505899 | 29505953 | CSAR_peak_1 | 9.77              | + |
| chr1 | 29506056 | 29506135 | CSAR_peak_1 | 5.62,7.92         | + |
| chr1 | 29506601 | 29506649 | CSAR_peak_1 | 5.62              | + |
| chr1 | 29507227 | 29507285 | CSAR_peak_1 | 6.21              | + |
| chr1 | 29551011 | 29551071 | CSAR_peak_1 | 9.77              | + |
| chr1 | 29552171 | 29552233 | CSAR_peak_1 | 9.58              | + |
| chr1 | 29564952 | 29564998 | CSAR_peak_1 | 5.62              | + |
| chr1 | 29565077 | 29565135 | CSAR_peak_1 | 5.62              | + |
| chr1 | 29567722 | 29567904 | CSAR_peak_1 | 9.27,8.65,6.5     | + |
| chr1 | 29567997 | 29568079 | CSAR_peak_1 | 6.03,10.95,6.03   | + |
| chr1 | 29568084 | 29568248 | CSAR_peak_1 | 21.74,7.92,16.33  | + |
| chr1 | 29568364 | 29568437 | CSAR_peak_1 | 8.75              | + |
| chr1 | 29568445 | 29568477 | CSAR_peak_1 | 10.94             | + |
| chr1 | 29568661 | 29568679 | CSAR_peak_1 | 8.39              | + |
| chr1 | 29568730 | 29568842 | CSAR_peak_1 | 8.39,19.93        | + |
| chr1 | 29568960 | 29569015 | CSAR_peak_1 | 13.48,7.27        | + |

|      |          |          |            |               |   |
|------|----------|----------|------------|---------------|---|
| chr1 | 29576137 | 29576249 | CSAR_peak_ | 8.65          | + |
| chr1 | 29576970 | 29577002 | CSAR_peak_ | 7.27,6.21     | + |
| chr1 | 29577029 | 29577105 | CSAR_peak_ | 13.44         | + |
| chr1 | 29585884 | 29585940 | CSAR_peak_ | 7.92          | + |
| chr1 | 29585989 | 29586134 | CSAR_peak_ | 6.21,9.58,7.5 | + |
| chr1 | 29586301 | 29586446 | CSAR_peak_ | 7.92,8.65,9.7 | + |
| chr1 | 29586476 | 29586599 | CSAR_peak_ | 7.56,42.87,1  | + |
| chr1 | 29586707 | 29586747 | CSAR_peak_ | 8.39          | + |
| chr1 | 29586785 | 29586880 | CSAR_peak_ | 9.27,7.27     | + |
| chr1 | 29587078 | 29587163 | CSAR_peak_ | 34.13,7.47    | + |
| chr1 | 29587280 | 29587325 | CSAR_peak_ | 6.57          | + |
| chr1 | 29587337 | 29587352 | CSAR_peak_ | 14.88         | + |
| chr1 | 29587376 | 29587582 | CSAR_peak_ | 25.18,7.27,1  | + |
| chr1 | 29587675 | 29587797 | CSAR_peak_ | 8.61,8.65,12  | + |
| chr1 | 29587811 | 29588025 | CSAR_peak_ | 6.87,12.5,8.3 | + |
| chr1 | 29588597 | 29588628 | CSAR_peak_ | 7.27,8.39     | + |
| chr1 | 29591646 | 29591729 | CSAR_peak_ | 6.57          | + |
| chr1 | 29592941 | 29592995 | CSAR_peak_ | 10.83,8.39    | + |
| chr1 | 29593080 | 29593123 | CSAR_peak_ | 8.65          | + |
| chr1 | 29594561 | 29594609 | CSAR_peak_ | 12.13         | + |
| chr1 | 29595836 | 29595861 | CSAR_peak_ | 6.21          | + |
| chr1 | 29596082 | 29596134 | CSAR_peak_ | 7.27          | + |
| chr1 | 29598119 | 29598164 | CSAR_peak_ | 6.21          | + |
| chr1 | 29599873 | 29599924 | CSAR_peak_ | 5.62          | + |
| chr1 | 29600018 | 29600061 | CSAR_peak_ | 7.27          | + |
| chr1 | 29650559 | 29650625 | CSAR_peak_ | 12.17,6.03    | + |
| chr1 | 29650723 | 29650751 | CSAR_peak_ | 6.57          | + |
| chr1 | 29650801 | 29650896 | CSAR_peak_ | 9.77,12.13    | + |
| chr1 | 29652007 | 29652047 | CSAR_peak_ | 7.89          | + |
| chr1 | 29660497 | 29660541 | CSAR_peak_ | 21.37         | + |
| chr1 | 29660864 | 29660917 | CSAR_peak_ | 8.95,7.68     | + |
| chr1 | 29661030 | 29661086 | CSAR_peak_ | 6.02          | + |
| chr1 | 29661156 | 29661223 | CSAR_peak_ | 8.61,16.05,5  | + |
| chr1 | 29661329 | 29661387 | CSAR_peak_ | 11.38         | + |
| chr1 | 29661558 | 29661566 | CSAR_peak_ | 6.87          | + |
| chr1 | 29661678 | 29661788 | CSAR_peak_ | 12.31,7.92    | + |
| chr1 | 29662319 | 29662349 | CSAR_peak_ | 7.27          | + |
| chr1 | 29662839 | 29662900 | CSAR_peak_ | 7.92          | + |
| chr1 | 29662904 | 29662946 | CSAR_peak_ | 18.95         | + |
| chr1 | 29663109 | 29663167 | CSAR_peak_ | 8.13          | + |
| chr1 | 29663185 | 29663229 | CSAR_peak_ | 6.95          | + |
| chr1 | 29663648 | 29663701 | CSAR_peak_ | 7.34          | + |

|      |          |          |            |               |   |
|------|----------|----------|------------|---------------|---|
| chr1 | 29663948 | 29663966 | CSAR_peak_ | 6.03          | + |
| chr1 | 29664311 | 29664326 | CSAR_peak_ | 7.27          | + |
| chr1 | 29664533 | 29664587 | CSAR_peak_ | 11.28         | + |
| chr1 | 29704466 | 29704574 | CSAR_peak_ | 7.73          | + |
| chr1 | 29704936 | 29705018 | CSAR_peak_ | 21.94,13.48   | + |
| chr1 | 29705246 | 29705295 | CSAR_peak_ | 13.48         | + |
| chr1 | 29706597 | 29706614 | CSAR_peak_ | 6.57          | + |
| chr1 | 29706705 | 29706756 | CSAR_peak_ | 6.21          | + |
| chr1 | 29707228 | 29707307 | CSAR_peak_ | 6.21          | + |
| chr1 | 29736047 | 29736130 | CSAR_peak_ | 7.73,6.45     | + |
| chr1 | 29736167 | 29736191 | CSAR_peak_ | 7.27          | + |
| chr1 | 29736459 | 29736518 | CSAR_peak_ | 9.58          | + |
| chr1 | 29736566 | 29736688 | CSAR_peak_ | 8.65,6.44,10. | + |
| chr1 | 29816795 | 29816830 | CSAR_peak_ | 6.57          | + |
| chr1 | 29817039 | 29817069 | CSAR_peak_ | 6.57,7.58     | + |
| chr1 | 29817486 | 29817529 | CSAR_peak_ | 6.95,7.58,6.4 | + |
| chr1 | 29817753 | 29817809 | CSAR_peak_ | 12.13         | + |
| chr1 | 29817995 | 29818089 | CSAR_peak_ | 12.13         | + |
| chr1 | 29818268 | 29818384 | CSAR_peak_ | 22.58,7.47,6. | + |
| chr1 | 29818477 | 29818488 | CSAR_peak_ | 12.17         | + |
| chr1 | 29818505 | 29818536 | CSAR_peak_ | 8.39          | + |
| chr1 | 29833962 | 29834096 | CSAR_peak_ | 8.95,10.83,7. | + |
| chr1 | 29834145 | 29834201 | CSAR_peak_ | 10.83         | + |
| chr1 | 29834533 | 29834680 | CSAR_peak_ | 12.17,11.38   | + |
| chr1 | 29835054 | 29835180 | CSAR_peak_ | 6.94,7.27,7.9 | + |
| chr1 | 29843458 | 29843484 | CSAR_peak_ | 6.21          | + |
| chr1 | 29843517 | 29843560 | CSAR_peak_ | 6.57          | + |
| chr1 | 29843889 | 29843943 | CSAR_peak_ | 8.39,7.27     | + |
| chr1 | 29843985 | 29844021 | CSAR_peak_ | 7.27          | + |
| chr1 | 29860828 | 29860993 | CSAR_peak_ | 10.57,13.48   | + |
| chr1 | 29861146 | 29861250 | CSAR_peak_ | 18.95,13.51   | + |
| chr1 | 29861254 | 29861359 | CSAR_peak_ | 20.54         | + |
| chr1 | 29861398 | 29861567 | CSAR_peak_ | 9.58,17.1,5.9 | + |
| chr1 | 29861644 | 29861682 | CSAR_peak_ | 9.61          | + |
| chr1 | 29861694 | 29861871 | CSAR_peak_ | 20.54,9.97,7. | + |
| chr1 | 29861874 | 29861988 | CSAR_peak_ | 21.6,7.27,11. | + |
| chr1 | 29862000 | 29862080 | CSAR_peak_ | 11.37,6.84,6. | + |
| chr1 | 29862171 | 29862181 | CSAR_peak_ | 9.32          | + |
| chr1 | 29862192 | 29862277 | CSAR_peak_ | 7.11,8.48,10. | + |
| chr1 | 29862356 | 29862482 | CSAR_peak_ | 6.72,12.13,6. | + |
| chr1 | 29862591 | 29862850 | CSAR_peak_ | 29.2,12.17,6. | + |
| chr1 | 29863163 | 29863229 | CSAR_peak_ | 16.33,12.13   | + |

|      |          |          |            |                |   |
|------|----------|----------|------------|----------------|---|
| chr1 | 29947543 | 29947595 | CSAR_peak_ | 8.65           | + |
| chr1 | 29947884 | 29947912 | CSAR_peak_ | 6.21           | + |
| chr1 | 29989855 | 29989897 | CSAR_peak_ | 6.21           | + |
| chr1 | 29996913 | 29996973 | CSAR_peak_ | 6.95           | + |
| chr1 | 30071320 | 30071384 | CSAR_peak_ | 7.73           | + |
| chr1 | 30081208 | 30081277 | CSAR_peak_ | 38.89,34.67    | + |
| chr1 | 30083282 | 30083334 | CSAR_peak_ | 12.13          | + |
| chr1 | 30083487 | 30083530 | CSAR_peak_ | 6.21           | + |
| chr1 | 30085245 | 30085270 | CSAR_peak_ | 8.39           | + |
| chr1 | 30085857 | 30085913 | CSAR_peak_ | 16.33,6.02     | + |
| chr1 | 30086189 | 30086210 | CSAR_peak_ | 10.02          | + |
| chr1 | 30086433 | 30086470 | CSAR_peak_ | 8.39           | + |
| chr1 | 30087513 | 30087567 | CSAR_peak_ | 12.17          | + |
| chr1 | 30087667 | 30087738 | CSAR_peak_ | 6.03,9.77      | + |
| chr1 | 30087938 | 30088033 | CSAR_peak_ | 6.45,23.49     | + |
| chr1 | 30088540 | 30088583 | CSAR_peak_ | 7.34           | + |
| chr1 | 30088584 | 30088665 | CSAR_peak_ | 6.44,7.27      | + |
| chr1 | 30088883 | 30088928 | CSAR_peak_ | 7.58           | + |
| chr1 | 30089115 | 30089123 | CSAR_peak_ | 6.21           | + |
| chr1 | 30089776 | 30089827 | CSAR_peak_ | 6.03           | + |
| chr1 | 30090070 | 30090127 | CSAR_peak_ | 14.88,13.44    | + |
| chr1 | 30090211 | 30090296 | CSAR_peak_ | 11.66,13.44,   | + |
| chr1 | 30090709 | 30090744 | CSAR_peak_ | 6.21           | + |
| chr1 | 30091254 | 30091298 | CSAR_peak_ | 6.03           | + |
| chr1 | 30091300 | 30091375 | CSAR_peak_ | 20.43,10.02    | + |
| chr1 | 30091502 | 30091604 | CSAR_peak_ | 13.44,10.02    | + |
| chr1 | 30091611 | 30091649 | CSAR_peak_ | 7.26           | + |
| chr1 | 30092149 | 30092202 | CSAR_peak_ | 8.39           | + |
| chr1 | 30093395 | 30093440 | CSAR_peak_ | 7.27           | + |
| chr1 | 30093615 | 30093655 | CSAR_peak_ | 8.39           | + |
| chr1 | 30094033 | 30094069 | CSAR_peak_ | 6.03           | + |
| chr1 | 30094238 | 30094285 | CSAR_peak_ | 6.03           | + |
| chr1 | 30094533 | 30094592 | CSAR_peak_ | 6.21           | + |
| chr1 | 30096637 | 30096738 | CSAR_peak_ | 14.88,7.92,1(+ |   |
| chr1 | 30099746 | 30099802 | CSAR_peak_ | 7.27           | + |
| chr1 | 30118706 | 30118765 | CSAR_peak_ | 11.66          | + |
| chr1 | 30120991 | 30121047 | CSAR_peak_ | 8.39           | + |
| chr1 | 30122328 | 30122398 | CSAR_peak_ | 8.39,17.82     | + |
| chr1 | 30122935 | 30122970 | CSAR_peak_ | 10.83          | + |
| chr1 | 30123850 | 30123911 | CSAR_peak_ | 9.27           | + |
| chr1 | 30160148 | 30160178 | CSAR_peak_ | 8.39           | + |
| chr1 | 30217783 | 30218040 | CSAR_peak_ | 7.29,19.36,1(+ |   |

|      |          |          |            |               |   |
|------|----------|----------|------------|---------------|---|
| chr1 | 30218156 | 30218202 | CSAR_peak_ | 7.27          | + |
| chr1 | 30218281 | 30218418 | CSAR_peak_ | 21.56,16.11,  | + |
| chr1 | 30218424 | 30218680 | CSAR_peak_ | 17.37,16.05,  | + |
| chr1 | 30218739 | 30218843 | CSAR_peak_ | 26.62,10.86,  | + |
| chr1 | 30218860 | 30218953 | CSAR_peak_ | 6.57,29.2,18. | + |
| chr1 | 30218982 | 30219104 | CSAR_peak_ | 8.95,8.13,6.3 | + |
| chr1 | 30219171 | 30219205 | CSAR_peak_ | 16.33         | + |
| chr1 | 30219230 | 30219363 | CSAR_peak_ | 16.11,6.21,1  | + |
| chr1 | 30219367 | 30219411 | CSAR_peak_ | 10.83         | + |
| chr1 | 30219445 | 30219575 | CSAR_peak_ | 18.65,9.28,8. | + |
| chr1 | 30219744 | 30219789 | CSAR_peak_ | 7.92          | + |
| chr1 | 30219984 | 30220042 | CSAR_peak_ | 8.39          | + |
| chr1 | 30220164 | 30220420 | CSAR_peak_ | 10.31,15,6.2  | + |
| chr1 | 30221972 | 30222041 | CSAR_peak_ | 7.34,6.03     | + |
| chr1 | 30241743 | 30241814 | CSAR_peak_ | 8.39          | + |
| chr1 | 30241837 | 30241868 | CSAR_peak_ | 7.27          | + |
| chr1 | 30242189 | 30242250 | CSAR_peak_ | 6.95,9.27     | + |
| chr1 | 30242279 | 30242357 | CSAR_peak_ | 16.05,6.95    | + |
| chr1 | 30242553 | 30242598 | CSAR_peak_ | 6.57          | + |
| chr1 | 30242601 | 30242633 | CSAR_peak_ | 9.97          | + |
| chr1 | 30242685 | 30242878 | CSAR_peak_ | 7.95,8.39,7.5 | + |
| chr1 | 30243184 | 30243346 | CSAR_peak_ | 10.83,7.2     | + |
| chr1 | 30288886 | 30288933 | CSAR_peak_ | 5.62          | + |
| chr1 | 30289869 | 30289911 | CSAR_peak_ | 7.27          | + |
| chr1 | 30315444 | 30315497 | CSAR_peak_ | 9.77          | + |
| chr1 | 30328084 | 30328217 | CSAR_peak_ | 41.83,17.01,  | + |
| chr1 | 30361129 | 30361181 | CSAR_peak_ | 8.39,7.58     | + |
| chr1 | 30361383 | 30361448 | CSAR_peak_ | 10.02,11.14,  | + |
| chr1 | 30361564 | 30361605 | CSAR_peak_ | 12.13         | + |
| chr1 | 30361849 | 30361913 | CSAR_peak_ | 6.95          | + |
| chr1 | 30361997 | 30362043 | CSAR_peak_ | 8.39          | + |
| chr1 | 30362315 | 30362358 | CSAR_peak_ | 6.57,8.13     | + |
| chr1 | 30362472 | 30362527 | CSAR_peak_ | 8.65,11.14    | + |
| chr1 | 30363863 | 30363908 | CSAR_peak_ | 6.03          | + |
| chr1 | 30364501 | 30364551 | CSAR_peak_ | 7.27          | + |
| chr1 | 30383766 | 30383926 | CSAR_peak_ | 8.95,6.2,32.2 | + |
| chr1 | 30384136 | 30384223 | CSAR_peak_ | 8.28,10.83    | + |
| chr1 | 30384304 | 30384779 | CSAR_peak_ | 19.73,6.02,1  | + |
| chr1 | 30384827 | 30384976 | CSAR_peak_ | 6.31,11.75,6. | + |
| chr1 | 30384982 | 30385026 | CSAR_peak_ | 5.91          | + |
| chr1 | 30385044 | 30385099 | CSAR_peak_ | 6.03,7.27     | + |
| chr1 | 30385115 | 30385192 | CSAR_peak_ | 7.7           | + |

|      |          |          |            |                   |   |
|------|----------|----------|------------|-------------------|---|
| chr1 | 30385314 | 30385565 | CSAR_peak_ | 19.93,16.05,16.05 | + |
| chr1 | 30385619 | 30385663 | CSAR_peak_ | 6.21              | + |
| chr1 | 30385673 | 30385779 | CSAR_peak_ | 9.77,7.27         | + |
| chr1 | 30386131 | 30386195 | CSAR_peak_ | 16.33,16.33       | + |
| chr1 | 30411331 | 30411405 | CSAR_peak_ | 13.51,9.58        | + |
| chr1 | 30411534 | 30411613 | CSAR_peak_ | 6.03,10.83        | + |
| chr1 | 8417     | 8465     | CSAR_peak_ | 10.02             | - |
| chr1 | 32547    | 32598    | CSAR_peak_ | 7.27              | - |
| chr1 | 36840    | 36861    | CSAR_peak_ | 6.21              | - |
| chr1 | 36877    | 36912    | CSAR_peak_ | 6.1               | - |
| chr1 | 37023    | 37062    | CSAR_peak_ | 6.21              | - |
| chr1 | 47718    | 47822    | CSAR_peak_ | 11.63,19.36       | - |
| chr1 | 48075    | 48135    | CSAR_peak_ | 6.21              | - |
| chr1 | 48747    | 48844    | CSAR_peak_ | 7.27,7.27         | - |
| chr1 | 48958    | 49014    | CSAR_peak_ | 8.39              | - |
| chr1 | 50317    | 50354    | CSAR_peak_ | 6.52              | - |
| chr1 | 50448    | 50502    | CSAR_peak_ | 8.14              | - |
| chr1 | 50605    | 50632    | CSAR_peak_ | 10.02,7.27        | - |
| chr1 | 50883    | 50964    | CSAR_peak_ | 20.43             | - |
| chr1 | 57410    | 57466    | CSAR_peak_ | 7.27              | - |
| chr1 | 57578    | 57703    | CSAR_peak_ | 9.58              | - |
| chr1 | 57894    | 57995    | CSAR_peak_ | 10.83             | - |
| chr1 | 58708    | 58752    | CSAR_peak_ | 7.27              | - |
| chr1 | 58918    | 58986    | CSAR_peak_ | 9.58,7.92         | - |
| chr1 | 61894    | 61944    | CSAR_peak_ | 6.21              | - |
| chr1 | 62050    | 62125    | CSAR_peak_ | 12.13,19.36       | - |
| chr1 | 63198    | 63251    | CSAR_peak_ | 8.39              | - |
| chr1 | 63515    | 63566    | CSAR_peak_ | 7.78              | - |
| chr1 | 63601    | 63721    | CSAR_peak_ | 16,28.94          | - |
| chr1 | 63748    | 63826    | CSAR_peak_ | 14.85,9.61        | - |
| chr1 | 63906    | 64070    | CSAR_peak_ | 6.87,9.58,9.58    | - |
| chr1 | 64123    | 64176    | CSAR_peak_ | 9.58              | - |
| chr1 | 64266    | 64304    | CSAR_peak_ | 7.27              | - |
| chr1 | 64381    | 64476    | CSAR_peak_ | 27.38,23.95       | - |
| chr1 | 64561    | 64769    | CSAR_peak_ | 8.14,35.33,5.14   | - |
| chr1 | 64791    | 64879    | CSAR_peak_ | 11.38,20.43       | - |
| chr1 | 64888    | 65022    | CSAR_peak_ | 24.52,7.27,27.27  | - |
| chr1 | 65101    | 65248    | CSAR_peak_ | 18.28,42.13       | - |
| chr1 | 65266    | 65298    | CSAR_peak_ | 7.27              | - |
| chr1 | 65319    | 65675    | CSAR_peak_ | 34.11,40.41,40.41 | - |
| chr1 | 65716    | 65947    | CSAR_peak_ | 26.05,8.61,11.38  | - |
| chr1 | 65961    | 66206    | CSAR_peak_ | 16.08,34.62       | - |

|      |        |        |            |                 |
|------|--------|--------|------------|-----------------|
| chr1 | 66225  | 66379  | CSAR_peak_ | 8.14,27.24,3:-  |
| chr1 | 66450  | 66518  | CSAR_peak_ | 6.54,19.21 -    |
| chr1 | 66552  | 66598  | CSAR_peak_ | (10.02,14.88,-  |
| chr1 | 66672  | 66780  | CSAR_peak_ | 31.83,19.68 -   |
| chr1 | 66835  | 66898  | CSAR_peak_ | 16.54,13.29 -   |
| chr1 | 66929  | 66981  | CSAR_peak_ | ( 12.13 -       |
| chr1 | 67165  | 67218  | CSAR_peak_ | (8.39,6.21 -    |
| chr1 | 67225  | 67499  | CSAR_peak_ | (35.83,6.1,19.- |
| chr1 | 67514  | 67570  | CSAR_peak_ | 9.84,20.18 -    |
| chr1 | 74661  | 74722  | CSAR_peak_ | 7.27,8.39 -     |
| chr1 | 116849 | 116921 | CSAR_peak_ | ( 12.31 -       |
| chr1 | 117161 | 117246 | CSAR_peak_ | 12.59,19.98 -   |
| chr1 | 117286 | 117394 | CSAR_peak_ | 18.4,11.38,7.-  |
| chr1 | 117620 | 117666 | CSAR_peak_ | 7.58,7.58 -     |
| chr1 | 117922 | 117983 | CSAR_peak_ | ( 12.13 -       |
| chr1 | 118315 | 118380 | CSAR_peak_ | 12.13 -         |
| chr1 | 121305 | 121373 | CSAR_peak_ | (14.88,7.27 -   |
| chr1 | 121704 | 121927 | CSAR_peak_ | 19.36,19.36,-   |
| chr1 | 122284 | 122346 | CSAR_peak_ | ( 7.27 -        |
| chr1 | 122505 | 122635 | CSAR_peak_ | 14.63,18.73,-   |
| chr1 | 122795 | 122856 | CSAR_peak_ | 6.21 -          |
| chr1 | 122946 | 123024 | CSAR_peak_ | (13.48,6.21 -   |
| chr1 | 123145 | 123190 | CSAR_peak_ | ( 7.27 -        |
| chr1 | 123216 | 123323 | CSAR_peak_ | ( 13.48 -       |
| chr1 | 123338 | 123502 | CSAR_peak_ | (35.24,18.65 -  |
| chr1 | 123579 | 123670 | CSAR_peak_ | (27.73,14.34,-  |
| chr1 | 123789 | 123876 | CSAR_peak_ | 13.44,7.58 -    |
| chr1 | 123992 | 124055 | CSAR_peak_ | 6.21,6.54 -     |
| chr1 | 124226 | 124319 | CSAR_peak_ | 9.58 -          |
| chr1 | 124591 | 124633 | CSAR_peak_ | 8.65 -          |
| chr1 | 124787 | 124819 | CSAR_peak_ | 5.79,13.48 -    |
| chr1 | 124921 | 125006 | CSAR_peak_ | 8.9,6.81,19.3-  |
| chr1 | 125149 | 125227 | CSAR_peak_ | (17.4,29.4 -    |
| chr1 | 125329 | 125434 | CSAR_peak_ | 12.13,19.36 -   |
| chr1 | 125501 | 125562 | CSAR_peak_ | 17.82 -         |
| chr1 | 125646 | 125656 | CSAR_peak_ | ( 9.58 -        |
| chr1 | 125733 | 125867 | CSAR_peak_ | 9.72,52.34,1:-  |
| chr1 | 125932 | 126011 | CSAR_peak_ | 32.07,28.12 -   |
| chr1 | 126076 | 126182 | CSAR_peak_ | (7.27,13.29 -   |
| chr1 | 126305 | 126406 | CSAR_peak_ | 12.13,31.2 -    |
| chr1 | 126412 | 126473 | CSAR_peak_ | 9.77 -          |
| chr1 | 126700 | 126743 | CSAR_peak_ | 7.27 -          |

|      |        |        |                           |
|------|--------|--------|---------------------------|
| chr1 | 126938 | 127059 | CSAR_peak_(9.31,12.6,7.2- |
| chr1 | 127656 | 127783 | CSAR_peak_(17.82,13.85 -  |
| chr1 | 127870 | 127941 | CSAR_peak_(20.13,17.37 -  |
| chr1 | 128103 | 128207 | CSAR_peak_(14.88,6.95 -   |
| chr1 | 128251 | 128292 | CSAR_peak_ 14.88 -        |
| chr1 | 128489 | 128601 | CSAR_peak_(22.74,12.13,-  |
| chr1 | 128968 | 129093 | CSAR_peak_(6.21,17.82,1-  |
| chr1 | 129853 | 129906 | CSAR_peak_(9.32,21.94 -   |
| chr1 | 130082 | 130132 | CSAR_peak_( 7.58 -        |
| chr1 | 157252 | 157281 | CSAR_peak_ 6.81 -         |
| chr1 | 159971 | 159999 | CSAR_peak_( 8.39 -        |
| chr1 | 170466 | 170506 | CSAR_peak_ 10.83 -        |
| chr1 | 171060 | 171128 | CSAR_peak_ 10.83 -        |
| chr1 | 171140 | 171205 | CSAR_peak_(13.48,24.21 -  |
| chr1 | 171292 | 171392 | CSAR_peak_(14.85,10.83 -  |
| chr1 | 171412 | 171498 | CSAR_peak_ 6.21 -         |
| chr1 | 171571 | 171884 | CSAR_peak_(31.19,30.81,-  |
| chr1 | 171924 | 172098 | CSAR_peak_(12.13,7.58,1-  |
| chr1 | 172139 | 172185 | CSAR_peak_(8.39,13.44 -   |
| chr1 | 172190 | 172307 | CSAR_peak_(46.16,22.71 -  |
| chr1 | 172364 | 172876 | CSAR_peak_(38.23,54.88,-  |
| chr1 | 180307 | 180357 | CSAR_peak_( 14.88 -       |
| chr1 | 180466 | 180517 | CSAR_peak_(7.27,6.21 -    |
| chr1 | 180597 | 180729 | CSAR_peak_(8.2,20.94,16.- |
| chr1 | 180752 | 180853 | CSAR_peak_(21.11,10.94,-  |
| chr1 | 181364 | 181423 | CSAR_peak_ 9.58 -         |
| chr1 | 182061 | 182097 | CSAR_peak_ 12.17 -        |
| chr1 | 222213 | 222288 | CSAR_peak_(7.27,9.58 -    |
| chr1 | 222622 | 222654 | CSAR_peak_ 6.21 -         |
| chr1 | 225874 | 225967 | CSAR_peak_(13.48,9.27 -   |
| chr1 | 226155 | 226336 | CSAR_peak_(26.55,21.56 -  |
| chr1 | 226396 | 226450 | CSAR_peak_( 9.77 -        |
| chr1 | 226465 | 226546 | CSAR_peak_( 7.58 -        |
| chr1 | 226568 | 226725 | CSAR_peak_ 20.18 -        |
| chr1 | 226842 | 226938 | CSAR_peak_ 16.54 -        |
| chr1 | 227070 | 227134 | CSAR_peak_(12.17,12.13 -  |
| chr1 | 227182 | 227237 | CSAR_peak_(24.21,12.13 -  |
| chr1 | 230945 | 230995 | CSAR_peak_( 7.27 -        |
| chr1 | 231270 | 231372 | CSAR_peak_ 12.13 -        |
| chr1 | 231585 | 231676 | CSAR_peak_(12.13,17.82 -  |
| chr1 | 231934 | 231983 | CSAR_peak_ 7 -            |
| chr1 | 231989 | 232030 | CSAR_peak_ 9.58 -         |



|      |        |        |            |                   |   |
|------|--------|--------|------------|-------------------|---|
| chr1 | 232257 | 232293 | CSAR_peak_ | 7.58              | - |
| chr1 | 232414 | 232470 | CSAR_peak_ | 9.58              | - |
| chr1 | 232621 | 232761 | CSAR_peak_ | 14.88,25.91       | - |
| chr1 | 233138 | 233209 | CSAR_peak_ | 7.27              | - |
| chr1 | 233219 | 233662 | CSAR_peak_ | 12.72,7.27,11.88  | - |
| chr1 | 233712 | 233822 | CSAR_peak_ | 34.26,40.72       | - |
| chr1 | 233826 | 233922 | CSAR_peak_ | 12.27,12.74       | - |
| chr1 | 234073 | 234151 | CSAR_peak_ | 9.58              | - |
| chr1 | 234237 | 234355 | CSAR_peak_ | 16.34,35.24       | - |
| chr1 | 234394 | 234509 | CSAR_peak_ | 9.58,5.86,9.58    | - |
| chr1 | 234529 | 234670 | CSAR_peak_ | 5.62,16.33,21.24  | - |
| chr1 | 234682 | 234745 | CSAR_peak_ | 7.26,14.88        | - |
| chr1 | 234770 | 234850 | CSAR_peak_ | 8.39              | - |
| chr1 | 234938 | 235088 | CSAR_peak_ | 17.4,12.13,8.39   | - |
| chr1 | 235198 | 235427 | CSAR_peak_ | 17.82,15.9,9.58   | - |
| chr1 | 235718 | 235932 | CSAR_peak_ | 7.92,17.82,9.58   | - |
| chr1 | 235976 | 236231 | CSAR_peak_ | 12.55,17.87,11.88 | - |
| chr1 | 236246 | 236297 | CSAR_peak_ | 21.24             | - |
| chr1 | 236429 | 236549 | CSAR_peak_ | 32.77,22.41,11.88 | - |
| chr1 | 236673 | 236758 | CSAR_peak_ | 7.34,9.58         | - |
| chr1 | 236853 | 236951 | CSAR_peak_ | 8.95,7,14.88      | - |
| chr1 | 236983 | 237141 | CSAR_peak_ | 39.3,32.46,5.86   | - |
| chr1 | 237238 | 237279 | CSAR_peak_ | 6.21              | - |
| chr1 | 237343 | 237440 | CSAR_peak_ | 14.88,17.82       | - |
| chr1 | 237489 | 237680 | CSAR_peak_ | 6.44,17.82,11.88  | - |
| chr1 | 276706 | 276771 | CSAR_peak_ | 9.58              | - |
| chr1 | 276910 | 276978 | CSAR_peak_ | 13.48             | - |
| chr1 | 277536 | 277597 | CSAR_peak_ | 9.58              | - |
| chr1 | 296174 | 296216 | CSAR_peak_ | 9.58              | - |
| chr1 | 296434 | 296479 | CSAR_peak_ | 9.77              | - |
| chr1 | 296481 | 296536 | CSAR_peak_ | 8.9               | - |
| chr1 | 296682 | 296752 | CSAR_peak_ | 8.14              | - |
| chr1 | 296769 | 296863 | CSAR_peak_ | 8.2,9.58          | - |
| chr1 | 296937 | 296987 | CSAR_peak_ | 11.63,7.78        | - |
| chr1 | 297006 | 297026 | CSAR_peak_ | 7.27              | - |
| chr1 | 297541 | 297585 | CSAR_peak_ | 7.27              | - |
| chr1 | 297635 | 297700 | CSAR_peak_ | 12.13             | - |
| chr1 | 298999 | 299039 | CSAR_peak_ | 7.27              | - |
| chr1 | 313586 | 313642 | CSAR_peak_ | 10.95             | - |
| chr1 | 314237 | 314298 | CSAR_peak_ | 6.81              | - |
| chr1 | 314473 | 314522 | CSAR_peak_ | 9.77              | - |
| chr1 | 314534 | 314552 | CSAR_peak_ | 7.26              | - |

|      |        |        |             |               |   |
|------|--------|--------|-------------|---------------|---|
| chr1 | 314652 | 314702 | CSAR_peak_0 | 12.13         | - |
| chr1 | 314942 | 314990 | CSAR_peak_0 | 6.21          | - |
| chr1 | 315793 | 315875 | CSAR_peak_0 | 12.31,6.21    | - |
| chr1 | 320421 | 320458 | CSAR_peak_0 | 7.27          | - |
| chr1 | 330358 | 330414 | CSAR_peak_0 | 14.88,7.92    | - |
| chr1 | 330910 | 331016 | CSAR_peak_0 | 21.94,10.83   | - |
| chr1 | 331595 | 331668 | CSAR_peak_0 | 8.39          | - |
| chr1 | 334482 | 334567 | CSAR_peak_0 | 12.13         | - |
| chr1 | 335427 | 335489 | CSAR_peak_0 | 16.33         | - |
| chr1 | 335512 | 335565 | CSAR_peak_0 | 7.27          | - |
| chr1 | 336417 | 336514 | CSAR_peak_0 | 6.81,9.58,8.3 | - |
| chr1 | 336580 | 336622 | CSAR_peak_0 | 7.92          | - |
| chr1 | 336665 | 336710 | CSAR_peak_0 | 7.27          | - |
| chr1 | 388552 | 388595 | CSAR_peak_0 | 7.27          | - |
| chr1 | 388851 | 388899 | CSAR_peak_0 | 8.39          | - |
| chr1 | 389528 | 389597 | CSAR_peak_0 | 8.39          | - |
| chr1 | 400370 | 400433 | CSAR_peak_0 | 7.58          | - |
| chr1 | 403415 | 403482 | CSAR_peak_0 | 13.48,8.65    | - |
| chr1 | 403888 | 403966 | CSAR_peak_0 | 14.76,13.51   | - |
| chr1 | 404325 | 404375 | CSAR_peak_0 | 9.58          | - |
| chr1 | 442804 | 442872 | CSAR_peak_0 | 12.13         | - |
| chr1 | 443351 | 443424 | CSAR_peak_0 | 12.13,10.02   | - |
| chr1 | 443489 | 443526 | CSAR_peak_0 | 15.28,8.14,2  | - |
| chr1 | 443552 | 443591 | CSAR_peak_0 | 7.27          | - |
| chr1 | 443629 | 443691 | CSAR_peak_0 | 42.59,20.05,  | - |
| chr1 | 443704 | 443797 | CSAR_peak_0 | 11.66,12.59,  | - |
| chr1 | 443979 | 444014 | CSAR_peak_0 | 9.58          | - |
| chr1 | 444258 | 444319 | CSAR_peak_0 | 12.13,6.81,1  | - |
| chr1 | 444541 | 444681 | CSAR_peak_0 | 9.61,7,10.83, | - |
| chr1 | 444683 | 444760 | CSAR_peak_0 | 12.17,12.13   | - |
| chr1 | 444846 | 444890 | CSAR_peak_0 | 8.39          | - |
| chr1 | 444962 | 445067 | CSAR_peak_0 | 17.82,13.51   | - |
| chr1 | 445446 | 445525 | CSAR_peak_0 | 44.69,17.37   | - |
| chr1 | 445648 | 445814 | CSAR_peak_0 | 14.85,10.02,  | - |
| chr1 | 445844 | 445991 | CSAR_peak_0 | 16.33,16.11,  | - |
| chr1 | 446030 | 446062 | CSAR_peak_0 | 9.58          | - |
| chr1 | 448912 | 448960 | CSAR_peak_0 | 7.27          | - |
| chr1 | 449225 | 449270 | CSAR_peak_0 | 7.27          | - |
| chr1 | 458591 | 458637 | CSAR_peak_0 | 7.27          | - |
| chr1 | 462896 | 462934 | CSAR_peak_0 | 5.86          | - |
| chr1 | 462973 | 463000 | CSAR_peak_0 | 6.21          | - |
| chr1 | 466430 | 466483 | CSAR_peak_0 | 6.21          | - |

|      |        |        |             |                 |   |
|------|--------|--------|-------------|-----------------|---|
| chr1 | 467477 | 467541 | CSAR_peak_1 | 21.94           | - |
| chr1 | 514112 | 514185 | CSAR_peak_1 | 23.03,9.97      | - |
| chr1 | 514742 | 514780 | CSAR_peak_1 | 8.39            | - |
| chr1 | 552909 | 552979 | CSAR_peak_1 | 9.58            | - |
| chr1 | 553212 | 553267 | CSAR_peak_1 | 14.76,12.13     | - |
| chr1 | 553476 | 553517 | CSAR_peak_1 | 6.03            | - |
| chr1 | 553602 | 553678 | CSAR_peak_1 | 13.48,7.27      | - |
| chr1 | 553985 | 554083 | CSAR_peak_1 | 9.58,12.13      | - |
| chr1 | 554311 | 554363 | CSAR_peak_1 | 14.88           | - |
| chr1 | 554465 | 554539 | CSAR_peak_1 | 11.14,12.74,1(- | - |
| chr1 | 554821 | 554864 | CSAR_peak_1 | 6.21            | - |
| chr1 | 555095 | 555131 | CSAR_peak_1 | 7.27            | - |
| chr1 | 555273 | 555315 | CSAR_peak_1 | 6.21            | - |
| chr1 | 555582 | 555666 | CSAR_peak_1 | 7.92,12.13      | - |
| chr1 | 555746 | 555949 | CSAR_peak_1 | 18.85,26.97,(-  | - |
| chr1 | 571936 | 572108 | CSAR_peak_1 | 17.51,10.02,(-  | - |
| chr1 | 572240 | 572568 | CSAR_peak_1 | 29.4,35.51,2(-  | - |
| chr1 | 572606 | 573023 | CSAR_peak_1 | 27.17,63.81,(-  | - |
| chr1 | 573026 | 573712 | CSAR_peak_1 | 12.13,103.44-   | - |
| chr1 | 573739 | 573797 | CSAR_peak_1 | 25.34,22.69     | - |
| chr1 | 573845 | 574098 | CSAR_peak_1 | 37.06,38.71,(-  | - |
| chr1 | 574113 | 574281 | CSAR_peak_1 | 33.47,46.67     | - |
| chr1 | 574315 | 574382 | CSAR_peak_1 | 20.92,9.61      | - |
| chr1 | 574389 | 574456 | CSAR_peak_1 | 21.59,7.23,2!-  | - |
| chr1 | 574478 | 574603 | CSAR_peak_1 | 21,12.06        | - |
| chr1 | 574620 | 574769 | CSAR_peak_1 | 20.35,13.92     | - |
| chr1 | 608255 | 608354 | CSAR_peak_1 | 7.73,20.94,1(-  | - |
| chr1 | 608592 | 608641 | CSAR_peak_1 | 11.96           | - |
| chr1 | 608676 | 608686 | CSAR_peak_1 | 7.58            | - |
| chr1 | 608804 | 608858 | CSAR_peak_1 | 10.12,11.28     | - |
| chr1 | 608905 | 609019 | CSAR_peak_1 | 6.21,6.81,7.2-  | - |
| chr1 | 643877 | 643966 | CSAR_peak_1 | 14.63,13.48     | - |
| chr1 | 645381 | 645423 | CSAR_peak_1 | 9.58            | - |
| chr1 | 645582 | 645686 | CSAR_peak_1 | 20.05,6.64      | - |
| chr1 | 645755 | 645837 | CSAR_peak_1 | 10.83,27.64,(-  | - |
| chr1 | 645899 | 645958 | CSAR_peak_1 | 8.5,19.15       | - |
| chr1 | 645988 | 646038 | CSAR_peak_1 | 6.94,12.74      | - |
| chr1 | 646126 | 646272 | CSAR_peak_1 | 9.03,12.27      | - |
| chr1 | 646452 | 646490 | CSAR_peak_1 | 6.03            | - |
| chr1 | 646567 | 646576 | CSAR_peak_1 | 9.77            | - |
| chr1 | 646582 | 646688 | CSAR_peak_1 | 21.94,11.63     | - |
| chr1 | 646790 | 646957 | CSAR_peak_1 | 8.65,8.09       | - |

|      |        |                    |                |
|------|--------|--------------------|----------------|
| chr1 | 647038 | 647108 CSAR_peak_1 | 14.88,12.13,-  |
| chr1 | 647121 | 647247 CSAR_peak_1 | 22.56,10.95 -  |
| chr1 | 647531 | 647644 CSAR_peak_1 | 6.21,14.76 -   |
| chr1 | 647703 | 647735 CSAR_peak_1 | 13.48 -        |
| chr1 | 647761 | 647823 CSAR_peak_1 | 13.32,18.9 -   |
| chr1 | 647924 | 648005 CSAR_peak_1 | 16.87,14.63 -  |
| chr1 | 648092 | 648207 CSAR_peak_1 | 24.52,14.85 -  |
| chr1 | 648362 | 648399 CSAR_peak_1 | 10.83 -        |
| chr1 | 648804 | 648830 CSAR_peak_1 | 7.58 -         |
| chr1 | 648911 | 648920 CSAR_peak_1 | 8.65,7.27 -    |
| chr1 | 648925 | 649038 CSAR_peak_1 | 18.1,9.27 -    |
| chr1 | 649039 | 649121 CSAR_peak_1 | 33.03,17.82 -  |
| chr1 | 649128 | 649161 CSAR_peak_1 | 6.57 -         |
| chr1 | 649251 | 649296 CSAR_peak_1 | 7.27 -         |
| chr1 | 649368 | 649469 CSAR_peak_1 | 9.61,12.13 -   |
| chr1 | 649867 | 649890 CSAR_peak_1 | 7.27 -         |
| chr1 | 650791 | 650877 CSAR_peak_1 | 12.74,10.83 -  |
| chr1 | 651166 | 651212 CSAR_peak_1 | 7.27 -         |
| chr1 | 651320 | 651397 CSAR_peak_1 | 25.08,19.98 -  |
| chr1 | 651497 | 651540 CSAR_peak_1 | 13.51 -        |
| chr1 | 651711 | 651735 CSAR_peak_1 | 13.48 -        |
| chr1 | 651757 | 651821 CSAR_peak_1 | 17.35 -        |
| chr1 | 651841 | 651853 CSAR_peak_1 | 6.21 -         |
| chr1 | 654151 | 654201 CSAR_peak_1 | 8.95 -         |
| chr1 | 655634 | 655682 CSAR_peak_1 | 6.21 -         |
| chr1 | 655746 | 655792 CSAR_peak_1 | 8.39 -         |
| chr1 | 655805 | 655824 CSAR_peak_1 | 7.34 -         |
| chr1 | 655933 | 656030 CSAR_peak_1 | 13.48,5.86,9.- |
| chr1 | 656134 | 656196 CSAR_peak_1 | 8.14,10.82,6.- |
| chr1 | 656435 | 656502 CSAR_peak_1 | 7.27 -         |
| chr1 | 656613 | 656634 CSAR_peak_1 | 6.21 -         |
| chr1 | 656738 | 656755 CSAR_peak_1 | 6.21 -         |
| chr1 | 657048 | 657069 CSAR_peak_1 | 8.13 -         |
| chr1 | 657142 | 657181 CSAR_peak_1 | 7.27 -         |
| chr1 | 662042 | 662127 CSAR_peak_1 | 6.21 -         |
| chr1 | 667151 | 667182 CSAR_peak_1 | 5.86 -         |
| chr1 | 667541 | 667602 CSAR_peak_1 | 7.34 -         |
| chr1 | 667957 | 667996 CSAR_peak_1 | 9.58 -         |
| chr1 | 684736 | 684778 CSAR_peak_1 | 10.83 -        |
| chr1 | 688281 | 688348 CSAR_peak_1 | 14.88,6.21 -   |
| chr1 | 689545 | 689611 CSAR_peak_1 | 9.58,9.58 -    |
| chr1 | 703982 | 704046 CSAR_peak_1 | 6.21 -         |

|      |        |        |             |               |   |
|------|--------|--------|-------------|---------------|---|
| chr1 | 704116 | 704166 | CSAR_peak_1 | 7.27          | - |
| chr1 | 705315 | 705368 | CSAR_peak_1 | 7.29          | - |
| chr1 | 705534 | 705582 | CSAR_peak_1 | 6.21          | - |
| chr1 | 713191 | 713309 | CSAR_peak_1 | 9.58          | - |
| chr1 | 713798 | 713855 | CSAR_peak_1 | 7.27          | - |
| chr1 | 714317 | 714412 | CSAR_peak_1 | 7.27,20.94    | - |
| chr1 | 714828 | 714867 | CSAR_peak_1 | 9.58          | - |
| chr1 | 716901 | 716966 | CSAR_peak_1 | 12.17         | - |
| chr1 | 720465 | 720545 | CSAR_peak_1 | 7.27          | - |
| chr1 | 724087 | 724120 | CSAR_peak_1 | 6.21,6.57     | - |
| chr1 | 724275 | 724366 | CSAR_peak_1 | 14.88,16.33   | - |
| chr1 | 724681 | 724747 | CSAR_peak_1 | 7.27          | - |
| chr1 | 725255 | 725305 | CSAR_peak_1 | 5.86          | - |
| chr1 | 726037 | 726123 | CSAR_peak_1 | 14.88,16.11   | - |
| chr1 | 731975 | 732100 | CSAR_peak_1 | 7.92,6.81,9.5 | - |
| chr1 | 732169 | 732210 | CSAR_peak_1 | 8.95          | - |
| chr1 | 732928 | 732979 | CSAR_peak_1 | 14.88         | - |
| chr1 | 733239 | 733423 | CSAR_peak_1 | 13.48,9.58,6. | - |
| chr1 | 733700 | 733788 | CSAR_peak_1 | 9.58,7.27     | - |
| chr1 | 733839 | 733933 | CSAR_peak_1 | 8.39          | - |
| chr1 | 734215 | 734317 | CSAR_peak_1 | 7.27,6.03     | - |
| chr1 | 734612 | 734718 | CSAR_peak_1 | 10.83,17.82   | - |
| chr1 | 734744 | 734822 | CSAR_peak_1 | 6.44,24.21    | - |
| chr1 | 735189 | 735249 | CSAR_peak_1 | 14.88         | - |
| chr1 | 735389 | 735438 | CSAR_peak_1 | 7.27          | - |
| chr1 | 735688 | 735804 | CSAR_peak_1 | 12.31,14.88,  | - |
| chr1 | 735966 | 736009 | CSAR_peak_1 | 7.27          | - |
| chr1 | 736987 | 737028 | CSAR_peak_1 | 6.95          | - |
| chr1 | 737233 | 737438 | CSAR_peak_1 | 14.59,13.48   | - |
| chr1 | 737885 | 737932 | CSAR_peak_1 | 9.77          | - |
| chr1 | 753061 | 753152 | CSAR_peak_1 | 9.58,14.88    | - |
| chr1 | 753570 | 753671 | CSAR_peak_1 | 6.21,18.65,1. | - |
| chr1 | 753724 | 753799 | CSAR_peak_1 | 12.17,9.72    | - |
| chr1 | 753813 | 753884 | CSAR_peak_1 | 7.92,9.61     | - |
| chr1 | 793647 | 793726 | CSAR_peak_1 | 6.21,14.88,1. | - |
| chr1 | 793912 | 793942 | CSAR_peak_1 | 7.27          | - |
| chr1 | 794019 | 794113 | CSAR_peak_1 | 16.05,7.34    | - |
| chr1 | 794573 | 794651 | CSAR_peak_1 | 12.13,9.77    | - |
| chr1 | 794899 | 794964 | CSAR_peak_1 | 6.21          | - |
| chr1 | 795108 | 795160 | CSAR_peak_1 | 9.58          | - |
| chr1 | 846389 | 846427 | CSAR_peak_1 | 7.27          | - |
| chr1 | 869201 | 869248 | CSAR_peak_1 | 7.27          | - |

|      |        |        |             |               |   |
|------|--------|--------|-------------|---------------|---|
| chr1 | 869290 | 869349 | CSAR_peak_1 | 31.2          | - |
| chr1 | 869357 | 869423 | CSAR_peak_1 | 8.14,5.86     | - |
| chr1 | 869491 | 869553 | CSAR_peak_1 | 11.96,12.59   | - |
| chr1 | 869658 | 869779 | CSAR_peak_1 | 17.68,7.27    | - |
| chr1 | 870365 | 870427 | CSAR_peak_1 | 17.82         | - |
| chr1 | 870640 | 870691 | CSAR_peak_1 | 9.58          | - |
| chr1 | 875055 | 875178 | CSAR_peak_1 | 7.31,192.13,  | - |
| chr1 | 875220 | 875265 | CSAR_peak_1 | 15.15,13.61   | - |
| chr1 | 875299 | 875342 | CSAR_peak_1 | 8.13,16.52,9. | - |
| chr1 | 875514 | 875606 | CSAR_peak_1 | 63.28,34.55,  | - |
| chr1 | 878002 | 878101 | CSAR_peak_1 | 8.65          | - |
| chr1 | 878647 | 878656 | CSAR_peak_1 | 6.21          | - |
| chr1 | 878735 | 878811 | CSAR_peak_1 | 24.21,10.83   | - |
| chr1 | 879178 | 879232 | CSAR_peak_1 | 7.27          | - |
| chr1 | 879531 | 879582 | CSAR_peak_1 | 7.27          | - |
| chr1 | 886060 | 886101 | CSAR_peak_1 | 7.27          | - |
| chr1 | 886696 | 886754 | CSAR_peak_1 | 12.13         | - |
| chr1 | 886879 | 886941 | CSAR_peak_1 | 9.58,24.21    | - |
| chr1 | 887015 | 887061 | CSAR_peak_1 | 18.65,12.13   | - |
| chr1 | 887225 | 887259 | CSAR_peak_1 | 13.44         | - |
| chr1 | 887368 | 887431 | CSAR_peak_1 | 24.21,6.45    | - |
| chr1 | 887531 | 887558 | CSAR_peak_1 | 7.26          | - |
| chr1 | 887758 | 887840 | CSAR_peak_1 | 8.39,6.21     | - |
| chr1 | 888420 | 888528 | CSAR_peak_1 | 8.39          | - |
| chr1 | 894544 | 894648 | CSAR_peak_1 | 9.58          | - |
| chr1 | 894676 | 894747 | CSAR_peak_1 | 9.58,9.58     | - |
| chr1 | 894819 | 894883 | CSAR_peak_1 | 9.58          | - |
| chr1 | 895430 | 895473 | CSAR_peak_1 | 10.83         | - |
| chr1 | 895918 | 895922 | CSAR_peak_1 | 7.27          | - |
| chr1 | 914804 | 914853 | CSAR_peak_1 | 6.21          | - |
| chr1 | 914991 | 915051 | CSAR_peak_1 | 7.27          | - |
| chr1 | 917640 | 917699 | CSAR_peak_1 | 21.35,31.2    | - |
| chr1 | 937205 | 937290 | CSAR_peak_1 | 13.3,96.94,1: | - |
| chr1 | 937401 | 937489 | CSAR_peak_1 | 15.68,16.89,  | - |
| chr1 | 977396 | 977486 | CSAR_peak_1 | 6.57          | - |
| chr1 | 977501 | 977537 | CSAR_peak_1 | 10.83         | - |
| chr1 | 977624 | 977673 | CSAR_peak_1 | 12.13         | - |
| chr1 | 980786 | 980839 | CSAR_peak_1 | 6.21          | - |
| chr1 | 982530 | 982560 | CSAR_peak_1 | 6.21          | - |
| chr1 | 982656 | 982733 | CSAR_peak_1 | 42.59,35.83   | - |
| chr1 | 982794 | 982848 | CSAR_peak_1 | 9.58          | - |
| chr1 | 982944 | 983003 | CSAR_peak_1 | 9.58          | - |

|      |         |         |            |              |     |
|------|---------|---------|------------|--------------|-----|
| chr1 | 1025064 | 1025103 | CSAR_peak_ | 7.27         | -   |
| chr1 | 1025293 | 1025337 | CSAR_peak_ | 6.21         | -   |
| chr1 | 1026257 | 1026330 | CSAR_peak_ | 9.58         | -   |
| chr1 | 1032125 | 1032164 | CSAR_peak_ | 7.27         | -   |
| chr1 | 1043098 | 1043164 | CSAR_peak_ | 6.95         | -   |
| chr1 | 1065107 | 1065167 | CSAR_peak_ | 12.13        | -   |
| chr1 | 1065202 | 1065316 | CSAR_peak_ | 13.48,11.14, | (-  |
| chr1 | 1065387 | 1065438 | CSAR_peak_ | 12.13        | -   |
| chr1 | 1065731 | 1065834 | CSAR_peak_ | 13.48,6.81   | -   |
| chr1 | 1065836 | 1065856 | CSAR_peak_ | 9.58         | -   |
| chr1 | 1065935 | 1066054 | CSAR_peak_ | 9.48,19.36,  | 7.- |
| chr1 | 1067807 | 1067850 | CSAR_peak_ | 8.39         | -   |
| chr1 | 1067927 | 1067958 | CSAR_peak_ | 8.39         | -   |
| chr1 | 1068177 | 1068248 | CSAR_peak_ | 12.17,14.88  | -   |
| chr1 | 1068357 | 1068373 | CSAR_peak_ | 12.13        | -   |
| chr1 | 1068409 | 1068431 | CSAR_peak_ | 6.21         | -   |
| chr1 | 1068500 | 1068557 | CSAR_peak_ | 8.39         | -   |
| chr1 | 1068853 | 1068888 | CSAR_peak_ | 5.86         | -   |
| chr1 | 1069531 | 1069581 | CSAR_peak_ | 6.21         | -   |
| chr1 | 1075450 | 1075528 | CSAR_peak_ | 6.21         | -   |
| chr1 | 1075992 | 1076011 | CSAR_peak_ | 6.57,6.21    | -   |
| chr1 | 1076112 | 1076209 | CSAR_peak_ | 9.58,7.27    | -   |
| chr1 | 1076601 | 1076660 | CSAR_peak_ | 12.13        | -   |
| chr1 | 1078489 | 1078553 | CSAR_peak_ | 7.27,6.21    | -   |
| chr1 | 1078838 | 1078900 | CSAR_peak_ | 12.13,9.77   | -   |
| chr1 | 1079247 | 1079322 | CSAR_peak_ | 33.47,9.03   | -   |
| chr1 | 1079743 | 1079786 | CSAR_peak_ | 7.27         | -   |
| chr1 | 1119968 | 1120022 | CSAR_peak_ | 9.58         | -   |
| chr1 | 1120151 | 1120194 | CSAR_peak_ | 7.27         | -   |
| chr1 | 1120447 | 1120505 | CSAR_peak_ | 10.94,12.13  | -   |
| chr1 | 1120614 | 1120663 | CSAR_peak_ | 9.58         | -   |
| chr1 | 1121789 | 1121947 | CSAR_peak_ | 8.39,10.83   | -   |
| chr1 | 1128589 | 1128640 | CSAR_peak_ | 14.88        | -   |
| chr1 | 1129240 | 1129311 | CSAR_peak_ | 11.38        | -   |
| chr1 | 1141773 | 1141827 | CSAR_peak_ | 9.58         | -   |
| chr1 | 1141981 | 1142101 | CSAR_peak_ | 12.13,17.82  | -   |
| chr1 | 1142576 | 1142634 | CSAR_peak_ | 12.5         | -   |
| chr1 | 1142822 | 1142887 | CSAR_peak_ | 7.58         | -   |
| chr1 | 1144277 | 1144316 | CSAR_peak_ | 8.39         | -   |
| chr1 | 1144478 | 1144549 | CSAR_peak_ | 6.21         | -   |
| chr1 | 1144765 | 1144796 | CSAR_peak_ | 7            | -   |
| chr1 | 1144876 | 1144911 | CSAR_peak_ | 8.39         | -   |

|      |         |         |             |                |   |
|------|---------|---------|-------------|----------------|---|
| chr1 | 1145295 | 1145357 | CSAR_peak_1 | 10.95          | - |
| chr1 | 1148916 | 1149016 | CSAR_peak_1 | 10.95,20.43    | - |
| chr1 | 1149810 | 1149892 | CSAR_peak_1 | 20.94,7.27     | - |
| chr1 | 1150167 | 1150225 | CSAR_peak_1 | 8.65,8.39      | - |
| chr1 | 1150249 | 1150349 | CSAR_peak_1 | 10.31,16.08    | - |
| chr1 | 1150392 | 1150462 | CSAR_peak_1 | 7.27           | - |
| chr1 | 1150600 | 1150822 | CSAR_peak_1 | 12.13,16.33,;- | - |
| chr1 | 1150861 | 1150883 | CSAR_peak_1 | 8.61           | - |
| chr1 | 1150968 | 1151035 | CSAR_peak_1 | 6.72,11.32     | - |
| chr1 | 1151062 | 1151119 | CSAR_peak_1 | 30.02,12.31    | - |
| chr1 | 1151212 | 1151338 | CSAR_peak_1 | 13.48,7.27,6.- | - |
| chr1 | 1151503 | 1151732 | CSAR_peak_1 | 18.65,31.73    | - |
| chr1 | 1151757 | 1151785 | CSAR_peak_1 | 7.58           | - |
| chr1 | 1151810 | 1151867 | CSAR_peak_1 | 24.21          | - |
| chr1 | 1152311 | 1152377 | CSAR_peak_1 | 11.03,7.34     | - |
| chr1 | 1152378 | 1152458 | CSAR_peak_1 | 9.77           | - |
| chr1 | 1152651 | 1152747 | CSAR_peak_1 | 6.81,9.27,8.9- | - |
| chr1 | 1152795 | 1152810 | CSAR_peak_1 | 7.13           | - |
| chr1 | 1152879 | 1152929 | CSAR_peak_1 | 6.95,10.31     | - |
| chr1 | 1153216 | 1153346 | CSAR_peak_1 | 25.91,21.68    | - |
| chr1 | 1153718 | 1153927 | CSAR_peak_1 | 18.55,11.14    | - |
| chr1 | 1155020 | 1155070 | CSAR_peak_1 | 10.83          | - |
| chr1 | 1155490 | 1155539 | CSAR_peak_1 | 7.27,6.21      | - |
| chr1 | 1179963 | 1180017 | CSAR_peak_1 | 7.27           | - |
| chr1 | 1185778 | 1185839 | CSAR_peak_1 | 13.48          | - |
| chr1 | 1185853 | 1185902 | CSAR_peak_1 | 7.27           | - |
| chr1 | 1185916 | 1185983 | CSAR_peak_1 | 14.85          | - |
| chr1 | 1186030 | 1186203 | CSAR_peak_1 | 20.54,26.64    | - |
| chr1 | 1186207 | 1186254 | CSAR_peak_1 | 7.27           | - |
| chr1 | 1186290 | 1186371 | CSAR_peak_1 | 10.83,14.88    | - |
| chr1 | 1186409 | 1186584 | CSAR_peak_1 | 30.53,13.48,;- | - |
| chr1 | 1186603 | 1186747 | CSAR_peak_1 | 17.82,6.71,14- | - |
| chr1 | 1186805 | 1186941 | CSAR_peak_1 | 23.49,10.83    | - |
| chr1 | 1186974 | 1187233 | CSAR_peak_1 | 42.64,26.92,;- | - |
| chr1 | 1187260 | 1187563 | CSAR_peak_1 | 19.36,25.62,;- | - |
| chr1 | 1187589 | 1187693 | CSAR_peak_1 | 18.73,19.48    | - |
| chr1 | 1187719 | 1187764 | CSAR_peak_1 | 7.27           | - |
| chr1 | 1187813 | 1187909 | CSAR_peak_1 | 9.61           | - |
| chr1 | 1187933 | 1188071 | CSAR_peak_1 | 27.64,21.24,;- | - |
| chr1 | 1188174 | 1188300 | CSAR_peak_1 | 45.5,49.99     | - |
| chr1 | 1188419 | 1188516 | CSAR_peak_1 | 14.88,13.44    | - |
| chr1 | 1188827 | 1188900 | CSAR_peak_1 | 24.21,9.58     | - |



|      |         |         |                           |         |
|------|---------|---------|---------------------------|---------|
| chr1 | 1189193 | 1189259 | CSAR_peak_(9.77,9.58      | -       |
| chr1 | 1189295 | 1189410 | CSAR_peak_(               | 7.27 -  |
| chr1 | 1189421 | 1189446 | CSAR_peak_(               | 6.44 -  |
| chr1 | 1189476 | 1189649 | CSAR_peak_(44.44,8.14,6.- |         |
| chr1 | 1189684 | 1189732 | CSAR_peak_(13.92,12.13    | -       |
| chr1 | 1189768 | 1190107 | CSAR_peak_(33.12,13.69,;- |         |
| chr1 | 1190129 | 1190188 | CSAR_peak_(               | 12.28 - |
| chr1 | 1190227 | 1190314 | CSAR_peak_(8.39,9.77      | -       |
| chr1 | 1190323 | 1190374 | CSAR_peak_(8.14,5.86      | -       |
| chr1 | 1190465 | 1190527 | CSAR_peak_(6.94,24.21     | -       |
| chr1 | 1190617 | 1190879 | CSAR_peak_(28.21,21.35,;- |         |
| chr1 | 1190881 | 1191018 | CSAR_peak_(16.34,7.27,2(- |         |
| chr1 | 1191176 | 1191327 | CSAR_peak_(36.98,25.5     | -       |
| chr1 | 1215721 | 1215836 | CSAR_peak_(13.42,103.8,;- |         |
| chr1 | 1235014 | 1235057 | CSAR_peak_(               | 5.86 -  |
| chr1 | 1305372 | 1305466 | CSAR_peak_(14.88,14.88    | -       |
| chr1 | 1306792 | 1306873 | CSAR_peak_(13.44,12.13    | -       |
| chr1 | 1331948 | 1332001 | CSAR_peak_(16.33,7.58     | -       |
| chr1 | 1332137 | 1332200 | CSAR_peak_(8.28,7.27      | -       |
| chr1 | 1332401 | 1332427 | CSAR_peak_(               | 5.86 -  |
| chr1 | 1332429 | 1332486 | CSAR_peak_(               | 7.27 -  |
| chr1 | 1332595 | 1332645 | CSAR_peak_(               | 7.34 -  |
| chr1 | 1333367 | 1333433 | CSAR_peak_(               | 7.27 -  |
| chr1 | 1337524 | 1337566 | CSAR_peak_(               | 9.77 -  |
| chr1 | 1341592 | 1341651 | CSAR_peak_(               | 8.39 -  |
| chr1 | 1341775 | 1341847 | CSAR_peak_(               | 13.48 - |
| chr1 | 1341930 | 1341975 | CSAR_peak_(               | 7.58 -  |
| chr1 | 1348859 | 1348918 | CSAR_peak_(               | 10.83 - |
| chr1 | 1358174 | 1358251 | CSAR_peak_(7.27,10.83     | -       |
| chr1 | 1359725 | 1359769 | CSAR_peak_(               | 7.27 -  |
| chr1 | 1360491 | 1360549 | CSAR_peak_(14.76,13.44    | -       |
| chr1 | 1360680 | 1360765 | CSAR_peak_(               | 10.02 - |
| chr1 | 1361119 | 1361180 | CSAR_peak_(12.13,8.39     | -       |
| chr1 | 1361318 | 1361352 | CSAR_peak_(8.39,12.13     | -       |
| chr1 | 1363259 | 1363341 | CSAR_peak_(               | 6.21 -  |
| chr1 | 1363960 | 1364010 | CSAR_peak_(               | 9.58 -  |
| chr1 | 1365623 | 1365700 | CSAR_peak_(               | 8.39 -  |
| chr1 | 1365875 | 1365951 | CSAR_peak_(14.92,16.11    | -       |
| chr1 | 1366060 | 1366129 | CSAR_peak_(14.88,6.03,1(- |         |
| chr1 | 1366218 | 1366260 | CSAR_peak_(               | 7.27 -  |
| chr1 | 1366391 | 1366470 | CSAR_peak_(13.48,7        | -       |
| chr1 | 1366591 | 1366679 | CSAR_peak_(17.65,9.48     | -       |

|      |         |         |            |                 |
|------|---------|---------|------------|-----------------|
| chr1 | 1366793 | 1366887 | CSAR_peak_ | 6.81,6.21,9.5-  |
| chr1 | 1367147 | 1367224 | CSAR_peak_ | 26.69 -         |
| chr1 | 1367624 | 1367682 | CSAR_peak_ | 7.27 -          |
| chr1 | 1367852 | 1367944 | CSAR_peak_ | 9.58,25.91 -    |
| chr1 | 1369486 | 1369547 | CSAR_peak_ | 10.83 -         |
| chr1 | 1369646 | 1369669 | CSAR_peak_ | 7.27 -          |
| chr1 | 1369985 | 1370127 | CSAR_peak_ | 10.83,19.36 -   |
| chr1 | 1388202 | 1388248 | CSAR_peak_ | 6.21 -          |
| chr1 | 1388297 | 1388339 | CSAR_peak_ | 7.27 -          |
| chr1 | 1388635 | 1388716 | CSAR_peak_ | 10.83,14.88 -   |
| chr1 | 1388881 | 1388956 | CSAR_peak_ | 23.03,14,15.:-  |
| chr1 | 1390015 | 1390067 | CSAR_peak_ | 8.39 -          |
| chr1 | 1390781 | 1390824 | CSAR_peak_ | 7.27 -          |
| chr1 | 1405964 | 1406004 | CSAR_peak_ | 6.21 -          |
| chr1 | 1408141 | 1408215 | CSAR_peak_ | 10.02 -         |
| chr1 | 1409360 | 1409417 | CSAR_peak_ | 5.86 -          |
| chr1 | 1410702 | 1410761 | CSAR_peak_ | 7.27 -          |
| chr1 | 1416562 | 1416616 | CSAR_peak_ | 14.88 -         |
| chr1 | 1416963 | 1416979 | CSAR_peak_ | 11.38 -         |
| chr1 | 1417326 | 1417368 | CSAR_peak_ | 7.26 -          |
| chr1 | 1418031 | 1418052 | CSAR_peak_ | 7.27 -          |
| chr1 | 1420537 | 1420586 | CSAR_peak_ | 7.27 -          |
| chr1 | 1420825 | 1420882 | CSAR_peak_ | 7.27 -          |
| chr1 | 1431395 | 1431497 | CSAR_peak_ | 16.33,6.03 -    |
| chr1 | 1431499 | 1431608 | CSAR_peak_ | 20.18,30.21 -   |
| chr1 | 1431633 | 1431646 | CSAR_peak_ | 8.28 -          |
| chr1 | 1431664 | 1431911 | CSAR_peak_ | 26.64,6.03,1:-  |
| chr1 | 1431925 | 1432034 | CSAR_peak_ | 9.58,19.36 -    |
| chr1 | 1432037 | 1432167 | CSAR_peak_ | 29.69,13.09 -   |
| chr1 | 1432285 | 1432545 | CSAR_peak_ | 25.91,30.81,4:- |
| chr1 | 1432586 | 1432744 | CSAR_peak_ | 19.26,12.74 -   |
| chr1 | 1450744 | 1450794 | CSAR_peak_ | 7 -             |
| chr1 | 1457442 | 1457500 | CSAR_peak_ | 6.21 -          |
| chr1 | 1471835 | 1471861 | CSAR_peak_ | 7.27,6.03 -     |
| chr1 | 1471948 | 1472027 | CSAR_peak_ | 26.05,8.2,8.2-  |
| chr1 | 1472684 | 1472747 | CSAR_peak_ | 8.39 -          |
| chr1 | 1473014 | 1473054 | CSAR_peak_ | 6.21 -          |
| chr1 | 1476034 | 1476089 | CSAR_peak_ | 6.21 -          |
| chr1 | 1477762 | 1478675 | CSAR_peak_ | 15.2,21.16,14-  |
| chr1 | 1478712 | 1478755 | CSAR_peak_ | 8.9 -           |
| chr1 | 1478764 | 1478834 | CSAR_peak_ | 18.65,8.65 -    |
| chr1 | 1486410 | 1486472 | CSAR_peak_ | 8.39 -          |

|      |         |         |            |               |   |
|------|---------|---------|------------|---------------|---|
| chr1 | 1488116 | 1488126 | CSAR_peak_ | 5.86          | - |
| chr1 | 1488220 | 1488253 | CSAR_peak_ | 5.86          | - |
| chr1 | 1498900 | 1498920 | CSAR_peak_ | 7.27          | - |
| chr1 | 1499229 | 1499315 | CSAR_peak_ | 11.14,8.39    | - |
| chr1 | 1499456 | 1499481 | CSAR_peak_ | 7.27          | - |
| chr1 | 1501697 | 1501785 | CSAR_peak_ | 8.39          | - |
| chr1 | 1532053 | 1532100 | CSAR_peak_ | 6.45          | - |
| chr1 | 1532303 | 1532365 | CSAR_peak_ | 9.41,7.78     | - |
| chr1 | 1532484 | 1532549 | CSAR_peak_ | 20.13,19.36   | - |
| chr1 | 1532570 | 1532598 | CSAR_peak_ | 6.21          | - |
| chr1 | 1533961 | 1534134 | CSAR_peak_ | 8.95,10.31,9. | - |
| chr1 | 1558067 | 1558144 | CSAR_peak_ | 14.88         | - |
| chr1 | 1558366 | 1558597 | CSAR_peak_ | 24.21,22.56,  | - |
| chr1 | 1558840 | 1558870 | CSAR_peak_ | 7.58          | - |
| chr1 | 1559008 | 1559166 | CSAR_peak_ | 16.19,21.22   | - |
| chr1 | 1559354 | 1559446 | CSAR_peak_ | 27.34,14,7.3  | - |
| chr1 | 1559476 | 1559543 | CSAR_peak_ | 13.92,17.28   | - |
| chr1 | 1559616 | 1559685 | CSAR_peak_ | 30.8,43.11    | - |
| chr1 | 1631581 | 1631624 | CSAR_peak_ | 7.27          | - |
| chr1 | 1632026 | 1632046 | CSAR_peak_ | 7.27          | - |
| chr1 | 1632350 | 1632403 | CSAR_peak_ | 9.58          | - |
| chr1 | 1633934 | 1634004 | CSAR_peak_ | 12.13,6.03    | - |
| chr1 | 1634525 | 1634574 | CSAR_peak_ | 7.27          | - |
| chr1 | 1634609 | 1634646 | CSAR_peak_ | 7.27          | - |
| chr1 | 1634918 | 1634965 | CSAR_peak_ | 12.13         | - |
| chr1 | 1635021 | 1635076 | CSAR_peak_ | 9.58          | - |
| chr1 | 1648019 | 1648129 | CSAR_peak_ | 8.65,14.08    | - |
| chr1 | 1648725 | 1648784 | CSAR_peak_ | 16.33         | - |
| chr1 | 1648792 | 1648882 | CSAR_peak_ | 10.83,8.39    | - |
| chr1 | 1649078 | 1649171 | CSAR_peak_ | 6.85,18.65,6. | - |
| chr1 | 1649206 | 1649275 | CSAR_peak_ | 11.63         | - |
| chr1 | 1649600 | 1649646 | CSAR_peak_ | 6.21          | - |
| chr1 | 1650048 | 1650101 | CSAR_peak_ | 7.26          | - |
| chr1 | 1650216 | 1650283 | CSAR_peak_ | 19.36         | - |
| chr1 | 1650295 | 1650369 | CSAR_peak_ | 9.58,8.28     | - |
| chr1 | 1650449 | 1650577 | CSAR_peak_ | 23.95,9.03    | - |
| chr1 | 1650816 | 1650888 | CSAR_peak_ | 17.82,6.44    | - |
| chr1 | 1650982 | 1651095 | CSAR_peak_ | 13.66,16.22,  | - |
| chr1 | 1651129 | 1651172 | CSAR_peak_ | 6.87,13.51    | - |
| chr1 | 1651256 | 1651371 | CSAR_peak_ | 6.71,8.65     | - |
| chr1 | 1651437 | 1651467 | CSAR_peak_ | 16.33,7.58    | - |
| chr1 | 1651508 | 1651590 | CSAR_peak_ | 19.21,13.85   | - |

|      |         |         |            |                |   |
|------|---------|---------|------------|----------------|---|
| chr1 | 1651648 | 1651670 | CSAR_peak_ | 6.03           | - |
| chr1 | 1651835 | 1651885 | CSAR_peak_ | 8.39           | - |
| chr1 | 1652329 | 1652460 | CSAR_peak_ | 28.34,11.14,   | - |
| chr1 | 1652514 | 1652556 | CSAR_peak_ | 14.88          | - |
| chr1 | 1652601 | 1652638 | CSAR_peak_ | 9.58,10.13     | - |
| chr1 | 1652713 | 1652768 | CSAR_peak_ | 24.21,25.07    | - |
| chr1 | 1652791 | 1652870 | CSAR_peak_ | 10.83,12.35    | - |
| chr1 | 1653026 | 1653052 | CSAR_peak_ | 12.31          | - |
| chr1 | 1653652 | 1653719 | CSAR_peak_ | 8.65           | - |
| chr1 | 1653802 | 1653909 | CSAR_peak_ | 16.25,7.27,3(- | - |
| chr1 | 1654029 | 1654157 | CSAR_peak_ | 6.57,8.65,14.- | - |
| chr1 | 1654282 | 1654351 | CSAR_peak_ | 8.95           | - |
| chr1 | 1654451 | 1654501 | CSAR_peak_ | 12.5           | - |
| chr1 | 1654832 | 1654915 | CSAR_peak_ | 12.17,12.31    | - |
| chr1 | 1655120 | 1655184 | CSAR_peak_ | 6.03,7.27      | - |
| chr1 | 1655361 | 1655417 | CSAR_peak_ | 7.27,14.88     | - |
| chr1 | 1655689 | 1655749 | CSAR_peak_ | 20.43,17.37    | - |
| chr1 | 1655830 | 1655884 | CSAR_peak_ | 17.51,14.76    | - |
| chr1 | 1655940 | 1655950 | CSAR_peak_ | 6.42           | - |
| chr1 | 1656156 | 1656295 | CSAR_peak_ | 17.52,7.27,6.- | - |
| chr1 | 1656391 | 1656468 | CSAR_peak_ | 23.95,16.33,(- | - |
| chr1 | 1656636 | 1656709 | CSAR_peak_ | 7.27           | - |
| chr1 | 1656813 | 1656922 | CSAR_peak_ | 46.67,9.58,7.- | - |
| chr1 | 1657067 | 1657159 | CSAR_peak_ | 18.35,10.31    | - |
| chr1 | 1657263 | 1657319 | CSAR_peak_ | 8.39           | - |
| chr1 | 1657454 | 1657574 | CSAR_peak_ | 38.71,12.17    | - |
| chr1 | 1657701 | 1657724 | CSAR_peak_ | 6.02           | - |
| chr1 | 1657888 | 1657937 | CSAR_peak_ | 8.52,7.71      | - |
| chr1 | 1658084 | 1658137 | CSAR_peak_ | 12.17          | - |
| chr1 | 1658299 | 1658329 | CSAR_peak_ | 5.86           | - |
| chr1 | 1658348 | 1658409 | CSAR_peak_ | 9.58           | - |
| chr1 | 1658652 | 1658716 | CSAR_peak_ | 21.56,9.58     | - |
| chr1 | 1659291 | 1659350 | CSAR_peak_ | 9.58           | - |
| chr1 | 1698882 | 1698930 | CSAR_peak_ | 7.27           | - |
| chr1 | 1729424 | 1729477 | CSAR_peak_ | 7.27           | - |
| chr1 | 1763349 | 1763413 | CSAR_peak_ | 7.27           | - |
| chr1 | 1764368 | 1764425 | CSAR_peak_ | 16.33          | - |
| chr1 | 1765324 | 1765373 | CSAR_peak_ | 7.27           | - |
| chr1 | 1765666 | 1765757 | CSAR_peak_ | 6.21           | - |
| chr1 | 1766616 | 1766652 | CSAR_peak_ | 10.83          | - |
| chr1 | 1766865 | 1766947 | CSAR_peak_ | 8.92           | - |
| chr1 | 1766979 | 1767113 | CSAR_peak_ | 36.78,12.13    | - |

|      |         |         |            |                 |         |
|------|---------|---------|------------|-----------------|---------|
| chr1 | 1767144 | 1767259 | CSAR_peak_ | 18.35,14.59     | -       |
| chr1 | 1767352 | 1767617 | CSAR_peak_ | (20.79,16.92,)- |         |
| chr1 | 1767719 | 1767808 | CSAR_peak_ | (24.21,14.59    | -       |
| chr1 | 1768029 | 1768132 | CSAR_peak_ | (20.05,26.43    | -       |
| chr1 | 1768441 | 1768494 | CSAR_peak_ |                 | 13.44 - |
| chr1 | 1768548 | 1768646 | CSAR_peak_ |                 | 10.83 - |
| chr1 | 1772403 | 1772445 | CSAR_peak_ |                 | 7.27 -  |
| chr1 | 1801231 | 1801273 | CSAR_peak_ |                 | 6.21 -  |
| chr1 | 1808237 | 1808305 | CSAR_peak_ |                 | 8.39 -  |
| chr1 | 1808745 | 1808788 | CSAR_peak_ |                 | 6.21 -  |
| chr1 | 1808825 | 1808881 | CSAR_peak_ |                 | 7.27 -  |
| chr1 | 1809019 | 1809046 | CSAR_peak_ |                 | 5.86 -  |
| chr1 | 1813217 | 1813289 | CSAR_peak_ |                 | 24.21 - |
| chr1 | 1813927 | 1813972 | CSAR_peak_ |                 | 20.94 - |
| chr1 | 1814471 | 1814563 | CSAR_peak_ |                 | 6.21 -  |
| chr1 | 1814659 | 1814752 | CSAR_peak_ | (12.13,5.86,7.- |         |
| chr1 | 1826812 | 1826868 | CSAR_peak_ |                 | 8.65 -  |
| chr1 | 1828530 | 1828609 | CSAR_peak_ | (7.27,6.21      | -       |
| chr1 | 1828795 | 1828858 | CSAR_peak_ | (9.72,13.84     | -       |
| chr1 | 1828888 | 1829043 | CSAR_peak_ | (24.47,5.86,1:- |         |
| chr1 | 1829120 | 1829195 | CSAR_peak_ | 50.81,30.02     | -       |
| chr1 | 1829217 | 1829413 | CSAR_peak_ | 28.21,6.57,2(-  |         |
| chr1 | 1829454 | 1829505 | CSAR_peak_ | 10.83,19.36,-   |         |
| chr1 | 1858334 | 1858433 | CSAR_peak_ | 17.82,12.13     | -       |
| chr1 | 1858518 | 1858583 | CSAR_peak_ | 18.95,13.48     | -       |
| chr1 | 1859142 | 1859183 | CSAR_peak_ |                 | 7.27 -  |
| chr1 | 1859386 | 1859453 | CSAR_peak_ | 11.03,6.44      | -       |
| chr1 | 1869620 | 1869725 | CSAR_peak_ | (14.88,7.27     | -       |
| chr1 | 1869937 | 1870000 | CSAR_peak_ | (12.13,7.27     | -       |
| chr1 | 1870980 | 1871025 | CSAR_peak_ |                 | 6.21 -  |
| chr1 | 1895052 | 1895136 | CSAR_peak_ | 6.21,7.27       | -       |
| chr1 | 1950943 | 1950989 | CSAR_peak_ | (9.58,6.21      | -       |
| chr1 | 1951042 | 1951203 | CSAR_peak_ | (10.95,6.94,6.- |         |
| chr1 | 1951371 | 1951546 | CSAR_peak_ | (14.92,11.66    | -       |
| chr1 | 1951797 | 1951871 | CSAR_peak_ | 7.27,7.27       | -       |
| chr1 | 1951892 | 1951933 | CSAR_peak_ |                 | 12.13 - |
| chr1 | 1952066 | 1952128 | CSAR_peak_ |                 | 9.58 -  |
| chr1 | 1952131 | 1952187 | CSAR_peak_ |                 | 6.21 -  |
| chr1 | 1952332 | 1952382 | CSAR_peak_ |                 | 6.21 -  |
| chr1 | 1952448 | 1952557 | CSAR_peak_ | 30.53,46.89     | -       |
| chr1 | 1952585 | 1952646 | CSAR_peak_ |                 | 6.21 -  |
| chr1 | 1965824 | 1965885 | CSAR_peak_ |                 | 9.77 -  |

|      |         |         |            |                |   |
|------|---------|---------|------------|----------------|---|
| chr1 | 1966187 | 1966265 | CSAR_peak_ | 16.33          | - |
| chr1 | 1966354 | 1966423 | CSAR_peak_ | 9.58           | - |
| chr1 | 1966449 | 1966511 | CSAR_peak_ | 21.56,12.31    | - |
| chr1 | 1966710 | 1966999 | CSAR_peak_ | 38.35,36.64    | - |
| chr1 | 1967227 | 1967389 | CSAR_peak_ | 33.03          | - |
| chr1 | 1967446 | 1967530 | CSAR_peak_ | 6.21,13.48     | - |
| chr1 | 1967595 | 1967649 | CSAR_peak_ | 7.27,14.88     | - |
| chr1 | 1967660 | 1967726 | CSAR_peak_ | 6.21           | - |
| chr1 | 1967876 | 1968054 | CSAR_peak_ | 15.56,26.92,   | - |
| chr1 | 1968324 | 1968374 | CSAR_peak_ | 12.13          | - |
| chr1 | 1968377 | 1968422 | CSAR_peak_ | 7.58           | - |
| chr1 | 1968520 | 1968649 | CSAR_peak_ | 9.55,12.14,2!  | - |
| chr1 | 1968784 | 1968854 | CSAR_peak_ | 22.56,9.58     | - |
| chr1 | 1969380 | 1969442 | CSAR_peak_ | 16.33          | - |
| chr1 | 2003246 | 2003307 | CSAR_peak_ | 7.27           | - |
| chr1 | 2003988 | 2004021 | CSAR_peak_ | 6.21           | - |
| chr1 | 2004193 | 2004244 | CSAR_peak_ | 9.58           | - |
| chr1 | 2004867 | 2004933 | CSAR_peak_ | 17.82,12.31    | - |
| chr1 | 2005049 | 2005131 | CSAR_peak_ | 8.28,13.51     | - |
| chr1 | 2005386 | 2005489 | CSAR_peak_ | 10.02,12.95    | - |
| chr1 | 2005793 | 2005841 | CSAR_peak_ | 12.17,10.83    | - |
| chr1 | 2006532 | 2006603 | CSAR_peak_ | 14.88          | - |
| chr1 | 2007879 | 2007950 | CSAR_peak_ | 17.82,9.48,9.- | - |
| chr1 | 2007967 | 2008077 | CSAR_peak_ | 12.13          | - |
| chr1 | 2008110 | 2008158 | CSAR_peak_ | 6.21           | - |
| chr1 | 2008167 | 2008213 | CSAR_peak_ | 7.27           | - |
| chr1 | 2008615 | 2008677 | CSAR_peak_ | 7.27           | - |
| chr1 | 2009359 | 2009412 | CSAR_peak_ | 7.27           | - |
| chr1 | 2011014 | 2011065 | CSAR_peak_ | 8.39           | - |
| chr1 | 2011380 | 2011433 | CSAR_peak_ | 6.21           | - |
| chr1 | 2011490 | 2011608 | CSAR_peak_ | 12.13          | - |
| chr1 | 2011746 | 2011879 | CSAR_peak_ | 10.62,16.33    | - |
| chr1 | 2012011 | 2012080 | CSAR_peak_ | 16.33,7.92     | - |
| chr1 | 2012165 | 2012200 | CSAR_peak_ | 9.58,17.37     | - |
| chr1 | 2012297 | 2012437 | CSAR_peak_ | 9.97,9.79      | - |
| chr1 | 2012480 | 2012610 | CSAR_peak_ | 14.88,19.98,   | - |
| chr1 | 2053604 | 2053664 | CSAR_peak_ | 10.31          | - |
| chr1 | 2053786 | 2053842 | CSAR_peak_ | 14.88,12.31    | - |
| chr1 | 2053995 | 2054078 | CSAR_peak_ | 22.56,25.91    | - |
| chr1 | 2054494 | 2054624 | CSAR_peak_ | 16.33,17.82    | - |
| chr1 | 2067183 | 2067246 | CSAR_peak_ | 7.27           | - |
| chr1 | 2077262 | 2077311 | CSAR_peak_ | 7.27           | - |

|      |         |         |            |               |   |
|------|---------|---------|------------|---------------|---|
| chr1 | 2077458 | 2077510 | CSAR_peak_ | 10.31         | - |
| chr1 | 2077512 | 2077570 | CSAR_peak_ | 7.58          | - |
| chr1 | 2094130 | 2094151 | CSAR_peak_ | 9.58          | - |
| chr1 | 2094234 | 2094249 | CSAR_peak_ | 7.27          | - |
| chr1 | 2095952 | 2095993 | CSAR_peak_ | 8.39          | - |
| chr1 | 2097981 | 2098050 | CSAR_peak_ | 7.27          | - |
| chr1 | 2098276 | 2098379 | CSAR_peak_ | 8.39          | - |
| chr1 | 2098489 | 2098623 | CSAR_peak_ | 9.58,7.27,7.5 | - |
| chr1 | 2099828 | 2099927 | CSAR_peak_ | 10.31,12.13   | - |
| chr1 | 2100616 | 2100622 | CSAR_peak_ | 9.61          | - |
| chr1 | 2100730 | 2100783 | CSAR_peak_ | 14.51,7.91    | - |
| chr1 | 2101176 | 2101226 | CSAR_peak_ | 7.27,7.27     | - |
| chr1 | 2101310 | 2101350 | CSAR_peak_ | 6.21          | - |
| chr1 | 2101661 | 2101725 | CSAR_peak_ | 6.21,7.27     | - |
| chr1 | 2102104 | 2102139 | CSAR_peak_ | 6.21          | - |
| chr1 | 2102666 | 2102725 | CSAR_peak_ | 9.58,9.77     | - |
| chr1 | 2107309 | 2107405 | CSAR_peak_ | 73.93,9.68,4  | - |
| chr1 | 2111056 | 2111149 | CSAR_peak_ | 102.63,261.0  | - |
| chr1 | 2113239 | 2113286 | CSAR_peak_ | 10.83         | - |
| chr1 | 2113924 | 2113965 | CSAR_peak_ | 7.27          | - |
| chr1 | 2130231 | 2130286 | CSAR_peak_ | 9.58          | - |
| chr1 | 2131360 | 2131401 | CSAR_peak_ | 12.13         | - |
| chr1 | 2131464 | 2131557 | CSAR_peak_ | 7.27          | - |
| chr1 | 2133091 | 2133139 | CSAR_peak_ | 7.27          | - |
| chr1 | 2133569 | 2133662 | CSAR_peak_ | 20.94,10.83   | - |
| chr1 | 2133751 | 2133817 | CSAR_peak_ | 25.62,9.97    | - |
| chr1 | 2134124 | 2134170 | CSAR_peak_ | 14.88,6.57    | - |
| chr1 | 2134415 | 2134419 | CSAR_peak_ | 7.27          | - |
| chr1 | 2134510 | 2134559 | CSAR_peak_ | 12.31,11.03   | - |
| chr1 | 2134562 | 2134582 | CSAR_peak_ | 10.96         | - |
| chr1 | 2134688 | 2134761 | CSAR_peak_ | 9.58,17.82    | - |
| chr1 | 2135040 | 2135096 | CSAR_peak_ | 12.13         | - |
| chr1 | 2150692 | 2150816 | CSAR_peak_ | 7.92,7.27     | - |
| chr1 | 2155484 | 2155535 | CSAR_peak_ | 5.86          | - |
| chr1 | 2159863 | 2159910 | CSAR_peak_ | 12.13         | - |
| chr1 | 2161244 | 2161359 | CSAR_peak_ | 14.88,9.58    | - |
| chr1 | 2161490 | 2161549 | CSAR_peak_ | 7.27          | - |
| chr1 | 2161722 | 2161761 | CSAR_peak_ | 6.21          | - |
| chr1 | 2162005 | 2162097 | CSAR_peak_ | 13.48,6.21    | - |
| chr1 | 2162380 | 2162428 | CSAR_peak_ | 6.21          | - |
| chr1 | 2162858 | 2162927 | CSAR_peak_ | 7.27          | - |
| chr1 | 2164785 | 2164894 | CSAR_peak_ | 16.11,10.83   | - |

|      |         |         |            |                |   |
|------|---------|---------|------------|----------------|---|
| chr1 | 2164934 | 2164984 | CSAR_peak_ | 7.27,10.83     | - |
| chr1 | 2170314 | 2170380 | CSAR_peak_ | 9.58           | - |
| chr1 | 2178358 | 2178427 | CSAR_peak_ | 14.88          | - |
| chr1 | 2178555 | 2178621 | CSAR_peak_ | 10.33,12.31    | - |
| chr1 | 2178771 | 2178835 | CSAR_peak_ | 28.62          | - |
| chr1 | 2178915 | 2179009 | CSAR_peak_ | 26.69,16.34    | - |
| chr1 | 2179092 | 2179200 | CSAR_peak_ | 10.96,7.36,8.  | - |
| chr1 | 2179293 | 2179363 | CSAR_peak_ | 12.94,17.4     | - |
| chr1 | 2179911 | 2180003 | CSAR_peak_ | 14.88,8.39     | - |
| chr1 | 2180257 | 2180310 | CSAR_peak_ | 14.08          | - |
| chr1 | 2180588 | 2180625 | CSAR_peak_ | 10.83,7.27     | - |
| chr1 | 2180739 | 2180826 | CSAR_peak_ | 6.95,7.18,6.4  | - |
| chr1 | 2180954 | 2181020 | CSAR_peak_ | 17.28,25.07    | - |
| chr1 | 2181086 | 2181178 | CSAR_peak_ | 42.64          | - |
| chr1 | 2181376 | 2181501 | CSAR_peak_ | 14.12,16.11,,- | - |
| chr1 | 2181735 | 2181857 | CSAR_peak_ | 8.9,7.58,9.58  | - |
| chr1 | 2182082 | 2182109 | CSAR_peak_ | 6.71           | - |
| chr1 | 2182127 | 2182191 | CSAR_peak_ | 10.83          | - |
| chr1 | 2182277 | 2182421 | CSAR_peak_ | 35.83,18.65    | - |
| chr1 | 2182619 | 2182746 | CSAR_peak_ | 9.58,14.88     | - |
| chr1 | 2182811 | 2182873 | CSAR_peak_ | 12.13,42.64    | - |
| chr1 | 2183217 | 2183269 | CSAR_peak_ | 9.58           | - |
| chr1 | 2183377 | 2183400 | CSAR_peak_ | 7.92           | - |
| chr1 | 2183630 | 2183675 | CSAR_peak_ | 6.03           | - |
| chr1 | 2183887 | 2183941 | CSAR_peak_ | 9.58           | - |
| chr1 | 2187977 | 2188036 | CSAR_peak_ | 9.58           | - |
| chr1 | 2190013 | 2190186 | CSAR_peak_ | 29.2,33.31     | - |
| chr1 | 2190189 | 2190258 | CSAR_peak_ | 21.35,11.16    | - |
| chr1 | 2190336 | 2190432 | CSAR_peak_ | 8.5,18.73      | - |
| chr1 | 2190474 | 2190506 | CSAR_peak_ | 9.41           | - |
| chr1 | 2190587 | 2190679 | CSAR_peak_ | 20.94          | - |
| chr1 | 2192093 | 2192126 | CSAR_peak_ | 7.27           | - |
| chr1 | 2192491 | 2192539 | CSAR_peak_ | 8.28           | - |
| chr1 | 2192561 | 2192612 | CSAR_peak_ | 8.39           | - |
| chr1 | 2193040 | 2193092 | CSAR_peak_ | 7.27           | - |
| chr1 | 2193104 | 2193161 | CSAR_peak_ | 20.54,15.28    | - |
| chr1 | 2193262 | 2193290 | CSAR_peak_ | 6.85,20.94     | - |
| chr1 | 2193542 | 2193619 | CSAR_peak_ | 12.17          | - |
| chr1 | 2193661 | 2193735 | CSAR_peak_ | 16.33,9.61     | - |
| chr1 | 2211411 | 2211501 | CSAR_peak_ | 9.58,10.83     | - |
| chr1 | 2218006 | 2218053 | CSAR_peak_ | 7.27           | - |
| chr1 | 2218521 | 2218549 | CSAR_peak_ | 6.21           | - |



|      |         |         |            |                |   |
|------|---------|---------|------------|----------------|---|
| chr1 | 2220652 | 2220702 | CSAR_peak_ | 7.27           | - |
| chr1 | 2225986 | 2226083 | CSAR_peak_ | 14.88,7.27     | - |
| chr1 | 2227802 | 2227851 | CSAR_peak_ | 7              | - |
| chr1 | 2245971 | 2246012 | CSAR_peak_ | 7.27           | - |
| chr1 | 2247175 | 2247239 | CSAR_peak_ | 9.58           | - |
| chr1 | 2247243 | 2247316 | CSAR_peak_ | 8.39,10.83     | - |
| chr1 | 2247726 | 2247805 | CSAR_peak_ | 10.83,7.27     | - |
| chr1 | 2248742 | 2248847 | CSAR_peak_ | 6.21,8.39      | - |
| chr1 | 2248861 | 2248907 | CSAR_peak_ | 6.21           | - |
| chr1 | 2257859 | 2257925 | CSAR_peak_ | 8.99,9.55      | - |
| chr1 | 2257988 | 2258022 | CSAR_peak_ | 12.13,11.66    | - |
| chr1 | 2259003 | 2259069 | CSAR_peak_ | 16.33          | - |
| chr1 | 2259088 | 2259153 | CSAR_peak_ | 22.56,7.27     | - |
| chr1 | 2259492 | 2259542 | CSAR_peak_ | 7.26           | - |
| chr1 | 2260073 | 2260080 | CSAR_peak_ | 7.27           | - |
| chr1 | 2262257 | 2262318 | CSAR_peak_ | 7.27           | - |
| chr1 | 2262327 | 2262355 | CSAR_peak_ | 6.21           | - |
| chr1 | 2296983 | 2297123 | CSAR_peak_ | 8.14,6.02,5.8  | - |
| chr1 | 2297225 | 2297286 | CSAR_peak_ | 17.4,6.21      | - |
| chr1 | 2298880 | 2298920 | CSAR_peak_ | 6.03           | - |
| chr1 | 2313661 | 2313742 | CSAR_peak_ | 16.33          | - |
| chr1 | 2313977 | 2314060 | CSAR_peak_ | 8.14           | - |
| chr1 | 2314090 | 2314139 | CSAR_peak_ | 8.39           | - |
| chr1 | 2314893 | 2314992 | CSAR_peak_ | 7.27,10.83     | - |
| chr1 | 2315088 | 2315154 | CSAR_peak_ | 26.05,13.44    | - |
| chr1 | 2315277 | 2315350 | CSAR_peak_ | 14.88,10.83    | - |
| chr1 | 2331923 | 2331974 | CSAR_peak_ | 24.21,8.39     | - |
| chr1 | 2332397 | 2332438 | CSAR_peak_ | 6.21           | - |
| chr1 | 2337117 | 2337169 | CSAR_peak_ | 9.58           | - |
| chr1 | 2337683 | 2337706 | CSAR_peak_ | 6.21           | - |
| chr1 | 2338799 | 2338844 | CSAR_peak_ | 10.52,7.47     | - |
| chr1 | 2338906 | 2338986 | CSAR_peak_ | 9.77           | - |
| chr1 | 2338992 | 2339005 | CSAR_peak_ | 6.03           | - |
| chr1 | 2339266 | 2339363 | CSAR_peak_ | 19.36,21.1     | - |
| chr1 | 2360163 | 2360177 | CSAR_peak_ | 8.39           | - |
| chr1 | 2360270 | 2360415 | CSAR_peak_ | 28.34,13.76    | - |
| chr1 | 2360512 | 2360923 | CSAR_peak_ | 12.5,19.36,9.  | - |
| chr1 | 2360959 | 2361074 | CSAR_peak_ | 23.49,17.37    | - |
| chr1 | 2361126 | 2361280 | CSAR_peak_ | 17.88,9.27,14. | - |
| chr1 | 2361382 | 2361523 | CSAR_peak_ | 6.81,7.92,14.  | - |
| chr1 | 2361740 | 2361813 | CSAR_peak_ | 27.61,23.49    | - |
| chr1 | 2361885 | 2361947 | CSAR_peak_ | 7.27,9.41,16.  | - |

|      |         |         |            |                |
|------|---------|---------|------------|----------------|
| chr1 | 2361970 | 2362161 | CSAR_peak_ | 7.94,20.11,1:- |
| chr1 | 2362206 | 2362247 | CSAR_peak_ | 7.73,8.65 -    |
| chr1 | 2362604 | 2362666 | CSAR_peak_ | 11.99 -        |
| chr1 | 2362745 | 2362821 | CSAR_peak_ | 23.42,23.95 -  |
| chr1 | 2363103 | 2363155 | CSAR_peak_ | 16.33 -        |
| chr1 | 2363200 | 2363295 | CSAR_peak_ | 39.92,48.09 -  |
| chr1 | 2363335 | 2363437 | CSAR_peak_ | 8.28,30.8,20.- |
| chr1 | 2363576 | 2363673 | CSAR_peak_ | 44.69,9.58 -   |
| chr1 | 2363678 | 2363763 | CSAR_peak_ | 16.22,39.3,1:- |
| chr1 | 2363857 | 2363915 | CSAR_peak_ | 22.33,18.61 -  |
| chr1 | 2364093 | 2364147 | CSAR_peak_ | 7.58 -         |
| chr1 | 2364160 | 2364238 | CSAR_peak_ | 6.21 -         |
| chr1 | 2364306 | 2364368 | CSAR_peak_ | 9.58 -         |
| chr1 | 2364500 | 2364540 | CSAR_peak_ | 6.21 -         |
| chr1 | 2364597 | 2364703 | CSAR_peak_ | 14.88,11.38 -  |
| chr1 | 2365820 | 2365938 | CSAR_peak_ | 7.27 -         |
| chr1 | 2366005 | 2366023 | CSAR_peak_ | 10.83 -        |
| chr1 | 2366064 | 2366132 | CSAR_peak_ | 13.44,17.68 -  |
| chr1 | 2366150 | 2366186 | CSAR_peak_ | 5.86 -         |
| chr1 | 2366199 | 2366235 | CSAR_peak_ | 9.58 -         |
| chr1 | 2371482 | 2371529 | CSAR_peak_ | 6.03 -         |
| chr1 | 2371546 | 2371631 | CSAR_peak_ | 10.83,7.92 -   |
| chr1 | 2371652 | 2371770 | CSAR_peak_ | 7.27 -         |
| chr1 | 2372450 | 2372505 | CSAR_peak_ | 9.58 -         |
| chr1 | 2372611 | 2372663 | CSAR_peak_ | 8.39 -         |
| chr1 | 2373429 | 2373488 | CSAR_peak_ | 6.21 -         |
| chr1 | 2373502 | 2373554 | CSAR_peak_ | 8.65 -         |
| chr1 | 2373640 | 2373697 | CSAR_peak_ | 12.17,12.13 -  |
| chr1 | 2374053 | 2374114 | CSAR_peak_ | 9.61 -         |
| chr1 | 2391077 | 2391185 | CSAR_peak_ | 21.94,22.58 -  |
| chr1 | 2408718 | 2408842 | CSAR_peak_ | 10.83 -        |
| chr1 | 2430154 | 2430193 | CSAR_peak_ | 6.21 -         |
| chr1 | 2430321 | 2430387 | CSAR_peak_ | 8.13 -         |
| chr1 | 2430638 | 2430697 | CSAR_peak_ | 17.82,6.21 -   |
| chr1 | 2431090 | 2431211 | CSAR_peak_ | 6.21,8.39,9.5- |
| chr1 | 2431314 | 2431344 | CSAR_peak_ | 6.21 -         |
| chr1 | 2431702 | 2431783 | CSAR_peak_ | 14.88,28.62 -  |
| chr1 | 2463398 | 2463481 | CSAR_peak_ | 8.39,10.94 -   |
| chr1 | 2463758 | 2463821 | CSAR_peak_ | 6.21 -         |
| chr1 | 2463906 | 2463983 | CSAR_peak_ | 7.06 -         |
| chr1 | 2474628 | 2474664 | CSAR_peak_ | 7.27 -         |
| chr1 | 2490133 | 2490167 | CSAR_peak_ | 9.58 -         |

|      |         |         |            |                |   |
|------|---------|---------|------------|----------------|---|
| chr1 | 2490239 | 2490290 | CSAR_peak_ | 17.82,6.21     | - |
| chr1 | 2491683 | 2491743 | CSAR_peak_ | 10.83,8.39     | - |
| chr1 | 2496235 | 2496297 | CSAR_peak_ | 6.21           | - |
| chr1 | 2496724 | 2496774 | CSAR_peak_ | 10.83          | - |
| chr1 | 2505005 | 2505079 | CSAR_peak_ | 10.83          | - |
| chr1 | 2510110 | 2510152 | CSAR_peak_ | 5.86           | - |
| chr1 | 2538100 | 2538154 | CSAR_peak_ | 69.16,18.53,(- | - |
| chr1 | 2538178 | 2538236 | CSAR_peak_ | 149.02,145     | - |
| chr1 | 2540056 | 2540116 | CSAR_peak_ | 13.44,9.58     | - |
| chr1 | 2541103 | 2541156 | CSAR_peak_ | 10.02          | - |
| chr1 | 2573436 | 2573513 | CSAR_peak_ | 16.33          | - |
| chr1 | 2574288 | 2574427 | CSAR_peak_ | 35.83,25.91,(- | - |
| chr1 | 2574458 | 2574487 | CSAR_peak_ | 20.43          | - |
| chr1 | 2574530 | 2574806 | CSAR_peak_ | 10.99,21.33,(- | - |
| chr1 | 2574920 | 2574996 | CSAR_peak_ | 14.85,6.95     | - |
| chr1 | 2575046 | 2575119 | CSAR_peak_ | 19.36,10.95    | - |
| chr1 | 2575170 | 2575220 | CSAR_peak_ | 17.35,6.03     | - |
| chr1 | 2575268 | 2575338 | CSAR_peak_ | 7,32.25        | - |
| chr1 | 2575712 | 2575800 | CSAR_peak_ | 17.82,14.88    | - |
| chr1 | 2575920 | 2576026 | CSAR_peak_ | 19.36,8.39     | - |
| chr1 | 2576179 | 2576314 | CSAR_peak_ | 10.83,8.14     | - |
| chr1 | 2576335 | 2576394 | CSAR_peak_ | 33.47,10.95    | - |
| chr1 | 2576570 | 2576619 | CSAR_peak_ | 10.02,10.02    | - |
| chr1 | 2584384 | 2584443 | CSAR_peak_ | 6.21,9.77      | - |
| chr1 | 2584677 | 2584719 | CSAR_peak_ | 6.21           | - |
| chr1 | 2585210 | 2585252 | CSAR_peak_ | 10.83          | - |
| chr1 | 2586379 | 2586429 | CSAR_peak_ | 12.13          | - |
| chr1 | 2586492 | 2586564 | CSAR_peak_ | 7.92,6.57,6.8- | - |
| chr1 | 2622301 | 2622351 | CSAR_peak_ | 7.92           | - |
| chr1 | 2623362 | 2623450 | CSAR_peak_ | 27.61          | - |
| chr1 | 2624665 | 2624732 | CSAR_peak_ | 12.13,7.27     | - |
| chr1 | 2625774 | 2625848 | CSAR_peak_ | 6.81,9.58,14.- | - |
| chr1 | 2640982 | 2641112 | CSAR_peak_ | 13.29,24.74,(- | - |
| chr1 | 2641140 | 2641224 | CSAR_peak_ | 13.66,7.51     | - |
| chr1 | 2641484 | 2641595 | CSAR_peak_ | 16.36,15.5     | - |
| chr1 | 2641673 | 2641754 | CSAR_peak_ | 12.17          | - |
| chr1 | 2668015 | 2668045 | CSAR_peak_ | 6.03           | - |
| chr1 | 2668299 | 2668375 | CSAR_peak_ | 6.21,33.42     | - |
| chr1 | 2668468 | 2668520 | CSAR_peak_ | 25.16,9.48     | - |
| chr1 | 2668774 | 2668814 | CSAR_peak_ | 7.27           | - |
| chr1 | 2669431 | 2669461 | CSAR_peak_ | 7.92           | - |
| chr1 | 2669648 | 2669689 | CSAR_peak_ | 8.2,6.1        | - |

|      |         |         |            |                |   |
|------|---------|---------|------------|----------------|---|
| chr1 | 2669832 | 2669879 | CSAR_peak_ | 12.13          | - |
| chr1 | 2670159 | 2670188 | CSAR_peak_ | 6.94           | - |
| chr1 | 2670210 | 2670256 | CSAR_peak_ | 8.65,7.92      | - |
| chr1 | 2670360 | 2670397 | CSAR_peak_ | 6.21           | - |
| chr1 | 2686950 | 2687036 | CSAR_peak_ | 7.27           | - |
| chr1 | 2691125 | 2691175 | CSAR_peak_ | 7.27           | - |
| chr1 | 2691627 | 2691668 | CSAR_peak_ | 6.21           | - |
| chr1 | 2691957 | 2692027 | CSAR_peak_ | 13.48,7.58     | - |
| chr1 | 2692089 | 2692150 | CSAR_peak_ | 28.34          | - |
| chr1 | 2692356 | 2692391 | CSAR_peak_ | 10.95          | - |
| chr1 | 2692449 | 2692487 | CSAR_peak_ | 9.77           | - |
| chr1 | 2692697 | 2692831 | CSAR_peak_ | 9.77,16.33     | - |
| chr1 | 2692912 | 2692941 | CSAR_peak_ | 10.83          | - |
| chr1 | 2693052 | 2693100 | CSAR_peak_ | 8.39           | - |
| chr1 | 2693162 | 2693234 | CSAR_peak_ | 10.33,20.05    | - |
| chr1 | 2744102 | 2744157 | CSAR_peak_ | 7.27           | - |
| chr1 | 2744261 | 2744342 | CSAR_peak_ | 16.92,16.33    | - |
| chr1 | 2744475 | 2744534 | CSAR_peak_ | 10.83,7.92     | - |
| chr1 | 2744682 | 2744708 | CSAR_peak_ | 9.58           | - |
| chr1 | 2744754 | 2744807 | CSAR_peak_ | 8.28           | - |
| chr1 | 2745129 | 2745177 | CSAR_peak_ | 14.85,7.92     | - |
| chr1 | 2745201 | 2745544 | CSAR_peak_ | 14.88,10.83,,- | - |
| chr1 | 2745549 | 2745703 | CSAR_peak_ | 10.18,12.17,,- | - |
| chr1 | 2748145 | 2748250 | CSAR_peak_ | 8.39,7.27      | - |
| chr1 | 2748632 | 2748735 | CSAR_peak_ | 11.38,17.35,,- | - |
| chr1 | 2749214 | 2749263 | CSAR_peak_ | 17.82,12.31    | - |
| chr1 | 2749482 | 2749517 | CSAR_peak_ | 9.58,13.48     | - |
| chr1 | 2750315 | 2750377 | CSAR_peak_ | 12.17          | - |
| chr1 | 2757353 | 2757502 | CSAR_peak_ | 13.92,9.61     | - |
| chr1 | 2758531 | 2758608 | CSAR_peak_ | 12.31,6.95     | - |
| chr1 | 2758817 | 2758891 | CSAR_peak_ | 19.36,22.56    | - |
| chr1 | 2810056 | 2810138 | CSAR_peak_ | 6.87           | - |
| chr1 | 2820025 | 2820088 | CSAR_peak_ | 9.58           | - |
| chr1 | 2821874 | 2821929 | CSAR_peak_ | 8.39,7.53      | - |
| chr1 | 2822017 | 2822046 | CSAR_peak_ | 6.21           | - |
| chr1 | 2822177 | 2822306 | CSAR_peak_ | 9.58,16.08     | - |
| chr1 | 2822437 | 2822635 | CSAR_peak_ | 14.88,17.82,,- | - |
| chr1 | 2822849 | 2822901 | CSAR_peak_ | 8.39           | - |
| chr1 | 2822952 | 2823009 | CSAR_peak_ | 6.21           | - |
| chr1 | 2823109 | 2823159 | CSAR_peak_ | 6.03           | - |
| chr1 | 2847643 | 2847690 | CSAR_peak_ | 7.27           | - |
| chr1 | 2896275 | 2896374 | CSAR_peak_ | 14.88          | - |

|      |         |         |            |                |   |
|------|---------|---------|------------|----------------|---|
| chr1 | 2896537 | 2896590 | CSAR_peak_ | 8.39,16.11     | - |
| chr1 | 2897453 | 2897471 | CSAR_peak_ | 12.13          | - |
| chr1 | 2897557 | 2897647 | CSAR_peak_ | 14.88,9.58     | - |
| chr1 | 2897670 | 2897719 | CSAR_peak_ | 6.21           | - |
| chr1 | 2897949 | 2898090 | CSAR_peak_ | 17.82          | - |
| chr1 | 2898305 | 2898364 | CSAR_peak_ | 10.02          | - |
| chr1 | 2901825 | 2901871 | CSAR_peak_ | 7.27           | - |
| chr1 | 2902136 | 2902185 | CSAR_peak_ | 7.27,9.77      | - |
| chr1 | 2902697 | 2902712 | CSAR_peak_ | 12.13          | - |
| chr1 | 2902839 | 2902895 | CSAR_peak_ | 12.13          | - |
| chr1 | 2903252 | 2903290 | CSAR_peak_ | 10.83          | - |
| chr1 | 2904208 | 2904247 | CSAR_peak_ | 6.21           | - |
| chr1 | 2922003 | 2922063 | CSAR_peak_ | 7.27           | - |
| chr1 | 2922167 | 2922211 | CSAR_peak_ | 6.21           | - |
| chr1 | 2922292 | 2922385 | CSAR_peak_ | 12.74,6.21     | - |
| chr1 | 2923081 | 2923171 | CSAR_peak_ | 8.9            | - |
| chr1 | 2923231 | 2923287 | CSAR_peak_ | 6.21           | - |
| chr1 | 2924245 | 2924305 | CSAR_peak_ | 7.27           | - |
| chr1 | 2924725 | 2924780 | CSAR_peak_ | 17.82          | - |
| chr1 | 2924938 | 2925015 | CSAR_peak_ | 7.92           | - |
| chr1 | 2925025 | 2925088 | CSAR_peak_ | 9.58,8.39      | - |
| chr1 | 2925185 | 2925223 | CSAR_peak_ | 6.21           | - |
| chr1 | 2938772 | 2938809 | CSAR_peak_ | 7.27           | - |
| chr1 | 2940137 | 2940153 | CSAR_peak_ | 6.03           | - |
| chr1 | 2940395 | 2940456 | CSAR_peak_ | 12.31          | - |
| chr1 | 2940523 | 2940577 | CSAR_peak_ | 7.58           | - |
| chr1 | 2940976 | 2941020 | CSAR_peak_ | 6.21           | - |
| chr1 | 2941229 | 2941258 | CSAR_peak_ | 9.58           | - |
| chr1 | 2941364 | 2941393 | CSAR_peak_ | 9.77           | - |
| chr1 | 2941547 | 2941590 | CSAR_peak_ | 17.82,9.58     | - |
| chr1 | 2942703 | 2942745 | CSAR_peak_ | 7.27           | - |
| chr1 | 2942837 | 2942902 | CSAR_peak_ | 25.34,14.76    | - |
| chr1 | 2943169 | 2943296 | CSAR_peak_ | 7.27,6.21,12.- | - |
| chr1 | 2943443 | 2943565 | CSAR_peak_ | 16.33,24.76    | - |
| chr1 | 2944169 | 2944221 | CSAR_peak_ | 7.27,18.73,8.- | - |
| chr1 | 2944234 | 2944247 | CSAR_peak_ | 7.27           | - |
| chr1 | 2944344 | 2944500 | CSAR_peak_ | 13.37,18.47,{- | - |
| chr1 | 2944558 | 2944587 | CSAR_peak_ | 6.37           | - |
| chr1 | 2944730 | 2944778 | CSAR_peak_ | 9.25,7.29,8.9- | - |
| chr1 | 2945200 | 2945292 | CSAR_peak_ | 18.85,17.28    | - |
| chr1 | 2945382 | 2945457 | CSAR_peak_ | 19.01,17.87,{- | - |
| chr1 | 2945543 | 2945609 | CSAR_peak_ | 9.29,6.61      | - |

|      |         |         |            |                |
|------|---------|---------|------------|----------------|
| chr1 | 2945742 | 2945860 | CSAR_peak_ | 5.9,12.93,16.- |
| chr1 | 2952514 | 2952578 | CSAR_peak_ | 8.39 -         |
| chr1 | 2953533 | 2953587 | CSAR_peak_ | 10.83 -        |
| chr1 | 2954332 | 2954379 | CSAR_peak_ | 8.09 -         |
| chr1 | 2954409 | 2954457 | CSAR_peak_ | 9.58 -         |
| chr1 | 2954850 | 2954898 | CSAR_peak_ | 7.27 -         |
| chr1 | 2955027 | 2955070 | CSAR_peak_ | 7.27 -         |
| chr1 | 2970668 | 2970747 | CSAR_peak_ | 8.09 -         |
| chr1 | 2972040 | 2972110 | CSAR_peak_ | 6.21 -         |
| chr1 | 2973369 | 2973401 | CSAR_peak_ | 6.1 -          |
| chr1 | 2973718 | 2973774 | CSAR_peak_ | 11.38,7.26 -   |
| chr1 | 2973859 | 2973899 | CSAR_peak_ | 8.39 -         |
| chr1 | 2974040 | 2974108 | CSAR_peak_ | 10.83 -        |
| chr1 | 2974928 | 2975033 | CSAR_peak_ | 6.95,27.64 -   |
| chr1 | 2975206 | 2975237 | CSAR_peak_ | 7.27 -         |
| chr1 | 2975749 | 2975755 | CSAR_peak_ | 6.21 -         |
| chr1 | 2975849 | 2975893 | CSAR_peak_ | 16.33 -        |
| chr1 | 2980241 | 2980299 | CSAR_peak_ | 17.82,23.49 -  |
| chr1 | 2980685 | 2980703 | CSAR_peak_ | 6.21 -         |
| chr1 | 2980733 | 2980779 | CSAR_peak_ | 8.39 -         |
| chr1 | 2980946 | 2981013 | CSAR_peak_ | 9.58,13.48 -   |
| chr1 | 2981791 | 2981879 | CSAR_peak_ | 12.13 -        |
| chr1 | 2981889 | 2981939 | CSAR_peak_ | 6.21 -         |
| chr1 | 2999756 | 2999826 | CSAR_peak_ | 16.33 -        |
| chr1 | 2999849 | 2999950 | CSAR_peak_ | 9.61,13.51 -   |
| chr1 | 3010783 | 3010849 | CSAR_peak_ | 7.27 -         |
| chr1 | 3014886 | 3014934 | CSAR_peak_ | 7.27 -         |
| chr1 | 3039322 | 3039419 | CSAR_peak_ | 16.33 -        |
| chr1 | 3095541 | 3095624 | CSAR_peak_ | 12.35 -        |
| chr1 | 3095654 | 3095758 | CSAR_peak_ | 18.95,8.9,10.- |
| chr1 | 3095782 | 3095835 | CSAR_peak_ | 12.13 -        |
| chr1 | 3095937 | 3096119 | CSAR_peak_ | 31.2,9.58 -    |
| chr1 | 3096181 | 3096365 | CSAR_peak_ | 10.94,12.13 -  |
| chr1 | 3096432 | 3096493 | CSAR_peak_ | 13.51 -        |
| chr1 | 3096516 | 3096723 | CSAR_peak_ | 33.03,17.82,-  |
| chr1 | 3096757 | 3096971 | CSAR_peak_ | 34.84,17.82 -  |
| chr1 | 3097158 | 3097226 | CSAR_peak_ | 30.8,28.21 -   |
| chr1 | 3097258 | 3097396 | CSAR_peak_ | 16.33,8.95 -   |
| chr1 | 3097580 | 3097626 | CSAR_peak_ | 6.21 -         |
| chr1 | 3097738 | 3097785 | CSAR_peak_ | 6.03 -         |
| chr1 | 3098322 | 3098383 | CSAR_peak_ | 19.98,8.39 -   |
| chr1 | 3099120 | 3099200 | CSAR_peak_ | 10.83 -        |

|      |         |         |             |                  |   |
|------|---------|---------|-------------|------------------|---|
| chr1 | 3100283 | 3100331 | CSAR_peak_1 | 6.21             | - |
| chr1 | 3101858 | 3101931 | CSAR_peak_1 | 7.27,9.77        | - |
| chr1 | 3101941 | 3101985 | CSAR_peak_1 | 7.27             | - |
| chr1 | 3102121 | 3102182 | CSAR_peak_1 | 7.27             | - |
| chr1 | 3102183 | 3102306 | CSAR_peak_1 | 14.88            | - |
| chr1 | 3102312 | 3102365 | CSAR_peak_1 | 11.96            | - |
| chr1 | 3102442 | 3102490 | CSAR_peak_1 | 8.39,9.58        | - |
| chr1 | 3102716 | 3102772 | CSAR_peak_1 | 10.83            | - |
| chr1 | 3128157 | 3128191 | CSAR_peak_1 | 6.95             | - |
| chr1 | 3128259 | 3128289 | CSAR_peak_1 | 9.58             | - |
| chr1 | 3128885 | 3128909 | CSAR_peak_1 | 9.58             | - |
| chr1 | 3137378 | 3137427 | CSAR_peak_1 | 9.27             | - |
| chr1 | 3150776 | 3150826 | CSAR_peak_1 | 8.95             | - |
| chr1 | 3151180 | 3151232 | CSAR_peak_1 | 8.39             | - |
| chr1 | 3151900 | 3151985 | CSAR_peak_1 | 17.82,24.17      | - |
| chr1 | 3151987 | 3152022 | CSAR_peak_1 | 6.1              | - |
| chr1 | 3152521 | 3152579 | CSAR_peak_1 | 6.21,13.48       | - |
| chr1 | 3153144 | 3153206 | CSAR_peak_1 | 10.83            | - |
| chr1 | 3154099 | 3154136 | CSAR_peak_1 | 6.21             | - |
| chr1 | 3158039 | 3158108 | CSAR_peak_1 | 8.14,5.86        | - |
| chr1 | 3161582 | 3161630 | CSAR_peak_1 | 6.21             | - |
| chr1 | 3165531 | 3165613 | CSAR_peak_1 | 8.39             | - |
| chr1 | 3165615 | 3165698 | CSAR_peak_1 | 7.27,7.27        | - |
| chr1 | 3165839 | 3165852 | CSAR_peak_1 | 6.44             | - |
| chr1 | 3165900 | 3165954 | CSAR_peak_1 | 6.54             | - |
| chr1 | 3166039 | 3166135 | CSAR_peak_1 | 14.76,7.92,11.96 | - |
| chr1 | 3166224 | 3166292 | CSAR_peak_1 | 14.88,8.95       | - |
| chr1 | 3166315 | 3166425 | CSAR_peak_1 | 12.17,7.34       | - |
| chr1 | 3166583 | 3166646 | CSAR_peak_1 | 16.33,6.57       | - |
| chr1 | 3166812 | 3166892 | CSAR_peak_1 | 14.88            | - |
| chr1 | 3166900 | 3166937 | CSAR_peak_1 | 7.58             | - |
| chr1 | 3167018 | 3167093 | CSAR_peak_1 | 25.62            | - |
| chr1 | 3167101 | 3167243 | CSAR_peak_1 | 29.4,14.88       | - |
| chr1 | 3177330 | 3177379 | CSAR_peak_1 | 9.58             | - |
| chr1 | 3180535 | 3180673 | CSAR_peak_1 | 26.91,26.06      | - |
| chr1 | 3197616 | 3197647 | CSAR_peak_1 | 7.27             | - |
| chr1 | 3197743 | 3197794 | CSAR_peak_1 | 10.83            | - |
| chr1 | 3197887 | 3197937 | CSAR_peak_1 | 5.86             | - |
| chr1 | 3197945 | 3198002 | CSAR_peak_1 | 9.77,9.58        | - |
| chr1 | 3198669 | 3198766 | CSAR_peak_1 | 23.03,13.51      | - |
| chr1 | 3199014 | 3199065 | CSAR_peak_1 | 7.27             | - |
| chr1 | 3199172 | 3199254 | CSAR_peak_1 | 6.21,12.59       | - |

|      |         |         |            |                |
|------|---------|---------|------------|----------------|
| chr1 | 3199381 | 3199459 | CSAR_peak_ | 29.21,9.97,5.- |
| chr1 | 3199464 | 3199558 | CSAR_peak_ | 17.68,18.95 -  |
| chr1 | 3221328 | 3221405 | CSAR_peak_ | 13.48,6.21 -   |
| chr1 | 3222029 | 3222080 | CSAR_peak_ | 7.27 -         |
| chr1 | 3222745 | 3222819 | CSAR_peak_ | 7.27 -         |
| chr1 | 3223340 | 3223415 | CSAR_peak_ | 8.14,11.75 -   |
| chr1 | 3223528 | 3223597 | CSAR_peak_ | 16.08,12.27 -  |
| chr1 | 3224889 | 3224925 | CSAR_peak_ | 9.58 -         |
| chr1 | 3224945 | 3224995 | CSAR_peak_ | 8.2 -          |
| chr1 | 3225006 | 3225042 | CSAR_peak_ | 8.39,7.27 -    |
| chr1 | 3225116 | 3225238 | CSAR_peak_ | 20.94,24.21 -  |
| chr1 | 3225304 | 3225442 | CSAR_peak_ | 14.88,17.82 -  |
| chr1 | 3225491 | 3225558 | CSAR_peak_ | 6.81 -         |
| chr1 | 3226037 | 3226106 | CSAR_peak_ | 18.95,9.58 -   |
| chr1 | 3226525 | 3226595 | CSAR_peak_ | 7.27,7.58 -    |
| chr1 | 3232006 | 3232055 | CSAR_peak_ | 24.21,12.13 -  |
| chr1 | 3237245 | 3237328 | CSAR_peak_ | 22.56 -        |
| chr1 | 3237378 | 3237436 | CSAR_peak_ | 6.44,9.58 -    |
| chr1 | 3237529 | 3237653 | CSAR_peak_ | 9.58,7.27 -    |
| chr1 | 3238233 | 3238289 | CSAR_peak_ | 6.21 -         |
| chr1 | 3238544 | 3238630 | CSAR_peak_ | 10.83 -        |
| chr1 | 3240996 | 3241083 | CSAR_peak_ | 8.14 -         |
| chr1 | 3241146 | 3241197 | CSAR_peak_ | 9.58 -         |
| chr1 | 3257878 | 3258020 | CSAR_peak_ | 12.13,10.83 -  |
| chr1 | 3258485 | 3258538 | CSAR_peak_ | 17.82,7.27 -   |
| chr1 | 3258613 | 3258673 | CSAR_peak_ | 25.62,27.64 -  |
| chr1 | 3260519 | 3260587 | CSAR_peak_ | 12.31 -        |
| chr1 | 3270344 | 3270392 | CSAR_peak_ | 8.39 -         |
| chr1 | 3270459 | 3270468 | CSAR_peak_ | 6.03 -         |
| chr1 | 3289203 | 3289252 | CSAR_peak_ | 12.13 -        |
| chr1 | 3290073 | 3290126 | CSAR_peak_ | 7.92,24.21 -   |
| chr1 | 3290529 | 3290604 | CSAR_peak_ | 9.58 -         |
| chr1 | 3290635 | 3290767 | CSAR_peak_ | 24.21,29.69 -  |
| chr1 | 3290983 | 3291038 | CSAR_peak_ | 10.83 -        |
| chr1 | 3291153 | 3291210 | CSAR_peak_ | 7.58,22.56 -   |
| chr1 | 3291238 | 3291300 | CSAR_peak_ | 13.48,12.17,-  |
| chr1 | 3291431 | 3291483 | CSAR_peak_ | 7.58 -         |
| chr1 | 3291638 | 3292030 | CSAR_peak_ | 9.58,12.59,5.- |
| chr1 | 3292051 | 3292243 | CSAR_peak_ | 26.05,18.85,-  |
| chr1 | 3292283 | 3292346 | CSAR_peak_ | 7.27,7.27 -    |
| chr1 | 3292438 | 3292585 | CSAR_peak_ | 43.13,42.44 -  |
| chr1 | 3292623 | 3292680 | CSAR_peak_ | 8.39 -         |



|      |         |         |            |                |   |
|------|---------|---------|------------|----------------|---|
| chr1 | 3292701 | 3292851 | CSAR_peak_ | 13.56,45.5     | - |
| chr1 | 3292853 | 3292898 | CSAR_peak_ | 8.09           | - |
| chr1 | 3292941 | 3292992 | CSAR_peak_ | 6.21           | - |
| chr1 | 3293022 | 3293143 | CSAR_peak_ | 21.81,20.77    | - |
| chr1 | 3293256 | 3293627 | CSAR_peak_ | 18.45,13.47,,- | - |
| chr1 | 3293633 | 3293763 | CSAR_peak_ | 6.21           | - |
| chr1 | 3293928 | 3293989 | CSAR_peak_ | 13.48          | - |
| chr1 | 3294025 | 3294089 | CSAR_peak_ | 6.21,12.13     | - |
| chr1 | 3294130 | 3294240 | CSAR_peak_ | 31.2,20.43     | - |
| chr1 | 3294296 | 3294402 | CSAR_peak_ | 11.66,13.48    | - |
| chr1 | 3294504 | 3294542 | CSAR_peak_ | 7.58           | - |
| chr1 | 3294666 | 3294922 | CSAR_peak_ | 34.93,20.43,,- | - |
| chr1 | 3294968 | 3295172 | CSAR_peak_ | 28.7,17.82,7.- | - |
| chr1 | 3295238 | 3295312 | CSAR_peak_ | 10.31,21.35    | - |
| chr1 | 3295324 | 3295390 | CSAR_peak_ | 22.56,9.77     | - |
| chr1 | 3295567 | 3295629 | CSAR_peak_ | 17.82          | - |
| chr1 | 3295664 | 3295707 | CSAR_peak_ | 8.39           | - |
| chr1 | 3295999 | 3296094 | CSAR_peak_ | 14.85,31.19    | - |
| chr1 | 3298340 | 3298391 | CSAR_peak_ | 5.86,8.09      | - |
| chr1 | 3320836 | 3320939 | CSAR_peak_ | 7.27           | - |
| chr1 | 3321228 | 3321531 | CSAR_peak_ | 24.21,5.86,1,- | - |
| chr1 | 3322534 | 3322662 | CSAR_peak_ | 33.03,16.05    | - |
| chr1 | 3322742 | 3322808 | CSAR_peak_ | 12.13          | - |
| chr1 | 3322844 | 3322902 | CSAR_peak_ | 7.27           | - |
| chr1 | 3323031 | 3323074 | CSAR_peak_ | 7.27,20.94     | - |
| chr1 | 3323128 | 3323273 | CSAR_peak_ | 19.25,27.93    | - |
| chr1 | 3323355 | 3323486 | CSAR_peak_ | 20.43,20.94    | - |
| chr1 | 3329356 | 3329409 | CSAR_peak_ | 8.39,10.83     | - |
| chr1 | 3333153 | 3333246 | CSAR_peak_ | 10.83,14.76    | - |
| chr1 | 3333283 | 3333385 | CSAR_peak_ | 12.74,24.21    | - |
| chr1 | 3335344 | 3335389 | CSAR_peak_ | 9.58           | - |
| chr1 | 3335747 | 3335805 | CSAR_peak_ | 7.27           | - |
| chr1 | 3336010 | 3336059 | CSAR_peak_ | 8.39,6.21      | - |
| chr1 | 3336497 | 3336547 | CSAR_peak_ | 6.21           | - |
| chr1 | 3336890 | 3336949 | CSAR_peak_ | 6.57           | - |
| chr1 | 3346663 | 3346796 | CSAR_peak_ | 28.34,9.72,1,- | - |
| chr1 | 3346832 | 3346950 | CSAR_peak_ | 11.8,6.81,5.9- | - |
| chr1 | 3347021 | 3347136 | CSAR_peak_ | 13.92,25.08,,- | - |
| chr1 | 3347205 | 3347259 | CSAR_peak_ | 21.22,10.52    | - |
| chr1 | 3347341 | 3347409 | CSAR_peak_ | 21.22,9.58     | - |
| chr1 | 3347496 | 3347602 | CSAR_peak_ | 16.33,5.86     | - |
| chr1 | 3347662 | 3347712 | CSAR_peak_ | 7.27           | - |

|      |         |         |             |                   |   |
|------|---------|---------|-------------|-------------------|---|
| chr1 | 3347717 | 3347793 | CSAR_peak_1 | 10.94,9.58        | - |
| chr1 | 3384203 | 3384309 | CSAR_peak_1 | 7.27,7.27         | - |
| chr1 | 3384331 | 3384692 | CSAR_peak_1 | 19.36,8.39,3.27   | - |
| chr1 | 3384758 | 3384805 | CSAR_peak_1 | 9.58              | - |
| chr1 | 3385623 | 3385685 | CSAR_peak_1 | 9.27              | - |
| chr1 | 3387242 | 3387298 | CSAR_peak_1 | 8.39              | - |
| chr1 | 3387508 | 3387558 | CSAR_peak_1 | 6.21              | - |
| chr1 | 3387728 | 3387790 | CSAR_peak_1 | 14.88,7.27        | - |
| chr1 | 3387969 | 3388030 | CSAR_peak_1 | 7.27              | - |
| chr1 | 3388085 | 3388349 | CSAR_peak_1 | 9.55,8.39,10.27   | - |
| chr1 | 3394755 | 3394832 | CSAR_peak_1 | 20.94,16.33       | - |
| chr1 | 3395996 | 3396073 | CSAR_peak_1 | 6.21              | - |
| chr1 | 3407187 | 3407348 | CSAR_peak_1 | 7.92,7.27         | - |
| chr1 | 3407424 | 3407709 | CSAR_peak_1 | 36.59,17.47,10.27 | - |
| chr1 | 3407768 | 3407830 | CSAR_peak_1 | 6.21,9.77         | - |
| chr1 | 3407842 | 3407994 | CSAR_peak_1 | 34.89,22.56,10.27 | - |
| chr1 | 3409310 | 3409362 | CSAR_peak_1 | 25.91,10.83       | - |
| chr1 | 3409426 | 3409450 | CSAR_peak_1 | 17.82             | - |
| chr1 | 3410556 | 3410607 | CSAR_peak_1 | 7.58              | - |
| chr1 | 3411733 | 3411766 | CSAR_peak_1 | 7.27              | - |
| chr1 | 3415070 | 3415131 | CSAR_peak_1 | 5.86,7.34         | - |
| chr1 | 3415425 | 3415500 | CSAR_peak_1 | 6.21              | - |
| chr1 | 3415595 | 3415641 | CSAR_peak_1 | 9.48,17.82        | - |
| chr1 | 3416143 | 3416193 | CSAR_peak_1 | 9.58              | - |
| chr1 | 3416833 | 3416994 | CSAR_peak_1 | 25.62,13.48       | - |
| chr1 | 3417026 | 3417149 | CSAR_peak_1 | 21.56,9.58        | - |
| chr1 | 3417204 | 3417473 | CSAR_peak_1 | 15.68,16.33,10.27 | - |
| chr1 | 3417476 | 3417635 | CSAR_peak_1 | 7.58,13.48        | - |
| chr1 | 3417885 | 3417911 | CSAR_peak_1 | 7.26              | - |
| chr1 | 3417986 | 3418151 | CSAR_peak_1 | 24.21,6.81,10.27  | - |
| chr1 | 3418216 | 3418254 | CSAR_peak_1 | 9.58              | - |
| chr1 | 3418325 | 3418405 | CSAR_peak_1 | 14.76,7.58        | - |
| chr1 | 3418549 | 3418558 | CSAR_peak_1 | 6.21              | - |
| chr1 | 3418577 | 3418626 | CSAR_peak_1 | 6.81              | - |
| chr1 | 3418652 | 3418757 | CSAR_peak_1 | 10.83,9.58        | - |
| chr1 | 3419226 | 3419281 | CSAR_peak_1 | 7.73              | - |
| chr1 | 3419292 | 3419340 | CSAR_peak_1 | 14.85             | - |
| chr1 | 3428981 | 3429084 | CSAR_peak_1 | 8.39,9.58         | - |
| chr1 | 3429538 | 3429595 | CSAR_peak_1 | 8.39              | - |
| chr1 | 3429695 | 3429795 | CSAR_peak_1 | 11.63,12.13       | - |
| chr1 | 3442656 | 3442691 | CSAR_peak_1 | 6.03              | - |
| chr1 | 3442768 | 3442838 | CSAR_peak_1 | 12.6              | - |

|      |         |         |            |                |         |
|------|---------|---------|------------|----------------|---------|
| chr1 | 3442912 | 3443052 | CSAR_peak_ | 21.37,23.03    | -       |
| chr1 | 3443099 | 3443206 | CSAR_peak_ | 40.49,33.31    | -       |
| chr1 | 3443236 | 3443372 | CSAR_peak_ | 34.93,17.3     | -       |
| chr1 | 3443417 | 3443529 | CSAR_peak_ | 6.72,6.87,26.- |         |
| chr1 | 3443582 | 3443713 | CSAR_peak_ | 10.62,23.03,!  | -       |
| chr1 | 3443718 | 3443763 | CSAR_peak_ |                | 12.13 - |
| chr1 | 3460718 | 3460791 | CSAR_peak_ |                | 7.27 -  |
| chr1 | 3460873 | 3460918 | CSAR_peak_ |                | 7.27 -  |
| chr1 | 3460994 | 3461044 | CSAR_peak_ |                | 7.27 -  |
| chr1 | 3502427 | 3502508 | CSAR_peak_ |                | 8.39 -  |
| chr1 | 3502763 | 3502834 | CSAR_peak_ |                | 13.48 - |
| chr1 | 3524471 | 3524587 | CSAR_peak_ |                | 13.48 - |
| chr1 | 3525210 | 3525256 | CSAR_peak_ |                | 9.58 -  |
| chr1 | 3545352 | 3545391 | CSAR_peak_ |                | 7.27 -  |
| chr1 | 3568616 | 3568661 | CSAR_peak_ |                | 7.27 -  |
| chr1 | 3569450 | 3569553 | CSAR_peak_ |                | 9.58 -  |
| chr1 | 3569732 | 3569742 | CSAR_peak_ | 7.27,7.27      | -       |
| chr1 | 3569837 | 3569896 | CSAR_peak_ | 14.08,6.44,2(- |         |
| chr1 | 3570103 | 3570136 | CSAR_peak_ |                | 6.21 -  |
| chr1 | 3582021 | 3582081 | CSAR_peak_ |                | 8.95 -  |
| chr1 | 3582158 | 3582257 | CSAR_peak_ | 7.27,17.51,6.- |         |
| chr1 | 3582601 | 3582637 | CSAR_peak_ |                | 7.27 -  |
| chr1 | 3583338 | 3583374 | CSAR_peak_ |                | 8.39 -  |
| chr1 | 3583771 | 3583807 | CSAR_peak_ |                | 6.21 -  |
| chr1 | 3583930 | 3584024 | CSAR_peak_ | 7.27,9.58      | -       |
| chr1 | 3584175 | 3584252 | CSAR_peak_ | 20.94,7.27     | -       |
| chr1 | 3584348 | 3584486 | CSAR_peak_ | 12.13,10.83,(  | -       |
| chr1 | 3584968 | 3585095 | CSAR_peak_ | 14.88,16.11    | -       |
| chr1 | 3585115 | 3585151 | CSAR_peak_ |                | 7.34 -  |
| chr1 | 3585228 | 3585288 | CSAR_peak_ | 17.82,5.86,7.- |         |
| chr1 | 3585502 | 3585569 | CSAR_peak_ |                | 12.13 - |
| chr1 | 3585724 | 3585818 | CSAR_peak_ | 9.97,19.36,6.- |         |
| chr1 | 3585825 | 3585910 | CSAR_peak_ | 10.83,31.2     | -       |
| chr1 | 3585995 | 3586109 | CSAR_peak_ | 24.21,7.29     | -       |
| chr1 | 3586343 | 3586407 | CSAR_peak_ | 7.27,12.94     | -       |
| chr1 | 3586409 | 3586519 | CSAR_peak_ | 14.88,10.31    | -       |
| chr1 | 3586656 | 3586753 | CSAR_peak_ | 20.94,5.86,7.- |         |
| chr1 | 3586805 | 3586822 | CSAR_peak_ | 6.57,8.65      | -       |
| chr1 | 3587072 | 3587154 | CSAR_peak_ | 10.83,6.21,1(- |         |
| chr1 | 3587252 | 3587384 | CSAR_peak_ | 10.94,7.34     | -       |
| chr1 | 3587516 | 3587619 | CSAR_peak_ |                | 6.21 -  |
| chr1 | 3587702 | 3587793 | CSAR_peak_ | 7.27,6.21      | -       |

|      |         |         |             |                |
|------|---------|---------|-------------|----------------|
| chr1 | 3587964 | 3588131 | CSAR_peak_1 | 12.13,12.13,-  |
| chr1 | 3588141 | 3588194 | CSAR_peak_1 | 8.65,6.57 -    |
| chr1 | 3588206 | 3588243 | CSAR_peak_1 | 6.21 -         |
| chr1 | 3588308 | 3588334 | CSAR_peak_1 | 6.21 -         |
| chr1 | 3588702 | 3588796 | CSAR_peak_1 | 13.69,5.95,11- |
| chr1 | 3588983 | 3589069 | CSAR_peak_1 | 9.58 -         |
| chr1 | 3589156 | 3589237 | CSAR_peak_1 | 14.88,19.36 -  |
| chr1 | 3589365 | 3589395 | CSAR_peak_1 | 7.27 -         |
| chr1 | 3589410 | 3589451 | CSAR_peak_1 | 6.21 -         |
| chr1 | 3589820 | 3589866 | CSAR_peak_1 | 10.33 -        |
| chr1 | 3589876 | 3590082 | CSAR_peak_1 | 13.48,6.95,3(- |
| chr1 | 3590425 | 3590435 | CSAR_peak_1 | 9.58 -         |
| chr1 | 3601303 | 3601439 | CSAR_peak_1 | 14.88 -        |
| chr1 | 3601713 | 3601756 | CSAR_peak_1 | 9.58 -         |
| chr1 | 3602354 | 3602400 | CSAR_peak_1 | 7.27 -         |
| chr1 | 3603002 | 3603035 | CSAR_peak_1 | 5.86,7.27 -    |
| chr1 | 3603963 | 3603996 | CSAR_peak_1 | 6.85 -         |
| chr1 | 3604436 | 3604540 | CSAR_peak_1 | 6.21,8.95 -    |
| chr1 | 3608134 | 3608202 | CSAR_peak_1 | 8.39 -         |
| chr1 | 3608376 | 3608421 | CSAR_peak_1 | 6.21 -         |
| chr1 | 3609048 | 3609092 | CSAR_peak_1 | 9.58,9.77 -    |
| chr1 | 3609613 | 3609663 | CSAR_peak_1 | 6.95 -         |
| chr1 | 3609739 | 3609808 | CSAR_peak_1 | 7.27 -         |
| chr1 | 3609934 | 3609981 | CSAR_peak_1 | 5.86 -         |
| chr1 | 3610094 | 3610176 | CSAR_peak_1 | 25.91 -        |
| chr1 | 3610290 | 3610346 | CSAR_peak_1 | 9.58 -         |
| chr1 | 3614777 | 3614831 | CSAR_peak_1 | 8.39,7.58 -    |
| chr1 | 3615037 | 3615091 | CSAR_peak_1 | 8.65,12.13 -   |
| chr1 | 3620397 | 3620462 | CSAR_peak_1 | 14.88 -        |
| chr1 | 3632605 | 3632676 | CSAR_peak_1 | 6.21 -         |
| chr1 | 3635983 | 3636046 | CSAR_peak_1 | 9.58 -         |
| chr1 | 3646620 | 3646700 | CSAR_peak_1 | 6.21,7.27 -    |
| chr1 | 3646856 | 3646915 | CSAR_peak_1 | 7.58 -         |
| chr1 | 3647001 | 3647051 | CSAR_peak_1 | 6.21 -         |
| chr1 | 3647256 | 3647366 | CSAR_peak_1 | 24.21,17.82 -  |
| chr1 | 3655908 | 3655965 | CSAR_peak_1 | 7.27 -         |
| chr1 | 3655988 | 3656097 | CSAR_peak_1 | 14.88,13.85 -  |
| chr1 | 3656137 | 3656207 | CSAR_peak_1 | 6.81 -         |
| chr1 | 3656251 | 3656287 | CSAR_peak_1 | 9.77 -         |
| chr1 | 3656372 | 3656401 | CSAR_peak_1 | 8.39 -         |
| chr1 | 3656484 | 3656583 | CSAR_peak_1 | 8.39,10.83 -   |
| chr1 | 3656666 | 3656724 | CSAR_peak_1 | 6.57 -         |

|      |         |         |            |                |   |
|------|---------|---------|------------|----------------|---|
| chr1 | 3656937 | 3657009 | CSAR_peak_ | 22.52,13.48    | - |
| chr1 | 3657096 | 3657209 | CSAR_peak_ | 25.62,23.89    | - |
| chr1 | 3657279 | 3657321 | CSAR_peak_ | 20.43,17.4     | - |
| chr1 | 3657545 | 3657591 | CSAR_peak_ | 9.58           | - |
| chr1 | 3657781 | 3657814 | CSAR_peak_ | 6.64           | - |
| chr1 | 3658051 | 3658098 | CSAR_peak_ | 9.35,7.89      | - |
| chr1 | 3658128 | 3658230 | CSAR_peak_ | 17.68,17.82,,- |   |
| chr1 | 3672502 | 3672556 | CSAR_peak_ | 6.21           | - |
| chr1 | 3696076 | 3696147 | CSAR_peak_ | 7.27           | - |
| chr1 | 3696479 | 3696493 | CSAR_peak_ | 7.27           | - |
| chr1 | 3696626 | 3696662 | CSAR_peak_ | 9.58           | - |
| chr1 | 3755754 | 3755831 | CSAR_peak_ | 25.07,9.58     | - |
| chr1 | 3755890 | 3755994 | CSAR_peak_ | 36.8,14.16     | - |
| chr1 | 3756018 | 3756271 | CSAR_peak_ | 24.17,26.99,,- |   |
| chr1 | 3756371 | 3756542 | CSAR_peak_ | 42.44,26.52,,- |   |
| chr1 | 3756544 | 3756770 | CSAR_peak_ | 15.71,28.65,,- |   |
| chr1 | 3756889 | 3756924 | CSAR_peak_ | 7.58           | - |
| chr1 | 3788533 | 3788618 | CSAR_peak_ | 7.27           | - |
| chr1 | 3798146 | 3798203 | CSAR_peak_ | 7.27           | - |
| chr1 | 3801234 | 3801307 | CSAR_peak_ | 9.58,7.34      | - |
| chr1 | 3801400 | 3801413 | CSAR_peak_ | 8.52           | - |
| chr1 | 3801541 | 3801602 | CSAR_peak_ | 8.92,14.88     | - |
| chr1 | 3802223 | 3802259 | CSAR_peak_ | 14.88          | - |
| chr1 | 3802338 | 3802428 | CSAR_peak_ | 26.69,10.02    | - |
| chr1 | 3802582 | 3802868 | CSAR_peak_ | 10.31,11.66,,- |   |
| chr1 | 3802911 | 3802973 | CSAR_peak_ | 12.59,21       | - |
| chr1 | 3803121 | 3803153 | CSAR_peak_ | 7.27           | - |
| chr1 | 3803197 | 3803248 | CSAR_peak_ | 6.1            | - |
| chr1 | 3813405 | 3813445 | CSAR_peak_ | 7.27           | - |
| chr1 | 3814737 | 3814778 | CSAR_peak_ | 8.39           | - |
| chr1 | 3815254 | 3815283 | CSAR_peak_ | 8.39           | - |
| chr1 | 3815387 | 3815420 | CSAR_peak_ | 7.27           | - |
| chr1 | 3815941 | 3816050 | CSAR_peak_ | 13.48,14.76    | - |
| chr1 | 3816096 | 3816242 | CSAR_peak_ | 7.27,7.27      | - |
| chr1 | 3816395 | 3816487 | CSAR_peak_ | 8.39,7.27      | - |
| chr1 | 3817704 | 3817776 | CSAR_peak_ | 6.21           | - |
| chr1 | 3818154 | 3818303 | CSAR_peak_ | 8.39,18.95,1,- |   |
| chr1 | 3818363 | 3818440 | CSAR_peak_ | 18.65,11.96    | - |
| chr1 | 3818753 | 3818819 | CSAR_peak_ | 19.36          | - |
| chr1 | 3819000 | 3819060 | CSAR_peak_ | 8.39,9.58,9.5- |   |
| chr1 | 3819119 | 3819194 | CSAR_peak_ | 10.02,12.13    | - |
| chr1 | 3819306 | 3819392 | CSAR_peak_ | 8.14,6.95,8.3- |   |

|      |         |         |             |                |   |
|------|---------|---------|-------------|----------------|---|
| chr1 | 3819469 | 3819582 | CSAR_peak_1 | 14.88,8.14,2.1 | - |
| chr1 | 3819678 | 3819826 | CSAR_peak_1 | 38.71,22.56    | - |
| chr1 | 3822164 | 3822238 | CSAR_peak_1 | 9.55,7.58,7.2  | - |
| chr1 | 3822386 | 3822437 | CSAR_peak_1 | 9.77           | - |
| chr1 | 3822582 | 3822632 | CSAR_peak_1 | 7.58           | - |
| chr1 | 3822718 | 3822781 | CSAR_peak_1 | 9.58,8.39      | - |
| chr1 | 3835793 | 3835867 | CSAR_peak_1 | 9.58,6.21      | - |
| chr1 | 3864613 | 3864681 | CSAR_peak_1 | 10.02,7.27     | - |
| chr1 | 3864716 | 3864790 | CSAR_peak_1 | 8.39           | - |
| chr1 | 3864953 | 3864995 | CSAR_peak_1 | 12.31          | - |
| chr1 | 3865105 | 3865171 | CSAR_peak_1 | 5.86           | - |
| chr1 | 3865256 | 3865342 | CSAR_peak_1 | 7.27           | - |
| chr1 | 3865422 | 3865435 | CSAR_peak_1 | 9.77,9.58      | - |
| chr1 | 3865529 | 3865620 | CSAR_peak_1 | 50.34,25.18    | - |
| chr1 | 3865764 | 3865827 | CSAR_peak_1 | 16.33,7.27     | - |
| chr1 | 3866249 | 3866294 | CSAR_peak_1 | 8.39           | - |
| chr1 | 3866354 | 3866428 | CSAR_peak_1 | 12.31          | - |
| chr1 | 3866728 | 3866807 | CSAR_peak_1 | 16.33          | - |
| chr1 | 3928187 | 3928352 | CSAR_peak_1 | 21.56,13.48,1  | - |
| chr1 | 3928531 | 3928575 | CSAR_peak_1 | 7.26,6.03      | - |
| chr1 | 3928591 | 3928605 | CSAR_peak_1 | 9.58           | - |
| chr1 | 3928704 | 3928753 | CSAR_peak_1 | 13,25.18       | - |
| chr1 | 3928763 | 3928980 | CSAR_peak_1 | 20.35,14.25,1  | - |
| chr1 | 3929007 | 3929066 | CSAR_peak_1 | 17.82,11.03    | - |
| chr1 | 3929099 | 3929341 | CSAR_peak_1 | 9.58,30.02,10  | - |
| chr1 | 3929437 | 3929506 | CSAR_peak_1 | 17.37,20.94    | - |
| chr1 | 3929825 | 3929896 | CSAR_peak_1 | 19.36,7.27     | - |
| chr1 | 3929971 | 3930025 | CSAR_peak_1 | 24.21,7.27     | - |
| chr1 | 3930037 | 3930103 | CSAR_peak_1 | 10.02,14.88    | - |
| chr1 | 3930224 | 3930258 | CSAR_peak_1 | 6.21           | - |
| chr1 | 3930276 | 3930465 | CSAR_peak_1 | 17.82,22.58,1  | - |
| chr1 | 3930597 | 3930652 | CSAR_peak_1 | 7.27           | - |
| chr1 | 3930656 | 3930727 | CSAR_peak_1 | 7.27           | - |
| chr1 | 3930777 | 3930934 | CSAR_peak_1 | 36.78,8.5,7.2  | - |
| chr1 | 3931163 | 3931420 | CSAR_peak_1 | 27.61,14.88,1  | - |
| chr1 | 4006867 | 4007025 | CSAR_peak_1 | 10.09,13.42,1  | - |
| chr1 | 4016889 | 4016946 | CSAR_peak_1 | 16.33          | - |
| chr1 | 4016983 | 4017110 | CSAR_peak_1 | 20.35,13.44    | - |
| chr1 | 4017112 | 4017214 | CSAR_peak_1 | 13.48          | - |
| chr1 | 4017327 | 4017345 | CSAR_peak_1 | 6.78           | - |
| chr1 | 4017386 | 4017434 | CSAR_peak_1 | 7              | - |
| chr1 | 4017469 | 4017519 | CSAR_peak_1 | 8.28           | - |

|      |         |         |             |                   |   |
|------|---------|---------|-------------|-------------------|---|
| chr1 | 4017533 | 4017572 | CSAR_peak_1 | 7.27              | - |
| chr1 | 4017575 | 4017589 | CSAR_peak_1 | 7.78,10.25        | - |
| chr1 | 4017686 | 4017784 | CSAR_peak_1 | 22.52,18.2        | - |
| chr1 | 4017828 | 4017875 | CSAR_peak_1 | 8.39              | - |
| chr1 | 4017960 | 4018025 | CSAR_peak_1 | 14.92,16.09       | - |
| chr1 | 4018125 | 4018239 | CSAR_peak_1 | 10.83,14.22,11.63 | - |
| chr1 | 4018330 | 4018412 | CSAR_peak_1 | 13.09,11.63       | - |
| chr1 | 4018497 | 4018576 | CSAR_peak_1 | 22.52,5.86,4.1    | - |
| chr1 | 4018653 | 4018718 | CSAR_peak_1 | 8.09,11.99        | - |
| chr1 | 4018744 | 4018778 | CSAR_peak_1 | 9.79              | - |
| chr1 | 4018793 | 4018822 | CSAR_peak_1 | 7.27              | - |
| chr1 | 4018843 | 4018883 | CSAR_peak_1 | 6.21              | - |
| chr1 | 4018899 | 4018977 | CSAR_peak_1 | 29.2,16.33        | - |
| chr1 | 4018983 | 4019018 | CSAR_peak_1 | 6.37,25.18        | - |
| chr1 | 4019102 | 4019197 | CSAR_peak_1 | 20.94,27.94       | - |
| chr1 | 4019261 | 4019340 | CSAR_peak_1 | 13.48,6.21        | - |
| chr1 | 4019382 | 4019422 | CSAR_peak_1 | 9.58              | - |
| chr1 | 4019531 | 4019599 | CSAR_peak_1 | 12.17,14.76       | - |
| chr1 | 4019639 | 4019723 | CSAR_peak_1 | 21.35,12.13       | - |
| chr1 | 4019840 | 4019889 | CSAR_peak_1 | 9.79,6.12         | - |
| chr1 | 4020648 | 4020714 | CSAR_peak_1 | 10.83             | - |
| chr1 | 4034669 | 4034726 | CSAR_peak_1 | 6.21              | - |
| chr1 | 4034807 | 4034822 | CSAR_peak_1 | 6.21              | - |
| chr1 | 4034926 | 4035013 | CSAR_peak_1 | 19.36,13.48       | - |
| chr1 | 4035030 | 4035064 | CSAR_peak_1 | 10.83             | - |
| chr1 | 4035128 | 4035252 | CSAR_peak_1 | 21.22,13.29       | - |
| chr1 | 4035284 | 4035328 | CSAR_peak_1 | 6.03,6.81,12.13   | - |
| chr1 | 4035442 | 4035515 | CSAR_peak_1 | 17.4,14.88        | - |
| chr1 | 4035804 | 4035972 | CSAR_peak_1 | 6.81,14.88,11.63  | - |
| chr1 | 4036035 | 4036118 | CSAR_peak_1 | 17.37,11.14       | - |
| chr1 | 4036212 | 4036255 | CSAR_peak_1 | 6.21              | - |
| chr1 | 4036266 | 4036316 | CSAR_peak_1 | 14.76             | - |
| chr1 | 4036458 | 4036525 | CSAR_peak_1 | 12.31             | - |
| chr1 | 4036657 | 4036725 | CSAR_peak_1 | 6.21,13.48        | - |
| chr1 | 4036728 | 4036796 | CSAR_peak_1 | 6.21              | - |
| chr1 | 4037379 | 4037436 | CSAR_peak_1 | 16.33             | - |
| chr1 | 4037759 | 4037944 | CSAR_peak_1 | 30.02,29.2,8.39   | - |
| chr1 | 4038066 | 4038294 | CSAR_peak_1 | 38.71,18.95       | - |
| chr1 | 4038326 | 4038395 | CSAR_peak_1 | 9.58,10.82        | - |
| chr1 | 4038606 | 4038711 | CSAR_peak_1 | 12.13,6.03,6.21   | - |
| chr1 | 4038883 | 4038946 | CSAR_peak_1 | 8.39              | - |
| chr1 | 4038982 | 4039071 | CSAR_peak_1 | 7.27              | - |

|      |         |         |              |                  |   |
|------|---------|---------|--------------|------------------|---|
| chr1 | 4039364 | 4039419 | CSAR_peak_1  | 12.13            | - |
| chr1 | 4039766 | 4039868 | CSAR_peak_2  | 24.21            | - |
| chr1 | 4039885 | 4039992 | CSAR_peak_3  | 26.37,27.34      | - |
| chr1 | 4040075 | 4040165 | CSAR_peak_4  | 11.17,15.32      | - |
| chr1 | 4040170 | 4040226 | CSAR_peak_5  | 8.39,6.21        | - |
| chr1 | 4040262 | 4040315 | CSAR_peak_6  | 30.81,11.63      | - |
| chr1 | 4040355 | 4040520 | CSAR_peak_7  | 24.21,35.83      | - |
| chr1 | 4040671 | 4040702 | CSAR_peak_8  | 9.77             | - |
| chr1 | 4040770 | 4040871 | CSAR_peak_9  | 11.66,13.48      | - |
| chr1 | 4040942 | 4041055 | CSAR_peak_10 | 14.76,27.64      | - |
| chr1 | 4041082 | 4041157 | CSAR_peak_11 | 14.88,13.84      | - |
| chr1 | 4041183 | 4041218 | CSAR_peak_12 | 7.29             | - |
| chr1 | 4041237 | 4041303 | CSAR_peak_13 | 8.65,7.34        | - |
| chr1 | 4041412 | 4041468 | CSAR_peak_14 | 10.83            | - |
| chr1 | 4041569 | 4041658 | CSAR_peak_15 | 12.89,17.68      | - |
| chr1 | 4041835 | 4042553 | CSAR_peak_16 | 51.16,9.55,51.16 | - |
| chr1 | 4042581 | 4042884 | CSAR_peak_17 | 33.38,54.36,(-   | - |
| chr1 | 4043090 | 4043175 | CSAR_peak_18 | 11.74,16.05      | - |
| chr1 | 4043176 | 4043307 | CSAR_peak_19 | 19.36            | - |
| chr1 | 4043415 | 4043474 | CSAR_peak_20 | 9.58,19.36       | - |
| chr1 | 4043546 | 4043610 | CSAR_peak_21 | 12.13            | - |
| chr1 | 4043773 | 4043836 | CSAR_peak_22 | 10.94,9.48,10.94 | - |
| chr1 | 4051328 | 4051390 | CSAR_peak_23 | 8.39             | - |
| chr1 | 4089905 | 4089963 | CSAR_peak_24 | 8.65,13.51       | - |
| chr1 | 4089997 | 4090074 | CSAR_peak_25 | 14.76,19.36      | - |
| chr1 | 4090287 | 4090413 | CSAR_peak_26 | 11.45,7.7,10.94  | - |
| chr1 | 4090489 | 4090529 | CSAR_peak_27 | 8.65             | - |
| chr1 | 4115139 | 4115210 | CSAR_peak_28 | 8.39,16.33       | - |
| chr1 | 4116034 | 4116098 | CSAR_peak_29 | 8.39,6.21        | - |
| chr1 | 4176032 | 4176077 | CSAR_peak_30 | 6.81             | - |
| chr1 | 4176824 | 4176879 | CSAR_peak_31 | 7.27,5.86        | - |
| chr1 | 4177406 | 4177461 | CSAR_peak_32 | 6.21,12.13       | - |
| chr1 | 4179483 | 4179534 | CSAR_peak_33 | 7.27             | - |
| chr1 | 4179767 | 4179835 | CSAR_peak_34 | 9.58             | - |
| chr1 | 4179887 | 4179973 | CSAR_peak_35 | 7.27             | - |
| chr1 | 4180518 | 4180584 | CSAR_peak_36 | 20.43,19.36      | - |
| chr1 | 4180918 | 4180994 | CSAR_peak_37 | 14.76,16.33      | - |
| chr1 | 4226978 | 4227009 | CSAR_peak_38 | 6.21             | - |
| chr1 | 4227116 | 4227156 | CSAR_peak_39 | 7.27             | - |
| chr1 | 4227616 | 4227671 | CSAR_peak_40 | 6.21             | - |
| chr1 | 4234661 | 4234734 | CSAR_peak_41 | 7.27             | - |
| chr1 | 4236128 | 4236178 | CSAR_peak_42 | 7.27             | - |



|      |         |         |            |                |   |
|------|---------|---------|------------|----------------|---|
| chr1 | 4241951 | 4242027 | CSAR_peak_ | 7.92,12.13     | - |
| chr1 | 4242798 | 4242837 | CSAR_peak_ | 8.39           | - |
| chr1 | 4263663 | 4263701 | CSAR_peak_ | 5.86           | - |
| chr1 | 4263708 | 4263849 | CSAR_peak_ | 13.48,6.21     | - |
| chr1 | 4263911 | 4263980 | CSAR_peak_ | 19.36          | - |
| chr1 | 4267403 | 4267544 | CSAR_peak_ | 16.08,10.83    | - |
| chr1 | 4267630 | 4267704 | CSAR_peak_ | 7.27,9.58      | - |
| chr1 | 4267732 | 4267782 | CSAR_peak_ | 9.77           | - |
| chr1 | 4268148 | 4268217 | CSAR_peak_ | 13.48          | - |
| chr1 | 4268375 | 4268424 | CSAR_peak_ | 6.81           | - |
| chr1 | 4268427 | 4268490 | CSAR_peak_ | 14.88,13.44    | - |
| chr1 | 4286556 | 4286590 | CSAR_peak_ | 7.27           | - |
| chr1 | 4286626 | 4286670 | CSAR_peak_ | 7.27           | - |
| chr1 | 4289136 | 4289179 | CSAR_peak_ | 9.58           | - |
| chr1 | 4289471 | 4289566 | CSAR_peak_ | 9.58,29.2      | - |
| chr1 | 4289701 | 4289757 | CSAR_peak_ | 6.21           | - |
| chr1 | 4290084 | 4290164 | CSAR_peak_ | 32.87,26.03    | - |
| chr1 | 4290197 | 4290402 | CSAR_peak_ | 34.93,67.11    | - |
| chr1 | 4290434 | 4290659 | CSAR_peak_ | 16.34,14.88,,- | - |
| chr1 | 4290662 | 4290766 | CSAR_peak_ | 23.76,12.78    | - |
| chr1 | 4290781 | 4290871 | CSAR_peak_ | 50.81,36.62    | - |
| chr1 | 4326997 | 4327036 | CSAR_peak_ | 9.58           | - |
| chr1 | 4327742 | 4327813 | CSAR_peak_ | 8.2,16.25,10.- | - |
| chr1 | 4327848 | 4327890 | CSAR_peak_ | 12.13          | - |
| chr1 | 4345809 | 4345848 | CSAR_peak_ | 8.39           | - |
| chr1 | 4346846 | 4346904 | CSAR_peak_ | 9.77,9.77      | - |
| chr1 | 4355208 | 4355257 | CSAR_peak_ | 7.27           | - |
| chr1 | 4356117 | 4356154 | CSAR_peak_ | 8.39           | - |
| chr1 | 4356292 | 4356384 | CSAR_peak_ | 24.35,11.17    | - |
| chr1 | 4356404 | 4356597 | CSAR_peak_ | 6.21,6.81,36.- | - |
| chr1 | 4356636 | 4356800 | CSAR_peak_ | 11.14,14.76,,- | - |
| chr1 | 4356854 | 4356946 | CSAR_peak_ | 8.65,19.98     | - |
| chr1 | 4357199 | 4357301 | CSAR_peak_ | 9.58,11.63     | - |
| chr1 | 4357307 | 4357357 | CSAR_peak_ | 5.86           | - |
| chr1 | 4357412 | 4357472 | CSAR_peak_ | 12.17,9.58     | - |
| chr1 | 4357640 | 4357699 | CSAR_peak_ | 10.31,20.43    | - |
| chr1 | 4357923 | 4357975 | CSAR_peak_ | 8.39,6.21,7.2- | - |
| chr1 | 4358039 | 4358128 | CSAR_peak_ | 8.65,29.14,1(- | - |
| chr1 | 4360243 | 4360286 | CSAR_peak_ | 6.22           | - |
| chr1 | 4360807 | 4360863 | CSAR_peak_ | 9.58           | - |
| chr1 | 4361153 | 4361237 | CSAR_peak_ | 7.27,7.27      | - |
| chr1 | 4361756 | 4361800 | CSAR_peak_ | 7.27           | - |

|      |         |         |            |                |   |
|------|---------|---------|------------|----------------|---|
| chr1 | 4362357 | 4362428 | CSAR_peak_ | 6.21,7.27      | - |
| chr1 | 4364137 | 4364201 | CSAR_peak_ | 13.48          | - |
| chr1 | 4364319 | 4364371 | CSAR_peak_ | 14.88          | - |
| chr1 | 4364397 | 4364500 | CSAR_peak_ | 8.39,6.21      | - |
| chr1 | 4364947 | 4365003 | CSAR_peak_ | 8.39           | - |
| chr1 | 4368965 | 4369052 | CSAR_peak_ | 8.2,9.58,12.1  | - |
| chr1 | 4370194 | 4370249 | CSAR_peak_ | 6.21           | - |
| chr1 | 4370441 | 4370532 | CSAR_peak_ | 8.39,9.58      | - |
| chr1 | 4392535 | 4392590 | CSAR_peak_ | 12.13,7.58     | - |
| chr1 | 4393425 | 4393469 | CSAR_peak_ | 19.36          | - |
| chr1 | 4403133 | 4403207 | CSAR_peak_ | 7.27           | - |
| chr1 | 4403968 | 4404019 | CSAR_peak_ | 9.58,8.65      | - |
| chr1 | 4404608 | 4404635 | CSAR_peak_ | 6.21           | - |
| chr1 | 4436488 | 4436504 | CSAR_peak_ | 5.86           | - |
| chr1 | 4436559 | 4436629 | CSAR_peak_ | 5.86,6.57      | - |
| chr1 | 4436885 | 4436948 | CSAR_peak_ | 9.58           | - |
| chr1 | 4437290 | 4437337 | CSAR_peak_ | 7.27           | - |
| chr1 | 4437432 | 4437522 | CSAR_peak_ | 9.58,9.58      | - |
| chr1 | 4437648 | 4437724 | CSAR_peak_ | 6.45,42.64     | - |
| chr1 | 4438038 | 4438074 | CSAR_peak_ | 6.21           | - |
| chr1 | 4438527 | 4438563 | CSAR_peak_ | 6.21           | - |
| chr1 | 4438662 | 4438749 | CSAR_peak_ | 10.83,7.78     | - |
| chr1 | 4441543 | 4441609 | CSAR_peak_ | 12.59,14.76    | - |
| chr1 | 4442331 | 4442425 | CSAR_peak_ | 12.59,16.33,-  | - |
| chr1 | 4442533 | 4442640 | CSAR_peak_ | 9.58,17.82     | - |
| chr1 | 4490984 | 4491036 | CSAR_peak_ | 7.27           | - |
| chr1 | 4501920 | 4501969 | CSAR_peak_ | 6.03           | - |
| chr1 | 4502174 | 4502227 | CSAR_peak_ | 7.92           | - |
| chr1 | 4509309 | 4509373 | CSAR_peak_ | 6.21,12.13     | - |
| chr1 | 4509812 | 4509861 | CSAR_peak_ | 7.58           | - |
| chr1 | 4510287 | 4510324 | CSAR_peak_ | 9.58           | - |
| chr1 | 4510426 | 4510566 | CSAR_peak_ | 16.08,9.32,9.- | - |
| chr1 | 4510610 | 4510670 | CSAR_peak_ | 7.27,5.86,9.7- | - |
| chr1 | 4510757 | 4510801 | CSAR_peak_ | 10.02          | - |
| chr1 | 4510811 | 4510866 | CSAR_peak_ | 13.51          | - |
| chr1 | 4510911 | 4511019 | CSAR_peak_ | 17.35,18.73    | - |
| chr1 | 4511126 | 4511232 | CSAR_peak_ | 10.96,7.27     | - |
| chr1 | 4511292 | 4511609 | CSAR_peak_ | 12.59,18.95,-  | - |
| chr1 | 4511675 | 4511761 | CSAR_peak_ | 6.01,22.52,6.- | - |
| chr1 | 4511775 | 4511786 | CSAR_peak_ | 6.21           | - |
| chr1 | 4511871 | 4511920 | CSAR_peak_ | 12.13,17.82    | - |
| chr1 | 4512136 | 4512289 | CSAR_peak_ | 14.88,13.48,-  | - |

|      |         |         |             |                |   |
|------|---------|---------|-------------|----------------|---|
| chr1 | 4512630 | 4512749 | CSAR_peak_1 | 11.38,8.39     | - |
| chr1 | 4512847 | 4512919 | CSAR_peak_1 | 17.82          | - |
| chr1 | 4513064 | 4513155 | CSAR_peak_1 | 6.21           | - |
| chr1 | 4513250 | 4513297 | CSAR_peak_1 | 20.94,7.06     | - |
| chr1 | 4513377 | 4513419 | CSAR_peak_1 | 16.19,19.36    | - |
| chr1 | 4513743 | 4513801 | CSAR_peak_1 | 12.13,17.82    | - |
| chr1 | 4525558 | 4525624 | CSAR_peak_1 | 7.27           | - |
| chr1 | 4525681 | 4525762 | CSAR_peak_1 | 11.14,11.96    | - |
| chr1 | 4525940 | 4525995 | CSAR_peak_1 | 17.82          | - |
| chr1 | 4562900 | 4562954 | CSAR_peak_1 | 7.58           | - |
| chr1 | 4564600 | 4564660 | CSAR_peak_1 | 14.88,12.13    | - |
| chr1 | 4565304 | 4565359 | CSAR_peak_1 | 12.13          | - |
| chr1 | 4566002 | 4566052 | CSAR_peak_1 | 6.21           | - |
| chr1 | 4567144 | 4567187 | CSAR_peak_1 | 5.86           | - |
| chr1 | 4570380 | 4570443 | CSAR_peak_1 | 7.58           | - |
| chr1 | 4572670 | 4572747 | CSAR_peak_1 | 11.38          | - |
| chr1 | 4572869 | 4572912 | CSAR_peak_1 | 7.27           | - |
| chr1 | 4573310 | 4573386 | CSAR_peak_1 | 9.58           | - |
| chr1 | 4573631 | 4573715 | CSAR_peak_1 | 11.66,13.92    | - |
| chr1 | 4573785 | 4573788 | CSAR_peak_1 | 8.39           | - |
| chr1 | 4573960 | 4574021 | CSAR_peak_1 | 19.98,21.24    | - |
| chr1 | 4574676 | 4574751 | CSAR_peak_1 | 6.94           | - |
| chr1 | 4575151 | 4575306 | CSAR_peak_1 | 10.83,5.86,7.- | - |
| chr1 | 4575408 | 4575475 | CSAR_peak_1 | 13.37,6.21     | - |
| chr1 | 4575507 | 4575547 | CSAR_peak_1 | 8.65           | - |
| chr1 | 4575549 | 4575611 | CSAR_peak_1 | 15.68          | - |
| chr1 | 4575737 | 4575841 | CSAR_peak_1 | 6.21,5.62      | - |
| chr1 | 4576243 | 4576313 | CSAR_peak_1 | 12.6,19.36     | - |
| chr1 | 4576588 | 4576624 | CSAR_peak_1 | 7.27,8.39      | - |
| chr1 | 4577339 | 4577478 | CSAR_peak_1 | 14.88,12.74    | - |
| chr1 | 4577665 | 4577739 | CSAR_peak_1 | 10.95,6.21     | - |
| chr1 | 4577762 | 4577835 | CSAR_peak_1 | 24.21,7.58     | - |
| chr1 | 4592562 | 4592601 | CSAR_peak_1 | 9.77           | - |
| chr1 | 4592676 | 4592740 | CSAR_peak_1 | 12.13          | - |
| chr1 | 4592838 | 4592915 | CSAR_peak_1 | 7.27           | - |
| chr1 | 4593028 | 4593065 | CSAR_peak_1 | 6.21           | - |
| chr1 | 4593245 | 4593492 | CSAR_peak_1 | 15.68,7.92,6.- | - |
| chr1 | 4593500 | 4593600 | CSAR_peak_1 | 10.83          | - |
| chr1 | 4608379 | 4608423 | CSAR_peak_1 | 14.34          | - |
| chr1 | 4608560 | 4608598 | CSAR_peak_1 | 6.57           | - |
| chr1 | 4608691 | 4608794 | CSAR_peak_1 | 11.08,12.92    | - |
| chr1 | 4608863 | 4608953 | CSAR_peak_1 | 13.29,6.28     | - |

|      |         |         |             |                 |   |
|------|---------|---------|-------------|-----------------|---|
| chr1 | 4609469 | 4609524 | CSAR_peak_1 | 7.27            | - |
| chr1 | 4609669 | 4609715 | CSAR_peak_1 | 10.02           | - |
| chr1 | 4609726 | 4609769 | CSAR_peak_1 | 12.74,14.85     | - |
| chr1 | 4609860 | 4609976 | CSAR_peak_1 | 9.32,10.31,2.0  | - |
| chr1 | 4610185 | 4610304 | CSAR_peak_1 | 16.49           | - |
| chr1 | 4610368 | 4610398 | CSAR_peak_1 | 16.77           | - |
| chr1 | 4613003 | 4613073 | CSAR_peak_1 | 6.21            | - |
| chr1 | 4614627 | 4614678 | CSAR_peak_1 | 6.21            | - |
| chr1 | 4633772 | 4634055 | CSAR_peak_1 | 26.69,6.81,8.0  | - |
| chr1 | 4634922 | 4634955 | CSAR_peak_1 | 7.27            | - |
| chr1 | 4635094 | 4635169 | CSAR_peak_1 | 7.58            | - |
| chr1 | 4635524 | 4635727 | CSAR_peak_1 | 17.82,10.83,1.0 | - |
| chr1 | 4635752 | 4635850 | CSAR_peak_1 | 8.14,14.88      | - |
| chr1 | 4636048 | 4636114 | CSAR_peak_1 | 14.88           | - |
| chr1 | 4636376 | 4636430 | CSAR_peak_1 | 9.58,6.21       | - |
| chr1 | 4637081 | 4637422 | CSAR_peak_1 | 24.33,17.35,1.0 | - |
| chr1 | 4637680 | 4637718 | CSAR_peak_1 | 9.58            | - |
| chr1 | 4637873 | 4637922 | CSAR_peak_1 | 10.95           | - |
| chr1 | 4637980 | 4638043 | CSAR_peak_1 | 34.89           | - |
| chr1 | 4638248 | 4638362 | CSAR_peak_1 | 37.42,33.03     | - |
| chr1 | 4638550 | 4638621 | CSAR_peak_1 | 7.27,7.27       | - |
| chr1 | 4638668 | 4639030 | CSAR_peak_1 | 45.77,15.9,2.0  | - |
| chr1 | 4639113 | 4639177 | CSAR_peak_1 | 19.96,12.13     | - |
| chr1 | 4639257 | 4639316 | CSAR_peak_1 | 12.6,16.33,6.0  | - |
| chr1 | 4639394 | 4639667 | CSAR_peak_1 | 41.52,27.38,1.0 | - |
| chr1 | 4639746 | 4639820 | CSAR_peak_1 | 14.34,7.27      | - |
| chr1 | 4639837 | 4640019 | CSAR_peak_1 | 8.9,31.2,27.1   | - |
| chr1 | 4640040 | 4640116 | CSAR_peak_1 | 21.35,21.37     | - |
| chr1 | 4640196 | 4640274 | CSAR_peak_1 | 24.72,12.13     | - |
| chr1 | 4640335 | 4640379 | CSAR_peak_1 | 6.21,5.86       | - |
| chr1 | 4640417 | 4640516 | CSAR_peak_1 | 7.7,20.54       | - |
| chr1 | 4640594 | 4640755 | CSAR_peak_1 | 21,6.02,16.8    | - |
| chr1 | 4640773 | 4640868 | CSAR_peak_1 | 28.04,6.61,9.0  | - |
| chr1 | 4640880 | 4640989 | CSAR_peak_1 | 19.28,12.95,1.0 | - |
| chr1 | 4641076 | 4641147 | CSAR_peak_1 | 7.26,6.21,7.5   | - |
| chr1 | 4641161 | 4641231 | CSAR_peak_1 | 8.14,7.27       | - |
| chr1 | 4641297 | 4641398 | CSAR_peak_1 | 6.03,12.59,1.0  | - |
| chr1 | 4641419 | 4641452 | CSAR_peak_1 | 19.36           | - |
| chr1 | 4641472 | 4641542 | CSAR_peak_1 | 8.28,13.51      | - |
| chr1 | 4641551 | 4641809 | CSAR_peak_1 | 31.2,44.86      | - |
| chr1 | 4641884 | 4642002 | CSAR_peak_1 | 7.27,40.95,5.0  | - |
| chr1 | 4695287 | 4695345 | CSAR_peak_1 | 13.48           | - |

|      |         |         |             |                |   |
|------|---------|---------|-------------|----------------|---|
| chr1 | 4695514 | 4695648 | CSAR_peak_1 | 17.4,14.76     | - |
| chr1 | 4833716 | 4833929 | CSAR_peak_1 | 23.03,12.17    | - |
| chr1 | 4834019 | 4834064 | CSAR_peak_1 | 12.13,7.27     | - |
| chr1 | 4834090 | 4834131 | CSAR_peak_1 | 7.58           | - |
| chr1 | 4834160 | 4834240 | CSAR_peak_1 | 9.77,9.58      | - |
| chr1 | 4834301 | 4834356 | CSAR_peak_1 | 13.6,6.1       | - |
| chr1 | 4834475 | 4834576 | CSAR_peak_1 | 7.73,21.56,6.- | - |
| chr1 | 4834599 | 4834705 | CSAR_peak_1 | 18.61,17.51    | - |
| chr1 | 4834733 | 4834846 | CSAR_peak_1 | 18.1,26.64     | - |
| chr1 | 4835014 | 4835058 | CSAR_peak_1 | 9.58,14.88     | - |
| chr1 | 4876366 | 4876468 | CSAR_peak_1 | 7.27,7.27      | - |
| chr1 | 4876713 | 4876768 | CSAR_peak_1 | 9.58           | - |
| chr1 | 4890997 | 4891044 | CSAR_peak_1 | 8.39           | - |
| chr1 | 4924391 | 4924444 | CSAR_peak_1 | 7.27           | - |
| chr1 | 4924614 | 4924703 | CSAR_peak_1 | 12.17,12.17    | - |
| chr1 | 4927291 | 4927313 | CSAR_peak_1 | 7.27           | - |
| chr1 | 4927348 | 4927387 | CSAR_peak_1 | 7.27           | - |
| chr1 | 4927729 | 4927804 | CSAR_peak_1 | 9.58,16.33     | - |
| chr1 | 4927890 | 4927927 | CSAR_peak_1 | 14.34,14.08    | - |
| chr1 | 4928003 | 4928078 | CSAR_peak_1 | 22.52,31.72    | - |
| chr1 | 4928186 | 4928236 | CSAR_peak_1 | 7.27           | - |
| chr1 | 4969423 | 4969549 | CSAR_peak_1 | 6.03,8.53,7.3- | - |
| chr1 | 4969792 | 4969819 | CSAR_peak_1 | 12.13,5.86     | - |
| chr1 | 4972702 | 4972774 | CSAR_peak_1 | 6.21           | - |
| chr1 | 4972849 | 4972876 | CSAR_peak_1 | 7.27           | - |
| chr1 | 4973169 | 4973232 | CSAR_peak_1 | 6.21           | - |
| chr1 | 5008810 | 5008845 | CSAR_peak_1 | 9.58           | - |
| chr1 | 5008865 | 5008928 | CSAR_peak_1 | 14.88          | - |
| chr1 | 5009838 | 5009901 | CSAR_peak_1 | 9.58           | - |
| chr1 | 5010596 | 5010635 | CSAR_peak_1 | 9.58           | - |
| chr1 | 5010917 | 5011028 | CSAR_peak_1 | 12.17,9.58     | - |
| chr1 | 5011512 | 5011559 | CSAR_peak_1 | 7.27           | - |
| chr1 | 5012108 | 5012150 | CSAR_peak_1 | 8.39           | - |
| chr1 | 5012352 | 5012403 | CSAR_peak_1 | 7.27,6.21,6.5- | - |
| chr1 | 5012514 | 5012601 | CSAR_peak_1 | 9.48,8.52,5.8- | - |
| chr1 | 5012732 | 5012816 | CSAR_peak_1 | 6.21,12.13     | - |
| chr1 | 5013360 | 5013421 | CSAR_peak_1 | 6.57           | - |
| chr1 | 5013435 | 5013467 | CSAR_peak_1 | 8.39           | - |
| chr1 | 5013593 | 5013650 | CSAR_peak_1 | 12.17,8.14     | - |
| chr1 | 5051918 | 5052013 | CSAR_peak_1 | 10.83          | - |
| chr1 | 5052181 | 5052389 | CSAR_peak_1 | 14.88,6.03,6.- | - |
| chr1 | 5052518 | 5052573 | CSAR_peak_1 | 7.27           | - |

|      |         |         |            |                |   |
|------|---------|---------|------------|----------------|---|
| chr1 | 5052667 | 5052726 | CSAR_peak_ | 10.95          | - |
| chr1 | 5052821 | 5052910 | CSAR_peak_ | 8.52,8.61      | - |
| chr1 | 5052947 | 5052975 | CSAR_peak_ | 8.14           | - |
| chr1 | 5052976 | 5053067 | CSAR_peak_ | 10.83,7.27,9.- | - |
| chr1 | 5053272 | 5053338 | CSAR_peak_ | 7.26           | - |
| chr1 | 5053869 | 5053934 | CSAR_peak_ | 9.58,14.88     | - |
| chr1 | 5054025 | 5054079 | CSAR_peak_ | 9.58           | - |
| chr1 | 5054128 | 5054173 | CSAR_peak_ | 7.27,8.39      | - |
| chr1 | 5054586 | 5054607 | CSAR_peak_ | 6.03           | - |
| chr1 | 5062226 | 5062269 | CSAR_peak_ | 7.27           | - |
| chr1 | 5063258 | 5063332 | CSAR_peak_ | 7.27           | - |
| chr1 | 5063834 | 5063914 | CSAR_peak_ | 13.44,6.03     | - |
| chr1 | 5064196 | 5064262 | CSAR_peak_ | 19.36          | - |
| chr1 | 5066710 | 5066810 | CSAR_peak_ | 10.83          | - |
| chr1 | 5067249 | 5067319 | CSAR_peak_ | 20.94          | - |
| chr1 | 5067395 | 5067428 | CSAR_peak_ | 6.21           | - |
| chr1 | 5067511 | 5067600 | CSAR_peak_ | 6.21,7.27      | - |
| chr1 | 5067624 | 5067675 | CSAR_peak_ | 9.58           | - |
| chr1 | 5067843 | 5067899 | CSAR_peak_ | 18.08          | - |
| chr1 | 5067934 | 5067991 | CSAR_peak_ | 25.33,21.94    | - |
| chr1 | 5068218 | 5068327 | CSAR_peak_ | 5.86,8.28      | - |
| chr1 | 5075432 | 5075552 | CSAR_peak_ | 17.82,14.08    | - |
| chr1 | 5075563 | 5075617 | CSAR_peak_ | 6.44,6.03      | - |
| chr1 | 5075649 | 5075691 | CSAR_peak_ | 6.21           | - |
| chr1 | 5075697 | 5075801 | CSAR_peak_ | 16.08          | - |
| chr1 | 5075825 | 5075933 | CSAR_peak_ | 17.82,13.48,-  | - |
| chr1 | 5076113 | 5076153 | CSAR_peak_ | 8.28           | - |
| chr1 | 5076204 | 5076411 | CSAR_peak_ | 12.13,8.65,9.- | - |
| chr1 | 5076469 | 5076520 | CSAR_peak_ | 6.21           | - |
| chr1 | 5077454 | 5077510 | CSAR_peak_ | 9.58           | - |
| chr1 | 5102847 | 5102893 | CSAR_peak_ | 11.38          | - |
| chr1 | 5103537 | 5103583 | CSAR_peak_ | 8.14           | - |
| chr1 | 5107740 | 5107832 | CSAR_peak_ | 7.27,7         | - |
| chr1 | 5108471 | 5108527 | CSAR_peak_ | 7.27           | - |
| chr1 | 5108813 | 5108847 | CSAR_peak_ | 12.13          | - |
| chr1 | 5109161 | 5109202 | CSAR_peak_ | 6.52           | - |
| chr1 | 5109317 | 5109392 | CSAR_peak_ | 13.6,7,11.38   | - |
| chr1 | 5109821 | 5109867 | CSAR_peak_ | 10.83          | - |
| chr1 | 5109869 | 5109886 | CSAR_peak_ | 8.28           | - |
| chr1 | 5109977 | 5110014 | CSAR_peak_ | 7.27,10.83     | - |
| chr1 | 5110215 | 5110277 | CSAR_peak_ | 8.39           | - |
| chr1 | 5110829 | 5110937 | CSAR_peak_ | 12.13,7.73     | - |

|      |         |         |            |               |   |
|------|---------|---------|------------|---------------|---|
| chr1 | 5111156 | 5111244 | CSAR_peak_ | 13.48         | - |
| chr1 | 5111339 | 5111411 | CSAR_peak_ | 9.58,5.86     | - |
| chr1 | 5114984 | 5115005 | CSAR_peak_ | 9.58          | - |
| chr1 | 5115110 | 5115152 | CSAR_peak_ | 20.94         | - |
| chr1 | 5128642 | 5128729 | CSAR_peak_ | 12.23,7.58,8. | - |
| chr1 | 5128794 | 5128906 | CSAR_peak_ | 33.03,16.19   | - |
| chr1 | 5128945 | 5129050 | CSAR_peak_ | 18.1          | - |
| chr1 | 5129069 | 5129179 | CSAR_peak_ | 45.02,5.62,4( | - |
| chr1 | 5142335 | 5142391 | CSAR_peak_ | 7.58          | - |
| chr1 | 5142561 | 5142609 | CSAR_peak_ | 6.21          | - |
| chr1 | 5143525 | 5143574 | CSAR_peak_ | 6.21          | - |
| chr1 | 5167654 | 5167703 | CSAR_peak_ | 8.39          | - |
| chr1 | 5170320 | 5170349 | CSAR_peak_ | 8.41          | - |
| chr1 | 5170367 | 5170425 | CSAR_peak_ | 15.32,20.76   | - |
| chr1 | 5175141 | 5175205 | CSAR_peak_ | 9.58          | - |
| chr1 | 5177614 | 5177676 | CSAR_peak_ | 13.48         | - |
| chr1 | 5178077 | 5178128 | CSAR_peak_ | 10.83         | - |
| chr1 | 5178717 | 5178829 | CSAR_peak_ | 7.92,7.27     | - |
| chr1 | 5179039 | 5179138 | CSAR_peak_ | 7.27          | - |
| chr1 | 5179168 | 5179253 | CSAR_peak_ | 10.83         | - |
| chr1 | 5179320 | 5179387 | CSAR_peak_ | 9.58,8.39     | - |
| chr1 | 5179598 | 5179662 | CSAR_peak_ | 8.13,7.27     | - |
| chr1 | 5179801 | 5179879 | CSAR_peak_ | 24.21,16.33   | - |
| chr1 | 5180067 | 5180143 | CSAR_peak_ | 7.27,10.94    | - |
| chr1 | 5180277 | 5180354 | CSAR_peak_ | 26.69,24.21   | - |
| chr1 | 5180395 | 5180493 | CSAR_peak_ | 12.13         | - |
| chr1 | 5180704 | 5180920 | CSAR_peak_ | 27.64,6.1,33. | - |
| chr1 | 5180978 | 5181010 | CSAR_peak_ | 7.58          | - |
| chr1 | 5184234 | 5184295 | CSAR_peak_ | 9.77          | - |
| chr1 | 5205762 | 5205824 | CSAR_peak_ | 7.27          | - |
| chr1 | 5205866 | 5205901 | CSAR_peak_ | 6.21          | - |
| chr1 | 5206886 | 5206935 | CSAR_peak_ | 6.44          | - |
| chr1 | 5207507 | 5207520 | CSAR_peak_ | 6.44          | - |
| chr1 | 5207618 | 5207662 | CSAR_peak_ | 16.08         | - |
| chr1 | 5207663 | 5207687 | CSAR_peak_ | 7.27          | - |
| chr1 | 5207781 | 5207848 | CSAR_peak_ | 10.02,19.36   | - |
| chr1 | 5208229 | 5208276 | CSAR_peak_ | 7.27          | - |
| chr1 | 5208515 | 5208556 | CSAR_peak_ | 7.27          | - |
| chr1 | 5209268 | 5209341 | CSAR_peak_ | 18.73         | - |
| chr1 | 5210546 | 5210595 | CSAR_peak_ | 14.88,12.17   | - |
| chr1 | 5211005 | 5211055 | CSAR_peak_ | 6.21          | - |
| chr1 | 5228526 | 5228618 | CSAR_peak_ | 5.86,6.21     | - |

|      |         |         |            |                |   |
|------|---------|---------|------------|----------------|---|
| chr1 | 5228636 | 5228929 | CSAR_peak_ | 30.97          | - |
| chr1 | 5228967 | 5229146 | CSAR_peak_ | 12.59,12.61,   | - |
| chr1 | 5229409 | 5229465 | CSAR_peak_ | 12.13          | - |
| chr1 | 5229564 | 5229617 | CSAR_peak_ | 6.85,7.27      | - |
| chr1 | 5229979 | 5230051 | CSAR_peak_ | 17.35,10.02,   | - |
| chr1 | 5230172 | 5230289 | CSAR_peak_ | 17.4,6.95,8.6- |   |
| chr1 | 5230374 | 5230542 | CSAR_peak_ | 7.06,9.61,16.- |   |
| chr1 | 5230829 | 5230861 | CSAR_peak_ | 7.27           | - |
| chr1 | 5230940 | 5230974 | CSAR_peak_ | 10.31          | - |
| chr1 | 5231037 | 5231047 | CSAR_peak_ | 6.21           | - |
| chr1 | 5232744 | 5232859 | CSAR_peak_ | 12.13          | - |
| chr1 | 5233223 | 5233290 | CSAR_peak_ | 7.92           | - |
| chr1 | 5233355 | 5233432 | CSAR_peak_ | 7.27           | - |
| chr1 | 5233687 | 5233734 | CSAR_peak_ | 24.21          | - |
| chr1 | 5233848 | 5233894 | CSAR_peak_ | 6.03           | - |
| chr1 | 5233928 | 5233992 | CSAR_peak_ | 9.27,7.58      | - |
| chr1 | 5234080 | 5234122 | CSAR_peak_ | 10.83          | - |
| chr1 | 5234580 | 5234634 | CSAR_peak_ | 9.58           | - |
| chr1 | 5235360 | 5235379 | CSAR_peak_ | 6.03           | - |
| chr1 | 5235387 | 5235450 | CSAR_peak_ | 13.48          | - |
| chr1 | 5235615 | 5235656 | CSAR_peak_ | 10.83          | - |
| chr1 | 5235783 | 5235829 | CSAR_peak_ | 7.27           | - |
| chr1 | 5249264 | 5249300 | CSAR_peak_ | 5.86           | - |
| chr1 | 5250361 | 5250408 | CSAR_peak_ | 9.58           | - |
| chr1 | 5250520 | 5250580 | CSAR_peak_ | 19.36          | - |
| chr1 | 5251456 | 5251499 | CSAR_peak_ | 10.31,14.76    | - |
| chr1 | 5251845 | 5251901 | CSAR_peak_ | 20.94,17.37    | - |
| chr1 | 5251999 | 5252048 | CSAR_peak_ | 9.58           | - |
| chr1 | 5257391 | 5257449 | CSAR_peak_ | 5.86           | - |
| chr1 | 5257459 | 5257536 | CSAR_peak_ | 6.02,18.65     | - |
| chr1 | 5257724 | 5257781 | CSAR_peak_ | 7.27           | - |
| chr1 | 5257978 | 5258048 | CSAR_peak_ | 9.58           | - |
| chr1 | 5258574 | 5258714 | CSAR_peak_ | 12.13          | - |
| chr1 | 5259090 | 5259136 | CSAR_peak_ | 7.92           | - |
| chr1 | 5259498 | 5259550 | CSAR_peak_ | 16.33          | - |
| chr1 | 5259726 | 5259794 | CSAR_peak_ | 9.77           | - |
| chr1 | 5260077 | 5260119 | CSAR_peak_ | 6.44,5.95      | - |
| chr1 | 5260456 | 5260463 | CSAR_peak_ | 6.03           | - |
| chr1 | 5260549 | 5260639 | CSAR_peak_ | 7.58,8.39      | - |
| chr1 | 5260926 | 5260982 | CSAR_peak_ | 6.81           | - |
| chr1 | 5261883 | 5261997 | CSAR_peak_ | 14.88,6.03     | - |
| chr1 | 5262580 | 5262637 | CSAR_peak_ | 24.21,10.83    | - |



|      |         |         |            |                   |   |
|------|---------|---------|------------|-------------------|---|
| chr1 | 5262945 | 5263024 | CSAR_peak_ | 17.82,16.11       | - |
| chr1 | 5263057 | 5263107 | CSAR_peak_ | 16.33,9.58        | - |
| chr1 | 5263242 | 5263330 | CSAR_peak_ | 8.39              | - |
| chr1 | 5263803 | 5263834 | CSAR_peak_ | 6.21              | - |
| chr1 | 5264701 | 5264743 | CSAR_peak_ | 12.13             | - |
| chr1 | 5264914 | 5264921 | CSAR_peak_ | 7.27              | - |
| chr1 | 5275786 | 5275852 | CSAR_peak_ | 10.95,10.83       | - |
| chr1 | 5275982 | 5276057 | CSAR_peak_ | 5.86,12.13,11.14  | - |
| chr1 | 5276068 | 5276329 | CSAR_peak_ | 27.64,12.74,11.14 | - |
| chr1 | 5276354 | 5276701 | CSAR_peak_ | 13.48,9.27,11.14  | - |
| chr1 | 5276887 | 5276961 | CSAR_peak_ | 11.14,10.33       | - |
| chr1 | 5277474 | 5277528 | CSAR_peak_ | 6.57,12.13        | - |
| chr1 | 5278459 | 5278548 | CSAR_peak_ | 12.17             | - |
| chr1 | 5279048 | 5279120 | CSAR_peak_ | 17.82,11.38       | - |
| chr1 | 5279349 | 5279434 | CSAR_peak_ | 10.83             | - |
| chr1 | 5297947 | 5298090 | CSAR_peak_ | 289.92,49.35      | - |
| chr1 | 5301942 | 5301980 | CSAR_peak_ | 7.27              | - |
| chr1 | 5408031 | 5408082 | CSAR_peak_ | 10.31             | - |
| chr1 | 5408501 | 5408593 | CSAR_peak_ | 10.62             | - |
| chr1 | 5408688 | 5408739 | CSAR_peak_ | 13.48             | - |
| chr1 | 5408903 | 5408960 | CSAR_peak_ | 14.88             | - |
| chr1 | 5409200 | 5409299 | CSAR_peak_ | 13.48             | - |
| chr1 | 5409459 | 5409496 | CSAR_peak_ | 8.13              | - |
| chr1 | 5415442 | 5415534 | CSAR_peak_ | 12.13             | - |
| chr1 | 5415579 | 5415605 | CSAR_peak_ | 8.39,6.21         | - |
| chr1 | 5415677 | 5415739 | CSAR_peak_ | 10.83             | - |
| chr1 | 5415808 | 5415835 | CSAR_peak_ | 5.86              | - |
| chr1 | 5415945 | 5415997 | CSAR_peak_ | 10.83             | - |
| chr1 | 5416249 | 5416272 | CSAR_peak_ | 6.21              | - |
| chr1 | 5416353 | 5416376 | CSAR_peak_ | 6.95              | - |
| chr1 | 5416528 | 5416533 | CSAR_peak_ | 7.27              | - |
| chr1 | 5416594 | 5416697 | CSAR_peak_ | 7.29,6.45,12.13   | - |
| chr1 | 5416706 | 5416717 | CSAR_peak_ | 9.77              | - |
| chr1 | 5416808 | 5416856 | CSAR_peak_ | 34.16,10.96       | - |
| chr1 | 5416877 | 5416955 | CSAR_peak_ | 14.85,11.96       | - |
| chr1 | 5417031 | 5417076 | CSAR_peak_ | 10.83,12.6        | - |
| chr1 | 5417216 | 5417339 | CSAR_peak_ | 13.48,12.13       | - |
| chr1 | 5417439 | 5417507 | CSAR_peak_ | 8.65,9.61         | - |
| chr1 | 5417630 | 5417664 | CSAR_peak_ | 7.58              | - |
| chr1 | 5417694 | 5417782 | CSAR_peak_ | 10.95,12.31       | - |
| chr1 | 5418159 | 5418268 | CSAR_peak_ | 17.82,8.65        | - |
| chr1 | 5418298 | 5418378 | CSAR_peak_ | 13.92,16.77       | - |

|      |         |         |            |                   |   |
|------|---------|---------|------------|-------------------|---|
| chr1 | 5418459 | 5418519 | CSAR_peak_ | 13.48             | - |
| chr1 | 5418531 | 5418569 | CSAR_peak_ | 11.38             | - |
| chr1 | 5418661 | 5418699 | CSAR_peak_ | 12.31             | - |
| chr1 | 5419237 | 5419299 | CSAR_peak_ | 12.31             | - |
| chr1 | 5419386 | 5419415 | CSAR_peak_ | 12.13             | - |
| chr1 | 5419512 | 5419577 | CSAR_peak_ | 26.69             | - |
| chr1 | 5419592 | 5419653 | CSAR_peak_ | 7.27              | - |
| chr1 | 5419782 | 5419833 | CSAR_peak_ | 6.12,12.35        | - |
| chr1 | 5419857 | 5419896 | CSAR_peak_ | 14.88,7.27        | - |
| chr1 | 5420000 | 5420019 | CSAR_peak_ | 8.39              | - |
| chr1 | 5420286 | 5420322 | CSAR_peak_ | 7.27              | - |
| chr1 | 5420379 | 5420453 | CSAR_peak_ | 12.17,8.39        | - |
| chr1 | 5420837 | 5420844 | CSAR_peak_ | 7.27              | - |
| chr1 | 5430463 | 5430560 | CSAR_peak_ | 6.21              | - |
| chr1 | 5431196 | 5431230 | CSAR_peak_ | 6.21,8.39         | - |
| chr1 | 5431621 | 5431670 | CSAR_peak_ | 7.27              | - |
| chr1 | 5431822 | 5431872 | CSAR_peak_ | 12.13             | - |
| chr1 | 5433428 | 5433498 | CSAR_peak_ | 10.83             | - |
| chr1 | 5433624 | 5433688 | CSAR_peak_ | 9.77,5.86         | - |
| chr1 | 5443249 | 5443286 | CSAR_peak_ | 12.13             | - |
| chr1 | 5446648 | 5446682 | CSAR_peak_ | 6.21              | - |
| chr1 | 5446707 | 5446751 | CSAR_peak_ | 12.13             | - |
| chr1 | 5446766 | 5446968 | CSAR_peak_ | 23.03,10.66,10.83 | - |
| chr1 | 5447051 | 5447126 | CSAR_peak_ | 13.51,10.25       | - |
| chr1 | 5447128 | 5447184 | CSAR_peak_ | 23.03             | - |
| chr1 | 5447203 | 5447315 | CSAR_peak_ | 10.83,6.81,10.83  | - |
| chr1 | 5447442 | 5447449 | CSAR_peak_ | 5.86              | - |
| chr1 | 5447450 | 5447620 | CSAR_peak_ | 12.31,10.83,10.83 | - |
| chr1 | 5447646 | 5447700 | CSAR_peak_ | 10.02             | - |
| chr1 | 5459208 | 5459330 | CSAR_peak_ | 7.58,12.13,10.83  | - |
| chr1 | 5460063 | 5460126 | CSAR_peak_ | 12.13             | - |
| chr1 | 5460645 | 5460783 | CSAR_peak_ | 8.39,6.21         | - |
| chr1 | 5495948 | 5496074 | CSAR_peak_ | 17.35             | - |
| chr1 | 5496246 | 5496323 | CSAR_peak_ | 6.44,14.76        | - |
| chr1 | 5496826 | 5496868 | CSAR_peak_ | 6.21              | - |
| chr1 | 5496871 | 5496930 | CSAR_peak_ | 7.27              | - |
| chr1 | 5497250 | 5497322 | CSAR_peak_ | 14.63,8.39        | - |
| chr1 | 5497394 | 5497455 | CSAR_peak_ | 12.13,6.57        | - |
| chr1 | 5546318 | 5546349 | CSAR_peak_ | 8.39              | - |
| chr1 | 5547184 | 5547242 | CSAR_peak_ | 7                 | - |
| chr1 | 5555696 | 5555734 | CSAR_peak_ | 13,8.09           | - |
| chr1 | 5555825 | 5555954 | CSAR_peak_ | 10.02,26.05       | - |

|      |         |         |            |               |   |
|------|---------|---------|------------|---------------|---|
| chr1 | 5556015 | 5556043 | CSAR_peak_ | 17.51         | - |
| chr1 | 5556126 | 5556176 | CSAR_peak_ | 13.48         | - |
| chr1 | 5556224 | 5556353 | CSAR_peak_ | 12.13,10.31,  | - |
| chr1 | 5556641 | 5556737 | CSAR_peak_ | 6.03          | - |
| chr1 | 5620038 | 5620119 | CSAR_peak_ | 7.92,6.45     | - |
| chr1 | 5620167 | 5620216 | CSAR_peak_ | 9.58          | - |
| chr1 | 5620352 | 5620394 | CSAR_peak_ | 10.94,14.88   | - |
| chr1 | 5620507 | 5620538 | CSAR_peak_ | 10.02,10.83   | - |
| chr1 | 5620815 | 5620974 | CSAR_peak_ | 7.27,12.13    | - |
| chr1 | 5621133 | 5621190 | CSAR_peak_ | 9.77          | - |
| chr1 | 5621722 | 5621753 | CSAR_peak_ | 6.21          | - |
| chr1 | 5621871 | 5621891 | CSAR_peak_ | 6.21          | - |
| chr1 | 5621941 | 5621995 | CSAR_peak_ | 7.27          | - |
| chr1 | 5622040 | 5622051 | CSAR_peak_ | 8.39          | - |
| chr1 | 5622469 | 5622556 | CSAR_peak_ | 6.81,10.83,14 | - |
| chr1 | 5677466 | 5677524 | CSAR_peak_ | 8.65          | - |
| chr1 | 5677892 | 5677934 | CSAR_peak_ | 6.21,8.39     | - |
| chr1 | 5686093 | 5686182 | CSAR_peak_ | 69.33,57.11,  | - |
| chr1 | 5742443 | 5742479 | CSAR_peak_ | 5.86          | - |
| chr1 | 5742680 | 5742739 | CSAR_peak_ | 9.77          | - |
| chr1 | 5762802 | 5762937 | CSAR_peak_ | 25.07,10.94   | - |
| chr1 | 5763093 | 5763180 | CSAR_peak_ | 10.02         | - |
| chr1 | 5763199 | 5763302 | CSAR_peak_ | 9.58,38.71,3  | - |
| chr1 | 5763628 | 5763712 | CSAR_peak_ | 25.07         | - |
| chr1 | 5763733 | 5763799 | CSAR_peak_ | 14.76         | - |
| chr1 | 5765072 | 5765141 | CSAR_peak_ | 14.22         | - |
| chr1 | 5765171 | 5765282 | CSAR_peak_ | 6.03,9.13,16. | - |
| chr1 | 5765317 | 5765358 | CSAR_peak_ | 7.27,5.86     | - |
| chr1 | 5765387 | 5765439 | CSAR_peak_ | 9.58,8.65     | - |
| chr1 | 5776534 | 5776596 | CSAR_peak_ | 8.13,8.52     | - |
| chr1 | 5776663 | 5776785 | CSAR_peak_ | 13.92,9.41,1  | - |
| chr1 | 5776893 | 5776981 | CSAR_peak_ | 18.35,7.71    | - |
| chr1 | 5777079 | 5777121 | CSAR_peak_ | 9.77,17.82    | - |
| chr1 | 5777219 | 5777277 | CSAR_peak_ | 17.82         | - |
| chr1 | 5777884 | 5777939 | CSAR_peak_ | 12.31         | - |
| chr1 | 5778062 | 5778104 | CSAR_peak_ | 9.25,6.57     | - |
| chr1 | 5778272 | 5778366 | CSAR_peak_ | 13.48,22.52,  | - |
| chr1 | 5803779 | 5803834 | CSAR_peak_ | 9.77          | - |
| chr1 | 5841029 | 5841079 | CSAR_peak_ | 9.58          | - |
| chr1 | 5841332 | 5841382 | CSAR_peak_ | 6.21          | - |
| chr1 | 5841465 | 5841543 | CSAR_peak_ | 7.27,8.65     | - |
| chr1 | 5843921 | 5843975 | CSAR_peak_ | 16.92,15.71,  | - |

|      |         |         |             |                  |   |
|------|---------|---------|-------------|------------------|---|
| chr1 | 5845430 | 5845513 | CSAR_peak_1 | 12.17            | - |
| chr1 | 5845796 | 5845906 | CSAR_peak_1 | 33.31,16.08      | - |
| chr1 | 5845945 | 5846089 | CSAR_peak_1 | 16.33,14.76      | - |
| chr1 | 5846110 | 5846179 | CSAR_peak_1 | 9.58             | - |
| chr1 | 5846202 | 5846310 | CSAR_peak_1 | 14.88            | - |
| chr1 | 5846330 | 5846363 | CSAR_peak_1 | 14.88            | - |
| chr1 | 5846449 | 5846495 | CSAR_peak_1 | 14.88            | - |
| chr1 | 5846966 | 5846990 | CSAR_peak_1 | 8.09             | - |
| chr1 | 5847070 | 5847128 | CSAR_peak_1 | 17.88,22.69      | - |
| chr1 | 5847335 | 5847388 | CSAR_peak_1 | 21.22            | - |
| chr1 | 5847598 | 5847620 | CSAR_peak_1 | 9.58             | - |
| chr1 | 5847646 | 5847725 | CSAR_peak_1 | 14.88,12.17      | - |
| chr1 | 5848031 | 5848088 | CSAR_peak_1 | 8.28,19.36       | - |
| chr1 | 5848204 | 5848340 | CSAR_peak_1 | 18.65,32.46      | - |
| chr1 | 5848419 | 5848522 | CSAR_peak_1 | 19.36            | - |
| chr1 | 5848603 | 5848655 | CSAR_peak_1 | 8.39             | - |
| chr1 | 5848767 | 5848781 | CSAR_peak_1 | 8.39             | - |
| chr1 | 5848906 | 5848948 | CSAR_peak_1 | 6.21             | - |
| chr1 | 5849171 | 5849207 | CSAR_peak_1 | 6.21             | - |
| chr1 | 5849441 | 5849475 | CSAR_peak_1 | 7.27             | - |
| chr1 | 5849592 | 5849750 | CSAR_peak_1 | 9.58,16.33       | - |
| chr1 | 5849891 | 5850002 | CSAR_peak_1 | 24.21,9.58       | - |
| chr1 | 5857186 | 5857331 | CSAR_peak_1 | 10.95,7.27       | - |
| chr1 | 5857383 | 5857428 | CSAR_peak_1 | 6.03             | - |
| chr1 | 5857523 | 5857587 | CSAR_peak_1 | 9.77,9.58        | - |
| chr1 | 5860357 | 5860468 | CSAR_peak_1 | 9.58,10.18       | - |
| chr1 | 5860608 | 5860690 | CSAR_peak_1 | 14.76,10.17      | - |
| chr1 | 5860772 | 5860815 | CSAR_peak_1 | 15.96,9.77       | - |
| chr1 | 5860880 | 5860933 | CSAR_peak_1 | 8.39             | - |
| chr1 | 5861001 | 5861066 | CSAR_peak_1 | 13.48,6.21       | - |
| chr1 | 5861336 | 5861375 | CSAR_peak_1 | 7.27,5.62        | - |
| chr1 | 5861408 | 5861487 | CSAR_peak_1 | 12.13,6.95       | - |
| chr1 | 5861585 | 5861639 | CSAR_peak_1 | 16.19,16.34      | - |
| chr1 | 5861645 | 5861662 | CSAR_peak_1 | 12.13            | - |
| chr1 | 5861758 | 5861798 | CSAR_peak_1 | 8.65             | - |
| chr1 | 5863694 | 5863910 | CSAR_peak_1 | 6.81,13.48,19.36 | - |
| chr1 | 5879448 | 5879536 | CSAR_peak_1 | 13.48,6.21       | - |
| chr1 | 5881343 | 5881450 | CSAR_peak_1 | 8.39,6.21        | - |
| chr1 | 5881826 | 5881901 | CSAR_peak_1 | 13.48            | - |
| chr1 | 5882341 | 5882407 | CSAR_peak_1 | 6.21             | - |
| chr1 | 5917367 | 5917402 | CSAR_peak_1 | 7.27             | - |
| chr1 | 5917617 | 5917663 | CSAR_peak_1 | 7.27             | - |

|      |         |         |              |                   |   |
|------|---------|---------|--------------|-------------------|---|
| chr1 | 5951938 | 5952007 | CSAR_peak_1  | 8.28,8.28         | - |
| chr1 | 5952282 | 5952385 | CSAR_peak_2  | 9.58,19.36        | - |
| chr1 | 5952475 | 5952561 | CSAR_peak_3  | 23.95,19.36       | - |
| chr1 | 5952668 | 5952756 | CSAR_peak_4  | 5.71,32.77,11.35  | - |
| chr1 | 5952919 | 5953064 | CSAR_peak_5  | 13.48,8.52,11.35  | - |
| chr1 | 5953068 | 5953275 | CSAR_peak_6  | 6.03,31.2,6.2     | - |
| chr1 | 5953277 | 5953291 | CSAR_peak_7  | 9.58,12.13        | - |
| chr1 | 5953378 | 5953641 | CSAR_peak_8  | 9.58,5.86,7.2     | - |
| chr1 | 5953740 | 5953792 | CSAR_peak_9  | 16.87,11.63,11.35 | - |
| chr1 | 5953811 | 5953873 | CSAR_peak_10 | 11.35             | - |
| chr1 | 5954585 | 5954636 | CSAR_peak_11 | 19.36,13.48       | - |
| chr1 | 5954796 | 5954942 | CSAR_peak_12 | 38.71,12.17       | - |
| chr1 | 5955131 | 5955204 | CSAR_peak_13 | 9.61,7.27         | - |
| chr1 | 5955311 | 5955489 | CSAR_peak_14 | 24.21,40.66       | - |
| chr1 | 5955591 | 5955643 | CSAR_peak_15 | 12.13,9.58        | - |
| chr1 | 5955670 | 5955736 | CSAR_peak_16 | 9.79,8.65         | - |
| chr1 | 5955749 | 5955912 | CSAR_peak_17 | 20.17,16.08       | - |
| chr1 | 5956053 | 5956588 | CSAR_peak_18 | 21.35,32.17,11.35 | - |
| chr1 | 5956647 | 5956714 | CSAR_peak_19 | 17.82,17.82       | - |
| chr1 | 5956893 | 5957085 | CSAR_peak_20 | 20.43,46.78,11.35 | - |
| chr1 | 5984855 | 5984896 | CSAR_peak_21 | 7.27              | - |
| chr1 | 5985018 | 5985078 | CSAR_peak_22 | 12.13             | - |
| chr1 | 5985467 | 5985517 | CSAR_peak_23 | 7.27              | - |
| chr1 | 5985832 | 5985920 | CSAR_peak_24 | 8.39,7.27         | - |
| chr1 | 5986543 | 5986680 | CSAR_peak_25 | 16.19             | - |
| chr1 | 6025103 | 6025170 | CSAR_peak_26 | 7.58              | - |
| chr1 | 6025281 | 6025359 | CSAR_peak_27 | 6.21,8.39         | - |
| chr1 | 6025530 | 6025588 | CSAR_peak_28 | 8.39              | - |
| chr1 | 6084867 | 6084944 | CSAR_peak_29 | 7.27              | - |
| chr1 | 6093719 | 6093729 | CSAR_peak_30 | 7.27              | - |
| chr1 | 6093763 | 6093831 | CSAR_peak_31 | 16.33,6.03        | - |
| chr1 | 6094168 | 6094236 | CSAR_peak_32 | 8.61,6.85         | - |
| chr1 | 6094338 | 6094416 | CSAR_peak_33 | 12.72,6.12        | - |
| chr1 | 6094687 | 6094756 | CSAR_peak_34 | 11.66             | - |
| chr1 | 6094862 | 6094887 | CSAR_peak_35 | 6.1               | - |
| chr1 | 6094896 | 6094922 | CSAR_peak_36 | 9.58              | - |
| chr1 | 6096352 | 6096390 | CSAR_peak_37 | 8.39              | - |
| chr1 | 6096641 | 6096652 | CSAR_peak_38 | 8.39              | - |
| chr1 | 6096873 | 6096958 | CSAR_peak_39 | 12.13             | - |
| chr1 | 6097026 | 6097130 | CSAR_peak_40 | 16.33,6.21,11.35  | - |
| chr1 | 6097960 | 6098017 | CSAR_peak_41 | 6.95,8.39         | - |
| chr1 | 6098169 | 6098222 | CSAR_peak_42 | 9.58              | - |

|      |         |         |            |                |   |
|------|---------|---------|------------|----------------|---|
| chr1 | 6113452 | 6113497 | CSAR_peak_ | 7.27           | - |
| chr1 | 6114829 | 6114889 | CSAR_peak_ | 6.57           | - |
| chr1 | 6116223 | 6116276 | CSAR_peak_ | 19.36          | - |
| chr1 | 6132943 | 6132986 | CSAR_peak_ | 6.21           | - |
| chr1 | 6151680 | 6151818 | CSAR_peak_ | 13.48,9.58     | - |
| chr1 | 6151832 | 6151886 | CSAR_peak_ | 9.58           | - |
| chr1 | 6153359 | 6153426 | CSAR_peak_ | 9.58           | - |
| chr1 | 6153866 | 6153893 | CSAR_peak_ | 6.21           | - |
| chr1 | 6171789 | 6171937 | CSAR_peak_ | 24.21,16.33    | - |
| chr1 | 6172015 | 6172057 | CSAR_peak_ | 8.39,6.21      | - |
| chr1 | 6182859 | 6182907 | CSAR_peak_ | 8.39           | - |
| chr1 | 6187759 | 6187794 | CSAR_peak_ | 7.27,7.27      | - |
| chr1 | 6187880 | 6187928 | CSAR_peak_ | 10.02,8.13     | - |
| chr1 | 6188254 | 6188319 | CSAR_peak_ | 9.58           | - |
| chr1 | 6188340 | 6188470 | CSAR_peak_ | 14.08,9.58     | - |
| chr1 | 6188642 | 6188694 | CSAR_peak_ | 10.83          | - |
| chr1 | 6188701 | 6188756 | CSAR_peak_ | 6.21           | - |
| chr1 | 6188859 | 6188879 | CSAR_peak_ | 7.27           | - |
| chr1 | 6188969 | 6189040 | CSAR_peak_ | 12.13,7.58     | - |
| chr1 | 6189068 | 6189174 | CSAR_peak_ | 25.91,33.03    | - |
| chr1 | 6189211 | 6189276 | CSAR_peak_ | 9.27,19.36     | - |
| chr1 | 6189492 | 6189557 | CSAR_peak_ | 13.51,8.13     | - |
| chr1 | 6189624 | 6189698 | CSAR_peak_ | 23.03,20.43    | - |
| chr1 | 6189795 | 6189909 | CSAR_peak_ | 14.88,7.92     | - |
| chr1 | 6189976 | 6190023 | CSAR_peak_ | 7.27           | - |
| chr1 | 6190249 | 6190351 | CSAR_peak_ | 23.03,26.91    | - |
| chr1 | 6190435 | 6190508 | CSAR_peak_ | 17.82,18.73    | - |
| chr1 | 6190785 | 6190859 | CSAR_peak_ | 14.88,7.58     | - |
| chr1 | 6190900 | 6191171 | CSAR_peak_ | 13.48,12.13,(- | - |
| chr1 | 6191179 | 6191213 | CSAR_peak_ | 7.27           | - |
| chr1 | 6191317 | 6191496 | CSAR_peak_ | 11.63,14.52,(- | - |
| chr1 | 6191542 | 6191682 | CSAR_peak_ | 27.94,37.55    | - |
| chr1 | 6192168 | 6192271 | CSAR_peak_ | 9.58,8.39      | - |
| chr1 | 6192274 | 6192324 | CSAR_peak_ | 11.38          | - |
| chr1 | 6192404 | 6192513 | CSAR_peak_ | 9.77,14.76     | - |
| chr1 | 6192656 | 6192813 | CSAR_peak_ | 18.73,14.85    | - |
| chr1 | 6192816 | 6192879 | CSAR_peak_ | 20.43,16.33    | - |
| chr1 | 6193102 | 6193153 | CSAR_peak_ | 6.44           | - |
| chr1 | 6193162 | 6193223 | CSAR_peak_ | 7.27           | - |
| chr1 | 6193318 | 6193360 | CSAR_peak_ | 8.39,7.27      | - |
| chr1 | 6193394 | 6193499 | CSAR_peak_ | 10.02,8.95,1(- | - |
| chr1 | 6193749 | 6193798 | CSAR_peak_ | 8.39           | - |

|      |         |         |            |                   |   |
|------|---------|---------|------------|-------------------|---|
| chr1 | 6193841 | 6193929 | CSAR_peak_ | 9.58,14.88        | - |
| chr1 | 6193955 | 6194041 | CSAR_peak_ | 20.43,14.88       | - |
| chr1 | 6213469 | 6213547 | CSAR_peak_ | 20.94,6.21        | - |
| chr1 | 6213890 | 6214005 | CSAR_peak_ | 25.62,10.33,10.33 | - |
| chr1 | 6214024 | 6214080 | CSAR_peak_ | 17.37             | - |
| chr1 | 6214214 | 6214295 | CSAR_peak_ | 15,11.45          | - |
| chr1 | 6214378 | 6214415 | CSAR_peak_ | 20.94,17.82       | - |
| chr1 | 6214623 | 6214716 | CSAR_peak_ | 6.02,8.65         | - |
| chr1 | 6214803 | 6214895 | CSAR_peak_ | 7.27,8.39,10.33   | - |
| chr1 | 6215018 | 6215066 | CSAR_peak_ | 7.27,5.86,8.21    | - |
| chr1 | 6215111 | 6215167 | CSAR_peak_ | 14.59,8.12        | - |
| chr1 | 6215239 | 6215289 | CSAR_peak_ | 6.85,7.26         | - |
| chr1 | 6215315 | 6215421 | CSAR_peak_ | 9.77,12.13,10.33  | - |
| chr1 | 6215827 | 6215892 | CSAR_peak_ | 38.23,32.27       | - |
| chr1 | 6215979 | 6216056 | CSAR_peak_ | 14.08,9.03,9.03   | - |
| chr1 | 6216114 | 6216134 | CSAR_peak_ | 19.98             | - |
| chr1 | 6216227 | 6216239 | CSAR_peak_ | 9.41              | - |
| chr1 | 6216270 | 6216300 | CSAR_peak_ | 7.92              | - |
| chr1 | 6216415 | 6216482 | CSAR_peak_ | 12.6              | - |
| chr1 | 6216731 | 6216856 | CSAR_peak_ | 13.48,14.22,10.33 | - |
| chr1 | 6217081 | 6217125 | CSAR_peak_ | 9.58              | - |
| chr1 | 6217144 | 6217186 | CSAR_peak_ | 8.14              | - |
| chr1 | 6217453 | 6217504 | CSAR_peak_ | 15.2,9.72         | - |
| chr1 | 6217580 | 6217655 | CSAR_peak_ | 7.95,20.35,10.33  | - |
| chr1 | 6217736 | 6217779 | CSAR_peak_ | 10.02,9.58        | - |
| chr1 | 6245314 | 6245368 | CSAR_peak_ | 8.39              | - |
| chr1 | 6246016 | 6246097 | CSAR_peak_ | 12.13,7.27        | - |
| chr1 | 6246466 | 6246538 | CSAR_peak_ | 6.21              | - |
| chr1 | 6246997 | 6247072 | CSAR_peak_ | 9.58              | - |
| chr1 | 6247642 | 6247728 | CSAR_peak_ | 8.14,7.58         | - |
| chr1 | 6258276 | 6258326 | CSAR_peak_ | 6.21              | - |
| chr1 | 6258415 | 6258463 | CSAR_peak_ | 9.58              | - |
| chr1 | 6258581 | 6258678 | CSAR_peak_ | 13.32,8.92        | - |
| chr1 | 6258812 | 6258847 | CSAR_peak_ | 9.58              | - |
| chr1 | 6258857 | 6258893 | CSAR_peak_ | 6.21              | - |
| chr1 | 6259478 | 6259554 | CSAR_peak_ | 12.13             | - |
| chr1 | 6259650 | 6259761 | CSAR_peak_ | 13.48,10.83       | - |
| chr1 | 6259868 | 6259999 | CSAR_peak_ | 10.95,22.56       | - |
| chr1 | 6260379 | 6260426 | CSAR_peak_ | 7.27              | - |
| chr1 | 6260481 | 6260548 | CSAR_peak_ | 12.31             | - |
| chr1 | 6265181 | 6265220 | CSAR_peak_ | 6.21              | - |
| chr1 | 6265235 | 6265300 | CSAR_peak_ | 13.51,19.18       | - |

|      |         |         |            |                |   |
|------|---------|---------|------------|----------------|---|
| chr1 | 6265465 | 6265540 | CSAR_peak_ | 29.3,28.22     | - |
| chr1 | 6265560 | 6265750 | CSAR_peak_ | 72.59,30.82    | - |
| chr1 | 6265752 | 6265979 | CSAR_peak_ | 20.54,23.49,;- |   |
| chr1 | 6266034 | 6266571 | CSAR_peak_ | 64.53,73.62,;- |   |
| chr1 | 6266573 | 6266688 | CSAR_peak_ | 18.9,22.7,17.- |   |
| chr1 | 6266993 | 6267145 | CSAR_peak_ | 23.03,12.13    | - |
| chr1 | 6267184 | 6267378 | CSAR_peak_ | 35.38,33.97    | - |
| chr1 | 6267405 | 6267513 | CSAR_peak_ | 26.43,17.37    | - |
| chr1 | 6267523 | 6267668 | CSAR_peak_ | 39.15,33.03    | - |
| chr1 | 6267736 | 6267968 | CSAR_peak_ | 40.44,32.07    | - |
| chr1 | 6268017 | 6268061 | CSAR_peak_ | 9.58           | - |
| chr1 | 6268093 | 6268157 | CSAR_peak_ | 9.58,7.27      | - |
| chr1 | 6268208 | 6268302 | CSAR_peak_ | 74,54.82       | - |
| chr1 | 6268316 | 6268463 | CSAR_peak_ | 17.15,11.32,;- |   |
| chr1 | 6268468 | 6268509 | CSAR_peak_ | 6.03           | - |
| chr1 | 6268544 | 6268781 | CSAR_peak_ | 29.43,50.58    | - |
| chr1 | 6278493 | 6278570 | CSAR_peak_ | 9.58           | - |
| chr1 | 6279249 | 6279287 | CSAR_peak_ | 9.58           | - |
| chr1 | 6279391 | 6279430 | CSAR_peak_ | 6.21,13.48     | - |
| chr1 | 6279767 | 6279800 | CSAR_peak_ | 7.92           | - |
| chr1 | 6279887 | 6279982 | CSAR_peak_ | 12.5           | - |
| chr1 | 6279984 | 6280028 | CSAR_peak_ | 24.21          | - |
| chr1 | 6280597 | 6280652 | CSAR_peak_ | 16.33,17.82    | - |
| chr1 | 6280710 | 6280834 | CSAR_peak_ | 12.13,10.31    | - |
| chr1 | 6280908 | 6280966 | CSAR_peak_ | 9.77,10.83     | - |
| chr1 | 6281021 | 6281119 | CSAR_peak_ | 8.39,6.21      | - |
| chr1 | 6281146 | 6281231 | CSAR_peak_ | 14.88,12.13    | - |
| chr1 | 6281242 | 6281343 | CSAR_peak_ | 8.39,8.28      | - |
| chr1 | 6282402 | 6282519 | CSAR_peak_ | 16.19,12.59,;- |   |
| chr1 | 6282525 | 6282578 | CSAR_peak_ | 12.13,8.95     | - |
| chr1 | 6282591 | 6282645 | CSAR_peak_ | 16.11,16.19    | - |
| chr1 | 6282656 | 6282768 | CSAR_peak_ | 9.41,12.17,6.- |   |
| chr1 | 6282886 | 6282945 | CSAR_peak_ | 13.48,7.27     | - |
| chr1 | 6283613 | 6283777 | CSAR_peak_ | 20.43,14.25,;- |   |
| chr1 | 6283783 | 6284113 | CSAR_peak_ | 18.73,40.72,;- |   |
| chr1 | 6284132 | 6284260 | CSAR_peak_ | 16.23,35.83,;- |   |
| chr1 | 6284322 | 6284439 | CSAR_peak_ | 6.45,27.11,1(- |   |
| chr1 | 6284503 | 6284541 | CSAR_peak_ | 6.03,10.83     | - |
| chr1 | 6284618 | 6284801 | CSAR_peak_ | 25.18,10.88    | - |
| chr1 | 6284836 | 6284949 | CSAR_peak_ | 20.94,6.81,7.- |   |
| chr1 | 6284973 | 6285044 | CSAR_peak_ | 13.48,7.27,8.- |   |
| chr1 | 6285101 | 6285219 | CSAR_peak_ | 9.15,6.45,11.- |   |



|      |         |         |                           |
|------|---------|---------|---------------------------|
| chr1 | 6285277 | 6285384 | CSAR_peak_18.52,9.43,16.- |
| chr1 | 6285447 | 6285524 | CSAR_peak_18.2,9.61,6.02- |
| chr1 | 6285531 | 6285614 | CSAR_peak_19.72,10.83 -   |
| chr1 | 6285729 | 6285771 | CSAR_peak_17.78,12.6 -    |
| chr1 | 6285779 | 6285923 | CSAR_peak_130.02,5.86,34- |
| chr1 | 6285924 | 6286066 | CSAR_peak_130.93,5.91,34- |
| chr1 | 6286117 | 6286217 | CSAR_peak_132.76,35.31 -  |
| chr1 | 6286288 | 6286387 | CSAR_peak_139.27,38.1 -   |
| chr1 | 6286442 | 6286509 | CSAR_peak_123.95,33.31 -  |
| chr1 | 6286591 | 6286670 | CSAR_peak_112.17,9.72 -   |
| chr1 | 6286694 | 6286785 | CSAR_peak_18.39 -         |
| chr1 | 6286798 | 6286918 | CSAR_peak_16.78,22.56,14- |
| chr1 | 6287005 | 6287019 | CSAR_peak_18.39 -         |
| chr1 | 6287021 | 6287078 | CSAR_peak_114.85,10.83 -  |
| chr1 | 6287182 | 6287258 | CSAR_peak_119.35,10.47 -  |
| chr1 | 6287485 | 6287550 | CSAR_peak_123.2 -         |
| chr1 | 6287668 | 6287770 | CSAR_peak_127.61,21.94 -  |
| chr1 | 6287782 | 6288120 | CSAR_peak_129.14,28.62 -  |
| chr1 | 6288234 | 6288278 | CSAR_peak_16.57 -         |
| chr1 | 6288349 | 6288376 | CSAR_peak_111.38 -        |
| chr1 | 6288658 | 6288722 | CSAR_peak_125.3,17.37 -   |
| chr1 | 6288768 | 6288850 | CSAR_peak_118.95,16.23 -  |
| chr1 | 6289088 | 6289155 | CSAR_peak_17,21.56 -      |
| chr1 | 6289186 | 6289245 | CSAR_peak_116.34,10.94 -  |
| chr1 | 6289251 | 6289307 | CSAR_peak_17.27 -         |
| chr1 | 6289310 | 6289349 | CSAR_peak_18.39 -         |
| chr1 | 6289363 | 6289399 | CSAR_peak_112.6,5.79 -    |
| chr1 | 6289482 | 6289530 | CSAR_peak_114.25,13.66 -  |
| chr1 | 6289673 | 6289681 | CSAR_peak_16.72 -         |
| chr1 | 6289865 | 6289909 | CSAR_peak_111.63 -        |
| chr1 | 6289926 | 6289946 | CSAR_peak_19.58 -         |
| chr1 | 6289987 | 6290140 | CSAR_peak_113.29,28.93,-  |
| chr1 | 6290175 | 6290345 | CSAR_peak_130.75,25.94 -  |
| chr1 | 6290497 | 6290565 | CSAR_peak_18.39,10.83 -   |
| chr1 | 6290615 | 6290711 | CSAR_peak_110.95,13.44 -  |
| chr1 | 6290719 | 6290992 | CSAR_peak_142.87,27.94,-  |
| chr1 | 6291073 | 6291120 | CSAR_peak_19.58,8.39 -    |
| chr1 | 6291163 | 6291203 | CSAR_peak_17.27 -         |
| chr1 | 6291208 | 6291252 | CSAR_peak_112.13,9.58 -   |
| chr1 | 6291266 | 6291359 | CSAR_peak_112.13,7.27 -   |
| chr1 | 6291466 | 6291582 | CSAR_peak_120.13,13.66 -  |
| chr1 | 6291765 | 6291848 | CSAR_peak_18.39 -         |

|      |         |         |            |                |   |
|------|---------|---------|------------|----------------|---|
| chr1 | 6291925 | 6291971 | CSAR_peak_ | 6.03           | - |
| chr1 | 6292018 | 6292063 | CSAR_peak_ | 5.82,7.43      | - |
| chr1 | 6292306 | 6292385 | CSAR_peak_ | 16.08,22.52    | - |
| chr1 | 6292445 | 6292503 | CSAR_peak_ | 14.76          | - |
| chr1 | 6292630 | 6292707 | CSAR_peak_ | 17.51,27.11,;- | - |
| chr1 | 6292773 | 6292937 | CSAR_peak_ | 27.17,47.49,;- | - |
| chr1 | 6292977 | 6293061 | CSAR_peak_ | 14.88,7.34     | - |
| chr1 | 6293293 | 6293378 | CSAR_peak_ | 40.88,42.97    | - |
| chr1 | 6293673 | 6293716 | CSAR_peak_ | 25.3,21.74     | - |
| chr1 | 6293781 | 6293841 | CSAR_peak_ | 12.74,21.56    | - |
| chr1 | 6307810 | 6307851 | CSAR_peak_ | 7.27           | - |
| chr1 | 6309211 | 6309281 | CSAR_peak_ | 9.58           | - |
| chr1 | 6311225 | 6311295 | CSAR_peak_ | 6.21           | - |
| chr1 | 6353566 | 6353637 | CSAR_peak_ | 6.21,12.13     | - |
| chr1 | 6354776 | 6354819 | CSAR_peak_ | 8.39           | - |
| chr1 | 6355330 | 6355433 | CSAR_peak_ | 14.88,8.65     | - |
| chr1 | 6355869 | 6355922 | CSAR_peak_ | 6.95           | - |
| chr1 | 6356069 | 6356114 | CSAR_peak_ | 8.39           | - |
| chr1 | 6356215 | 6356274 | CSAR_peak_ | 8.28,12.13     | - |
| chr1 | 6356343 | 6356486 | CSAR_peak_ | 13.85,20.44,;- | - |
| chr1 | 6356567 | 6356647 | CSAR_peak_ | 13.48,9.58     | - |
| chr1 | 6356659 | 6356729 | CSAR_peak_ | 25.18          | - |
| chr1 | 6356855 | 6356942 | CSAR_peak_ | 5.86,9.58,8.9- | - |
| chr1 | 6357080 | 6357154 | CSAR_peak_ | 7,8.13,10.62   | - |
| chr1 | 6357203 | 6357262 | CSAR_peak_ | 7.06,11.96     | - |
| chr1 | 6357289 | 6357332 | CSAR_peak_ | 12.74          | - |
| chr1 | 6357386 | 6357522 | CSAR_peak_ | 8.2,9.58,6.03- | - |
| chr1 | 6357575 | 6357684 | CSAR_peak_ | 9.77,9.58,6.8- | - |
| chr1 | 6357851 | 6357899 | CSAR_peak_ | 10.02          | - |
| chr1 | 6357921 | 6357935 | CSAR_peak_ | 8.39           | - |
| chr1 | 6358046 | 6358110 | CSAR_peak_ | 17.37,10.83    | - |
| chr1 | 6358232 | 6358327 | CSAR_peak_ | 16.36,12.13,;- | - |
| chr1 | 6358421 | 6358470 | CSAR_peak_ | 6.44,13.48     | - |
| chr1 | 6358626 | 6358720 | CSAR_peak_ | 10.94,25.54    | - |
| chr1 | 6358751 | 6358867 | CSAR_peak_ | 13.81,30.25    | - |
| chr1 | 6359159 | 6359278 | CSAR_peak_ | 10.18,19.98    | - |
| chr1 | 6359344 | 6359425 | CSAR_peak_ | 7.27           | - |
| chr1 | 6359429 | 6359443 | CSAR_peak_ | 7.58           | - |
| chr1 | 6359942 | 6359991 | CSAR_peak_ | 10.83          | - |
| chr1 | 6360012 | 6360044 | CSAR_peak_ | 10.83          | - |
| chr1 | 6419805 | 6419859 | CSAR_peak_ | 7.27           | - |
| chr1 | 6457964 | 6458143 | CSAR_peak_ | 17.82,6.95,8.- | - |

|      |         |         |            |                |   |
|------|---------|---------|------------|----------------|---|
| chr1 | 6458145 | 6458210 | CSAR_peak_ | 8.14           | - |
| chr1 | 6458310 | 6458362 | CSAR_peak_ | 21.35,16.33    | - |
| chr1 | 6458437 | 6458536 | CSAR_peak_ | 24.72,16.22,(  | - |
| chr1 | 6458550 | 6458599 | CSAR_peak_ | 7.27           | - |
| chr1 | 6458811 | 6458895 | CSAR_peak_ | 18.65,17.4     | - |
| chr1 | 6459296 | 6459323 | CSAR_peak_ | 7.27           | - |
| chr1 | 6459348 | 6459416 | CSAR_peak_ | 12.13          | - |
| chr1 | 6459606 | 6459664 | CSAR_peak_ | 6.21,13.51     | - |
| chr1 | 6465793 | 6465870 | CSAR_peak_ | 14.42,9.04,7.- | - |
| chr1 | 6465928 | 6466018 | CSAR_peak_ | 41.16,54.26,!- | - |
| chr1 | 6466091 | 6466188 | CSAR_peak_ | 46.1,9.12,51.- | - |
| chr1 | 6466300 | 6466373 | CSAR_peak_ | 15.68,43.7,1-  | - |
| chr1 | 6523566 | 6523642 | CSAR_peak_ | 9.35,12.17     | - |
| chr1 | 6523759 | 6523876 | CSAR_peak_ | 6.95,8.39,17.- | - |
| chr1 | 6523975 | 6524016 | CSAR_peak_ | 10.83          | - |
| chr1 | 6524082 | 6524119 | CSAR_peak_ | 8.39           | - |
| chr1 | 6524124 | 6524231 | CSAR_peak_ | 7.27,16.33     | - |
| chr1 | 6524675 | 6524723 | CSAR_peak_ | 6.21           | - |
| chr1 | 6524918 | 6524958 | CSAR_peak_ | 9.58           | - |
| chr1 | 6525208 | 6525365 | CSAR_peak_ | 10.94,10.33,;- | - |
| chr1 | 6561556 | 6561678 | CSAR_peak_ | 6.03,8.39      | - |
| chr1 | 6562158 | 6562192 | CSAR_peak_ | 7.06           | - |
| chr1 | 6562384 | 6562403 | CSAR_peak_ | 12.13          | - |
| chr1 | 6562588 | 6562679 | CSAR_peak_ | 14.76          | - |
| chr1 | 6576282 | 6576316 | CSAR_peak_ | 6.21           | - |
| chr1 | 6576376 | 6576575 | CSAR_peak_ | 8.14,31.73,2(- | - |
| chr1 | 6576597 | 6576697 | CSAR_peak_ | 10.83          | - |
| chr1 | 6576715 | 6576753 | CSAR_peak_ | 9.58           | - |
| chr1 | 6577229 | 6577265 | CSAR_peak_ | 6.21           | - |
| chr1 | 6577389 | 6577465 | CSAR_peak_ | 9.58,6.21      | - |
| chr1 | 6577539 | 6577743 | CSAR_peak_ | 38.71,27.64    | - |
| chr1 | 6577935 | 6577989 | CSAR_peak_ | 7.58           | - |
| chr1 | 6578103 | 6578175 | CSAR_peak_ | 17.37          | - |
| chr1 | 6578254 | 6578334 | CSAR_peak_ | 7.73,12.13,1(- | - |
| chr1 | 6578427 | 6578523 | CSAR_peak_ | 9.61,33.03     | - |
| chr1 | 6578724 | 6578808 | CSAR_peak_ | 12.13,7.34,6.- | - |
| chr1 | 6578931 | 6579048 | CSAR_peak_ | 28.21,6.02,1!  | - |
| chr1 | 6579054 | 6579093 | CSAR_peak_ | 10.95          | - |
| chr1 | 6609973 | 6610043 | CSAR_peak_ | 29.4,12.13     | - |
| chr1 | 6610492 | 6610592 | CSAR_peak_ | 8.39,16.33     | - |
| chr1 | 6628663 | 6628706 | CSAR_peak_ | 7.27           | - |
| chr1 | 6628733 | 6628854 | CSAR_peak_ | 17.82,12.17    | - |

|      |         |         |             |                |   |
|------|---------|---------|-------------|----------------|---|
| chr1 | 6628945 | 6629034 | CSAR_peak_1 | 7.27,7.27      | - |
| chr1 | 6630663 | 6630714 | CSAR_peak_1 | 8.39           | - |
| chr1 | 6631603 | 6631681 | CSAR_peak_1 | 7.27           | - |
| chr1 | 6631784 | 6631840 | CSAR_peak_1 | 6.57           | - |
| chr1 | 6681766 | 6681810 | CSAR_peak_1 | 11.63,8.39     | - |
| chr1 | 6683078 | 6683164 | CSAR_peak_1 | 7.68,12.13,6.  | - |
| chr1 | 6693022 | 6693152 | CSAR_peak_1 | 6.21           | - |
| chr1 | 6693743 | 6693846 | CSAR_peak_1 | 19.36,17.82,:  | - |
| chr1 | 6694003 | 6694099 | CSAR_peak_1 | 19.36,8.39     | - |
| chr1 | 6694102 | 6694192 | CSAR_peak_1 | 16.33,13.48    | - |
| chr1 | 6694390 | 6694473 | CSAR_peak_1 | 6.03,7.26      | - |
| chr1 | 6694494 | 6694576 | CSAR_peak_1 | 17.82          | - |
| chr1 | 6712028 | 6712152 | CSAR_peak_1 | 8.65           | - |
| chr1 | 6712260 | 6712279 | CSAR_peak_1 | 7.27           | - |
| chr1 | 6712392 | 6712456 | CSAR_peak_1 | 9.55,10.83,6.  | - |
| chr1 | 6712981 | 6713076 | CSAR_peak_1 | 8.14,6.21,7.9- | - |
| chr1 | 6713111 | 6713357 | CSAR_peak_1 | 6.21,9.79,12.- | - |
| chr1 | 6713375 | 6713493 | CSAR_peak_1 | 7.34,18.65     | - |
| chr1 | 6713511 | 6713586 | CSAR_peak_1 | 7.27,19.36     | - |
| chr1 | 6713638 | 6713760 | CSAR_peak_1 | 9.58,7.27      | - |
| chr1 | 6731843 | 6731899 | CSAR_peak_1 | 16.33,8.39     | - |
| chr1 | 6731981 | 6732030 | CSAR_peak_1 | 7.27,7.92      | - |
| chr1 | 6732137 | 6732186 | CSAR_peak_1 | 10.83,8.39     | - |
| chr1 | 6732294 | 6732353 | CSAR_peak_1 | 9.58,11.66     | - |
| chr1 | 6732447 | 6732510 | CSAR_peak_1 | 7.27,6.85      | - |
| chr1 | 6732511 | 6732636 | CSAR_peak_1 | 14.76,7.58,1!  | - |
| chr1 | 6732720 | 6732831 | CSAR_peak_1 | 8.14,9.77,6.6- | - |
| chr1 | 6732887 | 6732983 | CSAR_peak_1 | 31.2,5.86,6.9- | - |
| chr1 | 6733022 | 6733116 | CSAR_peak_1 | 10.62,20.18,:  | - |
| chr1 | 6733395 | 6733471 | CSAR_peak_1 | 22.56,11.38    | - |
| chr1 | 6733918 | 6733931 | CSAR_peak_1 | 8.65           | - |
| chr1 | 6734040 | 6734115 | CSAR_peak_1 | 6.14,11.34     | - |
| chr1 | 6734251 | 6734314 | CSAR_peak_1 | 9.58,7.27      | - |
| chr1 | 6734436 | 6734497 | CSAR_peak_1 | 9.58,21.56     | - |
| chr1 | 6734521 | 6734539 | CSAR_peak_1 | 8.52           | - |
| chr1 | 6734565 | 6734599 | CSAR_peak_1 | 12.5,6.22      | - |
| chr1 | 6734627 | 6734653 | CSAR_peak_1 | 6.21           | - |
| chr1 | 6773262 | 6773317 | CSAR_peak_1 | 10.83,8.39     | - |
| chr1 | 6773340 | 6773376 | CSAR_peak_1 | 6.21           | - |
| chr1 | 6773450 | 6773535 | CSAR_peak_1 | 9.32,6.85      | - |
| chr1 | 6773637 | 6773911 | CSAR_peak_1 | 13.44,20.94,:  | - |
| chr1 | 6773922 | 6774185 | CSAR_peak_1 | 27.77,16.19,:  | - |

|      |         |         |              |                   |
|------|---------|---------|--------------|-------------------|
| chr1 | 6774220 | 6774309 | CSAR_peak_1  | 10.83,15.21,17.82 |
| chr1 | 6774350 | 6774452 | CSAR_peak_2  | 22.56,39.92       |
| chr1 | 6797443 | 6797505 | CSAR_peak_3  | 17.82             |
| chr1 | 6797703 | 6797710 | CSAR_peak_4  | 6.21              |
| chr1 | 6797824 | 6797896 | CSAR_peak_5  | 10.83,8.39        |
| chr1 | 6798854 | 6798937 | CSAR_peak_6  | 9.58,5.86         |
| chr1 | 6799304 | 6799377 | CSAR_peak_7  | 8.39,6.03         |
| chr1 | 6800091 | 6800140 | CSAR_peak_8  | 9.58              |
| chr1 | 6800358 | 6800419 | CSAR_peak_9  | 7.27              |
| chr1 | 6800552 | 6800616 | CSAR_peak_10 | 11.34             |
| chr1 | 6800880 | 6800923 | CSAR_peak_11 | 6.21              |
| chr1 | 6801202 | 6801267 | CSAR_peak_12 | 11.38,6.32        |
| chr1 | 6801369 | 6801418 | CSAR_peak_13 | 7.27              |
| chr1 | 6801961 | 6802113 | CSAR_peak_14 | 19.36,6.95        |
| chr1 | 6802327 | 6802356 | CSAR_peak_15 | 6.21              |
| chr1 | 6803925 | 6803966 | CSAR_peak_16 | 6.21              |
| chr1 | 6810471 | 6810520 | CSAR_peak_17 | 8.39              |
| chr1 | 6810812 | 6810878 | CSAR_peak_18 | 5.86,9.58         |
| chr1 | 6811119 | 6811169 | CSAR_peak_19 | 7.27              |
| chr1 | 6817101 | 6817146 | CSAR_peak_20 | 8.65              |
| chr1 | 6817161 | 6817214 | CSAR_peak_21 | 6.57              |
| chr1 | 6817418 | 6817491 | CSAR_peak_22 | 12.13,9.58,11.34  |
| chr1 | 6817513 | 6817571 | CSAR_peak_23 | 21.41             |
| chr1 | 6817795 | 6817875 | CSAR_peak_24 | 19.36             |
| chr1 | 6817966 | 6818046 | CSAR_peak_25 | 10.02,20.43       |
| chr1 | 6818053 | 6818186 | CSAR_peak_26 | 24.21,16.33       |
| chr1 | 6818218 | 6818299 | CSAR_peak_27 | 5.86,29.4,20.43   |
| chr1 | 6818300 | 6818362 | CSAR_peak_28 | 7.36,7.27         |
| chr1 | 6818376 | 6818484 | CSAR_peak_29 | 18.85,11.32       |
| chr1 | 6818678 | 6818733 | CSAR_peak_30 | 9.77              |
| chr1 | 6818850 | 6819029 | CSAR_peak_31 | 10.83,9.58        |
| chr1 | 6819110 | 6819165 | CSAR_peak_32 | 11.28,5.62        |
| chr1 | 6819184 | 6819270 | CSAR_peak_33 | 9.58              |
| chr1 | 6819296 | 6819368 | CSAR_peak_34 | 9.58,6.81         |
| chr1 | 6819751 | 6819819 | CSAR_peak_35 | 6.44,14.88        |
| chr1 | 6819898 | 6820028 | CSAR_peak_36 | 21.22,33.03       |
| chr1 | 6820146 | 6820287 | CSAR_peak_37 | 29.2,27.11        |
| chr1 | 6820305 | 6820392 | CSAR_peak_38 | 9.77              |
| chr1 | 6820567 | 6820619 | CSAR_peak_39 | 31.2              |
| chr1 | 6820665 | 6820777 | CSAR_peak_40 | 36.78,29.14       |
| chr1 | 6820790 | 6820923 | CSAR_peak_41 | 48.37,9.61        |
| chr1 | 6820935 | 6820988 | CSAR_peak_42 | 16.33             |

|      |         |         |            |               |   |
|------|---------|---------|------------|---------------|---|
| chr1 | 6821060 | 6821162 | CSAR_peak_ | 24.52,7.27    | - |
| chr1 | 6821169 | 6821436 | CSAR_peak_ | 36.78,39.34,3 | - |
| chr1 | 6821439 | 6821532 | CSAR_peak_ | 10.83,7.27    | - |
| chr1 | 6821555 | 6821904 | CSAR_peak_ | 42.59,6.95,19 | - |
| chr1 | 6821931 | 6822064 | CSAR_peak_ | 8.28,8.14,21  | - |
| chr1 | 6822132 | 6822242 | CSAR_peak_ | 22.58,22.56   | - |
| chr1 | 6823949 | 6824035 | CSAR_peak_ | 9.77          | - |
| chr1 | 6858529 | 6858596 | CSAR_peak_ | 12.13         | - |
| chr1 | 6858704 | 6858840 | CSAR_peak_ | 14.88,7.92    | - |
| chr1 | 6858865 | 6858885 | CSAR_peak_ | 6.21          | - |
| chr1 | 6887937 | 6888008 | CSAR_peak_ | 17.82         | - |
| chr1 | 6892735 | 6892803 | CSAR_peak_ | 6.21,5.86     | - |
| chr1 | 6894354 | 6894422 | CSAR_peak_ | 6.21          | - |
| chr1 | 6895358 | 6895420 | CSAR_peak_ | 11.14         | - |
| chr1 | 6895513 | 6895559 | CSAR_peak_ | 5.86,9.58,25  | - |
| chr1 | 6895713 | 6895761 | CSAR_peak_ | 9.58          | - |
| chr1 | 6896059 | 6896139 | CSAR_peak_ | 10.83,7.27    | - |
| chr1 | 6897583 | 6897695 | CSAR_peak_ | 14.88         | - |
| chr1 | 6897714 | 6897882 | CSAR_peak_ | 13.48,17.82   | - |
| chr1 | 6898124 | 6898174 | CSAR_peak_ | 16.05         | - |
| chr1 | 6898194 | 6898265 | CSAR_peak_ | 7.58          | - |
| chr1 | 6900693 | 6900740 | CSAR_peak_ | 7.58          | - |
| chr1 | 6900945 | 6900998 | CSAR_peak_ | 12.27         | - |
| chr1 | 6901055 | 6901089 | CSAR_peak_ | 25.07,13.48   | - |
| chr1 | 6901209 | 6901279 | CSAR_peak_ | 12.74,24.21   | - |
| chr1 | 6901362 | 6901416 | CSAR_peak_ | 14.88         | - |
| chr1 | 6901587 | 6901619 | CSAR_peak_ | 5.9           | - |
| chr1 | 6901700 | 6901743 | CSAR_peak_ | 10.57         | - |
| chr1 | 6901975 | 6901999 | CSAR_peak_ | 8.2           | - |
| chr1 | 6902080 | 6902104 | CSAR_peak_ | 5.86          | - |
| chr1 | 6902200 | 6902239 | CSAR_peak_ | 12.13,9.58    | - |
| chr1 | 6902892 | 6902929 | CSAR_peak_ | 7.27          | - |
| chr1 | 6903175 | 6903222 | CSAR_peak_ | 12.17         | - |
| chr1 | 6903313 | 6903358 | CSAR_peak_ | 6.21          | - |
| chr1 | 6903364 | 6903381 | CSAR_peak_ | 8.39          | - |
| chr1 | 6903473 | 6903535 | CSAR_peak_ | 10.31,12.13   | - |
| chr1 | 6903623 | 6903671 | CSAR_peak_ | 12.5          | - |
| chr1 | 6903680 | 6903758 | CSAR_peak_ | 8.39          | - |
| chr1 | 6938110 | 6938155 | CSAR_peak_ | 8.39,6.21     | - |
| chr1 | 6938187 | 6938219 | CSAR_peak_ | 10.83         | - |
| chr1 | 6939025 | 6939079 | CSAR_peak_ | 7.27          | - |
| chr1 | 6969611 | 6969817 | CSAR_peak_ | 11.14,20.54,3 | - |

|      |         |         |            |               |   |
|------|---------|---------|------------|---------------|---|
| chr1 | 6969862 | 6970100 | CSAR_peak_ | 31.2,42.64    | - |
| chr1 | 6970152 | 6970208 | CSAR_peak_ | 20.94,7.58    | - |
| chr1 | 6970346 | 6970411 | CSAR_peak_ | 6.21,8.39     | - |
| chr1 | 6970438 | 6970500 | CSAR_peak_ | 14.88,8.39    | - |
| chr1 | 6999006 | 6999069 | CSAR_peak_ | 13.48         | - |
| chr1 | 6999358 | 6999408 | CSAR_peak_ | 8.39,9.58     | - |
| chr1 | 6999420 | 6999506 | CSAR_peak_ | 11.63,11.63,  | - |
| chr1 | 6999581 | 6999612 | CSAR_peak_ | 9.58          | - |
| chr1 | 7004118 | 7004176 | CSAR_peak_ | 8.65          | - |
| chr1 | 7005805 | 7005836 | CSAR_peak_ | 5.86          | - |
| chr1 | 7006517 | 7006561 | CSAR_peak_ | 6.21          | - |
| chr1 | 7021622 | 7021676 | CSAR_peak_ | 7.27          | - |
| chr1 | 7038936 | 7038988 | CSAR_peak_ | 8.65,7.58     | - |
| chr1 | 7039026 | 7039109 | CSAR_peak_ | 7.27          | - |
| chr1 | 7039124 | 7039204 | CSAR_peak_ | 12.13         | - |
| chr1 | 7039239 | 7039396 | CSAR_peak_ | 10.76,7.58    | - |
| chr1 | 7039568 | 7039612 | CSAR_peak_ | 7.27          | - |
| chr1 | 7039645 | 7039725 | CSAR_peak_ | 6.21          | - |
| chr1 | 7039837 | 7039876 | CSAR_peak_ | 9.58          | - |
| chr1 | 7042671 | 7042696 | CSAR_peak_ | 6.21          | - |
| chr1 | 7042814 | 7043012 | CSAR_peak_ | 38.29,17.37,  | - |
| chr1 | 7043061 | 7043171 | CSAR_peak_ | 7.58,12.17    | - |
| chr1 | 7078246 | 7078294 | CSAR_peak_ | 7.27          | - |
| chr1 | 7079064 | 7079087 | CSAR_peak_ | 7.26          | - |
| chr1 | 7079239 | 7079295 | CSAR_peak_ | 7.27,9.58     | - |
| chr1 | 7079880 | 7079979 | CSAR_peak_ | 7,16.78,11.2, | - |
| chr1 | 7080055 | 7080109 | CSAR_peak_ | 6.21,14.88    | - |
| chr1 | 7080128 | 7080197 | CSAR_peak_ | 16.05         | - |
| chr1 | 7080319 | 7080376 | CSAR_peak_ | 6.81          | - |
| chr1 | 7080415 | 7080480 | CSAR_peak_ | 5.86,9.77     | - |
| chr1 | 7080852 | 7080946 | CSAR_peak_ | 8.14,19.98,1, | - |
| chr1 | 7081378 | 7081482 | CSAR_peak_ | 15.21,14.88,  | - |
| chr1 | 7081690 | 7081799 | CSAR_peak_ | 14.88,14.88   | - |
| chr1 | 7081868 | 7081940 | CSAR_peak_ | 14.88,8.14,1, | - |
| chr1 | 7081961 | 7082033 | CSAR_peak_ | 6.03,8.53     | - |
| chr1 | 7082957 | 7083042 | CSAR_peak_ | 7.27          | - |
| chr1 | 7083045 | 7083139 | CSAR_peak_ | 12.13,8.39    | - |
| chr1 | 7083268 | 7083372 | CSAR_peak_ | 9.61,14.88    | - |
| chr1 | 7083560 | 7083646 | CSAR_peak_ | 7.27          | - |
| chr1 | 7083715 | 7083768 | CSAR_peak_ | 7.27          | - |
| chr1 | 7083787 | 7083844 | CSAR_peak_ | 14.88,19.36   | - |
| chr1 | 7083943 | 7084020 | CSAR_peak_ | 10.83,8.39    | - |

|      |         |         |            |                 |   |
|------|---------|---------|------------|-----------------|---|
| chr1 | 7084188 | 7084251 | CSAR_peak_ | 26.8,22.74      | - |
| chr1 | 7084347 | 7084447 | CSAR_peak_ | 47.23,5.79      | - |
| chr1 | 7084551 | 7085702 | CSAR_peak_ | 31.48,25.76,,-  |   |
| chr1 | 7087429 | 7087490 | CSAR_peak_ | 10.95,9.77      | - |
| chr1 | 7087857 | 7087922 | CSAR_peak_ | 33.03,19.36     | - |
| chr1 | 7088100 | 7088150 | CSAR_peak_ | 8.52            | - |
| chr1 | 7088154 | 7088431 | CSAR_peak_ | 46.46,22.11,,-  |   |
| chr1 | 7088462 | 7088921 | CSAR_peak_ | 30.49,39.74,,-  |   |
| chr1 | 7088958 | 7089192 | CSAR_peak_ | 14.79,51.8,7!,- |   |
| chr1 | 7103556 | 7103590 | CSAR_peak_ | 6.03            | - |
| chr1 | 7103671 | 7103722 | CSAR_peak_ | 9.58            | - |
| chr1 | 7103746 | 7103900 | CSAR_peak_ | 29.4,8.14,26.-  |   |
| chr1 | 7103936 | 7104068 | CSAR_peak_ | 7.27,8.14       | - |
| chr1 | 7104105 | 7104173 | CSAR_peak_ | 6.12            | - |
| chr1 | 7104212 | 7104253 | CSAR_peak_ | 7.27            | - |
| chr1 | 7104254 | 7104343 | CSAR_peak_ | 14.88,7.27      | - |
| chr1 | 7104368 | 7104565 | CSAR_peak_ | 8.39,31.2,5.8-  |   |
| chr1 | 7104653 | 7104662 | CSAR_peak_ | 6.03            | - |
| chr1 | 7104722 | 7104772 | CSAR_peak_ | 9.95            | - |
| chr1 | 7104780 | 7104920 | CSAR_peak_ | 12.54,16.11,,-  |   |
| chr1 | 7104935 | 7104979 | CSAR_peak_ | 6.03            | - |
| chr1 | 7105236 | 7105269 | CSAR_peak_ | 6.21            | - |
| chr1 | 7105297 | 7105343 | CSAR_peak_ | 13.48           | - |
| chr1 | 7105797 | 7105850 | CSAR_peak_ | 9.58            | - |
| chr1 | 7165805 | 7165885 | CSAR_peak_ | 9.58,10.83      | - |
| chr1 | 7165964 | 7166018 | CSAR_peak_ | 6.21            | - |
| chr1 | 7176119 | 7176201 | CSAR_peak_ | 13.85,35.56,,-  |   |
| chr1 | 7245641 | 7245702 | CSAR_peak_ | 16.33,19.36     | - |
| chr1 | 7245923 | 7245998 | CSAR_peak_ | 17.82,6.21      | - |
| chr1 | 7246168 | 7246211 | CSAR_peak_ | 13.51,7.27      | - |
| chr1 | 7246249 | 7246291 | CSAR_peak_ | 7.27            | - |
| chr1 | 7246361 | 7246463 | CSAR_peak_ | 13.48,6.21      | - |
| chr1 | 7246654 | 7246849 | CSAR_peak_ | 13.66,14.93     | - |
| chr1 | 7246927 | 7246983 | CSAR_peak_ | 17.37,9.27      | - |
| chr1 | 7247117 | 7247161 | CSAR_peak_ | 6.21            | - |
| chr1 | 7280348 | 7280393 | CSAR_peak_ | 7.27            | - |
| chr1 | 7298575 | 7298627 | CSAR_peak_ | 6.21            | - |
| chr1 | 7302579 | 7302628 | CSAR_peak_ | 7.27            | - |
| chr1 | 7302926 | 7302961 | CSAR_peak_ | 7.27            | - |
| chr1 | 7305649 | 7305734 | CSAR_peak_ | 9.58            | - |
| chr1 | 7306018 | 7306079 | CSAR_peak_ | 12.17           | - |
| chr1 | 7306975 | 7307050 | CSAR_peak_ | 6.21,9.58       | - |



|      |         |         |            |               |   |
|------|---------|---------|------------|---------------|---|
| chr1 | 7308071 | 7308168 | CSAR_peak_ | 8.39,9.58     | - |
| chr1 | 7308426 | 7308489 | CSAR_peak_ | 10.02         | - |
| chr1 | 7308657 | 7308771 | CSAR_peak_ | 9.48,8.14,13. | - |
| chr1 | 7308809 | 7308859 | CSAR_peak_ | 6.57          | - |
| chr1 | 7309127 | 7309356 | CSAR_peak_ | 12.59,17.4,1. | - |
| chr1 | 7309382 | 7309485 | CSAR_peak_ | 28.34,7.92    | - |
| chr1 | 7309593 | 7309630 | CSAR_peak_ | 5.86          | - |
| chr1 | 7309659 | 7309754 | CSAR_peak_ | 12.13,12.13   | - |
| chr1 | 7309894 | 7309931 | CSAR_peak_ | 6.95          | - |
| chr1 | 7310086 | 7310141 | CSAR_peak_ | 7.27          | - |
| chr1 | 7376236 | 7376289 | CSAR_peak_ | 6.1,6.02      | - |
| chr1 | 7376318 | 7376357 | CSAR_peak_ | 7.27          | - |
| chr1 | 7377150 | 7377267 | CSAR_peak_ | 8.39,6.21     | - |
| chr1 | 7377710 | 7377814 | CSAR_peak_ | 10.83,10.31   | - |
| chr1 | 7378778 | 7379005 | CSAR_peak_ | 37.55,45.14,  | - |
| chr1 | 7379020 | 7379151 | CSAR_peak_ | 24.21,20.43,  | - |
| chr1 | 7379318 | 7379379 | CSAR_peak_ | 12.5,12.54,1. | - |
| chr1 | 7379419 | 7379470 | CSAR_peak_ | 7.26,9.48,13. | - |
| chr1 | 7379582 | 7379947 | CSAR_peak_ | 14.76,8.95,7. | - |
| chr1 | 7380145 | 7380292 | CSAR_peak_ | 12.13,14.25   | - |
| chr1 | 7380410 | 7380545 | CSAR_peak_ | 22.58,26.55,  | - |
| chr1 | 7380802 | 7380908 | CSAR_peak_ | 17.82,12.13   | - |
| chr1 | 7381099 | 7381182 | CSAR_peak_ | 17.82,14.08   | - |
| chr1 | 7381633 | 7381722 | CSAR_peak_ | 17.82,7.27    | - |
| chr1 | 7381778 | 7381857 | CSAR_peak_ | 6.81,16.33,6. | - |
| chr1 | 7382189 | 7382340 | CSAR_peak_ | 17.82,14.08   | - |
| chr1 | 7387233 | 7387288 | CSAR_peak_ | 6.21          | - |
| chr1 | 7387409 | 7387466 | CSAR_peak_ | 7.27          | - |
| chr1 | 7387769 | 7387803 | CSAR_peak_ | 9.58          | - |
| chr1 | 7390186 | 7390247 | CSAR_peak_ | 7.26,6.21     | - |
| chr1 | 7399139 | 7399310 | CSAR_peak_ | 9.58,6.57,7.9 | - |
| chr1 | 7399311 | 7399642 | CSAR_peak_ | 28.21,15.9,3. | - |
| chr1 | 7399898 | 7399941 | CSAR_peak_ | 6.64          | - |
| chr1 | 7400184 | 7400235 | CSAR_peak_ | 6.21          | - |
| chr1 | 7400468 | 7400527 | CSAR_peak_ | 9.58          | - |
| chr1 | 7408292 | 7408336 | CSAR_peak_ | 7.27,12.13    | - |
| chr1 | 7409186 | 7409255 | CSAR_peak_ | 6.85,8.65     | - |
| chr1 | 7409738 | 7409792 | CSAR_peak_ | 6.21          | - |
| chr1 | 7409953 | 7410006 | CSAR_peak_ | 12.13         | - |
| chr1 | 7410311 | 7410388 | CSAR_peak_ | 7.58,8.39     | - |
| chr1 | 7453497 | 7453574 | CSAR_peak_ | 10.31,17.82   | - |
| chr1 | 7486382 | 7486416 | CSAR_peak_ | 6.21          | - |

|      |         |         |              |                   |   |
|------|---------|---------|--------------|-------------------|---|
| chr1 | 7486665 | 7486685 | CSAR_peak_1  | 6.21              | - |
| chr1 | 7486783 | 7486877 | CSAR_peak_2  | 14.88             | - |
| chr1 | 7486931 | 7487031 | CSAR_peak_3  | 24.21             | - |
| chr1 | 7487565 | 7487662 | CSAR_peak_4  | 7.27,12.5         | - |
| chr1 | 7487757 | 7487823 | CSAR_peak_5  | 6.44              | - |
| chr1 | 7487984 | 7488085 | CSAR_peak_6  | 21.94,14.08       | - |
| chr1 | 7488492 | 7488496 | CSAR_peak_7  | 7.27              | - |
| chr1 | 7502624 | 7502673 | CSAR_peak_8  | 7.27              | - |
| chr1 | 7503045 | 7503074 | CSAR_peak_9  | 10.83             | - |
| chr1 | 7511855 | 7511982 | CSAR_peak_10 | 9.58,10.83        | - |
| chr1 | 7511985 | 7512038 | CSAR_peak_11 | 17.82             | - |
| chr1 | 7512109 | 7512154 | CSAR_peak_12 | 9.77              | - |
| chr1 | 7512294 | 7512355 | CSAR_peak_13 | 12.31,25.91       | - |
| chr1 | 7512702 | 7512796 | CSAR_peak_14 | 12.13,6.57        | - |
| chr1 | 7512926 | 7512986 | CSAR_peak_15 | 9.58,9.58         | - |
| chr1 | 7513109 | 7513131 | CSAR_peak_16 | 6.21              | - |
| chr1 | 7513248 | 7513337 | CSAR_peak_17 | 7,31.2,25.62      | - |
| chr1 | 7530273 | 7530351 | CSAR_peak_18 | 6.81              | - |
| chr1 | 7556953 | 7556997 | CSAR_peak_19 | 7.27              | - |
| chr1 | 7557429 | 7557668 | CSAR_peak_20 | 15.21,16.11,16.11 | - |
| chr1 | 7558054 | 7558247 | CSAR_peak_21 | 6.02,12.17        | - |
| chr1 | 7558465 | 7558502 | CSAR_peak_22 | 7.27              | - |
| chr1 | 7558542 | 7558635 | CSAR_peak_23 | 8.14              | - |
| chr1 | 7558856 | 7558958 | CSAR_peak_24 | 19.36,10.83       | - |
| chr1 | 7558963 | 7559032 | CSAR_peak_25 | 7.89              | - |
| chr1 | 7559128 | 7559197 | CSAR_peak_26 | 20.13             | - |
| chr1 | 7559453 | 7559514 | CSAR_peak_27 | 7.27,16.11        | - |
| chr1 | 7559649 | 7559726 | CSAR_peak_28 | 19.18,26.69,16.11 | - |
| chr1 | 7559850 | 7559924 | CSAR_peak_29 | 14.88,19.36       | - |
| chr1 | 7560129 | 7560212 | CSAR_peak_30 | 8.39              | - |
| chr1 | 7561785 | 7561836 | CSAR_peak_31 | 7.27              | - |
| chr1 | 7561921 | 7561976 | CSAR_peak_32 | 8.39              | - |
| chr1 | 7562238 | 7562308 | CSAR_peak_33 | 16.33,16.08       | - |
| chr1 | 7562390 | 7562478 | CSAR_peak_34 | 59.38             | - |
| chr1 | 7562995 | 7563141 | CSAR_peak_35 | 16.33,12.5        | - |
| chr1 | 7563175 | 7563307 | CSAR_peak_36 | 27.64,12.13       | - |
| chr1 | 7563538 | 7563631 | CSAR_peak_37 | 14.88,42.87       | - |
| chr1 | 7563765 | 7563855 | CSAR_peak_38 | 12.72,12.31       | - |
| chr1 | 7563895 | 7564031 | CSAR_peak_39 | 17.82,27.64       | - |
| chr1 | 7564242 | 7564326 | CSAR_peak_40 | 7.27              | - |
| chr1 | 7564519 | 7564670 | CSAR_peak_41 | 9.58,19.36        | - |
| chr1 | 7564677 | 7564792 | CSAR_peak_42 | 24.21,7.27        | - |

|      |         |         |            |               |   |
|------|---------|---------|------------|---------------|---|
| chr1 | 7564808 | 7564930 | CSAR_peak_ | 48.37,44.49   | - |
| chr1 | 7564945 | 7565060 | CSAR_peak_ | 7.27,24.21    | - |
| chr1 | 7565065 | 7565131 | CSAR_peak_ | 9.58          | - |
| chr1 | 7565138 | 7565255 | CSAR_peak_ | 13.48,8.28    | - |
| chr1 | 7565461 | 7565509 | CSAR_peak_ | 7.27          | - |
| chr1 | 7567450 | 7567519 | CSAR_peak_ | 8.39,7.27     | - |
| chr1 | 7567731 | 7567787 | CSAR_peak_ | 13.48,10.83   | - |
| chr1 | 7569552 | 7569682 | CSAR_peak_ | 9.58          | - |
| chr1 | 7571341 | 7571395 | CSAR_peak_ | 14.88         | - |
| chr1 | 7571552 | 7571637 | CSAR_peak_ | 12.5,6.81,11. | - |
| chr1 | 7571742 | 7571763 | CSAR_peak_ | 9.58          | - |
| chr1 | 7572177 | 7572242 | CSAR_peak_ | 7.58,6.44     | - |
| chr1 | 7572476 | 7572557 | CSAR_peak_ | 8.39,10.83    | - |
| chr1 | 7573151 | 7573217 | CSAR_peak_ | 9.58,6.21     | - |
| chr1 | 7573501 | 7573552 | CSAR_peak_ | 10.83,12.17   | - |
| chr1 | 7621139 | 7621173 | CSAR_peak_ | 7.27          | - |
| chr1 | 7652125 | 7652270 | CSAR_peak_ | 6.21,12.5     | - |
| chr1 | 7661253 | 7661297 | CSAR_peak_ | 16.33         | - |
| chr1 | 7661458 | 7661561 | CSAR_peak_ | 31.73         | - |
| chr1 | 7661661 | 7661762 | CSAR_peak_ | 8.39,13.51    | - |
| chr1 | 7704543 | 7704688 | CSAR_peak_ | 12.13,9.58,9. | - |
| chr1 | 7704690 | 7704697 | CSAR_peak_ | 6.21          | - |
| chr1 | 7704757 | 7704812 | CSAR_peak_ | 8.28          | - |
| chr1 | 7704839 | 7704919 | CSAR_peak_ | 5.95,7.61     | - |
| chr1 | 7705001 | 7705057 | CSAR_peak_ | 8.39          | - |
| chr1 | 7705171 | 7705203 | CSAR_peak_ | 10.18         | - |
| chr1 | 7705373 | 7705456 | CSAR_peak_ | 7.27          | - |
| chr1 | 7705953 | 7706000 | CSAR_peak_ | 6.44          | - |
| chr1 | 7780519 | 7780588 | CSAR_peak_ | 14.88         | - |
| chr1 | 7828892 | 7828946 | CSAR_peak_ | 7.58          | - |
| chr1 | 7829386 | 7829470 | CSAR_peak_ | 9.61          | - |
| chr1 | 7829667 | 7829727 | CSAR_peak_ | 25.91,13.44   | - |
| chr1 | 7838451 | 7838500 | CSAR_peak_ | 9.58          | - |
| chr1 | 7838718 | 7838744 | CSAR_peak_ | 6.57          | - |
| chr1 | 7838833 | 7838884 | CSAR_peak_ | 7.27          | - |
| chr1 | 7839357 | 7839442 | CSAR_peak_ | 10.31         | - |
| chr1 | 7879147 | 7879192 | CSAR_peak_ | 6.21          | - |
| chr1 | 7879248 | 7879264 | CSAR_peak_ | 6.21          | - |
| chr1 | 7879636 | 7879699 | CSAR_peak_ | 9.58,10.83    | - |
| chr1 | 7879728 | 7879785 | CSAR_peak_ | 7.27          | - |
| chr1 | 7879866 | 7880006 | CSAR_peak_ | 16.87,10.31   | - |
| chr1 | 7880083 | 7880096 | CSAR_peak_ | 10.83         | - |

|      |         |         |            |                  |   |
|------|---------|---------|------------|------------------|---|
| chr1 | 7880382 | 7880431 | CSAR_peak_ | 6.81,6.21        | - |
| chr1 | 7880470 | 7880557 | CSAR_peak_ | 19.98,13.29      | - |
| chr1 | 7881043 | 7881086 | CSAR_peak_ | 7.27             | - |
| chr1 | 7882839 | 7882906 | CSAR_peak_ | 9.58             | - |
| chr1 | 7892850 | 7893077 | CSAR_peak_ | 14.88,8.14,10.14 | - |
| chr1 | 7893477 | 7893512 | CSAR_peak_ | 7.27             | - |
| chr1 | 7894636 | 7894692 | CSAR_peak_ | 13.48,6.03       | - |
| chr1 | 7894996 | 7895105 | CSAR_peak_ | 34.89,16.33      | - |
| chr1 | 7895125 | 7895340 | CSAR_peak_ | 7.27,6.57,8.57   | - |
| chr1 | 7895370 | 7895407 | CSAR_peak_ | 7.27             | - |
| chr1 | 7895421 | 7895760 | CSAR_peak_ | 20.94,6.44,20.94 | - |
| chr1 | 7895836 | 7895917 | CSAR_peak_ | 12.13            | - |
| chr1 | 7895921 | 7896084 | CSAR_peak_ | 9.97,5.62,33.0   | - |
| chr1 | 7896273 | 7896324 | CSAR_peak_ | 7.27             | - |
| chr1 | 7896579 | 7896641 | CSAR_peak_ | 10.83            | - |
| chr1 | 7896839 | 7896877 | CSAR_peak_ | 7.27             | - |
| chr1 | 7896897 | 7896964 | CSAR_peak_ | 16.11,25.1       | - |
| chr1 | 7897132 | 7897185 | CSAR_peak_ | 11.96            | - |
| chr1 | 7897268 | 7897319 | CSAR_peak_ | 12.17            | - |
| chr1 | 7897483 | 7897542 | CSAR_peak_ | 16.33,9.58       | - |
| chr1 | 7898208 | 7898256 | CSAR_peak_ | 8.39             | - |
| chr1 | 7904778 | 7904825 | CSAR_peak_ | 7.27             | - |
| chr1 | 7906608 | 7906652 | CSAR_peak_ | 7.27             | - |
| chr1 | 7938486 | 7938534 | CSAR_peak_ | 7.27             | - |
| chr1 | 7940330 | 7940385 | CSAR_peak_ | 9.58             | - |
| chr1 | 7949979 | 7950078 | CSAR_peak_ | 12.13            | - |
| chr1 | 7950227 | 7950268 | CSAR_peak_ | 10.83            | - |
| chr1 | 7950684 | 7950749 | CSAR_peak_ | 6.21,8.39        | - |
| chr1 | 7951413 | 7951492 | CSAR_peak_ | 25.91,9.58       | - |
| chr1 | 7951968 | 7952040 | CSAR_peak_ | 12.13            | - |
| chr1 | 7952139 | 7952176 | CSAR_peak_ | 7.27             | - |
| chr1 | 7952598 | 7952628 | CSAR_peak_ | 9.48             | - |
| chr1 | 7952644 | 7952678 | CSAR_peak_ | 13.51            | - |
| chr1 | 7953908 | 7953991 | CSAR_peak_ | 8.39             | - |
| chr1 | 7954296 | 7954351 | CSAR_peak_ | 7.27,9.58        | - |
| chr1 | 7955668 | 7955848 | CSAR_peak_ | 6.21,24.21,10.14 | - |
| chr1 | 7955999 | 7956019 | CSAR_peak_ | 6.57             | - |
| chr1 | 7956030 | 7956147 | CSAR_peak_ | 6.81,10.83,20.94 | - |
| chr1 | 7956355 | 7956542 | CSAR_peak_ | 27.11,9.55,33.0  | - |
| chr1 | 7956581 | 7956601 | CSAR_peak_ | 7.27             | - |
| chr1 | 7956617 | 7956709 | CSAR_peak_ | 17.82,9.77       | - |
| chr1 | 7956781 | 7956910 | CSAR_peak_ | 10.62,17.82      | - |

|      |         |         |            |                |
|------|---------|---------|------------|----------------|
| chr1 | 7957002 | 7957171 | CSAR_peak_ | 12.13,10.02,-  |
| chr1 | 7957320 | 7957449 | CSAR_peak_ | 7.27,9.77 -    |
| chr1 | 7957490 | 7957803 | CSAR_peak_ | 11.28,29.69,-  |
| chr1 | 7957829 | 7957889 | CSAR_peak_ | 10.02,9.77 -   |
| chr1 | 7957895 | 7958103 | CSAR_peak_ | 12.23,9.58,2(- |
| chr1 | 7958157 | 7958255 | CSAR_peak_ | 32.46,37.55 -  |
| chr1 | 7958301 | 7958339 | CSAR_peak_ | 6.21,9.58 -    |
| chr1 | 7966993 | 7967040 | CSAR_peak_ | 6.21 -         |
| chr1 | 7968227 | 7968279 | CSAR_peak_ | 9.58 -         |
| chr1 | 7976240 | 7976319 | CSAR_peak_ | 9.58,14.88 -   |
| chr1 | 7976541 | 7976597 | CSAR_peak_ | 12.27,10.95 -  |
| chr1 | 7976606 | 7976936 | CSAR_peak_ | 34.04,27.61,-  |
| chr1 | 7976959 | 7977114 | CSAR_peak_ | 60.85,62.11 -  |
| chr1 | 7977205 | 7978121 | CSAR_peak_ | 17.28,19.98,-  |
| chr1 | 7978151 | 7978591 | CSAR_peak_ | 44.63,19.98,-  |
| chr1 | 7978652 | 7978698 | CSAR_peak_ | 7.92,19.36 -   |
| chr1 | 8000887 | 8000931 | CSAR_peak_ | 6.21 -         |
| chr1 | 8001661 | 8001701 | CSAR_peak_ | 7.58 -         |
| chr1 | 8028338 | 8028413 | CSAR_peak_ | 12.17 -        |
| chr1 | 8028466 | 8028608 | CSAR_peak_ | 16.11,14.88 -  |
| chr1 | 8028687 | 8028731 | CSAR_peak_ | 9.58 -         |
| chr1 | 8029199 | 8029247 | CSAR_peak_ | 7.27 -         |
| chr1 | 8151189 | 8151224 | CSAR_peak_ | 7.27 -         |
| chr1 | 8152034 | 8152077 | CSAR_peak_ | 7.27 -         |
| chr1 | 8152210 | 8152269 | CSAR_peak_ | 17.82 -        |
| chr1 | 8153250 | 8153365 | CSAR_peak_ | 20.13,13.92 -  |
| chr1 | 8153480 | 8153557 | CSAR_peak_ | 14,12.17 -     |
| chr1 | 8180695 | 8180765 | CSAR_peak_ | 9.58,7.92 -    |
| chr1 | 8181169 | 8181241 | CSAR_peak_ | 9.77,12.13 -   |
| chr1 | 8182025 | 8182067 | CSAR_peak_ | 8.39 -         |
| chr1 | 8182110 | 8182129 | CSAR_peak_ | 6.57 -         |
| chr1 | 8182218 | 8182312 | CSAR_peak_ | 7.27,9.58 -    |
| chr1 | 8186821 | 8186863 | CSAR_peak_ | 5.86 -         |
| chr1 | 8202778 | 8202835 | CSAR_peak_ | 7.92 -         |
| chr1 | 8257463 | 8257560 | CSAR_peak_ | 12.31 -        |
| chr1 | 8257670 | 8257751 | CSAR_peak_ | 6.21,8.39 -    |
| chr1 | 8258201 | 8258237 | CSAR_peak_ | 9.77 -         |
| chr1 | 8258303 | 8258325 | CSAR_peak_ | 12.13 -        |
| chr1 | 8258546 | 8258589 | CSAR_peak_ | 12.13 -        |
| chr1 | 8268761 | 8268850 | CSAR_peak_ | 6.03,8.12 -    |
| chr1 | 8268935 | 8269088 | CSAR_peak_ | 13.92,17.28,-  |
| chr1 | 8269186 | 8269241 | CSAR_peak_ | 10.12,9.35,1-  |

|      |         |         |            |                 |   |
|------|---------|---------|------------|-----------------|---|
| chr1 | 8269356 | 8269469 | CSAR_peak_ | 21.94,12.59     | - |
| chr1 | 8269474 | 8269581 | CSAR_peak_ | 22.56,7.92      | - |
| chr1 | 8269649 | 8269664 | CSAR_peak_ | 6.1,6.95        | - |
| chr1 | 8269717 | 8269763 | CSAR_peak_ | 24.21,9.58      | - |
| chr1 | 8269886 | 8270022 | CSAR_peak_ | 5.79,14.92,1.1  | - |
| chr1 | 8270129 | 8270217 | CSAR_peak_ | 14.88,12.74     | - |
| chr1 | 8270270 | 8270288 | CSAR_peak_ | 6.21            | - |
| chr1 | 8270371 | 8270459 | CSAR_peak_ | 25.02,11.63,1.1 | - |
| chr1 | 8270542 | 8270600 | CSAR_peak_ | 17.4,7.26,12.1  | - |
| chr1 | 8270711 | 8270757 | CSAR_peak_ | 12.13           | - |
| chr1 | 8270810 | 8270829 | CSAR_peak_ | 6.45            | - |
| chr1 | 8270912 | 8270978 | CSAR_peak_ | 20.04,8.34      | - |
| chr1 | 8271209 | 8271340 | CSAR_peak_ | 21.35,8.3       | - |
| chr1 | 8271658 | 8271711 | CSAR_peak_ | 8.09            | - |
| chr1 | 8279948 | 8280021 | CSAR_peak_ | 16.33,7.27      | - |
| chr1 | 8280243 | 8280313 | CSAR_peak_ | 11.66           | - |
| chr1 | 8280376 | 8280409 | CSAR_peak_ | 7.27            | - |
| chr1 | 8281469 | 8281502 | CSAR_peak_ | 9.77            | - |
| chr1 | 8296027 | 8296081 | CSAR_peak_ | 8.65            | - |
| chr1 | 8296254 | 8296450 | CSAR_peak_ | 17.82,11.03,1.1 | - |
| chr1 | 8296594 | 8296646 | CSAR_peak_ | 9.58            | - |
| chr1 | 8301681 | 8301788 | CSAR_peak_ | 7.58,9.77       | - |
| chr1 | 8309262 | 8309375 | CSAR_peak_ | 7.27,7.27       | - |
| chr1 | 8309604 | 8309753 | CSAR_peak_ | 6.02,9.77       | - |
| chr1 | 8309959 | 8309986 | CSAR_peak_ | 6.21            | - |
| chr1 | 8310578 | 8310638 | CSAR_peak_ | 12.17           | - |
| chr1 | 8312206 | 8312315 | CSAR_peak_ | 6.21            | - |
| chr1 | 8312365 | 8312490 | CSAR_peak_ | 12.13,6.21      | - |
| chr1 | 8313868 | 8313923 | CSAR_peak_ | 7.27            | - |
| chr1 | 8314183 | 8314239 | CSAR_peak_ | 9.77            | - |
| chr1 | 8428076 | 8428098 | CSAR_peak_ | 17.82           | - |
| chr1 | 8428235 | 8428265 | CSAR_peak_ | 10.95           | - |
| chr1 | 8505664 | 8505699 | CSAR_peak_ | 6.21            | - |
| chr1 | 8505929 | 8505969 | CSAR_peak_ | 7.27,6.21       | - |
| chr1 | 8525089 | 8525216 | CSAR_peak_ | 85.54,36.59,1.1 | - |
| chr1 | 8525592 | 8525690 | CSAR_peak_ | 5.86            | - |
| chr1 | 8525941 | 8525988 | CSAR_peak_ | 7.27            | - |
| chr1 | 8526052 | 8526207 | CSAR_peak_ | 10.83,12.13     | - |
| chr1 | 8526215 | 8526303 | CSAR_peak_ | 10.83           | - |
| chr1 | 8553152 | 8553218 | CSAR_peak_ | 10.83,7.27      | - |
| chr1 | 8553858 | 8553915 | CSAR_peak_ | 13.48,9.58      | - |
| chr1 | 8554001 | 8554052 | CSAR_peak_ | 10.83,17.35     | - |

|      |         |         |            |                   |   |
|------|---------|---------|------------|-------------------|---|
| chr1 | 8554074 | 8554107 | CSAR_peak_ | 9.58              | - |
| chr1 | 8554208 | 8554267 | CSAR_peak_ | 16.33,20.94       | - |
| chr1 | 8554344 | 8554399 | CSAR_peak_ | 20.94             | - |
| chr1 | 8554671 | 8554785 | CSAR_peak_ | 13.44,8.14,17.82  | - |
| chr1 | 8554889 | 8554973 | CSAR_peak_ | 17.51,5.86,9.58   | - |
| chr1 | 8554987 | 8555065 | CSAR_peak_ | 13.48,8.14        | - |
| chr1 | 8555086 | 8555272 | CSAR_peak_ | 17.82,17.37       | - |
| chr1 | 8555367 | 8555394 | CSAR_peak_ | 6.03              | - |
| chr1 | 8555406 | 8555475 | CSAR_peak_ | 19.93,10.31       | - |
| chr1 | 8555804 | 8555850 | CSAR_peak_ | 6.21              | - |
| chr1 | 8558547 | 8558584 | CSAR_peak_ | 7.27              | - |
| chr1 | 8560951 | 8561005 | CSAR_peak_ | 7.27              | - |
| chr1 | 8561087 | 8561128 | CSAR_peak_ | 9.58              | - |
| chr1 | 8561294 | 8561320 | CSAR_peak_ | 8.39              | - |
| chr1 | 8561413 | 8561506 | CSAR_peak_ | 14.88,27.64       | - |
| chr1 | 8562379 | 8562397 | CSAR_peak_ | 6.21              | - |
| chr1 | 8562509 | 8562558 | CSAR_peak_ | 8.65              | - |
| chr1 | 8562692 | 8562836 | CSAR_peak_ | 8.39,9.58,6.4     | - |
| chr1 | 8565105 | 8565114 | CSAR_peak_ | 6.21              | - |
| chr1 | 8565216 | 8565261 | CSAR_peak_ | 12.13             | - |
| chr1 | 8565416 | 8565525 | CSAR_peak_ | 7.27,8.39         | - |
| chr1 | 8565528 | 8565657 | CSAR_peak_ | 24.21,13.44,17.82 | - |
| chr1 | 8565745 | 8565821 | CSAR_peak_ | 12.17,27.64       | - |
| chr1 | 8566100 | 8566155 | CSAR_peak_ | 7.92,9.77         | - |
| chr1 | 8566249 | 8566296 | CSAR_peak_ | 12.31             | - |
| chr1 | 8566434 | 8566501 | CSAR_peak_ | 7.27              | - |
| chr1 | 8566855 | 8566894 | CSAR_peak_ | 14.88,14.76       | - |
| chr1 | 8566970 | 8567006 | CSAR_peak_ | 13.44,9.77        | - |
| chr1 | 8567144 | 8567223 | CSAR_peak_ | 6.1,7.27          | - |
| chr1 | 8567447 | 8567465 | CSAR_peak_ | 7.27              | - |
| chr1 | 8567606 | 8567623 | CSAR_peak_ | 6.21              | - |
| chr1 | 8567944 | 8568036 | CSAR_peak_ | 9.77,14.88        | - |
| chr1 | 8568585 | 8568635 | CSAR_peak_ | 7.27              | - |
| chr1 | 8568862 | 8568909 | CSAR_peak_ | 8.39              | - |
| chr1 | 8569010 | 8569038 | CSAR_peak_ | 7.27              | - |
| chr1 | 8569802 | 8569873 | CSAR_peak_ | 17.82             | - |
| chr1 | 8604544 | 8604601 | CSAR_peak_ | 10.95,6.95        | - |
| chr1 | 8605154 | 8605229 | CSAR_peak_ | 20.43             | - |
| chr1 | 8605313 | 8605346 | CSAR_peak_ | 8.39              | - |
| chr1 | 8605441 | 8605516 | CSAR_peak_ | 14.76,6.02        | - |
| chr1 | 8605615 | 8605707 | CSAR_peak_ | 7.06,7.92         | - |
| chr1 | 8605866 | 8605962 | CSAR_peak_ | 17.37             | - |

|      |         |         |            |               |   |
|------|---------|---------|------------|---------------|---|
| chr1 | 8606160 | 8606216 | CSAR_peak_ | 8.39          | - |
| chr1 | 8614689 | 8614780 | CSAR_peak_ | 20.07,6.57    | - |
| chr1 | 8614860 | 8614938 | CSAR_peak_ | 12.13,10.83,  | - |
| chr1 | 8617923 | 8617960 | CSAR_peak_ | 7.27          | - |
| chr1 | 8618124 | 8618211 | CSAR_peak_ | 9.58          | - |
| chr1 | 8619098 | 8619183 | CSAR_peak_ | 8.65          | - |
| chr1 | 8619309 | 8619370 | CSAR_peak_ | 8.65          | - |
| chr1 | 8619546 | 8619649 | CSAR_peak_ | 17.82,12.17   | - |
| chr1 | 8639141 | 8639184 | CSAR_peak_ | 5.86,6.21     | - |
| chr1 | 8686097 | 8686141 | CSAR_peak_ | 9.58          | - |
| chr1 | 8686341 | 8686381 | CSAR_peak_ | 6.21          | - |
| chr1 | 8686643 | 8686706 | CSAR_peak_ | 7.58          | - |
| chr1 | 8686919 | 8686944 | CSAR_peak_ | 7.27          | - |
| chr1 | 8687154 | 8687202 | CSAR_peak_ | 6.21          | - |
| chr1 | 8726582 | 8726659 | CSAR_peak_ | 14.88,10.02   | - |
| chr1 | 8756226 | 8756305 | CSAR_peak_ | 16.85,44.07,  | - |
| chr1 | 8756366 | 8756452 | CSAR_peak_ | 79.65,74.02,  | - |
| chr1 | 8837388 | 8837485 | CSAR_peak_ | 19.36,25.62   | - |
| chr1 | 8837622 | 8837702 | CSAR_peak_ | 7.27,5.86     | - |
| chr1 | 8838376 | 8838470 | CSAR_peak_ | 9.55,22.56,20 | - |
| chr1 | 8840598 | 8840654 | CSAR_peak_ | 10.96,11.63   | - |
| chr1 | 8840817 | 8840877 | CSAR_peak_ | 7.27,19.36    | - |
| chr1 | 8841266 | 8841303 | CSAR_peak_ | 8.52          | - |
| chr1 | 8841410 | 8841417 | CSAR_peak_ | 13.48         | - |
| chr1 | 8841419 | 8841563 | CSAR_peak_ | 8.39,8.52,6.8 | - |
| chr1 | 8841666 | 8841781 | CSAR_peak_ | 11.83,13.01   | - |
| chr1 | 8841935 | 8841996 | CSAR_peak_ | 6.85          | - |
| chr1 | 8842038 | 8842079 | CSAR_peak_ | 9.58,9.58     | - |
| chr1 | 8842179 | 8842238 | CSAR_peak_ | 15            | - |
| chr1 | 8854804 | 8854841 | CSAR_peak_ | 8.39          | - |
| chr1 | 8889693 | 8889733 | CSAR_peak_ | 6.21          | - |
| chr1 | 8889850 | 8889942 | CSAR_peak_ | 6.81,16.05,20 | - |
| chr1 | 8890389 | 8890419 | CSAR_peak_ | 12.13         | - |
| chr1 | 8890510 | 8890543 | CSAR_peak_ | 14.88         | - |
| chr1 | 8891052 | 8891090 | CSAR_peak_ | 6.21          | - |
| chr1 | 8891591 | 8891676 | CSAR_peak_ | 13.51,6.21,9. | - |
| chr1 | 8892709 | 8892787 | CSAR_peak_ | 7.27          | - |
| chr1 | 8892801 | 8892817 | CSAR_peak_ | 6.21          | - |
| chr1 | 8892906 | 8892968 | CSAR_peak_ | 6.21,12.13,6. | - |
| chr1 | 8893108 | 8893179 | CSAR_peak_ | 12.13,7.27    | - |
| chr1 | 8893385 | 8893430 | CSAR_peak_ | 10.83         | - |
| chr1 | 8898875 | 8898936 | CSAR_peak_ | 6.03,7.58     | - |



|      |         |         |             |                   |   |
|------|---------|---------|-------------|-------------------|---|
| chr1 | 8905839 | 8905953 | CSAR_peak_1 | 19.36,17.82       | - |
| chr1 | 8906548 | 8906611 | CSAR_peak_1 | 15.2              | - |
| chr1 | 8906641 | 8906696 | CSAR_peak_1 | 8.39              | - |
| chr1 | 8906814 | 8906964 | CSAR_peak_1 | 9.58,17.82,11.82  | - |
| chr1 | 8907207 | 8907293 | CSAR_peak_1 | 10.83             | - |
| chr1 | 8907512 | 8907608 | CSAR_peak_1 | 8.39,7.27         | - |
| chr1 | 8907666 | 8907772 | CSAR_peak_1 | 7.27,6.87,10.83   | - |
| chr1 | 8907835 | 8907877 | CSAR_peak_1 | 10.02             | - |
| chr1 | 8908008 | 8908061 | CSAR_peak_1 | 8.39              | - |
| chr1 | 8908148 | 8908211 | CSAR_peak_1 | 8.39,12.17        | - |
| chr1 | 8908221 | 8908258 | CSAR_peak_1 | 7.58              | - |
| chr1 | 8908696 | 8908757 | CSAR_peak_1 | 14.88             | - |
| chr1 | 8909720 | 8909752 | CSAR_peak_1 | 6.21              | - |
| chr1 | 8910034 | 8910083 | CSAR_peak_1 | 12.31             | - |
| chr1 | 8910336 | 8910377 | CSAR_peak_1 | 6.21              | - |
| chr1 | 8910477 | 8910714 | CSAR_peak_1 | 22.58,7.58,6.21   | - |
| chr1 | 8910733 | 8911126 | CSAR_peak_1 | 24.21,32.27,11.82 | - |
| chr1 | 8911173 | 8911249 | CSAR_peak_1 | 30.81,16.87       | - |
| chr1 | 8911367 | 8911468 | CSAR_peak_1 | 48.86,29.64       | - |
| chr1 | 8911507 | 8911560 | CSAR_peak_1 | 6,6.75            | - |
| chr1 | 8911572 | 8911792 | CSAR_peak_1 | 33.66,23.76,11.82 | - |
| chr1 | 8911800 | 8912024 | CSAR_peak_1 | 26.54,39.47       | - |
| chr1 | 8912096 | 8912157 | CSAR_peak_1 | 7.27              | - |
| chr1 | 8912173 | 8912271 | CSAR_peak_1 | 56.07,20.43       | - |
| chr1 | 8912277 | 8912361 | CSAR_peak_1 | 11.07,19.36       | - |
| chr1 | 8934508 | 8934547 | CSAR_peak_1 | 6.21              | - |
| chr1 | 8946236 | 8946297 | CSAR_peak_1 | 9.58              | - |
| chr1 | 8971862 | 8971920 | CSAR_peak_1 | 12.13,6.21        | - |
| chr1 | 8972189 | 8972247 | CSAR_peak_1 | 7.27              | - |
| chr1 | 8972487 | 8972581 | CSAR_peak_1 | 6.21,12.13        | - |
| chr1 | 8972906 | 8972983 | CSAR_peak_1 | 14.88,7.27        | - |
| chr1 | 8974400 | 8974472 | CSAR_peak_1 | 14.88             | - |
| chr1 | 8981901 | 8982065 | CSAR_peak_1 | 16.87,24.21,11.82 | - |
| chr1 | 8982123 | 8982601 | CSAR_peak_1 | 31.2,31.2,30.81   | - |
| chr1 | 8982654 | 8982861 | CSAR_peak_1 | 33.03,14.88,11.82 | - |
| chr1 | 8982930 | 8982990 | CSAR_peak_1 | 13.51,10.83       | - |
| chr1 | 8992114 | 8992169 | CSAR_peak_1 | 8.2               | - |
| chr1 | 8992211 | 8992282 | CSAR_peak_1 | 8.39              | - |
| chr1 | 8992725 | 8992803 | CSAR_peak_1 | 17.82,9.58        | - |
| chr1 | 9002648 | 9002805 | CSAR_peak_1 | 24.21,9.41        | - |
| chr1 | 9002846 | 9002886 | CSAR_peak_1 | 6.21              | - |
| chr1 | 9003045 | 9003134 | CSAR_peak_1 | 5.79              | - |

|      |         |         |            |                |   |
|------|---------|---------|------------|----------------|---|
| chr1 | 9003313 | 9003414 | CSAR_peak_ | 12.13,21.56    | - |
| chr1 | 9003545 | 9003654 | CSAR_peak_ | 23.49,24.21    | - |
| chr1 | 9003951 | 9004015 | CSAR_peak_ | 8.14,20.43     | - |
| chr1 | 9004024 | 9004101 | CSAR_peak_ | 12.13,14.88    | - |
| chr1 | 9004548 | 9004559 | CSAR_peak_ | 6.21           | - |
| chr1 | 9004589 | 9004606 | CSAR_peak_ | 6.21           | - |
| chr1 | 9024787 | 9024808 | CSAR_peak_ | 7.27,7.27      | - |
| chr1 | 9024947 | 9024992 | CSAR_peak_ | 8.39           | - |
| chr1 | 9025133 | 9025198 | CSAR_peak_ | 14.88          | - |
| chr1 | 9025298 | 9025361 | CSAR_peak_ | 6.81           | - |
| chr1 | 9025433 | 9025495 | CSAR_peak_ | 9.55           | - |
| chr1 | 9026616 | 9026702 | CSAR_peak_ | 12.17,13.48    | - |
| chr1 | 9027526 | 9027572 | CSAR_peak_ | 9.58           | - |
| chr1 | 9040095 | 9040170 | CSAR_peak_ | 13.44          | - |
| chr1 | 9040296 | 9040360 | CSAR_peak_ | 12.17          | - |
| chr1 | 9040393 | 9040444 | CSAR_peak_ | 7.73,27.64     | - |
| chr1 | 9040539 | 9040624 | CSAR_peak_ | 34.89          | - |
| chr1 | 9040939 | 9040985 | CSAR_peak_ | 6.21           | - |
| chr1 | 9041782 | 9041836 | CSAR_peak_ | 12.13          | - |
| chr1 | 9045275 | 9045320 | CSAR_peak_ | 9.58,8.65      | - |
| chr1 | 9045401 | 9045459 | CSAR_peak_ | 8.14           | - |
| chr1 | 9046484 | 9046528 | CSAR_peak_ | 7.58           | - |
| chr1 | 9067243 | 9067307 | CSAR_peak_ | 12.13          | - |
| chr1 | 9067747 | 9067816 | CSAR_peak_ | 6.95           | - |
| chr1 | 9069241 | 9069290 | CSAR_peak_ | 6.21           | - |
| chr1 | 9074769 | 9074816 | CSAR_peak_ | 7.27           | - |
| chr1 | 9074910 | 9074935 | CSAR_peak_ | 6.21           | - |
| chr1 | 9076047 | 9076165 | CSAR_peak_ | 10.31,36.01,4- | - |
| chr1 | 9076302 | 9076387 | CSAR_peak_ | 27.64,39.47,4- | - |
| chr1 | 9076444 | 9076603 | CSAR_peak_ | 19.51,35.17,4- | - |
| chr1 | 9089682 | 9089805 | CSAR_peak_ | 19.36,7.27     | - |
| chr1 | 9089830 | 9089892 | CSAR_peak_ | 16.11          | - |
| chr1 | 9089925 | 9089986 | CSAR_peak_ | 9.58           | - |
| chr1 | 9090134 | 9090218 | CSAR_peak_ | 12.13          | - |
| chr1 | 9090356 | 9090480 | CSAR_peak_ | 7.58,6.81      | - |
| chr1 | 9091509 | 9091651 | CSAR_peak_ | 6.81,5.86,20.- | - |
| chr1 | 9091762 | 9091819 | CSAR_peak_ | 9.58           | - |
| chr1 | 9091837 | 9091869 | CSAR_peak_ | 5.86           | - |
| chr1 | 9096176 | 9096208 | CSAR_peak_ | 7.27           | - |
| chr1 | 9121723 | 9121821 | CSAR_peak_ | 9.58           | - |
| chr1 | 9144995 | 9145050 | CSAR_peak_ | 7.27           | - |
| chr1 | 9207836 | 9207874 | CSAR_peak_ | 8.39           | - |

|      |         |         |            |                |   |
|------|---------|---------|------------|----------------|---|
| chr1 | 9209347 | 9209406 | CSAR_peak_ | {6.21,8.39     | - |
| chr1 | 9209709 | 9209797 | CSAR_peak_ | {7.27,9.58     | - |
| chr1 | 9250487 | 9250520 | CSAR_peak_ | {7.27          | - |
| chr1 | 9285622 | 9285714 | CSAR_peak_ | {8.39          | - |
| chr1 | 9285821 | 9285871 | CSAR_peak_ | {5.86          | - |
| chr1 | 9301214 | 9301229 | CSAR_peak_ | {6.44          | - |
| chr1 | 9301245 | 9301350 | CSAR_peak_ | {8.39,6.71     | - |
| chr1 | 9301462 | 9301524 | CSAR_peak_ | {10.83         | - |
| chr1 | 9301633 | 9301691 | CSAR_peak_ | {14.76,20.94   | - |
| chr1 | 9301729 | 9301861 | CSAR_peak_ | {12.74,6.44    | - |
| chr1 | 9301942 | 9302021 | CSAR_peak_ | {17.82,24.52   | - |
| chr1 | 9302104 | 9302180 | CSAR_peak_ | {7.27,24.21    | - |
| chr1 | 9302181 | 9302330 | CSAR_peak_ | {13.92         | - |
| chr1 | 9302690 | 9302702 | CSAR_peak_ | {17.51,10.31   | - |
| chr1 | 9302773 | 9302843 | CSAR_peak_ | {21.22,31.73,} | - |
| chr1 | 9302914 | 9302964 | CSAR_peak_ | {7.27          | - |
| chr1 | 9315867 | 9315905 | CSAR_peak_ | {6.21          | - |
| chr1 | 9316022 | 9316162 | CSAR_peak_ | {30.23,25.67,} | - |
| chr1 | 9404201 | 9404278 | CSAR_peak_ | {8.2           | - |
| chr1 | 9404379 | 9404398 | CSAR_peak_ | {6.21          | - |
| chr1 | 9407178 | 9407218 | CSAR_peak_ | {9.58          | - |
| chr1 | 9407245 | 9407302 | CSAR_peak_ | {8.28          | - |
| chr1 | 9407405 | 9407608 | CSAR_peak_ | {24.97,10.83,} | - |
| chr1 | 9407670 | 9407902 | CSAR_peak_ | {16.08,9.08,3} | - |
| chr1 | 9407922 | 9407985 | CSAR_peak_ | {9.58,16.33    | - |
| chr1 | 9408059 | 9408182 | CSAR_peak_ | {6.57,7.58     | - |
| chr1 | 9408185 | 9408327 | CSAR_peak_ | {9.77,10.95    | - |
| chr1 | 9408395 | 9408510 | CSAR_peak_ | {25.07,6.44    | - |
| chr1 | 9408542 | 9408607 | CSAR_peak_ | {9.77          | - |
| chr1 | 9408932 | 9408985 | CSAR_peak_ | {8.39,14.88    | - |
| chr1 | 9409184 | 9409234 | CSAR_peak_ | {6.21          | - |
| chr1 | 9409798 | 9409871 | CSAR_peak_ | {7.27          | - |
| chr1 | 9409979 | 9410056 | CSAR_peak_ | {7.27,10.02    | - |
| chr1 | 9410269 | 9410376 | CSAR_peak_ | {32.31,26.97   | - |
| chr1 | 9410446 | 9410500 | CSAR_peak_ | {10.83         | - |
| chr1 | 9410626 | 9410883 | CSAR_peak_ | {7.27,12.13,1} | - |
| chr1 | 9410928 | 9411032 | CSAR_peak_ | {13.48,12.17   | - |
| chr1 | 9446106 | 9446157 | CSAR_peak_ | {7.27          | - |
| chr1 | 9446946 | 9447014 | CSAR_peak_ | {10.83         | - |
| chr1 | 9447123 | 9447176 | CSAR_peak_ | {7.58          | - |
| chr1 | 9447223 | 9447279 | CSAR_peak_ | {9.58          | - |
| chr1 | 9447508 | 9447561 | CSAR_peak_ | {7.27          | - |

|      |         |         |             |             |   |
|------|---------|---------|-------------|-------------|---|
| chr1 | 9447627 | 9447708 | CSAR_peak_1 | 7.58        | - |
| chr1 | 9447771 | 9447817 | CSAR_peak_1 | 9.58        | - |
| chr1 | 9447908 | 9447952 | CSAR_peak_1 | 8.13        | - |
| chr1 | 9448054 | 9448167 | CSAR_peak_1 | 10.83,7.27  | - |
| chr1 | 9449845 | 9449931 | CSAR_peak_1 | 14.88,19.36 | - |
| chr1 | 9449942 | 9450034 | CSAR_peak_1 | 12.13,13.44 | - |
| chr1 | 9450446 | 9450615 | CSAR_peak_1 | 38.71,19.36 | - |
| chr1 | 9450756 | 9450916 | CSAR_peak_1 | 17.82,12.74 | - |
| chr1 | 9450946 | 9450988 | CSAR_peak_1 | 6.1         | - |
| chr1 | 9507216 | 9507258 | CSAR_peak_1 | 9.58        | - |
| chr1 | 9509797 | 9509832 | CSAR_peak_1 | 6.21        | - |
| chr1 | 9521389 | 9521468 | CSAR_peak_1 | 6.81,8.65   | - |
| chr1 | 9524988 | 9525046 | CSAR_peak_1 | 8.39,7.27   | - |
| chr1 | 9525221 | 9525276 | CSAR_peak_1 | 9.58        | - |
| chr1 | 9525817 | 9525877 | CSAR_peak_1 | 14.88       | - |
| chr1 | 9553301 | 9553369 | CSAR_peak_1 | 7.27        | - |
| chr1 | 9555142 | 9555218 | CSAR_peak_1 | 14.88       | - |
| chr1 | 9555523 | 9555548 | CSAR_peak_1 | 7.27,10.31  | - |
| chr1 | 9555623 | 9555693 | CSAR_peak_1 | 35.83,10.83 | - |
| chr1 | 9556166 | 9556221 | CSAR_peak_1 | 7.27        | - |
| chr1 | 9556516 | 9556595 | CSAR_peak_1 | 8.65        | - |
| chr1 | 9556674 | 9556745 | CSAR_peak_1 | 12.13       | - |
| chr1 | 9557028 | 9557107 | CSAR_peak_1 | 8.39,6.81   | - |
| chr1 | 9557189 | 9557272 | CSAR_peak_1 | 10.83       | - |
| chr1 | 9557622 | 9557669 | CSAR_peak_1 | 9.58        | - |
| chr1 | 9557747 | 9557798 | CSAR_peak_1 | 7.34        | - |
| chr1 | 9605214 | 9605285 | CSAR_peak_1 | 6.22        | - |
| chr1 | 9639724 | 9639768 | CSAR_peak_1 | 9.58        | - |
| chr1 | 9640589 | 9640705 | CSAR_peak_1 | 10.94,6.21  | - |
| chr1 | 9640823 | 9640868 | CSAR_peak_1 | 7.58        | - |
| chr1 | 9640872 | 9640895 | CSAR_peak_1 | 6.21        | - |
| chr1 | 9641099 | 9641190 | CSAR_peak_1 | 12.31,9.58  | - |
| chr1 | 9641393 | 9641494 | CSAR_peak_1 | 14.25       | - |
| chr1 | 9642398 | 9642448 | CSAR_peak_1 | 7.27,10.83  | - |
| chr1 | 9643324 | 9643379 | CSAR_peak_1 | 16.19,7.27  | - |
| chr1 | 9643450 | 9643493 | CSAR_peak_1 | 7.27        | - |
| chr1 | 9643617 | 9643672 | CSAR_peak_1 | 7.27        | - |
| chr1 | 9643734 | 9643918 | CSAR_peak_1 | 35.24,29.2  | - |
| chr1 | 9643966 | 9644040 | CSAR_peak_1 | 21.31,6.03  | - |
| chr1 | 9644058 | 9644168 | CSAR_peak_1 | 14.88,13.51 | - |
| chr1 | 9644204 | 9644225 | CSAR_peak_1 | 11.14       | - |
| chr1 | 9644241 | 9644281 | CSAR_peak_1 | 5.86        | - |

|      |         |         |             |                 |   |
|------|---------|---------|-------------|-----------------|---|
| chr1 | 9644344 | 9644383 | CSAR_peak_1 | 7.73            | - |
| chr1 | 9644523 | 9644597 | CSAR_peak_1 | 8.39            | - |
| chr1 | 9644646 | 9644692 | CSAR_peak_1 | 8.39,6.21       | - |
| chr1 | 9644972 | 9645040 | CSAR_peak_1 | 10.83           | - |
| chr1 | 9645435 | 9645506 | CSAR_peak_1 | 6.1             | - |
| chr1 | 9645678 | 9645778 | CSAR_peak_1 | 11.38,9.77      | - |
| chr1 | 9645923 | 9646093 | CSAR_peak_1 | 13.44,5.86,1.1  | - |
| chr1 | 9646208 | 9646293 | CSAR_peak_1 | 7.27            | - |
| chr1 | 9646454 | 9646840 | CSAR_peak_1 | 17.82,16.11,1.1 | - |
| chr1 | 9646985 | 9647063 | CSAR_peak_1 | 7.27,8.39       | - |
| chr1 | 9647085 | 9647245 | CSAR_peak_1 | 13.48,20.43     | - |
| chr1 | 9647528 | 9647704 | CSAR_peak_1 | 25.91,7.27,6.1  | - |
| chr1 | 9647922 | 9647973 | CSAR_peak_1 | 12.13           | - |
| chr1 | 9648211 | 9648304 | CSAR_peak_1 | 20.35,42.05     | - |
| chr1 | 9648330 | 9648404 | CSAR_peak_1 | 40.54,33.81     | - |
| chr1 | 9648419 | 9648701 | CSAR_peak_1 | 39.3,64.06,1.1  | - |
| chr1 | 9648704 | 9648770 | CSAR_peak_1 | 10.83,12.31     | - |
| chr1 | 9648776 | 9648934 | CSAR_peak_1 | 19.36,18.61     | - |
| chr1 | 9648961 | 9649041 | CSAR_peak_1 | 13.84,12.12     | - |
| chr1 | 9672004 | 9672071 | CSAR_peak_1 | 7.58            | - |
| chr1 | 9672154 | 9672161 | CSAR_peak_1 | 6.21            | - |
| chr1 | 9672250 | 9672369 | CSAR_peak_1 | 13.44,8.09      | - |
| chr1 | 9672451 | 9672518 | CSAR_peak_1 | 12.74           | - |
| chr1 | 9672550 | 9672590 | CSAR_peak_1 | 5.86            | - |
| chr1 | 9672665 | 9672702 | CSAR_peak_1 | 7.27            | - |
| chr1 | 9672793 | 9672836 | CSAR_peak_1 | 16.33,9.61      | - |
| chr1 | 9672948 | 9673194 | CSAR_peak_1 | 12.13,15.64,1.1 | - |
| chr1 | 9673281 | 9673520 | CSAR_peak_1 | 20.94,24.21     | - |
| chr1 | 9673596 | 9673651 | CSAR_peak_1 | 6.95            | - |
| chr1 | 9673748 | 9673791 | CSAR_peak_1 | 8.65,7.27       | - |
| chr1 | 9673794 | 9673952 | CSAR_peak_1 | 12.6,29.2       | - |
| chr1 | 9674062 | 9674115 | CSAR_peak_1 | 9.58            | - |
| chr1 | 9674129 | 9674272 | CSAR_peak_1 | 16.33,12.17     | - |
| chr1 | 9674317 | 9674377 | CSAR_peak_1 | 12.17,13.48     | - |
| chr1 | 9674445 | 9674541 | CSAR_peak_1 | 9.77,24.21      | - |
| chr1 | 9674557 | 9674620 | CSAR_peak_1 | 7.27,8.28       | - |
| chr1 | 9674711 | 9674922 | CSAR_peak_1 | 31.72,30.81,1.1 | - |
| chr1 | 9675004 | 9675079 | CSAR_peak_1 | 22.33,10.62     | - |
| chr1 | 9675088 | 9675265 | CSAR_peak_1 | 24.52,25.1      | - |
| chr1 | 9675354 | 9675364 | CSAR_peak_1 | 6.85            | - |
| chr1 | 9675834 | 9675970 | CSAR_peak_1 | 19.36,19.96,1.1 | - |
| chr1 | 9675977 | 9676063 | CSAR_peak_1 | 28.34,10.94     | - |

|      |         |         |             |                 |   |
|------|---------|---------|-------------|-----------------|---|
| chr1 | 9693673 | 9693762 | CSAR_peak_1 | 9.58            | - |
| chr1 | 9715871 | 9715909 | CSAR_peak_1 | 7.27            | - |
| chr1 | 9717429 | 9717476 | CSAR_peak_1 | 6.21,6.57,5.8   | - |
| chr1 | 9717848 | 9717911 | CSAR_peak_1 | 20.43,9.58      | - |
| chr1 | 9719934 | 9720015 | CSAR_peak_1 | 25.91,25.91     | - |
| chr1 | 9722144 | 9722269 | CSAR_peak_1 | 7.58            | - |
| chr1 | 9723074 | 9723139 | CSAR_peak_1 | 6.21            | - |
| chr1 | 9724542 | 9724638 | CSAR_peak_1 | 21.56,17.82     | - |
| chr1 | 9726971 | 9727039 | CSAR_peak_1 | 16.33           | - |
| chr1 | 9727136 | 9727198 | CSAR_peak_1 | 17.82           | - |
| chr1 | 9727235 | 9727298 | CSAR_peak_1 | 16.33           | - |
| chr1 | 9727374 | 9727642 | CSAR_peak_1 | 27.73,6.02,10.1 | - |
| chr1 | 9727688 | 9727730 | CSAR_peak_1 | 7.27            | - |
| chr1 | 9728337 | 9728381 | CSAR_peak_1 | 8.14,7.27       | - |
| chr1 | 9728403 | 9728499 | CSAR_peak_1 | 13.66,15.56     | - |
| chr1 | 9728565 | 9728645 | CSAR_peak_1 | 14.76           | - |
| chr1 | 9728759 | 9728833 | CSAR_peak_1 | 21.94,7.73      | - |
| chr1 | 9728999 | 9729124 | CSAR_peak_1 | 11.66,13.6      | - |
| chr1 | 9729133 | 9729240 | CSAR_peak_1 | 35.83,38.23     | - |
| chr1 | 9729662 | 9729748 | CSAR_peak_1 | 24.21           | - |
| chr1 | 9729856 | 9729980 | CSAR_peak_1 | 33.38,22.52     | - |
| chr1 | 9730229 | 9730313 | CSAR_peak_1 | 16.08,22.58     | - |
| chr1 | 9730572 | 9730697 | CSAR_peak_1 | 25.91           | - |
| chr1 | 9730869 | 9730934 | CSAR_peak_1 | 13.85,14.88     | - |
| chr1 | 9730948 | 9731010 | CSAR_peak_1 | 50.81,9.58      | - |
| chr1 | 9731096 | 9731149 | CSAR_peak_1 | 9.58,14.88      | - |
| chr1 | 9731190 | 9731277 | CSAR_peak_1 | 9.77,20.43      | - |
| chr1 | 9731512 | 9731547 | CSAR_peak_1 | 7.27            | - |
| chr1 | 9731605 | 9731816 | CSAR_peak_1 | 29.69,21.56     | - |
| chr1 | 9732350 | 9732405 | CSAR_peak_1 | 9.58            | - |
| chr1 | 9775984 | 9776072 | CSAR_peak_1 | 5.86,7.27,5.8   | - |
| chr1 | 9776165 | 9776237 | CSAR_peak_1 | 8.65,9.58       | - |
| chr1 | 9776621 | 9776722 | CSAR_peak_1 | 8.39,24.17      | - |
| chr1 | 9776911 | 9777111 | CSAR_peak_1 | 17.51,9.77,10.1 | - |
| chr1 | 9777126 | 9777250 | CSAR_peak_1 | 12.31           | - |
| chr1 | 9777635 | 9777670 | CSAR_peak_1 | 12.13           | - |
| chr1 | 9829349 | 9829393 | CSAR_peak_1 | 6.94            | - |
| chr1 | 9831988 | 9832043 | CSAR_peak_1 | 7.27            | - |
| chr1 | 9833014 | 9833087 | CSAR_peak_1 | 16.33           | - |
| chr1 | 9833308 | 9833346 | CSAR_peak_1 | 8.65            | - |
| chr1 | 9850471 | 9850562 | CSAR_peak_1 | 7.27,6.21       | - |
| chr1 | 9850778 | 9850822 | CSAR_peak_1 | 9.58            | - |

|      |          |          |            |                |   |
|------|----------|----------|------------|----------------|---|
| chr1 | 9868722  | 9868752  | CSAR_peak_ | 7.27           | - |
| chr1 | 9869168  | 9869205  | CSAR_peak_ | 6.21           | - |
| chr1 | 9869854  | 9869928  | CSAR_peak_ | 25.91          | - |
| chr1 | 9870471  | 9870531  | CSAR_peak_ | 12.13          | - |
| chr1 | 9871024  | 9871064  | CSAR_peak_ | 10.83          | - |
| chr1 | 9886056  | 9886114  | CSAR_peak_ | 7.27           | - |
| chr1 | 9886272  | 9886318  | CSAR_peak_ | 7.27           | - |
| chr1 | 9886430  | 9886466  | CSAR_peak_ | 6.21           | - |
| chr1 | 9886532  | 9886588  | CSAR_peak_ | 36.78,12.5     | - |
| chr1 | 9887210  | 9887333  | CSAR_peak_ | 9.58,9.77      | - |
| chr1 | 9921252  | 9921284  | CSAR_peak_ | 7.27           | - |
| chr1 | 9921927  | 9921976  | CSAR_peak_ | 10.83          | - |
| chr1 | 9922099  | 9922207  | CSAR_peak_ | 6.21,8.39      | - |
| chr1 | 9922394  | 9922451  | CSAR_peak_ | 9.58           | - |
| chr1 | 9922580  | 9922619  | CSAR_peak_ | 8.14           | - |
| chr1 | 9923248  | 9923311  | CSAR_peak_ | 7.27           | - |
| chr1 | 9924259  | 9924346  | CSAR_peak_ | 8.14,9.58      | - |
| chr1 | 9933462  | 9933527  | CSAR_peak_ | 12.13,9.58     | - |
| chr1 | 9933681  | 9933763  | CSAR_peak_ | 20.94,7.92     | - |
| chr1 | 9933812  | 9933891  | CSAR_peak_ | 16.33,8.39,6.- | - |
| chr1 | 9933935  | 9934101  | CSAR_peak_ | 17.82,17.82,1- | - |
| chr1 | 9934258  | 9934404  | CSAR_peak_ | 35.83,6.91,4:- | - |
| chr1 | 9934451  | 9934532  | CSAR_peak_ | 13.02,22.58    | - |
| chr1 | 9934537  | 9934595  | CSAR_peak_ | 13.01,13       | - |
| chr1 | 9934613  | 9934765  | CSAR_peak_ | 22.58,11.75    | - |
| chr1 | 9934786  | 9934884  | CSAR_peak_ | 33.47,14.88    | - |
| chr1 | 9934900  | 9934970  | CSAR_peak_ | 12.12,16.55    | - |
| chr1 | 9934998  | 9935251  | CSAR_peak_ | 12.59,13.48,1- | - |
| chr1 | 9955634  | 9955723  | CSAR_peak_ | 24.21,10.83    | - |
| chr1 | 9955814  | 9955913  | CSAR_peak_ | 14.88,12.13    | - |
| chr1 | 9956253  | 9956310  | CSAR_peak_ | 7.27,9.58      | - |
| chr1 | 9956418  | 9956470  | CSAR_peak_ | 17.82,8.92     | - |
| chr1 | 9956554  | 9956777  | CSAR_peak_ | 21.37,31.2,2:- | - |
| chr1 | 9956795  | 9956874  | CSAR_peak_ | 14.76,20.43    | - |
| chr1 | 9973281  | 9973347  | CSAR_peak_ | 7.27,7.27      | - |
| chr1 | 10013966 | 10014020 | CSAR_peak_ | 7.27           | - |
| chr1 | 10044548 | 10044629 | CSAR_peak_ | 6.21           | - |
| chr1 | 10044690 | 10044758 | CSAR_peak_ | 12.13,6.21     | - |
| chr1 | 10044760 | 10044836 | CSAR_peak_ | 7.58,10.02     | - |
| chr1 | 10045062 | 10045113 | CSAR_peak_ | 7.27           | - |
| chr1 | 10045193 | 10045266 | CSAR_peak_ | 11.38          | - |
| chr1 | 10045348 | 10045461 | CSAR_peak_ | 10.95,13.85    | - |

|      |          |          |             |               |   |
|------|----------|----------|-------------|---------------|---|
| chr1 | 10051710 | 10051761 | CSAR_peak_1 | 6.44          | - |
| chr1 | 10052137 | 10052175 | CSAR_peak_1 | 7.29          | - |
| chr1 | 10052254 | 10052273 | CSAR_peak_1 | 9.77          | - |
| chr1 | 10052821 | 10052869 | CSAR_peak_1 | 7,16.33       | - |
| chr1 | 10056793 | 10056834 | CSAR_peak_1 | 8.39          | - |
| chr1 | 10072275 | 10072318 | CSAR_peak_1 | 6.21          | - |
| chr1 | 10105672 | 10105722 | CSAR_peak_1 | 6.21          | - |
| chr1 | 10107953 | 10108062 | CSAR_peak_1 | 7.27          | - |
| chr1 | 10110205 | 10110298 | CSAR_peak_1 | 6.85          | - |
| chr1 | 10110454 | 10110467 | CSAR_peak_1 | 6.22          | - |
| chr1 | 10151666 | 10151795 | CSAR_peak_1 | 43.48,17.33,- | - |
| chr1 | 10247946 | 10247992 | CSAR_peak_1 | 7.27          | - |
| chr1 | 10248959 | 10249016 | CSAR_peak_1 | 7.27          | - |
| chr1 | 10269639 | 10269691 | CSAR_peak_1 | 6.95,9.77     | - |
| chr1 | 10270411 | 10270483 | CSAR_peak_1 | 6.87          | - |
| chr1 | 10270495 | 10270546 | CSAR_peak_1 | 6.21          | - |
| chr1 | 10271239 | 10271299 | CSAR_peak_1 | 9.58,7.27     | - |
| chr1 | 10271496 | 10271541 | CSAR_peak_1 | 7.27,6.21     | - |
| chr1 | 10274141 | 10274267 | CSAR_peak_1 | 17.82,16.11,- | - |
| chr1 | 10274681 | 10274760 | CSAR_peak_1 | 12.13         | - |
| chr1 | 10278958 | 10279010 | CSAR_peak_1 | 6.95,9.77     | - |
| chr1 | 10279730 | 10279802 | CSAR_peak_1 | 6.87          | - |
| chr1 | 10279814 | 10279865 | CSAR_peak_1 | 6.21          | - |
| chr1 | 10280556 | 10280616 | CSAR_peak_1 | 9.58,7.27     | - |
| chr1 | 10280621 | 10280679 | CSAR_peak_1 | 7.27          | - |
| chr1 | 10280813 | 10280865 | CSAR_peak_1 | 12.13         | - |
| chr1 | 10281454 | 10281517 | CSAR_peak_1 | 7.27          | - |
| chr1 | 10283913 | 10284100 | CSAR_peak_1 | 16.33,12.59,- | - |
| chr1 | 10284123 | 10284304 | CSAR_peak_1 | 12.74,25.34,- | - |
| chr1 | 10284865 | 10284946 | CSAR_peak_1 | 7.27          | - |
| chr1 | 10285418 | 10285637 | CSAR_peak_1 | 7.92,23.03,1- | - |
| chr1 | 10285780 | 10285840 | CSAR_peak_1 | 12.17         | - |
| chr1 | 10286088 | 10286160 | CSAR_peak_1 | 14.88         | - |
| chr1 | 10286906 | 10287034 | CSAR_peak_1 | 10.83,10.52   | - |
| chr1 | 10287045 | 10287095 | CSAR_peak_1 | 5.86          | - |
| chr1 | 10287374 | 10287424 | CSAR_peak_1 | 9.58          | - |
| chr1 | 10287450 | 10287577 | CSAR_peak_1 | 9.58,13.44,7- | - |
| chr1 | 10287617 | 10287688 | CSAR_peak_1 | 8.44,28.34    | - |
| chr1 | 10287702 | 10287790 | CSAR_peak_1 | 14.76,12.13   | - |
| chr1 | 10287824 | 10287892 | CSAR_peak_1 | 14.76         | - |
| chr1 | 10288004 | 10288197 | CSAR_peak_1 | 16.11,14.88   | - |
| chr1 | 10288593 | 10288674 | CSAR_peak_1 | 9.48,20.43,6- | - |



|      |          |          |             |                 |   |
|------|----------|----------|-------------|-----------------|---|
| chr1 | 10288764 | 10288778 | CSAR_peak_1 | 6.21            | - |
| chr1 | 10288816 | 10288835 | CSAR_peak_1 | 6.57            | - |
| chr1 | 10288910 | 10289040 | CSAR_peak_1 | 29.69,10.82,4.1 | - |
| chr1 | 10289167 | 10289231 | CSAR_peak_1 | 9.58,9.58       | - |
| chr1 | 10289287 | 10289473 | CSAR_peak_1 | 8.7,9.55,24.2   | - |
| chr1 | 10289484 | 10289550 | CSAR_peak_1 | 9.58,7.92       | - |
| chr1 | 10289912 | 10289962 | CSAR_peak_1 | 7.27            | - |
| chr1 | 10290440 | 10290535 | CSAR_peak_1 | 7.73,8.39       | - |
| chr1 | 10290561 | 10290741 | CSAR_peak_1 | 19.36,17.82     | - |
| chr1 | 10290906 | 10290973 | CSAR_peak_1 | 13.48           | - |
| chr1 | 10291015 | 10291100 | CSAR_peak_1 | 19.98,21.94     | - |
| chr1 | 10291101 | 10291161 | CSAR_peak_1 | 8.14,6.21,8.2   | - |
| chr1 | 10291194 | 10291251 | CSAR_peak_1 | 9.58,17.82      | - |
| chr1 | 10291296 | 10291340 | CSAR_peak_1 | 8.65            | - |
| chr1 | 10291388 | 10291488 | CSAR_peak_1 | 11.96,16.19     | - |
| chr1 | 10291607 | 10291702 | CSAR_peak_1 | 6.21            | - |
| chr1 | 10291704 | 10291759 | CSAR_peak_1 | 8.39            | - |
| chr1 | 10291924 | 10291972 | CSAR_peak_1 | 6.21            | - |
| chr1 | 10292026 | 10292142 | CSAR_peak_1 | 22.06,24.64,4.1 | - |
| chr1 | 10292175 | 10292287 | CSAR_peak_1 | 20.21,6.71      | - |
| chr1 | 10292326 | 10292498 | CSAR_peak_1 | 10.68,20.18,4.1 | - |
| chr1 | 10292550 | 10292848 | CSAR_peak_1 | 33.03,12.17,4.1 | - |
| chr1 | 10292927 | 10292973 | CSAR_peak_1 | 7.27            | - |
| chr1 | 10293054 | 10293168 | CSAR_peak_1 | 19.36,16.05     | - |
| chr1 | 10293235 | 10293263 | CSAR_peak_1 | 5.9             | - |
| chr1 | 10293301 | 10293334 | CSAR_peak_1 | 7.13            | - |
| chr1 | 10293342 | 10293508 | CSAR_peak_1 | 23.03,21.56     | - |
| chr1 | 10293660 | 10293720 | CSAR_peak_1 | 6.85,7.27       | - |
| chr1 | 10294381 | 10294470 | CSAR_peak_1 | 40.66,18.95     | - |
| chr1 | 10310383 | 10310445 | CSAR_peak_1 | 9.58            | - |
| chr1 | 10311101 | 10311265 | CSAR_peak_1 | 10.31           | - |
| chr1 | 10311485 | 10311557 | CSAR_peak_1 | 13.51,10.83     | - |
| chr1 | 10311745 | 10311759 | CSAR_peak_1 | 14.88,9.58      | - |
| chr1 | 10311845 | 10311887 | CSAR_peak_1 | 13.44,17.82     | - |
| chr1 | 10312070 | 10312110 | CSAR_peak_1 | 9.58            | - |
| chr1 | 10312666 | 10312704 | CSAR_peak_1 | 7.27            | - |
| chr1 | 10312790 | 10312968 | CSAR_peak_1 | 20.94,20.05     | - |
| chr1 | 10313005 | 10313111 | CSAR_peak_1 | 13.48           | - |
| chr1 | 10313127 | 10313218 | CSAR_peak_1 | 9.77            | - |
| chr1 | 10313369 | 10313408 | CSAR_peak_1 | 7.27            | - |
| chr1 | 10377954 | 10378123 | CSAR_peak_1 | 12.27,17.82,4.1 | - |
| chr1 | 10378125 | 10378167 | CSAR_peak_1 | 6.21            | - |

|      |          |          |            |                   |   |
|------|----------|----------|------------|-------------------|---|
| chr1 | 10378392 | 10378479 | CSAR_peak_ | 14.88             | - |
| chr1 | 10378514 | 10378590 | CSAR_peak_ | 28.34,14.88       | - |
| chr1 | 10378886 | 10378967 | CSAR_peak_ | 9.58,8.39         | - |
| chr1 | 10379054 | 10379126 | CSAR_peak_ | 7.27              | - |
| chr1 | 10379275 | 10379504 | CSAR_peak_ | 42.94,40.38       | - |
| chr1 | 10379591 | 10379704 | CSAR_peak_ | 12.17,12.13       | - |
| chr1 | 10379768 | 10379818 | CSAR_peak_ | 6.21              | - |
| chr1 | 10379878 | 10380054 | CSAR_peak_ | 21.94,6.81        | - |
| chr1 | 10380080 | 10380174 | CSAR_peak_ | 21.94,10.47       | - |
| chr1 | 10380260 | 10380323 | CSAR_peak_ | 16.19,5.62,16.19  | - |
| chr1 | 10380379 | 10380452 | CSAR_peak_ | 16.33             | - |
| chr1 | 10380504 | 10380648 | CSAR_peak_ | 25.07,9.55,16.19  | - |
| chr1 | 10380680 | 10380757 | CSAR_peak_ | 19.36,6.57        | - |
| chr1 | 10380966 | 10381016 | CSAR_peak_ | 12.31,9.58        | - |
| chr1 | 10381086 | 10381271 | CSAR_peak_ | 19.15,9.55,21.94  | - |
| chr1 | 10381574 | 10381642 | CSAR_peak_ | 25.07,21.94       | - |
| chr1 | 10381820 | 10381884 | CSAR_peak_ | 32.46,12.31       | - |
| chr1 | 10418416 | 10418471 | CSAR_peak_ | 6.21              | - |
| chr1 | 10460529 | 10460567 | CSAR_peak_ | 7.27              | - |
| chr1 | 10472977 | 10473015 | CSAR_peak_ | 8.65              | - |
| chr1 | 10474254 | 10474295 | CSAR_peak_ | 6.03              | - |
| chr1 | 10475384 | 10475414 | CSAR_peak_ | 6.21              | - |
| chr1 | 10484684 | 10484751 | CSAR_peak_ | 7.27              | - |
| chr1 | 10485781 | 10485831 | CSAR_peak_ | 6.21              | - |
| chr1 | 10498639 | 10498715 | CSAR_peak_ | 13.48,6.21        | - |
| chr1 | 10498765 | 10498800 | CSAR_peak_ | 13.48             | - |
| chr1 | 10498970 | 10498982 | CSAR_peak_ | 7.27,9.58         | - |
| chr1 | 10499158 | 10499258 | CSAR_peak_ | 5.86,16.08,16.19  | - |
| chr1 | 10499359 | 10499417 | CSAR_peak_ | 10.02,20.13,16.19 | - |
| chr1 | 10500120 | 10500184 | CSAR_peak_ | 7.27              | - |
| chr1 | 10502621 | 10502683 | CSAR_peak_ | 13.41,25.57       | - |
| chr1 | 10502709 | 10502764 | CSAR_peak_ | 19.07,19.57,16.19 | - |
| chr1 | 10627388 | 10627439 | CSAR_peak_ | 6.21              | - |
| chr1 | 10662861 | 10662904 | CSAR_peak_ | 10.83             | - |
| chr1 | 10686142 | 10686222 | CSAR_peak_ | 20.43,10.31       | - |
| chr1 | 10686423 | 10686516 | CSAR_peak_ | 11.07,22.52       | - |
| chr1 | 10686566 | 10686659 | CSAR_peak_ | 9.58              | - |
| chr1 | 10686951 | 10687008 | CSAR_peak_ | 10.83             | - |
| chr1 | 10687126 | 10687176 | CSAR_peak_ | 7.27              | - |
| chr1 | 10687816 | 10687897 | CSAR_peak_ | 7.27,8.39         | - |
| chr1 | 10688100 | 10688219 | CSAR_peak_ | 13.48,10.83,16.19 | - |
| chr1 | 10688258 | 10688380 | CSAR_peak_ | 17.63,66.91       | - |

|      |          |          |            |                |
|------|----------|----------|------------|----------------|
| chr1 | 10688401 | 10688546 | CSAR_peak_ | 13.29,31.73,-  |
| chr1 | 10688548 | 10688653 | CSAR_peak_ | 9.48,9.58,5.8- |
| chr1 | 10688732 | 10688807 | CSAR_peak_ | 14.88,7.27 -   |
| chr1 | 10688872 | 10688968 | CSAR_peak_ | 19.36,7.58 -   |
| chr1 | 10689046 | 10689135 | CSAR_peak_ | 18.95,24.52 -  |
| chr1 | 10689221 | 10689371 | CSAR_peak_ | 11.07,7.27,8.- |
| chr1 | 10689376 | 10689543 | CSAR_peak_ | 6.21,11.03,14- |
| chr1 | 10689595 | 10689693 | CSAR_peak_ | 6.21,10.62 -   |
| chr1 | 10689876 | 10689957 | CSAR_peak_ | 9.58,8.14 -    |
| chr1 | 10690096 | 10690138 | CSAR_peak_ | 16.33 -        |
| chr1 | 10690256 | 10690358 | CSAR_peak_ | 17.37,17.52 -  |
| chr1 | 10690608 | 10690646 | CSAR_peak_ | 8.39 -         |
| chr1 | 10690715 | 10690791 | CSAR_peak_ | 11.38,13.48 -  |
| chr1 | 10796996 | 10797037 | CSAR_peak_ | 10.83,8.39 -   |
| chr1 | 10797221 | 10797286 | CSAR_peak_ | 7.27 -         |
| chr1 | 10797601 | 10797682 | CSAR_peak_ | 7.78,21.26 -   |
| chr1 | 10798185 | 10798230 | CSAR_peak_ | 7.27 -         |
| chr1 | 10798321 | 10798403 | CSAR_peak_ | 13.44,6.57 -   |
| chr1 | 10798890 | 10798940 | CSAR_peak_ | 7.34 -         |
| chr1 | 10799045 | 10799158 | CSAR_peak_ | 14.88,9.58,10- |
| chr1 | 10799249 | 10799293 | CSAR_peak_ | 14.76 -        |
| chr1 | 10799315 | 10799340 | CSAR_peak_ | 14.88,9.58 -   |
| chr1 | 10799435 | 10799489 | CSAR_peak_ | 14.88,17.82 -  |
| chr1 | 10799886 | 10799989 | CSAR_peak_ | 11.99,8.65 -   |
| chr1 | 10800524 | 10800555 | CSAR_peak_ | 7.27 -         |
| chr1 | 10818167 | 10818211 | CSAR_peak_ | 7.27 -         |
| chr1 | 10832248 | 10832299 | CSAR_peak_ | 12.13,14.88 -  |
| chr1 | 10833120 | 10833165 | CSAR_peak_ | 6.21 -         |
| chr1 | 10833770 | 10833829 | CSAR_peak_ | 14.88 -        |
| chr1 | 10833850 | 10833862 | CSAR_peak_ | 8.39 -         |
| chr1 | 10833961 | 10834047 | CSAR_peak_ | 9.77,15.9 -    |
| chr1 | 10836079 | 10836144 | CSAR_peak_ | 13.29,8.65 -   |
| chr1 | 10837143 | 10837196 | CSAR_peak_ | 17.52,11.14 -  |
| chr1 | 10837289 | 10837336 | CSAR_peak_ | 10.02,8.13 -   |
| chr1 | 10837482 | 10837557 | CSAR_peak_ | 12.13 -        |
| chr1 | 10837870 | 10837914 | CSAR_peak_ | 14.88,12.17 -  |
| chr1 | 10838176 | 10838266 | CSAR_peak_ | 6.21,9.58,5.8- |
| chr1 | 10838347 | 10838458 | CSAR_peak_ | 7.27,18.35 -   |
| chr1 | 10838550 | 10838603 | CSAR_peak_ | 14.76,8.39,14- |
| chr1 | 10838731 | 10838800 | CSAR_peak_ | 19.36,17.82 -  |
| chr1 | 10838865 | 10838950 | CSAR_peak_ | 16.33,5.86,6.- |
| chr1 | 10839218 | 10839301 | CSAR_peak_ | 9.58,7.27 -    |

|      |          |          |            |                |   |
|------|----------|----------|------------|----------------|---|
| chr1 | 10839413 | 10839594 | CSAR_peak_ | 10.83,8.39     | - |
| chr1 | 10859486 | 10859560 | CSAR_peak_ | 12.13,14.88    | - |
| chr1 | 10860008 | 10860063 | CSAR_peak_ | 7.27           | - |
| chr1 | 10906071 | 10906127 | CSAR_peak_ | 7.27           | - |
| chr1 | 10906463 | 10906492 | CSAR_peak_ | 6.02           | - |
| chr1 | 10907287 | 10907310 | CSAR_peak_ | 6.02           | - |
| chr1 | 10907386 | 10907484 | CSAR_peak_ | 8.39,5.86,12.  | - |
| chr1 | 10907784 | 10907838 | CSAR_peak_ | 14.88,7.58     | - |
| chr1 | 10939418 | 10939479 | CSAR_peak_ | 20.94,6.21     | - |
| chr1 | 10940221 | 10940346 | CSAR_peak_ | 5.86,7.26,9.5- | - |
| chr1 | 10940713 | 10940758 | CSAR_peak_ | 7.27           | - |
| chr1 | 10941014 | 10941076 | CSAR_peak_ | 16.33,9.58     | - |
| chr1 | 10945285 | 10945440 | CSAR_peak_ | 16.33,9.58     | - |
| chr1 | 10945586 | 10945610 | CSAR_peak_ | 20.94,10.02    | - |
| chr1 | 10945697 | 10945836 | CSAR_peak_ | 14.88,25.91    | - |
| chr1 | 10945838 | 10945932 | CSAR_peak_ | 21.68,24.33    | - |
| chr1 | 10945997 | 10946037 | CSAR_peak_ | 20.94          | - |
| chr1 | 10946075 | 10946107 | CSAR_peak_ | 13.48          | - |
| chr1 | 10946157 | 10946304 | CSAR_peak_ | 10.83,16.33,-  | - |
| chr1 | 10946383 | 10946421 | CSAR_peak_ | 9.58           | - |
| chr1 | 10946484 | 10946534 | CSAR_peak_ | 15.68          | - |
| chr1 | 10946596 | 10946683 | CSAR_peak_ | 23.65,14.51    | - |
| chr1 | 10946938 | 10947008 | CSAR_peak_ | 23.89,16.6     | - |
| chr1 | 10947112 | 10947174 | CSAR_peak_ | 7.27           | - |
| chr1 | 10947372 | 10947428 | CSAR_peak_ | 8.65,11.07     | - |
| chr1 | 10947534 | 10947571 | CSAR_peak_ | 10.52,8.61     | - |
| chr1 | 10947580 | 10947646 | CSAR_peak_ | 16.11          | - |
| chr1 | 10947712 | 10947848 | CSAR_peak_ | 7.26,12.13,9.- | - |
| chr1 | 10947884 | 10947963 | CSAR_peak_ | 7.27,8.39      | - |
| chr1 | 10948025 | 10948116 | CSAR_peak_ | 7.92,6.87,6.4- | - |
| chr1 | 10948118 | 10948143 | CSAR_peak_ | 7.29           | - |
| chr1 | 10948215 | 10948349 | CSAR_peak_ | 15.9,10.83     | - |
| chr1 | 10948427 | 10948487 | CSAR_peak_ | 13.48,9.27,10- | - |
| chr1 | 10948534 | 10948630 | CSAR_peak_ | 7.27,10.7,9.6- | - |
| chr1 | 10948708 | 10948762 | CSAR_peak_ | 7.58,16.11     | - |
| chr1 | 10948817 | 10948869 | CSAR_peak_ | 14.88          | - |
| chr1 | 10949168 | 10949230 | CSAR_peak_ | 7.27,9.58      | - |
| chr1 | 11040596 | 11040604 | CSAR_peak_ | 7.58           | - |
| chr1 | 11040654 | 11040737 | CSAR_peak_ | 8.39,14.88     | - |
| chr1 | 11041231 | 11041258 | CSAR_peak_ | 16.19,6.1,13.- | - |
| chr1 | 11041371 | 11041414 | CSAR_peak_ | 16.19,5.95,10- | - |
| chr1 | 11041778 | 11041827 | CSAR_peak_ | 7.27           | - |

|      |          |          |             |                |   |
|------|----------|----------|-------------|----------------|---|
| chr1 | 11042865 | 11042943 | CSAR_peak_8 | 6.21           | - |
| chr1 | 11043722 | 11043750 | CSAR_peak_8 | 6.21           | - |
| chr1 | 11077478 | 11077525 | CSAR_peak_7 | 7.27           | - |
| chr1 | 11104546 | 11104592 | CSAR_peak_8 | 6.21           | - |
| chr1 | 11104663 | 11104724 | CSAR_peak_8 | 13.66,8.39     | - |
| chr1 | 11104726 | 11104804 | CSAR_peak_8 | 8.28,14.88     | - |
| chr1 | 11104841 | 11104898 | CSAR_peak_7 | 9.58           | - |
| chr1 | 11105399 | 11105468 | CSAR_peak_7 | 7.27           | - |
| chr1 | 11105782 | 11105822 | CSAR_peak_8 | 6.21           | - |
| chr1 | 11106015 | 11106070 | CSAR_peak_7 | 7.27           | - |
| chr1 | 11106509 | 11106570 | CSAR_peak_7 | 14.76          | - |
| chr1 | 11106656 | 11106734 | CSAR_peak_8 | 10.02,7.27     | - |
| chr1 | 11107162 | 11107204 | CSAR_peak_8 | 6.21           | - |
| chr1 | 11107218 | 11107274 | CSAR_peak_8 | 12.17,8.65     | - |
| chr1 | 11107448 | 11107498 | CSAR_peak_8 | 7.27           | - |
| chr1 | 11107843 | 11107901 | CSAR_peak_8 | 14.88          | - |
| chr1 | 11114950 | 11115032 | CSAR_peak_8 | 9.77,7.27      | - |
| chr1 | 11143872 | 11143922 | CSAR_peak_7 | 7.27           | - |
| chr1 | 11160453 | 11160491 | CSAR_peak_8 | 9.58           | - |
| chr1 | 11160963 | 11161011 | CSAR_peak_7 | 7.27           | - |
| chr1 | 11161159 | 11161201 | CSAR_peak_8 | 7.27           | - |
| chr1 | 11214880 | 11214918 | CSAR_peak_8 | 7.27           | - |
| chr1 | 11214980 | 11215049 | CSAR_peak_8 | 11.38,19.36    | - |
| chr1 | 11215152 | 11215163 | CSAR_peak_7 | 8.39           | - |
| chr1 | 11215201 | 11215235 | CSAR_peak_7 | 6.44           | - |
| chr1 | 11215239 | 11215406 | CSAR_peak_7 | 33.36,58.2,9.  | - |
| chr1 | 11215573 | 11215655 | CSAR_peak_7 | 37.42,50.81    | - |
| chr1 | 11215891 | 11215994 | CSAR_peak_7 | 10.31,6.03     | - |
| chr1 | 11247960 | 11248007 | CSAR_peak_7 | 13.48          | - |
| chr1 | 11248120 | 11248134 | CSAR_peak_7 | 8.39           | - |
| chr1 | 11248222 | 11248250 | CSAR_peak_7 | 8.39           | - |
| chr1 | 11257808 | 11257887 | CSAR_peak_7 | 7,7.34,14.76   | - |
| chr1 | 11288659 | 11288752 | CSAR_peak_7 | 17.82,12.17    | - |
| chr1 | 11288847 | 11289071 | CSAR_peak_7 | 22.52,40.66,;- | - |
| chr1 | 11289072 | 11289099 | CSAR_peak_8 | 9.58           | - |
| chr1 | 11289256 | 11289262 | CSAR_peak_7 | 7.27,13.85     | - |
| chr1 | 11289340 | 11289475 | CSAR_peak_7 | 19.09,11.99,;- | - |
| chr1 | 11289738 | 11289833 | CSAR_peak_8 | 14.88          | - |
| chr1 | 11290055 | 11290144 | CSAR_peak_8 | 10.83          | - |
| chr1 | 11290362 | 11290431 | CSAR_peak_8 | 19.36,6.57     | - |
| chr1 | 11290445 | 11290510 | CSAR_peak_7 | 7.27,6.21      | - |
| chr1 | 11291287 | 11291376 | CSAR_peak_8 | 24.21,12.13    | - |

|      |          |          |            |                |   |
|------|----------|----------|------------|----------------|---|
| chr1 | 11292053 | 11292173 | CSAR_peak_ | 10.83,12.31    | - |
| chr1 | 11292299 | 11292441 | CSAR_peak_ | 25.91,7.27,1   | - |
| chr1 | 11292753 | 11292813 | CSAR_peak_ | 7.27           | - |
| chr1 | 11293008 | 11293109 | CSAR_peak_ | 12.17,17.37    | - |
| chr1 | 11293124 | 11293158 | CSAR_peak_ | 7.92           | - |
| chr1 | 11293237 | 11293325 | CSAR_peak_ | 14.25,9.61     | - |
| chr1 | 11314034 | 11314087 | CSAR_peak_ | 10.02,13.48    | - |
| chr1 | 11314773 | 11314860 | CSAR_peak_ | 8.39,7.27      | - |
| chr1 | 11315188 | 11315275 | CSAR_peak_ | 28.34,29.4     | - |
| chr1 | 11315280 | 11315352 | CSAR_peak_ | 12.31          | - |
| chr1 | 11399900 | 11400080 | CSAR_peak_ | 12.13,5.86,1(- | - |
| chr1 | 11400577 | 11400677 | CSAR_peak_ | 30.02          | - |
| chr1 | 11400761 | 11400792 | CSAR_peak_ | 12.13          | - |
| chr1 | 11401132 | 11401151 | CSAR_peak_ | 6.21           | - |
| chr1 | 11401154 | 11401222 | CSAR_peak_ | 6.21           | - |
| chr1 | 11402850 | 11402926 | CSAR_peak_ | 8.39           | - |
| chr1 | 11405289 | 11405330 | CSAR_peak_ | 9.58           | - |
| chr1 | 11405689 | 11405734 | CSAR_peak_ | 10.83,8.39     | - |
| chr1 | 11407700 | 11407751 | CSAR_peak_ | 9.58           | - |
| chr1 | 11409172 | 11409243 | CSAR_peak_ | 7.27           | - |
| chr1 | 11410162 | 11410225 | CSAR_peak_ | 14.88,14.88    | - |
| chr1 | 11410495 | 11410540 | CSAR_peak_ | 9.58,7.27      | - |
| chr1 | 11410721 | 11410818 | CSAR_peak_ | 20.94,14.76    | - |
| chr1 | 11410854 | 11410966 | CSAR_peak_ | 31.73,25.18    | - |
| chr1 | 11410971 | 11411035 | CSAR_peak_ | 13.48          | - |
| chr1 | 11411169 | 11411202 | CSAR_peak_ | 7.27           | - |
| chr1 | 11411219 | 11411276 | CSAR_peak_ | 6.81           | - |
| chr1 | 11411379 | 11411443 | CSAR_peak_ | 11.81,10.83    | - |
| chr1 | 11411489 | 11411649 | CSAR_peak_ | 33.43,6.65,2(- | - |
| chr1 | 11411724 | 11411824 | CSAR_peak_ | 8.39           | - |
| chr1 | 11412071 | 11412135 | CSAR_peak_ | 8.14,6.21,8.9- | - |
| chr1 | 11423103 | 11423251 | CSAR_peak_ | 106.46,115.0-  | - |
| chr1 | 11423316 | 11423505 | CSAR_peak_ | 126.56,9.62,(- | - |
| chr1 | 11435414 | 11435489 | CSAR_peak_ | 20.1,24.27,4(- | - |
| chr1 | 11435533 | 11435613 | CSAR_peak_ | 38.67,44.14,(- | - |
| chr1 | 11435793 | 11435828 | CSAR_peak_ | 13.14          | - |
| chr1 | 11435906 | 11435983 | CSAR_peak_ | 46.78,30.61    | - |
| chr1 | 11436095 | 11436170 | CSAR_peak_ | 7.7,10.17      | - |
| chr1 | 11436175 | 11436272 | CSAR_peak_ | 29.38,24.92,(- | - |
| chr1 | 11535738 | 11535811 | CSAR_peak_ | 10.95          | - |
| chr1 | 11535947 | 11535997 | CSAR_peak_ | 9.58           | - |
| chr1 | 11540548 | 11540570 | CSAR_peak_ | 8.39           | - |

|      |          |          |            |               |   |
|------|----------|----------|------------|---------------|---|
| chr1 | 11559729 | 11559791 | CSAR_peak_ | 8.92          | - |
| chr1 | 11559883 | 11559959 | CSAR_peak_ | 23.03         | - |
| chr1 | 11560686 | 11560756 | CSAR_peak_ | 11.14         | - |
| chr1 | 11560901 | 11560992 | CSAR_peak_ | 13.48         | - |
| chr1 | 11561078 | 11561141 | CSAR_peak_ | 14.88,6.87,2  | - |
| chr1 | 11561307 | 11561363 | CSAR_peak_ | 6.21          | - |
| chr1 | 11561390 | 11561482 | CSAR_peak_ | 17.82,9.58    | - |
| chr1 | 11561491 | 11561535 | CSAR_peak_ | 16.33         | - |
| chr1 | 11561767 | 11561803 | CSAR_peak_ | 16.33         | - |
| chr1 | 11593605 | 11593677 | CSAR_peak_ | 17.82,9.58    | - |
| chr1 | 11602252 | 11602358 | CSAR_peak_ | 17.82,24.17   | - |
| chr1 | 11602448 | 11602562 | CSAR_peak_ | 7.27,9.77     | - |
| chr1 | 11602679 | 11602830 | CSAR_peak_ | 12.74,22.58   | - |
| chr1 | 11602880 | 11602931 | CSAR_peak_ | 6.21,20.43    | - |
| chr1 | 11603006 | 11603109 | CSAR_peak_ | 6.81,12.13,1  | - |
| chr1 | 11603177 | 11603239 | CSAR_peak_ | 17.82         | - |
| chr1 | 11603580 | 11603638 | CSAR_peak_ | 12.13         | - |
| chr1 | 11604004 | 11604043 | CSAR_peak_ | 11.14         | - |
| chr1 | 11604191 | 11604292 | CSAR_peak_ | 8.14,9.77,16. | - |
| chr1 | 11664466 | 11664521 | CSAR_peak_ | 10.83         | - |
| chr1 | 11665462 | 11665508 | CSAR_peak_ | 12.13         | - |
| chr1 | 11670623 | 11670683 | CSAR_peak_ | 20.43         | - |
| chr1 | 11689958 | 11690003 | CSAR_peak_ | 8.39,5.86     | - |
| chr1 | 11690190 | 11690251 | CSAR_peak_ | 6.95          | - |
| chr1 | 11690430 | 11690461 | CSAR_peak_ | 8.28          | - |
| chr1 | 11690468 | 11690523 | CSAR_peak_ | 7.27          | - |
| chr1 | 11690692 | 11690760 | CSAR_peak_ | 7.27          | - |
| chr1 | 11690772 | 11690896 | CSAR_peak_ | 12.13,10.83   | - |
| chr1 | 11715322 | 11715435 | CSAR_peak_ | 16.55,18.47   | - |
| chr1 | 11715445 | 11715496 | CSAR_peak_ | 7.58          | - |
| chr1 | 11715554 | 11715742 | CSAR_peak_ | 17.37,7.58,1  | - |
| chr1 | 11715842 | 11716062 | CSAR_peak_ | 32.86,33.03   | - |
| chr1 | 11716221 | 11716356 | CSAR_peak_ | 30.53,35.24   | - |
| chr1 | 11716402 | 11716461 | CSAR_peak_ | 6.81,21.22    | - |
| chr1 | 11716525 | 11716570 | CSAR_peak_ | 12.31         | - |
| chr1 | 11716709 | 11716735 | CSAR_peak_ | 6.44          | - |
| chr1 | 11716775 | 11716878 | CSAR_peak_ | 16.54,18.73   | - |
| chr1 | 11716950 | 11717025 | CSAR_peak_ | 6.21          | - |
| chr1 | 11717115 | 11717225 | CSAR_peak_ | 8.09,6.1,6.57 | - |
| chr1 | 11717238 | 11717328 | CSAR_peak_ | 15.68,17.37   | - |
| chr1 | 11717403 | 11717457 | CSAR_peak_ | 19.36,8.39    | - |
| chr1 | 11717551 | 11717597 | CSAR_peak_ | 7.27          | - |

|      |          |          |            |               |   |
|------|----------|----------|------------|---------------|---|
| chr1 | 11717890 | 11717939 | CSAR_peak_ | 8.39          | - |
| chr1 | 11718040 | 11718106 | CSAR_peak_ | 14.88,7.27    | - |
| chr1 | 11718282 | 11718337 | CSAR_peak_ | 12.13         | - |
| chr1 | 11718343 | 11718492 | CSAR_peak_ | 13.48,12.31   | - |
| chr1 | 11718530 | 11718627 | CSAR_peak_ | 29.2,27.61    | - |
| chr1 | 11718819 | 11718894 | CSAR_peak_ | 22.56,12.13   | - |
| chr1 | 11718958 | 11719005 | CSAR_peak_ | 13.66,17.52   | - |
| chr1 | 11719139 | 11719201 | CSAR_peak_ | 29.4,20.94    | - |
| chr1 | 11719293 | 11719377 | CSAR_peak_ | 14.88,6.57    | - |
| chr1 | 11742293 | 11742403 | CSAR_peak_ | 7.27,19.93    | - |
| chr1 | 11742725 | 11742778 | CSAR_peak_ | 8.39          | - |
| chr1 | 11742875 | 11742965 | CSAR_peak_ | 7.92,6.1      | - |
| chr1 | 11744561 | 11744625 | CSAR_peak_ | 7.27,6.21     | - |
| chr1 | 11744972 | 11745008 | CSAR_peak_ | 8.39          | - |
| chr1 | 11745713 | 11745766 | CSAR_peak_ | 7.27,6.21     | - |
| chr1 | 11745976 | 11746033 | CSAR_peak_ | 6.21,7.27     | - |
| chr1 | 11746486 | 11746522 | CSAR_peak_ | 7.27          | - |
| chr1 | 11747166 | 11747203 | CSAR_peak_ | 5.86,7.58     | - |
| chr1 | 11747339 | 11747378 | CSAR_peak_ | 7.92          | - |
| chr1 | 11748205 | 11748293 | CSAR_peak_ | 8.14,12.17    | - |
| chr1 | 11748438 | 11748573 | CSAR_peak_ | 6.81,9.58,9.7 | - |
| chr1 | 11749269 | 11749299 | CSAR_peak_ | 7.58          | - |
| chr1 | 11758534 | 11758550 | CSAR_peak_ | 6.03          | - |
| chr1 | 11760102 | 11760162 | CSAR_peak_ | 10.95         | - |
| chr1 | 11760785 | 11760916 | CSAR_peak_ | 7.27,14.88    | - |
| chr1 | 11760959 | 11761158 | CSAR_peak_ | 12.13         | - |
| chr1 | 11761195 | 11761258 | CSAR_peak_ | 13.48         | - |
| chr1 | 11761284 | 11761387 | CSAR_peak_ | 7.27,7.58     | - |
| chr1 | 11761697 | 11761800 | CSAR_peak_ | 9.58,14.88    | - |
| chr1 | 11761890 | 11761988 | CSAR_peak_ | 8.14          | - |
| chr1 | 11762012 | 11762107 | CSAR_peak_ | 12.13,24.52   | - |
| chr1 | 11762161 | 11762223 | CSAR_peak_ | 9.77          | - |
| chr1 | 11762340 | 11762377 | CSAR_peak_ | 6.21          | - |
| chr1 | 11773884 | 11773942 | CSAR_peak_ | 8.39          | - |
| chr1 | 11799003 | 11799056 | CSAR_peak_ | 6.21          | - |
| chr1 | 11799069 | 11799290 | CSAR_peak_ | 9.77,20.43,9. | - |
| chr1 | 11799296 | 11799339 | CSAR_peak_ | 7.27          | - |
| chr1 | 11799341 | 11799417 | CSAR_peak_ | 10.83,13.48   | - |
| chr1 | 11799511 | 11799672 | CSAR_peak_ | 26.8,14.88    | - |
| chr1 | 11799712 | 11799751 | CSAR_peak_ | 7.58          | - |
| chr1 | 11799775 | 11799860 | CSAR_peak_ | 9.77,9.58     | - |
| chr1 | 11800023 | 11800155 | CSAR_peak_ | 9.61,9.58     | - |



|      |          |          |            |                |
|------|----------|----------|------------|----------------|
| chr1 | 11800197 | 11800413 | CSAR_peak_ | 6.45,9.03,15.- |
| chr1 | 11800448 | 11800525 | CSAR_peak_ | 7.58,7.92 -    |
| chr1 | 11800543 | 11800837 | CSAR_peak_ | 15,24.52,16.-  |
| chr1 | 11800839 | 11800905 | CSAR_peak_ | 10.31,6.57 -   |
| chr1 | 11846407 | 11846495 | CSAR_peak_ | 9.58,7.27 -    |
| chr1 | 11846542 | 11846637 | CSAR_peak_ | 30.53,24.17 -  |
| chr1 | 11846710 | 11846745 | CSAR_peak_ | 6.21 -         |
| chr1 | 11847236 | 11847283 | CSAR_peak_ | 10.83 -        |
| chr1 | 11847321 | 11847384 | CSAR_peak_ | 7.27,7.27 -    |
| chr1 | 11847421 | 11847496 | CSAR_peak_ | 6.21 -         |
| chr1 | 11847947 | 11848036 | CSAR_peak_ | 9.58,9.58 -    |
| chr1 | 11848144 | 11848204 | CSAR_peak_ | 17.82,14.88 -  |
| chr1 | 11848286 | 11848339 | CSAR_peak_ | 12.13 -        |
| chr1 | 11848564 | 11848628 | CSAR_peak_ | 19.36,6.21 -   |
| chr1 | 11848675 | 11848699 | CSAR_peak_ | 6.21 -         |
| chr1 | 11848782 | 11848837 | CSAR_peak_ | 16.05,5.86 -   |
| chr1 | 11849550 | 11849594 | CSAR_peak_ | 7.27 -         |
| chr1 | 11849948 | 11850014 | CSAR_peak_ | 14.88 -        |
| chr1 | 11850267 | 11850345 | CSAR_peak_ | 10.31,6.95 -   |
| chr1 | 11850601 | 11850657 | CSAR_peak_ | 14.88,9.58 -   |
| chr1 | 11851116 | 11851154 | CSAR_peak_ | 12.13 -        |
| chr1 | 11851969 | 11852033 | CSAR_peak_ | 7.58 -         |
| chr1 | 11852299 | 11852340 | CSAR_peak_ | 9.58 -         |
| chr1 | 11853035 | 11853083 | CSAR_peak_ | 7.27 -         |
| chr1 | 11853317 | 11853376 | CSAR_peak_ | 10.02,6.03 -   |
| chr1 | 11854045 | 11854082 | CSAR_peak_ | 5.86,8.39 -    |
| chr1 | 11854523 | 11854580 | CSAR_peak_ | 7 -            |
| chr1 | 11855406 | 11855503 | CSAR_peak_ | 13.48,6.02,6.- |
| chr1 | 11856231 | 11856278 | CSAR_peak_ | 7.27 -         |
| chr1 | 11875197 | 11875232 | CSAR_peak_ | 7.27 -         |
| chr1 | 11875322 | 11875371 | CSAR_peak_ | 7.58 -         |
| chr1 | 11875443 | 11875529 | CSAR_peak_ | 10.57,9.48,1(- |
| chr1 | 11875598 | 11875617 | CSAR_peak_ | 6.85 -         |
| chr1 | 11875741 | 11875770 | CSAR_peak_ | 8.92 -         |
| chr1 | 11875782 | 11875835 | CSAR_peak_ | 10.83 -        |
| chr1 | 11875865 | 11875906 | CSAR_peak_ | 21.94 -        |
| chr1 | 11875961 | 11875978 | CSAR_peak_ | 6.21 -         |
| chr1 | 11876055 | 11876128 | CSAR_peak_ | 9.58,7.27,7.2- |
| chr1 | 11876212 | 11876229 | CSAR_peak_ | 6.21 -         |
| chr1 | 11876232 | 11876257 | CSAR_peak_ | 8.39 -         |
| chr1 | 11876350 | 11876432 | CSAR_peak_ | 9.61,13.85 -   |
| chr1 | 11876748 | 11876808 | CSAR_peak_ | 10.95 -        |

|      |          |          |            |                |   |
|------|----------|----------|------------|----------------|---|
| chr1 | 11967931 | 11968014 | CSAR_peak_ | 14.22,16.38    | - |
| chr1 | 11968040 | 11968082 | CSAR_peak_ | 5.86           | - |
| chr1 | 11968123 | 11968199 | CSAR_peak_ | 16.39,12.18    | - |
| chr1 | 11968216 | 11968266 | CSAR_peak_ | 7.27,19.36     | - |
| chr1 | 11968348 | 11968461 | CSAR_peak_ | 7.29,14.88,9.- | - |
| chr1 | 11968487 | 11968563 | CSAR_peak_ | 12.13,12.13    | - |
| chr1 | 11968589 | 11968755 | CSAR_peak_ | 24.21,12.13,-  | - |
| chr1 | 11968930 | 11969269 | CSAR_peak_ | 33.03,44.69,-  | - |
| chr1 | 11969445 | 11969479 | CSAR_peak_ | 7.27           | - |
| chr1 | 11969634 | 11969795 | CSAR_peak_ | 9.58,8.39      | - |
| chr1 | 11970153 | 11970288 | CSAR_peak_ | 22.56,18.61    | - |
| chr1 | 11970357 | 11970429 | CSAR_peak_ | 12.17,7.92     | - |
| chr1 | 11970861 | 11970915 | CSAR_peak_ | 7.92           | - |
| chr1 | 11971045 | 11971100 | CSAR_peak_ | 7.27           | - |
| chr1 | 11971820 | 11971912 | CSAR_peak_ | 13.48          | - |
| chr1 | 11972467 | 11972569 | CSAR_peak_ | 8.12,21.94     | - |
| chr1 | 11976061 | 11976116 | CSAR_peak_ | 5.86,6.81      | - |
| chr1 | 11976406 | 11976456 | CSAR_peak_ | 7.58           | - |
| chr1 | 11978286 | 11978329 | CSAR_peak_ | 7.27           | - |
| chr1 | 12053540 | 12053583 | CSAR_peak_ | 6.21           | - |
| chr1 | 12057734 | 12057765 | CSAR_peak_ | 6.21           | - |
| chr1 | 12069495 | 12069568 | CSAR_peak_ | 8.65           | - |
| chr1 | 12097220 | 12097276 | CSAR_peak_ | 12.31,6.22     | - |
| chr1 | 12198666 | 12198722 | CSAR_peak_ | 9.58           | - |
| chr1 | 12209348 | 12209392 | CSAR_peak_ | 7.58           | - |
| chr1 | 12209581 | 12209624 | CSAR_peak_ | 8.65           | - |
| chr1 | 12222744 | 12222797 | CSAR_peak_ | 8.39,6.21      | - |
| chr1 | 12222896 | 12223000 | CSAR_peak_ | 9.58,8.65      | - |
| chr1 | 12223393 | 12223445 | CSAR_peak_ | 7.27           | - |
| chr1 | 12245008 | 12245077 | CSAR_peak_ | 8.39           | - |
| chr1 | 12245399 | 12245459 | CSAR_peak_ | 12.13          | - |
| chr1 | 12245520 | 12245575 | CSAR_peak_ | 10.95,5.86     | - |
| chr1 | 12349628 | 12349647 | CSAR_peak_ | 6.44           | - |
| chr1 | 12349649 | 12349831 | CSAR_peak_ | 9.55,10.31,7.- | - |
| chr1 | 12350114 | 12350156 | CSAR_peak_ | 8.39           | - |
| chr1 | 12350248 | 12350305 | CSAR_peak_ | 8.39,16.33     | - |
| chr1 | 12350357 | 12350426 | CSAR_peak_ | 6.87,8.39,5.6- | - |
| chr1 | 12350436 | 12350476 | CSAR_peak_ | 6.03,9.58      | - |
| chr1 | 12350731 | 12350877 | CSAR_peak_ | 12.17,14.85    | - |
| chr1 | 12350914 | 12351066 | CSAR_peak_ | 5.86,6.02      | - |
| chr1 | 12358261 | 12358339 | CSAR_peak_ | 6.21,6.81,5.8- | - |
| chr1 | 12358499 | 12358548 | CSAR_peak_ | 9.58           | - |

|      |          |          |             |                |   |
|------|----------|----------|-------------|----------------|---|
| chr1 | 12370552 | 12370593 | CSAR_peak_! | 9.58           | - |
| chr1 | 12371037 | 12371093 | CSAR_peak_! | 8.39           | - |
| chr1 | 12465654 | 12465727 | CSAR_peak_! | 7.58           | - |
| chr1 | 12515375 | 12515443 | CSAR_peak_! | 13.29          | - |
| chr1 | 12515511 | 12515562 | CSAR_peak_! | 6.21           | - |
| chr1 | 12588030 | 12588080 | CSAR_peak_! | 7.27           | - |
| chr1 | 12588309 | 12588336 | CSAR_peak_! | 6.21           | - |
| chr1 | 12588452 | 12588513 | CSAR_peak_! | 13.66,14.88    | - |
| chr1 | 12588625 | 12588696 | CSAR_peak_! | 10.83          | - |
| chr1 | 12589502 | 12589552 | CSAR_peak_! | 5.86           | - |
| chr1 | 12646842 | 12646905 | CSAR_peak_! | 6.21           | - |
| chr1 | 12648925 | 12648995 | CSAR_peak_! | 12.13          | - |
| chr1 | 12649692 | 12649741 | CSAR_peak_! | 7.27           | - |
| chr1 | 12650012 | 12650065 | CSAR_peak_! | 12.17          | - |
| chr1 | 12650081 | 12650289 | CSAR_peak_! | 20.94,9.27     | - |
| chr1 | 12650295 | 12650396 | CSAR_peak_! | 7.58,8.39,5.8  | - |
| chr1 | 12650426 | 12650466 | CSAR_peak_! | 7.27           | - |
| chr1 | 12650693 | 12650873 | CSAR_peak_! | 12.13,9.58     | - |
| chr1 | 12736496 | 12736533 | CSAR_peak_! | 9.58           | - |
| chr1 | 12737366 | 12737409 | CSAR_peak_! | 9.58           | - |
| chr1 | 12744521 | 12744560 | CSAR_peak_! | 8.39           | - |
| chr1 | 12744911 | 12744978 | CSAR_peak_! | 10.31,6.44     | - |
| chr1 | 12745549 | 12745615 | CSAR_peak_! | 12.74          | - |
| chr1 | 12749008 | 12749048 | CSAR_peak_! | 6.21           | - |
| chr1 | 12749477 | 12749510 | CSAR_peak_! | 7.27           | - |
| chr1 | 12749810 | 12749851 | CSAR_peak_! | 7.27           | - |
| chr1 | 12933444 | 12933554 | CSAR_peak_! | 19.36,19.36    | - |
| chr1 | 12937145 | 12937196 | CSAR_peak_! | 6.21           | - |
| chr1 | 12959331 | 12959384 | CSAR_peak_! | 7.58           | - |
| chr1 | 12960465 | 12960535 | CSAR_peak_! | 20.13,6.95     | - |
| chr1 | 12961140 | 12961206 | CSAR_peak_! | 7.27           | - |
| chr1 | 12980741 | 12980804 | CSAR_peak_! | 17.82          | - |
| chr1 | 12980927 | 12980980 | CSAR_peak_! | 12.17          | - |
| chr1 | 12981065 | 12981136 | CSAR_peak_! | 9.61,8.95      | - |
| chr1 | 12981235 | 12981385 | CSAR_peak_! | 18.85          | - |
| chr1 | 12981439 | 12981489 | CSAR_peak_! | 14.88,14.76    | - |
| chr1 | 12981721 | 12981867 | CSAR_peak_! | 15.56,19.98,,- | - |
| chr1 | 12981894 | 12981987 | CSAR_peak_! | 14.88          | - |
| chr1 | 12981992 | 12982093 | CSAR_peak_! | 10.31,7.27     | - |
| chr1 | 12982289 | 12982360 | CSAR_peak_! | 8.14           | - |
| chr1 | 12982516 | 12982734 | CSAR_peak_! | 13.48,19.98,,- | - |
| chr1 | 12982872 | 12982988 | CSAR_peak_! | 16.19,13.51    | - |

|      |          |          |             |                |   |
|------|----------|----------|-------------|----------------|---|
| chr1 | 12983192 | 12983250 | CSAR_peak_! | 6.21           | - |
| chr1 | 12983407 | 12983479 | CSAR_peak_! | 10.95,7.58     | - |
| chr1 | 12983561 | 12983590 | CSAR_peak_! | 6.21           | - |
| chr1 | 12983711 | 12983776 | CSAR_peak_! | 7.58           | - |
| chr1 | 12983900 | 12983982 | CSAR_peak_! | 14.63,6.51     | - |
| chr1 | 12984009 | 12984126 | CSAR_peak_! | 8.28,23.95     | - |
| chr1 | 12984204 | 12984250 | CSAR_peak_! | 12.17          | - |
| chr1 | 13122337 | 13122419 | CSAR_peak_! | 7.27,14.88     | - |
| chr1 | 13122450 | 13122734 | CSAR_peak_! | 16.54,26.97,;- | - |
| chr1 | 13122781 | 13122842 | CSAR_peak_! | 8.2            | - |
| chr1 | 13122964 | 13123015 | CSAR_peak_! | 7.27           | - |
| chr1 | 13123059 | 13123099 | CSAR_peak_! | 6.95           | - |
| chr1 | 13123209 | 13123292 | CSAR_peak_! | 25.91,48.73    | - |
| chr1 | 13123417 | 13123589 | CSAR_peak_! | 40.66,31.73    | - |
| chr1 | 13123657 | 13123800 | CSAR_peak_! | 13.51,27.64    | - |
| chr1 | 13123832 | 13123848 | CSAR_peak_! | 6.21,6.02      | - |
| chr1 | 13123897 | 13124052 | CSAR_peak_! | 10.52,17.4     | - |
| chr1 | 13124129 | 13124204 | CSAR_peak_! | 18.85          | - |
| chr1 | 13124260 | 13124333 | CSAR_peak_! | 20.43,8.65     | - |
| chr1 | 13124363 | 13124537 | CSAR_peak_! | 19.45,7.27,2;- | - |
| chr1 | 13124575 | 13124682 | CSAR_peak_! | 23.03,27.17    | - |
| chr1 | 13124689 | 13124841 | CSAR_peak_! | 18.72,24.97    | - |
| chr1 | 13125118 | 13125162 | CSAR_peak_! | 14.88,12.13    | - |
| chr1 | 13278099 | 13278146 | CSAR_peak_! | 7.27,7.27      | - |
| chr1 | 13279498 | 13279576 | CSAR_peak_! | 8.39,7.27      | - |
| chr1 | 13467257 | 13467312 | CSAR_peak_! | 9.58           | - |
| chr1 | 13468378 | 13468447 | CSAR_peak_! | 6.21           | - |
| chr1 | 13469102 | 13469159 | CSAR_peak_! | 12.13,12.17    | - |
| chr1 | 13470218 | 13470289 | CSAR_peak_! | 9.48,6.94      | - |
| chr1 | 13470316 | 13470392 | CSAR_peak_! | 7.27,7.58,6.2- | - |
| chr1 | 13696402 | 13696473 | CSAR_peak_! | 9.77,18.73     | - |
| chr1 | 13698369 | 13698418 | CSAR_peak_! | 6.21           | - |
| chr1 | 13898615 | 13898674 | CSAR_peak_! | 7.92           | - |
| chr1 | 13898758 | 13898853 | CSAR_peak_! | 24.21,19.98    | - |
| chr1 | 13899285 | 13899385 | CSAR_peak_! | 9.58,20.13     | - |
| chr1 | 13899473 | 13899513 | CSAR_peak_! | 9.77           | - |
| chr1 | 13899518 | 13899637 | CSAR_peak_! | 13.48,12.31    | - |
| chr1 | 13899830 | 13899979 | CSAR_peak_! | 25.91          | - |
| chr1 | 13900002 | 13900044 | CSAR_peak_! | 6.21           | - |
| chr1 | 13900255 | 13900315 | CSAR_peak_! | 6.03           | - |
| chr1 | 14028608 | 14028665 | CSAR_peak_! | 9.58           | - |
| chr1 | 14029094 | 14029161 | CSAR_peak_! | 24.21          | - |

|      |          |          |             |               |   |
|------|----------|----------|-------------|---------------|---|
| chr1 | 14029862 | 14029938 | CSAR_peak_  | 7.27          | - |
| chr1 | 14030001 | 14030055 | CSAR_peak_  | 9.77          | - |
| chr1 | 14030134 | 14030185 | CSAR_peak_! | 7.27          | - |
| chr1 | 15651886 | 15651912 | CSAR_peak_! | 6.21          | - |
| chr1 | 15895732 | 15895785 | CSAR_peak_! | 7.27          | - |
| chr1 | 15897394 | 15897495 | CSAR_peak_! | 14.85,7.58    | - |
| chr1 | 15899741 | 15899774 | CSAR_peak_! | 7.27          | - |
| chr1 | 16133762 | 16133832 | CSAR_peak_! | 6.21          | - |
| chr1 | 16134991 | 16135072 | CSAR_peak_! | 17.82,27.64   | - |
| chr1 | 16135239 | 16135355 | CSAR_peak_! | 16.22,33.03   | - |
| chr1 | 16135657 | 16135714 | CSAR_peak_! | 16.33         | - |
| chr1 | 16135902 | 16135949 | CSAR_peak_! | 7.58          | - |
| chr1 | 16136370 | 16136440 | CSAR_peak_! | 12.13         | - |
| chr1 | 16136851 | 16136924 | CSAR_peak_! | 17.82,12.13   | - |
| chr1 | 16137011 | 16137158 | CSAR_peak_! | 19.96,8.44,1: | - |
| chr1 | 16137180 | 16137227 | CSAR_peak_! | 7.27          | - |
| chr1 | 16137251 | 16137323 | CSAR_peak_! | 6.45,8.39     | - |
| chr1 | 16137410 | 16137468 | CSAR_peak_! | 9.27          | - |
| chr1 | 16191426 | 16191480 | CSAR_peak_! | 8.39          | - |
| chr1 | 16276930 | 16276966 | CSAR_peak_! | 9.58          | - |
| chr1 | 16277642 | 16277685 | CSAR_peak_! | 6.57          | - |
| chr1 | 16278129 | 16278170 | CSAR_peak_! | 10.95         | - |
| chr1 | 16428798 | 16428845 | CSAR_peak_! | 6.21          | - |
| chr1 | 16429388 | 16429438 | CSAR_peak_! | 6.21          | - |
| chr1 | 16622387 | 16622429 | CSAR_peak_! | 12.17         | - |
| chr1 | 16622680 | 16622724 | CSAR_peak_! | 12.13         | - |
| chr1 | 16623553 | 16623606 | CSAR_peak_! | 10.83         | - |
| chr1 | 16624005 | 16624054 | CSAR_peak_! | 6.21          | - |
| chr1 | 16624252 | 16624294 | CSAR_peak_! | 6.21          | - |
| chr1 | 16624354 | 16624405 | CSAR_peak_! | 12.13         | - |
| chr1 | 16637693 | 16637743 | CSAR_peak_! | 7.27          | - |
| chr1 | 16639261 | 16639346 | CSAR_peak_! | 20.43,7.27    | - |
| chr1 | 16639632 | 16639702 | CSAR_peak_! | 12.13         | - |
| chr1 | 16641854 | 16641904 | CSAR_peak_! | 8.39          | - |
| chr1 | 16766384 | 16766456 | CSAR_peak_! | 23.54,21.31   | - |
| chr1 | 16786243 | 16786311 | CSAR_peak_! | 6.21          | - |
| chr1 | 16796988 | 16797031 | CSAR_peak_! | 8.39          | - |
| chr1 | 16797132 | 16797203 | CSAR_peak_! | 8.65,9.58     | - |
| chr1 | 16797274 | 16797333 | CSAR_peak_! | 17.82,7.27    | - |
| chr1 | 16797399 | 16797453 | CSAR_peak_! | 19.36         | - |
| chr1 | 16797495 | 16797563 | CSAR_peak_! | 9.58,7.27     | - |
| chr1 | 16797715 | 16797782 | CSAR_peak_! | 16.08,6.81    | - |

|      |          |          |             |                  |   |
|------|----------|----------|-------------|------------------|---|
| chr1 | 16797818 | 16797840 | CSAR_peak_  | 6.44             | - |
| chr1 | 16797905 | 16797950 | CSAR_peak_  | 9.58             | - |
| chr1 | 16798197 | 16798271 | CSAR_peak_! | 7.58             | - |
| chr1 | 16798363 | 16798440 | CSAR_peak_! | 12.17,22.74      | - |
| chr1 | 16799971 | 16800026 | CSAR_peak_! | 8.14             | - |
| chr1 | 16834784 | 16834893 | CSAR_peak_! | 18.1,11.28       | - |
| chr1 | 16834942 | 16835139 | CSAR_peak_! | 25.1,34.31,11.1  | - |
| chr1 | 16835488 | 16835556 | CSAR_peak_! | 33.47,12.13      | - |
| chr1 | 16835641 | 16835732 | CSAR_peak_! | 46.89,20.43      | - |
| chr1 | 16835871 | 16835905 | CSAR_peak_! | 6.57             | - |
| chr1 | 16835910 | 16836030 | CSAR_peak_! | 54.19,25.34      | - |
| chr1 | 16836075 | 16836119 | CSAR_peak_! | 14.88,20.43      | - |
| chr1 | 16836185 | 16836231 | CSAR_peak_! | 7.58             | - |
| chr1 | 16836286 | 16836392 | CSAR_peak_! | 14.88,14.88      | - |
| chr1 | 16836396 | 16836487 | CSAR_peak_! | 19.36,12.17      | - |
| chr1 | 16836517 | 16836617 | CSAR_peak_! | 26.69            | - |
| chr1 | 16836648 | 16836698 | CSAR_peak_! | 24.21            | - |
| chr1 | 16836933 | 16836987 | CSAR_peak_! | 17.82,25.91      | - |
| chr1 | 16837009 | 16837167 | CSAR_peak_! | 10.94,14.85,11.1 | - |
| chr1 | 16837178 | 16837205 | CSAR_peak_! | 9.58             | - |
| chr1 | 16837227 | 16837272 | CSAR_peak_! | 7.58             | - |
| chr1 | 16837719 | 16838018 | CSAR_peak_! | 31.2,8.52,18.1   | - |
| chr1 | 16848676 | 16848829 | CSAR_peak_! | 8.95,18.73,11.1  | - |
| chr1 | 16848896 | 16848949 | CSAR_peak_! | 14.88            | - |
| chr1 | 16849177 | 16849244 | CSAR_peak_! | 6.21             | - |
| chr1 | 16849330 | 16849368 | CSAR_peak_! | 7.58             | - |
| chr1 | 16849532 | 16849581 | CSAR_peak_! | 6.95             | - |
| chr1 | 16849601 | 16849669 | CSAR_peak_! | 11.96            | - |
| chr1 | 16849744 | 16849892 | CSAR_peak_! | 12.31,19.36,11.1 | - |
| chr1 | 16849974 | 16850209 | CSAR_peak_! | 19.36,17.82,11.1 | - |
| chr1 | 16850328 | 16850459 | CSAR_peak_! | 18.95,12.35      | - |
| chr1 | 16850857 | 16850868 | CSAR_peak_! | 6.03             | - |
| chr1 | 16907995 | 16908109 | CSAR_peak_! | 10.82,5.62,6.1   | - |
| chr1 | 16908670 | 16908775 | CSAR_peak_! | 10.31,13.66      | - |
| chr1 | 16908818 | 16908915 | CSAR_peak_! | 10.83,12.59,11.1 | - |
| chr1 | 16909198 | 16909256 | CSAR_peak_! | 12.13            | - |
| chr1 | 16909328 | 16909421 | CSAR_peak_! | 16.11,25.91      | - |
| chr1 | 16912657 | 16912690 | CSAR_peak_! | 9.58             | - |
| chr1 | 16912770 | 16912827 | CSAR_peak_! | 7.27             | - |
| chr1 | 16913313 | 16913441 | CSAR_peak_! | 9.58,8.14        | - |
| chr1 | 16914495 | 16914535 | CSAR_peak_! | 8.65             | - |
| chr1 | 16914871 | 16914995 | CSAR_peak_! | 17.4,9.03,7.2    | - |

|      |          |          |             |                |   |
|------|----------|----------|-------------|----------------|---|
| chr1 | 16915251 | 16915268 | CSAR_peak_! | 6.21           | - |
| chr1 | 16915299 | 16915345 | CSAR_peak_! | 9.58           | - |
| chr1 | 16915643 | 16915713 | CSAR_peak_! | 12.13          | - |
| chr1 | 16915892 | 16915968 | CSAR_peak_! | 8.39,6.21      | - |
| chr1 | 17075521 | 17075568 | CSAR_peak_! | 6.21           | - |
| chr1 | 17075701 | 17075758 | CSAR_peak_! | 14.88          | - |
| chr1 | 17075858 | 17075897 | CSAR_peak_! | 7.27           | - |
| chr1 | 17076170 | 17076258 | CSAR_peak_! | 10.83,20.94    | - |
| chr1 | 17078616 | 17078704 | CSAR_peak_! | 7.27,7.27      | - |
| chr1 | 17080430 | 17080488 | CSAR_peak_! | 13.48,6.95     | - |
| chr1 | 17084196 | 17084255 | CSAR_peak_! | 7.27           | - |
| chr1 | 17084554 | 17084618 | CSAR_peak_! | 42.64,14.76    | - |
| chr1 | 17085606 | 17085668 | CSAR_peak_! | 9.77,6.1       | - |
| chr1 | 17085726 | 17085817 | CSAR_peak_! | 27.64,7.58     | - |
| chr1 | 17086188 | 17086278 | CSAR_peak_! | 9.58,14.88     | - |
| chr1 | 17086355 | 17086455 | CSAR_peak_! | 20.05,14.88    | - |
| chr1 | 17086579 | 17086658 | CSAR_peak_! | 17.82,9.03     | - |
| chr1 | 17087339 | 17087395 | CSAR_peak_! | 12.13,10.83    | - |
| chr1 | 17087986 | 17088034 | CSAR_peak_! | 17.37,8.28     | - |
| chr1 | 17088167 | 17088293 | CSAR_peak_! | 7.27,14.88,7.- | - |
| chr1 | 17088670 | 17088743 | CSAR_peak_! | 6.21,7.27      | - |
| chr1 | 17089051 | 17089201 | CSAR_peak_! | 7.92,7.27      | - |
| chr1 | 17089542 | 17089665 | CSAR_peak_! | 9.77,9.27,8.1- | - |
| chr1 | 17089690 | 17089714 | CSAR_peak_! | 7.27           | - |
| chr1 | 17091120 | 17091214 | CSAR_peak_! | 7.27,6.21      | - |
| chr1 | 17162767 | 17162810 | CSAR_peak_! | 12.13          | - |
| chr1 | 17163346 | 17163403 | CSAR_peak_! | 8.14           | - |
| chr1 | 17163672 | 17163684 | CSAR_peak_! | 6.21           | - |
| chr1 | 17164197 | 17164251 | CSAR_peak_! | 14.88,9.58     | - |
| chr1 | 17165407 | 17165475 | CSAR_peak_! | 9.77           | - |
| chr1 | 17165601 | 17165631 | CSAR_peak_! | 9.48,5.86      | - |
| chr1 | 17165711 | 17165795 | CSAR_peak_! | 15.21,6.02,1.- | - |
| chr1 | 17166342 | 17166440 | CSAR_peak_! | 16.77,10.83    | - |
| chr1 | 17167226 | 17167268 | CSAR_peak_! | 10.95          | - |
| chr1 | 17170003 | 17170051 | CSAR_peak_! | 8.39           | - |
| chr1 | 17170344 | 17170389 | CSAR_peak_! | 9.58           | - |
| chr1 | 17173633 | 17173688 | CSAR_peak_! | 7.27           | - |
| chr1 | 17175544 | 17175599 | CSAR_peak_! | 7.27           | - |
| chr1 | 17283210 | 17283226 | CSAR_peak_! | 6.21           | - |
| chr1 | 17283322 | 17283382 | CSAR_peak_! | 22.56,13.48    | - |
| chr1 | 17283566 | 17283639 | CSAR_peak_! | 10.31,8.92     | - |
| chr1 | 17283657 | 17283772 | CSAR_peak_! | 15.99,21.22,-  | - |

|      |          |          |             |                |   |
|------|----------|----------|-------------|----------------|---|
| chr1 | 17284119 | 17284165 | CSAR_peak_! | 12.13,10.83    | - |
| chr1 | 17284216 | 17284260 | CSAR_peak_! | 13.44,12.13    | - |
| chr1 | 17284358 | 17284480 | CSAR_peak_! | 22.58,14.92    | - |
| chr1 | 17284503 | 17284655 | CSAR_peak_! | 16.23,14.88,(- |   |
| chr1 | 17285123 | 17285173 | CSAR_peak_! | 5.95           | - |
| chr1 | 17285190 | 17285235 | CSAR_peak_! | 6.71           | - |
| chr1 | 17285417 | 17285490 | CSAR_peak_! | 6.1,9.77       | - |
| chr1 | 17321524 | 17321566 | CSAR_peak_! | 12.13          | - |
| chr1 | 17323045 | 17323085 | CSAR_peak_! | 6.21           | - |
| chr1 | 17323282 | 17323374 | CSAR_peak_! | 7.27           | - |
| chr1 | 17373002 | 17373030 | CSAR_peak_! | 7.27           | - |
| chr1 | 17373148 | 17373185 | CSAR_peak_! | 8.39           | - |
| chr1 | 17373506 | 17373547 | CSAR_peak_! | 7.27           | - |
| chr1 | 17395748 | 17395810 | CSAR_peak_! | 6.95           | - |
| chr1 | 17396144 | 17396187 | CSAR_peak_! | 8.2            | - |
| chr1 | 17396648 | 17396706 | CSAR_peak_! | 8.39           | - |
| chr1 | 17437827 | 17437860 | CSAR_peak_! | 6.21           | - |
| chr1 | 17483902 | 17483963 | CSAR_peak_! | 16.4,15.28     | - |
| chr1 | 17518751 | 17518814 | CSAR_peak_! | 13.48          | - |
| chr1 | 17613343 | 17613388 | CSAR_peak_! | 9.58,8.65      | - |
| chr1 | 17733033 | 17733120 | CSAR_peak_! | 7.27           | - |
| chr1 | 17733895 | 17733972 | CSAR_peak_! | 15,10.83       | - |
| chr1 | 17734189 | 17734208 | CSAR_peak_! | 6.21           | - |
| chr1 | 17734312 | 17734352 | CSAR_peak_! | 6.21           | - |
| chr1 | 17735052 | 17735161 | CSAR_peak_! | 7.27,6.21      | - |
| chr1 | 17735527 | 17735575 | CSAR_peak_! | 13.51          | - |
| chr1 | 17735757 | 17735804 | CSAR_peak_! | 9.58,7.27      | - |
| chr1 | 17736419 | 17736507 | CSAR_peak_! | 13.48,6.95     | - |
| chr1 | 17736562 | 17736602 | CSAR_peak_! | 12.74          | - |
| chr1 | 17736657 | 17736714 | CSAR_peak_! | 14.88,5.86     | - |
| chr1 | 17737190 | 17737241 | CSAR_peak_! | 10.83          | - |
| chr1 | 17737480 | 17737550 | CSAR_peak_! | 7.58,9.77      | - |
| chr1 | 17738211 | 17738256 | CSAR_peak_! | 6.21           | - |
| chr1 | 17738351 | 17738404 | CSAR_peak_! | 15.2,19.36     | - |
| chr1 | 17738454 | 17738513 | CSAR_peak_! | 10.31          | - |
| chr1 | 17739158 | 17739227 | CSAR_peak_! | 9.58,7.27      | - |
| chr1 | 17739474 | 17739529 | CSAR_peak_! | 8.39           | - |
| chr1 | 17739599 | 17739677 | CSAR_peak_! | 8.39           | - |
| chr1 | 17740359 | 17740423 | CSAR_peak_! | 14.34,12.13    | - |
| chr1 | 17740531 | 17740585 | CSAR_peak_! | 7.58           | - |
| chr1 | 17740704 | 17740755 | CSAR_peak_! | 10.95,6.21     | - |
| chr1 | 17740979 | 17741040 | CSAR_peak_! | 12.17,8.39     | - |



|      |          |          |             |             |   |
|------|----------|----------|-------------|-------------|---|
| chr1 | 17741556 | 17741610 | CSAR_peak_! | 12.13       | - |
| chr1 | 17742146 | 17742210 | CSAR_peak_! | 6.21,12.13  | - |
| chr1 | 17743088 | 17743126 | CSAR_peak_! | 7.27,6.95   | - |
| chr1 | 17743346 | 17743391 | CSAR_peak_! | 9.58,16.33  | - |
| chr1 | 17744365 | 17744406 | CSAR_peak_! | 7.58        | - |
| chr1 | 17744518 | 17744569 | CSAR_peak_! | 9.58        | - |
| chr1 | 17744905 | 17744968 | CSAR_peak_! | 9.58        | - |
| chr1 | 17746214 | 17746326 | CSAR_peak_! | 7.27,10.83  | - |
| chr1 | 17746460 | 17746525 | CSAR_peak_! | 7.27        | - |
| chr1 | 17746870 | 17746921 | CSAR_peak_! | 14.88       | - |
| chr1 | 17747175 | 17747273 | CSAR_peak_! | 9.58        | - |
| chr1 | 17747400 | 17747499 | CSAR_peak_! | 14.76,7.7   | - |
| chr1 | 17747523 | 17747532 | CSAR_peak_! | 12.13       | - |
| chr1 | 17747752 | 17747836 | CSAR_peak_! | 12.13,23.49 | - |
| chr1 | 17747837 | 17747860 | CSAR_peak_! | 6.85        | - |
| chr1 | 17747864 | 17747978 | CSAR_peak_! | 14.85,23.95 | - |
| chr1 | 17748166 | 17748238 | CSAR_peak_! | 9.58        | - |
| chr1 | 17748291 | 17748411 | CSAR_peak_! | 15.47,37.91 | - |
| chr1 | 17748458 | 17748595 | CSAR_peak_! | 15.2,10.95  | - |
| chr1 | 17749180 | 17749227 | CSAR_peak_! | 9.77,33.03  | - |
| chr1 | 17749390 | 17749456 | CSAR_peak_! | 9.03,25.62  | - |
| chr1 | 17749487 | 17749528 | CSAR_peak_! | 6.57        | - |
| chr1 | 17750027 | 17750069 | CSAR_peak_! | 8.13,14.88  | - |
| chr1 | 17750257 | 17750306 | CSAR_peak_! | 7.27        | - |
| chr1 | 17750345 | 17750367 | CSAR_peak_! | 12.13       | - |
| chr1 | 17750456 | 17750495 | CSAR_peak_! | 7.27,6.21   | - |
| chr1 | 17750771 | 17750823 | CSAR_peak_! | 9.77        | - |
| chr1 | 17750974 | 17750993 | CSAR_peak_! | 6.45        | - |
| chr1 | 17751068 | 17751128 | CSAR_peak_! | 8.39,8.65   | - |
| chr1 | 17751414 | 17751473 | CSAR_peak_! | 25.91       | - |
| chr1 | 17751703 | 17751767 | CSAR_peak_! | 17.82,10.83 | - |
| chr1 | 17752464 | 17752578 | CSAR_peak_! | 17.82,13.29 | - |
| chr1 | 17752700 | 17752757 | CSAR_peak_! | 12.13,12.17 | - |
| chr1 | 17752782 | 17752935 | CSAR_peak_! | 24.21,8.09  | - |
| chr1 | 17753000 | 17753080 | CSAR_peak_! | 7.26,22.56  | - |
| chr1 | 17753224 | 17753287 | CSAR_peak_! | 8.12        | - |
| chr1 | 17753896 | 17753990 | CSAR_peak_! | 8.65,17.37  | - |
| chr1 | 17754789 | 17754817 | CSAR_peak_! | 7.56        | - |
| chr1 | 17754932 | 17754984 | CSAR_peak_! | 8.07,10.61  | - |
| chr1 | 17755667 | 17755729 | CSAR_peak_! | 10.94,9.32  | - |
| chr1 | 17756272 | 17756313 | CSAR_peak_! | 12.27,8.39  | - |
| chr1 | 17756446 | 17756474 | CSAR_peak_! | 17.4        | - |

|      |          |          |             |               |   |
|------|----------|----------|-------------|---------------|---|
| chr1 | 17757659 | 17757736 | CSAR_peak_! | 13.92,33.47   | - |
| chr1 | 17770889 | 17770912 | CSAR_peak_! | 9.58          | - |
| chr1 | 17770987 | 17771042 | CSAR_peak_! | 40.66,19.36   | - |
| chr1 | 17772017 | 17772073 | CSAR_peak_! | 6.21          | - |
| chr1 | 17772719 | 17772772 | CSAR_peak_! | 12.13         | - |
| chr1 | 17809895 | 17809972 | CSAR_peak_! | 7.34          | - |
| chr1 | 17811286 | 17811374 | CSAR_peak_! | 9.58,7.27     | - |
| chr1 | 17885141 | 17885211 | CSAR_peak_! | 7.27          | - |
| chr1 | 17886030 | 17886078 | CSAR_peak_! | 12.13         | - |
| chr1 | 17886405 | 17886462 | CSAR_peak_! | 12.17,9.31    | - |
| chr1 | 17886734 | 17886801 | CSAR_peak_! | 14.88,14.88   | - |
| chr1 | 17886907 | 17886981 | CSAR_peak_! | 14.08,10.62   | - |
| chr1 | 17887062 | 17887149 | CSAR_peak_! | 22.58,15      | - |
| chr1 | 17887296 | 17887360 | CSAR_peak_! | 8.39,10.83,7  | - |
| chr1 | 17887445 | 17887508 | CSAR_peak_! | 12.13,18.4,14 | - |
| chr1 | 17887607 | 17887692 | CSAR_peak_! | 9.77,12.13    | - |
| chr1 | 17887938 | 17888083 | CSAR_peak_! | 22.56,12.17   | - |
| chr1 | 17888285 | 17888378 | CSAR_peak_! | 14.88,13.48   | - |
| chr1 | 17888466 | 17888505 | CSAR_peak_! | 8.65,8.39     | - |
| chr1 | 17888539 | 17888589 | CSAR_peak_! | 11.75,28.96   | - |
| chr1 | 17888939 | 17888990 | CSAR_peak_! | 9.43,20.18    | - |
| chr1 | 17889198 | 17889217 | CSAR_peak_! | 7.27          | - |
| chr1 | 17889685 | 17889802 | CSAR_peak_! | 9.58,18.73,11 | - |
| chr1 | 17889873 | 17889930 | CSAR_peak_! | 9.77,6.21     | - |
| chr1 | 17889939 | 17890012 | CSAR_peak_! | 7.27,16.33    | - |
| chr1 | 17890091 | 17890209 | CSAR_peak_! | 22.74,10.17,1 | - |
| chr1 | 17890302 | 17890370 | CSAR_peak_! | 10.31,7.27    | - |
| chr1 | 17890737 | 17890773 | CSAR_peak_! | 6.21          | - |
| chr1 | 17890774 | 17890895 | CSAR_peak_! | 16.34,9.58    | - |
| chr1 | 17890961 | 17891014 | CSAR_peak_! | 13.51,7.27    | - |
| chr1 | 17891085 | 17891135 | CSAR_peak_! | 7.27          | - |
| chr1 | 17891265 | 17891346 | CSAR_peak_! | 7.58,7.27     | - |
| chr1 | 17891844 | 17891901 | CSAR_peak_! | 10.52,7.34    | - |
| chr1 | 17892428 | 17892480 | CSAR_peak_! | 9.58          | - |
| chr1 | 17902969 | 17903013 | CSAR_peak_! | 7             | - |
| chr1 | 17903290 | 17903399 | CSAR_peak_! | 8.39,5.86,9.5 | - |
| chr1 | 17903483 | 17903534 | CSAR_peak_! | 8.39          | - |
| chr1 | 17903957 | 17903996 | CSAR_peak_! | 7.27          | - |
| chr1 | 17904001 | 17904052 | CSAR_peak_! | 9.32          | - |
| chr1 | 17904584 | 17904688 | CSAR_peak_! | 5.86,9.77,6.0 | - |
| chr1 | 17905706 | 17905720 | CSAR_peak_! | 8.39          | - |
| chr1 | 17905791 | 17905855 | CSAR_peak_! | 9.31          | - |

|      |          |          |             |               |   |
|------|----------|----------|-------------|---------------|---|
| chr1 | 17905973 | 17906029 | CSAR_peak_! | 14.85,5.86    | - |
| chr1 | 17906108 | 17906157 | CSAR_peak_! | 6.57,13.44    | - |
| chr1 | 17906441 | 17906515 | CSAR_peak_! | 6.21          | - |
| chr1 | 17922905 | 17922960 | CSAR_peak_! | 7.27          | - |
| chr1 | 17923035 | 17923082 | CSAR_peak_! | 5.86          | - |
| chr1 | 17923302 | 17923359 | CSAR_peak_! | 8.14,9.77     | - |
| chr1 | 17923459 | 17923496 | CSAR_peak_! | 6.44,10.31    | - |
| chr1 | 17923661 | 17923725 | CSAR_peak_! | 12.59,10.31,1 | - |
| chr1 | 17924051 | 17924101 | CSAR_peak_! | 7.27          | - |
| chr1 | 17924291 | 17924357 | CSAR_peak_! | 7.27          | - |
| chr1 | 17924830 | 17924923 | CSAR_peak_! | 19.36,7.27    | - |
| chr1 | 17925013 | 17925080 | CSAR_peak_! | 8.28          | - |
| chr1 | 17925239 | 17925294 | CSAR_peak_! | 9.58          | - |
| chr1 | 17925460 | 17925543 | CSAR_peak_! | 7.27          | - |
| chr1 | 17925832 | 17925893 | CSAR_peak_! | 10.83         | - |
| chr1 | 17926418 | 17926524 | CSAR_peak_! | 7.27          | - |
| chr1 | 17927366 | 17927402 | CSAR_peak_! | 7.27          | - |
| chr1 | 17927831 | 17927868 | CSAR_peak_! | 6.21          | - |
| chr1 | 17928077 | 17928193 | CSAR_peak_! | 7.58,6.03     | - |
| chr1 | 17971380 | 17971441 | CSAR_peak_! | 7.27,10.95,9. | - |
| chr1 | 17972492 | 17972540 | CSAR_peak_! | 12.13         | - |
| chr1 | 17974016 | 17974066 | CSAR_peak_! | 7.27          | - |
| chr1 | 17974216 | 17974275 | CSAR_peak_! | 7.68          | - |
| chr1 | 17974473 | 17974547 | CSAR_peak_! | 8.2,7.27      | - |
| chr1 | 17982478 | 17982509 | CSAR_peak_! | 6.21          | - |
| chr1 | 18044057 | 18044100 | CSAR_peak_! | 8.39,6.21     | - |
| chr1 | 18044842 | 18044882 | CSAR_peak_! | 7.27          | - |
| chr1 | 18045525 | 18045583 | CSAR_peak_! | 8.39,7.58     | - |
| chr1 | 18046512 | 18046551 | CSAR_peak_! | 7.27          | - |
| chr1 | 18046633 | 18046665 | CSAR_peak_! | 8.39          | - |
| chr1 | 18046819 | 18046869 | CSAR_peak_! | 6.21          | - |
| chr1 | 18065884 | 18065923 | CSAR_peak_! | 6.44          | - |
| chr1 | 18066082 | 18066214 | CSAR_peak_! | 6.21,8.39,7.2 | - |
| chr1 | 18066422 | 18066483 | CSAR_peak_! | 13.44         | - |
| chr1 | 18066751 | 18066841 | CSAR_peak_! | 12.13         | - |
| chr1 | 18066965 | 18067031 | CSAR_peak_! | 25.91,13.48   | - |
| chr1 | 18067174 | 18067233 | CSAR_peak_! | 9.77,10.83,1  | - |
| chr1 | 18067319 | 18067364 | CSAR_peak_! | 14.88         | - |
| chr1 | 18069683 | 18069720 | CSAR_peak_! | 7.27          | - |
| chr1 | 18085093 | 18085155 | CSAR_peak_! | 10.83         | - |
| chr1 | 18085263 | 18085298 | CSAR_peak_! | 8.28          | - |
| chr1 | 18085408 | 18085467 | CSAR_peak_! | 9.41          | - |

|      |          |          |             |               |   |
|------|----------|----------|-------------|---------------|---|
| chr1 | 18113876 | 18113931 | CSAR_peak_! | 19.36         | - |
| chr1 | 18115352 | 18115402 | CSAR_peak_! | 7.27          | - |
| chr1 | 18139435 | 18139467 | CSAR_peak_! | 6.22          | - |
| chr1 | 18139994 | 18140020 | CSAR_peak_! | 6.21          | - |
| chr1 | 18140732 | 18140785 | CSAR_peak_! | 6.21,8.65     | - |
| chr1 | 18141317 | 18141338 | CSAR_peak_! | 14.88         | - |
| chr1 | 18141477 | 18141520 | CSAR_peak_! | 6.44          | - |
| chr1 | 18141744 | 18141812 | CSAR_peak_! | 9.58          | - |
| chr1 | 18142109 | 18142184 | CSAR_peak_! | 8.39,9.77,16. | - |
| chr1 | 18142558 | 18142609 | CSAR_peak_! | 7.27          | - |
| chr1 | 18142831 | 18142861 | CSAR_peak_! | 7.27          | - |
| chr1 | 18143766 | 18143825 | CSAR_peak_! | 6.21          | - |
| chr1 | 18144075 | 18144124 | CSAR_peak_! | 17.82         | - |
| chr1 | 18144210 | 18144268 | CSAR_peak_! | 17.82,8.14    | - |
| chr1 | 18144272 | 18144284 | CSAR_peak_! | 6.44          | - |
| chr1 | 18144499 | 18144526 | CSAR_peak_! | 10.02         | - |
| chr1 | 18144762 | 18144807 | CSAR_peak_! | 7.58          | - |
| chr1 | 18144908 | 18144971 | CSAR_peak_! | 19.36,5.86    | - |
| chr1 | 18145026 | 18145137 | CSAR_peak_! | 6.95,9.41,10. | - |
| chr1 | 18145471 | 18145529 | CSAR_peak_! | 19.36,7.27    | - |
| chr1 | 18147741 | 18147794 | CSAR_peak_! | 9.77          | - |
| chr1 | 18148756 | 18148804 | CSAR_peak_! | 6.21          | - |
| chr1 | 18185628 | 18185656 | CSAR_peak_! | 7.27          | - |
| chr1 | 18185825 | 18185869 | CSAR_peak_! | 7.27          | - |
| chr1 | 18186885 | 18186921 | CSAR_peak_! | 6.21          | - |
| chr1 | 18218531 | 18218587 | CSAR_peak_! | 21.74,17.99   | - |
| chr1 | 18218609 | 18218690 | CSAR_peak_! | 35.4,12.15    | - |
| chr1 | 18268812 | 18268870 | CSAR_peak_! | 8.14,6.21,6.5 | - |
| chr1 | 18269110 | 18269147 | CSAR_peak_! | 5.86          | - |
| chr1 | 18313817 | 18313869 | CSAR_peak_! | 6.21          | - |
| chr1 | 18314670 | 18314721 | CSAR_peak_! | 7.58,8.52     | - |
| chr1 | 18314723 | 18314762 | CSAR_peak_! | 6.81          | - |
| chr1 | 18315052 | 18315144 | CSAR_peak_! | 7.27,10.83    | - |
| chr1 | 18315199 | 18315289 | CSAR_peak_! | 5.62,7.27     | - |
| chr1 | 18315333 | 18315476 | CSAR_peak_! | 9.58,7.27     | - |
| chr1 | 18315623 | 18315686 | CSAR_peak_! | 8.14          | - |
| chr1 | 18316079 | 18316134 | CSAR_peak_! | 9.58          | - |
| chr1 | 18317712 | 18317782 | CSAR_peak_! | 19.36,17.82,( | - |
| chr1 | 18318608 | 18318721 | CSAR_peak_! | 29.4          | - |
| chr1 | 18318800 | 18318863 | CSAR_peak_! | 9.58,12.13    | - |
| chr1 | 18319717 | 18319862 | CSAR_peak_! | 17.82,12.17   | - |
| chr1 | 18320010 | 18320063 | CSAR_peak_! | 7.27,7.27     | - |

|      |          |          |             |                |   |
|------|----------|----------|-------------|----------------|---|
| chr1 | 18320420 | 18320515 | CSAR_peak_! | 26.32,32.86    | - |
| chr1 | 18320552 | 18320602 | CSAR_peak_! | 7.27           | - |
| chr1 | 18320622 | 18320685 | CSAR_peak_! | 12.13,9.58     | - |
| chr1 | 18321108 | 18321160 | CSAR_peak_! | 17.82,10.95    | - |
| chr1 | 18321206 | 18321337 | CSAR_peak_! | 10.83,32.46    | - |
| chr1 | 18321386 | 18321601 | CSAR_peak_! | 25.08,25.62    | - |
| chr1 | 18321609 | 18321738 | CSAR_peak_! | 17.51,6.03,4.1 | - |
| chr1 | 18321778 | 18321850 | CSAR_peak_! | 33.31,33.31    | - |
| chr1 | 18321962 | 18322203 | CSAR_peak_! | 33.46,51.41    | - |
| chr1 | 18322216 | 18322283 | CSAR_peak_! | 44.02,31.5     | - |
| chr1 | 18358008 | 18358065 | CSAR_peak_! | 8.39           | - |
| chr1 | 18379085 | 18379129 | CSAR_peak_! | 9.58           | - |
| chr1 | 18381574 | 18381631 | CSAR_peak_! | 6.21           | - |
| chr1 | 18382289 | 18382338 | CSAR_peak_! | 9.58           | - |
| chr1 | 18382525 | 18382580 | CSAR_peak_! | 6.21           | - |
| chr1 | 18382655 | 18382747 | CSAR_peak_! | 17.82,10.82,1  | - |
| chr1 | 18382919 | 18382961 | CSAR_peak_! | 8.39,7.27      | - |
| chr1 | 18383117 | 18383152 | CSAR_peak_! | 7.27           | - |
| chr1 | 18383283 | 18383402 | CSAR_peak_! | 16.11          | - |
| chr1 | 18383469 | 18383483 | CSAR_peak_! | 9.58           | - |
| chr1 | 18388850 | 18388905 | CSAR_peak_! | 22.68,71.89    | - |
| chr1 | 18391718 | 18391776 | CSAR_peak_! | 6.21           | - |
| chr1 | 18391842 | 18391885 | CSAR_peak_! | 7.27           | - |
| chr1 | 18392562 | 18392636 | CSAR_peak_! | 13.48,6.21     | - |
| chr1 | 18403088 | 18403127 | CSAR_peak_! | 9.27,13.48     | - |
| chr1 | 18403205 | 18403282 | CSAR_peak_! | 11.14,20.43    | - |
| chr1 | 18403366 | 18403415 | CSAR_peak_! | 9.58           | - |
| chr1 | 18428007 | 18428134 | CSAR_peak_! | 19.28,33.36,1  | - |
| chr1 | 18455454 | 18455493 | CSAR_peak_! | 6.21           | - |
| chr1 | 18494666 | 18494800 | CSAR_peak_! | 8.14,6.57,8.6  | - |
| chr1 | 18495199 | 18495267 | CSAR_peak_! | 9.55,10.82     | - |
| chr1 | 18495789 | 18495857 | CSAR_peak_! | 9.58           | - |
| chr1 | 18496414 | 18496460 | CSAR_peak_! | 13.48,9.97     | - |
| chr1 | 18496564 | 18496618 | CSAR_peak_! | 8.39,10.83     | - |
| chr1 | 18496700 | 18496751 | CSAR_peak_! | 12.13          | - |
| chr1 | 18497129 | 18497160 | CSAR_peak_! | 7.27           | - |
| chr1 | 18501314 | 18501396 | CSAR_peak_! | 17.82,8.39     | - |
| chr1 | 18501967 | 18502014 | CSAR_peak_! | 10.83,14.88    | - |
| chr1 | 18502110 | 18502303 | CSAR_peak_! | 26.55,5.62,3.1 | - |
| chr1 | 18502374 | 18502426 | CSAR_peak_! | 16.34,16.25    | - |
| chr1 | 18502854 | 18502914 | CSAR_peak_! | 8.65           | - |
| chr1 | 18503588 | 18503637 | CSAR_peak_! | 7.27           | - |

|      |          |          |             |               |   |
|------|----------|----------|-------------|---------------|---|
| chr1 | 18516129 | 18516182 | CSAR_peak_! | 6.57          | - |
| chr1 | 18523824 | 18523883 | CSAR_peak_! | 9.58          | - |
| chr1 | 18524321 | 18524375 | CSAR_peak_! | 18.65,12.13   | - |
| chr1 | 18524521 | 18524630 | CSAR_peak_! | 29.4,28.21    | - |
| chr1 | 18524671 | 18524682 | CSAR_peak_! | 9.58          | - |
| chr1 | 18524781 | 18524810 | CSAR_peak_! | 12.13         | - |
| chr1 | 18524926 | 18524975 | CSAR_peak_! | 9.58          | - |
| chr1 | 18525105 | 18525186 | CSAR_peak_! | 13.48,8.28    | - |
| chr1 | 18525495 | 18525564 | CSAR_peak_! | 8.39,6.85     | - |
| chr1 | 18526084 | 18526165 | CSAR_peak_! | 6.21          | - |
| chr1 | 18526280 | 18526287 | CSAR_peak_! | 12.17         | - |
| chr1 | 18526452 | 18526498 | CSAR_peak_! | 12.17         | - |
| chr1 | 18527036 | 18527083 | CSAR_peak_! | 17.82         | - |
| chr1 | 18527736 | 18527781 | CSAR_peak_! | 8.52,5.86     | - |
| chr1 | 18527786 | 18527847 | CSAR_peak_! | 8.65,7.27     | - |
| chr1 | 18527954 | 18527973 | CSAR_peak_! | 10.83         | - |
| chr1 | 18528369 | 18528402 | CSAR_peak_! | 7.92          | - |
| chr1 | 18528404 | 18528435 | CSAR_peak_! | 10.25         | - |
| chr1 | 18528550 | 18528679 | CSAR_peak_! | 17.3,8.44,15. | - |
| chr1 | 18528800 | 18528923 | CSAR_peak_! | 8.1,17.88     | - |
| chr1 | 18529209 | 18529263 | CSAR_peak_! | 12.31         | - |
| chr1 | 18529538 | 18529640 | CSAR_peak_! | 21.94,16.33   | - |
| chr1 | 18530330 | 18530337 | CSAR_peak_! | 6.21          | - |
| chr1 | 18530427 | 18530483 | CSAR_peak_! | 8.95          | - |
| chr1 | 18531177 | 18531348 | CSAR_peak_! | 16.11,16.33,; | - |
| chr1 | 18531485 | 18531553 | CSAR_peak_! | 14.88         | - |
| chr1 | 18532193 | 18532251 | CSAR_peak_! | 6.85          | - |
| chr1 | 18532738 | 18532802 | CSAR_peak_! | 20.94,7.27    | - |
| chr1 | 18533109 | 18533145 | CSAR_peak_! | 6.03          | - |
| chr1 | 18533271 | 18533318 | CSAR_peak_! | 13.66,19.36   | - |
| chr1 | 18533406 | 18533455 | CSAR_peak_! | 12.13,17.82   | - |
| chr1 | 18533582 | 18533638 | CSAR_peak_! | 13.48         | - |
| chr1 | 18534647 | 18534701 | CSAR_peak_! | 7.27          | - |
| chr1 | 18534741 | 18534773 | CSAR_peak_! | 7.68          | - |
| chr1 | 18535074 | 18535179 | CSAR_peak_! | 22.58,6.44    | - |
| chr1 | 18535258 | 18535309 | CSAR_peak_! | 9.58          | - |
| chr1 | 18535432 | 18535480 | CSAR_peak_! | 10.83         | - |
| chr1 | 18536022 | 18536082 | CSAR_peak_! | 8.39,10.83    | - |
| chr1 | 18536124 | 18536181 | CSAR_peak_! | 7.27,13.48    | - |
| chr1 | 18536382 | 18536414 | CSAR_peak_! | 6.57,5.86     | - |
| chr1 | 18536487 | 18536540 | CSAR_peak_! | 7.92          | - |
| chr1 | 18536928 | 18536963 | CSAR_peak_! | 6.21          | - |

|      |          |          |             |                |   |
|------|----------|----------|-------------|----------------|---|
| chr1 | 18538391 | 18538441 | CSAR_peak_! | 6.21           | - |
| chr1 | 18538753 | 18538815 | CSAR_peak_! | 6.57,10.31     | - |
| chr1 | 18538893 | 18538974 | CSAR_peak_! | 10.33,14.34    | - |
| chr1 | 18538977 | 18539085 | CSAR_peak_! | 17.82,17.82,!  | - |
| chr1 | 18539455 | 18539493 | CSAR_peak_! | 6.21           | - |
| chr1 | 18569964 | 18570036 | CSAR_peak_! | 8.39           | - |
| chr1 | 18570347 | 18570382 | CSAR_peak_! | 6.21           | - |
| chr1 | 18570475 | 18570526 | CSAR_peak_! | 6.21           | - |
| chr1 | 18571629 | 18571677 | CSAR_peak_! | 14.76          | - |
| chr1 | 18571709 | 18571750 | CSAR_peak_! | 9.77           | - |
| chr1 | 18572538 | 18572572 | CSAR_peak_! | 10.83          | - |
| chr1 | 18572666 | 18572737 | CSAR_peak_! | 21.31,16.08    | - |
| chr1 | 18573634 | 18573668 | CSAR_peak_! | 9.58           | - |
| chr1 | 18573753 | 18573817 | CSAR_peak_! | 6.21,7.27      | - |
| chr1 | 18573825 | 18573888 | CSAR_peak_! | 17.82,9.58     | - |
| chr1 | 18574419 | 18574477 | CSAR_peak_! | 8.39,7.27      | - |
| chr1 | 18574742 | 18574759 | CSAR_peak_! | 12.13          | - |
| chr1 | 18577044 | 18577094 | CSAR_peak_! | 14.88          | - |
| chr1 | 18577418 | 18577513 | CSAR_peak_! | 14.76,13.44    | - |
| chr1 | 18591676 | 18591730 | CSAR_peak_! | 8.39           | - |
| chr1 | 18591866 | 18591961 | CSAR_peak_! | 12.31,5.86     | - |
| chr1 | 18591972 | 18592039 | CSAR_peak_! | 7.27,7.27      | - |
| chr1 | 18592343 | 18592384 | CSAR_peak_! | 8.39           | - |
| chr1 | 18592709 | 18592727 | CSAR_peak_! | 18.95,6.52     | - |
| chr1 | 18592777 | 18592962 | CSAR_peak_! | 9.55,22.69,1:  | - |
| chr1 | 18593201 | 18593295 | CSAR_peak_! | 9.58,9.58      | - |
| chr1 | 18593321 | 18593397 | CSAR_peak_! | 8.2,7.27,9.58- | - |
| chr1 | 18593448 | 18593495 | CSAR_peak_! | 6.21           | - |
| chr1 | 18593886 | 18593947 | CSAR_peak_! | 6.21,9.77      | - |
| chr1 | 18593965 | 18593999 | CSAR_peak_! | 13.85,6.21     | - |
| chr1 | 18594045 | 18594125 | CSAR_peak_! | 33.47,13.48    | - |
| chr1 | 18594145 | 18594182 | CSAR_peak_! | 12.17          | - |
| chr1 | 18594235 | 18594247 | CSAR_peak_! | 10.62          | - |
| chr1 | 18594372 | 18594425 | CSAR_peak_! | 11.63,20.18    | - |
| chr1 | 18594537 | 18594564 | CSAR_peak_! | 9.77           | - |
| chr1 | 18594705 | 18594778 | CSAR_peak_! | 20.79,9.35     | - |
| chr1 | 18595061 | 18595151 | CSAR_peak_! | 9.41,16.11     | - |
| chr1 | 18595160 | 18595182 | CSAR_peak_! | 9.61           | - |
| chr1 | 18595340 | 18595431 | CSAR_peak_! | 20.05,6.44     | - |
| chr1 | 18595739 | 18595800 | CSAR_peak_! | 7.58           | - |
| chr1 | 18597161 | 18597208 | CSAR_peak_! | 9.58           | - |
| chr1 | 18597513 | 18597552 | CSAR_peak_! | 9.58           | - |

|      |          |          |             |               |   |
|------|----------|----------|-------------|---------------|---|
| chr1 | 18597555 | 18597593 | CSAR_peak_! | 7.58          | - |
| chr1 | 18615908 | 18615954 | CSAR_peak_! | 6.21          | - |
| chr1 | 18619058 | 18619137 | CSAR_peak_! | 18.95         | - |
| chr1 | 18619342 | 18619384 | CSAR_peak_! | 6.21          | - |
| chr1 | 18619634 | 18619764 | CSAR_peak_! | 7.27          | - |
| chr1 | 18620867 | 18621038 | CSAR_peak_! | 9.58          | - |
| chr1 | 18621168 | 18621213 | CSAR_peak_! | 6.21          | - |
| chr1 | 18621370 | 18621438 | CSAR_peak_! | 9.58          | - |
| chr1 | 18628810 | 18628853 | CSAR_peak_! | 8.28          | - |
| chr1 | 18629431 | 18629483 | CSAR_peak_! | 6.81          | - |
| chr1 | 18629668 | 18629717 | CSAR_peak_! | 5.86,8.14     | - |
| chr1 | 18637402 | 18637480 | CSAR_peak_! | 17.82,12.13   | - |
| chr1 | 18637861 | 18637910 | CSAR_peak_! | 7.27          | - |
| chr1 | 18682664 | 18682725 | CSAR_peak_! | 7.27          | - |
| chr1 | 18682847 | 18682952 | CSAR_peak_! | 5.86,6.22,9.7 | - |
| chr1 | 18683680 | 18683733 | CSAR_peak_! | 7.92          | - |
| chr1 | 18683941 | 18684069 | CSAR_peak_! | 7.27,10.83    | - |
| chr1 | 18685557 | 18685619 | CSAR_peak_! | 8.39          | - |
| chr1 | 18688609 | 18688662 | CSAR_peak_! | 7.27          | - |
| chr1 | 18688957 | 18689006 | CSAR_peak_! | 9.58          | - |
| chr1 | 18708663 | 18708706 | CSAR_peak_! | 7.27          | - |
| chr1 | 18709851 | 18709985 | CSAR_peak_! | 13.48,10.31   | - |
| chr1 | 18710808 | 18710858 | CSAR_peak_! | 14.88         | - |
| chr1 | 18711208 | 18711273 | CSAR_peak_! | 8.39          | - |
| chr1 | 18711853 | 18711905 | CSAR_peak_! | 6.03,9.77     | - |
| chr1 | 18712379 | 18712481 | CSAR_peak_! | 8.39          | - |
| chr1 | 18713586 | 18713678 | CSAR_peak_! | 8.95,8.13     | - |
| chr1 | 18713746 | 18713785 | CSAR_peak_! | 6.21          | - |
| chr1 | 18714606 | 18714632 | CSAR_peak_! | 7.27          | - |
| chr1 | 18733943 | 18734021 | CSAR_peak_! | 12.13         | - |
| chr1 | 18737814 | 18737882 | CSAR_peak_! | 18.73         | - |
| chr1 | 18738008 | 18738066 | CSAR_peak_! | 7.27,6.21     | - |
| chr1 | 18738558 | 18738647 | CSAR_peak_! | 7.58          | - |
| chr1 | 18755630 | 18755681 | CSAR_peak_! | 7.27          | - |
| chr1 | 18756892 | 18756953 | CSAR_peak_! | 6.21,7.27     | - |
| chr1 | 18756986 | 18757036 | CSAR_peak_! | 9.58          | - |
| chr1 | 18757617 | 18757683 | CSAR_peak_! | 7.27,13.48    | - |
| chr1 | 18757762 | 18757922 | CSAR_peak_! | 16.33,15.68,- | - |
| chr1 | 18758080 | 18758173 | CSAR_peak_! | 8.39,7.27     | - |
| chr1 | 18758175 | 18758197 | CSAR_peak_! | 6.21          | - |
| chr1 | 18775389 | 18775437 | CSAR_peak_! | 6.21          | - |
| chr1 | 18775618 | 18775662 | CSAR_peak_! | 12.17         | - |



|      |          |          |             |                   |   |
|------|----------|----------|-------------|-------------------|---|
| chr1 | 18775741 | 18775811 | CSAR_peak_! | 14.88,9.77        | - |
| chr1 | 19052221 | 19052255 | CSAR_peak_! | 7.27              | - |
| chr1 | 19052323 | 19052376 | CSAR_peak_! | 7.27              | - |
| chr1 | 19099996 | 19100073 | CSAR_peak_! | 7.27              | - |
| chr1 | 19100162 | 19100199 | CSAR_peak_! | 7.27              | - |
| chr1 | 19100281 | 19100339 | CSAR_peak_! | 17.82             | - |
| chr1 | 19100433 | 19100488 | CSAR_peak_! | 8.39              | - |
| chr1 | 19100803 | 19100904 | CSAR_peak_! | 8.65              | - |
| chr1 | 19103054 | 19103118 | CSAR_peak_! | 17.82             | - |
| chr1 | 19103369 | 19103451 | CSAR_peak_! | 7.92,7.27         | - |
| chr1 | 19103831 | 19103875 | CSAR_peak_! | 8.39              | - |
| chr1 | 19104625 | 19104827 | CSAR_peak_! | 14.88,22.58,14.88 | - |
| chr1 | 19118122 | 19118173 | CSAR_peak_! | 13.48             | - |
| chr1 | 19118286 | 19118382 | CSAR_peak_! | 7.58              | - |
| chr1 | 19120115 | 19120154 | CSAR_peak_! | 7.27,6.21         | - |
| chr1 | 19120333 | 19120445 | CSAR_peak_! | 7.27,12.31        | - |
| chr1 | 19120769 | 19120796 | CSAR_peak_! | 8.39              | - |
| chr1 | 19120882 | 19120953 | CSAR_peak_! | 18.65             | - |
| chr1 | 19122424 | 19122467 | CSAR_peak_! | 6.21              | - |
| chr1 | 19122604 | 19122676 | CSAR_peak_! | 9.58,9.58         | - |
| chr1 | 19123311 | 19123364 | CSAR_peak_! | 8.39              | - |
| chr1 | 19123469 | 19123527 | CSAR_peak_! | 6.21              | - |
| chr1 | 19123762 | 19123953 | CSAR_peak_! | 10.83,24.21       | - |
| chr1 | 19123971 | 19124016 | CSAR_peak_! | 6.21              | - |
| chr1 | 19124294 | 19124371 | CSAR_peak_! | 9.58,7.27         | - |
| chr1 | 19125616 | 19125696 | CSAR_peak_! | 6.21              | - |
| chr1 | 19125725 | 19125824 | CSAR_peak_! | 7.27              | - |
| chr1 | 19126369 | 19126429 | CSAR_peak_! | 12.13             | - |
| chr1 | 19126841 | 19126895 | CSAR_peak_! | 5.86,7.27         | - |
| chr1 | 19126999 | 19127052 | CSAR_peak_! | 9.58              | - |
| chr1 | 19128647 | 19128809 | CSAR_peak_! | 8.39,14.34,14.34  | - |
| chr1 | 19128889 | 19128932 | CSAR_peak_! | 9.58,8.65         | - |
| chr1 | 19129218 | 19129261 | CSAR_peak_! | 6.57              | - |
| chr1 | 19130801 | 19130858 | CSAR_peak_! | 10.02             | - |
| chr1 | 19131034 | 19131091 | CSAR_peak_! | 7.27,10.02        | - |
| chr1 | 19131466 | 19131501 | CSAR_peak_! | 6.03              | - |
| chr1 | 19131624 | 19131640 | CSAR_peak_! | 6.21              | - |
| chr1 | 19131974 | 19132022 | CSAR_peak_! | 9.58,9.58         | - |
| chr1 | 19143553 | 19143605 | CSAR_peak_! | 8.39              | - |
| chr1 | 19143626 | 19143676 | CSAR_peak_! | 7.27              | - |
| chr1 | 19160026 | 19160073 | CSAR_peak_! | 7.27              | - |
| chr1 | 19175970 | 19176035 | CSAR_peak_! | 24.21,12.31       | - |

|      |          |          |             |                |   |
|------|----------|----------|-------------|----------------|---|
| chr1 | 19176543 | 19176601 | CSAR_peak_! | 12.13,11.14    | - |
| chr1 | 19176712 | 19176793 | CSAR_peak_! | 8.39           | - |
| chr1 | 19177210 | 19177227 | CSAR_peak_! | 6.03,7.27      | - |
| chr1 | 19177381 | 19177502 | CSAR_peak_! | 7.27,9.58,7.2  | - |
| chr1 | 19178023 | 19178060 | CSAR_peak_! | 8.39           | - |
| chr1 | 19179126 | 19179222 | CSAR_peak_! | 7.27           | - |
| chr1 | 19179325 | 19179361 | CSAR_peak_! | 6.21           | - |
| chr1 | 19179596 | 19179649 | CSAR_peak_! | 7.58           | - |
| chr1 | 19188094 | 19188128 | CSAR_peak_! | 7.27           | - |
| chr1 | 19220515 | 19220629 | CSAR_peak_! | 31.2           | - |
| chr1 | 19221280 | 19221312 | CSAR_peak_! | 6.1            | - |
| chr1 | 19221350 | 19221439 | CSAR_peak_! | 12.17,19.36    | - |
| chr1 | 19221471 | 19221596 | CSAR_peak_! | 16.25,7.29,1(- | - |
| chr1 | 19221731 | 19221949 | CSAR_peak_! | 20.76,7.27,1(- | - |
| chr1 | 19222008 | 19222074 | CSAR_peak_! | 17.37,17.82    | - |
| chr1 | 19222166 | 19222219 | CSAR_peak_! | 13.85,27.11    | - |
| chr1 | 19222220 | 19222311 | CSAR_peak_! | 12.13,8.28     | - |
| chr1 | 19222427 | 19222503 | CSAR_peak_! | 17.82,8.28     | - |
| chr1 | 19222544 | 19222626 | CSAR_peak_! | 9.27,16.11     | - |
| chr1 | 19222732 | 19222800 | CSAR_peak_! | 9.58,14.88     | - |
| chr1 | 19222808 | 19222869 | CSAR_peak_! | 7.92           | - |
| chr1 | 19223152 | 19223219 | CSAR_peak_! | 25.18,6.71     | - |
| chr1 | 19223338 | 19223404 | CSAR_peak_! | 10.95          | - |
| chr1 | 19223472 | 19223617 | CSAR_peak_! | 31.72,9.72     | - |
| chr1 | 19223717 | 19223752 | CSAR_peak_! | 9.58           | - |
| chr1 | 19223790 | 19224185 | CSAR_peak_! | 24.52,22.52,(- | - |
| chr1 | 19224944 | 19224991 | CSAR_peak_! | 8.39,7.58      | - |
| chr1 | 19225126 | 19225429 | CSAR_peak_! | 27.83,7.27,7.- | - |
| chr1 | 19225502 | 19225613 | CSAR_peak_! | 19.36,20.43,(- | - |
| chr1 | 19237981 | 19238032 | CSAR_peak_! | 8.65           | - |
| chr1 | 19239741 | 19239814 | CSAR_peak_! | 8.09           | - |
| chr1 | 19240080 | 19240163 | CSAR_peak_! | 6.21           | - |
| chr1 | 19240327 | 19240395 | CSAR_peak_! | 13.66          | - |
| chr1 | 19241523 | 19241633 | CSAR_peak_! | 9.27           | - |
| chr1 | 19241867 | 19241905 | CSAR_peak_! | 6.21           | - |
| chr1 | 19243524 | 19243620 | CSAR_peak_! | 21.56,14.88    | - |
| chr1 | 19243684 | 19243714 | CSAR_peak_! | 9.77           | - |
| chr1 | 19243788 | 19243854 | CSAR_peak_! | 10.02,20.94,(- | - |
| chr1 | 19243946 | 19244059 | CSAR_peak_! | 22.56,31.2     | - |
| chr1 | 19244334 | 19244427 | CSAR_peak_! | 15,6.85        | - |
| chr1 | 19244532 | 19244563 | CSAR_peak_! | 8.65,7.92      | - |
| chr1 | 19244604 | 19244652 | CSAR_peak_! | 12.13          | - |

|      |          |          |             |                |   |
|------|----------|----------|-------------|----------------|---|
| chr1 | 19244991 | 19245028 | CSAR_peak_! | 9.58           | - |
| chr1 | 19245121 | 19245135 | CSAR_peak_! | 12.13          | - |
| chr1 | 19245886 | 19245943 | CSAR_peak_! | 7.27           | - |
| chr1 | 19247284 | 19247317 | CSAR_peak_! | 6.21           | - |
| chr1 | 19249445 | 19249513 | CSAR_peak_! | 14.88,12.13    | - |
| chr1 | 19249524 | 19249569 | CSAR_peak_! | 8.39           | - |
| chr1 | 19249613 | 19249668 | CSAR_peak_! | 10.83,6.52     | - |
| chr1 | 19249673 | 19249867 | CSAR_peak_! | 17.82,20.43    | - |
| chr1 | 19295974 | 19296057 | CSAR_peak_! | 6.21,9.58      | - |
| chr1 | 19296313 | 19296384 | CSAR_peak_! | 5.86,7.27      | - |
| chr1 | 19296543 | 19296609 | CSAR_peak_! | 7.58,10.83,1!  | - |
| chr1 | 19296794 | 19296892 | CSAR_peak_! | 16.55,11.63    | - |
| chr1 | 19296979 | 19297044 | CSAR_peak_! | 10.95          | - |
| chr1 | 19297088 | 19297131 | CSAR_peak_! | 7.27           | - |
| chr1 | 19297176 | 19297315 | CSAR_peak_! | 5.86,12.13,2!  | - |
| chr1 | 19297570 | 19297742 | CSAR_peak_! | 19.15,20.94,!  | - |
| chr1 | 19297808 | 19297863 | CSAR_peak_! | 12.13,8.95     | - |
| chr1 | 19298269 | 19298316 | CSAR_peak_! | 8.39           | - |
| chr1 | 19298393 | 19298439 | CSAR_peak_! | 6.21           | - |
| chr1 | 19323696 | 19323739 | CSAR_peak_! | 7.27           | - |
| chr1 | 19323828 | 19323867 | CSAR_peak_! | 6.21           | - |
| chr1 | 19324065 | 19324101 | CSAR_peak_! | 11.38          | - |
| chr1 | 19324221 | 19324287 | CSAR_peak_! | 20.94,9.58     | - |
| chr1 | 19325407 | 19325439 | CSAR_peak_! | 6.03,6.21      | - |
| chr1 | 19325541 | 19325573 | CSAR_peak_! | 6.21           | - |
| chr1 | 19325803 | 19325855 | CSAR_peak_! | 7.27,8.92      | - |
| chr1 | 19410583 | 19410627 | CSAR_peak_! | 9.58,9.58      | - |
| chr1 | 19410841 | 19410896 | CSAR_peak_! | 8.39           | - |
| chr1 | 19411067 | 19411120 | CSAR_peak_! | 6.21,14.85     | - |
| chr1 | 19411371 | 19411421 | CSAR_peak_! | 9.77           | - |
| chr1 | 19411430 | 19411516 | CSAR_peak_! | 9.27,6.03,7.2! | - |
| chr1 | 19411920 | 19411952 | CSAR_peak_! | 6.21           | - |
| chr1 | 19412273 | 19412324 | CSAR_peak_! | 9.77,12.13     | - |
| chr1 | 19412772 | 19412795 | CSAR_peak_! | 7.92           | - |
| chr1 | 19412890 | 19412927 | CSAR_peak_! | 7.27           | - |
| chr1 | 19413075 | 19413118 | CSAR_peak_! | 7.27           | - |
| chr1 | 19413536 | 19413602 | CSAR_peak_! | 8.65,7.58      | - |
| chr1 | 19413875 | 19414027 | CSAR_peak_! | 9.58,13.48     | - |
| chr1 | 19414094 | 19414165 | CSAR_peak_! | 6.44,14.88     | - |
| chr1 | 19414170 | 19414223 | CSAR_peak_! | 7.27           | - |
| chr1 | 19442298 | 19442396 | CSAR_peak_! | 14.76,11.45    | - |
| chr1 | 19442676 | 19442732 | CSAR_peak_! | 7.27           | - |

|      |          |          |             |               |   |
|------|----------|----------|-------------|---------------|---|
| chr1 | 19442780 | 19442868 | CSAR_peak_! | 14.88         | - |
| chr1 | 19442880 | 19442955 | CSAR_peak_! | 16.33         | - |
| chr1 | 19443008 | 19443125 | CSAR_peak_! | 38.23,9.58    | - |
| chr1 | 19443217 | 19443274 | CSAR_peak_! | 7.27          | - |
| chr1 | 19443303 | 19443353 | CSAR_peak_! | 7.27          | - |
| chr1 | 19443359 | 19443423 | CSAR_peak_! | 16.33         | - |
| chr1 | 19453763 | 19453825 | CSAR_peak_! | 7.27          | - |
| chr1 | 19454036 | 19454095 | CSAR_peak_! | 12.13,19.36   | - |
| chr1 | 19454201 | 19454274 | CSAR_peak_! | 5.86,10.95    | - |
| chr1 | 19454374 | 19454424 | CSAR_peak_! | 19.36         | - |
| chr1 | 19468145 | 19468204 | CSAR_peak_! | 6.21          | - |
| chr1 | 19468309 | 19468366 | CSAR_peak_! | 6.57          | - |
| chr1 | 19468433 | 19468478 | CSAR_peak_! | 9.27          | - |
| chr1 | 19468547 | 19468601 | CSAR_peak_! | 14.08         | - |
| chr1 | 19468637 | 19468699 | CSAR_peak_! | 8.14          | - |
| chr1 | 19468773 | 19468800 | CSAR_peak_! | 9.58          | - |
| chr1 | 19468810 | 19468893 | CSAR_peak_! | 12.55,10.18   | - |
| chr1 | 19469118 | 19469187 | CSAR_peak_! | 12.13,7.27    | - |
| chr1 | 19469263 | 19469322 | CSAR_peak_! | 19.36,10.83   | - |
| chr1 | 19470247 | 19470331 | CSAR_peak_! | 12.13         | - |
| chr1 | 19470652 | 19470686 | CSAR_peak_! | 6.21          | - |
| chr1 | 19470689 | 19470804 | CSAR_peak_! | 17.82         | - |
| chr1 | 19471434 | 19471457 | CSAR_peak_! | 8.28          | - |
| chr1 | 19475068 | 19475126 | CSAR_peak_! | 7.27          | - |
| chr1 | 19475156 | 19475216 | CSAR_peak_! | 19.96         | - |
| chr1 | 19475388 | 19475468 | CSAR_peak_! | 8.28,10.33    | - |
| chr1 | 19475912 | 19475969 | CSAR_peak_! | 17.82         | - |
| chr1 | 19492501 | 19492544 | CSAR_peak_! | 8.39          | - |
| chr1 | 19563154 | 19563187 | CSAR_peak_! | 8.39          | - |
| chr1 | 19563407 | 19563473 | CSAR_peak_! | 7.27,6.03     | - |
| chr1 | 19563578 | 19563641 | CSAR_peak_! | 13.51,10.02   | - |
| chr1 | 19563796 | 19563838 | CSAR_peak_! | 7.27          | - |
| chr1 | 19564363 | 19564420 | CSAR_peak_! | 10.83,13.48   | - |
| chr1 | 19571175 | 19571248 | CSAR_peak_! | 15            | - |
| chr1 | 19571389 | 19571409 | CSAR_peak_! | 6.57          | - |
| chr1 | 19639007 | 19639074 | CSAR_peak_! | 8.53,12.31,6. | - |
| chr1 | 19639966 | 19640096 | CSAR_peak_! | 10.02,14.76,! | - |
| chr1 | 19640148 | 19640211 | CSAR_peak_! | 14.88,9.58    | - |
| chr1 | 19670504 | 19670549 | CSAR_peak_! | 7.27          | - |
| chr1 | 19689839 | 19689882 | CSAR_peak_! | 14.88         | - |
| chr1 | 19697275 | 19697332 | CSAR_peak_! | 7.27          | - |
| chr1 | 19697390 | 19697538 | CSAR_peak_! | 9.58          | - |

|      |          |          |             |                |   |
|------|----------|----------|-------------|----------------|---|
| chr1 | 19697674 | 19697796 | CSAR_peak_! | 17.82,14.88    | - |
| chr1 | 19697882 | 19697987 | CSAR_peak_! | 10.83,26.69    | - |
| chr1 | 19697999 | 19698110 | CSAR_peak_! | 13.51,6.44     | - |
| chr1 | 19856257 | 19856342 | CSAR_peak_! | 7.27           | - |
| chr1 | 19856390 | 19856423 | CSAR_peak_! | 6.21           | - |
| chr1 | 19865519 | 19865557 | CSAR_peak_! | 6.21           | - |
| chr1 | 19866380 | 19866420 | CSAR_peak_! | 7.27           | - |
| chr1 | 19866654 | 19866745 | CSAR_peak_! | 12.13          | - |
| chr1 | 19884969 | 19885032 | CSAR_peak_! | 12.13,18.95    | - |
| chr1 | 19886305 | 19886335 | CSAR_peak_! | 9.58           | - |
| chr1 | 19887282 | 19887324 | CSAR_peak_! | 7.58           | - |
| chr1 | 19887464 | 19887501 | CSAR_peak_! | 6.57           | - |
| chr1 | 19887620 | 19887665 | CSAR_peak_! | 6.21           | - |
| chr1 | 19891176 | 19891268 | CSAR_peak_! | 12.17          | - |
| chr1 | 19891359 | 19891467 | CSAR_peak_! | 7.27,16.33     | - |
| chr1 | 19891496 | 19891606 | CSAR_peak_! | 16.33          | - |
| chr1 | 19891680 | 19891854 | CSAR_peak_! | 16.33,13.48,-  | - |
| chr1 | 19891865 | 19891901 | CSAR_peak_! | 7.27           | - |
| chr1 | 19891978 | 19892045 | CSAR_peak_! | 21.56,10.82,-  | - |
| chr1 | 19892134 | 19892144 | CSAR_peak_! | 7.27           | - |
| chr1 | 19892359 | 19892432 | CSAR_peak_! | 9.77,9.58      | - |
| chr1 | 19892738 | 19892821 | CSAR_peak_! | 12.31,19.36    | - |
| chr1 | 19893181 | 19893236 | CSAR_peak_! | 5.79,8.39      | - |
| chr1 | 19893349 | 19893401 | CSAR_peak_! | 6.21           | - |
| chr1 | 19952808 | 19952845 | CSAR_peak_! | 7.27           | - |
| chr1 | 19953339 | 19953385 | CSAR_peak_! | 7.27           | - |
| chr1 | 19967438 | 19967488 | CSAR_peak_! | 17.82          | - |
| chr1 | 19967542 | 19967601 | CSAR_peak_! | 9.58           | - |
| chr1 | 19968462 | 19968517 | CSAR_peak_! | 7.27,16.33     | - |
| chr1 | 19970520 | 19970609 | CSAR_peak_! | 16.05          | - |
| chr1 | 19970945 | 19971055 | CSAR_peak_! | 17.82,8.39     | - |
| chr1 | 19971124 | 19971202 | CSAR_peak_! | 10.02,7.58     | - |
| chr1 | 19971345 | 19971411 | CSAR_peak_! | 12.31          | - |
| chr1 | 19971470 | 19971506 | CSAR_peak_! | 7.27           | - |
| chr1 | 19971860 | 19971949 | CSAR_peak_! | 20.43,6.78,1(- | - |
| chr1 | 19972083 | 19972127 | CSAR_peak_! | 14.88          | - |
| chr1 | 19972139 | 19972264 | CSAR_peak_! | 14.88,10.31,-  | - |
| chr1 | 19972510 | 19972559 | CSAR_peak_! | 12.17          | - |
| chr1 | 19972658 | 19972773 | CSAR_peak_! | 17.37,23.8     | - |
| chr1 | 19973144 | 19973204 | CSAR_peak_! | 9.61,12.13     | - |
| chr1 | 19973294 | 19973366 | CSAR_peak_! | 12.94,10.62    | - |
| chr1 | 19973818 | 19973935 | CSAR_peak_! | 14.76,7.73     | - |

|      |          |          |             |                |   |
|------|----------|----------|-------------|----------------|---|
| chr1 | 19991579 | 19991663 | CSAR_peak_! | 8.13,9.58      | - |
| chr1 | 19991709 | 19991808 | CSAR_peak_! | 16.19,11.96    | - |
| chr1 | 19991884 | 19991944 | CSAR_peak_! | 16.33          | - |
| chr1 | 19992025 | 19992114 | CSAR_peak_! | 9.58,7.78,5.8- |   |
| chr1 | 19992210 | 19992254 | CSAR_peak_! | 14.88          | - |
| chr1 | 19992256 | 19992391 | CSAR_peak_! | 13.92,14.76,(- |   |
| chr1 | 19992392 | 19992433 | CSAR_peak_! | 8.14           | - |
| chr1 | 19992463 | 19992577 | CSAR_peak_! | 7.58,12.13     | - |
| chr1 | 19992666 | 19992834 | CSAR_peak_! | 13.29,13.84    | - |
| chr1 | 19993011 | 19993048 | CSAR_peak_! | 14.88,12.13    | - |
| chr1 | 20065993 | 20066079 | CSAR_peak_! | 17.37,7.58     | - |
| chr1 | 20066190 | 20066241 | CSAR_peak_! | 6.21           | - |
| chr1 | 20066493 | 20066538 | CSAR_peak_! | 7.27           | - |
| chr1 | 20066719 | 20066768 | CSAR_peak_! | 14.88          | - |
| chr1 | 20066770 | 20066796 | CSAR_peak_! | 7.27           | - |
| chr1 | 20066801 | 20066833 | CSAR_peak_! | 7.27           | - |
| chr1 | 20067052 | 20067115 | CSAR_peak_! | 13.85          | - |
| chr1 | 20074320 | 20074373 | CSAR_peak_! | 13.48          | - |
| chr1 | 20074468 | 20074538 | CSAR_peak_! | 13.48          | - |
| chr1 | 20074825 | 20074892 | CSAR_peak_! | 7.26,10.33     | - |
| chr1 | 20074923 | 20074933 | CSAR_peak_! | 6.21           | - |
| chr1 | 20075016 | 20075138 | CSAR_peak_! | 6.12,13        | - |
| chr1 | 20075374 | 20075477 | CSAR_peak_! | 10.94,12.94    | - |
| chr1 | 20075622 | 20075690 | CSAR_peak_! | 9.77,11.38     | - |
| chr1 | 20075785 | 20075840 | CSAR_peak_! | 10.94,20.94    | - |
| chr1 | 20076130 | 20076206 | CSAR_peak_! | 42.33,13.47    | - |
| chr1 | 20076307 | 20076337 | CSAR_peak_! | 20.94          | - |
| chr1 | 20076348 | 20076454 | CSAR_peak_! | 6.95,25.91     | - |
| chr1 | 20076661 | 20076734 | CSAR_peak_! | 9.58,12.13     | - |
| chr1 | 20076765 | 20076805 | CSAR_peak_! | 12.17          | - |
| chr1 | 20077295 | 20077317 | CSAR_peak_! | 10.31          | - |
| chr1 | 20077442 | 20077514 | CSAR_peak_! | 17.63,22.58    | - |
| chr1 | 20077622 | 20077710 | CSAR_peak_! | 13.48,12.17    | - |
| chr1 | 20077782 | 20077906 | CSAR_peak_! | 13.48,14.88    | - |
| chr1 | 20078101 | 20078189 | CSAR_peak_! | 24.52,6.21,8.- |   |
| chr1 | 20078256 | 20078421 | CSAR_peak_! | 14.88,6.21,7.- |   |
| chr1 | 20078437 | 20078475 | CSAR_peak_! | 7.27           | - |
| chr1 | 20078650 | 20078672 | CSAR_peak_! | 7.27           | - |
| chr1 | 20078696 | 20078760 | CSAR_peak_! | 7.58           | - |
| chr1 | 20155040 | 20155164 | CSAR_peak_! | 20.94,9.61     | - |
| chr1 | 20155676 | 20155733 | CSAR_peak_! | 9.58           | - |
| chr1 | 20159336 | 20159433 | CSAR_peak_! | 13.48,6.95     | - |

|      |          |          |             |                |   |
|------|----------|----------|-------------|----------------|---|
| chr1 | 20184835 | 20184866 | CSAR_peak_! | 6.03           | - |
| chr1 | 20185784 | 20185820 | CSAR_peak_! | 12.13          | - |
| chr1 | 20185904 | 20185957 | CSAR_peak_! | 7.58,6.87      | - |
| chr1 | 20186085 | 20186129 | CSAR_peak_! | 16.11          | - |
| chr1 | 20195348 | 20195445 | CSAR_peak_! | 12.74,11.14    | - |
| chr1 | 20195580 | 20195616 | CSAR_peak_! | 6.72           | - |
| chr1 | 20195643 | 20195758 | CSAR_peak_! | 8.16,26.3,29.  | - |
| chr1 | 20195791 | 20195939 | CSAR_peak_! | 14.22,24.97    | - |
| chr1 | 20195997 | 20196089 | CSAR_peak_! | 13.47,14.08    | - |
| chr1 | 20196236 | 20196374 | CSAR_peak_! | 18.1,10.83     | - |
| chr1 | 20196472 | 20196683 | CSAR_peak_! | 29.2,54.19     | - |
| chr1 | 20196792 | 20196910 | CSAR_peak_! | 12.13,16.33    | - |
| chr1 | 20196913 | 20196929 | CSAR_peak_! | 12.17          | - |
| chr1 | 20197175 | 20197291 | CSAR_peak_! | 20.88,23.03    | - |
| chr1 | 20197587 | 20197767 | CSAR_peak_! | 18.85,7.27,2(- | - |
| chr1 | 20197905 | 20197978 | CSAR_peak_! | 25.1,14.85     | - |
| chr1 | 20198162 | 20198207 | CSAR_peak_! | 8.7,6.03       | - |
| chr1 | 20198250 | 20198302 | CSAR_peak_! | 10.88,10.25    | - |
| chr1 | 20198379 | 20198466 | CSAR_peak_! | 14.93,21.35    | - |
| chr1 | 20198719 | 20198864 | CSAR_peak_! | 12.13          | - |
| chr1 | 20198872 | 20198890 | CSAR_peak_! | 7.27           | - |
| chr1 | 20221726 | 20221743 | CSAR_peak_! | 6.21           | - |
| chr1 | 20222922 | 20222984 | CSAR_peak_! | 7.27           | - |
| chr1 | 20223168 | 20223235 | CSAR_peak_! | 7.58,17.37     | - |
| chr1 | 20223266 | 20223365 | CSAR_peak_! | 13.51,7.06     | - |
| chr1 | 20224022 | 20224129 | CSAR_peak_! | 14.76,9.77     | - |
| chr1 | 20224140 | 20224213 | CSAR_peak_! | 14.76          | - |
| chr1 | 20224814 | 20224835 | CSAR_peak_! | 7.27           | - |
| chr1 | 20276160 | 20276217 | CSAR_peak_! | 12.13          | - |
| chr1 | 20276437 | 20276525 | CSAR_peak_! | 9.58,10.95     | - |
| chr1 | 20276597 | 20276672 | CSAR_peak_! | 12.13,9.58     | - |
| chr1 | 20276867 | 20276882 | CSAR_peak_! | 6.21           | - |
| chr1 | 20276917 | 20276938 | CSAR_peak_! | 6.21           | - |
| chr1 | 20277037 | 20277042 | CSAR_peak_! | 8.95           | - |
| chr1 | 20277075 | 20277147 | CSAR_peak_! | 10.31          | - |
| chr1 | 20293743 | 20293775 | CSAR_peak_! | 6.57           | - |
| chr1 | 20293944 | 20294003 | CSAR_peak_! | 7.27           | - |
| chr1 | 20294160 | 20294247 | CSAR_peak_! | 13.51          | - |
| chr1 | 20295132 | 20295187 | CSAR_peak_! | 9.72,8.13      | - |
| chr1 | 20296014 | 20296098 | CSAR_peak_! | 18.85,10.12    | - |
| chr1 | 20296185 | 20296228 | CSAR_peak_! | 20.13          | - |
| chr1 | 20296375 | 20296425 | CSAR_peak_! | 9.58           | - |

|      |          |          |             |                |   |
|------|----------|----------|-------------|----------------|---|
| chr1 | 20300122 | 20300172 | CSAR_peak_! | 7.27           | - |
| chr1 | 20306727 | 20306774 | CSAR_peak_! | 7.27           | - |
| chr1 | 20309162 | 20309212 | CSAR_peak_! | 9.77           | - |
| chr1 | 20309573 | 20309661 | CSAR_peak_! | 9.58           | - |
| chr1 | 20309764 | 20309858 | CSAR_peak_! | 17.82,16.19    | - |
| chr1 | 20309915 | 20310015 | CSAR_peak_! | 27.94,21.37    | - |
| chr1 | 20310016 | 20310105 | CSAR_peak_! | 11.39,9.58,2(- |   |
| chr1 | 20310150 | 20310266 | CSAR_peak_! | 20.43,24.21    | - |
| chr1 | 20310287 | 20310303 | CSAR_peak_! | 10.83          | - |
| chr1 | 20310308 | 20310405 | CSAR_peak_! | 27.15,9.77,1(- |   |
| chr1 | 20310417 | 20310548 | CSAR_peak_! | 19,25.04,28.(- |   |
| chr1 | 20310560 | 20310660 | CSAR_peak_! | 44.59,80.75    | - |
| chr1 | 20361622 | 20361654 | CSAR_peak_! | 6.03           | - |
| chr1 | 20394663 | 20394703 | CSAR_peak_! | 9.58           | - |
| chr1 | 20395201 | 20395297 | CSAR_peak_! | 9.58,9.58      | - |
| chr1 | 20396406 | 20396437 | CSAR_peak_! | 7.27           | - |
| chr1 | 20401758 | 20401780 | CSAR_peak_! | 6.57           | - |
| chr1 | 20409539 | 20409603 | CSAR_peak_! | 13.44          | - |
| chr1 | 20409770 | 20410011 | CSAR_peak_! | 7,19.36,18.8(- |   |
| chr1 | 20410027 | 20410100 | CSAR_peak_! | 7.27,8.39      | - |
| chr1 | 20418313 | 20418366 | CSAR_peak_! | 6.21           | - |
| chr1 | 20560544 | 20560587 | CSAR_peak_! | 6.57           | - |
| chr1 | 20561695 | 20561815 | CSAR_peak_! | 16.11,19.36    | - |
| chr1 | 20561917 | 20561977 | CSAR_peak_! | 9.77           | - |
| chr1 | 20562475 | 20562599 | CSAR_peak_! | 13.48,10.83    | - |
| chr1 | 20598172 | 20598222 | CSAR_peak_! | 7.27           | - |
| chr1 | 20617397 | 20617555 | CSAR_peak_! | 10.82,8.65,8.- |   |
| chr1 | 20617764 | 20617844 | CSAR_peak_! | 12.13,9.58     | - |
| chr1 | 20617848 | 20617915 | CSAR_peak_! | 9.58           | - |
| chr1 | 20618990 | 20619073 | CSAR_peak_! | 25.07,17.82    | - |
| chr1 | 20628439 | 20628503 | CSAR_peak_! | 14.88          | - |
| chr1 | 20654089 | 20654164 | CSAR_peak_! | 9.77           | - |
| chr1 | 20654646 | 20654702 | CSAR_peak_! | 7.27           | - |
| chr1 | 20655341 | 20655368 | CSAR_peak_! | 6.21           | - |
| chr1 | 20655405 | 20655449 | CSAR_peak_! | 10.83          | - |
| chr1 | 20655561 | 20655597 | CSAR_peak_! | 6.44           | - |
| chr1 | 20656657 | 20656742 | CSAR_peak_! | 12.13          | - |
| chr1 | 20656992 | 20657042 | CSAR_peak_! | 13.48          | - |
| chr1 | 20657141 | 20657187 | CSAR_peak_! | 6.21           | - |
| chr1 | 20657331 | 20657344 | CSAR_peak_! | 8.39           | - |
| chr1 | 20657493 | 20657603 | CSAR_peak_! | 9.58           | - |
| chr1 | 20657733 | 20657813 | CSAR_peak_! | 7.27           | - |



|      |          |          |             |                |   |
|------|----------|----------|-------------|----------------|---|
| chr1 | 20657897 | 20657946 | CSAR_peak_! | 7.27           | - |
| chr1 | 20658281 | 20658422 | CSAR_peak_! | 8.95,12.17,5.  | - |
| chr1 | 20658470 | 20658547 | CSAR_peak_! | 10.94,6.21     | - |
| chr1 | 20658551 | 20658604 | CSAR_peak_! | 9.58           | - |
| chr1 | 20661129 | 20661167 | CSAR_peak_! | 10.83          | - |
| chr1 | 20661697 | 20661734 | CSAR_peak_! | 6.21           | - |
| chr1 | 20662182 | 20662272 | CSAR_peak_! | 17.82,7.58     | - |
| chr1 | 20664377 | 20664425 | CSAR_peak_! | 10.95,9.58     | - |
| chr1 | 20667243 | 20667289 | CSAR_peak_! | 8.39,12.17     | - |
| chr1 | 20667397 | 20667438 | CSAR_peak_! | 10.83          | - |
| chr1 | 20704094 | 20704188 | CSAR_peak_! | 6.81,12.17     | - |
| chr1 | 20705438 | 20705544 | CSAR_peak_! | 32.27,21       | - |
| chr1 | 20705608 | 20705671 | CSAR_peak_! | 16.19,12.31    | - |
| chr1 | 20705681 | 20705779 | CSAR_peak_! | 14.85,13.44    | - |
| chr1 | 20705971 | 20706014 | CSAR_peak_! | 6.21           | - |
| chr1 | 20706148 | 20706242 | CSAR_peak_! | 9.58,20.43,9.  | - |
| chr1 | 20706676 | 20706888 | CSAR_peak_! | 31.73,14.88,{- | - |
| chr1 | 20715628 | 20715699 | CSAR_peak_! | 14.88,9.58     | - |
| chr1 | 20715704 | 20715731 | CSAR_peak_! | 8.39           | - |
| chr1 | 20715830 | 20715898 | CSAR_peak_! | 7.27,8.39      | - |
| chr1 | 20716590 | 20716644 | CSAR_peak_! | 5.86,6.21      | - |
| chr1 | 20717675 | 20717755 | CSAR_peak_! | 7.27,6.85,6.8- | - |
| chr1 | 20717848 | 20717900 | CSAR_peak_! | 10.83          | - |
| chr1 | 20725361 | 20725437 | CSAR_peak_! | 7.27           | - |
| chr1 | 20726144 | 20726210 | CSAR_peak_! | 6.21           | - |
| chr1 | 20726307 | 20726389 | CSAR_peak_! | 7.27           | - |
| chr1 | 20727046 | 20727113 | CSAR_peak_! | 6.03           | - |
| chr1 | 20727443 | 20727498 | CSAR_peak_! | 6.21           | - |
| chr1 | 20802923 | 20802974 | CSAR_peak_! | 7.58           | - |
| chr1 | 20802989 | 20803107 | CSAR_peak_! | 32.83,9.58     | - |
| chr1 | 20803166 | 20803199 | CSAR_peak_! | 6.21           | - |
| chr1 | 20804737 | 20804855 | CSAR_peak_! | 14.88,7.73     | - |
| chr1 | 20804999 | 20805051 | CSAR_peak_! | 6.21           | - |
| chr1 | 20805475 | 20805555 | CSAR_peak_! | 18.73,7.92     | - |
| chr1 | 20805771 | 20805856 | CSAR_peak_! | 9.58,9.58      | - |
| chr1 | 20806135 | 20806242 | CSAR_peak_! | 8.39,8.39      | - |
| chr1 | 20806676 | 20806751 | CSAR_peak_! | 10.83,7.27     | - |
| chr1 | 20806854 | 20806968 | CSAR_peak_! | 6.21,24.52     | - |
| chr1 | 20807153 | 20807200 | CSAR_peak_! | 8.28,7.92,7.2- | - |
| chr1 | 20807241 | 20807286 | CSAR_peak_! | 7.58,5.62      | - |
| chr1 | 20808942 | 20809015 | CSAR_peak_! | 7.27,13.48     | - |
| chr1 | 20842358 | 20842384 | CSAR_peak_! | 6.21           | - |

|      |          |          |             |                |   |
|------|----------|----------|-------------|----------------|---|
| chr1 | 20842885 | 20842931 | CSAR_peak_! | 8.39           | - |
| chr1 | 20843712 | 20843753 | CSAR_peak_! | 17.82          | - |
| chr1 | 20843969 | 20844013 | CSAR_peak_! | 6.21,12.13     | - |
| chr1 | 20844144 | 20844198 | CSAR_peak_! | 8.39           | - |
| chr1 | 20845066 | 20845106 | CSAR_peak_! | 7.27           | - |
| chr1 | 20879642 | 20879720 | CSAR_peak_! | 16.33,13.48    | - |
| chr1 | 20880595 | 20880642 | CSAR_peak_! | 7.27           | - |
| chr1 | 20880767 | 20880816 | CSAR_peak_! | 6.95           | - |
| chr1 | 20880920 | 20880973 | CSAR_peak_! | 12.35,7.34     | - |
| chr1 | 20880992 | 20881001 | CSAR_peak_! | 7.27           | - |
| chr1 | 20881108 | 20881169 | CSAR_peak_! | 10.18,9.77     | - |
| chr1 | 20881630 | 20881717 | CSAR_peak_! | 8.39           | - |
| chr1 | 20882735 | 20882808 | CSAR_peak_! | 6.21,13.48     | - |
| chr1 | 20883839 | 20883869 | CSAR_peak_! | 7.58           | - |
| chr1 | 20884073 | 20884154 | CSAR_peak_! | 12.13,7.27     | - |
| chr1 | 20884334 | 20884402 | CSAR_peak_! | 12.31,19.36    | - |
| chr1 | 20884451 | 20884497 | CSAR_peak_! | 7.27           | - |
| chr1 | 20884638 | 20884684 | CSAR_peak_! | 8.39           | - |
| chr1 | 20885571 | 20885737 | CSAR_peak_! | 9.58,12.31,8.  | - |
| chr1 | 20885747 | 20885838 | CSAR_peak_! | 10.95,11.14    | - |
| chr1 | 20885935 | 20885983 | CSAR_peak_! | 10.83          | - |
| chr1 | 20886017 | 20886093 | CSAR_peak_! | 16.33          | - |
| chr1 | 20886479 | 20886547 | CSAR_peak_! | 12.13,12.74    | - |
| chr1 | 20886713 | 20886778 | CSAR_peak_! | 17.82,14.88    | - |
| chr1 | 20888243 | 20888296 | CSAR_peak_! | 10.95          | - |
| chr1 | 20890043 | 20890094 | CSAR_peak_! | 7.27           | - |
| chr1 | 20892323 | 20892354 | CSAR_peak_! | 10.83          | - |
| chr1 | 20932517 | 20932563 | CSAR_peak_! | 7.27           | - |
| chr1 | 20935959 | 20936035 | CSAR_peak_! | 16.33,6.44     | - |
| chr1 | 20947608 | 20947680 | CSAR_peak_! | 6.87           | - |
| chr1 | 20967194 | 20967248 | CSAR_peak_! | 9.58,7.27      | - |
| chr1 | 20967735 | 20967899 | CSAR_peak_! | 9.58           | - |
| chr1 | 20968045 | 20968102 | CSAR_peak_! | 10.02          | - |
| chr1 | 20968231 | 20968274 | CSAR_peak_! | 9.77           | - |
| chr1 | 20968382 | 20968453 | CSAR_peak_! | 8.65           | - |
| chr1 | 20968483 | 20968612 | CSAR_peak_! | 18.73,30.21    | - |
| chr1 | 20968694 | 20969025 | CSAR_peak_! | 13.48,31.73,,- | - |
| chr1 | 20969157 | 20969263 | CSAR_peak_! | 13.44,7.27     | - |
| chr1 | 20969288 | 20969406 | CSAR_peak_! | 7.27,6.21      | - |
| chr1 | 20969418 | 20969566 | CSAR_peak_! | 8.9,7.27       | - |
| chr1 | 20969703 | 20969738 | CSAR_peak_! | 9.58           | - |
| chr1 | 20969825 | 20969923 | CSAR_peak_! | 22.56,24.21    | - |

|      |          |          |             |               |   |
|------|----------|----------|-------------|---------------|---|
| chr1 | 20970018 | 20970171 | CSAR_peak_1 | 7.34,14.88    | - |
| chr1 | 20970318 | 20970421 | CSAR_peak_1 | 15,7.7        | - |
| chr1 | 20970489 | 20970559 | CSAR_peak_1 | 16.11         | - |
| chr1 | 20970635 | 20970686 | CSAR_peak_1 | 12.17         | - |
| chr1 | 20970907 | 20971041 | CSAR_peak_1 | 39.34,8.52,6. | - |
| chr1 | 20971075 | 20971127 | CSAR_peak_1 | 6.21,7.92     | - |
| chr1 | 20971444 | 20971524 | CSAR_peak_1 | 9.77          | - |
| chr1 | 20971554 | 20971620 | CSAR_peak_1 | 9.32,13.48    | - |
| chr1 | 20984418 | 20984462 | CSAR_peak_1 | 8.39          | - |
| chr1 | 21001747 | 21001806 | CSAR_peak_1 | 10.83,7.27    | - |
| chr1 | 21001995 | 21002112 | CSAR_peak_1 | 14.85,14.96   | - |
| chr1 | 21002211 | 21002362 | CSAR_peak_1 | 25.85,12.6,9. | - |
| chr1 | 21002418 | 21002502 | CSAR_peak_1 | 6.81,12.31,1. | - |
| chr1 | 21002633 | 21002699 | CSAR_peak_1 | 12.5,12.31    | - |
| chr1 | 21002796 | 21002849 | CSAR_peak_1 | 8.39,7.58     | - |
| chr1 | 21002909 | 21002990 | CSAR_peak_1 | 8.14,10.62    | - |
| chr1 | 21003104 | 21003269 | CSAR_peak_1 | 20.94,5.86,9. | - |
| chr1 | 21003309 | 21003397 | CSAR_peak_1 | 21.35,7.27    | - |
| chr1 | 21003421 | 21003493 | CSAR_peak_1 | 8.53,9.58     | - |
| chr1 | 21003574 | 21003648 | CSAR_peak_1 | 19.36,9.41    | - |
| chr1 | 21003724 | 21003773 | CSAR_peak_1 | 18.65,17.37   | - |
| chr1 | 21003882 | 21003931 | CSAR_peak_1 | 6.21,11.28,1. | - |
| chr1 | 21003967 | 21004082 | CSAR_peak_1 | 14.88,7.92    | - |
| chr1 | 21004095 | 21004150 | CSAR_peak_1 | 7.27          | - |
| chr1 | 21004173 | 21004225 | CSAR_peak_1 | 7.58          | - |
| chr1 | 21004256 | 21004265 | CSAR_peak_1 | 6.21          | - |
| chr1 | 21004328 | 21004423 | CSAR_peak_1 | 28.62,17.37   | - |
| chr1 | 21004533 | 21004578 | CSAR_peak_1 | 10.83         | - |
| chr1 | 21004750 | 21004828 | CSAR_peak_1 | 8.14,16.33,1. | - |
| chr1 | 21005060 | 21005135 | CSAR_peak_1 | 13.29,16.33   | - |
| chr1 | 21005138 | 21005197 | CSAR_peak_1 | 7.58,12.13    | - |
| chr1 | 21005211 | 21005237 | CSAR_peak_1 | 6.85          | - |
| chr1 | 21005533 | 21005566 | CSAR_peak_1 | 13.48         | - |
| chr1 | 21005648 | 21005684 | CSAR_peak_1 | 8.39          | - |
| chr1 | 21005708 | 21005728 | CSAR_peak_1 | 7.27          | - |
| chr1 | 21005764 | 21005901 | CSAR_peak_1 | 19.36,6.64    | - |
| chr1 | 21005997 | 21006109 | CSAR_peak_1 | 7.27,9.77,14. | - |
| chr1 | 21006201 | 21006273 | CSAR_peak_1 | 9.84,7.51     | - |
| chr1 | 21006285 | 21006335 | CSAR_peak_1 | 5.86          | - |
| chr1 | 21006431 | 21006491 | CSAR_peak_1 | 33.31,17.51   | - |
| chr1 | 21006644 | 21006686 | CSAR_peak_1 | 32.27,8.92    | - |
| chr1 | 21006779 | 21006868 | CSAR_peak_1 | 33.38,8.12    | - |

|      |          |          |             |                |   |
|------|----------|----------|-------------|----------------|---|
| chr1 | 21006939 | 21007033 | CSAR_peak_  | 24.15,12.36    | - |
| chr1 | 21007175 | 21007225 | CSAR_peak_! | 14.88          | - |
| chr1 | 21007316 | 21007385 | CSAR_peak_! | 9.58,12.13     | - |
| chr1 | 21007619 | 21007694 | CSAR_peak_! | 8.39           | - |
| chr1 | 21008347 | 21008457 | CSAR_peak_! | 6.57           | - |
| chr1 | 21008864 | 21008911 | CSAR_peak_! | 6.21           | - |
| chr1 | 21009351 | 21009388 | CSAR_peak_! | 12.31          | - |
| chr1 | 21009492 | 21009542 | CSAR_peak_! | 8.14,7.27      | - |
| chr1 | 21012641 | 21012663 | CSAR_peak_! | 8.39           | - |
| chr1 | 21012827 | 21012860 | CSAR_peak_! | 7.27,9.58      | - |
| chr1 | 21013602 | 21013652 | CSAR_peak_! | 8.95           | - |
| chr1 | 21046322 | 21046398 | CSAR_peak_! | 7.58           | - |
| chr1 | 21046545 | 21046617 | CSAR_peak_! | 8.95,9.58      | - |
| chr1 | 21046701 | 21046755 | CSAR_peak_! | 6.95           | - |
| chr1 | 21046916 | 21046984 | CSAR_peak_! | 8.39           | - |
| chr1 | 21047113 | 21047184 | CSAR_peak_! | 7.27,9.58      | - |
| chr1 | 21047570 | 21047625 | CSAR_peak_! | 6.57           | - |
| chr1 | 21047858 | 21047972 | CSAR_peak_! | 10.83,8.14     | - |
| chr1 | 21048278 | 21048365 | CSAR_peak_! | 12.13,6.95,6.  | - |
| chr1 | 21052347 | 21052422 | CSAR_peak_! | 9.19,34.59,21. | - |
| chr1 | 21052484 | 21052561 | CSAR_peak_! | 6.84,8.18      | - |
| chr1 | 21052625 | 21052702 | CSAR_peak_! | 19.26,14.69    | - |
| chr1 | 21052859 | 21052954 | CSAR_peak_! | 7.36,20.05,21. | - |
| chr1 | 21073292 | 21073370 | CSAR_peak_! | 20.43,8.65     | - |
| chr1 | 21073753 | 21073804 | CSAR_peak_! | 8.65           | - |
| chr1 | 21073898 | 21073931 | CSAR_peak_! | 5.86,12.17     | - |
| chr1 | 21073966 | 21073973 | CSAR_peak_! | 7.27           | - |
| chr1 | 21074052 | 21074092 | CSAR_peak_! | 6.21           | - |
| chr1 | 21079019 | 21079104 | CSAR_peak_! | 19.36,21.94    | - |
| chr1 | 21079126 | 21079239 | CSAR_peak_! | 8.09,10.31,14. | - |
| chr1 | 21079286 | 21079380 | CSAR_peak_! | 7.58           | - |
| chr1 | 21079406 | 21079526 | CSAR_peak_! | 20.94,6.21,21. | - |
| chr1 | 21079566 | 21079630 | CSAR_peak_! | 9.58,14.76     | - |
| chr1 | 21079663 | 21079730 | CSAR_peak_! | 20.54,18.55    | - |
| chr1 | 21079862 | 21080015 | CSAR_peak_! | 25.48,6.45,21. | - |
| chr1 | 21080039 | 21080146 | CSAR_peak_! | 10.31,25.07    | - |
| chr1 | 21080176 | 21080269 | CSAR_peak_! | 16.19          | - |
| chr1 | 21090526 | 21090539 | CSAR_peak_! | 6.02           | - |
| chr1 | 21090619 | 21090668 | CSAR_peak_! | 7.58           | - |
| chr1 | 21090690 | 21090715 | CSAR_peak_! | 12.13          | - |
| chr1 | 21090799 | 21090832 | CSAR_peak_! | 9.58           | - |
| chr1 | 21091017 | 21091057 | CSAR_peak_! | 7.27           | - |

|      |          |          |             |               |   |
|------|----------|----------|-------------|---------------|---|
| chr1 | 21091221 | 21091246 | CSAR_peak_! | 10.52         | - |
| chr1 | 21091328 | 21091359 | CSAR_peak_! | 20.94         | - |
| chr1 | 21091775 | 21091821 | CSAR_peak_! | 9.58,8.39     | - |
| chr1 | 21215087 | 21215187 | CSAR_peak_! | 8.39          | - |
| chr1 | 21263483 | 21263528 | CSAR_peak_! | 7.27          | - |
| chr1 | 21264548 | 21264644 | CSAR_peak_! | 14.88,8.39    | - |
| chr1 | 21264788 | 21264864 | CSAR_peak_! | 8.39          | - |
| chr1 | 21362535 | 21362687 | CSAR_peak_! | 8.39          | - |
| chr1 | 21362773 | 21362849 | CSAR_peak_! | 15.96         | - |
| chr1 | 21362872 | 21362940 | CSAR_peak_! | 8.9,16.08     | - |
| chr1 | 21363241 | 21363325 | CSAR_peak_! | 27.64,17.82   | - |
| chr1 | 21363510 | 21363632 | CSAR_peak_! | 11.14,14.34   | - |
| chr1 | 21363758 | 21363808 | CSAR_peak_! | 7.27          | - |
| chr1 | 21363831 | 21363877 | CSAR_peak_! | 9.58          | - |
| chr1 | 21363921 | 21364028 | CSAR_peak_! | 8.28,7.27,6.2 | - |
| chr1 | 21364291 | 21364364 | CSAR_peak_! | 21.22,14.76   | - |
| chr1 | 21430257 | 21430331 | CSAR_peak_! | 13.48         | - |
| chr1 | 21432731 | 21432789 | CSAR_peak_! | 10.83,12.13   | - |
| chr1 | 21434036 | 21434132 | CSAR_peak_! | 12.13         | - |
| chr1 | 21434201 | 21434252 | CSAR_peak_! | 12.13         | - |
| chr1 | 21434528 | 21434601 | CSAR_peak_! | 16.33,12.13   | - |
| chr1 | 21434718 | 21434794 | CSAR_peak_! | 12.59         | - |
| chr1 | 21434805 | 21434831 | CSAR_peak_! | 6.21          | - |
| chr1 | 21436757 | 21436847 | CSAR_peak_! | 17.37,17.82   | - |
| chr1 | 21436898 | 21436959 | CSAR_peak_! | 9.58          | - |
| chr1 | 21437711 | 21437762 | CSAR_peak_! | 8.13          | - |
| chr1 | 21437890 | 21437922 | CSAR_peak_! | 7.92          | - |
| chr1 | 21438136 | 21438240 | CSAR_peak_! | 29.4,13.48    | - |
| chr1 | 21438686 | 21438759 | CSAR_peak_! | 27.11,13.48   | - |
| chr1 | 21438850 | 21438937 | CSAR_peak_! | 16.05,8.39,9. | - |
| chr1 | 21439516 | 21439613 | CSAR_peak_! | 17.82,8.52    | - |
| chr1 | 21439663 | 21439717 | CSAR_peak_! | 9.55,8.39     | - |
| chr1 | 21439727 | 21439776 | CSAR_peak_! | 11.45,15.43   | - |
| chr1 | 21440350 | 21440432 | CSAR_peak_! | 25.91,17.4    | - |
| chr1 | 21440498 | 21440589 | CSAR_peak_! | 40.66,12.74   | - |
| chr1 | 21440693 | 21440745 | CSAR_peak_! | 24.21,38.71   | - |
| chr1 | 21440956 | 21441017 | CSAR_peak_! | 7.27,16.33    | - |
| chr1 | 21441157 | 21441207 | CSAR_peak_! | 12.13         | - |
| chr1 | 21441609 | 21441670 | CSAR_peak_! | 7.27,10.02    | - |
| chr1 | 21441716 | 21441927 | CSAR_peak_! | 8.39,29.19,4. | - |
| chr1 | 21441973 | 21442113 | CSAR_peak_! | 25.94,27.94   | - |
| chr1 | 21442120 | 21442154 | CSAR_peak_! | 6.21          | - |

|      |          |          |             |                |   |
|------|----------|----------|-------------|----------------|---|
| chr1 | 21442233 | 21442342 | CSAR_peak_! | 11.38,31.58    | - |
| chr1 | 21442388 | 21442464 | CSAR_peak_! | 14.88          | - |
| chr1 | 21442598 | 21442681 | CSAR_peak_! | 9.61,7.29      | - |
| chr1 | 21442757 | 21442911 | CSAR_peak_! | 35.83,22.73,-  | - |
| chr1 | 21459045 | 21459123 | CSAR_peak_! | 7.58,33.03     | - |
| chr1 | 21460167 | 21460218 | CSAR_peak_! | 7.27           | - |
| chr1 | 21464217 | 21464250 | CSAR_peak_! | 7.27           | - |
| chr1 | 21464801 | 21464902 | CSAR_peak_! | 10.83,12.13,-  | - |
| chr1 | 21465017 | 21465054 | CSAR_peak_! | 12.13          | - |
| chr1 | 21465111 | 21465147 | CSAR_peak_! | 7.27           | - |
| chr1 | 21465291 | 21465341 | CSAR_peak_! | 7.27           | - |
| chr1 | 21465546 | 21465587 | CSAR_peak_! | 9.58           | - |
| chr1 | 21467525 | 21467553 | CSAR_peak_! | 7.27           | - |
| chr1 | 21490875 | 21490902 | CSAR_peak_! | 7.27           | - |
| chr1 | 21491286 | 21491316 | CSAR_peak_! | 7.27           | - |
| chr1 | 21497683 | 21497722 | CSAR_peak_! | 6.21           | - |
| chr1 | 21499652 | 21499716 | CSAR_peak_! | 13.51          | - |
| chr1 | 21500778 | 21500829 | CSAR_peak_! | 7.27,12.13     | - |
| chr1 | 21500992 | 21501026 | CSAR_peak_! | 8.39           | - |
| chr1 | 21504527 | 21504569 | CSAR_peak_! | 7.27           | - |
| chr1 | 21504640 | 21504675 | CSAR_peak_! | 6.57           | - |
| chr1 | 21504841 | 21504902 | CSAR_peak_! | 16.33,8.39     | - |
| chr1 | 21504940 | 21504961 | CSAR_peak_! | 6.21,8.39      | - |
| chr1 | 21505008 | 21505122 | CSAR_peak_! | 20.43,7.27     | - |
| chr1 | 21505197 | 21505232 | CSAR_peak_! | 23.49          | - |
| chr1 | 21505281 | 21505324 | CSAR_peak_! | 9.72           | - |
| chr1 | 21505415 | 21505488 | CSAR_peak_! | 14.88          | - |
| chr1 | 21505686 | 21505741 | CSAR_peak_! | 19.36          | - |
| chr1 | 21506069 | 21506133 | CSAR_peak_! | 6.21           | - |
| chr1 | 21506375 | 21506457 | CSAR_peak_! | 13.66          | - |
| chr1 | 21513186 | 21513274 | CSAR_peak_! | 10.83,14.88    | - |
| chr1 | 21516509 | 21516570 | CSAR_peak_! | 20.94          | - |
| chr1 | 21537856 | 21537911 | CSAR_peak_! | 16.33,14.76    | - |
| chr1 | 21537997 | 21538136 | CSAR_peak_! | 7.27,13.48     | - |
| chr1 | 21538175 | 21538199 | CSAR_peak_! | 20.43          | - |
| chr1 | 21538280 | 21538338 | CSAR_peak_! | 12.35,15.28    | - |
| chr1 | 21538387 | 21538416 | CSAR_peak_! | 6.32           | - |
| chr1 | 21538483 | 21538641 | CSAR_peak_! | 8.92,8.53,8.7- | - |
| chr1 | 21538648 | 21538723 | CSAR_peak_! | 15.96,18.17    | - |
| chr1 | 21538791 | 21538910 | CSAR_peak_! | 17.82,10.31    | - |
| chr1 | 21539005 | 21539087 | CSAR_peak_! | 23.03,17.28    | - |
| chr1 | 21539169 | 21539320 | CSAR_peak_! | 26.43,22.19    | - |

|      |          |          |             |               |   |
|------|----------|----------|-------------|---------------|---|
| chr1 | 21539366 | 21539480 | CSAR_peak_! | 30.93,33.03   | - |
| chr1 | 21539554 | 21539654 | CSAR_peak_! | 28.29,18.65   | - |
| chr1 | 21539696 | 21539733 | CSAR_peak_! | 15.68,12.6    | - |
| chr1 | 21548338 | 21548487 | CSAR_peak_! | 21.94,25.91   | - |
| chr1 | 21548530 | 21548676 | CSAR_peak_! | 14.88,19.36   | - |
| chr1 | 21549550 | 21549625 | CSAR_peak_! | 9.58          | - |
| chr1 | 21549907 | 21549922 | CSAR_peak_! | 9.97          | - |
| chr1 | 21550028 | 21550136 | CSAR_peak_! | 23.65,13.37   | - |
| chr1 | 21550180 | 21550238 | CSAR_peak_! | 12.13         | - |
| chr1 | 21550305 | 21550338 | CSAR_peak_! | 7.27          | - |
| chr1 | 21550360 | 21550394 | CSAR_peak_! | 7.27          | - |
| chr1 | 21551112 | 21551162 | CSAR_peak_! | 6.03          | - |
| chr1 | 21551170 | 21551289 | CSAR_peak_! | 9.77,7.27,8.1 | - |
| chr1 | 21551491 | 21551501 | CSAR_peak_! | 7.27          | - |
| chr1 | 21551832 | 21551887 | CSAR_peak_! | 9.58          | - |
| chr1 | 21552019 | 21552066 | CSAR_peak_! | 9.58,8.09     | - |
| chr1 | 21552106 | 21552169 | CSAR_peak_! | 13.66         | - |
| chr1 | 21552266 | 21552326 | CSAR_peak_! | 18.73,12.74   | - |
| chr1 | 21552408 | 21552452 | CSAR_peak_! | 7.58,18.73    | - |
| chr1 | 21552493 | 21552539 | CSAR_peak_! | 10.83         | - |
| chr1 | 21552748 | 21552798 | CSAR_peak_! | 9.58          | - |
| chr1 | 21587674 | 21587778 | CSAR_peak_! | 12.13,13.48   | - |
| chr1 | 21588071 | 21588162 | CSAR_peak_! | 12.31         | - |
| chr1 | 21588335 | 21588379 | CSAR_peak_! | 9.58          | - |
| chr1 | 21588838 | 21588894 | CSAR_peak_! | 8.39          | - |
| chr1 | 21589315 | 21589327 | CSAR_peak_! | 6.03          | - |
| chr1 | 21589772 | 21589784 | CSAR_peak_! | 7.27          | - |
| chr1 | 21590141 | 21590203 | CSAR_peak_! | 6.95,9.58     | - |
| chr1 | 21590236 | 21590304 | CSAR_peak_! | 16.33         | - |
| chr1 | 21590747 | 21590825 | CSAR_peak_! | 19.36         | - |
| chr1 | 21590861 | 21590916 | CSAR_peak_! | 8.39,6.21     | - |
| chr1 | 21590967 | 21590994 | CSAR_peak_! | 9.58          | - |
| chr1 | 21592329 | 21592379 | CSAR_peak_! | 9.58,7.27     | - |
| chr1 | 21592977 | 21593017 | CSAR_peak_! | 6.21          | - |
| chr1 | 21593515 | 21593638 | CSAR_peak_! | 9.77,10.83    | - |
| chr1 | 21595151 | 21595200 | CSAR_peak_! | 7.92,8.14,6.4 | - |
| chr1 | 21596829 | 21596913 | CSAR_peak_! | 14.88,16.11   | - |
| chr1 | 21597543 | 21597591 | CSAR_peak_! | 7.58,5.86     | - |
| chr1 | 21598772 | 21598830 | CSAR_peak_! | 9.58,16.33    | - |
| chr1 | 21600246 | 21600313 | CSAR_peak_! | 8.39          | - |
| chr1 | 21600401 | 21600439 | CSAR_peak_! | 8.39          | - |
| chr1 | 21601088 | 21601115 | CSAR_peak_! | 6.21          | - |

|      |          |          |             |               |   |
|------|----------|----------|-------------|---------------|---|
| chr1 | 21612374 | 21612422 | CSAR_peak_! | 7.27          | - |
| chr1 | 21612535 | 21612601 | CSAR_peak_! | 10.95,16.05   | - |
| chr1 | 21612700 | 21612859 | CSAR_peak_! | 18.35,20.43,  | - |
| chr1 | 21612928 | 21612988 | CSAR_peak_! | 20.43,5.86,1  | - |
| chr1 | 21613080 | 21613150 | CSAR_peak_! | 18.65         | - |
| chr1 | 21613177 | 21613270 | CSAR_peak_! | 23.03,22.56   | - |
| chr1 | 21613392 | 21613428 | CSAR_peak_! | 7.27          | - |
| chr1 | 21613431 | 21613465 | CSAR_peak_! | 6.21          | - |
| chr1 | 21613469 | 21613530 | CSAR_peak_! | 12.13         | - |
| chr1 | 21613536 | 21613569 | CSAR_peak_! | 7.27          | - |
| chr1 | 21613678 | 21613856 | CSAR_peak_! | 40.66,12.74,  | - |
| chr1 | 21613881 | 21613907 | CSAR_peak_! | 6.42          | - |
| chr1 | 21614052 | 21614093 | CSAR_peak_! | 9.58          | - |
| chr1 | 21621014 | 21621030 | CSAR_peak_! | 7.58          | - |
| chr1 | 21621322 | 21621395 | CSAR_peak_! | 17.82,17.82   | - |
| chr1 | 21623864 | 21623920 | CSAR_peak_! | 13.48,10.02   | - |
| chr1 | 21624003 | 21624548 | CSAR_peak_! | 32.83,36.89   | - |
| chr1 | 21624611 | 21624735 | CSAR_peak_! | 10.02         | - |
| chr1 | 21624753 | 21625237 | CSAR_peak_! | 22.09,22.95,  | - |
| chr1 | 21625311 | 21625728 | CSAR_peak_! | 41.89,5.86,7. | - |
| chr1 | 21625787 | 21625851 | CSAR_peak_! | 11.38,35.24   | - |
| chr1 | 21626013 | 21626051 | CSAR_peak_! | 7.27          | - |
| chr1 | 21715949 | 21715972 | CSAR_peak_! | 17.82         | - |
| chr1 | 21716063 | 21716100 | CSAR_peak_! | 8.14,17.82    | - |
| chr1 | 21716144 | 21716195 | CSAR_peak_! | 9.77          | - |
| chr1 | 21717025 | 21717103 | CSAR_peak_! | 14.88         | - |
| chr1 | 21890067 | 21890169 | CSAR_peak_! | 9.58,12.13    | - |
| chr1 | 21890610 | 21890655 | CSAR_peak_! | 9.58          | - |
| chr1 | 21986922 | 21987001 | CSAR_peak_! | 6.57,7.27     | - |
| chr1 | 22020787 | 22020838 | CSAR_peak_! | 7.27          | - |
| chr1 | 22021057 | 22021124 | CSAR_peak_! | 12.13         | - |
| chr1 | 22021729 | 22021792 | CSAR_peak_! | 12.17         | - |
| chr1 | 22022299 | 22022342 | CSAR_peak_! | 7.27          | - |
| chr1 | 22053838 | 22053907 | CSAR_peak_! | 6.21          | - |
| chr1 | 22054151 | 22054227 | CSAR_peak_! | 9.58          | - |
| chr1 | 22054303 | 22054394 | CSAR_peak_! | 14.88,8.65    | - |
| chr1 | 22054404 | 22054545 | CSAR_peak_! | 19.36,14.88   | - |
| chr1 | 22054619 | 22054715 | CSAR_peak_! | 22.58,24.17   | - |
| chr1 | 22054726 | 22054861 | CSAR_peak_! | 26.69,31.48   | - |
| chr1 | 22054936 | 22054969 | CSAR_peak_! | 6.21          | - |
| chr1 | 22055047 | 22055098 | CSAR_peak_! | 7.27          | - |
| chr1 | 22055158 | 22055332 | CSAR_peak_! | 36.78,14.88   | - |



|      |          |          |             |                |   |
|------|----------|----------|-------------|----------------|---|
| chr1 | 22055396 | 22055488 | CSAR_peak_  | 23.49,50.34    | - |
| chr1 | 22055584 | 22055724 | CSAR_peak_! | 20.43,20.05    | - |
| chr1 | 22056678 | 22056755 | CSAR_peak_! | 7.27,7.27      | - |
| chr1 | 22056769 | 22056878 | CSAR_peak_! | 17.37,25.91    | - |
| chr1 | 22142811 | 22142860 | CSAR_peak_! | 12.13          | - |
| chr1 | 22143829 | 22143878 | CSAR_peak_! | 9.58           | - |
| chr1 | 22143976 | 22144038 | CSAR_peak_! | 9.58           | - |
| chr1 | 22144851 | 22144902 | CSAR_peak_! | 7.27           | - |
| chr1 | 22145601 | 22145664 | CSAR_peak_! | 20.94,16.19    | - |
| chr1 | 22145838 | 22145891 | CSAR_peak_! | 7.7            | - |
| chr1 | 22146656 | 22146706 | CSAR_peak_! | 8.39           | - |
| chr1 | 22177093 | 22177175 | CSAR_peak_! | 20.94,10.02    | - |
| chr1 | 22177198 | 22177263 | CSAR_peak_! | 10.95          | - |
| chr1 | 22177279 | 22177417 | CSAR_peak_! | 26.43,28.34    | - |
| chr1 | 22177488 | 22177631 | CSAR_peak_! | 39.21,30.21,(- | - |
| chr1 | 22177724 | 22177846 | CSAR_peak_! | 37.42,33.12    | - |
| chr1 | 22177855 | 22178016 | CSAR_peak_! | 14.88,16.92,(- | - |
| chr1 | 22178085 | 22178345 | CSAR_peak_! | 32.83,8.92,3(- | - |
| chr1 | 22178416 | 22178545 | CSAR_peak_! | 43.36,18.65    | - |
| chr1 | 22178547 | 22178611 | CSAR_peak_! | 9.58,16.11     | - |
| chr1 | 22178681 | 22178781 | CSAR_peak_! | 27.64,10.83    | - |
| chr1 | 22178828 | 22178975 | CSAR_peak_! | 11.66,12.13    | - |
| chr1 | 22179167 | 22179289 | CSAR_peak_! | 20.18,14.88    | - |
| chr1 | 22179667 | 22179795 | CSAR_peak_! | 16.08,30.81    | - |
| chr1 | 22179915 | 22180003 | CSAR_peak_! | 26.55,24.17    | - |
| chr1 | 22180098 | 22180166 | CSAR_peak_! | 12.13          | - |
| chr1 | 22180712 | 22180750 | CSAR_peak_! | 12.13          | - |
| chr1 | 22180757 | 22180798 | CSAR_peak_! | 6.21           | - |
| chr1 | 22188439 | 22188500 | CSAR_peak_! | 14.88,7.27     | - |
| chr1 | 22190220 | 22190287 | CSAR_peak_! | 14.88          | - |
| chr1 | 22190376 | 22190406 | CSAR_peak_! | 7.27           | - |
| chr1 | 22190516 | 22190563 | CSAR_peak_! | 8.39           | - |
| chr1 | 22190836 | 22190888 | CSAR_peak_! | 7.27           | - |
| chr1 | 22191335 | 22191367 | CSAR_peak_! | 9.58           | - |
| chr1 | 22201102 | 22201134 | CSAR_peak_! | 12.13,9.58     | - |
| chr1 | 22201245 | 22201294 | CSAR_peak_! | 25.91,15.2     | - |
| chr1 | 22201406 | 22201451 | CSAR_peak_! | 6.03           | - |
| chr1 | 22201468 | 22201554 | CSAR_peak_! | 10.94,7.27     | - |
| chr1 | 22201582 | 22201832 | CSAR_peak_! | 12.17,17.4,1(- | - |
| chr1 | 22201925 | 22202037 | CSAR_peak_! | 30.8,27.64     | - |
| chr1 | 22202081 | 22202564 | CSAR_peak_! | 12.31,19.45,(- | - |
| chr1 | 22202673 | 22202731 | CSAR_peak_! | 12.74,34.89    | - |

|      |          |          |             |                 |   |
|------|----------|----------|-------------|-----------------|---|
| chr1 | 22202782 | 22203070 | CSAR_peak_1 | 14.88,6.87,3.1  | - |
| chr1 | 22203212 | 22203260 | CSAR_peak_1 | 15,22.56        | - |
| chr1 | 22203493 | 22203582 | CSAR_peak_1 | 12.13           | - |
| chr1 | 22203669 | 22203823 | CSAR_peak_1 | 28.96,9.48,1.1  | - |
| chr1 | 22204252 | 22204365 | CSAR_peak_1 | 14.88,24.21     | - |
| chr1 | 22204514 | 22204552 | CSAR_peak_1 | 6.21            | - |
| chr1 | 22219002 | 22219079 | CSAR_peak_1 | 7.58            | - |
| chr1 | 22219219 | 22219270 | CSAR_peak_1 | 8.09            | - |
| chr1 | 22219568 | 22219623 | CSAR_peak_1 | 12.17,12.31     | - |
| chr1 | 22219679 | 22219744 | CSAR_peak_1 | 22.58,14.76     | - |
| chr1 | 22220376 | 22220487 | CSAR_peak_1 | 12.13           | - |
| chr1 | 22220539 | 22220591 | CSAR_peak_1 | 9.58,12.31      | - |
| chr1 | 22220620 | 22220677 | CSAR_peak_1 | 7.27            | - |
| chr1 | 22220788 | 22220879 | CSAR_peak_1 | 17.82           | - |
| chr1 | 22221134 | 22221165 | CSAR_peak_1 | 8.14            | - |
| chr1 | 22221259 | 22221296 | CSAR_peak_1 | 10.02           | - |
| chr1 | 22222097 | 22222137 | CSAR_peak_1 | 7.27            | - |
| chr1 | 22222645 | 22222744 | CSAR_peak_1 | 9.58,9.58       | - |
| chr1 | 22223183 | 22223278 | CSAR_peak_1 | 10.83           | - |
| chr1 | 22223385 | 22223435 | CSAR_peak_1 | 9.58            | - |
| chr1 | 22267625 | 22267665 | CSAR_peak_1 | 8.2             | - |
| chr1 | 22267772 | 22267808 | CSAR_peak_1 | 6.21            | - |
| chr1 | 22286529 | 22286573 | CSAR_peak_1 | 6.21            | - |
| chr1 | 22286800 | 22286849 | CSAR_peak_1 | 8.65            | - |
| chr1 | 22288848 | 22288943 | CSAR_peak_1 | 12.31,9.77      | - |
| chr1 | 22306337 | 22306397 | CSAR_peak_1 | 12.13,8.95      | - |
| chr1 | 22306506 | 22306602 | CSAR_peak_1 | 9.77,10.83,7.1  | - |
| chr1 | 22306840 | 22306887 | CSAR_peak_1 | 6.21,8.39       | - |
| chr1 | 22313322 | 22313414 | CSAR_peak_1 | 22.78,80.89,1.1 | - |
| chr1 | 22328376 | 22328439 | CSAR_peak_1 | 9.58            | - |
| chr1 | 22329161 | 22329210 | CSAR_peak_1 | 8.65            | - |
| chr1 | 22348433 | 22348485 | CSAR_peak_1 | 7.58            | - |
| chr1 | 22355214 | 22355264 | CSAR_peak_1 | 8.39            | - |
| chr1 | 22355297 | 22355412 | CSAR_peak_1 | 7.92            | - |
| chr1 | 22355475 | 22355594 | CSAR_peak_1 | 20.13,24.21     | - |
| chr1 | 22355689 | 22355735 | CSAR_peak_1 | 19.36,9.97      | - |
| chr1 | 22355739 | 22355792 | CSAR_peak_1 | 12.31,7.58      | - |
| chr1 | 22355796 | 22355862 | CSAR_peak_1 | 7.92            | - |
| chr1 | 22356129 | 22356273 | CSAR_peak_1 | 5.86,7.27,11.1  | - |
| chr1 | 22356406 | 22356458 | CSAR_peak_1 | 8.39,12.13      | - |
| chr1 | 22358758 | 22358807 | CSAR_peak_1 | 13.48,5.86      | - |
| chr1 | 22369693 | 22369744 | CSAR_peak_1 | 7.27            | - |

|      |          |          |             |                   |   |
|------|----------|----------|-------------|-------------------|---|
| chr1 | 22369753 | 22369865 | CSAR_peak_1 | 31.2,12.17        | - |
| chr1 | 22369947 | 22370017 | CSAR_peak_1 | 12.74             | - |
| chr1 | 22370103 | 22370153 | CSAR_peak_1 | 8.14              | - |
| chr1 | 22370366 | 22370482 | CSAR_peak_1 | 13.09,13.85,13.85 | - |
| chr1 | 22370591 | 22370651 | CSAR_peak_1 | 14.88,10.83       | - |
| chr1 | 22370777 | 22370825 | CSAR_peak_1 | 6.21              | - |
| chr1 | 22371084 | 22371130 | CSAR_peak_1 | 9.58              | - |
| chr1 | 22371664 | 22371714 | CSAR_peak_1 | 6.21              | - |
| chr1 | 22386321 | 22386395 | CSAR_peak_1 | 10.95             | - |
| chr1 | 22394544 | 22394637 | CSAR_peak_1 | 234.13,77.53      | - |
| chr1 | 22395113 | 22395196 | CSAR_peak_1 | 7.34              | - |
| chr1 | 22397501 | 22397590 | CSAR_peak_1 | 22.65,6.14,11.14  | - |
| chr1 | 22402330 | 22402391 | CSAR_peak_1 | 9.58              | - |
| chr1 | 22439412 | 22439483 | CSAR_peak_1 | 6.81              | - |
| chr1 | 22439497 | 22439586 | CSAR_peak_1 | 8.14              | - |
| chr1 | 22439610 | 22439700 | CSAR_peak_1 | 9.58,7.27         | - |
| chr1 | 22439878 | 22439919 | CSAR_peak_1 | 9.77,13.44        | - |
| chr1 | 22439998 | 22440005 | CSAR_peak_1 | 6.03              | - |
| chr1 | 22440606 | 22440678 | CSAR_peak_1 | 7.58,17.82        | - |
| chr1 | 22440835 | 22440928 | CSAR_peak_1 | 8.39,19.36,19.36  | - |
| chr1 | 22441029 | 22441044 | CSAR_peak_1 | 7.27              | - |
| chr1 | 22441047 | 22441169 | CSAR_peak_1 | 12.13,6.21        | - |
| chr1 | 22441303 | 22441359 | CSAR_peak_1 | 14.76             | - |
| chr1 | 22441563 | 22441617 | CSAR_peak_1 | 11.71             | - |
| chr1 | 22441777 | 22441832 | CSAR_peak_1 | 25.91,6.45        | - |
| chr1 | 22441836 | 22441911 | CSAR_peak_1 | 21,8.44           | - |
| chr1 | 22462253 | 22462342 | CSAR_peak_1 | 6.21              | - |
| chr1 | 22462701 | 22462776 | CSAR_peak_1 | 10.95             | - |
| chr1 | 22462821 | 22462884 | CSAR_peak_1 | 9.58,9.58         | - |
| chr1 | 22463068 | 22463165 | CSAR_peak_1 | 12.13,10.83       | - |
| chr1 | 22463283 | 22463354 | CSAR_peak_1 | 16.33             | - |
| chr1 | 22463920 | 22463975 | CSAR_peak_1 | 7.27              | - |
| chr1 | 22464112 | 22464175 | CSAR_peak_1 | 7.58              | - |
| chr1 | 22464916 | 22464954 | CSAR_peak_1 | 7.92,5.86         | - |
| chr1 | 22466729 | 22466793 | CSAR_peak_1 | 7.27              | - |
| chr1 | 22471524 | 22471591 | CSAR_peak_1 | 8.39              | - |
| chr1 | 22473086 | 22473134 | CSAR_peak_1 | 9.77,6.21         | - |
| chr1 | 22508805 | 22508849 | CSAR_peak_1 | 7.27              | - |
| chr1 | 22508960 | 22508993 | CSAR_peak_1 | 7.73              | - |
| chr1 | 22509062 | 22509285 | CSAR_peak_1 | 6.64,21.22,7.27   | - |
| chr1 | 22509559 | 22509595 | CSAR_peak_1 | 7.27,13.48        | - |
| chr1 | 22509642 | 22509794 | CSAR_peak_1 | 16.77,16.54       | - |

|      |          |          |             |               |
|------|----------|----------|-------------|---------------|
| chr1 | 22509965 | 22510113 | CSAR_peak_! | 14.88,18.73,- |
| chr1 | 22510152 | 22510189 | CSAR_peak_! | 6.21 -        |
| chr1 | 22510197 | 22510232 | CSAR_peak_! | 6.21 -        |
| chr1 | 22510698 | 22510752 | CSAR_peak_! | 9.58,8.13 -   |
| chr1 | 22510754 | 22510807 | CSAR_peak_! | 10.18,9.58 -  |
| chr1 | 22510914 | 22510952 | CSAR_peak_! | 10.83,10.95 - |
| chr1 | 22511169 | 22511172 | CSAR_peak_! | 6.21 -        |
| chr1 | 22511311 | 22511360 | CSAR_peak_! | 14.76,7.92 -  |
| chr1 | 22511486 | 22511586 | CSAR_peak_! | 42.64 -       |
| chr1 | 22511789 | 22511806 | CSAR_peak_! | 17.82 -       |
| chr1 | 22535123 | 22535165 | CSAR_peak_! | 9.58,7.58 -   |
| chr1 | 22535243 | 22535420 | CSAR_peak_! | 13.48,16.33,- |
| chr1 | 22535559 | 22535609 | CSAR_peak_! | 6.21 -        |
| chr1 | 22536371 | 22536415 | CSAR_peak_! | 7.27 -        |
| chr1 | 22537317 | 22537341 | CSAR_peak_! | 10.83 -       |
| chr1 | 22537662 | 22537775 | CSAR_peak_! | 8.65,27.64 -  |
| chr1 | 22537902 | 22538057 | CSAR_peak_! | 14.88,12.13,- |
| chr1 | 22538081 | 22538153 | CSAR_peak_! | 13.48,7.58 -  |
| chr1 | 22539336 | 22539442 | CSAR_peak_! | 9.77 -        |
| chr1 | 22540000 | 22540041 | CSAR_peak_! | 10.83 -       |
| chr1 | 22540148 | 22540211 | CSAR_peak_! | 7.27,9.58 -   |
| chr1 | 22540464 | 22540588 | CSAR_peak_! | 9.58,13.51 -  |
| chr1 | 22638539 | 22638590 | CSAR_peak_! | 7.27 -        |
| chr1 | 22638983 | 22639058 | CSAR_peak_! | 7.58 -        |
| chr1 | 22639932 | 22639972 | CSAR_peak_! | 6.21 -        |
| chr1 | 22640171 | 22640222 | CSAR_peak_! | 6.03 -        |
| chr1 | 22641492 | 22641547 | CSAR_peak_! | 10.95 -       |
| chr1 | 22641932 | 22641981 | CSAR_peak_! | 7.27 -        |
| chr1 | 22642279 | 22642333 | CSAR_peak_! | 14.88,7.27 -  |
| chr1 | 22642378 | 22642418 | CSAR_peak_! | 6.21 -        |
| chr1 | 22642725 | 22642816 | CSAR_peak_! | 12.13 -       |
| chr1 | 22643361 | 22643405 | CSAR_peak_! | 6.21 -        |
| chr1 | 22643854 | 22643908 | CSAR_peak_! | 12.13,8.39 -  |
| chr1 | 22643913 | 22643970 | CSAR_peak_! | 7.27 -        |
| chr1 | 22644176 | 22644218 | CSAR_peak_! | 7.27 -        |
| chr1 | 22644918 | 22644977 | CSAR_peak_! | 6.21 -        |
| chr1 | 22645854 | 22645939 | CSAR_peak_! | 8.65,17.82 -  |
| chr1 | 22646482 | 22646583 | CSAR_peak_! | 7.27 -        |
| chr1 | 22646689 | 22646746 | CSAR_peak_! | 7.27,7.27 -   |
| chr1 | 22646774 | 22646831 | CSAR_peak_! | 14.88 -       |
| chr1 | 22646925 | 22646998 | CSAR_peak_! | 19.36,9.77 -  |
| chr1 | 22647117 | 22647163 | CSAR_peak_! | 12.13 -       |

|      |          |          |             |               |   |
|------|----------|----------|-------------|---------------|---|
| chr1 | 22647294 | 22647343 | CSAR_peak_! | 12.13,5.86    | - |
| chr1 | 22647614 | 22647699 | CSAR_peak_! | 24.17,8.39    | - |
| chr1 | 22647983 | 22648029 | CSAR_peak_! | 17.82         | - |
| chr1 | 22648444 | 22648506 | CSAR_peak_! | 6.21          | - |
| chr1 | 22668165 | 22668214 | CSAR_peak_! | 6.21          | - |
| chr1 | 22705521 | 22705559 | CSAR_peak_! | 7.27          | - |
| chr1 | 22708524 | 22708578 | CSAR_peak_! | 7.27          | - |
| chr1 | 22710005 | 22710061 | CSAR_peak_! | 9.77          | - |
| chr1 | 22710429 | 22710462 | CSAR_peak_! | 7.27          | - |
| chr1 | 22744839 | 22744962 | CSAR_peak_! | 31.2,19.36    | - |
| chr1 | 22745022 | 22745128 | CSAR_peak_! | 13.48,17.82   | - |
| chr1 | 22745365 | 22745415 | CSAR_peak_! | 6.21          | - |
| chr1 | 22745555 | 22745558 | CSAR_peak_! | 6.21          | - |
| chr1 | 22745629 | 22745717 | CSAR_peak_! | 12.27         | - |
| chr1 | 22745728 | 22745811 | CSAR_peak_! | 6.95,12.13    | - |
| chr1 | 22746075 | 22746134 | CSAR_peak_! | 24.21         | - |
| chr1 | 22746142 | 22746243 | CSAR_peak_! | 20.94,14.88   | - |
| chr1 | 22746616 | 22747038 | CSAR_peak_! | 39.92,52.17,! | - |
| chr1 | 22747053 | 22747340 | CSAR_peak_! | 31.2,42.31,1! | - |
| chr1 | 22747353 | 22747668 | CSAR_peak_! | 60.66,80.98,! | - |
| chr1 | 22747680 | 22748213 | CSAR_peak_! | 52.41,67.4    | - |
| chr1 | 22748227 | 22748377 | CSAR_peak_! | 36.8,37.55    | - |
| chr1 | 22748409 | 22749351 | CSAR_peak_! | 49.04,11.38,! | - |
| chr1 | 22749404 | 22749578 | CSAR_peak_! | 47.41,43.28   | - |
| chr1 | 22749611 | 22749664 | CSAR_peak_! | 13.48         | - |
| chr1 | 22749677 | 22749750 | CSAR_peak_! | 12.13,14.88   | - |
| chr1 | 22749756 | 22749809 | CSAR_peak_! | 14.88         | - |
| chr1 | 22749843 | 22749893 | CSAR_peak_! | 7.58          | - |
| chr1 | 22749921 | 22750001 | CSAR_peak_! | 15.1,19.21    | - |
| chr1 | 22754158 | 22754248 | CSAR_peak_! | 9.58          | - |
| chr1 | 22754342 | 22754563 | CSAR_peak_! | 21.94,49.7    | - |
| chr1 | 22754621 | 22754675 | CSAR_peak_! | 19.36,22.56   | - |
| chr1 | 22754769 | 22754821 | CSAR_peak_! | 9.77,14.88    | - |
| chr1 | 22754974 | 22755063 | CSAR_peak_! | 16.23,22.58   | - |
| chr1 | 22755116 | 22755237 | CSAR_peak_! | 41.46,6.81,2! | - |
| chr1 | 22755296 | 22755518 | CSAR_peak_! | 7.78,32.86,2! | - |
| chr1 | 22755545 | 22755605 | CSAR_peak_! | 12.13,13.44   | - |
| chr1 | 22755653 | 22755743 | CSAR_peak_! | 12.17         | - |
| chr1 | 22755849 | 22756019 | CSAR_peak_! | 10.02,19.25,! | - |
| chr1 | 22756145 | 22756174 | CSAR_peak_! | 6.44          | - |
| chr1 | 22793743 | 22793823 | CSAR_peak_! | 14.76,8.65    | - |
| chr1 | 22798052 | 22798099 | CSAR_peak_! | 12.13         | - |

|      |          |          |             |                   |   |
|------|----------|----------|-------------|-------------------|---|
| chr1 | 22798396 | 22798493 | CSAR_peak_1 | 19.93,8.92        | - |
| chr1 | 22798497 | 22798575 | CSAR_peak_1 | 25.48,21.59       | - |
| chr1 | 22798607 | 22798674 | CSAR_peak_1 | 6.21              | - |
| chr1 | 22798675 | 22798797 | CSAR_peak_1 | 5.86,17.51,17.51  | - |
| chr1 | 22798832 | 22799080 | CSAR_peak_1 | 78.03,5.91,7.27   | - |
| chr1 | 22799113 | 22799193 | CSAR_peak_1 | 17.4,22.52        | - |
| chr1 | 22799449 | 22799489 | CSAR_peak_1 | 6.21              | - |
| chr1 | 22799504 | 22799572 | CSAR_peak_1 | 18.1,19.98        | - |
| chr1 | 22799639 | 22799716 | CSAR_peak_1 | 7.27              | - |
| chr1 | 22799792 | 22799886 | CSAR_peak_1 | 33.47,44.69       | - |
| chr1 | 22799901 | 22799966 | CSAR_peak_1 | 7.27,7.27         | - |
| chr1 | 22800081 | 22800205 | CSAR_peak_1 | 17.82,10.02       | - |
| chr1 | 22800246 | 22800610 | CSAR_peak_1 | 16.33,13.48,13.48 | - |
| chr1 | 22800630 | 22800731 | CSAR_peak_1 | 29.2,8.95         | - |
| chr1 | 22800742 | 22800798 | CSAR_peak_1 | 16.33,8.65        | - |
| chr1 | 22867803 | 22867941 | CSAR_peak_1 | 17.82,9.55,29.2   | - |
| chr1 | 22867984 | 22868017 | CSAR_peak_1 | 6.21              | - |
| chr1 | 22868094 | 22868118 | CSAR_peak_1 | 9.41              | - |
| chr1 | 22868134 | 22868260 | CSAR_peak_1 | 57.21,14.73,14.73 | - |
| chr1 | 22868303 | 22868378 | CSAR_peak_1 | 34.74,41.68       | - |
| chr1 | 22868384 | 22868473 | CSAR_peak_1 | 6.51,27.77,5.86   | - |
| chr1 | 22868514 | 22868760 | CSAR_peak_1 | 18.6,42.64,29.2   | - |
| chr1 | 22868779 | 22868981 | CSAR_peak_1 | 26.64,17.84       | - |
| chr1 | 22869028 | 22869179 | CSAR_peak_1 | 35.57,23.95,23.95 | - |
| chr1 | 22869182 | 22869269 | CSAR_peak_1 | 19.36,26.69       | - |
| chr1 | 22869386 | 22869454 | CSAR_peak_1 | 33.47,19.36       | - |
| chr1 | 22869560 | 22869667 | CSAR_peak_1 | 33.47,20.05       | - |
| chr1 | 22869716 | 22869853 | CSAR_peak_1 | 45.02,50.28       | - |
| chr1 | 22869900 | 22870125 | CSAR_peak_1 | 40.49,23.89,23.89 | - |
| chr1 | 22870137 | 22870201 | CSAR_peak_1 | 10.17             | - |
| chr1 | 22870235 | 22870400 | CSAR_peak_1 | 29.04,29.61       | - |
| chr1 | 22870444 | 22870610 | CSAR_peak_1 | 18.95,21.6,9.41   | - |
| chr1 | 22870636 | 22870710 | CSAR_peak_1 | 33.47,38.71       | - |
| chr1 | 22870834 | 22871008 | CSAR_peak_1 | 62.52,39.2        | - |
| chr1 | 22871068 | 22871143 | CSAR_peak_1 | 25.18,16.36       | - |
| chr1 | 22871144 | 22871181 | CSAR_peak_1 | 7.27              | - |
| chr1 | 22882890 | 22882959 | CSAR_peak_1 | 9.58              | - |
| chr1 | 22883234 | 22883273 | CSAR_peak_1 | 7.27              | - |
| chr1 | 22995814 | 22995891 | CSAR_peak_1 | 8.39              | - |
| chr1 | 22995902 | 22995964 | CSAR_peak_1 | 17.82             | - |
| chr1 | 23017956 | 23017999 | CSAR_peak_1 | 8.39              | - |
| chr1 | 23018118 | 23018153 | CSAR_peak_1 | 6.57              | - |

|      |          |          |             |               |   |
|------|----------|----------|-------------|---------------|---|
| chr1 | 23018242 | 23018259 | CSAR_peak_! | 7.27          | - |
| chr1 | 23018503 | 23018558 | CSAR_peak_! | 8.28          | - |
| chr1 | 23018572 | 23018585 | CSAR_peak_! | 7.27          | - |
| chr1 | 23018779 | 23018864 | CSAR_peak_! | 7,20.43,7.27  | - |
| chr1 | 23018884 | 23018933 | CSAR_peak_! | 6.21          | - |
| chr1 | 23027367 | 23027422 | CSAR_peak_! | 6.03,7.34     | - |
| chr1 | 23035129 | 23035214 | CSAR_peak_! | 9.58          | - |
| chr1 | 23036084 | 23036146 | CSAR_peak_! | 7.27,7.27     | - |
| chr1 | 23036267 | 23036367 | CSAR_peak_! | 9.58,6.21,17. | - |
| chr1 | 23036425 | 23036468 | CSAR_peak_! | 7.27,18.73    | - |
| chr1 | 23036639 | 23036788 | CSAR_peak_! | 16.33,7.58    | - |
| chr1 | 23037183 | 23037242 | CSAR_peak_! | 9.58          | - |
| chr1 | 23037331 | 23037381 | CSAR_peak_! | 8.39          | - |
| chr1 | 23038059 | 23038123 | CSAR_peak_! | 9.58,9.58     | - |
| chr1 | 23038194 | 23038233 | CSAR_peak_! | 8.39          | - |
| chr1 | 23038669 | 23038724 | CSAR_peak_! | 7.27          | - |
| chr1 | 23038805 | 23038860 | CSAR_peak_! | 11.66,7.26    | - |
| chr1 | 23038883 | 23038952 | CSAR_peak_! | 13.48,10.02   | - |
| chr1 | 23038957 | 23039189 | CSAR_peak_! | 19.45,16.33,; | - |
| chr1 | 23041792 | 23041845 | CSAR_peak_! | 7.27          | - |
| chr1 | 23043271 | 23043364 | CSAR_peak_! | 12.13,8.39    | - |
| chr1 | 23043542 | 23043604 | CSAR_peak_! | 10.83         | - |
| chr1 | 23043663 | 23043704 | CSAR_peak_! | 7.27          | - |
| chr1 | 23043719 | 23043769 | CSAR_peak_! | 8.39          | - |
| chr1 | 23106287 | 23106350 | CSAR_peak_! | 7,6.21        | - |
| chr1 | 23106680 | 23106754 | CSAR_peak_! | 12.13,27.64   | - |
| chr1 | 23107180 | 23107248 | CSAR_peak_! | 6.21          | - |
| chr1 | 23108005 | 23108103 | CSAR_peak_! | 24.21,13.29   | - |
| chr1 | 23108157 | 23108211 | CSAR_peak_! | 6.21          | - |
| chr1 | 23108541 | 23108577 | CSAR_peak_! | 6.21          | - |
| chr1 | 23108643 | 23108735 | CSAR_peak_! | 10.83,7.27    | - |
| chr1 | 23108754 | 23108790 | CSAR_peak_! | 10.94,7.06    | - |
| chr1 | 23108845 | 23108925 | CSAR_peak_! | 35.7,30.02    | - |
| chr1 | 23205592 | 23205642 | CSAR_peak_! | 14.88         | - |
| chr1 | 23234127 | 23234229 | CSAR_peak_! | 14.88,16.33   | - |
| chr1 | 23234462 | 23234499 | CSAR_peak_! | 10.83         | - |
| chr1 | 23234986 | 23235065 | CSAR_peak_! | 6.21          | - |
| chr1 | 23235147 | 23235371 | CSAR_peak_! | 7.27,19.36,1; | - |
| chr1 | 23254700 | 23254779 | CSAR_peak_! | 18.73,7.27    | - |
| chr1 | 23254965 | 23255022 | CSAR_peak_! | 6.85,14.88    | - |
| chr1 | 23255115 | 23255154 | CSAR_peak_! | 9.58          | - |
| chr1 | 23255176 | 23255227 | CSAR_peak_! | 12.13         | - |

|      |          |          |             |                |   |
|------|----------|----------|-------------|----------------|---|
| chr1 | 23255570 | 23255610 | CSAR_peak_! | 9.58           | - |
| chr1 | 23255824 | 23255921 | CSAR_peak_! | 13.51,33.03    | - |
| chr1 | 23256115 | 23256187 | CSAR_peak_! | 30.02,10.02,(- |   |
| chr1 | 23256437 | 23256536 | CSAR_peak_! | 9.79,8.12      | - |
| chr1 | 23256618 | 23256706 | CSAR_peak_! | 7.26,16.11,7.- |   |
| chr1 | 23256777 | 23256827 | CSAR_peak_! | 7.27           | - |
| chr1 | 23256953 | 23256998 | CSAR_peak_! | 8.28           | - |
| chr1 | 23257001 | 23257015 | CSAR_peak_! | 7.27           | - |
| chr1 | 23257136 | 23257187 | CSAR_peak_! | 8.09,10.13,7.- |   |
| chr1 | 23257950 | 23258010 | CSAR_peak_! | 7.27           | - |
| chr1 | 23259164 | 23259232 | CSAR_peak_! | 6.94,6.52      | - |
| chr1 | 23259302 | 23259350 | CSAR_peak_! | 7.58,9.77      | - |
| chr1 | 23348113 | 23348183 | CSAR_peak_! | 7.27           | - |
| chr1 | 23348288 | 23348339 | CSAR_peak_! | 6.21           | - |
| chr1 | 23348508 | 23348550 | CSAR_peak_! | 11.66          | - |
| chr1 | 23349089 | 23349163 | CSAR_peak_! | 13.48,8.14,7.- |   |
| chr1 | 23349332 | 23349404 | CSAR_peak_! | 10.83          | - |
| chr1 | 23350268 | 23350333 | CSAR_peak_! | 9.58           | - |
| chr1 | 23350370 | 23350424 | CSAR_peak_! | 17.82          | - |
| chr1 | 23350974 | 23351035 | CSAR_peak_! | 9.61           | - |
| chr1 | 23351910 | 23351969 | CSAR_peak_! | 5.86,8.39      | - |
| chr1 | 23367524 | 23367592 | CSAR_peak_! | 8.65,7.27      | - |
| chr1 | 23367607 | 23367695 | CSAR_peak_! | 15.2,20.12     | - |
| chr1 | 23367712 | 23367799 | CSAR_peak_! | 20.18,16.11    | - |
| chr1 | 23367952 | 23368031 | CSAR_peak_! | 7.58,12.17     | - |
| chr1 | 23368060 | 23368085 | CSAR_peak_! | 15.56          | - |
| chr1 | 23368123 | 23368191 | CSAR_peak_! | 12.17,20.43    | - |
| chr1 | 23368343 | 23368366 | CSAR_peak_! | 9.58           | - |
| chr1 | 23385516 | 23385584 | CSAR_peak_! | 12.13          | - |
| chr1 | 23385683 | 23385705 | CSAR_peak_! | 7.58           | - |
| chr1 | 23385743 | 23385814 | CSAR_peak_! | 10.83          | - |
| chr1 | 23386424 | 23386565 | CSAR_peak_! | 6.21,7.27      | - |
| chr1 | 23386648 | 23386715 | CSAR_peak_! | 8.65           | - |
| chr1 | 23386960 | 23387086 | CSAR_peak_! | 13.48,13.44,(- |   |
| chr1 | 23387107 | 23387294 | CSAR_peak_! | 19.36,12.17,(- |   |
| chr1 | 23387846 | 23387882 | CSAR_peak_! | 9.58           | - |
| chr1 | 23387990 | 23388074 | CSAR_peak_! | 25.62,7.58     | - |
| chr1 | 23388573 | 23388622 | CSAR_peak_! | 7.27           | - |
| chr1 | 23388756 | 23388833 | CSAR_peak_! | 10.83,7.27     | - |
| chr1 | 23388872 | 23388996 | CSAR_peak_! | 17.87,14.85,(- |   |
| chr1 | 23389049 | 23389197 | CSAR_peak_! | 12.13,6.21     | - |
| chr1 | 23389262 | 23389371 | CSAR_peak_! | 18.95,24.21    | - |



|      |          |          |             |               |   |
|------|----------|----------|-------------|---------------|---|
| chr1 | 23389411 | 23389461 | CSAR_peak_! | 6.21          | - |
| chr1 | 23389489 | 23389574 | CSAR_peak_! | 16.11,16.33   | - |
| chr1 | 23389582 | 23389783 | CSAR_peak_! | 21.35,19.36,: | - |
| chr1 | 23390015 | 23390156 | CSAR_peak_! | 6.21,7.27     | - |
| chr1 | 23390243 | 23390306 | CSAR_peak_! | 8.65          | - |
| chr1 | 23390325 | 23390367 | CSAR_peak_! | 7.27          | - |
| chr1 | 23390557 | 23390656 | CSAR_peak_! | 9.58,12.13    | - |
| chr1 | 23390689 | 23390780 | CSAR_peak_! | 9.58,7.27,8.6 | - |
| chr1 | 23390873 | 23391213 | CSAR_peak_! | 10.83,14.92,: | - |
| chr1 | 23391233 | 23391496 | CSAR_peak_! | 46.53,30.8,8. | - |
| chr1 | 23391552 | 23391613 | CSAR_peak_! | 7.27          | - |
| chr1 | 23391661 | 23391726 | CSAR_peak_! | 18.95,8.28    | - |
| chr1 | 23391879 | 23391941 | CSAR_peak_! | 13.48,6.21    | - |
| chr1 | 23391954 | 23392228 | CSAR_peak_! | 21.53,55.05   | - |
| chr1 | 23392256 | 23392322 | CSAR_peak_! | 6.21,26.05,2! | - |
| chr1 | 23392327 | 23392382 | CSAR_peak_! | 20.43         | - |
| chr1 | 23392445 | 23392591 | CSAR_peak_! | 13.44,24.97,: | - |
| chr1 | 23427600 | 23427644 | CSAR_peak_! | 7.27          | - |
| chr1 | 23427714 | 23427744 | CSAR_peak_! | 8.39          | - |
| chr1 | 23428089 | 23428130 | CSAR_peak_! | 6.21          | - |
| chr1 | 23428266 | 23428337 | CSAR_peak_! | 6.21          | - |
| chr1 | 23428369 | 23428485 | CSAR_peak_! | 9.77,10.31    | - |
| chr1 | 23428596 | 23428671 | CSAR_peak_! | 7.58,7.92     | - |
| chr1 | 23428857 | 23428909 | CSAR_peak_! | 8.39          | - |
| chr1 | 23429004 | 23429063 | CSAR_peak_! | 12.13         | - |
| chr1 | 23456948 | 23456999 | CSAR_peak_! | 7.27          | - |
| chr1 | 23457307 | 23457357 | CSAR_peak_! | 7.27          | - |
| chr1 | 23466977 | 23467015 | CSAR_peak_! | 8.39          | - |
| chr1 | 23468342 | 23468391 | CSAR_peak_! | 6.21,8.39     | - |
| chr1 | 23472325 | 23472373 | CSAR_peak_! | 12.13         | - |
| chr1 | 23472452 | 23472488 | CSAR_peak_! | 7.27          | - |
| chr1 | 23472628 | 23472718 | CSAR_peak_! | 9.27,14.88    | - |
| chr1 | 23473471 | 23473547 | CSAR_peak_! | 7.58,7.58     | - |
| chr1 | 23488905 | 23488953 | CSAR_peak_! | 5.86,9.58     | - |
| chr1 | 23495028 | 23495071 | CSAR_peak_! | 7.27          | - |
| chr1 | 23495657 | 23495694 | CSAR_peak_! | 6.21          | - |
| chr1 | 23496064 | 23496109 | CSAR_peak_! | 9.58          | - |
| chr1 | 23496280 | 23496382 | CSAR_peak_! | 10.83,8.39    | - |
| chr1 | 23496960 | 23497054 | CSAR_peak_! | 10.83         | - |
| chr1 | 23497069 | 23497147 | CSAR_peak_! | 6.81          | - |
| chr1 | 23497425 | 23497501 | CSAR_peak_! | 9.77          | - |
| chr1 | 23500531 | 23500621 | CSAR_peak_! | 7.58          | - |

|      |          |          |             |                |   |
|------|----------|----------|-------------|----------------|---|
| chr1 | 23500682 | 23500731 | CSAR_peak_! | 7.27           | - |
| chr1 | 23500851 | 23500926 | CSAR_peak_! | 9.58           | - |
| chr1 | 23501437 | 23501491 | CSAR_peak_! | 7.27           | - |
| chr1 | 23501504 | 23501582 | CSAR_peak_! | 14.88          | - |
| chr1 | 23501970 | 23502032 | CSAR_peak_! | 6.21           | - |
| chr1 | 23545015 | 23545071 | CSAR_peak_! | 12.13          | - |
| chr1 | 23545828 | 23545895 | CSAR_peak_! | 17.37          | - |
| chr1 | 23546385 | 23546428 | CSAR_peak_! | 7.27           | - |
| chr1 | 23546957 | 23547021 | CSAR_peak_! | 13.48          | - |
| chr1 | 23549204 | 23549282 | CSAR_peak_! | 12.13          | - |
| chr1 | 23549762 | 23549818 | CSAR_peak_! | 6.21           | - |
| chr1 | 23608411 | 23608461 | CSAR_peak_! | 7.27           | - |
| chr1 | 23609812 | 23609860 | CSAR_peak_! | 7.27           | - |
| chr1 | 23625069 | 23625168 | CSAR_peak_! | 13.48,6.21     | - |
| chr1 | 23625453 | 23625507 | CSAR_peak_! | 6.95           | - |
| chr1 | 23625796 | 23625851 | CSAR_peak_! | 8.65           | - |
| chr1 | 23625871 | 23625901 | CSAR_peak_! | 8.65,7.73      | - |
| chr1 | 23625960 | 23626052 | CSAR_peak_! | 24.17          | - |
| chr1 | 23626295 | 23626391 | CSAR_peak_! | 12.17          | - |
| chr1 | 23626677 | 23626790 | CSAR_peak_! | 13.51,16.33    | - |
| chr1 | 23626921 | 23627012 | CSAR_peak_! | 9.58,7.27      | - |
| chr1 | 23627124 | 23627187 | CSAR_peak_! | 12.13,10.83    | - |
| chr1 | 23627296 | 23627332 | CSAR_peak_! | 7.27           | - |
| chr1 | 23627676 | 23627722 | CSAR_peak_! | 10.31,17.82    | - |
| chr1 | 23628496 | 23628564 | CSAR_peak_! | 17.52,33.03    | - |
| chr1 | 23628697 | 23628747 | CSAR_peak_! | 9.58           | - |
| chr1 | 23629002 | 23629126 | CSAR_peak_! | 17.82,10.02,,- | - |
| chr1 | 23629512 | 23629557 | CSAR_peak_! | 8.39           | - |
| chr1 | 23657811 | 23657872 | CSAR_peak_! | 9.77           | - |
| chr1 | 23658038 | 23658081 | CSAR_peak_! | 13.48          | - |
| chr1 | 23658216 | 23658282 | CSAR_peak_! | 8.65,12.13     | - |
| chr1 | 23658427 | 23658485 | CSAR_peak_! | 14.88,10.83    | - |
| chr1 | 23658707 | 23658773 | CSAR_peak_! | 10.94,6.44     | - |
| chr1 | 23658927 | 23658961 | CSAR_peak_! | 10.95          | - |
| chr1 | 23659099 | 23659174 | CSAR_peak_! | 13.48,14.88,,- | - |
| chr1 | 23659235 | 23659246 | CSAR_peak_! | 9.58           | - |
| chr1 | 23659337 | 23659476 | CSAR_peak_! | 35.24,13.51,,- | - |
| chr1 | 23659555 | 23659576 | CSAR_peak_! | 7.27           | - |
| chr1 | 23660260 | 23660309 | CSAR_peak_! | 13.44          | - |
| chr1 | 23660386 | 23660433 | CSAR_peak_! | 10.83          | - |
| chr1 | 23660593 | 23660672 | CSAR_peak_! | 12.13          | - |
| chr1 | 23660713 | 23660734 | CSAR_peak_! | 7.27           | - |

|      |          |          |             |                |   |
|------|----------|----------|-------------|----------------|---|
| chr1 | 23660834 | 23660926 | CSAR_peak_! | 9.58,6.21      | - |
| chr1 | 23661233 | 23661318 | CSAR_peak_! | 16.33,6.94     | - |
| chr1 | 23661648 | 23661698 | CSAR_peak_! | 6.57,10.52     | - |
| chr1 | 23661969 | 23662031 | CSAR_peak_! | 9.79           | - |
| chr1 | 23662119 | 23662159 | CSAR_peak_! | 9.72           | - |
| chr1 | 23662312 | 23662345 | CSAR_peak_! | 14.88          | - |
| chr1 | 23662419 | 23662464 | CSAR_peak_! | 8.28,8.39      | - |
| chr1 | 23662470 | 23662527 | CSAR_peak_! | 10.31          | - |
| chr1 | 23662772 | 23662817 | CSAR_peak_! | 7.27           | - |
| chr1 | 23663037 | 23663106 | CSAR_peak_! | 17.82          | - |
| chr1 | 23663251 | 23663302 | CSAR_peak_! | 10.83          | - |
| chr1 | 23663414 | 23663555 | CSAR_peak_! | 9.58,31.72,7.- | - |
| chr1 | 23663792 | 23663864 | CSAR_peak_! | 8.39,9.58      | - |
| chr1 | 23664614 | 23664619 | CSAR_peak_! | 7.27           | - |
| chr1 | 23667985 | 23668037 | CSAR_peak_! | 21.22,14.59    | - |
| chr1 | 23668090 | 23668182 | CSAR_peak_! | 17.88,14.34    | - |
| chr1 | 23668187 | 23668252 | CSAR_peak_! | 8.39,7.58      | - |
| chr1 | 23668319 | 23668364 | CSAR_peak_! | 11.38,6.57     | - |
| chr1 | 23668469 | 23668502 | CSAR_peak_! | 8.39           | - |
| chr1 | 23668570 | 23668584 | CSAR_peak_! | 6.03           | - |
| chr1 | 23668747 | 23668890 | CSAR_peak_! | 9.97,9.48,20.- | - |
| chr1 | 23668953 | 23669003 | CSAR_peak_! | 14.25,18.65,-  | - |
| chr1 | 23690148 | 23690235 | CSAR_peak_! | 11.14          | - |
| chr1 | 23699239 | 23699285 | CSAR_peak_! | 7.27           | - |
| chr1 | 23700283 | 23700326 | CSAR_peak_! | 10.83,8.39     | - |
| chr1 | 23701816 | 23701893 | CSAR_peak_! | 12.13,7.27,9.- | - |
| chr1 | 23702105 | 23702198 | CSAR_peak_! | 7.27,10.82     | - |
| chr1 | 23702306 | 23702688 | CSAR_peak_! | 26.92,18.95,-  | - |
| chr1 | 23702907 | 23702980 | CSAR_peak_! | 8.39           | - |
| chr1 | 23703079 | 23703136 | CSAR_peak_! | 7.27,12.13     | - |
| chr1 | 23703554 | 23703611 | CSAR_peak_! | 16.33,6.57     | - |
| chr1 | 23703786 | 23703851 | CSAR_peak_! | 23.49,21.37    | - |
| chr1 | 23703898 | 23703978 | CSAR_peak_! | 13.48          | - |
| chr1 | 23704192 | 23704264 | CSAR_peak_! | 17.82          | - |
| chr1 | 23704364 | 23704427 | CSAR_peak_! | 27.64,24.21    | - |
| chr1 | 23704450 | 23704579 | CSAR_peak_! | 17.4,22.52     | - |
| chr1 | 23704747 | 23704871 | CSAR_peak_! | 33.03,17.82    | - |
| chr1 | 23704883 | 23704952 | CSAR_peak_! | 6.21           | - |
| chr1 | 23704965 | 23705034 | CSAR_peak_! | 7.27           | - |
| chr1 | 23705147 | 23705281 | CSAR_peak_! | 18.73,55.05    | - |
| chr1 | 23705387 | 23705454 | CSAR_peak_! | 10.83          | - |
| chr1 | 23705533 | 23705720 | CSAR_peak_! | 19.67,9.19,1(- | - |

|      |          |          |             |                |
|------|----------|----------|-------------|----------------|
| chr1 | 23711464 | 23711591 | CSAR_peak_  | 8.65,6.21,14.- |
| chr1 | 23712414 | 23712668 | CSAR_peak_  | 16.08,31.2,1:- |
| chr1 | 23713051 | 23713139 | CSAR_peak_! | 12.13,7.27 -   |
| chr1 | 23713163 | 23713220 | CSAR_peak_! | 10.02 -        |
| chr1 | 23713297 | 23713393 | CSAR_peak_! | 14.88 -        |
| chr1 | 23713774 | 23713855 | CSAR_peak_! | 6.21 -         |
| chr1 | 23714062 | 23714111 | CSAR_peak_! | 8.39 -         |
| chr1 | 23714211 | 23714312 | CSAR_peak_! | 7.73,10.82,1(- |
| chr1 | 23714385 | 23714421 | CSAR_peak_! | 6.21 -         |
| chr1 | 23714486 | 23714577 | CSAR_peak_! | 33.03,22.52 -  |
| chr1 | 23714610 | 23714646 | CSAR_peak_! | 6.94 -         |
| chr1 | 23714699 | 23714743 | CSAR_peak_! | 6.21 -         |
| chr1 | 23714796 | 23714901 | CSAR_peak_! | 8.95,6.44 -    |
| chr1 | 23714921 | 23714989 | CSAR_peak_! | 7.92,14.88 -   |
| chr1 | 23715129 | 23715220 | CSAR_peak_! | 9.58 -         |
| chr1 | 23715237 | 23715328 | CSAR_peak_! | 25.08,28.34 -  |
| chr1 | 23715447 | 23715497 | CSAR_peak_! | 7.27 -         |
| chr1 | 23715566 | 23715774 | CSAR_peak_! | 70.6,30.35 -   |
| chr1 | 23715898 | 23715951 | CSAR_peak_! | 7.27 -         |
| chr1 | 23759528 | 23759560 | CSAR_peak_! | 6.03 -         |
| chr1 | 23804143 | 23804197 | CSAR_peak_! | 8.39 -         |
| chr1 | 23804203 | 23804284 | CSAR_peak_! | 9.58,9.58 -    |
| chr1 | 23804945 | 23805004 | CSAR_peak_! | 17.82 -        |
| chr1 | 23805104 | 23805178 | CSAR_peak_! | 7.27 -         |
| chr1 | 23825898 | 23825971 | CSAR_peak_! | 8.39,6.21 -    |
| chr1 | 23827812 | 23827871 | CSAR_peak_! | 9.58 -         |
| chr1 | 23828979 | 23829079 | CSAR_peak_! | 7.27,7.27 -    |
| chr1 | 23829088 | 23829115 | CSAR_peak_! | 7.27 -         |
| chr1 | 23829200 | 23829205 | CSAR_peak_! | 6.21 -         |
| chr1 | 23829279 | 23829356 | CSAR_peak_! | 6.21 -         |
| chr1 | 23853443 | 23853572 | CSAR_peak_! | 14.88,5.86,1(- |
| chr1 | 23853788 | 23853907 | CSAR_peak_! | 25.91,6.21 -   |
| chr1 | 23854542 | 23854620 | CSAR_peak_! | 8.39,22.56 -   |
| chr1 | 23854722 | 23854768 | CSAR_peak_! | 19.36,7.92 -   |
| chr1 | 23943778 | 23943877 | CSAR_peak_! | 8.39 -         |
| chr1 | 23975303 | 23975371 | CSAR_peak_! | 6.95 -         |
| chr1 | 24024177 | 24024218 | CSAR_peak_! | 10.83 -        |
| chr1 | 24045766 | 24045810 | CSAR_peak_! | 7.27 -         |
| chr1 | 24046073 | 24046141 | CSAR_peak_! | 10.95 -        |
| chr1 | 24046178 | 24046388 | CSAR_peak_! | 8.53,10.31,1(- |
| chr1 | 24046752 | 24046815 | CSAR_peak_! | 9.58 -         |
| chr1 | 24046818 | 24047031 | CSAR_peak_! | 13.66,32.45,-  |

|      |          |          |             |                |   |
|------|----------|----------|-------------|----------------|---|
| chr1 | 24047113 | 24047130 | CSAR_peak_! | 8.65           | - |
| chr1 | 24047264 | 24047309 | CSAR_peak_! | 14.85          | - |
| chr1 | 24047381 | 24047460 | CSAR_peak_! | 21.24,6.64     | - |
| chr1 | 24047787 | 24047852 | CSAR_peak_! | 29.4,7.34      | - |
| chr1 | 24047927 | 24047979 | CSAR_peak_! | 20.43          | - |
| chr1 | 24048040 | 24048068 | CSAR_peak_! | 10.02          | - |
| chr1 | 24048088 | 24048158 | CSAR_peak_! | 7.35           | - |
| chr1 | 24052781 | 24052838 | CSAR_peak_! | 9.58           | - |
| chr1 | 24052902 | 24052928 | CSAR_peak_! | 6.54           | - |
| chr1 | 24053619 | 24053693 | CSAR_peak_! | 20.43,6.21     | - |
| chr1 | 24054307 | 24054362 | CSAR_peak_! | 6.21           | - |
| chr1 | 24054671 | 24054831 | CSAR_peak_! | 31.73,21.94    | - |
| chr1 | 24054913 | 24055005 | CSAR_peak_! | 7.27,7.27      | - |
| chr1 | 24055153 | 24055227 | CSAR_peak_! | 24.21,7.58     | - |
| chr1 | 24055392 | 24055476 | CSAR_peak_! | 7.58,6.81      | - |
| chr1 | 24055995 | 24056043 | CSAR_peak_! | 12.13          | - |
| chr1 | 24066736 | 24066782 | CSAR_peak_! | 7.27           | - |
| chr1 | 24068915 | 24068958 | CSAR_peak_! | 7.58           | - |
| chr1 | 24069412 | 24069464 | CSAR_peak_! | 7.27           | - |
| chr1 | 24070214 | 24070259 | CSAR_peak_! | 7.58           | - |
| chr1 | 24070612 | 24070670 | CSAR_peak_! | 9.58,10.83     | - |
| chr1 | 24071079 | 24071127 | CSAR_peak_! | 6.21           | - |
| chr1 | 24071432 | 24071487 | CSAR_peak_! | 7.27           | - |
| chr1 | 24072252 | 24072302 | CSAR_peak_! | 7.27           | - |
| chr1 | 24073216 | 24073253 | CSAR_peak_! | 8.39,7.92      | - |
| chr1 | 24073603 | 24073607 | CSAR_peak_! | 6.03           | - |
| chr1 | 24074686 | 24074737 | CSAR_peak_! | 8.39           | - |
| chr1 | 24074893 | 24074961 | CSAR_peak_! | 9.58,14.88     | - |
| chr1 | 24076209 | 24076264 | CSAR_peak_! | 9.58           | - |
| chr1 | 24076716 | 24076775 | CSAR_peak_! | 7.27           | - |
| chr1 | 24077421 | 24077452 | CSAR_peak_! | 5.86           | - |
| chr1 | 24078436 | 24078478 | CSAR_peak_! | 9.58           | - |
| chr1 | 24078624 | 24078667 | CSAR_peak_! | 5.86           | - |
| chr1 | 24079422 | 24079469 | CSAR_peak_! | 9.58           | - |
| chr1 | 24079580 | 24079650 | CSAR_peak_! | 7.27           | - |
| chr1 | 24080166 | 24080238 | CSAR_peak_! | 7.92           | - |
| chr1 | 24137886 | 24137930 | CSAR_peak_! | 7.27           | - |
| chr1 | 24138166 | 24138224 | CSAR_peak_! | 8.39           | - |
| chr1 | 24141449 | 24141524 | CSAR_peak_! | 10.83,7.27     | - |
| chr1 | 24142740 | 24142815 | CSAR_peak_! | 9.58,6.21      | - |
| chr1 | 24143323 | 24143394 | CSAR_peak_! | 8.14,8.65,13.- | - |
| chr1 | 24156140 | 24156192 | CSAR_peak_! | 6.21           | - |

|      |          |          |             |                |   |
|------|----------|----------|-------------|----------------|---|
| chr1 | 24174205 | 24174262 | CSAR_peak_! | 7.27,13.48     | - |
| chr1 | 24301364 | 24301400 | CSAR_peak_! | 6.87           | - |
| chr1 | 24301628 | 24301701 | CSAR_peak_! | 7.27,6.21      | - |
| chr1 | 24302220 | 24302320 | CSAR_peak_! | 9.58           | - |
| chr1 | 24302392 | 24302432 | CSAR_peak_! | 8.39           | - |
| chr1 | 24303507 | 24303568 | CSAR_peak_! | 7.92           | - |
| chr1 | 24303694 | 24303742 | CSAR_peak_! | 12.13,14.88    | - |
| chr1 | 24304177 | 24304189 | CSAR_peak_! | 13.48          | - |
| chr1 | 24304458 | 24304524 | CSAR_peak_! | 24.52          | - |
| chr1 | 24304527 | 24304544 | CSAR_peak_! | 6.21           | - |
| chr1 | 24304681 | 24304786 | CSAR_peak_! | 9.58           | - |
| chr1 | 24304940 | 24304980 | CSAR_peak_! | 7.27           | - |
| chr1 | 24306050 | 24306184 | CSAR_peak_! | 8.39,12.13,9.- | - |
| chr1 | 24307028 | 24307165 | CSAR_peak_! | 8.14           | - |
| chr1 | 24307176 | 24307252 | CSAR_peak_! | 6.81,8.2       | - |
| chr1 | 24307438 | 24307502 | CSAR_peak_! | 12.74,5.86     | - |
| chr1 | 24307709 | 24307782 | CSAR_peak_! | 6.21,17.4,8.1- | - |
| chr1 | 24307874 | 24307930 | CSAR_peak_! | 6.21           | - |
| chr1 | 24308329 | 24308424 | CSAR_peak_! | 14.88          | - |
| chr1 | 24309007 | 24309114 | CSAR_peak_! | 16.33,13.48    | - |
| chr1 | 24309248 | 24309302 | CSAR_peak_! | 13.48,6.21     | - |
| chr1 | 24310387 | 24310462 | CSAR_peak_! | 9.58,7.27      | - |
| chr1 | 24310567 | 24310631 | CSAR_peak_! | 12.13          | - |
| chr1 | 24311229 | 24311276 | CSAR_peak_! | 12.13,5.86     | - |
| chr1 | 24311295 | 24311368 | CSAR_peak_! | 15.2,9.27      | - |
| chr1 | 24311410 | 24311489 | CSAR_peak_! | 10.02,10.83    | - |
| chr1 | 24311516 | 24311551 | CSAR_peak_! | 7.27           | - |
| chr1 | 24311756 | 24311812 | CSAR_peak_! | 7.27           | - |
| chr1 | 24311889 | 24311997 | CSAR_peak_! | 20.94,13.44    | - |
| chr1 | 24312071 | 24312110 | CSAR_peak_! | 8.39           | - |
| chr1 | 24312210 | 24312234 | CSAR_peak_! | 6.21           | - |
| chr1 | 24312358 | 24312437 | CSAR_peak_! | 29.69,9.97     | - |
| chr1 | 24312441 | 24312492 | CSAR_peak_! | 7.27           | - |
| chr1 | 24312684 | 24312800 | CSAR_peak_! | 18.4,10.02     | - |
| chr1 | 24312878 | 24312952 | CSAR_peak_! | 9.77,9.77      | - |
| chr1 | 24313133 | 24313185 | CSAR_peak_! | 8.39           | - |
| chr1 | 24313483 | 24313586 | CSAR_peak_! | 9.55           | - |
| chr1 | 24314080 | 24314115 | CSAR_peak_! | 8.14           | - |
| chr1 | 24314297 | 24314347 | CSAR_peak_! | 21.94          | - |
| chr1 | 24362567 | 24362665 | CSAR_peak_! | 27.64,12.31    | - |
| chr1 | 24362732 | 24362827 | CSAR_peak_! | 29.69,27.61,(- | - |
| chr1 | 24362974 | 24363001 | CSAR_peak_! | 8.95           | - |

|      |          |          |             |                |   |
|------|----------|----------|-------------|----------------|---|
| chr1 | 24363048 | 24363058 | CSAR_peak_! | 6.03           | - |
| chr1 | 24363649 | 24363685 | CSAR_peak_! | 6.03           | - |
| chr1 | 24364246 | 24364290 | CSAR_peak_! | 9.32           | - |
| chr1 | 24364786 | 24364873 | CSAR_peak_! | 6.81,8.65      | - |
| chr1 | 24365359 | 24365411 | CSAR_peak_! | 14.88,14.88    | - |
| chr1 | 24365494 | 24365541 | CSAR_peak_! | 8.39,9.58,12.  | - |
| chr1 | 24365873 | 24365936 | CSAR_peak_! | 6.85,6.57      | - |
| chr1 | 24378148 | 24378214 | CSAR_peak_! | 7.27           | - |
| chr1 | 24378345 | 24378444 | CSAR_peak_! | 12.13,13.48    | - |
| chr1 | 24379172 | 24379193 | CSAR_peak_! | 7.27           | - |
| chr1 | 24379213 | 24379243 | CSAR_peak_! | 9.58           | - |
| chr1 | 24379695 | 24379731 | CSAR_peak_! | 7.58           | - |
| chr1 | 24379804 | 24379922 | CSAR_peak_! | 19.36,12.17    | - |
| chr1 | 24380090 | 24380141 | CSAR_peak_! | 8.39           | - |
| chr1 | 24380237 | 24380316 | CSAR_peak_! | 7.27           | - |
| chr1 | 24380321 | 24380367 | CSAR_peak_! | 12.17          | - |
| chr1 | 24380535 | 24380628 | CSAR_peak_! | 7.61,6.11,19.  | - |
| chr1 | 24381045 | 24381092 | CSAR_peak_! | 7.34           | - |
| chr1 | 24381097 | 24381142 | CSAR_peak_! | 6.44           | - |
| chr1 | 24381144 | 24381241 | CSAR_peak_! | 17.4,7,29.4,9- | - |
| chr1 | 24381499 | 24381618 | CSAR_peak_! | 7.34,16.23,6.- | - |
| chr1 | 24381657 | 24381787 | CSAR_peak_! | 19.36,18.95    | - |
| chr1 | 24381815 | 24381893 | CSAR_peak_! | 10.95,12.13    | - |
| chr1 | 24381946 | 24382037 | CSAR_peak_! | 7.27,12.6,7.7- | - |
| chr1 | 24382226 | 24382314 | CSAR_peak_! | 9.58,21.56     | - |
| chr1 | 24382533 | 24382594 | CSAR_peak_! | 13.51,12.13    | - |
| chr1 | 24382634 | 24382699 | CSAR_peak_! | 7.34,7.58      | - |
| chr1 | 24382705 | 24382814 | CSAR_peak_! | 8.39,6.21,7.5- | - |
| chr1 | 24383122 | 24383188 | CSAR_peak_! | 9.77           | - |
| chr1 | 24383226 | 24383247 | CSAR_peak_! | 7.27           | - |
| chr1 | 24383345 | 24383374 | CSAR_peak_! | 5.86           | - |
| chr1 | 24383416 | 24383511 | CSAR_peak_! | 8.14,7.27      | - |
| chr1 | 24383527 | 24383569 | CSAR_peak_! | 11.14          | - |
| chr1 | 24383696 | 24383742 | CSAR_peak_! | 7.27           | - |
| chr1 | 24415369 | 24415421 | CSAR_peak_! | 6.21           | - |
| chr1 | 24415435 | 24415507 | CSAR_peak_! | 6.21           | - |
| chr1 | 24431886 | 24431923 | CSAR_peak_! | 7.27           | - |
| chr1 | 24493425 | 24493486 | CSAR_peak_! | 9.41,7.27      | - |
| chr1 | 24547473 | 24547547 | CSAR_peak_! | 14.88,6.21     | - |
| chr1 | 24550057 | 24550104 | CSAR_peak_! | 8.39           | - |
| chr1 | 24550419 | 24550499 | CSAR_peak_! | 12.13,6.57     | - |
| chr1 | 24564517 | 24564590 | CSAR_peak_! | 7.58,19.36     | - |

|      |          |          |             |                |   |
|------|----------|----------|-------------|----------------|---|
| chr1 | 24568362 | 24568417 | CSAR_peak_! | 7.58           | - |
| chr1 | 24595989 | 24596068 | CSAR_peak_! | 6.57,6.21      | - |
| chr1 | 24597192 | 24597230 | CSAR_peak_! | 9.77           | - |
| chr1 | 24597508 | 24597550 | CSAR_peak_! | 7.27           | - |
| chr1 | 24606281 | 24606363 | CSAR_peak_! | 6.21           | - |
| chr1 | 24655764 | 24655868 | CSAR_peak_! | 9.97,21.22     | - |
| chr1 | 24656063 | 24656095 | CSAR_peak_! | 7.27           | - |
| chr1 | 24656187 | 24656235 | CSAR_peak_! | 7.58,7.27      | - |
| chr1 | 24656500 | 24656590 | CSAR_peak_! | 16.22,25.18    | - |
| chr1 | 24656662 | 24656727 | CSAR_peak_! | 21.35,8.5      | - |
| chr1 | 24657232 | 24657272 | CSAR_peak_! | 9.77           | - |
| chr1 | 24657452 | 24657492 | CSAR_peak_! | 16.33          | - |
| chr1 | 24686788 | 24686843 | CSAR_peak_! | 11.03          | - |
| chr1 | 24695783 | 24695850 | CSAR_peak_! | 8.39,6.44      | - |
| chr1 | 24696001 | 24696039 | CSAR_peak_! | 10.31          | - |
| chr1 | 24696184 | 24696244 | CSAR_peak_! | 8.92,6.64      | - |
| chr1 | 24696333 | 24696502 | CSAR_peak_! | 12.6,10.94,2!  | - |
| chr1 | 24696608 | 24696736 | CSAR_peak_! | 31.51,42.94    | - |
| chr1 | 24696740 | 24696998 | CSAR_peak_! | 25.91,8.65,2!  | - |
| chr1 | 24697222 | 24697279 | CSAR_peak_! | 9.58           | - |
| chr1 | 24697287 | 24697339 | CSAR_peak_! | 12.13          | - |
| chr1 | 24697600 | 24697675 | CSAR_peak_! | 13.48,16.34    | - |
| chr1 | 24697813 | 24697911 | CSAR_peak_! | 6.45,17.82,1!  | - |
| chr1 | 24700441 | 24700506 | CSAR_peak_! | 9.58           | - |
| chr1 | 24706921 | 24706983 | CSAR_peak_! | 7.27,14.88     | - |
| chr1 | 24707043 | 24707152 | CSAR_peak_! | 8.52,12.13     | - |
| chr1 | 24707235 | 24707323 | CSAR_peak_! | 20.43,22.83,!  | - |
| chr1 | 24707436 | 24707493 | CSAR_peak_! | 22.58,15.68    | - |
| chr1 | 24707584 | 24707658 | CSAR_peak_! | 25.91,29.2     | - |
| chr1 | 24708459 | 24708527 | CSAR_peak_! | 9.58,7.27      | - |
| chr1 | 24709345 | 24709442 | CSAR_peak_! | 21.94,14.76    | - |
| chr1 | 24709573 | 24709616 | CSAR_peak_! | 8.28           | - |
| chr1 | 24729784 | 24729867 | CSAR_peak_! | 16.33,9.58     | - |
| chr1 | 24729987 | 24730048 | CSAR_peak_! | 7.27,14.88     | - |
| chr1 | 24730131 | 24730173 | CSAR_peak_! | 25.91,15,6.0!  | - |
| chr1 | 24730183 | 24730207 | CSAR_peak_! | 9.58           | - |
| chr1 | 24730345 | 24730449 | CSAR_peak_! | 20.43          | - |
| chr1 | 24730529 | 24730612 | CSAR_peak_! | 26.55,20.43    | - |
| chr1 | 24730743 | 24730800 | CSAR_peak_! | 6.87           | - |
| chr1 | 24730857 | 24730918 | CSAR_peak_! | 7.34,6.21      | - |
| chr1 | 24731007 | 24731119 | CSAR_peak_! | 6.21,8.39,6.9- | - |
| chr1 | 24731187 | 24731219 | CSAR_peak_! | 7.27           | - |



|      |          |          |             |                |   |
|------|----------|----------|-------------|----------------|---|
| chr1 | 24731366 | 24731426 | CSAR_peak_! | 7.27           | - |
| chr1 | 24731721 | 24731764 | CSAR_peak_! | 13.51          | - |
| chr1 | 24732017 | 24732082 | CSAR_peak_! | 6.03,7.27      | - |
| chr1 | 24774385 | 24774480 | CSAR_peak_! | 17.82          | - |
| chr1 | 24774517 | 24774559 | CSAR_peak_! | 8.52           | - |
| chr1 | 24774614 | 24774671 | CSAR_peak_! | 9.77           | - |
| chr1 | 24774673 | 24774816 | CSAR_peak_! | 14.76,6.03,1(- | - |
| chr1 | 24775718 | 24775813 | CSAR_peak_! | 17.82,10.83    | - |
| chr1 | 24807046 | 24807106 | CSAR_peak_! | 6.21           | - |
| chr1 | 24811275 | 24811524 | CSAR_peak_! | 35.83,18.95    | - |
| chr1 | 24811532 | 24811803 | CSAR_peak_! | 12.12,16.22,;- | - |
| chr1 | 24812276 | 24812352 | CSAR_peak_! | 13.44          | - |
| chr1 | 24812432 | 24812559 | CSAR_peak_! | 39.34,30.81    | - |
| chr1 | 24819462 | 24819505 | CSAR_peak_! | 9.58           | - |
| chr1 | 24819981 | 24820027 | CSAR_peak_! | 6.21           | - |
| chr1 | 24820183 | 24820231 | CSAR_peak_! | 7.27           | - |
| chr1 | 24864199 | 24864235 | CSAR_peak_! | 9.77           | - |
| chr1 | 24864315 | 24864354 | CSAR_peak_! | 7.27           | - |
| chr1 | 24864639 | 24864682 | CSAR_peak_! | 9.58,8.65      | - |
| chr1 | 24864755 | 24864769 | CSAR_peak_! | 6.21           | - |
| chr1 | 24866955 | 24867013 | CSAR_peak_! | 10.83          | - |
| chr1 | 24868825 | 24868901 | CSAR_peak_! | 20.94,10.83    | - |
| chr1 | 24997694 | 24997750 | CSAR_peak_! | 7.27           | - |
| chr1 | 24999555 | 24999581 | CSAR_peak_! | 8.39           | - |
| chr1 | 25044975 | 25045023 | CSAR_peak_! | 6.21           | - |
| chr1 | 25045623 | 25045735 | CSAR_peak_! | 9.58           | - |
| chr1 | 25045993 | 25046034 | CSAR_peak_! | 16.33          | - |
| chr1 | 25047633 | 25047678 | CSAR_peak_! | 6.03           | - |
| chr1 | 25048099 | 25048149 | CSAR_peak_! | 12.13          | - |
| chr1 | 25048497 | 25048741 | CSAR_peak_! | 55.61,25.21    | - |
| chr1 | 25048838 | 25048894 | CSAR_peak_! | 21.39,34.78    | - |
| chr1 | 25048931 | 25049002 | CSAR_peak_! | 19.01,42.83    | - |
| chr1 | 25049079 | 25049150 | CSAR_peak_! | 34.86,23.07    | - |
| chr1 | 25077948 | 25077992 | CSAR_peak_! | 7.27           | - |
| chr1 | 25101031 | 25101089 | CSAR_peak_! | 8.39           | - |
| chr1 | 25102405 | 25102449 | CSAR_peak_! | 12.13          | - |
| chr1 | 25102568 | 25102689 | CSAR_peak_! | 9.58           | - |
| chr1 | 25106179 | 25106223 | CSAR_peak_! | 9.58           | - |
| chr1 | 25106816 | 25106860 | CSAR_peak_! | 7.27           | - |
| chr1 | 25106885 | 25106951 | CSAR_peak_! | 6.21           | - |
| chr1 | 25107269 | 25107317 | CSAR_peak_! | 10.12,27.64    | - |
| chr1 | 25107429 | 25107497 | CSAR_peak_! | 11.38,25.1     | - |

|      |          |          |             |               |   |
|------|----------|----------|-------------|---------------|---|
| chr1 | 25107593 | 25107635 | CSAR_peak_! | 14.88         | - |
| chr1 | 25109483 | 25109544 | CSAR_peak_! | 10.83         | - |
| chr1 | 25109649 | 25109662 | CSAR_peak_! | 6.57          | - |
| chr1 | 25110136 | 25110214 | CSAR_peak_! | 6.21          | - |
| chr1 | 25110351 | 25110418 | CSAR_peak_! | 8.65          | - |
| chr1 | 25111329 | 25111380 | CSAR_peak_! | 9.58          | - |
| chr1 | 25111749 | 25111813 | CSAR_peak_! | 9.58          | - |
| chr1 | 25112499 | 25112555 | CSAR_peak_! | 9.58,6.21     | - |
| chr1 | 25112852 | 25112910 | CSAR_peak_! | 19.36,7.27    | - |
| chr1 | 25114537 | 25114582 | CSAR_peak_! | 10.31         | - |
| chr1 | 25115788 | 25115824 | CSAR_peak_! | 10.02         | - |
| chr1 | 25151610 | 25151667 | CSAR_peak_! | 6.57          | - |
| chr1 | 25151712 | 25151756 | CSAR_peak_! | 19.36         | - |
| chr1 | 25151842 | 25151883 | CSAR_peak_! | 14.88         | - |
| chr1 | 25151973 | 25152011 | CSAR_peak_! | 10.83,8.39    | - |
| chr1 | 25152119 | 25152171 | CSAR_peak_! | 9.77,7        | - |
| chr1 | 25152216 | 25152287 | CSAR_peak_! | 23            | - |
| chr1 | 25152309 | 25152350 | CSAR_peak_! | 9.77          | - |
| chr1 | 25153068 | 25153111 | CSAR_peak_! | 7.27          | - |
| chr1 | 25153145 | 25153227 | CSAR_peak_! | 17.4,14.25    | - |
| chr1 | 25153478 | 25153817 | CSAR_peak_! | 16.33,17.82,! | - |
| chr1 | 25153836 | 25154013 | CSAR_peak_! | 20.43,10.33   | - |
| chr1 | 25154071 | 25154130 | CSAR_peak_! | 10.83         | - |
| chr1 | 25154476 | 25154560 | CSAR_peak_! | 7.27,17.82    | - |
| chr1 | 25154645 | 25154713 | CSAR_peak_! | 15,6.45       | - |
| chr1 | 25154874 | 25154916 | CSAR_peak_! | 9.61,7.58     | - |
| chr1 | 25155091 | 25155237 | CSAR_peak_! | 7,16.33,7.27  | - |
| chr1 | 25155245 | 25155290 | CSAR_peak_! | 9.77          | - |
| chr1 | 25156031 | 25156087 | CSAR_peak_! | 9.58          | - |
| chr1 | 25188692 | 25188743 | CSAR_peak_! | 17.82         | - |
| chr1 | 25189496 | 25189551 | CSAR_peak_! | 8.95          | - |
| chr1 | 25194635 | 25194683 | CSAR_peak_! | 6.81          | - |
| chr1 | 25194925 | 25194976 | CSAR_peak_! | 6.21          | - |
| chr1 | 25196092 | 25196174 | CSAR_peak_! | 8.14          | - |
| chr1 | 25196661 | 25196719 | CSAR_peak_! | 9.58          | - |
| chr1 | 25196727 | 25196795 | CSAR_peak_! | 6.03,7.27     | - |
| chr1 | 25198200 | 25198281 | CSAR_peak_! | 13.48,7.27    | - |
| chr1 | 25198394 | 25198431 | CSAR_peak_! | 7.27,7.27     | - |
| chr1 | 25198513 | 25198568 | CSAR_peak_! | 6.95,17.82    | - |
| chr1 | 25198910 | 25198960 | CSAR_peak_! | 6.21          | - |
| chr1 | 25200043 | 25200141 | CSAR_peak_! | 12.13         | - |
| chr1 | 25200258 | 25200262 | CSAR_peak_! | 7.27          | - |

|      |          |          |             |                  |   |
|------|----------|----------|-------------|------------------|---|
| chr1 | 25200425 | 25200487 | CSAR_peak_1 | 34.89,12.13      | - |
| chr1 | 25200558 | 25200599 | CSAR_peak_1 | 9.61,6.1         | - |
| chr1 | 25200754 | 25200839 | CSAR_peak_1 | 9.77,16.33       | - |
| chr1 | 25201101 | 25201133 | CSAR_peak_1 | 6.44             | - |
| chr1 | 25201141 | 25201213 | CSAR_peak_1 | 6.81             | - |
| chr1 | 25201568 | 25201640 | CSAR_peak_1 | 13.48,19.36      | - |
| chr1 | 25201747 | 25201781 | CSAR_peak_1 | 7.27             | - |
| chr1 | 25201828 | 25201886 | CSAR_peak_1 | 12.17,8.39       | - |
| chr1 | 25202034 | 25202071 | CSAR_peak_1 | 9.58             | - |
| chr1 | 25202191 | 25202279 | CSAR_peak_1 | 7.27             | - |
| chr1 | 25202382 | 25202471 | CSAR_peak_1 | 11.38,20.54      | - |
| chr1 | 25206644 | 25206721 | CSAR_peak_1 | 6.21             | - |
| chr1 | 25208282 | 25208354 | CSAR_peak_1 | 14.88            | - |
| chr1 | 25210058 | 25210094 | CSAR_peak_1 | 6.21             | - |
| chr1 | 25212135 | 25212175 | CSAR_peak_1 | 9.58             | - |
| chr1 | 25212404 | 25212414 | CSAR_peak_1 | 9.58             | - |
| chr1 | 25248644 | 25248718 | CSAR_peak_1 | 12.13            | - |
| chr1 | 25249020 | 25249071 | CSAR_peak_1 | 6.03             | - |
| chr1 | 25280724 | 25280778 | CSAR_peak_1 | 8.95             | - |
| chr1 | 25280852 | 25280916 | CSAR_peak_1 | 14.76            | - |
| chr1 | 25282444 | 25282503 | CSAR_peak_1 | 6.02,6.02        | - |
| chr1 | 25282753 | 25282791 | CSAR_peak_1 | 7.27             | - |
| chr1 | 25283230 | 25283310 | CSAR_peak_1 | 18.95,25.62      | - |
| chr1 | 25283380 | 25283404 | CSAR_peak_1 | 8.39,7.27        | - |
| chr1 | 25285924 | 25285982 | CSAR_peak_1 | 7.27,6.21        | - |
| chr1 | 25327717 | 25327782 | CSAR_peak_1 | 7.34,10.31       | - |
| chr1 | 25328103 | 25328138 | CSAR_peak_1 | 7.27             | - |
| chr1 | 25328582 | 25328649 | CSAR_peak_1 | 12.13            | - |
| chr1 | 25329680 | 25329775 | CSAR_peak_1 | 13.48,9.58       | - |
| chr1 | 25329778 | 25329851 | CSAR_peak_1 | 12.13,9.58       | - |
| chr1 | 25329863 | 25329951 | CSAR_peak_1 | 8.95             | - |
| chr1 | 25330570 | 25330627 | CSAR_peak_1 | 10.83,13.48      | - |
| chr1 | 25330678 | 25330729 | CSAR_peak_1 | 7.27             | - |
| chr1 | 25330753 | 25330826 | CSAR_peak_1 | 22.69,6.81,14.88 | - |
| chr1 | 25330843 | 25330903 | CSAR_peak_1 | 13.48,16.33      | - |
| chr1 | 25334082 | 25334143 | CSAR_peak_1 | 8.39             | - |
| chr1 | 25367888 | 25367946 | CSAR_peak_1 | 9.58             | - |
| chr1 | 25394458 | 25394587 | CSAR_peak_1 | 25.07,18.1       | - |
| chr1 | 25394615 | 25394681 | CSAR_peak_1 | 20.54            | - |
| chr1 | 25423001 | 25423067 | CSAR_peak_1 | 12.13            | - |
| chr1 | 25482061 | 25482112 | CSAR_peak_1 | 7.27             | - |
| chr1 | 25483147 | 25483232 | CSAR_peak_1 | 9.77             | - |

|      |          |          |             |               |   |
|------|----------|----------|-------------|---------------|---|
| chr1 | 25483545 | 25483613 | CSAR_peak_1 | 7.92,9.58     | - |
| chr1 | 25484002 | 25484052 | CSAR_peak_1 | 7.27          | - |
| chr1 | 25484888 | 25484979 | CSAR_peak_1 | 14.88         | - |
| chr1 | 25485150 | 25485253 | CSAR_peak_1 | 9.58          | - |
| chr1 | 25485295 | 25485346 | CSAR_peak_1 | 6.57          | - |
| chr1 | 25485486 | 25485681 | CSAR_peak_1 | 9.77,9.58,7.2 | - |
| chr1 | 25511388 | 25511432 | CSAR_peak_1 | 7.27          | - |
| chr1 | 25511673 | 25511711 | CSAR_peak_1 | 7.92,6.21     | - |
| chr1 | 25511792 | 25511870 | CSAR_peak_1 | 6.81,9.77     | - |
| chr1 | 25511892 | 25512089 | CSAR_peak_1 | 25.07,24.52,1 | - |
| chr1 | 25512164 | 25512323 | CSAR_peak_1 | 17.82,13.48   | - |
| chr1 | 25512603 | 25512661 | CSAR_peak_1 | 7.27          | - |
| chr1 | 25512682 | 25512754 | CSAR_peak_1 | 24.21,14.76   | - |
| chr1 | 25512824 | 25512858 | CSAR_peak_1 | 6.21          | - |
| chr1 | 25513090 | 25513138 | CSAR_peak_1 | 12.13         | - |
| chr1 | 25513212 | 25513284 | CSAR_peak_1 | 7.27,7.27     | - |
| chr1 | 25513586 | 25513639 | CSAR_peak_1 | 12.17,13.48   | - |
| chr1 | 25513809 | 25513908 | CSAR_peak_1 | 12.2,28.96,8. | - |
| chr1 | 25513986 | 25514054 | CSAR_peak_1 | 18.49,12.6,9. | - |
| chr1 | 25514075 | 25514119 | CSAR_peak_1 | 6.95          | - |
| chr1 | 25514252 | 25514305 | CSAR_peak_1 | 7.27          | - |
| chr1 | 25515659 | 25515714 | CSAR_peak_1 | 9.58          | - |
| chr1 | 25539422 | 25539520 | CSAR_peak_1 | 11.38,6.21    | - |
| chr1 | 25539561 | 25539640 | CSAR_peak_1 | 17.82,17.82   | - |
| chr1 | 25540282 | 25540329 | CSAR_peak_1 | 7.27,7.27     | - |
| chr1 | 25540374 | 25540449 | CSAR_peak_1 | 12.13         | - |
| chr1 | 25541328 | 25541403 | CSAR_peak_1 | 9.58          | - |
| chr1 | 25632583 | 25632668 | CSAR_peak_1 | 14.88         | - |
| chr1 | 25632829 | 25632882 | CSAR_peak_1 | 9.58          | - |
| chr1 | 25632900 | 25632919 | CSAR_peak_1 | 9.58          | - |
| chr1 | 25633014 | 25633053 | CSAR_peak_1 | 7.27          | - |
| chr1 | 25633839 | 25633906 | CSAR_peak_1 | 13.48,6.21    | - |
| chr1 | 25634061 | 25634121 | CSAR_peak_1 | 7.27          | - |
| chr1 | 25649847 | 25649897 | CSAR_peak_1 | 9.58          | - |
| chr1 | 25650269 | 25650376 | CSAR_peak_1 | 25.91,6.03    | - |
| chr1 | 25650410 | 25650488 | CSAR_peak_1 | 7.27,13.48    | - |
| chr1 | 25650561 | 25650619 | CSAR_peak_1 | 13.48         | - |
| chr1 | 25650773 | 25650833 | CSAR_peak_1 | 9.55,6.21     | - |
| chr1 | 25650885 | 25650979 | CSAR_peak_1 | 8.39,9.58     | - |
| chr1 | 25651278 | 25651310 | CSAR_peak_1 | 5.86          | - |
| chr1 | 25651322 | 25651357 | CSAR_peak_1 | 5.86          | - |
| chr1 | 25651418 | 25651455 | CSAR_peak_1 | 9.58          | - |

|      |          |          |             |                   |   |
|------|----------|----------|-------------|-------------------|---|
| chr1 | 25651484 | 25651572 | CSAR_peak_! | 12.54,7.58        | - |
| chr1 | 25651756 | 25651798 | CSAR_peak_! | 8.39              | - |
| chr1 | 25652124 | 25652176 | CSAR_peak_! | 6.44              | - |
| chr1 | 25652274 | 25652359 | CSAR_peak_! | 14.88,7.27        | - |
| chr1 | 25709102 | 25709152 | CSAR_peak_! | 8.39,9.58         | - |
| chr1 | 25709352 | 25709432 | CSAR_peak_! | 17.82             | - |
| chr1 | 25709795 | 25709878 | CSAR_peak_! | 16.33             | - |
| chr1 | 25710457 | 25710505 | CSAR_peak_! | 6.21              | - |
| chr1 | 25710762 | 25710825 | CSAR_peak_! | 7.27              | - |
| chr1 | 25712951 | 25712999 | CSAR_peak_! | 7.27              | - |
| chr1 | 25713078 | 25713170 | CSAR_peak_! | 7.27              | - |
| chr1 | 25734481 | 25734517 | CSAR_peak_! | 8.39              | - |
| chr1 | 25734733 | 25734921 | CSAR_peak_! | 12.13,7.27,11.71  | - |
| chr1 | 25735743 | 25735819 | CSAR_peak_! | 9.58,7.27         | - |
| chr1 | 25736932 | 25737015 | CSAR_peak_! | 13.51,9.58        | - |
| chr1 | 25737453 | 25737509 | CSAR_peak_! | 14.88             | - |
| chr1 | 25778160 | 25778272 | CSAR_peak_! | 12.13,7.27        | - |
| chr1 | 25795180 | 25795256 | CSAR_peak_! | 7.92              | - |
| chr1 | 25795642 | 25795697 | CSAR_peak_! | 14.88,7.27        | - |
| chr1 | 25795781 | 25795857 | CSAR_peak_! | 12.13             | - |
| chr1 | 25836701 | 25836758 | CSAR_peak_! | 7.27,6.21         | - |
| chr1 | 25836980 | 25837031 | CSAR_peak_! | 7.27              | - |
| chr1 | 25872334 | 25872371 | CSAR_peak_! | 6.21              | - |
| chr1 | 25872645 | 25872750 | CSAR_peak_! | 6.03,29.2         | - |
| chr1 | 25872901 | 25873059 | CSAR_peak_! | 25.91,9.55,11.71  | - |
| chr1 | 25873091 | 25873134 | CSAR_peak_! | 7.27              | - |
| chr1 | 25873180 | 25873270 | CSAR_peak_! | 6.21              | - |
| chr1 | 25873932 | 25873969 | CSAR_peak_! | 10.83             | - |
| chr1 | 25874092 | 25874144 | CSAR_peak_! | 6.21              | - |
| chr1 | 25874615 | 25874670 | CSAR_peak_! | 7.58,9.77         | - |
| chr1 | 25874710 | 25874804 | CSAR_peak_! | 10.95             | - |
| chr1 | 25891228 | 25891269 | CSAR_peak_! | 7.27              | - |
| chr1 | 25910229 | 25910264 | CSAR_peak_! | 7.27              | - |
| chr1 | 25926963 | 25926983 | CSAR_peak_! | 11.71,29.48       | - |
| chr1 | 25927009 | 25927048 | CSAR_peak_! | 6.09              | - |
| chr1 | 25927066 | 25927130 | CSAR_peak_! | 41.21,20.07,11.71 | - |
| chr1 | 25927219 | 25927330 | CSAR_peak_! | 55.05,5.9,16.33   | - |
| chr1 | 25947566 | 25947619 | CSAR_peak_! | 8.14              | - |
| chr1 | 25969640 | 25969746 | CSAR_peak_! | 8.39              | - |
| chr1 | 26018627 | 26018699 | CSAR_peak_! | 12.13             | - |
| chr1 | 26018764 | 26018837 | CSAR_peak_! | 13.48             | - |
| chr1 | 26020485 | 26020571 | CSAR_peak_! | 10.95,5.86,6.09   | - |

|      |          |          |             |                 |
|------|----------|----------|-------------|-----------------|
| chr1 | 26020666 | 26020802 | CSAR_peak_1 | 12.13,16.33,-   |
| chr1 | 26020984 | 26021013 | CSAR_peak_1 | 6.85 -          |
| chr1 | 26021458 | 26021512 | CSAR_peak_1 | 9.77 -          |
| chr1 | 26021814 | 26021882 | CSAR_peak_1 | 11.66,13.48 -   |
| chr1 | 26022146 | 26022213 | CSAR_peak_1 | 8.39 -          |
| chr1 | 26022451 | 26022499 | CSAR_peak_1 | 9.58 -          |
| chr1 | 26024171 | 26024224 | CSAR_peak_1 | 7.27 -          |
| chr1 | 26024419 | 26024477 | CSAR_peak_1 | 9.77 -          |
| chr1 | 26025108 | 26025197 | CSAR_peak_1 | 24.21,6.44 -    |
| chr1 | 26025354 | 26025425 | CSAR_peak_1 | 9.58 -          |
| chr1 | 26025494 | 26025548 | CSAR_peak_1 | 16.33 -         |
| chr1 | 26050344 | 26050390 | CSAR_peak_1 | 12.13 -         |
| chr1 | 26050548 | 26050602 | CSAR_peak_1 | 6.21 -          |
| chr1 | 26051474 | 26051522 | CSAR_peak_1 | 7.58 -          |
| chr1 | 26054831 | 26054888 | CSAR_peak_1 | 9.58 -          |
| chr1 | 26055210 | 26055268 | CSAR_peak_1 | 16.33 -         |
| chr1 | 26056163 | 26056213 | CSAR_peak_1 | 8.39 -          |
| chr1 | 26056359 | 26056445 | CSAR_peak_1 | 33.31,21.24 -   |
| chr1 | 26056452 | 26056531 | CSAR_peak_1 | 11.38,19.98 -   |
| chr1 | 26056542 | 26056703 | CSAR_peak_1 | 18.95,7.27,8.-  |
| chr1 | 26056718 | 26056784 | CSAR_peak_1 | 7.27,17.65 -    |
| chr1 | 26057250 | 26057289 | CSAR_peak_1 | 6.03 -          |
| chr1 | 26057318 | 26057381 | CSAR_peak_1 | 10.83,24.21 -   |
| chr1 | 26057556 | 26057635 | CSAR_peak_1 | 9.77,16.05 -    |
| chr1 | 26057795 | 26057903 | CSAR_peak_1 | 16.33,13.48 -   |
| chr1 | 26107558 | 26107681 | CSAR_peak_1 | 13.51,5.86,14.- |
| chr1 | 26107908 | 26107976 | CSAR_peak_1 | 7.27,9.58 -     |
| chr1 | 26108054 | 26108113 | CSAR_peak_1 | 14.76,6.21,17.- |
| chr1 | 26108452 | 26108508 | CSAR_peak_1 | 8.39 -          |
| chr1 | 26108801 | 26108970 | CSAR_peak_1 | 27.64,12.13 -   |
| chr1 | 26109089 | 26109135 | CSAR_peak_1 | 7.27,16.11 -    |
| chr1 | 26109246 | 26109305 | CSAR_peak_1 | 10.83,9.58 -    |
| chr1 | 26109573 | 26109671 | CSAR_peak_1 | 7.27 -          |
| chr1 | 26109741 | 26109797 | CSAR_peak_1 | 8.39 -          |
| chr1 | 26112305 | 26112348 | CSAR_peak_1 | 6.21 -          |
| chr1 | 26112660 | 26112736 | CSAR_peak_1 | 9.58 -          |
| chr1 | 26112792 | 26112844 | CSAR_peak_1 | 7.27 -          |
| chr1 | 26148201 | 26148243 | CSAR_peak_1 | 6.21 -          |
| chr1 | 26152598 | 26152628 | CSAR_peak_1 | 6.21 -          |
| chr1 | 26152704 | 26152804 | CSAR_peak_1 | 9.58 -          |
| chr1 | 26161666 | 26161747 | CSAR_peak_1 | 19.36,12.13 -   |
| chr1 | 26161850 | 26162026 | CSAR_peak_1 | 25.91,39.92 -   |

|      |          |          |             |                |   |
|------|----------|----------|-------------|----------------|---|
| chr1 | 26162028 | 26162095 | CSAR_peak_! | 16.33          | - |
| chr1 | 26162407 | 26162483 | CSAR_peak_! | 12.31,13.85    | - |
| chr1 | 26162530 | 26162661 | CSAR_peak_! | 25.91,19.36    | - |
| chr1 | 26162675 | 26162744 | CSAR_peak_! | 7.27,10.83     | - |
| chr1 | 26163027 | 26163078 | CSAR_peak_! | 14.88,7.27     | - |
| chr1 | 26163095 | 26163162 | CSAR_peak_! | 8.39,9.58      | - |
| chr1 | 26239429 | 26239498 | CSAR_peak_! | 7.58,7.27      | - |
| chr1 | 26240086 | 26240331 | CSAR_peak_! | 47.42,12.13,;- |   |
| chr1 | 26240548 | 26240623 | CSAR_peak_! | 7.58,12.13     | - |
| chr1 | 26288553 | 26288609 | CSAR_peak_! | 11.96,9.61     | - |
| chr1 | 26288751 | 26288807 | CSAR_peak_! | 7.58           | - |
| chr1 | 26289028 | 26289077 | CSAR_peak_! | 14.88,10.31,;- |   |
| chr1 | 26289093 | 26289151 | CSAR_peak_! | 6.21           | - |
| chr1 | 26289232 | 26289400 | CSAR_peak_! | 12.17,21.53,;- |   |
| chr1 | 26289411 | 26289525 | CSAR_peak_! | 13.51,7.27     | - |
| chr1 | 26289566 | 26289641 | CSAR_peak_! | 11.66,17.82,;- |   |
| chr1 | 26289711 | 26289830 | CSAR_peak_! | 8.39,36.78,6.- |   |
| chr1 | 26289859 | 26290074 | CSAR_peak_! | 18.49,18.65,;- |   |
| chr1 | 26290176 | 26290245 | CSAR_peak_! | 14.88,6.95     | - |
| chr1 | 26290279 | 26290372 | CSAR_peak_! | 25.91,37.82    | - |
| chr1 | 26290376 | 26290762 | CSAR_peak_! | 19.98,13.29,;- |   |
| chr1 | 26290884 | 26290995 | CSAR_peak_! | 12.17,13.48    | - |
| chr1 | 26291120 | 26291168 | CSAR_peak_! | 25.91          | - |
| chr1 | 26291243 | 26291609 | CSAR_peak_! | 57.16,8.13,2:- |   |
| chr1 | 26291681 | 26291709 | CSAR_peak_! | 23.89          | - |
| chr1 | 26291710 | 26291767 | CSAR_peak_! | 5.86           | - |
| chr1 | 26291887 | 26291971 | CSAR_peak_! | 47.42,11.16    | - |
| chr1 | 26292003 | 26292150 | CSAR_peak_! | 16.33,25.62,;- |   |
| chr1 | 26292160 | 26292239 | CSAR_peak_! | 27.11,37.04    | - |
| chr1 | 26292288 | 26292359 | CSAR_peak_! | 28.34,27.11    | - |
| chr1 | 26292439 | 26292485 | CSAR_peak_! | 8.92           | - |
| chr1 | 26292513 | 26292598 | CSAR_peak_! | 9.48,12.74,5.- |   |
| chr1 | 26292701 | 26292877 | CSAR_peak_! | 5.62,12.17,1:- |   |
| chr1 | 26292897 | 26292970 | CSAR_peak_! | 25.07          | - |
| chr1 | 26294239 | 26294294 | CSAR_peak_! | 11.38          | - |
| chr1 | 26294381 | 26294478 | CSAR_peak_! | 55.05,13.92,;- |   |
| chr1 | 26294581 | 26294673 | CSAR_peak_! | 60.02,62.52    | - |
| chr1 | 26294776 | 26294834 | CSAR_peak_! | 7.27           | - |
| chr1 | 26294962 | 26295080 | CSAR_peak_! | 16.25,16.05    | - |
| chr1 | 26295104 | 26295177 | CSAR_peak_! | 10.31          | - |
| chr1 | 26295336 | 26295458 | CSAR_peak_! | 8.39,16.33     | - |
| chr1 | 26297807 | 26297877 | CSAR_peak_! | 9.41,7.58      | - |

|      |          |          |             |               |   |
|------|----------|----------|-------------|---------------|---|
| chr1 | 26323264 | 26323404 | CSAR_peak_! | 33.03,24.21   | - |
| chr1 | 26323518 | 26323627 | CSAR_peak_! | 11.99,19.96   | - |
| chr1 | 26323644 | 26323786 | CSAR_peak_! | 16.23,26.8,7. | - |
| chr1 | 26323923 | 26324041 | CSAR_peak_! | 23.03,25.91   | - |
| chr1 | 26324105 | 26324270 | CSAR_peak_! | 21.94,17.82,! | - |
| chr1 | 26324364 | 26324516 | CSAR_peak_! | 20.02,23.93   | - |
| chr1 | 26324520 | 26324573 | CSAR_peak_! | 7.27          | - |
| chr1 | 26327457 | 26327542 | CSAR_peak_! | 7.27,6.21     | - |
| chr1 | 26348944 | 26349091 | CSAR_peak_! | 6.21,7.27,12. | - |
| chr1 | 26350418 | 26350477 | CSAR_peak_! | 12.13         | - |
| chr1 | 26350490 | 26350530 | CSAR_peak_! | 13.48         | - |
| chr1 | 26364347 | 26364394 | CSAR_peak_! | 7.27          | - |
| chr1 | 26391135 | 26391165 | CSAR_peak_! | 7.27          | - |
| chr1 | 26391338 | 26391442 | CSAR_peak_! | 17.82,17.82   | - |
| chr1 | 26391570 | 26391668 | CSAR_peak_! | 9.58,7.58     | - |
| chr1 | 26392157 | 26392201 | CSAR_peak_! | 9.58          | - |
| chr1 | 26392765 | 26392781 | CSAR_peak_! | 6.03          | - |
| chr1 | 26392990 | 26393036 | CSAR_peak_! | 16.11         | - |
| chr1 | 26410163 | 26410233 | CSAR_peak_! | 7.27,7.27     | - |
| chr1 | 26467340 | 26467395 | CSAR_peak_! | 7.26          | - |
| chr1 | 26471009 | 26471064 | CSAR_peak_! | 15            | - |
| chr1 | 26471202 | 26471309 | CSAR_peak_! | 17.82,12.13   | - |
| chr1 | 26471353 | 26471406 | CSAR_peak_! | 10.95         | - |
| chr1 | 26471435 | 26471525 | CSAR_peak_! | 10.94,42.87   | - |
| chr1 | 26471573 | 26471713 | CSAR_peak_! | 17.82,9.58,1! | - |
| chr1 | 26471757 | 26471858 | CSAR_peak_! | 13.85,29.2    | - |
| chr1 | 26471861 | 26471911 | CSAR_peak_! | 7.77          | - |
| chr1 | 26472003 | 26472275 | CSAR_peak_! | 12.59,35.33,! | - |
| chr1 | 26472383 | 26472633 | CSAR_peak_! | 6.03,39.3,37. | - |
| chr1 | 26472679 | 26472884 | CSAR_peak_! | 37.82,30.21   | - |
| chr1 | 26472927 | 26473277 | CSAR_peak_! | 23.41,34.26,! | - |
| chr1 | 26473288 | 26473385 | CSAR_peak_! | 42.33,44.49   | - |
| chr1 | 26473464 | 26473655 | CSAR_peak_! | 19.36,13.85   | - |
| chr1 | 26473698 | 26473756 | CSAR_peak_! | 7.27,6.21     | - |
| chr1 | 26473797 | 26474016 | CSAR_peak_! | 14.76,18.65,! | - |
| chr1 | 26474070 | 26474129 | CSAR_peak_! | 13.44,11.38   | - |
| chr1 | 26474188 | 26474291 | CSAR_peak_! | 8.39,6.21     | - |
| chr1 | 26474550 | 26474620 | CSAR_peak_! | 31.2,16.25    | - |
| chr1 | 26478180 | 26478242 | CSAR_peak_! | 7.27          | - |
| chr1 | 26478411 | 26478491 | CSAR_peak_! | 8.65,6.03     | - |
| chr1 | 26479373 | 26479428 | CSAR_peak_! | 12.17         | - |
| chr1 | 26479631 | 26479705 | CSAR_peak_! | 12.17         | - |



|      |          |          |             |                |   |
|------|----------|----------|-------------|----------------|---|
| chr1 | 26480615 | 26480681 | CSAR_peak_! | 8.39           | - |
| chr1 | 26481072 | 26481116 | CSAR_peak_! | 9.58           | - |
| chr1 | 26481200 | 26481246 | CSAR_peak_! | 13.48          | - |
| chr1 | 26485867 | 26485922 | CSAR_peak_! | 9.58,9.58      | - |
| chr1 | 26486464 | 26486502 | CSAR_peak_! | 6.81           | - |
| chr1 | 26487304 | 26487340 | CSAR_peak_! | 8.39           | - |
| chr1 | 26488919 | 26488967 | CSAR_peak_! | 8.95,7.27      | - |
| chr1 | 26489537 | 26489596 | CSAR_peak_! | 14.76          | - |
| chr1 | 26489685 | 26489766 | CSAR_peak_! | 25.08,24.72    | - |
| chr1 | 26489877 | 26489964 | CSAR_peak_! | 13.85,10.83    | - |
| chr1 | 26489986 | 26490024 | CSAR_peak_! | 6.21           | - |
| chr1 | 26490106 | 26490143 | CSAR_peak_! | 7.27           | - |
| chr1 | 26490230 | 26490332 | CSAR_peak_! | 24.21          | - |
| chr1 | 26490419 | 26490522 | CSAR_peak_! | 9.58,9.58      | - |
| chr1 | 26490867 | 26490946 | CSAR_peak_! | 10.83,6.57     | - |
| chr1 | 26491140 | 26491178 | CSAR_peak_! | 7.58           | - |
| chr1 | 26491182 | 26491214 | CSAR_peak_! | 6.03           | - |
| chr1 | 26491372 | 26491419 | CSAR_peak_! | 7.27           | - |
| chr1 | 26491459 | 26491556 | CSAR_peak_! | 18.73          | - |
| chr1 | 26491793 | 26491839 | CSAR_peak_! | 7.27           | - |
| chr1 | 26491867 | 26491961 | CSAR_peak_! | 14.88,19.21    | - |
| chr1 | 26492520 | 26492558 | CSAR_peak_! | 5.86           | - |
| chr1 | 26492830 | 26492871 | CSAR_peak_! | 6.21           | - |
| chr1 | 26493088 | 26493148 | CSAR_peak_! | 12.13,20.94    | - |
| chr1 | 26493401 | 26493436 | CSAR_peak_! | 12.31,9.58     | - |
| chr1 | 26493455 | 26493533 | CSAR_peak_! | 10.83,9.58     | - |
| chr1 | 26493673 | 26493724 | CSAR_peak_! | 7.27           | - |
| chr1 | 26494154 | 26494200 | CSAR_peak_! | 7.27           | - |
| chr1 | 26494224 | 26494542 | CSAR_peak_! | 11.38,23.03,,- | - |
| chr1 | 26494564 | 26494634 | CSAR_peak_! | 31.2,9.58      | - |
| chr1 | 26494754 | 26494806 | CSAR_peak_! | 7.27           | - |
| chr1 | 26495126 | 26495192 | CSAR_peak_! | 6.21           | - |
| chr1 | 26495197 | 26495261 | CSAR_peak_! | 18.95,14.34    | - |
| chr1 | 26495437 | 26495540 | CSAR_peak_! | 8.95,20.43     | - |
| chr1 | 26495899 | 26495940 | CSAR_peak_! | 9.58           | - |
| chr1 | 26496408 | 26496521 | CSAR_peak_! | 6.21           | - |
| chr1 | 26496919 | 26497010 | CSAR_peak_! | 12.31,7.26     | - |
| chr1 | 26498727 | 26498783 | CSAR_peak_! | 9.58           | - |
| chr1 | 26499426 | 26499503 | CSAR_peak_! | 9.58           | - |
| chr1 | 26500945 | 26500995 | CSAR_peak_! | 9.58,9.58      | - |
| chr1 | 26501249 | 26501287 | CSAR_peak_! | 6.21           | - |
| chr1 | 26513008 | 26513062 | CSAR_peak_! | 9.58           | - |

|      |          |          |             |                |
|------|----------|----------|-------------|----------------|
| chr1 | 26513235 | 26513372 | CSAR_peak_! | 12.13,12.17,;- |
| chr1 | 26513385 | 26513459 | CSAR_peak_! | 7.27,7.27 -    |
| chr1 | 26513642 | 26513701 | CSAR_peak_! | 6.03,8.39 -    |
| chr1 | 26534135 | 26534170 | CSAR_peak_! | 7.27 -         |
| chr1 | 26534188 | 26534259 | CSAR_peak_! | 10.83,7.27 -   |
| chr1 | 26534292 | 26534346 | CSAR_peak_! | 9.97 -         |
| chr1 | 26534412 | 26534523 | CSAR_peak_! | 25.08,11.34 -  |
| chr1 | 26534713 | 26534755 | CSAR_peak_! | 6.95 -         |
| chr1 | 26535151 | 26535224 | CSAR_peak_! | 29.43,12.31 -  |
| chr1 | 26535285 | 26535298 | CSAR_peak_! | 8.13 -         |
| chr1 | 26536046 | 26536183 | CSAR_peak_! | 17.37,6.21,7.- |
| chr1 | 26536453 | 26536484 | CSAR_peak_! | 8.9,8.95 -     |
| chr1 | 26536504 | 26536546 | CSAR_peak_! | 14.88 -        |
| chr1 | 26539424 | 26539463 | CSAR_peak_! | 6.21 -         |
| chr1 | 26539905 | 26540035 | CSAR_peak_! | 13.84,7.73,2(- |
| chr1 | 26540173 | 26540230 | CSAR_peak_! | 16.33,20.94 -  |
| chr1 | 26540399 | 26540437 | CSAR_peak_! | 6.21 -         |
| chr1 | 26540451 | 26540605 | CSAR_peak_! | 21.94,20.94 -  |
| chr1 | 26564840 | 26564905 | CSAR_peak_! | 6.57,12.13 -   |
| chr1 | 26585074 | 26585132 | CSAR_peak_! | 7.27 -         |
| chr1 | 26585426 | 26585448 | CSAR_peak_! | 7.27 -         |
| chr1 | 26585530 | 26585588 | CSAR_peak_! | 8.39,12.13 -   |
| chr1 | 26585691 | 26585736 | CSAR_peak_! | 6.03 -         |
| chr1 | 26585738 | 26585769 | CSAR_peak_! | 9.58 -         |
| chr1 | 26586157 | 26586235 | CSAR_peak_! | 15.9,33.31 -   |
| chr1 | 26586281 | 26586297 | CSAR_peak_! | 7.92 -         |
| chr1 | 26586378 | 26586434 | CSAR_peak_! | 14.88,6.21 -   |
| chr1 | 26586819 | 26586970 | CSAR_peak_! | 7.68,17.82 -   |
| chr1 | 26588577 | 26588701 | CSAR_peak_! | 14.88,9.58 -   |
| chr1 | 26588871 | 26588931 | CSAR_peak_! | 9.58 -         |
| chr1 | 26588950 | 26589086 | CSAR_peak_! | 16.33,10.02 -  |
| chr1 | 26589168 | 26589340 | CSAR_peak_! | 10.83,17.82,;- |
| chr1 | 26589393 | 26589481 | CSAR_peak_! | 9.58,29.4 -    |
| chr1 | 26589556 | 26589636 | CSAR_peak_! | 9.77,12.13 -   |
| chr1 | 26590035 | 26590122 | CSAR_peak_! | 8.39,8.9 -     |
| chr1 | 26590585 | 26590664 | CSAR_peak_! | 7.27 -         |
| chr1 | 26590667 | 26590752 | CSAR_peak_! | 12.13,9.03 -   |
| chr1 | 26590775 | 26590817 | CSAR_peak_! | 7.31,8.39 -    |
| chr1 | 26590828 | 26590889 | CSAR_peak_! | 11.38,9.77 -   |
| chr1 | 26591146 | 26591200 | CSAR_peak_! | 6.21 -         |
| chr1 | 26621012 | 26621062 | CSAR_peak_! | 9.58 -         |
| chr1 | 26621556 | 26621602 | CSAR_peak_! | 9.77 -         |

|      |          |          |             |                 |   |
|------|----------|----------|-------------|-----------------|---|
| chr1 | 26669188 | 26669305 | CSAR_peak_1 | 8.39,14.88      | - |
| chr1 | 26669486 | 26669530 | CSAR_peak_1 | 6.21            | - |
| chr1 | 26669656 | 26669690 | CSAR_peak_1 | 13.66           | - |
| chr1 | 26669778 | 26669816 | CSAR_peak_1 | 13.51           | - |
| chr1 | 26669819 | 26669892 | CSAR_peak_1 | 7.27            | - |
| chr1 | 26670114 | 26670118 | CSAR_peak_1 | 6.95            | - |
| chr1 | 26670585 | 26670655 | CSAR_peak_1 | 24.21,5.86      | - |
| chr1 | 26670884 | 26670946 | CSAR_peak_1 | 12.72,6.85      | - |
| chr1 | 26671292 | 26671375 | CSAR_peak_1 | 9.27            | - |
| chr1 | 26671489 | 26671598 | CSAR_peak_1 | 22.56,14.88     | - |
| chr1 | 26671744 | 26671854 | CSAR_peak_1 | 10.94,12.31,1(- | - |
| chr1 | 26673975 | 26674082 | CSAR_peak_1 | 7.27,6.03       | - |
| chr1 | 26674170 | 26674307 | CSAR_peak_1 | 36.78,20.18     | - |
| chr1 | 26674411 | 26674510 | CSAR_peak_1 | 10.62           | - |
| chr1 | 26674707 | 26674774 | CSAR_peak_1 | 7.27            | - |
| chr1 | 26674836 | 26674933 | CSAR_peak_1 | 6.03,6.44       | - |
| chr1 | 26680920 | 26680971 | CSAR_peak_1 | 5.86            | - |
| chr1 | 26681090 | 26681160 | CSAR_peak_1 | 8.39            | - |
| chr1 | 26681267 | 26681362 | CSAR_peak_1 | 17.51,10.83     | - |
| chr1 | 26681406 | 26681573 | CSAR_peak_1 | 6.81            | - |
| chr1 | 26682238 | 26682276 | CSAR_peak_1 | 8.39            | - |
| chr1 | 26687920 | 26687966 | CSAR_peak_1 | 6.21            | - |
| chr1 | 26688647 | 26688730 | CSAR_peak_1 | 7.58            | - |
| chr1 | 26689302 | 26689341 | CSAR_peak_1 | 9.58            | - |
| chr1 | 26689836 | 26689864 | CSAR_peak_1 | 9.58            | - |
| chr1 | 26689970 | 26690032 | CSAR_peak_1 | 6.21            | - |
| chr1 | 26691107 | 26691145 | CSAR_peak_1 | 6.21            | - |
| chr1 | 26695513 | 26695551 | CSAR_peak_1 | 22.56,7.34      | - |
| chr1 | 26695590 | 26695919 | CSAR_peak_1 | 42.64,34.16,1(- | - |
| chr1 | 26695945 | 26696036 | CSAR_peak_1 | 17.82,12.13     | - |
| chr1 | 26696208 | 26696285 | CSAR_peak_1 | 12.17,6.94      | - |
| chr1 | 26711187 | 26711233 | CSAR_peak_1 | 7.27            | - |
| chr1 | 26715278 | 26715342 | CSAR_peak_1 | 16.11,6.03      | - |
| chr1 | 26715571 | 26715614 | CSAR_peak_1 | 7.27            | - |
| chr1 | 26715708 | 26715790 | CSAR_peak_1 | 11.03,9.58,1(-  | - |
| chr1 | 26715936 | 26716086 | CSAR_peak_1 | 26.43,11.07     | - |
| chr1 | 26716134 | 26716176 | CSAR_peak_1 | 12.13           | - |
| chr1 | 26716183 | 26716344 | CSAR_peak_1 | 12.54,9.02,1(-  | - |
| chr1 | 26716383 | 26716456 | CSAR_peak_1 | 8.2,6.57        | - |
| chr1 | 26716543 | 26716696 | CSAR_peak_1 | 18.61,19.98     | - |
| chr1 | 26725771 | 26725852 | CSAR_peak_1 | 10.83           | - |
| chr1 | 26726166 | 26726233 | CSAR_peak_1 | 11.38,6.21      | - |

|      |          |          |             |                |   |
|------|----------|----------|-------------|----------------|---|
| chr1 | 26790876 | 26790929 | CSAR_peak_! | 13.48,6.21     | - |
| chr1 | 26790988 | 26791080 | CSAR_peak_! | 14.88,19.36    | - |
| chr1 | 26791660 | 26791706 | CSAR_peak_! | 9.58           | - |
| chr1 | 26791847 | 26791914 | CSAR_peak_! | 12.13,17.82    | - |
| chr1 | 26792004 | 26792022 | CSAR_peak_! | 7.58           | - |
| chr1 | 26792090 | 26792147 | CSAR_peak_! | 23.03,9.41     | - |
| chr1 | 26792252 | 26792348 | CSAR_peak_! | 10.83,9.43     | - |
| chr1 | 26792349 | 26792391 | CSAR_peak_! | 7,8.28,7.26    | - |
| chr1 | 26792482 | 26792555 | CSAR_peak_! | 19.36,6.57     | - |
| chr1 | 26792579 | 26792629 | CSAR_peak_! | 28.34,9.77     | - |
| chr1 | 26792852 | 26792948 | CSAR_peak_! | 17.82          | - |
| chr1 | 26793002 | 26793049 | CSAR_peak_! | 9.58           | - |
| chr1 | 26793189 | 26793233 | CSAR_peak_! | 8.39           | - |
| chr1 | 26794175 | 26794201 | CSAR_peak_! | 7.27           | - |
| chr1 | 26794231 | 26794287 | CSAR_peak_! | 14.08,17.82    | - |
| chr1 | 26794638 | 26794737 | CSAR_peak_! | 7.58,5.86,38.- | - |
| chr1 | 26794975 | 26795019 | CSAR_peak_! | 7.27           | - |
| chr1 | 26795278 | 26795330 | CSAR_peak_! | 30.81          | - |
| chr1 | 26795500 | 26795667 | CSAR_peak_! | 38.71,22.56    | - |
| chr1 | 26795675 | 26795869 | CSAR_peak_! | 24.97,10.82,-  | - |
| chr1 | 26795890 | 26796117 | CSAR_peak_! | 16.11,26.69,-  | - |
| chr1 | 26796187 | 26796248 | CSAR_peak_! | 16.11,13.44    | - |
| chr1 | 26797134 | 26797179 | CSAR_peak_! | 6.21           | - |
| chr1 | 26797345 | 26797390 | CSAR_peak_! | 9.58           | - |
| chr1 | 26797414 | 26797550 | CSAR_peak_! | 21.22          | - |
| chr1 | 26797626 | 26797676 | CSAR_peak_! | 7.92,6.03      | - |
| chr1 | 26800132 | 26800181 | CSAR_peak_! | 9.58           | - |
| chr1 | 26807511 | 26807565 | CSAR_peak_! | 16.33          | - |
| chr1 | 26807596 | 26807673 | CSAR_peak_! | 9.58,8.39      | - |
| chr1 | 26807924 | 26808002 | CSAR_peak_! | 14.88,5.86     | - |
| chr1 | 26808786 | 26808817 | CSAR_peak_! | 7.27           | - |
| chr1 | 26833498 | 26833558 | CSAR_peak_! | 6.21           | - |
| chr1 | 26833672 | 26833688 | CSAR_peak_! | 12.13          | - |
| chr1 | 26833780 | 26833805 | CSAR_peak_! | 14.88          | - |
| chr1 | 26885806 | 26885844 | CSAR_peak_! | 7.58           | - |
| chr1 | 26885878 | 26885951 | CSAR_peak_! | 13.48,12.13    | - |
| chr1 | 26886005 | 26886085 | CSAR_peak_! | 17.4,20.94     | - |
| chr1 | 26886559 | 26886625 | CSAR_peak_! | 12.31,12.17    | - |
| chr1 | 26914616 | 26914651 | CSAR_peak_! | 6.21           | - |
| chr1 | 26916366 | 26916382 | CSAR_peak_! | 6.21           | - |
| chr1 | 26916455 | 26916573 | CSAR_peak_! | 17.82,7.58     | - |
| chr1 | 26916643 | 26916724 | CSAR_peak_! | 10.95,6.21     | - |

|      |          |          |             |                   |   |
|------|----------|----------|-------------|-------------------|---|
| chr1 | 26917024 | 26917088 | CSAR_peak_! | 30.02,16.33       | - |
| chr1 | 26917399 | 26917456 | CSAR_peak_! | 6.21              | - |
| chr1 | 26918172 | 26918290 | CSAR_peak_! | 9.58              | - |
| chr1 | 26921832 | 26921891 | CSAR_peak_! | 7.27              | - |
| chr1 | 26923424 | 26923473 | CSAR_peak_! | 16.33             | - |
| chr1 | 26973807 | 26973857 | CSAR_peak_! | 8.39              | - |
| chr1 | 26974620 | 26974672 | CSAR_peak_! | 6.21              | - |
| chr1 | 26974681 | 26974753 | CSAR_peak_! | 24.21,7.92        | - |
| chr1 | 26974797 | 26974884 | CSAR_peak_! | 7.27,25.34,14.88  | - |
| chr1 | 26974909 | 26975044 | CSAR_peak_! | 13.48,9.58        | - |
| chr1 | 26975112 | 26975200 | CSAR_peak_! | 14.88,7.92        | - |
| chr1 | 26975371 | 26975480 | CSAR_peak_! | 16.78,8.14        | - |
| chr1 | 26975536 | 26975656 | CSAR_peak_! | 14.88,12.13       | - |
| chr1 | 26975788 | 26975890 | CSAR_peak_! | 6.21,12.74        | - |
| chr1 | 26976024 | 26976090 | CSAR_peak_! | 17.82,9.77        | - |
| chr1 | 26976487 | 26976626 | CSAR_peak_! | 8.14,21.11,14.88  | - |
| chr1 | 26976718 | 26976765 | CSAR_peak_! | 8.39,12.13        | - |
| chr1 | 27003134 | 27003170 | CSAR_peak_! | 6.21              | - |
| chr1 | 27006092 | 27006142 | CSAR_peak_! | 8.65,9.58         | - |
| chr1 | 27078910 | 27079057 | CSAR_peak_! | 7.34,12.17,6.21   | - |
| chr1 | 27079705 | 27079774 | CSAR_peak_! | 20.43             | - |
| chr1 | 27080367 | 27080406 | CSAR_peak_! | 6.21              | - |
| chr1 | 27080512 | 27080569 | CSAR_peak_! | 6.45              | - |
| chr1 | 27080889 | 27080961 | CSAR_peak_! | 31.2              | - |
| chr1 | 27081035 | 27081087 | CSAR_peak_! | 9.58              | - |
| chr1 | 27081242 | 27081300 | CSAR_peak_! | 6.95              | - |
| chr1 | 27081381 | 27081510 | CSAR_peak_! | 9.77,31.2,8.5     | - |
| chr1 | 27087133 | 27087193 | CSAR_peak_! | 7.27              | - |
| chr1 | 27154062 | 27154072 | CSAR_peak_! | 6.02              | - |
| chr1 | 27154194 | 27154247 | CSAR_peak_! | 12.13,17.82       | - |
| chr1 | 27154301 | 27154359 | CSAR_peak_! | 7.27              | - |
| chr1 | 27155384 | 27155405 | CSAR_peak_! | 6.21              | - |
| chr1 | 27168350 | 27168429 | CSAR_peak_! | 12.13,9.77        | - |
| chr1 | 27228331 | 27228376 | CSAR_peak_! | 6.21              | - |
| chr1 | 27232403 | 27232527 | CSAR_peak_! | 7.27              | - |
| chr1 | 27243896 | 27243962 | CSAR_peak_! | 13.48,12.13       | - |
| chr1 | 27258981 | 27259069 | CSAR_peak_! | 28.94,17.68       | - |
| chr1 | 27259075 | 27259122 | CSAR_peak_! | 7.27              | - |
| chr1 | 27259221 | 27259270 | CSAR_peak_! | 7.92,10.31        | - |
| chr1 | 27259272 | 27259401 | CSAR_peak_! | 15.68,16.22,14.88 | - |
| chr1 | 27259414 | 27259483 | CSAR_peak_! | 6.21,10.83,21.26  | - |
| chr1 | 27259522 | 27259648 | CSAR_peak_! | 21.26,10.82,14.88 | - |

|      |          |          |             |                  |   |
|------|----------|----------|-------------|------------------|---|
| chr1 | 27259678 | 27259752 | CSAR_peak_1 | 18.97,18.61      | - |
| chr1 | 27259831 | 27259934 | CSAR_peak_1 | 10.33,10.96      | - |
| chr1 | 27260020 | 27260094 | CSAR_peak_1 | 21.37,39.3       | - |
| chr1 | 27262782 | 27262837 | CSAR_peak_1 | 13.48            | - |
| chr1 | 27268366 | 27268690 | CSAR_peak_1 | 16.98,8.28,14.8  | - |
| chr1 | 27268726 | 27268908 | CSAR_peak_1 | 7.31,9.25,12.1   | - |
| chr1 | 27269103 | 27269171 | CSAR_peak_1 | 13.48            | - |
| chr1 | 27269198 | 27269339 | CSAR_peak_1 | 8.39             | - |
| chr1 | 27269514 | 27269554 | CSAR_peak_1 | 6.21             | - |
| chr1 | 27269671 | 27269709 | CSAR_peak_1 | 9.58             | - |
| chr1 | 27269714 | 27269865 | CSAR_peak_1 | 8.95,17.82,6.1   | - |
| chr1 | 27270196 | 27270306 | CSAR_peak_1 | 9.58,20.43       | - |
| chr1 | 27270440 | 27270479 | CSAR_peak_1 | 7.27             | - |
| chr1 | 27270543 | 27270778 | CSAR_peak_1 | 9.55,6.21,16.1   | - |
| chr1 | 27270799 | 27270895 | CSAR_peak_1 | 7.58,6.81,9.5    | - |
| chr1 | 27270967 | 27271132 | CSAR_peak_1 | 10.83,7.27       | - |
| chr1 | 27271372 | 27271431 | CSAR_peak_1 | 10.83            | - |
| chr1 | 27271649 | 27271721 | CSAR_peak_1 | 14.88,10.94      | - |
| chr1 | 27271818 | 27271907 | CSAR_peak_1 | 27.11,19.98      | - |
| chr1 | 27271995 | 27272064 | CSAR_peak_1 | 30.81,8.2,16.1   | - |
| chr1 | 27272087 | 27272140 | CSAR_peak_1 | 14.76,8.2,5.8    | - |
| chr1 | 27272292 | 27272440 | CSAR_peak_1 | 8.14,19.36,11.1  | - |
| chr1 | 27272489 | 27272619 | CSAR_peak_1 | 10.83,13.51,11.1 | - |
| chr1 | 27272816 | 27272865 | CSAR_peak_1 | 7.27             | - |
| chr1 | 27272870 | 27272993 | CSAR_peak_1 | 9.77,10.83,9.1   | - |
| chr1 | 27273051 | 27273144 | CSAR_peak_1 | 17.65            | - |
| chr1 | 27273160 | 27273262 | CSAR_peak_1 | 9.58,10.83       | - |
| chr1 | 27273295 | 27273347 | CSAR_peak_1 | 25.91,5.79       | - |
| chr1 | 27273350 | 27273411 | CSAR_peak_1 | 17.65            | - |
| chr1 | 27273524 | 27273590 | CSAR_peak_1 | 16.33,12.13      | - |
| chr1 | 27273815 | 27273976 | CSAR_peak_1 | 30.02,26.69      | - |
| chr1 | 27274045 | 27274094 | CSAR_peak_1 | 9.58             | - |
| chr1 | 27274115 | 27274162 | CSAR_peak_1 | 6.21             | - |
| chr1 | 27274185 | 27274238 | CSAR_peak_1 | 9.58             | - |
| chr1 | 27274269 | 27274616 | CSAR_peak_1 | 13.66,24.21,11.1 | - |
| chr1 | 27274688 | 27274769 | CSAR_peak_1 | 19.93,17.84      | - |
| chr1 | 27274775 | 27274823 | CSAR_peak_1 | 9.58             | - |
| chr1 | 27274831 | 27274934 | CSAR_peak_1 | 14.76,19.98      | - |
| chr1 | 27274973 | 27275258 | CSAR_peak_1 | 24.72,30.25      | - |
| chr1 | 27275346 | 27275506 | CSAR_peak_1 | 66.03,50.81,11.1 | - |
| chr1 | 27275511 | 27275741 | CSAR_peak_1 | 76.63,5.86,51.1  | - |
| chr1 | 27275967 | 27276052 | CSAR_peak_1 | 24.74,42.97      | - |

|      |          |          |             |                |   |
|------|----------|----------|-------------|----------------|---|
| chr1 | 27276058 | 27276200 | CSAR_peak_1 | 26.27,30.72    | - |
| chr1 | 27296481 | 27296531 | CSAR_peak_1 | 12.13          | - |
| chr1 | 27297048 | 27297119 | CSAR_peak_1 | 5.86,6.21      | - |
| chr1 | 27320870 | 27320955 | CSAR_peak_1 | 19.36          | - |
| chr1 | 27327361 | 27327412 | CSAR_peak_1 | 6.02,6.21      | - |
| chr1 | 27327526 | 27327593 | CSAR_peak_1 | 6.03,14.76     | - |
| chr1 | 27339280 | 27339342 | CSAR_peak_1 | 16.33          | - |
| chr1 | 27339513 | 27339563 | CSAR_peak_1 | 6.21           | - |
| chr1 | 27339676 | 27339796 | CSAR_peak_1 | 17.37,12.74    | - |
| chr1 | 27339813 | 27339884 | CSAR_peak_1 | 16.77,6.02     | - |
| chr1 | 27346389 | 27346434 | CSAR_peak_1 | 8.39           | - |
| chr1 | 27346749 | 27346812 | CSAR_peak_1 | 6.21,7.27      | - |
| chr1 | 27347585 | 27347659 | CSAR_peak_1 | 9.55           | - |
| chr1 | 27406597 | 27406646 | CSAR_peak_1 | 6.21           | - |
| chr1 | 27411857 | 27411905 | CSAR_peak_1 | 7.27           | - |
| chr1 | 27413832 | 27413896 | CSAR_peak_1 | 8.39           | - |
| chr1 | 27423957 | 27424007 | CSAR_peak_1 | 9.58           | - |
| chr1 | 27424164 | 27424215 | CSAR_peak_1 | 9.58           | - |
| chr1 | 27460153 | 27460166 | CSAR_peak_1 | 9.58,7.27      | - |
| chr1 | 27460464 | 27460506 | CSAR_peak_1 | 10.02,12.13    | - |
| chr1 | 27464917 | 27465001 | CSAR_peak_1 | 20.13,10.83    | - |
| chr1 | 27465432 | 27465506 | CSAR_peak_1 | 14.88,6.21     | - |
| chr1 | 27465812 | 27465851 | CSAR_peak_1 | 7.27           | - |
| chr1 | 27471037 | 27471103 | CSAR_peak_1 | 8.2,13.85      | - |
| chr1 | 27472274 | 27472311 | CSAR_peak_1 | 7.27           | - |
| chr1 | 27494859 | 27494950 | CSAR_peak_1 | 10.83,8.65     | - |
| chr1 | 27495044 | 27495096 | CSAR_peak_1 | 14.76          | - |
| chr1 | 27495716 | 27495755 | CSAR_peak_1 | 12.17          | - |
| chr1 | 27496102 | 27496149 | CSAR_peak_1 | 12.13          | - |
| chr1 | 27496305 | 27496425 | CSAR_peak_1 | 9.58,18.73     | - |
| chr1 | 27496502 | 27496643 | CSAR_peak_1 | 14.88,5.86,8.- | - |
| chr1 | 27511955 | 27512008 | CSAR_peak_1 | 9.77           | - |
| chr1 | 27512124 | 27512236 | CSAR_peak_1 | 6.85,16.11     | - |
| chr1 | 27512418 | 27512471 | CSAR_peak_1 | 6.57           | - |
| chr1 | 27512784 | 27512810 | CSAR_peak_1 | 7.27           | - |
| chr1 | 27513818 | 27513847 | CSAR_peak_1 | 10.83          | - |
| chr1 | 27522239 | 27522329 | CSAR_peak_1 | 8.39,10.83     | - |
| chr1 | 27523449 | 27523660 | CSAR_peak_1 | 12.27,14.22,-  | - |
| chr1 | 27523773 | 27523947 | CSAR_peak_1 | 22.56,20.94    | - |
| chr1 | 27524020 | 27524070 | CSAR_peak_1 | 8.39,6.21      | - |
| chr1 | 27524505 | 27524582 | CSAR_peak_1 | 25.91          | - |
| chr1 | 27524722 | 27524788 | CSAR_peak_1 | 5.86,10.83     | - |

|      |          |          |            |               |   |
|------|----------|----------|------------|---------------|---|
| chr1 | 27524901 | 27524971 | CSAR_peak_ | 5.86          | - |
| chr1 | 27525057 | 27525089 | CSAR_peak_ | 8.39          | - |
| chr1 | 27525144 | 27525273 | CSAR_peak_ | 12.13,19.36,  | - |
| chr1 | 27525283 | 27525388 | CSAR_peak_ | 7.27          | - |
| chr1 | 27526111 | 27526150 | CSAR_peak_ | 7.27          | - |
| chr1 | 27529550 | 27529609 | CSAR_peak_ | 9.58          | - |
| chr1 | 27540641 | 27540691 | CSAR_peak_ | 9.58,6.03     | - |
| chr1 | 27544364 | 27544431 | CSAR_peak_ | 8.39,7.27     | - |
| chr1 | 27545386 | 27545411 | CSAR_peak_ | 5.86          | - |
| chr1 | 27546339 | 27546386 | CSAR_peak_ | 10.83,12.13   | - |
| chr1 | 27547074 | 27547135 | CSAR_peak_ | 10.83         | - |
| chr1 | 27547491 | 27547538 | CSAR_peak_ | 14.88         | - |
| chr1 | 27547559 | 27547669 | CSAR_peak_ | 9.58,8.39     | - |
| chr1 | 27547710 | 27547773 | CSAR_peak_ | 10.83,7.27    | - |
| chr1 | 27550812 | 27550855 | CSAR_peak_ | 7.27          | - |
| chr1 | 27553168 | 27553188 | CSAR_peak_ | 6.21          | - |
| chr1 | 27559975 | 27560029 | CSAR_peak_ | 7.27          | - |
| chr1 | 27560854 | 27560891 | CSAR_peak_ | 10.83         | - |
| chr1 | 27562772 | 27562833 | CSAR_peak_ | 13.48         | - |
| chr1 | 27563155 | 27563200 | CSAR_peak_ | 7.27          | - |
| chr1 | 27563905 | 27563946 | CSAR_peak_ | 27.64         | - |
| chr1 | 27564022 | 27564122 | CSAR_peak_ | 24.21,7.92,8. | - |
| chr1 | 27566450 | 27566494 | CSAR_peak_ | 9.58          | - |
| chr1 | 27568851 | 27568927 | CSAR_peak_ | 7.27,8.39     | - |
| chr1 | 27569098 | 27569245 | CSAR_peak_ | 7.27,8.65     | - |
| chr1 | 27569269 | 27569412 | CSAR_peak_ | 35.83,19.18   | - |
| chr1 | 27569451 | 27569596 | CSAR_peak_ | 12.17,9.77,6. | - |
| chr1 | 27575750 | 27575792 | CSAR_peak_ | 7.27          | - |
| chr1 | 27575925 | 27575972 | CSAR_peak_ | 7.27          | - |
| chr1 | 27576244 | 27576328 | CSAR_peak_ | 6.44,12.31    | - |
| chr1 | 27576434 | 27576479 | CSAR_peak_ | 8.2           | - |
| chr1 | 27576541 | 27576591 | CSAR_peak_ | 5.86          | - |
| chr1 | 27576901 | 27576963 | CSAR_peak_ | 14.88         | - |
| chr1 | 27577096 | 27577180 | CSAR_peak_ | 8.39,10.02    | - |
| chr1 | 27591516 | 27591567 | CSAR_peak_ | 7.27          | - |
| chr1 | 27593902 | 27594030 | CSAR_peak_ | 19.36,14.88   | - |
| chr1 | 27594054 | 27594116 | CSAR_peak_ | 12.17         | - |
| chr1 | 27633507 | 27633592 | CSAR_peak_ | 12.5,13.92    | - |
| chr1 | 27633665 | 27633706 | CSAR_peak_ | 13.48,12.31   | - |
| chr1 | 27633792 | 27633863 | CSAR_peak_ | 13.48,12.17   | - |
| chr1 | 27634037 | 27634089 | CSAR_peak_ | 7.27          | - |
| chr1 | 27634378 | 27634444 | CSAR_peak_ | 9.27          | - |



|      |          |          |             |               |   |
|------|----------|----------|-------------|---------------|---|
| chr1 | 27634522 | 27634599 | CSAR_peak_1 | 9.77          | - |
| chr1 | 27634694 | 27634743 | CSAR_peak_1 | 17.82,5.86    | - |
| chr1 | 27634829 | 27634882 | CSAR_peak_1 | 8.65,11.38    | - |
| chr1 | 27639426 | 27639493 | CSAR_peak_1 | 12.5          | - |
| chr1 | 27639499 | 27639676 | CSAR_peak_1 | 10.53,17.82,1 | - |
| chr1 | 27639711 | 27639824 | CSAR_peak_1 | 6.21,9.77,10. | - |
| chr1 | 27639891 | 27640048 | CSAR_peak_1 | 25.62,15.2    | - |
| chr1 | 27640068 | 27640149 | CSAR_peak_1 | 12.13,6.03    | - |
| chr1 | 27640307 | 27640363 | CSAR_peak_1 | 27.61,18.73   | - |
| chr1 | 27642405 | 27642489 | CSAR_peak_1 | 14.85,16.34   | - |
| chr1 | 27642534 | 27642903 | CSAR_peak_1 | 14.76,25.23,1 | - |
| chr1 | 27642971 | 27643140 | CSAR_peak_1 | 13.84,6.51,8. | - |
| chr1 | 27643158 | 27643221 | CSAR_peak_1 | 7.92,7.27     | - |
| chr1 | 27643292 | 27643350 | CSAR_peak_1 | 26.05,12.74   | - |
| chr1 | 27643463 | 27643559 | CSAR_peak_1 | 63.11,29.28   | - |
| chr1 | 27643561 | 27643891 | CSAR_peak_1 | 9.58,79.48,8. | - |
| chr1 | 27643912 | 27644192 | CSAR_peak_1 | 8.98,14.34,2  | - |
| chr1 | 27644194 | 27644367 | CSAR_peak_1 | 40.73,5.91,2  | - |
| chr1 | 27644458 | 27644563 | CSAR_peak_1 | 23.16,36.5    | - |
| chr1 | 27644594 | 27644685 | CSAR_peak_1 | 34.09,17.87   | - |
| chr1 | 27644726 | 27644895 | CSAR_peak_1 | 45.96,29.53   | - |
| chr1 | 27644921 | 27645107 | CSAR_peak_1 | 35.38,5.9,22. | - |
| chr1 | 27645113 | 27645316 | CSAR_peak_1 | 29.19,48.59   | - |
| chr1 | 27645319 | 27645377 | CSAR_peak_1 | 18.35         | - |
| chr1 | 27645443 | 27646037 | CSAR_peak_1 | 51.17,59.38   | - |
| chr1 | 27646064 | 27646189 | CSAR_peak_1 | 17.94,12.84   | - |
| chr1 | 27646247 | 27646532 | CSAR_peak_1 | 62.73,11.63,1 | - |
| chr1 | 27646566 | 27646650 | CSAR_peak_1 | 22.56,38.71   | - |
| chr1 | 27688761 | 27688867 | CSAR_peak_1 | 10.02,6.1     | - |
| chr1 | 27688895 | 27688923 | CSAR_peak_1 | 8.39          | - |
| chr1 | 27690614 | 27690657 | CSAR_peak_1 | 9.58          | - |
| chr1 | 27690737 | 27690789 | CSAR_peak_1 | 6.57          | - |
| chr1 | 27691235 | 27691301 | CSAR_peak_1 | 12.13         | - |
| chr1 | 27692584 | 27692684 | CSAR_peak_1 | 9.77          | - |
| chr1 | 27692777 | 27692847 | CSAR_peak_1 | 25.08,14.88,1 | - |
| chr1 | 27693832 | 27693928 | CSAR_peak_1 | 8.14,9.77,10. | - |
| chr1 | 27693995 | 27694054 | CSAR_peak_1 | 7.31,8.28     | - |
| chr1 | 27694111 | 27694258 | CSAR_peak_1 | 11.28,13.48   | - |
| chr1 | 27695452 | 27695503 | CSAR_peak_1 | 9.58,7.27     | - |
| chr1 | 27696003 | 27696053 | CSAR_peak_1 | 6.21          | - |
| chr1 | 27696981 | 27697026 | CSAR_peak_1 | 7.27          | - |
| chr1 | 27704849 | 27704961 | CSAR_peak_1 | 10.83,19.36,1 | - |

|      |          |          |             |             |   |
|------|----------|----------|-------------|-------------|---|
| chr1 | 27705024 | 27705052 | CSAR_peak_1 | 7.27        | - |
| chr1 | 27705134 | 27705175 | CSAR_peak_1 | 7.27        | - |
| chr1 | 27705816 | 27705855 | CSAR_peak_1 | 7.34        | - |
| chr1 | 27705942 | 27705990 | CSAR_peak_1 | 6.21        | - |
| chr1 | 27732008 | 27732068 | CSAR_peak_1 | 9.58        | - |
| chr1 | 27739379 | 27739460 | CSAR_peak_1 | 16.11       | - |
| chr1 | 27739494 | 27739547 | CSAR_peak_1 | 6.81,6.21   | - |
| chr1 | 27739591 | 27739640 | CSAR_peak_1 | 9.58,8.65   | - |
| chr1 | 27739830 | 27739882 | CSAR_peak_1 | 14.88       | - |
| chr1 | 27799375 | 27799442 | CSAR_peak_1 | 8.28        | - |
| chr1 | 27799730 | 27799805 | CSAR_peak_1 | 10.83       | - |
| chr1 | 27801237 | 27801283 | CSAR_peak_1 | 7.27        | - |
| chr1 | 27801808 | 27801865 | CSAR_peak_1 | 17.82,16.33 | - |
| chr1 | 27802659 | 27802684 | CSAR_peak_1 | 9.58        | - |
| chr1 | 27804440 | 27804493 | CSAR_peak_1 | 14.88       | - |
| chr1 | 27806869 | 27806938 | CSAR_peak_1 | 8.39        | - |
| chr1 | 27807065 | 27807122 | CSAR_peak_1 | 8.95,22.56  | - |
| chr1 | 27808717 | 27808730 | CSAR_peak_1 | 6.21        | - |
| chr1 | 27808734 | 27808754 | CSAR_peak_1 | 6.57        | - |
| chr1 | 27809321 | 27809392 | CSAR_peak_1 | 13.51,10.83 | - |
| chr1 | 27810170 | 27810237 | CSAR_peak_1 | 9.77        | - |
| chr1 | 27810273 | 27810385 | CSAR_peak_1 | 7.27        | - |
| chr1 | 27811320 | 27811353 | CSAR_peak_1 | 8.39        | - |
| chr1 | 27811514 | 27811552 | CSAR_peak_1 | 6.21        | - |
| chr1 | 27811750 | 27811797 | CSAR_peak_1 | 9.58,9.58   | - |
| chr1 | 27813724 | 27813796 | CSAR_peak_1 | 7.27,7.27   | - |
| chr1 | 27813983 | 27814042 | CSAR_peak_1 | 8.9         | - |
| chr1 | 27814390 | 27814434 | CSAR_peak_1 | 7.27        | - |
| chr1 | 27821719 | 27821756 | CSAR_peak_1 | 7.27        | - |
| chr1 | 27821874 | 27821914 | CSAR_peak_1 | 10.83       | - |
| chr1 | 27822027 | 27822209 | CSAR_peak_1 | 10.83,21.94 | - |
| chr1 | 27822315 | 27822354 | CSAR_peak_1 | 6.03,7.92   | - |
| chr1 | 27822627 | 27822700 | CSAR_peak_1 | 33.47,11.75 | - |
| chr1 | 27822793 | 27822825 | CSAR_peak_1 | 7.27        | - |
| chr1 | 27823038 | 27823069 | CSAR_peak_1 | 12.17       | - |
| chr1 | 27823191 | 27823231 | CSAR_peak_1 | 9.58,16.33  | - |
| chr1 | 27835616 | 27835670 | CSAR_peak_1 | 6.21        | - |
| chr1 | 27837042 | 27837095 | CSAR_peak_1 | 9.58        | - |
| chr1 | 27847591 | 27847625 | CSAR_peak_1 | 5.86        | - |
| chr1 | 27864690 | 27864774 | CSAR_peak_1 | 8.2,5.86    | - |
| chr1 | 27865221 | 27865306 | CSAR_peak_1 | 14.88       | - |
| chr1 | 27865331 | 27865406 | CSAR_peak_1 | 8.28        | - |

|      |          |          |            |                |   |
|------|----------|----------|------------|----------------|---|
| chr1 | 27893914 | 27893965 | CSAR_peak_ | 7.27           | - |
| chr1 | 27894107 | 27894160 | CSAR_peak_ | 10.95          | - |
| chr1 | 27943799 | 27943938 | CSAR_peak_ | 8.39,10.83     | - |
| chr1 | 27944295 | 27944358 | CSAR_peak_ | 10.83          | - |
| chr1 | 27944510 | 27944675 | CSAR_peak_ | 13.48,12.17    | - |
| chr1 | 27945075 | 27945107 | CSAR_peak_ | 7.58           | - |
| chr1 | 27945148 | 27945165 | CSAR_peak_ | 9.1            | - |
| chr1 | 27945334 | 27945413 | CSAR_peak_ | 6.44,10.83,24  | - |
| chr1 | 27945938 | 27945970 | CSAR_peak_ | 6.21           | - |
| chr1 | 27945976 | 27946046 | CSAR_peak_ | 5.86,7.26,12.  | - |
| chr1 | 27946172 | 27946262 | CSAR_peak_ | 9.77,9.58      | - |
| chr1 | 27946497 | 27946556 | CSAR_peak_ | 11.38,9.58     | - |
| chr1 | 27946599 | 27946663 | CSAR_peak_ | 44.49,8.09     | - |
| chr1 | 27946732 | 27946787 | CSAR_peak_ | 14.76,14.88    | - |
| chr1 | 27946923 | 27947030 | CSAR_peak_ | 6.95,9.55      | - |
| chr1 | 27948620 | 27948687 | CSAR_peak_ | 14.88,14.88    | - |
| chr1 | 27949083 | 27949120 | CSAR_peak_ | 6.21           | - |
| chr1 | 27949871 | 27949928 | CSAR_peak_ | 9.58           | - |
| chr1 | 27950017 | 27950097 | CSAR_peak_ | 22.56,17.82    | - |
| chr1 | 27951069 | 27951135 | CSAR_peak_ | 9.58,8.39      | - |
| chr1 | 27984492 | 27984613 | CSAR_peak_ | 21.02,23.6,44  | - |
| chr1 | 27984669 | 27984709 | CSAR_peak_ | 9.05           | - |
| chr1 | 27984780 | 27984880 | CSAR_peak_ | 44.05,48.43,44 | - |
| chr1 | 27984974 | 27985044 | CSAR_peak_ | 31.81,6.94,10  | - |
| chr1 | 28008294 | 28008344 | CSAR_peak_ | 8.39           | - |
| chr1 | 28009778 | 28009831 | CSAR_peak_ | 7.27           | - |
| chr1 | 28080311 | 28080378 | CSAR_peak_ | 7.27           | - |
| chr1 | 28080611 | 28080706 | CSAR_peak_ | 8.39           | - |
| chr1 | 28081320 | 28081371 | CSAR_peak_ | 7.27           | - |
| chr1 | 28082063 | 28082120 | CSAR_peak_ | 7.27           | - |
| chr1 | 28113777 | 28113873 | CSAR_peak_ | 14.85,10.83    | - |
| chr1 | 28114054 | 28114118 | CSAR_peak_ | 6.03           | - |
| chr1 | 28114440 | 28114506 | CSAR_peak_ | 6.21           | - |
| chr1 | 28115471 | 28115539 | CSAR_peak_ | 6.21           | - |
| chr1 | 28115855 | 28115897 | CSAR_peak_ | 9.58           | - |
| chr1 | 28116016 | 28116102 | CSAR_peak_ | 14.59,9.77     | - |
| chr1 | 28116165 | 28116248 | CSAR_peak_ | 40.66,11.14    | - |
| chr1 | 28116330 | 28116391 | CSAR_peak_ | 7.73,7.92      | - |
| chr1 | 28116474 | 28116507 | CSAR_peak_ | 12.13          | - |
| chr1 | 28116523 | 28116586 | CSAR_peak_ | 12.35,6.22,10  | - |
| chr1 | 28116649 | 28116991 | CSAR_peak_ | 14.76,34.89,44 | - |
| chr1 | 28117014 | 28117281 | CSAR_peak_ | 13.95,30.81,44 | - |

|      |          |          |             |                |   |
|------|----------|----------|-------------|----------------|---|
| chr1 | 28120043 | 28120128 | CSAR_peak_1 | 10.95          | - |
| chr1 | 28130375 | 28130417 | CSAR_peak_1 | 10.83          | - |
| chr1 | 28130492 | 28130532 | CSAR_peak_1 | 6.57,10.83     | - |
| chr1 | 28134814 | 28134862 | CSAR_peak_1 | 9.58           | - |
| chr1 | 28135721 | 28135797 | CSAR_peak_1 | 12.35,7.58     | - |
| chr1 | 28135860 | 28135904 | CSAR_peak_1 | 10.83          | - |
| chr1 | 28135966 | 28136088 | CSAR_peak_1 | 31.2,6.1,25.9  | - |
| chr1 | 28136131 | 28136238 | CSAR_peak_1 | 8.44,7.2       | - |
| chr1 | 28136277 | 28136363 | CSAR_peak_1 | 13.09,14.34    | - |
| chr1 | 28136569 | 28136675 | CSAR_peak_1 | 20.43,10.83    | - |
| chr1 | 28136725 | 28136814 | CSAR_peak_1 | 24.21,23.49    | - |
| chr1 | 28136815 | 28136839 | CSAR_peak_1 | 27.11          | - |
| chr1 | 28136921 | 28136970 | CSAR_peak_1 | 23.95          | - |
| chr1 | 28137068 | 28137130 | CSAR_peak_1 | 8.14,12.13     | - |
| chr1 | 28137241 | 28137287 | CSAR_peak_1 | 6.21           | - |
| chr1 | 28137325 | 28137358 | CSAR_peak_1 | 10.02          | - |
| chr1 | 28137405 | 28137476 | CSAR_peak_1 | 35.97,14.63,(- | - |
| chr1 | 28137551 | 28137595 | CSAR_peak_1 | 31.2,21        | - |
| chr1 | 28137714 | 28137802 | CSAR_peak_1 | 20.96,17.89    | - |
| chr1 | 28137905 | 28137990 | CSAR_peak_1 | 25.91,31.2     | - |
| chr1 | 28138090 | 28138137 | CSAR_peak_1 | 9.58           | - |
| chr1 | 28138396 | 28138460 | CSAR_peak_1 | 25.91,17.82,(- | - |
| chr1 | 28139362 | 28139427 | CSAR_peak_1 | 8.84,17.4      | - |
| chr1 | 28139572 | 28139633 | CSAR_peak_1 | 16.33,14.88    | - |
| chr1 | 28139756 | 28139798 | CSAR_peak_1 | 8.39           | - |
| chr1 | 28139811 | 28139858 | CSAR_peak_1 | 8.39           | - |
| chr1 | 28140008 | 28140071 | CSAR_peak_1 | 5.86           | - |
| chr1 | 28140967 | 28141014 | CSAR_peak_1 | 9.58           | - |
| chr1 | 28141287 | 28141353 | CSAR_peak_1 | 24.21,7.27     | - |
| chr1 | 28141366 | 28141436 | CSAR_peak_1 | 9.27           | - |
| chr1 | 28141703 | 28141758 | CSAR_peak_1 | 6.57           | - |
| chr1 | 28141988 | 28142045 | CSAR_peak_1 | 7.94           | - |
| chr1 | 28142122 | 28142167 | CSAR_peak_1 | 17.82          | - |
| chr1 | 28142247 | 28142311 | CSAR_peak_1 | 13.48,17.82    | - |
| chr1 | 28142465 | 28142550 | CSAR_peak_1 | 9.58,13.44     | - |
| chr1 | 28148527 | 28148583 | CSAR_peak_1 | 16.33,7.27     | - |
| chr1 | 28148766 | 28148810 | CSAR_peak_1 | 8.39           | - |
| chr1 | 28148825 | 28149061 | CSAR_peak_1 | 37.04,28.65,(- | - |
| chr1 | 28149077 | 28149378 | CSAR_peak_1 | 22.32,16.33,(- | - |
| chr1 | 28149410 | 28149749 | CSAR_peak_1 | 93.71,6.03,8(- | - |
| chr1 | 28149753 | 28150285 | CSAR_peak_1 | 44.77,44.23,(- | - |
| chr1 | 28150308 | 28150359 | CSAR_peak_1 | 10.94,8.09     | - |

|      |          |          |             |                   |   |
|------|----------|----------|-------------|-------------------|---|
| chr1 | 28152118 | 28152175 | CSAR_peak_1 | 7.27              | - |
| chr1 | 28152820 | 28152850 | CSAR_peak_1 | 7.27              | - |
| chr1 | 28152973 | 28152985 | CSAR_peak_1 | 10.95,8.28        | - |
| chr1 | 28153219 | 28153263 | CSAR_peak_1 | 8.39              | - |
| chr1 | 28154108 | 28154147 | CSAR_peak_1 | 6.21              | - |
| chr1 | 28154419 | 28154462 | CSAR_peak_1 | 9.58              | - |
| chr1 | 28154494 | 28154526 | CSAR_peak_1 | 10.95             | - |
| chr1 | 28154725 | 28154761 | CSAR_peak_1 | 10.62             | - |
| chr1 | 28154819 | 28154838 | CSAR_peak_1 | 8.39              | - |
| chr1 | 28155630 | 28155675 | CSAR_peak_1 | 13.44             | - |
| chr1 | 28165151 | 28165204 | CSAR_peak_1 | 9.58              | - |
| chr1 | 28165616 | 28165675 | CSAR_peak_1 | 8.65,6.03         | - |
| chr1 | 28168086 | 28168162 | CSAR_peak_1 | 14.92,9.97        | - |
| chr1 | 28168300 | 28168322 | CSAR_peak_1 | 10.95             | - |
| chr1 | 28168728 | 28168762 | CSAR_peak_1 | 12.13             | - |
| chr1 | 28191562 | 28191592 | CSAR_peak_1 | 13.66             | - |
| chr1 | 28191689 | 28191738 | CSAR_peak_1 | 6.87,6.85         | - |
| chr1 | 28191999 | 28192067 | CSAR_peak_1 | 9.58              | - |
| chr1 | 28192437 | 28192543 | CSAR_peak_1 | 8.39,10.83        | - |
| chr1 | 28192851 | 28192940 | CSAR_peak_1 | 7.27              | - |
| chr1 | 28202186 | 28202293 | CSAR_peak_1 | 7.27              | - |
| chr1 | 28203289 | 28203386 | CSAR_peak_1 | 12.13,8.39        | - |
| chr1 | 28216272 | 28216303 | CSAR_peak_1 | 6.02              | - |
| chr1 | 28216339 | 28216394 | CSAR_peak_1 | 13.29,6.44        | - |
| chr1 | 28216461 | 28216520 | CSAR_peak_1 | 6.21,7.27         | - |
| chr1 | 28216741 | 28216795 | CSAR_peak_1 | 9.58              | - |
| chr1 | 28217216 | 28217302 | CSAR_peak_1 | 30.81,9.61        | - |
| chr1 | 28217380 | 28217492 | CSAR_peak_1 | 17.82,8.39        | - |
| chr1 | 28217855 | 28217914 | CSAR_peak_1 | 16.33             | - |
| chr1 | 28217934 | 28217992 | CSAR_peak_1 | 10.83             | - |
| chr1 | 28227851 | 28227901 | CSAR_peak_1 | 8.39              | - |
| chr1 | 28228815 | 28228896 | CSAR_peak_1 | 8.39              | - |
| chr1 | 28228951 | 28229072 | CSAR_peak_1 | 9.77,24.21        | - |
| chr1 | 28229102 | 28229206 | CSAR_peak_1 | 14.88,10.02       | - |
| chr1 | 28229270 | 28229367 | CSAR_peak_1 | 14.92,13.09       | - |
| chr1 | 28229431 | 28229588 | CSAR_peak_1 | 14.08,28.34,10.83 | - |
| chr1 | 28229615 | 28229706 | CSAR_peak_1 | 16.08,16.05       | - |
| chr1 | 28229758 | 28230043 | CSAR_peak_1 | 6.45,50.34,50.34  | - |
| chr1 | 28230044 | 28230097 | CSAR_peak_1 | 8.14,5.86         | - |
| chr1 | 28230138 | 28230268 | CSAR_peak_1 | 12.72,10.82,10.82 | - |
| chr1 | 28230300 | 28230437 | CSAR_peak_1 | 21.22,16.87,16.87 | - |
| chr1 | 28230471 | 28230666 | CSAR_peak_1 | 38.71,14.73,14.73 | - |

|      |          |          |            |               |   |
|------|----------|----------|------------|---------------|---|
| chr1 | 28230671 | 28230721 | CSAR_peak_ | 11.14,8.95    | - |
| chr1 | 28230733 | 28230768 | CSAR_peak_ | 22.06         | - |
| chr1 | 28230841 | 28230973 | CSAR_peak_ | 23.03,7.53,2  | - |
| chr1 | 28231065 | 28231130 | CSAR_peak_ | 13.51,12.13   | - |
| chr1 | 28231151 | 28231774 | CSAR_peak_ | 35.19,7.27,2  | - |
| chr1 | 28231813 | 28231917 | CSAR_peak_ | 21.33,26.97   | - |
| chr1 | 28231919 | 28232090 | CSAR_peak_ | 13.85,16.34,  | - |
| chr1 | 28232110 | 28232239 | CSAR_peak_ | 12.27,6.85    | - |
| chr1 | 28232295 | 28232370 | CSAR_peak_ | 7.34,16.05    | - |
| chr1 | 28232387 | 28232789 | CSAR_peak_ | 62.39,29.48,  | - |
| chr1 | 28250275 | 28250315 | CSAR_peak_ | 6.21          | - |
| chr1 | 28254517 | 28254596 | CSAR_peak_ | 9.58,6.21     | - |
| chr1 | 28254971 | 28255036 | CSAR_peak_ | 7.27          | - |
| chr1 | 28256222 | 28256285 | CSAR_peak_ | 13.44         | - |
| chr1 | 28256509 | 28256562 | CSAR_peak_ | 8.39          | - |
| chr1 | 28256772 | 28256809 | CSAR_peak_ | 7.58          | - |
| chr1 | 28270858 | 28270908 | CSAR_peak_ | 8.39          | - |
| chr1 | 28276783 | 28276848 | CSAR_peak_ | 7.26,7.27     | - |
| chr1 | 28278002 | 28278084 | CSAR_peak_ | 20.05,15.56   | - |
| chr1 | 28278896 | 28278978 | CSAR_peak_ | 9.58          | - |
| chr1 | 28279108 | 28279194 | CSAR_peak_ | 7.27,9.58     | - |
| chr1 | 28281613 | 28281709 | CSAR_peak_ | 12.17,14.88,  | - |
| chr1 | 28281763 | 28281863 | CSAR_peak_ | 33.03,38.71   | - |
| chr1 | 28282041 | 28282118 | CSAR_peak_ | 22.52,8.84    | - |
| chr1 | 28282231 | 28282281 | CSAR_peak_ | 6.03,7.27     | - |
| chr1 | 28282310 | 28282378 | CSAR_peak_ | 7.27          | - |
| chr1 | 28282429 | 28282566 | CSAR_peak_ | 8.14,14.59,6. | - |
| chr1 | 28282599 | 28282623 | CSAR_peak_ | 8.39          | - |
| chr1 | 28282624 | 28282656 | CSAR_peak_ | 7.27          | - |
| chr1 | 28282734 | 28282784 | CSAR_peak_ | 6.44          | - |
| chr1 | 28282801 | 28282816 | CSAR_peak_ | 7.27          | - |
| chr1 | 28282954 | 28282996 | CSAR_peak_ | 12.17         | - |
| chr1 | 28283032 | 28283139 | CSAR_peak_ | 16.05         | - |
| chr1 | 28283333 | 28283417 | CSAR_peak_ | 24.15,17.4    | - |
| chr1 | 28283591 | 28283647 | CSAR_peak_ | 17.82,9.97    | - |
| chr1 | 28283882 | 28283927 | CSAR_peak_ | 8.39,16.33    | - |
| chr1 | 28300201 | 28300251 | CSAR_peak_ | 8.39          | - |
| chr1 | 28300425 | 28300510 | CSAR_peak_ | 9.77,12.13    | - |
| chr1 | 28300560 | 28300616 | CSAR_peak_ | 9.58          | - |
| chr1 | 28300785 | 28300877 | CSAR_peak_ | 6.87,18.73    | - |
| chr1 | 28301839 | 28301892 | CSAR_peak_ | 12.13         | - |
| chr1 | 28338451 | 28338484 | CSAR_peak_ | 14.92         | - |

|      |          |          |            |             |   |
|------|----------|----------|------------|-------------|---|
| chr1 | 28338597 | 28338688 | CSAR_peak_ | 25.08,36.78 | - |
| chr1 | 28338889 | 28338980 | CSAR_peak_ | 9.58        | - |
| chr1 | 28339040 | 28339095 | CSAR_peak_ | 12.13       | - |
| chr1 | 28339221 | 28339279 | CSAR_peak_ | 21.94,16.33 | - |
| chr1 | 28339523 | 28339527 | CSAR_peak_ | 9.58        | - |
| chr1 | 28339603 | 28339653 | CSAR_peak_ | 14.88,9.58  | - |
| chr1 | 28339717 | 28339733 | CSAR_peak_ | 7.27        | - |
| chr1 | 28347278 | 28347357 | CSAR_peak_ | 24.21       | - |
| chr1 | 28347500 | 28347527 | CSAR_peak_ | 10.83       | - |
| chr1 | 28371880 | 28371936 | CSAR_peak_ | 14.76       | - |
| chr1 | 28372653 | 28372727 | CSAR_peak_ | 5.86        | - |
| chr1 | 28417921 | 28417977 | CSAR_peak_ | 6.03        | - |
| chr1 | 28441714 | 28441799 | CSAR_peak_ | 11.74,6.1   | - |
| chr1 | 28441894 | 28441974 | CSAR_peak_ | 13.85,6.1   | - |
| chr1 | 28442077 | 28442117 | CSAR_peak_ | 13.44,10.31 | - |
| chr1 | 28448408 | 28448455 | CSAR_peak_ | 8.39        | - |
| chr1 | 28478156 | 28478205 | CSAR_peak_ | 8.39        | - |
| chr1 | 28478404 | 28478478 | CSAR_peak_ | 12.72,8.65  | - |
| chr1 | 28478811 | 28478849 | CSAR_peak_ | 10.83       | - |
| chr1 | 28478901 | 28478925 | CSAR_peak_ | 6.44        | - |
| chr1 | 28479656 | 28479734 | CSAR_peak_ | 9.61,7.36   | - |
| chr1 | 28479876 | 28479916 | CSAR_peak_ | 7.92        | - |
| chr1 | 28480237 | 28480297 | CSAR_peak_ | 13.44       | - |
| chr1 | 28480436 | 28480471 | CSAR_peak_ | 7.73        | - |
| chr1 | 28480483 | 28480502 | CSAR_peak_ | 6.44        | - |
| chr1 | 28480578 | 28480595 | CSAR_peak_ | 6.95        | - |
| chr1 | 28480742 | 28480812 | CSAR_peak_ | 17.82,12.94 | - |
| chr1 | 28481017 | 28481067 | CSAR_peak_ | 19.36,14.88 | - |
| chr1 | 28481089 | 28481158 | CSAR_peak_ | 6.45        | - |
| chr1 | 28482048 | 28482086 | CSAR_peak_ | 6.21        | - |
| chr1 | 28482272 | 28482319 | CSAR_peak_ | 9.77        | - |
| chr1 | 28482351 | 28482387 | CSAR_peak_ | 7.27        | - |
| chr1 | 28482479 | 28482569 | CSAR_peak_ | 9.61,22.56  | - |
| chr1 | 28482653 | 28482662 | CSAR_peak_ | 8.65        | - |
| chr1 | 28482886 | 28482929 | CSAR_peak_ | 7.26        | - |
| chr1 | 28482952 | 28482980 | CSAR_peak_ | 14.85,9.72  | - |
| chr1 | 28483057 | 28483106 | CSAR_peak_ | 16.34,13.29 | - |
| chr1 | 28483139 | 28483196 | CSAR_peak_ | 6.03        | - |
| chr1 | 28483396 | 28483519 | CSAR_peak_ | 7.92,21.26  | - |
| chr1 | 28483881 | 28483923 | CSAR_peak_ | 18.73,19.98 | - |
| chr1 | 28484350 | 28484380 | CSAR_peak_ | 7.58        | - |
| chr1 | 28484924 | 28485001 | CSAR_peak_ | 9.27,12.31  | - |

|      |          |          |            |               |   |
|------|----------|----------|------------|---------------|---|
| chr1 | 28485187 | 28485319 | CSAR_peak_ | 9.58,6.21     | - |
| chr1 | 28485523 | 28485627 | CSAR_peak_ | 11.14,12.13   | - |
| chr1 | 28485726 | 28485784 | CSAR_peak_ | 12.13,8.39    | - |
| chr1 | 28485860 | 28485912 | CSAR_peak_ | 18.95         | - |
| chr1 | 28515457 | 28515518 | CSAR_peak_ | 7.58          | - |
| chr1 | 28528577 | 28528674 | CSAR_peak_ | 14.22,9.58,6. | - |
| chr1 | 28528719 | 28528750 | CSAR_peak_ | 8.65          | - |
| chr1 | 28529031 | 28529146 | CSAR_peak_ | 11.14,8.53    | - |
| chr1 | 28529389 | 28529473 | CSAR_peak_ | 9.58,21.22    | - |
| chr1 | 28529983 | 28530053 | CSAR_peak_ | 7.58          | - |
| chr1 | 28530708 | 28530747 | CSAR_peak_ | 6.21          | - |
| chr1 | 28548196 | 28548266 | CSAR_peak_ | 7.29,6.03     | - |
| chr1 | 28548292 | 28548412 | CSAR_peak_ | 19.36,12.31   | - |
| chr1 | 28555299 | 28555401 | CSAR_peak_ | 12.6,6.03     | - |
| chr1 | 28555496 | 28555566 | CSAR_peak_ | 12.31,5.86,1. | - |
| chr1 | 28555806 | 28555890 | CSAR_peak_ | 13.48,10.83   | - |
| chr1 | 28557114 | 28557150 | CSAR_peak_ | 8.2           | - |
| chr1 | 28557153 | 28557193 | CSAR_peak_ | 12.17         | - |
| chr1 | 28573802 | 28573854 | CSAR_peak_ | 7.27          | - |
| chr1 | 28574064 | 28574114 | CSAR_peak_ | 6.03          | - |
| chr1 | 28574710 | 28574802 | CSAR_peak_ | 13.48,7.58    | - |
| chr1 | 28574844 | 28574896 | CSAR_peak_ | 8.39,8.52     | - |
| chr1 | 28574941 | 28575064 | CSAR_peak_ | 14.88         | - |
| chr1 | 28575224 | 28575324 | CSAR_peak_ | 13.48,7.27    | - |
| chr1 | 28575429 | 28575561 | CSAR_peak_ | 31.72,25.34   | - |
| chr1 | 28575880 | 28575934 | CSAR_peak_ | 12.13,14.88   | - |
| chr1 | 28576012 | 28576086 | CSAR_peak_ | 10.02         | - |
| chr1 | 28576253 | 28576305 | CSAR_peak_ | 8.65          | - |
| chr1 | 28576359 | 28576373 | CSAR_peak_ | 27.64,6.57    | - |
| chr1 | 28576398 | 28576532 | CSAR_peak_ | 28.21,18.73,. | - |
| chr1 | 28577196 | 28577343 | CSAR_peak_ | 16.34,17.82   | - |
| chr1 | 28577593 | 28577731 | CSAR_peak_ | 7.27,7.27     | - |
| chr1 | 28578161 | 28578205 | CSAR_peak_ | 7.27          | - |
| chr1 | 28578297 | 28578468 | CSAR_peak_ | 29.69,38.35,! | - |
| chr1 | 28578500 | 28578655 | CSAR_peak_ | 42.64,22.41,. | - |
| chr1 | 28578675 | 28578771 | CSAR_peak_ | 12.78,21.45   | - |
| chr1 | 28578800 | 28579139 | CSAR_peak_ | 34.31,6.81,2. | - |
| chr1 | 28579140 | 28579239 | CSAR_peak_ | 8.39,13.66    | - |
| chr1 | 28579379 | 28579437 | CSAR_peak_ | 6.85          | - |
| chr1 | 28579441 | 28579771 | CSAR_peak_ | 13.44,8.2,21. | - |
| chr1 | 28579844 | 28579959 | CSAR_peak_ | 25.48,17.3    | - |
| chr1 | 28580027 | 28580070 | CSAR_peak_ | 6.02          | - |



|      |          |          |            |                |
|------|----------|----------|------------|----------------|
| chr1 | 28580077 | 28580182 | CSAR_peak_ | 26.54,9.43,1:- |
| chr1 | 28580455 | 28580488 | CSAR_peak_ | 7.27 -         |
| chr1 | 28580682 | 28580688 | CSAR_peak_ | 14.76 -        |
| chr1 | 28580762 | 28580821 | CSAR_peak_ | 17.82,9.72 -   |
| chr1 | 28580880 | 28580963 | CSAR_peak_ | 16.87,12.13 -  |
| chr1 | 28584223 | 28584412 | CSAR_peak_ | 19.98,17.4,7 - |
| chr1 | 28584455 | 28584542 | CSAR_peak_ | 17.35,14.85,-  |
| chr1 | 28584548 | 28584587 | CSAR_peak_ | 14.88,7.27 -   |
| chr1 | 28584610 | 28584750 | CSAR_peak_ | 7.29,13.48,2!- |
| chr1 | 28584870 | 28584961 | CSAR_peak_ | 19.36,7.58 -   |
| chr1 | 28585002 | 28585111 | CSAR_peak_ | 14.88 -        |
| chr1 | 28585223 | 28585359 | CSAR_peak_ | 12.31,12.17,{- |
| chr1 | 28585386 | 28585533 | CSAR_peak_ | 9.61,9.61,17.- |
| chr1 | 28585578 | 28585643 | CSAR_peak_ | 9.58,6.81,16.- |
| chr1 | 28585854 | 28585900 | CSAR_peak_ | 5.86 -         |
| chr1 | 28586184 | 28586225 | CSAR_peak_ | 8.14 -         |
| chr1 | 28586299 | 28586332 | CSAR_peak_ | 7.27 -         |
| chr1 | 28586545 | 28586750 | CSAR_peak_ | 8.65,42.64,3:- |
| chr1 | 28586785 | 28586854 | CSAR_peak_ | 14.88,10.83 -  |
| chr1 | 28586879 | 28586944 | CSAR_peak_ | 15.56,9.32 -   |
| chr1 | 28586960 | 28587011 | CSAR_peak_ | 9.72,10.02 -   |
| chr1 | 28587042 | 28587202 | CSAR_peak_ | 27.67,50.92,!- |
| chr1 | 28587205 | 28587723 | CSAR_peak_ | 24.29,40.67,;- |
| chr1 | 28643461 | 28643557 | CSAR_peak_ | 14.88,8.95 -   |
| chr1 | 28643749 | 28643821 | CSAR_peak_ | 10.83 -        |
| chr1 | 28643824 | 28643878 | CSAR_peak_ | 7.27 -         |
| chr1 | 28644325 | 28644363 | CSAR_peak_ | 8.65 -         |
| chr1 | 28644467 | 28644540 | CSAR_peak_ | 31.2,6.44 -    |
| chr1 | 28644715 | 28644862 | CSAR_peak_ | 12.17,7.27 -   |
| chr1 | 28644935 | 28645012 | CSAR_peak_ | 14.88,14.88 -  |
| chr1 | 28645547 | 28645632 | CSAR_peak_ | 14.88 -        |
| chr1 | 28645726 | 28645750 | CSAR_peak_ | 6.21 -         |
| chr1 | 28645783 | 28646043 | CSAR_peak_ | 55.05,37.04 -  |
| chr1 | 28646082 | 28646133 | CSAR_peak_ | 13.48,7.27 -   |
| chr1 | 28646454 | 28646492 | CSAR_peak_ | 6.21 -         |
| chr1 | 28652125 | 28652184 | CSAR_peak_ | 12.31 -        |
| chr1 | 28652555 | 28652652 | CSAR_peak_ | 19.36,7.27 -   |
| chr1 | 28654174 | 28654224 | CSAR_peak_ | 10.83 -        |
| chr1 | 28654250 | 28654300 | CSAR_peak_ | 10.83 -        |
| chr1 | 28709671 | 28709735 | CSAR_peak_ | 7.27 -         |
| chr1 | 28725607 | 28725713 | CSAR_peak_ | 8.39,9.58 -    |
| chr1 | 28726084 | 28726133 | CSAR_peak_ | 7.27 -         |

|      |          |          |            |              |    |
|------|----------|----------|------------|--------------|----|
| chr1 | 28766764 | 28766860 | CSAR_peak_ | 31.73        | -  |
| chr1 | 28766879 | 28767124 | CSAR_peak_ | 28.53,28.93, | {- |
| chr1 | 28767127 | 28767153 | CSAR_peak_ | 7.09,27.92   | -  |
| chr1 | 28767155 | 28767422 | CSAR_peak_ | 45.59,46.53  | -  |
| chr1 | 28769267 | 28769327 | CSAR_peak_ | 7.34         | -  |
| chr1 | 28770219 | 28770267 | CSAR_peak_ | 7.27         | -  |
| chr1 | 28771010 | 28771062 | CSAR_peak_ | 14.88        | -  |
| chr1 | 28771096 | 28771188 | CSAR_peak_ | 19.36,9.58   | -  |
| chr1 | 28779178 | 28779241 | CSAR_peak_ | 6.21         | -  |
| chr1 | 28780284 | 28780380 | CSAR_peak_ | 9.58,9.58    | -  |
| chr1 | 28780486 | 28780532 | CSAR_peak_ | 6.21         | -  |
| chr1 | 28780990 | 28781080 | CSAR_peak_ | 17.82,7.58   | -  |
| chr1 | 28781384 | 28781530 | CSAR_peak_ | 14.88,8.95   | -  |
| chr1 | 28781741 | 28781801 | CSAR_peak_ | 7.27         | -  |
| chr1 | 28781946 | 28782064 | CSAR_peak_ | 10.95,13.44  | -  |
| chr1 | 28782150 | 28782211 | CSAR_peak_ | 9.77,16.19   | -  |
| chr1 | 28782220 | 28782277 | CSAR_peak_ | 6.21,6.44    | -  |
| chr1 | 28782414 | 28782477 | CSAR_peak_ | 9.77         | -  |
| chr1 | 28782936 | 28782980 | CSAR_peak_ | 9.58         | -  |
| chr1 | 28783005 | 28783057 | CSAR_peak_ | 6.85,14.88   | -  |
| chr1 | 28790998 | 28791054 | CSAR_peak_ | 7.27         | -  |
| chr1 | 28795593 | 28795656 | CSAR_peak_ | 9.77         | -  |
| chr1 | 28803065 | 28803149 | CSAR_peak_ | 6.21         | -  |
| chr1 | 28803566 | 28803615 | CSAR_peak_ | 7.58         | -  |
| chr1 | 28822244 | 28822291 | CSAR_peak_ | 7.27         | -  |
| chr1 | 28822527 | 28822652 | CSAR_peak_ | 12.94,10.96  | -  |
| chr1 | 28822761 | 28822812 | CSAR_peak_ | 6.21         | -  |
| chr1 | 28822988 | 28823070 | CSAR_peak_ | 9.27         | -  |
| chr1 | 28823246 | 28823456 | CSAR_peak_ | 40.66,12.13  | -  |
| chr1 | 28831331 | 28831441 | CSAR_peak_ | 16.05,10.62  | -  |
| chr1 | 28831519 | 28831573 | CSAR_peak_ | 18.65,7.58   | -  |
| chr1 | 28831762 | 28831802 | CSAR_peak_ | 8.39         | -  |
| chr1 | 28831831 | 28831877 | CSAR_peak_ | 7.27         | -  |
| chr1 | 28832220 | 28832314 | CSAR_peak_ | 16.11,8.39   | -  |
| chr1 | 28832344 | 28832441 | CSAR_peak_ | 10.83,7.58   | -  |
| chr1 | 28832448 | 28832546 | CSAR_peak_ | 8.28,7.58    | -  |
| chr1 | 28832621 | 28832664 | CSAR_peak_ | 7.27         | -  |
| chr1 | 28832803 | 28832869 | CSAR_peak_ | 6.21,8.39    | -  |
| chr1 | 28832966 | 28833033 | CSAR_peak_ | 7.27         | -  |
| chr1 | 28833403 | 28833451 | CSAR_peak_ | 13.48        | -  |
| chr1 | 28833544 | 28833583 | CSAR_peak_ | 7.27         | -  |
| chr1 | 28833625 | 28833652 | CSAR_peak_ | 6.02         | -  |

|      |          |          |             |                |   |
|------|----------|----------|-------------|----------------|---|
| chr1 | 28833739 | 28833790 | CSAR_peak_1 | 12.13,8.65     | - |
| chr1 | 28833932 | 28834097 | CSAR_peak_1 | 22.58,17.82    | - |
| chr1 | 28834387 | 28834647 | CSAR_peak_1 | 9.77,13.48,6.  | - |
| chr1 | 28834650 | 28834698 | CSAR_peak_1 | 7.27           | - |
| chr1 | 28835111 | 28835176 | CSAR_peak_1 | 9.77,9.58      | - |
| chr1 | 28835241 | 28835294 | CSAR_peak_1 | 8.39,6.81      | - |
| chr1 | 28835301 | 28835340 | CSAR_peak_1 | 7.58           | - |
| chr1 | 28835507 | 28835568 | CSAR_peak_1 | 16.33          | - |
| chr1 | 28835590 | 28835691 | CSAR_peak_1 | 14.88,8.39,6.  | - |
| chr1 | 28835755 | 28835810 | CSAR_peak_1 | 8.39           | - |
| chr1 | 28835857 | 28836172 | CSAR_peak_1 | 12.59,9.58,8.  | - |
| chr1 | 28836338 | 28836384 | CSAR_peak_1 | 6.21           | - |
| chr1 | 28873586 | 28873666 | CSAR_peak_1 | 14.88          | - |
| chr1 | 28874009 | 28874045 | CSAR_peak_1 | 5.86           | - |
| chr1 | 28874057 | 28874098 | CSAR_peak_1 | 7.27,6.21      | - |
| chr1 | 28874613 | 28874722 | CSAR_peak_1 | 12.31          | - |
| chr1 | 28875013 | 28875139 | CSAR_peak_1 | 8.39,10.83     | - |
| chr1 | 28895519 | 28895586 | CSAR_peak_1 | 12.13          | - |
| chr1 | 28902513 | 28902572 | CSAR_peak_1 | 7.27           | - |
| chr1 | 28902779 | 28902805 | CSAR_peak_1 | 7.27           | - |
| chr1 | 28903124 | 28903165 | CSAR_peak_1 | 8.39           | - |
| chr1 | 28903322 | 28903372 | CSAR_peak_1 | 9.77           | - |
| chr1 | 28922916 | 28922984 | CSAR_peak_1 | 7.92           | - |
| chr1 | 28923357 | 28923424 | CSAR_peak_1 | 9.58,9.58      | - |
| chr1 | 28923463 | 28923553 | CSAR_peak_1 | 13.48,22.56    | - |
| chr1 | 28923625 | 28923694 | CSAR_peak_1 | 8.39,6.21      | - |
| chr1 | 28923797 | 28923878 | CSAR_peak_1 | 23.49,29.4     | - |
| chr1 | 28924214 | 28924307 | CSAR_peak_1 | 9.58,7.58      | - |
| chr1 | 28924435 | 28924497 | CSAR_peak_1 | 8.65           | - |
| chr1 | 28935401 | 28935475 | CSAR_peak_1 | 7.27           | - |
| chr1 | 28936524 | 28936635 | CSAR_peak_1 | 8.65,8.39,8.3  | - |
| chr1 | 28947939 | 28948164 | CSAR_peak_1 | 7.27,5.86      | - |
| chr1 | 28948252 | 28948325 | CSAR_peak_1 | 8.14,12.13     | - |
| chr1 | 28948360 | 28948418 | CSAR_peak_1 | 17.82          | - |
| chr1 | 28948440 | 28948484 | CSAR_peak_1 | 9.58           | - |
| chr1 | 28948485 | 28948505 | CSAR_peak_1 | 7.58           | - |
| chr1 | 28948547 | 28948625 | CSAR_peak_1 | 14.88,12.17,9. | - |
| chr1 | 28948708 | 28948811 | CSAR_peak_1 | 14.85          | - |
| chr1 | 28948876 | 28948974 | CSAR_peak_1 | 9.27,12.13,7.  | - |
| chr1 | 28949083 | 28949170 | CSAR_peak_1 | 7.27,18.55     | - |
| chr1 | 28949303 | 28949355 | CSAR_peak_1 | 12.35          | - |
| chr1 | 28950056 | 28950123 | CSAR_peak_1 | 9.58,7.27      | - |

|      |          |          |            |              |   |
|------|----------|----------|------------|--------------|---|
| chr1 | 28950193 | 28950250 | CSAR_peak_ | 17.82        | - |
| chr1 | 28950422 | 28950492 | CSAR_peak_ | 12.13        | - |
| chr1 | 28950638 | 28950742 | CSAR_peak_ | 6.57         | - |
| chr1 | 28950924 | 28951015 | CSAR_peak_ | 10.83        | - |
| chr1 | 28951151 | 28951218 | CSAR_peak_ | 9.77         | - |
| chr1 | 28951798 | 28951972 | CSAR_peak_ | 6.21,16.08,1 | - |
| chr1 | 28952010 | 28952185 | CSAR_peak_ | 22.56,17.51, | - |
| chr1 | 28952254 | 28952373 | CSAR_peak_ | 16.11        | - |
| chr1 | 28952399 | 28952451 | CSAR_peak_ | 10.83        | - |
| chr1 | 28952515 | 28952565 | CSAR_peak_ | 12.13        | - |
| chr1 | 28952677 | 28952759 | CSAR_peak_ | 12.17,25.91  | - |
| chr1 | 28953025 | 28953096 | CSAR_peak_ | 10.94        | - |
| chr1 | 28953276 | 28953382 | CSAR_peak_ | 7.92,11.66   | - |
| chr1 | 28998547 | 28998659 | CSAR_peak_ | 7.27,8.39    | - |
| chr1 | 28999838 | 28999919 | CSAR_peak_ | 21.94        | - |
| chr1 | 28999980 | 29000138 | CSAR_peak_ | 19.36,11.45, | - |
| chr1 | 29000212 | 29000304 | CSAR_peak_ | 10.83        | - |
| chr1 | 29000345 | 29000400 | CSAR_peak_ | 7            | - |
| chr1 | 29000436 | 29000525 | CSAR_peak_ | 5.86,6.02    | - |
| chr1 | 29000622 | 29000641 | CSAR_peak_ | 6.21         | - |
| chr1 | 29001097 | 29001236 | CSAR_peak_ | 24.21        | - |
| chr1 | 29001256 | 29001343 | CSAR_peak_ | 10.95,6.21   | - |
| chr1 | 29001450 | 29001503 | CSAR_peak_ | 8.39         | - |
| chr1 | 29001625 | 29001665 | CSAR_peak_ | 7.27         | - |
| chr1 | 29001964 | 29001993 | CSAR_peak_ | 7.27         | - |
| chr1 | 29020946 | 29021059 | CSAR_peak_ | 14.88        | - |
| chr1 | 29024093 | 29024144 | CSAR_peak_ | 8.39         | - |
| chr1 | 29025168 | 29025194 | CSAR_peak_ | 6.21         | - |
| chr1 | 29025284 | 29025314 | CSAR_peak_ | 9.58         | - |
| chr1 | 29040718 | 29040770 | CSAR_peak_ | 8.39         | - |
| chr1 | 29040961 | 29041027 | CSAR_peak_ | 9.77,13.44   | - |
| chr1 | 29042200 | 29042249 | CSAR_peak_ | 12.13,7,7.92 | - |
| chr1 | 29042510 | 29042582 | CSAR_peak_ | 20.13,7.58   | - |
| chr1 | 29043662 | 29043698 | CSAR_peak_ | 8.39         | - |
| chr1 | 29044310 | 29044325 | CSAR_peak_ | 7.27         | - |
| chr1 | 29044555 | 29044647 | CSAR_peak_ | 5.86,12.31   | - |
| chr1 | 29045194 | 29045285 | CSAR_peak_ | 9.55,5.86    | - |
| chr1 | 29045338 | 29045367 | CSAR_peak_ | 7.27         | - |
| chr1 | 29045949 | 29045999 | CSAR_peak_ | 12.13,9.58   | - |
| chr1 | 29046920 | 29046982 | CSAR_peak_ | 12.13        | - |
| chr1 | 29048522 | 29048575 | CSAR_peak_ | 12.13        | - |
| chr1 | 29113020 | 29113096 | CSAR_peak_ | 7.58         | - |

|      |          |          |            |               |   |
|------|----------|----------|------------|---------------|---|
| chr1 | 29113216 | 29113256 | CSAR_peak_ | 6.21          | - |
| chr1 | 29115149 | 29115214 | CSAR_peak_ | 7.58          | - |
| chr1 | 29186414 | 29186476 | CSAR_peak_ | 13.44         | - |
| chr1 | 29192462 | 29192548 | CSAR_peak_ | 20.94,7.27    | - |
| chr1 | 29192641 | 29192713 | CSAR_peak_ | 19.96,6.45,8. | - |
| chr1 | 29194735 | 29194898 | CSAR_peak_ | 17.82,31.2    | - |
| chr1 | 29195630 | 29195712 | CSAR_peak_ | 10.83,8.14,6. | - |
| chr1 | 29195858 | 29195979 | CSAR_peak_ | 9.58,8.14,20. | - |
| chr1 | 29202507 | 29202574 | CSAR_peak_ | 9.58,13.48    | - |
| chr1 | 29236148 | 29236180 | CSAR_peak_ | 6.03          | - |
| chr1 | 29236270 | 29236340 | CSAR_peak_ | 6.95,9.77     | - |
| chr1 | 29236759 | 29236801 | CSAR_peak_ | 6.21          | - |
| chr1 | 29237297 | 29237369 | CSAR_peak_ | 8.28,7.27     | - |
| chr1 | 29237861 | 29237905 | CSAR_peak_ | 6.03          | - |
| chr1 | 29238004 | 29238042 | CSAR_peak_ | 12.13         | - |
| chr1 | 29238105 | 29238152 | CSAR_peak_ | 12.17         | - |
| chr1 | 29238307 | 29238350 | CSAR_peak_ | 19.36         | - |
| chr1 | 29238396 | 29238469 | CSAR_peak_ | 14.76         | - |
| chr1 | 29238597 | 29238657 | CSAR_peak_ | 7.27          | - |
| chr1 | 29239195 | 29239231 | CSAR_peak_ | 7.27          | - |
| chr1 | 29304889 | 29304941 | CSAR_peak_ | 13.48         | - |
| chr1 | 29305280 | 29305323 | CSAR_peak_ | 6.21          | - |
| chr1 | 29329167 | 29329235 | CSAR_peak_ | 7.27          | - |
| chr1 | 29329273 | 29329313 | CSAR_peak_ | 8.39          | - |
| chr1 | 29329395 | 29329451 | CSAR_peak_ | 16.33,20.94   | - |
| chr1 | 29329583 | 29329823 | CSAR_peak_ | 18.73,9.58    | - |
| chr1 | 29329850 | 29329986 | CSAR_peak_ | 7.27,6.21,9.5 | - |
| chr1 | 29330071 | 29330229 | CSAR_peak_ | 12.6,16.33    | - |
| chr1 | 29330574 | 29330646 | CSAR_peak_ | 10.83,14.88   | - |
| chr1 | 29330660 | 29330831 | CSAR_peak_ | 6.81,18.95,2  | - |
| chr1 | 29330989 | 29331087 | CSAR_peak_ | 11.83,33.03   | - |
| chr1 | 29331176 | 29331273 | CSAR_peak_ | 19.36,24.21   | - |
| chr1 | 29331382 | 29331556 | CSAR_peak_ | 12.13,7.27,10 | - |
| chr1 | 29331667 | 29331717 | CSAR_peak_ | 9.58,10.02    | - |
| chr1 | 29331785 | 29332020 | CSAR_peak_ | 27.67,17.82,! | - |
| chr1 | 29332211 | 29332261 | CSAR_peak_ | 17.82,6.44    | - |
| chr1 | 29332399 | 29332511 | CSAR_peak_ | 24.52,9.58    | - |
| chr1 | 29332734 | 29332886 | CSAR_peak_ | 20.35,16.33,; | - |
| chr1 | 29433250 | 29433356 | CSAR_peak_ | 7.61,12.93,7. | - |
| chr1 | 29433410 | 29433470 | CSAR_peak_ | 17.82,30.81   | - |
| chr1 | 29433490 | 29433586 | CSAR_peak_ | 25.91,17.82   | - |
| chr1 | 29434012 | 29434089 | CSAR_peak_ | 18.95,7.92    | - |

|      |          |          |            |                  |   |
|------|----------|----------|------------|------------------|---|
| chr1 | 29434095 | 29434188 | CSAR_peak_ | 7.27,19.36       | - |
| chr1 | 29434294 | 29434377 | CSAR_peak_ | 21.94,9.41       | - |
| chr1 | 29434432 | 29434535 | CSAR_peak_ | 10.95,20.43      | - |
| chr1 | 29434586 | 29434639 | CSAR_peak_ | 16.25,35.83      | - |
| chr1 | 29434790 | 29434837 | CSAR_peak_ | 14.85,18.95      | - |
| chr1 | 29434928 | 29434983 | CSAR_peak_ | 35.83,17.19      | - |
| chr1 | 29435067 | 29435126 | CSAR_peak_ | 8.14             | - |
| chr1 | 29435229 | 29435394 | CSAR_peak_ | 9.77,11.14,14.14 | - |
| chr1 | 29435755 | 29435799 | CSAR_peak_ | 7.27             | - |
| chr1 | 29435812 | 29435846 | CSAR_peak_ | 10.31            | - |
| chr1 | 29436154 | 29436183 | CSAR_peak_ | 12.17            | - |
| chr1 | 29457498 | 29457577 | CSAR_peak_ | 8.39             | - |
| chr1 | 29458130 | 29458205 | CSAR_peak_ | 19.36,10.83      | - |
| chr1 | 29458460 | 29458558 | CSAR_peak_ | 9.61,5.86        | - |
| chr1 | 29458638 | 29458704 | CSAR_peak_ | 10.83            | - |
| chr1 | 29458837 | 29458856 | CSAR_peak_ | 6.21             | - |
| chr1 | 29486510 | 29486558 | CSAR_peak_ | 13.48            | - |
| chr1 | 29486566 | 29486586 | CSAR_peak_ | 6.21             | - |
| chr1 | 29486730 | 29486799 | CSAR_peak_ | 13.48,16.33      | - |
| chr1 | 29486837 | 29486933 | CSAR_peak_ | 12.13,7.27       | - |
| chr1 | 29486992 | 29487079 | CSAR_peak_ | 8.39             | - |
| chr1 | 29487505 | 29487559 | CSAR_peak_ | 9.58,19.36       | - |
| chr1 | 29487571 | 29487629 | CSAR_peak_ | 10.83            | - |
| chr1 | 29487748 | 29487843 | CSAR_peak_ | 21.94            | - |
| chr1 | 29518674 | 29518737 | CSAR_peak_ | 10.02            | - |
| chr1 | 29518804 | 29518923 | CSAR_peak_ | 17.37,6.1        | - |
| chr1 | 29518928 | 29518985 | CSAR_peak_ | 10.94,24.17      | - |
| chr1 | 29519023 | 29519071 | CSAR_peak_ | 12.13,9.58       | - |
| chr1 | 29536272 | 29536381 | CSAR_peak_ | 16.33,8.39       | - |
| chr1 | 29542311 | 29542387 | CSAR_peak_ | 13.51,7.27       | - |
| chr1 | 29555888 | 29555941 | CSAR_peak_ | 6.21             | - |
| chr1 | 29621541 | 29621603 | CSAR_peak_ | 12.13            | - |
| chr1 | 29621699 | 29621742 | CSAR_peak_ | 6.21             | - |
| chr1 | 29622212 | 29622249 | CSAR_peak_ | 9.58             | - |
| chr1 | 29623975 | 29624057 | CSAR_peak_ | 13.48            | - |
| chr1 | 29624767 | 29624813 | CSAR_peak_ | 9.77,7.58        | - |
| chr1 | 29624958 | 29624998 | CSAR_peak_ | 8.39             | - |
| chr1 | 29625911 | 29626029 | CSAR_peak_ | 9.58             | - |
| chr1 | 29626338 | 29626367 | CSAR_peak_ | 6.02             | - |
| chr1 | 29626498 | 29626536 | CSAR_peak_ | 9.58             | - |
| chr1 | 29626961 | 29627013 | CSAR_peak_ | 6.21             | - |
| chr1 | 29627929 | 29627961 | CSAR_peak_ | 6.21             | - |

|      |          |          |             |               |   |
|------|----------|----------|-------------|---------------|---|
| chr1 | 29628685 | 29628757 | CSAR_peak_! | 13.48,6.21    | - |
| chr1 | 29628835 | 29628880 | CSAR_peak_! | 19.36         | - |
| chr1 | 29637049 | 29637101 | CSAR_peak_! | 6.21          | - |
| chr1 | 29637222 | 29637282 | CSAR_peak_! | 17.82         | - |
| chr1 | 29637316 | 29637516 | CSAR_peak_! | 29.2,10.95,1  | - |
| chr1 | 29637589 | 29637741 | CSAR_peak_! | 10.31,13.85   | - |
| chr1 | 29637760 | 29637934 | CSAR_peak_! | 7.58,25.91,6  | - |
| chr1 | 29638009 | 29638284 | CSAR_peak_! | 17.82,7.29,2  | - |
| chr1 | 29638378 | 29638463 | CSAR_peak_! | 20.18,16.77   | - |
| chr1 | 29642134 | 29642225 | CSAR_peak_! | 6.12,9.58,6.0 | - |
| chr1 | 29642226 | 29642310 | CSAR_peak_! | 13.29,26.29   | - |
| chr1 | 29642347 | 29642590 | CSAR_peak_! | 40.66,31.72,  | - |
| chr1 | 29642632 | 29642701 | CSAR_peak_! | 10.83,8.39    | - |
| chr1 | 29642721 | 29642778 | CSAR_peak_! | 6.21          | - |
| chr1 | 29642879 | 29642913 | CSAR_peak_! | 7.58          | - |
| chr1 | 29642938 | 29643151 | CSAR_peak_! | 17.68,19.96   | - |
| chr1 | 29646620 | 29646660 | CSAR_peak_! | 10.83         | - |
| chr1 | 29653180 | 29653241 | CSAR_peak_! | 9.58          | - |
| chr1 | 29669108 | 29669162 | CSAR_peak_! | 7.27          | - |
| chr1 | 29715433 | 29715518 | CSAR_peak_! | 7.27,16.33    | - |
| chr1 | 29715725 | 29715810 | CSAR_peak_! | 8.39,6.21     | - |
| chr1 | 29716108 | 29716193 | CSAR_peak_! | 33.03,9.77    | - |
| chr1 | 29716741 | 29716846 | CSAR_peak_! | 13.92,16.54   | - |
| chr1 | 29716938 | 29717048 | CSAR_peak_! | 13.48         | - |
| chr1 | 29717160 | 29717215 | CSAR_peak_! | 12.13,9.58    | - |
| chr1 | 29717922 | 29717978 | CSAR_peak_! | 7.27          | - |
| chr1 | 29717991 | 29718006 | CSAR_peak_! | 6.1           | - |
| chr1 | 29718214 | 29718280 | CSAR_peak_! | 8.28,19.36    | - |
| chr1 | 29718599 | 29718644 | CSAR_peak_! | 6.21          | - |
| chr1 | 29718650 | 29718697 | CSAR_peak_! | 12.13,6.21    | - |
| chr1 | 29718744 | 29718772 | CSAR_peak_! | 8.39,12.13    | - |
| chr1 | 29718864 | 29718911 | CSAR_peak_! | 8.39,12.17    | - |
| chr1 | 29718928 | 29719007 | CSAR_peak_! | 21.37         | - |
| chr1 | 29719106 | 29719212 | CSAR_peak_! | 31.73,29.2    | - |
| chr1 | 29719261 | 29719312 | CSAR_peak_! | 7.27,12.13    | - |
| chr1 | 29719397 | 29719477 | CSAR_peak_! | 14.88,13.48   | - |
| chr1 | 29719483 | 29719557 | CSAR_peak_! | 17.82,7.27    | - |
| chr1 | 29719717 | 29719854 | CSAR_peak_! | 6.21,19.45,9  | - |
| chr1 | 29719978 | 29720014 | CSAR_peak_! | 15.56         | - |
| chr1 | 29720086 | 29720166 | CSAR_peak_! | 14.93,6.03,4  | - |
| chr1 | 29720201 | 29720267 | CSAR_peak_! | 33.03         | - |
| chr1 | 29720333 | 29720422 | CSAR_peak_! | 14.88,17.82   | - |

|      |          |          |             |                |   |
|------|----------|----------|-------------|----------------|---|
| chr1 | 29720613 | 29720657 | CSAR_peak_  | 14.88,12.13    | - |
| chr1 | 29720721 | 29720816 | CSAR_peak_! | 20.43          | - |
| chr1 | 29720858 | 29720907 | CSAR_peak_  | 6.21           | - |
| chr1 | 29721370 | 29721464 | CSAR_peak_  | 9.77,7.27      | - |
| chr1 | 29721495 | 29721546 | CSAR_peak_  | 6.45           | - |
| chr1 | 29721581 | 29721736 | CSAR_peak_  | 7.27,31.2,6.2  | - |
| chr1 | 29721984 | 29722056 | CSAR_peak_! | 16.08,16.33    | - |
| chr1 | 29722320 | 29722424 | CSAR_peak_  | 25.91,19.36    | - |
| chr1 | 29722427 | 29722470 | CSAR_peak_  | 16.05          | - |
| chr1 | 29722559 | 29722608 | CSAR_peak_  | 24.21          | - |
| chr1 | 29722718 | 29722815 | CSAR_peak_  | 7.58           | - |
| chr1 | 29722875 | 29722951 | CSAR_peak_! | 8.39,19.36     | - |
| chr1 | 29723117 | 29723167 | CSAR_peak_  | 9.58,12.13     | - |
| chr1 | 29723337 | 29723394 | CSAR_peak_  | 8.61,14.92     | - |
| chr1 | 29723516 | 29723555 | CSAR_peak_! | 11.63,6.87     | - |
| chr1 | 29723791 | 29723854 | CSAR_peak_  | 12.17          | - |
| chr1 | 29723959 | 29724125 | CSAR_peak_! | 13,26.69,12.:  | - |
| chr1 | 29724352 | 29724417 | CSAR_peak_  | 7.92           | - |
| chr1 | 29725814 | 29725873 | CSAR_peak_! | 15.2,7.58      | - |
| chr1 | 29727746 | 29727797 | CSAR_peak_! | 8.39           | - |
| chr1 | 29729514 | 29729570 | CSAR_peak_  | 7.27           | - |
| chr1 | 29749436 | 29749546 | CSAR_peak_! | 9.58,14.88     | - |
| chr1 | 29749666 | 29749720 | CSAR_peak_! | 7.27           | - |
| chr1 | 29751384 | 29751587 | CSAR_peak_  | 7.27,8.39,12.- | - |
| chr1 | 29751922 | 29751986 | CSAR_peak_  | 9.58,7.27      | - |
| chr1 | 29752124 | 29752158 | CSAR_peak_  | 6.21           | - |
| chr1 | 29752418 | 29752447 | CSAR_peak_! | 8.95           | - |
| chr1 | 29752924 | 29752963 | CSAR_peak_! | 8.39           | - |
| chr1 | 29804630 | 29804709 | CSAR_peak_  | 18.65,24.21    | - |
| chr1 | 29804715 | 29807418 | CSAR_peak_  | 114.04,49.87-  | - |
| chr1 | 29807439 | 29807667 | CSAR_peak_! | 34.56,69.59    | - |
| chr1 | 29807670 | 29807707 | CSAR_peak_  | 32.23,20.47    | - |
| chr1 | 29807739 | 29808365 | CSAR_peak_! | 85.94,82.28    | - |
| chr1 | 29808376 | 29809502 | CSAR_peak_  | 11.29,84.89,-  | - |
| chr1 | 29819319 | 29819397 | CSAR_peak_  | 14.88,19.36    | - |
| chr1 | 29819701 | 29819808 | CSAR_peak_! | 8.39,7.27      | - |
| chr1 | 29819840 | 29820034 | CSAR_peak_  | 13.66,42.64,-  | - |
| chr1 | 29820599 | 29820641 | CSAR_peak_  | 13.51          | - |
| chr1 | 29820867 | 29820917 | CSAR_peak_! | 14.85          | - |
| chr1 | 29820934 | 29820981 | CSAR_peak_  | 14.76,8.09     | - |
| chr1 | 29821070 | 29821118 | CSAR_peak_  | 12.17,12.31    | - |
| chr1 | 29821124 | 29821201 | CSAR_peak_! | 17.82          | - |



|      |          |          |            |                |   |
|------|----------|----------|------------|----------------|---|
| chr1 | 29821305 | 29821382 | CSAR_peak_ | 8.14,7.27      | - |
| chr1 | 29821497 | 29821543 | CSAR_peak_ | 8.65           | - |
| chr1 | 29821624 | 29821684 | CSAR_peak_ | 19.36          | - |
| chr1 | 29821816 | 29821887 | CSAR_peak_ | 9.48,10.02,9.  | - |
| chr1 | 29821924 | 29821972 | CSAR_peak_ | 8.13           | - |
| chr1 | 29822560 | 29822632 | CSAR_peak_ | 12.17,8.14,5.  | - |
| chr1 | 29822715 | 29822847 | CSAR_peak_ | 6.02,15.9,13.  | - |
| chr1 | 29822972 | 29823025 | CSAR_peak_ | 6.03,8.14      | - |
| chr1 | 29823232 | 29823291 | CSAR_peak_ | 11.38          | - |
| chr1 | 29823446 | 29823484 | CSAR_peak_ | 9.58           | - |
| chr1 | 29823579 | 29823621 | CSAR_peak_ | 9.77           | - |
| chr1 | 29823921 | 29823985 | CSAR_peak_ | 14.88,17.51,1. | - |
| chr1 | 29824026 | 29824035 | CSAR_peak_ | 5.79           | - |
| chr1 | 29824133 | 29824235 | CSAR_peak_ | 24.21,8.28,1.  | - |
| chr1 | 29824597 | 29824700 | CSAR_peak_ | 33.75,12.54    | - |
| chr1 | 29824795 | 29824845 | CSAR_peak_ | 6.21,14.88     | - |
| chr1 | 29824863 | 29824980 | CSAR_peak_ | 6.85,8.39,13.  | - |
| chr1 | 29825097 | 29825146 | CSAR_peak_ | 13.48          | - |
| chr1 | 29825245 | 29825329 | CSAR_peak_ | 8.39,6.21,6.2  | - |
| chr1 | 29826333 | 29826429 | CSAR_peak_ | 9.72,20.18     | - |
| chr1 | 29826547 | 29826584 | CSAR_peak_ | 6.1,6.85       | - |
| chr1 | 29826669 | 29826725 | CSAR_peak_ | 7.92,7.58      | - |
| chr1 | 29826953 | 29827034 | CSAR_peak_ | 10.83,17.82    | - |
| chr1 | 29827057 | 29827088 | CSAR_peak_ | 6.22           | - |
| chr1 | 29827166 | 29827252 | CSAR_peak_ | 21.31,6.78,8.  | - |
| chr1 | 29827776 | 29827807 | CSAR_peak_ | 16.08          | - |
| chr1 | 29827915 | 29827993 | CSAR_peak_ | 6.44,7.92,6.2  | - |
| chr1 | 29828597 | 29828732 | CSAR_peak_ | 14.88,15.68    | - |
| chr1 | 29828769 | 29828821 | CSAR_peak_ | 7.61           | - |
| chr1 | 29829002 | 29829044 | CSAR_peak_ | 12.13          | - |
| chr1 | 29829086 | 29829136 | CSAR_peak_ | 20.94          | - |
| chr1 | 29829303 | 29829372 | CSAR_peak_ | 13.33          | - |
| chr1 | 29829445 | 29829515 | CSAR_peak_ | 26.37,8.52     | - |
| chr1 | 29829899 | 29829986 | CSAR_peak_ | 14.88,8.65     | - |
| chr1 | 29830077 | 29830114 | CSAR_peak_ | 5.86           | - |
| chr1 | 29830141 | 29830198 | CSAR_peak_ | 14.76          | - |
| chr1 | 29830642 | 29830746 | CSAR_peak_ | 7.58,24.21,9.  | - |
| chr1 | 29831076 | 29831154 | CSAR_peak_ | 18.73,7.36,8.  | - |
| chr1 | 29831240 | 29831321 | CSAR_peak_ | 12.35,7.73     | - |
| chr1 | 29831508 | 29831553 | CSAR_peak_ | 14.76          | - |
| chr1 | 29831643 | 29831736 | CSAR_peak_ | 21.1           | - |
| chr1 | 29831811 | 29831940 | CSAR_peak_ | 16.33,20.94    | - |

|      |          |          |             |                |   |
|------|----------|----------|-------------|----------------|---|
| chr1 | 29832089 | 29832188 | CSAR_peak_  | 12.31,25.62    | - |
| chr1 | 29832297 | 29832359 | CSAR_peak_  | 10.83          | - |
| chr1 | 29845659 | 29845707 | CSAR_peak_! | 6.03           | - |
| chr1 | 29845928 | 29845951 | CSAR_peak_! | 9.77,10.83     | - |
| chr1 | 29846019 | 29846054 | CSAR_peak_  | 7.27           | - |
| chr1 | 29846174 | 29846247 | CSAR_peak_! | 20.43,7.58     | - |
| chr1 | 29846426 | 29846501 | CSAR_peak_! | 17.82          | - |
| chr1 | 29846594 | 29846694 | CSAR_peak_! | 16.11,9.58     | - |
| chr1 | 29846913 | 29846945 | CSAR_peak_! | 8.39           | - |
| chr1 | 29847213 | 29847298 | CSAR_peak_! | 12.13          | - |
| chr1 | 29848452 | 29848505 | CSAR_peak_  | 6.21,8.39      | - |
| chr1 | 29849118 | 29849185 | CSAR_peak_  | 6.21,12.13     | - |
| chr1 | 29849628 | 29849680 | CSAR_peak_! | 8.39           | - |
| chr1 | 29849998 | 29850051 | CSAR_peak_! | 14.76          | - |
| chr1 | 29850156 | 29850263 | CSAR_peak_  | 8.14,5.86,9.5- |   |
| chr1 | 29850527 | 29850583 | CSAR_peak_! | 8.39,8.28      | - |
| chr1 | 29850831 | 29850890 | CSAR_peak_! | 12.13,10.83    | - |
| chr1 | 29852171 | 29852193 | CSAR_peak_  | 9.58           | - |
| chr1 | 29882504 | 29882564 | CSAR_peak_  | 17.82          | - |
| chr1 | 29882566 | 29882626 | CSAR_peak_  | 8.14           | - |
| chr1 | 29882832 | 29882921 | CSAR_peak_  | 16.33,6.81,9.- |   |
| chr1 | 29882972 | 29883131 | CSAR_peak_! | 14.76,6.02,1(- |   |
| chr1 | 29883190 | 29883305 | CSAR_peak_  | 26.69,10.96,(- |   |
| chr1 | 29883387 | 29883418 | CSAR_peak_! | 13.48          | - |
| chr1 | 29883456 | 29883492 | CSAR_peak_  | 8.65           | - |
| chr1 | 29884203 | 29884307 | CSAR_peak_  | 7.92,8.39,8.2- |   |
| chr1 | 29884527 | 29884621 | CSAR_peak_  | 8.12,15.43,7.- |   |
| chr1 | 29884705 | 29884722 | CSAR_peak_  | 7.58           | - |
| chr1 | 29884904 | 29884960 | CSAR_peak_  | 9.58,12.13     | - |
| chr1 | 29885181 | 29885224 | CSAR_peak_  | 6.21           | - |
| chr1 | 29885407 | 29885528 | CSAR_peak_! | 12.31,17.19,(- |   |
| chr1 | 29885556 | 29885665 | CSAR_peak_  | 6.44,30.21,2(- |   |
| chr1 | 29885672 | 29885731 | CSAR_peak_  | 6.21           | - |
| chr1 | 29885990 | 29886126 | CSAR_peak_! | 19.36,11.66,(- |   |
| chr1 | 29886157 | 29886337 | CSAR_peak_! | 8.39,12.74,2(- |   |
| chr1 | 29886617 | 29886708 | CSAR_peak_! | 9.58,11.14     | - |
| chr1 | 29886799 | 29886913 | CSAR_peak_! | 9.61,19.36,7.- |   |
| chr1 | 29911240 | 29911402 | CSAR_peak_  | 37.82,19.68,(- |   |
| chr1 | 29911422 | 29911431 | CSAR_peak_  | 6.21           | - |
| chr1 | 29911433 | 29911581 | CSAR_peak_  | 137.12,8.28,(- |   |
| chr1 | 29911621 | 29911710 | CSAR_peak_! | 18.26,7.8,7.7- |   |
| chr1 | 29911736 | 29911834 | CSAR_peak_  | 20.22,47.38,(- |   |

|      |          |          |             |                |   |
|------|----------|----------|-------------|----------------|---|
| chr1 | 29917029 | 29917060 | CSAR_peak_! | 6.03           | - |
| chr1 | 29923531 | 29923656 | CSAR_peak_! | 35.85,63.68,;- |   |
| chr1 | 29926298 | 29926313 | CSAR_peak_! | 7.58           | - |
| chr1 | 29934200 | 29934319 | CSAR_peak_! | 5.86           | - |
| chr1 | 29934623 | 29934706 | CSAR_peak_! | 12.13,13.48    | - |
| chr1 | 29934753 | 29934828 | CSAR_peak_! | 12.13          | - |
| chr1 | 29950515 | 29950587 | CSAR_peak_! | 10.83,17.82    | - |
| chr1 | 29950645 | 29950703 | CSAR_peak_! | 8.39,7.27      | - |
| chr1 | 29951030 | 29951074 | CSAR_peak_! | 9.58           | - |
| chr1 | 29951307 | 29951358 | CSAR_peak_! | 12.13          | - |
| chr1 | 29951884 | 29951935 | CSAR_peak_! | 8.39           | - |
| chr1 | 29952015 | 29952061 | CSAR_peak_! | 7.36           | - |
| chr1 | 29952093 | 29952139 | CSAR_peak_! | 7.92,7.58      | - |
| chr1 | 29952384 | 29952443 | CSAR_peak_! | 13.48          | - |
| chr1 | 29953325 | 29953334 | CSAR_peak_! | 6.21,13.48     | - |
| chr1 | 29953451 | 29953505 | CSAR_peak_! | 7.27,17.82,1(- |   |
| chr1 | 29957093 | 29957138 | CSAR_peak_! | 12.13          | - |
| chr1 | 29964132 | 29964201 | CSAR_peak_! | 7.27           | - |
| chr1 | 29964993 | 29965101 | CSAR_peak_! | 6.02           | - |
| chr1 | 29973369 | 29973427 | CSAR_peak_! | 6.45           | - |
| chr1 | 29973509 | 29973539 | CSAR_peak_! | 7.27           | - |
| chr1 | 29973573 | 29973635 | CSAR_peak_! | 9.58           | - |
| chr1 | 29973711 | 29973754 | CSAR_peak_! | 7.58           | - |
| chr1 | 29974651 | 29974723 | CSAR_peak_! | 13.48          | - |
| chr1 | 29977842 | 29977906 | CSAR_peak_! | 8.39           | - |
| chr1 | 29978046 | 29978077 | CSAR_peak_! | 7.27           | - |
| chr1 | 29978203 | 29978276 | CSAR_peak_! | 8.2,10.95      | - |
| chr1 | 29990479 | 29990529 | CSAR_peak_! | 17.82,12.13    | - |
| chr1 | 29990576 | 29990861 | CSAR_peak_! | 31.2,10.31,1(- |   |
| chr1 | 29991040 | 29991084 | CSAR_peak_! | 6.21           | - |
| chr1 | 29991343 | 29991433 | CSAR_peak_! | 9.58,14.88     | - |
| chr1 | 29991530 | 29991666 | CSAR_peak_! | 22.58,14.22,(- |   |
| chr1 | 29991811 | 29991831 | CSAR_peak_! | 7.92           | - |
| chr1 | 29991875 | 29992000 | CSAR_peak_! | 10.83,6.21,9.- |   |
| chr1 | 29992077 | 29992204 | CSAR_peak_! | 25.63,24.16    | - |
| chr1 | 29992634 | 29992727 | CSAR_peak_! | 9.1,23.9,21.5- |   |
| chr1 | 29992850 | 29992905 | CSAR_peak_! | 12.13          | - |
| chr1 | 29993080 | 29993119 | CSAR_peak_! | 13.48          | - |
| chr1 | 29993133 | 29993157 | CSAR_peak_! | 7.58,6.81      | - |
| chr1 | 29993309 | 29993439 | CSAR_peak_! | 27.48,23.98,;- |   |
| chr1 | 29993486 | 29993543 | CSAR_peak_! | 8.95           | - |
| chr1 | 29993566 | 29993672 | CSAR_peak_! | 20.43          | - |

|      |          |          |             |                |   |
|------|----------|----------|-------------|----------------|---|
| chr1 | 30000739 | 30000847 | CSAR_peak_! | 11.63          | - |
| chr1 | 30000872 | 30000912 | CSAR_peak_! | 8.39           | - |
| chr1 | 30000984 | 30001044 | CSAR_peak_! | 14.76,17.51    | - |
| chr1 | 30001057 | 30001165 | CSAR_peak_! | 17.82,16.33    | - |
| chr1 | 30001377 | 30001433 | CSAR_peak_! | 19.36          | - |
| chr1 | 30001872 | 30001976 | CSAR_peak_! | 12.13          | - |
| chr1 | 30002774 | 30002942 | CSAR_peak_! | 6.21,12.5,6.1  | - |
| chr1 | 30003058 | 30003120 | CSAR_peak_! | 7.27           | - |
| chr1 | 30003497 | 30003557 | CSAR_peak_! | 13.48          | - |
| chr1 | 30004532 | 30004698 | CSAR_peak_! | 32.83,28.96    | - |
| chr1 | 30005084 | 30005141 | CSAR_peak_! | 12.31,6.85     | - |
| chr1 | 30005473 | 30005516 | CSAR_peak_! | 7.27           | - |
| chr1 | 30006597 | 30006669 | CSAR_peak_! | 12.17,12.13    | - |
| chr1 | 30006715 | 30006754 | CSAR_peak_! | 7.27           | - |
| chr1 | 30007687 | 30007749 | CSAR_peak_! | 6.21,7.27      | - |
| chr1 | 30007879 | 30007909 | CSAR_peak_! | 6.21           | - |
| chr1 | 30007945 | 30007993 | CSAR_peak_! | 6.85           | - |
| chr1 | 30008049 | 30008212 | CSAR_peak_! | 29.69,16.11    | - |
| chr1 | 30008322 | 30008375 | CSAR_peak_! | 9.61,6.57      | - |
| chr1 | 30008697 | 30008738 | CSAR_peak_! | 9.58           | - |
| chr1 | 30008869 | 30008932 | CSAR_peak_! | 17.37          | - |
| chr1 | 30009007 | 30009126 | CSAR_peak_! | 18.61,8.14,3.4 | - |
| chr1 | 30009176 | 30009250 | CSAR_peak_! | 19.36,23.03    | - |
| chr1 | 30009542 | 30009619 | CSAR_peak_! | 7.27,9.77      | - |
| chr1 | 30009703 | 30009786 | CSAR_peak_! | 12.13          | - |
| chr1 | 30009881 | 30009932 | CSAR_peak_! | 16.33          | - |
| chr1 | 30010089 | 30010151 | CSAR_peak_! | 17.37,6.03,7.1 | - |
| chr1 | 30010236 | 30010260 | CSAR_peak_! | 9.41,10.02     | - |
| chr1 | 30010481 | 30010539 | CSAR_peak_! | 6.57           | - |
| chr1 | 30010580 | 30010617 | CSAR_peak_! | 7.27           | - |
| chr1 | 30016535 | 30016625 | CSAR_peak_! | 7.27           | - |
| chr1 | 30017094 | 30017108 | CSAR_peak_! | 8.39,7.58      | - |
| chr1 | 30017185 | 30017228 | CSAR_peak_! | 17.82,12.17    | - |
| chr1 | 30017261 | 30017273 | CSAR_peak_! | 6.57           | - |
| chr1 | 30017372 | 30017437 | CSAR_peak_! | 6.57,5.86,6.2  | - |
| chr1 | 30017530 | 30017578 | CSAR_peak_! | 9.77           | - |
| chr1 | 30017836 | 30017936 | CSAR_peak_! | 5.86,25.91,1.0 | - |
| chr1 | 30018093 | 30018192 | CSAR_peak_! | 9.77,14.88     | - |
| chr1 | 30024014 | 30024099 | CSAR_peak_! | 6.21,12.13     | - |
| chr1 | 30024729 | 30024777 | CSAR_peak_! | 7.27           | - |
| chr1 | 30025273 | 30025330 | CSAR_peak_! | 8.39           | - |
| chr1 | 30027709 | 30027762 | CSAR_peak_! | 9.58,12.13     | - |

|      |          |          |             |               |   |
|------|----------|----------|-------------|---------------|---|
| chr1 | 30028182 | 30028246 | CSAR_peak_! | 6.1,5.62      | - |
| chr1 | 30028266 | 30028408 | CSAR_peak_! | 8.9,7.27,6.8  | - |
| chr1 | 30028475 | 30028516 | CSAR_peak_! | 8.13,6.21,6.2 | - |
| chr1 | 30028535 | 30028609 | CSAR_peak_! | 6.85,17.51    | - |
| chr1 | 30028658 | 30028706 | CSAR_peak_! | 9.58          | - |
| chr1 | 30028752 | 30028798 | CSAR_peak_! | 9.58          | - |
| chr1 | 30028814 | 30028910 | CSAR_peak_! | 19.36         | - |
| chr1 | 30028957 | 30029034 | CSAR_peak_! | 6.85,13.66    | - |
| chr1 | 30029211 | 30029315 | CSAR_peak_! | 19.36,9.58    | - |
| chr1 | 30029549 | 30029668 | CSAR_peak_! | 18.2,19.96    | - |
| chr1 | 30029725 | 30029764 | CSAR_peak_! | 6.03          | - |
| chr1 | 30029888 | 30029949 | CSAR_peak_! | 12.74         | - |
| chr1 | 30030036 | 30030114 | CSAR_peak_! | 12.31,7.27    | - |
| chr1 | 30030425 | 30030475 | CSAR_peak_! | 6.21,5.86     | - |
| chr1 | 30030578 | 30030659 | CSAR_peak_! | 7.18,9.03,6.5 | - |
| chr1 | 30030752 | 30030863 | CSAR_peak_! | 20.94,16.33   | - |
| chr1 | 30031071 | 30031087 | CSAR_peak_! | 6.21,6.44     | - |
| chr1 | 30031197 | 30031259 | CSAR_peak_! | 12.13         | - |
| chr1 | 30031404 | 30031504 | CSAR_peak_! | 8.53,7.7      | - |
| chr1 | 30031611 | 30031686 | CSAR_peak_! | 19.36,17.82   | - |
| chr1 | 30031807 | 30031879 | CSAR_peak_! | 16.33,17.52   | - |
| chr1 | 30031961 | 30032058 | CSAR_peak_! | 16.33,9.77    | - |
| chr1 | 30032598 | 30032692 | CSAR_peak_! | 9.58          | - |
| chr1 | 30032772 | 30032853 | CSAR_peak_! | 10.95,9.58    | - |
| chr1 | 30046637 | 30046748 | CSAR_peak_! | 8.39          | - |
| chr1 | 30059887 | 30060000 | CSAR_peak_! | 9.58          | - |
| chr1 | 30063783 | 30063841 | CSAR_peak_! | 6.94          | - |
| chr1 | 30064500 | 30064564 | CSAR_peak_! | 10.82,7.58    | - |
| chr1 | 30064611 | 30064647 | CSAR_peak_! | 7.27          | - |
| chr1 | 30064731 | 30064781 | CSAR_peak_! | 7.27          | - |
| chr1 | 30064817 | 30064876 | CSAR_peak_! | 6.21          | - |
| chr1 | 30064893 | 30064947 | CSAR_peak_! | 14.88         | - |
| chr1 | 30066662 | 30066712 | CSAR_peak_! | 9.58          | - |
| chr1 | 30101491 | 30101594 | CSAR_peak_! | 10.83         | - |
| chr1 | 30102008 | 30102115 | CSAR_peak_! | 13.48,6.21    | - |
| chr1 | 30103728 | 30103792 | CSAR_peak_! | 8.39          | - |
| chr1 | 30105045 | 30105085 | CSAR_peak_! | 8.39          | - |
| chr1 | 30105413 | 30105444 | CSAR_peak_! | 8.39          | - |
| chr1 | 30105594 | 30105693 | CSAR_peak_! | 17.68,6.95    | - |
| chr1 | 30105864 | 30105974 | CSAR_peak_! | 12.13,14.88   | - |
| chr1 | 30106063 | 30106171 | CSAR_peak_! | 16.19,9.58    | - |
| chr1 | 30107020 | 30107142 | CSAR_peak_! | 13.85,7.58    | - |

|      |          |          |             |                |   |
|------|----------|----------|-------------|----------------|---|
| chr1 | 30107149 | 30107216 | CSAR_peak_! | 9.58           | - |
| chr1 | 30108157 | 30108210 | CSAR_peak_! | 14.76          | - |
| chr1 | 30108571 | 30108616 | CSAR_peak_! | 7.27,8.39      | - |
| chr1 | 30109476 | 30109610 | CSAR_peak_! | 16.77,12.13    | - |
| chr1 | 30109675 | 30109755 | CSAR_peak_! | 26.69,8.65     | - |
| chr1 | 30110307 | 30110443 | CSAR_peak_! | 12.13,8.65,7.  | - |
| chr1 | 30110567 | 30110637 | CSAR_peak_! | 12.13,13.44    | - |
| chr1 | 30110697 | 30110702 | CSAR_peak_! | 7.27           | - |
| chr1 | 30112210 | 30112277 | CSAR_peak_! | 9.77,8.52      | - |
| chr1 | 30112445 | 30112525 | CSAR_peak_! | 12.13,6.81,8.  | - |
| chr1 | 30113003 | 30113097 | CSAR_peak_! | 16.33          | - |
| chr1 | 30157239 | 30157361 | CSAR_peak_! | 12.31          | - |
| chr1 | 30163330 | 30163412 | CSAR_peak_! | 9.77,6.21      | - |
| chr1 | 30163459 | 30163517 | CSAR_peak_! | 9.58           | - |
| chr1 | 30163572 | 30163619 | CSAR_peak_! | 7.27           | - |
| chr1 | 30163689 | 30163700 | CSAR_peak_! | 6.21           | - |
| chr1 | 30164113 | 30164205 | CSAR_peak_! | 12.74          | - |
| chr1 | 30164462 | 30164501 | CSAR_peak_! | 6.21           | - |
| chr1 | 30164978 | 30165019 | CSAR_peak_! | 6.21           | - |
| chr1 | 30165149 | 30165203 | CSAR_peak_! | 7.27           | - |
| chr1 | 30209530 | 30209579 | CSAR_peak_! | 8.39           | - |
| chr1 | 30210594 | 30210631 | CSAR_peak_! | 7.27           | - |
| chr1 | 30227980 | 30228052 | CSAR_peak_! | 10.33          | - |
| chr1 | 30228334 | 30228431 | CSAR_peak_! | 12.13,12.31    | - |
| chr1 | 30228514 | 30228588 | CSAR_peak_! | 7.27,7.27      | - |
| chr1 | 30228845 | 30228921 | CSAR_peak_! | 16.78,14.88,.- | - |
| chr1 | 30228944 | 30228949 | CSAR_peak_! | 7.27           | - |
| chr1 | 30229079 | 30229148 | CSAR_peak_! | 10.02,24.21    | - |
| chr1 | 30229488 | 30229542 | CSAR_peak_! | 9.58           | - |
| chr1 | 30229596 | 30229699 | CSAR_peak_! | 6.81,20.94,1!  | - |
| chr1 | 30230049 | 30230085 | CSAR_peak_! | 6.85           | - |
| chr1 | 30230245 | 30230259 | CSAR_peak_! | 6.21           | - |
| chr1 | 30230302 | 30230351 | CSAR_peak_! | 12.17          | - |
| chr1 | 30230429 | 30230558 | CSAR_peak_! | 14.88,7.27     | - |
| chr1 | 30230823 | 30230865 | CSAR_peak_! | 9.58           | - |
| chr1 | 30231533 | 30231602 | CSAR_peak_! | 8.09,6.87      | - |
| chr1 | 30232784 | 30232883 | CSAR_peak_! | 26.69,20.05    | - |
| chr1 | 30233280 | 30233319 | CSAR_peak_! | 7.27           | - |
| chr1 | 30233630 | 30233642 | CSAR_peak_! | 7.27           | - |
| chr1 | 30233749 | 30233832 | CSAR_peak_! | 23.49,26.69    | - |
| chr1 | 30234216 | 30234227 | CSAR_peak_! | 12.13          | - |
| chr1 | 30234242 | 30234293 | CSAR_peak_! | 8.39           | - |

|      |          |          |             |                |   |
|------|----------|----------|-------------|----------------|---|
| chr1 | 30235478 | 30235557 | CSAR_peak_! | 9.77,7.29      | - |
| chr1 | 30235682 | 30235729 | CSAR_peak_! | 7.27,8.39      | - |
| chr1 | 30235856 | 30235943 | CSAR_peak_! | 7.27,5.86      | - |
| chr1 | 30236484 | 30236549 | CSAR_peak_! | 7.58,8.39      | - |
| chr1 | 30236555 | 30236596 | CSAR_peak_! | 12.13          | - |
| chr1 | 30236686 | 30236701 | CSAR_peak_! | 6.21           | - |
| chr1 | 30237009 | 30237147 | CSAR_peak_! | 28.62          | - |
| chr1 | 30247965 | 30248016 | CSAR_peak_! | 7.27           | - |
| chr1 | 30249016 | 30249063 | CSAR_peak_! | 8.39           | - |
| chr1 | 30258303 | 30258343 | CSAR_peak_! | 7.27           | - |
| chr1 | 30258462 | 30258515 | CSAR_peak_! | 9.58           | - |
| chr1 | 30258620 | 30258625 | CSAR_peak_! | 6.21           | - |
| chr1 | 30259037 | 30259113 | CSAR_peak_! | 10.02,20.13    | - |
| chr1 | 30259230 | 30259240 | CSAR_peak_! | 11.14          | - |
| chr1 | 30259577 | 30259624 | CSAR_peak_! | 7.27           | - |
| chr1 | 30259984 | 30260012 | CSAR_peak_! | 6.21           | - |
| chr1 | 30260089 | 30260122 | CSAR_peak_! | 5.86           | - |
| chr1 | 30260318 | 30260368 | CSAR_peak_! | 9.58           | - |
| chr1 | 30262024 | 30262065 | CSAR_peak_! | 6.57           | - |
| chr1 | 30262707 | 30262812 | CSAR_peak_! | 9.77,9.58,7.9- | - |
| chr1 | 30263058 | 30263139 | CSAR_peak_! | 5.86,13.48,1(- | - |
| chr1 | 30263484 | 30263514 | CSAR_peak_! | 10.95          | - |
| chr1 | 30263618 | 30263708 | CSAR_peak_! | 16.19,9.58,6.- | - |
| chr1 | 30264357 | 30264425 | CSAR_peak_! | 12.17,6.44     | - |
| chr1 | 30264587 | 30264621 | CSAR_peak_! | 9.41           | - |
| chr1 | 30299640 | 30299690 | CSAR_peak_! | 10.83          | - |
| chr1 | 30300205 | 30300249 | CSAR_peak_! | 6.21           | - |
| chr1 | 30300983 | 30301051 | CSAR_peak_! | 16.33          | - |
| chr1 | 30301195 | 30301256 | CSAR_peak_! | 14.88          | - |
| chr1 | 30301603 | 30301666 | CSAR_peak_! | 13.48,5.86     | - |
| chr1 | 30309209 | 30309260 | CSAR_peak_! | 9.58           | - |
| chr1 | 30375207 | 30375234 | CSAR_peak_! | 7.27           | - |
| chr1 | 30389777 | 30389819 | CSAR_peak_! | 8.13           | - |
| chr1 | 30398397 | 30398539 | CSAR_peak_! | 12.13,9.58     | - |
| chr1 | 30398804 | 30398882 | CSAR_peak_! | 15.43,15.28    | - |
| chr1 | 30399079 | 30399147 | CSAR_peak_! | 11.07,10.17    | - |
| chr1 | 30401515 | 30401607 | CSAR_peak_! | 16.33,7.27     | - |
| chr1 | 30401860 | 30401905 | CSAR_peak_! | 7.27           | - |
| chr1 | 30401943 | 30401990 | CSAR_peak_! | 7.27           | - |
| chr1 | 30402009 | 30402085 | CSAR_peak_! | 18.95,7.92     | - |
| chr1 | 30402106 | 30402309 | CSAR_peak_! | 42.59,20.43,-  | - |
| chr1 | 30402335 | 30402402 | CSAR_peak_! | 13.48,12.31    | - |

|      |          |          |             |                |   |
|------|----------|----------|-------------|----------------|---|
| chr1 | 30402415 | 30402542 | CSAR_peak_! | 46.67,25.62    | - |
| chr1 | 30402823 | 30402873 | CSAR_peak_! | 8.39           | - |
| chr1 | 30403043 | 30403097 | CSAR_peak_! | 14.88,8.39     | - |
| chr1 | 30403416 | 30403478 | CSAR_peak_! | 7.27,7.27      | - |
| chr1 | 30403724 | 30403818 | CSAR_peak_! | 16.08          | - |
| chr1 | 30403942 | 30403990 | CSAR_peak_! | 15.57,7.76     | - |
| chr1 | 30404006 | 30404084 | CSAR_peak_! | 11.82,35.7,6.  | - |
| chr1 | 30404137 | 30404398 | CSAR_peak_! | 5.67,23.95,2!  | - |
| chr1 | 30404446 | 30404592 | CSAR_peak_! | 28.49,15.3     | - |
| chr1 | 30404627 | 30404676 | CSAR_peak_! | 9.58,42.64     | - |
| chr1 | 30405582 | 30405631 | CSAR_peak_! | 7.58,7.58      | - |
| chr1 | 30405940 | 30406029 | CSAR_peak_! | 6.95,7.27      | - |
| chr1 | 30406635 | 30406661 | CSAR_peak_! | 9.58           | - |
| chr1 | 30406812 | 30406911 | CSAR_peak_! | 6.21           | - |
| chr1 | 30406925 | 30406951 | CSAR_peak_! | 8.09           | - |
| chr1 | 30407016 | 30407114 | CSAR_peak_! | 5.67,26.05     | - |
| chr1 | 30407289 | 30407390 | CSAR_peak_! | 5.86,6.81      | - |
| chr1 | 30407856 | 30407900 | CSAR_peak_! | 22.56          | - |
| chr1 | 30408601 | 30408826 | CSAR_peak_! | 9.77,12.13,8.  | - |
| chr1 | 30408832 | 30408936 | CSAR_peak_! | 11.03,8.39     | - |
| chr1 | 30408943 | 30409009 | CSAR_peak_! | 6.94           | - |
| chr1 | 30409040 | 30409423 | CSAR_peak_! | 7,12.13,6.81,- | - |
| chr1 | 30409457 | 30409501 | CSAR_peak_! | 7.27           | - |
| chr1 | 30412858 | 30412910 | CSAR_peak_! | 9.58,17.82     | - |
| chr1 | 30414033 | 30414083 | CSAR_peak_! | 7.58,6.57      | - |
| chr2 | 1136     | 1217     | CSAR_peak_! | 6.11,60.02,6.+ |   |
| chr2 | 1229     | 1268     | CSAR_peak_! | 13.51          | + |
| chr2 | 1458     | 1511     | CSAR_peak_! | 91.47,19.49    | + |
| chr2 | 1928     | 2015     | CSAR_peak_! | 5.93,8.06      | + |
| chr2 | 2092     | 2269     | CSAR_peak_! | 6.22,36.54,6!  | + |
| chr2 | 2353     | 2402     | CSAR_peak_! | 18.08          | + |
| chr2 | 2457     | 2515     | CSAR_peak_! | 9.88,17.19     | + |
| chr2 | 2728     | 2795     | CSAR_peak_! | 48.01,21.84    | + |
| chr2 | 3227     | 3322     | CSAR_peak_! | 305.52,154.4+  |   |
| chr2 | 3380     | 3475     | CSAR_peak_! | 144.47,48.33+  |   |
| chr2 | 3479     | 3598     | CSAR_peak_! | 849.3,285.2,!  | + |
| chr2 | 3663     | 3706     | CSAR_peak_! | 127.26,27.78+  |   |
| chr2 | 3761     | 3788     | CSAR_peak_! | 10.16,8.92     | + |
| chr2 | 5372     | 5450     | CSAR_peak_! | 614.95,750.2+  |   |
| chr2 | 5509     | 5559     | CSAR_peak_! | 17.95,9.24     | + |
| chr2 | 5601     | 5672     | CSAR_peak_! | 65.98,8.16     | + |
| chr2 | 5687     | 5699     | CSAR_peak_! | 8.7            | + |



|      |        |                   |                |
|------|--------|-------------------|----------------|
| chr2 | 5714   | 5735 CSAR_peak_   | 18.72 +        |
| chr2 | 5748   | 6041 CSAR_peak_   | 158.76,392.7+  |
| chr2 | 6107   | 6667 CSAR_peak_   | 202.78,162.9+  |
| chr2 | 6678   | 7025 CSAR_peak_   | 807.14,167.8+  |
| chr2 | 7068   | 7092 CSAR_peak_   | 6.44,15.3 +    |
| chr2 | 7095   | 7147 CSAR_peak_   | 124.13,113.3+  |
| chr2 | 7233   | 7351 CSAR_peak_   | 96.8,342.84,+  |
| chr2 | 7359   | 7363 CSAR_peak_   | 12.77,10.78 +  |
| chr2 | 7441   | 7573 CSAR_peak_   | 436.93,656.0+  |
| chr2 | 7677   | 7982 CSAR_peak_   | 37.7,2017.07+  |
| chr2 | 7992   | 8037 CSAR_peak_   | 33.14,44.7 +   |
| chr2 | 8081   | 8138 CSAR_peak_   | 385.93,861.7+  |
| chr2 | 8164   | 8236 CSAR_peak_   | 1160.65,28.0+  |
| chr2 | 8296   | 8309 CSAR_peak_   | 6.81,8.63 +    |
| chr2 | 8471   | 8557 CSAR_peak_   | 70.01,79.01,(+ |
| chr2 | 8564   | 8760 CSAR_peak_   | 111.91,146.5+  |
| chr2 | 8835   | 8843 CSAR_peak_   | 7.26 +         |
| chr2 | 8896   | 8919 CSAR_peak_   | 38,20.67 +     |
| chr2 | 9131   | 9180 CSAR_peak_   | 25.42,21.16 +  |
| chr2 | 9186   | 9346 CSAR_peak_   | 52.77,127.45+  |
| chr2 | 9371   | 9461 CSAR_peak_   | 72.8,82 +      |
| chr2 | 9490   | 9525 CSAR_peak_   | 41.94 +        |
| chr2 | 9704   | 9747 CSAR_peak_   | 6.03 +         |
| chr2 | 9959   | 10021 CSAR_peak_  | 8.39,9.97 +    |
| chr2 | 10047  | 10112 CSAR_peak_  | 12.17,13.44 +  |
| chr2 | 10480  | 10507 CSAR_peak_  | 6.95 +         |
| chr2 | 79963  | 80013 CSAR_peak_  | 6.57 +         |
| chr2 | 82110  | 82158 CSAR_peak_  | 8.65 +         |
| chr2 | 82243  | 82296 CSAR_peak_  | 6.57,5.62 +    |
| chr2 | 82645  | 82737 CSAR_peak_  | 10.95 +        |
| chr2 | 117251 | 117312 CSAR_peak_ | 12.13 +        |
| chr2 | 123277 | 123321 CSAR_peak_ | 6.21 +         |
| chr2 | 123671 | 123749 CSAR_peak_ | 6.21 +         |
| chr2 | 124065 | 124093 CSAR_peak_ | 8.39 +         |
| chr2 | 124100 | 124126 CSAR_peak_ | 6.95,11.28 +   |
| chr2 | 124202 | 124259 CSAR_peak_ | 7.13,8.69 +    |
| chr2 | 124659 | 124698 CSAR_peak_ | 6.21 +         |
| chr2 | 142004 | 142040 CSAR_peak_ | 6.21 +         |
| chr2 | 206543 | 206588 CSAR_peak_ | 7.27 +         |
| chr2 | 206602 | 206649 CSAR_peak_ | 6.21 +         |
| chr2 | 207569 | 207629 CSAR_peak_ | 7.27 +         |
| chr2 | 207657 | 207692 CSAR_peak_ | 6.21 +         |

|      |        |        |            |               |   |
|------|--------|--------|------------|---------------|---|
| chr2 | 211564 | 211605 | CSAR_peak_ | 6.21          | + |
| chr2 | 235973 | 236077 | CSAR_peak_ | 7.47          | + |
| chr2 | 236137 | 236179 | CSAR_peak_ | 12.13         | + |
| chr2 | 239804 | 239813 | CSAR_peak_ | 8.95          | + |
| chr2 | 239942 | 240152 | CSAR_peak_ | 27.64,14.85,  | + |
| chr2 | 269022 | 269065 | CSAR_peak_ | 8.39,9.58     | + |
| chr2 | 269824 | 269873 | CSAR_peak_ | 6.44,12.31    | + |
| chr2 | 270877 | 270915 | CSAR_peak_ | 7.27          | + |
| chr2 | 271053 | 271086 | CSAR_peak_ | 8.39          | + |
| chr2 | 385497 | 385558 | CSAR_peak_ | 8.39,8.95     | + |
| chr2 | 385722 | 385733 | CSAR_peak_ | 9.58          | + |
| chr2 | 385858 | 385991 | CSAR_peak_ | 11.32,17.82   | + |
| chr2 | 386589 | 386695 | CSAR_peak_ | 12.13,12.13   | + |
| chr2 | 386753 | 386863 | CSAR_peak_ | 6.02,14.88    | + |
| chr2 | 386912 | 387015 | CSAR_peak_ | 6.21          | + |
| chr2 | 387019 | 387037 | CSAR_peak_ | 6.02          | + |
| chr2 | 387066 | 387139 | CSAR_peak_ | 8.52          | + |
| chr2 | 388337 | 388389 | CSAR_peak_ | 7.27          | + |
| chr2 | 388485 | 388535 | CSAR_peak_ | 6.57          | + |
| chr2 | 418714 | 418777 | CSAR_peak_ | 11.14         | + |
| chr2 | 419181 | 419284 | CSAR_peak_ | 17.51,9.76,9. | + |
| chr2 | 419336 | 419354 | CSAR_peak_ | 8.65          | + |
| chr2 | 506296 | 506356 | CSAR_peak_ | 7.27          | + |
| chr2 | 508756 | 508801 | CSAR_peak_ | 6.21          | + |
| chr2 | 528391 | 528458 | CSAR_peak_ | 9.77,10.99    | + |
| chr2 | 528462 | 528480 | CSAR_peak_ | 8.39          | + |
| chr2 | 528627 | 528745 | CSAR_peak_ | 8.18,16.77,1. | + |
| chr2 | 528792 | 528832 | CSAR_peak_ | 8.39          | + |
| chr2 | 528868 | 528948 | CSAR_peak_ | 7.47,10.95    | + |
| chr2 | 528978 | 529074 | CSAR_peak_ | 6.21,17.82    | + |
| chr2 | 561035 | 561123 | CSAR_peak_ | 6.21          | + |
| chr2 | 561237 | 561295 | CSAR_peak_ | 9.77          | + |
| chr2 | 562386 | 562427 | CSAR_peak_ | 9.58          | + |
| chr2 | 621334 | 621372 | CSAR_peak_ | 7.27          | + |
| chr2 | 623014 | 623066 | CSAR_peak_ | 7.58          | + |
| chr2 | 629448 | 629492 | CSAR_peak_ | 9.58          | + |
| chr2 | 630095 | 630150 | CSAR_peak_ | 7.26          | + |
| chr2 | 633199 | 633244 | CSAR_peak_ | 10.95         | + |
| chr2 | 693001 | 693058 | CSAR_peak_ | 6.21          | + |
| chr2 | 774125 | 774177 | CSAR_peak_ | 8.39          | + |
| chr2 | 774239 | 774293 | CSAR_peak_ | 12.17         | + |
| chr2 | 774330 | 774396 | CSAR_peak_ | 8.39          | + |

|      |         |         |            |                |
|------|---------|---------|------------|----------------|
| chr2 | 775057  | 775131  | CSAR_peak_ | 8.28,6.95,6.9+ |
| chr2 | 839527  | 839617  | CSAR_peak_ | 13.48 +        |
| chr2 | 849852  | 849975  | CSAR_peak_ | 60.72,28.42 +  |
| chr2 | 852934  | 853058  | CSAR_peak_ | 61.26,126.91+  |
| chr2 | 942470  | 942509  | CSAR_peak_ | 6.57 +         |
| chr2 | 944426  | 944543  | CSAR_peak_ | 7.27,9.77 +    |
| chr2 | 945209  | 945256  | CSAR_peak_ | 9.58 +         |
| chr2 | 948733  | 948785  | CSAR_peak_ | 6.21 +         |
| chr2 | 953803  | 953958  | CSAR_peak_ | 17.87,15.56 +  |
| chr2 | 953991  | 954047  | CSAR_peak_ | 10.83 +        |
| chr2 | 956483  | 956563  | CSAR_peak_ | 6.21 +         |
| chr2 | 956635  | 956676  | CSAR_peak_ | 9.58 +         |
| chr2 | 957444  | 957492  | CSAR_peak_ | 6.57 +         |
| chr2 | 958049  | 958236  | CSAR_peak_ | 16.08,16.11 +  |
| chr2 | 958493  | 958546  | CSAR_peak_ | 13.44 +        |
| chr2 | 958817  | 958856  | CSAR_peak_ | 6.21 +         |
| chr2 | 1072601 | 1072640 | CSAR_peak_ | 6.57 +         |
| chr2 | 1072761 | 1072840 | CSAR_peak_ | 8.39 +         |
| chr2 | 1073725 | 1073794 | CSAR_peak_ | 6.03 +         |
| chr2 | 1157715 | 1157783 | CSAR_peak_ | 8.28 +         |
| chr2 | 1479131 | 1479142 | CSAR_peak_ | 6.21 +         |
| chr2 | 1479257 | 1479304 | CSAR_peak_ | 9.58 +         |
| chr2 | 1531820 | 1531868 | CSAR_peak_ | 6.21,6.21,5.6+ |
| chr2 | 1532336 | 1532384 | CSAR_peak_ | 6.57 +         |
| chr2 | 1532952 | 1533003 | CSAR_peak_ | 6.95 +         |
| chr2 | 1683882 | 1683925 | CSAR_peak_ | 6.57 +         |
| chr2 | 1712576 | 1712628 | CSAR_peak_ | 7.27 +         |
| chr2 | 1873442 | 1873526 | CSAR_peak_ | 13.48 +        |
| chr2 | 1966828 | 1966949 | CSAR_peak_ | 9.58,6.44,11.+ |
| chr2 | 1967180 | 1967289 | CSAR_peak_ | 9.77,8.39 +    |
| chr2 | 1967293 | 1967369 | CSAR_peak_ | 6.21,19.36 +   |
| chr2 | 1967474 | 1967542 | CSAR_peak_ | 12.6,11.44,1(+ |
| chr2 | 1967592 | 1967745 | CSAR_peak_ | 26.8,34.72 +   |
| chr2 | 1967760 | 1967810 | CSAR_peak_ | 6.1 +          |
| chr2 | 1967919 | 1967985 | CSAR_peak_ | 8.39,6.95 +    |
| chr2 | 1993099 | 1993242 | CSAR_peak_ | 13.85,12.13,+  |
| chr2 | 1993280 | 1993312 | CSAR_peak_ | 6.57 +         |
| chr2 | 1993388 | 1993440 | CSAR_peak_ | 19.36 +        |
| chr2 | 1993485 | 1993924 | CSAR_peak_ | 27.64,15.23,+  |
| chr2 | 1994309 | 1994354 | CSAR_peak_ | 9.77 +         |
| chr2 | 1994355 | 1994386 | CSAR_peak_ | 5.91 +         |
| chr2 | 1994388 | 1994422 | CSAR_peak_ | 8.65,6.57 +    |

|      |         |         |            |               |   |
|------|---------|---------|------------|---------------|---|
| chr2 | 1994835 | 1994919 | CSAR_peak_ | 6.57,6.21     | + |
| chr2 | 1995344 | 1995516 | CSAR_peak_ | 12.13,15.47,  | + |
| chr2 | 2015869 | 2015889 | CSAR_peak_ | 7.92          | + |
| chr2 | 2016157 | 2016243 | CSAR_peak_ | 21.56,7.27    | + |
| chr2 | 2016278 | 2016439 | CSAR_peak_ | 15.89,30.46   | + |
| chr2 | 2026208 | 2026254 | CSAR_peak_ | 6.22          | + |
| chr2 | 2026425 | 2026579 | CSAR_peak_ | 17.4,8.94,20. | + |
| chr2 | 2026586 | 2026629 | CSAR_peak_ | 10.61,19.68   | + |
| chr2 | 2026635 | 2026777 | CSAR_peak_ | 30.72,16.55   | + |
| chr2 | 2026798 | 2026875 | CSAR_peak_ | 8.95,9.58     | + |
| chr2 | 2026980 | 2027067 | CSAR_peak_ | 7.27,17.4     | + |
| chr2 | 2033342 | 2033374 | CSAR_peak_ | 6.21,7.27     | + |
| chr2 | 2033699 | 2033805 | CSAR_peak_ | 14.85,18.73   | + |
| chr2 | 2142946 | 2143002 | CSAR_peak_ | 12.31         | + |
| chr2 | 2143177 | 2143319 | CSAR_peak_ | 16.33,7.34,7. | + |
| chr2 | 2144152 | 2144238 | CSAR_peak_ | 12.13,14.88   | + |
| chr2 | 2144566 | 2144609 | CSAR_peak_ | 8.39          | + |
| chr2 | 2145035 | 2145089 | CSAR_peak_ | 8.39          | + |
| chr2 | 2145092 | 2145134 | CSAR_peak_ | 13.48         | + |
| chr2 | 2145786 | 2145869 | CSAR_peak_ | 9.58,10.02    | + |
| chr2 | 2279534 | 2279605 | CSAR_peak_ | 6.95          | + |
| chr2 | 2323642 | 2323682 | CSAR_peak_ | 7.58,7.27     | + |
| chr2 | 2350432 | 2350540 | CSAR_peak_ | 17.82,7.29,1. | + |
| chr2 | 2350578 | 2350693 | CSAR_peak_ | 9.97,24.15,8. | + |
| chr2 | 2351044 | 2351105 | CSAR_peak_ | 11.28,15.89   | + |
| chr2 | 2351257 | 2351312 | CSAR_peak_ | 12.17         | + |
| chr2 | 2351612 | 2351686 | CSAR_peak_ | 11.99,6.21,1. | + |
| chr2 | 2351706 | 2351749 | CSAR_peak_ | 8.39          | + |
| chr2 | 2353175 | 2353267 | CSAR_peak_ | 10.83,9.58    | + |
| chr2 | 2355283 | 2355325 | CSAR_peak_ | 7.27          | + |
| chr2 | 2763795 | 2763815 | CSAR_peak_ | 8.39          | + |
| chr2 | 2764284 | 2764294 | CSAR_peak_ | 8.39          | + |
| chr2 | 2764469 | 2764561 | CSAR_peak_ | 8.13,13.51    | + |
| chr2 | 2764615 | 2764672 | CSAR_peak_ | 25.91         | + |
| chr2 | 2765091 | 2765112 | CSAR_peak_ | 7.58          | + |
| chr2 | 2765169 | 2765206 | CSAR_peak_ | 6.21          | + |
| chr2 | 2765282 | 2765456 | CSAR_peak_ | 7.34,8.52,7.3 | + |
| chr2 | 2767080 | 2767130 | CSAR_peak_ | 6.21          | + |
| chr2 | 2924638 | 2924676 | CSAR_peak_ | 8.39          | + |
| chr2 | 2925906 | 2925976 | CSAR_peak_ | 9.61          | + |
| chr2 | 2926288 | 2926337 | CSAR_peak_ | 6.78,14.85    | + |
| chr2 | 2926440 | 2926490 | CSAR_peak_ | 9.97          | + |

|      |         |         |            |                |
|------|---------|---------|------------|----------------|
| chr2 | 2927088 | 2927243 | CSAR_peak_ | 9.58,13.92,8.+ |
| chr2 | 2927548 | 2927637 | CSAR_peak_ | 10.83 +        |
| chr2 | 2927649 | 2927680 | CSAR_peak_ | 9.79 +         |
| chr2 | 2927914 | 2927974 | CSAR_peak_ | 7.27,7.34,6.5+ |
| chr2 | 2928364 | 2928396 | CSAR_peak_ | 8.39 +         |
| chr2 | 2928398 | 2928450 | CSAR_peak_ | 12.13,9.58 +   |
| chr2 | 2928524 | 2928572 | CSAR_peak_ | 12.13 +        |
| chr2 | 2928594 | 2928676 | CSAR_peak_ | 26.05 +        |
| chr2 | 2929259 | 2929355 | CSAR_peak_ | 9.58,6.57 +    |
| chr2 | 2929543 | 2929618 | CSAR_peak_ | 8.65,9.58 +    |
| chr2 | 2929709 | 2929721 | CSAR_peak_ | 6.21 +         |
| chr2 | 2929847 | 2929882 | CSAR_peak_ | 11.06 +        |
| chr2 | 2938531 | 2938583 | CSAR_peak_ | 8.7,10.96,10.+ |
| chr2 | 3349455 | 3349503 | CSAR_peak_ | 7.34 +         |
| chr2 | 3362941 | 3363013 | CSAR_peak_ | 9.03 +         |
| chr2 | 3364068 | 3364121 | CSAR_peak_ | 7.18 +         |
| chr2 | 3388327 | 3388446 | CSAR_peak_ | 11.74,9.79,7.+ |
| chr2 | 3388918 | 3388986 | CSAR_peak_ | 10.02 +        |
| chr2 | 3411084 | 3411124 | CSAR_peak_ | 8.95 +         |
| chr2 | 3418142 | 3418212 | CSAR_peak_ | 8.19 +         |
| chr2 | 3419051 | 3419111 | CSAR_peak_ | 7.58 +         |
| chr2 | 3419254 | 3419300 | CSAR_peak_ | 12.12 +        |
| chr2 | 3426102 | 3426163 | CSAR_peak_ | 8.65 +         |
| chr2 | 3448300 | 3448349 | CSAR_peak_ | 14.25,13.84 +  |
| chr2 | 3449727 | 3449781 | CSAR_peak_ | 8.95,6.03 +    |
| chr2 | 3450798 | 3450860 | CSAR_peak_ | 18.89,7.18 +   |
| chr2 | 3451867 | 3451924 | CSAR_peak_ | 7.27 +         |
| chr2 | 3452058 | 3452100 | CSAR_peak_ | 14.76,14.76 +  |
| chr2 | 4478615 | 4478711 | CSAR_peak_ | 7.36,10.96 +   |
| chr2 | 4478801 | 4478874 | CSAR_peak_ | 11.38,21.56 +  |
| chr2 | 4479364 | 4479409 | CSAR_peak_ | 9.97 +         |
| chr2 | 4479617 | 4479738 | CSAR_peak_ | 6.1 +          |
| chr2 | 4479897 | 4479913 | CSAR_peak_ | 14.88 +        |
| chr2 | 4479991 | 4480047 | CSAR_peak_ | 11.66,6.57 +   |
| chr2 | 4480160 | 4480209 | CSAR_peak_ | 11.38,9.58 +   |
| chr2 | 4480228 | 4480298 | CSAR_peak_ | 6.44,12.17,6.+ |
| chr2 | 4480316 | 4480422 | CSAR_peak_ | 8.28,6.22 +    |
| chr2 | 4480467 | 4480588 | CSAR_peak_ | 11.32,6.28,7.+ |
| chr2 | 4481041 | 4481197 | CSAR_peak_ | 20.18,6.95,2:+ |
| chr2 | 4481450 | 4481504 | CSAR_peak_ | 10.7 +         |
| chr2 | 4481524 | 4481581 | CSAR_peak_ | 6.44,7.73 +    |
| chr2 | 4481770 | 4481843 | CSAR_peak_ | 31.08,20.03 +  |

|      |         |         |            |               |   |
|------|---------|---------|------------|---------------|---|
| chr2 | 4481869 | 4481906 | CSAR_peak_ | 6.52          | + |
| chr2 | 4482022 | 4482046 | CSAR_peak_ | 8.39,6.87     | + |
| chr2 | 4482077 | 4482127 | CSAR_peak_ | 13.09,14.92,  | + |
| chr2 | 4482230 | 4482272 | CSAR_peak_ | 7.27          | + |
| chr2 | 4482850 | 4482978 | CSAR_peak_ | 14,9.72       | + |
| chr2 | 4483030 | 4483095 | CSAR_peak_ | 8.39          | + |
| chr2 | 4483118 | 4483169 | CSAR_peak_ | 14.88         | + |
| chr2 | 4483447 | 4483487 | CSAR_peak_ | 8.53          | + |
| chr2 | 4483494 | 4483599 | CSAR_peak_ | 7.6,13.37,12. | + |
| chr2 | 4483670 | 4483785 | CSAR_peak_ | 17.37,15.68   | + |
| chr2 | 4483830 | 4483874 | CSAR_peak_ | 6.45,7.58     | + |
| chr2 | 4483959 | 4483998 | CSAR_peak_ | 8.95          | + |
| chr2 | 4484077 | 4484145 | CSAR_peak_ | 9.61          | + |
| chr2 | 4484508 | 4484614 | CSAR_peak_ | 10.83         | + |
| chr2 | 4486103 | 4486161 | CSAR_peak_ | 13.51,8.65    | + |
| chr2 | 4486535 | 4486600 | CSAR_peak_ | 7.92          | + |
| chr2 | 5074838 | 5074881 | CSAR_peak_ | 6.21          | + |
| chr2 | 5075845 | 5075927 | CSAR_peak_ | 8.39          | + |
| chr2 | 5076064 | 5076316 | CSAR_peak_ | 13.48,7.58,7. | + |
| chr2 | 5076582 | 5076651 | CSAR_peak_ | 6.21          | + |
| chr2 | 5076990 | 5077083 | CSAR_peak_ | 16.33,6.45    | + |
| chr2 | 5077856 | 5077920 | CSAR_peak_ | 8.39          | + |
| chr2 | 5078326 | 5078378 | CSAR_peak_ | 9.58          | + |
| chr2 | 5651291 | 5651345 | CSAR_peak_ | 10.83,6.21    | + |
| chr2 | 5652020 | 5652047 | CSAR_peak_ | 6.57          | + |
| chr2 | 5652370 | 5652440 | CSAR_peak_ | 6.95,6.02,13. | + |
| chr2 | 5653069 | 5653114 | CSAR_peak_ | 5.62          | + |
| chr2 | 5653262 | 5653277 | CSAR_peak_ | 7.92          | + |
| chr2 | 5653774 | 5653846 | CSAR_peak_ | 12.35         | + |
| chr2 | 5653917 | 5653957 | CSAR_peak_ | 6.78          | + |
| chr2 | 5654056 | 5654126 | CSAR_peak_ | 7.34,6.21     | + |
| chr2 | 5654694 | 5654769 | CSAR_peak_ | 12.74         | + |
| chr2 | 5743977 | 5744046 | CSAR_peak_ | 7.58,5.62     | + |
| chr2 | 5744776 | 5744871 | CSAR_peak_ | 8.28,6.44     | + |
| chr2 | 5745216 | 5745263 | CSAR_peak_ | 7.27          | + |
| chr2 | 5745838 | 5745954 | CSAR_peak_ | 8.39,5.62,8.3 | + |
| chr2 | 5753934 | 5753953 | CSAR_peak_ | 6.21          | + |
| chr2 | 5907109 | 5907151 | CSAR_peak_ | 20.13,10.95   | + |
| chr2 | 5907253 | 5907289 | CSAR_peak_ | 8.65,13.51    | + |
| chr2 | 5907867 | 5907920 | CSAR_peak_ | 10.83         | + |
| chr2 | 5908088 | 5908139 | CSAR_peak_ | 8.39          | + |
| chr2 | 5925734 | 5925815 | CSAR_peak_ | 14.85,16.33   | + |

|      |         |         |            |               |   |
|------|---------|---------|------------|---------------|---|
| chr2 | 5926302 | 5926391 | CSAR_peak_ | 8.65,6.44     | + |
| chr2 | 5926911 | 5927001 | CSAR_peak_ | 7.27          | + |
| chr2 | 5927216 | 5927258 | CSAR_peak_ | 6.95          | + |
| chr2 | 5928946 | 5928995 | CSAR_peak_ | 6.21          | + |
| chr2 | 5929562 | 5929723 | CSAR_peak_ | 11.14,18.85   | + |
| chr2 | 5929781 | 5929922 | CSAR_peak_ | 19.36,17.35   | + |
| chr2 | 5930294 | 5930344 | CSAR_peak_ | 7.27          | + |
| chr2 | 6037878 | 6037913 | CSAR_peak_ | 12.13         | + |
| chr2 | 6038203 | 6038219 | CSAR_peak_ | 7.58          | + |
| chr2 | 6039085 | 6039153 | CSAR_peak_ | 6.57          | + |
| chr2 | 6040763 | 6040801 | CSAR_peak_ | 6.57          | + |
| chr2 | 6278269 | 6278317 | CSAR_peak_ | 16.33         | + |
| chr2 | 6278831 | 6278925 | CSAR_peak_ | 14.88,8.13    | + |
| chr2 | 6279415 | 6279465 | CSAR_peak_ | 7.27,9.77     | + |
| chr2 | 6279596 | 6279646 | CSAR_peak_ | 6.52,9.03     | + |
| chr2 | 6279902 | 6279956 | CSAR_peak_ | 10.83,7.36    | + |
| chr2 | 6280161 | 6280178 | CSAR_peak_ | 6.21          | + |
| chr2 | 6281270 | 6281327 | CSAR_peak_ | 5.62,8.65     | + |
| chr2 | 6281600 | 6281663 | CSAR_peak_ | 7.27          | + |
| chr2 | 6282077 | 6282110 | CSAR_peak_ | 6.02          | + |
| chr2 | 6283321 | 6283389 | CSAR_peak_ | 8.95          | + |
| chr2 | 6314177 | 6314229 | CSAR_peak_ | 6.85          | + |
| chr2 | 6314325 | 6314342 | CSAR_peak_ | 7.92          | + |
| chr2 | 6314390 | 6314481 | CSAR_peak_ | 16.33,6.52    | + |
| chr2 | 6314722 | 6314794 | CSAR_peak_ | 6.44,10.46,9. | + |
| chr2 | 6314889 | 6314990 | CSAR_peak_ | 12.13,9.79,7. | + |
| chr2 | 6315115 | 6315274 | CSAR_peak_ | 8.39,8.65,6.9 | + |
| chr2 | 6315416 | 6315448 | CSAR_peak_ | 6.03          | + |
| chr2 | 6400819 | 6400887 | CSAR_peak_ | 8.39,7.27     | + |
| chr2 | 6415273 | 6415311 | CSAR_peak_ | 6.95          | + |
| chr2 | 6533941 | 6533977 | CSAR_peak_ | 7.27          | + |
| chr2 | 6536013 | 6536067 | CSAR_peak_ | 8.39          | + |
| chr2 | 6536648 | 6536720 | CSAR_peak_ | 16.34         | + |
| chr2 | 6776461 | 6776514 | CSAR_peak_ | 14.76         | + |
| chr2 | 6776603 | 6776646 | CSAR_peak_ | 7.26,6.57     | + |
| chr2 | 6777715 | 6777781 | CSAR_peak_ | 12.2,27.87,6  | + |
| chr2 | 6811793 | 6811849 | CSAR_peak_ | 11.14,9.77,1  | + |
| chr2 | 6930808 | 6930902 | CSAR_peak_ | 8.39,7.58     | + |
| chr2 | 6931634 | 6931654 | CSAR_peak_ | 6.21          | + |
| chr2 | 6947327 | 6947364 | CSAR_peak_ | 6.12          | + |
| chr2 | 6947372 | 6947567 | CSAR_peak_ | 6.51,8.39,18. | + |
| chr2 | 6947766 | 6947814 | CSAR_peak_ | 14.88         | + |

|      |         |         |            |               |   |
|------|---------|---------|------------|---------------|---|
| chr2 | 6947853 | 6947954 | CSAR_peak_ | 6.57,9.27     | + |
| chr2 | 6950226 | 6950468 | CSAR_peak_ | 19.01,10.52,  | + |
| chr2 | 6950489 | 6950680 | CSAR_peak_ | 24.21,25.08,  | + |
| chr2 | 6950698 | 6951005 | CSAR_peak_ | 10.33,25.18,  | + |
| chr2 | 6951050 | 6951092 | CSAR_peak_ | 6.21          | + |
| chr2 | 6952614 | 6952669 | CSAR_peak_ | 9.77          | + |
| chr2 | 7074432 | 7074447 | CSAR_peak_ | 7.27          | + |
| chr2 | 7074570 | 7074628 | CSAR_peak_ | 7.27          | + |
| chr2 | 7074739 | 7074819 | CSAR_peak_ | 10.83,10.83   | + |
| chr2 | 7074836 | 7075077 | CSAR_peak_ | 8.65,18.2,13. | + |
| chr2 | 7075088 | 7075133 | CSAR_peak_ | 12.13         | + |
| chr2 | 7075181 | 7075300 | CSAR_peak_ | 10.02,17.37   | + |
| chr2 | 7075320 | 7075459 | CSAR_peak_ | 10.83,11.38   | + |
| chr2 | 7075493 | 7075674 | CSAR_peak_ | 21.59,12.32,  | + |
| chr2 | 7075678 | 7075975 | CSAR_peak_ | 12.27,18.35,  | + |
| chr2 | 7076046 | 7076305 | CSAR_peak_ | 13.6,19.93,9. | + |
| chr2 | 7076427 | 7076480 | CSAR_peak_ | 11.14         | + |
| chr2 | 7191055 | 7191198 | CSAR_peak_ | 727.3,172.44  | + |
| chr2 | 7191246 | 7191546 | CSAR_peak_ | 450.69,312.5  | + |
| chr2 | 7201297 | 7201347 | CSAR_peak_ | 7.27          | + |
| chr2 | 7244718 | 7244738 | CSAR_peak_ | 7.34          | + |
| chr2 | 7244776 | 7244862 | CSAR_peak_ | 5.67,23.03,9. | + |
| chr2 | 7244975 | 7245075 | CSAR_peak_ | 10.83         | + |
| chr2 | 7245260 | 7245401 | CSAR_peak_ | 9.27,8.28,13. | + |
| chr2 | 7245762 | 7245808 | CSAR_peak_ | 6.21          | + |
| chr2 | 7249775 | 7249830 | CSAR_peak_ | 9.58,6.21     | + |
| chr2 | 7317776 | 7317885 | CSAR_peak_ | 6.64,11.28,7. | + |
| chr2 | 7318739 | 7318750 | CSAR_peak_ | 8.65          | + |
| chr2 | 7318842 | 7318881 | CSAR_peak_ | 7.26,8.39     | + |
| chr2 | 7318885 | 7318895 | CSAR_peak_ | 6.21          | + |
| chr2 | 7355367 | 7355409 | CSAR_peak_ | 7.27          | + |
| chr2 | 7355619 | 7355659 | CSAR_peak_ | 7.27          | + |
| chr2 | 7357005 | 7357027 | CSAR_peak_ | 6.03,8.39     | + |
| chr2 | 7357818 | 7357853 | CSAR_peak_ | 9.58          | + |
| chr2 | 7357967 | 7358038 | CSAR_peak_ | 14.76,5.62    | + |
| chr2 | 7359555 | 7359612 | CSAR_peak_ | 6.1,7.29      | + |
| chr2 | 7359969 | 7360001 | CSAR_peak_ | 6.21          | + |
| chr2 | 7360381 | 7360435 | CSAR_peak_ | 8.39          | + |
| chr2 | 7360686 | 7360749 | CSAR_peak_ | 12.17         | + |
| chr2 | 7376727 | 7376749 | CSAR_peak_ | 6.21          | + |
| chr2 | 7383151 | 7383180 | CSAR_peak_ | 6.57          | + |
| chr2 | 7386387 | 7386446 | CSAR_peak_ | 6.95          | + |



|      |         |         |            |                |   |
|------|---------|---------|------------|----------------|---|
| chr2 | 7386589 | 7386660 | CSAR_peak_ | 6.21           | + |
| chr2 | 7386889 | 7386932 | CSAR_peak_ | 9.58,6.21      | + |
| chr2 | 7387221 | 7387263 | CSAR_peak_ | 6.87           | + |
| chr2 | 7402463 | 7402623 | CSAR_peak_ | 24.21,10.83    | + |
| chr2 | 7403003 | 7403101 | CSAR_peak_ | 7.27           | + |
| chr2 | 7498994 | 7499035 | CSAR_peak_ | 6.21           | + |
| chr2 | 7518217 | 7518274 | CSAR_peak_ | 9.58           | + |
| chr2 | 7518675 | 7518736 | CSAR_peak_ | 10.12,6.32     | + |
| chr2 | 7518822 | 7518862 | CSAR_peak_ | 8.39           | + |
| chr2 | 7519002 | 7519047 | CSAR_peak_ | 9.58,6.03      | + |
| chr2 | 7519129 | 7519146 | CSAR_peak_ | 6.03           | + |
| chr2 | 7520682 | 7520725 | CSAR_peak_ | 23.41,27.55    | + |
| chr2 | 7520751 | 7520838 | CSAR_peak_ | 53.52,14.21    | + |
| chr2 | 7520841 | 7520898 | CSAR_peak_ | 22.74,20.44    | + |
| chr2 | 7520941 | 7521025 | CSAR_peak_ | 7.11,16.91,2(+ |   |
| chr2 | 7554375 | 7554416 | CSAR_peak_ | 10.83          | + |
| chr2 | 7556350 | 7556427 | CSAR_peak_ | 11.63,6.03,8.+ |   |
| chr2 | 7557051 | 7557129 | CSAR_peak_ | 8.65,11.14     | + |
| chr2 | 7557406 | 7557435 | CSAR_peak_ | 8.95           | + |
| chr2 | 7559845 | 7559895 | CSAR_peak_ | 6.21           | + |
| chr2 | 7560978 | 7561027 | CSAR_peak_ | 8.39           | + |
| chr2 | 7562232 | 7562281 | CSAR_peak_ | 7.34           | + |
| chr2 | 7562913 | 7562977 | CSAR_peak_ | 6.57           | + |
| chr2 | 7565192 | 7565247 | CSAR_peak_ | 10.83          | + |
| chr2 | 7607125 | 7607197 | CSAR_peak_ | 7.27           | + |
| chr2 | 7607968 | 7608094 | CSAR_peak_ | 11.14,8.65     | + |
| chr2 | 7618008 | 7618071 | CSAR_peak_ | 7.27           | + |
| chr2 | 7619042 | 7619084 | CSAR_peak_ | 6.21           | + |
| chr2 | 7619690 | 7619725 | CSAR_peak_ | 6.21           | + |
| chr2 | 7619921 | 7619973 | CSAR_peak_ | 7.27           | + |
| chr2 | 7620057 | 7620137 | CSAR_peak_ | 6.45,8.95      | + |
| chr2 | 7628065 | 7628102 | CSAR_peak_ | 6.21           | + |
| chr2 | 7673294 | 7673448 | CSAR_peak_ | 6.48,7.91,8.5+ |   |
| chr2 | 7673455 | 7673551 | CSAR_peak_ | 8.94,16.33,1(+ |   |
| chr2 | 7673585 | 7673646 | CSAR_peak_ | 8.9            | + |
| chr2 | 7692697 | 7692745 | CSAR_peak_ | 8.39           | + |
| chr2 | 7694044 | 7694084 | CSAR_peak_ | 12.13,8.39     | + |
| chr2 | 7694177 | 7694198 | CSAR_peak_ | 14.76          | + |
| chr2 | 7694214 | 7694264 | CSAR_peak_ | 6.54,7.73,6.4+ |   |
| chr2 | 7694370 | 7694425 | CSAR_peak_ | 6.21           | + |
| chr2 | 7715027 | 7715086 | CSAR_peak_ | 8.65,8.39,8.2+ |   |
| chr2 | 7738577 | 7738675 | CSAR_peak_ | 8.39           | + |

|      |         |         |             |               |   |
|------|---------|---------|-------------|---------------|---|
| chr2 | 7738839 | 7738877 | CSAR_peak_1 | 6.95          | + |
| chr2 | 7828125 | 7828233 | CSAR_peak_1 | 6.95          | + |
| chr2 | 7846093 | 7846145 | CSAR_peak_1 | 12.13,7.27    | + |
| chr2 | 7864920 | 7864999 | CSAR_peak_1 | 27.77,29.14   | + |
| chr2 | 7865035 | 7865084 | CSAR_peak_1 | 16.34,11.28   | + |
| chr2 | 7865161 | 7865248 | CSAR_peak_1 | 19.36,7.36    | + |
| chr2 | 7865546 | 7865639 | CSAR_peak_1 | 6.21,10.83    | + |
| chr2 | 7866017 | 7866114 | CSAR_peak_1 | 16.33,7.73    | + |
| chr2 | 7867150 | 7867219 | CSAR_peak_1 | 10.95,10.83   | + |
| chr2 | 7868552 | 7868618 | CSAR_peak_1 | 12.13         | + |
| chr2 | 7868628 | 7868749 | CSAR_peak_1 | 14.76,17.87   | + |
| chr2 | 7868833 | 7868900 | CSAR_peak_1 | 7.27,10.02,7. | + |
| chr2 | 7868984 | 7869063 | CSAR_peak_1 | 6.21,6.21,10. | + |
| chr2 | 7869082 | 7869097 | CSAR_peak_1 | 6.21          | + |
| chr2 | 7869174 | 7869251 | CSAR_peak_1 | 10.95         | + |
| chr2 | 7869615 | 7869692 | CSAR_peak_1 | 8.61,6.1      | + |
| chr2 | 7869860 | 7869913 | CSAR_peak_1 | 6.03,12.13    | + |
| chr2 | 7869987 | 7870035 | CSAR_peak_1 | 15.43         | + |
| chr2 | 7870570 | 7870643 | CSAR_peak_1 | 6.57          | + |
| chr2 | 7870738 | 7870822 | CSAR_peak_1 | 8.39          | + |
| chr2 | 7870933 | 7871007 | CSAR_peak_1 | 20.43         | + |
| chr2 | 7871080 | 7871116 | CSAR_peak_1 | 7.27          | + |
| chr2 | 7940234 | 7940286 | CSAR_peak_1 | 5.62          | + |
| chr2 | 8109235 | 8109286 | CSAR_peak_1 | 7.27          | + |
| chr2 | 8109445 | 8109483 | CSAR_peak_1 | 7.27          | + |
| chr2 | 8109579 | 8109641 | CSAR_peak_1 | 8.65,7.58     | + |
| chr2 | 8109746 | 8110070 | CSAR_peak_1 | 12.31,13.66,  | + |
| chr2 | 8110153 | 8110371 | CSAR_peak_1 | 16.11,14.85,  | + |
| chr2 | 8110399 | 8110504 | CSAR_peak_1 | 14,9.79,7.58  | + |
| chr2 | 8110651 | 8110696 | CSAR_peak_1 | 13.44         | + |
| chr2 | 8110707 | 8110750 | CSAR_peak_1 | 7.27          | + |
| chr2 | 8110802 | 8110864 | CSAR_peak_1 | 16.05,10.94   | + |
| chr2 | 8110940 | 8111029 | CSAR_peak_1 | 18.95,24.21,  | + |
| chr2 | 8111054 | 8111211 | CSAR_peak_1 | 16.87,7.47    | + |
| chr2 | 8111258 | 8111368 | CSAR_peak_1 | 9.77,7.47,18. | + |
| chr2 | 8111423 | 8111491 | CSAR_peak_1 | 6.94          | + |
| chr2 | 8111522 | 8111629 | CSAR_peak_1 | 12.17,10.94   | + |
| chr2 | 8111715 | 8111814 | CSAR_peak_1 | 7.73,11.14    | + |
| chr2 | 8111830 | 8111850 | CSAR_peak_1 | 11.14         | + |
| chr2 | 8112309 | 8112712 | CSAR_peak_1 | 17.51,9.03,8. | + |
| chr2 | 8112724 | 8112792 | CSAR_peak_1 | 6.21          | + |
| chr2 | 8113303 | 8113391 | CSAR_peak_1 | 7.27,19.36    | + |

|      |         |         |            |                |   |
|------|---------|---------|------------|----------------|---|
| chr2 | 8113507 | 8113593 | CSAR_peak_ | 13.92,11.14    | + |
| chr2 | 8114373 | 8114409 | CSAR_peak_ | 6.21           | + |
| chr2 | 8119269 | 8119323 | CSAR_peak_ | 7.27,6.21      | + |
| chr2 | 8119677 | 8119779 | CSAR_peak_ | 19.43,19.96    | + |
| chr2 | 8119870 | 8119918 | CSAR_peak_ | 6.44,17.37     | + |
| chr2 | 8119924 | 8119966 | CSAR_peak_ | 7.27           | + |
| chr2 | 8119967 | 8120008 | CSAR_peak_ | 6.95           | + |
| chr2 | 8120114 | 8120177 | CSAR_peak_ | 6.21           | + |
| chr2 | 8120229 | 8120342 | CSAR_peak_ | 6.57,7.27      | + |
| chr2 | 8120400 | 8120481 | CSAR_peak_ | 5.62           | + |
| chr2 | 8120845 | 8120898 | CSAR_peak_ | 5.62           | + |
| chr2 | 8121003 | 8121037 | CSAR_peak_ | 6.21           | + |
| chr2 | 8121196 | 8121256 | CSAR_peak_ | 8.13,20.35     | + |
| chr2 | 8121393 | 8121453 | CSAR_peak_ | 6.03           | + |
| chr2 | 8121506 | 8121532 | CSAR_peak_ | 7.27           | + |
| chr2 | 8121546 | 8121648 | CSAR_peak_ | 5.9,7.34       | + |
| chr2 | 8125805 | 8125824 | CSAR_peak_ | 6.57           | + |
| chr2 | 8125834 | 8125943 | CSAR_peak_ | 12.17,6.78     | + |
| chr2 | 8126016 | 8126108 | CSAR_peak_ | 7.27,6.57,8.3  | + |
| chr2 | 8126201 | 8126323 | CSAR_peak_ | 8.65,9.35,24.  | + |
| chr2 | 8126352 | 8126415 | CSAR_peak_ | 31.2           | + |
| chr2 | 8126558 | 8126753 | CSAR_peak_ | 7.58,21.94,9.  | + |
| chr2 | 8126758 | 8126815 | CSAR_peak_ | 7.73           | + |
| chr2 | 8126839 | 8126892 | CSAR_peak_ | 12.15,9.72     | + |
| chr2 | 8126977 | 8127015 | CSAR_peak_ | 9.61           | + |
| chr2 | 8127098 | 8127163 | CSAR_peak_ | 16.33,10.7,8.  | + |
| chr2 | 8127278 | 8127334 | CSAR_peak_ | 9.27           | + |
| chr2 | 8127496 | 8127516 | CSAR_peak_ | 6.21           | + |
| chr2 | 8128054 | 8128132 | CSAR_peak_ | 9.72,7.13      | + |
| chr2 | 8128210 | 8128292 | CSAR_peak_ | 9.58           | + |
| chr2 | 8128320 | 8128358 | CSAR_peak_ | 6.57           | + |
| chr2 | 8132235 | 8132248 | CSAR_peak_ | 6.21           | + |
| chr2 | 8132337 | 8132385 | CSAR_peak_ | 8.39           | + |
| chr2 | 8143017 | 8143063 | CSAR_peak_ | 6.21           | + |
| chr2 | 8144320 | 8144378 | CSAR_peak_ | 8.39,6.21      | + |
| chr2 | 8165121 | 8165169 | CSAR_peak_ | 6.21           | + |
| chr2 | 8223222 | 8223298 | CSAR_peak_ | 13.49,6.31,1(+ | + |
| chr2 | 8224663 | 8224692 | CSAR_peak_ | 7.58           | + |
| chr2 | 8224807 | 8224875 | CSAR_peak_ | 9.77           | + |
| chr2 | 8224966 | 8224989 | CSAR_peak_ | 8.52,7.27      | + |
| chr2 | 8225058 | 8225111 | CSAR_peak_ | 8.39           | + |
| chr2 | 8225200 | 8225229 | CSAR_peak_ | 6.57           | + |

|      |         |         |            |               |   |
|------|---------|---------|------------|---------------|---|
| chr2 | 8225466 | 8225500 | CSAR_peak_ | 6.21          | + |
| chr2 | 8225639 | 8225696 | CSAR_peak_ | 10.83         | + |
| chr2 | 8226630 | 8226663 | CSAR_peak_ | 6.57          | + |
| chr2 | 8283092 | 8283140 | CSAR_peak_ | 10.31,7.92    | + |
| chr2 | 8284280 | 8284356 | CSAR_peak_ | 8.39,22.56    | + |
| chr2 | 8284435 | 8284467 | CSAR_peak_ | 12.13         | + |
| chr2 | 8284771 | 8284814 | CSAR_peak_ | 6.21          | + |
| chr2 | 8284849 | 8284889 | CSAR_peak_ | 7.27          | + |
| chr2 | 8284893 | 8285058 | CSAR_peak_ | 21.56,14.85   | + |
| chr2 | 8285091 | 8285170 | CSAR_peak_ | 5.62,7.27     | + |
| chr2 | 8285257 | 8285462 | CSAR_peak_ | 7.92,6.57,8.3 | + |
| chr2 | 8285526 | 8285635 | CSAR_peak_ | 19.36         | + |
| chr2 | 8285704 | 8285804 | CSAR_peak_ | 9.58,13.51,7. | + |
| chr2 | 8286038 | 8286098 | CSAR_peak_ | 8.65          | + |
| chr2 | 8286125 | 8286178 | CSAR_peak_ | 6.21          | + |
| chr2 | 8428448 | 8428502 | CSAR_peak_ | 7.27          | + |
| chr2 | 8439899 | 8439922 | CSAR_peak_ | 7.27          | + |
| chr2 | 8440640 | 8440776 | CSAR_peak_ | 7.92,9.77     | + |
| chr2 | 8456024 | 8456086 | CSAR_peak_ | 12.17         | + |
| chr2 | 8459010 | 8459049 | CSAR_peak_ | 5.62          | + |
| chr2 | 8461804 | 8461846 | CSAR_peak_ | 6.44          | + |
| chr2 | 8462558 | 8462650 | CSAR_peak_ | 21.56,8.95    | + |
| chr2 | 8480041 | 8480089 | CSAR_peak_ | 7.27          | + |
| chr2 | 8528119 | 8528159 | CSAR_peak_ | 7.34          | + |
| chr2 | 8583192 | 8583232 | CSAR_peak_ | 8.39          | + |
| chr2 | 8585066 | 8585105 | CSAR_peak_ | 6.21          | + |
| chr2 | 8727181 | 8727240 | CSAR_peak_ | 7.73,9.77     | + |
| chr2 | 8767208 | 8767268 | CSAR_peak_ | 8.39          | + |
| chr2 | 8787496 | 8787542 | CSAR_peak_ | 6.21          | + |
| chr2 | 8787835 | 8787885 | CSAR_peak_ | 17.82,6.02    | + |
| chr2 | 8802162 | 8802286 | CSAR_peak_ | 108.04,168.7  | + |
| chr2 | 8804511 | 8804628 | CSAR_peak_ | 44.97,49.66,  | + |
| chr2 | 8804640 | 8804781 | CSAR_peak_ | 83.22,73.57,  | + |
| chr2 | 8863442 | 8863502 | CSAR_peak_ | 13.48         | + |
| chr2 | 8936468 | 8936534 | CSAR_peak_ | 19.36,7.27    | + |
| chr2 | 8988815 | 8988867 | CSAR_peak_ | 8.39,12.13    | + |
| chr2 | 8988899 | 8988947 | CSAR_peak_ | 10.02         | + |
| chr2 | 8999367 | 8999421 | CSAR_peak_ | 8.39          | + |
| chr2 | 9003881 | 9003964 | CSAR_peak_ | 10.83         | + |
| chr2 | 9005211 | 9005296 | CSAR_peak_ | 7.58,11.14    | + |
| chr2 | 9015256 | 9015308 | CSAR_peak_ | 7.27          | + |
| chr2 | 9015550 | 9015657 | CSAR_peak_ | 8.65          | + |

|      |         |         |            |               |   |
|------|---------|---------|------------|---------------|---|
| chr2 | 9015822 | 9015873 | CSAR_peak_ | 7.27          | + |
| chr2 | 9016623 | 9016719 | CSAR_peak_ | 6.85,9.97     | + |
| chr2 | 9016806 | 9016824 | CSAR_peak_ | 6.21          | + |
| chr2 | 9017017 | 9017144 | CSAR_peak_ | 11.14,10.95,  | + |
| chr2 | 9017169 | 9017218 | CSAR_peak_ | 9.97,6.85     | + |
| chr2 | 9017834 | 9017881 | CSAR_peak_ | 6.21          | + |
| chr2 | 9067560 | 9067615 | CSAR_peak_ | 8.95          | + |
| chr2 | 9067717 | 9067769 | CSAR_peak_ | 6.85          | + |
| chr2 | 9081095 | 9081130 | CSAR_peak_ | 6.57          | + |
| chr2 | 9081406 | 9081468 | CSAR_peak_ | 18.95         | + |
| chr2 | 9082393 | 9082432 | CSAR_peak_ | 8.65          | + |
| chr2 | 9083301 | 9083379 | CSAR_peak_ | 6.45,8.39     | + |
| chr2 | 9108775 | 9108824 | CSAR_peak_ | 7.27          | + |
| chr2 | 9142532 | 9142617 | CSAR_peak_ | 6.21          | + |
| chr2 | 9146741 | 9146773 | CSAR_peak_ | 8.13          | + |
| chr2 | 9147398 | 9147452 | CSAR_peak_ | 6.03          | + |
| chr2 | 9147622 | 9147681 | CSAR_peak_ | 7.27          | + |
| chr2 | 9148014 | 9148063 | CSAR_peak_ | 10.83         | + |
| chr2 | 9150092 | 9150155 | CSAR_peak_ | 8.39          | + |
| chr2 | 9150359 | 9150401 | CSAR_peak_ | 6.03          | + |
| chr2 | 9151264 | 9151290 | CSAR_peak_ | 9.58          | + |
| chr2 | 9152400 | 9152437 | CSAR_peak_ | 7.27          | + |
| chr2 | 9155361 | 9155414 | CSAR_peak_ | 6.57          | + |
| chr2 | 9202009 | 9202096 | CSAR_peak_ | 6.21,7.36     | + |
| chr2 | 9216403 | 9216456 | CSAR_peak_ | 7.34          | + |
| chr2 | 9216534 | 9216624 | CSAR_peak_ | 8.39          | + |
| chr2 | 9217600 | 9217638 | CSAR_peak_ | 8.5           | + |
| chr2 | 9217728 | 9217813 | CSAR_peak_ | 5.62,8.13     | + |
| chr2 | 9218832 | 9218898 | CSAR_peak_ | 8.39          | + |
| chr2 | 9239378 | 9239495 | CSAR_peak_ | 8.39          | + |
| chr2 | 9240734 | 9240750 | CSAR_peak_ | 6.21          | + |
| chr2 | 9241162 | 9241179 | CSAR_peak_ | 7.27          | + |
| chr2 | 9243831 | 9243858 | CSAR_peak_ | 6.21          | + |
| chr2 | 9248777 | 9248858 | CSAR_peak_ | 8.39,7.34     | + |
| chr2 | 9248976 | 9248981 | CSAR_peak_ | 6.95          | + |
| chr2 | 9249081 | 9249150 | CSAR_peak_ | 6.85          | + |
| chr2 | 9249473 | 9249526 | CSAR_peak_ | 9.77          | + |
| chr2 | 9249575 | 9249669 | CSAR_peak_ | 25.07         | + |
| chr2 | 9249734 | 9249801 | CSAR_peak_ | 5.62,7.27     | + |
| chr2 | 9249805 | 9249846 | CSAR_peak_ | 9.58          | + |
| chr2 | 9249928 | 9249971 | CSAR_peak_ | 7.06          | + |
| chr2 | 9387515 | 9387737 | CSAR_peak_ | 7.58,8.39,17. | + |

|      |         |         |            |                |   |
|------|---------|---------|------------|----------------|---|
| chr2 | 9387748 | 9387769 | CSAR_peak_ | 8.28           | + |
| chr2 | 9387792 | 9387961 | CSAR_peak_ | 31.72,20.43    | + |
| chr2 | 9410475 | 9410520 | CSAR_peak_ | 6.57           | + |
| chr2 | 9413340 | 9413381 | CSAR_peak_ | 8.39           | + |
| chr2 | 9471567 | 9471639 | CSAR_peak_ | 7.58,7.58      | + |
| chr2 | 9472187 | 9472212 | CSAR_peak_ | 7.27           | + |
| chr2 | 9472472 | 9472515 | CSAR_peak_ | 7.58           | + |
| chr2 | 9473714 | 9473793 | CSAR_peak_ | 12.13,9.58     | + |
| chr2 | 9473968 | 9474035 | CSAR_peak_ | 16.33,26.37    | + |
| chr2 | 9474229 | 9474250 | CSAR_peak_ | 13.44          | + |
| chr2 | 9474583 | 9474622 | CSAR_peak_ | 6.87           | + |
| chr2 | 9475170 | 9475241 | CSAR_peak_ | 9.77           | + |
| chr2 | 9475561 | 9475609 | CSAR_peak_ | 8.39           | + |
| chr2 | 9476000 | 9476080 | CSAR_peak_ | 11.96          | + |
| chr2 | 9476200 | 9476258 | CSAR_peak_ | 8.39,6.57      | + |
| chr2 | 9489365 | 9489437 | CSAR_peak_ | 13.92          | + |
| chr2 | 9489482 | 9489591 | CSAR_peak_ | 7.92,8.65      | + |
| chr2 | 9490347 | 9490379 | CSAR_peak_ | 6.21           | + |
| chr2 | 9490418 | 9490487 | CSAR_peak_ | 8.39           | + |
| chr2 | 9490760 | 9490802 | CSAR_peak_ | 7.58           | + |
| chr2 | 9546257 | 9546305 | CSAR_peak_ | 6.95           | + |
| chr2 | 9560354 | 9560377 | CSAR_peak_ | 21.88,6.76     | + |
| chr2 | 9560414 | 9560449 | CSAR_peak_ | 8.13           | + |
| chr2 | 9560536 | 9560625 | CSAR_peak_ | 21.96,14.1,2(+ |   |
| chr2 | 9580405 | 9580455 | CSAR_peak_ | 10.83          | + |
| chr2 | 9580564 | 9580599 | CSAR_peak_ | 6.02           | + |
| chr2 | 9581781 | 9581830 | CSAR_peak_ | 10.83          | + |
| chr2 | 9581852 | 9581894 | CSAR_peak_ | 9.58           | + |
| chr2 | 9581900 | 9581936 | CSAR_peak_ | 7.03           | + |
| chr2 | 9582101 | 9582151 | CSAR_peak_ | 16.05,10.62    | + |
| chr2 | 9582196 | 9582278 | CSAR_peak_ | 12.31          | + |
| chr2 | 9582375 | 9582388 | CSAR_peak_ | 6.21           | + |
| chr2 | 9582389 | 9582438 | CSAR_peak_ | 10.07,8.44     | + |
| chr2 | 9582833 | 9582955 | CSAR_peak_ | 16.34,17.82,;  | + |
| chr2 | 9583042 | 9583065 | CSAR_peak_ | 6.44           | + |
| chr2 | 9583141 | 9583181 | CSAR_peak_ | 6.95           | + |
| chr2 | 9628081 | 9628104 | CSAR_peak_ | 6.21           | + |
| chr2 | 9628389 | 9628433 | CSAR_peak_ | 8.39           | + |
| chr2 | 9630529 | 9630603 | CSAR_peak_ | 6.03           | + |
| chr2 | 9630722 | 9630771 | CSAR_peak_ | 8.95           | + |
| chr2 | 9630834 | 9630885 | CSAR_peak_ | 7.73           | + |
| chr2 | 9657602 | 9657646 | CSAR_peak_ | 5.62           | + |

|      |         |         |             |                |   |
|------|---------|---------|-------------|----------------|---|
| chr2 | 9658314 | 9658385 | CSAR_peak_1 | 6.45           | + |
| chr2 | 9658664 | 9658719 | CSAR_peak_1 | 6.02,9.77      | + |
| chr2 | 9658793 | 9658853 | CSAR_peak_1 | 8.39           | + |
| chr2 | 9659661 | 9659700 | CSAR_peak_1 | 6.21           | + |
| chr2 | 9660078 | 9660150 | CSAR_peak_1 | 13,6.57,5.9    | + |
| chr2 | 9660279 | 9660347 | CSAR_peak_1 | 17.51,10.94    | + |
| chr2 | 9660433 | 9660465 | CSAR_peak_1 | 13.44,9.97     | + |
| chr2 | 9678586 | 9678705 | CSAR_peak_1 | 9.77           | + |
| chr2 | 9678904 | 9678969 | CSAR_peak_1 | 13.48,17.82    | + |
| chr2 | 9679087 | 9679133 | CSAR_peak_1 | 7.27           | + |
| chr2 | 9684870 | 9684930 | CSAR_peak_1 | 10.95          | + |
| chr2 | 9685133 | 9685293 | CSAR_peak_1 | 11.38          | + |
| chr2 | 9685639 | 9685677 | CSAR_peak_1 | 6.21           | + |
| chr2 | 9686045 | 9686089 | CSAR_peak_1 | 6.57           | + |
| chr2 | 9729148 | 9729189 | CSAR_peak_1 | 8.65           | + |
| chr2 | 9729844 | 9729908 | CSAR_peak_1 | 13.48,19.98    | + |
| chr2 | 9730067 | 9730124 | CSAR_peak_1 | 13.51          | + |
| chr2 | 9730626 | 9730681 | CSAR_peak_1 | 9.58           | + |
| chr2 | 9737706 | 9737814 | CSAR_peak_1 | 12.17,7.94,6.  | + |
| chr2 | 9737876 | 9738019 | CSAR_peak_1 | 14.73,10.31,1. | + |
| chr2 | 9738033 | 9738072 | CSAR_peak_1 | 8.18           | + |
| chr2 | 9755799 | 9755846 | CSAR_peak_1 | 7.27           | + |
| chr2 | 9755966 | 9756014 | CSAR_peak_1 | 9.58           | + |
| chr2 | 9756223 | 9756236 | CSAR_peak_1 | 6.21           | + |
| chr2 | 9778116 | 9778185 | CSAR_peak_1 | 8.52           | + |
| chr2 | 9779493 | 9779528 | CSAR_peak_1 | 12.13          | + |
| chr2 | 9779607 | 9779635 | CSAR_peak_1 | 8.39           | + |
| chr2 | 9779682 | 9779730 | CSAR_peak_1 | 16.05,6.64,8.  | + |
| chr2 | 9779957 | 9779993 | CSAR_peak_1 | 6.21           | + |
| chr2 | 9780041 | 9780063 | CSAR_peak_1 | 6.21           | + |
| chr2 | 9780110 | 9780164 | CSAR_peak_1 | 10.83,8.39     | + |
| chr2 | 9780337 | 9780369 | CSAR_peak_1 | 8.95           | + |
| chr2 | 9780408 | 9780418 | CSAR_peak_1 | 6.57           | + |
| chr2 | 9780843 | 9780870 | CSAR_peak_1 | 6.03           | + |
| chr2 | 9781024 | 9781060 | CSAR_peak_1 | 7.58           | + |
| chr2 | 9781184 | 9781233 | CSAR_peak_1 | 7.52,6.64      | + |
| chr2 | 9782090 | 9782170 | CSAR_peak_1 | 6.94           | + |
| chr2 | 9782244 | 9782343 | CSAR_peak_1 | 7.27,8.39      | + |
| chr2 | 9782668 | 9782743 | CSAR_peak_1 | 22.58,10.66    | + |
| chr2 | 9782846 | 9782868 | CSAR_peak_1 | 9.61           | + |
| chr2 | 9783050 | 9783124 | CSAR_peak_1 | 9.58           | + |
| chr2 | 9786383 | 9786504 | CSAR_peak_1 | 7.27,7.27      | + |

|      |          |          |             |                |   |
|------|----------|----------|-------------|----------------|---|
| chr2 | 9786537  | 9786656  | CSAR_peak_! | 16.1,10.42,1.1 | + |
| chr2 | 9786662  | 9786729  | CSAR_peak_! | 14.22,6.48,1.1 | + |
| chr2 | 9786827  | 9786864  | CSAR_peak_! | 8.39,16.11     | + |
| chr2 | 9786865  | 9786957  | CSAR_peak_! | 7.77,6.21      | + |
| chr2 | 9787060  | 9787108  | CSAR_peak_! | 7.51           | + |
| chr2 | 9787366  | 9787408  | CSAR_peak_! | 5.62           | + |
| chr2 | 9787502  | 9787548  | CSAR_peak_! | 11.45,10.18    | + |
| chr2 | 9787626  | 9787669  | CSAR_peak_! | 17.4           | + |
| chr2 | 9787803  | 9787871  | CSAR_peak_! | 5.94           | + |
| chr2 | 9788047  | 9788096  | CSAR_peak_! | 7.27           | + |
| chr2 | 9788338  | 9788397  | CSAR_peak_! | 16.36          | + |
| chr2 | 9788488  | 9788566  | CSAR_peak_! | 12.94          | + |
| chr2 | 9788759  | 9788827  | CSAR_peak_! | 7.58,8.5       | + |
| chr2 | 9788887  | 9788914  | CSAR_peak_! | 7.27           | + |
| chr2 | 9788957  | 9789034  | CSAR_peak_! | 10.57          | + |
| chr2 | 9789297  | 9789366  | CSAR_peak_! | 16.33,14.88    | + |
| chr2 | 9789452  | 9789502  | CSAR_peak_! | 6.45           | + |
| chr2 | 9789549  | 9789592  | CSAR_peak_! | 10.12,6.32     | + |
| chr2 | 9789827  | 9789836  | CSAR_peak_! | 8.39           | + |
| chr2 | 9789886  | 9789923  | CSAR_peak_! | 6.57           | + |
| chr2 | 9789973  | 9790025  | CSAR_peak_! | 10.83,6.21     | + |
| chr2 | 9791890  | 9791936  | CSAR_peak_! | 6.21           | + |
| chr2 | 9842065  | 9842260  | CSAR_peak_! | 29.19,21.56    | + |
| chr2 | 9842306  | 9842414  | CSAR_peak_! | 13.44,25.91    | + |
| chr2 | 9842469  | 9842537  | CSAR_peak_! | 20.43,12.5     | + |
| chr2 | 9842940  | 9843003  | CSAR_peak_! | 13.48          | + |
| chr2 | 9925830  | 9925878  | CSAR_peak_! | 11.14,6.02     | + |
| chr2 | 9925973  | 9926027  | CSAR_peak_! | 12.74          | + |
| chr2 | 9973937  | 9973971  | CSAR_peak_! | 6.21           | + |
| chr2 | 9974054  | 9974080  | CSAR_peak_! | 6.21           | + |
| chr2 | 9997053  | 9997092  | CSAR_peak_! | 6.94           | + |
| chr2 | 9997191  | 9997207  | CSAR_peak_! | 7.27           | + |
| chr2 | 10024943 | 10025008 | CSAR_peak_! | 8.39,6.21      | + |
| chr2 | 10025503 | 10025524 | CSAR_peak_! | 6.57           | + |
| chr2 | 10025851 | 10025904 | CSAR_peak_! | 9.58           | + |
| chr2 | 10103136 | 10103172 | CSAR_peak_! | 6.21           | + |
| chr2 | 10230918 | 10230955 | CSAR_peak_! | 7.27           | + |
| chr2 | 10245106 | 10245218 | CSAR_peak_! | 29.2,9.58      | + |
| chr2 | 10245253 | 10245308 | CSAR_peak_! | 7.27,6.21      | + |
| chr2 | 10245353 | 10245457 | CSAR_peak_! | 13.48,12.17,(+ |   |
| chr2 | 10245481 | 10245503 | CSAR_peak_! | 6.64           | + |
| chr2 | 10245536 | 10245668 | CSAR_peak_! | 13.48,7.2,19.1 | + |



|      |          |          |            |               |   |
|------|----------|----------|------------|---------------|---|
| chr2 | 10245776 | 10245818 | CSAR_peak_ | 12.13         | + |
| chr2 | 10245837 | 10245982 | CSAR_peak_ | 8.95,9.58,6.2 | + |
| chr2 | 10246062 | 10246142 | CSAR_peak_ | 7.27          | + |
| chr2 | 10246215 | 10246335 | CSAR_peak_ | 13.48,9.58    | + |
| chr2 | 10247256 | 10247305 | CSAR_peak_ | 8.65          | + |
| chr2 | 10311814 | 10311889 | CSAR_peak_ | 7.58          | + |
| chr2 | 10335174 | 10335244 | CSAR_peak_ | 7.27          | + |
| chr2 | 10336043 | 10336118 | CSAR_peak_ | 14.22,11.34   | + |
| chr2 | 10336261 | 10336274 | CSAR_peak_ | 6.21          | + |
| chr2 | 10380807 | 10380833 | CSAR_peak_ | 7.27          | + |
| chr2 | 10380850 | 10380911 | CSAR_peak_ | 7.36,8.44     | + |
| chr2 | 10450199 | 10450232 | CSAR_peak_ | 6.03          | + |
| chr2 | 10450635 | 10450667 | CSAR_peak_ | 8.39          | + |
| chr2 | 10450864 | 10450883 | CSAR_peak_ | 6.21          | + |
| chr2 | 10564458 | 10564506 | CSAR_peak_ | 6.21          | + |
| chr2 | 10567618 | 10567662 | CSAR_peak_ | 6.21          | + |
| chr2 | 10567813 | 10567874 | CSAR_peak_ | 7.26,5.95     | + |
| chr2 | 10668332 | 10668387 | CSAR_peak_ | 12.17         | + |
| chr2 | 10715248 | 10715293 | CSAR_peak_ | 7.34,9.27     | + |
| chr2 | 10719920 | 10719957 | CSAR_peak_ | 6.03          | + |
| chr2 | 10720586 | 10720641 | CSAR_peak_ | 8.39          | + |
| chr2 | 10720752 | 10720781 | CSAR_peak_ | 6.03          | + |
| chr2 | 10721263 | 10721303 | CSAR_peak_ | 6.03          | + |
| chr2 | 10721325 | 10721400 | CSAR_peak_ | 6.57          | + |
| chr2 | 10722466 | 10722510 | CSAR_peak_ | 13.29,13.44   | + |
| chr2 | 10722919 | 10722969 | CSAR_peak_ | 7.58          | + |
| chr2 | 10723022 | 10723058 | CSAR_peak_ | 7.27          | + |
| chr2 | 10753921 | 10753959 | CSAR_peak_ | 8.39          | + |
| chr2 | 10754012 | 10754075 | CSAR_peak_ | 21.56,10.18,  | + |
| chr2 | 10754096 | 10754166 | CSAR_peak_ | 13.51,8.95    | + |
| chr2 | 10754572 | 10754760 | CSAR_peak_ | 6.21,7.27,22. | + |
| chr2 | 10754882 | 10755022 | CSAR_peak_ | 14.88,14.88   | + |
| chr2 | 10823721 | 10823840 | CSAR_peak_ | 9.58          | + |
| chr2 | 10824178 | 10824219 | CSAR_peak_ | 6.21          | + |
| chr2 | 10824396 | 10824438 | CSAR_peak_ | 6.21          | + |
| chr2 | 10891436 | 10891482 | CSAR_peak_ | 6.21          | + |
| chr2 | 10891582 | 10891642 | CSAR_peak_ | 6.21          | + |
| chr2 | 10891951 | 10891994 | CSAR_peak_ | 6.21          | + |
| chr2 | 10892302 | 10892353 | CSAR_peak_ | 6.21          | + |
| chr2 | 10892637 | 10892690 | CSAR_peak_ | 8.65          | + |
| chr2 | 10954607 | 10954655 | CSAR_peak_ | 7.92          | + |
| chr2 | 11023462 | 11023491 | CSAR_peak_ | 6.21          | + |

|      |          |          |            |               |   |
|------|----------|----------|------------|---------------|---|
| chr2 | 11042534 | 11042699 | CSAR_peak_ | 9.58,13.51    | + |
| chr2 | 11060572 | 11060626 | CSAR_peak_ | 10.83         | + |
| chr2 | 11060645 | 11060669 | CSAR_peak_ | 6.21          | + |
| chr2 | 11158585 | 11158635 | CSAR_peak_ | 6.03          | + |
| chr2 | 11165646 | 11165710 | CSAR_peak_ | 7.27          | + |
| chr2 | 11166218 | 11166260 | CSAR_peak_ | 6.21          | + |
| chr2 | 11198106 | 11198138 | CSAR_peak_ | 8.39          | + |
| chr2 | 11199040 | 11199075 | CSAR_peak_ | 6.03          | + |
| chr2 | 11200493 | 11200568 | CSAR_peak_ | 9.77          | + |
| chr2 | 11200657 | 11200673 | CSAR_peak_ | 5.62          | + |
| chr2 | 11270390 | 11270473 | CSAR_peak_ | 12.13         | + |
| chr2 | 11275345 | 11275393 | CSAR_peak_ | 8.39          | + |
| chr2 | 11300387 | 11300428 | CSAR_peak_ | 8.39          | + |
| chr2 | 11300454 | 11300495 | CSAR_peak_ | 7.58          | + |
| chr2 | 11300614 | 11300698 | CSAR_peak_ | 6.21          | + |
| chr2 | 11338926 | 11338984 | CSAR_peak_ | 9.58,11.14    | + |
| chr2 | 11339630 | 11339654 | CSAR_peak_ | 6.21          | + |
| chr2 | 11411432 | 11411475 | CSAR_peak_ | 6.57          | + |
| chr2 | 11414763 | 11414843 | CSAR_peak_ | 8.39          | + |
| chr2 | 11418090 | 11418161 | CSAR_peak_ | 8.39          | + |
| chr2 | 11482619 | 11482662 | CSAR_peak_ | 6.03          | + |
| chr2 | 11485256 | 11485299 | CSAR_peak_ | 6.03          | + |
| chr2 | 11532881 | 11532957 | CSAR_peak_ | 14.88         | + |
| chr2 | 11546434 | 11546493 | CSAR_peak_ | 6.44,6.22     | + |
| chr2 | 11547446 | 11547496 | CSAR_peak_ | 8.39          | + |
| chr2 | 11547674 | 11547738 | CSAR_peak_ | 7.27          | + |
| chr2 | 11566559 | 11566623 | CSAR_peak_ | 19.36         | + |
| chr2 | 11566884 | 11566954 | CSAR_peak_ | 8.28,19.36    | + |
| chr2 | 11567014 | 11567178 | CSAR_peak_ | 15.56,11.64   | + |
| chr2 | 11567199 | 11567214 | CSAR_peak_ | 6.21          | + |
| chr2 | 11567284 | 11567371 | CSAR_peak_ | 26.05,6.03    | + |
| chr2 | 11569990 | 11570077 | CSAR_peak_ | 12.17,8.95    | + |
| chr2 | 11572943 | 11572995 | CSAR_peak_ | 6.21          | + |
| chr2 | 11573276 | 11573315 | CSAR_peak_ | 6.57          | + |
| chr2 | 11573562 | 11573605 | CSAR_peak_ | 12.17         | + |
| chr2 | 11575056 | 11575147 | CSAR_peak_ | 12.13         | + |
| chr2 | 11575721 | 11575771 | CSAR_peak_ | 7.29          | + |
| chr2 | 11606198 | 11606250 | CSAR_peak_ | 7.58          | + |
| chr2 | 11670301 | 11670367 | CSAR_peak_ | 6.85          | + |
| chr2 | 11670377 | 11670420 | CSAR_peak_ | 6.45          | + |
| chr2 | 11670569 | 11670800 | CSAR_peak_ | 13.35,11.45,! | + |
| chr2 | 11670872 | 11670936 | CSAR_peak_ | 8.61,8.39     | + |

|      |          |          |            |                |   |
|------|----------|----------|------------|----------------|---|
| chr2 | 11670939 | 11670984 | CSAR_peak_ | 6.57,10.02     | + |
| chr2 | 11671054 | 11671141 | CSAR_peak_ | 6.44,8.39      | + |
| chr2 | 11671227 | 11671272 | CSAR_peak_ | 7.27           | + |
| chr2 | 11671286 | 11671328 | CSAR_peak_ | 6.44           | + |
| chr2 | 11671549 | 11671731 | CSAR_peak_ | 6.21,14.76,8.  | + |
| chr2 | 11671884 | 11671946 | CSAR_peak_ | 6.57           | + |
| chr2 | 11672321 | 11672440 | CSAR_peak_ | 10.62,16.22,4. | + |
| chr2 | 11782800 | 11782814 | CSAR_peak_ | 6.57           | + |
| chr2 | 11810522 | 11810600 | CSAR_peak_ | 14.88          | + |
| chr2 | 11860710 | 11860806 | CSAR_peak_ | 9.77,6.21      | + |
| chr2 | 11863522 | 11863563 | CSAR_peak_ | 8.39           | + |
| chr2 | 11878279 | 11878313 | CSAR_peak_ | 8.09           | + |
| chr2 | 11878617 | 11878658 | CSAR_peak_ | 10.83          | + |
| chr2 | 11879614 | 11879631 | CSAR_peak_ | 7.58           | + |
| chr2 | 11880342 | 11880385 | CSAR_peak_ | 7.27           | + |
| chr2 | 11883803 | 11883859 | CSAR_peak_ | 6.21,16.05,7.  | + |
| chr2 | 11884026 | 11884094 | CSAR_peak_ | 6.44           | + |
| chr2 | 11884150 | 11884210 | CSAR_peak_ | 6.02           | + |
| chr2 | 11884978 | 11885024 | CSAR_peak_ | 10.95          | + |
| chr2 | 12056834 | 12056879 | CSAR_peak_ | 10.83          | + |
| chr2 | 12057838 | 12057885 | CSAR_peak_ | 8.39           | + |
| chr2 | 12058671 | 12058721 | CSAR_peak_ | 6.21           | + |
| chr2 | 12058808 | 12058854 | CSAR_peak_ | 7.27           | + |
| chr2 | 12060302 | 12060367 | CSAR_peak_ | 8.39           | + |
| chr2 | 12060834 | 12060898 | CSAR_peak_ | 8.65,12.31     | + |
| chr2 | 12061396 | 12061458 | CSAR_peak_ | 7.92           | + |
| chr2 | 12062057 | 12062068 | CSAR_peak_ | 8.39           | + |
| chr2 | 12062515 | 12062572 | CSAR_peak_ | 6.44,8.39      | + |
| chr2 | 12062994 | 12063084 | CSAR_peak_ | 9.58           | + |
| chr2 | 12063281 | 12063322 | CSAR_peak_ | 7.58           | + |
| chr2 | 12063644 | 12063682 | CSAR_peak_ | 6.44           | + |
| chr2 | 12064990 | 12065039 | CSAR_peak_ | 6.21           | + |
| chr2 | 12065047 | 12065089 | CSAR_peak_ | 7.27           | + |
| chr2 | 12069124 | 12069161 | CSAR_peak_ | 6.21           | + |
| chr2 | 12069374 | 12069421 | CSAR_peak_ | 6.21           | + |
| chr2 | 12081202 | 12081284 | CSAR_peak_ | 16.11,8.5      | + |
| chr2 | 12083260 | 12083385 | CSAR_peak_ | 6.21,15        | + |
| chr2 | 12083488 | 12083536 | CSAR_peak_ | 8.95           | + |
| chr2 | 12083538 | 12083559 | CSAR_peak_ | 6.85           | + |
| chr2 | 12084206 | 12084246 | CSAR_peak_ | 16.33          | + |
| chr2 | 12086918 | 12086953 | CSAR_peak_ | 7.27           | + |
| chr2 | 12087207 | 12087257 | CSAR_peak_ | 8.39           | + |

|      |          |          |            |              |   |
|------|----------|----------|------------|--------------|---|
| chr2 | 12087404 | 12087452 | CSAR_peak_ | 7.27,8.39    | + |
| chr2 | 12087685 | 12087696 | CSAR_peak_ | 6.85         | + |
| chr2 | 12087825 | 12087851 | CSAR_peak_ | 8.39         | + |
| chr2 | 12096803 | 12096871 | CSAR_peak_ | 6.03         | + |
| chr2 | 12097581 | 12097626 | CSAR_peak_ | 6.21         | + |
| chr2 | 12211717 | 12211782 | CSAR_peak_ | 7.27         | + |
| chr2 | 12378664 | 12378751 | CSAR_peak_ | 8.52,14.76   | + |
| chr2 | 12378810 | 12378845 | CSAR_peak_ | 14.88,8.65   | + |
| chr2 | 12378932 | 12379019 | CSAR_peak_ | 15.68,7.92   | + |
| chr2 | 12379034 | 12379091 | CSAR_peak_ | 8.65         | + |
| chr2 | 12379286 | 12379354 | CSAR_peak_ | 8.3          | + |
| chr2 | 12379550 | 12379584 | CSAR_peak_ | 9.61         | + |
| chr2 | 12379615 | 12379634 | CSAR_peak_ | 7.26         | + |
| chr2 | 12379691 | 12379770 | CSAR_peak_ | 6.1,6.45     | + |
| chr2 | 12379987 | 12380065 | CSAR_peak_ | 5.62,7.27    | + |
| chr2 | 12380068 | 12380121 | CSAR_peak_ | 10.83,6.21   | + |
| chr2 | 12380154 | 12380235 | CSAR_peak_ | 7.27         | + |
| chr2 | 12380322 | 12380426 | CSAR_peak_ | 9.58,19.36   | + |
| chr2 | 12380492 | 12380549 | CSAR_peak_ | 6.57         | + |
| chr2 | 12482669 | 12482723 | CSAR_peak_ | 9.58         | + |
| chr2 | 12483809 | 12483913 | CSAR_peak_ | 6.03         | + |
| chr2 | 12531460 | 12531524 | CSAR_peak_ | 16.05        | + |
| chr2 | 12534540 | 12534595 | CSAR_peak_ | 10.95        | + |
| chr2 | 12558342 | 12558386 | CSAR_peak_ | 6.21         | + |
| chr2 | 12558548 | 12558605 | CSAR_peak_ | 10.95,6.44   | + |
| chr2 | 12558616 | 12558660 | CSAR_peak_ | 6.03         | + |
| chr2 | 12559099 | 12559149 | CSAR_peak_ | 5.62         | + |
| chr2 | 12559283 | 12559405 | CSAR_peak_ | 10.12,20.5   | + |
| chr2 | 12560084 | 12560155 | CSAR_peak_ | 17.51,6.57   | + |
| chr2 | 12561460 | 12561520 | CSAR_peak_ | 9.79,8.95    | + |
| chr2 | 12561652 | 12561701 | CSAR_peak_ | 7.27         | + |
| chr2 | 12561911 | 12562007 | CSAR_peak_ | 24.52,5.62   | + |
| chr2 | 12586483 | 12586515 | CSAR_peak_ | 6.21         | + |
| chr2 | 12587166 | 12587217 | CSAR_peak_ | 7.34,6.91    | + |
| chr2 | 12587297 | 12587316 | CSAR_peak_ | 11.14        | + |
| chr2 | 12587789 | 12587925 | CSAR_peak_ | 19.36,27.64, | + |
| chr2 | 12587941 | 12588003 | CSAR_peak_ | 6.57,7.58    | + |
| chr2 | 12588204 | 12588254 | CSAR_peak_ | 6.95         | + |
| chr2 | 12588825 | 12588885 | CSAR_peak_ | 8.39,8.39    | + |
| chr2 | 12589181 | 12589231 | CSAR_peak_ | 13.48        | + |
| chr2 | 12591119 | 12591154 | CSAR_peak_ | 7.27         | + |
| chr2 | 12619089 | 12619125 | CSAR_peak_ | 8.39         | + |

|      |          |          |            |                 |   |
|------|----------|----------|------------|-----------------|---|
| chr2 | 12667405 | 12667458 | CSAR_peak_ | 7.27            | + |
| chr2 | 12667558 | 12667606 | CSAR_peak_ | 6.21            | + |
| chr2 | 12667860 | 12667900 | CSAR_peak_ | 6.21            | + |
| chr2 | 12667954 | 12668024 | CSAR_peak_ | 8.95,8.95       | + |
| chr2 | 12668194 | 12668264 | CSAR_peak_ | 9.58,6.95       | + |
| chr2 | 12668769 | 12668808 | CSAR_peak_ | 6.57            | + |
| chr2 | 12669377 | 12669490 | CSAR_peak_ | 6.21,9.77,7.2   | + |
| chr2 | 12669807 | 12669846 | CSAR_peak_ | 7.27            | + |
| chr2 | 12669935 | 12669996 | CSAR_peak_ | 17.51           | + |
| chr2 | 12698026 | 12698109 | CSAR_peak_ | 7.27            | + |
| chr2 | 12698461 | 12698504 | CSAR_peak_ | 5.62            | + |
| chr2 | 12777458 | 12777488 | CSAR_peak_ | 6.21            | + |
| chr2 | 12777898 | 12778101 | CSAR_peak_ | 6.21,8.39,14.   | + |
| chr2 | 12778359 | 12778418 | CSAR_peak_ | 8.39            | + |
| chr2 | 12778494 | 12778616 | CSAR_peak_ | 8.39,10.83      | + |
| chr2 | 12778907 | 12778956 | CSAR_peak_ | 6.21            | + |
| chr2 | 12779023 | 12779073 | CSAR_peak_ | 7.27            | + |
| chr2 | 12779350 | 12779429 | CSAR_peak_ | 8.39,20.13      | + |
| chr2 | 12814412 | 12814462 | CSAR_peak_ | 10.83           | + |
| chr2 | 12814464 | 12814488 | CSAR_peak_ | 6.21            | + |
| chr2 | 12814722 | 12814752 | CSAR_peak_ | 8.39            | + |
| chr2 | 12814885 | 12815010 | CSAR_peak_ | 19.01,8.84,10.  | + |
| chr2 | 12815128 | 12815253 | CSAR_peak_ | 17.37,10.62,10. | + |
| chr2 | 12815268 | 12815381 | CSAR_peak_ | 6.51,10.3,12.   | + |
| chr2 | 12815422 | 12815476 | CSAR_peak_ | 7.94,16.05      | + |
| chr2 | 12815513 | 12815634 | CSAR_peak_ | 6.57,13.56,8.   | + |
| chr2 | 12815642 | 12815758 | CSAR_peak_ | 5.9,7.36        | + |
| chr2 | 12815762 | 12815895 | CSAR_peak_ | 10.02           | + |
| chr2 | 12815900 | 12815969 | CSAR_peak_ | 7.27,7.27       | + |
| chr2 | 12816047 | 12816089 | CSAR_peak_ | 8.39            | + |
| chr2 | 12816316 | 12816371 | CSAR_peak_ | 9.77,6.21       | + |
| chr2 | 12821825 | 12821872 | CSAR_peak_ | 6.21            | + |
| chr2 | 12822634 | 12822784 | CSAR_peak_ | 7.73,17.35      | + |
| chr2 | 12881665 | 12881753 | CSAR_peak_ | 83.35,19.46,10. | + |
| chr2 | 12882818 | 12882896 | CSAR_peak_ | 6.82,49.38,20.  | + |
| chr2 | 12897142 | 12897208 | CSAR_peak_ | 7.27            | + |
| chr2 | 12897534 | 12897585 | CSAR_peak_ | 8.39            | + |
| chr2 | 12898120 | 12898170 | CSAR_peak_ | 9.58            | + |
| chr2 | 12973807 | 12973856 | CSAR_peak_ | 10.31,8.28      | + |
| chr2 | 12974032 | 12974074 | CSAR_peak_ | 6.21            | + |
| chr2 | 12974529 | 12974548 | CSAR_peak_ | 7.27            | + |
| chr2 | 12975185 | 12975305 | CSAR_peak_ | 6.87,24.21      | + |

|      |          |          |            |                |   |
|------|----------|----------|------------|----------------|---|
| chr2 | 13037224 | 13037443 | CSAR_peak_ | 16.25,12.78,;  | + |
| chr2 | 13037459 | 13037527 | CSAR_peak_ | 14.12,50.01    | + |
| chr2 | 13037624 | 13038063 | CSAR_peak_ | 15.28,35.7,7.  | + |
| chr2 | 13038177 | 13038249 | CSAR_peak_ | 11.34,8.65,2;  | + |
| chr2 | 13038343 | 13038414 | CSAR_peak_ | 12.93,5.79     | + |
| chr2 | 13038430 | 13038501 | CSAR_peak_ | 11.66          | + |
| chr2 | 13038563 | 13038645 | CSAR_peak_ | 14.08,7.36     | + |
| chr2 | 13038656 | 13038739 | CSAR_peak_ | 13.92,9.58,7.  | + |
| chr2 | 13038783 | 13038876 | CSAR_peak_ | 16.33,13.48    | + |
| chr2 | 13038908 | 13039014 | CSAR_peak_ | 9.32,12.17     | + |
| chr2 | 13039087 | 13039139 | CSAR_peak_ | 11.66          | + |
| chr2 | 13039191 | 13039308 | CSAR_peak_ | 14.76,6.85,1(+ |   |
| chr2 | 13039362 | 13039396 | CSAR_peak_ | 6.44           | + |
| chr2 | 13039459 | 13039818 | CSAR_peak_ | 20.44,20.53    | + |
| chr2 | 13039896 | 13040337 | CSAR_peak_ | 26.77,19.36,;  | + |
| chr2 | 13040355 | 13040429 | CSAR_peak_ | 11.16,13.32,;  | + |
| chr2 | 13040479 | 13040504 | CSAR_peak_ | 6.95           | + |
| chr2 | 13040556 | 13040594 | CSAR_peak_ | 6.21           | + |
| chr2 | 13040620 | 13040855 | CSAR_peak_ | 7.73,13.42,6.  | + |
| chr2 | 13040878 | 13040946 | CSAR_peak_ | 11.32,10.94,;  | + |
| chr2 | 13040949 | 13041116 | CSAR_peak_ | 7.27,7.27,36.  | + |
| chr2 | 13041122 | 13041160 | CSAR_peak_ | 8.33,6.4       | + |
| chr2 | 13041200 | 13041243 | CSAR_peak_ | 14,13.09       | + |
| chr2 | 13041298 | 13041350 | CSAR_peak_ | 10.31          | + |
| chr2 | 13041444 | 13041641 | CSAR_peak_ | 16.05,19.36    | + |
| chr2 | 13041730 | 13042036 | CSAR_peak_ | 8.39,8.09,8.3  | + |
| chr2 | 13042296 | 13042357 | CSAR_peak_ | 8.95,8.65      | + |
| chr2 | 13042386 | 13042461 | CSAR_peak_ | 6.95           | + |
| chr2 | 13095411 | 13095477 | CSAR_peak_ | 12.31          | + |
| chr2 | 13096430 | 13096469 | CSAR_peak_ | 7.34           | + |
| chr2 | 13096938 | 13097014 | CSAR_peak_ | 16.11,6.02     | + |
| chr2 | 13097193 | 13097230 | CSAR_peak_ | 8.39           | + |
| chr2 | 13139090 | 13139160 | CSAR_peak_ | 6.74,9.77      | + |
| chr2 | 13139191 | 13139276 | CSAR_peak_ | 15             | + |
| chr2 | 13139309 | 13139473 | CSAR_peak_ | 7.58,11.75,1(+ |   |
| chr2 | 13139504 | 13139607 | CSAR_peak_ | 25.34,48.09,;  | + |
| chr2 | 13139824 | 13139859 | CSAR_peak_ | 9.79           | + |
| chr2 | 13140104 | 13140133 | CSAR_peak_ | 6.21           | + |
| chr2 | 13140259 | 13140285 | CSAR_peak_ | 12.31,8.39     | + |
| chr2 | 13140320 | 13140334 | CSAR_peak_ | 8.95           | + |
| chr2 | 13140542 | 13140581 | CSAR_peak_ | 7.27           | + |
| chr2 | 13141579 | 13141612 | CSAR_peak_ | 6.44           | + |

|      |          |          |            |                |   |
|------|----------|----------|------------|----------------|---|
| chr2 | 13141720 | 13141769 | CSAR_peak_ | 12.17          | + |
| chr2 | 13141878 | 13141965 | CSAR_peak_ | 5.62,10.57,6.  | + |
| chr2 | 13142161 | 13142186 | CSAR_peak_ | 7.27           | + |
| chr2 | 13162503 | 13162537 | CSAR_peak_ | 6.21           | + |
| chr2 | 13162572 | 13162625 | CSAR_peak_ | 15             | + |
| chr2 | 13162662 | 13162699 | CSAR_peak_ | 10.02          | + |
| chr2 | 13162746 | 13162796 | CSAR_peak_ | 9.58           | + |
| chr2 | 13162921 | 13162950 | CSAR_peak_ | 7.73,7.58      | + |
| chr2 | 13163018 | 13163068 | CSAR_peak_ | 7.58           | + |
| chr2 | 13163175 | 13163231 | CSAR_peak_ | 8.65,6.21      | + |
| chr2 | 13175017 | 13175066 | CSAR_peak_ | 9.58,6.21      | + |
| chr2 | 13175674 | 13175718 | CSAR_peak_ | 6.21           | + |
| chr2 | 13197710 | 13197758 | CSAR_peak_ | 12.13,6.03     | + |
| chr2 | 13198872 | 13198904 | CSAR_peak_ | 6.03           | + |
| chr2 | 13256353 | 13256402 | CSAR_peak_ | 8.39           | + |
| chr2 | 13256446 | 13256485 | CSAR_peak_ | 6.21           | + |
| chr2 | 13256939 | 13257072 | CSAR_peak_ | 8.39           | + |
| chr2 | 13257236 | 13257342 | CSAR_peak_ | 6.03,12.13     | + |
| chr2 | 13257379 | 13257437 | CSAR_peak_ | 9.58,8.39      | + |
| chr2 | 13339713 | 13339776 | CSAR_peak_ | 7.27           | + |
| chr2 | 13343156 | 13343197 | CSAR_peak_ | 6.03           | + |
| chr2 | 13369375 | 13369460 | CSAR_peak_ | 9.58           | + |
| chr2 | 13379409 | 13379459 | CSAR_peak_ | 7.26           | + |
| chr2 | 13379929 | 13379966 | CSAR_peak_ | 12.13          | + |
| chr2 | 13379995 | 13380059 | CSAR_peak_ | 9.58,8.39      | + |
| chr2 | 13380295 | 13380403 | CSAR_peak_ | 8.3,5.62       | + |
| chr2 | 13380524 | 13380622 | CSAR_peak_ | 12.5,8.5       | + |
| chr2 | 13380704 | 13380761 | CSAR_peak_ | 7.27           | + |
| chr2 | 13380765 | 13380830 | CSAR_peak_ | 14.76,6.03     | + |
| chr2 | 13380888 | 13381104 | CSAR_peak_ | 6.57,8.39,11.  | + |
| chr2 | 13381140 | 13381282 | CSAR_peak_ | 16.19,12.13,:  | + |
| chr2 | 13381806 | 13381900 | CSAR_peak_ | 8.92,11.14,6.  | + |
| chr2 | 13382140 | 13382183 | CSAR_peak_ | 6.21           | + |
| chr2 | 13382594 | 13382639 | CSAR_peak_ | 6.95           | + |
| chr2 | 13382663 | 13382699 | CSAR_peak_ | 6.21           | + |
| chr2 | 13382914 | 13383004 | CSAR_peak_ | 9.61,6.95      | + |
| chr2 | 13383042 | 13383094 | CSAR_peak_ | 13.48          | + |
| chr2 | 13383558 | 13383630 | CSAR_peak_ | 10.95,7.27     | + |
| chr2 | 13383877 | 13384003 | CSAR_peak_ | 12.13,17.51,(+ |   |
| chr2 | 13384508 | 13384558 | CSAR_peak_ | 6.21           | + |
| chr2 | 13471223 | 13471272 | CSAR_peak_ | 6.57           | + |
| chr2 | 13524463 | 13524553 | CSAR_peak_ | 8.65,6.57,6.4+ |   |

|      |          |          |             |                |   |
|------|----------|----------|-------------|----------------|---|
| chr2 | 13524626 | 13524667 | CSAR_peak_! | 9.54           | + |
| chr2 | 13524725 | 13524756 | CSAR_peak_! | 6.21           | + |
| chr2 | 13524917 | 13524979 | CSAR_peak_! | 6.57,16.33,1.  | + |
| chr2 | 13524997 | 13525049 | CSAR_peak_! | 13.02          | + |
| chr2 | 13525174 | 13525251 | CSAR_peak_! | 14.54,11.64,.  | + |
| chr2 | 13525659 | 13525710 | CSAR_peak_! | 6.03           | + |
| chr2 | 13525775 | 13525832 | CSAR_peak_! | 9.68,13.37     | + |
| chr2 | 13525914 | 13526001 | CSAR_peak_! | 6.85,7.29,13.  | + |
| chr2 | 13526348 | 13526402 | CSAR_peak_! | 7.27,6.03      | + |
| chr2 | 13526460 | 13526519 | CSAR_peak_! | 10.31          | + |
| chr2 | 13526796 | 13526821 | CSAR_peak_! | 6.21           | + |
| chr2 | 13526947 | 13527105 | CSAR_peak_! | 10.96,11.45,(+ |   |
| chr2 | 13527338 | 13527434 | CSAR_peak_! | 8.95,22.56     | + |
| chr2 | 13527496 | 13527555 | CSAR_peak_! | 10.62          | + |
| chr2 | 13527754 | 13527815 | CSAR_peak_! | 13.48,5.62,1.  | + |
| chr2 | 13528026 | 13528171 | CSAR_peak_! | 13.48,10.83,!  | + |
| chr2 | 13528246 | 13528285 | CSAR_peak_! | 7.27           | + |
| chr2 | 13529514 | 13529590 | CSAR_peak_! | 7.27           | + |
| chr2 | 13530300 | 13530369 | CSAR_peak_! | 7.27           | + |
| chr2 | 13530449 | 13530684 | CSAR_peak_! | 17.82,7.58,8.  | + |
| chr2 | 13530814 | 13530880 | CSAR_peak_! | 9.97,8.39      | + |
| chr2 | 13531270 | 13531316 | CSAR_peak_! | 9.58           | + |
| chr2 | 13531479 | 13531532 | CSAR_peak_! | 6.21           | + |
| chr2 | 13531802 | 13531875 | CSAR_peak_! | 10.83          | + |
| chr2 | 13532324 | 13532370 | CSAR_peak_! | 7.27           | + |
| chr2 | 13532559 | 13532608 | CSAR_peak_! | 9.58           | + |
| chr2 | 13533787 | 13533839 | CSAR_peak_! | 7.27           | + |
| chr2 | 13534362 | 13534436 | CSAR_peak_! | 7.27,6.22,6.5  | + |
| chr2 | 13535641 | 13535699 | CSAR_peak_! | 9.58           | + |
| chr2 | 13591093 | 13591131 | CSAR_peak_! | 12.17          | + |
| chr2 | 13591148 | 13591185 | CSAR_peak_! | 7.58           | + |
| chr2 | 13591365 | 13591424 | CSAR_peak_! | 6.03           | + |
| chr2 | 13591733 | 13591754 | CSAR_peak_! | 7.34           | + |
| chr2 | 13592175 | 13592202 | CSAR_peak_! | 13.48          | + |
| chr2 | 13592486 | 13592580 | CSAR_peak_! | 17.52          | + |
| chr2 | 13594123 | 13594168 | CSAR_peak_! | 6.21           | + |
| chr2 | 13594602 | 13594656 | CSAR_peak_! | 9.58           | + |
| chr2 | 13594743 | 13594793 | CSAR_peak_! | 6.57           | + |
| chr2 | 13594922 | 13595002 | CSAR_peak_! | 7.73,13.48     | + |
| chr2 | 13595198 | 13595293 | CSAR_peak_! | 9.58,6.57      | + |
| chr2 | 13595434 | 13595482 | CSAR_peak_! | 15             | + |
| chr2 | 13596351 | 13596399 | CSAR_peak_! | 6.37           | + |



|      |          |          |            |                |   |
|------|----------|----------|------------|----------------|---|
| chr2 | 13596570 | 13596600 | CSAR_peak_ | 7.58           | + |
| chr2 | 13597406 | 13597452 | CSAR_peak_ | 8.95           | + |
| chr2 | 13597606 | 13597671 | CSAR_peak_ | 13.51,8.39     | + |
| chr2 | 13603600 | 13603655 | CSAR_peak_ | 6.57,6.21      | + |
| chr2 | 13604563 | 13604626 | CSAR_peak_ | 14.88,7.27     | + |
| chr2 | 13606522 | 13606617 | CSAR_peak_ | 9.58,7.27      | + |
| chr2 | 13607514 | 13607556 | CSAR_peak_ | 6.21           | + |
| chr2 | 13607857 | 13607946 | CSAR_peak_ | 7.58           | + |
| chr2 | 13627476 | 13627525 | CSAR_peak_ | 5.62           | + |
| chr2 | 13659071 | 13659493 | CSAR_peak_ | 13.47,9.27,8.  | + |
| chr2 | 13659545 | 13659607 | CSAR_peak_ | 11.41,13.02    | + |
| chr2 | 13659625 | 13659920 | CSAR_peak_ | 25.33,6.14,9.  | + |
| chr2 | 13660044 | 13660133 | CSAR_peak_ | 14.09,14.76,   | + |
| chr2 | 13660152 | 13660280 | CSAR_peak_ | 23.32,5.87,1(+ |   |
| chr2 | 13660300 | 13660583 | CSAR_peak_ | 59.17,114.85+  |   |
| chr2 | 13660605 | 13660715 | CSAR_peak_ | 10.53,10.25    | + |
| chr2 | 13661088 | 13661137 | CSAR_peak_ | 6.21           | + |
| chr2 | 13662285 | 13662356 | CSAR_peak_ | 5.62           | + |
| chr2 | 13698310 | 13698368 | CSAR_peak_ | 7.27           | + |
| chr2 | 13698850 | 13698882 | CSAR_peak_ | 6.57           | + |
| chr2 | 13728286 | 13728329 | CSAR_peak_ | 8.39           | + |
| chr2 | 13728697 | 13728754 | CSAR_peak_ | 6.57,6.95      | + |
| chr2 | 13729194 | 13729207 | CSAR_peak_ | 7.27           | + |
| chr2 | 13729554 | 13729625 | CSAR_peak_ | 14.34          | + |
| chr2 | 13731294 | 13731350 | CSAR_peak_ | 7.92           | + |
| chr2 | 13732277 | 13732303 | CSAR_peak_ | 7.27           | + |
| chr2 | 13732407 | 13732472 | CSAR_peak_ | 5.62,8.95      | + |
| chr2 | 13733154 | 13733212 | CSAR_peak_ | 7.27           | + |
| chr2 | 13734037 | 13734075 | CSAR_peak_ | 7.27           | + |
| chr2 | 13734084 | 13734149 | CSAR_peak_ | 7.58,10.83     | + |
| chr2 | 13776071 | 13776121 | CSAR_peak_ | 10.83          | + |
| chr2 | 13776752 | 13776933 | CSAR_peak_ | 7.27,10.95,8.  | + |
| chr2 | 13776938 | 13776982 | CSAR_peak_ | 5.62,6.21      | + |
| chr2 | 13828991 | 13829038 | CSAR_peak_ | 6.03           | + |
| chr2 | 13867227 | 13867267 | CSAR_peak_ | 8.39           | + |
| chr2 | 13867341 | 13867383 | CSAR_peak_ | 7.27           | + |
| chr2 | 13867512 | 13867549 | CSAR_peak_ | 6.21           | + |
| chr2 | 13867550 | 13867636 | CSAR_peak_ | 6.64,6.91,7.3+ |   |
| chr2 | 13867902 | 13867941 | CSAR_peak_ | 7.73           | + |
| chr2 | 13868145 | 13868172 | CSAR_peak_ | 6.21           | + |
| chr2 | 13868347 | 13868387 | CSAR_peak_ | 7.06           | + |
| chr2 | 13869014 | 13869046 | CSAR_peak_ | 5.62           | + |

|      |          |          |             |               |   |
|------|----------|----------|-------------|---------------|---|
| chr2 | 13870126 | 13870170 | CSAR_peak_! | 5.7           | + |
| chr2 | 13870176 | 13870186 | CSAR_peak_! | 6.92          | + |
| chr2 | 13870188 | 13870223 | CSAR_peak_! | 8.01          | + |
| chr2 | 13870224 | 13870329 | CSAR_peak_! | 34.89,6.95,6. | + |
| chr2 | 13870348 | 13870407 | CSAR_peak_! | 16.33         | + |
| chr2 | 13870409 | 13870470 | CSAR_peak_! | 7.27,10.7,10. | + |
| chr2 | 13870594 | 13870601 | CSAR_peak_! | 6.87          | + |
| chr2 | 13870659 | 13870744 | CSAR_peak_! | 9.03,5.95,7.2 | + |
| chr2 | 13870916 | 13870964 | CSAR_peak_! | 6.21          | + |
| chr2 | 13871548 | 13871574 | CSAR_peak_! | 8.39          | + |
| chr2 | 13871701 | 13871731 | CSAR_peak_! | 14.88         | + |
| chr2 | 13874947 | 13875102 | CSAR_peak_! | 7.58,8.39,8.3 | + |
| chr2 | 13884856 | 13884908 | CSAR_peak_! | 6.57          | + |
| chr2 | 13979310 | 13979359 | CSAR_peak_! | 6.95          | + |
| chr2 | 13979367 | 13979424 | CSAR_peak_! | 6.21          | + |
| chr2 | 13979468 | 13979515 | CSAR_peak_! | 6.21          | + |
| chr2 | 13981536 | 13981586 | CSAR_peak_! | 6.95          | + |
| chr2 | 13982378 | 13982408 | CSAR_peak_! | 7.27          | + |
| chr2 | 13982890 | 13982900 | CSAR_peak_! | 6.57          | + |
| chr2 | 14151595 | 14151656 | CSAR_peak_! | 17.82         | + |
| chr2 | 14151747 | 14151791 | CSAR_peak_! | 10.83         | + |
| chr2 | 14151866 | 14151935 | CSAR_peak_! | 7.58,7.92     | + |
| chr2 | 14152636 | 14152683 | CSAR_peak_! | 9.58          | + |
| chr2 | 14163625 | 14163770 | CSAR_peak_! | 58.95,45.59,1 | + |
| chr2 | 14163799 | 14163827 | CSAR_peak_! | 6.21          | + |
| chr2 | 14163829 | 14163976 | CSAR_peak_! | 24.37,36.73,! | + |
| chr2 | 14166638 | 14166690 | CSAR_peak_! | 7.27          | + |
| chr2 | 14167004 | 14167044 | CSAR_peak_! | 6.21          | + |
| chr2 | 14167188 | 14167242 | CSAR_peak_! | 7.27          | + |
| chr2 | 14167341 | 14167427 | CSAR_peak_! | 9.58          | + |
| chr2 | 14167878 | 14168006 | CSAR_peak_! | 7.27,12.13    | + |
| chr2 | 14168223 | 14168278 | CSAR_peak_! | 6.21          | + |
| chr2 | 14172742 | 14172789 | CSAR_peak_! | 7.92          | + |
| chr2 | 14172901 | 14172968 | CSAR_peak_! | 17.82         | + |
| chr2 | 14183629 | 14183663 | CSAR_peak_! | 7.27          | + |
| chr2 | 14185786 | 14185836 | CSAR_peak_! | 10.02         | + |
| chr2 | 14195105 | 14195156 | CSAR_peak_! | 7.27,6.85     | + |
| chr2 | 14462625 | 14462675 | CSAR_peak_! | 7.73          | + |
| chr2 | 14462842 | 14462891 | CSAR_peak_! | 8.39          | + |
| chr2 | 14463204 | 14463228 | CSAR_peak_! | 6.57          | + |
| chr2 | 14463681 | 14463720 | CSAR_peak_! | 6.57          | + |
| chr2 | 14464192 | 14464248 | CSAR_peak_! | 10.83,8.65    | + |

|      |          |          |            |               |   |
|------|----------|----------|------------|---------------|---|
| chr2 | 14464325 | 14464412 | CSAR_peak_ | 16.05,16.11   | + |
| chr2 | 14503608 | 14503656 | CSAR_peak_ | 5.62          | + |
| chr2 | 14525337 | 14525378 | CSAR_peak_ | 6.1           | + |
| chr2 | 14573188 | 14573503 | CSAR_peak_ | 11.35,50.34,  | + |
| chr2 | 14573546 | 14573645 | CSAR_peak_ | 11.96,9.77    | + |
| chr2 | 14573662 | 14573726 | CSAR_peak_ | 7.73,14.88    | + |
| chr2 | 14573832 | 14573882 | CSAR_peak_ | 9.27          | + |
| chr2 | 14574072 | 14574128 | CSAR_peak_ | 10.02         | + |
| chr2 | 14574160 | 14574205 | CSAR_peak_ | 6.21          | + |
| chr2 | 14574328 | 14574456 | CSAR_peak_ | 17.52,8.95    | + |
| chr2 | 14574588 | 14574680 | CSAR_peak_ | 8.39,8.39     | + |
| chr2 | 14604662 | 14604713 | CSAR_peak_ | 6.57,6.95     | + |
| chr2 | 14607346 | 14607366 | CSAR_peak_ | 6.21          | + |
| chr2 | 14609314 | 14609364 | CSAR_peak_ | 8.65,8.95     | + |
| chr2 | 14667961 | 14668011 | CSAR_peak_ | 6.21          | + |
| chr2 | 14772489 | 14772549 | CSAR_peak_ | 12.13         | + |
| chr2 | 14773699 | 14773784 | CSAR_peak_ | 14.85         | + |
| chr2 | 14773860 | 14773920 | CSAR_peak_ | 9.41          | + |
| chr2 | 14849546 | 14849604 | CSAR_peak_ | 16.33         | + |
| chr2 | 14849757 | 14849812 | CSAR_peak_ | 10.83         | + |
| chr2 | 14849817 | 14849887 | CSAR_peak_ | 10.58         | + |
| chr2 | 14849937 | 14850006 | CSAR_peak_ | 10.35,9.41,1. | + |
| chr2 | 14850132 | 14850195 | CSAR_peak_ | 18.35,6.36    | + |
| chr2 | 14850217 | 14850272 | CSAR_peak_ | 6.95          | + |
| chr2 | 14850373 | 14850409 | CSAR_peak_ | 16.33         | + |
| chr2 | 14850420 | 14850469 | CSAR_peak_ | 6.03,6.21     | + |
| chr2 | 14850550 | 14850560 | CSAR_peak_ | 7.27          | + |
| chr2 | 14850718 | 14850767 | CSAR_peak_ | 11.63         | + |
| chr2 | 14851078 | 14851116 | CSAR_peak_ | 10.02         | + |
| chr2 | 14851261 | 14851279 | CSAR_peak_ | 6.44          | + |
| chr2 | 14851301 | 14851350 | CSAR_peak_ | 6.21          | + |
| chr2 | 14851579 | 14851605 | CSAR_peak_ | 8.39          | + |
| chr2 | 14870755 | 14870826 | CSAR_peak_ | 7.73          | + |
| chr2 | 14899489 | 14899555 | CSAR_peak_ | 6.21          | + |
| chr2 | 14966827 | 14966923 | CSAR_peak_ | 6.57          | + |
| chr2 | 14968240 | 14968310 | CSAR_peak_ | 12.31,6.03,6. | + |
| chr2 | 14968473 | 14968585 | CSAR_peak_ | 9.58,9.77     | + |
| chr2 | 14968903 | 14968946 | CSAR_peak_ | 7.27          | + |
| chr2 | 14969232 | 14969253 | CSAR_peak_ | 9.58          | + |
| chr2 | 14969265 | 14969315 | CSAR_peak_ | 14.76         | + |
| chr2 | 14969463 | 14969495 | CSAR_peak_ | 6.96          | + |
| chr2 | 14970040 | 14970091 | CSAR_peak_ | 13.48         | + |

|      |          |          |            |               |   |
|------|----------|----------|------------|---------------|---|
| chr2 | 14971193 | 14971293 | CSAR_peak_ | 9.58          | + |
| chr2 | 14971384 | 14971422 | CSAR_peak_ | 7.27          | + |
| chr2 | 14972136 | 14972194 | CSAR_peak_ | 11.38         | + |
| chr2 | 14972576 | 14972631 | CSAR_peak_ | 10.96,11.34   | + |
| chr2 | 14973611 | 14973631 | CSAR_peak_ | 6.03          | + |
| chr2 | 14973970 | 14974031 | CSAR_peak_ | 12.13         | + |
| chr2 | 14974146 | 14974165 | CSAR_peak_ | 8.53          | + |
| chr2 | 14974224 | 14974271 | CSAR_peak_ | 8.3           | + |
| chr2 | 14974369 | 14974436 | CSAR_peak_ | 6.57,8.39     | + |
| chr2 | 14974682 | 14974714 | CSAR_peak_ | 7.27          | + |
| chr2 | 14974815 | 14974844 | CSAR_peak_ | 6.45          | + |
| chr2 | 14975521 | 14975569 | CSAR_peak_ | 7.26          | + |
| chr2 | 14975646 | 14975742 | CSAR_peak_ | 8.39          | + |
| chr2 | 14976078 | 14976147 | CSAR_peak_ | 7.26          | + |
| chr2 | 14976327 | 14976461 | CSAR_peak_ | 10.96,13.48   | + |
| chr2 | 14976628 | 14976681 | CSAR_peak_ | 7.27          | + |
| chr2 | 14976887 | 14976923 | CSAR_peak_ | 7.27          | + |
| chr2 | 14977027 | 14977107 | CSAR_peak_ | 7.68,16.11    | + |
| chr2 | 14977524 | 14977563 | CSAR_peak_ | 7.58          | + |
| chr2 | 14977929 | 14977986 | CSAR_peak_ | 14.63         | + |
| chr2 | 14978129 | 14978170 | CSAR_peak_ | 6.95,6.21     | + |
| chr2 | 14979709 | 14979755 | CSAR_peak_ | 6.03,10.95    | + |
| chr2 | 14979983 | 14980027 | CSAR_peak_ | 6.21,9.58     | + |
| chr2 | 14981551 | 14981604 | CSAR_peak_ | 6.21          | + |
| chr2 | 14986266 | 14986304 | CSAR_peak_ | 8.28,6.57     | + |
| chr2 | 14987215 | 14987315 | CSAR_peak_ | 6.52,7.26,7.7 | + |
| chr2 | 14987887 | 14987931 | CSAR_peak_ | 13.48         | + |
| chr2 | 14988013 | 14988045 | CSAR_peak_ | 5.62          | + |
| chr2 | 15044511 | 15044567 | CSAR_peak_ | 14.88         | + |
| chr2 | 15044754 | 15044822 | CSAR_peak_ | 6.03,7.27     | + |
| chr2 | 15045960 | 15046001 | CSAR_peak_ | 7.92          | + |
| chr2 | 15046021 | 15046094 | CSAR_peak_ | 8.39          | + |
| chr2 | 15047060 | 15047070 | CSAR_peak_ | 6.03          | + |
| chr2 | 15047146 | 15047208 | CSAR_peak_ | 9.58,6.37     | + |
| chr2 | 15047885 | 15047925 | CSAR_peak_ | 8.19,7.78     | + |
| chr2 | 15048008 | 15048078 | CSAR_peak_ | 6.31,8.65     | + |
| chr2 | 15079233 | 15079297 | CSAR_peak_ | 8.28,8.39,5.6 | + |
| chr2 | 15079298 | 15079381 | CSAR_peak_ | 10.02,12.13,  | + |
| chr2 | 15080533 | 15080599 | CSAR_peak_ | 6.21          | + |
| chr2 | 15165553 | 15165589 | CSAR_peak_ | 8.59          | + |
| chr2 | 15165601 | 15166225 | CSAR_peak_ | 44.38,49.13,  | + |
| chr2 | 15166237 | 15166253 | CSAR_peak_ | 6.37          | + |

|      |          |          |            |                |   |
|------|----------|----------|------------|----------------|---|
| chr2 | 15192932 | 15192996 | CSAR_peak_ | 6.21,8.65      | + |
| chr2 | 15193013 | 15193056 | CSAR_peak_ | 7.27           | + |
| chr2 | 15193123 | 15193223 | CSAR_peak_ | 8.39           | + |
| chr2 | 15193252 | 15193372 | CSAR_peak_ | 10.7,8.3,8.52  | + |
| chr2 | 15193452 | 15193504 | CSAR_peak_ | 7.27           | + |
| chr2 | 15229125 | 15229168 | CSAR_peak_ | 12.13,8.39     | + |
| chr2 | 15229406 | 15229458 | CSAR_peak_ | 7.27           | + |
| chr2 | 15229749 | 15229779 | CSAR_peak_ | 8.3            | + |
| chr2 | 15230409 | 15230453 | CSAR_peak_ | 6.21           | + |
| chr2 | 15257727 | 15257775 | CSAR_peak_ | 8.3            | + |
| chr2 | 15257912 | 15257980 | CSAR_peak_ | 12.54,7.78,7.  | + |
| chr2 | 15259109 | 15259158 | CSAR_peak_ | 7.13           | + |
| chr2 | 15259555 | 15259615 | CSAR_peak_ | 9.77           | + |
| chr2 | 15260489 | 15260524 | CSAR_peak_ | 6.03           | + |
| chr2 | 15260540 | 15260598 | CSAR_peak_ | 9.72,9.31      | + |
| chr2 | 15260679 | 15260710 | CSAR_peak_ | 10.83,6.03     | + |
| chr2 | 15260766 | 15260846 | CSAR_peak_ | 19.36,9.27,1.  | + |
| chr2 | 15260964 | 15261016 | CSAR_peak_ | 16.05          | + |
| chr2 | 15261081 | 15261126 | CSAR_peak_ | 7.27,7.58      | + |
| chr2 | 15262101 | 15262172 | CSAR_peak_ | 12.6,7.26      | + |
| chr2 | 15262312 | 15262369 | CSAR_peak_ | 8.39           | + |
| chr2 | 15263040 | 15263077 | CSAR_peak_ | 7.27           | + |
| chr2 | 15263090 | 15263202 | CSAR_peak_ | 10.95          | + |
| chr2 | 15263368 | 15263424 | CSAR_peak_ | 6.02           | + |
| chr2 | 15264995 | 15265047 | CSAR_peak_ | 11.66          | + |
| chr2 | 15265127 | 15265187 | CSAR_peak_ | 14.76          | + |
| chr2 | 15265540 | 15265626 | CSAR_peak_ | 8.39,6.95      | + |
| chr2 | 15266347 | 15266383 | CSAR_peak_ | 12.17          | + |
| chr2 | 15267116 | 15267155 | CSAR_peak_ | 6.22           | + |
| chr2 | 15267512 | 15267533 | CSAR_peak_ | 6.03           | + |
| chr2 | 15268287 | 15268320 | CSAR_peak_ | 6.21           | + |
| chr2 | 15268537 | 15268599 | CSAR_peak_ | 9.58           | + |
| chr2 | 15269405 | 15269455 | CSAR_peak_ | 9.58           | + |
| chr2 | 15278940 | 15278979 | CSAR_peak_ | 7.27           | + |
| chr2 | 15279000 | 15279092 | CSAR_peak_ | 12.6,8.09      | + |
| chr2 | 15279304 | 15279356 | CSAR_peak_ | 6.21,8.39      | + |
| chr2 | 15279486 | 15279528 | CSAR_peak_ | 6.21           | + |
| chr2 | 15279631 | 15279731 | CSAR_peak_ | 8.39,6.95      | + |
| chr2 | 15279764 | 15279819 | CSAR_peak_ | 10.94,9.79     | + |
| chr2 | 15279828 | 15279881 | CSAR_peak_ | 6.21           | + |
| chr2 | 15279966 | 15280143 | CSAR_peak_ | 15,5.97,8.61,  | + |
| chr2 | 15280164 | 15280260 | CSAR_peak_ | 7.58,24.52,1(+ | + |

|      |          |          |            |               |   |
|------|----------|----------|------------|---------------|---|
| chr2 | 15286815 | 15286866 | CSAR_peak_ | 6.21          | + |
| chr2 | 15286990 | 15287016 | CSAR_peak_ | 6.57          | + |
| chr2 | 15287142 | 15287161 | CSAR_peak_ | 6.03          | + |
| chr2 | 15287525 | 15287583 | CSAR_peak_ | 8.39          | + |
| chr2 | 15288141 | 15288181 | CSAR_peak_ | 8.39          | + |
| chr2 | 15288197 | 15288223 | CSAR_peak_ | 8.95,8.39     | + |
| chr2 | 15288224 | 15288273 | CSAR_peak_ | 10.02,5.62    | + |
| chr2 | 15288533 | 15288565 | CSAR_peak_ | 6.44          | + |
| chr2 | 15288607 | 15288666 | CSAR_peak_ | 6.57          | + |
| chr2 | 15288683 | 15288879 | CSAR_peak_ | 16.05,21.11   | + |
| chr2 | 15340608 | 15340646 | CSAR_peak_ | 9.58          | + |
| chr2 | 15340774 | 15340788 | CSAR_peak_ | 7.27          | + |
| chr2 | 15360587 | 15360635 | CSAR_peak_ | 7.27          | + |
| chr2 | 15395202 | 15395250 | CSAR_peak_ | 6.21          | + |
| chr2 | 15395862 | 15395912 | CSAR_peak_ | 8.65          | + |
| chr2 | 15396002 | 15396050 | CSAR_peak_ | 6.21,6.21     | + |
| chr2 | 15397602 | 15397653 | CSAR_peak_ | 9.58          | + |
| chr2 | 15446186 | 15446276 | CSAR_peak_ | 9.77          | + |
| chr2 | 15572481 | 15572556 | CSAR_peak_ | 14.88,12.31   | + |
| chr2 | 15572728 | 15572779 | CSAR_peak_ | 8.39          | + |
| chr2 | 15592707 | 15592774 | CSAR_peak_ | 9.58          | + |
| chr2 | 15592826 | 15592917 | CSAR_peak_ | 8.28,8.39     | + |
| chr2 | 15593156 | 15593187 | CSAR_peak_ | 10.83         | + |
| chr2 | 15611063 | 15611108 | CSAR_peak_ | 6.21          | + |
| chr2 | 15643645 | 15643791 | CSAR_peak_ | 26.86,23.69,  | + |
| chr2 | 15738755 | 15738846 | CSAR_peak_ | 8.39,6.95     | + |
| chr2 | 15832872 | 15832913 | CSAR_peak_ | 8.39          | + |
| chr2 | 15853133 | 15853176 | CSAR_peak_ | 5.62          | + |
| chr2 | 15854602 | 15854673 | CSAR_peak_ | 6.21          | + |
| chr2 | 15855619 | 15855671 | CSAR_peak_ | 6.1           | + |
| chr2 | 15877153 | 15877202 | CSAR_peak_ | 16.33         | + |
| chr2 | 15877285 | 15877375 | CSAR_peak_ | 10.83,8.39    | + |
| chr2 | 15877673 | 15877743 | CSAR_peak_ | 6.21          | + |
| chr2 | 15877804 | 15877861 | CSAR_peak_ | 12.31         | + |
| chr2 | 15878455 | 15878516 | CSAR_peak_ | 6.95          | + |
| chr2 | 15878681 | 15878725 | CSAR_peak_ | 8.65,8.39     | + |
| chr2 | 15878856 | 15878895 | CSAR_peak_ | 6.21          | + |
| chr2 | 15878989 | 15879027 | CSAR_peak_ | 10.95         | + |
| chr2 | 15879132 | 15879245 | CSAR_peak_ | 5.92,8.65,6.4 | + |
| chr2 | 15879387 | 15879459 | CSAR_peak_ | 8.65          | + |
| chr2 | 15917887 | 15917951 | CSAR_peak_ | 7.77,11.34,5. | + |
| chr2 | 15918052 | 15918127 | CSAR_peak_ | 7.9,6.64      | + |

|      |          |          |            |               |   |
|------|----------|----------|------------|---------------|---|
| chr2 | 15918261 | 15918348 | CSAR_peak_ | 13.48,8.5     | + |
| chr2 | 15918488 | 15918554 | CSAR_peak_ | 8.65          | + |
| chr2 | 15918561 | 15918603 | CSAR_peak_ | 5.92          | + |
| chr2 | 15918723 | 15918761 | CSAR_peak_ | 7.34          | + |
| chr2 | 15918797 | 15918848 | CSAR_peak_ | 8.18,7.92     | + |
| chr2 | 15918919 | 15918968 | CSAR_peak_ | 14.61         | + |
| chr2 | 15919009 | 15919052 | CSAR_peak_ | 11.14         | + |
| chr2 | 15919253 | 15919353 | CSAR_peak_ | 6.21,17.28,1  | + |
| chr2 | 15919407 | 15919474 | CSAR_peak_ | 6.21          | + |
| chr2 | 15919487 | 15919612 | CSAR_peak_ | 13.44,14.88,  | + |
| chr2 | 15919694 | 15919886 | CSAR_peak_ | 12.5,8.95,6.1 | + |
| chr2 | 15919935 | 15920011 | CSAR_peak_ | 7.26,13.48    | + |
| chr2 | 15920457 | 15920498 | CSAR_peak_ | 6.57          | + |
| chr2 | 15920651 | 15920697 | CSAR_peak_ | 9.32          | + |
| chr2 | 15973500 | 15973580 | CSAR_peak_ | 7.27          | + |
| chr2 | 15974771 | 15974806 | CSAR_peak_ | 7.27          | + |
| chr2 | 16067094 | 16067138 | CSAR_peak_ | 7.34          | + |
| chr2 | 16083771 | 16083814 | CSAR_peak_ | 6.85          | + |
| chr2 | 16084614 | 16084672 | CSAR_peak_ | 9.77          | + |
| chr2 | 16084711 | 16084773 | CSAR_peak_ | 6.95          | + |
| chr2 | 16084952 | 16084994 | CSAR_peak_ | 16.33,12.17   | + |
| chr2 | 16085044 | 16085177 | CSAR_peak_ | 17.82,6.37,6. | + |
| chr2 | 16085274 | 16085399 | CSAR_peak_ | 7.27,16.33    | + |
| chr2 | 16085409 | 16085488 | CSAR_peak_ | 7.92,14.76,1  | + |
| chr2 | 16085546 | 16085567 | CSAR_peak_ | 8.39          | + |
| chr2 | 16085642 | 16085700 | CSAR_peak_ | 6.87,9.31,8.6 | + |
| chr2 | 16085765 | 16085768 | CSAR_peak_ | 6.44          | + |
| chr2 | 16085794 | 16085852 | CSAR_peak_ | 6.21          | + |
| chr2 | 16100479 | 16100522 | CSAR_peak_ | 14.88,7.34,5. | + |
| chr2 | 16100798 | 16100846 | CSAR_peak_ | 8.92,12.17    | + |
| chr2 | 16102199 | 16102257 | CSAR_peak_ | 8.39          | + |
| chr2 | 16109162 | 16109175 | CSAR_peak_ | 7.34          | + |
| chr2 | 16109222 | 16109315 | CSAR_peak_ | 8.39,14.92    | + |
| chr2 | 16109433 | 16109504 | CSAR_peak_ | 11.14         | + |
| chr2 | 16109625 | 16109682 | CSAR_peak_ | 8.39          | + |
| chr2 | 16109879 | 16109945 | CSAR_peak_ | 6.53,5.77     | + |
| chr2 | 16109997 | 16110029 | CSAR_peak_ | 6.57,6.57     | + |
| chr2 | 16110383 | 16110434 | CSAR_peak_ | 9.58          | + |
| chr2 | 16110687 | 16110751 | CSAR_peak_ | 7.27          | + |
| chr2 | 16130385 | 16130457 | CSAR_peak_ | 17.82,10.02   | + |
| chr2 | 16139927 | 16139974 | CSAR_peak_ | 9.58          | + |
| chr2 | 16140118 | 16140147 | CSAR_peak_ | 7.27          | + |

|      |          |          |             |                |   |
|------|----------|----------|-------------|----------------|---|
| chr2 | 16140249 | 16140312 | CSAR_peak_! | 6.57,13.48     | + |
| chr2 | 16140390 | 16140439 | CSAR_peak_! | 7.68           | + |
| chr2 | 16140564 | 16140593 | CSAR_peak_! | 6.21           | + |
| chr2 | 16169538 | 16169613 | CSAR_peak_! | 8.39           | + |
| chr2 | 16218659 | 16218709 | CSAR_peak_! | 7.27           | + |
| chr2 | 16221965 | 16222007 | CSAR_peak_! | 6.21           | + |
| chr2 | 16222503 | 16222554 | CSAR_peak_! | 7.26           | + |
| chr2 | 16222598 | 16222646 | CSAR_peak_! | 6.21,10.83     | + |
| chr2 | 16222706 | 16222751 | CSAR_peak_! | 7.58           | + |
| chr2 | 16222771 | 16222834 | CSAR_peak_! | 14.76          | + |
| chr2 | 16223249 | 16223309 | CSAR_peak_! | 7.27           | + |
| chr2 | 16223317 | 16223362 | CSAR_peak_! | 6.21           | + |
| chr2 | 16225081 | 16225145 | CSAR_peak_! | 9.58           | + |
| chr2 | 16230266 | 16230320 | CSAR_peak_! | 7.27           | + |
| chr2 | 16291808 | 16291868 | CSAR_peak_! | 14,17.35       | + |
| chr2 | 16291995 | 16292104 | CSAR_peak_! | 33.75          | + |
| chr2 | 16292309 | 16292549 | CSAR_peak_! | 35.83,31.19,(+ |   |
| chr2 | 16292613 | 16292679 | CSAR_peak_! | 9.77,11.96     | + |
| chr2 | 16292789 | 16292873 | CSAR_peak_! | 10.83,16.33    | + |
| chr2 | 16292923 | 16292983 | CSAR_peak_! | 9.58,9.77      | + |
| chr2 | 16293320 | 16293439 | CSAR_peak_! | 18.73,14.08,(+ |   |
| chr2 | 16293468 | 16293611 | CSAR_peak_! | 15.68,8.13,1(+ |   |
| chr2 | 16293618 | 16293623 | CSAR_peak_! | 7.36           | + |
| chr2 | 16293642 | 16293667 | CSAR_peak_! | 6.57           | + |
| chr2 | 16293738 | 16293783 | CSAR_peak_! | 11.88,14.88    | + |
| chr2 | 16293825 | 16293915 | CSAR_peak_! | 20.43,19.68    | + |
| chr2 | 16293925 | 16293939 | CSAR_peak_! | 6.21           | + |
| chr2 | 16294591 | 16294651 | CSAR_peak_! | 7.27,6.21      | + |
| chr2 | 16352219 | 16352250 | CSAR_peak_! | 6.57           | + |
| chr2 | 16426322 | 16426332 | CSAR_peak_! | 6.21           | + |
| chr2 | 16426354 | 16426387 | CSAR_peak_! | 7.27           | + |
| chr2 | 16426533 | 16426552 | CSAR_peak_! | 5.62,7.27      | + |
| chr2 | 16429207 | 16429251 | CSAR_peak_! | 9.77           | + |
| chr2 | 16429346 | 16429393 | CSAR_peak_! | 7.27           | + |
| chr2 | 16452686 | 16452743 | CSAR_peak_! | 7.34,10.02     | + |
| chr2 | 16452870 | 16452966 | CSAR_peak_! | 14.88,6.21,6.+ |   |
| chr2 | 16453103 | 16453158 | CSAR_peak_! | 6.45,6.57      | + |
| chr2 | 16453418 | 16453478 | CSAR_peak_! | 10.95,10.62,(+ |   |
| chr2 | 16453899 | 16453960 | CSAR_peak_! | 14.76,8.39,6.+ |   |
| chr2 | 16454001 | 16454072 | CSAR_peak_! | 9.58,8.39      | + |
| chr2 | 16454396 | 16454491 | CSAR_peak_! | 10.83          | + |
| chr2 | 16454507 | 16454610 | CSAR_peak_! | 6.44           | + |



|      |          |          |            |               |   |
|------|----------|----------|------------|---------------|---|
| chr2 | 16454612 | 16454657 | CSAR_peak_ | 6.21          | + |
| chr2 | 16460536 | 16460590 | CSAR_peak_ | 11.38         | + |
| chr2 | 16460754 | 16460811 | CSAR_peak_ | 8.39,8.13     | + |
| chr2 | 16461456 | 16461467 | CSAR_peak_ | 8.39          | + |
| chr2 | 16462184 | 16462211 | CSAR_peak_ | 6.57          | + |
| chr2 | 16462413 | 16462509 | CSAR_peak_ | 7.58,10.95,6. | + |
| chr2 | 16462623 | 16462718 | CSAR_peak_ | 7.34          | + |
| chr2 | 16462730 | 16462779 | CSAR_peak_ | 6.85          | + |
| chr2 | 16475444 | 16475491 | CSAR_peak_ | 6.21          | + |
| chr2 | 16475652 | 16475732 | CSAR_peak_ | 9.58          | + |
| chr2 | 16508065 | 16508112 | CSAR_peak_ | 10.83         | + |
| chr2 | 16508858 | 16508891 | CSAR_peak_ | 6.57          | + |
| chr2 | 16509326 | 16509425 | CSAR_peak_ | 6.03,6.95     | + |
| chr2 | 16509455 | 16509503 | CSAR_peak_ | 8.65          | + |
| chr2 | 16509954 | 16510029 | CSAR_peak_ | 8.39          | + |
| chr2 | 16510225 | 16510267 | CSAR_peak_ | 6.21          | + |
| chr2 | 16510509 | 16510566 | CSAR_peak_ | 6.95          | + |
| chr2 | 16510650 | 16510699 | CSAR_peak_ | 7.92,6.21     | + |
| chr2 | 16510993 | 16511040 | CSAR_peak_ | 9.58          | + |
| chr2 | 16511102 | 16511184 | CSAR_peak_ | 21.94,8.39    | + |
| chr2 | 16511266 | 16511322 | CSAR_peak_ | 7.27          | + |
| chr2 | 16511391 | 16511450 | CSAR_peak_ | 8.28          | + |
| chr2 | 16512109 | 16512130 | CSAR_peak_ | 13.44         | + |
| chr2 | 16512252 | 16512273 | CSAR_peak_ | 11.28         | + |
| chr2 | 16512296 | 16512359 | CSAR_peak_ | 12.31,12.5    | + |
| chr2 | 16512450 | 16512499 | CSAR_peak_ | 10.83         | + |
| chr2 | 16512556 | 16512653 | CSAR_peak_ | 13.66         | + |
| chr2 | 16513048 | 16513111 | CSAR_peak_ | 16.33         | + |
| chr2 | 16513313 | 16513337 | CSAR_peak_ | 6.21          | + |
| chr2 | 16513612 | 16513688 | CSAR_peak_ | 17.82         | + |
| chr2 | 16513703 | 16513776 | CSAR_peak_ | 7.27          | + |
| chr2 | 16513854 | 16513935 | CSAR_peak_ | 9.58          | + |
| chr2 | 16513999 | 16514077 | CSAR_peak_ | 10.95,7.73    | + |
| chr2 | 16514357 | 16514445 | CSAR_peak_ | 10.95,8.65    | + |
| chr2 | 16514583 | 16514712 | CSAR_peak_ | 9.77,13.51,6. | + |
| chr2 | 16515159 | 16515317 | CSAR_peak_ | 16.33,12.6    | + |
| chr2 | 16515372 | 16515428 | CSAR_peak_ | 8.92          | + |
| chr2 | 16515494 | 16515787 | CSAR_peak_ | 7.26,17.68,1. | + |
| chr2 | 16515934 | 16515985 | CSAR_peak_ | 15.43         | + |
| chr2 | 16516613 | 16516664 | CSAR_peak_ | 6.21          | + |
| chr2 | 16516782 | 16516931 | CSAR_peak_ | 6.21,11.14    | + |
| chr2 | 16533222 | 16533257 | CSAR_peak_ | 6.21          | + |

|      |          |          |            |               |   |
|------|----------|----------|------------|---------------|---|
| chr2 | 16534494 | 16534535 | CSAR_peak_ | 7.27          | + |
| chr2 | 16593204 | 16593249 | CSAR_peak_ | 6.95          | + |
| chr2 | 16627397 | 16627410 | CSAR_peak_ | 7.27          | + |
| chr2 | 16627416 | 16627470 | CSAR_peak_ | 11.07         | + |
| chr2 | 16627491 | 16627542 | CSAR_peak_ | 7.34          | + |
| chr2 | 16627777 | 16627868 | CSAR_peak_ | 7.27          | + |
| chr2 | 16627963 | 16628005 | CSAR_peak_ | 7.27          | + |
| chr2 | 16628254 | 16628357 | CSAR_peak_ | 13.48         | + |
| chr2 | 16628626 | 16628683 | CSAR_peak_ | 8.39,8.39     | + |
| chr2 | 16629030 | 16629084 | CSAR_peak_ | 6.21,11.14    | + |
| chr2 | 16644731 | 16644771 | CSAR_peak_ | 9.61          | + |
| chr2 | 16644836 | 16644875 | CSAR_peak_ | 9.58          | + |
| chr2 | 16670657 | 16670713 | CSAR_peak_ | 12.31,11.38   | + |
| chr2 | 16670867 | 16670877 | CSAR_peak_ | 5.62          | + |
| chr2 | 16712125 | 16712193 | CSAR_peak_ | 12.13         | + |
| chr2 | 16749020 | 16749057 | CSAR_peak_ | 5.67          | + |
| chr2 | 16772514 | 16772549 | CSAR_peak_ | 6.21          | + |
| chr2 | 16773122 | 16773140 | CSAR_peak_ | 6.57          | + |
| chr2 | 16773396 | 16773459 | CSAR_peak_ | 8.39          | + |
| chr2 | 16774055 | 16774200 | CSAR_peak_ | 17.82,8.39    | + |
| chr2 | 16874443 | 16874530 | CSAR_peak_ | 8.39          | + |
| chr2 | 16874531 | 16874617 | CSAR_peak_ | 24.17,7.92    | + |
| chr2 | 16874809 | 16874868 | CSAR_peak_ | 5.62          | + |
| chr2 | 16913041 | 16913079 | CSAR_peak_ | 6.95          | + |
| chr2 | 16932577 | 16932631 | CSAR_peak_ | 6.21          | + |
| chr2 | 17057759 | 17057783 | CSAR_peak_ | 8.39          | + |
| chr2 | 17057818 | 17057894 | CSAR_peak_ | 6.95          | + |
| chr2 | 17058292 | 17058342 | CSAR_peak_ | 7.27          | + |
| chr2 | 17127171 | 17127300 | CSAR_peak_ | 7.27,7.92,5.6 | + |
| chr2 | 17127328 | 17127397 | CSAR_peak_ | 7.58,6.57     | + |
| chr2 | 17128414 | 17128491 | CSAR_peak_ | 6.95,8.65     | + |
| chr2 | 17138108 | 17138207 | CSAR_peak_ | 20.44,10.96   | + |
| chr2 | 17138213 | 17138355 | CSAR_peak_ | 13.44,27.61,  | + |
| chr2 | 17138447 | 17138574 | CSAR_peak_ | 16.11         | + |
| chr2 | 17138674 | 17138717 | CSAR_peak_ | 6.21          | + |
| chr2 | 17138810 | 17139044 | CSAR_peak_ | 15.43,9.77,7. | + |
| chr2 | 17139100 | 17139211 | CSAR_peak_ | 14.88,16.05   | + |
| chr2 | 17139256 | 17139294 | CSAR_peak_ | 9.79          | + |
| chr2 | 17140353 | 17140455 | CSAR_peak_ | 20.13,12.31   | + |
| chr2 | 17140478 | 17140516 | CSAR_peak_ | 10.83         | + |
| chr2 | 17140738 | 17140817 | CSAR_peak_ | 13.44,12.31   | + |
| chr2 | 17140925 | 17140972 | CSAR_peak_ | 6.1           | + |

|      |          |          |             |               |   |
|------|----------|----------|-------------|---------------|---|
| chr2 | 17141010 | 17141082 | CSAR_peak_  | 8.39,8.65     | + |
| chr2 | 17141111 | 17141151 | CSAR_peak_  | 6.95          | + |
| chr2 | 17178048 | 17178098 | CSAR_peak_  | 10.83         | + |
| chr2 | 17178159 | 17178206 | CSAR_peak_  | 6.21          | + |
| chr2 | 17178963 | 17179015 | CSAR_peak_  | 8.39          | + |
| chr2 | 17179438 | 17179487 | CSAR_peak_! | 7.58          | + |
| chr2 | 17180024 | 17180067 | CSAR_peak_! | 6.52          | + |
| chr2 | 17180425 | 17180490 | CSAR_peak_  | 9.58          | + |
| chr2 | 17180723 | 17180776 | CSAR_peak_  | 10.83         | + |
| chr2 | 17180866 | 17180959 | CSAR_peak_  | 9.58          | + |
| chr2 | 17181486 | 17181516 | CSAR_peak_! | 6.57          | + |
| chr2 | 17182840 | 17182879 | CSAR_peak_  | 6.21          | + |
| chr2 | 17183157 | 17183223 | CSAR_peak_  | 6.21          | + |
| chr2 | 17183238 | 17183287 | CSAR_peak_  | 7.92,6.03     | + |
| chr2 | 17183683 | 17183729 | CSAR_peak_  | 7.34          | + |
| chr2 | 17184223 | 17184246 | CSAR_peak_  | 8.95          | + |
| chr2 | 17186056 | 17186107 | CSAR_peak_! | 14.85,8.13,9. | + |
| chr2 | 17187204 | 17187261 | CSAR_peak_! | 7.58,8.52     | + |
| chr2 | 17187725 | 17187779 | CSAR_peak_  | 6.95,10.95    | + |
| chr2 | 17187884 | 17187938 | CSAR_peak_! | 13.51         | + |
| chr2 | 17188041 | 17188082 | CSAR_peak_  | 6.21          | + |
| chr2 | 17223513 | 17223560 | CSAR_peak_  | 6.21          | + |
| chr2 | 17224607 | 17224766 | CSAR_peak_  | 56.16,28.51,; | + |
| chr2 | 17269345 | 17269436 | CSAR_peak_  | 10.68,8.9     | + |
| chr2 | 17269477 | 17269552 | CSAR_peak_  | 12.94         | + |
| chr2 | 17269634 | 17269762 | CSAR_peak_  | 33.62,20.42,; | + |
| chr2 | 17269764 | 17269804 | CSAR_peak_  | 6.3,13.11     | + |
| chr2 | 17269888 | 17269946 | CSAR_peak_  | 27.17         | + |
| chr2 | 17269973 | 17270175 | CSAR_peak_  | 6.94,27.61,7. | + |
| chr2 | 17270274 | 17270315 | CSAR_peak_  | 7.7           | + |
| chr2 | 17270387 | 17270420 | CSAR_peak_  | 6.02          | + |
| chr2 | 17270477 | 17270539 | CSAR_peak_  | 14.22         | + |
| chr2 | 17271836 | 17271885 | CSAR_peak_! | 8.28          | + |
| chr2 | 17272132 | 17272168 | CSAR_peak_! | 5.62          | + |
| chr2 | 17272254 | 17272288 | CSAR_peak_  | 6.03          | + |
| chr2 | 17272546 | 17272596 | CSAR_peak_! | 11.14,6.03    | + |
| chr2 | 17273721 | 17273774 | CSAR_peak_! | 12.35,8.72    | + |
| chr2 | 17302440 | 17302489 | CSAR_peak_  | 9.77          | + |
| chr2 | 17360963 | 17361011 | CSAR_peak_  | 6.45          | + |
| chr2 | 17361206 | 17361255 | CSAR_peak_  | 6.02          | + |
| chr2 | 17361320 | 17361447 | CSAR_peak_  | 9.97          | + |
| chr2 | 17362075 | 17362081 | CSAR_peak_  | 6.57          | + |

|      |          |          |            |                |
|------|----------|----------|------------|----------------|
| chr2 | 17362147 | 17362326 | CSAR_peak_ | 6.05,18.73,7.+ |
| chr2 | 17363898 | 17363952 | CSAR_peak_ | 11.14,6.57 +   |
| chr2 | 17399672 | 17399739 | CSAR_peak_ | 8.39 +         |
| chr2 | 17490680 | 17490718 | CSAR_peak_ | 6.03 +         |
| chr2 | 17544576 | 17544623 | CSAR_peak_ | 14.88 +        |
| chr2 | 17544730 | 17544797 | CSAR_peak_ | 7.34 +         |
| chr2 | 17544832 | 17544916 | CSAR_peak_ | 7.58,8.95 +    |
| chr2 | 17578190 | 17578287 | CSAR_peak_ | 19.36,22.74,+  |
| chr2 | 17578609 | 17578628 | CSAR_peak_ | 5.62 +         |
| chr2 | 17583647 | 17583715 | CSAR_peak_ | 6.57,7.29 +    |
| chr2 | 17604389 | 17604439 | CSAR_peak_ | 6.21,6.21 +    |
| chr2 | 17604562 | 17604637 | CSAR_peak_ | 7.58 +         |
| chr2 | 17604902 | 17605171 | CSAR_peak_ | 18.73,18.73,+  |
| chr2 | 17605178 | 17605297 | CSAR_peak_ | 10.83,12.13 +  |
| chr2 | 17605325 | 17605443 | CSAR_peak_ | 7.27,9.77,8.3+ |
| chr2 | 17605487 | 17605649 | CSAR_peak_ | 13.44,13.51 +  |
| chr2 | 17610531 | 17610601 | CSAR_peak_ | 6.03,9.72 +    |
| chr2 | 17628384 | 17628433 | CSAR_peak_ | 7.27 +         |
| chr2 | 17628575 | 17628625 | CSAR_peak_ | 6.57 +         |
| chr2 | 17629767 | 17629804 | CSAR_peak_ | 9.58 +         |
| chr2 | 17630218 | 17630281 | CSAR_peak_ | 7.27,8.95 +    |
| chr2 | 17630490 | 17630555 | CSAR_peak_ | 7.27,6.21 +    |
| chr2 | 17729405 | 17729435 | CSAR_peak_ | 9.61,6.52 +    |
| chr2 | 17729946 | 17730024 | CSAR_peak_ | 6.52 +         |
| chr2 | 17730454 | 17730480 | CSAR_peak_ | 6.95 +         |
| chr2 | 17730690 | 17730724 | CSAR_peak_ | 6.95 +         |
| chr2 | 17757285 | 17757310 | CSAR_peak_ | 6.03 +         |
| chr2 | 17758147 | 17758218 | CSAR_peak_ | 11.14,6.21 +   |
| chr2 | 17774947 | 17775008 | CSAR_peak_ | 9.77 +         |
| chr2 | 17793348 | 17793424 | CSAR_peak_ | 9.58 +         |
| chr2 | 17793931 | 17793965 | CSAR_peak_ | 10.95 +        |
| chr2 | 17794094 | 17794136 | CSAR_peak_ | 7.27 +         |
| chr2 | 17794241 | 17794252 | CSAR_peak_ | 8.39 +         |
| chr2 | 17794329 | 17794378 | CSAR_peak_ | 13.48 +        |
| chr2 | 17794390 | 17794450 | CSAR_peak_ | 7.71,6.1 +     |
| chr2 | 17794568 | 17794630 | CSAR_peak_ | 13.44,7.34,8.+ |
| chr2 | 17794684 | 17794804 | CSAR_peak_ | 7.58,7.92,7.9+ |
| chr2 | 17794971 | 17795006 | CSAR_peak_ | 7.92,5.62 +    |
| chr2 | 17795153 | 17795197 | CSAR_peak_ | 8.13,6.94 +    |
| chr2 | 17795247 | 17795347 | CSAR_peak_ | 9.61,7.18 +    |
| chr2 | 17851376 | 17851434 | CSAR_peak_ | 17.82,8.65,7.+ |
| chr2 | 17853175 | 17853218 | CSAR_peak_ | 8.39 +         |

|      |          |          |            |                   |   |
|------|----------|----------|------------|-------------------|---|
| chr2 | 17854150 | 17854200 | CSAR_peak_ | 6.21              | + |
| chr2 | 17855321 | 17855384 | CSAR_peak_ | 7.92              | + |
| chr2 | 17887052 | 17887068 | CSAR_peak_ | 6.95              | + |
| chr2 | 17887127 | 17887267 | CSAR_peak_ | 12.74,11.63       | + |
| chr2 | 17887504 | 17887624 | CSAR_peak_ | 13.48,14.85       | + |
| chr2 | 17887628 | 17887697 | CSAR_peak_ | 10.83,8.39        | + |
| chr2 | 17887712 | 17887728 | CSAR_peak_ | 5.95              | + |
| chr2 | 17887740 | 17887813 | CSAR_peak_ | 7.03,10.83        | + |
| chr2 | 17887856 | 17887986 | CSAR_peak_ | 6.03,11.75,11.75  | + |
| chr2 | 17888114 | 17888185 | CSAR_peak_ | 16.14,8.92,10.83  | + |
| chr2 | 17888315 | 17888381 | CSAR_peak_ | 21.74,12.14       | + |
| chr2 | 17888392 | 17888553 | CSAR_peak_ | 18.9,5.62,21.03   | + |
| chr2 | 17889014 | 17889054 | CSAR_peak_ | 6.57              | + |
| chr2 | 17891905 | 17891994 | CSAR_peak_ | 14.88,6.57,7.03   | + |
| chr2 | 17892370 | 17892473 | CSAR_peak_ | 14.76             | + |
| chr2 | 17892605 | 17892647 | CSAR_peak_ | 6.95,11.38        | + |
| chr2 | 17892800 | 17892857 | CSAR_peak_ | 7.58,8.39         | + |
| chr2 | 17892975 | 17893036 | CSAR_peak_ | 5.9,21.56,28.08   | + |
| chr2 | 17893150 | 17893178 | CSAR_peak_ | 12.74,11.99       | + |
| chr2 | 17893374 | 17893434 | CSAR_peak_ | 7.58,10.83        | + |
| chr2 | 17893515 | 17893542 | CSAR_peak_ | 6.21              | + |
| chr2 | 17909584 | 17909634 | CSAR_peak_ | 7.92              | + |
| chr2 | 17916313 | 17916365 | CSAR_peak_ | 6.57,6.02         | + |
| chr2 | 17916527 | 17916563 | CSAR_peak_ | 12.13             | + |
| chr2 | 17923079 | 17923162 | CSAR_peak_ | 48.68,14.31,11.75 | + |
| chr2 | 17923228 | 17923295 | CSAR_peak_ | 37.01,7.9,28.08   | + |
| chr2 | 17923396 | 17923459 | CSAR_peak_ | 28.08,21.03,11.75 | + |
| chr2 | 17923562 | 17923640 | CSAR_peak_ | 18.31,26.76       | + |
| chr2 | 17927437 | 17927489 | CSAR_peak_ | 6.21,6.21         | + |
| chr2 | 17928184 | 17928294 | CSAR_peak_ | 6.57,7.58,8.39    | + |
| chr2 | 17928382 | 17928473 | CSAR_peak_ | 10.83,10.83       | + |
| chr2 | 17948461 | 17948519 | CSAR_peak_ | 7.27              | + |
| chr2 | 17948827 | 17948939 | CSAR_peak_ | 21.26             | + |
| chr2 | 17949022 | 17949073 | CSAR_peak_ | 10.83             | + |
| chr2 | 17949313 | 17949344 | CSAR_peak_ | 6.57              | + |
| chr2 | 17949359 | 17949407 | CSAR_peak_ | 7.27              | + |
| chr2 | 17949482 | 17949524 | CSAR_peak_ | 6.21,6.95         | + |
| chr2 | 17949536 | 17949561 | CSAR_peak_ | 6.02,8.39         | + |
| chr2 | 17949660 | 17949752 | CSAR_peak_ | 19.36,6.44        | + |
| chr2 | 17949937 | 17950008 | CSAR_peak_ | 13.48,7.47,5.9    | + |
| chr2 | 17950275 | 17950296 | CSAR_peak_ | 7.36              | + |
| chr2 | 17950333 | 17950578 | CSAR_peak_ | 10.61,27.67,11.75 | + |

|      |          |          |            |                |
|------|----------|----------|------------|----------------|
| chr2 | 17950772 | 17950826 | CSAR_peak_ | 7.61 +         |
| chr2 | 17951054 | 17951100 | CSAR_peak_ | 6.95 +         |
| chr2 | 17951231 | 17951280 | CSAR_peak_ | 16.33,6.21 +   |
| chr2 | 17952648 | 17952691 | CSAR_peak_ | 7.27 +         |
| chr2 | 17952780 | 17952791 | CSAR_peak_ | 7.27 +         |
| chr2 | 17952847 | 17952870 | CSAR_peak_ | 6.45 +         |
| chr2 | 17961827 | 17961894 | CSAR_peak_ | 6.03 +         |
| chr2 | 18002721 | 18002812 | CSAR_peak_ | 8.39,9.77,6.2+ |
| chr2 | 18003045 | 18003087 | CSAR_peak_ | 6.21 +         |
| chr2 | 18021823 | 18021885 | CSAR_peak_ | 5.9 +          |
| chr2 | 18021948 | 18021994 | CSAR_peak_ | 9.97 +         |
| chr2 | 18022360 | 18022430 | CSAR_peak_ | 12.13,6.95,6.+ |
| chr2 | 18022508 | 18022555 | CSAR_peak_ | 18.61,13.44 +  |
| chr2 | 18022649 | 18022716 | CSAR_peak_ | 7.27,6.57 +    |
| chr2 | 18022967 | 18023050 | CSAR_peak_ | 10.31,6.03 +   |
| chr2 | 18023689 | 18023747 | CSAR_peak_ | 5.62,12.31 +   |
| chr2 | 18024050 | 18024100 | CSAR_peak_ | 7.27 +         |
| chr2 | 18024192 | 18024259 | CSAR_peak_ | 6.21 +         |
| chr2 | 18024778 | 18024845 | CSAR_peak_ | 8.39 +         |
| chr2 | 18024958 | 18025022 | CSAR_peak_ | 7.27 +         |
| chr2 | 18066239 | 18066277 | CSAR_peak_ | 7.27 +         |
| chr2 | 18071325 | 18071366 | CSAR_peak_ | 11.14,12.13 +  |
| chr2 | 18071412 | 18071498 | CSAR_peak_ | 17.82,6.57 +   |
| chr2 | 18071558 | 18071645 | CSAR_peak_ | 8.39,6.21 +    |
| chr2 | 18121930 | 18121960 | CSAR_peak_ | 6.21 +         |
| chr2 | 18139002 | 18139052 | CSAR_peak_ | 6.44 +         |
| chr2 | 18140281 | 18140333 | CSAR_peak_ | 10.83 +        |
| chr2 | 18227588 | 18227720 | CSAR_peak_ | 8.39 +         |
| chr2 | 18227842 | 18227891 | CSAR_peak_ | 6.95 +         |
| chr2 | 18237293 | 18237342 | CSAR_peak_ | 8.95 +         |
| chr2 | 18237488 | 18237587 | CSAR_peak_ | 10.83,8.39 +   |
| chr2 | 18237778 | 18237844 | CSAR_peak_ | 10.31,8.39 +   |
| chr2 | 18237863 | 18237917 | CSAR_peak_ | 10.95 +        |
| chr2 | 18238333 | 18238378 | CSAR_peak_ | 7.27 +         |
| chr2 | 18238480 | 18238522 | CSAR_peak_ | 7.27 +         |
| chr2 | 18242925 | 18243033 | CSAR_peak_ | 6.85,6.21 +    |
| chr2 | 18254195 | 18254251 | CSAR_peak_ | 6.21 +         |
| chr2 | 18254562 | 18254599 | CSAR_peak_ | 6.21 +         |
| chr2 | 18254678 | 18254713 | CSAR_peak_ | 6.21 +         |
| chr2 | 18260973 | 18261010 | CSAR_peak_ | 6.21 +         |
| chr2 | 18276345 | 18276399 | CSAR_peak_ | 7.73 +         |
| chr2 | 18277411 | 18277598 | CSAR_peak_ | 6.21,6.57,11.+ |

|      |          |          |            |                |
|------|----------|----------|------------|----------------|
| chr2 | 18277667 | 18277776 | CSAR_peak_ | 14.88,9.58,5.+ |
| chr2 | 18277861 | 18277953 | CSAR_peak_ | 6.57,29.4,6.0+ |
| chr2 | 18277979 | 18278051 | CSAR_peak_ | 9.97 +         |
| chr2 | 18278093 | 18278121 | CSAR_peak_ | 6.03 +         |
| chr2 | 18278510 | 18278557 | CSAR_peak_ | 7.27 +         |
| chr2 | 18316825 | 18316888 | CSAR_peak_ | 13.48 +        |
| chr2 | 18317034 | 18317053 | CSAR_peak_ | 6.45 +         |
| chr2 | 18317825 | 18317889 | CSAR_peak_ | 7.31,7.9,10.1+ |
| chr2 | 18319333 | 18319356 | CSAR_peak_ | 8.39 +         |
| chr2 | 18319939 | 18319979 | CSAR_peak_ | 7.27 +         |
| chr2 | 18320126 | 18320200 | CSAR_peak_ | 6.21 +         |
| chr2 | 18331271 | 18331367 | CSAR_peak_ | 9.58 +         |
| chr2 | 18334204 | 18334362 | CSAR_peak_ | 12.5,8.39 +    |
| chr2 | 18334656 | 18334706 | CSAR_peak_ | 6.03 +         |
| chr2 | 18342647 | 18342670 | CSAR_peak_ | 7.27 +         |
| chr2 | 18342680 | 18342722 | CSAR_peak_ | 7.27,8.39 +    |
| chr2 | 18364839 | 18364893 | CSAR_peak_ | 16.33,19.96 +  |
| chr2 | 18364982 | 18364993 | CSAR_peak_ | 6.57 +         |
| chr2 | 18365245 | 18365291 | CSAR_peak_ | 10.31,21.35 +  |
| chr2 | 18365337 | 18365431 | CSAR_peak_ | 12.13,18.55 +  |
| chr2 | 18365435 | 18365469 | CSAR_peak_ | 5.62 +         |
| chr2 | 18365520 | 18365592 | CSAR_peak_ | 6.85 +         |
| chr2 | 18365676 | 18365730 | CSAR_peak_ | 17.87,18.73 +  |
| chr2 | 18365735 | 18365824 | CSAR_peak_ | 8.39,6.44,6.2+ |
| chr2 | 18365838 | 18365903 | CSAR_peak_ | 7.08 +         |
| chr2 | 18365920 | 18365948 | CSAR_peak_ | 7.06 +         |
| chr2 | 18365983 | 18366022 | CSAR_peak_ | 8.39 +         |
| chr2 | 18366030 | 18366052 | CSAR_peak_ | 14.76 +        |
| chr2 | 18366141 | 18366262 | CSAR_peak_ | 15.2,10.7,11.+ |
| chr2 | 18366307 | 18366502 | CSAR_peak_ | 12.15,14.85,+  |
| chr2 | 18366600 | 18366686 | CSAR_peak_ | 21.94,14.76 +  |
| chr2 | 18366779 | 18366835 | CSAR_peak_ | 7.27,7.58 +    |
| chr2 | 18366886 | 18366972 | CSAR_peak_ | 11.38 +        |
| chr2 | 18366993 | 18367054 | CSAR_peak_ | 9.27,10.83 +   |
| chr2 | 18367241 | 18367339 | CSAR_peak_ | 10.62 +        |
| chr2 | 18367435 | 18367484 | CSAR_peak_ | 6.87 +         |
| chr2 | 18367538 | 18367580 | CSAR_peak_ | 9.58 +         |
| chr2 | 18374802 | 18374905 | CSAR_peak_ | 16.33,11.38 +  |
| chr2 | 18375214 | 18375262 | CSAR_peak_ | 6.21 +         |
| chr2 | 18375694 | 18375744 | CSAR_peak_ | 8.39 +         |
| chr2 | 18376275 | 18376362 | CSAR_peak_ | 6.03,7.61 +    |
| chr2 | 18376385 | 18376490 | CSAR_peak_ | 8.65,10.02 +   |

|      |          |          |            |                  |   |
|------|----------|----------|------------|------------------|---|
| chr2 | 18382462 | 18382524 | CSAR_peak_ | 10.83            | + |
| chr2 | 18425355 | 18425389 | CSAR_peak_ | 7.27             | + |
| chr2 | 18425502 | 18425517 | CSAR_peak_ | 7.27             | + |
| chr2 | 18433139 | 18433182 | CSAR_peak_ | 7.27             | + |
| chr2 | 18433635 | 18433747 | CSAR_peak_ | 10.95,10.02      | + |
| chr2 | 18436388 | 18436446 | CSAR_peak_ | 6.57,6.95        | + |
| chr2 | 18568083 | 18568132 | CSAR_peak_ | 9.58             | + |
| chr2 | 18611826 | 18611876 | CSAR_peak_ | 8.39             | + |
| chr2 | 18613080 | 18613159 | CSAR_peak_ | 9.58             | + |
| chr2 | 18624707 | 18624763 | CSAR_peak_ | 5.62,7.34        | + |
| chr2 | 18625127 | 18625147 | CSAR_peak_ | 6.21             | + |
| chr2 | 18657256 | 18657299 | CSAR_peak_ | 6.21             | + |
| chr2 | 18686681 | 18686712 | CSAR_peak_ | 6.03,6.21        | + |
| chr2 | 18686776 | 18686841 | CSAR_peak_ | 10.83            | + |
| chr2 | 18793977 | 18794027 | CSAR_peak_ | 5.62             | + |
| chr2 | 18795469 | 18795529 | CSAR_peak_ | 5.62,6.03        | + |
| chr2 | 18840461 | 18840530 | CSAR_peak_ | 8.92             | + |
| chr2 | 18840662 | 18840706 | CSAR_peak_ | 6.03             | + |
| chr2 | 18852472 | 18852514 | CSAR_peak_ | 5.62             | + |
| chr2 | 18860300 | 18860361 | CSAR_peak_ | 8.95,12.13       | + |
| chr2 | 18860448 | 18860475 | CSAR_peak_ | 6.03             | + |
| chr2 | 18862092 | 18862155 | CSAR_peak_ | 13.47,8.5        | + |
| chr2 | 18862240 | 18862356 | CSAR_peak_ | 8.12,9.58        | + |
| chr2 | 18895170 | 18895250 | CSAR_peak_ | 8.28,6.45        | + |
| chr2 | 18895890 | 18895949 | CSAR_peak_ | 6.95             | + |
| chr2 | 18896130 | 18896183 | CSAR_peak_ | 7.27             | + |
| chr2 | 18896488 | 18896522 | CSAR_peak_ | 6.21             | + |
| chr2 | 18896636 | 18896704 | CSAR_peak_ | 6.85,6.57        | + |
| chr2 | 18896877 | 18896924 | CSAR_peak_ | 6.21             | + |
| chr2 | 18899230 | 18899296 | CSAR_peak_ | 6.95             | + |
| chr2 | 18899334 | 18899411 | CSAR_peak_ | 11.66,13.44      | + |
| chr2 | 18899522 | 18899585 | CSAR_peak_ | 8.39,6.02        | + |
| chr2 | 18899663 | 18899681 | CSAR_peak_ | 8.39             | + |
| chr2 | 18899734 | 18899777 | CSAR_peak_ | 7.27             | + |
| chr2 | 18900255 | 18900319 | CSAR_peak_ | 13.48            | + |
| chr2 | 18900556 | 18900711 | CSAR_peak_ | 10.83            | + |
| chr2 | 18910488 | 18910544 | CSAR_peak_ | 7.68             | + |
| chr2 | 18910555 | 18910593 | CSAR_peak_ | 9.58             | + |
| chr2 | 18911059 | 18911241 | CSAR_peak_ | 6.95,17.51,11.66 | + |
| chr2 | 18911395 | 18911434 | CSAR_peak_ | 6.37             | + |
| chr2 | 18911438 | 18911518 | CSAR_peak_ | 17.82            | + |
| chr2 | 18911608 | 18911642 | CSAR_peak_ | 9.97             | + |



|      |          |          |            |                |   |
|------|----------|----------|------------|----------------|---|
| chr2 | 18911751 | 18911791 | CSAR_peak_ | 9.58           | + |
| chr2 | 18919897 | 18919909 | CSAR_peak_ | 7.27           | + |
| chr2 | 18920143 | 18920174 | CSAR_peak_ | 6.74           | + |
| chr2 | 18920279 | 18920288 | CSAR_peak_ | 6.21           | + |
| chr2 | 18920490 | 18920532 | CSAR_peak_ | 7.27           | + |
| chr2 | 18920929 | 18920951 | CSAR_peak_ | 6.21           | + |
| chr2 | 18924953 | 18925011 | CSAR_peak_ | 6.57           | + |
| chr2 | 18926255 | 18926306 | CSAR_peak_ | 8.39           | + |
| chr2 | 18926651 | 18926709 | CSAR_peak_ | 9.27           | + |
| chr2 | 18926904 | 18926950 | CSAR_peak_ | 7.27           | + |
| chr2 | 18927035 | 18927070 | CSAR_peak_ | 6.21           | + |
| chr2 | 18927165 | 18927252 | CSAR_peak_ | 11.63          | + |
| chr2 | 18927406 | 18927456 | CSAR_peak_ | 10.83          | + |
| chr2 | 18927766 | 18927825 | CSAR_peak_ | 8.39           | + |
| chr2 | 18928000 | 18928068 | CSAR_peak_ | 6.45           | + |
| chr2 | 18929255 | 18929280 | CSAR_peak_ | 10.31          | + |
| chr2 | 18929383 | 18929449 | CSAR_peak_ | 6.85           | + |
| chr2 | 18929513 | 18929592 | CSAR_peak_ | 6.45           | + |
| chr2 | 18929649 | 18929730 | CSAR_peak_ | 8.39,7.58      | + |
| chr2 | 18929804 | 18929879 | CSAR_peak_ | 10.83          | + |
| chr2 | 18930073 | 18930117 | CSAR_peak_ | 6.21           | + |
| chr2 | 18930277 | 18930361 | CSAR_peak_ | 7.34           | + |
| chr2 | 18930438 | 18930509 | CSAR_peak_ | 7.27           | + |
| chr2 | 18931470 | 18931516 | CSAR_peak_ | 10.83          | + |
| chr2 | 18953409 | 18953459 | CSAR_peak_ | 9.58           | + |
| chr2 | 18953852 | 18953902 | CSAR_peak_ | 8.95           | + |
| chr2 | 18954209 | 18954261 | CSAR_peak_ | 14.76          | + |
| chr2 | 18954321 | 18954386 | CSAR_peak_ | 10.95          | + |
| chr2 | 18965557 | 18965592 | CSAR_peak_ | 6.21           | + |
| chr2 | 18973412 | 18973439 | CSAR_peak_ | 37.84,16.76    | + |
| chr2 | 18973474 | 18973555 | CSAR_peak_ | 8.1,16.59      | + |
| chr2 | 18973556 | 18973630 | CSAR_peak_ | 34.18,45.18    | + |
| chr2 | 18973707 | 18973882 | CSAR_peak_ | 22.97,12.32,   | + |
| chr2 | 18973885 | 18974032 | CSAR_peak_ | 7.2,211.16,1(+ |   |
| chr2 | 18974210 | 18974343 | CSAR_peak_ | 65.12,84.08    | + |
| chr2 | 18980323 | 18980411 | CSAR_peak_ | 8.39           | + |
| chr2 | 19001745 | 19001800 | CSAR_peak_ | 13.29          | + |
| chr2 | 19001803 | 19001832 | CSAR_peak_ | 6.57           | + |
| chr2 | 19001926 | 19001969 | CSAR_peak_ | 14.76,8.39     | + |
| chr2 | 19002337 | 19002400 | CSAR_peak_ | 14.76,19.96,   | + |
| chr2 | 19002501 | 19002637 | CSAR_peak_ | 17.82,13.48    | + |
| chr2 | 19002777 | 19002837 | CSAR_peak_ | 9.77           | + |

|      |          |          |            |               |   |
|------|----------|----------|------------|---------------|---|
| chr2 | 19036168 | 19036223 | CSAR_peak_ | 12.13         | + |
| chr2 | 19065799 | 19065874 | CSAR_peak_ | 14.88,10.83   | + |
| chr2 | 19151829 | 19151885 | CSAR_peak_ | 8.95          | + |
| chr2 | 19151989 | 19152054 | CSAR_peak_ | 6.21          | + |
| chr2 | 19192184 | 19192230 | CSAR_peak_ | 6.21          | + |
| chr2 | 19193659 | 19193699 | CSAR_peak_ | 6.21          | + |
| chr2 | 19232868 | 19232919 | CSAR_peak_ | 7.58          | + |
| chr2 | 19233279 | 19233330 | CSAR_peak_ | 7.58          | + |
| chr2 | 19233480 | 19233565 | CSAR_peak_ | 9.43,29.4     | + |
| chr2 | 19233580 | 19233630 | CSAR_peak_ | 6.57          | + |
| chr2 | 19233684 | 19233758 | CSAR_peak_ | 14.88,6.95,1  | + |
| chr2 | 19233907 | 19233963 | CSAR_peak_ | 13.6,17.52    | + |
| chr2 | 19234091 | 19234190 | CSAR_peak_ | 6.21,6.57     | + |
| chr2 | 19234303 | 19234438 | CSAR_peak_ | 13.44,10.95,  | + |
| chr2 | 19234575 | 19234690 | CSAR_peak_ | 10.31         | + |
| chr2 | 19238157 | 19238231 | CSAR_peak_ | 7.27          | + |
| chr2 | 19244048 | 19244098 | CSAR_peak_ | 11.38         | + |
| chr2 | 19245968 | 19246038 | CSAR_peak_ | 8.19,16.54    | + |
| chr2 | 19246080 | 19246146 | CSAR_peak_ | 6.57,9.76     | + |
| chr2 | 19246185 | 19246235 | CSAR_peak_ | 12.35,10.92   | + |
| chr2 | 19246323 | 19246363 | CSAR_peak_ | 6.21          | + |
| chr2 | 19246937 | 19247009 | CSAR_peak_ | 6.95          | + |
| chr2 | 19247028 | 19247058 | CSAR_peak_ | 10.95         | + |
| chr2 | 19247904 | 19247957 | CSAR_peak_ | 8.39          | + |
| chr2 | 19248212 | 19248289 | CSAR_peak_ | 11.14,19.36   | + |
| chr2 | 19248540 | 19248596 | CSAR_peak_ | 7.27          | + |
| chr2 | 19272527 | 19272579 | CSAR_peak_ | 6.44          | + |
| chr2 | 19338471 | 19338515 | CSAR_peak_ | 6.21          | + |
| chr2 | 19339124 | 19339159 | CSAR_peak_ | 7.27          | + |
| chr2 | 19367531 | 19367577 | CSAR_peak_ | 9.58          | + |
| chr2 | 19367691 | 19367826 | CSAR_peak_ | 58.04,52.33   | + |
| chr2 | 19368195 | 19368231 | CSAR_peak_ | 6.44          | + |
| chr2 | 19380074 | 19380133 | CSAR_peak_ | 6.21          | + |
| chr2 | 19428053 | 19428097 | CSAR_peak_ | 9.58          | + |
| chr2 | 19428433 | 19428494 | CSAR_peak_ | 7.27          | + |
| chr2 | 19447104 | 19447152 | CSAR_peak_ | 8.34          | + |
| chr2 | 19449788 | 19449827 | CSAR_peak_ | 6.21          | + |
| chr2 | 19450460 | 19450499 | CSAR_peak_ | 6.21          | + |
| chr2 | 19451539 | 19451640 | CSAR_peak_ | 6.52          | + |
| chr2 | 19451753 | 19451857 | CSAR_peak_ | 6.87,10.33,6. | + |
| chr2 | 19451952 | 19452030 | CSAR_peak_ | 7.27          | + |
| chr2 | 19452119 | 19452183 | CSAR_peak_ | 9.77,5.79     | + |

|      |          |          |            |               |   |
|------|----------|----------|------------|---------------|---|
| chr2 | 19452426 | 19452435 | CSAR_peak_ | 6.21          | + |
| chr2 | 19453462 | 19453513 | CSAR_peak_ | 11.38         | + |
| chr2 | 19453958 | 19454041 | CSAR_peak_ | 16.08         | + |
| chr2 | 19454432 | 19454519 | CSAR_peak_ | 7.27,8.65     | + |
| chr2 | 19473590 | 19473648 | CSAR_peak_ | 8.28          | + |
| chr2 | 19473702 | 19473749 | CSAR_peak_ | 7.73          | + |
| chr2 | 19482246 | 19482289 | CSAR_peak_ | 10.83         | + |
| chr2 | 19499169 | 19499210 | CSAR_peak_ | 8.13,5.62     | + |
| chr2 | 19500177 | 19500204 | CSAR_peak_ | 8.39          | + |
| chr2 | 19500222 | 19500228 | CSAR_peak_ | 6.21          | + |
| chr2 | 19500871 | 19500910 | CSAR_peak_ | 6.21          | + |
| chr2 | 19501934 | 19502000 | CSAR_peak_ | 6.03          | + |
| chr2 | 19529813 | 19529857 | CSAR_peak_ | 9.58,8.39     | + |
| chr2 | 19558627 | 19558658 | CSAR_peak_ | 6.57          | + |
| chr2 | 19609102 | 19609146 | CSAR_peak_ | 8.39          | + |
| chr2 | 19609322 | 19609488 | CSAR_peak_ | 7.27,6.03,9.0 | + |
| chr2 | 19626462 | 19626528 | CSAR_peak_ | 8.39          | + |
| chr2 | 19627287 | 19627365 | CSAR_peak_ | 7.34          | + |
| chr2 | 19628305 | 19628327 | CSAR_peak_ | 7.27          | + |
| chr2 | 19628849 | 19628889 | CSAR_peak_ | 7.27,7.27     | + |
| chr2 | 19629435 | 19629574 | CSAR_peak_ | 10.83         | + |
| chr2 | 19630315 | 19630371 | CSAR_peak_ | 8.39          | + |
| chr2 | 19631417 | 19631473 | CSAR_peak_ | 6.03          | + |
| chr2 | 19632555 | 19632608 | CSAR_peak_ | 7.58          | + |
| chr2 | 19633228 | 19633278 | CSAR_peak_ | 6.57          | + |
| chr2 | 19633693 | 19633733 | CSAR_peak_ | 12.31,5.62    | + |
| chr2 | 19635159 | 19635201 | CSAR_peak_ | 6.44          | + |
| chr2 | 19636410 | 19636457 | CSAR_peak_ | 9.27          | + |
| chr2 | 19636627 | 19636675 | CSAR_peak_ | 6.57          | + |
| chr2 | 19636730 | 19636801 | CSAR_peak_ | 10.94         | + |
| chr2 | 19644827 | 19644891 | CSAR_peak_ | 10.7,7.27     | + |
| chr2 | 19644988 | 19645034 | CSAR_peak_ | 11.14,6.03    | + |
| chr2 | 19645119 | 19645131 | CSAR_peak_ | 6.71          | + |
| chr2 | 19645706 | 19645793 | CSAR_peak_ | 20.13,21.94   | + |
| chr2 | 19645898 | 19645942 | CSAR_peak_ | 7.27          | + |
| chr2 | 19646627 | 19646706 | CSAR_peak_ | 10.95         | + |
| chr2 | 19646797 | 19646846 | CSAR_peak_ | 6.85          | + |
| chr2 | 19680449 | 19680505 | CSAR_peak_ | 10.83         | + |
| chr2 | 19681866 | 19681930 | CSAR_peak_ | 6.57,7.92     | + |
| chr2 | 73833    | 73951    | CSAR_peak_ | 25.91         | - |
| chr2 | 74084    | 74155    | CSAR_peak_ | 9.58          | - |
| chr2 | 75195    | 75215    | CSAR_peak_ | 6.21          | - |

|      |        |                    |                |
|------|--------|--------------------|----------------|
| chr2 | 88311  | 88355 CSAR_peak_!  | 6.21 -         |
| chr2 | 88465  | 88516 CSAR_peak_!  | 12.13,7.27 -   |
| chr2 | 88940  | 89081 CSAR_peak_!  | 5.86,16.11,1(- |
| chr2 | 89206  | 89264 CSAR_peak_!  | 5.79,7.27 -    |
| chr2 | 89449  | 89566 CSAR_peak_!  | 7.34,6.21,9.5- |
| chr2 | 89649  | 89680 CSAR_peak_!  | 8.39 -         |
| chr2 | 89698  | 89802 CSAR_peak_!  | 9.77,7.27 -    |
| chr2 | 90899  | 90969 CSAR_peak_!  | 15.2,14.76 -   |
| chr2 | 91102  | 91114 CSAR_peak_!  | 6.21 -         |
| chr2 | 91956  | 92045 CSAR_peak_!  | 7.58,10.83 -   |
| chr2 | 92285  | 92330 CSAR_peak_!  | 19.36 -        |
| chr2 | 92404  | 92492 CSAR_peak_!  | 24.21,19.96 -  |
| chr2 | 92930  | 93012 CSAR_peak_!  | 14.88,9.58 -   |
| chr2 | 93241  | 93330 CSAR_peak_!  | 10.83 -        |
| chr2 | 93350  | 93403 CSAR_peak_!  | 13.48 -        |
| chr2 | 93485  | 93535 CSAR_peak_!  | 6.21 -         |
| chr2 | 93586  | 93655 CSAR_peak_!  | 7.27 -         |
| chr2 | 93709  | 93754 CSAR_peak_!  | 7.27,9.58 -    |
| chr2 | 93796  | 93892 CSAR_peak_!  | 14.88 -        |
| chr2 | 94029  | 94071 CSAR_peak_!  | 7.27 -         |
| chr2 | 94195  | 94248 CSAR_peak_!  | 6.21 -         |
| chr2 | 95129  | 95165 CSAR_peak_!  | 7.27 -         |
| chr2 | 102658 | 102732 CSAR_peak_! | 10.83 -        |
| chr2 | 103052 | 103107 CSAR_peak_! | 7.27 -         |
| chr2 | 103229 | 103338 CSAR_peak_! | 24.21,8.94,6.- |
| chr2 | 104165 | 104235 CSAR_peak_! | 14.88 -        |
| chr2 | 105615 | 105680 CSAR_peak_! | 7.27 -         |
| chr2 | 105709 | 105761 CSAR_peak_! | 9.58 -         |
| chr2 | 106113 | 106166 CSAR_peak_! | 12.17 -        |
| chr2 | 107081 | 107135 CSAR_peak_! | 7.27,7.27 -    |
| chr2 | 108095 | 108212 CSAR_peak_! | 12.59,7.58,6.- |
| chr2 | 134137 | 134176 CSAR_peak_! | 10.02 -        |
| chr2 | 134256 | 134274 CSAR_peak_! | 8.65 -         |
| chr2 | 134359 | 134388 CSAR_peak_! | 9.77,12.31 -   |
| chr2 | 136754 | 136852 CSAR_peak_! | 6.21 -         |
| chr2 | 149257 | 149319 CSAR_peak_! | 6.87,10.95 -   |
| chr2 | 149342 | 149370 CSAR_peak_! | 6.44 -         |
| chr2 | 150423 | 150495 CSAR_peak_! | 9.58 -         |
| chr2 | 151455 | 151606 CSAR_peak_! | 13.51,9.58,2!- |
| chr2 | 154753 | 154818 CSAR_peak_! | 7.27 -         |
| chr2 | 159827 | 159883 CSAR_peak_! | 12.13 -        |
| chr2 | 165344 | 165429 CSAR_peak_! | 9.58 -         |

|      |        |        |             |               |   |
|------|--------|--------|-------------|---------------|---|
| chr2 | 165512 | 165580 | CSAR_peak_  | 10.83,9.61    | - |
| chr2 | 165652 | 165775 | CSAR_peak_! | 12.74,12.59,! | - |
| chr2 | 165915 | 165971 | CSAR_peak_! | 6.87,17.82,1! | - |
| chr2 | 166200 | 166261 | CSAR_peak_! | 10.02         | - |
| chr2 | 166491 | 166594 | CSAR_peak_! | 9.58          | - |
| chr2 | 166728 | 166899 | CSAR_peak_! | 9.77,14.88,7. | - |
| chr2 | 167006 | 167067 | CSAR_peak_! | 7.92          | - |
| chr2 | 182017 | 182096 | CSAR_peak_! | 10.31,17.82   | - |
| chr2 | 195660 | 195711 | CSAR_peak_! | 8.39          | - |
| chr2 | 200106 | 200156 | CSAR_peak_! | 19.36         | - |
| chr2 | 200255 | 200309 | CSAR_peak_! | 13.48,12.13   | - |
| chr2 | 200411 | 200549 | CSAR_peak_! | 17.82,13.6,9! | - |
| chr2 | 200622 | 200695 | CSAR_peak_! | 33.47,7.89    | - |
| chr2 | 200794 | 200831 | CSAR_peak_! | 6.87          | - |
| chr2 | 200948 | 201053 | CSAR_peak_! | 37.91,19.29   | - |
| chr2 | 201061 | 201145 | CSAR_peak_! | 12.74,8.65    | - |
| chr2 | 201185 | 201198 | CSAR_peak_! | 6.03          | - |
| chr2 | 201216 | 201263 | CSAR_peak_! | 15.68,7.27    | - |
| chr2 | 201361 | 201495 | CSAR_peak_! | 18.65,13.84,! | - |
| chr2 | 201605 | 201640 | CSAR_peak_! | 7.27          | - |
| chr2 | 201852 | 202084 | CSAR_peak_! | 22.56,12.74,! | - |
| chr2 | 213225 | 213310 | CSAR_peak_! | 7.58,12.13    | - |
| chr2 | 213642 | 213683 | CSAR_peak_! | 8.28          | - |
| chr2 | 213756 | 213784 | CSAR_peak_! | 7.27          | - |
| chr2 | 255494 | 255598 | CSAR_peak_! | 14.76,13.48   | - |
| chr2 | 255770 | 255840 | CSAR_peak_! | 14.88,14.88   | - |
| chr2 | 255974 | 256068 | CSAR_peak_! | 17.82         | - |
| chr2 | 256735 | 256794 | CSAR_peak_! | 12.13         | - |
| chr2 | 257197 | 257240 | CSAR_peak_! | 9.58          | - |
| chr2 | 295683 | 295735 | CSAR_peak_! | 7.27          | - |
| chr2 | 296414 | 296493 | CSAR_peak_! | 12.94,14.76   | - |
| chr2 | 296565 | 296614 | CSAR_peak_! | 8.39          | - |
| chr2 | 296687 | 296751 | CSAR_peak_! | 10.52,24.33   | - |
| chr2 | 296823 | 297253 | CSAR_peak_! | 32.94,13.76,! | - |
| chr2 | 297297 | 297492 | CSAR_peak_! | 5.86,24.24,3! | - |
| chr2 | 297526 | 297632 | CSAR_peak_! | 16.34,19.98   | - |
| chr2 | 297694 | 297841 | CSAR_peak_! | 50.34,58.25,! | - |
| chr2 | 297913 | 298019 | CSAR_peak_! | 13.29         | - |
| chr2 | 309255 | 309309 | CSAR_peak_! | 6.87          | - |
| chr2 | 309495 | 309604 | CSAR_peak_! | 7.27,13.92    | - |
| chr2 | 309606 | 309760 | CSAR_peak_! | 6.94,9.58     | - |
| chr2 | 310578 | 310700 | CSAR_peak_! | 14.85         | - |

|      |        |        |             |                  |   |
|------|--------|--------|-------------|------------------|---|
| chr2 | 310851 | 310888 | CSAR_peak_! | 14.88            | - |
| chr2 | 311007 | 311073 | CSAR_peak_! | 9.58,12.13       | - |
| chr2 | 311164 | 311246 | CSAR_peak_! | 17.82,5.86,2.13  | - |
| chr2 | 311332 | 311424 | CSAR_peak_! | 9.77,8.39        | - |
| chr2 | 311783 | 311827 | CSAR_peak_! | 12.6             | - |
| chr2 | 312413 | 312450 | CSAR_peak_! | 9.58,8.39        | - |
| chr2 | 312533 | 312606 | CSAR_peak_! | 12.13,12.13      | - |
| chr2 | 312750 | 312795 | CSAR_peak_! | 7.27             | - |
| chr2 | 358933 | 358983 | CSAR_peak_! | 6.21             | - |
| chr2 | 366207 | 366248 | CSAR_peak_! | 7.27             | - |
| chr2 | 397055 | 397104 | CSAR_peak_! | 10.83            | - |
| chr2 | 397194 | 397232 | CSAR_peak_! | 10.31            | - |
| chr2 | 397289 | 397357 | CSAR_peak_! | 13.48,9.77       | - |
| chr2 | 397446 | 397494 | CSAR_peak_! | 9.77             | - |
| chr2 | 397773 | 397856 | CSAR_peak_! | 12.31,11.74      | - |
| chr2 | 397923 | 397972 | CSAR_peak_! | 8.39             | - |
| chr2 | 427382 | 427443 | CSAR_peak_! | 7.27,6.21        | - |
| chr2 | 427494 | 427538 | CSAR_peak_! | 10.02            | - |
| chr2 | 427745 | 427826 | CSAR_peak_! | 9.58             | - |
| chr2 | 428161 | 428214 | CSAR_peak_! | 12.13,7.27       | - |
| chr2 | 518438 | 518469 | CSAR_peak_! | 6.21             | - |
| chr2 | 520296 | 520406 | CSAR_peak_! | 14.88            | - |
| chr2 | 520977 | 521017 | CSAR_peak_! | 10.83            | - |
| chr2 | 553453 | 553534 | CSAR_peak_! | 8.14             | - |
| chr2 | 553570 | 553603 | CSAR_peak_! | 7.27             | - |
| chr2 | 553681 | 553814 | CSAR_peak_! | 24.52,9.58       | - |
| chr2 | 554022 | 554072 | CSAR_peak_! | 6.21             | - |
| chr2 | 554141 | 554244 | CSAR_peak_! | 9.58             | - |
| chr2 | 554284 | 554380 | CSAR_peak_! | 14.76,19.98,1.13 | - |
| chr2 | 554386 | 554417 | CSAR_peak_! | 10.31,7.58       | - |
| chr2 | 554508 | 554571 | CSAR_peak_! | 9.58             | - |
| chr2 | 554578 | 554651 | CSAR_peak_! | 9.58,9.58        | - |
| chr2 | 554826 | 554876 | CSAR_peak_! | 9.58             | - |
| chr2 | 555299 | 555388 | CSAR_peak_! | 18.85,10.99      | - |
| chr2 | 558581 | 558628 | CSAR_peak_! | 8.39             | - |
| chr2 | 619070 | 619123 | CSAR_peak_! | 6.21             | - |
| chr2 | 698332 | 698427 | CSAR_peak_! | 6.72,24.21       | - |
| chr2 | 698548 | 698729 | CSAR_peak_! | 25.73,31.2       | - |
| chr2 | 698752 | 698850 | CSAR_peak_! | 6.81,66.05,1.13  | - |
| chr2 | 698919 | 698980 | CSAR_peak_! | 12.31,9.58       | - |
| chr2 | 699052 | 699111 | CSAR_peak_! | 10.94,7.27       | - |
| chr2 | 699259 | 699321 | CSAR_peak_! | 9.58             | - |

|      |        |        |             |                |   |
|------|--------|--------|-------------|----------------|---|
| chr2 | 699531 | 699589 | CSAR_peak_! | 15.2,8.61      | - |
| chr2 | 699840 | 699894 | CSAR_peak_! | 7.27,9.58      | - |
| chr2 | 700228 | 700330 | CSAR_peak_! | 8.58,7.17,15.  | - |
| chr2 | 700717 | 700873 | CSAR_peak_! | 10.17,7.34,7.  | - |
| chr2 | 755368 | 755426 | CSAR_peak_! | 7.27           | - |
| chr2 | 756641 | 756683 | CSAR_peak_! | 14.88          | - |
| chr2 | 756915 | 756972 | CSAR_peak_! | 12.13,7.27     | - |
| chr2 | 757580 | 757625 | CSAR_peak_! | 9.58           | - |
| chr2 | 757860 | 757948 | CSAR_peak_! | 22.56,12.13    | - |
| chr2 | 758210 | 758301 | CSAR_peak_! | 20.54,21.68    | - |
| chr2 | 758376 | 758514 | CSAR_peak_! | 42.64,14.88    | - |
| chr2 | 758602 | 758717 | CSAR_peak_! | 44.58,22.85    | - |
| chr2 | 758736 | 758961 | CSAR_peak_! | 16.05,20.12,   | - |
| chr2 | 758967 | 759034 | CSAR_peak_! | 25.07,9.72,4(- | - |
| chr2 | 759086 | 759161 | CSAR_peak_! | 22.56,27.64    | - |
| chr2 | 759249 | 759488 | CSAR_peak_! | 21.35,19.45,-  | - |
| chr2 | 759539 | 759750 | CSAR_peak_! | 9.72,9.48,23.  | - |
| chr2 | 759804 | 759845 | CSAR_peak_! | 7.92,9.58      | - |
| chr2 | 759878 | 759973 | CSAR_peak_! | 22.69,21.56,-  | - |
| chr2 | 760018 | 760119 | CSAR_peak_! | 22.45,16.34,-  | - |
| chr2 | 760213 | 760357 | CSAR_peak_! | 26.64,20.94    | - |
| chr2 | 760377 | 760461 | CSAR_peak_! | 20.76,13.29    | - |
| chr2 | 760504 | 760565 | CSAR_peak_! | 12.13          | - |
| chr2 | 760622 | 760700 | CSAR_peak_! | 19.96,7.27     | - |
| chr2 | 766313 | 766357 | CSAR_peak_! | 9.58           | - |
| chr2 | 766818 | 766880 | CSAR_peak_! | 13.69,6.81     | - |
| chr2 | 766999 | 767041 | CSAR_peak_! | 7.34           | - |
| chr2 | 797167 | 797368 | CSAR_peak_! | 18.95,12.13,(  | - |
| chr2 | 797672 | 797796 | CSAR_peak_! | 29.4,19.36     | - |
| chr2 | 797868 | 797950 | CSAR_peak_! | 12.13,8.39     | - |
| chr2 | 798011 | 798036 | CSAR_peak_! | 6.21           | - |
| chr2 | 798124 | 798210 | CSAR_peak_! | 9.58           | - |
| chr2 | 798528 | 798571 | CSAR_peak_! | 8.39           | - |
| chr2 | 805346 | 805402 | CSAR_peak_! | 6.21,7.27      | - |
| chr2 | 805854 | 805899 | CSAR_peak_! | 5.86           | - |
| chr2 | 806429 | 806455 | CSAR_peak_! | 8.28           | - |
| chr2 | 828970 | 829012 | CSAR_peak_! | 7.27           | - |
| chr2 | 829315 | 829337 | CSAR_peak_! | 7.27           | - |
| chr2 | 829456 | 829564 | CSAR_peak_! | 24.21          | - |
| chr2 | 829793 | 829863 | CSAR_peak_! | 9.77           | - |
| chr2 | 830866 | 830914 | CSAR_peak_! | 7.27           | - |
| chr2 | 830917 | 830951 | CSAR_peak_! | 17.4,10.83     | - |

|      |         |         |             |               |   |
|------|---------|---------|-------------|---------------|---|
| chr2 | 831044  | 831104  | CSAR_peak_! | 19.96         | - |
| chr2 | 832077  | 832138  | CSAR_peak_! | 7.27          | - |
| chr2 | 862238  | 862294  | CSAR_peak_! | 6.21,7.27     | - |
| chr2 | 862479  | 862515  | CSAR_peak_! | 9.77          | - |
| chr2 | 862611  | 862655  | CSAR_peak_! | 14.88         | - |
| chr2 | 863606  | 863656  | CSAR_peak_! | 7.27          | - |
| chr2 | 863787  | 863871  | CSAR_peak_! | 8.39,14.88    | - |
| chr2 | 867118  | 867163  | CSAR_peak_! | 7.27,9.58     | - |
| chr2 | 867524  | 867578  | CSAR_peak_! | 6.21          | - |
| chr2 | 967475  | 967527  | CSAR_peak_! | 6.21          | - |
| chr2 | 969568  | 969613  | CSAR_peak_! | 7.27          | - |
| chr2 | 971428  | 971508  | CSAR_peak_! | 8.39          | - |
| chr2 | 971599  | 971677  | CSAR_peak_! | 29.2,24.21    | - |
| chr2 | 972318  | 972402  | CSAR_peak_! | 12.13         | - |
| chr2 | 973529  | 973823  | CSAR_peak_! | 24.17,15.2,3! | - |
| chr2 | 973903  | 973992  | CSAR_peak_! | 26.54,26.37   | - |
| chr2 | 973997  | 974053  | CSAR_peak_! | 10.02         | - |
| chr2 | 974118  | 974199  | CSAR_peak_! | 12.94,19.96   | - |
| chr2 | 974270  | 974425  | CSAR_peak_! | 25.91,20.13   | - |
| chr2 | 974494  | 974508  | CSAR_peak_! | 12.13         | - |
| chr2 | 974552  | 974623  | CSAR_peak_! | 10.83,14.59,! | - |
| chr2 | 974846  | 974982  | CSAR_peak_! | 25.91,20.07,! | - |
| chr2 | 975068  | 975251  | CSAR_peak_! | 7.27,12.74,1! | - |
| chr2 | 975331  | 975464  | CSAR_peak_! | 12.74,12.6    | - |
| chr2 | 975532  | 975611  | CSAR_peak_! | 34.08,19.68   | - |
| chr2 | 975617  | 975737  | CSAR_peak_! | 40.66,16.11   | - |
| chr2 | 975811  | 976075  | CSAR_peak_! | 17.82,9.77,7. | - |
| chr2 | 976248  | 976261  | CSAR_peak_! | 7.73          | - |
| chr2 | 976283  | 976406  | CSAR_peak_! | 25.08,12.14,! | - |
| chr2 | 976601  | 976926  | CSAR_peak_! | 6.03,44.96,8. | - |
| chr2 | 976973  | 976996  | CSAR_peak_! | 7.27          | - |
| chr2 | 977089  | 977124  | CSAR_peak_! | 9.58          | - |
| chr2 | 977276  | 977345  | CSAR_peak_! | 12.13         | - |
| chr2 | 997049  | 997093  | CSAR_peak_! | 8.2,7.27      | - |
| chr2 | 1006522 | 1006570 | CSAR_peak_! | 9.58          | - |
| chr2 | 1014886 | 1014962 | CSAR_peak_! | 10.83,7.27    | - |
| chr2 | 1015044 | 1015101 | CSAR_peak_! | 9.58          | - |
| chr2 | 1015103 | 1015206 | CSAR_peak_! | 17.82         | - |
| chr2 | 1015325 | 1015448 | CSAR_peak_! | 6.57,9.77     | - |
| chr2 | 1015728 | 1015791 | CSAR_peak_! | 10.83         | - |
| chr2 | 1030856 | 1030893 | CSAR_peak_! | 6.21          | - |
| chr2 | 1030997 | 1031043 | CSAR_peak_! | 33.47         | - |



|      |         |         |             |                |   |
|------|---------|---------|-------------|----------------|---|
| chr2 | 1031152 | 1031166 | CSAR_peak_  | 14.88          | - |
| chr2 | 1031354 | 1031410 | CSAR_peak_  | 10.83,7.27     | - |
| chr2 | 1031908 | 1031960 | CSAR_peak_  | 9.58           | - |
| chr2 | 1032085 | 1032172 | CSAR_peak_  | 9.58           | - |
| chr2 | 1045920 | 1046008 | CSAR_peak_  | 6.21,25.91     | - |
| chr2 | 1046171 | 1046223 | CSAR_peak_  | 10.83          | - |
| chr2 | 1046347 | 1046380 | CSAR_peak_! | 7.27           | - |
| chr2 | 1046504 | 1046658 | CSAR_peak_  | 12.13,7.27     | - |
| chr2 | 1046868 | 1046940 | CSAR_peak_  | 9.58           | - |
| chr2 | 1101198 | 1101278 | CSAR_peak_! | 9.58           | - |
| chr2 | 1104626 | 1104677 | CSAR_peak_! | 6.71           | - |
| chr2 | 1104682 | 1104731 | CSAR_peak_! | 7.34,11.14     | - |
| chr2 | 1104824 | 1104885 | CSAR_peak_! | 12.13,13.66    | - |
| chr2 | 1104969 | 1105035 | CSAR_peak_! | 25.91,6.81     | - |
| chr2 | 1105135 | 1105188 | CSAR_peak_  | 9.58,19.36     | - |
| chr2 | 1105880 | 1105922 | CSAR_peak_! | 8.39           | - |
| chr2 | 1105947 | 1105992 | CSAR_peak_! | 8.95,6.21      | - |
| chr2 | 1106003 | 1106070 | CSAR_peak_! | 13.48          | - |
| chr2 | 1106270 | 1106327 | CSAR_peak_  | 8.09           | - |
| chr2 | 1106403 | 1106450 | CSAR_peak_  | 10.83          | - |
| chr2 | 1137892 | 1138023 | CSAR_peak_! | 17.82,19.36    | - |
| chr2 | 1138453 | 1138527 | CSAR_peak_  | 24.21,7.27     | - |
| chr2 | 1138593 | 1138698 | CSAR_peak_  | 7.27,17.28,6.  | - |
| chr2 | 1138850 | 1139021 | CSAR_peak_  | 12.17,14.88    | - |
| chr2 | 1139093 | 1139241 | CSAR_peak_  | 12.13          | - |
| chr2 | 1139269 | 1139341 | CSAR_peak_! | 9.41           | - |
| chr2 | 1139408 | 1139467 | CSAR_peak_! | 12.5,5.86,9.5- | - |
| chr2 | 1139535 | 1139575 | CSAR_peak_! | 12.17          | - |
| chr2 | 1139584 | 1139608 | CSAR_peak_! | 7.58,6.03      | - |
| chr2 | 1139806 | 1139863 | CSAR_peak_  | 16.19,17.37    | - |
| chr2 | 1165141 | 1165202 | CSAR_peak_  | 7,9.77         | - |
| chr2 | 1165502 | 1165566 | CSAR_peak_! | 8.39,9.58      | - |
| chr2 | 1501867 | 1501957 | CSAR_peak_! | 7.27           | - |
| chr2 | 1502127 | 1502179 | CSAR_peak_  | 7.27           | - |
| chr2 | 1502754 | 1502802 | CSAR_peak_! | 7.27,7.27      | - |
| chr2 | 1574818 | 1574923 | CSAR_peak_  | 5.86,14.85,1(- | - |
| chr2 | 1575162 | 1575200 | CSAR_peak_  | 7              | - |
| chr2 | 1581959 | 1582032 | CSAR_peak_! | 9.58           | - |
| chr2 | 1582510 | 1582557 | CSAR_peak_! | 8.39           | - |
| chr2 | 1583091 | 1583119 | CSAR_peak_  | 10.83          | - |
| chr2 | 1584224 | 1584264 | CSAR_peak_  | 6.21           | - |
| chr2 | 1620209 | 1620252 | CSAR_peak_! | 7.27           | - |

|      |         |         |             |               |   |
|------|---------|---------|-------------|---------------|---|
| chr2 | 1698550 | 1698618 | CSAR_peak_! | 14.88,9.77    | - |
| chr2 | 1699277 | 1699327 | CSAR_peak_! | 9.58          | - |
| chr2 | 1699754 | 1699822 | CSAR_peak_! | 19.36         | - |
| chr2 | 1700009 | 1700150 | CSAR_peak_! | 9.58,12.13,1: | - |
| chr2 | 1700281 | 1700342 | CSAR_peak_: | 10.83         | - |
| chr2 | 1799332 | 1799414 | CSAR_peak_! | 16.77,11.43   | - |
| chr2 | 1799470 | 1799545 | CSAR_peak_: | 8.84          | - |
| chr2 | 1799617 | 1799880 | CSAR_peak_! | 24.29,28.49,: | - |
| chr2 | 1799889 | 1800112 | CSAR_peak_! | 36.2,29.3     | - |
| chr2 | 1800184 | 1800266 | CSAR_peak_: | 29.2,14.88    | - |
| chr2 | 1823176 | 1823276 | CSAR_peak_: | 16.33,17.82   | - |
| chr2 | 1823286 | 1823433 | CSAR_peak_: | 23.2,7.27,14  | - |
| chr2 | 1823443 | 1823558 | CSAR_peak_: | 8.84          | - |
| chr2 | 1823580 | 1824158 | CSAR_peak_: | 46.82,11.03,: | - |
| chr2 | 1824174 | 1824358 | CSAR_peak_! | 28.21,38.35,: | - |
| chr2 | 1933528 | 1933590 | CSAR_peak_: | 12.17,17.37   | - |
| chr2 | 1933771 | 1933820 | CSAR_peak_: | 10.83         | - |
| chr2 | 1933856 | 1933891 | CSAR_peak_! | 6.57          | - |
| chr2 | 1933893 | 1933936 | CSAR_peak_: | 5.86          | - |
| chr2 | 2184562 | 2184885 | CSAR_peak_: | 113.8,44.21,! | - |
| chr2 | 2185054 | 2185091 | CSAR_peak_: | 11.92         | - |
| chr2 | 2214354 | 2214424 | CSAR_peak_! | 6.81          | - |
| chr2 | 2214484 | 2214544 | CSAR_peak_! | 9.58          | - |
| chr2 | 2215100 | 2215143 | CSAR_peak_: | 6.95          | - |
| chr2 | 2215172 | 2215242 | CSAR_peak_: | 7.27          | - |
| chr2 | 2215286 | 2215390 | CSAR_peak_: | 7.27,8.39     | - |
| chr2 | 2215398 | 2215465 | CSAR_peak_! | 10.31         | - |
| chr2 | 2215482 | 2215530 | CSAR_peak_! | 7.27          | - |
| chr2 | 2269607 | 2269663 | CSAR_peak_: | 16.33         | - |
| chr2 | 2269933 | 2269955 | CSAR_peak_: | 6.44          | - |
| chr2 | 2270048 | 2270123 | CSAR_peak_! | 14.76         | - |
| chr2 | 2270476 | 2270496 | CSAR_peak_: | 9.58          | - |
| chr2 | 2270588 | 2270649 | CSAR_peak_! | 17.82,16.33   | - |
| chr2 | 2270673 | 2270787 | CSAR_peak_: | 14.76,12.13   | - |
| chr2 | 2270832 | 2270895 | CSAR_peak_: | 13.44         | - |
| chr2 | 2271035 | 2271162 | CSAR_peak_: | 10.31,14.88   | - |
| chr2 | 2271185 | 2271335 | CSAR_peak_! | 14.85,9.58,8. | - |
| chr2 | 2271359 | 2271416 | CSAR_peak_: | 9.58          | - |
| chr2 | 2271429 | 2271506 | CSAR_peak_: | 9.58          | - |
| chr2 | 2287874 | 2287963 | CSAR_peak_! | 12.13,14.88   | - |
| chr2 | 2287976 | 2288043 | CSAR_peak_: | 19.36         | - |
| chr2 | 2288115 | 2288222 | CSAR_peak_: | 12.13,12.13   | - |

|      |         |         |             |                |
|------|---------|---------|-------------|----------------|
| chr2 | 2288477 | 2288611 | CSAR_peak_! | 14.88,8.14,1!  |
| chr2 | 2288650 | 2288690 | CSAR_peak_! | 12.13,13.48 -  |
| chr2 | 2288703 | 2288786 | CSAR_peak_! | 22.56,19.36 -  |
| chr2 | 2288863 | 2288907 | CSAR_peak_! | 17.82,8.39 -   |
| chr2 | 2358748 | 2358931 | CSAR_peak_! | 25.85,27.64 -  |
| chr2 | 2358953 | 2359139 | CSAR_peak_! | 12.13,18.95 -  |
| chr2 | 2359203 | 2359503 | CSAR_peak_! | 62.11,16.33,-  |
| chr2 | 2359532 | 2359560 | CSAR_peak_! | 8.9 -          |
| chr2 | 2359593 | 2359797 | CSAR_peak_! | 35.97,52.1 -   |
| chr2 | 2359851 | 2359957 | CSAR_peak_! | 11.83,12.27 -  |
| chr2 | 2359972 | 2360338 | CSAR_peak_! | 42.87,30.35,-  |
| chr2 | 2360351 | 2360399 | CSAR_peak_! | 21.24,21.94 -  |
| chr2 | 2360409 | 2360454 | CSAR_peak_! | 9.27 -         |
| chr2 | 2360471 | 2360577 | CSAR_peak_! | 14.88,14.88,-  |
| chr2 | 2360602 | 2360698 | CSAR_peak_! | 17.28,25.91 -  |
| chr2 | 2360769 | 2360837 | CSAR_peak_! | 9.58 -         |
| chr2 | 2361035 | 2361235 | CSAR_peak_! | 17.68,12.13,-  |
| chr2 | 2361444 | 2361508 | CSAR_peak_! | 10.83,20.94 -  |
| chr2 | 2361542 | 2361655 | CSAR_peak_! | 96.98,42.76 -  |
| chr2 | 2361666 | 2362047 | CSAR_peak_! | 38.47,13.69,-  |
| chr2 | 2362085 | 2362175 | CSAR_peak_! | 28.94,5.62,4(- |
| chr2 | 2429366 | 2429449 | CSAR_peak_! | 7 -            |
| chr2 | 2429521 | 2429595 | CSAR_peak_! | 6.21 -         |
| chr2 | 2429951 | 2429959 | CSAR_peak_! | 8.95 -         |
| chr2 | 2430062 | 2430185 | CSAR_peak_! | 14.88,16.11,-  |
| chr2 | 2433361 | 2433430 | CSAR_peak_! | 12.13,9.58 -   |
| chr2 | 2433963 | 2434009 | CSAR_peak_! | 7.58 -         |
| chr2 | 2587897 | 2587927 | CSAR_peak_! | 7.27 -         |
| chr2 | 2587987 | 2588046 | CSAR_peak_! | 6.21 -         |
| chr2 | 2588078 | 2588129 | CSAR_peak_! | 8.39 -         |
| chr2 | 2588207 | 2588252 | CSAR_peak_! | 10.02,7.58 -   |
| chr2 | 2589146 | 2589191 | CSAR_peak_! | 17.4,17.4 -    |
| chr2 | 2589210 | 2589344 | CSAR_peak_! | 7.58,13.69,1(- |
| chr2 | 2589389 | 2589407 | CSAR_peak_! | 17.82 -        |
| chr2 | 2589486 | 2589658 | CSAR_peak_! | 30.25,40.67 -  |
| chr2 | 2589700 | 2589764 | CSAR_peak_! | 19.36,21.56 -  |
| chr2 | 2589814 | 2589880 | CSAR_peak_! | 12.13,8.14 -   |
| chr2 | 2892234 | 2892283 | CSAR_peak_! | 10.83 -        |
| chr2 | 2981468 | 2981537 | CSAR_peak_! | 13.48 -        |
| chr2 | 2981777 | 2981825 | CSAR_peak_! | 9.58 -         |
| chr2 | 2982050 | 2982116 | CSAR_peak_! | 13.48,10.83,-  |
| chr2 | 2982155 | 2982187 | CSAR_peak_! | 10.83 -        |

|      |         |         |             |                  |   |
|------|---------|---------|-------------|------------------|---|
| chr2 | 2982454 | 2982511 | CSAR_peak_! | 14.88            | - |
| chr2 | 3047956 | 3047992 | CSAR_peak_! | 6.81             | - |
| chr2 | 3048586 | 3048641 | CSAR_peak_! | 17.82            | - |
| chr2 | 3049977 | 3049995 | CSAR_peak_! | 9.58             | - |
| chr2 | 3050100 | 3050146 | CSAR_peak_! | 9.77,10.83       | - |
| chr2 | 3052423 | 3052490 | CSAR_peak_! | 12.13            | - |
| chr2 | 3053096 | 3053129 | CSAR_peak_! | 7.58             | - |
| chr2 | 3053594 | 3053657 | CSAR_peak_! | 11.07,11.14      | - |
| chr2 | 3053840 | 3053884 | CSAR_peak_! | 9.58             | - |
| chr2 | 3252062 | 3252113 | CSAR_peak_! | 8.09             | - |
| chr2 | 3311939 | 3311994 | CSAR_peak_! | 6.45             | - |
| chr2 | 3312270 | 3312327 | CSAR_peak_! | 6.44             | - |
| chr2 | 3396412 | 3396455 | CSAR_peak_! | 9.48             | - |
| chr2 | 3396620 | 3396661 | CSAR_peak_! | 6.21             | - |
| chr2 | 3398474 | 3398533 | CSAR_peak_! | 10.83,7.27       | - |
| chr2 | 3398597 | 3398633 | CSAR_peak_! | 5.86,10.82       | - |
| chr2 | 3398726 | 3398828 | CSAR_peak_! | 8.65,9.58        | - |
| chr2 | 3399041 | 3399102 | CSAR_peak_! | 26.05,31.2       | - |
| chr2 | 3400110 | 3400156 | CSAR_peak_! | 7.58             | - |
| chr2 | 3467947 | 3468005 | CSAR_peak_! | 7.27             | - |
| chr2 | 3469603 | 3469689 | CSAR_peak_! | 12.59            | - |
| chr2 | 3471850 | 3471915 | CSAR_peak_! | 12.23            | - |
| chr2 | 3472107 | 3472134 | CSAR_peak_! | 7.27             | - |
| chr2 | 4224880 | 4224969 | CSAR_peak_! | 22.65,6.14,10.83 | - |
| chr2 | 4310143 | 4310190 | CSAR_peak_! | 6.21             | - |
| chr2 | 4311145 | 4311184 | CSAR_peak_! | 8.39             | - |
| chr2 | 4311263 | 4311438 | CSAR_peak_! | 38.71,22.58      | - |
| chr2 | 4311439 | 4311509 | CSAR_peak_! | 11.66,8.5        | - |
| chr2 | 4311626 | 4311678 | CSAR_peak_! | 6.21             | - |
| chr2 | 4311711 | 4311800 | CSAR_peak_! | 22.09,8.65       | - |
| chr2 | 4311906 | 4311959 | CSAR_peak_! | 18.95,9.77       | - |
| chr2 | 4341466 | 4341505 | CSAR_peak_! | 7.34             | - |
| chr2 | 4342769 | 4342809 | CSAR_peak_! | 14.88            | - |
| chr2 | 4345003 | 4345056 | CSAR_peak_! | 8.39             | - |
| chr2 | 4346279 | 4346420 | CSAR_peak_! | 14.88,6.21,6.21  | - |
| chr2 | 5004994 | 5005116 | CSAR_peak_! | 19.36,7.27       | - |
| chr2 | 5005140 | 5005201 | CSAR_peak_! | 7.27,31.73       | - |
| chr2 | 5005232 | 5005277 | CSAR_peak_! | 7.27             | - |
| chr2 | 5005279 | 5005348 | CSAR_peak_! | 14.88,10.95      | - |
| chr2 | 5005488 | 5005519 | CSAR_peak_! | 17.87,12.5       | - |
| chr2 | 5005572 | 5005665 | CSAR_peak_! | 5.86,34.16,4.86  | - |
| chr2 | 5005780 | 5005849 | CSAR_peak_! | 14.08,6.02       | - |

|      |         |         |             |              |   |
|------|---------|---------|-------------|--------------|---|
| chr2 | 5005897 | 5005947 | CSAR_peak_! | 8.95,6.21    | - |
| chr2 | 5006011 | 5006092 | CSAR_peak_! | 12.13,7.58   | - |
| chr2 | 5006097 | 5006147 | CSAR_peak_! | 8.2          | - |
| chr2 | 5006168 | 5006205 | CSAR_peak_! | 6.21         | - |
| chr2 | 5006260 | 5006336 | CSAR_peak_! | 6.21,7.27    | - |
| chr2 | 5006417 | 5006538 | CSAR_peak_! | 16.33,9.77   | - |
| chr2 | 5006541 | 5006702 | CSAR_peak_! | 9.77,14.88,1 | - |
| chr2 | 5006886 | 5006929 | CSAR_peak_! | 6.21         | - |
| chr2 | 5007094 | 5007139 | CSAR_peak_! | 7.58         | - |
| chr2 | 5007334 | 5007459 | CSAR_peak_! | 17.82        | - |
| chr2 | 5007786 | 5007871 | CSAR_peak_! | 10.83,9.77   | - |
| chr2 | 5007910 | 5007992 | CSAR_peak_! | 9.48         | - |
| chr2 | 5008044 | 5008092 | CSAR_peak_! | 7.58,10.31   | - |
| chr2 | 5049884 | 5049951 | CSAR_peak_! | 8.39,6.21    | - |
| chr2 | 5538884 | 5539045 | CSAR_peak_! | 17.82,21.35  | - |
| chr2 | 5539126 | 5539183 | CSAR_peak_! | 12.17        | - |
| chr2 | 5539489 | 5539555 | CSAR_peak_! | 16.92,12.89  | - |
| chr2 | 5539624 | 5539711 | CSAR_peak_! | 19.24,30.07  | - |
| chr2 | 5539817 | 5539885 | CSAR_peak_! | 10.95        | - |
| chr2 | 5539961 | 5540130 | CSAR_peak_! | 20.54,23.49, | - |
| chr2 | 5540264 | 5540351 | CSAR_peak_! | 10.83,24.21  | - |
| chr2 | 5540413 | 5540504 | CSAR_peak_! | 21.22,16.19  | - |
| chr2 | 5540666 | 5540705 | CSAR_peak_! | 12.17        | - |
| chr2 | 5540721 | 5541008 | CSAR_peak_! | 27.64,15.56, | - |
| chr2 | 5541235 | 5541260 | CSAR_peak_! | 10.94        | - |
| chr2 | 5544046 | 5544086 | CSAR_peak_! | 12.13        | - |
| chr2 | 5544386 | 5544463 | CSAR_peak_! | 10.83        | - |
| chr2 | 5544715 | 5544853 | CSAR_peak_! | 14.76,6.21   | - |
| chr2 | 5545148 | 5545228 | CSAR_peak_! | 25.07,15.2   | - |
| chr2 | 5545324 | 5545396 | CSAR_peak_! | 9.77         | - |
| chr2 | 5545846 | 5545958 | CSAR_peak_! | 12.13        | - |
| chr2 | 5546321 | 5546366 | CSAR_peak_! | 14.76        | - |
| chr2 | 5546392 | 5546418 | CSAR_peak_! | 6.57         | - |
| chr2 | 5546436 | 5546477 | CSAR_peak_! | 6.21         | - |
| chr2 | 5546720 | 5546765 | CSAR_peak_! | 7.27         | - |
| chr2 | 5546843 | 5546932 | CSAR_peak_! | 8.65         | - |
| chr2 | 5547085 | 5547154 | CSAR_peak_! | 10.33        | - |
| chr2 | 5547432 | 5547484 | CSAR_peak_! | 9.58         | - |
| chr2 | 5547491 | 5547551 | CSAR_peak_! | 8.13         | - |
| chr2 | 5547683 | 5547738 | CSAR_peak_! | 14.88,6.03,1 | - |
| chr2 | 5548139 | 5548227 | CSAR_peak_! | 5.95,10.95,5 | - |
| chr2 | 5548339 | 5548418 | CSAR_peak_! | 7.27,7.27    | - |

|      |         |         |             |                   |   |
|------|---------|---------|-------------|-------------------|---|
| chr2 | 5548460 | 5548518 | CSAR_peak_  | 6.21              | - |
| chr2 | 5549171 | 5549216 | CSAR_peak_! | 8.39              | - |
| chr2 | 5549528 | 5549585 | CSAR_peak_  | 12.13             | - |
| chr2 | 5549899 | 5549985 | CSAR_peak_  | 12.27,8.13        | - |
| chr2 | 5550345 | 5550410 | CSAR_peak_  | 9.58              | - |
| chr2 | 5550497 | 5550550 | CSAR_peak_  | 13.51,10.94       | - |
| chr2 | 5551245 | 5551307 | CSAR_peak_! | 9.77,8.65         | - |
| chr2 | 5551433 | 5551470 | CSAR_peak_  | 7.58              | - |
| chr2 | 5551945 | 5552011 | CSAR_peak_  | 9.48,8.28         | - |
| chr2 | 5552612 | 5552664 | CSAR_peak_  | 14.85             | - |
| chr2 | 5552792 | 5552804 | CSAR_peak_  | 6.85              | - |
| chr2 | 5552823 | 5552852 | CSAR_peak_! | 14.92,9.77        | - |
| chr2 | 5553138 | 5553229 | CSAR_peak_  | 14.92,14.12,10.83 | - |
| chr2 | 5553339 | 5553403 | CSAR_peak_  | 17.82,5.86,9.58   | - |
| chr2 | 5553405 | 5553442 | CSAR_peak_  | 6.21              | - |
| chr2 | 5553937 | 5553997 | CSAR_peak_! | 7.27              | - |
| chr2 | 5554008 | 5554068 | CSAR_peak_  | 22.56,10.02       | - |
| chr2 | 5554088 | 5554357 | CSAR_peak_  | 7.27,7.27,24.52   | - |
| chr2 | 5554576 | 5554635 | CSAR_peak_! | 31.2,13.44        | - |
| chr2 | 5554799 | 5554853 | CSAR_peak_! | 19.68,12.17       | - |
| chr2 | 5554968 | 5555035 | CSAR_peak_! | 20.94,7.27        | - |
| chr2 | 5555037 | 5555139 | CSAR_peak_! | 29.14,11.14       | - |
| chr2 | 5555179 | 5555243 | CSAR_peak_! | 12.13             | - |
| chr2 | 5555319 | 5555444 | CSAR_peak_  | 13.44,31.2        | - |
| chr2 | 5555570 | 5555627 | CSAR_peak_  | 16.33,6.03        | - |
| chr2 | 5594124 | 5594205 | CSAR_peak_! | 8.39              | - |
| chr2 | 5689751 | 5689808 | CSAR_peak_  | 22.56,7.27        | - |
| chr2 | 5775358 | 5775445 | CSAR_peak_! | 59.38,20.05       | - |
| chr2 | 5865185 | 5865254 | CSAR_peak_  | 7.58              | - |
| chr2 | 5954243 | 5954409 | CSAR_peak_! | 13,18.65,8.39     | - |
| chr2 | 5954494 | 5954533 | CSAR_peak_! | 10.95             | - |
| chr2 | 5954837 | 5954891 | CSAR_peak_! | 14.76             | - |
| chr2 | 5955076 | 5955127 | CSAR_peak_! | 7.27              | - |
| chr2 | 5955664 | 5955721 | CSAR_peak_! | 24.52             | - |
| chr2 | 5955802 | 5955886 | CSAR_peak_! | 14.85             | - |
| chr2 | 5956588 | 5956668 | CSAR_peak_! | 7.27,9.58         | - |
| chr2 | 5957900 | 5958002 | CSAR_peak_! | 16.22,5.86,10.83  | - |
| chr2 | 5958957 | 5958993 | CSAR_peak_! | 7.27              | - |
| chr2 | 5959149 | 5959178 | CSAR_peak_  | 6.21              | - |
| chr2 | 5959647 | 5959692 | CSAR_peak_  | 7.27              | - |
| chr2 | 5976736 | 5976790 | CSAR_peak_! | 7.27,10.83        | - |
| chr2 | 5977293 | 5977344 | CSAR_peak_  | 14.88,7.27        | - |

|      |         |         |             |                |   |
|------|---------|---------|-------------|----------------|---|
| chr2 | 5977746 | 5977789 | CSAR_peak_  | 7.27           | - |
| chr2 | 5977816 | 5977845 | CSAR_peak_  | 7.27           | - |
| chr2 | 5978074 | 5978131 | CSAR_peak_! | 19.36,16.33    | - |
| chr2 | 5978172 | 5978187 | CSAR_peak_  | 5.91           | - |
| chr2 | 5978409 | 5978607 | CSAR_peak_! | 20.43,6.21,1!  | - |
| chr2 | 5978795 | 5978826 | CSAR_peak_! | 7.2,6.49       | - |
| chr2 | 5978842 | 5978907 | CSAR_peak_! | 9.47,11.41,6.  | - |
| chr2 | 5978972 | 5979091 | CSAR_peak_! | 16.77,7,20.5!  | - |
| chr2 | 5979116 | 5979169 | CSAR_peak_! | 7.27,9.58      | - |
| chr2 | 5979366 | 5979533 | CSAR_peak_! | 11.38,19.36,(! | - |
| chr2 | 5979607 | 5979658 | CSAR_peak_! | 14.88,7.58     | - |
| chr2 | 5979916 | 5979982 | CSAR_peak_! | 16.87,8.65     | - |
| chr2 | 5980078 | 5980132 | CSAR_peak_  | 7.27           | - |
| chr2 | 5980149 | 5980203 | CSAR_peak_! | 11.96,10.83    | - |
| chr2 | 5980245 | 5980255 | CSAR_peak_  | 7.58           | - |
| chr2 | 5980511 | 5980596 | CSAR_peak_! | 16.87,13.29    | - |
| chr2 | 5980723 | 5980810 | CSAR_peak_  | 25.91          | - |
| chr2 | 5980843 | 5980866 | CSAR_peak_  | 12.13          | - |
| chr2 | 5980953 | 5981180 | CSAR_peak_! | 21.68,28.21,(! | - |
| chr2 | 5981184 | 5981247 | CSAR_peak_! | 17.82,7.27     | - |
| chr2 | 5981324 | 5981380 | CSAR_peak_! | 16.33,12.13    | - |
| chr2 | 5981398 | 5981475 | CSAR_peak_! | 7.27           | - |
| chr2 | 5981534 | 5981597 | CSAR_peak_! | 10.31,6.03     | - |
| chr2 | 5981650 | 5981702 | CSAR_peak_  | 17.82          | - |
| chr2 | 6041420 | 6041550 | CSAR_peak_! | 17.82,17.82    | - |
| chr2 | 6041622 | 6041675 | CSAR_peak_  | 10.83          | - |
| chr2 | 6041677 | 6041740 | CSAR_peak_  | 6.21           | - |
| chr2 | 6042163 | 6042224 | CSAR_peak_! | 7.27           | - |
| chr2 | 6042376 | 6042459 | CSAR_peak_! | 9.61,12.13     | - |
| chr2 | 6042467 | 6042488 | CSAR_peak_  | 9.58           | - |
| chr2 | 6042581 | 6042634 | CSAR_peak_! | 10.02,10.83    | - |
| chr2 | 6042819 | 6042871 | CSAR_peak_! | 7.34           | - |
| chr2 | 6042949 | 6043038 | CSAR_peak_! | 27.67,12.27,(! | - |
| chr2 | 6043149 | 6043205 | CSAR_peak_! | 7.27,9.58      | - |
| chr2 | 6300863 | 6300943 | CSAR_peak_  | 12.17          | - |
| chr2 | 6301427 | 6301553 | CSAR_peak_! | 17.4,10.31     | - |
| chr2 | 6301644 | 6301703 | CSAR_peak_! | 7.27,13.51     | - |
| chr2 | 6301803 | 6301823 | CSAR_peak_! | 6.44,7.92      | - |
| chr2 | 6301836 | 6301886 | CSAR_peak_! | 11.07,6.87     | - |
| chr2 | 6302233 | 6302252 | CSAR_peak_  | 9.58           | - |
| chr2 | 6303091 | 6303137 | CSAR_peak_  | 14.88          | - |
| chr2 | 6303191 | 6303287 | CSAR_peak_! | 14.76,12.13    | - |

|      |         |         |             |               |   |
|------|---------|---------|-------------|---------------|---|
| chr2 | 6304015 | 6304065 | CSAR_peak_! | 6.21          | - |
| chr2 | 6406248 | 6406285 | CSAR_peak_! | 7.27          | - |
| chr2 | 6406942 | 6406969 | CSAR_peak_! | 6.21          | - |
| chr2 | 6407449 | 6407486 | CSAR_peak_! | 10.83         | - |
| chr2 | 6407548 | 6407704 | CSAR_peak_! | 21.35,14.76   | - |
| chr2 | 6407952 | 6408009 | CSAR_peak_! | 14.88         | - |
| chr2 | 6618309 | 6618327 | CSAR_peak_! | 8.39          | - |
| chr2 | 6618773 | 6618807 | CSAR_peak_! | 9.58          | - |
| chr2 | 6791652 | 6791715 | CSAR_peak_! | 7.58,6.21     | - |
| chr2 | 6791794 | 6791870 | CSAR_peak_! | 17.82         | - |
| chr2 | 6835455 | 6835505 | CSAR_peak_! | 8.39          | - |
| chr2 | 6908861 | 6908903 | CSAR_peak_! | 8.39          | - |
| chr2 | 6917121 | 6917217 | CSAR_peak_! | 16.08,7.27    | - |
| chr2 | 6917768 | 6917806 | CSAR_peak_! | 7.27          | - |
| chr2 | 6917847 | 6917919 | CSAR_peak_! | 32.31,50.5    | - |
| chr2 | 6917963 | 6918285 | CSAR_peak_! | 32.45,16.49,! | - |
| chr2 | 6918319 | 6918621 | CSAR_peak_! | 20.94,7.27,1! | - |
| chr2 | 6918713 | 6918895 | CSAR_peak_! | 11.03,30.65,! | - |
| chr2 | 6918911 | 6919246 | CSAR_peak_! | 21.53,14.88,! | - |
| chr2 | 6919294 | 6919348 | CSAR_peak_! | 12.74         | - |
| chr2 | 6919373 | 6919527 | CSAR_peak_! | 7.11,29.48,1! | - |
| chr2 | 6919545 | 6919793 | CSAR_peak_! | 46.78,23.89,! | - |
| chr2 | 6919891 | 6920024 | CSAR_peak_! | 12.6,16.23,2! | - |
| chr2 | 6920048 | 6920193 | CSAR_peak_! | 58.79,74.75   | - |
| chr2 | 6920319 | 6921361 | CSAR_peak_! | 42.33,50.62,! | - |
| chr2 | 6921371 | 6921835 | CSAR_peak_! | 69.35,18.88,! | - |
| chr2 | 6921865 | 6921992 | CSAR_peak_! | 25.66,30.72   | - |
| chr2 | 6933017 | 6933075 | CSAR_peak_! | 8.39          | - |
| chr2 | 6935087 | 6935164 | CSAR_peak_! | 8.65,19.36    | - |
| chr2 | 6946822 | 6946868 | CSAR_peak_! | 24.21         | - |
| chr2 | 6959830 | 6959873 | CSAR_peak_! | 7.27          | - |
| chr2 | 6983042 | 6983096 | CSAR_peak_! | 8.39          | - |
| chr2 | 7082696 | 7082711 | CSAR_peak_! | 12.13         | - |
| chr2 | 7082799 | 7082842 | CSAR_peak_! | 20.94,10.83   | - |
| chr2 | 7082967 | 7083023 | CSAR_peak_! | 7.27          | - |
| chr2 | 7083437 | 7083543 | CSAR_peak_! | 17.82,9.77    | - |
| chr2 | 7083730 | 7083782 | CSAR_peak_! | 7.27          | - |
| chr2 | 7101393 | 7101444 | CSAR_peak_! | 9.58,7.58     | - |
| chr2 | 7101459 | 7101516 | CSAR_peak_! | 10.83         | - |
| chr2 | 7101601 | 7101775 | CSAR_peak_! | 17.82,9.58    | - |
| chr2 | 7101802 | 7101884 | CSAR_peak_! | 6.21          | - |
| chr2 | 7102042 | 7102103 | CSAR_peak_! | 12.13,6.44,8. | - |



|      |         |         |             |                |   |
|------|---------|---------|-------------|----------------|---|
| chr2 | 7102484 | 7102556 | CSAR_peak_! | 20.94          | - |
| chr2 | 7106947 | 7107008 | CSAR_peak_! | 7.27           | - |
| chr2 | 7108102 | 7108156 | CSAR_peak_! | 7.27           | - |
| chr2 | 7108412 | 7108470 | CSAR_peak_! | 10.83          | - |
| chr2 | 7121399 | 7121469 | CSAR_peak_! | 12.13,6.03     | - |
| chr2 | 7121550 | 7121621 | CSAR_peak_! | 10.02,15.2     | - |
| chr2 | 7121656 | 7121716 | CSAR_peak_! | 7.27           | - |
| chr2 | 7122642 | 7122685 | CSAR_peak_! | 6.21           | - |
| chr2 | 7137302 | 7137397 | CSAR_peak_! | 8.39           | - |
| chr2 | 7138973 | 7139029 | CSAR_peak_! | 6.21           | - |
| chr2 | 7139272 | 7139346 | CSAR_peak_! | 8.39,7.27      | - |
| chr2 | 7140322 | 7140392 | CSAR_peak_! | 9.58,9.58      | - |
| chr2 | 7140505 | 7140584 | CSAR_peak_! | 7.27           | - |
| chr2 | 7140739 | 7140809 | CSAR_peak_! | 7.27           | - |
| chr2 | 7141232 | 7141294 | CSAR_peak_! | 7.27           | - |
| chr2 | 7141721 | 7141808 | CSAR_peak_! | 12.13,7.27     | - |
| chr2 | 7141868 | 7141906 | CSAR_peak_! | 20.43,8.95     | - |
| chr2 | 7143175 | 7143255 | CSAR_peak_! | 20.94,27.61    | - |
| chr2 | 7143610 | 7143725 | CSAR_peak_! | 16.25,5.86,6.- | - |
| chr2 | 7143812 | 7143950 | CSAR_peak_! | 22.56,34.89    | - |
| chr2 | 7144042 | 7144093 | CSAR_peak_! | 13.48          | - |
| chr2 | 7144262 | 7144476 | CSAR_peak_! | 9.77,13.48     | - |
| chr2 | 7144654 | 7144726 | CSAR_peak_! | 14.76          | - |
| chr2 | 7144760 | 7144825 | CSAR_peak_! | 14.88          | - |
| chr2 | 7145242 | 7145291 | CSAR_peak_! | 7.27,9.58      | - |
| chr2 | 7151271 | 7151373 | CSAR_peak_! | 6.21           | - |
| chr2 | 7151613 | 7151691 | CSAR_peak_! | 9.77,7.58      | - |
| chr2 | 7152272 | 7152322 | CSAR_peak_! | 9.58           | - |
| chr2 | 7152894 | 7152944 | CSAR_peak_! | 14.88          | - |
| chr2 | 7160780 | 7160837 | CSAR_peak_! | 7.27           | - |
| chr2 | 7210430 | 7210480 | CSAR_peak_! | 7.27           | - |
| chr2 | 7210710 | 7210774 | CSAR_peak_! | 9.58           | - |
| chr2 | 7211399 | 7211457 | CSAR_peak_! | 12.13          | - |
| chr2 | 7211764 | 7211872 | CSAR_peak_! | 6.21           | - |
| chr2 | 7214192 | 7214259 | CSAR_peak_! | 12.13,8.39     | - |
| chr2 | 7214268 | 7214493 | CSAR_peak_! | 7.27,7.27,5.8- | - |
| chr2 | 7214710 | 7214781 | CSAR_peak_! | 8.65,8.14,7.2- | - |
| chr2 | 7214853 | 7214914 | CSAR_peak_! | 6.21           | - |
| chr2 | 7214918 | 7215069 | CSAR_peak_! | 11.03,12.31    | - |
| chr2 | 7216864 | 7216916 | CSAR_peak_! | 13.48,6.21     | - |
| chr2 | 7221379 | 7221429 | CSAR_peak_! | 8.65           | - |
| chr2 | 7255916 | 7256013 | CSAR_peak_! | 7.58,9.58      | - |

|      |         |         |             |                |   |
|------|---------|---------|-------------|----------------|---|
| chr2 | 7256054 | 7256110 | CSAR_peak_! | 6.21           | - |
| chr2 | 7256116 | 7256229 | CSAR_peak_! | 15.56,21.37    | - |
| chr2 | 7256477 | 7256565 | CSAR_peak_! | 17.68          | - |
| chr2 | 7284762 | 7284811 | CSAR_peak_! | 7.27           | - |
| chr2 | 7284883 | 7284921 | CSAR_peak_! | 7.27           | - |
| chr2 | 7304529 | 7304579 | CSAR_peak_! | 8.39           | - |
| chr2 | 7304883 | 7304951 | CSAR_peak_! | 12.13          | - |
| chr2 | 7305042 | 7305089 | CSAR_peak_! | 7.27           | - |
| chr2 | 7323936 | 7324002 | CSAR_peak_! | 5.86           | - |
| chr2 | 7324020 | 7324048 | CSAR_peak_! | 6.57           | - |
| chr2 | 7325256 | 7325309 | CSAR_peak_! | 12.13          | - |
| chr2 | 7335665 | 7335709 | CSAR_peak_! | 10.83          | - |
| chr2 | 7336290 | 7336363 | CSAR_peak_! | 9.58           | - |
| chr2 | 7336365 | 7336400 | CSAR_peak_! | 8.39           | - |
| chr2 | 7337406 | 7337450 | CSAR_peak_! | 6.21           | - |
| chr2 | 7342857 | 7342917 | CSAR_peak_! | 7.58           | - |
| chr2 | 7343025 | 7343134 | CSAR_peak_! | 8.65,14.76     | - |
| chr2 | 7343258 | 7343326 | CSAR_peak_! | 22.58          | - |
| chr2 | 7343411 | 7343456 | CSAR_peak_! | 6.95,6.44      | - |
| chr2 | 7343719 | 7343775 | CSAR_peak_! | 9.58           | - |
| chr2 | 7344087 | 7344177 | CSAR_peak_! | 12.74,17.82    | - |
| chr2 | 7344504 | 7344579 | CSAR_peak_! | 15.2,14        | - |
| chr2 | 7344674 | 7344758 | CSAR_peak_! | 7.7,9.97       | - |
| chr2 | 7344966 | 7345019 | CSAR_peak_! | 8.28           | - |
| chr2 | 7345400 | 7345465 | CSAR_peak_! | 6.96,6.78      | - |
| chr2 | 7345557 | 7345614 | CSAR_peak_! | 14.85,7.26,6.- | - |
| chr2 | 7345766 | 7345839 | CSAR_peak_! | 14.76,14.88    | - |
| chr2 | 7345927 | 7345986 | CSAR_peak_! | 9.58,6.03      | - |
| chr2 | 7346108 | 7346162 | CSAR_peak_! | 19.36,6.02,8.- | - |
| chr2 | 7346571 | 7346695 | CSAR_peak_! | 8.89,13.6,13.- | - |
| chr2 | 7346709 | 7346860 | CSAR_peak_! | 7.73,16.78,7.- | - |
| chr2 | 7346867 | 7347076 | CSAR_peak_! | 10.02,12.35,-  | - |
| chr2 | 7443361 | 7443412 | CSAR_peak_! | 6.21           | - |
| chr2 | 7443604 | 7443680 | CSAR_peak_! | 7.27,9.58      | - |
| chr2 | 7444199 | 7444253 | CSAR_peak_! | 6.21           | - |
| chr2 | 7444316 | 7444355 | CSAR_peak_! | 6.85           | - |
| chr2 | 7444358 | 7444415 | CSAR_peak_! | 9.58,9.58      | - |
| chr2 | 7469700 | 7469755 | CSAR_peak_! | 9.58           | - |
| chr2 | 7478266 | 7478344 | CSAR_peak_! | 7.27           | - |
| chr2 | 7478531 | 7478593 | CSAR_peak_! | 7.27           | - |
| chr2 | 7479155 | 7479183 | CSAR_peak_! | 7.27           | - |
| chr2 | 7479313 | 7479399 | CSAR_peak_! | 9.58,7.58      | - |

|      |         |         |             |               |   |
|------|---------|---------|-------------|---------------|---|
| chr2 | 7479689 | 7479744 | CSAR_peak_  | 9.58,9.58     | - |
| chr2 | 7480009 | 7480044 | CSAR_peak_! | 8.39          | - |
| chr2 | 7480153 | 7480222 | CSAR_peak_: | 9.58          | - |
| chr2 | 7482359 | 7482423 | CSAR_peak_: | 12.27         | - |
| chr2 | 7482435 | 7482498 | CSAR_peak_! | 8.14,7.27     | - |
| chr2 | 7483046 | 7483088 | CSAR_peak_! | 7.27          | - |
| chr2 | 7483268 | 7483352 | CSAR_peak_! | 6.44,6.81     | - |
| chr2 | 7483666 | 7483691 | CSAR_peak_: | 7.27          | - |
| chr2 | 7484237 | 7484309 | CSAR_peak_: | 6.44,7.27     | - |
| chr2 | 7485498 | 7485551 | CSAR_peak_! | 9.58          | - |
| chr2 | 7487259 | 7487331 | CSAR_peak_! | 8.39,6.1      | - |
| chr2 | 7487954 | 7488103 | CSAR_peak_! | 13.48,9.58    | - |
| chr2 | 7489022 | 7489130 | CSAR_peak_: | 8.2,9.58,10.8 | - |
| chr2 | 7495171 | 7495192 | CSAR_peak_: | 5.86          | - |
| chr2 | 7533703 | 7533760 | CSAR_peak_: | 6.21          | - |
| chr2 | 7534159 | 7534200 | CSAR_peak_: | 7.27          | - |
| chr2 | 7534982 | 7535019 | CSAR_peak_! | 9.72          | - |
| chr2 | 7535140 | 7535170 | CSAR_peak_! | 6.02          | - |
| chr2 | 7541859 | 7541884 | CSAR_peak_: | 6.21,6.44     | - |
| chr2 | 7542172 | 7542230 | CSAR_peak_: | 8.65          | - |
| chr2 | 7542309 | 7542351 | CSAR_peak_: | 14.88         | - |
| chr2 | 7542481 | 7542551 | CSAR_peak_: | 5.86,8.39     | - |
| chr2 | 7542882 | 7542976 | CSAR_peak_! | 6.81          | - |
| chr2 | 7543108 | 7543177 | CSAR_peak_! | 8.14,12.13    | - |
| chr2 | 7543239 | 7543325 | CSAR_peak_: | 6.57,17.82,8. | - |
| chr2 | 7545666 | 7545718 | CSAR_peak_: | 9.58          | - |
| chr2 | 7545987 | 7546037 | CSAR_peak_: | 6.21          | - |
| chr2 | 7574052 | 7574132 | CSAR_peak_! | 7.27          | - |
| chr2 | 7576889 | 7576942 | CSAR_peak_: | 7.27          | - |
| chr2 | 7577181 | 7577221 | CSAR_peak_: | 9.58          | - |
| chr2 | 7590512 | 7590696 | CSAR_peak_! | 16.22,19.96   | - |
| chr2 | 7590714 | 7590836 | CSAR_peak_! | 10.95,22.56   | - |
| chr2 | 7590918 | 7590982 | CSAR_peak_: | 29.2,17.82    | - |
| chr2 | 7591064 | 7591125 | CSAR_peak_! | 14.88,7.92    | - |
| chr2 | 7591493 | 7591663 | CSAR_peak_: | 16.22,8.09    | - |
| chr2 | 7591763 | 7591880 | CSAR_peak_! | 25.62,13.48,; | - |
| chr2 | 7591907 | 7591922 | CSAR_peak_: | 6.21          | - |
| chr2 | 7591994 | 7592048 | CSAR_peak_! | 12.6,7.58     | - |
| chr2 | 7592168 | 7592243 | CSAR_peak_! | 20.13,13.29   | - |
| chr2 | 7592620 | 7592653 | CSAR_peak_! | 14.88         | - |
| chr2 | 7592661 | 7592722 | CSAR_peak_! | 9.55          | - |
| chr2 | 7592755 | 7592804 | CSAR_peak_: | 13.44,5.86    | - |

|      |         |         |             |                  |
|------|---------|---------|-------------|------------------|
| chr2 | 7592824 | 7592999 | CSAR_peak_1 | 12.17,5.86,10.27 |
| chr2 | 7593033 | 7593076 | CSAR_peak_1 | 7.27             |
| chr2 | 7593242 | 7593360 | CSAR_peak_1 | 19.36,6.81,10.27 |
| chr2 | 7593553 | 7593591 | CSAR_peak_1 | 15.96            |
| chr2 | 7593710 | 7593771 | CSAR_peak_1 | 8.65             |
| chr2 | 7608578 | 7608636 | CSAR_peak_1 | 7.58,8.39        |
| chr2 | 7608697 | 7608770 | CSAR_peak_1 | 8.39,9.58        |
| chr2 | 7608868 | 7608916 | CSAR_peak_1 | 7                |
| chr2 | 7609135 | 7609187 | CSAR_peak_1 | 7.27             |
| chr2 | 7609422 | 7609480 | CSAR_peak_1 | 8.39             |
| chr2 | 7609820 | 7609884 | CSAR_peak_1 | 8.39             |
| chr2 | 7610007 | 7610059 | CSAR_peak_1 | 8.39             |
| chr2 | 7613493 | 7613541 | CSAR_peak_1 | 7.27             |
| chr2 | 7614012 | 7614074 | CSAR_peak_1 | 12.72,25.18      |
| chr2 | 7614325 | 7614381 | CSAR_peak_1 | 7.27             |
| chr2 | 7614694 | 7614742 | CSAR_peak_1 | 12.13            |
| chr2 | 7614855 | 7614898 | CSAR_peak_1 | 14.88,5.86       |
| chr2 | 7635099 | 7635154 | CSAR_peak_1 | 9.77,9.77        |
| chr2 | 7635250 | 7635301 | CSAR_peak_1 | 12.13            |
| chr2 | 7635481 | 7635544 | CSAR_peak_1 | 8.39,7.58        |
| chr2 | 7635949 | 7636012 | CSAR_peak_1 | 25.91,12.17      |
| chr2 | 7636332 | 7636488 | CSAR_peak_1 | 9.58,33.03       |
| chr2 | 7636657 | 7636707 | CSAR_peak_1 | 6.21             |
| chr2 | 7636804 | 7636844 | CSAR_peak_1 | 5.86,9.58        |
| chr2 | 7641941 | 7642022 | CSAR_peak_1 | 7.92,12.13       |
| chr2 | 7642154 | 7642197 | CSAR_peak_1 | 8.65             |
| chr2 | 7642579 | 7642599 | CSAR_peak_1 | 7.27             |
| chr2 | 7642612 | 7642717 | CSAR_peak_1 | 11.03,5.82,10.27 |
| chr2 | 7642770 | 7642851 | CSAR_peak_1 | 14.39,10.96      |
| chr2 | 7642954 | 7643049 | CSAR_peak_1 | 9.58,6.81,8.39   |
| chr2 | 7643088 | 7643179 | CSAR_peak_1 | 12.17,8.39       |
| chr2 | 7643275 | 7643340 | CSAR_peak_1 | 15.37            |
| chr2 | 7643422 | 7643494 | CSAR_peak_1 | 29.81,18.73      |
| chr2 | 7668397 | 7668447 | CSAR_peak_1 | 7.27,10.83       |
| chr2 | 7668704 | 7668752 | CSAR_peak_1 | 9.58             |
| chr2 | 7668981 | 7669016 | CSAR_peak_1 | 9.58             |
| chr2 | 7669295 | 7669413 | CSAR_peak_1 | 5.86,9.77,6.21   |
| chr2 | 7685720 | 7685810 | CSAR_peak_1 | 13.44            |
| chr2 | 7687713 | 7687761 | CSAR_peak_1 | 6.21             |
| chr2 | 7725445 | 7725492 | CSAR_peak_1 | 7.58             |
| chr2 | 7725839 | 7725947 | CSAR_peak_1 | 9.58,9.77,25.18  |
| chr2 | 7726072 | 7726168 | CSAR_peak_1 | 9.58,13.48,5.86  |

|      |         |         |             |               |   |
|------|---------|---------|-------------|---------------|---|
| chr2 | 7743341 | 7743370 | CSAR_peak_! | 7.27          | - |
| chr2 | 7743705 | 7743801 | CSAR_peak_! | 8.14,6.21     | - |
| chr2 | 7744662 | 7744713 | CSAR_peak_! | 7.27,6.21     | - |
| chr2 | 7744796 | 7744839 | CSAR_peak_! | 11.38         | - |
| chr2 | 7744933 | 7744946 | CSAR_peak_! | 6.03          | - |
| chr2 | 7745103 | 7745169 | CSAR_peak_! | 6.21          | - |
| chr2 | 7746162 | 7746241 | CSAR_peak_! | 7.27          | - |
| chr2 | 7747827 | 7747890 | CSAR_peak_! | 8.28          | - |
| chr2 | 7747918 | 7747962 | CSAR_peak_! | 5.86          | - |
| chr2 | 7753880 | 7753923 | CSAR_peak_! | 8.65,9.77     | - |
| chr2 | 7754128 | 7754195 | CSAR_peak_! | 18.95,10.02   | - |
| chr2 | 7754211 | 7754421 | CSAR_peak_! | 45.14,37.06   | - |
| chr2 | 7754437 | 7754554 | CSAR_peak_! | 32.83,24.21   | - |
| chr2 | 7754566 | 7754621 | CSAR_peak_! | 8.39          | - |
| chr2 | 7754675 | 7755270 | CSAR_peak_! | 60.85,67.55   | - |
| chr2 | 7755308 | 7755359 | CSAR_peak_! | 6.21          | - |
| chr2 | 7755370 | 7755645 | CSAR_peak_! | 56.15,60.72   | - |
| chr2 | 7755647 | 7755898 | CSAR_peak_! | 48.11,28.94   | - |
| chr2 | 7755908 | 7756069 | CSAR_peak_! | 16.11,6.85,3! | - |
| chr2 | 7756093 | 7756960 | CSAR_peak_! | 25.39,86.53,! | - |
| chr2 | 7756962 | 7757033 | CSAR_peak_! | 21.12,26.09   | - |
| chr2 | 7757061 | 7757107 | CSAR_peak_! | 38.04,40.49   | - |
| chr2 | 7757141 | 7757202 | CSAR_peak_! | 18.43,7.87    | - |
| chr2 | 7757211 | 7757333 | CSAR_peak_! | 65.9,63.1     | - |
| chr2 | 7757464 | 7757506 | CSAR_peak_! | 5.99          | - |
| chr2 | 7757522 | 7757697 | CSAR_peak_! | 13.29,9.61,1! | - |
| chr2 | 7757768 | 7757827 | CSAR_peak_! | 11.63,7.68    | - |
| chr2 | 7764334 | 7764419 | CSAR_peak_! | 9.48,6.1      | - |
| chr2 | 7764588 | 7764644 | CSAR_peak_! | 9.55          | - |
| chr2 | 7764676 | 7764879 | CSAR_peak_! | 9.48,8.14     | - |
| chr2 | 7764965 | 7765012 | CSAR_peak_! | 6.21          | - |
| chr2 | 7765129 | 7765197 | CSAR_peak_! | 14.88         | - |
| chr2 | 7767018 | 7767075 | CSAR_peak_! | 6.21,10.02    | - |
| chr2 | 7767178 | 7767251 | CSAR_peak_! | 13.48,7.58    | - |
| chr2 | 7784543 | 7784579 | CSAR_peak_! | 8.95          | - |
| chr2 | 7784653 | 7784707 | CSAR_peak_! | 9.27,9.58     | - |
| chr2 | 7786170 | 7786216 | CSAR_peak_! | 7.27          | - |
| chr2 | 7786347 | 7786406 | CSAR_peak_! | 8.39          | - |
| chr2 | 7786621 | 7786661 | CSAR_peak_! | 8.39          | - |
| chr2 | 7787530 | 7787568 | CSAR_peak_! | 6.03          | - |
| chr2 | 7788139 | 7788224 | CSAR_peak_! | 7.58          | - |
| chr2 | 7791623 | 7791668 | CSAR_peak_! | 7.27          | - |

|      |         |         |             |                   |   |
|------|---------|---------|-------------|-------------------|---|
| chr2 | 7791908 | 7791961 | CSAR_peak_! | 6.21              | - |
| chr2 | 7793095 | 7793132 | CSAR_peak_! | 12.13             | - |
| chr2 | 7794359 | 7794430 | CSAR_peak_! | 9.58              | - |
| chr2 | 7794943 | 7795035 | CSAR_peak_! | 8.39              | - |
| chr2 | 7795423 | 7795476 | CSAR_peak_! | 7.27,10.83        | - |
| chr2 | 7799970 | 7800033 | CSAR_peak_! | 12.13,7.92,14.88  | - |
| chr2 | 7800152 | 7800197 | CSAR_peak_! | 10.02,18.73       | - |
| chr2 | 7802173 | 7802224 | CSAR_peak_! | 16.33             | - |
| chr2 | 7820102 | 7820139 | CSAR_peak_! | 7.27,5.86         | - |
| chr2 | 7820350 | 7820416 | CSAR_peak_! | 7.27              | - |
| chr2 | 7820719 | 7820772 | CSAR_peak_! | 12.13             | - |
| chr2 | 7898351 | 7898408 | CSAR_peak_! | 12.13             | - |
| chr2 | 7898525 | 7898747 | CSAR_peak_! | 12.13,39.92,14.88 | - |
| chr2 | 7898767 | 7898808 | CSAR_peak_! | 6.21              | - |
| chr2 | 7899022 | 7899083 | CSAR_peak_! | 8.95              | - |
| chr2 | 7921133 | 7921155 | CSAR_peak_! | 7.58              | - |
| chr2 | 7925727 | 7925763 | CSAR_peak_! | 6.21              | - |
| chr2 | 7948462 | 7948537 | CSAR_peak_! | 8.5,10.83         | - |
| chr2 | 7948777 | 7948868 | CSAR_peak_! | 6.21              | - |
| chr2 | 7949415 | 7949494 | CSAR_peak_! | 8.39              | - |
| chr2 | 7949647 | 7949693 | CSAR_peak_! | 6.21              | - |
| chr2 | 7949896 | 7949956 | CSAR_peak_! | 13.44,16.11       | - |
| chr2 | 7950080 | 7950169 | CSAR_peak_! | 7.92,7.58         | - |
| chr2 | 7950435 | 7950492 | CSAR_peak_! | 6.21              | - |
| chr2 | 7950600 | 7950650 | CSAR_peak_! | 8.39,6.21         | - |
| chr2 | 7951886 | 7951932 | CSAR_peak_! | 7.27,8.39         | - |
| chr2 | 7952077 | 7952122 | CSAR_peak_! | 8.65              | - |
| chr2 | 7952465 | 7952507 | CSAR_peak_! | 7.27,7.27         | - |
| chr2 | 7953071 | 7953091 | CSAR_peak_! | 9.58              | - |
| chr2 | 7953182 | 7953278 | CSAR_peak_! | 16.87,24.21       | - |
| chr2 | 7953313 | 7953317 | CSAR_peak_! | 8.39              | - |
| chr2 | 7953386 | 7953470 | CSAR_peak_! | 25.91,14.88       | - |
| chr2 | 7953546 | 7953573 | CSAR_peak_! | 9.58              | - |
| chr2 | 7953575 | 7953643 | CSAR_peak_! | 8.65,7.58         | - |
| chr2 | 7953656 | 7953750 | CSAR_peak_! | 19.36,7.58,6.21   | - |
| chr2 | 7953766 | 7953883 | CSAR_peak_! | 23.68,14.88       | - |
| chr2 | 7953903 | 7953945 | CSAR_peak_! | 5.95              | - |
| chr2 | 7954063 | 7954169 | CSAR_peak_! | 38.1,11.07        | - |
| chr2 | 7954242 | 7954284 | CSAR_peak_! | 8.39,6.21         | - |
| chr2 | 7995514 | 7995594 | CSAR_peak_! | 14.88,12.13       | - |
| chr2 | 7995778 | 7995832 | CSAR_peak_! | 9.77              | - |
| chr2 | 7995878 | 7996112 | CSAR_peak_! | 33.75,28.62,14.88 | - |

|      |         |         |             |               |   |
|------|---------|---------|-------------|---------------|---|
| chr2 | 7996394 | 7996450 | CSAR_peak_! | 24.21,11.66   | - |
| chr2 | 7996503 | 7996550 | CSAR_peak_! | 13.69         | - |
| chr2 | 7996687 | 7996854 | CSAR_peak_! | 25.21,24.64   | - |
| chr2 | 7996855 | 7996892 | CSAR_peak_! | 9.48          | - |
| chr2 | 7996935 | 7997033 | CSAR_peak_! | 25.91,26.69   | - |
| chr2 | 8195668 | 8195730 | CSAR_peak_! | 9.58          | - |
| chr2 | 8195892 | 8195935 | CSAR_peak_! | 6.21          | - |
| chr2 | 8374344 | 8374400 | CSAR_peak_! | 8.39          | - |
| chr2 | 8374617 | 8374672 | CSAR_peak_! | 7.27          | - |
| chr2 | 8434015 | 8434073 | CSAR_peak_! | 9.58          | - |
| chr2 | 8434162 | 8434232 | CSAR_peak_! | 7.34,10.02    | - |
| chr2 | 8435107 | 8435160 | CSAR_peak_! | 9.32          | - |
| chr2 | 8435243 | 8435314 | CSAR_peak_! | 10.83         | - |
| chr2 | 8435590 | 8435640 | CSAR_peak_! | 10.83,7.27    | - |
| chr2 | 8435875 | 8435906 | CSAR_peak_! | 8.13          | - |
| chr2 | 8435969 | 8436055 | CSAR_peak_! | 20.94,6.44    | - |
| chr2 | 8436220 | 8436310 | CSAR_peak_! | 7.27,14.76    | - |
| chr2 | 8486463 | 8486510 | CSAR_peak_! | 7.27,5.86,13. | - |
| chr2 | 8486644 | 8486655 | CSAR_peak_! | 7.27          | - |
| chr2 | 8486742 | 8486792 | CSAR_peak_! | 13.48,9.58    | - |
| chr2 | 8487412 | 8487460 | CSAR_peak_! | 14.85,16.78   | - |
| chr2 | 8488592 | 8488629 | CSAR_peak_! | 8.39          | - |
| chr2 | 8517301 | 8517352 | CSAR_peak_! | 6.21          | - |
| chr2 | 8517391 | 8517439 | CSAR_peak_! | 8.39          | - |
| chr2 | 8531020 | 8531085 | CSAR_peak_! | 24.21,20.43   | - |
| chr2 | 8531225 | 8531316 | CSAR_peak_! | 18.85         | - |
| chr2 | 8531404 | 8531488 | CSAR_peak_! | 7.27,14,14.6  | - |
| chr2 | 8531630 | 8531679 | CSAR_peak_! | 12.72         | - |
| chr2 | 8531769 | 8531892 | CSAR_peak_! | 22.56,14.88,  | - |
| chr2 | 8532030 | 8532093 | CSAR_peak_! | 25.91,10.31   | - |
| chr2 | 8532147 | 8532222 | CSAR_peak_! | 22.74         | - |
| chr2 | 8532569 | 8532621 | CSAR_peak_! | 7.27          | - |
| chr2 | 8532641 | 8532786 | CSAR_peak_! | 21.11,12.59   | - |
| chr2 | 8532868 | 8532960 | CSAR_peak_! | 18.65,14.25   | - |
| chr2 | 8533038 | 8533100 | CSAR_peak_! | 16.25,17.37   | - |
| chr2 | 8533165 | 8533206 | CSAR_peak_! | 9.77          | - |
| chr2 | 8533214 | 8533279 | CSAR_peak_! | 24.21,13.44   | - |
| chr2 | 8557958 | 8558005 | CSAR_peak_! | 6.03          | - |
| chr2 | 8558100 | 8558176 | CSAR_peak_! | 7.11,16.08    | - |
| chr2 | 8558232 | 8558294 | CSAR_peak_! | 9.72          | - |
| chr2 | 8558373 | 8558499 | CSAR_peak_! | 11.14,34.89,  | - |
| chr2 | 8558582 | 8558674 | CSAR_peak_! | 9.58          | - |

|      |         |         |            |                |   |
|------|---------|---------|------------|----------------|---|
| chr2 | 8558768 | 8558802 | CSAR_peak_ | 7.27           | - |
| chr2 | 8558945 | 8559010 | CSAR_peak_ | 8.28,10.95     | - |
| chr2 | 8559315 | 8559400 | CSAR_peak_ | 12.13,16.05    | - |
| chr2 | 8608409 | 8608450 | CSAR_peak_ | 7.27           | - |
| chr2 | 8616650 | 8616705 | CSAR_peak_ | 6.21           | - |
| chr2 | 8616918 | 8616977 | CSAR_peak_ | 5.86,9.58      | - |
| chr2 | 8617096 | 8617162 | CSAR_peak_ | 5.86,11.03     | - |
| chr2 | 8617319 | 8617325 | CSAR_peak_ | 7.27           | - |
| chr2 | 8617730 | 8617768 | CSAR_peak_ | 12.31          | - |
| chr2 | 8617876 | 8617954 | CSAR_peak_ | 16.34,7        | - |
| chr2 | 8618335 | 8618434 | CSAR_peak_ | 8.5,9.55,9.58  | - |
| chr2 | 8618519 | 8618580 | CSAR_peak_ | 12.17,12.59    | - |
| chr2 | 8619195 | 8619222 | CSAR_peak_ | 12.74          | - |
| chr2 | 8619424 | 8619484 | CSAR_peak_ | 6.21,8.39      | - |
| chr2 | 8621192 | 8621230 | CSAR_peak_ | 6.21           | - |
| chr2 | 8632953 | 8633001 | CSAR_peak_ | 6.21           | - |
| chr2 | 8633168 | 8633236 | CSAR_peak_ | 6.21,7.27      | - |
| chr2 | 8634283 | 8634371 | CSAR_peak_ | 7.58           | - |
| chr2 | 8634649 | 8634696 | CSAR_peak_ | 6.21           | - |
| chr2 | 8639285 | 8639332 | CSAR_peak_ | 8.65           | - |
| chr2 | 8649988 | 8650025 | CSAR_peak_ | 6.21           | - |
| chr2 | 8650170 | 8650201 | CSAR_peak_ | 9.58,9.58      | - |
| chr2 | 8650365 | 8650415 | CSAR_peak_ | 13.48          | - |
| chr2 | 8650573 | 8650624 | CSAR_peak_ | 10.02          | - |
| chr2 | 8650903 | 8650961 | CSAR_peak_ | 8.39           | - |
| chr2 | 8651429 | 8651599 | CSAR_peak_ | 17.82,17.82,(- | - |
| chr2 | 8652039 | 8652159 | CSAR_peak_ | 26.69,10.02    | - |
| chr2 | 8652202 | 8652224 | CSAR_peak_ | 9.41           | - |
| chr2 | 8652387 | 8652427 | CSAR_peak_ | 6.87           | - |
| chr2 | 8652897 | 8652961 | CSAR_peak_ | 6.21,13.48     | - |
| chr2 | 8653301 | 8653362 | CSAR_peak_ | 17.82          | - |
| chr2 | 8653494 | 8653602 | CSAR_peak_ | 8.14,13.48     | - |
| chr2 | 8687639 | 8687660 | CSAR_peak_ | 9.58           | - |
| chr2 | 8687774 | 8687819 | CSAR_peak_ | 17.82          | - |
| chr2 | 8690651 | 8690700 | CSAR_peak_ | 7.27           | - |
| chr2 | 8704999 | 8705028 | CSAR_peak_ | 6.21           | - |
| chr2 | 8705647 | 8705752 | CSAR_peak_ | 14.85,5.86     | - |
| chr2 | 8711948 | 8711998 | CSAR_peak_ | 6.21           | - |
| chr2 | 8712365 | 8712407 | CSAR_peak_ | 6.21           | - |
| chr2 | 8712704 | 8712760 | CSAR_peak_ | 12.17,14.88    | - |
| chr2 | 8712862 | 8712880 | CSAR_peak_ | 6.21           | - |
| chr2 | 8713208 | 8713267 | CSAR_peak_ | 14.88,8.95     | - |



|      |         |         |             |                 |   |
|------|---------|---------|-------------|-----------------|---|
| chr2 | 8713283 | 8713307 | CSAR_peak_! | 7.27            | - |
| chr2 | 8713395 | 8713455 | CSAR_peak_! | 7.27,7.58       | - |
| chr2 | 8715353 | 8715445 | CSAR_peak_! | 12.13           | - |
| chr2 | 8715740 | 8715826 | CSAR_peak_! | 10.95,19.36     | - |
| chr2 | 8716103 | 8716159 | CSAR_peak_! | 9.77            | - |
| chr2 | 8716240 | 8716247 | CSAR_peak_! | 7.27,6.03       | - |
| chr2 | 8717171 | 8717291 | CSAR_peak_! | 14.88,7.27      | - |
| chr2 | 8717787 | 8717828 | CSAR_peak_! | 6.21            | - |
| chr2 | 8718490 | 8718557 | CSAR_peak_! | 10.83           | - |
| chr2 | 8723406 | 8723426 | CSAR_peak_! | 7.27            | - |
| chr2 | 8724600 | 8724644 | CSAR_peak_! | 7.58            | - |
| chr2 | 8740232 | 8740255 | CSAR_peak_! | 7.27            | - |
| chr2 | 8740418 | 8740454 | CSAR_peak_! | 7.27            | - |
| chr2 | 8740786 | 8740841 | CSAR_peak_! | 8.39            | - |
| chr2 | 8757285 | 8757332 | CSAR_peak_! | 9.58            | - |
| chr2 | 8757702 | 8757792 | CSAR_peak_! | 6.21            | - |
| chr2 | 8878120 | 8878218 | CSAR_peak_! | 12.17,6.21      | - |
| chr2 | 8878240 | 8878292 | CSAR_peak_! | 9.58            | - |
| chr2 | 8878315 | 8878397 | CSAR_peak_! | 14.22,7         | - |
| chr2 | 8878406 | 8878504 | CSAR_peak_! | 11.99,33.03     | - |
| chr2 | 8878638 | 8878806 | CSAR_peak_! | 9.58,17.82      | - |
| chr2 | 8878867 | 8878927 | CSAR_peak_! | 10.83           | - |
| chr2 | 8879014 | 8879117 | CSAR_peak_! | 16.19,5.62,7.-  | - |
| chr2 | 8879175 | 8879259 | CSAR_peak_! | 16.33,7.58      | - |
| chr2 | 8879379 | 8879459 | CSAR_peak_! | 7.92,7.27       | - |
| chr2 | 8879563 | 8879762 | CSAR_peak_! | 33.03,8.94,21.- | - |
| chr2 | 8879955 | 8879996 | CSAR_peak_! | 9.77,20.94      | - |
| chr2 | 8880218 | 8880332 | CSAR_peak_! | 12.13,8.18      | - |
| chr2 | 8896462 | 8896487 | CSAR_peak_! | 6.21            | - |
| chr2 | 8896598 | 8896678 | CSAR_peak_! | 13.29           | - |
| chr2 | 8896989 | 8897039 | CSAR_peak_! | 8.39            | - |
| chr2 | 8897073 | 8897264 | CSAR_peak_! | 8.39,17.4,14.-  | - |
| chr2 | 8897267 | 8897392 | CSAR_peak_! | 24.21,9.77      | - |
| chr2 | 8897716 | 8897790 | CSAR_peak_! | 12.13           | - |
| chr2 | 8897814 | 8897989 | CSAR_peak_! | 16.05,6.57      | - |
| chr2 | 8898006 | 8898257 | CSAR_peak_! | 6.81,59.99,6.-  | - |
| chr2 | 8898289 | 8898566 | CSAR_peak_! | 27.77,12.31,9.- | - |
| chr2 | 8898663 | 8898705 | CSAR_peak_! | 14.88,8.65      | - |
| chr2 | 8898780 | 8898927 | CSAR_peak_! | 19.83,17.47     | - |
| chr2 | 8899229 | 8899356 | CSAR_peak_! | 9.58,16.33,7.-  | - |
| chr2 | 8899426 | 8899488 | CSAR_peak_! | 10.83           | - |
| chr2 | 8899616 | 8899695 | CSAR_peak_! | 27.73,27.11     | - |

|      |         |         |             |               |   |
|------|---------|---------|-------------|---------------|---|
| chr2 | 8910553 | 8910602 | CSAR_peak_! | 7.27          | - |
| chr2 | 8911908 | 8912149 | CSAR_peak_! | 39.13,30.81,! | - |
| chr2 | 8912189 | 8912279 | CSAR_peak_! | 33.47,21.24   | - |
| chr2 | 8912339 | 8912457 | CSAR_peak_! | 27.17,12.22   | - |
| chr2 | 8912462 | 8912479 | CSAR_peak_! | 8.39          | - |
| chr2 | 8912483 | 8912654 | CSAR_peak_! | 10.8,31.3,16. | - |
| chr2 | 8912906 | 8912964 | CSAR_peak_! | 23.03,32.46   | - |
| chr2 | 8912974 | 8913198 | CSAR_peak_! | 19.73,36.77,! | - |
| chr2 | 8913234 | 8913383 | CSAR_peak_! | 8.14,60.05,8: | - |
| chr2 | 8913395 | 8913475 | CSAR_peak_! | 10.83,7.31    | - |
| chr2 | 8929828 | 8929910 | CSAR_peak_! | 8.9,30.21     | - |
| chr2 | 8931561 | 8931600 | CSAR_peak_! | 7.34,33.21,6! | - |
| chr2 | 8931702 | 8931785 | CSAR_peak_! | 62.43,49.14,! | - |
| chr2 | 8931843 | 8931925 | CSAR_peak_! | 15.91,50.6,5! | - |
| chr2 | 8934275 | 8934316 | CSAR_peak_! | 8.39          | - |
| chr2 | 8943321 | 8943387 | CSAR_peak_! | 16.33         | - |
| chr2 | 8943474 | 8943520 | CSAR_peak_! | 5.86          | - |
| chr2 | 8943644 | 8943683 | CSAR_peak_! | 7.27          | - |
| chr2 | 8943808 | 8943971 | CSAR_peak_! | 12.13,14.88   | - |
| chr2 | 8950676 | 8950733 | CSAR_peak_! | 7             | - |
| chr2 | 8968385 | 8968450 | CSAR_peak_! | 7.27          | - |
| chr2 | 8968629 | 8968652 | CSAR_peak_! | 6.21          | - |
| chr2 | 8969730 | 8969777 | CSAR_peak_! | 7.27          | - |
| chr2 | 8971161 | 8971249 | CSAR_peak_! | 6.03          | - |
| chr2 | 8971360 | 8971433 | CSAR_peak_! | 14.88         | - |
| chr2 | 8972111 | 8972177 | CSAR_peak_! | 7.27          | - |
| chr2 | 8972277 | 8972344 | CSAR_peak_! | 14.88,6.21    | - |
| chr2 | 8973288 | 8973325 | CSAR_peak_! | 5.86          | - |
| chr2 | 8973595 | 8973658 | CSAR_peak_! | 8.14          | - |
| chr2 | 8989832 | 8989852 | CSAR_peak_! | 6.21          | - |
| chr2 | 8989938 | 8990071 | CSAR_peak_! | 12.13,10.83   | - |
| chr2 | 8990455 | 8990542 | CSAR_peak_! | 6.21          | - |
| chr2 | 8990750 | 8990804 | CSAR_peak_! | 7.58          | - |
| chr2 | 8991251 | 8991259 | CSAR_peak_! | 7.27          | - |
| chr2 | 8991429 | 8991499 | CSAR_peak_! | 8.39          | - |
| chr2 | 8991870 | 8991907 | CSAR_peak_! | 6.03          | - |
| chr2 | 8992090 | 8992154 | CSAR_peak_! | 6.1,18.95     | - |
| chr2 | 9052029 | 9052227 | CSAR_peak_! | 21.33,6.21,1! | - |
| chr2 | 9052283 | 9052458 | CSAR_peak_! | 14.08,21.35   | - |
| chr2 | 9052490 | 9052537 | CSAR_peak_! | 10.83,17.82   | - |
| chr2 | 9052593 | 9052660 | CSAR_peak_! | 8.14,10.83,1! | - |
| chr2 | 9052943 | 9053019 | CSAR_peak_! | 7.27          | - |

|      |         |         |             |                |   |
|------|---------|---------|-------------|----------------|---|
| chr2 | 9053141 | 9053174 | CSAR_peak_! | 6.95           | - |
| chr2 | 9053177 | 9053257 | CSAR_peak_! | 9.58           | - |
| chr2 | 9053382 | 9053417 | CSAR_peak_! | 8.39           | - |
| chr2 | 9053437 | 9053519 | CSAR_peak_! | 13.51,7.27     | - |
| chr2 | 9053810 | 9053892 | CSAR_peak_! | 8.39,5.86      | - |
| chr2 | 9054335 | 9054409 | CSAR_peak_! | 6.57,6.21      | - |
| chr2 | 9055834 | 9055902 | CSAR_peak_! | 6.95           | - |
| chr2 | 9071354 | 9071430 | CSAR_peak_! | 10.02,7.27     | - |
| chr2 | 9071826 | 9071871 | CSAR_peak_! | 6.21           | - |
| chr2 | 9072073 | 9072128 | CSAR_peak_! | 12.13          | - |
| chr2 | 9103524 | 9103604 | CSAR_peak_! | 8.39           | - |
| chr2 | 9104063 | 9104105 | CSAR_peak_! | 6.21           | - |
| chr2 | 9111913 | 9111968 | CSAR_peak_! | 7.27           | - |
| chr2 | 9115552 | 9115587 | CSAR_peak_! | 6.21           | - |
| chr2 | 9128447 | 9128494 | CSAR_peak_! | 6.95           | - |
| chr2 | 9128624 | 9128700 | CSAR_peak_! | 21.24          | - |
| chr2 | 9128772 | 9128796 | CSAR_peak_! | 7.27           | - |
| chr2 | 9128962 | 9129047 | CSAR_peak_! | 17.52,19.36    | - |
| chr2 | 9129158 | 9129192 | CSAR_peak_! | 6.21           | - |
| chr2 | 9173947 | 9173993 | CSAR_peak_! | 7.27           | - |
| chr2 | 9174177 | 9174234 | CSAR_peak_! | 9.58           | - |
| chr2 | 9206225 | 9206346 | CSAR_peak_! | 6.03,17.82     | - |
| chr2 | 9206942 | 9207000 | CSAR_peak_! | 9.58,6.21      | - |
| chr2 | 9207010 | 9207074 | CSAR_peak_! | 7.27           | - |
| chr2 | 9207390 | 9207460 | CSAR_peak_! | 12.31,22.56    | - |
| chr2 | 9207645 | 9207716 | CSAR_peak_! | 7.27,7.58      | - |
| chr2 | 9207819 | 9207931 | CSAR_peak_! | 22.52,25.18    | - |
| chr2 | 9207957 | 9208012 | CSAR_peak_! | 7.27           | - |
| chr2 | 9208126 | 9208289 | CSAR_peak_! | 22.58,24.52,,- | - |
| chr2 | 9208361 | 9208416 | CSAR_peak_! | 7.27           | - |
| chr2 | 9208417 | 9208536 | CSAR_peak_! | 12.13,16.19    | - |
| chr2 | 9208566 | 9208631 | CSAR_peak_! | 12.13          | - |
| chr2 | 9208865 | 9208919 | CSAR_peak_! | 12.13          | - |
| chr2 | 9208971 | 9209102 | CSAR_peak_! | 14.88,8.14,1,- | - |
| chr2 | 9209111 | 9209276 | CSAR_peak_! | 19.36,17.52    | - |
| chr2 | 9209287 | 9209421 | CSAR_peak_! | 18.65,14.88,-  | - |
| chr2 | 9209465 | 9209682 | CSAR_peak_! | 31.2,27.94,1,- | - |
| chr2 | 9209832 | 9209886 | CSAR_peak_! | 7.27           | - |
| chr2 | 9209944 | 9210005 | CSAR_peak_! | 12.31,12.35    | - |
| chr2 | 9210108 | 9210162 | CSAR_peak_! | 14.88          | - |
| chr2 | 9210868 | 9210951 | CSAR_peak_! | 8.39,10.83     | - |
| chr2 | 9211084 | 9211134 | CSAR_peak_! | 12.13,8.39     | - |

|      |         |         |             |                  |   |
|------|---------|---------|-------------|------------------|---|
| chr2 | 9211616 | 9211688 | CSAR_peak_! | 10.31,7.58       | - |
| chr2 | 9211801 | 9211916 | CSAR_peak_! | 11.96,8.14,11.96 | - |
| chr2 | 9212027 | 9212094 | CSAR_peak_! | 12.13,8.39       | - |
| chr2 | 9212129 | 9212165 | CSAR_peak_! | 7.58             | - |
| chr2 | 9212660 | 9212706 | CSAR_peak_! | 14.88            | - |
| chr2 | 9230696 | 9230767 | CSAR_peak_! | 10.83            | - |
| chr2 | 9265018 | 9265087 | CSAR_peak_! | 9.58             | - |
| chr2 | 9265159 | 9265244 | CSAR_peak_! | 17.82,17.82      | - |
| chr2 | 9265298 | 9265467 | CSAR_peak_! | 23.54,38.54      | - |
| chr2 | 9265473 | 9266353 | CSAR_peak_! | 64.94,58.4,23.54 | - |
| chr2 | 9319552 | 9319602 | CSAR_peak_! | 7.27             | - |
| chr2 | 9320176 | 9320221 | CSAR_peak_! | 6.21             | - |
| chr2 | 9320616 | 9320712 | CSAR_peak_! | 11.38            | - |
| chr2 | 9320931 | 9320952 | CSAR_peak_! | 6.21             | - |
| chr2 | 9321257 | 9321302 | CSAR_peak_! | 8.39             | - |
| chr2 | 9321576 | 9321641 | CSAR_peak_! | 7.27             | - |
| chr2 | 9363840 | 9363911 | CSAR_peak_! | 9.77             | - |
| chr2 | 9364236 | 9364270 | CSAR_peak_! | 6.85,7.27        | - |
| chr2 | 9364273 | 9364308 | CSAR_peak_! | 8.19,6.21        | - |
| chr2 | 9364368 | 9364405 | CSAR_peak_! | 12.13,6.21       | - |
| chr2 | 9364444 | 9364490 | CSAR_peak_! | 6.21             | - |
| chr2 | 9364546 | 9364596 | CSAR_peak_! | 9.58             | - |
| chr2 | 9364666 | 9364707 | CSAR_peak_! | 6.21             | - |
| chr2 | 9364729 | 9364849 | CSAR_peak_! | 13.48,6.21       | - |
| chr2 | 9365029 | 9365091 | CSAR_peak_! | 7.27             | - |
| chr2 | 9365142 | 9365161 | CSAR_peak_! | 7.27             | - |
| chr2 | 9365239 | 9365313 | CSAR_peak_! | 14.88            | - |
| chr2 | 9365333 | 9365455 | CSAR_peak_! | 24.52,13.66      | - |
| chr2 | 9365666 | 9365723 | CSAR_peak_! | 14.88,8.39       | - |
| chr2 | 9366143 | 9366197 | CSAR_peak_! | 14.76            | - |
| chr2 | 9366228 | 9366279 | CSAR_peak_! | 9.58             | - |
| chr2 | 9366528 | 9366646 | CSAR_peak_! | 7.27,9.58        | - |
| chr2 | 9366760 | 9366821 | CSAR_peak_! | 14.88,13.48      | - |
| chr2 | 9366861 | 9366944 | CSAR_peak_! | 13.48            | - |
| chr2 | 9367073 | 9367123 | CSAR_peak_! | 6.21             | - |
| chr2 | 9367379 | 9367458 | CSAR_peak_! | 17.4,17.82       | - |
| chr2 | 9367496 | 9367571 | CSAR_peak_! | 22.74,13.44      | - |
| chr2 | 9368080 | 9368140 | CSAR_peak_! | 7.92,9.58        | - |
| chr2 | 9368144 | 9368254 | CSAR_peak_! | 19.36,10.31      | - |
| chr2 | 9368326 | 9368578 | CSAR_peak_! | 9.77,18.85,11.38 | - |
| chr2 | 9368609 | 9368665 | CSAR_peak_! | 7.27             | - |
| chr2 | 9368746 | 9368814 | CSAR_peak_! | 9.58,12.13       | - |

|      |         |         |             |                |   |
|------|---------|---------|-------------|----------------|---|
| chr2 | 9369157 | 9369211 | CSAR_peak_  | 17.82          | - |
| chr2 | 9388134 | 9388186 | CSAR_peak_  | 7.27           | - |
| chr2 | 9389773 | 9389819 | CSAR_peak_! | 7.27           | - |
| chr2 | 9426977 | 9427024 | CSAR_peak_  | 7.27           | - |
| chr2 | 9434182 | 9434195 | CSAR_peak_  | 9.77,9.77      | - |
| chr2 | 9434305 | 9434376 | CSAR_peak_  | 12.17,10.94    | - |
| chr2 | 9434537 | 9434607 | CSAR_peak_  | 9.58,12.17     | - |
| chr2 | 9434778 | 9434792 | CSAR_peak_  | 6.21           | - |
| chr2 | 9434886 | 9434985 | CSAR_peak_  | 14.88,7.27     | - |
| chr2 | 9435289 | 9435382 | CSAR_peak_! | 17.82,9.58     | - |
| chr2 | 9506183 | 9506245 | CSAR_peak_! | 17.82          | - |
| chr2 | 9507378 | 9507454 | CSAR_peak_  | 9.58           | - |
| chr2 | 9507710 | 9507767 | CSAR_peak_  | 9.58           | - |
| chr2 | 9508603 | 9508642 | CSAR_peak_! | 6.81           | - |
| chr2 | 9526292 | 9526317 | CSAR_peak_  | 6.12,8.39      | - |
| chr2 | 9526354 | 9526414 | CSAR_peak_! | 21.53          | - |
| chr2 | 9526420 | 9526586 | CSAR_peak_  | 13.09,23,12.:  | - |
| chr2 | 9526595 | 9526653 | CSAR_peak_  | 17.82          | - |
| chr2 | 9526868 | 9526925 | CSAR_peak_! | 5.65,6.14      | - |
| chr2 | 9526938 | 9527007 | CSAR_peak_  | 20.54,8.14,2(- | - |
| chr2 | 9527066 | 9527158 | CSAR_peak_  | 11.66,24.21    | - |
| chr2 | 9527162 | 9527331 | CSAR_peak_  | 9.58,40.71,2!  | - |
| chr2 | 9527338 | 9527636 | CSAR_peak_  | 13.51,12.13,;- | - |
| chr2 | 9563504 | 9563529 | CSAR_peak_  | 7.27           | - |
| chr2 | 9563698 | 9563816 | CSAR_peak_! | 25.22,29.2     | - |
| chr2 | 9563838 | 9563888 | CSAR_peak_  | 13.29          | - |
| chr2 | 9563914 | 9563970 | CSAR_peak_  | 22.56          | - |
| chr2 | 9564002 | 9564061 | CSAR_peak_  | 7.27           | - |
| chr2 | 9564119 | 9564194 | CSAR_peak_  | 14.88,7.27     | - |
| chr2 | 9564420 | 9564471 | CSAR_peak_  | 16.33          | - |
| chr2 | 9607721 | 9607763 | CSAR_peak_  | 6.21           | - |
| chr2 | 9666365 | 9666483 | CSAR_peak_! | 12.13          | - |
| chr2 | 9689592 | 9689660 | CSAR_peak_  | 9.58,7.27      | - |
| chr2 | 9689922 | 9690011 | CSAR_peak_  | 13.66          | - |
| chr2 | 9690147 | 9690213 | CSAR_peak_  | 32.86          | - |
| chr2 | 9690231 | 9690251 | CSAR_peak_! | 6.44           | - |
| chr2 | 9690475 | 9690529 | CSAR_peak_! | 8.39           | - |
| chr2 | 9690650 | 9690690 | CSAR_peak_! | 9.61           | - |
| chr2 | 9690813 | 9690848 | CSAR_peak_  | 9.58           | - |
| chr2 | 9690867 | 9690892 | CSAR_peak_! | 7.27           | - |
| chr2 | 9691169 | 9691228 | CSAR_peak_! | 12.17,8.12     | - |
| chr2 | 9691282 | 9691368 | CSAR_peak_  | 7.27           | - |

|      |          |          |            |                |   |
|------|----------|----------|------------|----------------|---|
| chr2 | 9691643  | 9691701  | CSAR_peak_ | 6.95           | - |
| chr2 | 9732112  | 9732158  | CSAR_peak_ | 7.27,7.27      | - |
| chr2 | 9732814  | 9732937  | CSAR_peak_ | 30.8,32.46     | - |
| chr2 | 9805381  | 9805431  | CSAR_peak_ | 9.58           | - |
| chr2 | 9805615  | 9805669  | CSAR_peak_ | 12.13          | - |
| chr2 | 9805980  | 9806061  | CSAR_peak_ | 8.2            | - |
| chr2 | 9806329  | 9806403  | CSAR_peak_ | 9.58,12.13     | - |
| chr2 | 9824507  | 9824573  | CSAR_peak_ | 6.44,7.27      | - |
| chr2 | 9824702  | 9824745  | CSAR_peak_ | 10.83          | - |
| chr2 | 9829708  | 9829775  | CSAR_peak_ | 7.58           | - |
| chr2 | 9838537  | 9838599  | CSAR_peak_ | 9.58,8.39      | - |
| chr2 | 9905011  | 9905099  | CSAR_peak_ | 12.59          | - |
| chr2 | 9905494  | 9905525  | CSAR_peak_ | 7.27           | - |
| chr2 | 9960723  | 9960766  | CSAR_peak_ | 8.39           | - |
| chr2 | 9961602  | 9961662  | CSAR_peak_ | 10.02,6.81,5.- | - |
| chr2 | 9961881  | 9961932  | CSAR_peak_ | 12.13          | - |
| chr2 | 9963168  | 9963214  | CSAR_peak_ | 9.58           | - |
| chr2 | 9977215  | 9977257  | CSAR_peak_ | 8.14           | - |
| chr2 | 9977262  | 9977416  | CSAR_peak_ | 8.14,9.48,6.8- | - |
| chr2 | 9977587  | 9977631  | CSAR_peak_ | 10.82,6.81     | - |
| chr2 | 9977727  | 9977804  | CSAR_peak_ | 7.27,6.21      | - |
| chr2 | 9977846  | 9977940  | CSAR_peak_ | 7.92,24.21     | - |
| chr2 | 9989179  | 9989233  | CSAR_peak_ | 7.27,7.27      | - |
| chr2 | 9990153  | 9990188  | CSAR_peak_ | 6.95           | - |
| chr2 | 9990275  | 9990362  | CSAR_peak_ | 19.36,8.39     | - |
| chr2 | 9990452  | 9990489  | CSAR_peak_ | 7.27           | - |
| chr2 | 9990626  | 9990704  | CSAR_peak_ | 14.88          | - |
| chr2 | 9990865  | 9990946  | CSAR_peak_ | 9.58,9.58      | - |
| chr2 | 9991271  | 9991333  | CSAR_peak_ | 11.03          | - |
| chr2 | 9991508  | 9991572  | CSAR_peak_ | 7.27,8.39      | - |
| chr2 | 10042009 | 10042084 | CSAR_peak_ | 6.21           | - |
| chr2 | 10042383 | 10042438 | CSAR_peak_ | 14.88          | - |
| chr2 | 10042762 | 10042825 | CSAR_peak_ | 8.09           | - |
| chr2 | 10043263 | 10043338 | CSAR_peak_ | 14.76,12.13    | - |
| chr2 | 10043360 | 10043461 | CSAR_peak_ | 7.92,7.58      | - |
| chr2 | 10063469 | 10063538 | CSAR_peak_ | 6.81           | - |
| chr2 | 10124217 | 10124244 | CSAR_peak_ | 8.39           | - |
| chr2 | 10126905 | 10126945 | CSAR_peak_ | 7.27           | - |
| chr2 | 10127046 | 10127094 | CSAR_peak_ | 8.09           | - |
| chr2 | 10135771 | 10135817 | CSAR_peak_ | 14.08,7.27     | - |
| chr2 | 10135819 | 10135895 | CSAR_peak_ | 19.36,21.35    | - |
| chr2 | 10135989 | 10136174 | CSAR_peak_ | 17.88,12.54    | - |

|      |          |          |             |             |   |
|------|----------|----------|-------------|-------------|---|
| chr2 | 10136589 | 10136644 | CSAR_peak_  | 6.21        | - |
| chr2 | 10136665 | 10136709 | CSAR_peak_  | 7.27        | - |
| chr2 | 10136914 | 10137063 | CSAR_peak_  | 26.37,8.95  | - |
| chr2 | 10155303 | 10155383 | CSAR_peak_! | 9.58        | - |
| chr2 | 10201900 | 10201987 | CSAR_peak_  | 17.82,16.11 | - |
| chr2 | 10202133 | 10202219 | CSAR_peak_! | 19.36       | - |
| chr2 | 10202845 | 10202923 | CSAR_peak_! | 12.13,9.58  | - |
| chr2 | 10203466 | 10203511 | CSAR_peak_! | 6.03        | - |
| chr2 | 10203918 | 10204035 | CSAR_peak_  | 10.02,7.27  | - |
| chr2 | 10204274 | 10204341 | CSAR_peak_! | 7.27,13.44  | - |
| chr2 | 10226436 | 10226485 | CSAR_peak_  | 7           | - |
| chr2 | 10227703 | 10227761 | CSAR_peak_  | 7.27        | - |
| chr2 | 10267215 | 10267278 | CSAR_peak_  | 11.38       | - |
| chr2 | 10267315 | 10267358 | CSAR_peak_! | 7.27        | - |
| chr2 | 10286945 | 10287025 | CSAR_peak_! | 12.13,9.58  | - |
| chr2 | 10287028 | 10287051 | CSAR_peak_  | 6.03        | - |
| chr2 | 10287114 | 10287149 | CSAR_peak_! | 9.13,10.53  | - |
| chr2 | 10287250 | 10287273 | CSAR_peak_  | 6.21,8.39   | - |
| chr2 | 10287320 | 10287430 | CSAR_peak_! | 9.55        | - |
| chr2 | 10287689 | 10287776 | CSAR_peak_  | 10.31,9.58  | - |
| chr2 | 10287869 | 10287947 | CSAR_peak_! | 17.51,17.28 | - |
| chr2 | 10288124 | 10288151 | CSAR_peak_  | 7.26        | - |
| chr2 | 10288254 | 10288283 | CSAR_peak_  | 8.13        | - |
| chr2 | 10288686 | 10288716 | CSAR_peak_! | 8.95        | - |
| chr2 | 10288993 | 10289032 | CSAR_peak_  | 9.58        | - |
| chr2 | 10320405 | 10320445 | CSAR_peak_! | 9.77        | - |
| chr2 | 10321768 | 10321822 | CSAR_peak_! | 7.27        | - |
| chr2 | 10327221 | 10327274 | CSAR_peak_  | 6.21        | - |
| chr2 | 10327530 | 10327612 | CSAR_peak_  | 28.34,7.27  | - |
| chr2 | 10327973 | 10328094 | CSAR_peak_! | 22.74,33.03 | - |
| chr2 | 10328414 | 10328481 | CSAR_peak_  | 10.83       | - |
| chr2 | 10329058 | 10329102 | CSAR_peak_  | 12.13       | - |
| chr2 | 10329178 | 10329258 | CSAR_peak_  | 6.45,17.82  | - |
| chr2 | 10329457 | 10329501 | CSAR_peak_! | 14.88,9.77  | - |
| chr2 | 10329561 | 10329625 | CSAR_peak_  | 7.27,12.13  | - |
| chr2 | 10345850 | 10345901 | CSAR_peak_! | 7.27,7.73   | - |
| chr2 | 10347316 | 10347432 | CSAR_peak_! | 19.8,20.17  | - |
| chr2 | 10347583 | 10347606 | CSAR_peak_! | 7.27        | - |
| chr2 | 10347710 | 10347757 | CSAR_peak_  | 9.58,12.13  | - |
| chr2 | 10347843 | 10347921 | CSAR_peak_! | 11.96,10.83 | - |
| chr2 | 10347927 | 10348064 | CSAR_peak_! | 19.36,19.36 | - |
| chr2 | 10348075 | 10348152 | CSAR_peak_  | 6.21,13.48  | - |

|      |          |          |             |               |   |
|------|----------|----------|-------------|---------------|---|
| chr2 | 10348857 | 10349085 | CSAR_peak_! | 6.85,14.88    | - |
| chr2 | 10349132 | 10349207 | CSAR_peak_! | 12.17         | - |
| chr2 | 10349307 | 10349427 | CSAR_peak_! | 22.56         | - |
| chr2 | 10349499 | 10349539 | CSAR_peak_! | 8.39          | - |
| chr2 | 10349636 | 10349689 | CSAR_peak_! | 17.82         | - |
| chr2 | 10363585 | 10363652 | CSAR_peak_! | 7.92,9.58     | - |
| chr2 | 10364060 | 10364175 | CSAR_peak_! | 17.82,6.21    | - |
| chr2 | 10365180 | 10365247 | CSAR_peak_! | 9.58,17.82    | - |
| chr2 | 10365397 | 10365455 | CSAR_peak_! | 6.21          | - |
| chr2 | 10365595 | 10365656 | CSAR_peak_! | 14.88         | - |
| chr2 | 10366046 | 10366138 | CSAR_peak_! | 7.27,12.74    | - |
| chr2 | 10384327 | 10384361 | CSAR_peak_! | 7.27          | - |
| chr2 | 10401278 | 10401319 | CSAR_peak_! | 7.27          | - |
| chr2 | 10422052 | 10422170 | CSAR_peak_! | 7.27          | - |
| chr2 | 10424205 | 10424266 | CSAR_peak_! | 8.39          | - |
| chr2 | 10424313 | 10424371 | CSAR_peak_! | 8.39          | - |
| chr2 | 10424467 | 10424595 | CSAR_peak_! | 18.85,24.21   | - |
| chr2 | 10425199 | 10425241 | CSAR_peak_! | 7.27          | - |
| chr2 | 10425342 | 10425408 | CSAR_peak_! | 21.94,10.31   | - |
| chr2 | 10425467 | 10425609 | CSAR_peak_! | 7.58,13.48    | - |
| chr2 | 10426238 | 10426323 | CSAR_peak_! | 10.95,8.13,9. | - |
| chr2 | 10426572 | 10426589 | CSAR_peak_! | 7.27          | - |
| chr2 | 10426762 | 10426821 | CSAR_peak_! | 19.36,6.21    | - |
| chr2 | 10426865 | 10426909 | CSAR_peak_! | 7.27          | - |
| chr2 | 10427008 | 10427092 | CSAR_peak_! | 7.27          | - |
| chr2 | 10427128 | 10427332 | CSAR_peak_! | 17.82,10.83   | - |
| chr2 | 10427469 | 10427529 | CSAR_peak_! | 24.21,12.17   | - |
| chr2 | 10427703 | 10427799 | CSAR_peak_! | 16.33,10.31   | - |
| chr2 | 10427919 | 10427996 | CSAR_peak_! | 17.51         | - |
| chr2 | 10428112 | 10428193 | CSAR_peak_! | 10.62,12.27   | - |
| chr2 | 10428418 | 10428557 | CSAR_peak_! | 20.83,10.82,- | - |
| chr2 | 10428729 | 10428783 | CSAR_peak_! | 11.38         | - |
| chr2 | 10428837 | 10429016 | CSAR_peak_! | 17.3,25.21    | - |
| chr2 | 10429055 | 10429153 | CSAR_peak_! | 20.05,16.33   | - |
| chr2 | 10437953 | 10438007 | CSAR_peak_! | 13.48         | - |
| chr2 | 10484084 | 10484183 | CSAR_peak_! | 12.13         | - |
| chr2 | 10501467 | 10501516 | CSAR_peak_! | 9.58          | - |
| chr2 | 10501736 | 10501797 | CSAR_peak_! | 12.13         | - |
| chr2 | 10541887 | 10541955 | CSAR_peak_! | 10.95         | - |
| chr2 | 10542184 | 10542257 | CSAR_peak_! | 7.73,9.58     | - |
| chr2 | 10542768 | 10542838 | CSAR_peak_! | 13.44,7.27    | - |
| chr2 | 10542856 | 10542894 | CSAR_peak_! | 7.27          | - |



|      |          |          |            |                   |   |
|------|----------|----------|------------|-------------------|---|
| chr2 | 10542922 | 10542995 | CSAR_peak_ | 19.36,55.05       | - |
| chr2 | 10543090 | 10543227 | CSAR_peak_ | 21.56,6.45,19.36  | - |
| chr2 | 10543386 | 10543461 | CSAR_peak_ | 11.38             | - |
| chr2 | 10543856 | 10543905 | CSAR_peak_ | 7.27,9.58         | - |
| chr2 | 10544419 | 10544452 | CSAR_peak_ | 6.21              | - |
| chr2 | 10544457 | 10544600 | CSAR_peak_ | 17.37,16.33       | - |
| chr2 | 10544645 | 10544780 | CSAR_peak_ | 25.91,14.76       | - |
| chr2 | 10544843 | 10544995 | CSAR_peak_ | 21.35,50.81       | - |
| chr2 | 10545041 | 10545112 | CSAR_peak_ | 7.92,14.88        | - |
| chr2 | 10545211 | 10545417 | CSAR_peak_ | 31.73,14.88,19.36 | - |
| chr2 | 10545434 | 10545712 | CSAR_peak_ | 13.48,38.71,19.36 | - |
| chr2 | 10545763 | 10545868 | CSAR_peak_ | 14.88,9.58        | - |
| chr2 | 10545929 | 10545980 | CSAR_peak_ | 14.76             | - |
| chr2 | 10546016 | 10546094 | CSAR_peak_ | 13.48             | - |
| chr2 | 10546182 | 10546334 | CSAR_peak_ | 24.21,10.83,19.36 | - |
| chr2 | 10547095 | 10547142 | CSAR_peak_ | 7.27              | - |
| chr2 | 10547265 | 10547305 | CSAR_peak_ | 6.21              | - |
| chr2 | 10547462 | 10547560 | CSAR_peak_ | 14.88,9.77        | - |
| chr2 | 10547808 | 10547917 | CSAR_peak_ | 13.44,11.96       | - |
| chr2 | 10548002 | 10548030 | CSAR_peak_ | 14.88             | - |
| chr2 | 10548288 | 10548339 | CSAR_peak_ | 12.13             | - |
| chr2 | 10548447 | 10548487 | CSAR_peak_ | 9.77,8.39         | - |
| chr2 | 10549139 | 10549176 | CSAR_peak_ | 6.21              | - |
| chr2 | 10585132 | 10585175 | CSAR_peak_ | 6.21              | - |
| chr2 | 10663789 | 10663834 | CSAR_peak_ | 8.39              | - |
| chr2 | 10664119 | 10664143 | CSAR_peak_ | 7.27              | - |
| chr2 | 10664237 | 10664327 | CSAR_peak_ | 9.41,8.14         | - |
| chr2 | 10664723 | 10664786 | CSAR_peak_ | 8.14,16.33,19.36  | - |
| chr2 | 10664823 | 10664854 | CSAR_peak_ | 12.17,6.85        | - |
| chr2 | 10665103 | 10665167 | CSAR_peak_ | 9.48,6.03         | - |
| chr2 | 10665250 | 10665343 | CSAR_peak_ | 14.88,6.21        | - |
| chr2 | 10665346 | 10665444 | CSAR_peak_ | 19.96,16.33       | - |
| chr2 | 10665606 | 10665685 | CSAR_peak_ | 6.21,7.27         | - |
| chr2 | 10674035 | 10674087 | CSAR_peak_ | 6.21,7.27         | - |
| chr2 | 10675032 | 10675075 | CSAR_peak_ | 6.21              | - |
| chr2 | 10725968 | 10726070 | CSAR_peak_ | 6.21,12.13        | - |
| chr2 | 10782477 | 10782550 | CSAR_peak_ | 8.39,6.21         | - |
| chr2 | 10782808 | 10782859 | CSAR_peak_ | 9.58              | - |
| chr2 | 10782905 | 10783033 | CSAR_peak_ | 10.02,9.58        | - |
| chr2 | 10787020 | 10787094 | CSAR_peak_ | 9.77,6.21         | - |
| chr2 | 10787171 | 10787213 | CSAR_peak_ | 7.27              | - |
| chr2 | 10787223 | 10787271 | CSAR_peak_ | 7.27              | - |

|      |          |          |             |               |   |
|------|----------|----------|-------------|---------------|---|
| chr2 | 10829619 | 10829660 | CSAR_peak_! | 7.27          | - |
| chr2 | 10830010 | 10830742 | CSAR_peak_! | 45.7,6.44,26. | - |
| chr2 | 10830796 | 10831593 | CSAR_peak_! | 39.16,50.93,  | - |
| chr2 | 10833529 | 10833583 | CSAR_peak_! | 8.65          | - |
| chr2 | 10833656 | 10833763 | CSAR_peak_! | 10.31,20.94   | - |
| chr2 | 10834020 | 10834059 | CSAR_peak_! | 6.57,6.21     | - |
| chr2 | 10834159 | 10834347 | CSAR_peak_! | 7.89,13.51,8. | - |
| chr2 | 10834427 | 10834467 | CSAR_peak_! | 9.77          | - |
| chr2 | 10834525 | 10834616 | CSAR_peak_! | 10.83         | - |
| chr2 | 10834931 | 10835002 | CSAR_peak_! | 14.88,13.48   | - |
| chr2 | 10835082 | 10835169 | CSAR_peak_! | 9.61,10.62    | - |
| chr2 | 10835339 | 10835405 | CSAR_peak_! | 7.27,9.58     | - |
| chr2 | 10846801 | 10846866 | CSAR_peak_! | 14.88,8.39    | - |
| chr2 | 10847249 | 10847321 | CSAR_peak_! | 9.58,8.65     | - |
| chr2 | 10847396 | 10847432 | CSAR_peak_! | 7.27          | - |
| chr2 | 10847592 | 10847678 | CSAR_peak_! | 7.58          | - |
| chr2 | 10847894 | 10847950 | CSAR_peak_! | 11.66,6.44    | - |
| chr2 | 10847970 | 10848058 | CSAR_peak_! | 13.48         | - |
| chr2 | 10848429 | 10848504 | CSAR_peak_! | 7.29,8.95     | - |
| chr2 | 10848807 | 10848900 | CSAR_peak_! | 11.47,8.65    | - |
| chr2 | 10848948 | 10849011 | CSAR_peak_! | 16.33         | - |
| chr2 | 10849022 | 10849081 | CSAR_peak_! | 6.03          | - |
| chr2 | 10849155 | 10849203 | CSAR_peak_! | 7.27          | - |
| chr2 | 10849295 | 10849524 | CSAR_peak_! | 19.68,17.28   | - |
| chr2 | 10849629 | 10849671 | CSAR_peak_! | 8.65          | - |
| chr2 | 10849786 | 10849927 | CSAR_peak_! | 19.36,17.37   | - |
| chr2 | 10849946 | 10850038 | CSAR_peak_! | 8.39,6.95     | - |
| chr2 | 10850090 | 10850187 | CSAR_peak_! | 14.59,29.2    | - |
| chr2 | 10850241 | 10850305 | CSAR_peak_! | 24.21,8.39    | - |
| chr2 | 10850344 | 10850429 | CSAR_peak_! | 15.2,13.48    | - |
| chr2 | 10901734 | 10901774 | CSAR_peak_! | 6.21          | - |
| chr2 | 10916710 | 10916758 | CSAR_peak_! | 7.27          | - |
| chr2 | 10917737 | 10917781 | CSAR_peak_! | 7.27          | - |
| chr2 | 10918721 | 10918763 | CSAR_peak_! | 9.58          | - |
| chr2 | 10922533 | 10922586 | CSAR_peak_! | 9.58          | - |
| chr2 | 10925152 | 10925207 | CSAR_peak_! | 8.39,10.02    | - |
| chr2 | 10929227 | 10929291 | CSAR_peak_! | 6.21          | - |
| chr2 | 10930516 | 10930561 | CSAR_peak_! | 6.21          | - |
| chr2 | 10960369 | 10960449 | CSAR_peak_! | 10.83         | - |
| chr2 | 10962153 | 10962260 | CSAR_peak_! | 8.39,7.92     | - |
| chr2 | 10963164 | 10963216 | CSAR_peak_! | 7.27          | - |
| chr2 | 10964185 | 10964230 | CSAR_peak_! | 17.51,13.44,! | - |

|      |          |          |             |                |   |
|------|----------|----------|-------------|----------------|---|
| chr2 | 10964370 | 10964446 | CSAR_peak_  | 12.13,8.39     | - |
| chr2 | 10968965 | 10969001 | CSAR_peak_! | 7.27           | - |
| chr2 | 10969003 | 10969079 | CSAR_peak_! | 12.13,7.27     | - |
| chr2 | 10969366 | 10969401 | CSAR_peak_! | 10.83          | - |
| chr2 | 10970061 | 10970129 | CSAR_peak_! | 6.21,14.88     | - |
| chr2 | 10970625 | 10970734 | CSAR_peak_! | 17.82,9.27     | - |
| chr2 | 10972123 | 10972162 | CSAR_peak_! | 10.83          | - |
| chr2 | 10972228 | 10972303 | CSAR_peak_! | 14.88          | - |
| chr2 | 10972321 | 10972371 | CSAR_peak_! | 7.27           | - |
| chr2 | 10974702 | 10974752 | CSAR_peak_! | 9.58           | - |
| chr2 | 10985014 | 10985074 | CSAR_peak_! | 10.31,6.95     | - |
| chr2 | 10985284 | 10985343 | CSAR_peak_! | 12.17,8.39     | - |
| chr2 | 10985380 | 10985436 | CSAR_peak_! | 9.61,9.77      | - |
| chr2 | 10985709 | 10985718 | CSAR_peak_! | 7.27           | - |
| chr2 | 10985805 | 10985896 | CSAR_peak_! | 25.91,8.14,6.- | - |
| chr2 | 10986011 | 10986063 | CSAR_peak_! | 9.58           | - |
| chr2 | 10986127 | 10986182 | CSAR_peak_! | 9.58           | - |
| chr2 | 10986280 | 10986345 | CSAR_peak_! | 8.39           | - |
| chr2 | 10986592 | 10986640 | CSAR_peak_! | 8.39           | - |
| chr2 | 10986855 | 10986930 | CSAR_peak_! | 7.27,14.88     | - |
| chr2 | 10987029 | 10987096 | CSAR_peak_! | 13.66,6.87     | - |
| chr2 | 10987173 | 10987268 | CSAR_peak_! | 11.32          | - |
| chr2 | 10987353 | 10987398 | CSAR_peak_! | 17.82,7.58     | - |
| chr2 | 10987666 | 10987749 | CSAR_peak_! | 7.27           | - |
| chr2 | 10987895 | 10987937 | CSAR_peak_! | 6.03           | - |
| chr2 | 10988051 | 10988108 | CSAR_peak_! | 6.45,6.74      | - |
| chr2 | 10988109 | 10988178 | CSAR_peak_! | 10.57,8.13     | - |
| chr2 | 10988389 | 10988410 | CSAR_peak_! | 6.57           | - |
| chr2 | 10988639 | 10988688 | CSAR_peak_! | 12.13,6.21     | - |
| chr2 | 11007028 | 11007075 | CSAR_peak_! | 8.39           | - |
| chr2 | 11007285 | 11007363 | CSAR_peak_! | 12.17,9.58     | - |
| chr2 | 11007459 | 11007535 | CSAR_peak_! | 6.21,8.28,8.6- | - |
| chr2 | 11007864 | 11007936 | CSAR_peak_! | 20.43,5.86,2-  | - |
| chr2 | 11008003 | 11008143 | CSAR_peak_! | 10.83,12.13,-  | - |
| chr2 | 11025680 | 11025738 | CSAR_peak_! | 7.58           | - |
| chr2 | 11026184 | 11026241 | CSAR_peak_! | 14.22          | - |
| chr2 | 11026620 | 11026774 | CSAR_peak_! | 10.02,22.74    | - |
| chr2 | 11026799 | 11026814 | CSAR_peak_! | 6.21,8.39      | - |
| chr2 | 11027354 | 11027405 | CSAR_peak_! | 6.02           | - |
| chr2 | 11027572 | 11027772 | CSAR_peak_! | 9.77,34.26,5.- | - |
| chr2 | 11027897 | 11027957 | CSAR_peak_! | 18.73,6.94     | - |
| chr2 | 11028562 | 11028625 | CSAR_peak_! | 7.27,8.39      | - |

|      |          |          |             |                  |   |
|------|----------|----------|-------------|------------------|---|
| chr2 | 11029386 | 11029449 | CSAR_peak_! | 17.82            | - |
| chr2 | 11029690 | 11029751 | CSAR_peak_! | 13.48            | - |
| chr2 | 11030126 | 11030204 | CSAR_peak_! | 7.27             | - |
| chr2 | 11030303 | 11030382 | CSAR_peak_! | 6.1              | - |
| chr2 | 11050885 | 11050936 | CSAR_peak_! | 13.48            | - |
| chr2 | 11051076 | 11051136 | CSAR_peak_! | 10.83            | - |
| chr2 | 11054873 | 11054934 | CSAR_peak_! | 12.13            | - |
| chr2 | 11071975 | 11072049 | CSAR_peak_! | 14.88,7.58       | - |
| chr2 | 11072372 | 11072453 | CSAR_peak_! | 9.58             | - |
| chr2 | 11072806 | 11072850 | CSAR_peak_! | 14.88,10.83      | - |
| chr2 | 11073218 | 11073286 | CSAR_peak_! | 7.27,10.83       | - |
| chr2 | 11073339 | 11073422 | CSAR_peak_! | 9.77             | - |
| chr2 | 11074316 | 11074473 | CSAR_peak_! | 14.88,16.36,     | - |
| chr2 | 11074558 | 11074620 | CSAR_peak_! | 6.71,8.09        | - |
| chr2 | 11074623 | 11074654 | CSAR_peak_! | 6.57             | - |
| chr2 | 11074702 | 11074797 | CSAR_peak_! | 11.38,9.77,11.38 | - |
| chr2 | 11074893 | 11074931 | CSAR_peak_! | 7.27             | - |
| chr2 | 11075062 | 11075177 | CSAR_peak_! | 10.83,8.39       | - |
| chr2 | 11075283 | 11075326 | CSAR_peak_! | 7.27             | - |
| chr2 | 11092196 | 11092230 | CSAR_peak_! | 7.27             | - |
| chr2 | 11109389 | 11109439 | CSAR_peak_! | 7.73             | - |
| chr2 | 11109715 | 11109762 | CSAR_peak_! | 7.27             | - |
| chr2 | 11110122 | 11110170 | CSAR_peak_! | 16.33,7.27       | - |
| chr2 | 11110286 | 11110368 | CSAR_peak_! | 12.13,13.48      | - |
| chr2 | 11110834 | 11110897 | CSAR_peak_! | 7.92,19.36       | - |
| chr2 | 11111007 | 11111043 | CSAR_peak_! | 9.77             | - |
| chr2 | 11111535 | 11111590 | CSAR_peak_! | 12.17            | - |
| chr2 | 11111826 | 11111879 | CSAR_peak_! | 12.13            | - |
| chr2 | 11111970 | 11112037 | CSAR_peak_! | 7.58             | - |
| chr2 | 11112253 | 11112304 | CSAR_peak_! | 9.77,9.77        | - |
| chr2 | 11112778 | 11112884 | CSAR_peak_! | 10.83,7.27       | - |
| chr2 | 11112930 | 11113028 | CSAR_peak_! | 22.56,5.95       | - |
| chr2 | 11132282 | 11132326 | CSAR_peak_! | 6.03             | - |
| chr2 | 11132367 | 11132425 | CSAR_peak_! | 7.27             | - |
| chr2 | 11133108 | 11133218 | CSAR_peak_! | 8.95             | - |
| chr2 | 11133863 | 11133903 | CSAR_peak_! | 6.57,6.44        | - |
| chr2 | 11134337 | 11134453 | CSAR_peak_! | 13.48            | - |
| chr2 | 11135109 | 11135162 | CSAR_peak_! | 6.87             | - |
| chr2 | 11147702 | 11147740 | CSAR_peak_! | 6.21             | - |
| chr2 | 11148041 | 11148106 | CSAR_peak_! | 17.82            | - |
| chr2 | 11148285 | 11148309 | CSAR_peak_! | 12.13,12.13      | - |
| chr2 | 11148381 | 11148459 | CSAR_peak_! | 25.91,21.94      | - |

|      |          |          |             |                |
|------|----------|----------|-------------|----------------|
| chr2 | 11148573 | 11148824 | CSAR_peak_  | 12.17,12.59,-  |
| chr2 | 11148888 | 11148998 | CSAR_peak_  | 25.62,7.78,1:- |
| chr2 | 11149064 | 11149116 | CSAR_peak_! | 7.58,13.44 -   |
| chr2 | 11149255 | 11149322 | CSAR_peak_! | 16.36,10.83 -  |
| chr2 | 11149324 | 11149504 | CSAR_peak_! | 7.73,20.21,5.- |
| chr2 | 11149583 | 11149665 | CSAR_peak_! | 24.52,9.94 -   |
| chr2 | 11149733 | 11149914 | CSAR_peak_! | 9.27,22.06,7.- |
| chr2 | 11150087 | 11150135 | CSAR_peak_! | 9.77 -         |
| chr2 | 11150158 | 11150219 | CSAR_peak_! | 9.58,5.86,9.5- |
| chr2 | 11150402 | 11150434 | CSAR_peak_! | 12.13 -        |
| chr2 | 11167575 | 11167633 | CSAR_peak_! | 6.21,8.39 -    |
| chr2 | 11167725 | 11167735 | CSAR_peak_! | 8.39 -         |
| chr2 | 11171386 | 11171437 | CSAR_peak_! | 10.02,9.97 -   |
| chr2 | 11171492 | 11171580 | CSAR_peak_! | 14.88 -        |
| chr2 | 11171627 | 11171690 | CSAR_peak_! | 6.95 -         |
| chr2 | 11171732 | 11171804 | CSAR_peak_! | 9.58,12.17 -   |
| chr2 | 11171839 | 11171985 | CSAR_peak_! | 16.33,13.48 -  |
| chr2 | 11172034 | 11172134 | CSAR_peak_! | 8.39,14.76,9.- |
| chr2 | 11188048 | 11188062 | CSAR_peak_! | 6.21 -         |
| chr2 | 11188401 | 11188469 | CSAR_peak_! | 13.48,22.52 -  |
| chr2 | 11188581 | 11188660 | CSAR_peak_! | 16.11,14.76 -  |
| chr2 | 11188663 | 11188722 | CSAR_peak_! | 23.03,8.95 -   |
| chr2 | 11189056 | 11189165 | CSAR_peak_! | 30.35,18.73 -  |
| chr2 | 11189278 | 11189320 | CSAR_peak_! | 8.53 -         |
| chr2 | 11189331 | 11189445 | CSAR_peak_! | 14.88,10.94 -  |
| chr2 | 11190729 | 11190785 | CSAR_peak_! | 14.88,12.13 -  |
| chr2 | 11191243 | 11191291 | CSAR_peak_! | 8.39 -         |
| chr2 | 11217686 | 11217783 | CSAR_peak_! | 12.13 -        |
| chr2 | 11219181 | 11219224 | CSAR_peak_! | 7.27 -         |
| chr2 | 11219393 | 11219400 | CSAR_peak_! | 7.27 -         |
| chr2 | 11219482 | 11219568 | CSAR_peak_! | 11.63,24.52 -  |
| chr2 | 11219941 | 11219989 | CSAR_peak_! | 6.21 -         |
| chr2 | 11243799 | 11243873 | CSAR_peak_! | 6.21 -         |
| chr2 | 11244732 | 11244770 | CSAR_peak_! | 6.21 -         |
| chr2 | 11255319 | 11255365 | CSAR_peak_! | 9.58 -         |
| chr2 | 11255419 | 11255490 | CSAR_peak_! | 6.21,10.02 -   |
| chr2 | 11257377 | 11257434 | CSAR_peak_! | 9.58 -         |
| chr2 | 11258298 | 11258356 | CSAR_peak_! | 7.27,8.39 -    |
| chr2 | 11283142 | 11283212 | CSAR_peak_! | 7.27 -         |
| chr2 | 11283946 | 11284015 | CSAR_peak_! | 24.21 -        |
| chr2 | 11287869 | 11287971 | CSAR_peak_! | 14.88,17.82 -  |
| chr2 | 11289976 | 11290042 | CSAR_peak_! | 12.13,9.77 -   |

|      |          |          |             |             |   |
|------|----------|----------|-------------|-------------|---|
| chr2 | 11291625 | 11291714 | CSAR_peak_! | 12.13,13.48 | - |
| chr2 | 11292944 | 11292996 | CSAR_peak_! | 10.83       | - |
| chr2 | 11293195 | 11293253 | CSAR_peak_! | 6.21        | - |
| chr2 | 11293437 | 11293492 | CSAR_peak_! | 7.27        | - |
| chr2 | 11294087 | 11294133 | CSAR_peak_! | 6.95        | - |
| chr2 | 11294457 | 11294528 | CSAR_peak_! | 6.57        | - |
| chr2 | 11295433 | 11295506 | CSAR_peak_! | 9.58,6.45   | - |
| chr2 | 11310981 | 11311025 | CSAR_peak_! | 7.27        | - |
| chr2 | 11311337 | 11311392 | CSAR_peak_! | 8.39,9.58   | - |
| chr2 | 11311462 | 11311496 | CSAR_peak_! | 6.21        | - |
| chr2 | 11312244 | 11312308 | CSAR_peak_! | 9.77,8.02   | - |
| chr2 | 11312798 | 11312876 | CSAR_peak_! | 8.39,10.82  | - |
| chr2 | 11313898 | 11313962 | CSAR_peak_! | 9.77        | - |
| chr2 | 11314238 | 11314297 | CSAR_peak_! | 19.36,11.38 | - |
| chr2 | 11330259 | 11330404 | CSAR_peak_! | 9.58,9.58   | - |
| chr2 | 11332136 | 11332235 | CSAR_peak_! | 25.91,6.85  | - |
| chr2 | 11332262 | 11332323 | CSAR_peak_! | 9.77,8.28   | - |
| chr2 | 11332446 | 11332583 | CSAR_peak_! | 16.33,6.44  | - |
| chr2 | 11332589 | 11332711 | CSAR_peak_! | 6.21,7.27   | - |
| chr2 | 11333061 | 11333110 | CSAR_peak_! | 16.25       | - |
| chr2 | 11333191 | 11333256 | CSAR_peak_! | 13.48       | - |
| chr2 | 11333647 | 11333700 | CSAR_peak_! | 9.77,6.11   | - |
| chr2 | 11333782 | 11333862 | CSAR_peak_! | 11.38,6.78  | - |
| chr2 | 11334095 | 11334138 | CSAR_peak_! | 7.27        | - |
| chr2 | 11334202 | 11334216 | CSAR_peak_! | 6.21        | - |
| chr2 | 11334297 | 11334376 | CSAR_peak_! | 9.58,7.27   | - |
| chr2 | 11334852 | 11334894 | CSAR_peak_! | 7.27        | - |
| chr2 | 11336396 | 11336429 | CSAR_peak_! | 9.58        | - |
| chr2 | 11347615 | 11347660 | CSAR_peak_! | 7.27,7.27   | - |
| chr2 | 11348230 | 11348317 | CSAR_peak_! | 21.22,19.93 | - |
| chr2 | 11348378 | 11348428 | CSAR_peak_! | 19.36,6.57  | - |
| chr2 | 11348594 | 11348668 | CSAR_peak_! | 8.39        | - |
| chr2 | 11350726 | 11350795 | CSAR_peak_! | 9.58,7.2    | - |
| chr2 | 11350830 | 11350871 | CSAR_peak_! | 7.92,6.21   | - |
| chr2 | 11350914 | 11350957 | CSAR_peak_! | 12.17       | - |
| chr2 | 11404391 | 11404458 | CSAR_peak_! | 7.68,14.88  | - |
| chr2 | 11404485 | 11404514 | CSAR_peak_! | 6.44        | - |
| chr2 | 11404663 | 11404716 | CSAR_peak_! | 8.65        | - |
| chr2 | 11404857 | 11404916 | CSAR_peak_! | 9.58,8.39   | - |
| chr2 | 11405149 | 11405203 | CSAR_peak_! | 8.28        | - |
| chr2 | 11405522 | 11405581 | CSAR_peak_! | 6.03        | - |
| chr2 | 11405796 | 11405842 | CSAR_peak_! | 9.77        | - |

|      |          |          |             |                |   |
|------|----------|----------|-------------|----------------|---|
| chr2 | 11406139 | 11406266 | CSAR_peak_! | 7.27,5.86,14.- | - |
| chr2 | 11407020 | 11407068 | CSAR_peak_! | 7.27,10.33     | - |
| chr2 | 11429411 | 11429458 | CSAR_peak_! | 6.21           | - |
| chr2 | 11429879 | 11429925 | CSAR_peak_! | 7.27           | - |
| chr2 | 11430473 | 11430554 | CSAR_peak_! | 10.7           | - |
| chr2 | 11430719 | 11430736 | CSAR_peak_! | 7.58           | - |
| chr2 | 11430779 | 11430806 | CSAR_peak_! | 6.21           | - |
| chr2 | 11431174 | 11431215 | CSAR_peak_! | 9.58           | - |
| chr2 | 11431451 | 11431535 | CSAR_peak_! | 19.36,12.13    | - |
| chr2 | 11431719 | 11431786 | CSAR_peak_! | 25.91,17.68    | - |
| chr2 | 11431846 | 11431912 | CSAR_peak_! | 16.33,13.48    | - |
| chr2 | 11432031 | 11432172 | CSAR_peak_! | 6.53,8.53      | - |
| chr2 | 11432346 | 11432411 | CSAR_peak_! | 7.27,7.27      | - |
| chr2 | 11434147 | 11434210 | CSAR_peak_! | 7.27,8.39      | - |
| chr2 | 11462196 | 11462257 | CSAR_peak_! | 7.27           | - |
| chr2 | 11462447 | 11462474 | CSAR_peak_! | 10.95          | - |
| chr2 | 11462564 | 11462620 | CSAR_peak_! | 12.13,7.58     | - |
| chr2 | 11462625 | 11462633 | CSAR_peak_! | 13.48          | - |
| chr2 | 11462700 | 11462757 | CSAR_peak_! | 13.48,13.92,-  | - |
| chr2 | 11462874 | 11462922 | CSAR_peak_! | 6.21           | - |
| chr2 | 11463108 | 11463157 | CSAR_peak_! | 10.83          | - |
| chr2 | 11463862 | 11463926 | CSAR_peak_! | 7.27           | - |
| chr2 | 11464291 | 11464340 | CSAR_peak_! | 9.58,7.27      | - |
| chr2 | 11464718 | 11464893 | CSAR_peak_! | 9.58,11.14     | - |
| chr2 | 11465080 | 11465142 | CSAR_peak_! | 8.28           | - |
| chr2 | 11465388 | 11465503 | CSAR_peak_! | 9.58           | - |
| chr2 | 11465556 | 11465607 | CSAR_peak_! | 10.83          | - |
| chr2 | 11466089 | 11466162 | CSAR_peak_! | 17.51          | - |
| chr2 | 11466192 | 11466253 | CSAR_peak_! | 7.27           | - |
| chr2 | 11466539 | 11466646 | CSAR_peak_! | 17.37,16.33    | - |
| chr2 | 11467201 | 11467292 | CSAR_peak_! | 10.83,8.39     | - |
| chr2 | 11467352 | 11467428 | CSAR_peak_! | 12.13,9.77     | - |
| chr2 | 11467435 | 11467497 | CSAR_peak_! | 6.03           | - |
| chr2 | 11467803 | 11467874 | CSAR_peak_! | 9.61,7.34      | - |
| chr2 | 11468595 | 11468677 | CSAR_peak_! | 8.39           | - |
| chr2 | 11468874 | 11469106 | CSAR_peak_! | 7.27,24.21,3!  | - |
| chr2 | 11469405 | 11469491 | CSAR_peak_! | 23.95,22.52    | - |
| chr2 | 11469538 | 11469595 | CSAR_peak_! | 11.03          | - |
| chr2 | 11469890 | 11469991 | CSAR_peak_! | 25.91,7.58     | - |
| chr2 | 11470008 | 11470094 | CSAR_peak_! | 11.14          | - |
| chr2 | 11470102 | 11470169 | CSAR_peak_! | 12.17,7.27     | - |
| chr2 | 11470804 | 11470895 | CSAR_peak_! | 24.21,8.39     | - |

|      |          |          |             |                |   |
|------|----------|----------|-------------|----------------|---|
| chr2 | 11471017 | 11471074 | CSAR_peak_  | 6.21           | - |
| chr2 | 11471090 | 11471140 | CSAR_peak_  | 9.58           | - |
| chr2 | 11471863 | 11471934 | CSAR_peak_! | 12.13,6.03     | - |
| chr2 | 11471951 | 11472025 | CSAR_peak_  | 6.81           | - |
| chr2 | 11472229 | 11472287 | CSAR_peak_  | 9.58           | - |
| chr2 | 11472332 | 11472381 | CSAR_peak_  | 14.34          | - |
| chr2 | 11472433 | 11472464 | CSAR_peak_! | 6.1            | - |
| chr2 | 11472549 | 11472622 | CSAR_peak_! | 12.17,13.51    | - |
| chr2 | 11472737 | 11472793 | CSAR_peak_  | 6.21           | - |
| chr2 | 11472914 | 11472954 | CSAR_peak_! | 12.13          | - |
| chr2 | 11473294 | 11473338 | CSAR_peak_! | 7.27           | - |
| chr2 | 11473405 | 11473537 | CSAR_peak_  | 25.07,8.39     | - |
| chr2 | 11473601 | 11473637 | CSAR_peak_  | 7.27           | - |
| chr2 | 11475210 | 11475253 | CSAR_peak_  | 6.21,8.39      | - |
| chr2 | 11475620 | 11475651 | CSAR_peak_  | 6.21           | - |
| chr2 | 11476382 | 11476422 | CSAR_peak_  | 6.21           | - |
| chr2 | 11477417 | 11477482 | CSAR_peak_! | 7.27,9.58      | - |
| chr2 | 11510119 | 11510169 | CSAR_peak_  | 10.83          | - |
| chr2 | 11511522 | 11511586 | CSAR_peak_! | 7.27           | - |
| chr2 | 11513121 | 11513157 | CSAR_peak_  | 7.27           | - |
| chr2 | 11513230 | 11513315 | CSAR_peak_  | 7.27,9.58      | - |
| chr2 | 11514422 | 11514487 | CSAR_peak_! | 7.27,6.21      | - |
| chr2 | 11515056 | 11515137 | CSAR_peak_! | 17.82          | - |
| chr2 | 11515396 | 11515471 | CSAR_peak_! | 12.5,7.27      | - |
| chr2 | 11515533 | 11515793 | CSAR_peak_! | 14.25,7.78,1   | - |
| chr2 | 11515800 | 11515990 | CSAR_peak_  | 15.68,10.29,   | - |
| chr2 | 11516090 | 11516138 | CSAR_peak_  | 5.97           | - |
| chr2 | 11516147 | 11516211 | CSAR_peak_  | 7.53,17.51     | - |
| chr2 | 11516428 | 11516478 | CSAR_peak_! | 13.48          | - |
| chr2 | 11516674 | 11516750 | CSAR_peak_  | 20.76,49.16,   | - |
| chr2 | 11516764 | 11516814 | CSAR_peak_  | 10.83          | - |
| chr2 | 11516936 | 11516991 | CSAR_peak_! | 12.13          | - |
| chr2 | 11517109 | 11517182 | CSAR_peak_! | 6.52,15.68     | - |
| chr2 | 11517302 | 11517412 | CSAR_peak_! | 24.21,18.95    | - |
| chr2 | 11517503 | 11517564 | CSAR_peak_  | 14.88,7.92     | - |
| chr2 | 11517701 | 11517753 | CSAR_peak_  | 11.43,7.68,2(- | - |
| chr2 | 11517879 | 11517933 | CSAR_peak_! | 7.26,7.58      | - |
| chr2 | 11518032 | 11518175 | CSAR_peak_! | 30.02,26.8     | - |
| chr2 | 11528509 | 11528570 | CSAR_peak_  | 9.58           | - |
| chr2 | 11529325 | 11529365 | CSAR_peak_! | 9.58           | - |
| chr2 | 11529642 | 11529714 | CSAR_peak_  | 9.58           | - |
| chr2 | 11529971 | 11530011 | CSAR_peak_  | 7.27           | - |



|      |          |          |             |                   |   |
|------|----------|----------|-------------|-------------------|---|
| chr2 | 11530020 | 11530045 | CSAR_peak_! | 6.21              | - |
| chr2 | 11530755 | 11530798 | CSAR_peak_! | 6.21              | - |
| chr2 | 11538027 | 11538064 | CSAR_peak_! | 8.39              | - |
| chr2 | 11539959 | 11540009 | CSAR_peak_! | 20.43,12.17       | - |
| chr2 | 11567870 | 11567907 | CSAR_peak_! | 10.83             | - |
| chr2 | 11610446 | 11610455 | CSAR_peak_! | 8.39              | - |
| chr2 | 11610536 | 11610606 | CSAR_peak_! | 25.91,6.81,14.88  | - |
| chr2 | 11610979 | 11611029 | CSAR_peak_! | 7.27              | - |
| chr2 | 11611753 | 11611840 | CSAR_peak_! | 7.7,7.58          | - |
| chr2 | 11612044 | 11612110 | CSAR_peak_! | 8.39,7.27,8.39    | - |
| chr2 | 11612227 | 11612315 | CSAR_peak_! | 6.02,19.36,9.58   | - |
| chr2 | 11612463 | 11612540 | CSAR_peak_! | 7.27,14.88        | - |
| chr2 | 11612842 | 11612875 | CSAR_peak_! | 6.21              | - |
| chr2 | 11613091 | 11613124 | CSAR_peak_! | 8.39              | - |
| chr2 | 11613338 | 11613404 | CSAR_peak_! | 11.38             | - |
| chr2 | 11613908 | 11613990 | CSAR_peak_! | 10.95             | - |
| chr2 | 11614342 | 11614419 | CSAR_peak_! | 9.58              | - |
| chr2 | 11614642 | 11614721 | CSAR_peak_! | 6.21              | - |
| chr2 | 11614792 | 11614865 | CSAR_peak_! | 8.9,11.03,13.48   | - |
| chr2 | 11615103 | 11615286 | CSAR_peak_! | 19.36,12.59,14.88 | - |
| chr2 | 11615386 | 11615433 | CSAR_peak_! | 9.48,8.95         | - |
| chr2 | 11615807 | 11615881 | CSAR_peak_! | 7.58,9.41         | - |
| chr2 | 11616872 | 11616940 | CSAR_peak_! | 10.83             | - |
| chr2 | 11621307 | 11621350 | CSAR_peak_! | 6.21              | - |
| chr2 | 11621411 | 11621510 | CSAR_peak_! | 24.21,12.17       | - |
| chr2 | 11621732 | 11621822 | CSAR_peak_! | 29.14,11.45       | - |
| chr2 | 11621940 | 11621993 | CSAR_peak_! | 9.77,6.21         | - |
| chr2 | 11622089 | 11622161 | CSAR_peak_! | 7.27,6.12         | - |
| chr2 | 11622232 | 11622283 | CSAR_peak_! | 7.27              | - |
| chr2 | 11622450 | 11622512 | CSAR_peak_! | 23.03,18.95       | - |
| chr2 | 11622515 | 11622583 | CSAR_peak_! | 14.88             | - |
| chr2 | 11622604 | 11622680 | CSAR_peak_! | 24.21,12.31       | - |
| chr2 | 11622778 | 11622819 | CSAR_peak_! | 17.82,22.56       | - |
| chr2 | 11622855 | 11622912 | CSAR_peak_! | 13.48             | - |
| chr2 | 11623113 | 11623180 | CSAR_peak_! | 36.78,5.91        | - |
| chr2 | 11676388 | 11676491 | CSAR_peak_! | 7.58              | - |
| chr2 | 11676878 | 11676977 | CSAR_peak_! | 21.94,5.86,9.58   | - |
| chr2 | 11677033 | 11677095 | CSAR_peak_! | 8.65              | - |
| chr2 | 11684358 | 11684409 | CSAR_peak_! | 7.27              | - |
| chr2 | 11699777 | 11699882 | CSAR_peak_! | 9.58              | - |
| chr2 | 11700154 | 11700238 | CSAR_peak_! | 14.88             | - |
| chr2 | 11700347 | 11700402 | CSAR_peak_! | 10.94,6.81        | - |

|      |          |          |             |               |   |
|------|----------|----------|-------------|---------------|---|
| chr2 | 11700529 | 11700582 | CSAR_peak_! | 12.13,8.94,1! | - |
| chr2 | 11700791 | 11700844 | CSAR_peak_! | 13.48         | - |
| chr2 | 11701408 | 11701476 | CSAR_peak_! | 9.58,6.21     | - |
| chr2 | 11701527 | 11701613 | CSAR_peak_! | 13.48         | - |
| chr2 | 11702085 | 11702154 | CSAR_peak_! | 8.39          | - |
| chr2 | 11702155 | 11702218 | CSAR_peak_! | 9.58          | - |
| chr2 | 11702341 | 11702391 | CSAR_peak_! | 6.21          | - |
| chr2 | 11702509 | 11702567 | CSAR_peak_! | 17.82,13.48   | - |
| chr2 | 11702754 | 11702888 | CSAR_peak_! | 10.95,6.21    | - |
| chr2 | 11703021 | 11703148 | CSAR_peak_! | 14.88         | - |
| chr2 | 11703165 | 11703269 | CSAR_peak_! | 7.27          | - |
| chr2 | 11703319 | 11703423 | CSAR_peak_! | 7.27          | - |
| chr2 | 11703473 | 11703576 | CSAR_peak_! | 7.27          | - |
| chr2 | 11703641 | 11703771 | CSAR_peak_! | 14.88         | - |
| chr2 | 11704073 | 11704126 | CSAR_peak_! | 7.27          | - |
| chr2 | 11716911 | 11716964 | CSAR_peak_! | 7.27          | - |
| chr2 | 11716993 | 11717053 | CSAR_peak_! | 10.83         | - |
| chr2 | 11738263 | 11738325 | CSAR_peak_! | 11.03         | - |
| chr2 | 11744803 | 11744846 | CSAR_peak_! | 6.21          | - |
| chr2 | 11745227 | 11745569 | CSAR_peak_! | 12.59,13.69,! | - |
| chr2 | 11746337 | 11746418 | CSAR_peak_! | 12.59         | - |
| chr2 | 11747445 | 11747530 | CSAR_peak_! | 20.43,8.3     | - |
| chr2 | 11747808 | 11747888 | CSAR_peak_! | 13.48,10.83   | - |
| chr2 | 11748194 | 11748314 | CSAR_peak_! | 7.27,7.27     | - |
| chr2 | 11748315 | 11748365 | CSAR_peak_! | 8.39          | - |
| chr2 | 11748404 | 11748684 | CSAR_peak_! | 18.65,6.81,6. | - |
| chr2 | 11748699 | 11748774 | CSAR_peak_! | 12.59,5.86,1! | - |
| chr2 | 11748905 | 11748934 | CSAR_peak_! | 6.03          | - |
| chr2 | 11749115 | 11749163 | CSAR_peak_! | 5.86          | - |
| chr2 | 11749909 | 11750013 | CSAR_peak_! | 9.58          | - |
| chr2 | 11751537 | 11751610 | CSAR_peak_! | 36.78,19.36   | - |
| chr2 | 11752095 | 11752165 | CSAR_peak_! | 7.27,8.39     | - |
| chr2 | 11752290 | 11752344 | CSAR_peak_! | 7.27          | - |
| chr2 | 11752418 | 11752488 | CSAR_peak_! | 19.35,30.53   | - |
| chr2 | 11752651 | 11753038 | CSAR_peak_! | 22.56,24.97,! | - |
| chr2 | 11753318 | 11753701 | CSAR_peak_! | 47.26,33.47,! | - |
| chr2 | 11758561 | 11758599 | CSAR_peak_! | 7.27          | - |
| chr2 | 11758891 | 11758946 | CSAR_peak_! | 12.9,6.08     | - |
| chr2 | 11763898 | 11763942 | CSAR_peak_! | 6.21          | - |
| chr2 | 11764149 | 11764203 | CSAR_peak_! | 10.31,12.27   | - |
| chr2 | 11764327 | 11764369 | CSAR_peak_! | 7.27          | - |
| chr2 | 11764561 | 11764605 | CSAR_peak_! | 12.13,8.39    | - |

|      |          |          |             |                |   |
|------|----------|----------|-------------|----------------|---|
| chr2 | 11805813 | 11805853 | CSAR_peak_! | 8.39           | - |
| chr2 | 11820221 | 11820260 | CSAR_peak_! | 8.65           | - |
| chr2 | 11820366 | 11820404 | CSAR_peak_! | 7.27           | - |
| chr2 | 11864443 | 11864499 | CSAR_peak_! | 14.88          | - |
| chr2 | 11864628 | 11864887 | CSAR_peak_! | 70.09,7.27,3(- | - |
| chr2 | 11864888 | 11864959 | CSAR_peak_! | 28.34          | - |
| chr2 | 11865082 | 11865221 | CSAR_peak_! | 17.7,13.66     | - |
| chr2 | 11865300 | 11865417 | CSAR_peak_! | 14.88,7.78     | - |
| chr2 | 11865505 | 11865557 | CSAR_peak_! | 6.21,7.27      | - |
| chr2 | 11865561 | 11865616 | CSAR_peak_! | 8.28,10.94     | - |
| chr2 | 11865640 | 11865710 | CSAR_peak_! | 10.83,8.65     | - |
| chr2 | 11865725 | 11865793 | CSAR_peak_! | 5.9,8.3        | - |
| chr2 | 11865834 | 11865900 | CSAR_peak_! | 12.59,9.48     | - |
| chr2 | 11865923 | 11865979 | CSAR_peak_! | 7.27           | - |
| chr2 | 11866003 | 11866051 | CSAR_peak_! | 8.09           | - |
| chr2 | 11866193 | 11866303 | CSAR_peak_! | 14.88,9.58     | - |
| chr2 | 11866418 | 11866477 | CSAR_peak_! | 7.27,9.58,8.9- | - |
| chr2 | 11866557 | 11866618 | CSAR_peak_! | 9.58,10.02     | - |
| chr2 | 11866719 | 11866863 | CSAR_peak_! | 15.56,8.39     | - |
| chr2 | 11899483 | 11899540 | CSAR_peak_! | 6.44           | - |
| chr2 | 11899652 | 11899715 | CSAR_peak_! | 8.14           | - |
| chr2 | 11899893 | 11899957 | CSAR_peak_! | 12.13          | - |
| chr2 | 11900010 | 11900052 | CSAR_peak_! | 10.94,14.88    | - |
| chr2 | 11900183 | 11900223 | CSAR_peak_! | 13.48,10.83    | - |
| chr2 | 11900360 | 11900436 | CSAR_peak_! | 10.83          | - |
| chr2 | 11900573 | 11900631 | CSAR_peak_! | 10.83,12.13    | - |
| chr2 | 11900641 | 11900678 | CSAR_peak_! | 9.58           | - |
| chr2 | 11900746 | 11900797 | CSAR_peak_! | 9.77,8.65      | - |
| chr2 | 11900865 | 11901009 | CSAR_peak_! | 14.63,14.85    | - |
| chr2 | 11901022 | 11901101 | CSAR_peak_! | 10.83          | - |
| chr2 | 11901174 | 11901276 | CSAR_peak_! | 7.26,8.39      | - |
| chr2 | 11901548 | 11901588 | CSAR_peak_! | 5.86           | - |
| chr2 | 11903339 | 11903406 | CSAR_peak_! | 16.11          | - |
| chr2 | 11910770 | 11910831 | CSAR_peak_! | 12.13          | - |
| chr2 | 11912534 | 11912572 | CSAR_peak_! | 6.21           | - |
| chr2 | 11914155 | 11914229 | CSAR_peak_! | 6.21           | - |
| chr2 | 11914769 | 11914826 | CSAR_peak_! | 12.13          | - |
| chr2 | 11914902 | 11914976 | CSAR_peak_! | 12.17,19.36    | - |
| chr2 | 11915382 | 11915436 | CSAR_peak_! | 25.91,6.45     | - |
| chr2 | 11915527 | 11915579 | CSAR_peak_! | 9.58,19.36     | - |
| chr2 | 11916618 | 11916671 | CSAR_peak_! | 12.17          | - |
| chr2 | 11916758 | 11916818 | CSAR_peak_! | 7.29,8.14,7.2- | - |

|      |          |          |             |                |
|------|----------|----------|-------------|----------------|
| chr2 | 11916899 | 11916981 | CSAR_peak_4 | 8.2,10.53,9.5- |
| chr2 | 11917478 | 11917514 | CSAR_peak_! | 7.27 -         |
| chr2 | 11917847 | 11917950 | CSAR_peak_! | 13.51 -        |
| chr2 | 11918536 | 11918578 | CSAR_peak_! | 7,8.13 -       |
| chr2 | 11918807 | 11918853 | CSAR_peak_! | 7.27 -         |
| chr2 | 11919191 | 11919416 | CSAR_peak_! | 19.36,7,7,12.- |
| chr2 | 11919551 | 11919644 | CSAR_peak_! | 7.92,6.21 -    |
| chr2 | 11979626 | 11979690 | CSAR_peak_! | 10.83 -        |
| chr2 | 12124645 | 12124781 | CSAR_peak_! | 17.37 -        |
| chr2 | 12124955 | 12125025 | CSAR_peak_! | 17.82,9.58 -   |
| chr2 | 12125087 | 12125227 | CSAR_peak_! | 13.48,20.54 -  |
| chr2 | 12125590 | 12125604 | CSAR_peak_! | 9.77 -         |
| chr2 | 12125687 | 12125750 | CSAR_peak_! | 5.86,12.13 -   |
| chr2 | 12125796 | 12125820 | CSAR_peak_! | 12.17,9.58 -   |
| chr2 | 12126082 | 12126139 | CSAR_peak_! | 7.61,5.91 -    |
| chr2 | 12126153 | 12126174 | CSAR_peak_! | 6.45 -         |
| chr2 | 12128081 | 12128143 | CSAR_peak_! | 6.87 -         |
| chr2 | 12128298 | 12128336 | CSAR_peak_! | 7.27 -         |
| chr2 | 12128798 | 12128852 | CSAR_peak_! | 12.13,6.21 -   |
| chr2 | 12128942 | 12129017 | CSAR_peak_! | 28.34 -        |
| chr2 | 12129297 | 12129358 | CSAR_peak_! | 10.02,8.94 -   |
| chr2 | 12129361 | 12129389 | CSAR_peak_! | 10.83 -        |
| chr2 | 12129506 | 12129582 | CSAR_peak_! | 8.39,7.27 -    |
| chr2 | 12140520 | 12140552 | CSAR_peak_! | 7.27 -         |
| chr2 | 12142394 | 12142426 | CSAR_peak_! | 9.58,8.39 -    |
| chr2 | 12142536 | 12142588 | CSAR_peak_! | 14.76,10.83 -  |
| chr2 | 12142618 | 12142628 | CSAR_peak_! | 8.39 -         |
| chr2 | 12142869 | 12142969 | CSAR_peak_! | 8.39,11.03 -   |
| chr2 | 12142983 | 12143076 | CSAR_peak_! | 12.23,9.58,9.- |
| chr2 | 12170394 | 12170425 | CSAR_peak_! | 6.21 -         |
| chr2 | 12171839 | 12171880 | CSAR_peak_! | 9.58,7.27 -    |
| chr2 | 12172610 | 12172655 | CSAR_peak_! | 9.58,10.83 -   |
| chr2 | 12173095 | 12173112 | CSAR_peak_! | 7.27 -         |
| chr2 | 12225847 | 12225893 | CSAR_peak_! | 8.39 -         |
| chr2 | 12226378 | 12226384 | CSAR_peak_! | 6.72 -         |
| chr2 | 12226389 | 12226606 | CSAR_peak_! | 10.94,34.16,-  |
| chr2 | 12226642 | 12226678 | CSAR_peak_! | 17.82 -        |
| chr2 | 12226698 | 12226748 | CSAR_peak_! | 9.77,10.31 -   |
| chr2 | 12226797 | 12226883 | CSAR_peak_! | 25.91,12.13 -  |
| chr2 | 12227029 | 12227221 | CSAR_peak_! | 9.77,6.21,9.7- |
| chr2 | 12227229 | 12227273 | CSAR_peak_! | 7.36,7.89 -    |
| chr2 | 12227342 | 12227382 | CSAR_peak_! | 7.7 -          |

|      |          |          |            |                |
|------|----------|----------|------------|----------------|
| chr2 | 12227520 | 12227665 | CSAR_peak_ | 11.14,15.9,1:- |
| chr2 | 12227740 | 12227822 | CSAR_peak_ | 42.59,18.61,{- |
| chr2 | 12228150 | 12228198 | CSAR_peak_ | 8.65 -         |
| chr2 | 12276062 | 12276118 | CSAR_peak_ | 9.58 -         |
| chr2 | 12333074 | 12333115 | CSAR_peak_ | 9.61,6.1 -     |
| chr2 | 12335019 | 12335075 | CSAR_peak_ | 11.45,9.61 -   |
| chr2 | 12356637 | 12356756 | CSAR_peak_ | 33.75,21.22 -  |
| chr2 | 12356800 | 12356908 | CSAR_peak_ | 14.25,8.9 -    |
| chr2 | 12356995 | 12357119 | CSAR_peak_ | 10.83,10.95 -  |
| chr2 | 12357286 | 12357333 | CSAR_peak_ | 9.58 -         |
| chr2 | 12357453 | 12357493 | CSAR_peak_ | 7.27 -         |
| chr2 | 12358104 | 12358152 | CSAR_peak_ | 6.85 -         |
| chr2 | 12358241 | 12358394 | CSAR_peak_ | 7.58,42.44,1:- |
| chr2 | 12358400 | 12358443 | CSAR_peak_ | 11.75 -        |
| chr2 | 12358488 | 12358550 | CSAR_peak_ | 5.86,8.14,7.2- |
| chr2 | 12367237 | 12367280 | CSAR_peak_ | 7.27 -         |
| chr2 | 12368003 | 12368079 | CSAR_peak_ | 6.03,14.88 -   |
| chr2 | 12368484 | 12368562 | CSAR_peak_ | 14.88,12.13 -  |
| chr2 | 12402886 | 12402941 | CSAR_peak_ | 7.27 -         |
| chr2 | 12406678 | 12406752 | CSAR_peak_ | 6.44,6.57 -    |
| chr2 | 12406861 | 12406917 | CSAR_peak_ | 6.21 -         |
| chr2 | 12414278 | 12414335 | CSAR_peak_ | 8.39,6.21 -    |
| chr2 | 12414535 | 12414617 | CSAR_peak_ | 22.93,16.33 -  |
| chr2 | 12414627 | 12414685 | CSAR_peak_ | 16.33,23.98 -  |
| chr2 | 12414706 | 12414874 | CSAR_peak_ | 12.13,42.59,{- |
| chr2 | 12414896 | 12415131 | CSAR_peak_ | 18.85,6.52,1:- |
| chr2 | 12415207 | 12415519 | CSAR_peak_ | 19.48,7.06,5:- |
| chr2 | 12416425 | 12416456 | CSAR_peak_ | 9.58 -         |
| chr2 | 12427315 | 12427417 | CSAR_peak_ | 8.13,6.21 -    |
| chr2 | 12427495 | 12427543 | CSAR_peak_ | 6.21,7.27 -    |
| chr2 | 12490157 | 12490231 | CSAR_peak_ | 9.77 -         |
| chr2 | 12490353 | 12490394 | CSAR_peak_ | 6.21 -         |
| chr2 | 12490810 | 12490898 | CSAR_peak_ | 14.88,10.95 -  |
| chr2 | 12491313 | 12491330 | CSAR_peak_ | 6.21 -         |
| chr2 | 12491521 | 12491571 | CSAR_peak_ | 7.27 -         |
| chr2 | 12491684 | 12491734 | CSAR_peak_ | 10.33 -        |
| chr2 | 12492336 | 12492379 | CSAR_peak_ | 7.27 -         |
| chr2 | 12544904 | 12544947 | CSAR_peak_ | 6.21 -         |
| chr2 | 12545361 | 12545408 | CSAR_peak_ | 7.27 -         |
| chr2 | 12545963 | 12546011 | CSAR_peak_ | 7.27 -         |
| chr2 | 12547450 | 12547527 | CSAR_peak_ | 6.81,7.27 -    |
| chr2 | 12548064 | 12548085 | CSAR_peak_ | 6.21 -         |

|      |          |          |             |                |   |
|------|----------|----------|-------------|----------------|---|
| chr2 | 12613274 | 12613308 | CSAR_peak_! | 7.27           | - |
| chr2 | 12613319 | 12613361 | CSAR_peak_! | 6.57           | - |
| chr2 | 12620977 | 12621019 | CSAR_peak_! | 6.21           | - |
| chr2 | 12624774 | 12624847 | CSAR_peak_! | 6.21           | - |
| chr2 | 12624977 | 12625087 | CSAR_peak_! | 12.13,6.21     | - |
| chr2 | 12625102 | 12625142 | CSAR_peak_! | 10.95          | - |
| chr2 | 12625231 | 12625285 | CSAR_peak_! | 6.81           | - |
| chr2 | 12625426 | 12625530 | CSAR_peak_! | 14.25,20.43    | - |
| chr2 | 12630443 | 12630483 | CSAR_peak_! | 8.39           | - |
| chr2 | 12631113 | 12631150 | CSAR_peak_! | 6.21           | - |
| chr2 | 12631377 | 12631443 | CSAR_peak_! | 13.44          | - |
| chr2 | 12631693 | 12631736 | CSAR_peak_! | 9.58           | - |
| chr2 | 12631749 | 12631836 | CSAR_peak_! | 14.76,11.38    | - |
| chr2 | 12632353 | 12632424 | CSAR_peak_! | 6.57           | - |
| chr2 | 12641909 | 12641966 | CSAR_peak_! | 6.03           | - |
| chr2 | 12644312 | 12644337 | CSAR_peak_! | 6.21           | - |
| chr2 | 12644598 | 12644676 | CSAR_peak_! | 13.44,13.48    | - |
| chr2 | 12673482 | 12673534 | CSAR_peak_! | 7.27           | - |
| chr2 | 12673563 | 12673612 | CSAR_peak_! | 6.21           | - |
| chr2 | 12673635 | 12673692 | CSAR_peak_! | 8.65           | - |
| chr2 | 12673747 | 12673783 | CSAR_peak_! | 7.27           | - |
| chr2 | 12673907 | 12674028 | CSAR_peak_! | 17.88,10.95    | - |
| chr2 | 12674081 | 12674121 | CSAR_peak_! | 6.21           | - |
| chr2 | 12674346 | 12674438 | CSAR_peak_! | 12.13,6.94     | - |
| chr2 | 12674452 | 12674510 | CSAR_peak_! | 14.88          | - |
| chr2 | 12674670 | 12674742 | CSAR_peak_! | 9.58           | - |
| chr2 | 12674755 | 12674780 | CSAR_peak_! | 9.58           | - |
| chr2 | 12674872 | 12674928 | CSAR_peak_! | 6.03,6.85      | - |
| chr2 | 12674957 | 12675084 | CSAR_peak_! | 12.6           | - |
| chr2 | 12675464 | 12675656 | CSAR_peak_! | 16.33,19.36    | - |
| chr2 | 12675667 | 12675813 | CSAR_peak_! | 16.33,13.48    | - |
| chr2 | 12681516 | 12681575 | CSAR_peak_! | 14.88,12.13    | - |
| chr2 | 12681609 | 12681679 | CSAR_peak_! | 10.83          | - |
| chr2 | 12682080 | 12682163 | CSAR_peak_! | 9.58,14.76     | - |
| chr2 | 12682324 | 12682440 | CSAR_peak_! | 10.83          | - |
| chr2 | 12682473 | 12682507 | CSAR_peak_! | 14.99,10.47    | - |
| chr2 | 12682541 | 12682614 | CSAR_peak_! | 7              | - |
| chr2 | 12682753 | 12682882 | CSAR_peak_! | 48.73,48.37    | - |
| chr2 | 12683151 | 12683293 | CSAR_peak_! | 25.91,29.4,1:  | - |
| chr2 | 12683307 | 12683344 | CSAR_peak_! | 9.58           | - |
| chr2 | 12683385 | 12683420 | CSAR_peak_! | 18.95,12.31    | - |
| chr2 | 12683453 | 12683678 | CSAR_peak_! | 12.13,31.12,;- | - |

|      |          |          |             |                |
|------|----------|----------|-------------|----------------|
| chr2 | 12683685 | 12683842 | CSAR_peak_  | 34.84,17.35,-  |
| chr2 | 12683883 | 12683919 | CSAR_peak_  | 7.27 -         |
| chr2 | 12684084 | 12684173 | CSAR_peak_! | 14.34,8.65 -   |
| chr2 | 12684179 | 12684254 | CSAR_peak_! | 14.88 -        |
| chr2 | 12684394 | 12684465 | CSAR_peak_  | 6.21 -         |
| chr2 | 12684535 | 12684646 | CSAR_peak_  | 10.83 -        |
| chr2 | 12769482 | 12769554 | CSAR_peak_  | 9.58 -         |
| chr2 | 12770024 | 12770063 | CSAR_peak_  | 7.27 -         |
| chr2 | 12770203 | 12770224 | CSAR_peak_  | 7.27 -         |
| chr2 | 12782181 | 12782221 | CSAR_peak_  | 6.21 -         |
| chr2 | 12784821 | 12784864 | CSAR_peak_  | 6.21 -         |
| chr2 | 12798112 | 12798160 | CSAR_peak_  | 12.13 -        |
| chr2 | 12798442 | 12798493 | CSAR_peak_  | 6.21 -         |
| chr2 | 12853442 | 12853528 | CSAR_peak_  | 10.83,8.39 -   |
| chr2 | 12853734 | 12853761 | CSAR_peak_  | 6.21 -         |
| chr2 | 12854088 | 12854178 | CSAR_peak_! | 9.58,8.65 -    |
| chr2 | 12856546 | 12856596 | CSAR_peak_! | 10.31 -        |
| chr2 | 12856604 | 12856653 | CSAR_peak_! | 8.39 -         |
| chr2 | 12857122 | 12857172 | CSAR_peak_! | 7.27 -         |
| chr2 | 12861153 | 12861225 | CSAR_peak_  | 7.58 -         |
| chr2 | 12861340 | 12861415 | CSAR_peak_! | 8.39 -         |
| chr2 | 12861489 | 12861533 | CSAR_peak_! | 8.39 -         |
| chr2 | 12861837 | 12861896 | CSAR_peak_  | 10.83,14.88 -  |
| chr2 | 12903593 | 12903692 | CSAR_peak_  | 9.58,9.58,6.8- |
| chr2 | 12903735 | 12903816 | CSAR_peak_  | 8.14,7.58,7.2- |
| chr2 | 12903868 | 12903993 | CSAR_peak_  | 15.21,9.48 -   |
| chr2 | 12903996 | 12904065 | CSAR_peak_  | 18.1,15.21 -   |
| chr2 | 12904070 | 12904184 | CSAR_peak_! | 7.27,14.88 -   |
| chr2 | 12904278 | 12904329 | CSAR_peak_  | 6.21 -         |
| chr2 | 12904379 | 12904493 | CSAR_peak_! | 33.38,30.53 -  |
| chr2 | 12904658 | 12904701 | CSAR_peak_  | 6.21 -         |
| chr2 | 12909807 | 12909870 | CSAR_peak_! | 7.27 -         |
| chr2 | 12929087 | 12929141 | CSAR_peak_! | 13.48 -        |
| chr2 | 12937394 | 12937436 | CSAR_peak_! | 6.1 -          |
| chr2 | 12937471 | 12937523 | CSAR_peak_  | 5.86 -         |
| chr2 | 12937577 | 12937627 | CSAR_peak_  | 14.88 -        |
| chr2 | 12937654 | 12937710 | CSAR_peak_  | 9.58 -         |
| chr2 | 12975854 | 12975948 | CSAR_peak_  | 92.7,181.6,6:- |
| chr2 | 12980983 | 12981034 | CSAR_peak_  | 7.27 -         |
| chr2 | 12981779 | 12981831 | CSAR_peak_! | 10.02,6.21 -   |
| chr2 | 12982529 | 12982582 | CSAR_peak_! | 6.57 -         |
| chr2 | 12991853 | 12991894 | CSAR_peak_  | 9.58 -         |

|      |          |          |             |               |   |
|------|----------|----------|-------------|---------------|---|
| chr2 | 12993904 | 12993958 | CSAR_peak_! | 12.13,22.56   | - |
| chr2 | 12994021 | 12994141 | CSAR_peak_! | 13.48         | - |
| chr2 | 12994327 | 12994642 | CSAR_peak_! | 20.94,7.26,6. | - |
| chr2 | 12994680 | 12994812 | CSAR_peak_! | 12.5,8.13     | - |
| chr2 | 12994933 | 12994983 | CSAR_peak_: | 7.58          | - |
| chr2 | 12995086 | 12995180 | CSAR_peak_: | 19.36         | - |
| chr2 | 12995278 | 12995394 | CSAR_peak_! | 13.48,6.21    | - |
| chr2 | 12997835 | 12997912 | CSAR_peak_! | 10.95,6.85    | - |
| chr2 | 12997979 | 12998028 | CSAR_peak_: | 6.21          | - |
| chr2 | 12998201 | 12998671 | CSAR_peak_! | 31.2,6.21,18. | - |
| chr2 | 12998673 | 12999193 | CSAR_peak_: | 34.93,42.64,; | - |
| chr2 | 12999206 | 12999267 | CSAR_peak_: | 25.91         | - |
| chr2 | 12999352 | 12999436 | CSAR_peak_! | 9.79,21.11    | - |
| chr2 | 12999526 | 12999761 | CSAR_peak_: | 25.62,29.14   | - |
| chr2 | 12999829 | 13000032 | CSAR_peak_! | 7,32.79,27.3  | - |
| chr2 | 13000058 | 13000105 | CSAR_peak_! | 12.74         | - |
| chr2 | 13000134 | 13000210 | CSAR_peak_: | 7,19.36,17.4  | - |
| chr2 | 13002948 | 13003014 | CSAR_peak_: | 9.58          | - |
| chr2 | 13003108 | 13003167 | CSAR_peak_: | 10.83         | - |
| chr2 | 13003394 | 13003435 | CSAR_peak_! | 7.27,7.27     | - |
| chr2 | 13004164 | 13004183 | CSAR_peak_! | 8.39          | - |
| chr2 | 13004779 | 13004831 | CSAR_peak_: | 7.73,9.77     | - |
| chr2 | 13005057 | 13005155 | CSAR_peak_: | 13.66         | - |
| chr2 | 13005551 | 13005588 | CSAR_peak_! | 7.27          | - |
| chr2 | 13019384 | 13019427 | CSAR_peak_! | 12.13         | - |
| chr2 | 13019440 | 13019486 | CSAR_peak_: | 9.97          | - |
| chr2 | 13019515 | 13019577 | CSAR_peak_: | 10.7,7.58     | - |
| chr2 | 13020043 | 13020118 | CSAR_peak_: | 25.07         | - |
| chr2 | 13079350 | 13079392 | CSAR_peak_! | 7.27          | - |
| chr2 | 13079557 | 13079613 | CSAR_peak_! | 7.27          | - |
| chr2 | 13080302 | 13080366 | CSAR_peak_! | 14.88         | - |
| chr2 | 13080508 | 13080564 | CSAR_peak_: | 12.13,8.39    | - |
| chr2 | 13088618 | 13088670 | CSAR_peak_! | 24.21,11.66   | - |
| chr2 | 13088927 | 13089028 | CSAR_peak_! | 9.58,7.27     | - |
| chr2 | 13089544 | 13089617 | CSAR_peak_: | 6.21          | - |
| chr2 | 13089851 | 13089924 | CSAR_peak_: | 16.33         | - |
| chr2 | 13090312 | 13090353 | CSAR_peak_: | 9.58          | - |
| chr2 | 13091120 | 13091164 | CSAR_peak_! | 8.39          | - |
| chr2 | 13091409 | 13091495 | CSAR_peak_: | 8.65,8.39     | - |
| chr2 | 13126269 | 13126325 | CSAR_peak_: | 7.27          | - |
| chr2 | 13126533 | 13126627 | CSAR_peak_: | 6.21,7.27     | - |
| chr2 | 13135681 | 13135733 | CSAR_peak_: | 7.27          | - |



|      |          |          |             |                |   |
|------|----------|----------|-------------|----------------|---|
| chr2 | 13143766 | 13143818 | CSAR_peak_! | 7.27           | - |
| chr2 | 13144223 | 13144278 | CSAR_peak_! | 24.21          | - |
| chr2 | 13183084 | 13183139 | CSAR_peak_! | 8.14           | - |
| chr2 | 13183303 | 13183331 | CSAR_peak_! | 7.27           | - |
| chr2 | 13184125 | 13184180 | CSAR_peak_! | 14.88          | - |
| chr2 | 13184283 | 13184343 | CSAR_peak_! | 16.11,15.2     | - |
| chr2 | 13184556 | 13184649 | CSAR_peak_! | 8.65,8.39      | - |
| chr2 | 13185193 | 13185243 | CSAR_peak_! | 10.83          | - |
| chr2 | 13185760 | 13185802 | CSAR_peak_! | 6.21           | - |
| chr2 | 13188241 | 13188298 | CSAR_peak_! | 7.27           | - |
| chr2 | 13188322 | 13188389 | CSAR_peak_! | 7.27           | - |
| chr2 | 13188419 | 13188703 | CSAR_peak_! | 14.88,7.27,2.! | - |
| chr2 | 13188805 | 13188871 | CSAR_peak_! | 16.33          | - |
| chr2 | 13189172 | 13189247 | CSAR_peak_! | 7.27           | - |
| chr2 | 13209544 | 13209626 | CSAR_peak_! | 12.13          | - |
| chr2 | 13210196 | 13210265 | CSAR_peak_! | 14.76,13.29    | - |
| chr2 | 13210267 | 13210304 | CSAR_peak_! | 8.65           | - |
| chr2 | 13210383 | 13210480 | CSAR_peak_! | 8.39,12.17     | - |
| chr2 | 13210576 | 13210584 | CSAR_peak_! | 6.21           | - |
| chr2 | 13271928 | 13272066 | CSAR_peak_! | 63.42,48.8     | - |
| chr2 | 13292720 | 13292810 | CSAR_peak_! | 13.48,9.58     | - |
| chr2 | 13322395 | 13322443 | CSAR_peak_! | 8.39           | - |
| chr2 | 13324033 | 13324105 | CSAR_peak_! | 5.86,8.39      | - |
| chr2 | 13370098 | 13370148 | CSAR_peak_! | 7.27           | - |
| chr2 | 13371754 | 13371833 | CSAR_peak_! | 17.82,25.91    | - |
| chr2 | 13371885 | 13372021 | CSAR_peak_! | 28.96,18.65    | - |
| chr2 | 13372083 | 13372184 | CSAR_peak_! | 22.41,17.3     | - |
| chr2 | 13372190 | 13372345 | CSAR_peak_! | 21.6,22.8      | - |
| chr2 | 13372490 | 13372574 | CSAR_peak_! | 6.49,30.76,2!  | - |
| chr2 | 13372588 | 13372708 | CSAR_peak_! | 18.97,38.54,!  | - |
| chr2 | 13372719 | 13372800 | CSAR_peak_! | 21.81,10.83,!  | - |
| chr2 | 13372813 | 13373098 | CSAR_peak_! | 11.34,16.33,!  | - |
| chr2 | 13373211 | 13373365 | CSAR_peak_! | 14.88,8.39,8.  | - |
| chr2 | 13373498 | 13373597 | CSAR_peak_! | 31.51,12.76    | - |
| chr2 | 13383722 | 13383759 | CSAR_peak_! | 6.03           | - |
| chr2 | 13383932 | 13384008 | CSAR_peak_! | 7.58           | - |
| chr2 | 13384704 | 13384763 | CSAR_peak_! | 9.58           | - |
| chr2 | 13385743 | 13385821 | CSAR_peak_! | 7.27           | - |
| chr2 | 13388159 | 13388206 | CSAR_peak_! | 9.77           | - |
| chr2 | 13388587 | 13388673 | CSAR_peak_! | 8.39,7.27      | - |
| chr2 | 13389528 | 13389573 | CSAR_peak_! | 7.27           | - |
| chr2 | 13417009 | 13417192 | CSAR_peak_! | 20.94          | - |

|      |          |          |             |               |   |
|------|----------|----------|-------------|---------------|---|
| chr2 | 13417477 | 13417567 | CSAR_peak_! | 20.94,19.36   | - |
| chr2 | 13417712 | 13417793 | CSAR_peak_! | 9.58,14.88    | - |
| chr2 | 13417876 | 13417900 | CSAR_peak_! | 7.27          | - |
| chr2 | 13418262 | 13418314 | CSAR_peak_! | 7.27,9.48,8.5 | - |
| chr2 | 13418393 | 13418483 | CSAR_peak_! | 10.35,15.28,  | - |
| chr2 | 13418599 | 13418660 | CSAR_peak_! | 7.92,9.03     | - |
| chr2 | 13418689 | 13418710 | CSAR_peak_! | 8.13          | - |
| chr2 | 13418822 | 13418902 | CSAR_peak_! | 9.58,6.02     | - |
| chr2 | 13419322 | 13419369 | CSAR_peak_! | 10.53,12.74   | - |
| chr2 | 13419740 | 13419811 | CSAR_peak_! | 12.17         | - |
| chr2 | 13420249 | 13420263 | CSAR_peak_! | 7.58          | - |
| chr2 | 13420354 | 13420393 | CSAR_peak_! | 9.77,6.44     | - |
| chr2 | 13420666 | 13420717 | CSAR_peak_! | 7.27          | - |
| chr2 | 13421014 | 13421061 | CSAR_peak_! | 12.13         | - |
| chr2 | 13421084 | 13421157 | CSAR_peak_! | 7.58,7.27     | - |
| chr2 | 13438204 | 13438254 | CSAR_peak_! | 9.58          | - |
| chr2 | 13438447 | 13438534 | CSAR_peak_! | 10.94,12.6,6. | - |
| chr2 | 13438707 | 13438848 | CSAR_peak_! | 15.68,10.02,  | - |
| chr2 | 13438898 | 13438984 | CSAR_peak_! | 9.41,9.41     | - |
| chr2 | 13439404 | 13439433 | CSAR_peak_! | 8.28          | - |
| chr2 | 13439434 | 13439498 | CSAR_peak_! | 14.76,6.03    | - |
| chr2 | 13439731 | 13439800 | CSAR_peak_! | 24.21,14.88   | - |
| chr2 | 13443632 | 13443707 | CSAR_peak_! | 7.27          | - |
| chr2 | 13445780 | 13445828 | CSAR_peak_! | 9.58          | - |
| chr2 | 13474084 | 13474113 | CSAR_peak_! | 9.58          | - |
| chr2 | 13487340 | 13487403 | CSAR_peak_! | 6.21          | - |
| chr2 | 13488580 | 13488630 | CSAR_peak_! | 12.13         | - |
| chr2 | 13493675 | 13493724 | CSAR_peak_! | 9.58          | - |
| chr2 | 13500852 | 13500886 | CSAR_peak_! | 6.21          | - |
| chr2 | 13506528 | 13506567 | CSAR_peak_! | 5.86          | - |
| chr2 | 13518286 | 13518604 | CSAR_peak_! | 21.56,6.02,1: | - |
| chr2 | 13518757 | 13518823 | CSAR_peak_! | 9.58,7.27     | - |
| chr2 | 13518937 | 13519051 | CSAR_peak_! | 9.58,30.02    | - |
| chr2 | 13519181 | 13519305 | CSAR_peak_! | 13.48,16.33   | - |
| chr2 | 13519505 | 13519562 | CSAR_peak_! | 8.39,10.83    | - |
| chr2 | 13519592 | 13519636 | CSAR_peak_! | 7.27          | - |
| chr2 | 13519677 | 13519729 | CSAR_peak_! | 8.39,9.58     | - |
| chr2 | 13519809 | 13519861 | CSAR_peak_! | 24.21,9.77    | - |
| chr2 | 13520202 | 13520306 | CSAR_peak_! | 13.29,23.03   | - |
| chr2 | 13520376 | 13520454 | CSAR_peak_! | 6.21,6.03     | - |
| chr2 | 13520466 | 13520540 | CSAR_peak_! | 17.82,14.88   | - |
| chr2 | 13520542 | 13520612 | CSAR_peak_! | 9.77,12.17    | - |

|      |          |          |             |               |   |
|------|----------|----------|-------------|---------------|---|
| chr2 | 13520787 | 13520926 | CSAR_peak_  | 14.76,21      | - |
| chr2 | 13521057 | 13521101 | CSAR_peak_! | 12.13         | - |
| chr2 | 13521124 | 13521203 | CSAR_peak_! | 12.13,14.88   | - |
| chr2 | 13521333 | 13521573 | CSAR_peak_! | 13.44,8.19,2  | - |
| chr2 | 13521645 | 13521750 | CSAR_peak_! | 8.39,7.7,9.31 | - |
| chr2 | 13521806 | 13521851 | CSAR_peak_! | 17.75,14.88   | - |
| chr2 | 13521853 | 13522010 | CSAR_peak_! | 25.21,14.88,! | - |
| chr2 | 13522036 | 13522219 | CSAR_peak_! | 20.94,31.2,9. | - |
| chr2 | 13522254 | 13522375 | CSAR_peak_! | 56.85,29.28   | - |
| chr2 | 13522672 | 13522793 | CSAR_peak_! | 23.95,32.41   | - |
| chr2 | 13522846 | 13522905 | CSAR_peak_! | 25.3,29.52    | - |
| chr2 | 13522937 | 13522971 | CSAR_peak_! | 12.74,14.85   | - |
| chr2 | 13523024 | 13523367 | CSAR_peak_! | 11.63,29.69,! | - |
| chr2 | 13523399 | 13523656 | CSAR_peak_! | 6.03,16.92,3  | - |
| chr2 | 13547228 | 13547274 | CSAR_peak_! | 7.58          | - |
| chr2 | 13551054 | 13551131 | CSAR_peak_! | 13.48         | - |
| chr2 | 13561179 | 13561235 | CSAR_peak_! | 6.21          | - |
| chr2 | 13561775 | 13561822 | CSAR_peak_! | 6.21,6.81     | - |
| chr2 | 13563911 | 13563949 | CSAR_peak_! | 6.21          | - |
| chr2 | 13564430 | 13564475 | CSAR_peak_! | 12.13         | - |
| chr2 | 13568027 | 13568096 | CSAR_peak_! | 7.58          | - |
| chr2 | 13584819 | 13584898 | CSAR_peak_! | 8.14          | - |
| chr2 | 13585167 | 13585231 | CSAR_peak_! | 7.27,7.27     | - |
| chr2 | 13585349 | 13585411 | CSAR_peak_! | 7.27,7.27     | - |
| chr2 | 13585468 | 13585517 | CSAR_peak_! | 10.83         | - |
| chr2 | 13638479 | 13638521 | CSAR_peak_! | 6.21          | - |
| chr2 | 13640915 | 13641022 | CSAR_peak_! | 7.58,6.95     | - |
| chr2 | 13683230 | 13683363 | CSAR_peak_! | 7.27,12.13    | - |
| chr2 | 13683546 | 13683613 | CSAR_peak_! | 19.36,6.21    | - |
| chr2 | 13683904 | 13683981 | CSAR_peak_! | 12.13,7.27    | - |
| chr2 | 13684813 | 13684859 | CSAR_peak_! | 7.27          | - |
| chr2 | 13685408 | 13685527 | CSAR_peak_! | 19.36,23.95   | - |
| chr2 | 13685602 | 13685817 | CSAR_peak_! | 9.58,12.13,1  | - |
| chr2 | 13686068 | 13686310 | CSAR_peak_! | 35.24,9.58,1  | - |
| chr2 | 13686343 | 13686401 | CSAR_peak_! | 13.48,12.13   | - |
| chr2 | 13686612 | 13686720 | CSAR_peak_! | 12.13,12.13   | - |
| chr2 | 13686770 | 13687075 | CSAR_peak_! | 30.81,29.4,5. | - |
| chr2 | 13687154 | 13687295 | CSAR_peak_! | 19.98,21.94   | - |
| chr2 | 13687320 | 13687421 | CSAR_peak_! | 25.18,25.07   | - |
| chr2 | 13687513 | 13687655 | CSAR_peak_! | 31.2,12.31    | - |
| chr2 | 13687846 | 13688028 | CSAR_peak_! | 22.56,21.94   | - |
| chr2 | 13688288 | 13688438 | CSAR_peak_! | 10.83,14.88,! | - |

|      |          |          |            |              |   |
|------|----------|----------|------------|--------------|---|
| chr2 | 13688503 | 13688543 | CSAR_peak_ | 7            | - |
| chr2 | 13688551 | 13688659 | CSAR_peak_ | 16.33,9.58   | - |
| chr2 | 13688713 | 13688993 | CSAR_peak_ | 7.58,18.73,4 | - |
| chr2 | 13688998 | 13689099 | CSAR_peak_ | 9.55,8.65    | - |
| chr2 | 13689241 | 13689364 | CSAR_peak_ | 18.73,12.13  | - |
| chr2 | 13805971 | 13806030 | CSAR_peak_ | 9.58         | - |
| chr2 | 13835060 | 13835105 | CSAR_peak_ | 7.27         | - |
| chr2 | 13863810 | 13863838 | CSAR_peak_ | 6.21         | - |
| chr2 | 13863994 | 13864058 | CSAR_peak_ | 10.33        | - |
| chr2 | 13864070 | 13864132 | CSAR_peak_ | 6.53         | - |
| chr2 | 13864173 | 13864245 | CSAR_peak_ | 8.14         | - |
| chr2 | 13864283 | 13864359 | CSAR_peak_ | 6.87         | - |
| chr2 | 13864491 | 13864533 | CSAR_peak_ | 7.27         | - |
| chr2 | 13920801 | 13920895 | CSAR_peak_ | 7.27,9.77    | - |
| chr2 | 13921326 | 13921438 | CSAR_peak_ | 8.39,8.65    | - |
| chr2 | 13921588 | 13921652 | CSAR_peak_ | 25.91        | - |
| chr2 | 13923606 | 13923704 | CSAR_peak_ | 13.85,8.14   | - |
| chr2 | 13923993 | 13924026 | CSAR_peak_ | 5.86         | - |
| chr2 | 13924107 | 13924145 | CSAR_peak_ | 6.21         | - |
| chr2 | 13924412 | 13924464 | CSAR_peak_ | 8.95         | - |
| chr2 | 13924615 | 13924651 | CSAR_peak_ | 8.39         | - |
| chr2 | 13924940 | 13925018 | CSAR_peak_ | 8.39         | - |
| chr2 | 13933152 | 13933195 | CSAR_peak_ | 7.27         | - |
| chr2 | 13962361 | 13962414 | CSAR_peak_ | 16.33,7.27   | - |
| chr2 | 13962598 | 13962683 | CSAR_peak_ | 12.17,8.39   | - |
| chr2 | 13967628 | 13967676 | CSAR_peak_ | 12.13        | - |
| chr2 | 13991739 | 13991780 | CSAR_peak_ | 23.2,6.51    | - |
| chr2 | 13991867 | 13991976 | CSAR_peak_ | 40.88,17.68, | - |
| chr2 | 13992067 | 13992141 | CSAR_peak_ | 12.74        | - |
| chr2 | 13992626 | 13992701 | CSAR_peak_ | 14.88,10.02  | - |
| chr2 | 13993217 | 13993379 | CSAR_peak_ | 33.03,17.82  | - |
| chr2 | 13993697 | 13993749 | CSAR_peak_ | 7.27         | - |
| chr2 | 13994057 | 13994121 | CSAR_peak_ | 12.13,14.88  | - |
| chr2 | 13995694 | 13995736 | CSAR_peak_ | 6.21         | - |
| chr2 | 14019132 | 14019187 | CSAR_peak_ | 10.83        | - |
| chr2 | 14019272 | 14019334 | CSAR_peak_ | 13.48,7.58   | - |
| chr2 | 14019484 | 14019520 | CSAR_peak_ | 11.14        | - |
| chr2 | 14019548 | 14019598 | CSAR_peak_ | 10.83        | - |
| chr2 | 14038664 | 14038727 | CSAR_peak_ | 16.33        | - |
| chr2 | 14040260 | 14040301 | CSAR_peak_ | 6.21         | - |
| chr2 | 14040577 | 14040772 | CSAR_peak_ | 11.66,9.58   | - |
| chr2 | 14040877 | 14040956 | CSAR_peak_ | 10.83        | - |

|      |          |          |             |               |   |
|------|----------|----------|-------------|---------------|---|
| chr2 | 14041562 | 14041620 | CSAR_peak_! | 19.36         | - |
| chr2 | 14041657 | 14041704 | CSAR_peak_! | 6.21          | - |
| chr2 | 14041819 | 14041856 | CSAR_peak_! | 17.82         | - |
| chr2 | 14041920 | 14041940 | CSAR_peak_! | 9.58          | - |
| chr2 | 14042026 | 14042070 | CSAR_peak_! | 17.82         | - |
| chr2 | 14042089 | 14042130 | CSAR_peak_! | 9.77          | - |
| chr2 | 14042703 | 14042738 | CSAR_peak_! | 7.58          | - |
| chr2 | 14042800 | 14042908 | CSAR_peak_! | 12.13,6.95    | - |
| chr2 | 14043034 | 14043120 | CSAR_peak_! | 9.58,7.27     | - |
| chr2 | 14043205 | 14043269 | CSAR_peak_! | 7.27          | - |
| chr2 | 14043467 | 14043556 | CSAR_peak_! | 12.13         | - |
| chr2 | 14043859 | 14043935 | CSAR_peak_! | 27.11         | - |
| chr2 | 14044061 | 14044141 | CSAR_peak_! | 13.09         | - |
| chr2 | 14044316 | 14044437 | CSAR_peak_! | 18.73         | - |
| chr2 | 14044530 | 14044647 | CSAR_peak_! | 31.2,6.44,12. | - |
| chr2 | 14044654 | 14044719 | CSAR_peak_! | 18.73         | - |
| chr2 | 14045119 | 14045206 | CSAR_peak_! | 16.11,13.51   | - |
| chr2 | 14045269 | 14045343 | CSAR_peak_! | 17.82         | - |
| chr2 | 14046657 | 14046723 | CSAR_peak_! | 10.83         | - |
| chr2 | 14047789 | 14047858 | CSAR_peak_! | 11.14         | - |
| chr2 | 14047864 | 14048165 | CSAR_peak_! | 22.1,12.93,3: | - |
| chr2 | 14048178 | 14048237 | CSAR_peak_! | 12.13         | - |
| chr2 | 14048272 | 14048495 | CSAR_peak_! | 8.65,38.64,2! | - |
| chr2 | 14048570 | 14048786 | CSAR_peak_! | 18.06,6.21,1! | - |
| chr2 | 14048804 | 14048988 | CSAR_peak_! | 11.63,24.15,{ | - |
| chr2 | 14049069 | 14049272 | CSAR_peak_! | 31.97,5.86,2! | - |
| chr2 | 14049310 | 14049951 | CSAR_peak_! | 41.98,10.82,; | - |
| chr2 | 14050003 | 14050152 | CSAR_peak_! | 8.92,19.73,3: | - |
| chr2 | 14050203 | 14050349 | CSAR_peak_! | 20.17,24.52   | - |
| chr2 | 14050405 | 14050529 | CSAR_peak_! | 15.68,15.68   | - |
| chr2 | 14050718 | 14050855 | CSAR_peak_! | 12.31,18.73   | - |
| chr2 | 14050950 | 14051013 | CSAR_peak_! | 24.21         | - |
| chr2 | 14057324 | 14057362 | CSAR_peak_! | 6.21          | - |
| chr2 | 14058288 | 14058348 | CSAR_peak_! | 9.58          | - |
| chr2 | 14059561 | 14059611 | CSAR_peak_! | 6.21          | - |
| chr2 | 14059614 | 14059667 | CSAR_peak_! | 6.21          | - |
| chr2 | 14060113 | 14060160 | CSAR_peak_! | 6.21          | - |
| chr2 | 14114710 | 14114758 | CSAR_peak_! | 7.27          | - |
| chr2 | 14126806 | 14126868 | CSAR_peak_! | 6.21          | - |
| chr2 | 14127365 | 14127400 | CSAR_peak_! | 7.27          | - |
| chr2 | 14127497 | 14127531 | CSAR_peak_! | 6.57          | - |
| chr2 | 14128604 | 14128660 | CSAR_peak_! | 9.58,6.21     | - |

|      |          |          |             |                |   |
|------|----------|----------|-------------|----------------|---|
| chr2 | 14129118 | 14129157 | CSAR_peak_  | 6.21           | - |
| chr2 | 14129623 | 14129660 | CSAR_peak_! | 9.58           | - |
| chr2 | 14204472 | 14204552 | CSAR_peak_! | 20.43,10.31    | - |
| chr2 | 14204707 | 14204759 | CSAR_peak_! | 8.28,12.13     | - |
| chr2 | 14205147 | 14205171 | CSAR_peak_! | 7.34,9.58      | - |
| chr2 | 14205253 | 14205309 | CSAR_peak_! | 12.31,16.77    | - |
| chr2 | 14205319 | 14205395 | CSAR_peak_! | 20.13,9.58     | - |
| chr2 | 14206066 | 14206113 | CSAR_peak_! | 9.58           | - |
| chr2 | 14206566 | 14206653 | CSAR_peak_! | 9.58           | - |
| chr2 | 14207780 | 14207836 | CSAR_peak_! | 9.58,6.03      | - |
| chr2 | 14207982 | 14208024 | CSAR_peak_! | 5.86           | - |
| chr2 | 14208028 | 14208059 | CSAR_peak_! | 14.76          | - |
| chr2 | 14208145 | 14208227 | CSAR_peak_! | 9.61,9.41      | - |
| chr2 | 14208243 | 14208341 | CSAR_peak_! | 13.48,10.83    | - |
| chr2 | 14208374 | 14208442 | CSAR_peak_! | 28.94,7.73     | - |
| chr2 | 14208571 | 14208631 | CSAR_peak_! | 8.2            | - |
| chr2 | 14208645 | 14208704 | CSAR_peak_! | 7.27           | - |
| chr2 | 14209066 | 14209103 | CSAR_peak_! | 8.39           | - |
| chr2 | 14237777 | 14237831 | CSAR_peak_! | 9.58           | - |
| chr2 | 14267096 | 14267189 | CSAR_peak_! | 17.82,20.94    | - |
| chr2 | 14267594 | 14267657 | CSAR_peak_! | 17.82          | - |
| chr2 | 14279070 | 14279116 | CSAR_peak_! | 8.39           | - |
| chr2 | 14279126 | 14279206 | CSAR_peak_! | 8.39,9.58      | - |
| chr2 | 14279439 | 14279511 | CSAR_peak_! | 13.29          | - |
| chr2 | 14280303 | 14280400 | CSAR_peak_! | 9.58           | - |
| chr2 | 14282760 | 14282839 | CSAR_peak_! | 20.94          | - |
| chr2 | 14301736 | 14301818 | CSAR_peak_! | 9.58,5.86      | - |
| chr2 | 14302986 | 14303034 | CSAR_peak_! | 6.21           | - |
| chr2 | 14303164 | 14303229 | CSAR_peak_! | 14.88          | - |
| chr2 | 14303447 | 14303495 | CSAR_peak_! | 6.21           | - |
| chr2 | 14304094 | 14304113 | CSAR_peak_! | 9.58           | - |
| chr2 | 14304132 | 14304201 | CSAR_peak_! | 17.37,16.05    | - |
| chr2 | 14304281 | 14304337 | CSAR_peak_! | 8.39           | - |
| chr2 | 14304360 | 14304458 | CSAR_peak_! | 33.03,24.21    | - |
| chr2 | 14304466 | 14304634 | CSAR_peak_! | 8.39,14.63,7.- | - |
| chr2 | 14304742 | 14305009 | CSAR_peak_! | 53.5,54.31     | - |
| chr2 | 14305013 | 14305101 | CSAR_peak_! | 18.73,48.73    | - |
| chr2 | 14305184 | 14305249 | CSAR_peak_! | 28.21,18.65    | - |
| chr2 | 14305452 | 14305513 | CSAR_peak_! | 9.58           | - |
| chr2 | 14305528 | 14305882 | CSAR_peak_! | 27.58,6.02,5.- | - |
| chr2 | 14305949 | 14306011 | CSAR_peak_! | 33.13,25.53    | - |
| chr2 | 14306045 | 14306124 | CSAR_peak_! | 12.55,24.33    | - |

|      |          |          |             |              |   |
|------|----------|----------|-------------|--------------|---|
| chr2 | 14306158 | 14306326 | CSAR_peak_  | 42.59,17.87  | - |
| chr2 | 14306382 | 14306490 | CSAR_peak_! | 12.13,10.83, | - |
| chr2 | 14306496 | 14306648 | CSAR_peak_! | 22.74,30.53  | - |
| chr2 | 14306679 | 14306716 | CSAR_peak_  | 7.73         | - |
| chr2 | 14306721 | 14307312 | CSAR_peak_! | 34.95,57.27, | - |
| chr2 | 14307337 | 14307806 | CSAR_peak_! | 26.58,29.4,3 | - |
| chr2 | 14307980 | 14308082 | CSAR_peak_  | 11.07,17.82  | - |
| chr2 | 14308162 | 14308251 | CSAR_peak_! | 20.88,8.23,2 | - |
| chr2 | 14308253 | 14308309 | CSAR_peak_  | 9.2,19.24    | - |
| chr2 | 14308316 | 14308463 | CSAR_peak_! | 18.61,31.2,9 | - |
| chr2 | 14308471 | 14309080 | CSAR_peak_! | 8.39,16.33,4 | - |
| chr2 | 14309138 | 14309297 | CSAR_peak_! | 6.03,12.13   | - |
| chr2 | 14309311 | 14309426 | CSAR_peak_  | 52.03,70.36  | - |
| chr2 | 14309449 | 14309501 | CSAR_peak_  | 7.27         | - |
| chr2 | 14309503 | 14310038 | CSAR_peak_  | 7.27,67.63,8 | - |
| chr2 | 14310050 | 14310334 | CSAR_peak_! | 14.28,82.41, | - |
| chr2 | 14311824 | 14311892 | CSAR_peak_! | 7.27         | - |
| chr2 | 14326976 | 14327020 | CSAR_peak_! | 9.77         | - |
| chr2 | 14358534 | 14358572 | CSAR_peak_! | 8.95         | - |
| chr2 | 14358662 | 14358679 | CSAR_peak_! | 8.39         | - |
| chr2 | 14377979 | 14378064 | CSAR_peak_! | 8.39,8.14    | - |
| chr2 | 14378456 | 14378514 | CSAR_peak_! | 11.03,12.13  | - |
| chr2 | 14378613 | 14378665 | CSAR_peak_  | 6.21         | - |
| chr2 | 14379116 | 14379169 | CSAR_peak_! | 7.58         | - |
| chr2 | 14380510 | 14380552 | CSAR_peak_  | 6.21         | - |
| chr2 | 14380758 | 14380808 | CSAR_peak_! | 12.31        | - |
| chr2 | 14396451 | 14396517 | CSAR_peak_  | 7.27,8.39    | - |
| chr2 | 14396631 | 14396700 | CSAR_peak_! | 12.13,7.27   | - |
| chr2 | 14396715 | 14396757 | CSAR_peak_! | 12.17        | - |
| chr2 | 14396963 | 14397000 | CSAR_peak_  | 6.21         | - |
| chr2 | 14397460 | 14397600 | CSAR_peak_! | 21.24,9.58,2 | - |
| chr2 | 14397760 | 14397860 | CSAR_peak_! | 19.36        | - |
| chr2 | 14398189 | 14398209 | CSAR_peak_  | 6.21         | - |
| chr2 | 14398241 | 14398349 | CSAR_peak_! | 23.03,7.92   | - |
| chr2 | 14398462 | 14398498 | CSAR_peak_  | 17.82        | - |
| chr2 | 14398517 | 14398546 | CSAR_peak_! | 12.13,6.51   | - |
| chr2 | 14398655 | 14398725 | CSAR_peak_! | 6.87,10.83   | - |
| chr2 | 14398760 | 14398802 | CSAR_peak_  | 7.58         | - |
| chr2 | 14473923 | 14473972 | CSAR_peak_  | 7.27         | - |
| chr2 | 14474008 | 14474145 | CSAR_peak_! | 19.36,9.58,9 | - |
| chr2 | 14474421 | 14474485 | CSAR_peak_! | 14.76,18.73  | - |
| chr2 | 14474589 | 14474640 | CSAR_peak_! | 12.13        | - |

|      |          |          |             |              |   |
|------|----------|----------|-------------|--------------|---|
| chr2 | 14474897 | 14474976 | CSAR_peak_! | 14.88,7.58   | - |
| chr2 | 14475062 | 14475099 | CSAR_peak_! | 9.58,16.33   | - |
| chr2 | 14475147 | 14475173 | CSAR_peak_! | 12.13        | - |
| chr2 | 14475259 | 14475318 | CSAR_peak_! | 5.86,14.88,2 | - |
| chr2 | 14476116 | 14476172 | CSAR_peak_! | 9.77         | - |
| chr2 | 14476175 | 14476279 | CSAR_peak_! | 10.13,10.83  | - |
| chr2 | 14476319 | 14476383 | CSAR_peak_! | 8.44         | - |
| chr2 | 14476450 | 14476665 | CSAR_peak_! | 73.76,13.47, | - |
| chr2 | 14478754 | 14478802 | CSAR_peak_! | 8.39         | - |
| chr2 | 14522604 | 14522709 | CSAR_peak_! | 5.91,11.96   | - |
| chr2 | 14522956 | 14523018 | CSAR_peak_! | 11.47        | - |
| chr2 | 14523337 | 14523375 | CSAR_peak_! | 14.88        | - |
| chr2 | 14528131 | 14528195 | CSAR_peak_! | 8.2          | - |
| chr2 | 14529431 | 14529499 | CSAR_peak_! | 7.27,13.48   | - |
| chr2 | 14532769 | 14532833 | CSAR_peak_! | 19.36,9.58   | - |
| chr2 | 14533240 | 14533273 | CSAR_peak_! | 7.27,8.65    | - |
| chr2 | 14533933 | 14534039 | CSAR_peak_! | 13.66,9.58   | - |
| chr2 | 14544010 | 14544108 | CSAR_peak_! | 9.58,8.39    | - |
| chr2 | 14544163 | 14544262 | CSAR_peak_! | 34.89,17.4   | - |
| chr2 | 14544287 | 14544467 | CSAR_peak_! | 14.08,24.21, | - |
| chr2 | 14544656 | 14544692 | CSAR_peak_! | 10.83        | - |
| chr2 | 14544791 | 14544960 | CSAR_peak_! | 14.63,9.77   | - |
| chr2 | 14545078 | 14545129 | CSAR_peak_! | 9.61         | - |
| chr2 | 14545155 | 14545200 | CSAR_peak_! | 6.21         | - |
| chr2 | 14545208 | 14545330 | CSAR_peak_! | 24.21,12.5   | - |
| chr2 | 14545435 | 14545607 | CSAR_peak_! | 44.69,33.47  | - |
| chr2 | 14545725 | 14545784 | CSAR_peak_! | 42.64,7.27   | - |
| chr2 | 14545904 | 14545967 | CSAR_peak_! | 14.88,8.39   | - |
| chr2 | 14546044 | 14546161 | CSAR_peak_! | 33.03,8.39   | - |
| chr2 | 14546218 | 14546257 | CSAR_peak_! | 6.21         | - |
| chr2 | 14546370 | 14546415 | CSAR_peak_! | 6.21         | - |
| chr2 | 14546618 | 14546671 | CSAR_peak_! | 17.82,20.94  | - |
| chr2 | 14546700 | 14546738 | CSAR_peak_! | 7.27         | - |
| chr2 | 14548196 | 14548237 | CSAR_peak_! | 7.27         | - |
| chr2 | 14568392 | 14568456 | CSAR_peak_! | 9.58         | - |
| chr2 | 14617081 | 14617124 | CSAR_peak_! | 7.27,7.27    | - |
| chr2 | 14617254 | 14617339 | CSAR_peak_! | 20.43,6.87   | - |
| chr2 | 14617436 | 14617473 | CSAR_peak_! | 6.85,13.51   | - |
| chr2 | 14617902 | 14617984 | CSAR_peak_! | 19.36,7.58   | - |
| chr2 | 14618260 | 14618296 | CSAR_peak_! | 7.27         | - |
| chr2 | 14618387 | 14618435 | CSAR_peak_! | 7.27,16.33   | - |
| chr2 | 14618472 | 14618525 | CSAR_peak_! | 7.27         | - |



|      |          |          |             |               |   |
|------|----------|----------|-------------|---------------|---|
| chr2 | 14618752 | 14618804 | CSAR_peak_! | 9.58          | - |
| chr2 | 14619398 | 14619465 | CSAR_peak_! | 9.27          | - |
| chr2 | 14619870 | 14619923 | CSAR_peak_! | 13.48,7.27    | - |
| chr2 | 14620070 | 14620181 | CSAR_peak_! | 13.48,7.92    | - |
| chr2 | 14620202 | 14620245 | CSAR_peak_! | 8.39,9.58     | - |
| chr2 | 14620425 | 14620504 | CSAR_peak_! | 13.48         | - |
| chr2 | 14620802 | 14620868 | CSAR_peak_! | 12.13         | - |
| chr2 | 14621002 | 14621065 | CSAR_peak_! | 7.27,6.21     | - |
| chr2 | 14621269 | 14621310 | CSAR_peak_! | 7.27          | - |
| chr2 | 14621683 | 14621734 | CSAR_peak_! | 7,6.21        | - |
| chr2 | 14622150 | 14622206 | CSAR_peak_! | 9.58,8.95     | - |
| chr2 | 14622511 | 14622550 | CSAR_peak_! | 6.21          | - |
| chr2 | 14623420 | 14623493 | CSAR_peak_! | 9.41,27.11    | - |
| chr2 | 14623596 | 14623699 | CSAR_peak_! | 40.72,10.02   | - |
| chr2 | 14624212 | 14624234 | CSAR_peak_! | 5.86          | - |
| chr2 | 14624400 | 14624445 | CSAR_peak_! | 6.81          | - |
| chr2 | 14626313 | 14626371 | CSAR_peak_! | 7.27,6.21     | - |
| chr2 | 14626810 | 14626872 | CSAR_peak_! | 8.28,12.13    | - |
| chr2 | 14626972 | 14627010 | CSAR_peak_! | 7.27          | - |
| chr2 | 14640857 | 14640898 | CSAR_peak_! | 12.13         | - |
| chr2 | 14641127 | 14641186 | CSAR_peak_! | 9.58,8.39     | - |
| chr2 | 14641442 | 14641496 | CSAR_peak_! | 8.95          | - |
| chr2 | 14641618 | 14641688 | CSAR_peak_! | 12.31         | - |
| chr2 | 14641776 | 14641814 | CSAR_peak_! | 12.13         | - |
| chr2 | 14642168 | 14642221 | CSAR_peak_! | 9.58          | - |
| chr2 | 14642306 | 14642363 | CSAR_peak_! | 7.27          | - |
| chr2 | 14642518 | 14642540 | CSAR_peak_! | 9.77,7.27     | - |
| chr2 | 14642656 | 14642706 | CSAR_peak_! | 12.17,12.13   | - |
| chr2 | 14643064 | 14643176 | CSAR_peak_! | 8.39,6.21     | - |
| chr2 | 14650310 | 14650375 | CSAR_peak_! | 17.82,12.13   | - |
| chr2 | 14651020 | 14651136 | CSAR_peak_! | 8.39,8.65,7.2 | - |
| chr2 | 14661170 | 14661192 | CSAR_peak_! | 6.21          | - |
| chr2 | 14661427 | 14661472 | CSAR_peak_! | 10.02         | - |
| chr2 | 14661571 | 14661612 | CSAR_peak_! | 8.39          | - |
| chr2 | 14662144 | 14662246 | CSAR_peak_! | 7.92,8.39,12. | - |
| chr2 | 14662389 | 14662439 | CSAR_peak_! | 8.13,7.92,6.8 | - |
| chr2 | 14662443 | 14662501 | CSAR_peak_! | 10.31,10.31   | - |
| chr2 | 14662568 | 14662650 | CSAR_peak_! | 7.27,8.2,8.2  | - |
| chr2 | 14663113 | 14663181 | CSAR_peak_! | 14.88,12.74   | - |
| chr2 | 14663456 | 14663496 | CSAR_peak_! | 14.76         | - |
| chr2 | 14663664 | 14663832 | CSAR_peak_! | 12.6,28.34    | - |
| chr2 | 14664169 | 14664205 | CSAR_peak_! | 6.21          | - |

|      |          |          |             |                |   |
|------|----------|----------|-------------|----------------|---|
| chr2 | 14724361 | 14724402 | CSAR_peak_! | 6.21           | - |
| chr2 | 14737365 | 14737447 | CSAR_peak_! | 9.58,7.27      | - |
| chr2 | 14737519 | 14737564 | CSAR_peak_! | 9.58           | - |
| chr2 | 14737779 | 14737873 | CSAR_peak_! | 14.88,8.39     | - |
| chr2 | 14738094 | 14738135 | CSAR_peak_! | 6.21           | - |
| chr2 | 14738582 | 14738664 | CSAR_peak_! | 12.13,12.17    | - |
| chr2 | 14738964 | 14739031 | CSAR_peak_! | 7.27           | - |
| chr2 | 14739187 | 14739290 | CSAR_peak_! | 17.82,7.58     | - |
| chr2 | 14739452 | 14739492 | CSAR_peak_! | 7.27           | - |
| chr2 | 14739608 | 14739660 | CSAR_peak_! | 9.58           | - |
| chr2 | 14764496 | 14764541 | CSAR_peak_! | 7.27           | - |
| chr2 | 14767108 | 14767167 | CSAR_peak_! | 8.39           | - |
| chr2 | 14767796 | 14767847 | CSAR_peak_! | 10.95          | - |
| chr2 | 14775487 | 14775543 | CSAR_peak_! | 8.39           | - |
| chr2 | 14775629 | 14775678 | CSAR_peak_! | 8.39           | - |
| chr2 | 14777540 | 14777583 | CSAR_peak_! | 6.21           | - |
| chr2 | 14794519 | 14794596 | CSAR_peak_! | 12.13,10.83    | - |
| chr2 | 14797635 | 14797699 | CSAR_peak_! | 8.39           | - |
| chr2 | 14798065 | 14798110 | CSAR_peak_! | 7.27           | - |
| chr2 | 14798207 | 14798263 | CSAR_peak_! | 8.39           | - |
| chr2 | 14799320 | 14799379 | CSAR_peak_! | 9.58,7.27      | - |
| chr2 | 14800605 | 14800660 | CSAR_peak_! | 7.27           | - |
| chr2 | 14800807 | 14800914 | CSAR_peak_! | 8.39,8.65      | - |
| chr2 | 14801037 | 14801082 | CSAR_peak_! | 9.58           | - |
| chr2 | 14802012 | 14802063 | CSAR_peak_! | 9.58,8.39      | - |
| chr2 | 14803381 | 14803466 | CSAR_peak_! | 14.88          | - |
| chr2 | 14805698 | 14805744 | CSAR_peak_! | 6.21           | - |
| chr2 | 14806624 | 14806677 | CSAR_peak_! | 7.27           | - |
| chr2 | 14861212 | 14861301 | CSAR_peak_! | 17.82,8.39     | - |
| chr2 | 14861356 | 14861409 | CSAR_peak_! | 6.21,10.95     | - |
| chr2 | 14861463 | 14861588 | CSAR_peak_! | 19.36,9.61     | - |
| chr2 | 14861604 | 14861844 | CSAR_peak_! | 29.4,15.2      | - |
| chr2 | 14861901 | 14862001 | CSAR_peak_! | 13.48,6.21     | - |
| chr2 | 14894372 | 14894458 | CSAR_peak_! | 54.26,85.04,-  | - |
| chr2 | 14894543 | 14894629 | CSAR_peak_! | 10.77,53.2,5{- | - |
| chr2 | 14894713 | 14894799 | CSAR_peak_! | 107.56,13.74-  | - |
| chr2 | 14894870 | 14894962 | CSAR_peak_! | 140.31,11.45-  | - |
| chr2 | 14895812 | 14895865 | CSAR_peak_! | 7.27           | - |
| chr2 | 14896168 | 14896207 | CSAR_peak_! | 7.27           | - |
| chr2 | 14904313 | 14904407 | CSAR_peak_! | 12.13,12.13    | - |
| chr2 | 14917084 | 14917129 | CSAR_peak_! | 13.48          | - |
| chr2 | 14917365 | 14917409 | CSAR_peak_! | 7.27           | - |

|      |          |          |             |               |   |
|------|----------|----------|-------------|---------------|---|
| chr2 | 14918407 | 14918469 | CSAR_peak_! | 7.27          | - |
| chr2 | 14918571 | 14918644 | CSAR_peak_! | 6.21          | - |
| chr2 | 14919120 | 14919243 | CSAR_peak_! | 20.94,6.21    | - |
| chr2 | 14923146 | 14923211 | CSAR_peak_! | 14.88         | - |
| chr2 | 14923678 | 14923755 | CSAR_peak_! | 16.33         | - |
| chr2 | 14924202 | 14924233 | CSAR_peak_! | 6.21,9.58     | - |
| chr2 | 14961584 | 14961617 | CSAR_peak_! | 8.39          | - |
| chr2 | 14961711 | 14961800 | CSAR_peak_! | 7.27          | - |
| chr2 | 14962244 | 14962296 | CSAR_peak_! | 7.58          | - |
| chr2 | 14989694 | 14989744 | CSAR_peak_! | 7.27          | - |
| chr2 | 14996807 | 14996852 | CSAR_peak_! | 9.58          | - |
| chr2 | 14996970 | 14997041 | CSAR_peak_! | 7.26          | - |
| chr2 | 14997108 | 14997177 | CSAR_peak_! | 6.02,5.62     | - |
| chr2 | 14997184 | 14997346 | CSAR_peak_! | 16.11,28.34,1 | - |
| chr2 | 14997483 | 14997546 | CSAR_peak_! | 31.2          | - |
| chr2 | 14997655 | 14997736 | CSAR_peak_! | 10.31,13.48   | - |
| chr2 | 14997843 | 14997937 | CSAR_peak_! | 13.44,20.43   | - |
| chr2 | 14998068 | 14998134 | CSAR_peak_! | 9.77          | - |
| chr2 | 14998152 | 14998157 | CSAR_peak_! | 5.86          | - |
| chr2 | 14998354 | 14998424 | CSAR_peak_! | 14.76,25.62   | - |
| chr2 | 14998456 | 14998480 | CSAR_peak_! | 9.61          | - |
| chr2 | 14998576 | 14998600 | CSAR_peak_! | 6.44          | - |
| chr2 | 14998618 | 14998775 | CSAR_peak_! | 9.27,18.65    | - |
| chr2 | 15011698 | 15011748 | CSAR_peak_! | 6.81          | - |
| chr2 | 15011792 | 15011846 | CSAR_peak_! | 7.27,7.27     | - |
| chr2 | 15012074 | 15012126 | CSAR_peak_! | 7.27          | - |
| chr2 | 15012631 | 15012705 | CSAR_peak_! | 10.83,37.04   | - |
| chr2 | 15012783 | 15012841 | CSAR_peak_! | 12.13,8.39    | - |
| chr2 | 15013352 | 15013405 | CSAR_peak_! | 14.88,17.82   | - |
| chr2 | 15013557 | 15013610 | CSAR_peak_! | 8.65          | - |
| chr2 | 15013727 | 15013949 | CSAR_peak_! | 35.83,16.05   | - |
| chr2 | 15014067 | 15014109 | CSAR_peak_! | 16.33         | - |
| chr2 | 15027592 | 15027670 | CSAR_peak_! | 26.66,13.25,1 | - |
| chr2 | 15027710 | 15027806 | CSAR_peak_! | 6.02,14.52,1  | - |
| chr2 | 15027867 | 15027957 | CSAR_peak_! | 12.95,21.96,1 | - |
| chr2 | 15027985 | 15028090 | CSAR_peak_! | 30.27,18.1    | - |
| chr2 | 15029351 | 15029426 | CSAR_peak_! | 7.27          | - |
| chr2 | 15029570 | 15029656 | CSAR_peak_! | 62.52,111.78  | - |
| chr2 | 15029718 | 15029803 | CSAR_peak_! | 69,36.13,6.21 | - |
| chr2 | 15029822 | 15029934 | CSAR_peak_! | 177.76,222.8  | - |
| chr2 | 15029949 | 15030044 | CSAR_peak_! | 52.76,157.22  | - |
| chr2 | 15030086 | 15030238 | CSAR_peak_! | 128.57,127.4  | - |

|      |          |          |             |               |   |
|------|----------|----------|-------------|---------------|---|
| chr2 | 15037855 | 15037874 | CSAR_peak_! | 7.27          | - |
| chr2 | 15037959 | 15037996 | CSAR_peak_! | 10.02         | - |
| chr2 | 15038435 | 15038461 | CSAR_peak_! | 14.88         | - |
| chr2 | 15038913 | 15038959 | CSAR_peak_! | 13.48         | - |
| chr2 | 15063231 | 15063263 | CSAR_peak_! | 6.44          | - |
| chr2 | 15063464 | 15063519 | CSAR_peak_! | 7.92,9.58     | - |
| chr2 | 15063672 | 15063688 | CSAR_peak_! | 7.27          | - |
| chr2 | 15063828 | 15063869 | CSAR_peak_! | 8.09          | - |
| chr2 | 15064090 | 15064101 | CSAR_peak_! | 6.21          | - |
| chr2 | 15064215 | 15064260 | CSAR_peak_! | 6.1,13.44     | - |
| chr2 | 15064785 | 15064857 | CSAR_peak_! | 12.13         | - |
| chr2 | 15065106 | 15065323 | CSAR_peak_! | 38.71,16.11,; | - |
| chr2 | 15083378 | 15083425 | CSAR_peak_! | 9.58          | - |
| chr2 | 15083428 | 15083471 | CSAR_peak_! | 6.21          | - |
| chr2 | 15083509 | 15083575 | CSAR_peak_! | 8.39,7.27     | - |
| chr2 | 15083727 | 15083795 | CSAR_peak_! | 17.82         | - |
| chr2 | 15083850 | 15083968 | CSAR_peak_! | 19.36         | - |
| chr2 | 15084140 | 15084229 | CSAR_peak_! | 17.82         | - |
| chr2 | 15089197 | 15089247 | CSAR_peak_! | 7.27          | - |
| chr2 | 15089438 | 15089531 | CSAR_peak_! | 7.27          | - |
| chr2 | 15089541 | 15089560 | CSAR_peak_! | 9.77          | - |
| chr2 | 15089565 | 15089709 | CSAR_peak_! | 20.13,9.58    | - |
| chr2 | 15089827 | 15089895 | CSAR_peak_! | 8.14          | - |
| chr2 | 15090006 | 15090077 | CSAR_peak_! | 14.88,25.18   | - |
| chr2 | 15090879 | 15090940 | CSAR_peak_! | 8.95          | - |
| chr2 | 15090942 | 15090976 | CSAR_peak_! | 7.27          | - |
| chr2 | 15091136 | 15091169 | CSAR_peak_! | 7.27          | - |
| chr2 | 15091553 | 15091629 | CSAR_peak_! | 9.58          | - |
| chr2 | 15091735 | 15091794 | CSAR_peak_! | 17.82         | - |
| chr2 | 15143051 | 15143212 | CSAR_peak_! | 16.33,6.57,7  | - |
| chr2 | 15143263 | 15143326 | CSAR_peak_! | 8.65          | - |
| chr2 | 15143360 | 15143411 | CSAR_peak_! | 5.86,5.86     | - |
| chr2 | 15143587 | 15143618 | CSAR_peak_! | 9.43          | - |
| chr2 | 15146008 | 15146086 | CSAR_peak_! | 12.13         | - |
| chr2 | 15146531 | 15146582 | CSAR_peak_! | 7.27          | - |
| chr2 | 15146605 | 15146666 | CSAR_peak_! | 7.73,12.13    | - |
| chr2 | 15146742 | 15146831 | CSAR_peak_! | 17.51,6.21    | - |
| chr2 | 15147304 | 15147389 | CSAR_peak_! | 19.98         | - |
| chr2 | 15147468 | 15147513 | CSAR_peak_! | 8.2,6.21      | - |
| chr2 | 15149709 | 15149740 | CSAR_peak_! | 7.27,6.21     | - |
| chr2 | 15149773 | 15149835 | CSAR_peak_! | 24.21         | - |
| chr2 | 15151088 | 15151168 | CSAR_peak_! | 7.34          | - |

|      |          |          |             |                |   |
|------|----------|----------|-------------|----------------|---|
| chr2 | 15197757 | 15197823 | CSAR_peak_! | 7.27           | - |
| chr2 | 15198247 | 15198300 | CSAR_peak_! | 9.58           | - |
| chr2 | 15198707 | 15198745 | CSAR_peak_! | 7.27           | - |
| chr2 | 15204987 | 15205062 | CSAR_peak_! | 9.58           | - |
| chr2 | 15209081 | 15209182 | CSAR_peak_! | 14.76,24.21    | - |
| chr2 | 15209249 | 15209254 | CSAR_peak_! | 7.27           | - |
| chr2 | 15209996 | 15210041 | CSAR_peak_! | 8.39           | - |
| chr2 | 15212832 | 15212880 | CSAR_peak_! | 7.27           | - |
| chr2 | 15225710 | 15225789 | CSAR_peak_! | 9.27           | - |
| chr2 | 15226217 | 15226272 | CSAR_peak_! | 9.58,7.27      | - |
| chr2 | 15226546 | 15226681 | CSAR_peak_! | 16.11,18.73    | - |
| chr2 | 15267080 | 15267128 | CSAR_peak_! | 7.27           | - |
| chr2 | 15268181 | 15268244 | CSAR_peak_! | 7.27,9.58      | - |
| chr2 | 15269550 | 15269630 | CSAR_peak_! | 6.21           | - |
| chr2 | 15269884 | 15269936 | CSAR_peak_! | 9.58           | - |
| chr2 | 15270083 | 15270121 | CSAR_peak_! | 7.27           | - |
| chr2 | 15270680 | 15270761 | CSAR_peak_! | 13.48          | - |
| chr2 | 15271112 | 15271154 | CSAR_peak_! | 9.58           | - |
| chr2 | 15271251 | 15271306 | CSAR_peak_! | 7.27           | - |
| chr2 | 15271862 | 15271874 | CSAR_peak_! | 6.44           | - |
| chr2 | 15271914 | 15271970 | CSAR_peak_! | 7              | - |
| chr2 | 15272555 | 15272616 | CSAR_peak_! | 8.39,6.21      | - |
| chr2 | 15297095 | 15297172 | CSAR_peak_! | 7.58           | - |
| chr2 | 15303575 | 15303628 | CSAR_peak_! | 6.21           | - |
| chr2 | 15304897 | 15305006 | CSAR_peak_! | 14.88          | - |
| chr2 | 15305151 | 15305228 | CSAR_peak_! | 7.27           | - |
| chr2 | 15305493 | 15305533 | CSAR_peak_! | 12.13          | - |
| chr2 | 15305814 | 15305859 | CSAR_peak_! | 12.13          | - |
| chr2 | 15306172 | 15306246 | CSAR_peak_! | 24.21,6.85     | - |
| chr2 | 15307503 | 15307558 | CSAR_peak_! | 9.58           | - |
| chr2 | 15320870 | 15320908 | CSAR_peak_! | 6.21           | - |
| chr2 | 15321157 | 15321162 | CSAR_peak_! | 6.57           | - |
| chr2 | 15321245 | 15321290 | CSAR_peak_! | 9.58           | - |
| chr2 | 15321390 | 15321453 | CSAR_peak_! | 17.82          | - |
| chr2 | 15321480 | 15321533 | CSAR_peak_! | 12.13,8.09     | - |
| chr2 | 15321679 | 15321817 | CSAR_peak_! | 25.65,28.22    | - |
| chr2 | 15321854 | 15321874 | CSAR_peak_! | 9.58           | - |
| chr2 | 15321969 | 15322047 | CSAR_peak_! | 14.88,20.94,;- | - |
| chr2 | 15322119 | 15322181 | CSAR_peak_! | 22.74,19.26    | - |
| chr2 | 15322237 | 15322272 | CSAR_peak_! | 15.2           | - |
| chr2 | 15322470 | 15322552 | CSAR_peak_! | 9.58,9.77      | - |
| chr2 | 15322641 | 15322794 | CSAR_peak_! | 6.21,9.58,5.8- | - |

|      |          |          |             |                  |   |
|------|----------|----------|-------------|------------------|---|
| chr2 | 15322904 | 15322988 | CSAR_peak_  | 11.66,12.13      | - |
| chr2 | 15323092 | 15323140 | CSAR_peak_! | 7.27             | - |
| chr2 | 15323237 | 15323341 | CSAR_peak_  | 7.94,16.88       | - |
| chr2 | 15323721 | 15323791 | CSAR_peak_  | 12.17,7.27       | - |
| chr2 | 15350873 | 15350908 | CSAR_peak_! | 6.57             | - |
| chr2 | 15353892 | 15353943 | CSAR_peak_  | 6.21             | - |
| chr2 | 15365040 | 15365097 | CSAR_peak_  | 14.88            | - |
| chr2 | 15369438 | 15369474 | CSAR_peak_  | 12.13            | - |
| chr2 | 15370714 | 15370759 | CSAR_peak_  | 7.27             | - |
| chr2 | 15408097 | 15408152 | CSAR_peak_! | 7.27,7.27        | - |
| chr2 | 15408225 | 15408292 | CSAR_peak_! | 9.58             | - |
| chr2 | 15409164 | 15409224 | CSAR_peak_  | 9.58             | - |
| chr2 | 15409419 | 15409455 | CSAR_peak_! | 8.39             | - |
| chr2 | 15409689 | 15409704 | CSAR_peak_! | 7.27             | - |
| chr2 | 15425702 | 15425745 | CSAR_peak_  | 7.27             | - |
| chr2 | 15425761 | 15425827 | CSAR_peak_! | 17.4             | - |
| chr2 | 15426194 | 15426279 | CSAR_peak_  | 14.63,5.86,14.63 | - |
| chr2 | 15426693 | 15426750 | CSAR_peak_! | 7.78,7.27        | - |
| chr2 | 15427182 | 15427259 | CSAR_peak_  | 17.37            | - |
| chr2 | 15428133 | 15428181 | CSAR_peak_! | 7.58             | - |
| chr2 | 15428198 | 15428229 | CSAR_peak_! | 7.27             | - |
| chr2 | 15428528 | 15428594 | CSAR_peak_  | 5.86,9.55        | - |
| chr2 | 15428730 | 15428761 | CSAR_peak_! | 8.39             | - |
| chr2 | 15429426 | 15429539 | CSAR_peak_! | 10.62,11.32      | - |
| chr2 | 15429671 | 15429726 | CSAR_peak_! | 12.31,9.58       | - |
| chr2 | 15429841 | 15429886 | CSAR_peak_! | 7.27             | - |
| chr2 | 15430697 | 15430782 | CSAR_peak_  | 6.21,14.76       | - |
| chr2 | 15431400 | 15431426 | CSAR_peak_! | 25.91            | - |
| chr2 | 15431532 | 15431613 | CSAR_peak_  | 13.29,40.66      | - |
| chr2 | 15431722 | 15431798 | CSAR_peak_  | 6.21,6.64        | - |
| chr2 | 15432402 | 15432467 | CSAR_peak_! | 7.27             | - |
| chr2 | 15432921 | 15433008 | CSAR_peak_! | 11.96,8.12       | - |
| chr2 | 15433083 | 15433189 | CSAR_peak_  | 10.83            | - |
| chr2 | 15433922 | 15434009 | CSAR_peak_  | 21.56,15.2       | - |
| chr2 | 15434388 | 15434427 | CSAR_peak_  | 12.13,8.39       | - |
| chr2 | 15434519 | 15434605 | CSAR_peak_  | 12.17,25.18      | - |
| chr2 | 15434695 | 15434738 | CSAR_peak_  | 6.21,6.21        | - |
| chr2 | 15435131 | 15435204 | CSAR_peak_  | 12.13            | - |
| chr2 | 15435436 | 15435552 | CSAR_peak_! | 10.95,18.95      | - |
| chr2 | 15435630 | 15435707 | CSAR_peak_! | 10.95,12.17      | - |
| chr2 | 15436074 | 15436152 | CSAR_peak_! | 17.63            | - |
| chr2 | 15436248 | 15436328 | CSAR_peak_! | 20.43,8.13       | - |

|      |          |          |            |               |   |
|------|----------|----------|------------|---------------|---|
| chr2 | 15436818 | 15436915 | CSAR_peak_ | 14.88,18.1    | - |
| chr2 | 15437270 | 15437334 | CSAR_peak_ | 8.52,23.42    | - |
| chr2 | 15437464 | 15437495 | CSAR_peak_ | 7.58          | - |
| chr2 | 15437776 | 15437837 | CSAR_peak_ | 6.21          | - |
| chr2 | 15438503 | 15438568 | CSAR_peak_ | 14.88,7.27    | - |
| chr2 | 15438782 | 15438819 | CSAR_peak_ | 6.57,6.21     | - |
| chr2 | 15439011 | 15439048 | CSAR_peak_ | 7.27,6.57     | - |
| chr2 | 15454847 | 15454887 | CSAR_peak_ | 16.33         | - |
| chr2 | 15454926 | 15455009 | CSAR_peak_ | 14.88,12.13   | - |
| chr2 | 15455618 | 15455673 | CSAR_peak_ | 9.58          | - |
| chr2 | 15455677 | 15455728 | CSAR_peak_ | 10.31         | - |
| chr2 | 15455810 | 15455878 | CSAR_peak_ | 8.14,7.34     | - |
| chr2 | 15455894 | 15455984 | CSAR_peak_ | 7.51,5.86,6.2 | - |
| chr2 | 15456025 | 15456123 | CSAR_peak_ | 5.86,12.17,6. | - |
| chr2 | 15456481 | 15456540 | CSAR_peak_ | 7.27          | - |
| chr2 | 15456688 | 15456735 | CSAR_peak_ | 7.27          | - |
| chr2 | 15457306 | 15457347 | CSAR_peak_ | 12.13,8.95    | - |
| chr2 | 15457418 | 15457551 | CSAR_peak_ | 14.88,13.48,! | - |
| chr2 | 15457571 | 15457620 | CSAR_peak_ | 8.39          | - |
| chr2 | 15457690 | 15457764 | CSAR_peak_ | 17.82,12.74   | - |
| chr2 | 15457910 | 15457984 | CSAR_peak_ | 17.82,19.36   | - |
| chr2 | 15458435 | 15458480 | CSAR_peak_ | 7.34,10.83    | - |
| chr2 | 15458507 | 15458557 | CSAR_peak_ | 20.94,9.61    | - |
| chr2 | 15458753 | 15458807 | CSAR_peak_ | 13.48         | - |
| chr2 | 15458838 | 15458883 | CSAR_peak_ | 10.83,17.82,! | - |
| chr2 | 15459122 | 15459158 | CSAR_peak_ | 9.58          | - |
| chr2 | 15459215 | 15459251 | CSAR_peak_ | 15.3,16.87    | - |
| chr2 | 15459644 | 15459804 | CSAR_peak_ | 19.09,24.15   | - |
| chr2 | 15459811 | 15459849 | CSAR_peak_ | 7.27          | - |
| chr2 | 15459979 | 15460060 | CSAR_peak_ | 8.2,17.82,8.3 | - |
| chr2 | 15460090 | 15460209 | CSAR_peak_ | 11.38,17.84,! | - |
| chr2 | 15460532 | 15460615 | CSAR_peak_ | 12.13,24.21   | - |
| chr2 | 15460783 | 15460819 | CSAR_peak_ | 9.77,12.13    | - |
| chr2 | 15460846 | 15460874 | CSAR_peak_ | 7.47,7,16.54  | - |
| chr2 | 15460966 | 15461017 | CSAR_peak_ | 29.4,12.6,5.8 | - |
| chr2 | 15461032 | 15461138 | CSAR_peak_ | 13.51,12.13,! | - |
| chr2 | 15461772 | 15461815 | CSAR_peak_ | 8.39          | - |
| chr2 | 15461830 | 15461909 | CSAR_peak_ | 14.63,8.65    | - |
| chr2 | 15462006 | 15462025 | CSAR_peak_ | 8.39          | - |
| chr2 | 15462044 | 15462187 | CSAR_peak_ | 17.82         | - |
| chr2 | 15462286 | 15462346 | CSAR_peak_ | 6.21          | - |
| chr2 | 15462458 | 15462584 | CSAR_peak_ | 6.81,8.34,14. | - |

|      |          |          |            |               |   |
|------|----------|----------|------------|---------------|---|
| chr2 | 15463087 | 15463115 | CSAR_peak_ | 6.03,19.36    | - |
| chr2 | 15463256 | 15463335 | CSAR_peak_ | 6.03,17.82    | - |
| chr2 | 15463339 | 15463342 | CSAR_peak_ | 7             | - |
| chr2 | 15463436 | 15463468 | CSAR_peak_ | 7.27          | - |
| chr2 | 15463655 | 15463862 | CSAR_peak_ | 18.85,12.31,  | - |
| chr2 | 15464422 | 15464516 | CSAR_peak_ | 24.52,9.03    | - |
| chr2 | 15464733 | 15464804 | CSAR_peak_ | 20.83,9.28    | - |
| chr2 | 15464862 | 15464995 | CSAR_peak_ | 12.13         | - |
| chr2 | 15465128 | 15465188 | CSAR_peak_ | 11.66,10.7,1  | - |
| chr2 | 15465194 | 15465260 | CSAR_peak_ | 13.48         | - |
| chr2 | 15465369 | 15465459 | CSAR_peak_ | 12.13,14.88   | - |
| chr2 | 15465554 | 15465656 | CSAR_peak_ | 9.79,27.77    | - |
| chr2 | 15466032 | 15466111 | CSAR_peak_ | 9.77,14.93    | - |
| chr2 | 15466192 | 15466291 | CSAR_peak_ | 29.14,13.76   | - |
| chr2 | 15466336 | 15466386 | CSAR_peak_ | 7.27          | - |
| chr2 | 15466727 | 15466868 | CSAR_peak_ | 40.66,18.73,  | - |
| chr2 | 15467271 | 15467298 | CSAR_peak_ | 13.48,6.21    | - |
| chr2 | 15467360 | 15467389 | CSAR_peak_ | 8.09,9.35     | - |
| chr2 | 15467468 | 15467572 | CSAR_peak_ | 26.37,9.58    | - |
| chr2 | 15467751 | 15467783 | CSAR_peak_ | 14.88         | - |
| chr2 | 15467874 | 15468016 | CSAR_peak_ | 24.21,20.21   | - |
| chr2 | 15468102 | 15468159 | CSAR_peak_ | 7.27          | - |
| chr2 | 15468162 | 15468211 | CSAR_peak_ | 12.31         | - |
| chr2 | 15468460 | 15468544 | CSAR_peak_ | 8.18          | - |
| chr2 | 15468551 | 15468564 | CSAR_peak_ | 8.2           | - |
| chr2 | 15468886 | 15468998 | CSAR_peak_ | 6.57,9.27,13. | - |
| chr2 | 15469024 | 15469053 | CSAR_peak_ | 17.4          | - |
| chr2 | 15469290 | 15469402 | CSAR_peak_ | 18.73,12.72,  | - |
| chr2 | 15469459 | 15469511 | CSAR_peak_ | 25.62,23.49   | - |
| chr2 | 15469557 | 15469656 | CSAR_peak_ | 14.88,18.65   | - |
| chr2 | 15480397 | 15480451 | CSAR_peak_ | 22.56         | - |
| chr2 | 15480503 | 15480550 | CSAR_peak_ | 12.13         | - |
| chr2 | 15480678 | 15480717 | CSAR_peak_ | 7.27          | - |
| chr2 | 15480824 | 15480910 | CSAR_peak_ | 13.48,10.83   | - |
| chr2 | 15489491 | 15489533 | CSAR_peak_ | 6.95          | - |
| chr2 | 15492054 | 15492139 | CSAR_peak_ | 9.58,6.21     | - |
| chr2 | 15510543 | 15510580 | CSAR_peak_ | 6.21          | - |
| chr2 | 15510682 | 15510734 | CSAR_peak_ | 7.27,10.02    | - |
| chr2 | 15510967 | 15510992 | CSAR_peak_ | 9.58          | - |
| chr2 | 15537576 | 15537674 | CSAR_peak_ | 7.27,7.27     | - |
| chr2 | 15538924 | 15538984 | CSAR_peak_ | 6.21          | - |
| chr2 | 15557746 | 15557831 | CSAR_peak_ | 17.82,7.58    | - |



|      |          |          |            |                |   |
|------|----------|----------|------------|----------------|---|
| chr2 | 15559283 | 15559347 | CSAR_peak_ | 14.88,12.13    | - |
| chr2 | 15559881 | 15559919 | CSAR_peak_ | 7.58           | - |
| chr2 | 15559927 | 15559978 | CSAR_peak_ | 13.44          | - |
| chr2 | 15560135 | 15560174 | CSAR_peak_ | 7.92           | - |
| chr2 | 15598223 | 15598263 | CSAR_peak_ | 7.27           | - |
| chr2 | 15599052 | 15599097 | CSAR_peak_ | 6.21           | - |
| chr2 | 15599210 | 15599221 | CSAR_peak_ | 5.79           | - |
| chr2 | 15599309 | 15599349 | CSAR_peak_ | 13.44          | - |
| chr2 | 15599603 | 15599650 | CSAR_peak_ | 7.27           | - |
| chr2 | 15604240 | 15604309 | CSAR_peak_ | 7.27           | - |
| chr2 | 15605892 | 15605946 | CSAR_peak_ | 12.13          | - |
| chr2 | 15607024 | 15607092 | CSAR_peak_ | 8.39,7.27      | - |
| chr2 | 15607517 | 15607554 | CSAR_peak_ | 6.21           | - |
| chr2 | 15607941 | 15608037 | CSAR_peak_ | 13.48,17.82    | - |
| chr2 | 15613457 | 15613503 | CSAR_peak_ | 6.21           | - |
| chr2 | 15613717 | 15613744 | CSAR_peak_ | 6.21           | - |
| chr2 | 15614137 | 15614183 | CSAR_peak_ | 9.58           | - |
| chr2 | 15614530 | 15614597 | CSAR_peak_ | 6.57           | - |
| chr2 | 15614736 | 15614807 | CSAR_peak_ | 23.89,16.11    | - |
| chr2 | 15634697 | 15634785 | CSAR_peak_ | 7.78           | - |
| chr2 | 15634836 | 15634921 | CSAR_peak_ | 8.14,16.33     | - |
| chr2 | 15634975 | 15635084 | CSAR_peak_ | 21.94,9.77     | - |
| chr2 | 15635133 | 15635334 | CSAR_peak_ | 19.36,9.58,6.- | - |
| chr2 | 15635336 | 15635374 | CSAR_peak_ | 8.14           | - |
| chr2 | 15635449 | 15635563 | CSAR_peak_ | 27.83,5.86,9.- | - |
| chr2 | 15635753 | 15635803 | CSAR_peak_ | 16.77,18.1     | - |
| chr2 | 15635842 | 15635870 | CSAR_peak_ | 8.13,11.38     | - |
| chr2 | 15635949 | 15636012 | CSAR_peak_ | 7.58,10.31     | - |
| chr2 | 15670404 | 15670501 | CSAR_peak_ | 10.83          | - |
| chr2 | 15670858 | 15670937 | CSAR_peak_ | 9.58,7.27,7    | - |
| chr2 | 15671035 | 15671100 | CSAR_peak_ | 16.33,14.92    | - |
| chr2 | 15671171 | 15671220 | CSAR_peak_ | 6.21,6.03      | - |
| chr2 | 15671325 | 15671434 | CSAR_peak_ | 7.58,7.78      | - |
| chr2 | 15671554 | 15671610 | CSAR_peak_ | 12.74          | - |
| chr2 | 15672225 | 15672315 | CSAR_peak_ | 33.47,13.51    | - |
| chr2 | 15698382 | 15698431 | CSAR_peak_ | 6.21           | - |
| chr2 | 15722650 | 15722688 | CSAR_peak_ | 6.21           | - |
| chr2 | 15722978 | 15722991 | CSAR_peak_ | 9.58           | - |
| chr2 | 15723081 | 15723143 | CSAR_peak_ | 12.13          | - |
| chr2 | 15723330 | 15723416 | CSAR_peak_ | 8.65,5.86      | - |
| chr2 | 15724058 | 15724112 | CSAR_peak_ | 18.73,11.96    | - |
| chr2 | 15726661 | 15726710 | CSAR_peak_ | 7.27           | - |

|      |          |          |            |                |   |
|------|----------|----------|------------|----------------|---|
| chr2 | 15726719 | 15726775 | CSAR_peak_ | 17.82,6.21     | - |
| chr2 | 15727276 | 15727325 | CSAR_peak_ | 7.27,11.66     | - |
| chr2 | 15745055 | 15745147 | CSAR_peak_ | 9.77,5.86,7.2  | - |
| chr2 | 15745307 | 15745377 | CSAR_peak_ | 10.95,14.88    | - |
| chr2 | 15745569 | 15745628 | CSAR_peak_ | 8.39           | - |
| chr2 | 15745887 | 15745929 | CSAR_peak_ | 6.95           | - |
| chr2 | 15746096 | 15746240 | CSAR_peak_ | 20.13,5.86,10  | - |
| chr2 | 15746315 | 15746350 | CSAR_peak_ | 8.39           | - |
| chr2 | 15746405 | 15746489 | CSAR_peak_ | 6.1,9.55,31.2  | - |
| chr2 | 15746574 | 15746621 | CSAR_peak_ | 7.27           | - |
| chr2 | 15746765 | 15746843 | CSAR_peak_ | 12.17          | - |
| chr2 | 15746890 | 15746960 | CSAR_peak_ | 8.39,11.14     | - |
| chr2 | 15747403 | 15747466 | CSAR_peak_ | 10.83,14.88    | - |
| chr2 | 15747575 | 15747616 | CSAR_peak_ | 7.27           | - |
| chr2 | 15747628 | 15747635 | CSAR_peak_ | 9.61           | - |
| chr2 | 15747718 | 15747806 | CSAR_peak_ | 19.15,15.56    | - |
| chr2 | 15747914 | 15747924 | CSAR_peak_ | 7.27           | - |
| chr2 | 15747940 | 15747991 | CSAR_peak_ | 8.39,22.56     | - |
| chr2 | 15748101 | 15748163 | CSAR_peak_ | 16.54          | - |
| chr2 | 15748303 | 15748353 | CSAR_peak_ | 8.39           | - |
| chr2 | 15748420 | 15748484 | CSAR_peak_ | 7.27           | - |
| chr2 | 15748556 | 15748646 | CSAR_peak_ | 17.37,9.58     | - |
| chr2 | 15748872 | 15748956 | CSAR_peak_ | 7.92,25.91     | - |
| chr2 | 15749117 | 15749197 | CSAR_peak_ | 16.54,13.48    | - |
| chr2 | 15749305 | 15749379 | CSAR_peak_ | 10.94,17.52    | - |
| chr2 | 15752484 | 15752542 | CSAR_peak_ | 7.27           | - |
| chr2 | 15755542 | 15755616 | CSAR_peak_ | 10.82,7.58,10  | - |
| chr2 | 15755832 | 15755928 | CSAR_peak_ | 19.36,22.56    | - |
| chr2 | 15755940 | 15755944 | CSAR_peak_ | 6.21           | - |
| chr2 | 15755999 | 15756061 | CSAR_peak_ | 11.38          | - |
| chr2 | 15756485 | 15756563 | CSAR_peak_ | 7.27,9.58      | - |
| chr2 | 15756816 | 15756877 | CSAR_peak_ | 14.88          | - |
| chr2 | 15762657 | 15762707 | CSAR_peak_ | 7.27           | - |
| chr2 | 15802646 | 15802706 | CSAR_peak_ | 20.94,12.17    | - |
| chr2 | 15814904 | 15814951 | CSAR_peak_ | 7.27           | - |
| chr2 | 15815756 | 15815804 | CSAR_peak_ | 9.77           | - |
| chr2 | 15815813 | 15815976 | CSAR_peak_ | 10.83,7.27     | - |
| chr2 | 15890070 | 15890157 | CSAR_peak_ | 33.65,13.26,10 | - |
| chr2 | 15890233 | 15890324 | CSAR_peak_ | 21.72,27.73,10 | - |
| chr2 | 15890379 | 15890494 | CSAR_peak_ | 38.35,23.89,10 | - |
| chr2 | 15911382 | 15911428 | CSAR_peak_ | 9.77           | - |
| chr2 | 15915614 | 15915661 | CSAR_peak_ | 8.39           | - |

|      |          |          |            |               |   |
|------|----------|----------|------------|---------------|---|
| chr2 | 15978824 | 15978879 | CSAR_peak_ | 12.13         | - |
| chr2 | 15990707 | 15990735 | CSAR_peak_ | 6.21          | - |
| chr2 | 15990931 | 15991024 | CSAR_peak_ | 7.58,12.13    | - |
| chr2 | 15992546 | 15992604 | CSAR_peak_ | 16.33,9.58    | - |
| chr2 | 15992894 | 15992925 | CSAR_peak_ | 8.39          | - |
| chr2 | 15993086 | 15993130 | CSAR_peak_ | 7.27          | - |
| chr2 | 16023719 | 16023760 | CSAR_peak_ | 14.88         | - |
| chr2 | 16023972 | 16024016 | CSAR_peak_ | 13.48         | - |
| chr2 | 16024020 | 16024137 | CSAR_peak_ | 16.34,10.62   | - |
| chr2 | 16025706 | 16025787 | CSAR_peak_ | 14.22         | - |
| chr2 | 16026304 | 16026351 | CSAR_peak_ | 12.13         | - |
| chr2 | 16026532 | 16026589 | CSAR_peak_ | 12.59,11.66   | - |
| chr2 | 16027028 | 16027100 | CSAR_peak_ | 27.64,9.58    | - |
| chr2 | 16027244 | 16027287 | CSAR_peak_ | 6.85,7.34     | - |
| chr2 | 16028265 | 16028542 | CSAR_peak_ | 13.48,18.73,1 | - |
| chr2 | 16033928 | 16034018 | CSAR_peak_ | 8.39          | - |
| chr2 | 16034853 | 16034895 | CSAR_peak_ | 6.21          | - |
| chr2 | 16035102 | 16035140 | CSAR_peak_ | 6.21          | - |
| chr2 | 16036593 | 16036635 | CSAR_peak_ | 7.27          | - |
| chr2 | 16037013 | 16037065 | CSAR_peak_ | 6.03          | - |
| chr2 | 16087259 | 16087386 | CSAR_peak_ | 9.58          | - |
| chr2 | 16088445 | 16088504 | CSAR_peak_ | 7.58          | - |
| chr2 | 16088593 | 16088676 | CSAR_peak_ | 9.58,6.57,12. | - |
| chr2 | 16088876 | 16088898 | CSAR_peak_ | 10.83,7.58    | - |
| chr2 | 16089639 | 16089707 | CSAR_peak_ | 10.02,8.39    | - |
| chr2 | 16106462 | 16106535 | CSAR_peak_ | 11.96,10.83   | - |
| chr2 | 16147633 | 16147705 | CSAR_peak_ | 6.02          | - |
| chr2 | 16148114 | 16148180 | CSAR_peak_ | 9.58          | - |
| chr2 | 16148621 | 16148752 | CSAR_peak_ | 7.92,13,8.65  | - |
| chr2 | 16161853 | 16161929 | CSAR_peak_ | 17.82,9.58    | - |
| chr2 | 16163794 | 16163869 | CSAR_peak_ | 7.27          | - |
| chr2 | 16165610 | 16165679 | CSAR_peak_ | 9.58          | - |
| chr2 | 16196397 | 16196439 | CSAR_peak_ | 7.27          | - |
| chr2 | 16197114 | 16197168 | CSAR_peak_ | 8.95          | - |
| chr2 | 16197530 | 16197566 | CSAR_peak_ | 7.58          | - |
| chr2 | 16198186 | 16198260 | CSAR_peak_ | 8.13,12.13    | - |
| chr2 | 16203379 | 16203413 | CSAR_peak_ | 6.21          | - |
| chr2 | 16236692 | 16236740 | CSAR_peak_ | 6.21          | - |
| chr2 | 16277732 | 16277781 | CSAR_peak_ | 7.27          | - |
| chr2 | 16310055 | 16310091 | CSAR_peak_ | 7.27          | - |
| chr2 | 16310777 | 16310800 | CSAR_peak_ | 6.21          | - |
| chr2 | 16312948 | 16313001 | CSAR_peak_ | 7.27,9.58     | - |

|      |          |          |            |                  |   |
|------|----------|----------|------------|------------------|---|
| chr2 | 16321709 | 16321765 | CSAR_peak_ | 12.13,31.2       | - |
| chr2 | 16321769 | 16321881 | CSAR_peak_ | 9.79             | - |
| chr2 | 16321898 | 16322030 | CSAR_peak_ | 10.83,8.14,11.1  | - |
| chr2 | 16322705 | 16322758 | CSAR_peak_ | 12.13            | - |
| chr2 | 16322969 | 16323025 | CSAR_peak_ | 9.58             | - |
| chr2 | 16323235 | 16323290 | CSAR_peak_ | 9.77             | - |
| chr2 | 16323346 | 16323395 | CSAR_peak_ | 8.39,7.27        | - |
| chr2 | 16323500 | 16323558 | CSAR_peak_ | 23.03,19.36      | - |
| chr2 | 16323633 | 16323758 | CSAR_peak_ | 19.98,17.82      | - |
| chr2 | 16323863 | 16324048 | CSAR_peak_ | 10.82,27.73,11.1 | - |
| chr2 | 16324146 | 16324176 | CSAR_peak_ | 13.51            | - |
| chr2 | 16324207 | 16324339 | CSAR_peak_ | 16.11,26.69      | - |
| chr2 | 16324444 | 16324487 | CSAR_peak_ | 8.28,6.44        | - |
| chr2 | 16324500 | 16324553 | CSAR_peak_ | 9.58,25.91       | - |
| chr2 | 16324573 | 16324638 | CSAR_peak_ | 13.44,8.39       | - |
| chr2 | 16324996 | 16325047 | CSAR_peak_ | 17.51,11.66      | - |
| chr2 | 16325124 | 16325210 | CSAR_peak_ | 25.07,13.48      | - |
| chr2 | 16325257 | 16325396 | CSAR_peak_ | 23.03,18.73      | - |
| chr2 | 16325411 | 16325513 | CSAR_peak_ | 29.28,19.83,11.1 | - |
| chr2 | 16325577 | 16325660 | CSAR_peak_ | 16.11,19.36      | - |
| chr2 | 16325829 | 16325880 | CSAR_peak_ | 7.27             | - |
| chr2 | 16325981 | 16326045 | CSAR_peak_ | 11.34,6.85       | - |
| chr2 | 16326072 | 16326152 | CSAR_peak_ | 40.66,14.63      | - |
| chr2 | 16326209 | 16326323 | CSAR_peak_ | 28.21,16.11      | - |
| chr2 | 16326344 | 16326457 | CSAR_peak_ | 6.02,17.4,8.3    | - |
| chr2 | 16326566 | 16326683 | CSAR_peak_ | 6.95,24.21       | - |
| chr2 | 16326704 | 16326763 | CSAR_peak_ | 8.65,25.91       | - |
| chr2 | 16326812 | 16327014 | CSAR_peak_ | 14.88,8.14,11.1  | - |
| chr2 | 16327127 | 16327197 | CSAR_peak_ | 9.48,10.83,11.1  | - |
| chr2 | 16357885 | 16357920 | CSAR_peak_ | 6.03             | - |
| chr2 | 16358266 | 16358319 | CSAR_peak_ | 10.83,7.27       | - |
| chr2 | 16390081 | 16390143 | CSAR_peak_ | 7.27             | - |
| chr2 | 16390555 | 16390677 | CSAR_peak_ | 14.88            | - |
| chr2 | 16392468 | 16392530 | CSAR_peak_ | 7.27,10.02       | - |
| chr2 | 16392569 | 16392686 | CSAR_peak_ | 9.58,6.81        | - |
| chr2 | 16392942 | 16393120 | CSAR_peak_ | 42.64,7.58,9.5   | - |
| chr2 | 16393152 | 16393225 | CSAR_peak_ | 12.13,7.27       | - |
| chr2 | 16393960 | 16394036 | CSAR_peak_ | 10.31            | - |
| chr2 | 16396312 | 16396359 | CSAR_peak_ | 6.21             | - |
| chr2 | 16397165 | 16397213 | CSAR_peak_ | 6.21             | - |
| chr2 | 16398387 | 16398443 | CSAR_peak_ | 9.58             | - |
| chr2 | 16401767 | 16401830 | CSAR_peak_ | 17.82,17.82      | - |

|      |          |          |             |             |   |
|------|----------|----------|-------------|-------------|---|
| chr2 | 16402636 | 16402680 | CSAR_peak_4 | 6.81        | - |
| chr2 | 16402749 | 16402830 | CSAR_peak_4 | 6.81        | - |
| chr2 | 16402990 | 16403056 | CSAR_peak_1 | 16.11,6.03  | - |
| chr2 | 16403159 | 16403186 | CSAR_peak_1 | 13.48       | - |
| chr2 | 16405371 | 16405408 | CSAR_peak_1 | 8.39        | - |
| chr2 | 16406613 | 16406664 | CSAR_peak_1 | 10.83       | - |
| chr2 | 16414460 | 16414517 | CSAR_peak_1 | 23.03       | - |
| chr2 | 16414606 | 16414672 | CSAR_peak_1 | 22.58,22.69 | - |
| chr2 | 16414699 | 16414799 | CSAR_peak_1 | 9.77,10.33  | - |
| chr2 | 16415348 | 16415398 | CSAR_peak_1 | 8.09        | - |
| chr2 | 16415454 | 16415517 | CSAR_peak_1 | 6.85        | - |
| chr2 | 16415547 | 16415647 | CSAR_peak_1 | 9.58        | - |
| chr2 | 16415756 | 16415800 | CSAR_peak_1 | 10.95,13.85 | - |
| chr2 | 16416123 | 16416225 | CSAR_peak_1 | 15.2,12.15  | - |
| chr2 | 16416266 | 16416327 | CSAR_peak_4 | 7.77        | - |
| chr2 | 16416332 | 16416356 | CSAR_peak_1 | 9.58,8.95   | - |
| chr2 | 16450854 | 16450893 | CSAR_peak_1 | 7.27        | - |
| chr2 | 16451644 | 16451660 | CSAR_peak_1 | 8.2         | - |
| chr2 | 16451759 | 16451800 | CSAR_peak_1 | 13.69       | - |
| chr2 | 16465639 | 16465695 | CSAR_peak_1 | 8.39        | - |
| chr2 | 16473119 | 16473210 | CSAR_peak_1 | 10.83,8.39  | - |
| chr2 | 16478112 | 16478196 | CSAR_peak_1 | 14.88,7.27  | - |
| chr2 | 16478315 | 16478382 | CSAR_peak_1 | 7.27        | - |
| chr2 | 16478501 | 16478608 | CSAR_peak_1 | 8.39,17.82  | - |
| chr2 | 16479950 | 16480005 | CSAR_peak_1 | 8.65,12.13  | - |
| chr2 | 16480098 | 16480144 | CSAR_peak_1 | 14.88,7.27  | - |
| chr2 | 16480640 | 16480689 | CSAR_peak_1 | 7.27        | - |
| chr2 | 16480867 | 16480953 | CSAR_peak_1 | 6.21        | - |
| chr2 | 16481092 | 16481143 | CSAR_peak_1 | 6.21        | - |
| chr2 | 16481485 | 16481542 | CSAR_peak_1 | 12.13       | - |
| chr2 | 16482040 | 16482100 | CSAR_peak_1 | 9.58        | - |
| chr2 | 16482328 | 16482380 | CSAR_peak_1 | 7.92        | - |
| chr2 | 16522850 | 16522950 | CSAR_peak_1 | 13.48       | - |
| chr2 | 16529174 | 16529195 | CSAR_peak_1 | 9.58        | - |
| chr2 | 16529212 | 16529249 | CSAR_peak_1 | 6.57        | - |
| chr2 | 16529270 | 16529307 | CSAR_peak_1 | 16.33       | - |
| chr2 | 16538024 | 16538089 | CSAR_peak_1 | 13.48       | - |
| chr2 | 16567203 | 16567337 | CSAR_peak_1 | 14.88,8.95  | - |
| chr2 | 16567686 | 16567761 | CSAR_peak_4 | 9.55        | - |
| chr2 | 16567781 | 16567833 | CSAR_peak_4 | 6.81        | - |
| chr2 | 16571182 | 16571254 | CSAR_peak_1 | 8.02,9.32   | - |
| chr2 | 16571255 | 16571356 | CSAR_peak_1 | 21.72,10.85 | - |

|      |          |          |            |                |
|------|----------|----------|------------|----------------|
| chr2 | 16571554 | 16571702 | CSAR_peak_ | 14.62,18.73,-  |
| chr2 | 16571742 | 16571808 | CSAR_peak_ | 14.59,22.41 -  |
| chr2 | 16571889 | 16571903 | CSAR_peak_ | 8.65 -         |
| chr2 | 16571911 | 16571970 | CSAR_peak_ | 7.26,6.85 -    |
| chr2 | 16572012 | 16572027 | CSAR_peak_ | 18.95 -        |
| chr2 | 16572118 | 16572172 | CSAR_peak_ | 24.21,6.57 -   |
| chr2 | 16572500 | 16572513 | CSAR_peak_ | 9.32 -         |
| chr2 | 16572637 | 16572768 | CSAR_peak_ | 10.88,7.73 -   |
| chr2 | 16579789 | 16579853 | CSAR_peak_ | 9.58,6.21,12.- |
| chr2 | 16580735 | 16580790 | CSAR_peak_ | 7.27 -         |
| chr2 | 16580948 | 16580974 | CSAR_peak_ | 6.21 -         |
| chr2 | 16581326 | 16581373 | CSAR_peak_ | 7.27 -         |
| chr2 | 16598701 | 16598746 | CSAR_peak_ | 12.13,6.85 -   |
| chr2 | 16598864 | 16598905 | CSAR_peak_ | 9.58,9.58 -    |
| chr2 | 16599192 | 16599237 | CSAR_peak_ | 7.27 -         |
| chr2 | 16599285 | 16599334 | CSAR_peak_ | 9.58 -         |
| chr2 | 16599752 | 16599791 | CSAR_peak_ | 7.27 -         |
| chr2 | 16600061 | 16600136 | CSAR_peak_ | 8.39 -         |
| chr2 | 16600403 | 16600446 | CSAR_peak_ | 6.21 -         |
| chr2 | 16601961 | 16602044 | CSAR_peak_ | 11.14 -        |
| chr2 | 16602334 | 16602373 | CSAR_peak_ | 7.27,6.95 -    |
| chr2 | 16602520 | 16602584 | CSAR_peak_ | 7.92,6.44 -    |
| chr2 | 16602880 | 16602906 | CSAR_peak_ | 7.27 -         |
| chr2 | 16611777 | 16611827 | CSAR_peak_ | 8.39 -         |
| chr2 | 16663489 | 16663551 | CSAR_peak_ | 6.21 -         |
| chr2 | 16672997 | 16673077 | CSAR_peak_ | 12.13 -        |
| chr2 | 16673589 | 16673655 | CSAR_peak_ | 13.48 -        |
| chr2 | 16673830 | 16673876 | CSAR_peak_ | 12.13 -        |
| chr2 | 16677879 | 16677928 | CSAR_peak_ | 8.39 -         |
| chr2 | 16678035 | 16678085 | CSAR_peak_ | 6.21 -         |
| chr2 | 16679745 | 16679783 | CSAR_peak_ | 12.13 -        |
| chr2 | 16679854 | 16679917 | CSAR_peak_ | 14.88,7,20.4:- |
| chr2 | 16679947 | 16679969 | CSAR_peak_ | 6.44 -         |
| chr2 | 16680040 | 16680092 | CSAR_peak_ | 6.03 -         |
| chr2 | 16680166 | 16680236 | CSAR_peak_ | 8.39,7.27 -    |
| chr2 | 16683281 | 16683331 | CSAR_peak_ | 10.95 -        |
| chr2 | 16684135 | 16684199 | CSAR_peak_ | 19.36 -        |
| chr2 | 16684284 | 16684339 | CSAR_peak_ | 9.58 -         |
| chr2 | 16684977 | 16685014 | CSAR_peak_ | 7.27 -         |
| chr2 | 16685190 | 16685294 | CSAR_peak_ | 6.21,8.39 -    |
| chr2 | 16685649 | 16685665 | CSAR_peak_ | 6.21 -         |
| chr2 | 16685754 | 16685808 | CSAR_peak_ | 7.27 -         |

|      |          |          |            |                |   |
|------|----------|----------|------------|----------------|---|
| chr2 | 16685903 | 16685958 | CSAR_peak_ | 6.81           | - |
| chr2 | 16686201 | 16686241 | CSAR_peak_ | 14.88,7.27     | - |
| chr2 | 16686346 | 16686398 | CSAR_peak_ | 9.77,7.58      | - |
| chr2 | 16688448 | 16688562 | CSAR_peak_ | 8.39,9.58      | - |
| chr2 | 16688702 | 16688774 | CSAR_peak_ | 13.48          | - |
| chr2 | 16689113 | 16689215 | CSAR_peak_ | 7.27,9.58      | - |
| chr2 | 16699027 | 16699069 | CSAR_peak_ | 7.27           | - |
| chr2 | 16700542 | 16700616 | CSAR_peak_ | 12.13,14.34    | - |
| chr2 | 16700639 | 16700782 | CSAR_peak_ | 26.51,18.9     | - |
| chr2 | 16700793 | 16701253 | CSAR_peak_ | 8.01,19.28,4.1 | - |
| chr2 | 16701274 | 16701360 | CSAR_peak_ | 10.83          | - |
| chr2 | 16701395 | 16701458 | CSAR_peak_ | 37.16,44.26    | - |
| chr2 | 16701484 | 16701557 | CSAR_peak_ | 11.64,13.56    | - |
| chr2 | 16701563 | 16701888 | CSAR_peak_ | 25.85,28.38,1  | - |
| chr2 | 16701898 | 16702004 | CSAR_peak_ | 18.73,14.3     | - |
| chr2 | 16734539 | 16734560 | CSAR_peak_ | 9.58           | - |
| chr2 | 16734671 | 16734731 | CSAR_peak_ | 9.58,12.17     | - |
| chr2 | 16734795 | 16734884 | CSAR_peak_ | 17.68,8.94     | - |
| chr2 | 16822149 | 16822560 | CSAR_peak_ | 13.85,36.89,1  | - |
| chr2 | 16822670 | 16822726 | CSAR_peak_ | 18.65,10.96    | - |
| chr2 | 16822809 | 16822993 | CSAR_peak_ | 16.33,5.86,8.1 | - |
| chr2 | 16823020 | 16823114 | CSAR_peak_ | 28.34,29.4     | - |
| chr2 | 16823117 | 16823211 | CSAR_peak_ | 14.88,8.39     | - |
| chr2 | 16823312 | 16823380 | CSAR_peak_ | 8.9,19.48      | - |
| chr2 | 16823634 | 16823716 | CSAR_peak_ | 7.27           | - |
| chr2 | 16824055 | 16824149 | CSAR_peak_ | 12.13,13.66    | - |
| chr2 | 16824151 | 16824360 | CSAR_peak_ | 5.86,25.91,14  | - |
| chr2 | 16826388 | 16826437 | CSAR_peak_ | 7.58           | - |
| chr2 | 16827251 | 16827297 | CSAR_peak_ | 6.21           | - |
| chr2 | 16829367 | 16829422 | CSAR_peak_ | 7.27           | - |
| chr2 | 16829962 | 16830070 | CSAR_peak_ | 14.88          | - |
| chr2 | 16831516 | 16831539 | CSAR_peak_ | 10.18          | - |
| chr2 | 16831674 | 16831738 | CSAR_peak_ | 21.68,15.2     | - |
| chr2 | 16832517 | 16832578 | CSAR_peak_ | 7.27           | - |
| chr2 | 16845191 | 16845256 | CSAR_peak_ | 6.21           | - |
| chr2 | 16849009 | 16849091 | CSAR_peak_ | 12.13,6.21     | - |
| chr2 | 16855521 | 16855584 | CSAR_peak_ | 9.77           | - |
| chr2 | 16856000 | 16856058 | CSAR_peak_ | 10.83          | - |
| chr2 | 16856261 | 16856294 | CSAR_peak_ | 6.21           | - |
| chr2 | 16865195 | 16865248 | CSAR_peak_ | 8.39           | - |
| chr2 | 16880159 | 16880282 | CSAR_peak_ | 18.73,5.86,9.1 | - |
| chr2 | 16880402 | 16880490 | CSAR_peak_ | 7.27           | - |

|      |          |          |            |                |   |
|------|----------|----------|------------|----------------|---|
| chr2 | 16880592 | 16880644 | CSAR_peak_ | 7.58           | - |
| chr2 | 16881207 | 16881247 | CSAR_peak_ | 8.65           | - |
| chr2 | 16881348 | 16881390 | CSAR_peak_ | 6.21           | - |
| chr2 | 16881796 | 16881859 | CSAR_peak_ | 7.27,5.86      | - |
| chr2 | 16945997 | 16946055 | CSAR_peak_ | 7.27           | - |
| chr2 | 16946343 | 16946380 | CSAR_peak_ | 5.86           | - |
| chr2 | 16949250 | 16949294 | CSAR_peak_ | 9.58           | - |
| chr2 | 16950165 | 16950215 | CSAR_peak_ | 9.58           | - |
| chr2 | 16950346 | 16950412 | CSAR_peak_ | 8.39           | - |
| chr2 | 16963600 | 16963656 | CSAR_peak_ | 10.83          | - |
| chr2 | 16963894 | 16963958 | CSAR_peak_ | 12.13,8.39     | - |
| chr2 | 16964174 | 16964322 | CSAR_peak_ | 24.64,9.39,6.  | - |
| chr2 | 16989976 | 16990029 | CSAR_peak_ | 9.58           | - |
| chr2 | 16990214 | 16990278 | CSAR_peak_ | 22.56,8.39     | - |
| chr2 | 16990288 | 16990363 | CSAR_peak_ | 12.13          | - |
| chr2 | 16991145 | 16991197 | CSAR_peak_ | 8.14           | - |
| chr2 | 16992318 | 16992354 | CSAR_peak_ | 6.21           | - |
| chr2 | 16992735 | 16992794 | CSAR_peak_ | 12.17,14.88,.- | - |
| chr2 | 16992965 | 16993006 | CSAR_peak_ | 5.86           | - |
| chr2 | 16994613 | 16994686 | CSAR_peak_ | 16.33,14.88    | - |
| chr2 | 16994843 | 16994914 | CSAR_peak_ | 9.58,6.1       | - |
| chr2 | 16995389 | 16995435 | CSAR_peak_ | 8.39           | - |
| chr2 | 17013793 | 17013826 | CSAR_peak_ | 6.21           | - |
| chr2 | 17017594 | 17017635 | CSAR_peak_ | 7.27           | - |
| chr2 | 17021175 | 17021229 | CSAR_peak_ | 9.58           | - |
| chr2 | 17037213 | 17037276 | CSAR_peak_ | 22.56,6.57     | - |
| chr2 | 17038119 | 17038175 | CSAR_peak_ | 7.27           | - |
| chr2 | 17038492 | 17038552 | CSAR_peak_ | 8.14           | - |
| chr2 | 17038733 | 17038787 | CSAR_peak_ | 7.27           | - |
| chr2 | 17054035 | 17054118 | CSAR_peak_ | 7.92           | - |
| chr2 | 17056038 | 17056125 | CSAR_peak_ | 10.95          | - |
| chr2 | 17056561 | 17056619 | CSAR_peak_ | 6.21           | - |
| chr2 | 17063511 | 17063623 | CSAR_peak_ | 9.77,7.27,7.9- | - |
| chr2 | 17063859 | 17063966 | CSAR_peak_ | 14.88,10.83    | - |
| chr2 | 17064031 | 17064078 | CSAR_peak_ | 7.27           | - |
| chr2 | 17065428 | 17065531 | CSAR_peak_ | 12.13,10.83    | - |
| chr2 | 17075186 | 17075236 | CSAR_peak_ | 7.27           | - |
| chr2 | 17077445 | 17077498 | CSAR_peak_ | 7.73           | - |
| chr2 | 17078389 | 17078400 | CSAR_peak_ | 7.27           | - |
| chr2 | 17078481 | 17078516 | CSAR_peak_ | 8.39           | - |
| chr2 | 17079001 | 17079047 | CSAR_peak_ | 7.27           | - |
| chr2 | 17079120 | 17079184 | CSAR_peak_ | 10.83          | - |



|      |          |          |            |                |   |
|------|----------|----------|------------|----------------|---|
| chr2 | 17080597 | 17080693 | CSAR_peak_ | 18.65,24.21    | - |
| chr2 | 17080800 | 17080841 | CSAR_peak_ | 6.21           | - |
| chr2 | 17081554 | 17081630 | CSAR_peak_ | 9.58           | - |
| chr2 | 17082905 | 17083026 | CSAR_peak_ | 7.27,9.77      | - |
| chr2 | 17083214 | 17083263 | CSAR_peak_ | 7.27           | - |
| chr2 | 17083371 | 17083438 | CSAR_peak_ | 8.39           | - |
| chr2 | 17083935 | 17083981 | CSAR_peak_ | 7.27           | - |
| chr2 | 17084516 | 17084695 | CSAR_peak_ | 21.94,25.07    | - |
| chr2 | 17084742 | 17084757 | CSAR_peak_ | 7.92           | - |
| chr2 | 17084787 | 17084867 | CSAR_peak_ | 7.43,14.88,6.- | - |
| chr2 | 17084872 | 17084971 | CSAR_peak_ | 32.46,28.21    | - |
| chr2 | 17085205 | 17085302 | CSAR_peak_ | 13.44,20.94,-  | - |
| chr2 | 17085436 | 17085515 | CSAR_peak_ | 13.48          | - |
| chr2 | 17085539 | 17085583 | CSAR_peak_ | 7.27           | - |
| chr2 | 17085908 | 17085975 | CSAR_peak_ | 16.25,10.31    | - |
| chr2 | 17086581 | 17086653 | CSAR_peak_ | 9.58           | - |
| chr2 | 17111570 | 17111647 | CSAR_peak_ | 10.83          | - |
| chr2 | 17112254 | 17112342 | CSAR_peak_ | 17.82,19.36    | - |
| chr2 | 17113097 | 17113177 | CSAR_peak_ | 7.27           | - |
| chr2 | 17113741 | 17113833 | CSAR_peak_ | 24.21,21.94    | - |
| chr2 | 17113878 | 17113940 | CSAR_peak_ | 6.21           | - |
| chr2 | 17113992 | 17114044 | CSAR_peak_ | 9.58           | - |
| chr2 | 17114091 | 17114183 | CSAR_peak_ | 9.58,7.27      | - |
| chr2 | 17114298 | 17114487 | CSAR_peak_ | 37.55,25.91    | - |
| chr2 | 17200693 | 17200762 | CSAR_peak_ | 27.64,19.98    | - |
| chr2 | 17200811 | 17200921 | CSAR_peak_ | 9.72,14.85     | - |
| chr2 | 17200985 | 17201016 | CSAR_peak_ | 16.33,13.51    | - |
| chr2 | 17201088 | 17201173 | CSAR_peak_ | 12.31,9.58     | - |
| chr2 | 17201260 | 17201345 | CSAR_peak_ | 33.03,9.77,1(- | - |
| chr2 | 17201506 | 17201615 | CSAR_peak_ | 14.59,14.85    | - |
| chr2 | 17201930 | 17201954 | CSAR_peak_ | 9.34           | - |
| chr2 | 17201991 | 17202078 | CSAR_peak_ | 12.59,10.94,-  | - |
| chr2 | 17202271 | 17202331 | CSAR_peak_ | 19.36,19.36    | - |
| chr2 | 17202455 | 17202575 | CSAR_peak_ | 7.78,31.72     | - |
| chr2 | 17253729 | 17253775 | CSAR_peak_ | 6.21           | - |
| chr2 | 17262168 | 17262286 | CSAR_peak_ | 10.95,8.65     | - |
| chr2 | 17265838 | 17265930 | CSAR_peak_ | 17.82,12.13    | - |
| chr2 | 17266293 | 17266352 | CSAR_peak_ | 14.88          | - |
| chr2 | 17266559 | 17266637 | CSAR_peak_ | 21.24,19.98    | - |
| chr2 | 17266937 | 17267036 | CSAR_peak_ | 19.96,12.17    | - |
| chr2 | 17267103 | 17267230 | CSAR_peak_ | 9.58,22.56     | - |
| chr2 | 17267468 | 17267534 | CSAR_peak_ | 16.33,7.27     | - |

|      |          |          |            |               |   |
|------|----------|----------|------------|---------------|---|
| chr2 | 17290152 | 17290224 | CSAR_peak_ | 6.21          | - |
| chr2 | 17292151 | 17292201 | CSAR_peak_ | 8.39,5.86     | - |
| chr2 | 17294636 | 17294676 | CSAR_peak_ | 6.21          | - |
| chr2 | 17294789 | 17294841 | CSAR_peak_ | 6.21          | - |
| chr2 | 17295399 | 17295562 | CSAR_peak_ | 22.56,42.64   | - |
| chr2 | 17296011 | 17296110 | CSAR_peak_ | 14.93,31.19   | - |
| chr2 | 17298042 | 17298079 | CSAR_peak_ | 9.58          | - |
| chr2 | 17329800 | 17329855 | CSAR_peak_ | 6.21          | - |
| chr2 | 17330114 | 17330164 | CSAR_peak_ | 7.27          | - |
| chr2 | 17332513 | 17332562 | CSAR_peak_ | 7.27          | - |
| chr2 | 17333130 | 17333228 | CSAR_peak_ | 10.95,10.12   | - |
| chr2 | 17333286 | 17333423 | CSAR_peak_ | 18.61,13.44,1 | - |
| chr2 | 17333557 | 17333722 | CSAR_peak_ | 22.56,9.58    | - |
| chr2 | 17333904 | 17333978 | CSAR_peak_ | 18.73,19.98   | - |
| chr2 | 17334152 | 17334196 | CSAR_peak_ | 9.58          | - |
| chr2 | 17334221 | 17334281 | CSAR_peak_ | 10.83         | - |
| chr2 | 17334669 | 17334765 | CSAR_peak_ | 13.92,13.47   | - |
| chr2 | 17334804 | 17334898 | CSAR_peak_ | 7.27,14.88    | - |
| chr2 | 17334992 | 17335037 | CSAR_peak_ | 8.39          | - |
| chr2 | 17335072 | 17335156 | CSAR_peak_ | 7.27          | - |
| chr2 | 17335233 | 17335271 | CSAR_peak_ | 7.27          | - |
| chr2 | 17335324 | 17335472 | CSAR_peak_ | 10.95,13.51,1 | - |
| chr2 | 17337001 | 17337183 | CSAR_peak_ | 14,5.86,21.3! | - |
| chr2 | 17345631 | 17345678 | CSAR_peak_ | 6.21          | - |
| chr2 | 17349436 | 17349478 | CSAR_peak_ | 9.48          | - |
| chr2 | 17350180 | 17350222 | CSAR_peak_ | 9.58          | - |
| chr2 | 17350770 | 17350885 | CSAR_peak_ | 9.58,5.86,8.3 | - |
| chr2 | 17351227 | 17351279 | CSAR_peak_ | 10.83         | - |
| chr2 | 17351377 | 17351524 | CSAR_peak_ | 19.36,11.96   | - |
| chr2 | 17352019 | 17352130 | CSAR_peak_ | 7.27,7.92,7.2 | - |
| chr2 | 17352209 | 17352296 | CSAR_peak_ | 13.29,9.77    | - |
| chr2 | 17352298 | 17352374 | CSAR_peak_ | 7.27,8.95     | - |
| chr2 | 17352828 | 17352897 | CSAR_peak_ | 20.18,17.82   | - |
| chr2 | 17352935 | 17352951 | CSAR_peak_ | 8.14,7.34     | - |
| chr2 | 17353068 | 17353164 | CSAR_peak_ | 9.77,6.95,8.1 | - |
| chr2 | 17353411 | 17353462 | CSAR_peak_ | 15.9,10.95    | - |
| chr2 | 17353669 | 17353739 | CSAR_peak_ | 8.14          | - |
| chr2 | 17353889 | 17353957 | CSAR_peak_ | 9.58,6.95     | - |
| chr2 | 17354068 | 17354137 | CSAR_peak_ | 14.76,14.34   | - |
| chr2 | 17354504 | 17354568 | CSAR_peak_ | 9.58,7.27     | - |
| chr2 | 17354781 | 17354819 | CSAR_peak_ | 7.27,6.21     | - |
| chr2 | 17354896 | 17354901 | CSAR_peak_ | 6.21          | - |

|      |          |          |            |                |   |
|------|----------|----------|------------|----------------|---|
| chr2 | 17354962 | 17355027 | CSAR_peak_ | 6.22,9.58      | - |
| chr2 | 17355565 | 17355689 | CSAR_peak_ | 18.73,13.29    | - |
| chr2 | 17355781 | 17355858 | CSAR_peak_ | 13.29,42.64    | - |
| chr2 | 17355888 | 17355919 | CSAR_peak_ | 6.21           | - |
| chr2 | 17355933 | 17356009 | CSAR_peak_ | 17.82,8.65     | - |
| chr2 | 17356112 | 17356337 | CSAR_peak_ | 34.93,29.69    | - |
| chr2 | 17356519 | 17356690 | CSAR_peak_ | 19.36,13.48,   | - |
| chr2 | 17356922 | 17356963 | CSAR_peak_ | 9.58           | - |
| chr2 | 17357048 | 17357118 | CSAR_peak_ | 9.58,16.33     | - |
| chr2 | 17376357 | 17376410 | CSAR_peak_ | 19.36,7.58     | - |
| chr2 | 17376489 | 17376613 | CSAR_peak_ | 12.17,12.31    | - |
| chr2 | 17377126 | 17377181 | CSAR_peak_ | 7.29,6.02      | - |
| chr2 | 17377286 | 17377355 | CSAR_peak_ | 6.81,12.13     | - |
| chr2 | 17377464 | 17377533 | CSAR_peak_ | 17.82          | - |
| chr2 | 17378099 | 17378155 | CSAR_peak_ | 8.65           | - |
| chr2 | 17378526 | 17378580 | CSAR_peak_ | 8.39           | - |
| chr2 | 17383417 | 17383489 | CSAR_peak_ | 10.31          | - |
| chr2 | 17383769 | 17383843 | CSAR_peak_ | 7.27           | - |
| chr2 | 17384056 | 17384090 | CSAR_peak_ | 14.88          | - |
| chr2 | 17384339 | 17384422 | CSAR_peak_ | 7,12.74,9.58,- | - |
| chr2 | 17385001 | 17385042 | CSAR_peak_ | 10.83          | - |
| chr2 | 17385397 | 17385475 | CSAR_peak_ | 8.39           | - |
| chr2 | 17385690 | 17385728 | CSAR_peak_ | 6.57           | - |
| chr2 | 17386101 | 17386160 | CSAR_peak_ | 8.14           | - |
| chr2 | 17386325 | 17386369 | CSAR_peak_ | 6.21           | - |
| chr2 | 17389362 | 17389429 | CSAR_peak_ | 7.27           | - |
| chr2 | 17389707 | 17389762 | CSAR_peak_ | 12.13,14.88    | - |
| chr2 | 17390502 | 17390564 | CSAR_peak_ | 8.95,17.82     | - |
| chr2 | 17391097 | 17391162 | CSAR_peak_ | 8.14           | - |
| chr2 | 17391745 | 17391794 | CSAR_peak_ | 13.48,8.28     | - |
| chr2 | 17391985 | 17392090 | CSAR_peak_ | 8.13,14.08     | - |
| chr2 | 17393015 | 17393062 | CSAR_peak_ | 9.58           | - |
| chr2 | 17393190 | 17393242 | CSAR_peak_ | 16.33          | - |
| chr2 | 17393875 | 17393919 | CSAR_peak_ | 6.03           | - |
| chr2 | 17395785 | 17395856 | CSAR_peak_ | 20.43,13.44    | - |
| chr2 | 17402805 | 17402870 | CSAR_peak_ | 7,6.81         | - |
| chr2 | 17411177 | 17411316 | CSAR_peak_ | 17.82,17.82    | - |
| chr2 | 17411695 | 17411731 | CSAR_peak_ | 9.58           | - |
| chr2 | 17412250 | 17412295 | CSAR_peak_ | 6.1            | - |
| chr2 | 17412402 | 17412465 | CSAR_peak_ | 12.31,11.38    | - |
| chr2 | 17413428 | 17413488 | CSAR_peak_ | 18.73          | - |
| chr2 | 17413747 | 17413808 | CSAR_peak_ | 6.03           | - |

|      |          |          |            |                |   |
|------|----------|----------|------------|----------------|---|
| chr2 | 17414123 | 17414192 | CSAR_peak_ | 12.74,17.82    | - |
| chr2 | 17414570 | 17414617 | CSAR_peak_ | 8.95,17.37     | - |
| chr2 | 17414698 | 17414729 | CSAR_peak_ | 6.03,6.21      | - |
| chr2 | 17414852 | 17414914 | CSAR_peak_ | 13.48          | - |
| chr2 | 17415005 | 17415056 | CSAR_peak_ | 7.34,6.21      | - |
| chr2 | 17415247 | 17415346 | CSAR_peak_ | 7.27,7.27      | - |
| chr2 | 17415678 | 17415687 | CSAR_peak_ | 6.95           | - |
| chr2 | 17415807 | 17415954 | CSAR_peak_ | 16.33,7.27     | - |
| chr2 | 17416241 | 17416291 | CSAR_peak_ | 6.21           | - |
| chr2 | 17416413 | 17416480 | CSAR_peak_ | 7.27,9.58      | - |
| chr2 | 17416619 | 17416708 | CSAR_peak_ | 7.58,10.83     | - |
| chr2 | 17416829 | 17416945 | CSAR_peak_ | 8.39           | - |
| chr2 | 17429596 | 17429654 | CSAR_peak_ | 17.82          | - |
| chr2 | 17429670 | 17429724 | CSAR_peak_ | 7.27           | - |
| chr2 | 17429876 | 17429999 | CSAR_peak_ | 17.82,9.58     | - |
| chr2 | 17430102 | 17430189 | CSAR_peak_ | 22.74,14.76    | - |
| chr2 | 17430401 | 17430488 | CSAR_peak_ | 12.17          | - |
| chr2 | 17430866 | 17430913 | CSAR_peak_ | 8.94           | - |
| chr2 | 17431034 | 17431184 | CSAR_peak_ | 14.88,12.27,;- | - |
| chr2 | 17431347 | 17431436 | CSAR_peak_ | 7.58,9.77      | - |
| chr2 | 17431553 | 17431614 | CSAR_peak_ | 7.27           | - |
| chr2 | 17431975 | 17432030 | CSAR_peak_ | 9.58           | - |
| chr2 | 17432165 | 17432176 | CSAR_peak_ | 7.27           | - |
| chr2 | 17432262 | 17432304 | CSAR_peak_ | 11.14          | - |
| chr2 | 17432505 | 17432606 | CSAR_peak_ | 13.48,10.83    | - |
| chr2 | 17432967 | 17433016 | CSAR_peak_ | 8.39           | - |
| chr2 | 17433521 | 17433602 | CSAR_peak_ | 21.94          | - |
| chr2 | 17433802 | 17433838 | CSAR_peak_ | 6.03,6.52      | - |
| chr2 | 17434230 | 17434275 | CSAR_peak_ | 9.58           | - |
| chr2 | 17434711 | 17434771 | CSAR_peak_ | 8.65,9.58      | - |
| chr2 | 17435100 | 17435142 | CSAR_peak_ | 10.31          | - |
| chr2 | 17435227 | 17435284 | CSAR_peak_ | 14.76,10.83    | - |
| chr2 | 17435605 | 17435657 | CSAR_peak_ | 9.58           | - |
| chr2 | 17435973 | 17436179 | CSAR_peak_ | 30.81,20.76,;- | - |
| chr2 | 17451856 | 17451896 | CSAR_peak_ | 6.21           | - |
| chr2 | 17454361 | 17454411 | CSAR_peak_ | 9.58           | - |
| chr2 | 17454996 | 17455047 | CSAR_peak_ | 10.82          | - |
| chr2 | 17455056 | 17455066 | CSAR_peak_ | 7.27           | - |
| chr2 | 17455879 | 17455932 | CSAR_peak_ | 8.39           | - |
| chr2 | 17456447 | 17456509 | CSAR_peak_ | 7.27,8.39      | - |
| chr2 | 17459927 | 17459985 | CSAR_peak_ | 7.27           | - |
| chr2 | 17460824 | 17460874 | CSAR_peak_ | 9.58           | - |

|      |          |          |            |                  |   |
|------|----------|----------|------------|------------------|---|
| chr2 | 17472188 | 17472254 | CSAR_peak_ | 6.21             | - |
| chr2 | 17472431 | 17472492 | CSAR_peak_ | 8.39             | - |
| chr2 | 17512633 | 17512684 | CSAR_peak_ | 14.88            | - |
| chr2 | 17512955 | 17512997 | CSAR_peak_ | 9.58,7.27        | - |
| chr2 | 17513032 | 17513140 | CSAR_peak_ | 6.21             | - |
| chr2 | 17513189 | 17513232 | CSAR_peak_ | 6.21             | - |
| chr2 | 17513234 | 17513294 | CSAR_peak_ | 7.27,12.13       | - |
| chr2 | 17513700 | 17513788 | CSAR_peak_ | 10.83            | - |
| chr2 | 17515080 | 17515151 | CSAR_peak_ | 6.21             | - |
| chr2 | 17515252 | 17515332 | CSAR_peak_ | 10.83,7.27       | - |
| chr2 | 17515467 | 17515564 | CSAR_peak_ | 10.83,8.39       | - |
| chr2 | 17515629 | 17515667 | CSAR_peak_ | 6.21             | - |
| chr2 | 17515898 | 17515986 | CSAR_peak_ | 8.39,6.03        | - |
| chr2 | 17516258 | 17516323 | CSAR_peak_ | 17.82            | - |
| chr2 | 17516480 | 17516571 | CSAR_peak_ | 7.58,7.27        | - |
| chr2 | 17516734 | 17516866 | CSAR_peak_ | 6.57             | - |
| chr2 | 17517259 | 17517327 | CSAR_peak_ | 6.02,17.82       | - |
| chr2 | 17517513 | 17517586 | CSAR_peak_ | 14.88            | - |
| chr2 | 17517594 | 17517642 | CSAR_peak_ | 10.83            | - |
| chr2 | 17517935 | 17518036 | CSAR_peak_ | 16.33,13.51,6.21 | - |
| chr2 | 17518058 | 17518100 | CSAR_peak_ | 6.57             | - |
| chr2 | 17518372 | 17518422 | CSAR_peak_ | 7.27,6.21        | - |
| chr2 | 17518896 | 17518948 | CSAR_peak_ | 8.65             | - |
| chr2 | 17518963 | 17519018 | CSAR_peak_ | 12.13            | - |
| chr2 | 17525126 | 17525199 | CSAR_peak_ | 16.33            | - |
| chr2 | 17533232 | 17533275 | CSAR_peak_ | 7.27             | - |
| chr2 | 17533457 | 17533538 | CSAR_peak_ | 14.88,16.11      | - |
| chr2 | 17533564 | 17533630 | CSAR_peak_ | 14.88,9.58       | - |
| chr2 | 17533697 | 17533767 | CSAR_peak_ | 10.83,8.92       | - |
| chr2 | 17534181 | 17534240 | CSAR_peak_ | 7.27             | - |
| chr2 | 17534266 | 17534318 | CSAR_peak_ | 8.2              | - |
| chr2 | 17534644 | 17534680 | CSAR_peak_ | 8.39             | - |
| chr2 | 17534788 | 17534845 | CSAR_peak_ | 7.27,6.21        | - |
| chr2 | 17534951 | 17534993 | CSAR_peak_ | 19.96            | - |
| chr2 | 17536810 | 17536854 | CSAR_peak_ | 6.21             | - |
| chr2 | 17539722 | 17539772 | CSAR_peak_ | 8.39             | - |
| chr2 | 17550259 | 17550316 | CSAR_peak_ | 6.44             | - |
| chr2 | 17574828 | 17574880 | CSAR_peak_ | 9.58,6.21        | - |
| chr2 | 17575807 | 17575857 | CSAR_peak_ | 7.27             | - |
| chr2 | 17576160 | 17576267 | CSAR_peak_ | 31.73,17.37      | - |
| chr2 | 17593250 | 17593301 | CSAR_peak_ | 6.21             | - |
| chr2 | 17593660 | 17593764 | CSAR_peak_ | 6.21,8.39        | - |

|      |          |          |            |                  |   |
|------|----------|----------|------------|------------------|---|
| chr2 | 17610788 | 17610841 | CSAR_peak_ | 12.13            | - |
| chr2 | 17611286 | 17611337 | CSAR_peak_ | 12.17            | - |
| chr2 | 17611348 | 17611378 | CSAR_peak_ | 6.57             | - |
| chr2 | 17611417 | 17611484 | CSAR_peak_ | 9.77,7.27        | - |
| chr2 | 17611732 | 17611820 | CSAR_peak_ | 27.64            | - |
| chr2 | 17611902 | 17611952 | CSAR_peak_ | 11.66            | - |
| chr2 | 17612041 | 17612100 | CSAR_peak_ | 16.33            | - |
| chr2 | 17612195 | 17612217 | CSAR_peak_ | 9.58             | - |
| chr2 | 17632002 | 17632082 | CSAR_peak_ | 13.48            | - |
| chr2 | 17632122 | 17632300 | CSAR_peak_ | 14.76,10.83      | - |
| chr2 | 17632780 | 17632816 | CSAR_peak_ | 6.21             | - |
| chr2 | 17633117 | 17633206 | CSAR_peak_ | 14.76,12.13      | - |
| chr2 | 17633233 | 17633335 | CSAR_peak_ | 25.91,14.88      | - |
| chr2 | 17633499 | 17633566 | CSAR_peak_ | 7.27             | - |
| chr2 | 17633656 | 17633723 | CSAR_peak_ | 6.21             | - |
| chr2 | 17633750 | 17633860 | CSAR_peak_ | 13.48            | - |
| chr2 | 17647823 | 17647906 | CSAR_peak_ | 16.11,7.58,10.83 | - |
| chr2 | 17648086 | 17648092 | CSAR_peak_ | 6.21             | - |
| chr2 | 17652020 | 17652028 | CSAR_peak_ | 7                | - |
| chr2 | 17652207 | 17652267 | CSAR_peak_ | 6.21,8.39        | - |
| chr2 | 17655042 | 17655101 | CSAR_peak_ | 6.81             | - |
| chr2 | 17656250 | 17656302 | CSAR_peak_ | 8.39             | - |
| chr2 | 17692641 | 17692729 | CSAR_peak_ | 8.39             | - |
| chr2 | 17693452 | 17693542 | CSAR_peak_ | 12.13,7.27       | - |
| chr2 | 17697991 | 17698229 | CSAR_peak_ | 12.13,9.58,24.88 | - |
| chr2 | 17698258 | 17698321 | CSAR_peak_ | 9.58,9.58        | - |
| chr2 | 17698698 | 17698768 | CSAR_peak_ | 12.13            | - |
| chr2 | 17699179 | 17699243 | CSAR_peak_ | 7.27             | - |
| chr2 | 17699554 | 17699595 | CSAR_peak_ | 12.13            | - |
| chr2 | 17699835 | 17699874 | CSAR_peak_ | 12.13            | - |
| chr2 | 17700103 | 17700175 | CSAR_peak_ | 8.94,7.58        | - |
| chr2 | 17701168 | 17701259 | CSAR_peak_ | 13.44,17.37      | - |
| chr2 | 17709261 | 17709363 | CSAR_peak_ | 23.95,19.96      | - |
| chr2 | 17709383 | 17709431 | CSAR_peak_ | 17.37,17.68      | - |
| chr2 | 17709467 | 17709511 | CSAR_peak_ | 10.83            | - |
| chr2 | 17709728 | 17709809 | CSAR_peak_ | 8.39,9.72,7.27   | - |
| chr2 | 17709820 | 17709892 | CSAR_peak_ | 11.14,7.27       | - |
| chr2 | 17711368 | 17711406 | CSAR_peak_ | 9.58             | - |
| chr2 | 17711434 | 17711457 | CSAR_peak_ | 9.58             | - |
| chr2 | 17711844 | 17711895 | CSAR_peak_ | 7.92,7.27        | - |
| chr2 | 17731569 | 17731633 | CSAR_peak_ | 6.21,9.58        | - |
| chr2 | 17731933 | 17732440 | CSAR_peak_ | 54.66,8.14,39.58 | - |

|      |          |          |            |                |
|------|----------|----------|------------|----------------|
| chr2 | 17732513 | 17732709 | CSAR_peak_ | 32.72,43.44,-  |
| chr2 | 17732753 | 17733259 | CSAR_peak_ | 31.12,64,6.8:- |
| chr2 | 17733350 | 17733649 | CSAR_peak_ | 25.34,38.35,t- |
| chr2 | 17733703 | 17733801 | CSAR_peak_ | 20.13,11.14 -  |
| chr2 | 17733807 | 17733842 | CSAR_peak_ | 6.21 -         |
| chr2 | 17735697 | 17735732 | CSAR_peak_ | 7.27 -         |
| chr2 | 17736169 | 17736220 | CSAR_peak_ | 17.82,8.39 -   |
| chr2 | 17737602 | 17737652 | CSAR_peak_ | 14.88 -        |
| chr2 | 17737655 | 17737697 | CSAR_peak_ | 7.27 -         |
| chr2 | 17737786 | 17737801 | CSAR_peak_ | 9.58 -         |
| chr2 | 17738121 | 17738142 | CSAR_peak_ | 6.03 -         |
| chr2 | 17796514 | 17796588 | CSAR_peak_ | 13.48,7 -      |
| chr2 | 17796714 | 17796759 | CSAR_peak_ | 7.34 -         |
| chr2 | 17796798 | 17796866 | CSAR_peak_ | 9.58,7.27 -    |
| chr2 | 17796962 | 17797196 | CSAR_peak_ | 48.73,8.28,6.- |
| chr2 | 17803233 | 17803287 | CSAR_peak_ | 9.58 -         |
| chr2 | 17803361 | 17803492 | CSAR_peak_ | 13.85,12.17 -  |
| chr2 | 17803573 | 17803612 | CSAR_peak_ | 7.27 -         |
| chr2 | 17804018 | 17804070 | CSAR_peak_ | 11.38,9.77 -   |
| chr2 | 17804164 | 17804216 | CSAR_peak_ | 5.86 -         |
| chr2 | 17804717 | 17804770 | CSAR_peak_ | 6.81 -         |
| chr2 | 17805821 | 17805909 | CSAR_peak_ | 10.95 -        |
| chr2 | 17812967 | 17812995 | CSAR_peak_ | 6.21 -         |
| chr2 | 17813085 | 17813125 | CSAR_peak_ | 7.27,9.58 -    |
| chr2 | 17814113 | 17814188 | CSAR_peak_ | 9.58 -         |
| chr2 | 17815400 | 17815441 | CSAR_peak_ | 6.21 -         |
| chr2 | 17815876 | 17815953 | CSAR_peak_ | 9.58 -         |
| chr2 | 17840674 | 17840756 | CSAR_peak_ | 10.83 -        |
| chr2 | 17840821 | 17840867 | CSAR_peak_ | 10.83,6.02 -   |
| chr2 | 17840934 | 17840994 | CSAR_peak_ | 8.39,7.27 -    |
| chr2 | 17841143 | 17841236 | CSAR_peak_ | 26.37,30.81 -  |
| chr2 | 17841485 | 17841549 | CSAR_peak_ | 7.27,7.27 -    |
| chr2 | 17841996 | 17842060 | CSAR_peak_ | 6.81,8.39 -    |
| chr2 | 17842264 | 17842320 | CSAR_peak_ | 6.21 -         |
| chr2 | 17842380 | 17842434 | CSAR_peak_ | 7.58,5.62 -    |
| chr2 | 17842683 | 17842801 | CSAR_peak_ | 17.82,7.27 -   |
| chr2 | 17843134 | 17843189 | CSAR_peak_ | 9.58 -         |
| chr2 | 17843383 | 17843477 | CSAR_peak_ | 6.21,7.27,6.2- |
| chr2 | 17911278 | 17911348 | CSAR_peak_ | 9.58 -         |
| chr2 | 17911440 | 17911492 | CSAR_peak_ | 7.58 -         |
| chr2 | 17912931 | 17912991 | CSAR_peak_ | 7.58 -         |
| chr2 | 17932402 | 17932457 | CSAR_peak_ | 17.51,13.44 -  |

|      |          |          |            |                   |   |
|------|----------|----------|------------|-------------------|---|
| chr2 | 17932536 | 17932602 | CSAR_peak_ | 12.13,7.27,10.81  | - |
| chr2 | 17932745 | 17932877 | CSAR_peak_ | 16.78,17.82       | - |
| chr2 | 17933648 | 17933706 | CSAR_peak_ | 12.13,8.39        | - |
| chr2 | 17933869 | 17933939 | CSAR_peak_ | 6.81              | - |
| chr2 | 17969391 | 17969452 | CSAR_peak_ | 7.27,7.27         | - |
| chr2 | 17971582 | 17971631 | CSAR_peak_ | 9.58,8.39         | - |
| chr2 | 17996940 | 17997022 | CSAR_peak_ | 19.21,10.33       | - |
| chr2 | 17997194 | 17997292 | CSAR_peak_ | 8.39,12.31        | - |
| chr2 | 17998325 | 17998352 | CSAR_peak_ | 7.27              | - |
| chr2 | 17998836 | 17998878 | CSAR_peak_ | 7.27              | - |
| chr2 | 18009774 | 18009824 | CSAR_peak_ | 7.27              | - |
| chr2 | 18018242 | 18018383 | CSAR_peak_ | 46.52,49.98       | - |
| chr2 | 18018470 | 18018653 | CSAR_peak_ | 9.4,8.92,26.7     | - |
| chr2 | 18025526 | 18025561 | CSAR_peak_ | 6.21              | - |
| chr2 | 18026401 | 18026456 | CSAR_peak_ | 6.21,7.92         | - |
| chr2 | 18026480 | 18026520 | CSAR_peak_ | 7.27              | - |
| chr2 | 18026635 | 18026679 | CSAR_peak_ | 7.27              | - |
| chr2 | 18027593 | 18027651 | CSAR_peak_ | 8.39              | - |
| chr2 | 18027677 | 18027700 | CSAR_peak_ | 7.92              | - |
| chr2 | 18027924 | 18028021 | CSAR_peak_ | 11.96,12.59,10.81 | - |
| chr2 | 18028094 | 18028153 | CSAR_peak_ | 21.94             | - |
| chr2 | 18028260 | 18028332 | CSAR_peak_ | 17.82,18.95       | - |
| chr2 | 18028848 | 18028909 | CSAR_peak_ | 12.13,13.44       | - |
| chr2 | 18029106 | 18029289 | CSAR_peak_ | 11.28,8.14,10.81  | - |
| chr2 | 18029450 | 18029496 | CSAR_peak_ | 7.27              | - |
| chr2 | 18029638 | 18029680 | CSAR_peak_ | 7.27              | - |
| chr2 | 18030292 | 18030372 | CSAR_peak_ | 9.58              | - |
| chr2 | 18030479 | 18030529 | CSAR_peak_ | 8.39              | - |
| chr2 | 18030720 | 18030883 | CSAR_peak_ | 12.13,9.58,8.39   | - |
| chr2 | 18030886 | 18030934 | CSAR_peak_ | 7.27              | - |
| chr2 | 18033544 | 18033594 | CSAR_peak_ | 9.58              | - |
| chr2 | 18035560 | 18035616 | CSAR_peak_ | 7.34              | - |
| chr2 | 18035668 | 18035716 | CSAR_peak_ | 9.77,16.33        | - |
| chr2 | 18035828 | 18035887 | CSAR_peak_ | 16.33             | - |
| chr2 | 18036754 | 18036848 | CSAR_peak_ | 31.19             | - |
| chr2 | 18037138 | 18037153 | CSAR_peak_ | 6.02              | - |
| chr2 | 18037237 | 18037327 | CSAR_peak_ | 12.31             | - |
| chr2 | 18046834 | 18046879 | CSAR_peak_ | 7.27              | - |
| chr2 | 18046899 | 18046926 | CSAR_peak_ | 7.27              | - |
| chr2 | 18047290 | 18047318 | CSAR_peak_ | 7.27              | - |
| chr2 | 18058142 | 18058192 | CSAR_peak_ | 7.92              | - |
| chr2 | 18073994 | 18074075 | CSAR_peak_ | 7.27              | - |



|      |          |          |            |                  |   |
|------|----------|----------|------------|------------------|---|
| chr2 | 18074212 | 18074299 | CSAR_peak_ | 16,10.94,5.9     | - |
| chr2 | 18074353 | 18074411 | CSAR_peak_ | 11.63            | - |
| chr2 | 18074529 | 18074559 | CSAR_peak_ | 7.27             | - |
| chr2 | 18074571 | 18074604 | CSAR_peak_ | 12.13            | - |
| chr2 | 18074629 | 18074705 | CSAR_peak_ | 28.34,17.4       | - |
| chr2 | 18074887 | 18074949 | CSAR_peak_ | 7.27,9.77        | - |
| chr2 | 18130913 | 18130995 | CSAR_peak_ | 17.51,8.65       | - |
| chr2 | 18131492 | 18131536 | CSAR_peak_ | 7.27             | - |
| chr2 | 18131639 | 18131673 | CSAR_peak_ | 7.27             | - |
| chr2 | 18160220 | 18160276 | CSAR_peak_ | 8.39             | - |
| chr2 | 18160588 | 18160621 | CSAR_peak_ | 6.21             | - |
| chr2 | 18160758 | 18160866 | CSAR_peak_ | 7.27             | - |
| chr2 | 18161001 | 18161102 | CSAR_peak_ | 14.76,19.36      | - |
| chr2 | 18161231 | 18161300 | CSAR_peak_ | 8.65,14.88       | - |
| chr2 | 18161400 | 18161458 | CSAR_peak_ | 6.21             | - |
| chr2 | 18178815 | 18178879 | CSAR_peak_ | 12.17            | - |
| chr2 | 18179489 | 18179585 | CSAR_peak_ | 9.72,7.27        | - |
| chr2 | 18179657 | 18179696 | CSAR_peak_ | 6.21             | - |
| chr2 | 18179796 | 18179868 | CSAR_peak_ | 12.13,11.14      | - |
| chr2 | 18179959 | 18180111 | CSAR_peak_ | 7.27,7.27        | - |
| chr2 | 18180114 | 18180150 | CSAR_peak_ | 7.27             | - |
| chr2 | 18180233 | 18180357 | CSAR_peak_ | 6.21,13.48,11.14 | - |
| chr2 | 18180450 | 18180484 | CSAR_peak_ | 8.39             | - |
| chr2 | 18180509 | 18180594 | CSAR_peak_ | 16.55,15.2       | - |
| chr2 | 18181007 | 18181114 | CSAR_peak_ | 18.95,7.34       | - |
| chr2 | 18181324 | 18181405 | CSAR_peak_ | 19.36,12.31      | - |
| chr2 | 18181501 | 18181588 | CSAR_peak_ | 6.02,12.23,11.14 | - |
| chr2 | 18181737 | 18181781 | CSAR_peak_ | 10.82            | - |
| chr2 | 18181874 | 18181970 | CSAR_peak_ | 9.58,8.39        | - |
| chr2 | 18182118 | 18182183 | CSAR_peak_ | 6.44,7.58        | - |
| chr2 | 18182281 | 18182341 | CSAR_peak_ | 7.7              | - |
| chr2 | 18182346 | 18182417 | CSAR_peak_ | 20.43            | - |
| chr2 | 18182504 | 18182529 | CSAR_peak_ | 6.21             | - |
| chr2 | 18182841 | 18182900 | CSAR_peak_ | 9.77             | - |
| chr2 | 18183106 | 18183155 | CSAR_peak_ | 10.83            | - |
| chr2 | 18183239 | 18183338 | CSAR_peak_ | 14.88            | - |
| chr2 | 18183504 | 18183551 | CSAR_peak_ | 8.39             | - |
| chr2 | 18183759 | 18183800 | CSAR_peak_ | 7.27             | - |
| chr2 | 18184317 | 18184373 | CSAR_peak_ | 8.39,12.13       | - |
| chr2 | 18184698 | 18184810 | CSAR_peak_ | 10.95,8.39,6.21  | - |
| chr2 | 18185018 | 18185097 | CSAR_peak_ | 20.35,6.58       | - |
| chr2 | 18185209 | 18185256 | CSAR_peak_ | 17.37,7.92       | - |

|      |          |          |            |                  |   |
|------|----------|----------|------------|------------------|---|
| chr2 | 18185350 | 18185459 | CSAR_peak_ | 39.31,27.61      | - |
| chr2 | 18185607 | 18185715 | CSAR_peak_ | 14.88,17.67      | - |
| chr2 | 18185792 | 18185933 | CSAR_peak_ | 25.65,6.32,14.88 | - |
| chr2 | 18186006 | 18186051 | CSAR_peak_ | 17.82            | - |
| chr2 | 18186395 | 18186445 | CSAR_peak_ | 19.36            | - |
| chr2 | 18186484 | 18186511 | CSAR_peak_ | 8.52             | - |
| chr2 | 18186739 | 18186789 | CSAR_peak_ | 17.37,17.82      | - |
| chr2 | 18186852 | 18187009 | CSAR_peak_ | 67.97,40.87      | - |
| chr2 | 18190278 | 18190322 | CSAR_peak_ | 7.58             | - |
| chr2 | 18196257 | 18196282 | CSAR_peak_ | 7.27             | - |
| chr2 | 18196424 | 18196471 | CSAR_peak_ | 7.27             | - |
| chr2 | 18205787 | 18205847 | CSAR_peak_ | 6.02             | - |
| chr2 | 18205966 | 18206037 | CSAR_peak_ | 16.33            | - |
| chr2 | 18206283 | 18206324 | CSAR_peak_ | 8.14,7.92        | - |
| chr2 | 18206333 | 18206356 | CSAR_peak_ | 9.31,9.41        | - |
| chr2 | 18206433 | 18206481 | CSAR_peak_ | 10.12            | - |
| chr2 | 18206647 | 18206676 | CSAR_peak_ | 12.13            | - |
| chr2 | 18206774 | 18206850 | CSAR_peak_ | 24.21,7.58       | - |
| chr2 | 18206933 | 18206990 | CSAR_peak_ | 12.13,7.27       | - |
| chr2 | 18207181 | 18207186 | CSAR_peak_ | 7.27             | - |
| chr2 | 18207278 | 18207360 | CSAR_peak_ | 7.27,14.88       | - |
| chr2 | 18239450 | 18239489 | CSAR_peak_ | 6.21             | - |
| chr2 | 18249458 | 18249508 | CSAR_peak_ | 9.77             | - |
| chr2 | 18250275 | 18250334 | CSAR_peak_ | 7.26,8.39        | - |
| chr2 | 18255124 | 18255188 | CSAR_peak_ | 8.65,13.51       | - |
| chr2 | 18270040 | 18270099 | CSAR_peak_ | 12.13            | - |
| chr2 | 18270967 | 18271014 | CSAR_peak_ | 7.27             | - |
| chr2 | 18299218 | 18299303 | CSAR_peak_ | 8.39,6.21        | - |
| chr2 | 18412680 | 18412744 | CSAR_peak_ | 10.83            | - |
| chr2 | 18419690 | 18419720 | CSAR_peak_ | 7.27             | - |
| chr2 | 18419814 | 18419865 | CSAR_peak_ | 9.61,7.92        | - |
| chr2 | 18426754 | 18426838 | CSAR_peak_ | 9.77,7.27        | - |
| chr2 | 18427230 | 18427285 | CSAR_peak_ | 6.57             | - |
| chr2 | 18427328 | 18427366 | CSAR_peak_ | 7.27             | - |
| chr2 | 18427482 | 18427538 | CSAR_peak_ | 8.39             | - |
| chr2 | 18463061 | 18463150 | CSAR_peak_ | 9.77,9.58        | - |
| chr2 | 18467070 | 18467127 | CSAR_peak_ | 7.27             | - |
| chr2 | 18501305 | 18501385 | CSAR_peak_ | 14.88            | - |
| chr2 | 18501544 | 18501658 | CSAR_peak_ | 16.11,25.62      | - |
| chr2 | 18512489 | 18512540 | CSAR_peak_ | 10.83            | - |
| chr2 | 18513244 | 18513310 | CSAR_peak_ | 9.58,7.27        | - |
| chr2 | 18513539 | 18513585 | CSAR_peak_ | 6.57             | - |

|      |          |          |            |                |   |
|------|----------|----------|------------|----------------|---|
| chr2 | 18513641 | 18513669 | CSAR_peak_ | 8.39,7.27      | - |
| chr2 | 18513959 | 18514005 | CSAR_peak_ | 12.13,7.27     | - |
| chr2 | 18542380 | 18542467 | CSAR_peak_ | 10.83,17.82    | - |
| chr2 | 18542849 | 18542964 | CSAR_peak_ | 9.55,10.31,9.- | - |
| chr2 | 18543119 | 18543250 | CSAR_peak_ | 13.48          | - |
| chr2 | 18544146 | 18544206 | CSAR_peak_ | 13.48          | - |
| chr2 | 18544315 | 18544367 | CSAR_peak_ | 12.74          | - |
| chr2 | 18544714 | 18544774 | CSAR_peak_ | 8.39           | - |
| chr2 | 18545429 | 18545484 | CSAR_peak_ | 5.86,14.76     | - |
| chr2 | 18545937 | 18545950 | CSAR_peak_ | 9.58           | - |
| chr2 | 18546006 | 18546034 | CSAR_peak_ | 7.27           | - |
| chr2 | 18546096 | 18546134 | CSAR_peak_ | 6.03,12.13     | - |
| chr2 | 18546164 | 18546189 | CSAR_peak_ | 6.03           | - |
| chr2 | 18546208 | 18546290 | CSAR_peak_ | 7.27,8.14      | - |
| chr2 | 18547118 | 18547182 | CSAR_peak_ | 12.13,9.58     | - |
| chr2 | 18547280 | 18547360 | CSAR_peak_ | 12.13          | - |
| chr2 | 18551444 | 18551507 | CSAR_peak_ | 5.86,7.27      | - |
| chr2 | 18585745 | 18585799 | CSAR_peak_ | 5.86           | - |
| chr2 | 18586063 | 18586110 | CSAR_peak_ | 9.58           | - |
| chr2 | 18586419 | 18586465 | CSAR_peak_ | 14.88          | - |
| chr2 | 18596851 | 18596883 | CSAR_peak_ | 9.77           | - |
| chr2 | 18699814 | 18699880 | CSAR_peak_ | 13.48,17.82    | - |
| chr2 | 18699978 | 18700054 | CSAR_peak_ | 12.17          | - |
| chr2 | 18700174 | 18700227 | CSAR_peak_ | 14.76,13.85    | - |
| chr2 | 18700332 | 18700375 | CSAR_peak_ | 22.56,14.88    | - |
| chr2 | 18700449 | 18700488 | CSAR_peak_ | 12.31,7.58     | - |
| chr2 | 18700564 | 18700693 | CSAR_peak_ | 48.37,26.64    | - |
| chr2 | 18701381 | 18701476 | CSAR_peak_ | 13.48          | - |
| chr2 | 18701547 | 18701588 | CSAR_peak_ | 6.21           | - |
| chr2 | 18701966 | 18702017 | CSAR_peak_ | 6.57           | - |
| chr2 | 18750186 | 18750273 | CSAR_peak_ | 7.27           | - |
| chr2 | 18751490 | 18751521 | CSAR_peak_ | 9.58           | - |
| chr2 | 18751604 | 18751738 | CSAR_peak_ | 7.58,7.27      | - |
| chr2 | 18752011 | 18752048 | CSAR_peak_ | 7.27           | - |
| chr2 | 18752162 | 18752242 | CSAR_peak_ | 8.39           | - |
| chr2 | 18759679 | 18759737 | CSAR_peak_ | 20.94,12.13    | - |
| chr2 | 18760285 | 18760353 | CSAR_peak_ | 6.21           | - |
| chr2 | 18761006 | 18761075 | CSAR_peak_ | 29.4,18.73     | - |
| chr2 | 18761171 | 18761233 | CSAR_peak_ | 13.85,8.5      | - |
| chr2 | 18762268 | 18762317 | CSAR_peak_ | 9.58           | - |
| chr2 | 18762692 | 18762733 | CSAR_peak_ | 9.58           | - |
| chr2 | 18762981 | 18763060 | CSAR_peak_ | 12.31          | - |

|      |          |          |            |                |   |
|------|----------|----------|------------|----------------|---|
| chr2 | 18763090 | 18763122 | CSAR_peak_ | 9.58           | - |
| chr2 | 18763201 | 18763255 | CSAR_peak_ | 14.88          | - |
| chr2 | 18763893 | 18763945 | CSAR_peak_ | 16.19,25.91    | - |
| chr2 | 18765637 | 18765681 | CSAR_peak_ | 7.27           | - |
| chr2 | 18766653 | 18766705 | CSAR_peak_ | 8.95,16.33     | - |
| chr2 | 18766807 | 18766930 | CSAR_peak_ | 12.13,17.82    | - |
| chr2 | 18767085 | 18767182 | CSAR_peak_ | 18.35,6.94     | - |
| chr2 | 18768424 | 18768507 | CSAR_peak_ | 9.58,9.58      | - |
| chr2 | 18769716 | 18769807 | CSAR_peak_ | 14.88,6.21     | - |
| chr2 | 18771144 | 18771176 | CSAR_peak_ | 5.86           | - |
| chr2 | 18771633 | 18771683 | CSAR_peak_ | 7.27           | - |
| chr2 | 18776595 | 18776645 | CSAR_peak_ | 6.21           | - |
| chr2 | 18776951 | 18777012 | CSAR_peak_ | 9.58           | - |
| chr2 | 18799868 | 18799914 | CSAR_peak_ | 6.21           | - |
| chr2 | 18808159 | 18808222 | CSAR_peak_ | 9.58           | - |
| chr2 | 18808468 | 18808514 | CSAR_peak_ | 6.21           | - |
| chr2 | 18808536 | 18808568 | CSAR_peak_ | 9.58           | - |
| chr2 | 18808675 | 18808682 | CSAR_peak_ | 9.77           | - |
| chr2 | 18808697 | 18808737 | CSAR_peak_ | 8.39           | - |
| chr2 | 18808928 | 18808999 | CSAR_peak_ | 14.76,12.13    | - |
| chr2 | 18815146 | 18815207 | CSAR_peak_ | 27.83,6.48     | - |
| chr2 | 18815252 | 18815352 | CSAR_peak_ | 6.81,9.02,26.- | - |
| chr2 | 18815653 | 18815691 | CSAR_peak_ | 12.13          | - |
| chr2 | 18815697 | 18815746 | CSAR_peak_ | 12.13          | - |
| chr2 | 18815830 | 18815869 | CSAR_peak_ | 7.27           | - |
| chr2 | 18815991 | 18816039 | CSAR_peak_ | 6.01,6.21      | - |
| chr2 | 18816292 | 18816321 | CSAR_peak_ | 7.27           | - |
| chr2 | 18816531 | 18816585 | CSAR_peak_ | 8.28           | - |
| chr2 | 18817043 | 18817120 | CSAR_peak_ | 12.17,11.14    | - |
| chr2 | 18817167 | 18817281 | CSAR_peak_ | 9.77,12.13,6.- | - |
| chr2 | 18817387 | 18817447 | CSAR_peak_ | 7.27,7.27      | - |
| chr2 | 18817532 | 18817596 | CSAR_peak_ | 19.36          | - |
| chr2 | 18817662 | 18817727 | CSAR_peak_ | 6.57,9.58      | - |
| chr2 | 18817929 | 18818052 | CSAR_peak_ | 22.56,12.13,-  | - |
| chr2 | 18818105 | 18818179 | CSAR_peak_ | 7.27,8.28      | - |
| chr2 | 18828604 | 18828665 | CSAR_peak_ | 16.11          | - |
| chr2 | 18829119 | 18829169 | CSAR_peak_ | 9.58           | - |
| chr2 | 18837832 | 18837892 | CSAR_peak_ | 6.21           | - |
| chr2 | 18859972 | 18860023 | CSAR_peak_ | 8.39           | - |
| chr2 | 18860116 | 18860167 | CSAR_peak_ | 7.27,5.86      | - |
| chr2 | 18860778 | 18860868 | CSAR_peak_ | 7.27,5.86      | - |
| chr2 | 18861930 | 18861981 | CSAR_peak_ | 10.83          | - |

|      |          |          |            |              |   |
|------|----------|----------|------------|--------------|---|
| chr2 | 18862106 | 18862213 | CSAR_peak_ | 12.13        | - |
| chr2 | 18862275 | 18862343 | CSAR_peak_ | 14.88,7.27   | - |
| chr2 | 18862476 | 18862520 | CSAR_peak_ | 7.27         | - |
| chr2 | 18862680 | 18862747 | CSAR_peak_ | 9.58         | - |
| chr2 | 18862812 | 18862863 | CSAR_peak_ | 9.58         | - |
| chr2 | 18862879 | 18862924 | CSAR_peak_ | 6.21         | - |
| chr2 | 18862946 | 18863090 | CSAR_peak_ | 36.59,39.92  | - |
| chr2 | 18863115 | 18863240 | CSAR_peak_ | 24.91,17.35  | - |
| chr2 | 18863271 | 18863889 | CSAR_peak_ | 7.46,10.25,5 | - |
| chr2 | 18864006 | 18864376 | CSAR_peak_ | 36.8,18.49,9 | - |
| chr2 | 18864409 | 18864502 | CSAR_peak_ | 78.92,56.32  | - |
| chr2 | 18864504 | 18864632 | CSAR_peak_ | 28.73,18.9   | - |
| chr2 | 18871857 | 18871950 | CSAR_peak_ | 13.51,14.88  | - |
| chr2 | 18872065 | 18872120 | CSAR_peak_ | 9.58         | - |
| chr2 | 18872662 | 18872704 | CSAR_peak_ | 7.27         | - |
| chr2 | 18873007 | 18873074 | CSAR_peak_ | 12.13,8.39   | - |
| chr2 | 18905953 | 18905994 | CSAR_peak_ | 7.58         | - |
| chr2 | 18906141 | 18906211 | CSAR_peak_ | 9.58         | - |
| chr2 | 18917255 | 18917297 | CSAR_peak_ | 6.21         | - |
| chr2 | 18917582 | 18917622 | CSAR_peak_ | 7.27         | - |
| chr2 | 18917720 | 18917785 | CSAR_peak_ | 14.88        | - |
| chr2 | 18917904 | 18917916 | CSAR_peak_ | 10.83        | - |
| chr2 | 18918118 | 18918180 | CSAR_peak_ | 7.27         | - |
| chr2 | 18918183 | 18918254 | CSAR_peak_ | 7.27         | - |
| chr2 | 18918262 | 18918362 | CSAR_peak_ | 12.35,10.02  | - |
| chr2 | 18932269 | 18932302 | CSAR_peak_ | 7.27         | - |
| chr2 | 18932457 | 18932517 | CSAR_peak_ | 9.58,5.86    | - |
| chr2 | 18968932 | 18968987 | CSAR_peak_ | 14.88        | - |
| chr2 | 18969312 | 18969326 | CSAR_peak_ | 10.83        | - |
| chr2 | 18969453 | 18969500 | CSAR_peak_ | 7.27,8.28    | - |
| chr2 | 18971127 | 18971198 | CSAR_peak_ | 7.27         | - |
| chr2 | 18985118 | 18985187 | CSAR_peak_ | 7.27,10.83   | - |
| chr2 | 18985266 | 18985309 | CSAR_peak_ | 7.27         | - |
| chr2 | 19004443 | 19004479 | CSAR_peak_ | 7.27         | - |
| chr2 | 19004846 | 19004887 | CSAR_peak_ | 9.58         | - |
| chr2 | 19005210 | 19005256 | CSAR_peak_ | 6.21         | - |
| chr2 | 19018795 | 19018898 | CSAR_peak_ | 9.58,5.86    | - |
| chr2 | 19019064 | 19019136 | CSAR_peak_ | 12.13        | - |
| chr2 | 19022257 | 19022314 | CSAR_peak_ | 17.82,17.82  | - |
| chr2 | 19022610 | 19022698 | CSAR_peak_ | 13.48        | - |
| chr2 | 19022924 | 19022996 | CSAR_peak_ | 25.18,21.56  | - |
| chr2 | 19023071 | 19023096 | CSAR_peak_ | 14.88,17.37  | - |

|      |          |          |            |                |
|------|----------|----------|------------|----------------|
| chr2 | 19023547 | 19023600 | CSAR_peak_ | 12.31,8.2,7.9- |
| chr2 | 19023631 | 19023718 | CSAR_peak_ | 13.47 -        |
| chr2 | 19023896 | 19023977 | CSAR_peak_ | 12.5,9.58,7.2- |
| chr2 | 19024135 | 19024189 | CSAR_peak_ | 14.88 -        |
| chr2 | 19024226 | 19024343 | CSAR_peak_ | 12.13,7.27 -   |
| chr2 | 19024512 | 19024553 | CSAR_peak_ | 9.58 -         |
| chr2 | 19024635 | 19024705 | CSAR_peak_ | 14.88 -        |
| chr2 | 19025747 | 19025832 | CSAR_peak_ | 12.13,10.31 -  |
| chr2 | 19026172 | 19026239 | CSAR_peak_ | 8.39,6.03 -    |
| chr2 | 19026280 | 19026327 | CSAR_peak_ | 7.27 -         |
| chr2 | 19026575 | 19026696 | CSAR_peak_ | 10.83 -        |
| chr2 | 19026748 | 19026855 | CSAR_peak_ | 13.51,7.58 -   |
| chr2 | 19027162 | 19027220 | CSAR_peak_ | 7.29,17.82 -   |
| chr2 | 19086864 | 19086920 | CSAR_peak_ | 8.39,7.58 -    |
| chr2 | 19086938 | 19086986 | CSAR_peak_ | 6.21 -         |
| chr2 | 19087012 | 19087053 | CSAR_peak_ | 7.27 -         |
| chr2 | 19087559 | 19087600 | CSAR_peak_ | 7.27 -         |
| chr2 | 19087873 | 19087914 | CSAR_peak_ | 6.21 -         |
| chr2 | 19091912 | 19091984 | CSAR_peak_ | 9.77 -         |
| chr2 | 19109762 | 19109814 | CSAR_peak_ | 8.65,5.86 -    |
| chr2 | 19110176 | 19110224 | CSAR_peak_ | 7.27 -         |
| chr2 | 19111613 | 19111650 | CSAR_peak_ | 5.62 -         |
| chr2 | 19112110 | 19112189 | CSAR_peak_ | 16.33,12.31 -  |
| chr2 | 19112438 | 19112491 | CSAR_peak_ | 10.83,17.82 -  |
| chr2 | 19112543 | 19112661 | CSAR_peak_ | 20.43,22.56 -  |
| chr2 | 19112692 | 19112742 | CSAR_peak_ | 7.27 -         |
| chr2 | 19112994 | 19113044 | CSAR_peak_ | 7.27 -         |
| chr2 | 19113074 | 19113159 | CSAR_peak_ | 7.29,16.34 -   |
| chr2 | 19113439 | 19113493 | CSAR_peak_ | 7.27 -         |
| chr2 | 19114001 | 19114043 | CSAR_peak_ | 7.27 -         |
| chr2 | 19115892 | 19115955 | CSAR_peak_ | 8.39 -         |
| chr2 | 19116489 | 19116544 | CSAR_peak_ | 11.66 -        |
| chr2 | 19116753 | 19116809 | CSAR_peak_ | 10.83 -        |
| chr2 | 19117171 | 19117237 | CSAR_peak_ | 11.14,12.13 -  |
| chr2 | 19118189 | 19118262 | CSAR_peak_ | 8.65 -         |
| chr2 | 19118560 | 19118613 | CSAR_peak_ | 10.83 -        |
| chr2 | 19120277 | 19120330 | CSAR_peak_ | 7.27 -         |
| chr2 | 19121062 | 19121126 | CSAR_peak_ | 14.88,25.18 -  |
| chr2 | 19121295 | 19121361 | CSAR_peak_ | 24.21,12.13 -  |
| chr2 | 19121869 | 19121913 | CSAR_peak_ | 8.65 -         |
| chr2 | 19124470 | 19124532 | CSAR_peak_ | 18.95,6.57 -   |
| chr2 | 19125047 | 19125113 | CSAR_peak_ | 7.92,8.65 -    |

|      |          |          |            |             |   |
|------|----------|----------|------------|-------------|---|
| chr2 | 19125118 | 19125170 | CSAR_peak_ | 6.21        | - |
| chr2 | 19125353 | 19125407 | CSAR_peak_ | 9.58,7.27   | - |
| chr2 | 19126872 | 19126936 | CSAR_peak_ | 9.58        | - |
| chr2 | 19130292 | 19130334 | CSAR_peak_ | 7.27        | - |
| chr2 | 19130494 | 19130538 | CSAR_peak_ | 7.92        | - |
| chr2 | 19137615 | 19137633 | CSAR_peak_ | 6.21        | - |
| chr2 | 19138318 | 19138396 | CSAR_peak_ | 7.27        | - |
| chr2 | 19139080 | 19139144 | CSAR_peak_ | 12.13       | - |
| chr2 | 19164619 | 19164739 | CSAR_peak_ | 12.17,8.39  | - |
| chr2 | 19164779 | 19164863 | CSAR_peak_ | 8.14,7.27   | - |
| chr2 | 19164877 | 19164990 | CSAR_peak_ | 9.58,8.39   | - |
| chr2 | 19166043 | 19166090 | CSAR_peak_ | 8.39        | - |
| chr2 | 19183188 | 19183235 | CSAR_peak_ | 9.77        | - |
| chr2 | 19184971 | 19185017 | CSAR_peak_ | 7.27        | - |
| chr2 | 19208672 | 19208773 | CSAR_peak_ | 10.94,16.33 | - |
| chr2 | 19209100 | 19209136 | CSAR_peak_ | 9.58        | - |
| chr2 | 19210037 | 19210116 | CSAR_peak_ | 8.52,6.64   | - |
| chr2 | 19210632 | 19210673 | CSAR_peak_ | 7.27        | - |
| chr2 | 19272439 | 19272492 | CSAR_peak_ | 6.21        | - |
| chr2 | 19274243 | 19274251 | CSAR_peak_ | 6.21        | - |
| chr2 | 19274783 | 19274871 | CSAR_peak_ | 10.83       | - |
| chr2 | 19274954 | 19275021 | CSAR_peak_ | 6.03        | - |
| chr2 | 19275594 | 19275637 | CSAR_peak_ | 12.13,8.39  | - |
| chr2 | 19279244 | 19279312 | CSAR_peak_ | 7.27        | - |
| chr2 | 19310292 | 19310362 | CSAR_peak_ | 6.85        | - |
| chr2 | 19310525 | 19310632 | CSAR_peak_ | 6.57        | - |
| chr2 | 19310717 | 19310751 | CSAR_peak_ | 6.21,7.27   | - |
| chr2 | 19310921 | 19311002 | CSAR_peak_ | 19.36,8.28  | - |
| chr2 | 19312339 | 19312404 | CSAR_peak_ | 13.48       | - |
| chr2 | 19312430 | 19312449 | CSAR_peak_ | 9.77        | - |
| chr2 | 19312512 | 19312589 | CSAR_peak_ | 29.14,22.52 | - |
| chr2 | 19312710 | 19312801 | CSAR_peak_ | 9.58,13.44  | - |
| chr2 | 19312833 | 19312891 | CSAR_peak_ | 8.39        | - |
| chr2 | 19313008 | 19313101 | CSAR_peak_ | 14.88,9.58  | - |
| chr2 | 19333179 | 19333226 | CSAR_peak_ | 6.03        | - |
| chr2 | 19333341 | 19333438 | CSAR_peak_ | 12.13,14.88 | - |
| chr2 | 19333523 | 19333584 | CSAR_peak_ | 6.21,8.39   | - |
| chr2 | 19333597 | 19333656 | CSAR_peak_ | 6.21        | - |
| chr2 | 19333964 | 19334011 | CSAR_peak_ | 8.39        | - |
| chr2 | 19334154 | 19334258 | CSAR_peak_ | 19.36,10.83 | - |
| chr2 | 19334336 | 19334425 | CSAR_peak_ | 7.27,7.27   | - |
| chr2 | 19334438 | 19334488 | CSAR_peak_ | 6.21        | - |

|      |          |          |            |               |   |
|------|----------|----------|------------|---------------|---|
| chr2 | 19360074 | 19360158 | CSAR_peak_ | 10.83         | - |
| chr2 | 19360685 | 19360734 | CSAR_peak_ | 10.83         | - |
| chr2 | 19369112 | 19369225 | CSAR_peak_ | 24.21,12.74   | - |
| chr2 | 19369367 | 19369454 | CSAR_peak_ | 22.58,17.37   | - |
| chr2 | 19369647 | 19369689 | CSAR_peak_ | 12.13         | - |
| chr2 | 19400697 | 19400773 | CSAR_peak_ | 6.21,8.39     | - |
| chr2 | 19402832 | 19402878 | CSAR_peak_ | 6.21          | - |
| chr2 | 19442857 | 19442915 | CSAR_peak_ | 14.88         | - |
| chr2 | 19443838 | 19443889 | CSAR_peak_ | 17.82         | - |
| chr2 | 19444240 | 19444353 | CSAR_peak_ | 12.13,9.58    | - |
| chr2 | 19444656 | 19444777 | CSAR_peak_ | 10.83,6.57    | - |
| chr2 | 19444871 | 19444937 | CSAR_peak_ | 9.58          | - |
| chr2 | 19444954 | 19444993 | CSAR_peak_ | 6.81          | - |
| chr2 | 19539874 | 19539955 | CSAR_peak_ | 10.83,5.86,1! | - |
| chr2 | 19540033 | 19540151 | CSAR_peak_ | 12.74,6.03,1! | - |
| chr2 | 19552767 | 19552871 | CSAR_peak_ | 12.13         | - |
| chr2 | 19553076 | 19553211 | CSAR_peak_ | 6.95,13.84    | - |
| chr2 | 19553438 | 19553481 | CSAR_peak_ | 9.58,9.58     | - |
| chr2 | 19553617 | 19553668 | CSAR_peak_ | 12.13         | - |
| chr2 | 19587654 | 19587722 | CSAR_peak_ | 9.58          | - |
| chr2 | 19591066 | 19591101 | CSAR_peak_ | 7.27          | - |
| chr2 | 19591124 | 19591194 | CSAR_peak_ | 7.27,10.83    | - |
| chr2 | 19591461 | 19591573 | CSAR_peak_ | 24.52,10.83   | - |
| chr2 | 19591644 | 19591680 | CSAR_peak_ | 6.21          | - |
| chr2 | 19592143 | 19592173 | CSAR_peak_ | 21.94         | - |
| chr2 | 19592316 | 19592437 | CSAR_peak_ | 30.02,8.61    | - |
| chr2 | 19593064 | 19593107 | CSAR_peak_ | 6.21          | - |
| chr2 | 19616372 | 19616428 | CSAR_peak_ | 8.39          | - |
| chr2 | 19616782 | 19616891 | CSAR_peak_ | 9.58,13.48    | - |
| chr2 | 19618149 | 19618208 | CSAR_peak_ | 8.39          | - |
| chr2 | 19618667 | 19618729 | CSAR_peak_ | 6.95,20.43    | - |
| chr2 | 19618827 | 19618899 | CSAR_peak_ | 13.48,8.09    | - |
| chr2 | 19619184 | 19619194 | CSAR_peak_ | 7.27,7.27     | - |
| chr2 | 19619280 | 19619355 | CSAR_peak_ | 8.65,10.95    | - |
| chr2 | 19619455 | 19619544 | CSAR_peak_ | 16.33,13.48   | - |
| chr2 | 19619657 | 19619688 | CSAR_peak_ | 6.21          | - |
| chr2 | 19619836 | 19619916 | CSAR_peak_ | 11.38         | - |
| chr2 | 19620024 | 19620104 | CSAR_peak_ | 10.94,10.82   | - |
| chr2 | 19620447 | 19620524 | CSAR_peak_ | 5.86,10.95    | - |
| chr2 | 19620642 | 19620695 | CSAR_peak_ | 9.58,7.27     | - |
| chr2 | 19620935 | 19621004 | CSAR_peak_ | 25.07,7.68    | - |
| chr2 | 19621359 | 19621420 | CSAR_peak_ | 7.26,10.02    | - |



|      |          |          |            |               |   |
|------|----------|----------|------------|---------------|---|
| chr2 | 19621660 | 19621707 | CSAR_peak_ | 9.58          | - |
| chr2 | 19621772 | 19621814 | CSAR_peak_ | 12.13,9.58    | - |
| chr2 | 19621856 | 19621898 | CSAR_peak_ | 7.92,8.39     | - |
| chr2 | 19621982 | 19622026 | CSAR_peak_ | 7.27,7.27     | - |
| chr2 | 19622050 | 19622097 | CSAR_peak_ | 9.58          | - |
| chr2 | 19646841 | 19646898 | CSAR_peak_ | 6.21          | - |
| chr2 | 19648204 | 19648283 | CSAR_peak_ | 13.51         | - |
| chr2 | 19648449 | 19648496 | CSAR_peak_ | 5.86          | - |
| chr2 | 19649297 | 19649331 | CSAR_peak_ | 6.21          | - |
| chr2 | 19651681 | 19651705 | CSAR_peak_ | 7.27          | - |
| chr2 | 19653242 | 19653323 | CSAR_peak_ | 9.58          | - |
| chr2 | 19655109 | 19655158 | CSAR_peak_ | 8.39          | - |
| chr2 | 19655456 | 19655525 | CSAR_peak_ | 7.27          | - |
| chr2 | 19656194 | 19656234 | CSAR_peak_ | 9.58,7.27     | - |
| chr2 | 19656695 | 19656842 | CSAR_peak_ | 7.36,6.94     | - |
| chr2 | 19657007 | 19657147 | CSAR_peak_ | 7.27          | - |
| chr2 | 19657485 | 19657534 | CSAR_peak_ | 7.27          | - |
| chr2 | 19657670 | 19657724 | CSAR_peak_ | 10.83,7.27    | - |
| chr2 | 19659280 | 19659406 | CSAR_peak_ | 7.27,9.58,7.5 | - |
| chr2 | 19659899 | 19659952 | CSAR_peak_ | 12.13         | - |
| chr2 | 19661277 | 19661349 | CSAR_peak_ | 9.58          | - |
| chr2 | 19662389 | 19662437 | CSAR_peak_ | 6.21          | - |
| chr2 | 19688239 | 19688295 | CSAR_peak_ | 7.27,12.13    | - |
| chr2 | 19688897 | 19688959 | CSAR_peak_ | 9.58          | - |
| chr2 | 19689771 | 19689833 | CSAR_peak_ | 31.73,9.77    | - |
| chr2 | 19691416 | 19691480 | CSAR_peak_ | 7.92          | - |
| chr2 | 19691553 | 19691601 | CSAR_peak_ | 6.21          | - |
| chr2 | 19691667 | 19691710 | CSAR_peak_ | 8.39,6.21     | - |
| chr2 | 19691960 | 19691977 | CSAR_peak_ | 9.77          | - |
| chr2 | 19692447 | 19692494 | CSAR_peak_ | 12.17,14.76,1 | - |
| chr2 | 19692673 | 19692715 | CSAR_peak_ | 6.21          | - |
| chr2 | 19693351 | 19693416 | CSAR_peak_ | 19.36         | - |
| chr2 | 19693485 | 19693588 | CSAR_peak_ | 6.21          | - |
| chr2 | 19694004 | 19694043 | CSAR_peak_ | 6.21          | - |
| chr2 | 19694321 | 19694367 | CSAR_peak_ | 7.27          | - |
| chr2 | 19694612 | 19694686 | CSAR_peak_ | 14.88         | - |
| chr2 | 19695101 | 19695152 | CSAR_peak_ | 9.58          | - |
| chr3 | 11527    | 11590    | CSAR_peak_ | 6.21          | + |
| chr3 | 86824    | 86871    | CSAR_peak_ | 8.28          | + |
| chr3 | 111482   | 111547   | CSAR_peak_ | 7.92          | + |
| chr3 | 111986   | 112028   | CSAR_peak_ | 7.27          | + |
| chr3 | 112605   | 112640   | CSAR_peak_ | 6.03          | + |

|      |        |        |            |                  |   |
|------|--------|--------|------------|------------------|---|
| chr3 | 188933 | 188992 | CSAR_peak_ | 6.85,11.96       | + |
| chr3 | 189261 | 189294 | CSAR_peak_ | 6.21             | + |
| chr3 | 189701 | 189772 | CSAR_peak_ | 5.62,7.73        | + |
| chr3 | 189843 | 189860 | CSAR_peak_ | 6.21             | + |
| chr3 | 189910 | 189977 | CSAR_peak_ | 12.5             | + |
| chr3 | 190049 | 190071 | CSAR_peak_ | 12.13            | + |
| chr3 | 190267 | 190357 | CSAR_peak_ | 9.58,10.57,11.13 | + |
| chr3 | 191094 | 191139 | CSAR_peak_ | 8.39             | + |
| chr3 | 227115 | 227154 | CSAR_peak_ | 9.58             | + |
| chr3 | 227993 | 228029 | CSAR_peak_ | 6.95             | + |
| chr3 | 228129 | 228171 | CSAR_peak_ | 7.27             | + |
| chr3 | 256872 | 256906 | CSAR_peak_ | 7.27             | + |
| chr3 | 257248 | 257308 | CSAR_peak_ | 13.44,8.13       | + |
| chr3 | 257965 | 258078 | CSAR_peak_ | 13               | + |
| chr3 | 258111 | 258185 | CSAR_peak_ | 18.9             | + |
| chr3 | 283011 | 283062 | CSAR_peak_ | 6.44             | + |
| chr3 | 286867 | 286920 | CSAR_peak_ | 6.21             | + |
| chr3 | 296284 | 296309 | CSAR_peak_ | 6.21             | + |
| chr3 | 352913 | 352950 | CSAR_peak_ | 8.39             | + |
| chr3 | 353828 | 353878 | CSAR_peak_ | 8.95             | + |
| chr3 | 361015 | 361074 | CSAR_peak_ | 5.62             | + |
| chr3 | 361333 | 361402 | CSAR_peak_ | 8.39             | + |
| chr3 | 361499 | 361509 | CSAR_peak_ | 6.21             | + |
| chr3 | 361853 | 361907 | CSAR_peak_ | 6.1              | + |
| chr3 | 362024 | 362065 | CSAR_peak_ | 7.27             | + |
| chr3 | 362275 | 362336 | CSAR_peak_ | 8.39             | + |
| chr3 | 363244 | 363364 | CSAR_peak_ | 21.56,38.71      | + |
| chr3 | 363857 | 363913 | CSAR_peak_ | 6.21,8.39        | + |
| chr3 | 364273 | 364327 | CSAR_peak_ | 6.21             | + |
| chr3 | 364535 | 364585 | CSAR_peak_ | 9.58             | + |
| chr3 | 367504 | 367531 | CSAR_peak_ | 7.27             | + |
| chr3 | 367559 | 367611 | CSAR_peak_ | 6.02             | + |
| chr3 | 381074 | 381111 | CSAR_peak_ | 6.57             | + |
| chr3 | 384003 | 384058 | CSAR_peak_ | 6.95             | + |
| chr3 | 391490 | 391591 | CSAR_peak_ | 9.77,6.95,16.13  | + |
| chr3 | 408674 | 408722 | CSAR_peak_ | 7.27             | + |
| chr3 | 461741 | 461792 | CSAR_peak_ | 9.61             | + |
| chr3 | 462125 | 462164 | CSAR_peak_ | 7.27             | + |
| chr3 | 462191 | 462234 | CSAR_peak_ | 9.58             | + |
| chr3 | 463418 | 463464 | CSAR_peak_ | 8.12,9.58        | + |
| chr3 | 463704 | 463770 | CSAR_peak_ | 16.11,6.95       | + |
| chr3 | 480734 | 480794 | CSAR_peak_ | 11.14,9.58       | + |

|      |        |        |            |                |   |
|------|--------|--------|------------|----------------|---|
| chr3 | 480903 | 480918 | CSAR_peak_ | 11.14          | + |
| chr3 | 480952 | 481010 | CSAR_peak_ | 9.58           | + |
| chr3 | 481017 | 481059 | CSAR_peak_ | 6.21           | + |
| chr3 | 483068 | 483123 | CSAR_peak_ | 8.65           | + |
| chr3 | 483442 | 483492 | CSAR_peak_ | 10.83          | + |
| chr3 | 483686 | 483764 | CSAR_peak_ | 7.92           | + |
| chr3 | 484726 | 484837 | CSAR_peak_ | 12.17,6.03     | + |
| chr3 | 484958 | 485025 | CSAR_peak_ | 10.02          | + |
| chr3 | 485633 | 485663 | CSAR_peak_ | 7.27           | + |
| chr3 | 486982 | 487043 | CSAR_peak_ | 8.39,12.17     | + |
| chr3 | 488283 | 488358 | CSAR_peak_ | 7.27           | + |
| chr3 | 488421 | 488517 | CSAR_peak_ | 7.92,10.02,7.  | + |
| chr3 | 506024 | 506102 | CSAR_peak_ | 6.57,7.27      | + |
| chr3 | 506122 | 506160 | CSAR_peak_ | 9.58           | + |
| chr3 | 506300 | 506342 | CSAR_peak_ | 7.27           | + |
| chr3 | 506494 | 506534 | CSAR_peak_ | 5.62           | + |
| chr3 | 507552 | 507595 | CSAR_peak_ | 6.21           | + |
| chr3 | 508907 | 508961 | CSAR_peak_ | 6.21           | + |
| chr3 | 509170 | 509211 | CSAR_peak_ | 7.29           | + |
| chr3 | 509217 | 509304 | CSAR_peak_ | 8.39,21.56,14. | + |
| chr3 | 509357 | 509416 | CSAR_peak_ | 11.14,8.9      | + |
| chr3 | 509476 | 509523 | CSAR_peak_ | 7.27           | + |
| chr3 | 509716 | 509760 | CSAR_peak_ | 8.39           | + |
| chr3 | 509771 | 509845 | CSAR_peak_ | 13.51,7.4      | + |
| chr3 | 509849 | 509891 | CSAR_peak_ | 8.12,14.76     | + |
| chr3 | 509895 | 509952 | CSAR_peak_ | 8.84           | + |
| chr3 | 509988 | 510101 | CSAR_peak_ | 8.95,8.39,6.9  | + |
| chr3 | 510199 | 510275 | CSAR_peak_ | 8.13,13.66     | + |
| chr3 | 510836 | 510872 | CSAR_peak_ | 6.21           | + |
| chr3 | 542867 | 542904 | CSAR_peak_ | 7.27           | + |
| chr3 | 614558 | 614605 | CSAR_peak_ | 8.95           | + |
| chr3 | 616504 | 616637 | CSAR_peak_ | 54.39,6.75,54. | + |
| chr3 | 616764 | 616898 | CSAR_peak_ | 35.2,50.08     | + |
| chr3 | 618644 | 618696 | CSAR_peak_ | 9.58           | + |
| chr3 | 619381 | 619460 | CSAR_peak_ | 13.48          | + |
| chr3 | 635818 | 635923 | CSAR_peak_ | 12.13          | + |
| chr3 | 636716 | 636739 | CSAR_peak_ | 6.21           | + |
| chr3 | 683774 | 683856 | CSAR_peak_ | 7.27           | + |
| chr3 | 684683 | 684722 | CSAR_peak_ | 8.39           | + |
| chr3 | 685725 | 685854 | CSAR_peak_ | 13.66,6.95,6.  | + |
| chr3 | 687746 | 687808 | CSAR_peak_ | 12.17          | + |
| chr3 | 688250 | 688305 | CSAR_peak_ | 6.57           | + |

|      |         |         |            |                |   |
|------|---------|---------|------------|----------------|---|
| chr3 | 688342  | 688446  | CSAR_peak_ | 6.21           | + |
| chr3 | 688535  | 688678  | CSAR_peak_ | 13.48,8.09,6.  | + |
| chr3 | 689467  | 689503  | CSAR_peak_ | 8.39           | + |
| chr3 | 718429  | 718474  | CSAR_peak_ | 9.58           | + |
| chr3 | 724321  | 724371  | CSAR_peak_ | 6.03           | + |
| chr3 | 787246  | 787271  | CSAR_peak_ | 6.57           | + |
| chr3 | 787724  | 787775  | CSAR_peak_ | 14.85,9.58,1(+ |   |
| chr3 | 787861  | 787878  | CSAR_peak_ | 10.31          | + |
| chr3 | 787952  | 788009  | CSAR_peak_ | 12.27          | + |
| chr3 | 788307  | 788351  | CSAR_peak_ | 6.03           | + |
| chr3 | 789178  | 789224  | CSAR_peak_ | 6.95,11.38,7.  | + |
| chr3 | 789300  | 789329  | CSAR_peak_ | 7.58,7.27,10.  | + |
| chr3 | 789412  | 789438  | CSAR_peak_ | 17.82,8.09     | + |
| chr3 | 789614  | 789650  | CSAR_peak_ | 6.87           | + |
| chr3 | 801539  | 801605  | CSAR_peak_ | 5.62           | + |
| chr3 | 805155  | 805211  | CSAR_peak_ | 8.39           | + |
| chr3 | 808199  | 808236  | CSAR_peak_ | 8.39           | + |
| chr3 | 921827  | 921880  | CSAR_peak_ | 6.85           | + |
| chr3 | 922410  | 922448  | CSAR_peak_ | 6.21           | + |
| chr3 | 923948  | 923994  | CSAR_peak_ | 8.39           | + |
| chr3 | 924329  | 924366  | CSAR_peak_ | 7.27           | + |
| chr3 | 997863  | 997905  | CSAR_peak_ | 7.27           | + |
| chr3 | 1026523 | 1026563 | CSAR_peak_ | 6.03           | + |
| chr3 | 1034041 | 1034082 | CSAR_peak_ | 8.65           | + |
| chr3 | 1034423 | 1034460 | CSAR_peak_ | 9.58           | + |
| chr3 | 1081158 | 1081209 | CSAR_peak_ | 9.58           | + |
| chr3 | 1081759 | 1081835 | CSAR_peak_ | 7.27,9.79      | + |
| chr3 | 1081839 | 1081885 | CSAR_peak_ | 7.68           | + |
| chr3 | 1081987 | 1082069 | CSAR_peak_ | 6.72           | + |
| chr3 | 1082189 | 1082236 | CSAR_peak_ | 7.58           | + |
| chr3 | 1082661 | 1082703 | CSAR_peak_ | 7.58           | + |
| chr3 | 1082811 | 1082826 | CSAR_peak_ | 7.73           | + |
| chr3 | 1083029 | 1083099 | CSAR_peak_ | 10.83          | + |
| chr3 | 1085588 | 1085647 | CSAR_peak_ | 9.58           | + |
| chr3 | 1203694 | 1203757 | CSAR_peak_ | 9.58           | + |
| chr3 | 1205459 | 1205505 | CSAR_peak_ | 8.39           | + |
| chr3 | 1209525 | 1209561 | CSAR_peak_ | 8.39           | + |
| chr3 | 1300336 | 1300384 | CSAR_peak_ | 7.92           | + |
| chr3 | 1345204 | 1345288 | CSAR_peak_ | 8.39           | + |
| chr3 | 1355118 | 1355159 | CSAR_peak_ | 7.27           | + |
| chr3 | 1355240 | 1355278 | CSAR_peak_ | 10.83          | + |
| chr3 | 1355705 | 1355776 | CSAR_peak_ | 12.27,12.31    | + |

|      |         |         |            |               |   |
|------|---------|---------|------------|---------------|---|
| chr3 | 1355859 | 1355956 | CSAR_peak_ | 38.71,14.08   | + |
| chr3 | 1356012 | 1356050 | CSAR_peak_ | 10.83,9.58    | + |
| chr3 | 1356309 | 1356374 | CSAR_peak_ | 8.95,8.65     | + |
| chr3 | 1356415 | 1356500 | CSAR_peak_ | 8.39,13.48    | + |
| chr3 | 1356574 | 1356612 | CSAR_peak_ | 6.21          | + |
| chr3 | 1356978 | 1357094 | CSAR_peak_ | 7.34,6.95,18. | + |
| chr3 | 1357222 | 1357296 | CSAR_peak_ | 8.12          | + |
| chr3 | 1357335 | 1357394 | CSAR_peak_ | 8.39          | + |
| chr3 | 1357540 | 1357573 | CSAR_peak_ | 6.21          | + |
| chr3 | 1363104 | 1363199 | CSAR_peak_ | 7.27          | + |
| chr3 | 1364343 | 1364394 | CSAR_peak_ | 6.21,7.34     | + |
| chr3 | 1365682 | 1365723 | CSAR_peak_ | 7.31,12.74    | + |
| chr3 | 1365831 | 1365941 | CSAR_peak_ | 10.31,8.95    | + |
| chr3 | 1366058 | 1366134 | CSAR_peak_ | 9.77          | + |
| chr3 | 1366147 | 1366203 | CSAR_peak_ | 5.62,6.03     | + |
| chr3 | 1366334 | 1366466 | CSAR_peak_ | 7.27,6.02,6.0 | + |
| chr3 | 1366549 | 1366578 | CSAR_peak_ | 8.65          | + |
| chr3 | 1366642 | 1366687 | CSAR_peak_ | 6.95,7.58     | + |
| chr3 | 1366749 | 1366804 | CSAR_peak_ | 6.84,11.83    | + |
| chr3 | 1366874 | 1366965 | CSAR_peak_ | 7.92,7.73     | + |
| chr3 | 1367011 | 1367058 | CSAR_peak_ | 6.21          | + |
| chr3 | 1367278 | 1367311 | CSAR_peak_ | 6.21          | + |
| chr3 | 1367720 | 1367819 | CSAR_peak_ | 6.21          | + |
| chr3 | 1431825 | 1431943 | CSAR_peak_ | 8.65          | + |
| chr3 | 1431945 | 1432023 | CSAR_peak_ | 7.27          | + |
| chr3 | 1432087 | 1432177 | CSAR_peak_ | 8.13          | + |
| chr3 | 1477737 | 1477800 | CSAR_peak_ | 13.51,6.21    | + |
| chr3 | 1478004 | 1478048 | CSAR_peak_ | 7.27          | + |
| chr3 | 1481387 | 1481395 | CSAR_peak_ | 6.21          | + |
| chr3 | 1481546 | 1481691 | CSAR_peak_ | 6.21,10.02    | + |
| chr3 | 1488790 | 1488838 | CSAR_peak_ | 6.21,6.21     | + |
| chr3 | 1489476 | 1489522 | CSAR_peak_ | 5.62          | + |
| chr3 | 1489544 | 1489698 | CSAR_peak_ | 7.27,10.95    | + |
| chr3 | 1489766 | 1489832 | CSAR_peak_ | 12.72,11.75   | + |
| chr3 | 1489880 | 1490081 | CSAR_peak_ | 7.34,7.34,9.5 | + |
| chr3 | 1490263 | 1490322 | CSAR_peak_ | 8.95          | + |
| chr3 | 1490450 | 1490617 | CSAR_peak_ | 23.49,9.41    | + |
| chr3 | 1543032 | 1543104 | CSAR_peak_ | 8.39          | + |
| chr3 | 1545069 | 1545128 | CSAR_peak_ | 6.21,7.92     | + |
| chr3 | 1562569 | 1562640 | CSAR_peak_ | 6.21,8.65,6.4 | + |
| chr3 | 1566334 | 1566384 | CSAR_peak_ | 10.02,8.39    | + |
| chr3 | 1591330 | 1591387 | CSAR_peak_ | 7.27          | + |

|      |         |         |            |                |   |
|------|---------|---------|------------|----------------|---|
| chr3 | 1593513 | 1593588 | CSAR_peak_ | 14.88,9.03     | + |
| chr3 | 1593829 | 1593858 | CSAR_peak_ | 8.39           | + |
| chr3 | 1593968 | 1594080 | CSAR_peak_ | 9.41,6.85,6.5  | + |
| chr3 | 1594252 | 1594351 | CSAR_peak_ | 8.28           | + |
| chr3 | 1594470 | 1594548 | CSAR_peak_ | 8.39           | + |
| chr3 | 1596527 | 1596577 | CSAR_peak_ | 7.27           | + |
| chr3 | 1596820 | 1596872 | CSAR_peak_ | 9.77           | + |
| chr3 | 1597047 | 1597082 | CSAR_peak_ | 22.56          | + |
| chr3 | 1597549 | 1597587 | CSAR_peak_ | 17.82          | + |
| chr3 | 1598037 | 1598074 | CSAR_peak_ | 6.21           | + |
| chr3 | 1604491 | 1604513 | CSAR_peak_ | 6.21           | + |
| chr3 | 1604546 | 1604633 | CSAR_peak_ | 7.26,6.95      | + |
| chr3 | 1605025 | 1605072 | CSAR_peak_ | 6.95           | + |
| chr3 | 1605159 | 1605201 | CSAR_peak_ | 7.58           | + |
| chr3 | 1610313 | 1610371 | CSAR_peak_ | 9.77           | + |
| chr3 | 1611762 | 1611809 | CSAR_peak_ | 12.13          | + |
| chr3 | 1614766 | 1614810 | CSAR_peak_ | 6.44           | + |
| chr3 | 1622346 | 1622399 | CSAR_peak_ | 6.21           | + |
| chr3 | 1653980 | 1654017 | CSAR_peak_ | 6.21           | + |
| chr3 | 1654202 | 1654284 | CSAR_peak_ | 10.83          | + |
| chr3 | 1654453 | 1654590 | CSAR_peak_ | 7.27,12.31,9.  | + |
| chr3 | 1655289 | 1655343 | CSAR_peak_ | 9.58,7.27      | + |
| chr3 | 1657782 | 1657795 | CSAR_peak_ | 8.92           | + |
| chr3 | 1657831 | 1657904 | CSAR_peak_ | 199.84,6.53,:  | + |
| chr3 | 1681831 | 1681844 | CSAR_peak_ | 8.92           | + |
| chr3 | 1681880 | 1681953 | CSAR_peak_ | 199.84,6.53,:  | + |
| chr3 | 1686506 | 1686544 | CSAR_peak_ | 6.57           | + |
| chr3 | 1709260 | 1709268 | CSAR_peak_ | 6.21           | + |
| chr3 | 1740850 | 1740907 | CSAR_peak_ | 10.47,13.64,(+ | + |
| chr3 | 1741163 | 1741192 | CSAR_peak_ | 8.39           | + |
| chr3 | 1741762 | 1741800 | CSAR_peak_ | 9.58           | + |
| chr3 | 1843768 | 1843818 | CSAR_peak_ | 6.21           | + |
| chr3 | 1937555 | 1937605 | CSAR_peak_ | 6.03           | + |
| chr3 | 1937815 | 1937901 | CSAR_peak_ | 7.27           | + |
| chr3 | 1938011 | 1938102 | CSAR_peak_ | 12.13,6.21     | + |
| chr3 | 1939220 | 1939326 | CSAR_peak_ | 10.83,9.58     | + |
| chr3 | 1941231 | 1941264 | CSAR_peak_ | 8.65,8.65      | + |
| chr3 | 1941471 | 1941484 | CSAR_peak_ | 7.34           | + |
| chr3 | 1941526 | 1941599 | CSAR_peak_ | 7.68,6.95      | + |
| chr3 | 1942289 | 1942330 | CSAR_peak_ | 6.21           | + |
| chr3 | 1943893 | 1943922 | CSAR_peak_ | 6.21           | + |
| chr3 | 1944158 | 1944238 | CSAR_peak_ | 7.27           | + |

|      |         |         |            |               |   |
|------|---------|---------|------------|---------------|---|
| chr3 | 1944380 | 1944432 | CSAR_peak_ | 7.92          | + |
| chr3 | 1944554 | 1944588 | CSAR_peak_ | 6.03          | + |
| chr3 | 1945300 | 1945343 | CSAR_peak_ | 8.39          | + |
| chr3 | 1945849 | 1945909 | CSAR_peak_ | 6.95          | + |
| chr3 | 1946133 | 1946185 | CSAR_peak_ | 8.39          | + |
| chr3 | 1969250 | 1969294 | CSAR_peak_ | 6.03          | + |
| chr3 | 1970287 | 1970338 | CSAR_peak_ | 6.57          | + |
| chr3 | 2012239 | 2012372 | CSAR_peak_ | 7.27,8.65,13. | + |
| chr3 | 2012418 | 2012483 | CSAR_peak_ | 8.13,13       | + |
| chr3 | 2012630 | 2012740 | CSAR_peak_ | 19.96,11.66   | + |
| chr3 | 2012751 | 2012887 | CSAR_peak_ | 10.36,30.54   | + |
| chr3 | 2012890 | 2013011 | CSAR_peak_ | 10.36,26.03   | + |
| chr3 | 2013034 | 2013051 | CSAR_peak_ | 6.21          | + |
| chr3 | 2013132 | 2013257 | CSAR_peak_ | 7.58,6.02,8.3 | + |
| chr3 | 2013288 | 2013359 | CSAR_peak_ | 14.88         | + |
| chr3 | 2013574 | 2013620 | CSAR_peak_ | 8.65,6.21     | + |
| chr3 | 2013691 | 2013870 | CSAR_peak_ | 18.35,27.06,  | + |
| chr3 | 2013892 | 2014018 | CSAR_peak_ | 16.09,11.7,1  | + |
| chr3 | 2014095 | 2014147 | CSAR_peak_ | 6.57,6.95     | + |
| chr3 | 2014159 | 2014483 | CSAR_peak_ | 9.58,12.61,5. | + |
| chr3 | 2014485 | 2014529 | CSAR_peak_ | 14.34         | + |
| chr3 | 2014549 | 2014764 | CSAR_peak_ | 31.19,12.13,  | + |
| chr3 | 2014817 | 2015059 | CSAR_peak_ | 23.95,46.53,  | + |
| chr3 | 2015087 | 2015137 | CSAR_peak_ | 6.95          | + |
| chr3 | 2015144 | 2015190 | CSAR_peak_ | 7.73,9.13     | + |
| chr3 | 2015320 | 2015356 | CSAR_peak_ | 6.37          | + |
| chr3 | 2015850 | 2015911 | CSAR_peak_ | 14.88         | + |
| chr3 | 2017593 | 2017640 | CSAR_peak_ | 7.92          | + |
| chr3 | 2088771 | 2088846 | CSAR_peak_ | 8.12,6.44     | + |
| chr3 | 2088962 | 2089008 | CSAR_peak_ | 8.65          | + |
| chr3 | 2089745 | 2089877 | CSAR_peak_ | 16.33         | + |
| chr3 | 2120534 | 2120602 | CSAR_peak_ | 8.39,6.57     | + |
| chr3 | 2122094 | 2122131 | CSAR_peak_ | 6.03          | + |
| chr3 | 2123339 | 2123425 | CSAR_peak_ | 9.58,9.61     | + |
| chr3 | 2123532 | 2123558 | CSAR_peak_ | 9.77          | + |
| chr3 | 2123648 | 2123684 | CSAR_peak_ | 8.65          | + |
| chr3 | 2125554 | 2125606 | CSAR_peak_ | 6.21          | + |
| chr3 | 2133199 | 2133281 | CSAR_peak_ | 10.83         | + |
| chr3 | 2144866 | 2144913 | CSAR_peak_ | 8.39          | + |
| chr3 | 2145616 | 2145671 | CSAR_peak_ | 9.77,9.27     | + |
| chr3 | 2146495 | 2146546 | CSAR_peak_ | 6.95          | + |
| chr3 | 2147442 | 2147489 | CSAR_peak_ | 13.51         | + |

|      |         |         |            |                |   |
|------|---------|---------|------------|----------------|---|
| chr3 | 2147870 | 2147940 | CSAR_peak_ | 6.44,8.52      | + |
| chr3 | 2148496 | 2148557 | CSAR_peak_ | 12.13,8.39     | + |
| chr3 | 2149561 | 2149628 | CSAR_peak_ | 8.39,19.36     | + |
| chr3 | 2149868 | 2149930 | CSAR_peak_ | 8.39           | + |
| chr3 | 2162603 | 2162623 | CSAR_peak_ | 6.57           | + |
| chr3 | 2165238 | 2165307 | CSAR_peak_ | 8.39,8.39      | + |
| chr3 | 2202034 | 2202091 | CSAR_peak_ | 7.27           | + |
| chr3 | 2202179 | 2202234 | CSAR_peak_ | 6.57,7.68      | + |
| chr3 | 2202304 | 2202385 | CSAR_peak_ | 8.39,6.21      | + |
| chr3 | 2202390 | 2202442 | CSAR_peak_ | 7.27           | + |
| chr3 | 2202678 | 2202731 | CSAR_peak_ | 7.27,8.65      | + |
| chr3 | 2202780 | 2202866 | CSAR_peak_ | 9.31,11.66,9.  | + |
| chr3 | 2204252 | 2204319 | CSAR_peak_ | 9.58           | + |
| chr3 | 2300114 | 2300148 | CSAR_peak_ | 6.21           | + |
| chr3 | 2347679 | 2347775 | CSAR_peak_ | 6.1            | + |
| chr3 | 2347810 | 2347888 | CSAR_peak_ | 12.13          | + |
| chr3 | 2348720 | 2348936 | CSAR_peak_ | 16.33,9.77,1.  | + |
| chr3 | 2354808 | 2354888 | CSAR_peak_ | 11.14,10.94    | + |
| chr3 | 2354936 | 2355044 | CSAR_peak_ | 10.95          | + |
| chr3 | 2355129 | 2355201 | CSAR_peak_ | 10.83,11.38,1. | + |
| chr3 | 2355207 | 2355308 | CSAR_peak_ | 8.39,7.73      | + |
| chr3 | 2355628 | 2355744 | CSAR_peak_ | 6.45           | + |
| chr3 | 2356378 | 2356414 | CSAR_peak_ | 6.57           | + |
| chr3 | 2356453 | 2356518 | CSAR_peak_ | 9.61           | + |
| chr3 | 2356574 | 2356607 | CSAR_peak_ | 9.72           | + |
| chr3 | 2356762 | 2356805 | CSAR_peak_ | 6.21           | + |
| chr3 | 2369253 | 2369333 | CSAR_peak_ | 7.34           | + |
| chr3 | 2371038 | 2371082 | CSAR_peak_ | 6.57           | + |
| chr3 | 2414614 | 2414628 | CSAR_peak_ | 6.57           | + |
| chr3 | 2426096 | 2426152 | CSAR_peak_ | 8.39           | + |
| chr3 | 2426329 | 2426419 | CSAR_peak_ | 7.92           | + |
| chr3 | 2426538 | 2426601 | CSAR_peak_ | 13.48,9.77     | + |
| chr3 | 2426684 | 2426782 | CSAR_peak_ | 7.27           | + |
| chr3 | 2427169 | 2427219 | CSAR_peak_ | 8.65,6.57      | + |
| chr3 | 2427679 | 2427748 | CSAR_peak_ | 9.58           | + |
| chr3 | 2431131 | 2431179 | CSAR_peak_ | 12.13          | + |
| chr3 | 2437337 | 2437401 | CSAR_peak_ | 13.48          | + |
| chr3 | 2441995 | 2442059 | CSAR_peak_ | 7.27           | + |
| chr3 | 2442482 | 2442569 | CSAR_peak_ | 12.31          | + |
| chr3 | 2443381 | 2443417 | CSAR_peak_ | 6.44           | + |
| chr3 | 2443640 | 2443701 | CSAR_peak_ | 9.77           | + |
| chr3 | 2443924 | 2443995 | CSAR_peak_ | 9.58,9.58      | + |



|      |         |         |            |                  |   |
|------|---------|---------|------------|------------------|---|
| chr3 | 2455778 | 2455825 | CSAR_peak_ | 12.17            | + |
| chr3 | 2477316 | 2477380 | CSAR_peak_ | 16.33,9.58       | + |
| chr3 | 2477569 | 2477648 | CSAR_peak_ | 9.58             | + |
| chr3 | 2477692 | 2477734 | CSAR_peak_ | 6.57             | + |
| chr3 | 2478202 | 2478293 | CSAR_peak_ | 8.39             | + |
| chr3 | 2480745 | 2480794 | CSAR_peak_ | 9.58             | + |
| chr3 | 2483833 | 2483885 | CSAR_peak_ | 8.39             | + |
| chr3 | 2483905 | 2483957 | CSAR_peak_ | 7.27             | + |
| chr3 | 2485034 | 2485092 | CSAR_peak_ | 7.92,5.62        | + |
| chr3 | 2485216 | 2485285 | CSAR_peak_ | 6.95             | + |
| chr3 | 2485404 | 2485471 | CSAR_peak_ | 6.21,7.27        | + |
| chr3 | 2486008 | 2486051 | CSAR_peak_ | 7.27             | + |
| chr3 | 2486154 | 2486194 | CSAR_peak_ | 7.58             | + |
| chr3 | 2486249 | 2486285 | CSAR_peak_ | 8.95             | + |
| chr3 | 2486322 | 2486567 | CSAR_peak_ | 24.17,16.08      | + |
| chr3 | 2486578 | 2486658 | CSAR_peak_ | 20.43,6.78       | + |
| chr3 | 2486782 | 2486837 | CSAR_peak_ | 12.13            | + |
| chr3 | 2488002 | 2488055 | CSAR_peak_ | 6.03             | + |
| chr3 | 2488878 | 2488937 | CSAR_peak_ | 6.57             | + |
| chr3 | 2493790 | 2493829 | CSAR_peak_ | 6.44             | + |
| chr3 | 2493877 | 2493947 | CSAR_peak_ | 18.95,14.85      | + |
| chr3 | 2494026 | 2494068 | CSAR_peak_ | 8.28             | + |
| chr3 | 2494178 | 2494265 | CSAR_peak_ | 5.9,10.02        | + |
| chr3 | 2494276 | 2494289 | CSAR_peak_ | 8.39             | + |
| chr3 | 2494516 | 2494558 | CSAR_peak_ | 9.58             | + |
| chr3 | 2495078 | 2495123 | CSAR_peak_ | 7.27             | + |
| chr3 | 2508900 | 2508950 | CSAR_peak_ | 16.22,13.47,7.27 | + |
| chr3 | 2508967 | 2509021 | CSAR_peak_ | 88.7,127.81      | + |
| chr3 | 2599059 | 2599086 | CSAR_peak_ | 6.21             | + |
| chr3 | 2599397 | 2599443 | CSAR_peak_ | 8.39             | + |
| chr3 | 2645749 | 2645842 | CSAR_peak_ | 7.27,9.77        | + |
| chr3 | 2714021 | 2714059 | CSAR_peak_ | 6.21             | + |
| chr3 | 2714980 | 2715018 | CSAR_peak_ | 6.21             | + |
| chr3 | 2715204 | 2715262 | CSAR_peak_ | 11.14            | + |
| chr3 | 2715675 | 2715731 | CSAR_peak_ | 11.14            | + |
| chr3 | 2718086 | 2718149 | CSAR_peak_ | 7.92             | + |
| chr3 | 2718399 | 2718461 | CSAR_peak_ | 8.28             | + |
| chr3 | 2881050 | 2881107 | CSAR_peak_ | 8.39             | + |
| chr3 | 2946843 | 2946914 | CSAR_peak_ | 6.21,6.03,8.3    | + |
| chr3 | 2947095 | 2947141 | CSAR_peak_ | 6.21             | + |
| chr3 | 2947600 | 2947642 | CSAR_peak_ | 8.39,10.02       | + |
| chr3 | 2954825 | 2954920 | CSAR_peak_ | 10.02,8.95,7.27  | + |

|      |         |         |            |                |   |
|------|---------|---------|------------|----------------|---|
| chr3 | 2955350 | 2955400 | CSAR_peak_ | 9.58           | + |
| chr3 | 2956504 | 2956589 | CSAR_peak_ | 5.62,6.85      | + |
| chr3 | 2991027 | 2991090 | CSAR_peak_ | 10.83          | + |
| chr3 | 3016947 | 3016996 | CSAR_peak_ | 7.27           | + |
| chr3 | 3017535 | 3017577 | CSAR_peak_ | 5.62           | + |
| chr3 | 3020056 | 3020158 | CSAR_peak_ | 5.62,6.57      | + |
| chr3 | 3020230 | 3020353 | CSAR_peak_ | 10.02,10.83    | + |
| chr3 | 3020565 | 3020602 | CSAR_peak_ | 6.21           | + |
| chr3 | 3020618 | 3020680 | CSAR_peak_ | 10.02,6.1      | + |
| chr3 | 3020918 | 3021023 | CSAR_peak_ | 6.21           | + |
| chr3 | 3021183 | 3021246 | CSAR_peak_ | 8.3,15         | + |
| chr3 | 3021330 | 3021420 | CSAR_peak_ | 12.17,17.82    | + |
| chr3 | 3021670 | 3021713 | CSAR_peak_ | 6.45           | + |
| chr3 | 3021760 | 3021802 | CSAR_peak_ | 7.27           | + |
| chr3 | 3021938 | 3021970 | CSAR_peak_ | 6.21           | + |
| chr3 | 3022400 | 3022441 | CSAR_peak_ | 7.26,7.92,10.  | + |
| chr3 | 3022530 | 3022606 | CSAR_peak_ | 26.05,14.76    | + |
| chr3 | 3022742 | 3022763 | CSAR_peak_ | 6.21           | + |
| chr3 | 3031785 | 3031839 | CSAR_peak_ | 10.83          | + |
| chr3 | 3031868 | 3031909 | CSAR_peak_ | 6.95           | + |
| chr3 | 3033372 | 3033431 | CSAR_peak_ | 7.27           | + |
| chr3 | 3103028 | 3103078 | CSAR_peak_ | 6.85           | + |
| chr3 | 3103153 | 3103243 | CSAR_peak_ | 8.28,8.13      | + |
| chr3 | 3103358 | 3103412 | CSAR_peak_ | 18.95          | + |
| chr3 | 3103774 | 3103820 | CSAR_peak_ | 7.27,7.27      | + |
| chr3 | 3187057 | 3187097 | CSAR_peak_ | 11.38          | + |
| chr3 | 3187194 | 3187285 | CSAR_peak_ | 9.77,8.39      | + |
| chr3 | 3187343 | 3187447 | CSAR_peak_ | 28.34,11.14,;  | + |
| chr3 | 3187455 | 3187568 | CSAR_peak_ | 14.34,25.34,;  | + |
| chr3 | 3187691 | 3187755 | CSAR_peak_ | 26.27,21.81,;  | + |
| chr3 | 3187766 | 3187974 | CSAR_peak_ | 17.37,22.01,(+ |   |
| chr3 | 3188014 | 3188070 | CSAR_peak_ | 6.57,6.57      | + |
| chr3 | 3188206 | 3188274 | CSAR_peak_ | 7.27,11.14     | + |
| chr3 | 3268228 | 3268291 | CSAR_peak_ | 7.27           | + |
| chr3 | 3268940 | 3268998 | CSAR_peak_ | 10.62          | + |
| chr3 | 3269078 | 3269131 | CSAR_peak_ | 7.27           | + |
| chr3 | 3269962 | 3270052 | CSAR_peak_ | 12.13          | + |
| chr3 | 3270185 | 3270231 | CSAR_peak_ | 7.27           | + |
| chr3 | 3271079 | 3271132 | CSAR_peak_ | 6.21           | + |
| chr3 | 3272018 | 3272056 | CSAR_peak_ | 8.39,7.27      | + |
| chr3 | 3272917 | 3272962 | CSAR_peak_ | 8.65           | + |
| chr3 | 3272966 | 3273000 | CSAR_peak_ | 6.21           | + |

|      |         |         |            |               |   |
|------|---------|---------|------------|---------------|---|
| chr3 | 3273076 | 3273138 | CSAR_peak_ | 14.76         | + |
| chr3 | 3273300 | 3273324 | CSAR_peak_ | 6.21          | + |
| chr3 | 3419140 | 3419200 | CSAR_peak_ | 7.58          | + |
| chr3 | 3442887 | 3442942 | CSAR_peak_ | 7.27          | + |
| chr3 | 3455381 | 3455568 | CSAR_peak_ | 12.74,6.45,8. | + |
| chr3 | 3455899 | 3455959 | CSAR_peak_ | 11.66,6.21,8. | + |
| chr3 | 3455972 | 3456056 | CSAR_peak_ | 15.7,7.03     | + |
| chr3 | 3456057 | 3456327 | CSAR_peak_ | 8.3,12.66,7.4 | + |
| chr3 | 3456519 | 3456647 | CSAR_peak_ | 6.92,18.95,7. | + |
| chr3 | 3456657 | 3456726 | CSAR_peak_ | 6.21,8.65     | + |
| chr3 | 3456955 | 3457029 | CSAR_peak_ | 7.27,16.33    | + |
| chr3 | 3457281 | 3457328 | CSAR_peak_ | 6.21          | + |
| chr3 | 3500399 | 3500460 | CSAR_peak_ | 8.39          | + |
| chr3 | 3500694 | 3500745 | CSAR_peak_ | 7.58          | + |
| chr3 | 3500901 | 3500998 | CSAR_peak_ | 12.94,8.3     | + |
| chr3 | 3501081 | 3501163 | CSAR_peak_ | 6.21          | + |
| chr3 | 3501338 | 3501387 | CSAR_peak_ | 6.21          | + |
| chr3 | 3501774 | 3501818 | CSAR_peak_ | 6.57          | + |
| chr3 | 3517720 | 3517756 | CSAR_peak_ | 6.21          | + |
| chr3 | 3578623 | 3578690 | CSAR_peak_ | 12.13,8.39    | + |
| chr3 | 3579159 | 3579311 | CSAR_peak_ | 78.62,50.5    | + |
| chr3 | 3579819 | 3579824 | CSAR_peak_ | 5.9           | + |
| chr3 | 3592741 | 3592790 | CSAR_peak_ | 8.39          | + |
| chr3 | 3594003 | 3594117 | CSAR_peak_ | 9.27          | + |
| chr3 | 3603392 | 3603428 | CSAR_peak_ | 6.21          | + |
| chr3 | 3633952 | 3634000 | CSAR_peak_ | 10.83         | + |
| chr3 | 3639536 | 3639585 | CSAR_peak_ | 9.58,7.27     | + |
| chr3 | 3640255 | 3640309 | CSAR_peak_ | 6.21,7.58     | + |
| chr3 | 3641524 | 3641634 | CSAR_peak_ | 16.33,8.95,7. | + |
| chr3 | 3641965 | 3642010 | CSAR_peak_ | 7.58          | + |
| chr3 | 3642398 | 3642453 | CSAR_peak_ | 7.27          | + |
| chr3 | 3642533 | 3642564 | CSAR_peak_ | 10.83         | + |
| chr3 | 3642655 | 3642684 | CSAR_peak_ | 6.45          | + |
| chr3 | 3643048 | 3643091 | CSAR_peak_ | 11.66,9.03    | + |
| chr3 | 3643226 | 3643246 | CSAR_peak_ | 11.66         | + |
| chr3 | 3643260 | 3643296 | CSAR_peak_ | 6.21          | + |
| chr3 | 3643661 | 3643744 | CSAR_peak_ | 9.58,7.34,6.9 | + |
| chr3 | 3643894 | 3643926 | CSAR_peak_ | 12.13         | + |
| chr3 | 3644111 | 3644296 | CSAR_peak_ | 11.66,7.7,6.0 | + |
| chr3 | 3644643 | 3644764 | CSAR_peak_ | 6.03,10.31,6. | + |
| chr3 | 3645230 | 3645307 | CSAR_peak_ | 16.33,6.44,1. | + |
| chr3 | 3645397 | 3645471 | CSAR_peak_ | 10.02,6.37    | + |

|      |         |         |            |               |   |
|------|---------|---------|------------|---------------|---|
| chr3 | 3673682 | 3673730 | CSAR_peak_ | 6.44          | + |
| chr3 | 3699389 | 3699481 | CSAR_peak_ | 6.57,8.39     | + |
| chr3 | 3700022 | 3700110 | CSAR_peak_ | 6.03          | + |
| chr3 | 3700124 | 3700196 | CSAR_peak_ | 6.57          | + |
| chr3 | 3700264 | 3700310 | CSAR_peak_ | 7.34,7.7      | + |
| chr3 | 3700797 | 3700847 | CSAR_peak_ | 12.17         | + |
| chr3 | 3700954 | 3700995 | CSAR_peak_ | 6.95          | + |
| chr3 | 3752434 | 3752478 | CSAR_peak_ | 8.39          | + |
| chr3 | 3752758 | 3752875 | CSAR_peak_ | 9.58,12.31    | + |
| chr3 | 3776385 | 3776463 | CSAR_peak_ | 6.13          | + |
| chr3 | 3777180 | 3777234 | CSAR_peak_ | 10.76,15.2,1  | + |
| chr3 | 3824379 | 3824442 | CSAR_peak_ | 10.83,8.39    | + |
| chr3 | 3828692 | 3828731 | CSAR_peak_ | 6.95,11.14    | + |
| chr3 | 3829555 | 3829570 | CSAR_peak_ | 6.21          | + |
| chr3 | 3830925 | 3830964 | CSAR_peak_ | 10.83         | + |
| chr3 | 3831044 | 3831114 | CSAR_peak_ | 6.21,8.39,6.0 | + |
| chr3 | 3831850 | 3831874 | CSAR_peak_ | 7.27          | + |
| chr3 | 3831918 | 3831960 | CSAR_peak_ | 8.39          | + |
| chr3 | 3832345 | 3832407 | CSAR_peak_ | 7.92,6.57,9.5 | + |
| chr3 | 3833590 | 3833654 | CSAR_peak_ | 16.33         | + |
| chr3 | 3833720 | 3833800 | CSAR_peak_ | 7.34          | + |
| chr3 | 3833899 | 3833961 | CSAR_peak_ | 6.57          | + |
| chr3 | 3834140 | 3834208 | CSAR_peak_ | 7.27          | + |
| chr3 | 3848519 | 3848560 | CSAR_peak_ | 6.21          | + |
| chr3 | 3851212 | 3851267 | CSAR_peak_ | 9.58          | + |
| chr3 | 3919664 | 3919705 | CSAR_peak_ | 6.57,9.77     | + |
| chr3 | 3920717 | 3920796 | CSAR_peak_ | 7.27          | + |
| chr3 | 3920877 | 3920929 | CSAR_peak_ | 8.39          | + |
| chr3 | 3920942 | 3920982 | CSAR_peak_ | 10.62         | + |
| chr3 | 3921071 | 3921125 | CSAR_peak_ | 7.27          | + |
| chr3 | 3923857 | 3923915 | CSAR_peak_ | 8.65,16.33    | + |
| chr3 | 3923916 | 3924035 | CSAR_peak_ | 5.62,23.03,1  | + |
| chr3 | 3924067 | 3924085 | CSAR_peak_ | 7.34          | + |
| chr3 | 3924136 | 3924208 | CSAR_peak_ | 13.72         | + |
| chr3 | 3924268 | 3924341 | CSAR_peak_ | 12.13,35.4,1  | + |
| chr3 | 3924416 | 3924502 | CSAR_peak_ | 6.51,10.35,1  | + |
| chr3 | 3924617 | 3924937 | CSAR_peak_ | 7.58,9.27,18. | + |
| chr3 | 3924941 | 3925000 | CSAR_peak_ | 7.06,11.14,1  | + |
| chr3 | 3925020 | 3925140 | CSAR_peak_ | 8.28,10.95,1  | + |
| chr3 | 3925173 | 3925297 | CSAR_peak_ | 13,11.38,6.4  | + |
| chr3 | 3925342 | 3925404 | CSAR_peak_ | 7.27          | + |
| chr3 | 3935522 | 3935590 | CSAR_peak_ | 6.21          | + |

|      |         |         |            |               |   |
|------|---------|---------|------------|---------------|---|
| chr3 | 3935665 | 3935694 | CSAR_peak_ | 8.39          | + |
| chr3 | 3942663 | 3942743 | CSAR_peak_ | 9.79,6.03     | + |
| chr3 | 3959879 | 3959950 | CSAR_peak_ | 12.31,7.27    | + |
| chr3 | 3959982 | 3960030 | CSAR_peak_ | 6.03,6.57     | + |
| chr3 | 4005862 | 4005941 | CSAR_peak_ | 7.34          | + |
| chr3 | 4012990 | 4013055 | CSAR_peak_ | 24.17         | + |
| chr3 | 4013394 | 4013474 | CSAR_peak_ | 13.76,21.37   | + |
| chr3 | 4014418 | 4014433 | CSAR_peak_ | 8.39          | + |
| chr3 | 4014503 | 4014590 | CSAR_peak_ | 8.3,6.37      | + |
| chr3 | 4014712 | 4014772 | CSAR_peak_ | 7.92          | + |
| chr3 | 4014915 | 4014951 | CSAR_peak_ | 10.95         | + |
| chr3 | 4015042 | 4015148 | CSAR_peak_ | 13.51,7.36    | + |
| chr3 | 4015174 | 4015304 | CSAR_peak_ | 19.36,13.85   | + |
| chr3 | 4015592 | 4015626 | CSAR_peak_ | 13.44,10.95   | + |
| chr3 | 4015664 | 4015717 | CSAR_peak_ | 6.21          | + |
| chr3 | 4015769 | 4015853 | CSAR_peak_ | 6.57,6.85     | + |
| chr3 | 4015947 | 4015993 | CSAR_peak_ | 8.39          | + |
| chr3 | 4016265 | 4016299 | CSAR_peak_ | 8.65          | + |
| chr3 | 4016341 | 4016431 | CSAR_peak_ | 23.82,29.36,  | + |
| chr3 | 4016571 | 4016622 | CSAR_peak_ | 8.65          | + |
| chr3 | 4016629 | 4016692 | CSAR_peak_ | 7.26,12.21,1. | + |
| chr3 | 4016788 | 4016838 | CSAR_peak_ | 6.95          | + |
| chr3 | 4016896 | 4016907 | CSAR_peak_ | 7.27          | + |
| chr3 | 4016945 | 4017005 | CSAR_peak_ | 8.95          | + |
| chr3 | 4017038 | 4017103 | CSAR_peak_ | 14.88,6.85,7. | + |
| chr3 | 4017207 | 4017295 | CSAR_peak_ | 7.73,17.52    | + |
| chr3 | 4017520 | 4017609 | CSAR_peak_ | 9.32,9.58,10. | + |
| chr3 | 4017638 | 4017674 | CSAR_peak_ | 6.02          | + |
| chr3 | 4017866 | 4017952 | CSAR_peak_ | 11.66,7.29,7. | + |
| chr3 | 4017978 | 4018018 | CSAR_peak_ | 7.27          | + |
| chr3 | 4018062 | 4018128 | CSAR_peak_ | 14.88,8.13    | + |
| chr3 | 4050238 | 4050269 | CSAR_peak_ | 8.65          | + |
| chr3 | 4050376 | 4050457 | CSAR_peak_ | 10.62,7.73,1. | + |
| chr3 | 4050550 | 4050616 | CSAR_peak_ | 14.88,9.77    | + |
| chr3 | 4050888 | 4050915 | CSAR_peak_ | 7.27          | + |
| chr3 | 4051020 | 4051038 | CSAR_peak_ | 8.65          | + |
| chr3 | 4051130 | 4051202 | CSAR_peak_ | 12.13,8.65    | + |
| chr3 | 4051317 | 4051357 | CSAR_peak_ | 7.26          | + |
| chr3 | 4051927 | 4052008 | CSAR_peak_ | 6.57          | + |
| chr3 | 4065674 | 4065721 | CSAR_peak_ | 7.27          | + |
| chr3 | 4065889 | 4065931 | CSAR_peak_ | 7.73          | + |
| chr3 | 4066018 | 4066044 | CSAR_peak_ | 6.95          | + |

|      |         |         |            |               |   |
|------|---------|---------|------------|---------------|---|
| chr3 | 4066407 | 4066470 | CSAR_peak_ | 8.13          | + |
| chr3 | 4067180 | 4067285 | CSAR_peak_ | 6.21,9.58,8.1 | + |
| chr3 | 4067433 | 4067511 | CSAR_peak_ | 9.58          | + |
| chr3 | 4068202 | 4068271 | CSAR_peak_ | 6.57,6.21,9.2 | + |
| chr3 | 4071404 | 4071505 | CSAR_peak_ | 9.58,6.57     | + |
| chr3 | 4071509 | 4071578 | CSAR_peak_ | 13.44,6.45    | + |
| chr3 | 4071711 | 4071760 | CSAR_peak_ | 8.39          | + |
| chr3 | 4072257 | 4072314 | CSAR_peak_ | 8.39,6.21     | + |
| chr3 | 4148750 | 4148799 | CSAR_peak_ | 6.21          | + |
| chr3 | 4150308 | 4150363 | CSAR_peak_ | 6.21          | + |
| chr3 | 4151263 | 4151313 | CSAR_peak_ | 7.58          | + |
| chr3 | 4183156 | 4183208 | CSAR_peak_ | 16.33,12.13   | + |
| chr3 | 4183293 | 4183339 | CSAR_peak_ | 20.43,8.39    | + |
| chr3 | 4184784 | 4184800 | CSAR_peak_ | 6.21          | + |
| chr3 | 4185477 | 4185560 | CSAR_peak_ | 10.83         | + |
| chr3 | 4185674 | 4185725 | CSAR_peak_ | 6.22,12.31    | + |
| chr3 | 4185927 | 4186009 | CSAR_peak_ | 6.54,12.31    | + |
| chr3 | 4186320 | 4186365 | CSAR_peak_ | 7.92          | + |
| chr3 | 4186445 | 4186495 | CSAR_peak_ | 6.95          | + |
| chr3 | 4187812 | 4187865 | CSAR_peak_ | 7.92,6.03     | + |
| chr3 | 4187968 | 4188016 | CSAR_peak_ | 8.95,7.73     | + |
| chr3 | 4188248 | 4188344 | CSAR_peak_ | 8.65,9.58     | + |
| chr3 | 4188919 | 4188969 | CSAR_peak_ | 8.65,10.94,6. | + |
| chr3 | 4189056 | 4189063 | CSAR_peak_ | 9.03          | + |
| chr3 | 4189944 | 4190008 | CSAR_peak_ | 8.95          | + |
| chr3 | 4255221 | 4255287 | CSAR_peak_ | 9.58          | + |
| chr3 | 4255486 | 4255592 | CSAR_peak_ | 9.77,5.62     | + |
| chr3 | 4255766 | 4255862 | CSAR_peak_ | 7.27          | + |
| chr3 | 4275727 | 4275818 | CSAR_peak_ | 6.94,8.13     | + |
| chr3 | 4276176 | 4276210 | CSAR_peak_ | 6.95          | + |
| chr3 | 4288654 | 4288731 | CSAR_peak_ | 9.58          | + |
| chr3 | 4290217 | 4290256 | CSAR_peak_ | 6.95          | + |
| chr3 | 4290397 | 4290436 | CSAR_peak_ | 6.53          | + |
| chr3 | 4291050 | 4291112 | CSAR_peak_ | 14.93,6.95    | + |
| chr3 | 4291250 | 4291300 | CSAR_peak_ | 37.55,11.14   | + |
| chr3 | 4291357 | 4291396 | CSAR_peak_ | 12.31         | + |
| chr3 | 4292866 | 4292914 | CSAR_peak_ | 8.95          | + |
| chr3 | 4302157 | 4302215 | CSAR_peak_ | 6.57          | + |
| chr3 | 4306990 | 4307062 | CSAR_peak_ | 6.57          | + |
| chr3 | 4308044 | 4308097 | CSAR_peak_ | 9.77          | + |
| chr3 | 4309429 | 4309495 | CSAR_peak_ | 7.27          | + |
| chr3 | 4332380 | 4332514 | CSAR_peak_ | 11.96,14.36,  | + |

|      |         |         |            |                |
|------|---------|---------|------------|----------------|
| chr3 | 4332625 | 4332706 | CSAR_peak_ | 6.03,10.31,7.+ |
| chr3 | 4332731 | 4332793 | CSAR_peak_ | 8.65,12.13 +   |
| chr3 | 4332878 | 4332946 | CSAR_peak_ | 10.95,17.37,(+ |
| chr3 | 4333723 | 4333798 | CSAR_peak_ | 8.39,14.76 +   |
| chr3 | 4334021 | 4334086 | CSAR_peak_ | 11.66 +        |
| chr3 | 4380819 | 4380874 | CSAR_peak_ | 10.83,8.39 +   |
| chr3 | 4380972 | 4380990 | CSAR_peak_ | 6.03 +         |
| chr3 | 4409142 | 4409188 | CSAR_peak_ | 7.27 +         |
| chr3 | 4411161 | 4411239 | CSAR_peak_ | 7.6,19.32 +    |
| chr3 | 4411286 | 4411444 | CSAR_peak_ | 90.82,8.85,1(+ |
| chr3 | 4469768 | 4469812 | CSAR_peak_ | 6.95 +         |
| chr3 | 4470041 | 4470052 | CSAR_peak_ | 6.21 +         |
| chr3 | 4470394 | 4470422 | CSAR_peak_ | 14.76 +        |
| chr3 | 4470511 | 4470567 | CSAR_peak_ | 6.87,6.57 +    |
| chr3 | 4470791 | 4470831 | CSAR_peak_ | 6.95 +         |
| chr3 | 4471070 | 4471108 | CSAR_peak_ | 8.39 +         |
| chr3 | 4471170 | 4471235 | CSAR_peak_ | 6.44,13.66 +   |
| chr3 | 4472265 | 4472340 | CSAR_peak_ | 7.27 +         |
| chr3 | 4473175 | 4473253 | CSAR_peak_ | 7.27 +         |
| chr3 | 4511120 | 4511210 | CSAR_peak_ | 25.22,8.5 +    |
| chr3 | 4511473 | 4511542 | CSAR_peak_ | 13.51,11.32 +  |
| chr3 | 4511608 | 4511727 | CSAR_peak_ | 8.65,9.58,16.+ |
| chr3 | 4511765 | 4511829 | CSAR_peak_ | 7.67,17.49 +   |
| chr3 | 4511921 | 4512004 | CSAR_peak_ | 21.8,15.37 +   |
| chr3 | 4512038 | 4512383 | CSAR_peak_ | 13.66,8.39,1(+ |
| chr3 | 4512435 | 4512461 | CSAR_peak_ | 5.9 +          |
| chr3 | 4512791 | 4512965 | CSAR_peak_ | 23.2,11.41,1(+ |
| chr3 | 4513006 | 4513076 | CSAR_peak_ | 14.08,7.58 +   |
| chr3 | 4513126 | 4513200 | CSAR_peak_ | 18.95,11.8,2(+ |
| chr3 | 4513223 | 4513269 | CSAR_peak_ | 9.08 +         |
| chr3 | 4513307 | 4513727 | CSAR_peak_ | 9.61,6.87,10.+ |
| chr3 | 4513776 | 4513883 | CSAR_peak_ | 34.13,21.94,(+ |
| chr3 | 4513933 | 4514056 | CSAR_peak_ | 19.48,12.5,2(+ |
| chr3 | 4514058 | 4514113 | CSAR_peak_ | 8.95,14.88,1(+ |
| chr3 | 4514122 | 4514247 | CSAR_peak_ | 8.58,6.14,17.+ |
| chr3 | 4514326 | 4514467 | CSAR_peak_ | 11.41,8.3,7.5+ |
| chr3 | 4514531 | 4514727 | CSAR_peak_ | 8.65,12.31,2(+ |
| chr3 | 4514728 | 4514848 | CSAR_peak_ | 13 +           |
| chr3 | 4514921 | 4514960 | CSAR_peak_ | 7.36 +         |
| chr3 | 4515101 | 4515157 | CSAR_peak_ | 8.5,6.53 +     |
| chr3 | 4515176 | 4515274 | CSAR_peak_ | 7.58,12.14 +   |
| chr3 | 4515291 | 4515500 | CSAR_peak_ | 16.28,27.96,(+ |

|      |         |         |            |                 |
|------|---------|---------|------------|-----------------|
| chr3 | 4515642 | 4515876 | CSAR_peak_ | 9.02,9.97,27. + |
| chr3 | 4515882 | 4515905 | CSAR_peak_ | 6.95 +          |
| chr3 | 4515922 | 4515933 | CSAR_peak_ | 6.03 +          |
| chr3 | 4521763 | 4521823 | CSAR_peak_ | 10.83 +         |
| chr3 | 4561104 | 4561210 | CSAR_peak_ | 279.33,240.1 +  |
| chr3 | 4637422 | 4637491 | CSAR_peak_ | 8.39 +          |
| chr3 | 4637685 | 4637725 | CSAR_peak_ | 6.44 +          |
| chr3 | 4637978 | 4638000 | CSAR_peak_ | 6.21 +          |
| chr3 | 4638007 | 4638045 | CSAR_peak_ | 6.37,5.67,8.5 + |
| chr3 | 4638462 | 4638524 | CSAR_peak_ | 12.13 +         |
| chr3 | 4638582 | 4638640 | CSAR_peak_ | 29.89,15.9 +    |
| chr3 | 4638723 | 4638738 | CSAR_peak_ | 9.27 +          |
| chr3 | 4638847 | 4638864 | CSAR_peak_ | 7.27 +          |
| chr3 | 4638904 | 4638993 | CSAR_peak_ | 6.37,6.95 +     |
| chr3 | 4639007 | 4639024 | CSAR_peak_ | 6.57 +          |
| chr3 | 4639364 | 4639398 | CSAR_peak_ | 8.39 +          |
| chr3 | 4640123 | 4640165 | CSAR_peak_ | 6.21 +          |
| chr3 | 4640431 | 4640470 | CSAR_peak_ | 9.77 +          |
| chr3 | 4673022 | 4673064 | CSAR_peak_ | 6.21 +          |
| chr3 | 4753925 | 4753976 | CSAR_peak_ | 14.76,6.44,5. + |
| chr3 | 4754789 | 4754836 | CSAR_peak_ | 7.27 +          |
| chr3 | 4755713 | 4755842 | CSAR_peak_ | 10.94,8.65 +    |
| chr3 | 4755849 | 4755923 | CSAR_peak_ | 10.95 +         |
| chr3 | 4755944 | 4756024 | CSAR_peak_ | 10.52,7.36,9. + |
| chr3 | 4756053 | 4756078 | CSAR_peak_ | 8.39 +          |
| chr3 | 4756883 | 4756974 | CSAR_peak_ | 7.27,10.83 +    |
| chr3 | 4758054 | 4758104 | CSAR_peak_ | 6.21 +          |
| chr3 | 4758554 | 4758597 | CSAR_peak_ | 19.01 +         |
| chr3 | 4758724 | 4758806 | CSAR_peak_ | 13.66,6.64,1. + |
| chr3 | 4759425 | 4759475 | CSAR_peak_ | 6.21 +          |
| chr3 | 4760885 | 4760987 | CSAR_peak_ | 6.21 +          |
| chr3 | 4818519 | 4818537 | CSAR_peak_ | 7.27 +          |
| chr3 | 4818738 | 4818804 | CSAR_peak_ | 14.88 +         |
| chr3 | 4818903 | 4818962 | CSAR_peak_ | 6.21,7.27 +     |
| chr3 | 4819003 | 4819028 | CSAR_peak_ | 6.21 +          |
| chr3 | 4819139 | 4819186 | CSAR_peak_ | 13.44,8.39 +    |
| chr3 | 4819395 | 4819452 | CSAR_peak_ | 5.62,6.03 +     |
| chr3 | 4819517 | 4819584 | CSAR_peak_ | 16.33,8.52 +    |
| chr3 | 4819688 | 4819761 | CSAR_peak_ | 8.3 +           |
| chr3 | 4820037 | 4820088 | CSAR_peak_ | 6.57 +          |
| chr3 | 4820396 | 4820484 | CSAR_peak_ | 8.39,7.73 +     |
| chr3 | 4821780 | 4821859 | CSAR_peak_ | 11.38 +         |



|      |         |         |            |              |   |
|------|---------|---------|------------|--------------|---|
| chr3 | 4821999 | 4822047 | CSAR_peak_ | 7.27         | + |
| chr3 | 4822687 | 4822740 | CSAR_peak_ | 10.02,8.39   | + |
| chr3 | 4909158 | 4909194 | CSAR_peak_ | 6.03         | + |
| chr3 | 4909669 | 4909875 | CSAR_peak_ | 20.94,10.02, | + |
| chr3 | 4909904 | 4909997 | CSAR_peak_ | 9.58,6.21    | + |
| chr3 | 4910000 | 4910062 | CSAR_peak_ | 10.25        | + |
| chr3 | 4910164 | 4910189 | CSAR_peak_ | 8.94,8.5     | + |
| chr3 | 4910200 | 4910242 | CSAR_peak_ | 6.74         | + |
| chr3 | 4910244 | 4910307 | CSAR_peak_ | 17.82        | + |
| chr3 | 4910425 | 4910511 | CSAR_peak_ | 10.83        | + |
| chr3 | 4910604 | 4910645 | CSAR_peak_ | 9.58         | + |
| chr3 | 4910720 | 4910783 | CSAR_peak_ | 14.59,8.65   | + |
| chr3 | 4910790 | 4910940 | CSAR_peak_ | 13.44,19.36  | + |
| chr3 | 4910977 | 4911039 | CSAR_peak_ | 7.27         | + |
| chr3 | 4911171 | 4911217 | CSAR_peak_ | 7.58         | + |
| chr3 | 4911286 | 4911349 | CSAR_peak_ | 24.17,7.06,1 | + |
| chr3 | 4911443 | 4911549 | CSAR_peak_ | 16.22,11.38, | + |
| chr3 | 4911585 | 4911636 | CSAR_peak_ | 8.44,5.9     | + |
| chr3 | 4911638 | 4911699 | CSAR_peak_ | 13.48        | + |
| chr3 | 4911737 | 4911814 | CSAR_peak_ | 6.57         | + |
| chr3 | 4911857 | 4911911 | CSAR_peak_ | 8.39         | + |
| chr3 | 4912239 | 4912339 | CSAR_peak_ | 7.27,7.58    | + |
| chr3 | 4912353 | 4912425 | CSAR_peak_ | 10.83,12.31  | + |
| chr3 | 4912531 | 4912657 | CSAR_peak_ | 7.34,7.29    | + |
| chr3 | 4912859 | 4912986 | CSAR_peak_ | 10.83,8.65   | + |
| chr3 | 4913350 | 4913399 | CSAR_peak_ | 7.27         | + |
| chr3 | 4913559 | 4913611 | CSAR_peak_ | 8.39         | + |
| chr3 | 4913619 | 4913702 | CSAR_peak_ | 8.09         | + |
| chr3 | 4913866 | 4913933 | CSAR_peak_ | 6.85,7.58    | + |
| chr3 | 4914225 | 4914264 | CSAR_peak_ | 6.57         | + |
| chr3 | 4914333 | 4914390 | CSAR_peak_ | 6.21         | + |
| chr3 | 4915364 | 4915392 | CSAR_peak_ | 11.14        | + |
| chr3 | 4915515 | 4915564 | CSAR_peak_ | 7.27         | + |
| chr3 | 4915665 | 4915689 | CSAR_peak_ | 6.57,6.21    | + |
| chr3 | 4916198 | 4916323 | CSAR_peak_ | 12.13        | + |
| chr3 | 4922943 | 4922984 | CSAR_peak_ | 7.27         | + |
| chr3 | 4924954 | 4925007 | CSAR_peak_ | 7.27         | + |
| chr3 | 4925192 | 4925234 | CSAR_peak_ | 6.87         | + |
| chr3 | 4925502 | 4925548 | CSAR_peak_ | 10.83,7.34   | + |
| chr3 | 4925585 | 4925673 | CSAR_peak_ | 21.56,8.65,1 | + |
| chr3 | 4926075 | 4926114 | CSAR_peak_ | 5.62         | + |
| chr3 | 4926245 | 4926303 | CSAR_peak_ | 7.34         | + |

|      |         |         |            |                |   |
|------|---------|---------|------------|----------------|---|
| chr3 | 4926345 | 4926407 | CSAR_peak_ | 6.85,9.43      | + |
| chr3 | 4937424 | 4937493 | CSAR_peak_ | 8.39           | + |
| chr3 | 4938130 | 4938177 | CSAR_peak_ | 7.34           | + |
| chr3 | 4938455 | 4938507 | CSAR_peak_ | 8.39,6.57      | + |
| chr3 | 4938554 | 4938656 | CSAR_peak_ | 16.33,5.71,8.  | + |
| chr3 | 4938659 | 4938765 | CSAR_peak_ | 6.21           | + |
| chr3 | 4945947 | 4945995 | CSAR_peak_ | 7.27           | + |
| chr3 | 4947231 | 4947300 | CSAR_peak_ | 10.31          | + |
| chr3 | 4951589 | 4951697 | CSAR_peak_ | 319.05,254.5   | + |
| chr3 | 4988333 | 4988371 | CSAR_peak_ | 7.26           | + |
| chr3 | 4988593 | 4988638 | CSAR_peak_ | 8.39,7.27      | + |
| chr3 | 4988923 | 4988956 | CSAR_peak_ | 7.27           | + |
| chr3 | 4989090 | 4989121 | CSAR_peak_ | 9.58           | + |
| chr3 | 4989367 | 4989494 | CSAR_peak_ | 27.64,19.36    | + |
| chr3 | 4989593 | 4989666 | CSAR_peak_ | 8.18,21.24     | + |
| chr3 | 4989711 | 4989780 | CSAR_peak_ | 20.43,8.39     | + |
| chr3 | 4989834 | 4989909 | CSAR_peak_ | 7.58,9.58      | + |
| chr3 | 4989958 | 4990025 | CSAR_peak_ | 17.37,6.21     | + |
| chr3 | 4990177 | 4990240 | CSAR_peak_ | 10.02          | + |
| chr3 | 4990272 | 4990314 | CSAR_peak_ | 10.02,8.39     | + |
| chr3 | 4990322 | 4990535 | CSAR_peak_ | 17.52,13.51,   | + |
| chr3 | 4990572 | 4990693 | CSAR_peak_ | 9.77,10.92,10. | + |
| chr3 | 4990793 | 4990866 | CSAR_peak_ | 14.92,9.31     | + |
| chr3 | 4990925 | 4991039 | CSAR_peak_ | 10.83,19.36,   | + |
| chr3 | 4991232 | 4991273 | CSAR_peak_ | 9.58           | + |
| chr3 | 4991309 | 4991359 | CSAR_peak_ | 5.62           | + |
| chr3 | 4991381 | 4991482 | CSAR_peak_ | 7.27,11.63,9.  | + |
| chr3 | 4991498 | 4991632 | CSAR_peak_ | 13.72,14.88,   | + |
| chr3 | 4991710 | 4991870 | CSAR_peak_ | 22.74,13.66,   | + |
| chr3 | 4992255 | 4992300 | CSAR_peak_ | 8.72,6.95,9.9  | + |
| chr3 | 4992465 | 4992566 | CSAR_peak_ | 8.61,7.25,5.6  | + |
| chr3 | 4992604 | 4992681 | CSAR_peak_ | 6.28,7.18      | + |
| chr3 | 4992753 | 4992822 | CSAR_peak_ | 6.03,9.58      | + |
| chr3 | 4992914 | 4993054 | CSAR_peak_ | 14.93,16.22    | + |
| chr3 | 4993084 | 4993189 | CSAR_peak_ | 11.14,13.51    | + |
| chr3 | 4993290 | 4993382 | CSAR_peak_ | 16.77,7.58     | + |
| chr3 | 4993522 | 4993631 | CSAR_peak_ | 6.71,6.45      | + |
| chr3 | 4993668 | 4993714 | CSAR_peak_ | 9.27           | + |
| chr3 | 5047618 | 5047656 | CSAR_peak_ | 6.57           | + |
| chr3 | 5047782 | 5047836 | CSAR_peak_ | 16.33,8.39     | + |
| chr3 | 5048057 | 5048114 | CSAR_peak_ | 8.65,7.27      | + |
| chr3 | 5048129 | 5048205 | CSAR_peak_ | 8.3            | + |

|      |         |         |            |                  |   |
|------|---------|---------|------------|------------------|---|
| chr3 | 5048228 | 5048288 | CSAR_peak_ | 14.88,12.31,7.58 | + |
| chr3 | 5048354 | 5048363 | CSAR_peak_ | 7.58             | + |
| chr3 | 5048473 | 5048587 | CSAR_peak_ | 6.03,13,6.21,    | + |
| chr3 | 5048619 | 5048712 | CSAR_peak_ | 16.33,7.27       | + |
| chr3 | 5048870 | 5048895 | CSAR_peak_ | 6.37,16.11       | + |
| chr3 | 5049043 | 5049099 | CSAR_peak_ | 6.95,6.05,7.5    | + |
| chr3 | 5049143 | 5049225 | CSAR_peak_ | 7.92,11.06       | + |
| chr3 | 5049303 | 5049335 | CSAR_peak_ | 6.02             | + |
| chr3 | 5049402 | 5049530 | CSAR_peak_ | 16.6,6.87        | + |
| chr3 | 5049697 | 5049778 | CSAR_peak_ | 20.94,7.26       | + |
| chr3 | 5051560 | 5051604 | CSAR_peak_ | 6.21             | + |
| chr3 | 5052775 | 5052875 | CSAR_peak_ | 9.77,9.58        | + |
| chr3 | 5053379 | 5053458 | CSAR_peak_ | 8.39,6.44        | + |
| chr3 | 5053459 | 5053549 | CSAR_peak_ | 8.39,6.57        | + |
| chr3 | 5053617 | 5053681 | CSAR_peak_ | 6.95,9.41        | + |
| chr3 | 5053800 | 5053854 | CSAR_peak_ | 7.34             | + |
| chr3 | 5054938 | 5055017 | CSAR_peak_ | 8.39,10.83       | + |
| chr3 | 5055126 | 5055186 | CSAR_peak_ | 8.39             | + |
| chr3 | 5055198 | 5055236 | CSAR_peak_ | 7.27             | + |
| chr3 | 5055251 | 5055316 | CSAR_peak_ | 8.65             | + |
| chr3 | 5055656 | 5055701 | CSAR_peak_ | 10.83            | + |
| chr3 | 5055702 | 5055774 | CSAR_peak_ | 14.76            | + |
| chr3 | 5056915 | 5056976 | CSAR_peak_ | 8.39             | + |
| chr3 | 5114827 | 5114897 | CSAR_peak_ | 8.65             | + |
| chr3 | 5116516 | 5116581 | CSAR_peak_ | 13.44            | + |
| chr3 | 5116613 | 5116727 | CSAR_peak_ | 8.39,9.77        | + |
| chr3 | 5117143 | 5117180 | CSAR_peak_ | 6.57             | + |
| chr3 | 5117229 | 5117307 | CSAR_peak_ | 10.83,6.21       | + |
| chr3 | 5121467 | 5121554 | CSAR_peak_ | 14.93,6.72       | + |
| chr3 | 5121723 | 5121765 | CSAR_peak_ | 9.03             | + |
| chr3 | 5121780 | 5121841 | CSAR_peak_ | 11.14            | + |
| chr3 | 5121848 | 5121900 | CSAR_peak_ | 24.63,6.81       | + |
| chr3 | 5121932 | 5121970 | CSAR_peak_ | 7.82             | + |
| chr3 | 5121994 | 5122062 | CSAR_peak_ | 9.49             | + |
| chr3 | 5122291 | 5122404 | CSAR_peak_ | 28.53,44.25      | + |
| chr3 | 5122502 | 5122722 | CSAR_peak_ | 12.74,6.64,2.1   | + |
| chr3 | 5122847 | 5123127 | CSAR_peak_ | 6.03,29.4,16.1   | + |
| chr3 | 5123171 | 5123268 | CSAR_peak_ | 13.29,5.84       | + |
| chr3 | 5123276 | 5123479 | CSAR_peak_ | 22.69,25.54,1.1  | + |
| chr3 | 5123536 | 5123609 | CSAR_peak_ | 7.58             | + |
| chr3 | 5123617 | 5123643 | CSAR_peak_ | 6.57             | + |
| chr3 | 5123645 | 5123707 | CSAR_peak_ | 14.85,9.41       | + |

|      |         |         |            |               |   |
|------|---------|---------|------------|---------------|---|
| chr3 | 5176779 | 5176810 | CSAR_peak_ | 6.03          | + |
| chr3 | 5188582 | 5188710 | CSAR_peak_ | 7.27,6.57,6.5 | + |
| chr3 | 5189361 | 5189387 | CSAR_peak_ | 6.21          | + |
| chr3 | 5189407 | 5189449 | CSAR_peak_ | 6.44,7.27     | + |
| chr3 | 5210677 | 5210734 | CSAR_peak_ | 7.27          | + |
| chr3 | 5213009 | 5213433 | CSAR_peak_ | 24.5,12.75,2  | + |
| chr3 | 5213455 | 5213518 | CSAR_peak_ | 7.93,6.32     | + |
| chr3 | 5213641 | 5213837 | CSAR_peak_ | 22.85,44.03,( | + |
| chr3 | 5213862 | 5213911 | CSAR_peak_ | 10.47         | + |
| chr3 | 5214015 | 5214113 | CSAR_peak_ | 10.02,11.14   | + |
| chr3 | 5214409 | 5214478 | CSAR_peak_ | 11.14,7.27    | + |
| chr3 | 5214578 | 5214619 | CSAR_peak_ | 6.21          | + |
| chr3 | 5214652 | 5214694 | CSAR_peak_ | 6.21          | + |
| chr3 | 5214763 | 5214835 | CSAR_peak_ | 12.13         | + |
| chr3 | 5214850 | 5214924 | CSAR_peak_ | 13.48,12.13   | + |
| chr3 | 5215091 | 5215155 | CSAR_peak_ | 10.95         | + |
| chr3 | 5215179 | 5215232 | CSAR_peak_ | 9.58          | + |
| chr3 | 5215270 | 5215353 | CSAR_peak_ | 12.13,13.48   | + |
| chr3 | 5215518 | 5215560 | CSAR_peak_ | 9.58          | + |
| chr3 | 5215986 | 5216029 | CSAR_peak_ | 7.27          | + |
| chr3 | 5234811 | 5234847 | CSAR_peak_ | 6.57          | + |
| chr3 | 5234867 | 5234912 | CSAR_peak_ | 7.27,7.27     | + |
| chr3 | 5235066 | 5235118 | CSAR_peak_ | 6.37          | + |
| chr3 | 5235199 | 5235292 | CSAR_peak_ | 10.02,13.85,( | + |
| chr3 | 5235379 | 5235488 | CSAR_peak_ | 16.11,12.13   | + |
| chr3 | 5235535 | 5235573 | CSAR_peak_ | 7.27          | + |
| chr3 | 5235953 | 5235992 | CSAR_peak_ | 12.74         | + |
| chr3 | 5299688 | 5299753 | CSAR_peak_ | 9.61          | + |
| chr3 | 5330362 | 5330420 | CSAR_peak_ | 24.21,20.13,( | + |
| chr3 | 5330827 | 5330946 | CSAR_peak_ | 21.37,16.34,( | + |
| chr3 | 5331037 | 5331199 | CSAR_peak_ | 21.1,14.76,1  | + |
| chr3 | 5331278 | 5331306 | CSAR_peak_ | 6.57          | + |
| chr3 | 5331584 | 5331768 | CSAR_peak_ | 10.96,7.36    | + |
| chr3 | 5331876 | 5331924 | CSAR_peak_ | 9.58          | + |
| chr3 | 5331972 | 5332059 | CSAR_peak_ | 9.72          | + |
| chr3 | 5332392 | 5332469 | CSAR_peak_ | 12.17,7.27    | + |
| chr3 | 5332590 | 5332681 | CSAR_peak_ | 6.64          | + |
| chr3 | 5332686 | 5332773 | CSAR_peak_ | 6.02,8.59     | + |
| chr3 | 5332869 | 5332957 | CSAR_peak_ | 9.58,6.57     | + |
| chr3 | 5332958 | 5333023 | CSAR_peak_ | 5.62,8.39     | + |
| chr3 | 5333041 | 5333140 | CSAR_peak_ | 7.27          | + |
| chr3 | 5333182 | 5333240 | CSAR_peak_ | 12.17         | + |

|      |         |         |            |                  |   |
|------|---------|---------|------------|------------------|---|
| chr3 | 5333251 | 5333289 | CSAR_peak_ | 6.21             | + |
| chr3 | 5333367 | 5333457 | CSAR_peak_ | 8.39,8.13        | + |
| chr3 | 5333868 | 5333910 | CSAR_peak_ | 6.95             | + |
| chr3 | 5333936 | 5333999 | CSAR_peak_ | 6.1,10.83        | + |
| chr3 | 5334063 | 5334165 | CSAR_peak_ | 8.39,14.88       | + |
| chr3 | 5334215 | 5334291 | CSAR_peak_ | 6.95,9.58        | + |
| chr3 | 5334421 | 5334512 | CSAR_peak_ | 10.83            | + |
| chr3 | 5334701 | 5334774 | CSAR_peak_ | 16.33,6.85,10.83 | + |
| chr3 | 5335065 | 5335105 | CSAR_peak_ | 6.57             | + |
| chr3 | 5335245 | 5335286 | CSAR_peak_ | 5.62             | + |
| chr3 | 5335507 | 5335590 | CSAR_peak_ | 6.32,7.61,13.14  | + |
| chr3 | 5335651 | 5335722 | CSAR_peak_ | 6.21,11.14       | + |
| chr3 | 5335733 | 5335793 | CSAR_peak_ | 10.83,10.95      | + |
| chr3 | 5335878 | 5335889 | CSAR_peak_ | 6.03             | + |
| chr3 | 5336071 | 5336128 | CSAR_peak_ | 7.27             | + |
| chr3 | 5337720 | 5337777 | CSAR_peak_ | 6.21             | + |
| chr3 | 5338055 | 5338098 | CSAR_peak_ | 6.03             | + |
| chr3 | 5340465 | 5340517 | CSAR_peak_ | 7.27             | + |
| chr3 | 5340825 | 5340875 | CSAR_peak_ | 7.73             | + |
| chr3 | 5340882 | 5341079 | CSAR_peak_ | 10.25,6.58,10.83 | + |
| chr3 | 5341168 | 5341215 | CSAR_peak_ | 8.95,6.57        | + |
| chr3 | 5341356 | 5341393 | CSAR_peak_ | 7.27             | + |
| chr3 | 5341504 | 5341558 | CSAR_peak_ | 8.39             | + |
| chr3 | 5343741 | 5343942 | CSAR_peak_ | 12.27,8.19,10.83 | + |
| chr3 | 5344006 | 5344058 | CSAR_peak_ | 8.95             | + |
| chr3 | 5344150 | 5344333 | CSAR_peak_ | 7.58,10.83,10.83 | + |
| chr3 | 5344482 | 5344540 | CSAR_peak_ | 8.65             | + |
| chr3 | 5351430 | 5351453 | CSAR_peak_ | 5.62             | + |
| chr3 | 5351619 | 5351664 | CSAR_peak_ | 7.27             | + |
| chr3 | 5352514 | 5352550 | CSAR_peak_ | 6.21             | + |
| chr3 | 5352868 | 5352902 | CSAR_peak_ | 6.21             | + |
| chr3 | 5360668 | 5360705 | CSAR_peak_ | 8.13             | + |
| chr3 | 5387183 | 5387273 | CSAR_peak_ | 109.86,43.35     | + |
| chr3 | 5428936 | 5428999 | CSAR_peak_ | 7.27             | + |
| chr3 | 5430384 | 5430432 | CSAR_peak_ | 6.21             | + |
| chr3 | 5498209 | 5498253 | CSAR_peak_ | 6.21             | + |
| chr3 | 5498540 | 5498587 | CSAR_peak_ | 6.57             | + |
| chr3 | 5505532 | 5505571 | CSAR_peak_ | 6.95             | + |
| chr3 | 5505648 | 5505661 | CSAR_peak_ | 9.43             | + |
| chr3 | 5505758 | 5505867 | CSAR_peak_ | 19.09,8.13       | + |
| chr3 | 5505989 | 5506015 | CSAR_peak_ | 11.83            | + |
| chr3 | 5506341 | 5506477 | CSAR_peak_ | 6.57,11.06,20.83 | + |

|      |         |         |            |                   |   |
|------|---------|---------|------------|-------------------|---|
| chr3 | 5506545 | 5506604 | CSAR_peak_ | 8.9               | + |
| chr3 | 5506608 | 5506766 | CSAR_peak_ | 11.83,14.08       | + |
| chr3 | 5506895 | 5506935 | CSAR_peak_ | 6.02,6.95         | + |
| chr3 | 5509871 | 5509908 | CSAR_peak_ | 6.21              | + |
| chr3 | 5515445 | 5515596 | CSAR_peak_ | 7.27,16.08        | + |
| chr3 | 5540653 | 5540715 | CSAR_peak_ | 7.73              | + |
| chr3 | 5540843 | 5540912 | CSAR_peak_ | 6.21              | + |
| chr3 | 5541443 | 5541453 | CSAR_peak_ | 7.27              | + |
| chr3 | 5541464 | 5541534 | CSAR_peak_ | 7.58,8.9          | + |
| chr3 | 5545234 | 5545279 | CSAR_peak_ | 12.13             | + |
| chr3 | 5545375 | 5545387 | CSAR_peak_ | 7.27              | + |
| chr3 | 5546021 | 5546066 | CSAR_peak_ | 6.21              | + |
| chr3 | 5548330 | 5548412 | CSAR_peak_ | 6.03,9.77         | + |
| chr3 | 5549185 | 5549240 | CSAR_peak_ | 8.39,12.17        | + |
| chr3 | 5557128 | 5557172 | CSAR_peak_ | 7.27              | + |
| chr3 | 5557795 | 5557837 | CSAR_peak_ | 9.58              | + |
| chr3 | 5566464 | 5566594 | CSAR_peak_ | 10.83,7.27,11.83  | + |
| chr3 | 5566660 | 5566727 | CSAR_peak_ | 22.41,16.54       | + |
| chr3 | 5566834 | 5566862 | CSAR_peak_ | 7.26,10.83        | + |
| chr3 | 5566866 | 5566965 | CSAR_peak_ | 11.66             | + |
| chr3 | 5566983 | 5567130 | CSAR_peak_ | 8.28,11.28        | + |
| chr3 | 5567276 | 5567288 | CSAR_peak_ | 6.57              | + |
| chr3 | 5567365 | 5567472 | CSAR_peak_ | 12.61,8.39        | + |
| chr3 | 5567994 | 5568090 | CSAR_peak_ | 12.13             | + |
| chr3 | 5568112 | 5568133 | CSAR_peak_ | 6.02              | + |
| chr3 | 5568225 | 5568324 | CSAR_peak_ | 7.27              | + |
| chr3 | 5568338 | 5568379 | CSAR_peak_ | 6.21,6.45         | + |
| chr3 | 5568629 | 5568684 | CSAR_peak_ | 13.66             | + |
| chr3 | 5572863 | 5572942 | CSAR_peak_ | 15.28,10.62       | + |
| chr3 | 5574023 | 5574062 | CSAR_peak_ | 6.57              | + |
| chr3 | 5574141 | 5574162 | CSAR_peak_ | 6.02              | + |
| chr3 | 5579545 | 5579744 | CSAR_peak_ | 12.89,11.09,11.83 | + |
| chr3 | 5579902 | 5580013 | CSAR_peak_ | 8.52              | + |
| chr3 | 5580423 | 5580467 | CSAR_peak_ | 6.21              | + |
| chr3 | 5580556 | 5580633 | CSAR_peak_ | 8.65              | + |
| chr3 | 5580759 | 5580807 | CSAR_peak_ | 9.58,8.13         | + |
| chr3 | 5581847 | 5581887 | CSAR_peak_ | 7.92              | + |
| chr3 | 5582466 | 5582508 | CSAR_peak_ | 6.95              | + |
| chr3 | 5588590 | 5588666 | CSAR_peak_ | 10.92             | + |
| chr3 | 5588729 | 5588806 | CSAR_peak_ | 15,19.96,11.83    | + |
| chr3 | 5588964 | 5589047 | CSAR_peak_ | 16.19             | + |
| chr3 | 5589097 | 5589162 | CSAR_peak_ | 7.26              | + |

|      |         |         |            |                  |   |
|------|---------|---------|------------|------------------|---|
| chr3 | 5589253 | 5589323 | CSAR_peak_ | 16.92,8.61       | + |
| chr3 | 5589407 | 5589422 | CSAR_peak_ | 7.34             | + |
| chr3 | 5590287 | 5590338 | CSAR_peak_ | 8.39             | + |
| chr3 | 5592776 | 5592826 | CSAR_peak_ | 8.39,7.27        | + |
| chr3 | 5592885 | 5592931 | CSAR_peak_ | 6.57             | + |
| chr3 | 5592988 | 5593033 | CSAR_peak_ | 13.48            | + |
| chr3 | 5593246 | 5593382 | CSAR_peak_ | 6.94,7.34,9.9    | + |
| chr3 | 5593477 | 5593520 | CSAR_peak_ | 12.17            | + |
| chr3 | 5593562 | 5593760 | CSAR_peak_ | 18.71            | + |
| chr3 | 5593959 | 5594025 | CSAR_peak_ | 6.92,8.18        | + |
| chr3 | 5594033 | 5594102 | CSAR_peak_ | 10.58,7.78,11.1  | + |
| chr3 | 5594170 | 5594208 | CSAR_peak_ | 16.55            | + |
| chr3 | 5594213 | 5594309 | CSAR_peak_ | 8.28,6.12        | + |
| chr3 | 5594330 | 5594402 | CSAR_peak_ | 10.31            | + |
| chr3 | 5594582 | 5594661 | CSAR_peak_ | 22.79,17.28,11.1 | + |
| chr3 | 5594693 | 5594896 | CSAR_peak_ | 14.56,14.5       | + |
| chr3 | 5595157 | 5595189 | CSAR_peak_ | 8.9,7.31         | + |
| chr3 | 5595274 | 5595288 | CSAR_peak_ | 8.13             | + |
| chr3 | 5595305 | 5595349 | CSAR_peak_ | 7.73             | + |
| chr3 | 5706115 | 5706316 | CSAR_peak_ | 6.57,8.95,11.1   | + |
| chr3 | 5706591 | 5706670 | CSAR_peak_ | 10.83            | + |
| chr3 | 5706866 | 5706928 | CSAR_peak_ | 7.27             | + |
| chr3 | 5712127 | 5712202 | CSAR_peak_ | 6.21             | + |
| chr3 | 5712393 | 5712470 | CSAR_peak_ | 8.39,6.57        | + |
| chr3 | 5712806 | 5712877 | CSAR_peak_ | 7.58,6.91        | + |
| chr3 | 5713485 | 5713538 | CSAR_peak_ | 9.58             | + |
| chr3 | 5713958 | 5713988 | CSAR_peak_ | 7.27             | + |
| chr3 | 5714127 | 5714167 | CSAR_peak_ | 6.95             | + |
| chr3 | 5714927 | 5714994 | CSAR_peak_ | 17.37            | + |
| chr3 | 5715317 | 5715363 | CSAR_peak_ | 7.92,6.03        | + |
| chr3 | 5715856 | 5715923 | CSAR_peak_ | 8.7,7.27         | + |
| chr3 | 5716112 | 5716165 | CSAR_peak_ | 10.83            | + |
| chr3 | 5717022 | 5717112 | CSAR_peak_ | 7.92             | + |
| chr3 | 5717387 | 5717417 | CSAR_peak_ | 8.39             | + |
| chr3 | 5717751 | 5717779 | CSAR_peak_ | 8.39             | + |
| chr3 | 5718113 | 5718177 | CSAR_peak_ | 6.21,19.36       | + |
| chr3 | 5718447 | 5718472 | CSAR_peak_ | 8.39             | + |
| chr3 | 5718494 | 5718550 | CSAR_peak_ | 7.92,10.31       | + |
| chr3 | 5721256 | 5721354 | CSAR_peak_ | 17.52,5.71       | + |
| chr3 | 5721410 | 5721452 | CSAR_peak_ | 6.51             | + |
| chr3 | 5721493 | 5721552 | CSAR_peak_ | 18.65,17.51      | + |
| chr3 | 5721728 | 5721835 | CSAR_peak_ | 7.47,11.38,7.1   | + |

|      |         |         |            |              |   |
|------|---------|---------|------------|--------------|---|
| chr3 | 5722309 | 5722370 | CSAR_peak_ | 12.31        | + |
| chr3 | 5722381 | 5722450 | CSAR_peak_ | 6.21,8.65    | + |
| chr3 | 5722520 | 5722562 | CSAR_peak_ | 7.27         | + |
| chr3 | 5722579 | 5722654 | CSAR_peak_ | 6.53,8.3     | + |
| chr3 | 5722805 | 5722865 | CSAR_peak_ | 7.58,7.94    | + |
| chr3 | 5733122 | 5733167 | CSAR_peak_ | 8.39         | + |
| chr3 | 5733870 | 5733917 | CSAR_peak_ | 7.27         | + |
| chr3 | 5734227 | 5734272 | CSAR_peak_ | 8.28         | + |
| chr3 | 5734560 | 5734642 | CSAR_peak_ | 6.21         | + |
| chr3 | 5734950 | 5735014 | CSAR_peak_ | 10.95        | + |
| chr3 | 5735674 | 5735724 | CSAR_peak_ | 5.62         | + |
| chr3 | 5735883 | 5735931 | CSAR_peak_ | 7.27         | + |
| chr3 | 5736424 | 5736477 | CSAR_peak_ | 9.27         | + |
| chr3 | 5749838 | 5749896 | CSAR_peak_ | 7.27         | + |
| chr3 | 5756249 | 5756300 | CSAR_peak_ | 12.13        | + |
| chr3 | 5757157 | 5757251 | CSAR_peak_ | 12.94        | + |
| chr3 | 5757305 | 5757413 | CSAR_peak_ | 12.17,12.27  | + |
| chr3 | 5757547 | 5757620 | CSAR_peak_ | 12.5,8.39    | + |
| chr3 | 5758527 | 5758576 | CSAR_peak_ | 7.27         | + |
| chr3 | 5781925 | 5781941 | CSAR_peak_ | 6.21         | + |
| chr3 | 5781980 | 5782023 | CSAR_peak_ | 10.83        | + |
| chr3 | 5782801 | 5782841 | CSAR_peak_ | 6.21         | + |
| chr3 | 5782865 | 5782901 | CSAR_peak_ | 12.5         | + |
| chr3 | 5783023 | 5783089 | CSAR_peak_ | 12.13        | + |
| chr3 | 5783227 | 5783255 | CSAR_peak_ | 6.21         | + |
| chr3 | 5785320 | 5785396 | CSAR_peak_ | 10.02,8.95   | + |
| chr3 | 5785583 | 5785655 | CSAR_peak_ | 6.95,8.65    | + |
| chr3 | 5785789 | 5785845 | CSAR_peak_ | 8.39         | + |
| chr3 | 5814808 | 5814873 | CSAR_peak_ | 6.57         | + |
| chr3 | 5814988 | 5815050 | CSAR_peak_ | 10.95        | + |
| chr3 | 5815074 | 5815382 | CSAR_peak_ | 20.43,11.14, | + |
| chr3 | 5816085 | 5816207 | CSAR_peak_ | 17.51        | + |
| chr3 | 5816209 | 5816336 | CSAR_peak_ | 20.43,10.02  | + |
| chr3 | 5831845 | 5831923 | CSAR_peak_ | 7.27         | + |
| chr3 | 5842706 | 5842764 | CSAR_peak_ | 7.92         | + |
| chr3 | 5877780 | 5877883 | CSAR_peak_ | 8.39         | + |
| chr3 | 5878498 | 5878574 | CSAR_peak_ | 11.66        | + |
| chr3 | 5880317 | 5880385 | CSAR_peak_ | 8.39         | + |
| chr3 | 5956652 | 5956681 | CSAR_peak_ | 7.27         | + |
| chr3 | 6034941 | 6035035 | CSAR_peak_ | 9.77         | + |
| chr3 | 6035509 | 6035563 | CSAR_peak_ | 10.83        | + |
| chr3 | 6036435 | 6036507 | CSAR_peak_ | 10.83        | + |



|      |         |         |            |              |   |
|------|---------|---------|------------|--------------|---|
| chr3 | 6036856 | 6036912 | CSAR_peak_ | 6.21         | + |
| chr3 | 6037167 | 6037271 | CSAR_peak_ | 7.27,7.27    | + |
| chr3 | 6037341 | 6037421 | CSAR_peak_ | 9.77,7.92    | + |
| chr3 | 6037444 | 6037477 | CSAR_peak_ | 8.95         | + |
| chr3 | 6037537 | 6037574 | CSAR_peak_ | 9.27         | + |
| chr3 | 6037845 | 6037929 | CSAR_peak_ | 30.16,12.17  | + |
| chr3 | 6037963 | 6038050 | CSAR_peak_ | 27.11,7.47   | + |
| chr3 | 6038063 | 6038099 | CSAR_peak_ | 6.02         | + |
| chr3 | 6038559 | 6038647 | CSAR_peak_ | 9.77,10.95   | + |
| chr3 | 6038669 | 6038712 | CSAR_peak_ | 10.83        | + |
| chr3 | 6038844 | 6039007 | CSAR_peak_ | 11.38,8.39   | + |
| chr3 | 6095497 | 6095513 | CSAR_peak_ | 7.27         | + |
| chr3 | 6095521 | 6095569 | CSAR_peak_ | 10.83        | + |
| chr3 | 6095800 | 6095824 | CSAR_peak_ | 8.39         | + |
| chr3 | 6095905 | 6095970 | CSAR_peak_ | 10.83        | + |
| chr3 | 6096133 | 6096173 | CSAR_peak_ | 6.21         | + |
| chr3 | 6096236 | 6096276 | CSAR_peak_ | 6.44         | + |
| chr3 | 6098470 | 6098549 | CSAR_peak_ | 8.39         | + |
| chr3 | 6119923 | 6120052 | CSAR_peak_ | 6.21,7.27    | + |
| chr3 | 6120090 | 6120151 | CSAR_peak_ | 12.13,6.21   | + |
| chr3 | 6120592 | 6120668 | CSAR_peak_ | 6.21         | + |
| chr3 | 6121022 | 6121076 | CSAR_peak_ | 6.03,8.39    | + |
| chr3 | 6121926 | 6121961 | CSAR_peak_ | 6.03         | + |
| chr3 | 6122215 | 6122284 | CSAR_peak_ | 11.45        | + |
| chr3 | 6122452 | 6122501 | CSAR_peak_ | 9.58         | + |
| chr3 | 6123520 | 6123567 | CSAR_peak_ | 7.58         | + |
| chr3 | 6124009 | 6124078 | CSAR_peak_ | 12.31        | + |
| chr3 | 6124837 | 6124890 | CSAR_peak_ | 11.28,6.95   | + |
| chr3 | 6124976 | 6125100 | CSAR_peak_ | 10.83,14.85, | + |
| chr3 | 6138842 | 6138894 | CSAR_peak_ | 16.33        | + |
| chr3 | 6150417 | 6150497 | CSAR_peak_ | 16.33        | + |
| chr3 | 6176070 | 6176124 | CSAR_peak_ | 7.27         | + |
| chr3 | 6191787 | 6191827 | CSAR_peak_ | 9.58         | + |
| chr3 | 6191900 | 6191934 | CSAR_peak_ | 8.95         | + |
| chr3 | 6192546 | 6192703 | CSAR_peak_ | 13.51,12.17  | + |
| chr3 | 6201907 | 6201965 | CSAR_peak_ | 10.83        | + |
| chr3 | 6223230 | 6223286 | CSAR_peak_ | 6.21         | + |
| chr3 | 6224188 | 6224238 | CSAR_peak_ | 13.48,7.92   | + |
| chr3 | 6278392 | 6278472 | CSAR_peak_ | 6.95         | + |
| chr3 | 6278823 | 6278839 | CSAR_peak_ | 7.27         | + |
| chr3 | 6279899 | 6279953 | CSAR_peak_ | 8.39         | + |
| chr3 | 6281776 | 6281835 | CSAR_peak_ | 7.58         | + |

|      |         |         |            |                |   |
|------|---------|---------|------------|----------------|---|
| chr3 | 6316621 | 6316688 | CSAR_peak_ | 8.39,12.13     | + |
| chr3 | 6337490 | 6337538 | CSAR_peak_ | 8.39,7.27      | + |
| chr3 | 6353502 | 6353555 | CSAR_peak_ | 9.77           | + |
| chr3 | 6353672 | 6353730 | CSAR_peak_ | 10.95,6.95     | + |
| chr3 | 6354697 | 6354762 | CSAR_peak_ | 16.33          | + |
| chr3 | 6361592 | 6361634 | CSAR_peak_ | 7.27           | + |
| chr3 | 6361704 | 6361732 | CSAR_peak_ | 6.21           | + |
| chr3 | 6362985 | 6363030 | CSAR_peak_ | 13.48,6.21,5.  | + |
| chr3 | 6427708 | 6427743 | CSAR_peak_ | 6.03           | + |
| chr3 | 6428205 | 6428255 | CSAR_peak_ | 6.21           | + |
| chr3 | 6475075 | 6475120 | CSAR_peak_ | 12.13          | + |
| chr3 | 6475286 | 6475408 | CSAR_peak_ | 11.99,13.32    | + |
| chr3 | 6475410 | 6475569 | CSAR_peak_ | 9.72,15.68,1(+ |   |
| chr3 | 6475604 | 6475631 | CSAR_peak_ | 6.85           | + |
| chr3 | 6475935 | 6475989 | CSAR_peak_ | 12.17          | + |
| chr3 | 6476027 | 6476067 | CSAR_peak_ | 5.62           | + |
| chr3 | 6476747 | 6476811 | CSAR_peak_ | 12.13          | + |
| chr3 | 6477981 | 6478071 | CSAR_peak_ | 10.83          | + |
| chr3 | 6485801 | 6485850 | CSAR_peak_ | 10.62          | + |
| chr3 | 6485939 | 6486007 | CSAR_peak_ | 6.57           | + |
| chr3 | 6504729 | 6504786 | CSAR_peak_ | 6.21           | + |
| chr3 | 6514335 | 6514365 | CSAR_peak_ | 6.21           | + |
| chr3 | 6547490 | 6547517 | CSAR_peak_ | 6.57           | + |
| chr3 | 6606987 | 6607034 | CSAR_peak_ | 6.03,10.83     | + |
| chr3 | 6607856 | 6607902 | CSAR_peak_ | 8.39           | + |
| chr3 | 6608407 | 6608437 | CSAR_peak_ | 7.34           | + |
| chr3 | 6641004 | 6641050 | CSAR_peak_ | 6.21,7.92      | + |
| chr3 | 6641110 | 6641148 | CSAR_peak_ | 6.21           | + |
| chr3 | 6641575 | 6641613 | CSAR_peak_ | 17.4,11.66     | + |
| chr3 | 6641751 | 6641775 | CSAR_peak_ | 8.28,10.94     | + |
| chr3 | 6642428 | 6642471 | CSAR_peak_ | 8.39           | + |
| chr3 | 6645551 | 6645636 | CSAR_peak_ | 14.85          | + |
| chr3 | 6646652 | 6646712 | CSAR_peak_ | 7.92,16.54,6.  | + |
| chr3 | 6646774 | 6646830 | CSAR_peak_ | 8.95,6.95      | + |
| chr3 | 6646833 | 6646891 | CSAR_peak_ | 7.58           | + |
| chr3 | 6647610 | 6647669 | CSAR_peak_ | 17.82          | + |
| chr3 | 6647794 | 6647822 | CSAR_peak_ | 6.21           | + |
| chr3 | 6648202 | 6648271 | CSAR_peak_ | 19.36          | + |
| chr3 | 6664264 | 6664334 | CSAR_peak_ | 7.27,6.78      | + |
| chr3 | 6664619 | 6665280 | CSAR_peak_ | 12.31,8.18,1:  | + |
| chr3 | 6665312 | 6665600 | CSAR_peak_ | 18.33,17.37    | + |
| chr3 | 6665697 | 6665889 | CSAR_peak_ | 10.52,10.7,1:  | + |

|      |         |         |            |               |   |
|------|---------|---------|------------|---------------|---|
| chr3 | 6665904 | 6665968 | CSAR_peak_ | 9.61          | + |
| chr3 | 6665974 | 6666039 | CSAR_peak_ | 14.88         | + |
| chr3 | 6666085 | 6666151 | CSAR_peak_ | 7.58,7.27,19. | + |
| chr3 | 6666186 | 6666222 | CSAR_peak_ | 7.68          | + |
| chr3 | 6666261 | 6666321 | CSAR_peak_ | 6.21,7.27     | + |
| chr3 | 6667404 | 6667470 | CSAR_peak_ | 16.33,7.27    | + |
| chr3 | 6667478 | 6667701 | CSAR_peak_ | 6.57,8.28,11. | + |
| chr3 | 6667762 | 6667819 | CSAR_peak_ | 7.27          | + |
| chr3 | 6667905 | 6667971 | CSAR_peak_ | 7.06,6.03     | + |
| chr3 | 6688297 | 6688369 | CSAR_peak_ | 10.83,6.57,7. | + |
| chr3 | 6688447 | 6688540 | CSAR_peak_ | 6.21,6.21     | + |
| chr3 | 6688957 | 6689075 | CSAR_peak_ | 7.58,13.92,1. | + |
| chr3 | 6689262 | 6689334 | CSAR_peak_ | 17.37,8.13    | + |
| chr3 | 6689423 | 6689459 | CSAR_peak_ | 11.14,10.31   | + |
| chr3 | 6689707 | 6689743 | CSAR_peak_ | 8.19,7.34     | + |
| chr3 | 6689814 | 6689871 | CSAR_peak_ | 9.77          | + |
| chr3 | 6725903 | 6725964 | CSAR_peak_ | 6.21          | + |
| chr3 | 6731802 | 6731838 | CSAR_peak_ | 6.21          | + |
| chr3 | 6732291 | 6732357 | CSAR_peak_ | 6.21          | + |
| chr3 | 6780952 | 6780998 | CSAR_peak_ | 6.21          | + |
| chr3 | 6782007 | 6782042 | CSAR_peak_ | 6.21          | + |
| chr3 | 6841258 | 6841326 | CSAR_peak_ | 16.11         | + |
| chr3 | 6841614 | 6841686 | CSAR_peak_ | 6.21          | + |
| chr3 | 6841898 | 6841984 | CSAR_peak_ | 7.9,6.14      | + |
| chr3 | 6842002 | 6842052 | CSAR_peak_ | 10.83         | + |
| chr3 | 6864500 | 6864543 | CSAR_peak_ | 7.27          | + |
| chr3 | 6865037 | 6865095 | CSAR_peak_ | 8.95,6.21     | + |
| chr3 | 6867459 | 6867497 | CSAR_peak_ | 8.65,6.02     | + |
| chr3 | 6867560 | 6867595 | CSAR_peak_ | 6.45          | + |
| chr3 | 6868931 | 6869004 | CSAR_peak_ | 6.85          | + |
| chr3 | 6869474 | 6869528 | CSAR_peak_ | 8.39          | + |
| chr3 | 6869640 | 6869737 | CSAR_peak_ | 9.58,6.21     | + |
| chr3 | 6895940 | 6895989 | CSAR_peak_ | 5.62          | + |
| chr3 | 6904657 | 6904676 | CSAR_peak_ | 6.21          | + |
| chr3 | 6927104 | 6927141 | CSAR_peak_ | 6.03          | + |
| chr3 | 6928478 | 6928569 | CSAR_peak_ | 6.21          | + |
| chr3 | 6935041 | 6935099 | CSAR_peak_ | 8.39          | + |
| chr3 | 6935553 | 6935607 | CSAR_peak_ | 11.14,10.83   | + |
| chr3 | 6935813 | 6935938 | CSAR_peak_ | 12.13         | + |
| chr3 | 6950994 | 6951003 | CSAR_peak_ | 6.21          | + |
| chr3 | 6951250 | 6951296 | CSAR_peak_ | 6.03          | + |
| chr3 | 6951371 | 6951416 | CSAR_peak_ | 7.27          | + |

|      |         |         |            |                  |   |
|------|---------|---------|------------|------------------|---|
| chr3 | 6952976 | 6953014 | CSAR_peak_ | 6.21             | + |
| chr3 | 6960237 | 6960300 | CSAR_peak_ | 6.21,6.57        | + |
| chr3 | 6961182 | 6961241 | CSAR_peak_ | 14.88            | + |
| chr3 | 6962928 | 6962985 | CSAR_peak_ | 10.83            | + |
| chr3 | 6963464 | 6963494 | CSAR_peak_ | 7.27             | + |
| chr3 | 6963662 | 6963700 | CSAR_peak_ | 6.21             | + |
| chr3 | 6963814 | 6963847 | CSAR_peak_ | 6.21             | + |
| chr3 | 6964275 | 6964302 | CSAR_peak_ | 7.27             | + |
| chr3 | 6964694 | 6964746 | CSAR_peak_ | 6.92             | + |
| chr3 | 6964753 | 6964767 | CSAR_peak_ | 8.39             | + |
| chr3 | 6966753 | 6966836 | CSAR_peak_ | 6.45             | + |
| chr3 | 6969508 | 6969522 | CSAR_peak_ | 7.27             | + |
| chr3 | 6970631 | 6970683 | CSAR_peak_ | 6.21             | + |
| chr3 | 6973585 | 6973641 | CSAR_peak_ | 7.27             | + |
| chr3 | 6975661 | 6975724 | CSAR_peak_ | 9.58             | + |
| chr3 | 7088136 | 7088203 | CSAR_peak_ | 10.83            | + |
| chr3 | 7106914 | 7106959 | CSAR_peak_ | 6.57             | + |
| chr3 | 7116932 | 7117041 | CSAR_peak_ | 6.21             | + |
| chr3 | 7117952 | 7117993 | CSAR_peak_ | 7.27             | + |
| chr3 | 7118078 | 7118145 | CSAR_peak_ | 7.7              | + |
| chr3 | 7118549 | 7118602 | CSAR_peak_ | 7.58,8.95        | + |
| chr3 | 7157950 | 7158082 | CSAR_peak_ | 13.51,16.11      | + |
| chr3 | 7158412 | 7158467 | CSAR_peak_ | 7.27             | + |
| chr3 | 7158501 | 7158828 | CSAR_peak_ | 6.45,11.99,11.99 | + |
| chr3 | 7158863 | 7158964 | CSAR_peak_ | 9.68,10.96       | + |
| chr3 | 7158980 | 7159051 | CSAR_peak_ | 10.31            | + |
| chr3 | 7159134 | 7159244 | CSAR_peak_ | 24.33,18.35      | + |
| chr3 | 7159326 | 7159454 | CSAR_peak_ | 16.33,8.65,11.99 | + |
| chr3 | 7159556 | 7159629 | CSAR_peak_ | 12.6,15.96       | + |
| chr3 | 7159663 | 7159791 | CSAR_peak_ | 17.28,8.95,7.27  | + |
| chr3 | 7159951 | 7160242 | CSAR_peak_ | 13.48,7.58,6.21  | + |
| chr3 | 7160649 | 7160693 | CSAR_peak_ | 14.88            | + |
| chr3 | 7160714 | 7160744 | CSAR_peak_ | 8.39             | + |
| chr3 | 7160937 | 7161009 | CSAR_peak_ | 6.11             | + |
| chr3 | 7162011 | 7162079 | CSAR_peak_ | 11.14            | + |
| chr3 | 7162374 | 7162463 | CSAR_peak_ | 8.39,8.28        | + |
| chr3 | 7162665 | 7162705 | CSAR_peak_ | 7.27             | + |
| chr3 | 7162713 | 7162757 | CSAR_peak_ | 7.58             | + |
| chr3 | 7163230 | 7163277 | CSAR_peak_ | 6.95             | + |
| chr3 | 7163464 | 7163507 | CSAR_peak_ | 6.57             | + |
| chr3 | 7163711 | 7163823 | CSAR_peak_ | 10.83            | + |
| chr3 | 7164305 | 7164352 | CSAR_peak_ | 9.77,13.44       | + |

|      |         |         |            |                |   |
|------|---------|---------|------------|----------------|---|
| chr3 | 7164382 | 7164428 | CSAR_peak_ | 19.36,8.39     | + |
| chr3 | 7164943 | 7165170 | CSAR_peak_ | 6.64,9.77,9.2  | + |
| chr3 | 7165459 | 7165533 | CSAR_peak_ | 5.62,8.28      | + |
| chr3 | 7195291 | 7195330 | CSAR_peak_ | 6.21           | + |
| chr3 | 7242484 | 7242534 | CSAR_peak_ | 6.21,6.03      | + |
| chr3 | 7244864 | 7244909 | CSAR_peak_ | 6.21           | + |
| chr3 | 7245609 | 7245665 | CSAR_peak_ | 6.21           | + |
| chr3 | 7281728 | 7281805 | CSAR_peak_ | 9.58,10.83     | + |
| chr3 | 7446104 | 7446152 | CSAR_peak_ | 16.33          | + |
| chr3 | 7483587 | 7483634 | CSAR_peak_ | 5.62           | + |
| chr3 | 7491655 | 7491736 | CSAR_peak_ | 7.27           | + |
| chr3 | 7641666 | 7641711 | CSAR_peak_ | 9.03,10.94     | + |
| chr3 | 7649426 | 7649492 | CSAR_peak_ | 13.48          | + |
| chr3 | 7682361 | 7682367 | CSAR_peak_ | 14.11          | + |
| chr3 | 7682414 | 7682460 | CSAR_peak_ | 127.5,8.18,3(+ |   |
| chr3 | 7682508 | 7682599 | CSAR_peak_ | 33.72,116.22   | + |
| chr3 | 7682638 | 7682703 | CSAR_peak_ | 105.07,10.32   | + |
| chr3 | 7682744 | 7682753 | CSAR_peak_ | 9.08           | + |
| chr3 | 7682818 | 7682905 | CSAR_peak_ | 169.88,151.2   | + |
| chr3 | 7682908 | 7682947 | CSAR_peak_ | 8.16,77.89     | + |
| chr3 | 7835267 | 7835331 | CSAR_peak_ | 17.4,12.31     | + |
| chr3 | 7835742 | 7835843 | CSAR_peak_ | 13.48          | + |
| chr3 | 7835940 | 7835952 | CSAR_peak_ | 6.87           | + |
| chr3 | 7835970 | 7836014 | CSAR_peak_ | 8.5            | + |
| chr3 | 7836694 | 7836779 | CSAR_peak_ | 14.76,7.58     | + |
| chr3 | 7836869 | 7836902 | CSAR_peak_ | 6.95           | + |
| chr3 | 7838007 | 7838054 | CSAR_peak_ | 7.27,7.27      | + |
| chr3 | 7838370 | 7838477 | CSAR_peak_ | 13.48,6.72     | + |
| chr3 | 7838574 | 7838609 | CSAR_peak_ | 8.28           | + |
| chr3 | 7838786 | 7838803 | CSAR_peak_ | 6.95           | + |
| chr3 | 7872607 | 7872660 | CSAR_peak_ | 6.21           | + |
| chr3 | 7872753 | 7872798 | CSAR_peak_ | 8.39           | + |
| chr3 | 7913101 | 7913230 | CSAR_peak_ | 13.44,8.09     | + |
| chr3 | 7913233 | 7913281 | CSAR_peak_ | 25.33,8.58,1(+ |   |
| chr3 | 7913372 | 7913508 | CSAR_peak_ | 27.38,31.83    | + |
| chr3 | 7913852 | 7913931 | CSAR_peak_ | 18.95,10.62    | + |
| chr3 | 7914171 | 7914203 | CSAR_peak_ | 6.95,8.39      | + |
| chr3 | 7914272 | 7914365 | CSAR_peak_ | 12.93          | + |
| chr3 | 7914684 | 7914787 | CSAR_peak_ | 14.88,6.57     | + |
| chr3 | 7914861 | 7914968 | CSAR_peak_ | 20.2,13.3,7.3  | + |
| chr3 | 7914994 | 7915107 | CSAR_peak_ | 9.58,12.22,1(+ |   |
| chr3 | 7915139 | 7915293 | CSAR_peak_ | 21.39,21.59    | + |

|      |         |         |            |               |   |
|------|---------|---------|------------|---------------|---|
| chr3 | 7915421 | 7915473 | CSAR_peak_ | 6.53          | + |
| chr3 | 7915482 | 7915661 | CSAR_peak_ | 9.31,10.95    | + |
| chr3 | 7915894 | 7915951 | CSAR_peak_ | 13.44         | + |
| chr3 | 7918386 | 7918429 | CSAR_peak_ | 6.21          | + |
| chr3 | 7918459 | 7918524 | CSAR_peak_ | 11.38         | + |
| chr3 | 7918902 | 7918946 | CSAR_peak_ | 6.21          | + |
| chr3 | 7918984 | 7919055 | CSAR_peak_ | 13.48         | + |
| chr3 | 7919063 | 7919120 | CSAR_peak_ | 8.39          | + |
| chr3 | 7919402 | 7919464 | CSAR_peak_ | 13.48,9.58    | + |
| chr3 | 7956421 | 7956445 | CSAR_peak_ | 7.27,6.21     | + |
| chr3 | 7957250 | 7957270 | CSAR_peak_ | 6.21,8.39     | + |
| chr3 | 7960359 | 7960455 | CSAR_peak_ | 7.27          | + |
| chr3 | 7960478 | 7960527 | CSAR_peak_ | 7.27          | + |
| chr3 | 7960668 | 7960722 | CSAR_peak_ | 6.57          | + |
| chr3 | 7961462 | 7961522 | CSAR_peak_ | 6.21          | + |
| chr3 | 7964036 | 7964099 | CSAR_peak_ | 6.03,6.95     | + |
| chr3 | 7964182 | 7964227 | CSAR_peak_ | 5.62,6.02     | + |
| chr3 | 7964484 | 7964498 | CSAR_peak_ | 6.21          | + |
| chr3 | 7964521 | 7964555 | CSAR_peak_ | 6.94          | + |
| chr3 | 7964894 | 7964944 | CSAR_peak_ | 6.57          | + |
| chr3 | 8079533 | 8079584 | CSAR_peak_ | 8.39          | + |
| chr3 | 8079914 | 8079973 | CSAR_peak_ | 6.21          | + |
| chr3 | 8080216 | 8080350 | CSAR_peak_ | 13.66,9.43,1  | + |
| chr3 | 8080566 | 8080657 | CSAR_peak_ | 8.39          | + |
| chr3 | 8087831 | 8087904 | CSAR_peak_ | 10.83         | + |
| chr3 | 8088128 | 8088162 | CSAR_peak_ | 7.34          | + |
| chr3 | 8088171 | 8088231 | CSAR_peak_ | 6.57          | + |
| chr3 | 8089578 | 8089694 | CSAR_peak_ | 6.57          | + |
| chr3 | 8113060 | 8113110 | CSAR_peak_ | 6.57          | + |
| chr3 | 8113534 | 8113631 | CSAR_peak_ | 6.21,8.65,7.2 | + |
| chr3 | 8113941 | 8114007 | CSAR_peak_ | 7.7,12.17     | + |
| chr3 | 8114265 | 8114432 | CSAR_peak_ | 15.47,13.51,9 | + |
| chr3 | 8114589 | 8114642 | CSAR_peak_ | 6.21          | + |
| chr3 | 8114678 | 8114756 | CSAR_peak_ | 9.58          | + |
| chr3 | 8139585 | 8139655 | CSAR_peak_ | 8.39          | + |
| chr3 | 8140113 | 8140162 | CSAR_peak_ | 6.03          | + |
| chr3 | 8141034 | 8141106 | CSAR_peak_ | 11.14,9.58    | + |
| chr3 | 8142112 | 8142163 | CSAR_peak_ | 10.83         | + |
| chr3 | 8142414 | 8142500 | CSAR_peak_ | 13.92         | + |
| chr3 | 8142739 | 8142801 | CSAR_peak_ | 7.27,6.21     | + |
| chr3 | 8152833 | 8152895 | CSAR_peak_ | 6.21,7.27     | + |
| chr3 | 8153082 | 8153128 | CSAR_peak_ | 6.57          | + |

|      |         |         |            |               |   |
|------|---------|---------|------------|---------------|---|
| chr3 | 8153349 | 8153437 | CSAR_peak_ | 8.39          | + |
| chr3 | 8172826 | 8172883 | CSAR_peak_ | 16.33         | + |
| chr3 | 8194755 | 8194831 | CSAR_peak_ | 14.88,6.21    | + |
| chr3 | 8195584 | 8195607 | CSAR_peak_ | 8.39          | + |
| chr3 | 8195638 | 8195694 | CSAR_peak_ | 6.51          | + |
| chr3 | 8195730 | 8195868 | CSAR_peak_ | 16.33,10.31,  | + |
| chr3 | 8195894 | 8195984 | CSAR_peak_ | 13.92,6.72    | + |
| chr3 | 8196037 | 8196154 | CSAR_peak_ | 16.33,14.76   | + |
| chr3 | 8196162 | 8196203 | CSAR_peak_ | 13.03         | + |
| chr3 | 8196523 | 8196590 | CSAR_peak_ | 9.34,8.16,26. | + |
| chr3 | 8196676 | 8196685 | CSAR_peak_ | 13.05         | + |
| chr3 | 8196753 | 8196810 | CSAR_peak_ | 16.33         | + |
| chr3 | 8196865 | 8196897 | CSAR_peak_ | 6.21          | + |
| chr3 | 8309813 | 8309834 | CSAR_peak_ | 12.13         | + |
| chr3 | 8310030 | 8310103 | CSAR_peak_ | 10.18,6.95    | + |
| chr3 | 8310513 | 8310563 | CSAR_peak_ | 8.39          | + |
| chr3 | 8321637 | 8321689 | CSAR_peak_ | 10.95         | + |
| chr3 | 8322042 | 8322160 | CSAR_peak_ | 7.27,9.77,6.9 | + |
| chr3 | 8322759 | 8322805 | CSAR_peak_ | 6.21          | + |
| chr3 | 8322912 | 8323015 | CSAR_peak_ | 6.85          | + |
| chr3 | 8323588 | 8323638 | CSAR_peak_ | 7.73          | + |
| chr3 | 8334098 | 8334142 | CSAR_peak_ | 7.27          | + |
| chr3 | 8340967 | 8341013 | CSAR_peak_ | 8.39          | + |
| chr3 | 8342307 | 8342366 | CSAR_peak_ | 8.95          | + |
| chr3 | 8410554 | 8410687 | CSAR_peak_ | 8.52,6.95     | + |
| chr3 | 8410879 | 8410982 | CSAR_peak_ | 8.95,5.62     | + |
| chr3 | 8411125 | 8411203 | CSAR_peak_ | 17.37,7.68    | + |
| chr3 | 8411291 | 8411369 | CSAR_peak_ | 6.52          | + |
| chr3 | 8420853 | 8420906 | CSAR_peak_ | 6.21,6.57     | + |
| chr3 | 8422305 | 8422351 | CSAR_peak_ | 8.39          | + |
| chr3 | 8469315 | 8469371 | CSAR_peak_ | 6.21          | + |
| chr3 | 8470655 | 8470705 | CSAR_peak_ | 10.83         | + |
| chr3 | 8473885 | 8473925 | CSAR_peak_ | 6.21          | + |
| chr3 | 8474806 | 8474854 | CSAR_peak_ | 6.21          | + |
| chr3 | 8475504 | 8475548 | CSAR_peak_ | 10.02         | + |
| chr3 | 8475563 | 8475597 | CSAR_peak_ | 6.45          | + |
| chr3 | 8502669 | 8502690 | CSAR_peak_ | 6.21          | + |
| chr3 | 8503324 | 8503399 | CSAR_peak_ | 7.27          | + |
| chr3 | 8503867 | 8503920 | CSAR_peak_ | 7.92          | + |
| chr3 | 8504107 | 8504126 | CSAR_peak_ | 6.95          | + |
| chr3 | 8505293 | 8505392 | CSAR_peak_ | 7.27,6.87     | + |
| chr3 | 8505616 | 8505640 | CSAR_peak_ | 7.92          | + |

|      |         |         |            |                |   |
|------|---------|---------|------------|----------------|---|
| chr3 | 8506272 | 8506332 | CSAR_peak_ | 6.21           | + |
| chr3 | 8506927 | 8506979 | CSAR_peak_ | 5.62           | + |
| chr3 | 8507039 | 8507080 | CSAR_peak_ | 7.27           | + |
| chr3 | 8507291 | 8507299 | CSAR_peak_ | 8.39           | + |
| chr3 | 8507572 | 8507608 | CSAR_peak_ | 16.33          | + |
| chr3 | 8507627 | 8507724 | CSAR_peak_ | 7.27           | + |
| chr3 | 8508053 | 8508121 | CSAR_peak_ | 6.87,8.95      | + |
| chr3 | 8559348 | 8559398 | CSAR_peak_ | 8.39           | + |
| chr3 | 8560066 | 8560217 | CSAR_peak_ | 9.77           | + |
| chr3 | 8560230 | 8560256 | CSAR_peak_ | 5.62           | + |
| chr3 | 8560923 | 8560984 | CSAR_peak_ | 14.88          | + |
| chr3 | 8577114 | 8577158 | CSAR_peak_ | 7.92           | + |
| chr3 | 8577782 | 8577822 | CSAR_peak_ | 6.21           | + |
| chr3 | 8603626 | 8603690 | CSAR_peak_ | 12.5,9.58      | + |
| chr3 | 8603696 | 8603709 | CSAR_peak_ | 6.03           | + |
| chr3 | 8604591 | 8604631 | CSAR_peak_ | 12.13          | + |
| chr3 | 8604654 | 8604701 | CSAR_peak_ | 6.21           | + |
| chr3 | 8604758 | 8604835 | CSAR_peak_ | 7.58,7.27      | + |
| chr3 | 8604888 | 8605002 | CSAR_peak_ | 9.58,12.92     | + |
| chr3 | 8641949 | 8642076 | CSAR_peak_ | 8.18,7.29,6.2  | + |
| chr3 | 8642078 | 8642161 | CSAR_peak_ | 19.98,12.74    | + |
| chr3 | 8642264 | 8642317 | CSAR_peak_ | 13.6,9.32      | + |
| chr3 | 8642355 | 8642443 | CSAR_peak_ | 9.58,13.48     | + |
| chr3 | 8642455 | 8642538 | CSAR_peak_ | 11.14,17.35    | + |
| chr3 | 8642852 | 8642868 | CSAR_peak_ | 7.27           | + |
| chr3 | 8642894 | 8642968 | CSAR_peak_ | 7.58           | + |
| chr3 | 8642975 | 8643070 | CSAR_peak_ | 12.74,8.39     | + |
| chr3 | 8643159 | 8643212 | CSAR_peak_ | 14.08          | + |
| chr3 | 8643240 | 8643297 | CSAR_peak_ | 12.5,14.76     | + |
| chr3 | 8643326 | 8643432 | CSAR_peak_ | 8.95,6.21,8.6  | + |
| chr3 | 8643789 | 8643843 | CSAR_peak_ | 10.83          | + |
| chr3 | 8644081 | 8644137 | CSAR_peak_ | 9.25           | + |
| chr3 | 8686047 | 8686099 | CSAR_peak_ | 8.65           | + |
| chr3 | 8686730 | 8686810 | CSAR_peak_ | 9.77           | + |
| chr3 | 8687053 | 8687220 | CSAR_peak_ | 9.58,30.81,2(+ |   |
| chr3 | 8687256 | 8687305 | CSAR_peak_ | 7.58           | + |
| chr3 | 8703809 | 8703864 | CSAR_peak_ | 5.62           | + |
| chr3 | 8704060 | 8704101 | CSAR_peak_ | 6.21           | + |
| chr3 | 8726973 | 8727035 | CSAR_peak_ | 7.27,7.58      | + |
| chr3 | 8727547 | 8727613 | CSAR_peak_ | 11.14          | + |
| chr3 | 8727807 | 8727864 | CSAR_peak_ | 6.57,6.87      | + |
| chr3 | 8941417 | 8941429 | CSAR_peak_ | 7.58           | + |



|      |         |         |            |               |   |
|------|---------|---------|------------|---------------|---|
| chr3 | 8941466 | 8941842 | CSAR_peak_ | 25.22,14.76,1 | + |
| chr3 | 8941845 | 8942021 | CSAR_peak_ | 49.4,57.17    | + |
| chr3 | 8942022 | 8942186 | CSAR_peak_ | 10.95,8.98,10 | + |
| chr3 | 8942199 | 8942243 | CSAR_peak_ | 6.57          | + |
| chr3 | 8942329 | 8942341 | CSAR_peak_ | 6.44          | + |
| chr3 | 8942388 | 8942425 | CSAR_peak_ | 10.35         | + |
| chr3 | 8942635 | 8942705 | CSAR_peak_ | 13.51         | + |
| chr3 | 8960389 | 8960442 | CSAR_peak_ | 13.51         | + |
| chr3 | 8960725 | 8960805 | CSAR_peak_ | 16.33         | + |
| chr3 | 8961063 | 8961246 | CSAR_peak_ | 19.96,10.02,1 | + |
| chr3 | 8961519 | 8961555 | CSAR_peak_ | 7.2           | + |
| chr3 | 8961567 | 8961683 | CSAR_peak_ | 16.33,9.58,8  | + |
| chr3 | 8961714 | 8961779 | CSAR_peak_ | 19.36,13.66,1 | + |
| chr3 | 8961833 | 8961865 | CSAR_peak_ | 16.34,11.83   | + |
| chr3 | 8961947 | 8962179 | CSAR_peak_ | 17.68,16.33,1 | + |
| chr3 | 8962204 | 8962324 | CSAR_peak_ | 16.11,16.33,1 | + |
| chr3 | 8962372 | 8962635 | CSAR_peak_ | 19.76,17.68,1 | + |
| chr3 | 8962637 | 8962689 | CSAR_peak_ | 25.07,8.58    | + |
| chr3 | 8962698 | 8962787 | CSAR_peak_ | 9.77,7.34     | + |
| chr3 | 8962908 | 8963019 | CSAR_peak_ | 29,10.94,22   | + |
| chr3 | 8963060 | 8963179 | CSAR_peak_ | 9.44,9.41     | + |
| chr3 | 8963205 | 8963243 | CSAR_peak_ | 15.71         | + |
| chr3 | 8963246 | 8963297 | CSAR_peak_ | 7.95          | + |
| chr3 | 8963388 | 8963468 | CSAR_peak_ | 16.33,9.27    | + |
| chr3 | 8963642 | 8963710 | CSAR_peak_ | 6.95,7.27     | + |
| chr3 | 8963722 | 8963805 | CSAR_peak_ | 10.02,11.14   | + |
| chr3 | 8963925 | 8963989 | CSAR_peak_ | 6.57,12.27    | + |
| chr3 | 8964019 | 8964055 | CSAR_peak_ | 5.9           | + |
| chr3 | 8964070 | 8964287 | CSAR_peak_ | 21.56,16.33,1 | + |
| chr3 | 8964361 | 8964550 | CSAR_peak_ | 7.92,9.61,12  | + |
| chr3 | 8964555 | 8964672 | CSAR_peak_ | 23,6.87,17.8  | + |
| chr3 | 8964766 | 8964877 | CSAR_peak_ | 10.95,6.21,7  | + |
| chr3 | 8964891 | 8964914 | CSAR_peak_ | 6.03          | + |
| chr3 | 8964938 | 8965017 | CSAR_peak_ | 11.63,22.58,1 | + |
| chr3 | 8965071 | 8965208 | CSAR_peak_ | 21.56,6.21    | + |
| chr3 | 8965250 | 8965303 | CSAR_peak_ | 13.48         | + |
| chr3 | 8965544 | 8965603 | CSAR_peak_ | 11.38,9.77    | + |
| chr3 | 8965748 | 8965857 | CSAR_peak_ | 14.88,7.92    | + |
| chr3 | 8965889 | 8965995 | CSAR_peak_ | 11.66,18.95   | + |
| chr3 | 8966048 | 8966125 | CSAR_peak_ | 8.65,13.48    | + |
| chr3 | 8966225 | 8966396 | CSAR_peak_ | 17.82,7.58,1  | + |
| chr3 | 8966402 | 8966428 | CSAR_peak_ | 9.77          | + |

|      |         |         |            |               |   |
|------|---------|---------|------------|---------------|---|
| chr3 | 8966543 | 8966624 | CSAR_peak_ | 17.82,8.28    | + |
| chr3 | 8966660 | 8966710 | CSAR_peak_ | 6.21          | + |
| chr3 | 8966777 | 8966855 | CSAR_peak_ | 13.44         | + |
| chr3 | 8966955 | 8967007 | CSAR_peak_ | 8.39          | + |
| chr3 | 8967066 | 8967121 | CSAR_peak_ | 6.21,7.27     | + |
| chr3 | 8967170 | 8967249 | CSAR_peak_ | 6.95,5.62,10. | + |
| chr3 | 8967576 | 8967655 | CSAR_peak_ | 20.94,10.95   | + |
| chr3 | 8967833 | 8967914 | CSAR_peak_ | 6.44,10.83    | + |
| chr3 | 8967982 | 8968266 | CSAR_peak_ | 16.11,10.02,  | + |
| chr3 | 8968338 | 8968387 | CSAR_peak_ | 10.02         | + |
| chr3 | 8968538 | 8968612 | CSAR_peak_ | 9.97,6.21,5.6 | + |
| chr3 | 8969494 | 8969610 | CSAR_peak_ | 7.27,8.39     | + |
| chr3 | 9068959 | 9069006 | CSAR_peak_ | 8.95          | + |
| chr3 | 9105833 | 9105887 | CSAR_peak_ | 6.95          | + |
| chr3 | 9106445 | 9106500 | CSAR_peak_ | 7.27          | + |
| chr3 | 9106979 | 9107063 | CSAR_peak_ | 6.57,19.36    | + |
| chr3 | 9107888 | 9107952 | CSAR_peak_ | 8.39          | + |
| chr3 | 9107996 | 9108124 | CSAR_peak_ | 7.27          | + |
| chr3 | 9110863 | 9110949 | CSAR_peak_ | 9.58          | + |
| chr3 | 9111149 | 9111203 | CSAR_peak_ | 6.21          | + |
| chr3 | 9111570 | 9111667 | CSAR_peak_ | 8.39          | + |
| chr3 | 9112099 | 9112155 | CSAR_peak_ | 7.27,6.95     | + |
| chr3 | 9117682 | 9117744 | CSAR_peak_ | 9.58          | + |
| chr3 | 9155253 | 9155376 | CSAR_peak_ | 6.21,7.34     | + |
| chr3 | 9155495 | 9155609 | CSAR_peak_ | 7.73,20.43    | + |
| chr3 | 9155661 | 9155738 | CSAR_peak_ | 8.39          | + |
| chr3 | 9155741 | 9155856 | CSAR_peak_ | 9.77          | + |
| chr3 | 9156335 | 9156397 | CSAR_peak_ | 9.77,6.21     | + |
| chr3 | 9156568 | 9156622 | CSAR_peak_ | 13.48         | + |
| chr3 | 9247832 | 9247886 | CSAR_peak_ | 8.28          | + |
| chr3 | 9298120 | 9298157 | CSAR_peak_ | 6.03          | + |
| chr3 | 9307658 | 9307707 | CSAR_peak_ | 6.21          | + |
| chr3 | 9353903 | 9354002 | CSAR_peak_ | 10.83         | + |
| chr3 | 9354251 | 9354315 | CSAR_peak_ | 6.51,14.76,6. | + |
| chr3 | 9354528 | 9354588 | CSAR_peak_ | 18.85,11.14   | + |
| chr3 | 9354977 | 9355081 | CSAR_peak_ | 8.95          | + |
| chr3 | 9355223 | 9355259 | CSAR_peak_ | 7.27          | + |
| chr3 | 9355458 | 9355508 | CSAR_peak_ | 7.27          | + |
| chr3 | 9356779 | 9356818 | CSAR_peak_ | 6.95          | + |
| chr3 | 9357054 | 9357095 | CSAR_peak_ | 6.57          | + |
| chr3 | 9357170 | 9357282 | CSAR_peak_ | 6.57,13.48,6. | + |
| chr3 | 9396566 | 9396637 | CSAR_peak_ | 9.27          | + |

|      |         |         |            |               |   |
|------|---------|---------|------------|---------------|---|
| chr3 | 9396710 | 9396760 | CSAR_peak_ | 6.21          | + |
| chr3 | 9396861 | 9396945 | CSAR_peak_ | 8.39,16.34    | + |
| chr3 | 9396952 | 9397002 | CSAR_peak_ | 8.39          | + |
| chr3 | 9397232 | 9397259 | CSAR_peak_ | 7.27,6.57     | + |
| chr3 | 9398878 | 9398948 | CSAR_peak_ | 12.13         | + |
| chr3 | 9398990 | 9399041 | CSAR_peak_ | 6.95          | + |
| chr3 | 9407245 | 9407315 | CSAR_peak_ | 24.52,13.66   | + |
| chr3 | 9407431 | 9407483 | CSAR_peak_ | 7.58          | + |
| chr3 | 9407746 | 9407795 | CSAR_peak_ | 6.21          | + |
| chr3 | 9409522 | 9409609 | CSAR_peak_ | 16.33,6.57    | + |
| chr3 | 9409859 | 9409986 | CSAR_peak_ | 27.64,8.39    | + |
| chr3 | 9410326 | 9410379 | CSAR_peak_ | 12.13         | + |
| chr3 | 9439441 | 9439492 | CSAR_peak_ | 8.75,7.42,10. | + |
| chr3 | 9439617 | 9439634 | CSAR_peak_ | 7.13          | + |
| chr3 | 9440153 | 9440213 | CSAR_peak_ | 8.3           | + |
| chr3 | 9440236 | 9440302 | CSAR_peak_ | 6.95          | + |
| chr3 | 9440614 | 9440742 | CSAR_peak_ | 17.4,10.76,2. | + |
| chr3 | 9440866 | 9440925 | CSAR_peak_ | 7.27          | + |
| chr3 | 9441036 | 9441163 | CSAR_peak_ | 18.73,18.47,. | + |
| chr3 | 9441203 | 9441288 | CSAR_peak_ | 8.13          | + |
| chr3 | 9441560 | 9441612 | CSAR_peak_ | 10.65         | + |
| chr3 | 9441702 | 9441761 | CSAR_peak_ | 9.58,5.62     | + |
| chr3 | 9442756 | 9442810 | CSAR_peak_ | 7.27          | + |
| chr3 | 9447704 | 9447755 | CSAR_peak_ | 8.75,7.42,10. | + |
| chr3 | 9447880 | 9447897 | CSAR_peak_ | 7.13          | + |
| chr3 | 9448416 | 9448476 | CSAR_peak_ | 8.3           | + |
| chr3 | 9448499 | 9448565 | CSAR_peak_ | 6.95          | + |
| chr3 | 9448877 | 9449005 | CSAR_peak_ | 17.4,10.76,2. | + |
| chr3 | 9449129 | 9449188 | CSAR_peak_ | 7.27          | + |
| chr3 | 9449299 | 9449426 | CSAR_peak_ | 18.73,18.47,. | + |
| chr3 | 9449466 | 9449551 | CSAR_peak_ | 6.95          | + |
| chr3 | 9449823 | 9449875 | CSAR_peak_ | 10.65         | + |
| chr3 | 9449965 | 9450024 | CSAR_peak_ | 9.58,5.62     | + |
| chr3 | 9451019 | 9451073 | CSAR_peak_ | 7.27          | + |
| chr3 | 9519226 | 9519246 | CSAR_peak_ | 6.21          | + |
| chr3 | 9527998 | 9528037 | CSAR_peak_ | 11.45         | + |
| chr3 | 9529181 | 9529245 | CSAR_peak_ | 6.21,8.65     | + |
| chr3 | 9529301 | 9529500 | CSAR_peak_ | 12.31,10.18,. | + |
| chr3 | 9529640 | 9529683 | CSAR_peak_ | 8.52          | + |
| chr3 | 9529937 | 9530028 | CSAR_peak_ | 10.95,6.03,8. | + |
| chr3 | 9530047 | 9530069 | CSAR_peak_ | 6.21          | + |
| chr3 | 9530203 | 9530269 | CSAR_peak_ | 21.59,10.83,. | + |

|      |         |         |            |                  |   |
|------|---------|---------|------------|------------------|---|
| chr3 | 9531328 | 9531385 | CSAR_peak_ | 17.37            | + |
| chr3 | 9531652 | 9531708 | CSAR_peak_ | 9.77             | + |
| chr3 | 9531988 | 9532010 | CSAR_peak_ | 6.37             | + |
| chr3 | 9532042 | 9532059 | CSAR_peak_ | 7.58             | + |
| chr3 | 9537897 | 9537957 | CSAR_peak_ | 16.33,15.68      | + |
| chr3 | 9538047 | 9538111 | CSAR_peak_ | 9.41,9.27        | + |
| chr3 | 9538223 | 9538364 | CSAR_peak_ | 14.88,13.48,9.41 | + |
| chr3 | 9538615 | 9538727 | CSAR_peak_ | 6.8,7.36         | + |
| chr3 | 9538861 | 9538914 | CSAR_peak_ | 7.27,7.68,11.05  | + |
| chr3 | 9539460 | 9539515 | CSAR_peak_ | 8.13             | + |
| chr3 | 9539534 | 9539626 | CSAR_peak_ | 6.22             | + |
| chr3 | 9540067 | 9540148 | CSAR_peak_ | 16.33            | + |
| chr3 | 9540241 | 9540281 | CSAR_peak_ | 8.39             | + |
| chr3 | 9550676 | 9550798 | CSAR_peak_ | 90.23,84.99      | + |
| chr3 | 9550802 | 9550875 | CSAR_peak_ | 6.09,9.97        | + |
| chr3 | 9550960 | 9551016 | CSAR_peak_ | 51.05,48.32      | + |
| chr3 | 9667313 | 9667392 | CSAR_peak_ | 8.65             | + |
| chr3 | 9667606 | 9667762 | CSAR_peak_ | 10.95,7.29,6.03  | + |
| chr3 | 9671558 | 9671606 | CSAR_peak_ | 7.27,6.21        | + |
| chr3 | 9671983 | 9672063 | CSAR_peak_ | 10.95,6.57       | + |
| chr3 | 9672494 | 9672520 | CSAR_peak_ | 6.03             | + |
| chr3 | 9672759 | 9673019 | CSAR_peak_ | 37.9,17.88       | + |
| chr3 | 9673216 | 9673329 | CSAR_peak_ | 19.36,6.52       | + |
| chr3 | 9673331 | 9673425 | CSAR_peak_ | 13.48,5.62,8.65  | + |
| chr3 | 9673543 | 9673599 | CSAR_peak_ | 6.95             | + |
| chr3 | 9673617 | 9673670 | CSAR_peak_ | 8.65,7.27        | + |
| chr3 | 9674011 | 9674102 | CSAR_peak_ | 9.77,12.31       | + |
| chr3 | 9674256 | 9674306 | CSAR_peak_ | 6.21             | + |
| chr3 | 9674497 | 9674547 | CSAR_peak_ | 7.27             | + |
| chr3 | 9675562 | 9675597 | CSAR_peak_ | 6.21             | + |
| chr3 | 9675743 | 9675822 | CSAR_peak_ | 6.21             | + |
| chr3 | 9675824 | 9675905 | CSAR_peak_ | 6.21             | + |
| chr3 | 9677372 | 9677407 | CSAR_peak_ | 7.27             | + |
| chr3 | 9677767 | 9677823 | CSAR_peak_ | 7.27             | + |
| chr3 | 9678668 | 9678788 | CSAR_peak_ | 19.36,6.03       | + |
| chr3 | 9679066 | 9679120 | CSAR_peak_ | 7.58             | + |
| chr3 | 9679233 | 9679240 | CSAR_peak_ | 6.95             | + |
| chr3 | 9679598 | 9679620 | CSAR_peak_ | 7.27             | + |
| chr3 | 9686362 | 9686420 | CSAR_peak_ | 8.39             | + |
| chr3 | 9686516 | 9686552 | CSAR_peak_ | 6.57             | + |
| chr3 | 9686636 | 9686703 | CSAR_peak_ | 17.35            | + |
| chr3 | 9758983 | 9759026 | CSAR_peak_ | 8.65             | + |

|      |         |         |            |                |
|------|---------|---------|------------|----------------|
| chr3 | 9759182 | 9759417 | CSAR_peak_ | 16.11,6.95,7.+ |
| chr3 | 9759558 | 9759689 | CSAR_peak_ | 10.02,8.94,1.+ |
| chr3 | 9760148 | 9760247 | CSAR_peak_ | 12.17,6.21,7.+ |
| chr3 | 9796779 | 9796812 | CSAR_peak_ | 8.39 +         |
| chr3 | 9802929 | 9802951 | CSAR_peak_ | 7.27 +         |
| chr3 | 9803419 | 9803440 | CSAR_peak_ | 6.21 +         |
| chr3 | 9817446 | 9817494 | CSAR_peak_ | 6.95 +         |
| chr3 | 9818208 | 9818257 | CSAR_peak_ | 6.44 +         |
| chr3 | 9818569 | 9818604 | CSAR_peak_ | 7.27 +         |
| chr3 | 9820067 | 9820163 | CSAR_peak_ | 8.53 +         |
| chr3 | 9820296 | 9820322 | CSAR_peak_ | 7.26 +         |
| chr3 | 9820552 | 9820611 | CSAR_peak_ | 9.61 +         |
| chr3 | 9820906 | 9820972 | CSAR_peak_ | 6.64,6.87 +    |
| chr3 | 9821047 | 9821084 | CSAR_peak_ | 7.58 +         |
| chr3 | 9821247 | 9821360 | CSAR_peak_ | 9.58,13.84,1(+ |
| chr3 | 9821442 | 9821456 | CSAR_peak_ | 6.57 +         |
| chr3 | 9821747 | 9821788 | CSAR_peak_ | 8.39 +         |
| chr3 | 9821869 | 9821965 | CSAR_peak_ | 14.88 +        |
| chr3 | 9822677 | 9822729 | CSAR_peak_ | 6.94,13.44 +   |
| chr3 | 9822842 | 9822955 | CSAR_peak_ | 21.94,8.52 +   |
| chr3 | 9823699 | 9823746 | CSAR_peak_ | 8.65 +         |
| chr3 | 9824134 | 9824180 | CSAR_peak_ | 6.21 +         |
| chr3 | 9825225 | 9825255 | CSAR_peak_ | 7.27 +         |
| chr3 | 9825547 | 9825601 | CSAR_peak_ | 8.65,8.65,10.+ |
| chr3 | 9826461 | 9826508 | CSAR_peak_ | 14.76,9.27 +   |
| chr3 | 9827072 | 9827207 | CSAR_peak_ | 8.95,9.61,8.6+ |
| chr3 | 9827848 | 9827894 | CSAR_peak_ | 6.57,6.44 +    |
| chr3 | 9827987 | 9828065 | CSAR_peak_ | 17.37 +        |
| chr3 | 9828212 | 9828480 | CSAR_peak_ | 32.27,20.43,+  |
| chr3 | 9828547 | 9828605 | CSAR_peak_ | 25.34,6.95 +   |
| chr3 | 9870320 | 9870365 | CSAR_peak_ | 6.57 +         |
| chr3 | 9920651 | 9920704 | CSAR_peak_ | 8.39,6.21 +    |
| chr3 | 9989621 | 9989659 | CSAR_peak_ | 8.19,6.85 +    |
| chr3 | 9990001 | 9990141 | CSAR_peak_ | 8.28,8.65,10.+ |
| chr3 | 9990217 | 9990267 | CSAR_peak_ | 10.95 +        |
| chr3 | 9990290 | 9990370 | CSAR_peak_ | 16.33 +        |
| chr3 | 9990400 | 9990452 | CSAR_peak_ | 7.61,9.4 +     |
| chr3 | 9990460 | 9990485 | CSAR_peak_ | 7.27,7.27 +    |
| chr3 | 9990866 | 9990939 | CSAR_peak_ | 5.9,8.65 +     |
| chr3 | 9991025 | 9991061 | CSAR_peak_ | 8.28 +         |
| chr3 | 9991097 | 9991141 | CSAR_peak_ | 6.21 +         |
| chr3 | 9991285 | 9991470 | CSAR_peak_ | 12.13,13.44,+  |

|      |          |          |            |                |   |
|------|----------|----------|------------|----------------|---|
| chr3 | 9991501  | 9991558  | CSAR_peak_ | 7.34           | + |
| chr3 | 10017867 | 10017962 | CSAR_peak_ | 19.36,8.39     | + |
| chr3 | 10067738 | 10067794 | CSAR_peak_ | 12.13          | + |
| chr3 | 10067935 | 10068008 | CSAR_peak_ | 16.25,6.95     | + |
| chr3 | 10068344 | 10068409 | CSAR_peak_ | 12.13,16.11    | + |
| chr3 | 10068431 | 10068489 | CSAR_peak_ | 11.14          | + |
| chr3 | 10068632 | 10068692 | CSAR_peak_ | 9.58           | + |
| chr3 | 10069321 | 10069358 | CSAR_peak_ | 6.03           | + |
| chr3 | 10069590 | 10069644 | CSAR_peak_ | 18.35          | + |
| chr3 | 10069721 | 10069757 | CSAR_peak_ | 16.22          | + |
| chr3 | 10069859 | 10069922 | CSAR_peak_ | 7.58,8.3       | + |
| chr3 | 10070166 | 10070199 | CSAR_peak_ | 7.92           | + |
| chr3 | 10070300 | 10070377 | CSAR_peak_ | 10.02,8.13     | + |
| chr3 | 10070509 | 10070536 | CSAR_peak_ | 6.21           | + |
| chr3 | 10070685 | 10070727 | CSAR_peak_ | 13.51          | + |
| chr3 | 10070861 | 10070926 | CSAR_peak_ | 11.63,6.03     | + |
| chr3 | 10071075 | 10071117 | CSAR_peak_ | 6.57           | + |
| chr3 | 10071296 | 10071366 | CSAR_peak_ | 39.37,9.31     | + |
| chr3 | 10071509 | 10071552 | CSAR_peak_ | 5.67,8.99      | + |
| chr3 | 10071610 | 10071652 | CSAR_peak_ | 6.85,16.34,14  | + |
| chr3 | 10071849 | 10071888 | CSAR_peak_ | 6.44,16.19     | + |
| chr3 | 10072111 | 10072201 | CSAR_peak_ | 9.72           | + |
| chr3 | 10072242 | 10072323 | CSAR_peak_ | 10.95,14.76    | + |
| chr3 | 10098575 | 10098625 | CSAR_peak_ | 11.14          | + |
| chr3 | 10154776 | 10154821 | CSAR_peak_ | 10.83          | + |
| chr3 | 10164794 | 10164844 | CSAR_peak_ | 5.62           | + |
| chr3 | 10165835 | 10165881 | CSAR_peak_ | 8.39           | + |
| chr3 | 10205506 | 10205552 | CSAR_peak_ | 7.73           | + |
| chr3 | 10205779 | 10205788 | CSAR_peak_ | 6.03           | + |
| chr3 | 10206152 | 10206302 | CSAR_peak_ | 23.95,9.77,7.  | + |
| chr3 | 10206943 | 10207071 | CSAR_peak_ | 9.27           | + |
| chr3 | 10256018 | 10256171 | CSAR_peak_ | 16.92,6.21,2(+ | + |
| chr3 | 10256225 | 10256360 | CSAR_peak_ | 27.64,13       | + |
| chr3 | 10256383 | 10256480 | CSAR_peak_ | 8.99,7.06      | + |
| chr3 | 10256527 | 10256567 | CSAR_peak_ | 7.56           | + |
| chr3 | 10256688 | 10256812 | CSAR_peak_ | 9.72,10.45,6.  | + |
| chr3 | 10256892 | 10256956 | CSAR_peak_ | 26.26,17.37    | + |
| chr3 | 10257017 | 10257118 | CSAR_peak_ | 8.39,11.28,1:  | + |
| chr3 | 10258980 | 10259027 | CSAR_peak_ | 9.58           | + |
| chr3 | 10315337 | 10315369 | CSAR_peak_ | 10.83          | + |
| chr3 | 10315730 | 10315758 | CSAR_peak_ | 8.39           | + |
| chr3 | 10315951 | 10315989 | CSAR_peak_ | 6.21           | + |

|      |          |          |             |                 |   |
|------|----------|----------|-------------|-----------------|---|
| chr3 | 10316066 | 10316117 | CSAR_peak_4 | 6.87,8.9        | + |
| chr3 | 10316509 | 10316542 | CSAR_peak_3 | 6.03,6.57       | + |
| chr3 | 10316885 | 10316933 | CSAR_peak_3 | 7.27            | + |
| chr3 | 10319202 | 10319265 | CSAR_peak_3 | 7.27            | + |
| chr3 | 10328509 | 10328607 | CSAR_peak_3 | 95.56,38.25     | + |
| chr3 | 10328658 | 10328744 | CSAR_peak_3 | 124.73,11.77    | + |
| chr3 | 10328980 | 10329076 | CSAR_peak_3 | 27.17,15.51     | + |
| chr3 | 10329183 | 10329221 | CSAR_peak_3 | 9.62            | + |
| chr3 | 10444523 | 10444579 | CSAR_peak_3 | 7.27            | + |
| chr3 | 10621834 | 10621879 | CSAR_peak_3 | 7.58,6.03       | + |
| chr3 | 10668118 | 10668169 | CSAR_peak_4 | 7.27            | + |
| chr3 | 10757015 | 10757113 | CSAR_peak_4 | 9.58            | + |
| chr3 | 10779443 | 10779475 | CSAR_peak_4 | 7.27            | + |
| chr3 | 10786168 | 10786221 | CSAR_peak_3 | 5.62            | + |
| chr3 | 10787714 | 10787769 | CSAR_peak_3 | 7.58,8.95       | + |
| chr3 | 11033993 | 11034050 | CSAR_peak_3 | 12.13,7.27      | + |
| chr3 | 11034162 | 11034230 | CSAR_peak_3 | 8.13,6.21       | + |
| chr3 | 11099670 | 11099719 | CSAR_peak_3 | 8.39            | + |
| chr3 | 11154152 | 11154210 | CSAR_peak_4 | 6.42,41.34,11.1 | + |
| chr3 | 11154218 | 11154337 | CSAR_peak_3 | 19.53,74.28     | + |
| chr3 | 11192590 | 11192668 | CSAR_peak_3 | 9.25            | + |
| chr3 | 11253928 | 11253966 | CSAR_peak_4 | 8.39            | + |
| chr3 | 11255551 | 11255614 | CSAR_peak_3 | 9.58            | + |
| chr3 | 11256020 | 11256070 | CSAR_peak_4 | 9.77            | + |
| chr3 | 11290402 | 11290436 | CSAR_peak_3 | 6.21            | + |
| chr3 | 11290842 | 11290935 | CSAR_peak_3 | 9.27,7.73       | + |
| chr3 | 11291362 | 11291393 | CSAR_peak_4 | 8.39            | + |
| chr3 | 11291410 | 11291485 | CSAR_peak_3 | 10.18           | + |
| chr3 | 11291898 | 11291921 | CSAR_peak_4 | 7.27            | + |
| chr3 | 11291924 | 11291989 | CSAR_peak_3 | 8.3,17.35       | + |
| chr3 | 11292131 | 11292207 | CSAR_peak_3 | 8.53            | + |
| chr3 | 11294033 | 11294080 | CSAR_peak_3 | 6.44            | + |
| chr3 | 11294259 | 11294325 | CSAR_peak_4 | 12.13,9.77      | + |
| chr3 | 11974518 | 11974574 | CSAR_peak_3 | 10.31           | + |
| chr3 | 11976167 | 11976220 | CSAR_peak_3 | 6.21            | + |
| chr3 | 11976309 | 11976410 | CSAR_peak_3 | 6.57,6.95,10.   | + |
| chr3 | 13811977 | 13812030 | CSAR_peak_3 | 23,25.48        | + |
| chr3 | 13855014 | 13855067 | CSAR_peak_4 | 8.39            | + |
| chr3 | 13864287 | 13864340 | CSAR_peak_4 | 8.39            | + |
| chr3 | 14086271 | 14086319 | CSAR_peak_3 | 6.95            | + |
| chr3 | 14088413 | 14088427 | CSAR_peak_4 | 6.21            | + |
| chr3 | 14089312 | 14089318 | CSAR_peak_4 | 6.57            | + |

|      |          |          |             |               |   |
|------|----------|----------|-------------|---------------|---|
| chr3 | 14089346 | 14089368 | CSAR_peak_4 | 7.27          | + |
| chr3 | 14089376 | 14089430 | CSAR_peak_3 | 12.17         | + |
| chr3 | 14089871 | 14089874 | CSAR_peak_3 | 6.21          | + |
| chr3 | 14091330 | 14091397 | CSAR_peak_4 | 8.39,6.57     | + |
| chr3 | 14092844 | 14092868 | CSAR_peak_3 | 5.62          | + |
| chr3 | 14191988 | 14192067 | CSAR_peak_3 | 6.87,6.1      | + |
| chr3 | 14192869 | 14192885 | CSAR_peak_3 | 10.66,16.8    | + |
| chr3 | 14192945 | 14193023 | CSAR_peak_4 | 36.29,44.44   | + |
| chr3 | 14193052 | 14193087 | CSAR_peak_3 | 41.94         | + |
| chr3 | 14194652 | 14194731 | CSAR_peak_3 | 6.87,6.1      | + |
| chr3 | 14195806 | 14195833 | CSAR_peak_4 | 10.31         | + |
| chr3 | 14195899 | 14195948 | CSAR_peak_3 | 7.72,8.43     | + |
| chr3 | 14196044 | 14196087 | CSAR_peak_3 | 7.39          | + |
| chr3 | 14196409 | 14196482 | CSAR_peak_3 | 17.19,9.88    | + |
| chr3 | 14197198 | 14197293 | CSAR_peak_3 | 306.43,154.4  | + |
| chr3 | 14197344 | 14197569 | CSAR_peak_4 | 63.92,305.95  | + |
| chr3 | 14197634 | 14197677 | CSAR_peak_3 | 127.26,27.78  | + |
| chr3 | 14197732 | 14197759 | CSAR_peak_4 | 10.16,8.92    | + |
| chr3 | 14199343 | 14199421 | CSAR_peak_3 | 614.95,750.2  | + |
| chr3 | 14199480 | 14199530 | CSAR_peak_4 | 17.95,9.24    | + |
| chr3 | 14199566 | 14199609 | CSAR_peak_3 | 148.11,491.5  | + |
| chr3 | 14199656 | 14199706 | CSAR_peak_4 | 25.82,43.83,1 | + |
| chr3 | 14199716 | 14200012 | CSAR_peak_3 | 334.5,396.62  | + |
| chr3 | 14200070 | 14200595 | CSAR_peak_4 | 285.83,264.6  | + |
| chr3 | 14200649 | 14200996 | CSAR_peak_4 | 807.14,167.8  | + |
| chr3 | 14201034 | 14201118 | CSAR_peak_3 | 104.46,181.7  | + |
| chr3 | 14201204 | 14201322 | CSAR_peak_4 | 96.8,342.84,  | + |
| chr3 | 14201330 | 14201334 | CSAR_peak_3 | 12.77,10.78   | + |
| chr3 | 14201412 | 14201572 | CSAR_peak_3 | 578.31,643.1  | + |
| chr3 | 14201595 | 14201617 | CSAR_peak_3 | 21.91,37.29   | + |
| chr3 | 14201657 | 14201953 | CSAR_peak_4 | 442.98,1394.  | + |
| chr3 | 14201963 | 14202008 | CSAR_peak_4 | 33.14,44.7    | + |
| chr3 | 14202052 | 14202094 | CSAR_peak_3 | 349.73,479.3  | + |
| chr3 | 14202141 | 14202213 | CSAR_peak_3 | 1326.55,130   | + |
| chr3 | 14202267 | 14202280 | CSAR_peak_4 | 6.81,8.63     | + |
| chr3 | 14202442 | 14202528 | CSAR_peak_4 | 70.01,79.01,  | + |
| chr3 | 14202535 | 14202731 | CSAR_peak_4 | 111.91,146.5  | + |
| chr3 | 14202867 | 14202890 | CSAR_peak_3 | 38,20.67      | + |
| chr3 | 14203102 | 14203151 | CSAR_peak_3 | 25.42,21.16   | + |
| chr3 | 14203157 | 14203313 | CSAR_peak_4 | 52.77,127.45  | + |
| chr3 | 14203354 | 14203432 | CSAR_peak_4 | 36.29,44.44   | + |
| chr3 | 14203461 | 14203496 | CSAR_peak_3 | 41.94         | + |



|      |          |          |            |             |         |
|------|----------|----------|------------|-------------|---------|
| chr3 | 14205060 | 14205138 | CSAR_peak_ | 6.87,6.1    | +       |
| chr3 | 14724303 | 14724358 | CSAR_peak_ | 6.57,6.95   | +       |
| chr3 | 15168125 | 15168161 | CSAR_peak_ |             | 15.2 +  |
| chr3 | 15208597 | 15208637 | CSAR_peak_ |             | 6.21 +  |
| chr3 | 15432747 | 15432790 | CSAR_peak_ |             | 7.27 +  |
| chr3 | 15701477 | 15701527 | CSAR_peak_ |             | 8.65 +  |
| chr3 | 15906667 | 15906713 | CSAR_peak_ |             | 9.61 +  |
| chr3 | 15906777 | 15906858 | CSAR_peak_ |             | 8.28 +  |
| chr3 | 15908284 | 15908342 | CSAR_peak_ |             | 6.21 +  |
| chr3 | 15909023 | 15909075 | CSAR_peak_ | 6.03,5.62   | +       |
| chr3 | 15911280 | 15911323 | CSAR_peak_ |             | 7.27 +  |
| chr3 | 15988176 | 15988226 | CSAR_peak_ |             | 9.58 +  |
| chr3 | 15988567 | 15988601 | CSAR_peak_ |             | 6.21 +  |
| chr3 | 15988687 | 15988798 | CSAR_peak_ | 10.02,16.33 | +       |
| chr3 | 15988833 | 15988879 | CSAR_peak_ |             | 6.21 +  |
| chr3 | 15993646 | 15993703 | CSAR_peak_ |             | 8.95 +  |
| chr3 | 15995058 | 15995100 | CSAR_peak_ |             | 8.39 +  |
| chr3 | 16009546 | 16009603 | CSAR_peak_ | 7.27,6.45   | +       |
| chr3 | 16138716 | 16138779 | CSAR_peak_ | 6.21,7.27   | +       |
| chr3 | 16160337 | 16160430 | CSAR_peak_ | 5.62,6.03   | +       |
| chr3 | 16198247 | 16198288 | CSAR_peak_ |             | 6.21 +  |
| chr3 | 16198368 | 16198407 | CSAR_peak_ |             | 8.65 +  |
| chr3 | 16217997 | 16218068 | CSAR_peak_ | 9.27,6.44   | +       |
| chr3 | 16219270 | 16219320 | CSAR_peak_ | 22.56,8.28  | +       |
| chr3 | 16219657 | 16219706 | CSAR_peak_ |             | 6.21 +  |
| chr3 | 16221337 | 16221393 | CSAR_peak_ |             | 8.39 +  |
| chr3 | 16467581 | 16467632 | CSAR_peak_ |             | 6.57 +  |
| chr3 | 16468198 | 16468244 | CSAR_peak_ |             | 7.27 +  |
| chr3 | 16525582 | 16525643 | CSAR_peak_ |             | 8.39 +  |
| chr3 | 16525742 | 16525789 | CSAR_peak_ |             | 10.83 + |
| chr3 | 16526064 | 16526135 | CSAR_peak_ |             | 9.77 +  |
| chr3 | 16526150 | 16526233 | CSAR_peak_ | 9.27,6.64   | +       |
| chr3 | 16527018 | 16527068 | CSAR_peak_ |             | 6.21 +  |
| chr3 | 16527514 | 16527567 | CSAR_peak_ | 6.21,6.57   | +       |
| chr3 | 16528253 | 16528375 | CSAR_peak_ | 6.03,6.03   | +       |
| chr3 | 16528557 | 16528702 | CSAR_peak_ |             | 16.33 + |
| chr3 | 16756894 | 16756935 | CSAR_peak_ |             | 7.27 +  |
| chr3 | 16757475 | 16757515 | CSAR_peak_ |             | 7.27 +  |
| chr3 | 16757754 | 16757827 | CSAR_peak_ |             | 8.65 +  |
| chr3 | 16758160 | 16758225 | CSAR_peak_ | 19.36,9.79  | +       |
| chr3 | 16758307 | 16758344 | CSAR_peak_ |             | 17.37 + |
| chr3 | 16758380 | 16758524 | CSAR_peak_ | 12.17,7.58  | +       |

|      |          |          |             |               |   |
|------|----------|----------|-------------|---------------|---|
| chr3 | 16758619 | 16758669 | CSAR_peak_4 | 7.27          | + |
| chr3 | 16759311 | 16759353 | CSAR_peak_1 | 10.02         | + |
| chr3 | 16759502 | 16759545 | CSAR_peak_4 | 6.1           | + |
| chr3 | 16760394 | 16760423 | CSAR_peak_4 | 7.27          | + |
| chr3 | 16761040 | 16761188 | CSAR_peak_4 | 6.21,7.27     | + |
| chr3 | 16761380 | 16761419 | CSAR_peak_4 | 6.21          | + |
| chr3 | 16762239 | 16762302 | CSAR_peak_1 | 6.57          | + |
| chr3 | 16762399 | 16762497 | CSAR_peak_1 | 8.65,11.14    | + |
| chr3 | 16790159 | 16790267 | CSAR_peak_1 | 9.79,9.79     | + |
| chr3 | 16791023 | 16791084 | CSAR_peak_1 | 12.13         | + |
| chr3 | 16791716 | 16791755 | CSAR_peak_1 | 7.27          | + |
| chr3 | 16791759 | 16791815 | CSAR_peak_1 | 17.51         | + |
| chr3 | 16792004 | 16792048 | CSAR_peak_1 | 5.62          | + |
| chr3 | 16792392 | 16792488 | CSAR_peak_1 | 7.58,6.03,6.0 | + |
| chr3 | 16792547 | 16792635 | CSAR_peak_4 | 8.39,18.85,8. | + |
| chr3 | 16792895 | 16792923 | CSAR_peak_1 | 6.21          | + |
| chr3 | 16818922 | 16819032 | CSAR_peak_1 | 17.82,13      | + |
| chr3 | 16819046 | 16819143 | CSAR_peak_4 | 6.03,6.21     | + |
| chr3 | 16819806 | 16819883 | CSAR_peak_1 | 7.27,8.39     | + |
| chr3 | 16819962 | 16819980 | CSAR_peak_4 | 13.44         | + |
| chr3 | 16820291 | 16820345 | CSAR_peak_4 | 19.36,6.21    | + |
| chr3 | 16820609 | 16820673 | CSAR_peak_1 | 8.28          | + |
| chr3 | 16820822 | 16820841 | CSAR_peak_4 | 6.95          | + |
| chr3 | 16820882 | 16820930 | CSAR_peak_1 | 6.05          | + |
| chr3 | 16820957 | 16821026 | CSAR_peak_1 | 19.36,6.57    | + |
| chr3 | 16821282 | 16821389 | CSAR_peak_4 | 12.31,6.57    | + |
| chr3 | 16821458 | 16821522 | CSAR_peak_1 | 11.14         | + |
| chr3 | 16821673 | 16821755 | CSAR_peak_1 | 7.34,11.07,1  | + |
| chr3 | 16821825 | 16821893 | CSAR_peak_1 | 13.92         | + |
| chr3 | 16822117 | 16822156 | CSAR_peak_4 | 13.6,8.39     | + |
| chr3 | 16822249 | 16822334 | CSAR_peak_4 | 6.91,13.47    | + |
| chr3 | 16822412 | 16822454 | CSAR_peak_1 | 8.95          | + |
| chr3 | 16822607 | 16822709 | CSAR_peak_4 | 8.39,20.94,1  | + |
| chr3 | 16822942 | 16823049 | CSAR_peak_1 | 13.48,14.88,1 | + |
| chr3 | 16823146 | 16823177 | CSAR_peak_1 | 9.03          | + |
| chr3 | 16823220 | 16823275 | CSAR_peak_1 | 17.82,8.39    | + |
| chr3 | 16823411 | 16823439 | CSAR_peak_4 | 9.58          | + |
| chr3 | 16823637 | 16823755 | CSAR_peak_1 | 10.62         | + |
| chr3 | 16893293 | 16893330 | CSAR_peak_4 | 8.39,8.39     | + |
| chr3 | 16893414 | 16893434 | CSAR_peak_4 | 8.39          | + |
| chr3 | 16893649 | 16893713 | CSAR_peak_1 | 6.21          | + |
| chr3 | 16896403 | 16896491 | CSAR_peak_1 | 12.13,6.57    | + |

|      |          |          |            |               |   |
|------|----------|----------|------------|---------------|---|
| chr3 | 16896518 | 16896658 | CSAR_peak_ | 15.1,24.64    | + |
| chr3 | 16896659 | 16896754 | CSAR_peak_ | 23.49,21.37   | + |
| chr3 | 16896762 | 16896848 | CSAR_peak_ | 23.03,23.41   | + |
| chr3 | 16896870 | 16897016 | CSAR_peak_ | 8.61,15.3     | + |
| chr3 | 16897032 | 16897280 | CSAR_peak_ | 10.02,6.1,6.5 | + |
| chr3 | 16897299 | 16897422 | CSAR_peak_ | 11.99,7.27    | + |
| chr3 | 16897489 | 16897713 | CSAR_peak_ | 10.02,13.51,4 | + |
| chr3 | 16898038 | 16898070 | CSAR_peak_ | 8.39          | + |
| chr3 | 16919657 | 16919689 | CSAR_peak_ | 7.92,8.39     | + |
| chr3 | 17118843 | 17118896 | CSAR_peak_ | 14.88         | + |
| chr3 | 17119005 | 17119073 | CSAR_peak_ | 10.95,13.51   | + |
| chr3 | 17153685 | 17153722 | CSAR_peak_ | 7.27          | + |
| chr3 | 17153929 | 17153969 | CSAR_peak_ | 8.39          | + |
| chr3 | 17154132 | 17154183 | CSAR_peak_ | 6.21          | + |
| chr3 | 17154213 | 17154379 | CSAR_peak_ | 10.83,6.95,8. | + |
| chr3 | 17154883 | 17154933 | CSAR_peak_ | 8.39          | + |
| chr3 | 17155491 | 17155572 | CSAR_peak_ | 7.27,9.79     | + |
| chr3 | 17155639 | 17155703 | CSAR_peak_ | 12.31,6.45    | + |
| chr3 | 17155773 | 17155782 | CSAR_peak_ | 8.39          | + |
| chr3 | 17156643 | 17156691 | CSAR_peak_ | 6.21          | + |
| chr3 | 17183283 | 17183329 | CSAR_peak_ | 6.95          | + |
| chr3 | 17183566 | 17183637 | CSAR_peak_ | 10.17,9.35    | + |
| chr3 | 17183703 | 17183755 | CSAR_peak_ | 6.21          | + |
| chr3 | 17184954 | 17184995 | CSAR_peak_ | 6.21          | + |
| chr3 | 17229864 | 17229914 | CSAR_peak_ | 6.57          | + |
| chr3 | 17229916 | 17229935 | CSAR_peak_ | 6.21          | + |
| chr3 | 17230527 | 17230578 | CSAR_peak_ | 6.44          | + |
| chr3 | 17230808 | 17230862 | CSAR_peak_ | 6.57          | + |
| chr3 | 17286316 | 17286348 | CSAR_peak_ | 7.27          | + |
| chr3 | 17287267 | 17287386 | CSAR_peak_ | 9.77,12.13    | + |
| chr3 | 17287508 | 17287560 | CSAR_peak_ | 7.27          | + |
| chr3 | 17335568 | 17335632 | CSAR_peak_ | 12.13         | + |
| chr3 | 17445155 | 17445252 | CSAR_peak_ | 69.71,135.27  | + |
| chr3 | 17445291 | 17445331 | CSAR_peak_ | 65.12,56.74   | + |
| chr3 | 17445375 | 17445434 | CSAR_peak_ | 32.54,44.82   | + |
| chr3 | 17445498 | 17445532 | CSAR_peak_ | 6.55          | + |
| chr3 | 17445540 | 17445599 | CSAR_peak_ | 70.54,8.16,4  | + |
| chr3 | 17445630 | 17445655 | CSAR_peak_ | 47.57         | + |
| chr3 | 17445686 | 17445774 | CSAR_peak_ | 32.89,8.36,1  | + |
| chr3 | 17445803 | 17445890 | CSAR_peak_ | 41.86,15.85,  | + |
| chr3 | 17445962 | 17446053 | CSAR_peak_ | 22.34,62.08,  | + |
| chr3 | 17451779 | 17451833 | CSAR_peak_ | 6.57          | + |

|      |          |          |             |               |   |
|------|----------|----------|-------------|---------------|---|
| chr3 | 17452249 | 17452315 | CSAR_peak_4 | 10.83,8.39    | + |
| chr3 | 17462567 | 17462590 | CSAR_peak_4 | 7.27          | + |
| chr3 | 17511359 | 17511386 | CSAR_peak_4 | 6.21          | + |
| chr3 | 17523987 | 17524027 | CSAR_peak_3 | 8.39          | + |
| chr3 | 17524036 | 17524117 | CSAR_peak_4 | 6.94          | + |
| chr3 | 17524419 | 17524474 | CSAR_peak_3 | 7.27          | + |
| chr3 | 17524519 | 17524579 | CSAR_peak_3 | 7.92,10.31,6. | + |
| chr3 | 17524811 | 17524890 | CSAR_peak_3 | 6.21,7.34     | + |
| chr3 | 17525008 | 17525075 | CSAR_peak_4 | 7.58,9.61,9.6 | + |
| chr3 | 17525153 | 17525162 | CSAR_peak_3 | 10.83         | + |
| chr3 | 17559337 | 17559371 | CSAR_peak_4 | 6.21          | + |
| chr3 | 17559890 | 17559943 | CSAR_peak_4 | 8.39          | + |
| chr3 | 17572812 | 17572869 | CSAR_peak_3 | 6.21          | + |
| chr3 | 17573067 | 17573148 | CSAR_peak_3 | 10.83         | + |
| chr3 | 17635244 | 17635294 | CSAR_peak_4 | 8.39,7.92     | + |
| chr3 | 17635542 | 17635568 | CSAR_peak_4 | 10.95         | + |
| chr3 | 17635640 | 17635707 | CSAR_peak_3 | 8.39,15       | + |
| chr3 | 17636371 | 17636402 | CSAR_peak_3 | 7.58          | + |
| chr3 | 17636430 | 17636472 | CSAR_peak_3 | 6.21          | + |
| chr3 | 17636795 | 17636929 | CSAR_peak_4 | 16.33,10.83   | + |
| chr3 | 17645596 | 17645662 | CSAR_peak_3 | 5.62          | + |
| chr3 | 17645822 | 17645873 | CSAR_peak_3 | 10.02,5.62    | + |
| chr3 | 17750920 | 17750953 | CSAR_peak_4 | 8.39          | + |
| chr3 | 17751202 | 17751304 | CSAR_peak_4 | 8.39,9.58     | + |
| chr3 | 17752528 | 17752582 | CSAR_peak_3 | 8.39          | + |
| chr3 | 17763950 | 17764001 | CSAR_peak_3 | 6.02,16.11    | + |
| chr3 | 17764124 | 17764191 | CSAR_peak_3 | 8.65          | + |
| chr3 | 17764709 | 17764793 | CSAR_peak_3 | 6.21          | + |
| chr3 | 17764953 | 17764999 | CSAR_peak_3 | 7.34,7.7      | + |
| chr3 | 17765155 | 17765215 | CSAR_peak_4 | 7.27          | + |
| chr3 | 17765559 | 17765605 | CSAR_peak_3 | 8.95          | + |
| chr3 | 17765814 | 17765888 | CSAR_peak_3 | 24.21,7.06    | + |
| chr3 | 17767136 | 17767167 | CSAR_peak_3 | 6.03          | + |
| chr3 | 17767813 | 17767862 | CSAR_peak_3 | 6.21          | + |
| chr3 | 17768694 | 17768735 | CSAR_peak_3 | 13.44         | + |
| chr3 | 17768948 | 17768963 | CSAR_peak_3 | 8.65          | + |
| chr3 | 17769798 | 17769903 | CSAR_peak_3 | 6.57,9.58     | + |
| chr3 | 17772507 | 17772592 | CSAR_peak_3 | 8.65          | + |
| chr3 | 17778452 | 17778498 | CSAR_peak_3 | 6.44,8.52     | + |
| chr3 | 17779221 | 17779274 | CSAR_peak_4 | 8.13          | + |
| chr3 | 17804079 | 17804159 | CSAR_peak_3 | 6.57          | + |
| chr3 | 17808087 | 17808136 | CSAR_peak_4 | 6.57          | + |

|      |          |          |            |               |   |
|------|----------|----------|------------|---------------|---|
| chr3 | 17823433 | 17823482 | CSAR_peak_ | 8.39          | + |
| chr3 | 17826373 | 17826414 | CSAR_peak_ | 10.02         | + |
| chr3 | 17828032 | 17828081 | CSAR_peak_ | 7.92          | + |
| chr3 | 17919668 | 17919709 | CSAR_peak_ | 6.03          | + |
| chr3 | 17938586 | 17938709 | CSAR_peak_ | 7.27          | + |
| chr3 | 17987758 | 17987799 | CSAR_peak_ | 7.27          | + |
| chr3 | 17988146 | 17988228 | CSAR_peak_ | 18.95,13.48   | + |
| chr3 | 17988332 | 17988395 | CSAR_peak_ | 17.82         | + |
| chr3 | 17988476 | 17988589 | CSAR_peak_ | 6.21,10.02    | + |
| chr3 | 17988625 | 17988693 | CSAR_peak_ | 6.57,9.58,6.9 | + |
| chr3 | 17988822 | 17988938 | CSAR_peak_ | 13.48,6.87    | + |
| chr3 | 17989040 | 17989078 | CSAR_peak_ | 12.13         | + |
| chr3 | 17989292 | 17989343 | CSAR_peak_ | 13.48         | + |
| chr3 | 17989390 | 17989487 | CSAR_peak_ | 10.47         | + |
| chr3 | 17990246 | 17990301 | CSAR_peak_ | 6.21          | + |
| chr3 | 18074226 | 18074271 | CSAR_peak_ | 7.27          | + |
| chr3 | 18075911 | 18075949 | CSAR_peak_ | 6.21,6.21     | + |
| chr3 | 18077479 | 18077524 | CSAR_peak_ | 8.39          | + |
| chr3 | 18077670 | 18077713 | CSAR_peak_ | 6.44          | + |
| chr3 | 18089573 | 18089639 | CSAR_peak_ | 7.27          | + |
| chr3 | 18090209 | 18090261 | CSAR_peak_ | 6.21          | + |
| chr3 | 18090654 | 18090713 | CSAR_peak_ | 13.48         | + |
| chr3 | 18090740 | 18090770 | CSAR_peak_ | 8.39          | + |
| chr3 | 18090922 | 18090961 | CSAR_peak_ | 10.02         | + |
| chr3 | 18091026 | 18091084 | CSAR_peak_ | 7.27          | + |
| chr3 | 18091478 | 18091520 | CSAR_peak_ | 7.58          | + |
| chr3 | 18091610 | 18091618 | CSAR_peak_ | 6.57          | + |
| chr3 | 18092223 | 18092287 | CSAR_peak_ | 6.21          | + |
| chr3 | 18093847 | 18093896 | CSAR_peak_ | 6.57          | + |
| chr3 | 18118650 | 18118688 | CSAR_peak_ | 5.62,8.95     | + |
| chr3 | 18118816 | 18118858 | CSAR_peak_ | 14.85,15      | + |
| chr3 | 18118940 | 18118982 | CSAR_peak_ | 20.43         | + |
| chr3 | 18119573 | 18119588 | CSAR_peak_ | 6.03          | + |
| chr3 | 18119746 | 18119789 | CSAR_peak_ | 11.14         | + |
| chr3 | 18120303 | 18120352 | CSAR_peak_ | 6.57,6.95     | + |
| chr3 | 18121153 | 18121194 | CSAR_peak_ | 5.62          | + |
| chr3 | 18121475 | 18121548 | CSAR_peak_ | 7.58,10.83,1  | + |
| chr3 | 18207943 | 18208018 | CSAR_peak_ | 16.11,8.95    | + |
| chr3 | 18208785 | 18208861 | CSAR_peak_ | 8.39          | + |
| chr3 | 18208871 | 18208928 | CSAR_peak_ | 8.61          | + |
| chr3 | 18209335 | 18209381 | CSAR_peak_ | 6.21          | + |
| chr3 | 18209415 | 18209481 | CSAR_peak_ | 16.33         | + |

|      |          |          |             |               |   |
|------|----------|----------|-------------|---------------|---|
| chr3 | 18209892 | 18209902 | CSAR_peak_4 | 6.57          | + |
| chr3 | 18209924 | 18209977 | CSAR_peak_3 | 13.48,16.33   | + |
| chr3 | 18250622 | 18250658 | CSAR_peak_4 | 6.21          | + |
| chr3 | 18250689 | 18250802 | CSAR_peak_4 | 9.77,10.83,6. | + |
| chr3 | 18250955 | 18251012 | CSAR_peak_3 | 6.94          | + |
| chr3 | 18251052 | 18251073 | CSAR_peak_4 | 7.27          | + |
| chr3 | 18251720 | 18251779 | CSAR_peak_3 | 7.27          | + |
| chr3 | 18252705 | 18252756 | CSAR_peak_4 | 7.27,8.39     | + |
| chr3 | 18252964 | 18253019 | CSAR_peak_3 | 7.27          | + |
| chr3 | 18253224 | 18253277 | CSAR_peak_4 | 7.27          | + |
| chr3 | 18253462 | 18253540 | CSAR_peak_4 | 12.13         | + |
| chr3 | 18332874 | 18332913 | CSAR_peak_4 | 6.21          | + |
| chr3 | 18333251 | 18333377 | CSAR_peak_3 | 5.62,6.03     | + |
| chr3 | 18333472 | 18333519 | CSAR_peak_3 | 7.92          | + |
| chr3 | 18368288 | 18368343 | CSAR_peak_3 | 12.13         | + |
| chr3 | 18369332 | 18369360 | CSAR_peak_3 | 6.21          | + |
| chr3 | 18371028 | 18371144 | CSAR_peak_3 | 9.58,5.62     | + |
| chr3 | 18424448 | 18424533 | CSAR_peak_3 | 8.28          | + |
| chr3 | 18424995 | 18425047 | CSAR_peak_3 | 7.27,6.03     | + |
| chr3 | 18465834 | 18465867 | CSAR_peak_3 | 6.57          | + |
| chr3 | 18498307 | 18498357 | CSAR_peak_3 | 6.21          | + |
| chr3 | 18499993 | 18500038 | CSAR_peak_4 | 7.27          | + |
| chr3 | 18504601 | 18504639 | CSAR_peak_3 | 7.27          | + |
| chr3 | 18504672 | 18504735 | CSAR_peak_3 | 6.44          | + |
| chr3 | 18504822 | 18504881 | CSAR_peak_4 | 7.27          | + |
| chr3 | 18507385 | 18507440 | CSAR_peak_3 | 6.21          | + |
| chr3 | 18514460 | 18514501 | CSAR_peak_3 | 7.27          | + |
| chr3 | 18536055 | 18536121 | CSAR_peak_4 | 17.82         | + |
| chr3 | 18536202 | 18536254 | CSAR_peak_3 | 6.87,16.05    | + |
| chr3 | 18634686 | 18634725 | CSAR_peak_4 | 7.27          | + |
| chr3 | 18635165 | 18635225 | CSAR_peak_4 | 9.58          | + |
| chr3 | 18675009 | 18675017 | CSAR_peak_4 | 6.21          | + |
| chr3 | 18675244 | 18675287 | CSAR_peak_3 | 8.09          | + |
| chr3 | 18675298 | 18675347 | CSAR_peak_3 | 19.48         | + |
| chr3 | 18733443 | 18733486 | CSAR_peak_4 | 7.27          | + |
| chr3 | 18733867 | 18733929 | CSAR_peak_4 | 12.17         | + |
| chr3 | 18840744 | 18840821 | CSAR_peak_3 | 10.83         | + |
| chr3 | 18841380 | 18841462 | CSAR_peak_3 | 10.83,7.27    | + |
| chr3 | 18842740 | 18842878 | CSAR_peak_4 | 7.58,17.82    | + |
| chr3 | 18935982 | 18936028 | CSAR_peak_4 | 6.44          | + |
| chr3 | 18936139 | 18936261 | CSAR_peak_4 | 14.88         | + |
| chr3 | 18936263 | 18936367 | CSAR_peak_3 | 10.83         | + |

|      |          |          |             |               |   |
|------|----------|----------|-------------|---------------|---|
| chr3 | 18936447 | 18936645 | CSAR_peak_4 | 14.34,21.24   | + |
| chr3 | 18936741 | 18936886 | CSAR_peak_4 | 8.95,14.88,1! | + |
| chr3 | 18936898 | 18937071 | CSAR_peak_4 | 19.36,5.62,1! | + |
| chr3 | 18938444 | 18938682 | CSAR_peak_4 | 13.48,8.39,1! | + |
| chr3 | 18940800 | 18941411 | CSAR_peak_4 | 9.72,25.08,2! | + |
| chr3 | 18956153 | 18956186 | CSAR_peak_3 | 6.21          | + |
| chr3 | 18994234 | 18994286 | CSAR_peak_3 | 8.39          | + |
| chr3 | 19002494 | 19002554 | CSAR_peak_4 | 14.88,10.83   | + |
| chr3 | 19015855 | 19015908 | CSAR_peak_3 | 7.27          | + |
| chr3 | 19015931 | 19016045 | CSAR_peak_4 | 10.02,7.58,7. | + |
| chr3 | 19029115 | 19029184 | CSAR_peak_3 | 5.62,9.58,12. | + |
| chr3 | 19070302 | 19070361 | CSAR_peak_3 | 10.02         | + |
| chr3 | 19071551 | 19071655 | CSAR_peak_3 | 13.48         | + |
| chr3 | 19071725 | 19071806 | CSAR_peak_3 | 7.78          | + |
| chr3 | 19085024 | 19085082 | CSAR_peak_3 | 7.27,13.44    | + |
| chr3 | 19093976 | 19094014 | CSAR_peak_3 | 8.95          | + |
| chr3 | 19094842 | 19094882 | CSAR_peak_3 | 6.02          | + |
| chr3 | 19095138 | 19095188 | CSAR_peak_3 | 7.92          | + |
| chr3 | 19095319 | 19095354 | CSAR_peak_3 | 5.62          | + |
| chr3 | 19095918 | 19095954 | CSAR_peak_4 | 8.39          | + |
| chr3 | 19096039 | 19096084 | CSAR_peak_3 | 6.87          | + |
| chr3 | 19096874 | 19096916 | CSAR_peak_3 | 8.95          | + |
| chr3 | 19145823 | 19145865 | CSAR_peak_4 | 10.95         | + |
| chr3 | 19146624 | 19146680 | CSAR_peak_3 | 8.65          | + |
| chr3 | 19149522 | 19149565 | CSAR_peak_3 | 6.03          | + |
| chr3 | 19150010 | 19150094 | CSAR_peak_4 | 6.21,14.88    | + |
| chr3 | 19150306 | 19150422 | CSAR_peak_3 | 8.13,9.58     | + |
| chr3 | 19150508 | 19150542 | CSAR_peak_3 | 14.76         | + |
| chr3 | 19151743 | 19151813 | CSAR_peak_3 | 9.58          | + |
| chr3 | 19170442 | 19170487 | CSAR_peak_3 | 6.21          | + |
| chr3 | 19186846 | 19186864 | CSAR_peak_4 | 6.21          | + |
| chr3 | 19187114 | 19187195 | CSAR_peak_3 | 17.51,12.17   | + |
| chr3 | 19187368 | 19187440 | CSAR_peak_3 | 20.35,13.51   | + |
| chr3 | 19187543 | 19187582 | CSAR_peak_3 | 8.28          | + |
| chr3 | 19187696 | 19187754 | CSAR_peak_3 | 10.53,7.7     | + |
| chr3 | 19188050 | 19188132 | CSAR_peak_4 | 8.99,6.01,39. | + |
| chr3 | 19188265 | 19188331 | CSAR_peak_3 | 17.28         | + |
| chr3 | 19189327 | 19189405 | CSAR_peak_3 | 6.03          | + |
| chr3 | 19191407 | 19191465 | CSAR_peak_3 | 8.65          | + |
| chr3 | 19220697 | 19220805 | CSAR_peak_3 | 12.13         | + |
| chr3 | 19221114 | 19221148 | CSAR_peak_3 | 10.57         | + |
| chr3 | 19221260 | 19221317 | CSAR_peak_3 | 11.28,20.13   | + |

|      |          |          |            |                |   |
|------|----------|----------|------------|----------------|---|
| chr3 | 19221396 | 19221407 | CSAR_peak_ | 7.58           | + |
| chr3 | 19221568 | 19221631 | CSAR_peak_ | 12.17,7.27     | + |
| chr3 | 19221728 | 19221794 | CSAR_peak_ | 14.76          | + |
| chr3 | 19222184 | 19222262 | CSAR_peak_ | 9.58           | + |
| chr3 | 19223119 | 19223237 | CSAR_peak_ | 14.76,8.5      | + |
| chr3 | 19223600 | 19223685 | CSAR_peak_ | 6.03,7.27      | + |
| chr3 | 19223790 | 19223816 | CSAR_peak_ | 7.27           | + |
| chr3 | 19223860 | 19223890 | CSAR_peak_ | 6.21,6.87      | + |
| chr3 | 19233009 | 19233068 | CSAR_peak_ | 8.39           | + |
| chr3 | 19233180 | 19233217 | CSAR_peak_ | 7.27           | + |
| chr3 | 19233885 | 19233952 | CSAR_peak_ | 9.77           | + |
| chr3 | 19235377 | 19235433 | CSAR_peak_ | 9.77           | + |
| chr3 | 19244462 | 19244502 | CSAR_peak_ | 6.21           | + |
| chr3 | 19326536 | 19326642 | CSAR_peak_ | 8.39           | + |
| chr3 | 19326861 | 19326913 | CSAR_peak_ | 6.21           | + |
| chr3 | 19327396 | 19327448 | CSAR_peak_ | 7.27           | + |
| chr3 | 19328739 | 19328812 | CSAR_peak_ | 20.94,12.35,(+ |   |
| chr3 | 19329206 | 19329268 | CSAR_peak_ | 9.58,5.62      | + |
| chr3 | 19329334 | 19329371 | CSAR_peak_ | 6.21           | + |
| chr3 | 19329487 | 19329649 | CSAR_peak_ | 9.41,10.13,11  | + |
| chr3 | 19329736 | 19329794 | CSAR_peak_ | 9.77,8.65      | + |
| chr3 | 19330057 | 19330107 | CSAR_peak_ | 8.65           | + |
| chr3 | 19330123 | 19330234 | CSAR_peak_ | 9.58,8.39      | + |
| chr3 | 19330418 | 19330474 | CSAR_peak_ | 10.83          | + |
| chr3 | 19330798 | 19330842 | CSAR_peak_ | 7.58           | + |
| chr3 | 19332103 | 19332134 | CSAR_peak_ | 8.39           | + |
| chr3 | 19336567 | 19336603 | CSAR_peak_ | 6.21           | + |
| chr3 | 19338935 | 19338979 | CSAR_peak_ | 6.21           | + |
| chr3 | 19342539 | 19342582 | CSAR_peak_ | 6.03           | + |
| chr3 | 19342661 | 19342685 | CSAR_peak_ | 6.21           | + |
| chr3 | 19361937 | 19361987 | CSAR_peak_ | 14.88          | + |
| chr3 | 19362126 | 19362160 | CSAR_peak_ | 10.83          | + |
| chr3 | 19376613 | 19376653 | CSAR_peak_ | 7.27           | + |
| chr3 | 19380641 | 19380735 | CSAR_peak_ | 10.83,9.77     | + |
| chr3 | 19381337 | 19381375 | CSAR_peak_ | 6.21           | + |
| chr3 | 19381449 | 19381498 | CSAR_peak_ | 7.58           | + |
| chr3 | 19381539 | 19381587 | CSAR_peak_ | 6.21           | + |
| chr3 | 19381759 | 19381809 | CSAR_peak_ | 7.27           | + |
| chr3 | 19383000 | 19383046 | CSAR_peak_ | 9.58           | + |
| chr3 | 19383534 | 19383582 | CSAR_peak_ | 10.83          | + |
| chr3 | 19385197 | 19385245 | CSAR_peak_ | 6.21           | + |
| chr3 | 19397820 | 19397907 | CSAR_peak_ | 8.65           | + |



|      |          |          |             |                |   |
|------|----------|----------|-------------|----------------|---|
| chr3 | 19407586 | 19407630 | CSAR_peak_4 | 8.39           | + |
| chr3 | 19407712 | 19407751 | CSAR_peak_3 | 6.21           | + |
| chr3 | 19407883 | 19407968 | CSAR_peak_4 | 6.57,11.14     | + |
| chr3 | 19408567 | 19408594 | CSAR_peak_4 | 6.21           | + |
| chr3 | 19408817 | 19408876 | CSAR_peak_3 | 16.11,6.57     | + |
| chr3 | 19422601 | 19422644 | CSAR_peak_4 | 6.57           | + |
| chr3 | 19484963 | 19485013 | CSAR_peak_4 | 8.39           | + |
| chr3 | 19505886 | 19505927 | CSAR_peak_4 | 6.21           | + |
| chr3 | 19506257 | 19506329 | CSAR_peak_3 | 12.91,7.78     | + |
| chr3 | 19522587 | 19522642 | CSAR_peak_3 | 19.36          | + |
| chr3 | 19523257 | 19523366 | CSAR_peak_3 | 12.17          | + |
| chr3 | 19523867 | 19523958 | CSAR_peak_3 | 8.39           | + |
| chr3 | 19569772 | 19569809 | CSAR_peak_4 | 7.7            | + |
| chr3 | 19569837 | 19569929 | CSAR_peak_3 | 12.13          | + |
| chr3 | 19570043 | 19570100 | CSAR_peak_4 | 7.34           | + |
| chr3 | 19570162 | 19570427 | CSAR_peak_4 | 6.31,7.94,20.  | + |
| chr3 | 19570732 | 19570779 | CSAR_peak_3 | 6.21           | + |
| chr3 | 19581357 | 19581412 | CSAR_peak_4 | 7.27           | + |
| chr3 | 19581948 | 19581966 | CSAR_peak_4 | 8.39           | + |
| chr3 | 19582193 | 19582225 | CSAR_peak_4 | 8.39           | + |
| chr3 | 19582233 | 19582280 | CSAR_peak_3 | 10.66,6.85     | + |
| chr3 | 19582321 | 19582365 | CSAR_peak_4 | 13.48          | + |
| chr3 | 19582373 | 19582415 | CSAR_peak_3 | 6.36           | + |
| chr3 | 19583134 | 19583251 | CSAR_peak_4 | 13.66,8.92     | + |
| chr3 | 19583404 | 19583453 | CSAR_peak_4 | 8.39           | + |
| chr3 | 19583517 | 19583585 | CSAR_peak_4 | 18.95          | + |
| chr3 | 19583763 | 19583844 | CSAR_peak_3 | 13.44          | + |
| chr3 | 19584008 | 19584066 | CSAR_peak_4 | 8.09,9.8       | + |
| chr3 | 19584329 | 19584363 | CSAR_peak_3 | 11.06,7.73     | + |
| chr3 | 19584433 | 19584505 | CSAR_peak_4 | 17.51,10.83    | + |
| chr3 | 19584603 | 19584720 | CSAR_peak_4 | 7.58,6.85,17.  | + |
| chr3 | 19584997 | 19585124 | CSAR_peak_4 | 8.92,11.28,14. | + |
| chr3 | 19585250 | 19585282 | CSAR_peak_3 | 6.03           | + |
| chr3 | 19585697 | 19585893 | CSAR_peak_3 | 11.47,11.8,14. | + |
| chr3 | 19589351 | 19589429 | CSAR_peak_3 | 8.28,7.26,9.9  | + |
| chr3 | 19589726 | 19589806 | CSAR_peak_3 | 6.57           | + |
| chr3 | 19589980 | 19589999 | CSAR_peak_4 | 6.21           | + |
| chr3 | 19590692 | 19590742 | CSAR_peak_3 | 8.95           | + |
| chr3 | 19590865 | 19590900 | CSAR_peak_3 | 7.92,10.95     | + |
| chr3 | 19625650 | 19625706 | CSAR_peak_3 | 7.73           | + |
| chr3 | 19649245 | 19649343 | CSAR_peak_4 | 11.14,18.95    | + |
| chr3 | 19649435 | 19649491 | CSAR_peak_4 | 8.65           | + |

|      |          |          |             |                |   |
|------|----------|----------|-------------|----------------|---|
| chr3 | 19649523 | 19649533 | CSAR_peak_4 | 12.13          | + |
| chr3 | 19649601 | 19649737 | CSAR_peak_3 | 9.76,15.89     | + |
| chr3 | 19649888 | 19649945 | CSAR_peak_3 | 9.58           | + |
| chr3 | 19649948 | 19650010 | CSAR_peak_4 | 7.27           | + |
| chr3 | 19650040 | 19650107 | CSAR_peak_4 | 7.27           | + |
| chr3 | 19650308 | 19650362 | CSAR_peak_4 | 13.44          | + |
| chr3 | 19650430 | 19650500 | CSAR_peak_3 | 16.11          | + |
| chr3 | 19650526 | 19650557 | CSAR_peak_3 | 6.02           | + |
| chr3 | 19650871 | 19650963 | CSAR_peak_3 | 10.83,18.95    | + |
| chr3 | 19651093 | 19651110 | CSAR_peak_4 | 13.66          | + |
| chr3 | 19651126 | 19651178 | CSAR_peak_3 | 6.57,6.44      | + |
| chr3 | 19651498 | 19651555 | CSAR_peak_4 | 8.39           | + |
| chr3 | 19651710 | 19651787 | CSAR_peak_3 | 10.31,7.34     | + |
| chr3 | 19654779 | 19654845 | CSAR_peak_3 | 6.21           | + |
| chr3 | 19655551 | 19655647 | CSAR_peak_3 | 14.76          | + |
| chr3 | 19707943 | 19707988 | CSAR_peak_3 | 8.39           | + |
| chr3 | 19709527 | 19709641 | CSAR_peak_4 | 8.39,6.21      | + |
| chr3 | 19794847 | 19794885 | CSAR_peak_4 | 6.57           | + |
| chr3 | 19842755 | 19842811 | CSAR_peak_3 | 6.57,7.68      | + |
| chr3 | 19843325 | 19843357 | CSAR_peak_3 | 6.03           | + |
| chr3 | 19843926 | 19843994 | CSAR_peak_3 | 6.21           | + |
| chr3 | 19880744 | 19880793 | CSAR_peak_3 | 7.58           | + |
| chr3 | 19881489 | 19881510 | CSAR_peak_3 | 6.57           | + |
| chr3 | 19881595 | 19881627 | CSAR_peak_4 | 6.03           | + |
| chr3 | 19881917 | 19881977 | CSAR_peak_4 | 12.17,7.27     | + |
| chr3 | 19882011 | 19882123 | CSAR_peak_3 | 18.95,13.51    | + |
| chr3 | 19882464 | 19882510 | CSAR_peak_4 | 10.83          | + |
| chr3 | 19882760 | 19882796 | CSAR_peak_3 | 6.03           | + |
| chr3 | 19882940 | 19882981 | CSAR_peak_4 | 12.13,7.27     | + |
| chr3 | 19883057 | 19883095 | CSAR_peak_3 | 8.39,9.58      | + |
| chr3 | 19883273 | 19883323 | CSAR_peak_3 | 6.21,8.39      | + |
| chr3 | 19931385 | 19931497 | CSAR_peak_3 | 15.43,6.91     | + |
| chr3 | 19931886 | 19931937 | CSAR_peak_3 | 10.83          | + |
| chr3 | 19942853 | 19942895 | CSAR_peak_4 | 8.39           | + |
| chr3 | 19951544 | 19951577 | CSAR_peak_4 | 6.21           | + |
| chr3 | 19968291 | 19968344 | CSAR_peak_4 | 7.27           | + |
| chr3 | 19997135 | 19997274 | CSAR_peak_3 | 16.33,19.36    | + |
| chr3 | 19997309 | 19997354 | CSAR_peak_3 | 9.61           | + |
| chr3 | 19997357 | 19997417 | CSAR_peak_3 | 7.27           | + |
| chr3 | 19997717 | 19997825 | CSAR_peak_3 | 19.36,29.2,1(+ |   |
| chr3 | 19997937 | 19997985 | CSAR_peak_4 | 6.57           | + |
| chr3 | 19998032 | 19998081 | CSAR_peak_3 | 6.03           | + |

|      |          |          |            |               |   |
|------|----------|----------|------------|---------------|---|
| chr3 | 20001073 | 20001116 | CSAR_peak_ | 6.57          | + |
| chr3 | 20001426 | 20001454 | CSAR_peak_ | 6.02          | + |
| chr3 | 20001581 | 20001619 | CSAR_peak_ | 6.21          | + |
| chr3 | 20003141 | 20003199 | CSAR_peak_ | 6.21,6.21     | + |
| chr3 | 20005056 | 20005108 | CSAR_peak_ | 9.58          | + |
| chr3 | 20005982 | 20006019 | CSAR_peak_ | 9.03,7.58     | + |
| chr3 | 20006063 | 20006127 | CSAR_peak_ | 7.68          | + |
| chr3 | 20006151 | 20006232 | CSAR_peak_ | 13.44,9.77,8. | + |
| chr3 | 20006342 | 20006430 | CSAR_peak_ | 7.27          | + |
| chr3 | 20006589 | 20006640 | CSAR_peak_ | 6.21,6.95     | + |
| chr3 | 20006703 | 20006800 | CSAR_peak_ | 14.88         | + |
| chr3 | 20006804 | 20006910 | CSAR_peak_ | 14.88,7.73,9. | + |
| chr3 | 20006953 | 20006981 | CSAR_peak_ | 12.13         | + |
| chr3 | 20007042 | 20007157 | CSAR_peak_ | 7.58,12.13,9. | + |
| chr3 | 20007165 | 20007269 | CSAR_peak_ | 21.94,8.28,7. | + |
| chr3 | 20007299 | 20007412 | CSAR_peak_ | 6.64,6.1,7.68 | + |
| chr3 | 20007427 | 20007614 | CSAR_peak_ | 17.35,13.44,  | + |
| chr3 | 20007623 | 20007679 | CSAR_peak_ | 14.34         | + |
| chr3 | 20007744 | 20007956 | CSAR_peak_ | 9.25,8.95,8.3 | + |
| chr3 | 20007970 | 20008031 | CSAR_peak_ | 11.63,6.94    | + |
| chr3 | 20008063 | 20008152 | CSAR_peak_ | 12.13,6.45    | + |
| chr3 | 20008157 | 20008223 | CSAR_peak_ | 17.82         | + |
| chr3 | 20008427 | 20008441 | CSAR_peak_ | 6.57          | + |
| chr3 | 20008469 | 20008494 | CSAR_peak_ | 6.57          | + |
| chr3 | 20008563 | 20008579 | CSAR_peak_ | 9.58          | + |
| chr3 | 20008757 | 20008800 | CSAR_peak_ | 6.21          | + |
| chr3 | 20017533 | 20017581 | CSAR_peak_ | 6.57          | + |
| chr3 | 20057672 | 20057750 | CSAR_peak_ | 7.27,10.02,5. | + |
| chr3 | 20074707 | 20074855 | CSAR_peak_ | 8.39,11.14,7. | + |
| chr3 | 20074957 | 20075032 | CSAR_peak_ | 5.62          | + |
| chr3 | 20077612 | 20077658 | CSAR_peak_ | 9.58          | + |
| chr3 | 20079819 | 20079884 | CSAR_peak_ | 9.15          | + |
| chr3 | 20079954 | 20079978 | CSAR_peak_ | 6.64          | + |
| chr3 | 20095529 | 20095583 | CSAR_peak_ | 6.22          | + |
| chr3 | 20095808 | 20095874 | CSAR_peak_ | 13.48         | + |
| chr3 | 20190605 | 20190727 | CSAR_peak_ | 6.03,9.77     | + |
| chr3 | 20191192 | 20191252 | CSAR_peak_ | 6.44          | + |
| chr3 | 20191669 | 20191715 | CSAR_peak_ | 6.03          | + |
| chr3 | 20191754 | 20191806 | CSAR_peak_ | 7.27          | + |
| chr3 | 20191925 | 20191953 | CSAR_peak_ | 6.21          | + |
| chr3 | 20192440 | 20192514 | CSAR_peak_ | 8.65,9.77     | + |
| chr3 | 20236554 | 20236585 | CSAR_peak_ | 6.21          | + |

|      |          |          |            |                |   |
|------|----------|----------|------------|----------------|---|
| chr3 | 20236748 | 20236822 | CSAR_peak_ | 13.48,7.27     | + |
| chr3 | 20236886 | 20236928 | CSAR_peak_ | 8.39           | + |
| chr3 | 20239985 | 20240030 | CSAR_peak_ | 6.95           | + |
| chr3 | 20242233 | 20242298 | CSAR_peak_ | 8.65           | + |
| chr3 | 20298121 | 20298218 | CSAR_peak_ | 7.58,8.39      | + |
| chr3 | 20319654 | 20319695 | CSAR_peak_ | 7.92           | + |
| chr3 | 20320249 | 20320291 | CSAR_peak_ | 8.39           | + |
| chr3 | 20346234 | 20346302 | CSAR_peak_ | 7.34           | + |
| chr3 | 20346951 | 20347061 | CSAR_peak_ | 15,9.58        | + |
| chr3 | 20348255 | 20348356 | CSAR_peak_ | 5.62,6.03      | + |
| chr3 | 20490594 | 20490644 | CSAR_peak_ | 6.03,8.39      | + |
| chr3 | 20496739 | 20496815 | CSAR_peak_ | 7.92,8.95      | + |
| chr3 | 20497143 | 20497188 | CSAR_peak_ | 6.21           | + |
| chr3 | 20498799 | 20498844 | CSAR_peak_ | 6.21           | + |
| chr3 | 20498883 | 20498966 | CSAR_peak_ | 8.95,6.57      | + |
| chr3 | 20498993 | 20499029 | CSAR_peak_ | 6.57           | + |
| chr3 | 20499352 | 20499417 | CSAR_peak_ | 6.44           | + |
| chr3 | 20501084 | 20501121 | CSAR_peak_ | 8.39           | + |
| chr3 | 20501381 | 20501461 | CSAR_peak_ | 6.57,6.95      | + |
| chr3 | 20543747 | 20543791 | CSAR_peak_ | 6.21           | + |
| chr3 | 20553739 | 20553791 | CSAR_peak_ | 16.33          | + |
| chr3 | 20554212 | 20554251 | CSAR_peak_ | 6.57           | + |
| chr3 | 20555042 | 20555079 | CSAR_peak_ | 12.5           | + |
| chr3 | 20555162 | 20555208 | CSAR_peak_ | 7.34,6.32      | + |
| chr3 | 20555226 | 20555299 | CSAR_peak_ | 11.98          | + |
| chr3 | 20555554 | 20555579 | CSAR_peak_ | 6.57           | + |
| chr3 | 20555671 | 20555688 | CSAR_peak_ | 7.58           | + |
| chr3 | 20555702 | 20555755 | CSAR_peak_ | 5.97           | + |
| chr3 | 20555854 | 20555911 | CSAR_peak_ | 6.1            | + |
| chr3 | 20558894 | 20558925 | CSAR_peak_ | 7.27           | + |
| chr3 | 20559671 | 20559757 | CSAR_peak_ | 6.21,6.21      | + |
| chr3 | 20562592 | 20562649 | CSAR_peak_ | 8.95,8.65      | + |
| chr3 | 20564348 | 20564403 | CSAR_peak_ | 9.58           | + |
| chr3 | 20571518 | 20571554 | CSAR_peak_ | 43.31,17.91    | + |
| chr3 | 20571572 | 20571615 | CSAR_peak_ | 13.26,6.47     | + |
| chr3 | 20571640 | 20571721 | CSAR_peak_ | 14.22,10.48,(+ |   |
| chr3 | 20594827 | 20594885 | CSAR_peak_ | 7.92           | + |
| chr3 | 20612912 | 20612969 | CSAR_peak_ | 8.39,7.27      | + |
| chr3 | 20613128 | 20613176 | CSAR_peak_ | 12.13          | + |
| chr3 | 20613338 | 20613378 | CSAR_peak_ | 5.62           | + |
| chr3 | 20613449 | 20613513 | CSAR_peak_ | 8.65           | + |
| chr3 | 20613827 | 20613868 | CSAR_peak_ | 8.65           | + |

|      |          |          |             |               |   |
|------|----------|----------|-------------|---------------|---|
| chr3 | 20614230 | 20614274 | CSAR_peak_4 | 9.77          | + |
| chr3 | 20614979 | 20615043 | CSAR_peak_4 | 7.34          | + |
| chr3 | 20634870 | 20634909 | CSAR_peak_4 | 6.21          | + |
| chr3 | 20635567 | 20635605 | CSAR_peak_4 | 12.17         | + |
| chr3 | 20635854 | 20635905 | CSAR_peak_3 | 8.39          | + |
| chr3 | 20636113 | 20636167 | CSAR_peak_3 | 9.58          | + |
| chr3 | 20636728 | 20636780 | CSAR_peak_3 | 7.27          | + |
| chr3 | 20637728 | 20637748 | CSAR_peak_4 | 6.21          | + |
| chr3 | 20638421 | 20638436 | CSAR_peak_4 | 6.21          | + |
| chr3 | 20639048 | 20639089 | CSAR_peak_3 | 7.58          | + |
| chr3 | 20642170 | 20642255 | CSAR_peak_4 | 8.39,12.31    | + |
| chr3 | 20642858 | 20642924 | CSAR_peak_3 | 49.34,9.94,34 | + |
| chr3 | 20642928 | 20642990 | CSAR_peak_3 | 32.07,37.71   | + |
| chr3 | 20700762 | 20700895 | CSAR_peak_3 | 7.27,12.31,8. | + |
| chr3 | 20700994 | 20701046 | CSAR_peak_4 | 8.39          | + |
| chr3 | 20701254 | 20701311 | CSAR_peak_4 | 6.21          | + |
| chr3 | 20701860 | 20701905 | CSAR_peak_3 | 12.31,5.62    | + |
| chr3 | 20710069 | 20710136 | CSAR_peak_4 | 9.58          | + |
| chr3 | 20736968 | 20737016 | CSAR_peak_4 | 7.73,17.82    | + |
| chr3 | 20737253 | 20737469 | CSAR_peak_3 | 10.02,7.92,9. | + |
| chr3 | 20737492 | 20737585 | CSAR_peak_4 | 9.27,14.88    | + |
| chr3 | 20737824 | 20737864 | CSAR_peak_4 | 8.65          | + |
| chr3 | 20738051 | 20738124 | CSAR_peak_3 | 8.95          | + |
| chr3 | 20738305 | 20738434 | CSAR_peak_4 | 9.58          | + |
| chr3 | 20738537 | 20738597 | CSAR_peak_3 | 9.77,7.7,6.87 | + |
| chr3 | 20776745 | 20776795 | CSAR_peak_4 | 7.27          | + |
| chr3 | 20776816 | 20776966 | CSAR_peak_4 | 13.85,12.13   | + |
| chr3 | 20777195 | 20777416 | CSAR_peak_4 | 14.08,34.2,1. | + |
| chr3 | 20777420 | 20777467 | CSAR_peak_4 | 10.95         | + |
| chr3 | 20777507 | 20777594 | CSAR_peak_3 | 8.12          | + |
| chr3 | 20777913 | 20778032 | CSAR_peak_3 | 9.58,11.45    | + |
| chr3 | 20778062 | 20778115 | CSAR_peak_4 | 8.34          | + |
| chr3 | 20778243 | 20778283 | CSAR_peak_4 | 8.39          | + |
| chr3 | 20778305 | 20778346 | CSAR_peak_3 | 12.14         | + |
| chr3 | 20778348 | 20778402 | CSAR_peak_3 | 11.96,9.94    | + |
| chr3 | 20778421 | 20778572 | CSAR_peak_4 | 9.41,6.38,22. | + |
| chr3 | 20778573 | 20778617 | CSAR_peak_3 | 12.13         | + |
| chr3 | 20827873 | 20827949 | CSAR_peak_3 | 7.92,17.02,8. | + |
| chr3 | 20828651 | 20828720 | CSAR_peak_3 | 8.39          | + |
| chr3 | 20830216 | 20830269 | CSAR_peak_4 | 7.58          | + |
| chr3 | 20830696 | 20830792 | CSAR_peak_4 | 10.95,5.62    | + |
| chr3 | 20831581 | 20831633 | CSAR_peak_3 | 6.37          | + |

|      |          |          |              |                |   |
|------|----------|----------|--------------|----------------|---|
| chr3 | 20831880 | 20831936 | CSAR_peak_3  | 6.21           | + |
| chr3 | 20832349 | 20832403 | CSAR_peak_4  | 6.21           | + |
| chr3 | 20884857 | 20884901 | CSAR_peak_5  | 6.02           | + |
| chr3 | 20884994 | 20885009 | CSAR_peak_6  | 6.57           | + |
| chr3 | 20896792 | 20896921 | CSAR_peak_7  | 7.27,8.13,11.  | + |
| chr3 | 20896929 | 20896978 | CSAR_peak_8  | 10.83          | + |
| chr3 | 20896987 | 20897203 | CSAR_peak_9  | 34.53,23.83    | + |
| chr3 | 20897281 | 20897363 | CSAR_peak_10 | 9.77,8.39,6.2  | + |
| chr3 | 20897769 | 20897822 | CSAR_peak_11 | 12.13          | + |
| chr3 | 20985397 | 20985455 | CSAR_peak_12 | 6.45           | + |
| chr3 | 20992747 | 20992788 | CSAR_peak_13 | 7.27           | + |
| chr3 | 21004493 | 21004691 | CSAR_peak_14 | 16.08,187.83   | + |
| chr3 | 21011802 | 21011936 | CSAR_peak_15 | 6.95,8.65      | + |
| chr3 | 21011950 | 21012066 | CSAR_peak_16 | 13.66          | + |
| chr3 | 21012115 | 21012252 | CSAR_peak_17 | 13.48,11.14,(+ |   |
| chr3 | 21012410 | 21012462 | CSAR_peak_18 | 8.39           | + |
| chr3 | 21012846 | 21012921 | CSAR_peak_19 | 6.95,6.95,6.0  | + |
| chr3 | 21013129 | 21013209 | CSAR_peak_20 | 12.31,6.57     | + |
| chr3 | 21060032 | 21060146 | CSAR_peak_21 | 10.83,7.27     | + |
| chr3 | 21060501 | 21060673 | CSAR_peak_22 | 8.95,8.39      | + |
| chr3 | 21060697 | 21060756 | CSAR_peak_23 | 6.21           | + |
| chr3 | 21077038 | 21077091 | CSAR_peak_24 | 10.83,16.11,(+ |   |
| chr3 | 21077316 | 21077347 | CSAR_peak_25 | 7.27           | + |
| chr3 | 21077423 | 21077460 | CSAR_peak_26 | 9.77           | + |
| chr3 | 21077866 | 21077927 | CSAR_peak_27 | 6.21,7.27      | + |
| chr3 | 21078006 | 21078038 | CSAR_peak_28 | 7.27           | + |
| chr3 | 21110237 | 21110306 | CSAR_peak_29 | 6.21           | + |
| chr3 | 21129123 | 21129138 | CSAR_peak_30 | 5.62           | + |
| chr3 | 21129468 | 21129535 | CSAR_peak_31 | 7.58,7.58      | + |
| chr3 | 21175362 | 21175409 | CSAR_peak_32 | 6.21           | + |
| chr3 | 21178149 | 21178220 | CSAR_peak_33 | 12.17          | + |
| chr3 | 21178886 | 21178936 | CSAR_peak_34 | 10.83          | + |
| chr3 | 21179913 | 21179969 | CSAR_peak_35 | 6.57           | + |
| chr3 | 21180012 | 21180065 | CSAR_peak_36 | 8.65           | + |
| chr3 | 21180300 | 21180413 | CSAR_peak_37 | 9.58,7.92      | + |
| chr3 | 21180498 | 21180541 | CSAR_peak_38 | 6.21           | + |
| chr3 | 21199911 | 21199964 | CSAR_peak_39 | 6.95,7.92      | + |
| chr3 | 21200404 | 21200445 | CSAR_peak_40 | 7.58           | + |
| chr3 | 21200957 | 21201001 | CSAR_peak_41 | 8.65,6.21,7.2  | + |
| chr3 | 21201132 | 21201177 | CSAR_peak_42 | 6.12,7.27      | + |
| chr3 | 21203903 | 21203955 | CSAR_peak_43 | 7.27,7.26      | + |
| chr3 | 21204760 | 21204797 | CSAR_peak_44 | 6.57           | + |

|      |          |          |            |               |   |
|------|----------|----------|------------|---------------|---|
| chr3 | 21205698 | 21205789 | CSAR_peak_ | 6.21,7.27     | + |
| chr3 | 21206109 | 21206146 | CSAR_peak_ | 6.95          | + |
| chr3 | 21206456 | 21206503 | CSAR_peak_ | 6.21          | + |
| chr3 | 21207140 | 21207206 | CSAR_peak_ | 15.43         | + |
| chr3 | 21262021 | 21262077 | CSAR_peak_ | 6.95          | + |
| chr3 | 21308588 | 21308659 | CSAR_peak_ | 7.27          | + |
| chr3 | 21308953 | 21309028 | CSAR_peak_ | 10.95,10.95   | + |
| chr3 | 21309109 | 21309156 | CSAR_peak_ | 5.62          | + |
| chr3 | 21309204 | 21309326 | CSAR_peak_ | 12.17,6.21    | + |
| chr3 | 21315865 | 21315942 | CSAR_peak_ | 6.21          | + |
| chr3 | 21346741 | 21346939 | CSAR_peak_ | 15.82,155.53  | + |
| chr3 | 21350613 | 21350656 | CSAR_peak_ | 13.51,6.02,7. | + |
| chr3 | 21351225 | 21351309 | CSAR_peak_ | 12.13,6.03    | + |
| chr3 | 21394432 | 21394519 | CSAR_peak_ | 9.58          | + |
| chr3 | 21396909 | 21396964 | CSAR_peak_ | 7.68          | + |
| chr3 | 21396980 | 21397051 | CSAR_peak_ | 6.21          | + |
| chr3 | 21440994 | 21441048 | CSAR_peak_ | 7.58          | + |
| chr3 | 21441222 | 21441268 | CSAR_peak_ | 6.95          | + |
| chr3 | 21441310 | 21441352 | CSAR_peak_ | 6.44          | + |
| chr3 | 21441446 | 21441544 | CSAR_peak_ | 9.03          | + |
| chr3 | 21485841 | 21485898 | CSAR_peak_ | 7.92          | + |
| chr3 | 21494056 | 21494106 | CSAR_peak_ | 6.21          | + |
| chr3 | 21494372 | 21494421 | CSAR_peak_ | 6.95          | + |
| chr3 | 21559074 | 21559144 | CSAR_peak_ | 24.78         | + |
| chr3 | 21559261 | 21559324 | CSAR_peak_ | 65.45,6.41,2. | + |
| chr3 | 21642712 | 21642785 | CSAR_peak_ | 8.39,10.83    | + |
| chr3 | 21642961 | 21642984 | CSAR_peak_ | 9.58,6.57     | + |
| chr3 | 21643085 | 21643163 | CSAR_peak_ | 10.83,14.88   | + |
| chr3 | 21643323 | 21643373 | CSAR_peak_ | 10.02         | + |
| chr3 | 21646443 | 21646499 | CSAR_peak_ | 6.21          | + |
| chr3 | 21657312 | 21657365 | CSAR_peak_ | 5.62          | + |
| chr3 | 21672029 | 21672074 | CSAR_peak_ | 7.27          | + |
| chr3 | 21673162 | 21673200 | CSAR_peak_ | 6.03          | + |
| chr3 | 21682142 | 21682208 | CSAR_peak_ | 8.39          | + |
| chr3 | 21707304 | 21707509 | CSAR_peak_ | 16.21,8.84    | + |
| chr3 | 21707648 | 21707830 | CSAR_peak_ | 17.82,14.88,  | + |
| chr3 | 21707901 | 21708035 | CSAR_peak_ | 28.21,10.12,  | + |
| chr3 | 21708255 | 21708359 | CSAR_peak_ | 7.58,11.17    | + |
| chr3 | 21708364 | 21708402 | CSAR_peak_ | 5.62          | + |
| chr3 | 21708448 | 21708668 | CSAR_peak_ | 12.31,12.74,  | + |
| chr3 | 21708764 | 21708801 | CSAR_peak_ | 6.95          | + |
| chr3 | 21710324 | 21710379 | CSAR_peak_ | 10.95         | + |

|      |          |          |            |               |   |
|------|----------|----------|------------|---------------|---|
| chr3 | 21710419 | 21710480 | CSAR_peak_ | 12.6          | + |
| chr3 | 21710610 | 21710655 | CSAR_peak_ | 6.95          | + |
| chr3 | 21710993 | 21711047 | CSAR_peak_ | 6.21          | + |
| chr3 | 21711635 | 21711684 | CSAR_peak_ | 12.13         | + |
| chr3 | 21712339 | 21712393 | CSAR_peak_ | 6.03,6.03     | + |
| chr3 | 21715173 | 21715238 | CSAR_peak_ | 10.83,7.27    | + |
| chr3 | 21729055 | 21729110 | CSAR_peak_ | 14.88,10.02   | + |
| chr3 | 21729651 | 21729737 | CSAR_peak_ | 6.45          | + |
| chr3 | 21729816 | 21729846 | CSAR_peak_ | 8.39          | + |
| chr3 | 21729906 | 21729937 | CSAR_peak_ | 6.21          | + |
| chr3 | 21730287 | 21730327 | CSAR_peak_ | 8.39          | + |
| chr3 | 21730332 | 21730356 | CSAR_peak_ | 7.27          | + |
| chr3 | 21730426 | 21730476 | CSAR_peak_ | 5.62,11.14    | + |
| chr3 | 21730726 | 21730775 | CSAR_peak_ | 6.85          | + |
| chr3 | 21832370 | 21832606 | CSAR_peak_ | 143.22,31.21  | + |
| chr3 | 21843578 | 21843618 | CSAR_peak_ | 7.27          | + |
| chr3 | 21844183 | 21844232 | CSAR_peak_ | 8.39          | + |
| chr3 | 21890725 | 21890782 | CSAR_peak_ | 6.21          | + |
| chr3 | 21932564 | 21932649 | CSAR_peak_ | 11.07         | + |
| chr3 | 21932906 | 21932945 | CSAR_peak_ | 6.57          | + |
| chr3 | 21933037 | 21933081 | CSAR_peak_ | 6.37          | + |
| chr3 | 21933158 | 21933350 | CSAR_peak_ | 29.61,14.16   | + |
| chr3 | 21933384 | 21933418 | CSAR_peak_ | 9.04          | + |
| chr3 | 21933434 | 21933829 | CSAR_peak_ | 21.26,14.08   | + |
| chr3 | 21933841 | 21934358 | CSAR_peak_ | 10.31,13.85   | + |
| chr3 | 21934428 | 21934470 | CSAR_peak_ | 8.12,6.45     | + |
| chr3 | 21934475 | 21934650 | CSAR_peak_ | 7.27,17.02    | + |
| chr3 | 21934702 | 21934823 | CSAR_peak_ | 5.62,11.83    | + |
| chr3 | 21934936 | 21935018 | CSAR_peak_ | 8.13          | + |
| chr3 | 21935046 | 21935070 | CSAR_peak_ | 6.21          | + |
| chr3 | 21935225 | 21935282 | CSAR_peak_ | 9.58          | + |
| chr3 | 21935304 | 21935364 | CSAR_peak_ | 8.39,7.27     | + |
| chr3 | 21937466 | 21937517 | CSAR_peak_ | 6.21          | + |
| chr3 | 22088489 | 22088533 | CSAR_peak_ | 6.95          | + |
| chr3 | 22135659 | 22135705 | CSAR_peak_ | 7.27          | + |
| chr3 | 22136096 | 22136171 | CSAR_peak_ | 8.65,8.92     | + |
| chr3 | 22137321 | 22137360 | CSAR_peak_ | 7.27,7.92     | + |
| chr3 | 22137822 | 22137845 | CSAR_peak_ | 6.21          | + |
| chr3 | 22138010 | 22138065 | CSAR_peak_ | 7.27,6.21     | + |
| chr3 | 22138171 | 22138214 | CSAR_peak_ | 6.95,6.21     | + |
| chr3 | 22142987 | 22143104 | CSAR_peak_ | 6.57,13.48    | + |
| chr3 | 22143450 | 22143559 | CSAR_peak_ | 13.81,6.8,5.7 | + |



|      |          |          |            |                |   |
|------|----------|----------|------------|----------------|---|
| chr3 | 22143594 | 22143852 | CSAR_peak_ | 26.32,7.99,2.4 | + |
| chr3 | 22143862 | 22143963 | CSAR_peak_ | 12.74,10.96    | + |
| chr3 | 22144090 | 22144215 | CSAR_peak_ | 8.99,15.42,6.4 | + |
| chr3 | 22144643 | 22144697 | CSAR_peak_ | 6.21           | + |
| chr3 | 22144762 | 22144936 | CSAR_peak_ | 12.6,8.53,9.2  | + |
| chr3 | 22151567 | 22151620 | CSAR_peak_ | 9.77           | + |
| chr3 | 22152914 | 22152950 | CSAR_peak_ | 6.21           | + |
| chr3 | 22153269 | 22153335 | CSAR_peak_ | 7.27           | + |
| chr3 | 22154031 | 22154113 | CSAR_peak_ | 6.21,8.39      | + |
| chr3 | 22211008 | 22211063 | CSAR_peak_ | 11.14          | + |
| chr3 | 22211389 | 22211448 | CSAR_peak_ | 10.83,6.85     | + |
| chr3 | 22211529 | 22211569 | CSAR_peak_ | 12.13          | + |
| chr3 | 22212673 | 22212705 | CSAR_peak_ | 6.03           | + |
| chr3 | 22213034 | 22213066 | CSAR_peak_ | 6.95           | + |
| chr3 | 22213568 | 22213584 | CSAR_peak_ | 6.21           | + |
| chr3 | 22249886 | 22249927 | CSAR_peak_ | 8.39           | + |
| chr3 | 22266181 | 22266229 | CSAR_peak_ | 6.95           | + |
| chr3 | 22268029 | 22268069 | CSAR_peak_ | 7.27           | + |
| chr3 | 22269005 | 22269049 | CSAR_peak_ | 6.94           | + |
| chr3 | 22269337 | 22269410 | CSAR_peak_ | 11.66          | + |
| chr3 | 22332017 | 22332075 | CSAR_peak_ | 8.39           | + |
| chr3 | 22332425 | 22332513 | CSAR_peak_ | 7.34,6.44,8.3  | + |
| chr3 | 22332640 | 22332684 | CSAR_peak_ | 7.92           | + |
| chr3 | 22373918 | 22373958 | CSAR_peak_ | 6.21           | + |
| chr3 | 22400756 | 22400795 | CSAR_peak_ | 6.57           | + |
| chr3 | 22400879 | 22400904 | CSAR_peak_ | 8.39           | + |
| chr3 | 22401012 | 22401067 | CSAR_peak_ | 8.39           | + |
| chr3 | 22401399 | 22401441 | CSAR_peak_ | 16.33,7.27     | + |
| chr3 | 22401522 | 22401528 | CSAR_peak_ | 10.02          | + |
| chr3 | 22401921 | 22401991 | CSAR_peak_ | 6.57           | + |
| chr3 | 22454416 | 22454463 | CSAR_peak_ | 6.95           | + |
| chr3 | 22454776 | 22454831 | CSAR_peak_ | 6.95           | + |
| chr3 | 22454832 | 22454852 | CSAR_peak_ | 6.57           | + |
| chr3 | 22455150 | 22455266 | CSAR_peak_ | 12.21,8.52     | + |
| chr3 | 22455470 | 22455535 | CSAR_peak_ | 12.31          | + |
| chr3 | 22455733 | 22455779 | CSAR_peak_ | 7.27           | + |
| chr3 | 22456473 | 22456570 | CSAR_peak_ | 9.97           | + |
| chr3 | 22487543 | 22487629 | CSAR_peak_ | 6.21           | + |
| chr3 | 22515286 | 22515344 | CSAR_peak_ | 8.39           | + |
| chr3 | 22515408 | 22515472 | CSAR_peak_ | 8.39           | + |
| chr3 | 22515695 | 22515785 | CSAR_peak_ | 6.57           | + |
| chr3 | 22515943 | 22515994 | CSAR_peak_ | 8.65           | + |

|      |          |          |             |               |   |
|------|----------|----------|-------------|---------------|---|
| chr3 | 22516136 | 22516194 | CSAR_peak_4 | 7.36,8.94     | + |
| chr3 | 22516231 | 22516280 | CSAR_peak_4 | 6.21          | + |
| chr3 | 22516439 | 22516472 | CSAR_peak_4 | 8.39          | + |
| chr3 | 22516487 | 22516528 | CSAR_peak_4 | 6.02          | + |
| chr3 | 22597349 | 22597392 | CSAR_peak_4 | 8.39          | + |
| chr3 | 22598893 | 22598920 | CSAR_peak_4 | 5.62          | + |
| chr3 | 22600563 | 22600580 | CSAR_peak_4 | 8.39          | + |
| chr3 | 22600665 | 22600765 | CSAR_peak_4 | 5.62,11.14    | + |
| chr3 | 22603222 | 22603321 | CSAR_peak_4 | 12.78,28.21   | + |
| chr3 | 22603357 | 22603500 | CSAR_peak_4 | 23.49,17.4    | + |
| chr3 | 22603563 | 22603798 | CSAR_peak_4 | 12.13,11.8,14 | + |
| chr3 | 22603854 | 22603971 | CSAR_peak_4 | 10.94,9.27,8. | + |
| chr3 | 22604002 | 22604225 | CSAR_peak_4 | 6.57,10.02,14 | + |
| chr3 | 22604292 | 22604367 | CSAR_peak_4 | 9.31          | + |
| chr3 | 22604369 | 22604389 | CSAR_peak_4 | 9.58          | + |
| chr3 | 22604453 | 22604533 | CSAR_peak_4 | 12.5,21.56    | + |
| chr3 | 22623392 | 22623431 | CSAR_peak_4 | 9.77          | + |
| chr3 | 22625060 | 22625145 | CSAR_peak_4 | 10.62         | + |
| chr3 | 22625239 | 22625276 | CSAR_peak_4 | 8.12          | + |
| chr3 | 22625283 | 22625358 | CSAR_peak_4 | 10.83         | + |
| chr3 | 22646854 | 22646876 | CSAR_peak_4 | 6.95          | + |
| chr3 | 22734395 | 22734482 | CSAR_peak_4 | 8.65,10.95    | + |
| chr3 | 22736212 | 22736289 | CSAR_peak_4 | 8.65,6.03     | + |
| chr3 | 22736370 | 22736383 | CSAR_peak_4 | 8.39          | + |
| chr3 | 22736847 | 22736909 | CSAR_peak_4 | 11.38,10.31   | + |
| chr3 | 22736977 | 22737007 | CSAR_peak_4 | 10.83         | + |
| chr3 | 22737092 | 22737119 | CSAR_peak_4 | 5.92          | + |
| chr3 | 22737127 | 22737144 | CSAR_peak_4 | 6.44          | + |
| chr3 | 22737226 | 22737306 | CSAR_peak_4 | 9.61,17.28    | + |
| chr3 | 22737384 | 22737518 | CSAR_peak_4 | 16.25,8.13,9. | + |
| chr3 | 22737545 | 22737612 | CSAR_peak_4 | 6.2,5.92,6.64 | + |
| chr3 | 22737740 | 22737802 | CSAR_peak_4 | 7.77,14.96    | + |
| chr3 | 22737817 | 22737864 | CSAR_peak_4 | 6.21          | + |
| chr3 | 22746386 | 22746469 | CSAR_peak_4 | 8.39          | + |
| chr3 | 22747942 | 22748028 | CSAR_peak_4 | 8.65          | + |
| chr3 | 22753028 | 22753161 | CSAR_peak_4 | 9.58,6.21     | + |
| chr3 | 22753310 | 22753407 | CSAR_peak_4 | 8.39,7.58,6.9 | + |
| chr3 | 22753600 | 22753604 | CSAR_peak_4 | 6.03          | + |
| chr3 | 22786245 | 22786363 | CSAR_peak_4 | 13.09,16.33   | + |
| chr3 | 22786605 | 22786660 | CSAR_peak_4 | 7.27          | + |
| chr3 | 22786812 | 22786868 | CSAR_peak_4 | 9.27          | + |
| chr3 | 22786948 | 22786991 | CSAR_peak_4 | 9.58          | + |

|      |          |          |             |               |   |
|------|----------|----------|-------------|---------------|---|
| chr3 | 22787432 | 22787467 | CSAR_peak_4 | 6.21          | + |
| chr3 | 22787498 | 22787601 | CSAR_peak_4 | 14.88,13.48   | + |
| chr3 | 22792887 | 22793008 | CSAR_peak_4 | 7.73,10.83    | + |
| chr3 | 22796071 | 22796115 | CSAR_peak_4 | 10.95         | + |
| chr3 | 22796126 | 22796190 | CSAR_peak_4 | 11.14,12.17   | + |
| chr3 | 22796493 | 22796565 | CSAR_peak_4 | 7.58          | + |
| chr3 | 22797430 | 22797489 | CSAR_peak_4 | 6.21          | + |
| chr3 | 22829468 | 22829513 | CSAR_peak_4 | 6.21          | + |
| chr3 | 22890798 | 22890852 | CSAR_peak_4 | 6.21          | + |
| chr3 | 22964772 | 22964814 | CSAR_peak_4 | 7.73          | + |
| chr3 | 22964860 | 22964920 | CSAR_peak_4 | 12.68,15.2    | + |
| chr3 | 22964935 | 22965009 | CSAR_peak_4 | 17.98,12.78   | + |
| chr3 | 22965020 | 22965095 | CSAR_peak_4 | 11.35         | + |
| chr3 | 22965319 | 22965363 | CSAR_peak_4 | 7.27          | + |
| chr3 | 22965394 | 22965468 | CSAR_peak_4 | 8.39,10.95    | + |
| chr3 | 22965519 | 22965570 | CSAR_peak_4 | 5.9           | + |
| chr3 | 22965650 | 22965672 | CSAR_peak_4 | 6.95          | + |
| chr3 | 22965684 | 22965735 | CSAR_peak_4 | 21.51         | + |
| chr3 | 22965784 | 22965893 | CSAR_peak_4 | 11.96,16.05   | + |
| chr3 | 22965904 | 22965971 | CSAR_peak_4 | 10.64         | + |
| chr3 | 22965994 | 22966092 | CSAR_peak_4 | 19.96,20.35,  | + |
| chr3 | 22966119 | 22966173 | CSAR_peak_4 | 12.93,5.9     | + |
| chr3 | 22966212 | 22966333 | CSAR_peak_4 | 6.57,7.56,11. | + |
| chr3 | 22966452 | 22966522 | CSAR_peak_4 | 19.68         | + |
| chr3 | 22966527 | 22966569 | CSAR_peak_4 | 14.5          | + |
| chr3 | 22966574 | 22966598 | CSAR_peak_4 | 7.92          | + |
| chr3 | 22966911 | 22966948 | CSAR_peak_4 | 6.21          | + |
| chr3 | 22967019 | 22967057 | CSAR_peak_4 | 7.58          | + |
| chr3 | 22967070 | 22967140 | CSAR_peak_4 | 46.42,21.27   | + |
| chr3 | 22967152 | 22967295 | CSAR_peak_4 | 12.14,8.39,6. | + |
| chr3 | 22967627 | 22967691 | CSAR_peak_4 | 9.58          | + |
| chr3 | 22967724 | 22967794 | CSAR_peak_4 | 9.27,10.02    | + |
| chr3 | 22967846 | 22967892 | CSAR_peak_4 | 8.58          | + |
| chr3 | 22967943 | 22967990 | CSAR_peak_4 | 8.95          | + |
| chr3 | 22968035 | 22968088 | CSAR_peak_4 | 6.21          | + |
| chr3 | 22968090 | 22968238 | CSAR_peak_4 | 6.14,7.34,13. | + |
| chr3 | 22968291 | 22968399 | CSAR_peak_4 | 12.76,8.39    | + |
| chr3 | 22968437 | 22968499 | CSAR_peak_4 | 8.28          | + |
| chr3 | 22968532 | 22968587 | CSAR_peak_4 | 8.39          | + |
| chr3 | 22968769 | 22968806 | CSAR_peak_4 | 8.39          | + |
| chr3 | 22968856 | 22968928 | CSAR_peak_4 | 7.73          | + |
| chr3 | 22968957 | 22969066 | CSAR_peak_4 | 7.36,12.13    | + |

|      |          |          |            |                |   |
|------|----------|----------|------------|----------------|---|
| chr3 | 22969071 | 22969130 | CSAR_peak_ | 8.28           | + |
| chr3 | 22969189 | 22969247 | CSAR_peak_ | 10.17          | + |
| chr3 | 22969328 | 22969496 | CSAR_peak_ | 27.61,28.93,   | + |
| chr3 | 22969577 | 22969663 | CSAR_peak_ | 16.87,30.35    | + |
| chr3 | 22969732 | 22969785 | CSAR_peak_ | 29.36,6.78     | + |
| chr3 | 22969853 | 22969910 | CSAR_peak_ | 6.04,6.44      | + |
| chr3 | 22969919 | 22969984 | CSAR_peak_ | 23,17.82       | + |
| chr3 | 22970035 | 22970094 | CSAR_peak_ | 8.19,14.76     | + |
| chr3 | 22970130 | 22970359 | CSAR_peak_ | 17.82,22.56,   | + |
| chr3 | 22970411 | 22970449 | CSAR_peak_ | 9.54,8.13      | + |
| chr3 | 22970635 | 22970726 | CSAR_peak_ | 21.24,9.13,1(+ |   |
| chr3 | 22970764 | 22970860 | CSAR_peak_ | 9.54           | + |
| chr3 | 22970879 | 22970913 | CSAR_peak_ | 16.33          | + |
| chr3 | 22970989 | 22971072 | CSAR_peak_ | 6.21,16.33     | + |
| chr3 | 23022196 | 23022260 | CSAR_peak_ | 7.58           | + |
| chr3 | 23022438 | 23022474 | CSAR_peak_ | 8.39           | + |
| chr3 | 23022660 | 23022716 | CSAR_peak_ | 6.02           | + |
| chr3 | 23052745 | 23052808 | CSAR_peak_ | 11.38          | + |
| chr3 | 23055756 | 23055820 | CSAR_peak_ | 7.58           | + |
| chr3 | 23136204 | 23136267 | CSAR_peak_ | 12.37,8.69     | + |
| chr3 | 23136330 | 23136388 | CSAR_peak_ | 14.88,12.6,6.  | + |
| chr3 | 23136394 | 23136493 | CSAR_peak_ | 17.51,15.43,   | + |
| chr3 | 23136514 | 23136687 | CSAR_peak_ | 16.92,11.04,   | + |
| chr3 | 23136696 | 23136842 | CSAR_peak_ | 22.71,26.89,   | + |
| chr3 | 23136844 | 23137058 | CSAR_peak_ | 30.81,8.65,8.  | + |
| chr3 | 23137065 | 23137153 | CSAR_peak_ | 13.92,17.52    | + |
| chr3 | 23137294 | 23137339 | CSAR_peak_ | 9.58           | + |
| chr3 | 23137525 | 23137561 | CSAR_peak_ | 6.94           | + |
| chr3 | 23137636 | 23137653 | CSAR_peak_ | 6.45           | + |
| chr3 | 23137720 | 23137797 | CSAR_peak_ | 13.66          | + |
| chr3 | 23137893 | 23137912 | CSAR_peak_ | 6.57           | + |
| chr3 | 23138212 | 23138277 | CSAR_peak_ | 12.17          | + |
| chr3 | 23138305 | 23138407 | CSAR_peak_ | 13,7.58        | + |
| chr3 | 23138560 | 23138579 | CSAR_peak_ | 6.21           | + |
| chr3 | 23138906 | 23138938 | CSAR_peak_ | 6.21           | + |
| chr3 | 23138952 | 23138993 | CSAR_peak_ | 6.21           | + |
| chr3 | 23202058 | 23202124 | CSAR_peak_ | 10.95          | + |
| chr3 | 23202281 | 23202337 | CSAR_peak_ | 13.51          | + |
| chr3 | 23202479 | 23202542 | CSAR_peak_ | 6.21           | + |
| chr3 | 23202587 | 23202649 | CSAR_peak_ | 6.21           | + |
| chr3 | 23214589 | 23214640 | CSAR_peak_ | 6.57           | + |
| chr3 | 23215076 | 23215112 | CSAR_peak_ | 5.62           | + |

|      |          |          |            |                   |   |
|------|----------|----------|------------|-------------------|---|
| chr3 | 23215185 | 23215195 | CSAR_peak_ | 6.57              | + |
| chr3 | 23215730 | 23215790 | CSAR_peak_ | 10.95,10.95       | + |
| chr3 | 23215830 | 23215918 | CSAR_peak_ | 8.92,13.66        | + |
| chr3 | 23233235 | 23233315 | CSAR_peak_ | 8.65              | + |
| chr3 | 23233941 | 23233979 | CSAR_peak_ | 7.27              | + |
| chr3 | 23234981 | 23235016 | CSAR_peak_ | 7.92              | + |
| chr3 | 23303285 | 23303333 | CSAR_peak_ | 9.77,8.39         | + |
| chr3 | 23306095 | 23306191 | CSAR_peak_ | 8.39              | + |
| chr3 | 23308906 | 23308998 | CSAR_peak_ | 10.33,13.44       | + |
| chr3 | 23309202 | 23309261 | CSAR_peak_ | 9.58              | + |
| chr3 | 23309313 | 23309343 | CSAR_peak_ | 7.92              | + |
| chr3 | 23309550 | 23309568 | CSAR_peak_ | 8.95              | + |
| chr3 | 23309570 | 23309594 | CSAR_peak_ | 5.62              | + |
| chr3 | 23309657 | 23309790 | CSAR_peak_ | 8.39              | + |
| chr3 | 23310342 | 23310391 | CSAR_peak_ | 8.95              | + |
| chr3 | 23310479 | 23310535 | CSAR_peak_ | 8.39              | + |
| chr3 | 23311152 | 23311234 | CSAR_peak_ | 10.31,10.02       | + |
| chr3 | 23325249 | 23325300 | CSAR_peak_ | 11.98             | + |
| chr3 | 23325362 | 23325409 | CSAR_peak_ | 8.44              | + |
| chr3 | 23414201 | 23414237 | CSAR_peak_ | 6.21              | + |
| chr3 | 23418136 | 23418235 | CSAR_peak_ | 8.39              | + |
| chr3 | 23418465 | 23418559 | CSAR_peak_ | 10.83             | + |
| chr3 | 23445345 | 23445389 | CSAR_peak_ | 6.45              | + |
| chr3 | 23445516 | 23445530 | CSAR_peak_ | 8.95              | + |
| chr3 | 23452202 | 23452264 | CSAR_peak_ | 8.65              | + |
| chr3 | 23453607 | 23453645 | CSAR_peak_ | 6.95              | + |
| chr3 | 23453770 | 23453852 | CSAR_peak_ | 10.25,7.73,11.11  | + |
| chr3 | 23453922 | 23453985 | CSAR_peak_ | 7.27              | + |
| chr3 | 23454981 | 23455076 | CSAR_peak_ | 21.74,13.72,11.11 | + |
| chr3 | 23455136 | 23455168 | CSAR_peak_ | 14.88             | + |
| chr3 | 23455212 | 23455251 | CSAR_peak_ | 10.95             | + |
| chr3 | 23455334 | 23455369 | CSAR_peak_ | 8.13              | + |
| chr3 | 23455523 | 23455584 | CSAR_peak_ | 7.73              | + |
| chr3 | 23458346 | 23458380 | CSAR_peak_ | 6.03              | + |
| chr3 | 31503    | 31581    | CSAR_peak_ | 13.48,7.92        | - |
| chr3 | 31766    | 31835    | CSAR_peak_ | 9.58              | - |
| chr3 | 32095    | 32160    | CSAR_peak_ | 6.44,14.88        | - |
| chr3 | 32188    | 32237    | CSAR_peak_ | 6.21              | - |
| chr3 | 32347    | 32407    | CSAR_peak_ | 8.39              | - |
| chr3 | 32487    | 32549    | CSAR_peak_ | 9.27              | - |
| chr3 | 32668    | 32694    | CSAR_peak_ | 7.27              | - |
| chr3 | 32706    | 32813    | CSAR_peak_ | 12.31             | - |

|      |       |                  |                 |
|------|-------|------------------|-----------------|
| chr3 | 33034 | 33085 CSAR_peak_ | 8.39 -          |
| chr3 | 33486 | 33525 CSAR_peak_ | 5.86 -          |
| chr3 | 33537 | 33579 CSAR_peak_ | 8.39 -          |
| chr3 | 33790 | 33864 CSAR_peak_ | 19.36 -         |
| chr3 | 35422 | 35462 CSAR_peak_ | 9.58 -          |
| chr3 | 37295 | 37340 CSAR_peak_ | 8.39 -          |
| chr3 | 38465 | 38535 CSAR_peak_ | 12.31 -         |
| chr3 | 39695 | 39737 CSAR_peak_ | 9.58 -          |
| chr3 | 40043 | 40100 CSAR_peak_ | 6.21 -          |
| chr3 | 40795 | 40837 CSAR_peak_ | 6.1,8.65 -      |
| chr3 | 40944 | 40980 CSAR_peak_ | 8.39,8.65 -     |
| chr3 | 41009 | 41018 CSAR_peak_ | 7.27 -          |
| chr3 | 41136 | 41177 CSAR_peak_ | 6.21 -          |
| chr3 | 41612 | 41657 CSAR_peak_ | 7.27 -          |
| chr3 | 62497 | 62563 CSAR_peak_ | 8.39 -          |
| chr3 | 64563 | 64606 CSAR_peak_ | 6.21 -          |
| chr3 | 88271 | 88332 CSAR_peak_ | 16.33 -         |
| chr3 | 88342 | 88389 CSAR_peak_ | 23.8 -          |
| chr3 | 88527 | 88566 CSAR_peak_ | 7.92 -          |
| chr3 | 88576 | 88665 CSAR_peak_ | 8.14,11.14,2(-  |
| chr3 | 88668 | 88754 CSAR_peak_ | 14.34,9.77,1(-  |
| chr3 | 88777 | 88882 CSAR_peak_ | 19.36,12.6 -    |
| chr3 | 88970 | 89007 CSAR_peak_ | 12.13 -         |
| chr3 | 89061 | 89109 CSAR_peak_ | 7.58,5.86 -     |
| chr3 | 89168 | 89232 CSAR_peak_ | 16.33,8.39 -    |
| chr3 | 94510 | 94640 CSAR_peak_ | 14.88,5.86,2(-  |
| chr3 | 94685 | 94788 CSAR_peak_ | 9.58,15.43 -    |
| chr3 | 94854 | 94914 CSAR_peak_ | 24.52 -         |
| chr3 | 94963 | 95021 CSAR_peak_ | 6.03,6.21 -     |
| chr3 | 95109 | 95165 CSAR_peak_ | 17.82,24.17 -   |
| chr3 | 95246 | 95328 CSAR_peak_ | 9.77 -          |
| chr3 | 95386 | 95498 CSAR_peak_ | 19.36,7.78 -    |
| chr3 | 95589 | 95638 CSAR_peak_ | 13.48,6.21 -    |
| chr3 | 95854 | 95871 CSAR_peak_ | 10.83 -         |
| chr3 | 95949 | 96002 CSAR_peak_ | 7.27,7.27,7.2(- |
| chr3 | 96109 | 96157 CSAR_peak_ | 22.56,14.88 -   |
| chr3 | 96168 | 96345 CSAR_peak_ | 27.64,19.98 -   |
| chr3 | 96551 | 96693 CSAR_peak_ | 17.82,12.31,(-  |
| chr3 | 97014 | 97077 CSAR_peak_ | 10.83,7.27 -    |
| chr3 | 97230 | 97379 CSAR_peak_ | 24.21,5.86,1(-  |
| chr3 | 97418 | 97483 CSAR_peak_ | 5.62,17.87 -    |
| chr3 | 97609 | 97669 CSAR_peak_ | 19.96,9.41 -    |

|      |        |                   |                |   |
|------|--------|-------------------|----------------|---|
| chr3 | 98025  | 98068 CSAR_peak_  | 22.56,7.92     | - |
| chr3 | 98276  | 98344 CSAR_peak_  | 6.95,13.51     | - |
| chr3 | 98484  | 98574 CSAR_peak_  | 18.95,20.94    | - |
| chr3 | 98623  | 98749 CSAR_peak_  | 10.83,7.27,6.- |   |
| chr3 | 99054  | 99091 CSAR_peak_  | 6.1            | - |
| chr3 | 99201  | 99285 CSAR_peak_  | 9.61,11.14     | - |
| chr3 | 99502  | 99578 CSAR_peak_  | 22.56,16.34    | - |
| chr3 | 99858  | 99902 CSAR_peak_  | 6.78           | - |
| chr3 | 100263 | 100295 CSAR_peak_ | 12.13          | - |
| chr3 | 100395 | 100417 CSAR_peak_ | 16.19,7.27     | - |
| chr3 | 100547 | 100611 CSAR_peak_ | 21.24,14.88    | - |
| chr3 | 100786 | 100861 CSAR_peak_ | 14.76,13.51    | - |
| chr3 | 100887 | 100931 CSAR_peak_ | 6.21,8.39      | - |
| chr3 | 100970 | 101012 CSAR_peak_ | 8.65,12.13     | - |
| chr3 | 101551 | 101604 CSAR_peak_ | 5.86           | - |
| chr3 | 101640 | 101692 CSAR_peak_ | 14.88,7.27     | - |
| chr3 | 101851 | 101886 CSAR_peak_ | 12.27          | - |
| chr3 | 104682 | 104772 CSAR_peak_ | 48.77,37.79,-  |   |
| chr3 | 104828 | 104912 CSAR_peak_ | 17.54,47.38,-  |   |
| chr3 | 104979 | 105066 CSAR_peak_ | 38.9,93.31,6(- |   |
| chr3 | 146468 | 146517 CSAR_peak_ | 7.27           | - |
| chr3 | 146966 | 147029 CSAR_peak_ | 14.88,20.43    | - |
| chr3 | 159580 | 159648 CSAR_peak_ | 10.02,13.51    | - |
| chr3 | 160020 | 160095 CSAR_peak_ | 8.39,7.58      | - |
| chr3 | 160191 | 160213 CSAR_peak_ | 9.43           | - |
| chr3 | 160252 | 160397 CSAR_peak_ | 16.91,8.14,1-  |   |
| chr3 | 160500 | 160575 CSAR_peak_ | 9.03           | - |
| chr3 | 160615 | 160705 CSAR_peak_ | 18.65,16.11    | - |
| chr3 | 160833 | 160924 CSAR_peak_ | 10.94,9.58,2-  |   |
| chr3 | 160973 | 161034 CSAR_peak_ | 8.61           | - |
| chr3 | 161208 | 161326 CSAR_peak_ | 16.25,8.65     | - |
| chr3 | 161327 | 161382 CSAR_peak_ | 6.79           | - |
| chr3 | 161384 | 161437 CSAR_peak_ | 17.19          | - |
| chr3 | 161640 | 161713 CSAR_peak_ | 16.51,12.31    | - |
| chr3 | 161757 | 161820 CSAR_peak_ | 6.95,5.86      | - |
| chr3 | 161872 | 161988 CSAR_peak_ | 11.14,8.92,7.- |   |
| chr3 | 162191 | 162299 CSAR_peak_ | 6.45,7.34      | - |
| chr3 | 162433 | 162472 CSAR_peak_ | 6.03           | - |
| chr3 | 162619 | 162674 CSAR_peak_ | 16.33,14.88    | - |
| chr3 | 167944 | 168006 CSAR_peak_ | 12.13          | - |
| chr3 | 182951 | 183025 CSAR_peak_ | 9.77,8.65      | - |
| chr3 | 183284 | 183353 CSAR_peak_ | 12.17,13.29    | - |

|      |        |        |            |                |   |
|------|--------|--------|------------|----------------|---|
| chr3 | 183493 | 183560 | CSAR_peak_ | 7.73,7.68      | - |
| chr3 | 183619 | 183711 | CSAR_peak_ | 12.74          | - |
| chr3 | 184178 | 184256 | CSAR_peak_ | 17.82,10.83    | - |
| chr3 | 191663 | 191696 | CSAR_peak_ | 6.21           | - |
| chr3 | 191912 | 191968 | CSAR_peak_ | 7.34           | - |
| chr3 | 192337 | 192383 | CSAR_peak_ | 6.81,13.47     | - |
| chr3 | 192859 | 192929 | CSAR_peak_ | 13.92,8.13,1(- | - |
| chr3 | 193160 | 193206 | CSAR_peak_ | 9.77           | - |
| chr3 | 195044 | 195091 | CSAR_peak_ | 13.51          | - |
| chr3 | 195199 | 195251 | CSAR_peak_ | 9.77           | - |
| chr3 | 195276 | 195310 | CSAR_peak_ | 18.95          | - |
| chr3 | 195406 | 195467 | CSAR_peak_ | 13.48,6.21     | - |
| chr3 | 195794 | 195858 | CSAR_peak_ | 6.12           | - |
| chr3 | 196070 | 196099 | CSAR_peak_ | 6.21           | - |
| chr3 | 196207 | 196244 | CSAR_peak_ | 10.83          | - |
| chr3 | 196449 | 196506 | CSAR_peak_ | 15.43          | - |
| chr3 | 196664 | 196735 | CSAR_peak_ | 11.8,7.34,8.2- | - |
| chr3 | 197652 | 197667 | CSAR_peak_ | 12.35          | - |
| chr3 | 212834 | 212873 | CSAR_peak_ | 7.27           | - |
| chr3 | 212935 | 212991 | CSAR_peak_ | 9.58,6.03      | - |
| chr3 | 213018 | 213115 | CSAR_peak_ | 8.65,13.92     | - |
| chr3 | 213204 | 213242 | CSAR_peak_ | 7              | - |
| chr3 | 213311 | 213422 | CSAR_peak_ | 16.33,5.86,1(- | - |
| chr3 | 213565 | 213669 | CSAR_peak_ | 24.21,10.31,-  | - |
| chr3 | 213716 | 213797 | CSAR_peak_ | 25.91          | - |
| chr3 | 213804 | 214036 | CSAR_peak_ | 9.77,9.77,5.8- | - |
| chr3 | 214206 | 214288 | CSAR_peak_ | 13.85          | - |
| chr3 | 214299 | 214433 | CSAR_peak_ | 29.4,12.72     | - |
| chr3 | 214489 | 214714 | CSAR_peak_ | 7.58,12.13,2(- | - |
| chr3 | 214768 | 214826 | CSAR_peak_ | 17.82,13.48    | - |
| chr3 | 215262 | 215301 | CSAR_peak_ | 6.21           | - |
| chr3 | 215349 | 215431 | CSAR_peak_ | 17.82,23.03    | - |
| chr3 | 215606 | 215681 | CSAR_peak_ | 10.83,12.59    | - |
| chr3 | 215735 | 215786 | CSAR_peak_ | 16.19,6.71     | - |
| chr3 | 215855 | 215968 | CSAR_peak_ | 6.21,14.88     | - |
| chr3 | 216033 | 216223 | CSAR_peak_ | 9.77,21.94,1(- | - |
| chr3 | 216474 | 216509 | CSAR_peak_ | 7.27,9.58      | - |
| chr3 | 275943 | 276014 | CSAR_peak_ | 5.86,9.94      | - |
| chr3 | 276173 | 276233 | CSAR_peak_ | 11.38,7.92     | - |
| chr3 | 277181 | 277227 | CSAR_peak_ | 9.58           | - |
| chr3 | 295195 | 295240 | CSAR_peak_ | 6.21           | - |
| chr3 | 300512 | 300583 | CSAR_peak_ | 10.83          | - |



|      |        |        |            |             |   |
|------|--------|--------|------------|-------------|---|
| chr3 | 301000 | 301044 | CSAR_peak_ | 8.39        | - |
| chr3 | 301127 | 301190 | CSAR_peak_ | 10.95       | - |
| chr3 | 301874 | 301919 | CSAR_peak_ | 9.58        | - |
| chr3 | 315185 | 315234 | CSAR_peak_ | 6.21        | - |
| chr3 | 316367 | 316411 | CSAR_peak_ | 6.81,5.86   | - |
| chr3 | 316551 | 316601 | CSAR_peak_ | 9.48        | - |
| chr3 | 316605 | 316643 | CSAR_peak_ | 8.39        | - |
| chr3 | 340995 | 341068 | CSAR_peak_ | 31.2        | - |
| chr3 | 341361 | 341458 | CSAR_peak_ | 9.58        | - |
| chr3 | 341738 | 341785 | CSAR_peak_ | 7.27        | - |
| chr3 | 341922 | 341967 | CSAR_peak_ | 6.1,6.57    | - |
| chr3 | 341971 | 342061 | CSAR_peak_ | 9.77        | - |
| chr3 | 342116 | 342177 | CSAR_peak_ | 14.22       | - |
| chr3 | 342182 | 342288 | CSAR_peak_ | 6.87,8.14   | - |
| chr3 | 342319 | 342469 | CSAR_peak_ | 6.57,19.36  | - |
| chr3 | 342546 | 342614 | CSAR_peak_ | 8.65        | - |
| chr3 | 342623 | 342760 | CSAR_peak_ | 16.33,8.39  | - |
| chr3 | 342866 | 342945 | CSAR_peak_ | 7.58,7.27   | - |
| chr3 | 346511 | 346619 | CSAR_peak_ | 12.13,12.13 | - |
| chr3 | 346740 | 346802 | CSAR_peak_ | 12.13       | - |
| chr3 | 348831 | 348907 | CSAR_peak_ | 12.13,7.58  | - |
| chr3 | 349279 | 349317 | CSAR_peak_ | 7.27        | - |
| chr3 | 349771 | 349821 | CSAR_peak_ | 8.39        | - |
| chr3 | 364607 | 364659 | CSAR_peak_ | 12.13       | - |
| chr3 | 371129 | 371147 | CSAR_peak_ | 8.39        | - |
| chr3 | 385132 | 385194 | CSAR_peak_ | 6.21        | - |
| chr3 | 385543 | 385600 | CSAR_peak_ | 13.48       | - |
| chr3 | 385603 | 385725 | CSAR_peak_ | 8.65,8.53   | - |
| chr3 | 385744 | 385848 | CSAR_peak_ | 10.94,11.14 | - |
| chr3 | 386023 | 386073 | CSAR_peak_ | 7.27        | - |
| chr3 | 386158 | 386244 | CSAR_peak_ | 16.49,23.41 | - |
| chr3 | 386297 | 386346 | CSAR_peak_ | 18.65,12.31 | - |
| chr3 | 396311 | 396377 | CSAR_peak_ | 8.39,10.83  | - |
| chr3 | 412244 | 412320 | CSAR_peak_ | 14.76,6.03  | - |
| chr3 | 424330 | 424410 | CSAR_peak_ | 12.13,9.58  | - |
| chr3 | 424519 | 424566 | CSAR_peak_ | 8.39        | - |
| chr3 | 424908 | 424965 | CSAR_peak_ | 12.13       | - |
| chr3 | 425053 | 425151 | CSAR_peak_ | 17.82,14.88 | - |
| chr3 | 425159 | 425307 | CSAR_peak_ | 8.39        | - |
| chr3 | 425913 | 425975 | CSAR_peak_ | 14.88,9.58  | - |
| chr3 | 426212 | 426353 | CSAR_peak_ | 13.48,6.21  | - |
| chr3 | 426458 | 426509 | CSAR_peak_ | 7.27        | - |

|      |        |                   |                |
|------|--------|-------------------|----------------|
| chr3 | 431136 | 431183 CSAR_peak_ | 8.39 -         |
| chr3 | 431306 | 431399 CSAR_peak_ | 14.88 -        |
| chr3 | 432561 | 432596 CSAR_peak_ | 9.58 -         |
| chr3 | 432630 | 432665 CSAR_peak_ | 9.58 -         |
| chr3 | 432741 | 432792 CSAR_peak_ | 7.27 -         |
| chr3 | 433057 | 433103 CSAR_peak_ | 6.21 -         |
| chr3 | 433179 | 433276 CSAR_peak_ | 8.39 -         |
| chr3 | 433466 | 433514 CSAR_peak_ | 8.39 -         |
| chr3 | 433917 | 434053 CSAR_peak_ | 31.2 -         |
| chr3 | 434381 | 434446 CSAR_peak_ | 6.95,8.39 -    |
| chr3 | 434476 | 434570 CSAR_peak_ | 8.39,6.21 -    |
| chr3 | 434827 | 434890 CSAR_peak_ | 9.58 -         |
| chr3 | 437758 | 437814 CSAR_peak_ | 7.27 -         |
| chr3 | 438800 | 438841 CSAR_peak_ | 8.2 -          |
| chr3 | 440182 | 440214 CSAR_peak_ | 6.21 -         |
| chr3 | 440688 | 440831 CSAR_peak_ | 10.83,9.58 -   |
| chr3 | 441163 | 441252 CSAR_peak_ | 7.58,12.17 -   |
| chr3 | 443281 | 443344 CSAR_peak_ | 7.27 -         |
| chr3 | 443693 | 443754 CSAR_peak_ | 8.28,10.83 -   |
| chr3 | 444049 | 444104 CSAR_peak_ | 9.58,8.39 -    |
| chr3 | 447288 | 447337 CSAR_peak_ | 19.36,22.56 -  |
| chr3 | 487491 | 487576 CSAR_peak_ | 12.31,5.86,9.- |
| chr3 | 502978 | 503013 CSAR_peak_ | 12.13 -        |
| chr3 | 503050 | 503091 CSAR_peak_ | 5.86 -         |
| chr3 | 503600 | 503661 CSAR_peak_ | 9.58 -         |
| chr3 | 504645 | 504692 CSAR_peak_ | 7.58,6.21 -    |
| chr3 | 522620 | 522653 CSAR_peak_ | 5.86 -         |
| chr3 | 522760 | 522814 CSAR_peak_ | 5.86 -         |
| chr3 | 525887 | 525931 CSAR_peak_ | 6.21 -         |
| chr3 | 526071 | 526154 CSAR_peak_ | 10.83,7.27 -   |
| chr3 | 529012 | 529110 CSAR_peak_ | 12.13,19.36 -  |
| chr3 | 529836 | 529895 CSAR_peak_ | 9.58 -         |
| chr3 | 531292 | 531362 CSAR_peak_ | 9.77,14.76 -   |
| chr3 | 532332 | 532374 CSAR_peak_ | 10.83 -        |
| chr3 | 533338 | 533389 CSAR_peak_ | 12.31,18.65 -  |
| chr3 | 533912 | 533978 CSAR_peak_ | 20.94,6.03 -   |
| chr3 | 534072 | 534200 CSAR_peak_ | 31.19,14.88 -  |
| chr3 | 534384 | 534562 CSAR_peak_ | 24.21,6.85,1(- |
| chr3 | 534645 | 534801 CSAR_peak_ | 12.13,9.77,1(- |
| chr3 | 534919 | 534950 CSAR_peak_ | 7.27,12.17 -   |
| chr3 | 535041 | 535123 CSAR_peak_ | 17.82 -        |
| chr3 | 535285 | 535408 CSAR_peak_ | 6.21,16.33,2(- |

|      |        |        |            |                |   |
|------|--------|--------|------------|----------------|---|
| chr3 | 535456 | 535467 | CSAR_peak_ | 6.72           | - |
| chr3 | 536086 | 536234 | CSAR_peak_ | 30.81,21.94    | - |
| chr3 | 536318 | 536402 | CSAR_peak_ | 10.83,20.94    | - |
| chr3 | 537572 | 537650 | CSAR_peak_ | 7.27           | - |
| chr3 | 592499 | 592578 | CSAR_peak_ | 9.58,10.95     | - |
| chr3 | 593653 | 593841 | CSAR_peak_ | 17.4,8.99,13.  | - |
| chr3 | 594140 | 594185 | CSAR_peak_ | 12.31          | - |
| chr3 | 594214 | 594378 | CSAR_peak_ | 14.08,16.09    | - |
| chr3 | 594533 | 594587 | CSAR_peak_ | 8.65           | - |
| chr3 | 594672 | 594913 | CSAR_peak_ | 14.34,7.58,10. | - |
| chr3 | 595014 | 595092 | CSAR_peak_ | 6.21,31.2      | - |
| chr3 | 595203 | 595321 | CSAR_peak_ | 31.2,7.58      | - |
| chr3 | 595484 | 595532 | CSAR_peak_ | 9.77           | - |
| chr3 | 596096 | 596143 | CSAR_peak_ | 10.83          | - |
| chr3 | 597632 | 597645 | CSAR_peak_ | 6.21           | - |
| chr3 | 597885 | 597897 | CSAR_peak_ | 8.39           | - |
| chr3 | 597979 | 598049 | CSAR_peak_ | 15.56,27.77    | - |
| chr3 | 598505 | 598616 | CSAR_peak_ | 7.27,6.21      | - |
| chr3 | 599049 | 599101 | CSAR_peak_ | 16.33,16.08    | - |
| chr3 | 599179 | 599221 | CSAR_peak_ | 7.27           | - |
| chr3 | 599553 | 599609 | CSAR_peak_ | 10.02          | - |
| chr3 | 599623 | 599718 | CSAR_peak_ | 5.86,8.65,9.5  | - |
| chr3 | 599745 | 599832 | CSAR_peak_ | 8.39,16.33     | - |
| chr3 | 599949 | 600009 | CSAR_peak_ | 12.31          | - |
| chr3 | 600121 | 600165 | CSAR_peak_ | 7.27           | - |
| chr3 | 601061 | 601152 | CSAR_peak_ | 9.58,10.83     | - |
| chr3 | 602722 | 602761 | CSAR_peak_ | 7              | - |
| chr3 | 602953 | 603030 | CSAR_peak_ | 7.27           | - |
| chr3 | 627756 | 627842 | CSAR_peak_ | 13.48          | - |
| chr3 | 627962 | 627988 | CSAR_peak_ | 6.57,9.58      | - |
| chr3 | 628099 | 628126 | CSAR_peak_ | 7.27           | - |
| chr3 | 628317 | 628359 | CSAR_peak_ | 6.21           | - |
| chr3 | 629058 | 629105 | CSAR_peak_ | 6.85           | - |
| chr3 | 629395 | 629446 | CSAR_peak_ | 9.58,6.21      | - |
| chr3 | 705872 | 705949 | CSAR_peak_ | 16.33          | - |
| chr3 | 706211 | 706281 | CSAR_peak_ | 6.21           | - |
| chr3 | 707492 | 707526 | CSAR_peak_ | 7.27           | - |
| chr3 | 727745 | 727861 | CSAR_peak_ | 12.13,7.27     | - |
| chr3 | 727906 | 727989 | CSAR_peak_ | 17.4,8.09      | - |
| chr3 | 728021 | 728055 | CSAR_peak_ | 7.27,6.21      | - |
| chr3 | 728335 | 728421 | CSAR_peak_ | 14.88,13.48    | - |
| chr3 | 729069 | 729138 | CSAR_peak_ | 9.58           | - |

|      |        |        |            |             |   |
|------|--------|--------|------------|-------------|---|
| chr3 | 729314 | 729403 | CSAR_peak_ | 20.05,34.84 | - |
| chr3 | 750081 | 750131 | CSAR_peak_ | 19.98,14.88 | - |
| chr3 | 750235 | 750283 | CSAR_peak_ | 6.21,7.27   | - |
| chr3 | 751508 | 751589 | CSAR_peak_ | 12.17       | - |
| chr3 | 751716 | 751754 | CSAR_peak_ | 7.27        | - |
| chr3 | 752800 | 752873 | CSAR_peak_ | 7.58,9.77   | - |
| chr3 | 752978 | 753015 | CSAR_peak_ | 7.27        | - |
| chr3 | 753279 | 753336 | CSAR_peak_ | 11.96       | - |
| chr3 | 769015 | 769104 | CSAR_peak_ | 16.33       | - |
| chr3 | 770038 | 770152 | CSAR_peak_ | 20.43,16.33 | - |
| chr3 | 770894 | 770950 | CSAR_peak_ | 9.58        | - |
| chr3 | 771543 | 771599 | CSAR_peak_ | 9.58        | - |
| chr3 | 771784 | 771839 | CSAR_peak_ | 14.88       | - |
| chr3 | 771928 | 771978 | CSAR_peak_ | 7.58        | - |
| chr3 | 772347 | 772419 | CSAR_peak_ | 9.58,6.21   | - |
| chr3 | 772470 | 772477 | CSAR_peak_ | 6.21        | - |
| chr3 | 772558 | 772634 | CSAR_peak_ | 14.76,14.88 | - |
| chr3 | 772669 | 772687 | CSAR_peak_ | 6.21        | - |
| chr3 | 772830 | 772874 | CSAR_peak_ | 8.65        | - |
| chr3 | 772929 | 772979 | CSAR_peak_ | 9.58,7.27   | - |
| chr3 | 773385 | 773447 | CSAR_peak_ | 6.21        | - |
| chr3 | 773553 | 773604 | CSAR_peak_ | 10.83       | - |
| chr3 | 774789 | 774851 | CSAR_peak_ | 7.27        | - |
| chr3 | 775580 | 775621 | CSAR_peak_ | 10.83       | - |
| chr3 | 776005 | 776075 | CSAR_peak_ | 10.83       | - |
| chr3 | 779070 | 779114 | CSAR_peak_ | 7.27        | - |
| chr3 | 779815 | 779890 | CSAR_peak_ | 10.02,6.95  | - |
| chr3 | 780157 | 780230 | CSAR_peak_ | 9.58,9.58   | - |
| chr3 | 783577 | 783662 | CSAR_peak_ | 7.27        | - |
| chr3 | 838249 | 838350 | CSAR_peak_ | 12.13,12.5  | - |
| chr3 | 838671 | 838716 | CSAR_peak_ | 10.83       | - |
| chr3 | 853140 | 853186 | CSAR_peak_ | 6.95        | - |
| chr3 | 853274 | 853298 | CSAR_peak_ | 6.21        | - |
| chr3 | 853614 | 853679 | CSAR_peak_ | 14.88,13.48 | - |
| chr3 | 854119 | 854218 | CSAR_peak_ | 7.27,10.83  | - |
| chr3 | 854874 | 854941 | CSAR_peak_ | 6.21        | - |
| chr3 | 855188 | 855254 | CSAR_peak_ | 14.88       | - |
| chr3 | 855769 | 855824 | CSAR_peak_ | 14.85       | - |
| chr3 | 855835 | 855874 | CSAR_peak_ | 12.17,10.95 | - |
| chr3 | 855973 | 856044 | CSAR_peak_ | 16.54,8.39  | - |
| chr3 | 856118 | 856171 | CSAR_peak_ | 6.21,8.39   | - |
| chr3 | 856270 | 856352 | CSAR_peak_ | 13.44,19.36 | - |

|      |         |         |            |               |   |
|------|---------|---------|------------|---------------|---|
| chr3 | 912603  | 912655  | CSAR_peak_ | 7.27          | - |
| chr3 | 926438  | 926473  | CSAR_peak_ | 6.57          | - |
| chr3 | 1014730 | 1014770 | CSAR_peak_ | 10.83,8.39    | - |
| chr3 | 1015113 | 1015160 | CSAR_peak_ | 7.27          | - |
| chr3 | 1015772 | 1015793 | CSAR_peak_ | 6.21          | - |
| chr3 | 1015847 | 1015903 | CSAR_peak_ | 7.27          | - |
| chr3 | 1016338 | 1016392 | CSAR_peak_ | 6.57          | - |
| chr3 | 1016636 | 1016738 | CSAR_peak_ | 9.55,8.28,8.3 | - |
| chr3 | 1017018 | 1017054 | CSAR_peak_ | 7.27          | - |
| chr3 | 1017155 | 1017205 | CSAR_peak_ | 7.27          | - |
| chr3 | 1017318 | 1017386 | CSAR_peak_ | 7.27,12.13    | - |
| chr3 | 1017487 | 1017577 | CSAR_peak_ | 9.55,5.86     | - |
| chr3 | 1018011 | 1018048 | CSAR_peak_ | 6.03          | - |
| chr3 | 1037360 | 1037394 | CSAR_peak_ | 6.44          | - |
| chr3 | 1037509 | 1037596 | CSAR_peak_ | 9.77          | - |
| chr3 | 1062575 | 1062651 | CSAR_peak_ | 19.36         | - |
| chr3 | 1068105 | 1068162 | CSAR_peak_ | 7.27          | - |
| chr3 | 1069115 | 1069167 | CSAR_peak_ | 7.27          | - |
| chr3 | 1069177 | 1069200 | CSAR_peak_ | 7.27          | - |
| chr3 | 1069330 | 1069441 | CSAR_peak_ | 7.26,10.33    | - |
| chr3 | 1069519 | 1069536 | CSAR_peak_ | 9.58          | - |
| chr3 | 1069718 | 1069755 | CSAR_peak_ | 14.88         | - |
| chr3 | 1069910 | 1069947 | CSAR_peak_ | 7.27          | - |
| chr3 | 1070658 | 1070714 | CSAR_peak_ | 9.58          | - |
| chr3 | 1072471 | 1072506 | CSAR_peak_ | 6.21          | - |
| chr3 | 1072709 | 1072742 | CSAR_peak_ | 6.21          | - |
| chr3 | 1072904 | 1072946 | CSAR_peak_ | 10.83         | - |
| chr3 | 1091825 | 1091905 | CSAR_peak_ | 7.27,13.44    | - |
| chr3 | 1093084 | 1093121 | CSAR_peak_ | 7.27          | - |
| chr3 | 1114108 | 1114224 | CSAR_peak_ | 16.25,9.58    | - |
| chr3 | 1114237 | 1114301 | CSAR_peak_ | 6.21          | - |
| chr3 | 1114484 | 1114501 | CSAR_peak_ | 8.52,13       | - |
| chr3 | 1114594 | 1114649 | CSAR_peak_ | 30.02,18.73   | - |
| chr3 | 1115127 | 1115140 | CSAR_peak_ | 12.5          | - |
| chr3 | 1115280 | 1115360 | CSAR_peak_ | 19.98,26.43   | - |
| chr3 | 1115694 | 1115740 | CSAR_peak_ | 13.48         | - |
| chr3 | 1115767 | 1115827 | CSAR_peak_ | 6.21,7.27     | - |
| chr3 | 1115948 | 1115999 | CSAR_peak_ | 9.58          | - |
| chr3 | 1116017 | 1116072 | CSAR_peak_ | 10.83         | - |
| chr3 | 1116341 | 1116385 | CSAR_peak_ | 13.29         | - |
| chr3 | 1116396 | 1116446 | CSAR_peak_ | 7.58          | - |
| chr3 | 1116816 | 1116892 | CSAR_peak_ | 7.27,7.34     | - |

|      |         |         |            |               |   |
|------|---------|---------|------------|---------------|---|
| chr3 | 1117057 | 1117085 | CSAR_peak_ | 17.82         | - |
| chr3 | 1117480 | 1117536 | CSAR_peak_ | 20.94,6.21    | - |
| chr3 | 1117538 | 1117636 | CSAR_peak_ | 8.65          | - |
| chr3 | 1117775 | 1117872 | CSAR_peak_ | 8.39,12.13    | - |
| chr3 | 1118114 | 1118163 | CSAR_peak_ | 7.27,6.64     | - |
| chr3 | 1118243 | 1118285 | CSAR_peak_ | 20.94,7.73    | - |
| chr3 | 1118301 | 1118353 | CSAR_peak_ | 29.4          | - |
| chr3 | 1118455 | 1118522 | CSAR_peak_ | 29.4,6.57     | - |
| chr3 | 1118633 | 1118690 | CSAR_peak_ | 8.65,7.73,10. | - |
| chr3 | 1118806 | 1118818 | CSAR_peak_ | 7.27          | - |
| chr3 | 1118880 | 1119024 | CSAR_peak_ | 16.33,7.27,8. | - |
| chr3 | 1119331 | 1119358 | CSAR_peak_ | 16.33         | - |
| chr3 | 1119501 | 1119583 | CSAR_peak_ | 9.58,6.71     | - |
| chr3 | 1119742 | 1119798 | CSAR_peak_ | 9.61,15       | - |
| chr3 | 1119856 | 1119912 | CSAR_peak_ | 13.09         | - |
| chr3 | 1120207 | 1120278 | CSAR_peak_ | 11.03,7.27,7. | - |
| chr3 | 1123252 | 1123290 | CSAR_peak_ | 6.21          | - |
| chr3 | 1124082 | 1124128 | CSAR_peak_ | 7.27          | - |
| chr3 | 1148988 | 1149040 | CSAR_peak_ | 9.77          | - |
| chr3 | 1152654 | 1152706 | CSAR_peak_ | 9.58          | - |
| chr3 | 1212231 | 1212326 | CSAR_peak_ | 7.58,12.31    | - |
| chr3 | 1212470 | 1212582 | CSAR_peak_ | 14.76,12.52   | - |
| chr3 | 1212599 | 1212695 | CSAR_peak_ | 16.33,10.82   | - |
| chr3 | 1213094 | 1213136 | CSAR_peak_ | 9.58          | - |
| chr3 | 1239235 | 1239333 | CSAR_peak_ | 6.81,10.62    | - |
| chr3 | 1252169 | 1252252 | CSAR_peak_ | 14.88         | - |
| chr3 | 1252725 | 1252767 | CSAR_peak_ | 8.65,12.13    | - |
| chr3 | 1253584 | 1253660 | CSAR_peak_ | 14.88         | - |
| chr3 | 1253774 | 1253797 | CSAR_peak_ | 7.27          | - |
| chr3 | 1253803 | 1253853 | CSAR_peak_ | 10.02         | - |
| chr3 | 1254036 | 1254096 | CSAR_peak_ | 12.13,6.57    | - |
| chr3 | 1254209 | 1254278 | CSAR_peak_ | 6.21          | - |
| chr3 | 1258818 | 1258900 | CSAR_peak_ | 10.83         | - |
| chr3 | 1259021 | 1259067 | CSAR_peak_ | 6.21          | - |
| chr3 | 1259523 | 1259559 | CSAR_peak_ | 6.21          | - |
| chr3 | 1260718 | 1260785 | CSAR_peak_ | 13.48         | - |
| chr3 | 1261080 | 1261185 | CSAR_peak_ | 19.36         | - |
| chr3 | 1261232 | 1261474 | CSAR_peak_ | 9.41,9.03,25. | - |
| chr3 | 1266344 | 1266413 | CSAR_peak_ | 7.27,12.13    | - |
| chr3 | 1266765 | 1266814 | CSAR_peak_ | 7.34          | - |
| chr3 | 1267671 | 1267719 | CSAR_peak_ | 7.27          | - |
| chr3 | 1267744 | 1267771 | CSAR_peak_ | 9.58          | - |

|      |         |         |            |               |   |
|------|---------|---------|------------|---------------|---|
| chr3 | 1285829 | 1285919 | CSAR_peak_ | 8.39,13.44    | - |
| chr3 | 1286231 | 1286270 | CSAR_peak_ | 7.27,12.13    | - |
| chr3 | 1288400 | 1288552 | CSAR_peak_ | 25.91,19.36   | - |
| chr3 | 1288911 | 1288955 | CSAR_peak_ | 7.58          | - |
| chr3 | 1288977 | 1289031 | CSAR_peak_ | 12.38         | - |
| chr3 | 1289032 | 1289204 | CSAR_peak_ | 10.62,27.25,  | - |
| chr3 | 1289258 | 1289440 | CSAR_peak_ | 16.57,9.77,3  | - |
| chr3 | 1289466 | 1289611 | CSAR_peak_ | 8.2,29.04,18. | - |
| chr3 | 1289630 | 1289785 | CSAR_peak_ | 12.78,24.33,  | - |
| chr3 | 1289823 | 1289918 | CSAR_peak_ | 14.88,13.29   | - |
| chr3 | 1289931 | 1290015 | CSAR_peak_ | 12.13         | - |
| chr3 | 1290052 | 1290153 | CSAR_peak_ | 14.08,20.18   | - |
| chr3 | 1290198 | 1290271 | CSAR_peak_ | 36.59,45.5    | - |
| chr3 | 1290298 | 1290528 | CSAR_peak_ | 25.62,27.23,  | - |
| chr3 | 1391902 | 1391957 | CSAR_peak_ | 7.27          | - |
| chr3 | 1402914 | 1402970 | CSAR_peak_ | 9.58          | - |
| chr3 | 1409164 | 1409246 | CSAR_peak_ | 12.5          | - |
| chr3 | 1409391 | 1409431 | CSAR_peak_ | 5.86          | - |
| chr3 | 1409896 | 1409915 | CSAR_peak_ | 7.27          | - |
| chr3 | 1409998 | 1410034 | CSAR_peak_ | 7.27          | - |
| chr3 | 1410128 | 1410190 | CSAR_peak_ | 12.13         | - |
| chr3 | 1410766 | 1410799 | CSAR_peak_ | 7.27,6.21     | - |
| chr3 | 1410937 | 1411015 | CSAR_peak_ | 9.58          | - |
| chr3 | 1414528 | 1414575 | CSAR_peak_ | 8.39          | - |
| chr3 | 1418593 | 1418663 | CSAR_peak_ | 12.17,14.76   | - |
| chr3 | 1418820 | 1418962 | CSAR_peak_ | 8.39,10.83    | - |
| chr3 | 1419272 | 1419387 | CSAR_peak_ | 14.34,14.88   | - |
| chr3 | 1419589 | 1419625 | CSAR_peak_ | 17.82         | - |
| chr3 | 1419824 | 1419864 | CSAR_peak_ | 7.27,17.82    | - |
| chr3 | 1420043 | 1420092 | CSAR_peak_ | 9.48,9.77,6.2 | - |
| chr3 | 1420242 | 1420257 | CSAR_peak_ | 8.28          | - |
| chr3 | 1420402 | 1420494 | CSAR_peak_ | 6.32,8.28,12. | - |
| chr3 | 1420582 | 1420629 | CSAR_peak_ | 7.92          | - |
| chr3 | 1420755 | 1420816 | CSAR_peak_ | 7.7,12.17     | - |
| chr3 | 1420908 | 1420935 | CSAR_peak_ | 6.21          | - |
| chr3 | 1421468 | 1421555 | CSAR_peak_ | 13.29,9.77    | - |
| chr3 | 1422312 | 1422401 | CSAR_peak_ | 15.2          | - |
| chr3 | 1422659 | 1422739 | CSAR_peak_ | 6.95          | - |
| chr3 | 1453523 | 1453564 | CSAR_peak_ | 7.92          | - |
| chr3 | 1453734 | 1453743 | CSAR_peak_ | 6.21          | - |
| chr3 | 1453745 | 1453821 | CSAR_peak_ | 19.36,8.39    | - |
| chr3 | 1454041 | 1454095 | CSAR_peak_ | 6.03          | - |

|      |         |         |            |                |   |
|------|---------|---------|------------|----------------|---|
| chr3 | 1454209 | 1454242 | CSAR_peak_ | 6.87,6.45      | - |
| chr3 | 1454333 | 1454396 | CSAR_peak_ | 9.32,5.95      | - |
| chr3 | 1454509 | 1454594 | CSAR_peak_ | 12.17,8.95     | - |
| chr3 | 1454713 | 1454785 | CSAR_peak_ | 14.76          | - |
| chr3 | 1454923 | 1455013 | CSAR_peak_ | 12.13          | - |
| chr3 | 1455326 | 1455406 | CSAR_peak_ | 7.27,13.44     | - |
| chr3 | 1455496 | 1455538 | CSAR_peak_ | 6.57           | - |
| chr3 | 1455651 | 1455733 | CSAR_peak_ | 14.22          | - |
| chr3 | 1455805 | 1455879 | CSAR_peak_ | 12.74,14.88    | - |
| chr3 | 1456028 | 1456046 | CSAR_peak_ | 6.71           | - |
| chr3 | 1456947 | 1456994 | CSAR_peak_ | 6.21           | - |
| chr3 | 1458051 | 1458103 | CSAR_peak_ | 14.88          | - |
| chr3 | 1458279 | 1458363 | CSAR_peak_ | 12.31,11.47    | - |
| chr3 | 1458573 | 1458628 | CSAR_peak_ | 16.11,7.27     | - |
| chr3 | 1458801 | 1458876 | CSAR_peak_ | 9.58,9.58      | - |
| chr3 | 1458979 | 1458987 | CSAR_peak_ | 6.12           | - |
| chr3 | 1459029 | 1459050 | CSAR_peak_ | 9.31           | - |
| chr3 | 1459155 | 1459209 | CSAR_peak_ | 20.94          | - |
| chr3 | 1459313 | 1459418 | CSAR_peak_ | 15.2,40.86     | - |
| chr3 | 1459487 | 1459504 | CSAR_peak_ | 10.31          | - |
| chr3 | 1459517 | 1459550 | CSAR_peak_ | 6.87,6.45      | - |
| chr3 | 1459641 | 1459723 | CSAR_peak_ | 12.94,6.51     | - |
| chr3 | 1459817 | 1459939 | CSAR_peak_ | 12.17,15.32,-  | - |
| chr3 | 1459990 | 1460076 | CSAR_peak_ | 12.21,22.85    | - |
| chr3 | 1460237 | 1460285 | CSAR_peak_ | 11.41          | - |
| chr3 | 1460314 | 1460363 | CSAR_peak_ | 7.27,12.17     | - |
| chr3 | 1460435 | 1460472 | CSAR_peak_ | 13.66          | - |
| chr3 | 1460494 | 1460500 | CSAR_peak_ | 12.13          | - |
| chr3 | 1460585 | 1460636 | CSAR_peak_ | 10.7,11.57     | - |
| chr3 | 1460658 | 1460661 | CSAR_peak_ | 7.27           | - |
| chr3 | 1460810 | 1460876 | CSAR_peak_ | 32.27,16.55    | - |
| chr3 | 1460966 | 1461098 | CSAR_peak_ | 15.94,26.69    | - |
| chr3 | 1461145 | 1461290 | CSAR_peak_ | 10.95,8.39,6.- | - |
| chr3 | 1461364 | 1461404 | CSAR_peak_ | 15.32          | - |
| chr3 | 1462449 | 1462549 | CSAR_peak_ | 11.83,10.82    | - |
| chr3 | 1462597 | 1462688 | CSAR_peak_ | 27.96,10.18,-  | - |
| chr3 | 1462708 | 1462796 | CSAR_peak_ | 7.78,7.34      | - |
| chr3 | 1501371 | 1501433 | CSAR_peak_ | 9.58           | - |
| chr3 | 1501568 | 1501640 | CSAR_peak_ | 6.21           | - |
| chr3 | 1501986 | 1502043 | CSAR_peak_ | 6.21           | - |
| chr3 | 1505513 | 1505586 | CSAR_peak_ | 12.13,10.02    | - |
| chr3 | 1513250 | 1513308 | CSAR_peak_ | 6.21           | - |



|      |         |         |            |               |   |
|------|---------|---------|------------|---------------|---|
| chr3 | 1513642 | 1513722 | CSAR_peak_ | 7.27          | - |
| chr3 | 1514034 | 1514140 | CSAR_peak_ | 9.77,7.58,7.2 | - |
| chr3 | 1523124 | 1523165 | CSAR_peak_ | 8.65,8.39     | - |
| chr3 | 1523267 | 1523310 | CSAR_peak_ | 12.13         | - |
| chr3 | 1523370 | 1523451 | CSAR_peak_ | 12.13,10.95   | - |
| chr3 | 1527771 | 1527841 | CSAR_peak_ | 14.76         | - |
| chr3 | 1528014 | 1528058 | CSAR_peak_ | 9.58          | - |
| chr3 | 1528918 | 1528954 | CSAR_peak_ | 9.58          | - |
| chr3 | 1529050 | 1529093 | CSAR_peak_ | 6.21          | - |
| chr3 | 1529913 | 1529963 | CSAR_peak_ | 8.2,7.58      | - |
| chr3 | 1530138 | 1530192 | CSAR_peak_ | 12.13         | - |
| chr3 | 1531528 | 1531623 | CSAR_peak_ | 12.17,6.81,9. | - |
| chr3 | 1532113 | 1532170 | CSAR_peak_ | 6.21          | - |
| chr3 | 1618776 | 1618826 | CSAR_peak_ | 8.39          | - |
| chr3 | 1618959 | 1619137 | CSAR_peak_ | 7.58,12.13,1. | - |
| chr3 | 1640680 | 1640758 | CSAR_peak_ | 7.27          | - |
| chr3 | 1663220 | 1663265 | CSAR_peak_ | 8.39          | - |
| chr3 | 1663745 | 1663804 | CSAR_peak_ | 8.39,7.58     | - |
| chr3 | 1665181 | 1665243 | CSAR_peak_ | 10.83         | - |
| chr3 | 1665591 | 1665641 | CSAR_peak_ | 6.21          | - |
| chr3 | 1668022 | 1668057 | CSAR_peak_ | 9.58          | - |
| chr3 | 1668780 | 1668826 | CSAR_peak_ | 6.44,10.83    | - |
| chr3 | 1753592 | 1753666 | CSAR_peak_ | 9.58,10.83    | - |
| chr3 | 1754258 | 1754401 | CSAR_peak_ | 7.58,59.38,3. | - |
| chr3 | 1754457 | 1754564 | CSAR_peak_ | 17.37,12.17   | - |
| chr3 | 1754687 | 1754738 | CSAR_peak_ | 13.51         | - |
| chr3 | 1754822 | 1754905 | CSAR_peak_ | 12.13         | - |
| chr3 | 1755040 | 1755053 | CSAR_peak_ | 6.44,7.73     | - |
| chr3 | 1755178 | 1755239 | CSAR_peak_ | 10.83         | - |
| chr3 | 1755277 | 1755335 | CSAR_peak_ | 7.27,10.83    | - |
| chr3 | 1755373 | 1755438 | CSAR_peak_ | 9.58,27.11    | - |
| chr3 | 1755517 | 1755671 | CSAR_peak_ | 36.78,49.4,7. | - |
| chr3 | 1755699 | 1755893 | CSAR_peak_ | 26.55,21.31,! | - |
| chr3 | 1755990 | 1756102 | CSAR_peak_ | 17.82,24.52   | - |
| chr3 | 1756163 | 1756202 | CSAR_peak_ | 7.27          | - |
| chr3 | 1756216 | 1756346 | CSAR_peak_ | 22.52,23.21,! | - |
| chr3 | 1756392 | 1756521 | CSAR_peak_ | 9.54,19.98,1. | - |
| chr3 | 1758033 | 1758086 | CSAR_peak_ | 12.13         | - |
| chr3 | 1758222 | 1758263 | CSAR_peak_ | 7.27          | - |
| chr3 | 1761557 | 1761691 | CSAR_peak_ | 8.39,6.21,7.2 | - |
| chr3 | 1761747 | 1761887 | CSAR_peak_ | 8.39,20.35    | - |
| chr3 | 1762165 | 1762216 | CSAR_peak_ | 6.21          | - |

|      |         |         |            |                 |
|------|---------|---------|------------|-----------------|
| chr3 | 1762530 | 1762797 | CSAR_peak_ | 14.88,9.58,9.-  |
| chr3 | 1762807 | 1762895 | CSAR_peak_ | 14.76 -         |
| chr3 | 1762959 | 1763204 | CSAR_peak_ | 14.88,25.91,1.- |
| chr3 | 1763292 | 1763366 | CSAR_peak_ | 10.95 -         |
| chr3 | 1764543 | 1764617 | CSAR_peak_ | 11.14,9.58 -    |
| chr3 | 1764823 | 1764864 | CSAR_peak_ | 10.83,13.48 -   |
| chr3 | 1764954 | 1765016 | CSAR_peak_ | 7.27 -          |
| chr3 | 1765364 | 1765377 | CSAR_peak_ | 6.03 -          |
| chr3 | 1765454 | 1765526 | CSAR_peak_ | 16.05,12.13 -   |
| chr3 | 1765844 | 1765888 | CSAR_peak_ | 9.61 -          |
| chr3 | 1765975 | 1766041 | CSAR_peak_ | 6.21 -          |
| chr3 | 1766569 | 1766620 | CSAR_peak_ | 10.12 -         |
| chr3 | 1770426 | 1770466 | CSAR_peak_ | 7.27 -          |
| chr3 | 1770793 | 1770835 | CSAR_peak_ | 10.02 -         |
| chr3 | 1771055 | 1771143 | CSAR_peak_ | 20.43,28.34 -   |
| chr3 | 1771410 | 1771464 | CSAR_peak_ | 42.87,12.6 -    |
| chr3 | 1771642 | 1771702 | CSAR_peak_ | 17.82 -         |
| chr3 | 1772285 | 1772335 | CSAR_peak_ | 9.58 -          |
| chr3 | 1772467 | 1772539 | CSAR_peak_ | 21.56,14.76 -   |
| chr3 | 1774245 | 1774356 | CSAR_peak_ | 6.21,25.91 -    |
| chr3 | 1777830 | 1777869 | CSAR_peak_ | 6.21 -          |
| chr3 | 1786899 | 1787018 | CSAR_peak_ | 9.58,17.82,8.-  |
| chr3 | 1787062 | 1787109 | CSAR_peak_ | 12.13,6.44 -    |
| chr3 | 1787156 | 1787182 | CSAR_peak_ | 10.83,7.58 -    |
| chr3 | 1787408 | 1787458 | CSAR_peak_ | 8.39 -          |
| chr3 | 1787735 | 1787779 | CSAR_peak_ | 10.83,17.4 -    |
| chr3 | 1787980 | 1788036 | CSAR_peak_ | 9.58 -          |
| chr3 | 1788138 | 1788211 | CSAR_peak_ | 7.27,10.96 -    |
| chr3 | 1788465 | 1788502 | CSAR_peak_ | 13.48,9.58 -    |
| chr3 | 1788951 | 1789082 | CSAR_peak_ | 19.36,19.98 -   |
| chr3 | 1789192 | 1789256 | CSAR_peak_ | 14.88,7.27 -    |
| chr3 | 1789510 | 1789530 | CSAR_peak_ | 10.83 -         |
| chr3 | 1789683 | 1789735 | CSAR_peak_ | 14.08,8.65 -    |
| chr3 | 1790338 | 1790396 | CSAR_peak_ | 7.34,12.17 -    |
| chr3 | 1790629 | 1790697 | CSAR_peak_ | 7.27,7.27 -     |
| chr3 | 1791036 | 1791051 | CSAR_peak_ | 15.28 -         |
| chr3 | 1791145 | 1791225 | CSAR_peak_ | 58.04,9.58 -    |
| chr3 | 1791470 | 1791565 | CSAR_peak_ | 42.33,7.73,9.-  |
| chr3 | 1791614 | 1791640 | CSAR_peak_ | 24.21 -         |
| chr3 | 1823594 | 1823675 | CSAR_peak_ | 6.21 -          |
| chr3 | 1824749 | 1824805 | CSAR_peak_ | 6.21 -          |
| chr3 | 1826397 | 1826417 | CSAR_peak_ | 6.21 -          |

|      |         |         |             |               |   |
|------|---------|---------|-------------|---------------|---|
| chr3 | 1831525 | 1831600 | CSAR_peak_  | 10.33,6.45    | - |
| chr3 | 1831797 | 1831889 | CSAR_peak_  | 37.55,12.35   | - |
| chr3 | 1834567 | 1834637 | CSAR_peak_  | 14.88         | - |
| chr3 | 1834784 | 1834855 | CSAR_peak_  | 27.64,8.65    | - |
| chr3 | 1834924 | 1834994 | CSAR_peak_  | 10.94,9.35    | - |
| chr3 | 1835046 | 1835224 | CSAR_peak_  | 36.78,28.62   | - |
| chr3 | 1835251 | 1835349 | CSAR_peak_  | 14.59,7.68    | - |
| chr3 | 1835359 | 1835443 | CSAR_peak_  | 26.69,6.85    | - |
| chr3 | 1835520 | 1835649 | CSAR_peak_  | 12.74,21.64,1 | - |
| chr3 | 1835730 | 1835883 | CSAR_peak_  | 7.32,15.02,1  | - |
| chr3 | 1836026 | 1836139 | CSAR_peak_  | 14.88,38.89,1 | - |
| chr3 | 1836209 | 1836271 | CSAR_peak_  | 9.58          | - |
| chr3 | 1836317 | 1836422 | CSAR_peak_  | 10.95         | - |
| chr3 | 1837055 | 1837169 | CSAR_peak_  | 45.96,28.62   | - |
| chr3 | 1837174 | 1837191 | CSAR_peak_  | 7.27          | - |
| chr3 | 1837246 | 1837323 | CSAR_peak_  | 8.92          | - |
| chr3 | 1837417 | 1837472 | CSAR_peak_  | 7.27          | - |
| chr3 | 1874636 | 1874696 | CSAR_peak_  | 7.27          | - |
| chr3 | 1889772 | 1889830 | CSAR_peak_! | 6.81          | - |
| chr3 | 1890107 | 1890174 | CSAR_peak_  | 7.27,9.48     | - |
| chr3 | 1899983 | 1900019 | CSAR_peak_! | 8.39          | - |
| chr3 | 1900856 | 1900923 | CSAR_peak_  | 7.27          | - |
| chr3 | 1903251 | 1903290 | CSAR_peak_  | 6.21          | - |
| chr3 | 1903399 | 1903458 | CSAR_peak_  | 10.94         | - |
| chr3 | 1925603 | 1925673 | CSAR_peak_  | 8.39          | - |
| chr3 | 1947965 | 1948042 | CSAR_peak_  | 7.27,7.27     | - |
| chr3 | 1963744 | 1963794 | CSAR_peak_! | 5.86          | - |
| chr3 | 1966454 | 1966588 | CSAR_peak_! | 9.55,8.2      | - |
| chr3 | 1967429 | 1967521 | CSAR_peak_! | 8.14          | - |
| chr3 | 1967892 | 1967986 | CSAR_peak_! | 8.14,9.58     | - |
| chr3 | 1969262 | 1969351 | CSAR_peak_! | 8.14          | - |
| chr3 | 1970539 | 1970671 | CSAR_peak_  | 12.31,7.27    | - |
| chr3 | 1976258 | 1976353 | CSAR_peak_! | 6.81,5.86     | - |
| chr3 | 1977846 | 1977858 | CSAR_peak_  | 6.21          | - |
| chr3 | 1977948 | 1977977 | CSAR_peak_  | 7.27          | - |
| chr3 | 1978093 | 1978115 | CSAR_peak_  | 7.27,10.83    | - |
| chr3 | 1978231 | 1978272 | CSAR_peak_  | 6.03,8.65     | - |
| chr3 | 1978747 | 1978806 | CSAR_peak_  | 13.48,10.83   | - |
| chr3 | 1979042 | 1979122 | CSAR_peak_  | 8.39,6.21     | - |
| chr3 | 1979194 | 1979260 | CSAR_peak_  | 10.83,8.39    | - |
| chr3 | 1985694 | 1985776 | CSAR_peak_  | 7.27,6.57,7.2 | - |
| chr3 | 1986259 | 1986319 | CSAR_peak_! | 6.81          | - |

|      |         |         |            |               |   |
|------|---------|---------|------------|---------------|---|
| chr3 | 1986796 | 1986981 | CSAR_peak_ | 23.03,12.17   | - |
| chr3 | 1987061 | 1987082 | CSAR_peak_ | 10.83         | - |
| chr3 | 1987179 | 1987228 | CSAR_peak_ | 10.62,16.33   | - |
| chr3 | 1987291 | 1987397 | CSAR_peak_ | 14.88,8.65    | - |
| chr3 | 1987429 | 1987514 | CSAR_peak_ | 16.34,6.44    | - |
| chr3 | 1987617 | 1987679 | CSAR_peak_ | 8.39,10.83    | - |
| chr3 | 1987707 | 1987748 | CSAR_peak_ | 7.27          | - |
| chr3 | 1988017 | 1988041 | CSAR_peak_ | 8.39          | - |
| chr3 | 1988289 | 1988328 | CSAR_peak_ | 12.13         | - |
| chr3 | 1988621 | 1988694 | CSAR_peak_ | 6.21,14.88    | - |
| chr3 | 1990924 | 1991094 | CSAR_peak_ | 8.39,7.27,7.5 | - |
| chr3 | 1991219 | 1991352 | CSAR_peak_ | 10.82,10.83   | - |
| chr3 | 1991634 | 1991696 | CSAR_peak_ | 40.66,6.81    | - |
| chr3 | 1991759 | 1991806 | CSAR_peak_ | 25.91,17.37   | - |
| chr3 | 1991933 | 1992035 | CSAR_peak_ | 8.39,7.27     | - |
| chr3 | 1992466 | 1992563 | CSAR_peak_ | 8.39          | - |
| chr3 | 2035372 | 2035442 | CSAR_peak_ | 9.58          | - |
| chr3 | 2037140 | 2037187 | CSAR_peak_ | 6.21          | - |
| chr3 | 2039230 | 2039331 | CSAR_peak_ | 9.58,24.21    | - |
| chr3 | 2040292 | 2040344 | CSAR_peak_ | 12.13         | - |
| chr3 | 2040629 | 2040693 | CSAR_peak_ | 11.63         | - |
| chr3 | 2041212 | 2041273 | CSAR_peak_ | 12.13         | - |
| chr3 | 2041429 | 2041482 | CSAR_peak_ | 9.58          | - |
| chr3 | 2042032 | 2042066 | CSAR_peak_ | 6.21          | - |
| chr3 | 2042428 | 2042505 | CSAR_peak_ | 9.77          | - |
| chr3 | 2042632 | 2042685 | CSAR_peak_ | 13.48,16.33   | - |
| chr3 | 2049367 | 2049395 | CSAR_peak_ | 7.34          | - |
| chr3 | 2049443 | 2049517 | CSAR_peak_ | 7.27,6.21     | - |
| chr3 | 2049602 | 2049667 | CSAR_peak_ | 20.43         | - |
| chr3 | 2049735 | 2049806 | CSAR_peak_ | 20.94         | - |
| chr3 | 2049892 | 2049906 | CSAR_peak_ | 9.58          | - |
| chr3 | 2049918 | 2050027 | CSAR_peak_ | 17.82,9.77    | - |
| chr3 | 2050220 | 2050277 | CSAR_peak_ | 12.13         | - |
| chr3 | 2050283 | 2050285 | CSAR_peak_ | 6.03          | - |
| chr3 | 2050373 | 2050451 | CSAR_peak_ | 5.86,10.94,1  | - |
| chr3 | 2050515 | 2050559 | CSAR_peak_ | 6.21          | - |
| chr3 | 2050651 | 2050688 | CSAR_peak_ | 6.21          | - |
| chr3 | 2051182 | 2051222 | CSAR_peak_ | 7.27          | - |
| chr3 | 2051864 | 2051888 | CSAR_peak_ | 9.77          | - |
| chr3 | 2051902 | 2051951 | CSAR_peak_ | 8.39          | - |
| chr3 | 2062367 | 2062404 | CSAR_peak_ | 6.21          | - |
| chr3 | 2063103 | 2063171 | CSAR_peak_ | 12.13,6.95    | - |

|      |         |         |            |                  |   |
|------|---------|---------|------------|------------------|---|
| chr3 | 2063178 | 2063198 | CSAR_peak_ | 6.03             | - |
| chr3 | 2063399 | 2063452 | CSAR_peak_ | 9.58             | - |
| chr3 | 2063657 | 2063724 | CSAR_peak_ | 9.58             | - |
| chr3 | 2063817 | 2063867 | CSAR_peak_ | 7.34,7.58        | - |
| chr3 | 2064223 | 2064298 | CSAR_peak_ | 19.36,7.58       | - |
| chr3 | 2064512 | 2064584 | CSAR_peak_ | 31.2,14.08       | - |
| chr3 | 2064752 | 2064812 | CSAR_peak_ | 13.48,6.21       | - |
| chr3 | 2065071 | 2065081 | CSAR_peak_ | 7.27             | - |
| chr3 | 2065265 | 2065306 | CSAR_peak_ | 9.58,9.58        | - |
| chr3 | 2065412 | 2065520 | CSAR_peak_ | 7.27,17.82,11.38 | - |
| chr3 | 2066190 | 2066256 | CSAR_peak_ | 6.57             | - |
| chr3 | 2066581 | 2066624 | CSAR_peak_ | 7.27             | - |
| chr3 | 2066848 | 2066908 | CSAR_peak_ | 8.95,9.58        | - |
| chr3 | 2075036 | 2075097 | CSAR_peak_ | 6.21             | - |
| chr3 | 2079285 | 2079343 | CSAR_peak_ | 12.17            | - |
| chr3 | 2079839 | 2079887 | CSAR_peak_ | 7.92             | - |
| chr3 | 2079892 | 2079910 | CSAR_peak_ | 6.57             | - |
| chr3 | 2080002 | 2080045 | CSAR_peak_ | 7.27             | - |
| chr3 | 2080799 | 2080902 | CSAR_peak_ | 6.03             | - |
| chr3 | 2081392 | 2081444 | CSAR_peak_ | 11.38            | - |
| chr3 | 2081532 | 2081581 | CSAR_peak_ | 6.21,8.39        | - |
| chr3 | 2081724 | 2081769 | CSAR_peak_ | 7.27             | - |
| chr3 | 2105734 | 2105860 | CSAR_peak_ | 20.94,16.33      | - |
| chr3 | 2105984 | 2106036 | CSAR_peak_ | 12.13            | - |
| chr3 | 2106057 | 2106117 | CSAR_peak_ | 19.36,9.58       | - |
| chr3 | 2106164 | 2106205 | CSAR_peak_ | 6.21             | - |
| chr3 | 2106277 | 2106346 | CSAR_peak_ | 12.31            | - |
| chr3 | 2106661 | 2106712 | CSAR_peak_ | 12.59,9.61       | - |
| chr3 | 2107045 | 2107167 | CSAR_peak_ | 10.83,14.92      | - |
| chr3 | 2107427 | 2107577 | CSAR_peak_ | 14.88,7.27       | - |
| chr3 | 2107666 | 2107753 | CSAR_peak_ | 19.36,17.82      | - |
| chr3 | 2107757 | 2107831 | CSAR_peak_ | 19.36,8.13       | - |
| chr3 | 2108245 | 2108287 | CSAR_peak_ | 7.27             | - |
| chr3 | 2108304 | 2108351 | CSAR_peak_ | 13.51            | - |
| chr3 | 2108463 | 2108510 | CSAR_peak_ | 6.81,5.86        | - |
| chr3 | 2109286 | 2109351 | CSAR_peak_ | 20.94            | - |
| chr3 | 2109438 | 2109492 | CSAR_peak_ | 24.21,27.77      | - |
| chr3 | 2109503 | 2109516 | CSAR_peak_ | 6.21             | - |
| chr3 | 2109599 | 2109646 | CSAR_peak_ | 7.58,5.86,10.39  | - |
| chr3 | 2109947 | 2109992 | CSAR_peak_ | 8.39             | - |
| chr3 | 2110374 | 2110474 | CSAR_peak_ | 6.81,9.97,9.58   | - |
| chr3 | 2111022 | 2111080 | CSAR_peak_ | 19.36            | - |

|      |         |         |            |               |   |
|------|---------|---------|------------|---------------|---|
| chr3 | 2112100 | 2112174 | CSAR_peak_ | 13.66,8.39    | - |
| chr3 | 2112317 | 2112373 | CSAR_peak_ | 13.51,7.92    | - |
| chr3 | 2112491 | 2112543 | CSAR_peak_ | 9.27,7.78,13. | - |
| chr3 | 2116393 | 2116452 | CSAR_peak_ | 6.21          | - |
| chr3 | 2116738 | 2116788 | CSAR_peak_ | 7.27          | - |
| chr3 | 2117256 | 2117298 | CSAR_peak_ | 7.27          | - |
| chr3 | 2117545 | 2117603 | CSAR_peak_ | 11.96,10.83   | - |
| chr3 | 2117699 | 2117824 | CSAR_peak_ | 12.74,6.81,1. | - |
| chr3 | 2117924 | 2117971 | CSAR_peak_ | 6.21          | - |
| chr3 | 2136282 | 2136364 | CSAR_peak_ | 7.27,19.36    | - |
| chr3 | 2151782 | 2151862 | CSAR_peak_ | 6.21,7.27     | - |
| chr3 | 2152615 | 2152671 | CSAR_peak_ | 7.92,8.65     | - |
| chr3 | 2158457 | 2158510 | CSAR_peak_ | 9.58          | - |
| chr3 | 2158552 | 2158616 | CSAR_peak_ | 7.27,15.2     | - |
| chr3 | 2158819 | 2158874 | CSAR_peak_ | 9.58          | - |
| chr3 | 2159151 | 2159198 | CSAR_peak_ | 6.21          | - |
| chr3 | 2159273 | 2159442 | CSAR_peak_ | 12.17,12.74,! | - |
| chr3 | 2159448 | 2159501 | CSAR_peak_ | 9.58          | - |
| chr3 | 2159702 | 2159777 | CSAR_peak_ | 6.21,10.95    | - |
| chr3 | 2160423 | 2160481 | CSAR_peak_ | 7.27,10.83    | - |
| chr3 | 2178182 | 2178341 | CSAR_peak_ | 73.31,226.93- | - |
| chr3 | 2213162 | 2213195 | CSAR_peak_ | 7.27          | - |
| chr3 | 2218704 | 2218735 | CSAR_peak_ | 6.21          | - |
| chr3 | 2218891 | 2218968 | CSAR_peak_ | 12.17         | - |
| chr3 | 2219058 | 2219134 | CSAR_peak_ | 10.31         | - |
| chr3 | 2219344 | 2219384 | CSAR_peak_ | 6.21          | - |
| chr3 | 2245679 | 2245748 | CSAR_peak_ | 7.27          | - |
| chr3 | 2245859 | 2245915 | CSAR_peak_ | 8.95          | - |
| chr3 | 2246125 | 2246202 | CSAR_peak_ | 6.57          | - |
| chr3 | 2246235 | 2246258 | CSAR_peak_ | 6.03          | - |
| chr3 | 2246596 | 2246666 | CSAR_peak_ | 14.88         | - |
| chr3 | 2246759 | 2246812 | CSAR_peak_ | 7.27          | - |
| chr3 | 2246944 | 2247051 | CSAR_peak_ | 18.95,12.13   | - |
| chr3 | 2247214 | 2247313 | CSAR_peak_ | 6.21,8.28     | - |
| chr3 | 2247550 | 2247619 | CSAR_peak_ | 8.65          | - |
| chr3 | 2248455 | 2248491 | CSAR_peak_ | 7.58          | - |
| chr3 | 2248563 | 2248646 | CSAR_peak_ | 12.5          | - |
| chr3 | 2248769 | 2248824 | CSAR_peak_ | 12.74         | - |
| chr3 | 2264649 | 2264728 | CSAR_peak_ | 16.33,13.51   | - |
| chr3 | 2264938 | 2264986 | CSAR_peak_ | 9.77          | - |
| chr3 | 2265354 | 2265379 | CSAR_peak_ | 8.28          | - |
| chr3 | 2265472 | 2265529 | CSAR_peak_ | 20.43,20.43   | - |

|      |         |         |             |                |   |
|------|---------|---------|-------------|----------------|---|
| chr3 | 2265911 | 2265956 | CSAR_peak_  | 8.39           | - |
| chr3 | 2266185 | 2266241 | CSAR_peak_  | 13.37,5.79     | - |
| chr3 | 2266306 | 2266333 | CSAR_peak_  | 6.45           | - |
| chr3 | 2266633 | 2266666 | CSAR_peak_  | 16.33          | - |
| chr3 | 2266739 | 2266786 | CSAR_peak_  | 17.82,7.27     | - |
| chr3 | 2267271 | 2267360 | CSAR_peak_  | 8.39           | - |
| chr3 | 2267382 | 2267424 | CSAR_peak_  | 10.94          | - |
| chr3 | 2268035 | 2268079 | CSAR_peak_  | 14.76          | - |
| chr3 | 2268133 | 2268183 | CSAR_peak_  | 7.27,6.21      | - |
| chr3 | 2268343 | 2268380 | CSAR_peak_  | 8.39           | - |
| chr3 | 2268416 | 2268456 | CSAR_peak_  | 9.58           | - |
| chr3 | 2268539 | 2268604 | CSAR_peak_  | 12.5,11.14     | - |
| chr3 | 2268689 | 2268817 | CSAR_peak_  | 26.43,34.89    | - |
| chr3 | 2269580 | 2269690 | CSAR_peak_  | 19.36,21.35,!  | - |
| chr3 | 2269888 | 2269985 | CSAR_peak_  | 33.03,19.93    | - |
| chr3 | 2270139 | 2270314 | CSAR_peak_  | 8.92,7.58,10.- | - |
| chr3 | 2270324 | 2270369 | CSAR_peak_  | 8.44,17.68     | - |
| chr3 | 2270533 | 2270690 | CSAR_peak_  | 20.43,16.25,!  | - |
| chr3 | 2270823 | 2270881 | CSAR_peak_  | 12.13,7.27     | - |
| chr3 | 2271058 | 2271113 | CSAR_peak_  | 14.88          | - |
| chr3 | 2271115 | 2271160 | CSAR_peak_  | 18.89          | - |
| chr3 | 2271241 | 2271351 | CSAR_peak_  | 14.22,50.28    | - |
| chr3 | 2271431 | 2271451 | CSAR_peak_  | 6.03,14.88     | - |
| chr3 | 2271476 | 2271541 | CSAR_peak_  | 10.57          | - |
| chr3 | 2271748 | 2271801 | CSAR_peak_  | 14.76,13.51    | - |
| chr3 | 2271966 | 2272025 | CSAR_peak_  | 11.63          | - |
| chr3 | 2272037 | 2272133 | CSAR_peak_! | 6.64,16.11     | - |
| chr3 | 2272261 | 2272349 | CSAR_peak_  | 25.65,18.73    | - |
| chr3 | 2272454 | 2272591 | CSAR_peak_  | 17.28,32.27    | - |
| chr3 | 2272937 | 2272972 | CSAR_peak_  | 7.92           | - |
| chr3 | 2273345 | 2273382 | CSAR_peak_  | 7.27           | - |
| chr3 | 2273400 | 2273417 | CSAR_peak_  | 6.21           | - |
| chr3 | 2273757 | 2273885 | CSAR_peak_  | 16.11,23.49    | - |
| chr3 | 2274240 | 2274359 | CSAR_peak_  | 12.31,7.58,6.- | - |
| chr3 | 2274451 | 2274509 | CSAR_peak_  | 7.27           | - |
| chr3 | 2274544 | 2274624 | CSAR_peak_  | 16.6,12.09     | - |
| chr3 | 2274703 | 2274757 | CSAR_peak_  | 11.63          | - |
| chr3 | 2275028 | 2275134 | CSAR_peak_  | 12.31,6.45     | - |
| chr3 | 2275207 | 2275248 | CSAR_peak_  | 12.17          | - |
| chr3 | 2275559 | 2275676 | CSAR_peak_  | 9.03,13.44     | - |
| chr3 | 2276100 | 2276145 | CSAR_peak_  | 8.65,12.13     | - |
| chr3 | 2276216 | 2276257 | CSAR_peak_  | 16.33,13.48    | - |

|      |         |         |            |               |   |
|------|---------|---------|------------|---------------|---|
| chr3 | 2276259 | 2276293 | CSAR_peak_ | 7.27          | - |
| chr3 | 2276794 | 2276950 | CSAR_peak_ | 6.21,18.61,1  | - |
| chr3 | 2277098 | 2277127 | CSAR_peak_ | 6.03,24.21    | - |
| chr3 | 2277183 | 2277216 | CSAR_peak_ | 7.27          | - |
| chr3 | 2277340 | 2277392 | CSAR_peak_ | 10.31,6.21    | - |
| chr3 | 2277665 | 2277713 | CSAR_peak_ | 8.65          | - |
| chr3 | 2277861 | 2277916 | CSAR_peak_ | 17.82         | - |
| chr3 | 2278129 | 2278168 | CSAR_peak_ | 8.65,15.2     | - |
| chr3 | 2278318 | 2278415 | CSAR_peak_ | 18.85,12.17   | - |
| chr3 | 2278543 | 2278706 | CSAR_peak_ | 14.93,9.61,1( | - |
| chr3 | 2278985 | 2279053 | CSAR_peak_ | 6.57,13.44    | - |
| chr3 | 2279185 | 2279242 | CSAR_peak_ | 23.95,14.92   | - |
| chr3 | 2279733 | 2279778 | CSAR_peak_ | 14.88         | - |
| chr3 | 2283647 | 2283685 | CSAR_peak_ | 12.13         | - |
| chr3 | 2283717 | 2283745 | CSAR_peak_ | 7.27          | - |
| chr3 | 2284061 | 2284100 | CSAR_peak_ | 17.51         | - |
| chr3 | 2284183 | 2284239 | CSAR_peak_ | 14.76         | - |
| chr3 | 2284396 | 2284439 | CSAR_peak_ | 31.2          | - |
| chr3 | 2284558 | 2284572 | CSAR_peak_ | 12.13         | - |
| chr3 | 2284807 | 2284855 | CSAR_peak_ | 12.17,7.27    | - |
| chr3 | 2296321 | 2296382 | CSAR_peak_ | 7.27,8.39     | - |
| chr3 | 2297463 | 2297491 | CSAR_peak_ | 12.13,8.89    | - |
| chr3 | 2297532 | 2297582 | CSAR_peak_ | 25.6,33.65,7. | - |
| chr3 | 2317620 | 2317791 | CSAR_peak_ | 28.34,14.88   | - |
| chr3 | 2318710 | 2318750 | CSAR_peak_ | 14.88,6.21    | - |
| chr3 | 2318775 | 2318803 | CSAR_peak_ | 6.02          | - |
| chr3 | 2318804 | 2319112 | CSAR_peak_ | 20.94,8.52,7. | - |
| chr3 | 2319259 | 2319480 | CSAR_peak_ | 38.71,44.69,! | - |
| chr3 | 2319572 | 2319603 | CSAR_peak_ | 6.02          | - |
| chr3 | 2319739 | 2319797 | CSAR_peak_ | 8.39          | - |
| chr3 | 2319827 | 2319918 | CSAR_peak_ | 7.27          | - |
| chr3 | 2320014 | 2320206 | CSAR_peak_ | 25.91,25.91   | - |
| chr3 | 2320229 | 2320282 | CSAR_peak_ | 9.97          | - |
| chr3 | 2320790 | 2320894 | CSAR_peak_ | 8.39          | - |
| chr3 | 2321028 | 2321104 | CSAR_peak_ | 17.82,9.58    | - |
| chr3 | 2325489 | 2325541 | CSAR_peak_ | 6.21          | - |
| chr3 | 2326091 | 2326207 | CSAR_peak_ | 16.33,8.39    | - |
| chr3 | 2327233 | 2327250 | CSAR_peak_ | 8.39          | - |
| chr3 | 2328112 | 2328326 | CSAR_peak_ | 6.44,14.88,9. | - |
| chr3 | 2328520 | 2328670 | CSAR_peak_ | 25.91,19.36   | - |
| chr3 | 2328779 | 2328843 | CSAR_peak_ | 9.58          | - |
| chr3 | 2329039 | 2329095 | CSAR_peak_ | 8.39          | - |



|      |         |         |            |                |   |
|------|---------|---------|------------|----------------|---|
| chr3 | 2329493 | 2329529 | CSAR_peak_ | 7.27,6.03      | - |
| chr3 | 2329541 | 2329606 | CSAR_peak_ | 10.02,10.02    | - |
| chr3 | 2332274 | 2332312 | CSAR_peak_ | 7.27           | - |
| chr3 | 2332761 | 2332824 | CSAR_peak_ | 12.13          | - |
| chr3 | 2365646 | 2365708 | CSAR_peak_ | 7.27           | - |
| chr3 | 2385147 | 2385193 | CSAR_peak_ | 7.27           | - |
| chr3 | 2385271 | 2385339 | CSAR_peak_ | 8.39           | - |
| chr3 | 2386778 | 2386841 | CSAR_peak_ | 10.83          | - |
| chr3 | 2387310 | 2387345 | CSAR_peak_ | 10.83          | - |
| chr3 | 2387874 | 2387950 | CSAR_peak_ | 11.96,12.31    | - |
| chr3 | 2388069 | 2388203 | CSAR_peak_ | 19.98,29.2     | - |
| chr3 | 2410083 | 2410219 | CSAR_peak_ | 13.48,6.21     | - |
| chr3 | 2410434 | 2410483 | CSAR_peak_ | 8.39           | - |
| chr3 | 2410927 | 2411069 | CSAR_peak_ | 12.5,6.85      | - |
| chr3 | 2411491 | 2411570 | CSAR_peak_ | 13.44          | - |
| chr3 | 2411659 | 2411705 | CSAR_peak_ | 7.27           | - |
| chr3 | 2411740 | 2411835 | CSAR_peak_ | 16.34,14.76    | - |
| chr3 | 2412556 | 2412617 | CSAR_peak_ | 17.37,14.08    | - |
| chr3 | 2412636 | 2412682 | CSAR_peak_ | 6.21           | - |
| chr3 | 2445510 | 2445560 | CSAR_peak_ | 14.88          | - |
| chr3 | 2459717 | 2459770 | CSAR_peak_ | 14.88          | - |
| chr3 | 2459939 | 2460054 | CSAR_peak_ | 18.85,20.43    | - |
| chr3 | 2460344 | 2460409 | CSAR_peak_ | 12.13,7.27     | - |
| chr3 | 2461223 | 2461304 | CSAR_peak_ | 6.21,9.58      | - |
| chr3 | 2461383 | 2461491 | CSAR_peak_ | 21.94,12.13    | - |
| chr3 | 2461535 | 2461612 | CSAR_peak_ | 16.33,12.13    | - |
| chr3 | 2461716 | 2461787 | CSAR_peak_ | 6.21           | - |
| chr3 | 2461875 | 2461969 | CSAR_peak_ | 9.58,10.83     | - |
| chr3 | 2461973 | 2462020 | CSAR_peak_ | 9.58           | - |
| chr3 | 2462051 | 2462139 | CSAR_peak_ | 10.83,25.91    | - |
| chr3 | 2462251 | 2462314 | CSAR_peak_ | 16.33,9.77     | - |
| chr3 | 2462586 | 2462598 | CSAR_peak_ | 12.13          | - |
| chr3 | 2462674 | 2462776 | CSAR_peak_ | 7.27,24.21,9.- | - |
| chr3 | 2463057 | 2463112 | CSAR_peak_ | 6.21           | - |
| chr3 | 2463234 | 2463258 | CSAR_peak_ | 6.21           | - |
| chr3 | 2472729 | 2472773 | CSAR_peak_ | 7.27           | - |
| chr3 | 2516700 | 2516774 | CSAR_peak_ | 7.92           | - |
| chr3 | 2518576 | 2518670 | CSAR_peak_ | 12.13,6.03     | - |
| chr3 | 2549195 | 2549262 | CSAR_peak_ | 7.58           | - |
| chr3 | 2558065 | 2558106 | CSAR_peak_ | 7.27           | - |
| chr3 | 2558789 | 2558826 | CSAR_peak_ | 6.21           | - |
| chr3 | 2567350 | 2567408 | CSAR_peak_ | 12.17          | - |

|      |         |         |            |                |   |
|------|---------|---------|------------|----------------|---|
| chr3 | 2568364 | 2568403 | CSAR_peak_ | 8.39           | - |
| chr3 | 2582419 | 2582590 | CSAR_peak_ | 24.21,9.27     | - |
| chr3 | 2582615 | 2582692 | CSAR_peak_ | 12.13,6.21     | - |
| chr3 | 2582700 | 2582818 | CSAR_peak_ | 9.84,6.94,9.5  | - |
| chr3 | 2582870 | 2582957 | CSAR_peak_ | 23.49,33.03    | - |
| chr3 | 2583030 | 2583129 | CSAR_peak_ | 10.31,6.21     | - |
| chr3 | 2583237 | 2583317 | CSAR_peak_ | 18.35          | - |
| chr3 | 2583497 | 2583580 | CSAR_peak_ | 10.96,8.13,9.  | - |
| chr3 | 2583701 | 2583892 | CSAR_peak_ | 39.3,19.93,1.  | - |
| chr3 | 2583941 | 2584119 | CSAR_peak_ | 17.51,18.95    | - |
| chr3 | 2584328 | 2584419 | CSAR_peak_ | 6.21           | - |
| chr3 | 2584544 | 2584584 | CSAR_peak_ | 7.27           | - |
| chr3 | 2584614 | 2584681 | CSAR_peak_ | 22.56          | - |
| chr3 | 2584984 | 2585075 | CSAR_peak_ | 8.39,8.28      | - |
| chr3 | 2585090 | 2585153 | CSAR_peak_ | 9.58           | - |
| chr3 | 2585452 | 2585560 | CSAR_peak_ | 13.48          | - |
| chr3 | 2587094 | 2587144 | CSAR_peak_ | 12.17          | - |
| chr3 | 2587425 | 2587536 | CSAR_peak_ | 11.99,46.67    | - |
| chr3 | 2587649 | 2587772 | CSAR_peak_ | 7.73,6.78,12.  | - |
| chr3 | 2587777 | 2587835 | CSAR_peak_ | 5.86           | - |
| chr3 | 2587888 | 2588135 | CSAR_peak_ | 13.09,17.82,1. | - |
| chr3 | 2588176 | 2588266 | CSAR_peak_ | 17.4,16.34     | - |
| chr3 | 2588431 | 2588486 | CSAR_peak_ | 9.58           | - |
| chr3 | 2588488 | 2588574 | CSAR_peak_ | 12.17,9.77     | - |
| chr3 | 2588813 | 2588894 | CSAR_peak_ | 7.27,11.38     | - |
| chr3 | 2589050 | 2589143 | CSAR_peak_ | 16.54          | - |
| chr3 | 2589504 | 2589637 | CSAR_peak_ | 16.11,24.21    | - |
| chr3 | 2589949 | 2590005 | CSAR_peak_ | 16.11          | - |
| chr3 | 2590130 | 2590257 | CSAR_peak_ | 18.73,12.17    | - |
| chr3 | 2590463 | 2590524 | CSAR_peak_ | 12.13          | - |
| chr3 | 2590556 | 2590644 | CSAR_peak_ | 10.31,24.52    | - |
| chr3 | 2590711 | 2590757 | CSAR_peak_ | 12.17,20.43    | - |
| chr3 | 2590770 | 2590949 | CSAR_peak_ | 14.88,9.77,1.  | - |
| chr3 | 2591137 | 2591170 | CSAR_peak_ | 12.13          | - |
| chr3 | 2591226 | 2591296 | CSAR_peak_ | 12.35,20.13    | - |
| chr3 | 2591301 | 2591316 | CSAR_peak_ | 7.27           | - |
| chr3 | 2591388 | 2591451 | CSAR_peak_ | 8.39           | - |
| chr3 | 2591652 | 2591709 | CSAR_peak_ | 10.83          | - |
| chr3 | 2591797 | 2591852 | CSAR_peak_ | 12.13          | - |
| chr3 | 2592063 | 2592093 | CSAR_peak_ | 8.39           | - |
| chr3 | 2592484 | 2592521 | CSAR_peak_ | 14.88          | - |
| chr3 | 2592625 | 2592740 | CSAR_peak_ | 10.7,6.78,13.  | - |

|      |         |         |            |                |   |
|------|---------|---------|------------|----------------|---|
| chr3 | 2592940 | 2593028 | CSAR_peak_ | 7.27,6.64      | - |
| chr3 | 2593465 | 2593530 | CSAR_peak_ | 11.14          | - |
| chr3 | 2594015 | 2594114 | CSAR_peak_ | 17.82          | - |
| chr3 | 2594216 | 2594265 | CSAR_peak_ | 8.5            | - |
| chr3 | 2594310 | 2594344 | CSAR_peak_ | 8.39,10.83     | - |
| chr3 | 2594419 | 2594498 | CSAR_peak_ | 14.93,9.58     | - |
| chr3 | 2594615 | 2594704 | CSAR_peak_ | 8.28,17.82,7.  | - |
| chr3 | 2594810 | 2594859 | CSAR_peak_ | 19.36,14.88    | - |
| chr3 | 2594877 | 2594983 | CSAR_peak_ | 10.95,18.95    | - |
| chr3 | 2605696 | 2605756 | CSAR_peak_ | 7.29           | - |
| chr3 | 2605865 | 2605933 | CSAR_peak_ | 6.1,7.11       | - |
| chr3 | 2606104 | 2606172 | CSAR_peak_ | 20.94,6.21     | - |
| chr3 | 2606296 | 2606347 | CSAR_peak_ | 6.21           | - |
| chr3 | 2606368 | 2606453 | CSAR_peak_ | 13.6,6.03      | - |
| chr3 | 2606597 | 2606606 | CSAR_peak_ | 6.03           | - |
| chr3 | 2606620 | 2606776 | CSAR_peak_ | 11.38,11.66    | - |
| chr3 | 2606891 | 2606979 | CSAR_peak_ | 8.65,20.43     | - |
| chr3 | 2607040 | 2607133 | CSAR_peak_ | 12.13,24.52,.- | - |
| chr3 | 2609566 | 2609594 | CSAR_peak_ | 10.83          | - |
| chr3 | 2609896 | 2609942 | CSAR_peak_ | 7.27,14.88     | - |
| chr3 | 2610283 | 2610321 | CSAR_peak_ | 6.44           | - |
| chr3 | 2610412 | 2610461 | CSAR_peak_ | 9.77,7.58      | - |
| chr3 | 2616728 | 2616773 | CSAR_peak_ | 7.58           | - |
| chr3 | 2648752 | 2648812 | CSAR_peak_ | 9.58           | - |
| chr3 | 2648872 | 2648943 | CSAR_peak_ | 7              | - |
| chr3 | 2649076 | 2649149 | CSAR_peak_ | 12.31          | - |
| chr3 | 2649232 | 2649364 | CSAR_peak_ | 6.81,19.36,6.- | - |
| chr3 | 2649502 | 2649603 | CSAR_peak_ | 9.58,14.88     | - |
| chr3 | 2649833 | 2649944 | CSAR_peak_ | 10.95,17.82    | - |
| chr3 | 2651708 | 2651820 | CSAR_peak_ | 17.82          | - |
| chr3 | 2651831 | 2651860 | CSAR_peak_ | 9.48           | - |
| chr3 | 2651862 | 2651907 | CSAR_peak_ | 20.43,7.27     | - |
| chr3 | 2652256 | 2652352 | CSAR_peak_ | 12.27,10.18    | - |
| chr3 | 2652393 | 2652446 | CSAR_peak_ | 13.48,9.58     | - |
| chr3 | 2652836 | 2652894 | CSAR_peak_ | 12.13          | - |
| chr3 | 2658174 | 2658212 | CSAR_peak_ | 7.58           | - |
| chr3 | 2658332 | 2658390 | CSAR_peak_ | 8.28           | - |
| chr3 | 2658431 | 2658487 | CSAR_peak_ | 13.48          | - |
| chr3 | 2658609 | 2658675 | CSAR_peak_ | 6.21           | - |
| chr3 | 2658804 | 2658888 | CSAR_peak_ | 10.83          | - |
| chr3 | 2659010 | 2659085 | CSAR_peak_ | 22.56          | - |
| chr3 | 2659091 | 2659160 | CSAR_peak_ | 11.63,19.36    | - |

|      |         |         |            |             |   |
|------|---------|---------|------------|-------------|---|
| chr3 | 2659190 | 2659237 | CSAR_peak_ | 6.21        | - |
| chr3 | 2659341 | 2659383 | CSAR_peak_ | 7.27        | - |
| chr3 | 2659663 | 2659752 | CSAR_peak_ | 9.58,7.27   | - |
| chr3 | 2659755 | 2659818 | CSAR_peak_ | 8.39,26.69  | - |
| chr3 | 2659963 | 2660081 | CSAR_peak_ | 12.17,17.82 | - |
| chr3 | 2666664 | 2666733 | CSAR_peak_ | 6.81        | - |
| chr3 | 2680119 | 2680166 | CSAR_peak_ | 6.21        | - |
| chr3 | 2681434 | 2681472 | CSAR_peak_ | 7.27        | - |
| chr3 | 2681609 | 2681671 | CSAR_peak_ | 9.58        | - |
| chr3 | 2682036 | 2682092 | CSAR_peak_ | 6.03        | - |
| chr3 | 2683819 | 2683887 | CSAR_peak_ | 7.27,7.27   | - |
| chr3 | 2684264 | 2684320 | CSAR_peak_ | 6.21        | - |
| chr3 | 2684543 | 2684619 | CSAR_peak_ | 6.21        | - |
| chr3 | 2684725 | 2684803 | CSAR_peak_ | 13.48,6.21  | - |
| chr3 | 2685195 | 2685233 | CSAR_peak_ | 9.58        | - |
| chr3 | 2685315 | 2685358 | CSAR_peak_ | 12.13       | - |
| chr3 | 2685911 | 2685984 | CSAR_peak_ | 7.27,7.27   | - |
| chr3 | 2686004 | 2686061 | CSAR_peak_ | 9.58        | - |
| chr3 | 2686067 | 2686127 | CSAR_peak_ | 5.9         | - |
| chr3 | 2687493 | 2687568 | CSAR_peak_ | 17.82,6.21  | - |
| chr3 | 2687686 | 2687772 | CSAR_peak_ | 24.21,7.27  | - |
| chr3 | 2687992 | 2688094 | CSAR_peak_ | 12.6,13.48  | - |
| chr3 | 2688196 | 2688264 | CSAR_peak_ | 6.21,9.58   | - |
| chr3 | 2688563 | 2688578 | CSAR_peak_ | 16.08       | - |
| chr3 | 2688809 | 2688861 | CSAR_peak_ | 20.18       | - |
| chr3 | 2688875 | 2688929 | CSAR_peak_ | 7.27,8.13   | - |
| chr3 | 2689176 | 2689217 | CSAR_peak_ | 7.58        | - |
| chr3 | 2690018 | 2690055 | CSAR_peak_ | 8.39        | - |
| chr3 | 2690463 | 2690523 | CSAR_peak_ | 12.31,12.17 | - |
| chr3 | 2690545 | 2690591 | CSAR_peak_ | 7.68        | - |
| chr3 | 2691424 | 2691510 | CSAR_peak_ | 7.27        | - |
| chr3 | 2691630 | 2691714 | CSAR_peak_ | 12.17       | - |
| chr3 | 2691932 | 2692003 | CSAR_peak_ | 8.39        | - |
| chr3 | 2692335 | 2692362 | CSAR_peak_ | 6.03        | - |
| chr3 | 2692508 | 2692560 | CSAR_peak_ | 19.98       | - |
| chr3 | 2692597 | 2692643 | CSAR_peak_ | 10.02       | - |
| chr3 | 2693500 | 2693546 | CSAR_peak_ | 7.27        | - |
| chr3 | 2693769 | 2693838 | CSAR_peak_ | 7.27        | - |
| chr3 | 2693942 | 2693995 | CSAR_peak_ | 33.03,14.88 | - |
| chr3 | 2694136 | 2694239 | CSAR_peak_ | 9.58,9.58   | - |
| chr3 | 2698336 | 2698390 | CSAR_peak_ | 24.21       | - |
| chr3 | 2730483 | 2730567 | CSAR_peak_ | 17.82,6.21  | - |

|      |         |         |            |                |   |
|------|---------|---------|------------|----------------|---|
| chr3 | 2733146 | 2733208 | CSAR_peak_ | 7.27           | - |
| chr3 | 2734751 | 2734803 | CSAR_peak_ | 7.58           | - |
| chr3 | 2735835 | 2735885 | CSAR_peak_ | 7.27           | - |
| chr3 | 2736254 | 2736295 | CSAR_peak_ | 24.21          | - |
| chr3 | 2736428 | 2736474 | CSAR_peak_ | 19.36,7.58     | - |
| chr3 | 2783313 | 2783372 | CSAR_peak_ | 6.21           | - |
| chr3 | 2783790 | 2783857 | CSAR_peak_ | 10.83          | - |
| chr3 | 2785403 | 2785438 | CSAR_peak_ | 8.65           | - |
| chr3 | 2785563 | 2785601 | CSAR_peak_ | 6.21           | - |
| chr3 | 2785647 | 2785728 | CSAR_peak_ | 10.02,5.86,8.  | - |
| chr3 | 2788275 | 2788323 | CSAR_peak_ | 7.27           | - |
| chr3 | 2788749 | 2788778 | CSAR_peak_ | 6.02           | - |
| chr3 | 2788806 | 2788856 | CSAR_peak_ | 7.27           | - |
| chr3 | 2788964 | 2788990 | CSAR_peak_ | 8.39           | - |
| chr3 | 2790238 | 2790281 | CSAR_peak_ | 9.58           | - |
| chr3 | 2790289 | 2790452 | CSAR_peak_ | 23.49,12.13    | - |
| chr3 | 2791262 | 2791314 | CSAR_peak_ | 8.39           | - |
| chr3 | 2791822 | 2791873 | CSAR_peak_ | 10.83          | - |
| chr3 | 2792785 | 2792834 | CSAR_peak_ | 12.94,12.6     | - |
| chr3 | 2792849 | 2792928 | CSAR_peak_ | 9.58,9.58      | - |
| chr3 | 2793171 | 2793205 | CSAR_peak_ | 6.21           | - |
| chr3 | 2806279 | 2806331 | CSAR_peak_ | 6.21           | - |
| chr3 | 2806446 | 2806498 | CSAR_peak_ | 9.58           | - |
| chr3 | 2823279 | 2823338 | CSAR_peak_ | 9.58           | - |
| chr3 | 2823609 | 2823676 | CSAR_peak_ | 9.77           | - |
| chr3 | 2823678 | 2823711 | CSAR_peak_ | 6.21           | - |
| chr3 | 2824778 | 2824946 | CSAR_peak_ | 10.31,7.27,10. | - |
| chr3 | 2826546 | 2826619 | CSAR_peak_ | 8.39           | - |
| chr3 | 2827722 | 2827791 | CSAR_peak_ | 9.58           | - |
| chr3 | 2827879 | 2827929 | CSAR_peak_ | 10.83          | - |
| chr3 | 2828452 | 2828506 | CSAR_peak_ | 7.58           | - |
| chr3 | 2828583 | 2828640 | CSAR_peak_ | 6.21           | - |
| chr3 | 2828820 | 2828871 | CSAR_peak_ | 9.58           | - |
| chr3 | 2829470 | 2829567 | CSAR_peak_ | 8.39,8.14      | - |
| chr3 | 2829967 | 2830066 | CSAR_peak_ | 8.39,19.36,6.  | - |
| chr3 | 2833707 | 2833749 | CSAR_peak_ | 7.27           | - |
| chr3 | 2836022 | 2836102 | CSAR_peak_ | 8.52,6.57      | - |
| chr3 | 2836226 | 2836249 | CSAR_peak_ | 7.27           | - |
| chr3 | 2837763 | 2837821 | CSAR_peak_ | 6.21           | - |
| chr3 | 2839124 | 2839225 | CSAR_peak_ | 10.83          | - |
| chr3 | 2839373 | 2839446 | CSAR_peak_ | 6.21           | - |
| chr3 | 2839495 | 2839659 | CSAR_peak_ | 12.13,12.13    | - |

|      |         |         |            |               |   |
|------|---------|---------|------------|---------------|---|
| chr3 | 2839918 | 2839972 | CSAR_peak_ | 19.36,10.02   | - |
| chr3 | 2840607 | 2840645 | CSAR_peak_ | 9.77          | - |
| chr3 | 2840659 | 2842102 | CSAR_peak_ | 22.32,14.08,  | - |
| chr3 | 2842104 | 2842453 | CSAR_peak_ | 39.76,8.65,2  | - |
| chr3 | 2842466 | 2842557 | CSAR_peak_ | 30.13,11.03,  | - |
| chr3 | 2842604 | 2842680 | CSAR_peak_ | 37.04,29.4,1  | - |
| chr3 | 2842692 | 2842832 | CSAR_peak_ | 43.74,9.31,2  | - |
| chr3 | 2842936 | 2843009 | CSAR_peak_ | 22.1,24.22    | - |
| chr3 | 2843022 | 2843246 | CSAR_peak_ | 38.84,5.86,1  | - |
| chr3 | 2843457 | 2843688 | CSAR_peak_ | 30.81,7.27,5  | - |
| chr3 | 2848555 | 2848658 | CSAR_peak_ | 9.58          | - |
| chr3 | 2848903 | 2849031 | CSAR_peak_ | 9.58,5.86,6.0 | - |
| chr3 | 2849198 | 2849239 | CSAR_peak_ | 6.21          | - |
| chr3 | 2889617 | 2889667 | CSAR_peak_ | 9.58          | - |
| chr3 | 2889773 | 2889856 | CSAR_peak_ | 8.75,9.77     | - |
| chr3 | 2889875 | 2889999 | CSAR_peak_ | 31.48,13.69,  | - |
| chr3 | 2890003 | 2890062 | CSAR_peak_ | 6.03,17.82    | - |
| chr3 | 2890094 | 2890216 | CSAR_peak_ | 22.09,54.54,  | - |
| chr3 | 2890330 | 2890390 | CSAR_peak_ | 10.83         | - |
| chr3 | 2895706 | 2895754 | CSAR_peak_ | 6.21          | - |
| chr3 | 2895870 | 2895954 | CSAR_peak_ | 7.58,16.11    | - |
| chr3 | 2896630 | 2896692 | CSAR_peak_ | 7.27,7.27     | - |
| chr3 | 2897880 | 2897950 | CSAR_peak_ | 17.82,9.58    | - |
| chr3 | 2898299 | 2898371 | CSAR_peak_ | 9.58          | - |
| chr3 | 2898823 | 2898893 | CSAR_peak_ | 12.13,13.51   | - |
| chr3 | 2899033 | 2899089 | CSAR_peak_ | 10.83,14.88   | - |
| chr3 | 2899214 | 2899334 | CSAR_peak_ | 8.02,6.21     | - |
| chr3 | 2899403 | 2899411 | CSAR_peak_ | 7.92          | - |
| chr3 | 2900206 | 2900286 | CSAR_peak_ | 7.27,5.86     | - |
| chr3 | 2900636 | 2900686 | CSAR_peak_ | 14.76,7.27    | - |
| chr3 | 2903649 | 2903732 | CSAR_peak_ | 6.44,12.31    | - |
| chr3 | 2903802 | 2903836 | CSAR_peak_ | 7.27          | - |
| chr3 | 2935937 | 2935996 | CSAR_peak_ | 12.17         | - |
| chr3 | 2936915 | 2936984 | CSAR_peak_ | 7.27          | - |
| chr3 | 2937206 | 2937285 | CSAR_peak_ | 14.76         | - |
| chr3 | 2978104 | 2978152 | CSAR_peak_ | 7.27          | - |
| chr3 | 2986991 | 2987029 | CSAR_peak_ | 8.39          | - |
| chr3 | 2996423 | 2996479 | CSAR_peak_ | 14.88         | - |
| chr3 | 2996869 | 2996921 | CSAR_peak_ | 5.86          | - |
| chr3 | 2996969 | 2997013 | CSAR_peak_ | 7.27          | - |
| chr3 | 3024651 | 3024702 | CSAR_peak_ | 6.21          | - |
| chr3 | 3037066 | 3037122 | CSAR_peak_ | 13.48         | - |

|      |         |         |            |                   |   |
|------|---------|---------|------------|-------------------|---|
| chr3 | 3056688 | 3056761 | CSAR_peak_ | 16.77,11.38       | - |
| chr3 | 3057029 | 3057084 | CSAR_peak_ | 14.88             | - |
| chr3 | 3057129 | 3057170 | CSAR_peak_ | 6.81              | - |
| chr3 | 3057184 | 3057253 | CSAR_peak_ | 13.47,9.58        | - |
| chr3 | 3057265 | 3057399 | CSAR_peak_ | 16.33,8.99        | - |
| chr3 | 3057457 | 3057533 | CSAR_peak_ | 12.17,8.14,11.14  | - |
| chr3 | 3057572 | 3057751 | CSAR_peak_ | 49.16,5.86,11.14  | - |
| chr3 | 3057757 | 3057812 | CSAR_peak_ | 9.77,9.58         | - |
| chr3 | 3057840 | 3057959 | CSAR_peak_ | 23.65,8.14,8.14   | - |
| chr3 | 3057995 | 3058087 | CSAR_peak_ | 7.89,7.92,8.61    | - |
| chr3 | 3058156 | 3058295 | CSAR_peak_ | 8.39,7.27,5.81    | - |
| chr3 | 3058433 | 3058587 | CSAR_peak_ | 9.58,26.06        | - |
| chr3 | 3059035 | 3059118 | CSAR_peak_ | 12.92,16.88       | - |
| chr3 | 3085007 | 3085044 | CSAR_peak_ | 7.27              | - |
| chr3 | 3090855 | 3090902 | CSAR_peak_ | 14.88             | - |
| chr3 | 3091208 | 3091259 | CSAR_peak_ | 7.51              | - |
| chr3 | 3091271 | 3091480 | CSAR_peak_ | 8.65,11.07,11.14  | - |
| chr3 | 3091501 | 3091683 | CSAR_peak_ | 17.37,18.73,11.14 | - |
| chr3 | 3093631 | 3093667 | CSAR_peak_ | 7.27              | - |
| chr3 | 3104288 | 3104339 | CSAR_peak_ | 8.39              | - |
| chr3 | 3119726 | 3119773 | CSAR_peak_ | 7.27              | - |
| chr3 | 3140085 | 3140147 | CSAR_peak_ | 10.02,12.31       | - |
| chr3 | 3143518 | 3143576 | CSAR_peak_ | 10.83             | - |
| chr3 | 3168596 | 3168683 | CSAR_peak_ | 9.58,7.27         | - |
| chr3 | 3169763 | 3169800 | CSAR_peak_ | 9.58              | - |
| chr3 | 3171503 | 3171599 | CSAR_peak_ | 6.21,11.96        | - |
| chr3 | 3171675 | 3171716 | CSAR_peak_ | 9.58,7.27         | - |
| chr3 | 3171728 | 3171745 | CSAR_peak_ | 7.27              | - |
| chr3 | 3171847 | 3171966 | CSAR_peak_ | 22.56,6.1,14.14   | - |
| chr3 | 3172032 | 3172142 | CSAR_peak_ | 12.13,25.91       | - |
| chr3 | 3172189 | 3172258 | CSAR_peak_ | 8.39,10.83        | - |
| chr3 | 3172290 | 3172417 | CSAR_peak_ | 18.65,24.21       | - |
| chr3 | 3172494 | 3172539 | CSAR_peak_ | 14.88,6.57        | - |
| chr3 | 3177954 | 3177975 | CSAR_peak_ | 6.21              | - |
| chr3 | 3212737 | 3212794 | CSAR_peak_ | 8.39              | - |
| chr3 | 3214452 | 3214519 | CSAR_peak_ | 16.33             | - |
| chr3 | 3218660 | 3218705 | CSAR_peak_ | 7.27              | - |
| chr3 | 3219735 | 3219772 | CSAR_peak_ | 6.21              | - |
| chr3 | 3220011 | 3220065 | CSAR_peak_ | 7                 | - |
| chr3 | 3220120 | 3220170 | CSAR_peak_ | 7.27              | - |
| chr3 | 3220273 | 3220369 | CSAR_peak_ | 20.18,17.82       | - |
| chr3 | 3220444 | 3220519 | CSAR_peak_ | 11.63,17.82       | - |

|      |         |         |            |                |   |
|------|---------|---------|------------|----------------|---|
| chr3 | 3220646 | 3220662 | CSAR_peak_ | 12.13          | - |
| chr3 | 3220687 | 3220748 | CSAR_peak_ | 8.14           | - |
| chr3 | 3220778 | 3220834 | CSAR_peak_ | 5.86,6.21      | - |
| chr3 | 3221029 | 3221087 | CSAR_peak_ | 7.89           | - |
| chr3 | 3221096 | 3221137 | CSAR_peak_ | 10.13          | - |
| chr3 | 3221205 | 3221244 | CSAR_peak_ | 6.57           | - |
| chr3 | 3221345 | 3221377 | CSAR_peak_ | 6.57,12.13     | - |
| chr3 | 3221759 | 3221801 | CSAR_peak_ | 7.58           | - |
| chr3 | 3221805 | 3221845 | CSAR_peak_ | 16.33          | - |
| chr3 | 3221924 | 3222078 | CSAR_peak_ | 24.21          | - |
| chr3 | 3222082 | 3222124 | CSAR_peak_ | 10.83          | - |
| chr3 | 3222868 | 3223006 | CSAR_peak_ | 9.77,18.73     | - |
| chr3 | 3223340 | 3223447 | CSAR_peak_ | 14.76,12.12    | - |
| chr3 | 3223808 | 3223915 | CSAR_peak_ | 10.02          | - |
| chr3 | 3223986 | 3224028 | CSAR_peak_ | 10.31,5.86     | - |
| chr3 | 3224317 | 3224364 | CSAR_peak_ | 7.27           | - |
| chr3 | 3224375 | 3224426 | CSAR_peak_ | 19.36          | - |
| chr3 | 3224503 | 3224554 | CSAR_peak_ | 25.91,17.37,1- | - |
| chr3 | 3224741 | 3224868 | CSAR_peak_ | 31.73,17.4     | - |
| chr3 | 3225090 | 3225226 | CSAR_peak_ | 9.61,14.76     | - |
| chr3 | 3225688 | 3225718 | CSAR_peak_ | 7.27           | - |
| chr3 | 3225874 | 3225940 | CSAR_peak_ | 10.53,38.23    | - |
| chr3 | 3226344 | 3226517 | CSAR_peak_ | 6.21,20.94,7.- | - |
| chr3 | 3226996 | 3227050 | CSAR_peak_ | 16.33          | - |
| chr3 | 3227080 | 3227101 | CSAR_peak_ | 6.21           | - |
| chr3 | 3227316 | 3227386 | CSAR_peak_ | 25.07,11.38    | - |
| chr3 | 3227851 | 3227975 | CSAR_peak_ | 17.82,8.39     | - |
| chr3 | 3228005 | 3228014 | CSAR_peak_ | 13.48          | - |
| chr3 | 3228310 | 3228386 | CSAR_peak_ | 33.03,31.2,6.- | - |
| chr3 | 3228760 | 3228829 | CSAR_peak_ | 16.25,10.31    | - |
| chr3 | 3234422 | 3234516 | CSAR_peak_ | 16.33,10.95    | - |
| chr3 | 3234596 | 3234638 | CSAR_peak_ | 10.83          | - |
| chr3 | 3235571 | 3235622 | CSAR_peak_ | 7.27           | - |
| chr3 | 3235780 | 3235852 | CSAR_peak_ | 13.48          | - |
| chr3 | 3238397 | 3238450 | CSAR_peak_ | 9.77,17.82     | - |
| chr3 | 3293349 | 3293399 | CSAR_peak_ | 9.58           | - |
| chr3 | 3293780 | 3293824 | CSAR_peak_ | 8.39           | - |
| chr3 | 3294312 | 3294351 | CSAR_peak_ | 6.21           | - |
| chr3 | 3295509 | 3295551 | CSAR_peak_ | 7.27           | - |
| chr3 | 3296465 | 3296532 | CSAR_peak_ | 8.39           | - |
| chr3 | 3296801 | 3296863 | CSAR_peak_ | 10.83          | - |
| chr3 | 3323648 | 3323792 | CSAR_peak_ | 13.48          | - |



|      |         |         |            |               |   |
|------|---------|---------|------------|---------------|---|
| chr3 | 3323899 | 3323951 | CSAR_peak_ | 8.39          | - |
| chr3 | 3323967 | 3324009 | CSAR_peak_ | 14.85,12.17   | - |
| chr3 | 3324109 | 3324124 | CSAR_peak_ | 13.48         | - |
| chr3 | 3324137 | 3324186 | CSAR_peak_ | 9.58,9.77     | - |
| chr3 | 3324260 | 3324353 | CSAR_peak_ | 12.13,6.21    | - |
| chr3 | 3329326 | 3329366 | CSAR_peak_ | 7.27          | - |
| chr3 | 3329483 | 3329517 | CSAR_peak_ | 6.21          | - |
| chr3 | 3329977 | 3330023 | CSAR_peak_ | 6.21,9.58     | - |
| chr3 | 3330126 | 3330186 | CSAR_peak_ | 7.27,13.44    | - |
| chr3 | 3330504 | 3330550 | CSAR_peak_ | 10.83         | - |
| chr3 | 3330753 | 3330825 | CSAR_peak_ | 7.27,9.58     | - |
| chr3 | 3347980 | 3348009 | CSAR_peak_ | 7.27          | - |
| chr3 | 3354738 | 3354918 | CSAR_peak_ | 7.58,8.39,14. | - |
| chr3 | 3355002 | 3355148 | CSAR_peak_ | 10.83,26.05   | - |
| chr3 | 3355392 | 3355432 | CSAR_peak_ | 10.83         | - |
| chr3 | 3355441 | 3355528 | CSAR_peak_ | 6.03          | - |
| chr3 | 3355652 | 3355730 | CSAR_peak_ | 9.77,12.13    | - |
| chr3 | 3355928 | 3356018 | CSAR_peak_ | 18.73,7.58    | - |
| chr3 | 3356781 | 3356834 | CSAR_peak_ | 17.82,12.13   | - |
| chr3 | 3357091 | 3357201 | CSAR_peak_ | 7.27,9.77     | - |
| chr3 | 3358774 | 3358864 | CSAR_peak_ | 7.27,12.13    | - |
| chr3 | 3359200 | 3359258 | CSAR_peak_ | 9.58          | - |
| chr3 | 3359687 | 3359786 | CSAR_peak_ | 12.13,10.83   | - |
| chr3 | 3359942 | 3359988 | CSAR_peak_ | 7.27          | - |
| chr3 | 3359994 | 3360092 | CSAR_peak_ | 14.88,6.81,1. | - |
| chr3 | 3361320 | 3361441 | CSAR_peak_ | 42.87,21.56   | - |
| chr3 | 3361470 | 3361535 | CSAR_peak_ | 11.96,19.36   | - |
| chr3 | 3361896 | 3361926 | CSAR_peak_ | 7.27          | - |
| chr3 | 3362483 | 3362560 | CSAR_peak_ | 26.69,9.97,1. | - |
| chr3 | 3362676 | 3362724 | CSAR_peak_ | 7.27          | - |
| chr3 | 3362820 | 3362865 | CSAR_peak_ | 6.57          | - |
| chr3 | 3362955 | 3363050 | CSAR_peak_ | 6.74,8.3      | - |
| chr3 | 3363422 | 3363467 | CSAR_peak_ | 7.27,9.58     | - |
| chr3 | 3363718 | 3363784 | CSAR_peak_ | 9.58          | - |
| chr3 | 3363904 | 3363953 | CSAR_peak_ | 12.74         | - |
| chr3 | 3364231 | 3364286 | CSAR_peak_ | 16.08,6.03    | - |
| chr3 | 3364379 | 3364468 | CSAR_peak_ | 6.21,17.82    | - |
| chr3 | 3370380 | 3370455 | CSAR_peak_ | 14.88         | - |
| chr3 | 3372915 | 3372984 | CSAR_peak_ | 11.38,9.77    | - |
| chr3 | 3373030 | 3373084 | CSAR_peak_ | 7.27          | - |
| chr3 | 3373278 | 3373320 | CSAR_peak_ | 7.27          | - |
| chr3 | 3398792 | 3398852 | CSAR_peak_ | 7.27          | - |

|      |         |         |            |                |   |
|------|---------|---------|------------|----------------|---|
| chr3 | 3399281 | 3399377 | CSAR_peak_ | 14.88,17.82    | - |
| chr3 | 3417133 | 3417230 | CSAR_peak_ | 14.88,13.85    | - |
| chr3 | 3417238 | 3417289 | CSAR_peak_ | 7.92           | - |
| chr3 | 3433579 | 3433633 | CSAR_peak_ | 7.27           | - |
| chr3 | 3433942 | 3433985 | CSAR_peak_ | 7.27           | - |
| chr3 | 3434922 | 3434970 | CSAR_peak_ | 12.13,6.21     | - |
| chr3 | 3435383 | 3435446 | CSAR_peak_ | 12.13          | - |
| chr3 | 3482377 | 3482416 | CSAR_peak_ | 6.21           | - |
| chr3 | 3482453 | 3482523 | CSAR_peak_ | 10.94,7.27     | - |
| chr3 | 3482827 | 3482839 | CSAR_peak_ | 7.27           | - |
| chr3 | 3482916 | 3482938 | CSAR_peak_ | 7.27           | - |
| chr3 | 3483046 | 3483128 | CSAR_peak_ | 24.21,25.91    | - |
| chr3 | 3483134 | 3483164 | CSAR_peak_ | 11.07          | - |
| chr3 | 3483170 | 3483224 | CSAR_peak_ | 8.39           | - |
| chr3 | 3483288 | 3483493 | CSAR_peak_ | 33.47,17.82    | - |
| chr3 | 3483577 | 3483620 | CSAR_peak_ | 14.88          | - |
| chr3 | 3483623 | 3483674 | CSAR_peak_ | 10.95,9.58     | - |
| chr3 | 3483847 | 3483902 | CSAR_peak_ | 9.77,22.56     | - |
| chr3 | 3483959 | 3483998 | CSAR_peak_ | 7.27           | - |
| chr3 | 3484084 | 3484117 | CSAR_peak_ | 6.03           | - |
| chr3 | 3484162 | 3484271 | CSAR_peak_ | 10.83,19.36    | - |
| chr3 | 3484289 | 3484356 | CSAR_peak_ | 17.68,11.14    | - |
| chr3 | 3484437 | 3484542 | CSAR_peak_ | 22.52,38.71    | - |
| chr3 | 3484582 | 3484673 | CSAR_peak_ | 12.13,9.58     | - |
| chr3 | 3484701 | 3484751 | CSAR_peak_ | 6.21           | - |
| chr3 | 3484989 | 3485046 | CSAR_peak_ | 17.82          | - |
| chr3 | 3485070 | 3485130 | CSAR_peak_ | 7.27           | - |
| chr3 | 3485358 | 3485468 | CSAR_peak_ | 14.08,10.33    | - |
| chr3 | 3485527 | 3485661 | CSAR_peak_ | 20.76,8.13,3(- | - |
| chr3 | 3485787 | 3485806 | CSAR_peak_ | 8.14,7.58,7.5- | - |
| chr3 | 3485890 | 3485936 | CSAR_peak_ | 12.5,11.03     | - |
| chr3 | 3485962 | 3486005 | CSAR_peak_ | 6.21           | - |
| chr3 | 3486050 | 3486141 | CSAR_peak_ | 13.66,14.88    | - |
| chr3 | 3486162 | 3486218 | CSAR_peak_ | 9.77,9.72      | - |
| chr3 | 3486287 | 3486367 | CSAR_peak_ | 25.91,13.66    | - |
| chr3 | 3486453 | 3486585 | CSAR_peak_ | 24.52,20.18    | - |
| chr3 | 3486631 | 3486681 | CSAR_peak_ | 28.21,9.72     | - |
| chr3 | 3486696 | 3486743 | CSAR_peak_ | 7.58           | - |
| chr3 | 3486809 | 3486878 | CSAR_peak_ | 18.95,12.13    | - |
| chr3 | 3487085 | 3487110 | CSAR_peak_ | 7.27           | - |
| chr3 | 3487196 | 3487280 | CSAR_peak_ | 16.05,25.62    | - |
| chr3 | 3487446 | 3487466 | CSAR_peak_ | 9.58           | - |

|      |         |         |             |               |   |
|------|---------|---------|-------------|---------------|---|
| chr3 | 3487660 | 3487728 | CSAR_peak_  | 19.36,7.34    | - |
| chr3 | 3487827 | 3487890 | CSAR_peak_  | 9.48,14.92    | - |
| chr3 | 3487902 | 3487959 | CSAR_peak_  | 20.43,10.02   | - |
| chr3 | 3488023 | 3488163 | CSAR_peak_  | 14.88,46.82   | - |
| chr3 | 3488322 | 3488435 | CSAR_peak_  | 6.03,14.76,6. | - |
| chr3 | 3489219 | 3489275 | CSAR_peak_  | 14.88,6.03    | - |
| chr3 | 3489299 | 3489354 | CSAR_peak_  | 8.39          | - |
| chr3 | 3489681 | 3489739 | CSAR_peak_  | 24.21,7.27    | - |
| chr3 | 3489887 | 3489971 | CSAR_peak_  | 10.83,6.87    | - |
| chr3 | 3490070 | 3490133 | CSAR_peak_  | 12.74         | - |
| chr3 | 3490148 | 3490198 | CSAR_peak_  | 12.13,6.44    | - |
| chr3 | 3490276 | 3490355 | CSAR_peak_  | 8.09,25.91    | - |
| chr3 | 3490455 | 3490544 | CSAR_peak_  | 14.88,6.21    | - |
| chr3 | 3491083 | 3491152 | CSAR_peak_  | 21.94,9.41    | - |
| chr3 | 3491188 | 3491250 | CSAR_peak_  | 7.27,8.09     | - |
| chr3 | 3491623 | 3491679 | CSAR_peak_  | 17.82,12.13   | - |
| chr3 | 3508460 | 3508507 | CSAR_peak_  | 7.27          | - |
| chr3 | 3508727 | 3508800 | CSAR_peak_  | 9.58          | - |
| chr3 | 3515387 | 3515434 | CSAR_peak_  | 12.13,6.57    | - |
| chr3 | 3515438 | 3515462 | CSAR_peak_  | 10.02         | - |
| chr3 | 3515869 | 3515907 | CSAR_peak_  | 6.21          | - |
| chr3 | 3533848 | 3533865 | CSAR_peak_  | 7.27,6.21     | - |
| chr3 | 3533990 | 3534068 | CSAR_peak_  | 22.56,40.66,! | - |
| chr3 | 3534225 | 3534314 | CSAR_peak_  | 7.27          | - |
| chr3 | 3547957 | 3548021 | CSAR_peak_  | 6.21          | - |
| chr3 | 3583894 | 3583964 | CSAR_peak_  | 7.27          | - |
| chr3 | 3584224 | 3584336 | CSAR_peak_  | 6.94,12.13    | - |
| chr3 | 3584352 | 3584402 | CSAR_peak_  | 16.11,6.14    | - |
| chr3 | 3584431 | 3584508 | CSAR_peak_  | 40.72,22.52   | - |
| chr3 | 3584574 | 3584618 | CSAR_peak_  | 17.37,27.64   | - |
| chr3 | 3584645 | 3584848 | CSAR_peak_  | 38.71,5.86,1! | - |
| chr3 | 3584851 | 3584878 | CSAR_peak_  | 6.21          | - |
| chr3 | 3584892 | 3585073 | CSAR_peak_  | 15.96,17.82   | - |
| chr3 | 3585121 | 3585157 | CSAR_peak_! | 9.55          | - |
| chr3 | 3585206 | 3585354 | CSAR_peak_  | 82.89,17.82   | - |
| chr3 | 3585359 | 3585490 | CSAR_peak_  | 14.59,19.36,! | - |
| chr3 | 3585592 | 3585669 | CSAR_peak_  | 12.74,10.13   | - |
| chr3 | 3606007 | 3606051 | CSAR_peak_  | 7.27          | - |
| chr3 | 3606114 | 3606189 | CSAR_peak_  | 6.21          | - |
| chr3 | 3606496 | 3606620 | CSAR_peak_  | 9.58          | - |
| chr3 | 3623920 | 3623963 | CSAR_peak_  | 13.48         | - |
| chr3 | 3624523 | 3624568 | CSAR_peak_  | 7.34          | - |

|      |         |         |            |               |   |
|------|---------|---------|------------|---------------|---|
| chr3 | 3628022 | 3628120 | CSAR_peak_ | 41.79,9.55,1  | - |
| chr3 | 3628140 | 3628222 | CSAR_peak_ | 33.14,17.83,  | - |
| chr3 | 3671062 | 3671086 | CSAR_peak_ | 9.77          | - |
| chr3 | 3671196 | 3671225 | CSAR_peak_ | 24.21         | - |
| chr3 | 3671348 | 3671395 | CSAR_peak_ | 8.39          | - |
| chr3 | 3671534 | 3671549 | CSAR_peak_ | 6.03          | - |
| chr3 | 3671669 | 3671720 | CSAR_peak_ | 9.58          | - |
| chr3 | 3671722 | 3671773 | CSAR_peak_ | 6.21          | - |
| chr3 | 3684049 | 3684073 | CSAR_peak_ | 6.21          | - |
| chr3 | 3684087 | 3684205 | CSAR_peak_ | 9.58          | - |
| chr3 | 3702929 | 3702979 | CSAR_peak_ | 6.44          | - |
| chr3 | 3703013 | 3703059 | CSAR_peak_ | 10.95         | - |
| chr3 | 3703586 | 3703662 | CSAR_peak_ | 9.61          | - |
| chr3 | 3704686 | 3704728 | CSAR_peak_ | 7.27          | - |
| chr3 | 3704856 | 3704918 | CSAR_peak_ | 10.83         | - |
| chr3 | 3705324 | 3705358 | CSAR_peak_ | 5.86          | - |
| chr3 | 3705495 | 3705540 | CSAR_peak_ | 7.27          | - |
| chr3 | 3706155 | 3706198 | CSAR_peak_ | 6.21          | - |
| chr3 | 3706587 | 3706632 | CSAR_peak_ | 9.58          | - |
| chr3 | 3706981 | 3707018 | CSAR_peak_ | 22.56         | - |
| chr3 | 3707106 | 3707156 | CSAR_peak_ | 19.36         | - |
| chr3 | 3707503 | 3707575 | CSAR_peak_ | 12.13         | - |
| chr3 | 3707790 | 3707838 | CSAR_peak_ | 7.27          | - |
| chr3 | 3708000 | 3708073 | CSAR_peak_ | 7.27          | - |
| chr3 | 3723068 | 3723152 | CSAR_peak_ | 17.35,7.58    | - |
| chr3 | 3723176 | 3723232 | CSAR_peak_ | 8.39,6.21     | - |
| chr3 | 3723274 | 3723376 | CSAR_peak_ | 6.44,16.11    | - |
| chr3 | 3723410 | 3723473 | CSAR_peak_ | 10.83,7.27    | - |
| chr3 | 3723475 | 3723521 | CSAR_peak_ | 7.27          | - |
| chr3 | 3724311 | 3724381 | CSAR_peak_ | 14.88         | - |
| chr3 | 3724836 | 3724916 | CSAR_peak_ | 13.85,26.69   | - |
| chr3 | 3724942 | 3724992 | CSAR_peak_ | 7.78          | - |
| chr3 | 3725091 | 3725142 | CSAR_peak_ | 7.27,10.02    | - |
| chr3 | 3727832 | 3728030 | CSAR_peak_ | 12.59,7       | - |
| chr3 | 3728109 | 3728190 | CSAR_peak_ | 10.83         | - |
| chr3 | 3728217 | 3728260 | CSAR_peak_ | 8.39          | - |
| chr3 | 3728823 | 3728868 | CSAR_peak_ | 7.27          | - |
| chr3 | 3728970 | 3729021 | CSAR_peak_ | 7.27          | - |
| chr3 | 3729710 | 3729791 | CSAR_peak_ | 24.21,6.85    | - |
| chr3 | 3729839 | 3729942 | CSAR_peak_ | 7.7,10.83     | - |
| chr3 | 3729943 | 3730073 | CSAR_peak_ | 8.14,7.29,17. | - |
| chr3 | 3730101 | 3730190 | CSAR_peak_ | 9.58          | - |

|      |         |         |            |                |   |
|------|---------|---------|------------|----------------|---|
| chr3 | 3730295 | 3730430 | CSAR_peak_ | 30.02,22.56    | - |
| chr3 | 3730488 | 3730620 | CSAR_peak_ | 33.03,7.27     | - |
| chr3 | 3730738 | 3730794 | CSAR_peak_ | 9.58           | - |
| chr3 | 3737943 | 3737994 | CSAR_peak_ | 9.58           | - |
| chr3 | 3761697 | 3761752 | CSAR_peak_ | 6.21,8.14      | - |
| chr3 | 3761767 | 3761808 | CSAR_peak_ | 12.27          | - |
| chr3 | 3761879 | 3761921 | CSAR_peak_ | 8.95,6.1       | - |
| chr3 | 3761926 | 3761977 | CSAR_peak_ | 6.44           | - |
| chr3 | 3762046 | 3762114 | CSAR_peak_ | 8.28,8.39      | - |
| chr3 | 3762258 | 3762336 | CSAR_peak_ | 5.86,9.58      | - |
| chr3 | 3762446 | 3762521 | CSAR_peak_ | 7.27,6.21      | - |
| chr3 | 3762912 | 3762968 | CSAR_peak_ | 6.02,9.55,14.  | - |
| chr3 | 3763132 | 3763198 | CSAR_peak_ | 10.83,10.02    | - |
| chr3 | 3763377 | 3763437 | CSAR_peak_ | 12.74,17.82    | - |
| chr3 | 3763536 | 3763599 | CSAR_peak_ | 12.17,7.27     | - |
| chr3 | 3763734 | 3763799 | CSAR_peak_ | 19.36,19.98    | - |
| chr3 | 3763897 | 3763912 | CSAR_peak_ | 6.45           | - |
| chr3 | 3763972 | 3764096 | CSAR_peak_ | 25.1,11.07,6.  | - |
| chr3 | 3764279 | 3764389 | CSAR_peak_ | 13.48,6.44     | - |
| chr3 | 3764513 | 3764590 | CSAR_peak_ | 5.86,13.48,6.  | - |
| chr3 | 3764671 | 3764780 | CSAR_peak_ | 12.17,13.6     | - |
| chr3 | 3764926 | 3764968 | CSAR_peak_ | 12.17,17.82    | - |
| chr3 | 3765098 | 3765224 | CSAR_peak_ | 40.54,26.52,(- | - |
| chr3 | 3765601 | 3765626 | CSAR_peak_ | 8.65,9.58      | - |
| chr3 | 3765672 | 3765724 | CSAR_peak_ | 6.21           | - |
| chr3 | 3766089 | 3766139 | CSAR_peak_ | 6.21,8.39      | - |
| chr3 | 3766153 | 3766208 | CSAR_peak_ | 9.58           | - |
| chr3 | 3766376 | 3766461 | CSAR_peak_ | 13.09,11.96    | - |
| chr3 | 3766606 | 3766685 | CSAR_peak_ | 11.03,6.54,7.  | - |
| chr3 | 3767064 | 3767089 | CSAR_peak_ | 6.21           | - |
| chr3 | 3767473 | 3767523 | CSAR_peak_ | 7.27           | - |
| chr3 | 3767615 | 3767657 | CSAR_peak_ | 5.86           | - |
| chr3 | 3768007 | 3768111 | CSAR_peak_ | 6.44,6.21      | - |
| chr3 | 3768237 | 3768279 | CSAR_peak_ | 6.21           | - |
| chr3 | 3768302 | 3768334 | CSAR_peak_ | 8.39           | - |
| chr3 | 3768411 | 3768451 | CSAR_peak_ | 8.39           | - |
| chr3 | 3768843 | 3769014 | CSAR_peak_ | 20.94,10.02    | - |
| chr3 | 3769315 | 3769436 | CSAR_peak_ | 14.88,15.68    | - |
| chr3 | 3769925 | 3769992 | CSAR_peak_ | 12.93,8.28     | - |
| chr3 | 3770261 | 3770314 | CSAR_peak_ | 8.39,12.13     | - |
| chr3 | 3778654 | 3778734 | CSAR_peak_ | 14.76          | - |
| chr3 | 3795995 | 3796068 | CSAR_peak_ | 12.13          | - |

|      |         |         |            |               |   |
|------|---------|---------|------------|---------------|---|
| chr3 | 3799014 | 3799072 | CSAR_peak_ | 12.17         | - |
| chr3 | 3801533 | 3801578 | CSAR_peak_ | 7.27          | - |
| chr3 | 3802600 | 3802703 | CSAR_peak_ | 8.39          | - |
| chr3 | 3852805 | 3852832 | CSAR_peak_ | 7.27          | - |
| chr3 | 3854939 | 3854988 | CSAR_peak_ | 7.27          | - |
| chr3 | 3860572 | 3860619 | CSAR_peak_ | 8.39          | - |
| chr3 | 3860625 | 3860674 | CSAR_peak_ | 6.03          | - |
| chr3 | 3866328 | 3866366 | CSAR_peak_ | 10.83         | - |
| chr3 | 3868183 | 3868234 | CSAR_peak_ | 6.21          | - |
| chr3 | 3868707 | 3868822 | CSAR_peak_ | 8.39,16.33    | - |
| chr3 | 3868852 | 3868964 | CSAR_peak_ | 19.36,9.58    | - |
| chr3 | 3869347 | 3869459 | CSAR_peak_ | 21.94,11.14   | - |
| chr3 | 3869473 | 3869542 | CSAR_peak_ | 21.94,14.88   | - |
| chr3 | 3869711 | 3869783 | CSAR_peak_ | 8.65          | - |
| chr3 | 3869973 | 3870042 | CSAR_peak_ | 8.09          | - |
| chr3 | 3870210 | 3870319 | CSAR_peak_ | 12.13,17.82   | - |
| chr3 | 3870676 | 3870722 | CSAR_peak_ | 7.78,24.21    | - |
| chr3 | 3871202 | 3871235 | CSAR_peak_ | 7.27          | - |
| chr3 | 3877065 | 3877130 | CSAR_peak_ | 12.13         | - |
| chr3 | 3877929 | 3878040 | CSAR_peak_ | 6.81,14.88,1  | - |
| chr3 | 3890053 | 3890116 | CSAR_peak_ | 9.58,6.21     | - |
| chr3 | 3913782 | 3913846 | CSAR_peak_ | 9.77,9.58     | - |
| chr3 | 3914476 | 3914512 | CSAR_peak_ | 7.27          | - |
| chr3 | 3917725 | 3917794 | CSAR_peak_ | 6.44          | - |
| chr3 | 3922048 | 3922099 | CSAR_peak_ | 6.95          | - |
| chr3 | 3922450 | 3922496 | CSAR_peak_ | 9.58          | - |
| chr3 | 3944388 | 3944430 | CSAR_peak_ | 7.27          | - |
| chr3 | 3944677 | 3944729 | CSAR_peak_ | 6.21,6.57     | - |
| chr3 | 3944879 | 3944932 | CSAR_peak_ | 10.83         | - |
| chr3 | 3960626 | 3960737 | CSAR_peak_ | 18.95,15.9,9. | - |
| chr3 | 3961054 | 3961174 | CSAR_peak_ | 9.97,9.55,7.2 | - |
| chr3 | 3961178 | 3961231 | CSAR_peak_ | 26.69,14.88   | - |
| chr3 | 3961268 | 3961526 | CSAR_peak_ | 20.13,16.33,  | - |
| chr3 | 3961676 | 3961716 | CSAR_peak_ | 12.13,9.58    | - |
| chr3 | 3961722 | 3961751 | CSAR_peak_ | 7.58          | - |
| chr3 | 3995830 | 3995884 | CSAR_peak_ | 8.39          | - |
| chr3 | 3996269 | 3996352 | CSAR_peak_ | 5.86,7.58,9.5 | - |
| chr3 | 3999644 | 3999687 | CSAR_peak_ | 7.27          | - |
| chr3 | 3999958 | 4000004 | CSAR_peak_ | 7.29          | - |
| chr3 | 4000556 | 4000605 | CSAR_peak_ | 7.27          | - |
| chr3 | 4001287 | 4001350 | CSAR_peak_ | 8.39          | - |
| chr3 | 4002365 | 4002416 | CSAR_peak_ | 10.83,5.86    | - |

|      |         |         |            |                  |         |
|------|---------|---------|------------|------------------|---------|
| chr3 | 4002860 | 4002920 | CSAR_peak_ | 5.86,7.27        | -       |
| chr3 | 4020338 | 4020425 | CSAR_peak_ | 7.58,7.27        | -       |
| chr3 | 4020819 | 4020883 | CSAR_peak_ | 9.58,6.95        | -       |
| chr3 | 4020970 | 4021022 | CSAR_peak_ |                  | 6.87 -  |
| chr3 | 4021135 | 4021175 | CSAR_peak_ |                  | 6.21 -  |
| chr3 | 4021550 | 4021614 | CSAR_peak_ |                  | 8.39 -  |
| chr3 | 4021702 | 4021735 | CSAR_peak_ |                  | 9.58 -  |
| chr3 | 4022083 | 4022153 | CSAR_peak_ | 8.39,8.65        | -       |
| chr3 | 4023557 | 4023635 | CSAR_peak_ | 17.82,14.88      | -       |
| chr3 | 4023731 | 4023796 | CSAR_peak_ |                  | 9.77 -  |
| chr3 | 4026769 | 4026801 | CSAR_peak_ |                  | 9.27 -  |
| chr3 | 4040685 | 4040725 | CSAR_peak_ |                  | 6.03 -  |
| chr3 | 4040891 | 4041070 | CSAR_peak_ | 30.02,14.88      | -       |
| chr3 | 4041154 | 4041230 | CSAR_peak_ |                  | 7.27 -  |
| chr3 | 4041799 | 4041840 | CSAR_peak_ |                  | 7.27 -  |
| chr3 | 4061313 | 4061337 | CSAR_peak_ |                  | 13.85 - |
| chr3 | 4061414 | 4061573 | CSAR_peak_ | 14.85,6.57,10.83 | -       |
| chr3 | 4061804 | 4061862 | CSAR_peak_ | 10.83,7.27       | -       |
| chr3 | 4062856 | 4062913 | CSAR_peak_ |                  | 10.83 - |
| chr3 | 4063849 | 4063955 | CSAR_peak_ |                  | 6.02 -  |
| chr3 | 4064072 | 4064121 | CSAR_peak_ |                  | 8.65 -  |
| chr3 | 4171562 | 4171613 | CSAR_peak_ |                  | 9.58 -  |
| chr3 | 4172281 | 4172402 | CSAR_peak_ |                  | 10.83 - |
| chr3 | 4172428 | 4172519 | CSAR_peak_ | 13.66,13.85      | -       |
| chr3 | 4172616 | 4172693 | CSAR_peak_ | 9.77,6.87        | -       |
| chr3 | 4172695 | 4172709 | CSAR_peak_ |                  | 14.88 - |
| chr3 | 4172793 | 4172840 | CSAR_peak_ |                  | 22.56 - |
| chr3 | 4172959 | 4173025 | CSAR_peak_ | 17.37,14.85      | -       |
| chr3 | 4173139 | 4173174 | CSAR_peak_ |                  | 13.48 - |
| chr3 | 4173263 | 4173347 | CSAR_peak_ |                  | 16.11 - |
| chr3 | 4173492 | 4173570 | CSAR_peak_ | 7.27,9.58        | -       |
| chr3 | 4182172 | 4182222 | CSAR_peak_ |                  | 7.27 -  |
| chr3 | 4182720 | 4182771 | CSAR_peak_ |                  | 7.27 -  |
| chr3 | 4183559 | 4183648 | CSAR_peak_ |                  | 9.77 -  |
| chr3 | 4183705 | 4183791 | CSAR_peak_ | 7,16.33,5.86,-   | -       |
| chr3 | 4183809 | 4183856 | CSAR_peak_ |                  | 8.39 -  |
| chr3 | 4192552 | 4192593 | CSAR_peak_ |                  | 5.86 -  |
| chr3 | 4193173 | 4193276 | CSAR_peak_ | 8.28,12.13       | -       |
| chr3 | 4193365 | 4193439 | CSAR_peak_ | 8.2,8.39,6.85-   | -       |
| chr3 | 4193561 | 4193610 | CSAR_peak_ |                  | 8.65 -  |
| chr3 | 4196427 | 4196468 | CSAR_peak_ |                  | 6.03 -  |
| chr3 | 4196507 | 4196559 | CSAR_peak_ |                  | 6.21 -  |

|      |         |         |            |               |   |
|------|---------|---------|------------|---------------|---|
| chr3 | 4196621 | 4196691 | CSAR_peak_ | 14.88         | - |
| chr3 | 4196818 | 4196868 | CSAR_peak_ | 7.27          | - |
| chr3 | 4198320 | 4198383 | CSAR_peak_ | 7.27          | - |
| chr3 | 4199011 | 4199073 | CSAR_peak_ | 14.88         | - |
| chr3 | 4199315 | 4199360 | CSAR_peak_ | 9.58          | - |
| chr3 | 4199921 | 4199979 | CSAR_peak_ | 7.27          | - |
| chr3 | 4203106 | 4203120 | CSAR_peak_ | 6.21          | - |
| chr3 | 4203425 | 4203463 | CSAR_peak_ | 8.39          | - |
| chr3 | 4203538 | 4203593 | CSAR_peak_ | 5.86,6.21     | - |
| chr3 | 4203692 | 4203758 | CSAR_peak_ | 7.27          | - |
| chr3 | 4203886 | 4203935 | CSAR_peak_ | 6.21,6.57     | - |
| chr3 | 4204559 | 4204595 | CSAR_peak_ | 6.21          | - |
| chr3 | 4205373 | 4205408 | CSAR_peak_ | 6.21          | - |
| chr3 | 4206746 | 4206822 | CSAR_peak_ | 13.48         | - |
| chr3 | 4208959 | 4208990 | CSAR_peak_ | 12.13         | - |
| chr3 | 4209074 | 4209112 | CSAR_peak_ | 7.27          | - |
| chr3 | 4209232 | 4209324 | CSAR_peak_ | 9.35,12.13    | - |
| chr3 | 4209399 | 4209474 | CSAR_peak_ | 17.82,10.02,  | - |
| chr3 | 4209546 | 4209616 | CSAR_peak_ | 24.21         | - |
| chr3 | 4209745 | 4209820 | CSAR_peak_ | 10.83         | - |
| chr3 | 4210394 | 4210455 | CSAR_peak_ | 20.43         | - |
| chr3 | 4211409 | 4211494 | CSAR_peak_ | 20.43,12.31   | - |
| chr3 | 4211885 | 4211995 | CSAR_peak_ | 10.83,9.58    | - |
| chr3 | 4212036 | 4212127 | CSAR_peak_ | 12.13         | - |
| chr3 | 4212579 | 4212636 | CSAR_peak_ | 9.58,14.88    | - |
| chr3 | 4212676 | 4212777 | CSAR_peak_ | 14.88,12.13   | - |
| chr3 | 4213046 | 4213103 | CSAR_peak_ | 8.65          | - |
| chr3 | 4213481 | 4213599 | CSAR_peak_ | 14.88,12.13   | - |
| chr3 | 4214303 | 4214354 | CSAR_peak_ | 6.21,7.27     | - |
| chr3 | 4214517 | 4214587 | CSAR_peak_ | 7.27          | - |
| chr3 | 4215010 | 4215078 | CSAR_peak_ | 7.27,9.58     | - |
| chr3 | 4215113 | 4215162 | CSAR_peak_ | 19.93,5.86,8. | - |
| chr3 | 4215263 | 4215437 | CSAR_peak_ | 14.88,8.39,9. | - |
| chr3 | 4215610 | 4215657 | CSAR_peak_ | 7.27          | - |
| chr3 | 4215703 | 4215792 | CSAR_peak_ | 19.36,16.33   | - |
| chr3 | 4219951 | 4219997 | CSAR_peak_ | 7.27          | - |
| chr3 | 4220595 | 4220622 | CSAR_peak_ | 7.27          | - |
| chr3 | 4221111 | 4221137 | CSAR_peak_ | 10.83         | - |
| chr3 | 4237592 | 4237635 | CSAR_peak_ | 8.39          | - |
| chr3 | 4238883 | 4238939 | CSAR_peak_ | 6.21          | - |
| chr3 | 4259313 | 4259398 | CSAR_peak_ | 9.58,7.27     | - |
| chr3 | 4260654 | 4260699 | CSAR_peak_ | 6.57          | - |



|      |         |         |             |                |   |
|------|---------|---------|-------------|----------------|---|
| chr3 | 4261601 | 4261666 | CSAR_peak_  | 9.58           | - |
| chr3 | 4261736 | 4261793 | CSAR_peak_  | 7.27           | - |
| chr3 | 4262003 | 4262069 | CSAR_peak_! | 12.59,14.88    | - |
| chr3 | 4262306 | 4262371 | CSAR_peak_  | 8.65           | - |
| chr3 | 4262493 | 4262556 | CSAR_peak_! | 12.59          | - |
| chr3 | 4262769 | 4262865 | CSAR_peak_! | 10.83,10.18,(  | - |
| chr3 | 4310001 | 4310041 | CSAR_peak_  | 6.21           | - |
| chr3 | 4310614 | 4310666 | CSAR_peak_  | 17.82,9.58     | - |
| chr3 | 4310852 | 4310864 | CSAR_peak_  | 6.51           | - |
| chr3 | 4310880 | 4311323 | CSAR_peak_  | 42.67,34.43,(- | - |
| chr3 | 4320021 | 4320073 | CSAR_peak_  | 9.58,8.39      | - |
| chr3 | 4320516 | 4320563 | CSAR_peak_  | 10.83          | - |
| chr3 | 4320795 | 4320847 | CSAR_peak_  | 6.21           | - |
| chr3 | 4324179 | 4324268 | CSAR_peak_  | 15.43          | - |
| chr3 | 4324543 | 4324631 | CSAR_peak_  | 14.88,13.48    | - |
| chr3 | 4326242 | 4326281 | CSAR_peak_  | 6.57           | - |
| chr3 | 4327289 | 4327355 | CSAR_peak_  | 14.88,8.9      | - |
| chr3 | 4327446 | 4327460 | CSAR_peak_  | 9.58           | - |
| chr3 | 4327867 | 4328044 | CSAR_peak_  | 13.48,17.82,(- | - |
| chr3 | 4328852 | 4328906 | CSAR_peak_  | 6.21           | - |
| chr3 | 4329133 | 4329229 | CSAR_peak_  | 9.77,13.48     | - |
| chr3 | 4329387 | 4329448 | CSAR_peak_  | 7.78,7.27      | - |
| chr3 | 4329961 | 4330084 | CSAR_peak_  | 7.27           | - |
| chr3 | 4335934 | 4335999 | CSAR_peak_  | 10.02          | - |
| chr3 | 4336187 | 4336274 | CSAR_peak_  | 7.27           | - |
| chr3 | 4337079 | 4337122 | CSAR_peak_  | 6.21           | - |
| chr3 | 4361894 | 4361966 | CSAR_peak_  | 19.36,13.48    | - |
| chr3 | 4362185 | 4362242 | CSAR_peak_  | 8.39           | - |
| chr3 | 4362740 | 4362775 | CSAR_peak_  | 6.95           | - |
| chr3 | 4362947 | 4362992 | CSAR_peak_  | 6.21           | - |
| chr3 | 4363040 | 4363112 | CSAR_peak_  | 9.58,8.65      | - |
| chr3 | 4363699 | 4363791 | CSAR_peak_  | 7.27,14.88     | - |
| chr3 | 4363802 | 4363881 | CSAR_peak_! | 6.81,10.83,9.- | - |
| chr3 | 4363996 | 4364052 | CSAR_peak_  | 6.21           | - |
| chr3 | 4380378 | 4380431 | CSAR_peak_  | 12.13          | - |
| chr3 | 4382084 | 4382187 | CSAR_peak_  | 8.39,6.21      | - |
| chr3 | 4382325 | 4382376 | CSAR_peak_  | 7.34           | - |
| chr3 | 4382505 | 4382569 | CSAR_peak_  | 26.69,10.33    | - |
| chr3 | 4382638 | 4382640 | CSAR_peak_  | 6.21           | - |
| chr3 | 4382786 | 4383045 | CSAR_peak_  | 33.75,44.69,(  | - |
| chr3 | 4383121 | 4383199 | CSAR_peak_  | 10.53          | - |
| chr3 | 4383264 | 4383379 | CSAR_peak_  | 7.61,10.83,2(- | - |

|      |         |         |            |                 |   |
|------|---------|---------|------------|-----------------|---|
| chr3 | 4383436 | 4383560 | CSAR_peak_ | 9.58,12.13      | - |
| chr3 | 4383613 | 4383715 | CSAR_peak_ | 9.58,17.8       | - |
| chr3 | 4383749 | 4383796 | CSAR_peak_ | 9.35            | - |
| chr3 | 4383891 | 4384063 | CSAR_peak_ | 28.94,9.61,11.1 | - |
| chr3 | 4384177 | 4384243 | CSAR_peak_ | 8.92,6.44       | - |
| chr3 | 4384343 | 4384384 | CSAR_peak_ | 7.27            | - |
| chr3 | 4385119 | 4385357 | CSAR_peak_ | 9.27,14.88,11.1 | - |
| chr3 | 4385524 | 4385632 | CSAR_peak_ | 14.76,9.72      | - |
| chr3 | 4385761 | 4385836 | CSAR_peak_ | 42.27,57.27     | - |
| chr3 | 4386267 | 4386290 | CSAR_peak_ | 7.27            | - |
| chr3 | 4386303 | 4386481 | CSAR_peak_ | 30.53,20.58     | - |
| chr3 | 4386511 | 4386602 | CSAR_peak_ | 6.57,14.88      | - |
| chr3 | 4387157 | 4387205 | CSAR_peak_ | 9.58            | - |
| chr3 | 4387330 | 4387349 | CSAR_peak_ | 7.7             | - |
| chr3 | 4387402 | 4387512 | CSAR_peak_ | 9.77,28.21,11.1 | - |
| chr3 | 4387720 | 4387745 | CSAR_peak_ | 10.95,8.28      | - |
| chr3 | 4387835 | 4387966 | CSAR_peak_ | 27.83,9.48,21.1 | - |
| chr3 | 4393146 | 4393208 | CSAR_peak_ | 7.27            | - |
| chr3 | 4396225 | 4396317 | CSAR_peak_ | 12.13,7.27      | - |
| chr3 | 4396370 | 4396402 | CSAR_peak_ | 5.86            | - |
| chr3 | 4397131 | 4397153 | CSAR_peak_ | 6.03            | - |
| chr3 | 4397255 | 4397287 | CSAR_peak_ | 7               | - |
| chr3 | 4397696 | 4397748 | CSAR_peak_ | 7.27,6.21       | - |
| chr3 | 4411998 | 4412106 | CSAR_peak_ | 20.94,9.58      | - |
| chr3 | 4412209 | 4412257 | CSAR_peak_ | 6.21            | - |
| chr3 | 4413480 | 4413524 | CSAR_peak_ | 7.27            | - |
| chr3 | 4413560 | 4413585 | CSAR_peak_ | 8.39            | - |
| chr3 | 4413668 | 4413731 | CSAR_peak_ | 6.81,12.13      | - |
| chr3 | 4415156 | 4415221 | CSAR_peak_ | 9.58            | - |
| chr3 | 4415936 | 4416002 | CSAR_peak_ | 7.58,12.17      | - |
| chr3 | 4416146 | 4416185 | CSAR_peak_ | 24.21           | - |
| chr3 | 4416546 | 4416656 | CSAR_peak_ | 32.27,15.2      | - |
| chr3 | 4417071 | 4417110 | CSAR_peak_ | 10.83,10.95     | - |
| chr3 | 4417312 | 4417382 | CSAR_peak_ | 25.91,12.17     | - |
| chr3 | 4417396 | 4417413 | CSAR_peak_ | 9.58            | - |
| chr3 | 4417522 | 4417559 | CSAR_peak_ | 12.13           | - |
| chr3 | 4418041 | 4418143 | CSAR_peak_ | 9.58,19.36,7.58 | - |
| chr3 | 4418265 | 4418349 | CSAR_peak_ | 9.58            | - |
| chr3 | 4418415 | 4418462 | CSAR_peak_ | 7.27,6.03       | - |
| chr3 | 4418593 | 4418665 | CSAR_peak_ | 19.36,7.58      | - |
| chr3 | 4419043 | 4419110 | CSAR_peak_ | 6.21,7.27       | - |
| chr3 | 4424772 | 4424807 | CSAR_peak_ | 7.58            | - |

|      |         |         |            |               |   |
|------|---------|---------|------------|---------------|---|
| chr3 | 4430152 | 4430193 | CSAR_peak_ | 8.39          | - |
| chr3 | 4481411 | 4481469 | CSAR_peak_ | 6.21          | - |
| chr3 | 4522619 | 4522677 | CSAR_peak_ | 8.39          | - |
| chr3 | 4523573 | 4523620 | CSAR_peak_ | 7.27          | - |
| chr3 | 4533255 | 4533287 | CSAR_peak_ | 12.13         | - |
| chr3 | 4533865 | 4534084 | CSAR_peak_ | 16.34,9.58    | - |
| chr3 | 4534118 | 4534214 | CSAR_peak_ | 8.39,14.85    | - |
| chr3 | 4534233 | 4534280 | CSAR_peak_ | 6.02,7.27     | - |
| chr3 | 4534343 | 4534534 | CSAR_peak_ | 5.86,10.31,1  | - |
| chr3 | 4534569 | 4534629 | CSAR_peak_ | 10.02         | - |
| chr3 | 4534771 | 4534838 | CSAR_peak_ | 13.51         | - |
| chr3 | 4534954 | 4535016 | CSAR_peak_ | 6.21          | - |
| chr3 | 4535156 | 4535207 | CSAR_peak_ | 6.57          | - |
| chr3 | 4535729 | 4535788 | CSAR_peak_ | 14.88,11.14   | - |
| chr3 | 4562286 | 4562352 | CSAR_peak_ | 7.27          | - |
| chr3 | 4564247 | 4564305 | CSAR_peak_ | 8.39          | - |
| chr3 | 4564503 | 4564587 | CSAR_peak_ | 14.88         | - |
| chr3 | 4565741 | 4565792 | CSAR_peak_ | 9.58          | - |
| chr3 | 4565838 | 4565895 | CSAR_peak_ | 6.21          | - |
| chr3 | 4566347 | 4566382 | CSAR_peak_ | 14.88         | - |
| chr3 | 4566599 | 4566660 | CSAR_peak_ | 12.13,7.47    | - |
| chr3 | 4566826 | 4566975 | CSAR_peak_ | 7.27,12.17,8. | - |
| chr3 | 4567074 | 4567171 | CSAR_peak_ | 8.65,16.33    | - |
| chr3 | 4567287 | 4567410 | CSAR_peak_ | 9.79,35.4     | - |
| chr3 | 4567637 | 4567762 | CSAR_peak_ | 10.02,24.21,  | - |
| chr3 | 4567869 | 4567929 | CSAR_peak_ | 18.95,13.85   | - |
| chr3 | 4567975 | 4568016 | CSAR_peak_ | 6.21          | - |
| chr3 | 4568400 | 4568481 | CSAR_peak_ | 11.14,16.08   | - |
| chr3 | 4568583 | 4568639 | CSAR_peak_ | 9.58          | - |
| chr3 | 4569294 | 4569342 | CSAR_peak_ | 13.48         | - |
| chr3 | 4569423 | 4569489 | CSAR_peak_ | 9.58          | - |
| chr3 | 4569578 | 4569635 | CSAR_peak_ | 10.12,10.13   | - |
| chr3 | 4569732 | 4569764 | CSAR_peak_ | 7.92,12.13    | - |
| chr3 | 4570054 | 4570109 | CSAR_peak_ | 8.28          | - |
| chr3 | 4570111 | 4570157 | CSAR_peak_ | 8.99          | - |
| chr3 | 4570246 | 4570292 | CSAR_peak_ | 13.48,7.13    | - |
| chr3 | 4570427 | 4570497 | CSAR_peak_ | 6.57          | - |
| chr3 | 4592537 | 4592735 | CSAR_peak_ | 20.94,16.33,  | - |
| chr3 | 4593352 | 4593405 | CSAR_peak_ | 7.27          | - |
| chr3 | 4593896 | 4593990 | CSAR_peak_ | 12.13,13.44   | - |
| chr3 | 4594061 | 4594144 | CSAR_peak_ | 9.32,56.4     | - |
| chr3 | 4594229 | 4594320 | CSAR_peak_ | 14.78,11.81,  | - |

|      |         |         |            |               |   |
|------|---------|---------|------------|---------------|---|
| chr3 | 4594325 | 4594372 | CSAR_peak_ | 7.43,12.11    | - |
| chr3 | 4594778 | 4594797 | CSAR_peak_ | 7.27,9.58     | - |
| chr3 | 4611380 | 4611427 | CSAR_peak_ | 6.21          | - |
| chr3 | 4627005 | 4627062 | CSAR_peak_ | 10.02         | - |
| chr3 | 4627530 | 4627641 | CSAR_peak_ | 12.17,17.82   | - |
| chr3 | 4627856 | 4627928 | CSAR_peak_ | 7.27,7.58     | - |
| chr3 | 4629292 | 4629337 | CSAR_peak_ | 6.21          | - |
| chr3 | 4630206 | 4630257 | CSAR_peak_ | 7.27,8.95     | - |
| chr3 | 4651043 | 4651260 | CSAR_peak_ | 16,31.58,23.1 | - |
| chr3 | 4651277 | 4651377 | CSAR_peak_ | 14.88,12.17   | - |
| chr3 | 4651464 | 4651497 | CSAR_peak_ | 10.83         | - |
| chr3 | 4651499 | 4651715 | CSAR_peak_ | 10.96,35.4    | - |
| chr3 | 4651723 | 4652015 | CSAR_peak_ | 38.71,9.48,21 | - |
| chr3 | 4652035 | 4652124 | CSAR_peak_ | 7.27          | - |
| chr3 | 4652151 | 4652451 | CSAR_peak_ | 34.26,10.52,1 | - |
| chr3 | 4652479 | 4652626 | CSAR_peak_ | 19.36,33.38,1 | - |
| chr3 | 4652629 | 4652979 | CSAR_peak_ | 42.44,29.4,51 | - |
| chr3 | 4653015 | 4653150 | CSAR_peak_ | 8.65,20.13,10 | - |
| chr3 | 4653231 | 4653282 | CSAR_peak_ | 9.58          | - |
| chr3 | 4653474 | 4653576 | CSAR_peak_ | 8.39,13.44,7  | - |
| chr3 | 4653662 | 4653702 | CSAR_peak_ | 12.13         | - |
| chr3 | 4653742 | 4653784 | CSAR_peak_ | 6.21          | - |
| chr3 | 4658465 | 4658520 | CSAR_peak_ | 7.27          | - |
| chr3 | 4658545 | 4658605 | CSAR_peak_ | 7.27          | - |
| chr3 | 4658655 | 4658695 | CSAR_peak_ | 6.21          | - |
| chr3 | 4659540 | 4659612 | CSAR_peak_ | 9.58          | - |
| chr3 | 4660119 | 4660207 | CSAR_peak_ | 7.92,12.13    | - |
| chr3 | 4660318 | 4660367 | CSAR_peak_ | 10.83         | - |
| chr3 | 4663993 | 4664065 | CSAR_peak_ | 7.27,6.21     | - |
| chr3 | 4664238 | 4664312 | CSAR_peak_ | 7.27,7.34     | - |
| chr3 | 4664966 | 4665073 | CSAR_peak_ | 13.48         | - |
| chr3 | 4666226 | 4666293 | CSAR_peak_ | 6.21          | - |
| chr3 | 4666632 | 4666701 | CSAR_peak_ | 22.56         | - |
| chr3 | 4690597 | 4690643 | CSAR_peak_ | 6.21          | - |
| chr3 | 4690942 | 4691001 | CSAR_peak_ | 8.65,14.88    | - |
| chr3 | 4691196 | 4691219 | CSAR_peak_ | 11.14         | - |
| chr3 | 4691310 | 4691355 | CSAR_peak_ | 12.27,6.02    | - |
| chr3 | 4691635 | 4691682 | CSAR_peak_ | 12.13,9.58    | - |
| chr3 | 4691792 | 4691917 | CSAR_peak_ | 19.36,9.58,8  | - |
| chr3 | 4699125 | 4699184 | CSAR_peak_ | 9.77          | - |
| chr3 | 4699507 | 4699576 | CSAR_peak_ | 6.21          | - |
| chr3 | 4699936 | 4699991 | CSAR_peak_ | 7.27          | - |

|      |         |         |            |                   |   |
|------|---------|---------|------------|-------------------|---|
| chr3 | 4700823 | 4700901 | CSAR_peak_ | 9.77,11.63        | - |
| chr3 | 4702827 | 4702865 | CSAR_peak_ | 7.27              | - |
| chr3 | 4702868 | 4702911 | CSAR_peak_ | 7.58              | - |
| chr3 | 4704270 | 4704323 | CSAR_peak_ | 6.64              | - |
| chr3 | 4705430 | 4705503 | CSAR_peak_ | 9.58              | - |
| chr3 | 4707504 | 4707564 | CSAR_peak_ | 13.48,10.83       | - |
| chr3 | 4708184 | 4708319 | CSAR_peak_ | 14.88,9.58        | - |
| chr3 | 4712018 | 4712078 | CSAR_peak_ | 6.21              | - |
| chr3 | 4712901 | 4712971 | CSAR_peak_ | 17.51,8.65        | - |
| chr3 | 4713264 | 4713342 | CSAR_peak_ | 9.58              | - |
| chr3 | 4713426 | 4713490 | CSAR_peak_ | 20.94             | - |
| chr3 | 4713905 | 4713981 | CSAR_peak_ | 9.58,7.73         | - |
| chr3 | 4714251 | 4714313 | CSAR_peak_ | 12.13,6.21        | - |
| chr3 | 4716176 | 4716246 | CSAR_peak_ | 7.58              | - |
| chr3 | 4716627 | 4716698 | CSAR_peak_ | 8.39              | - |
| chr3 | 4716700 | 4716785 | CSAR_peak_ | 6.57,9.58         | - |
| chr3 | 4716911 | 4717013 | CSAR_peak_ | 11.38             | - |
| chr3 | 4717122 | 4717215 | CSAR_peak_ | 12.13             | - |
| chr3 | 4717497 | 4717585 | CSAR_peak_ | 12.13,9.58        | - |
| chr3 | 4717851 | 4717910 | CSAR_peak_ | 6.21              | - |
| chr3 | 4718001 | 4718069 | CSAR_peak_ | 6.21              | - |
| chr3 | 4718088 | 4718135 | CSAR_peak_ | 9.43              | - |
| chr3 | 4718224 | 4718330 | CSAR_peak_ | 30.8,9.94         | - |
| chr3 | 4718552 | 4718604 | CSAR_peak_ | 10.76             | - |
| chr3 | 4719071 | 4719237 | CSAR_peak_ | 20.43,7.27,10.76  | - |
| chr3 | 4719254 | 4719313 | CSAR_peak_ | 6.87,6.85         | - |
| chr3 | 4719896 | 4719932 | CSAR_peak_ | 6.21,8.39         | - |
| chr3 | 4720142 | 4720254 | CSAR_peak_ | 31.2,11.83        | - |
| chr3 | 4720286 | 4720340 | CSAR_peak_ | 6.57,6.03         | - |
| chr3 | 4720630 | 4720685 | CSAR_peak_ | 9.58              | - |
| chr3 | 4737407 | 4737560 | CSAR_peak_ | 14.88,15.2        | - |
| chr3 | 4737580 | 4737839 | CSAR_peak_ | 31.2,36.74        | - |
| chr3 | 4737934 | 4738007 | CSAR_peak_ | 12.13             | - |
| chr3 | 4738014 | 4738094 | CSAR_peak_ | 7.27,13.48        | - |
| chr3 | 4738129 | 4738191 | CSAR_peak_ | 12.17             | - |
| chr3 | 4738211 | 4738613 | CSAR_peak_ | 46.91,14.22,10.76 | - |
| chr3 | 4738685 | 4738763 | CSAR_peak_ | 17.4,12.13        | - |
| chr3 | 4738792 | 4738858 | CSAR_peak_ | 9.77,13.44        | - |
| chr3 | 4738906 | 4738947 | CSAR_peak_ | 9.58              | - |
| chr3 | 4738985 | 4739129 | CSAR_peak_ | 25.07,12.13,10.76 | - |
| chr3 | 4742703 | 4742783 | CSAR_peak_ | 9.58              | - |
| chr3 | 4748162 | 4748224 | CSAR_peak_ | 6.21              | - |

|      |         |         |             |                |   |
|------|---------|---------|-------------|----------------|---|
| chr3 | 4772013 | 4772100 | CSAR_peak_  | 13.48          | - |
| chr3 | 4772131 | 4772223 | CSAR_peak_  | 12.13,9.58     | - |
| chr3 | 4772256 | 4772794 | CSAR_peak_  | 7.27,18.65,9.  | - |
| chr3 | 4773369 | 4773434 | CSAR_peak_  | 33.03,21.24    | - |
| chr3 | 4773581 | 4773679 | CSAR_peak_  | 29.96,13.51    | - |
| chr3 | 4773710 | 4773879 | CSAR_peak_  | 16.33,17.82    | - |
| chr3 | 4773903 | 4774083 | CSAR_peak_  | 17.52,40.72    | - |
| chr3 | 4774170 | 4774215 | CSAR_peak_  | 9.27           | - |
| chr3 | 4774484 | 4774536 | CSAR_peak_  | 18.73          | - |
| chr3 | 4774651 | 4774834 | CSAR_peak_  | 30.02,16.33,,- | - |
| chr3 | 4774970 | 4775037 | CSAR_peak_  | 9.77           | - |
| chr3 | 4783000 | 4783060 | CSAR_peak_  | 22.56          | - |
| chr3 | 4783083 | 4783151 | CSAR_peak_  | 8.39           | - |
| chr3 | 4783161 | 4783247 | CSAR_peak_  | 7.58           | - |
| chr3 | 4783257 | 4783324 | CSAR_peak_! | 8.14           | - |
| chr3 | 4783584 | 4783717 | CSAR_peak_  | 8.65,12.13     | - |
| chr3 | 4784148 | 4784228 | CSAR_peak_  | 7.27           | - |
| chr3 | 4784287 | 4784309 | CSAR_peak_  | 9.61           | - |
| chr3 | 4784396 | 4784449 | CSAR_peak_  | 11.96          | - |
| chr3 | 4784626 | 4784686 | CSAR_peak_  | 12.17,11.38    | - |
| chr3 | 4784777 | 4784876 | CSAR_peak_  | 8.39,14.88,7.- | - |
| chr3 | 4785192 | 4785251 | CSAR_peak_  | 19.36          | - |
| chr3 | 4786003 | 4786035 | CSAR_peak_  | 12.13,9.58     | - |
| chr3 | 4786126 | 4786174 | CSAR_peak_  | 10.83,7.27     | - |
| chr3 | 4786282 | 4786415 | CSAR_peak_  | 22.56,9.77     | - |
| chr3 | 4786906 | 4786936 | CSAR_peak_  | 16.33          | - |
| chr3 | 4811926 | 4812020 | CSAR_peak_  | 12.13,9.58     | - |
| chr3 | 4812241 | 4812289 | CSAR_peak_  | 11.14          | - |
| chr3 | 4812359 | 4812367 | CSAR_peak_  | 10.83,8.39     | - |
| chr3 | 4812455 | 4812511 | CSAR_peak_  | 21.94,13.85    | - |
| chr3 | 4813264 | 4813358 | CSAR_peak_  | 8.13,6.81      | - |
| chr3 | 4813386 | 4813468 | CSAR_peak_  | 8.39,9.58      | - |
| chr3 | 4814276 | 4814315 | CSAR_peak_  | 9.58           | - |
| chr3 | 4814395 | 4814426 | CSAR_peak_  | 7.27           | - |
| chr3 | 4814536 | 4814562 | CSAR_peak_  | 7.92           | - |
| chr3 | 4815172 | 4815210 | CSAR_peak_  | 7.27           | - |
| chr3 | 4816916 | 4816955 | CSAR_peak_  | 8.65           | - |
| chr3 | 4817820 | 4817861 | CSAR_peak_  | 7.27           | - |
| chr3 | 4832411 | 4832453 | CSAR_peak_  | 6.21           | - |
| chr3 | 4903283 | 4903327 | CSAR_peak_  | 8.39,6.21      | - |
| chr3 | 4904389 | 4904797 | CSAR_peak_  | 31.58,36.74,,- | - |
| chr3 | 4904831 | 4905167 | CSAR_peak_  | 38.89,26.43,,- | - |

|      |         |         |            |                |   |
|------|---------|---------|------------|----------------|---|
| chr3 | 4905199 | 4905325 | CSAR_peak_ | 12.6,20.21     | - |
| chr3 | 4905385 | 4905461 | CSAR_peak_ | 15.68,27.11    | - |
| chr3 | 4905509 | 4905596 | CSAR_peak_ | 25.03,44.38    | - |
| chr3 | 4905617 | 4905861 | CSAR_peak_ | 16.34,40.66,-  | - |
| chr3 | 4905907 | 4906010 | CSAR_peak_ | 19.49,28.34    | - |
| chr3 | 4906016 | 4906021 | CSAR_peak_ | 12.13          | - |
| chr3 | 4906128 | 4906246 | CSAR_peak_ | 26.69,18.55    | - |
| chr3 | 4906287 | 4906357 | CSAR_peak_ | 9.58,7.34      | - |
| chr3 | 4906455 | 4906621 | CSAR_peak_ | 38.35,6.95,7.- | - |
| chr3 | 4906695 | 4906862 | CSAR_peak_ | 18.49,8.44,2.- | - |
| chr3 | 4906901 | 4907071 | CSAR_peak_ | 42.87,44.01    | - |
| chr3 | 4907098 | 4907250 | CSAR_peak_ | 42.27,13.37,-  | - |
| chr3 | 4907259 | 4907295 | CSAR_peak_ | 6.61,13.92     | - |
| chr3 | 4907422 | 4907480 | CSAR_peak_ | 17.86,11.45    | - |
| chr3 | 4907515 | 4907571 | CSAR_peak_ | 29.4,9.72      | - |
| chr3 | 4907713 | 4907768 | CSAR_peak_ | 18.65          | - |
| chr3 | 4907847 | 4907893 | CSAR_peak_ | 10.83          | - |
| chr3 | 4954534 | 4954593 | CSAR_peak_ | 6.21           | - |
| chr3 | 4954614 | 4954664 | CSAR_peak_ | 7.58           | - |
| chr3 | 4957672 | 4957722 | CSAR_peak_ | 6.21           | - |
| chr3 | 4957819 | 4957914 | CSAR_peak_ | 12.17,22.56    | - |
| chr3 | 4957997 | 4958000 | CSAR_peak_ | 7.27           | - |
| chr3 | 4958073 | 4958117 | CSAR_peak_ | 7.92           | - |
| chr3 | 4958186 | 4958260 | CSAR_peak_ | 8.14,9.77      | - |
| chr3 | 4958267 | 4958320 | CSAR_peak_ | 17.82          | - |
| chr3 | 4958332 | 4958368 | CSAR_peak_ | 7.27           | - |
| chr3 | 4958445 | 4958593 | CSAR_peak_ | 26.05,26.69    | - |
| chr3 | 4958609 | 4958662 | CSAR_peak_ | 24.21,9.58     | - |
| chr3 | 4958749 | 4958782 | CSAR_peak_ | 7.27           | - |
| chr3 | 4972571 | 4972611 | CSAR_peak_ | 14.88          | - |
| chr3 | 4972620 | 4972714 | CSAR_peak_ | 19.36,6.21     | - |
| chr3 | 4973617 | 4973770 | CSAR_peak_ | 8.39,12.13     | - |
| chr3 | 5042655 | 5042698 | CSAR_peak_ | 8.39           | - |
| chr3 | 5044772 | 5044837 | CSAR_peak_ | 7.27           | - |
| chr3 | 5070592 | 5070637 | CSAR_peak_ | 6.02           | - |
| chr3 | 5092908 | 5092929 | CSAR_peak_ | 5.86           | - |
| chr3 | 5093776 | 5093832 | CSAR_peak_ | 9.58           | - |
| chr3 | 5093930 | 5093972 | CSAR_peak_ | 6.21           | - |
| chr3 | 5094201 | 5094299 | CSAR_peak_ | 7.27,14.88     | - |
| chr3 | 5094367 | 5094428 | CSAR_peak_ | 10.02          | - |
| chr3 | 5094430 | 5094515 | CSAR_peak_ | 5.86           | - |
| chr3 | 5094657 | 5094790 | CSAR_peak_ | 6.81,10.02,9.- | - |

|      |         |         |             |                   |   |
|------|---------|---------|-------------|-------------------|---|
| chr3 | 5094831 | 5094927 | CSAR_peak_  | 8.39              | - |
| chr3 | 5094949 | 5094981 | CSAR_peak_  | 6.21              | - |
| chr3 | 5095146 | 5095224 | CSAR_peak_! | 8.14              | - |
| chr3 | 5127848 | 5127873 | CSAR_peak_  | 6.21              | - |
| chr3 | 5128171 | 5128192 | CSAR_peak_  | 7.27              | - |
| chr3 | 5128280 | 5128311 | CSAR_peak_  | 7.27              | - |
| chr3 | 5129864 | 5129928 | CSAR_peak_  | 6.21,9.77         | - |
| chr3 | 5130397 | 5130451 | CSAR_peak_  | 6.21,9.77         | - |
| chr3 | 5130582 | 5130601 | CSAR_peak_  | 14.88             | - |
| chr3 | 5174508 | 5174561 | CSAR_peak_  | 9.58              | - |
| chr3 | 5174704 | 5174755 | CSAR_peak_  | 7.27              | - |
| chr3 | 5174778 | 5174909 | CSAR_peak_  | 8.39,12.13        | - |
| chr3 | 5180876 | 5180937 | CSAR_peak_  | 35.83,7.7         | - |
| chr3 | 5181020 | 5181068 | CSAR_peak_  | 10.83,12.17       | - |
| chr3 | 5181276 | 5181322 | CSAR_peak_  | 14.88,9.58        | - |
| chr3 | 5216125 | 5216179 | CSAR_peak_  | 7.34              | - |
| chr3 | 5216718 | 5216875 | CSAR_peak_  | 24.52,32.46       | - |
| chr3 | 5218488 | 5218552 | CSAR_peak_  | 14.88,9.58        | - |
| chr3 | 5218897 | 5218964 | CSAR_peak_  | 7.27              | - |
| chr3 | 5226272 | 5226323 | CSAR_peak_  | 6.21              | - |
| chr3 | 5226926 | 5226997 | CSAR_peak_  | 6.21              | - |
| chr3 | 5249322 | 5249375 | CSAR_peak_  | 10.83             | - |
| chr3 | 5250401 | 5250539 | CSAR_peak_  | 12.13,9.58        | - |
| chr3 | 5250546 | 5250681 | CSAR_peak_! | 10.62,30.8,30.8   | - |
| chr3 | 5250745 | 5250791 | CSAR_peak_  | 14.76             | - |
| chr3 | 5250928 | 5250951 | CSAR_peak_  | 6.21              | - |
| chr3 | 5251067 | 5251175 | CSAR_peak_  | 23.49,7.68,14.88  | - |
| chr3 | 5251204 | 5251251 | CSAR_peak_  | 8.39              | - |
| chr3 | 5251354 | 5251507 | CSAR_peak_  | 17.82,14.88,10.83 | - |
| chr3 | 5251521 | 5251582 | CSAR_peak_! | 6.81,6.21,10.83   | - |
| chr3 | 5251673 | 5251712 | CSAR_peak_  | 8.65              | - |
| chr3 | 5251745 | 5251798 | CSAR_peak_  | 9.58              | - |
| chr3 | 5251989 | 5252077 | CSAR_peak_  | 20.43             | - |
| chr3 | 5252796 | 5252857 | CSAR_peak_  | 8.13,10.31        | - |
| chr3 | 5252884 | 5252933 | CSAR_peak_  | 12.13             | - |
| chr3 | 5253158 | 5253281 | CSAR_peak_  | 13.47,23.03,10.83 | - |
| chr3 | 5253331 | 5253439 | CSAR_peak_  | 10.83,7.68        | - |
| chr3 | 5253458 | 5253518 | CSAR_peak_  | 10.68             | - |
| chr3 | 5253549 | 5253627 | CSAR_peak_  | 11.66,10.96       | - |
| chr3 | 5253629 | 5253654 | CSAR_peak_  | 6.03              | - |
| chr3 | 5253701 | 5253930 | CSAR_peak_  | 15.2,13.85        | - |
| chr3 | 5254111 | 5254229 | CSAR_peak_  | 12.31,28.21       | - |



|      |         |         |            |               |   |
|------|---------|---------|------------|---------------|---|
| chr3 | 5274607 | 5274687 | CSAR_peak_ | 9.58,7.27     | - |
| chr3 | 5290245 | 5290295 | CSAR_peak_ | 9.58          | - |
| chr3 | 5290526 | 5290701 | CSAR_peak_ | 9.58,7.27,14. | - |
| chr3 | 5290768 | 5290956 | CSAR_peak_ | 9.58,10.95,9. | - |
| chr3 | 5291134 | 5291312 | CSAR_peak_ | 15.43,12.27   | - |
| chr3 | 5291510 | 5291550 | CSAR_peak_ | 7.58,31.73    | - |
| chr3 | 5291640 | 5291747 | CSAR_peak_ | 30.81,21.94,  | - |
| chr3 | 5291898 | 5291952 | CSAR_peak_ | 7.27          | - |
| chr3 | 5291960 | 5292043 | CSAR_peak_ | 25.62,24.21   | - |
| chr3 | 5292342 | 5292396 | CSAR_peak_ | 8.39          | - |
| chr3 | 5292563 | 5292630 | CSAR_peak_ | 7.27          | - |
| chr3 | 5292729 | 5292784 | CSAR_peak_ | 12.74,7.27    | - |
| chr3 | 5292885 | 5292961 | CSAR_peak_ | 7.27          | - |
| chr3 | 5293254 | 5293319 | CSAR_peak_ | 25.91,16.08   | - |
| chr3 | 5293481 | 5293716 | CSAR_peak_ | 6.22,5.86,10. | - |
| chr3 | 5293828 | 5293928 | CSAR_peak_ | 36.78,25.1    | - |
| chr3 | 5294004 | 5294068 | CSAR_peak_ | 14.88,7.27    | - |
| chr3 | 5294231 | 5294340 | CSAR_peak_ | 19.93,12.61   | - |
| chr3 | 5294383 | 5294489 | CSAR_peak_ | 13.51,33.47   | - |
| chr3 | 5294570 | 5294677 | CSAR_peak_ | 9.58,6.87,7.3 | - |
| chr3 | 5294733 | 5294843 | CSAR_peak_ | 87.52,25.34   | - |
| chr3 | 5294860 | 5294919 | CSAR_peak_ | 6.21          | - |
| chr3 | 5295300 | 5295361 | CSAR_peak_ | 6.85          | - |
| chr3 | 5295380 | 5295417 | CSAR_peak_ | 9.58          | - |
| chr3 | 5295435 | 5295514 | CSAR_peak_ | 16.77,12.13   | - |
| chr3 | 5295527 | 5295631 | CSAR_peak_ | 14.85,23.89   | - |
| chr3 | 5295720 | 5295741 | CSAR_peak_ | 6.21          | - |
| chr3 | 5295801 | 5295869 | CSAR_peak_ | 22.56,8.39    | - |
| chr3 | 5296026 | 5296069 | CSAR_peak_ | 6.21          | - |
| chr3 | 5296097 | 5296188 | CSAR_peak_ | 8.2,14.76     | - |
| chr3 | 5296189 | 5296216 | CSAR_peak_ | 8.28          | - |
| chr3 | 5296248 | 5296303 | CSAR_peak_ | 12.17         | - |
| chr3 | 5296453 | 5296494 | CSAR_peak_ | 7.27          | - |
| chr3 | 5296516 | 5296563 | CSAR_peak_ | 9.58          | - |
| chr3 | 5296711 | 5296819 | CSAR_peak_ | 10.7,12.13    | - |
| chr3 | 5296896 | 5296939 | CSAR_peak_ | 9.58          | - |
| chr3 | 5296944 | 5297282 | CSAR_peak_ | 21.68,18.35,  | - |
| chr3 | 5297284 | 5297398 | CSAR_peak_ | 20.13,21.22   | - |
| chr3 | 5348133 | 5348270 | CSAR_peak_ | 22.58,26.05   | - |
| chr3 | 5348285 | 5348420 | CSAR_peak_ | 14.88,8.39    | - |
| chr3 | 5348912 | 5349031 | CSAR_peak_ | 14.88,28.96   | - |
| chr3 | 5356881 | 5356905 | CSAR_peak_ | 8.39          | - |

|      |         |         |            |                   |   |
|------|---------|---------|------------|-------------------|---|
| chr3 | 5356958 | 5357054 | CSAR_peak_ | 31.2,35.24        | - |
| chr3 | 5357398 | 5357462 | CSAR_peak_ | 29.4,12.13        | - |
| chr3 | 5357466 | 5357537 | CSAR_peak_ | 16.08,9.77        | - |
| chr3 | 5357811 | 5357845 | CSAR_peak_ | 6.57              | - |
| chr3 | 5357997 | 5358072 | CSAR_peak_ | 6.57,9.27         | - |
| chr3 | 5358144 | 5358287 | CSAR_peak_ | 9.58,22.56,20.13  | - |
| chr3 | 5358346 | 5358435 | CSAR_peak_ | 8.39,5.86,14.13   | - |
| chr3 | 5362911 | 5362953 | CSAR_peak_ | 8.39              | - |
| chr3 | 5364244 | 5364356 | CSAR_peak_ | 16.33,20.94       | - |
| chr3 | 5364690 | 5364730 | CSAR_peak_ | 7.27              | - |
| chr3 | 5364832 | 5364988 | CSAR_peak_ | 10.83,8.39        | - |
| chr3 | 5365148 | 5365189 | CSAR_peak_ | 6.81              | - |
| chr3 | 5365358 | 5365411 | CSAR_peak_ | 7.89,6.1          | - |
| chr3 | 5365876 | 5365941 | CSAR_peak_ | 8.39              | - |
| chr3 | 5366370 | 5366431 | CSAR_peak_ | 19.36             | - |
| chr3 | 5366772 | 5366816 | CSAR_peak_ | 10.83             | - |
| chr3 | 5366824 | 5366905 | CSAR_peak_ | 17.37             | - |
| chr3 | 5367013 | 5367112 | CSAR_peak_ | 9.77,8.65,14.13   | - |
| chr3 | 5367459 | 5367562 | CSAR_peak_ | 12.13             | - |
| chr3 | 5367637 | 5367683 | CSAR_peak_ | 12.17             | - |
| chr3 | 5367777 | 5367894 | CSAR_peak_ | 17.82,8.13        | - |
| chr3 | 5368228 | 5368293 | CSAR_peak_ | 14.76,14.85       | - |
| chr3 | 5368366 | 5368378 | CSAR_peak_ | 6.03              | - |
| chr3 | 5368838 | 5368884 | CSAR_peak_ | 7.58,29.2         | - |
| chr3 | 5369026 | 5369104 | CSAR_peak_ | 14.22,10.83,14.13 | - |
| chr3 | 5369863 | 5369976 | CSAR_peak_ | 12.13,18.95       | - |
| chr3 | 5370499 | 5370507 | CSAR_peak_ | 9.58              | - |
| chr3 | 5370825 | 5370883 | CSAR_peak_ | 12.13,9.58        | - |
| chr3 | 5370967 | 5371010 | CSAR_peak_ | 7.27,20.94        | - |
| chr3 | 5371445 | 5371504 | CSAR_peak_ | 13.44,22.69       | - |
| chr3 | 5371520 | 5371536 | CSAR_peak_ | 6.21              | - |
| chr3 | 5383955 | 5384017 | CSAR_peak_ | 7.27              | - |
| chr3 | 5384788 | 5384853 | CSAR_peak_ | 7.92              | - |
| chr3 | 5397595 | 5397722 | CSAR_peak_ | 9.58,13.48,14.13  | - |
| chr3 | 5397807 | 5397829 | CSAR_peak_ | 7.06              | - |
| chr3 | 5397873 | 5397925 | CSAR_peak_ | 5.95              | - |
| chr3 | 5397956 | 5398119 | CSAR_peak_ | 17.28,18.05,14.13 | - |
| chr3 | 5398140 | 5398195 | CSAR_peak_ | 6.87              | - |
| chr3 | 5398253 | 5398335 | CSAR_peak_ | 15.37             | - |
| chr3 | 5398359 | 5398515 | CSAR_peak_ | 20.77,14.13       | - |
| chr3 | 5398583 | 5398650 | CSAR_peak_ | 21.45,8.7         | - |
| chr3 | 5398653 | 5398705 | CSAR_peak_ | 6.36              | - |

|      |         |         |            |               |   |
|------|---------|---------|------------|---------------|---|
| chr3 | 5398793 | 5398823 | CSAR_peak_ | 20.94,18.73   | - |
| chr3 | 5398887 | 5399005 | CSAR_peak_ | 7,26.69,39.3  | - |
| chr3 | 5399028 | 5399080 | CSAR_peak_ | 13.3,25.75    | - |
| chr3 | 5399119 | 5399247 | CSAR_peak_ | 29.2,36.42    | - |
| chr3 | 5399299 | 5399672 | CSAR_peak_ | 21.6,18.4,20. | - |
| chr3 | 5399770 | 5399838 | CSAR_peak_ | 7.9,10.12     | - |
| chr3 | 5399888 | 5399967 | CSAR_peak_ | 14.76,10.83   | - |
| chr3 | 5400027 | 5400164 | CSAR_peak_ | 8.14,18.95,2! | - |
| chr3 | 5400173 | 5400259 | CSAR_peak_ | 5.86,12.44,6. | - |
| chr3 | 5400352 | 5400426 | CSAR_peak_ | 31.67,17.9    | - |
| chr3 | 5400466 | 5400585 | CSAR_peak_ | 21.53,16      | - |
| chr3 | 5400635 | 5400759 | CSAR_peak_ | 6.81,9.11,33. | - |
| chr3 | 5400792 | 5400879 | CSAR_peak_ | 14.73,13.54   | - |
| chr3 | 5400986 | 5401318 | CSAR_peak_ | 12.13,6.81,1! | - |
| chr3 | 5401373 | 5401470 | CSAR_peak_ | 9.54,14.02,9. | - |
| chr3 | 5401539 | 5401633 | CSAR_peak_ | 20.94,6.12,2! | - |
| chr3 | 5401636 | 5401676 | CSAR_peak_ | 9.58          | - |
| chr3 | 5401681 | 5401827 | CSAR_peak_ | 6.21,11.03,5. | - |
| chr3 | 5401843 | 5401945 | CSAR_peak_ | 9.48,12.22    | - |
| chr3 | 5401983 | 5402056 | CSAR_peak_ | 17.82,10.83   | - |
| chr3 | 5402058 | 5402189 | CSAR_peak_ | 14.4,14.96,1! | - |
| chr3 | 5402262 | 5402310 | CSAR_peak_ | 12.54,26.43   | - |
| chr3 | 5402355 | 5402508 | CSAR_peak_ | 28.12,8.14,2! | - |
| chr3 | 5402536 | 5402641 | CSAR_peak_ | 24.21,16.33   | - |
| chr3 | 5411965 | 5412010 | CSAR_peak_ | 7.27          | - |
| chr3 | 5412073 | 5412195 | CSAR_peak_ | 8.14,5.86     | - |
| chr3 | 5412910 | 5412945 | CSAR_peak_ | 9.58          | - |
| chr3 | 5413030 | 5413044 | CSAR_peak_ | 6.57          | - |
| chr3 | 5413690 | 5413732 | CSAR_peak_ | 7.27          | - |
| chr3 | 5414414 | 5414450 | CSAR_peak_ | 12.17         | - |
| chr3 | 5415186 | 5415232 | CSAR_peak_ | 7.58          | - |
| chr3 | 5431113 | 5431201 | CSAR_peak_ | 8.39          | - |
| chr3 | 5431361 | 5431424 | CSAR_peak_ | 7.27          | - |
| chr3 | 5431499 | 5431572 | CSAR_peak_ | 7.27,7.27     | - |
| chr3 | 5431912 | 5431977 | CSAR_peak_ | 17.82,7.58    | - |
| chr3 | 5432453 | 5432504 | CSAR_peak_ | 6.21          | - |
| chr3 | 5432525 | 5432675 | CSAR_peak_ | 7.58,12.17    | - |
| chr3 | 5433183 | 5433227 | CSAR_peak_ | 7.27          | - |
| chr3 | 5468961 | 5469035 | CSAR_peak_ | 12.17,7.27    | - |
| chr3 | 5469397 | 5469440 | CSAR_peak_ | 9.77          | - |
| chr3 | 5507484 | 5507502 | CSAR_peak_ | 8.39          | - |
| chr3 | 5507593 | 5507632 | CSAR_peak_ | 8.39          | - |

|      |         |         |            |             |   |
|------|---------|---------|------------|-------------|---|
| chr3 | 5596107 | 5596159 | CSAR_peak_ | 12.13       | - |
| chr3 | 5596170 | 5596304 | CSAR_peak_ | 14.85,10.83 | - |
| chr3 | 5596306 | 5596377 | CSAR_peak_ | 13.37,20.76 | - |
| chr3 | 5596409 | 5596434 | CSAR_peak_ | 8.14,5.86   | - |
| chr3 | 5596435 | 5596484 | CSAR_peak_ | 12.35,14.34 | - |
| chr3 | 5596518 | 5596586 | CSAR_peak_ | 9.58,24.21  | - |
| chr3 | 5596689 | 5596788 | CSAR_peak_ | 7.34,11.14  | - |
| chr3 | 5596791 | 5596838 | CSAR_peak_ | 8.39        | - |
| chr3 | 5596855 | 5596885 | CSAR_peak_ | 16.77,9.58  | - |
| chr3 | 5596970 | 5597100 | CSAR_peak_ | 10.62,25.91 | - |
| chr3 | 5597145 | 5597156 | CSAR_peak_ | 6.21        | - |
| chr3 | 5597262 | 5597312 | CSAR_peak_ | 7.27        | - |
| chr3 | 5597317 | 5597397 | CSAR_peak_ | 14.88,6.21  | - |
| chr3 | 5597424 | 5597432 | CSAR_peak_ | 12.17       | - |
| chr3 | 5597515 | 5597641 | CSAR_peak_ | 44.46,13.76 | - |
| chr3 | 5597705 | 5597744 | CSAR_peak_ | 6.21        | - |
| chr3 | 5612795 | 5612848 | CSAR_peak_ | 14.88       | - |
| chr3 | 5612912 | 5612969 | CSAR_peak_ | 7.92,7.58   | - |
| chr3 | 5614040 | 5614132 | CSAR_peak_ | 13.48,25.91 | - |
| chr3 | 5618057 | 5618124 | CSAR_peak_ | 7.27        | - |
| chr3 | 5619522 | 5619601 | CSAR_peak_ | 9.58        | - |
| chr3 | 5619609 | 5619630 | CSAR_peak_ | 7.27,9.27   | - |
| chr3 | 5619720 | 5619786 | CSAR_peak_ | 8.39,29.4   | - |
| chr3 | 5619932 | 5619984 | CSAR_peak_ | 12.13       | - |
| chr3 | 5620065 | 5620118 | CSAR_peak_ | 9.58,6.21   | - |
| chr3 | 5624779 | 5624824 | CSAR_peak_ | 8.39        | - |
| chr3 | 5636122 | 5636155 | CSAR_peak_ | 8.2         | - |
| chr3 | 5636713 | 5636749 | CSAR_peak_ | 6.21        | - |
| chr3 | 5637575 | 5637637 | CSAR_peak_ | 7.27        | - |
| chr3 | 5640552 | 5640591 | CSAR_peak_ | 8.39        | - |
| chr3 | 5641671 | 5641725 | CSAR_peak_ | 7.27        | - |
| chr3 | 5642133 | 5642180 | CSAR_peak_ | 7.27        | - |
| chr3 | 5642466 | 5642513 | CSAR_peak_ | 10.83       | - |
| chr3 | 5662786 | 5662843 | CSAR_peak_ | 8.39        | - |
| chr3 | 5662933 | 5662979 | CSAR_peak_ | 19.36,9.58  | - |
| chr3 | 5663417 | 5663519 | CSAR_peak_ | 9.58,8.13   | - |
| chr3 | 5664182 | 5664226 | CSAR_peak_ | 6.21,12.17  | - |
| chr3 | 5664264 | 5664321 | CSAR_peak_ | 9.97        | - |
| chr3 | 5664389 | 5664434 | CSAR_peak_ | 7.27        | - |
| chr3 | 5664779 | 5664846 | CSAR_peak_ | 7.58        | - |
| chr3 | 5665445 | 5665462 | CSAR_peak_ | 10.83       | - |
| chr3 | 5665613 | 5665650 | CSAR_peak_ | 17.82       | - |

|      |         |         |             |                |
|------|---------|---------|-------------|----------------|
| chr3 | 5684585 | 5684717 | CSAR_peak_  | 7.92,9.58,8.3- |
| chr3 | 5685981 | 5686079 | CSAR_peak_  | 10.94,18.73 -  |
| chr3 | 5686119 | 5686179 | CSAR_peak_! | 9.55 -         |
| chr3 | 5686392 | 5686429 | CSAR_peak_  | 7.27 -         |
| chr3 | 5701225 | 5701333 | CSAR_peak_  | 7.27,16.33 -   |
| chr3 | 5701691 | 5701778 | CSAR_peak_  | 13.51,14.88 -  |
| chr3 | 5739041 | 5739101 | CSAR_peak_  | 17.4,6.44 -    |
| chr3 | 5739333 | 5739402 | CSAR_peak_! | 5.86,12.13 -   |
| chr3 | 5740789 | 5740826 | CSAR_peak_  | 7.27 -         |
| chr3 | 5741107 | 5741188 | CSAR_peak_  | 8.39 -         |
| chr3 | 5759860 | 5760046 | CSAR_peak_  | 7.27,20.94,9.- |
| chr3 | 5760101 | 5760196 | CSAR_peak_  | 7.27,6.21 -    |
| chr3 | 5760778 | 5760819 | CSAR_peak_  | 7.27,6.21 -    |
| chr3 | 5760853 | 5760943 | CSAR_peak_  | 7.27 -         |
| chr3 | 5760946 | 5760987 | CSAR_peak_  | 6.21 -         |
| chr3 | 5761034 | 5761064 | CSAR_peak_  | 6.21 -         |
| chr3 | 5761212 | 5761247 | CSAR_peak_  | 7.27 -         |
| chr3 | 5761564 | 5761608 | CSAR_peak_  | 14.88 -        |
| chr3 | 5761657 | 5761751 | CSAR_peak_  | 19.36,23.49 -  |
| chr3 | 5787949 | 5788024 | CSAR_peak_  | 9.58 -         |
| chr3 | 5788127 | 5788148 | CSAR_peak_  | 6.21 -         |
| chr3 | 5802632 | 5802728 | CSAR_peak_  | 8.28 -         |
| chr3 | 5802760 | 5802832 | CSAR_peak_  | 14.88 -        |
| chr3 | 5802839 | 5802933 | CSAR_peak_  | 25.91 -        |
| chr3 | 5803413 | 5803517 | CSAR_peak_  | 27.64,8.09,6.- |
| chr3 | 5803526 | 5803587 | CSAR_peak_  | 9.58 -         |
| chr3 | 5803685 | 5803824 | CSAR_peak_  | 29.4,9.58 -    |
| chr3 | 5803869 | 5803948 | CSAR_peak_  | 9.58,8.16,9.9- |
| chr3 | 5803955 | 5804004 | CSAR_peak_  | 5.9 -          |
| chr3 | 5804080 | 5804101 | CSAR_peak_  | 6.21 -         |
| chr3 | 5804359 | 5804418 | CSAR_peak_  | 10.83 -        |
| chr3 | 5804522 | 5804562 | CSAR_peak_  | 7.27 -         |
| chr3 | 5804756 | 5804791 | CSAR_peak_  | 7.27 -         |
| chr3 | 5805450 | 5805533 | CSAR_peak_  | 7.27 -         |
| chr3 | 5805654 | 5805814 | CSAR_peak_  | 7.27,8.39 -    |
| chr3 | 5806470 | 5806526 | CSAR_peak_  | 6.03 -         |
| chr3 | 5806867 | 5806922 | CSAR_peak_  | 7.27 -         |
| chr3 | 5807407 | 5807482 | CSAR_peak_  | 14.88,6.03 -   |
| chr3 | 5807623 | 5807665 | CSAR_peak_  | 7.27 -         |
| chr3 | 5807795 | 5807861 | CSAR_peak_  | 7.27 -         |
| chr3 | 5807879 | 5807975 | CSAR_peak_! | 6.81,7.58,14.- |
| chr3 | 5808326 | 5808364 | CSAR_peak_  | 8.2 -          |

|      |         |         |            |                   |   |
|------|---------|---------|------------|-------------------|---|
| chr3 | 5808826 | 5808886 | CSAR_peak_ | 10.83,9.58        | - |
| chr3 | 5809407 | 5809682 | CSAR_peak_ | 10.02,7.27,10.83  | - |
| chr3 | 5809809 | 5809904 | CSAR_peak_ | 7.34,6.44         | - |
| chr3 | 5810193 | 5810335 | CSAR_peak_ | 7.27,9.58,6.81    | - |
| chr3 | 5810638 | 5810666 | CSAR_peak_ | 6.85              | - |
| chr3 | 5810667 | 5810761 | CSAR_peak_ | 12.31,6.03,10.83  | - |
| chr3 | 5810906 | 5810977 | CSAR_peak_ | 8.94              | - |
| chr3 | 5811230 | 5811273 | CSAR_peak_ | 10.83             | - |
| chr3 | 5811365 | 5811491 | CSAR_peak_ | 14.76,13.85,10.83 | - |
| chr3 | 5811517 | 5811543 | CSAR_peak_ | 18.1,24.52        | - |
| chr3 | 5811642 | 5811718 | CSAR_peak_ | 26.69,17.82       | - |
| chr3 | 5811777 | 5811876 | CSAR_peak_ | 10.83,6.81,10.83  | - |
| chr3 | 5812027 | 5812128 | CSAR_peak_ | 12.13,17.82       | - |
| chr3 | 5830003 | 5830044 | CSAR_peak_ | 8.9,24.64         | - |
| chr3 | 5830051 | 5830098 | CSAR_peak_ | 18.02,13.67,10.83 | - |
| chr3 | 5830163 | 5830243 | CSAR_peak_ | 32.89,16.55,10.83 | - |
| chr3 | 5830282 | 5830377 | CSAR_peak_ | 27.03,16.04,10.83 | - |
| chr3 | 5890636 | 5890697 | CSAR_peak_ | 7.27,8.39         | - |
| chr3 | 5890773 | 5890828 | CSAR_peak_ | 17.82             | - |
| chr3 | 5891355 | 5891407 | CSAR_peak_ | 8.39              | - |
| chr3 | 5911144 | 5911208 | CSAR_peak_ | 8.39              | - |
| chr3 | 5912058 | 5912117 | CSAR_peak_ | 13.48             | - |
| chr3 | 5918539 | 5918588 | CSAR_peak_ | 7.58              | - |
| chr3 | 5920973 | 5920992 | CSAR_peak_ | 12.13             | - |
| chr3 | 5921175 | 5921198 | CSAR_peak_ | 9.58              | - |
| chr3 | 5948694 | 5948789 | CSAR_peak_ | 12.13             | - |
| chr3 | 5952507 | 5952611 | CSAR_peak_ | 18.65,9.58        | - |
| chr3 | 5952620 | 5952715 | CSAR_peak_ | 6.03,23.03        | - |
| chr3 | 5952774 | 5952843 | CSAR_peak_ | 8.39,7.78         | - |
| chr3 | 5952996 | 5953087 | CSAR_peak_ | 12.31             | - |
| chr3 | 5953147 | 5953237 | CSAR_peak_ | 29.4,10.31        | - |
| chr3 | 5953249 | 5953470 | CSAR_peak_ | 23.49,9.58,10.83  | - |
| chr3 | 5953530 | 5953692 | CSAR_peak_ | 10.83,32.94       | - |
| chr3 | 5953731 | 5953774 | CSAR_peak_ | 8.39              | - |
| chr3 | 5953786 | 5953865 | CSAR_peak_ | 6.95              | - |
| chr3 | 5970302 | 5970362 | CSAR_peak_ | 6.12,7.31         | - |
| chr3 | 5970419 | 5970501 | CSAR_peak_ | 13.92,10.83,10.83 | - |
| chr3 | 5970548 | 5970632 | CSAR_peak_ | 11.03,12.17,10.83 | - |
| chr3 | 5971581 | 5971675 | CSAR_peak_ | 7.27,7.27         | - |
| chr3 | 5971913 | 5971999 | CSAR_peak_ | 10.02             | - |
| chr3 | 5975223 | 5975283 | CSAR_peak_ | 6.21              | - |
| chr3 | 5989302 | 5989414 | CSAR_peak_ | 7.78,6.11,8.11    | - |

|      |         |         |             |                |   |
|------|---------|---------|-------------|----------------|---|
| chr3 | 5989671 | 5989690 | CSAR_peak_! | 6.81           | - |
| chr3 | 5989781 | 5989898 | CSAR_peak_! | 7,9.61,16.11,  | - |
| chr3 | 5989970 | 5990019 | CSAR_peak_! | 7.27,8.39      | - |
| chr3 | 5990022 | 5990093 | CSAR_peak_! | 8.95           | - |
| chr3 | 5990178 | 5990270 | CSAR_peak_! | 18.85,7.27     | - |
| chr3 | 5990291 | 5990400 | CSAR_peak_! | 23.03          | - |
| chr3 | 5990498 | 5990587 | CSAR_peak_! | 11.14,12.13    | - |
| chr3 | 5990600 | 5990674 | CSAR_peak_! | 6.21           | - |
| chr3 | 5990785 | 5990842 | CSAR_peak_! | 10.83          | - |
| chr3 | 5990918 | 5990973 | CSAR_peak_! | 8.65           | - |
| chr3 | 5991005 | 5991026 | CSAR_peak_! | 8.28,19.36     | - |
| chr3 | 5991111 | 5991212 | CSAR_peak_! | 22.09,35.83    | - |
| chr3 | 5992277 | 5992340 | CSAR_peak_! | 7.68,16.11     | - |
| chr3 | 5992512 | 5992555 | CSAR_peak_! | 7.27           | - |
| chr3 | 6070823 | 6070971 | CSAR_peak_! | 7.27           | - |
| chr3 | 6071680 | 6071726 | CSAR_peak_! | 6.21           | - |
| chr3 | 6081877 | 6081942 | CSAR_peak_! | 13.66,7.58     | - |
| chr3 | 6082010 | 6082062 | CSAR_peak_! | 7.58           | - |
| chr3 | 6082071 | 6082137 | CSAR_peak_! | 7.27           | - |
| chr3 | 6082195 | 6082306 | CSAR_peak_! | 6.21,10.31     | - |
| chr3 | 6082379 | 6082468 | CSAR_peak_! | 8.39,8.39,8.0- | - |
| chr3 | 6082474 | 6082492 | CSAR_peak_! | 9.58           | - |
| chr3 | 6082576 | 6082627 | CSAR_peak_! | 14.88,22.56    | - |
| chr3 | 6082749 | 6082825 | CSAR_peak_! | 9.58           | - |
| chr3 | 6082945 | 6082989 | CSAR_peak_! | 9.58,9.41      | - |
| chr3 | 6083144 | 6083194 | CSAR_peak_! | 8.39           | - |
| chr3 | 6083224 | 6083288 | CSAR_peak_! | 14.88          | - |
| chr3 | 6083452 | 6083558 | CSAR_peak_! | 7.27,8.39      | - |
| chr3 | 6083669 | 6083767 | CSAR_peak_! | 7.58,13.44     | - |
| chr3 | 6084157 | 6084171 | CSAR_peak_! | 7.56           | - |
| chr3 | 6084253 | 6084393 | CSAR_peak_! | 36.5,9.02,10.- | - |
| chr3 | 6084523 | 6084633 | CSAR_peak_! | 13.44          | - |
| chr3 | 6084688 | 6084697 | CSAR_peak_! | 7.27           | - |
| chr3 | 6084734 | 6084792 | CSAR_peak_! | 11.32          | - |
| chr3 | 6084841 | 6084913 | CSAR_peak_! | 7.26,10.88     | - |
| chr3 | 6085005 | 6085096 | CSAR_peak_! | 13.95,26.54    | - |
| chr3 | 6085148 | 6085164 | CSAR_peak_! | 7.34           | - |
| chr3 | 6085169 | 6085245 | CSAR_peak_! | 9.97,11.38     | - |
| chr3 | 6085281 | 6085479 | CSAR_peak_! | 17.37,11.96,-  | - |
| chr3 | 6087104 | 6087190 | CSAR_peak_! | 9.58,11.03,8.- | - |
| chr3 | 6087195 | 6087246 | CSAR_peak_! | 6.21           | - |
| chr3 | 6087466 | 6087509 | CSAR_peak_! | 9.58           | - |

|      |         |         |            |                |
|------|---------|---------|------------|----------------|
| chr3 | 6087786 | 6088004 | CSAR_peak_ | 31.2,18.95,9.- |
| chr3 | 6088014 | 6088064 | CSAR_peak_ | 9.58 -         |
| chr3 | 6088780 | 6088828 | CSAR_peak_ | 7.27 -         |
| chr3 | 6088959 | 6089129 | CSAR_peak_ | 25.91,21.56 -  |
| chr3 | 6089218 | 6089269 | CSAR_peak_ | 7.27 -         |
| chr3 | 6089611 | 6089674 | CSAR_peak_ | 8.84 -         |
| chr3 | 6089694 | 6090023 | CSAR_peak_ | 9.58,31.72,4.- |
| chr3 | 6090108 | 6090602 | CSAR_peak_ | 38.71,47.2,2.- |
| chr3 | 6090750 | 6090822 | CSAR_peak_ | 11.75,15.96 -  |
| chr3 | 6090867 | 6091004 | CSAR_peak_ | 27.94,5.92 -   |
| chr3 | 6091014 | 6091184 | CSAR_peak_ | 62.74,7.27,5.- |
| chr3 | 6091196 | 6091869 | CSAR_peak_ | 52.01,38.64 -  |
| chr3 | 6091887 | 6092017 | CSAR_peak_ | 22.06,49.31 -  |
| chr3 | 6092031 | 6092631 | CSAR_peak_ | 16.55,58.38,-  |
| chr3 | 6092705 | 6092927 | CSAR_peak_ | 44.96,8.2,28.- |
| chr3 | 6092961 | 6093017 | CSAR_peak_ | 22.58,6.03 -   |
| chr3 | 6109269 | 6109322 | CSAR_peak_ | 10.95 -        |
| chr3 | 6109414 | 6109483 | CSAR_peak_ | 24.21,9.58 -   |
| chr3 | 6109550 | 6109609 | CSAR_peak_ | 8.39 -         |
| chr3 | 6110351 | 6110399 | CSAR_peak_ | 14.88,10.83 -  |
| chr3 | 6110560 | 6110587 | CSAR_peak_ | 6.57 -         |
| chr3 | 6110642 | 6110725 | CSAR_peak_ | 12.13,6.21 -   |
| chr3 | 6110807 | 6110864 | CSAR_peak_ | 9.77,6.57,6.2- |
| chr3 | 6110942 | 6111000 | CSAR_peak_ | 11.07,12.74,-  |
| chr3 | 6111099 | 6111179 | CSAR_peak_ | 13.48,7.58 -   |
| chr3 | 6111404 | 6111490 | CSAR_peak_ | 13.48 -        |
| chr3 | 6111788 | 6111929 | CSAR_peak_ | 9.77 -         |
| chr3 | 6112106 | 6112193 | CSAR_peak_ | 7.27,9.58 -    |
| chr3 | 6112295 | 6112371 | CSAR_peak_ | 6.81 -         |
| chr3 | 6112512 | 6112587 | CSAR_peak_ | 12.13 -        |
| chr3 | 6112738 | 6112817 | CSAR_peak_ | 10.83,9.41,6.- |
| chr3 | 6112836 | 6112982 | CSAR_peak_ | 7.58,11.63,6.- |
| chr3 | 6113126 | 6113193 | CSAR_peak_ | 77.9,27.61 -   |
| chr3 | 6113393 | 6113451 | CSAR_peak_ | 9.77 -         |
| chr3 | 6113513 | 6113596 | CSAR_peak_ | 7.92 -         |
| chr3 | 6113619 | 6113676 | CSAR_peak_ | 7.92 -         |
| chr3 | 6113806 | 6113859 | CSAR_peak_ | 7.27 -         |
| chr3 | 6114072 | 6114135 | CSAR_peak_ | 9.58,8.39 -    |
| chr3 | 6114234 | 6114270 | CSAR_peak_ | 6.21 -         |
| chr3 | 6114586 | 6114746 | CSAR_peak_ | 22.56,17.82 -  |
| chr3 | 6115112 | 6115177 | CSAR_peak_ | 17.82,10.83 -  |
| chr3 | 6115523 | 6115575 | CSAR_peak_ | 16.33,7.58 -   |



|      |         |         |            |               |   |
|------|---------|---------|------------|---------------|---|
| chr3 | 6115602 | 6115696 | CSAR_peak_ | 10.02,10.94   | - |
| chr3 | 6115779 | 6115819 | CSAR_peak_ | 9.58          | - |
| chr3 | 6116286 | 6116346 | CSAR_peak_ | 7.27,7.27     | - |
| chr3 | 6127901 | 6128038 | CSAR_peak_ | 6.53,6.3,11.2 | - |
| chr3 | 6142320 | 6142402 | CSAR_peak_ | 8.95,12.17    | - |
| chr3 | 6142730 | 6142787 | CSAR_peak_ | 6.44,5.62     | - |
| chr3 | 6143158 | 6143208 | CSAR_peak_ | 7.27          | - |
| chr3 | 6169772 | 6169833 | CSAR_peak_ | 13,7.27       | - |
| chr3 | 6170381 | 6170421 | CSAR_peak_ | 7.27          | - |
| chr3 | 6170653 | 6170710 | CSAR_peak_ | 8.39          | - |
| chr3 | 6349130 | 6349175 | CSAR_peak_ | 9.58          | - |
| chr3 | 6350009 | 6350101 | CSAR_peak_ | 6.21          | - |
| chr3 | 6373900 | 6373928 | CSAR_peak_ | 7.27          | - |
| chr3 | 6374842 | 6374894 | CSAR_peak_ | 12.13         | - |
| chr3 | 6375907 | 6375962 | CSAR_peak_ | 8.39          | - |
| chr3 | 6376655 | 6376705 | CSAR_peak_ | 7.58          | - |
| chr3 | 6377043 | 6377127 | CSAR_peak_ | 7.27,7.27     | - |
| chr3 | 6488934 | 6489076 | CSAR_peak_ | 17.82         | - |
| chr3 | 6489102 | 6489152 | CSAR_peak_ | 7.58,6.21     | - |
| chr3 | 6489167 | 6489240 | CSAR_peak_ | 10.83,6.57    | - |
| chr3 | 6489327 | 6489360 | CSAR_peak_ | 6.95          | - |
| chr3 | 6489815 | 6489871 | CSAR_peak_ | 8.39,7.27,6.8 | - |
| chr3 | 6489977 | 6489996 | CSAR_peak_ | 7.27          | - |
| chr3 | 6490048 | 6490138 | CSAR_peak_ | 8.39,6.21     | - |
| chr3 | 6490172 | 6490222 | CSAR_peak_ | 7.27          | - |
| chr3 | 6490257 | 6490330 | CSAR_peak_ | 7.27,10.83    | - |
| chr3 | 6490645 | 6490705 | CSAR_peak_ | 8.39          | - |
| chr3 | 6490764 | 6490908 | CSAR_peak_ | 17.82,14.88   | - |
| chr3 | 6549029 | 6549115 | CSAR_peak_ | 10.83,8.39    | - |
| chr3 | 6549173 | 6549250 | CSAR_peak_ | 7.58          | - |
| chr3 | 6549502 | 6549568 | CSAR_peak_ | 7.27,8.39     | - |
| chr3 | 6550216 | 6550302 | CSAR_peak_ | 8.39          | - |
| chr3 | 6553681 | 6553717 | CSAR_peak_ | 6.21          | - |
| chr3 | 6553909 | 6553962 | CSAR_peak_ | 9.58          | - |
| chr3 | 6553999 | 6554212 | CSAR_peak_ | 33.03,8.39,8. | - |
| chr3 | 6554300 | 6554339 | CSAR_peak_ | 6.21          | - |
| chr3 | 6554557 | 6554676 | CSAR_peak_ | 18.95         | - |
| chr3 | 6554947 | 6555033 | CSAR_peak_ | 23.95,8.39    | - |
| chr3 | 6555281 | 6555333 | CSAR_peak_ | 19.36         | - |
| chr3 | 6555511 | 6555567 | CSAR_peak_ | 10.83         | - |
| chr3 | 6555694 | 6555774 | CSAR_peak_ | 10.83,19.36   | - |
| chr3 | 6556187 | 6556253 | CSAR_peak_ | 7.58          | - |

|      |         |         |            |                |   |
|------|---------|---------|------------|----------------|---|
| chr3 | 6556404 | 6556474 | CSAR_peak_ | 14.88,16.23    | - |
| chr3 | 6556498 | 6556594 | CSAR_peak_ | 26.43,17.37    | - |
| chr3 | 6556653 | 6556815 | CSAR_peak_ | 30.26,6.21,6.  | - |
| chr3 | 6556890 | 6557000 | CSAR_peak_ | 10.83,8.39     | - |
| chr3 | 6557325 | 6557365 | CSAR_peak_ | 6.21           | - |
| chr3 | 6557512 | 6557568 | CSAR_peak_ | 16.08,6.28     | - |
| chr3 | 6557600 | 6557678 | CSAR_peak_ | 16.11,6.03     | - |
| chr3 | 6557689 | 6557779 | CSAR_peak_ | 6.21,8.39      | - |
| chr3 | 6563938 | 6564003 | CSAR_peak_ | 11.66,12.13    | - |
| chr3 | 6564009 | 6564093 | CSAR_peak_ | 7.58           | - |
| chr3 | 6564197 | 6564324 | CSAR_peak_ | 20.43,13.51    | - |
| chr3 | 6564361 | 6564420 | CSAR_peak_ | 31.19,16.33    | - |
| chr3 | 6609782 | 6609846 | CSAR_peak_ | 13.48          | - |
| chr3 | 6611267 | 6611359 | CSAR_peak_ | 12.13          | - |
| chr3 | 6611405 | 6611604 | CSAR_peak_ | 8.3,8.89,12.1- | - |
| chr3 | 6611855 | 6611915 | CSAR_peak_ | 13.35,13.72    | - |
| chr3 | 6611946 | 6612124 | CSAR_peak_ | 9.58,14.88,8.- | - |
| chr3 | 6612141 | 6612212 | CSAR_peak_ | 14.93,20.05    | - |
| chr3 | 6612280 | 6612375 | CSAR_peak_ | 12.13,16.19    | - |
| chr3 | 6612387 | 6612469 | CSAR_peak_ | 21.94,12.17    | - |
| chr3 | 6612560 | 6612657 | CSAR_peak_ | 12.35,11.66    | - |
| chr3 | 6612788 | 6612856 | CSAR_peak_ | 14.88,6.95     | - |
| chr3 | 6613210 | 6613262 | CSAR_peak_ | 14.88          | - |
| chr3 | 6613478 | 6613522 | CSAR_peak_ | 6.02           | - |
| chr3 | 6613777 | 6613852 | CSAR_peak_ | 18.65,27.64    | - |
| chr3 | 6613879 | 6613933 | CSAR_peak_ | 10.94,14.88    | - |
| chr3 | 6616947 | 6616989 | CSAR_peak_ | 6.21           | - |
| chr3 | 6617012 | 6617097 | CSAR_peak_ | 13.29,6.81     | - |
| chr3 | 6625804 | 6625865 | CSAR_peak_ | 6.21,7.27      | - |
| chr3 | 6626929 | 6626971 | CSAR_peak_ | 6.03           | - |
| chr3 | 6627866 | 6627926 | CSAR_peak_ | 7.58           | - |
| chr3 | 6629094 | 6629166 | CSAR_peak_ | 12.13          | - |
| chr3 | 6630606 | 6630646 | CSAR_peak_ | 7.27           | - |
| chr3 | 6669679 | 6669739 | CSAR_peak_ | 6.21           | - |
| chr3 | 6701518 | 6701600 | CSAR_peak_ | 6.81           | - |
| chr3 | 6701694 | 6701721 | CSAR_peak_ | 5.86           | - |
| chr3 | 6702724 | 6702823 | CSAR_peak_ | 10.95          | - |
| chr3 | 6703750 | 6703811 | CSAR_peak_ | 10.83          | - |
| chr3 | 6757270 | 6757281 | CSAR_peak_ | 6.21           | - |
| chr3 | 6763140 | 6763351 | CSAR_peak_ | 7.27,10.83,1:- | - |
| chr3 | 6763867 | 6763935 | CSAR_peak_ | 7.27           | - |
| chr3 | 6764439 | 6764532 | CSAR_peak_ | 13.48          | - |

|      |         |         |            |               |   |
|------|---------|---------|------------|---------------|---|
| chr3 | 6764708 | 6764822 | CSAR_peak_ | 8.39,7.27     | - |
| chr3 | 6765111 | 6765169 | CSAR_peak_ | 7.58          | - |
| chr3 | 6765442 | 6765597 | CSAR_peak_ | 8.39,10.83    | - |
| chr3 | 6765825 | 6765891 | CSAR_peak_ | 6.21          | - |
| chr3 | 6765937 | 6765992 | CSAR_peak_ | 13.48         | - |
| chr3 | 6766032 | 6766124 | CSAR_peak_ | 12.13         | - |
| chr3 | 6766910 | 6766960 | CSAR_peak_ | 12.13,9.58    | - |
| chr3 | 6767052 | 6767126 | CSAR_peak_ | 10.02,26.69   | - |
| chr3 | 6767475 | 6767525 | CSAR_peak_ | 8.39          | - |
| chr3 | 6768015 | 6768056 | CSAR_peak_ | 6.21          | - |
| chr3 | 6768118 | 6768170 | CSAR_peak_ | 6.21          | - |
| chr3 | 6768560 | 6768606 | CSAR_peak_ | 8.39          | - |
| chr3 | 6769370 | 6769417 | CSAR_peak_ | 12.13,6.03    | - |
| chr3 | 6769815 | 6769871 | CSAR_peak_ | 12.13,5.86    | - |
| chr3 | 6791810 | 6791951 | CSAR_peak_ | 14.88         | - |
| chr3 | 6803031 | 6803091 | CSAR_peak_ | 14.88,24.21   | - |
| chr3 | 6803370 | 6803514 | CSAR_peak_ | 14.25,22.74   | - |
| chr3 | 6803537 | 6803570 | CSAR_peak_ | 10.02         | - |
| chr3 | 6803780 | 6803874 | CSAR_peak_ | 10.83         | - |
| chr3 | 6828680 | 6828719 | CSAR_peak_ | 6.57          | - |
| chr3 | 6828759 | 6828871 | CSAR_peak_ | 6.37,9.58     | - |
| chr3 | 6828952 | 6828962 | CSAR_peak_ | 14,10.94      | - |
| chr3 | 6829232 | 6829312 | CSAR_peak_ | 17.4,14.59    | - |
| chr3 | 6830057 | 6830156 | CSAR_peak_ | 7.58,10.95    | - |
| chr3 | 6830551 | 6830560 | CSAR_peak_ | 6.1           | - |
| chr3 | 6830838 | 6830887 | CSAR_peak_ | 11.38         | - |
| chr3 | 6831031 | 6831116 | CSAR_peak_ | 8.65,12.13    | - |
| chr3 | 6831356 | 6831442 | CSAR_peak_ | 9.03          | - |
| chr3 | 6831959 | 6832073 | CSAR_peak_ | 9.55,9.58,6.8 | - |
| chr3 | 6832321 | 6832371 | CSAR_peak_ | 6.81,9.58     | - |
| chr3 | 6832594 | 6832672 | CSAR_peak_ | 9.58,8.14     | - |
| chr3 | 6832729 | 6832809 | CSAR_peak_ | 18.95         | - |
| chr3 | 6832903 | 6833023 | CSAR_peak_ | 20.94,9.77    | - |
| chr3 | 6833108 | 6833171 | CSAR_peak_ | 12.95         | - |
| chr3 | 6833283 | 6833334 | CSAR_peak_ | 6.21          | - |
| chr3 | 6833697 | 6833760 | CSAR_peak_ | 10.31,6.21    | - |
| chr3 | 6833858 | 6833911 | CSAR_peak_ | 12.17,6.45    | - |
| chr3 | 6834526 | 6834569 | CSAR_peak_ | 7.27,6.21     | - |
| chr3 | 6835631 | 6835682 | CSAR_peak_ | 12.13         | - |
| chr3 | 6847155 | 6847211 | CSAR_peak_ | 9.77          | - |
| chr3 | 6847258 | 6847352 | CSAR_peak_ | 6.72,14.34,1  | - |
| chr3 | 6847424 | 6847519 | CSAR_peak_ | 8.39,9.58     | - |

|      |         |         |            |               |   |
|------|---------|---------|------------|---------------|---|
| chr3 | 6847663 | 6847738 | CSAR_peak_ | 10.31,10.31   | - |
| chr3 | 6847870 | 6848000 | CSAR_peak_ | 9.77,17.82,7. | - |
| chr3 | 6848054 | 6848169 | CSAR_peak_ | 10.31,9.58    | - |
| chr3 | 6848514 | 6848597 | CSAR_peak_ | 7.27          | - |
| chr3 | 6848685 | 6848774 | CSAR_peak_ | 25.07,8.39    | - |
| chr3 | 6849044 | 6849094 | CSAR_peak_ | 9.58          | - |
| chr3 | 6849211 | 6849290 | CSAR_peak_ | 9.58          | - |
| chr3 | 6851082 | 6851134 | CSAR_peak_ | 9.58          | - |
| chr3 | 6851320 | 6851382 | CSAR_peak_ | 6.21          | - |
| chr3 | 6851498 | 6851546 | CSAR_peak_ | 7.27          | - |
| chr3 | 6852417 | 6852486 | CSAR_peak_ | 7.58,8.39     | - |
| chr3 | 6852819 | 6852891 | CSAR_peak_ | 13.51,6.03    | - |
| chr3 | 6853788 | 6853855 | CSAR_peak_ | 12.94,8.14,2. | - |
| chr3 | 6853976 | 6854030 | CSAR_peak_ | 12.31,5.86    | - |
| chr3 | 6854071 | 6854106 | CSAR_peak_ | 6.57          | - |
| chr3 | 6854182 | 6854237 | CSAR_peak_ | 13.48         | - |
| chr3 | 6854480 | 6854526 | CSAR_peak_ | 7.58,5.86     | - |
| chr3 | 6854698 | 6854739 | CSAR_peak_ | 7.27,6.21     | - |
| chr3 | 6855258 | 6855320 | CSAR_peak_ | 6.21          | - |
| chr3 | 6855359 | 6855402 | CSAR_peak_ | 14.88         | - |
| chr3 | 6855970 | 6856046 | CSAR_peak_ | 8.39          | - |
| chr3 | 6858522 | 6858568 | CSAR_peak_ | 11.38         | - |
| chr3 | 6860093 | 6860152 | CSAR_peak_ | 10.83         | - |
| chr3 | 6860922 | 6860955 | CSAR_peak_ | 7.27          | - |
| chr3 | 6861199 | 6861280 | CSAR_peak_ | 17.82,11.14   | - |
| chr3 | 6861774 | 6861841 | CSAR_peak_ | 6.21          | - |
| chr3 | 6879908 | 6880025 | CSAR_peak_ | 14.76,19.96   | - |
| chr3 | 6880375 | 6880423 | CSAR_peak_ | 7.27,9.58     | - |
| chr3 | 6880747 | 6880825 | CSAR_peak_ | 6.44,7.92     | - |
| chr3 | 6881283 | 6881366 | CSAR_peak_ | 11.28,5.79    | - |
| chr3 | 6881401 | 6881471 | CSAR_peak_ | 7.92,11.66    | - |
| chr3 | 6881584 | 6881645 | CSAR_peak_ | 13.51         | - |
| chr3 | 6884120 | 6884172 | CSAR_peak_ | 6.21          | - |
| chr3 | 6884772 | 6884851 | CSAR_peak_ | 9.58          | - |
| chr3 | 6885373 | 6885422 | CSAR_peak_ | 9.58          | - |
| chr3 | 6886896 | 6887016 | CSAR_peak_ | 8.14,7.27     | - |
| chr3 | 6887640 | 6887711 | CSAR_peak_ | 7.27,8.65     | - |
| chr3 | 6887854 | 6887914 | CSAR_peak_ | 9.58          | - |
| chr3 | 6888218 | 6888329 | CSAR_peak_ | 10.95,5.86    | - |
| chr3 | 6888336 | 6888374 | CSAR_peak_ | 7.27          | - |
| chr3 | 6888501 | 6888536 | CSAR_peak_ | 7.27          | - |
| chr3 | 6888705 | 6888816 | CSAR_peak_ | 21.94,10.02   | - |

|      |         |         |            |             |   |
|------|---------|---------|------------|-------------|---|
| chr3 | 6888843 | 6888888 | CSAR_peak_ | 7.27        | - |
| chr3 | 6889151 | 6889213 | CSAR_peak_ | 12.5        | - |
| chr3 | 6889247 | 6889349 | CSAR_peak_ | 16.34,14.76 | - |
| chr3 | 6917557 | 6917611 | CSAR_peak_ | 9.58        | - |
| chr3 | 6919516 | 6919576 | CSAR_peak_ | 13.48       | - |
| chr3 | 6920224 | 6920252 | CSAR_peak_ | 9.58        | - |
| chr3 | 6923455 | 6923512 | CSAR_peak_ | 6.03        | - |
| chr3 | 6923820 | 6923883 | CSAR_peak_ | 7.58,10.02  | - |
| chr3 | 6924282 | 6924328 | CSAR_peak_ | 7.92,17.82  | - |
| chr3 | 6987235 | 6987269 | CSAR_peak_ | 6.57        | - |
| chr3 | 6987441 | 6987494 | CSAR_peak_ | 7.27,6.21   | - |
| chr3 | 6998328 | 6998374 | CSAR_peak_ | 8.39        | - |
| chr3 | 6998753 | 6998832 | CSAR_peak_ | 9.58        | - |
| chr3 | 6999563 | 6999605 | CSAR_peak_ | 6.21        | - |
| chr3 | 6999848 | 6999863 | CSAR_peak_ | 7.34        | - |
| chr3 | 6999981 | 7000046 | CSAR_peak_ | 38.71,12.31 | - |
| chr3 | 7000072 | 7000087 | CSAR_peak_ | 6.03        | - |
| chr3 | 7000332 | 7000383 | CSAR_peak_ | 16.11,13.44 | - |
| chr3 | 7001146 | 7001197 | CSAR_peak_ | 6.21        | - |
| chr3 | 7001451 | 7001488 | CSAR_peak_ | 9.58        | - |
| chr3 | 7001653 | 7001696 | CSAR_peak_ | 6.95        | - |
| chr3 | 7003233 | 7003297 | CSAR_peak_ | 12.13,7.92  | - |
| chr3 | 7059219 | 7059284 | CSAR_peak_ | 6.21,7.27   | - |
| chr3 | 7059460 | 7059569 | CSAR_peak_ | 15.37,8.13  | - |
| chr3 | 7059748 | 7059806 | CSAR_peak_ | 6.21        | - |
| chr3 | 7059995 | 7060071 | CSAR_peak_ | 16.11,7.58  | - |
| chr3 | 7060105 | 7060154 | CSAR_peak_ | 9.58        | - |
| chr3 | 7060310 | 7060373 | CSAR_peak_ | 16.08,14.85 | - |
| chr3 | 7060441 | 7060481 | CSAR_peak_ | 14.88,10.83 | - |
| chr3 | 7060552 | 7060583 | CSAR_peak_ | 9.58        | - |
| chr3 | 7062350 | 7062395 | CSAR_peak_ | 7.27        | - |
| chr3 | 7062524 | 7062581 | CSAR_peak_ | 9.58        | - |
| chr3 | 7075349 | 7075395 | CSAR_peak_ | 8.28        | - |
| chr3 | 7078387 | 7078432 | CSAR_peak_ | 9.58        | - |
| chr3 | 7084533 | 7084622 | CSAR_peak_ | 6.21        | - |
| chr3 | 7085060 | 7085159 | CSAR_peak_ | 20.94,11.14 | - |
| chr3 | 7085219 | 7085253 | CSAR_peak_ | 7.26        | - |
| chr3 | 7085358 | 7085436 | CSAR_peak_ | 8.95,9.58   | - |
| chr3 | 7085741 | 7085790 | CSAR_peak_ | 7.27,7.58   | - |
| chr3 | 7086232 | 7086338 | CSAR_peak_ | 12.27,13.48 | - |
| chr3 | 7086453 | 7086515 | CSAR_peak_ | 6.21        | - |
| chr3 | 7087848 | 7087888 | CSAR_peak_ | 10.02,5.86  | - |

|      |         |         |            |               |   |
|------|---------|---------|------------|---------------|---|
| chr3 | 7088406 | 7088489 | CSAR_peak_ | 20.94,6.21    | - |
| chr3 | 7088782 | 7088890 | CSAR_peak_ | 12.31,7.73    | - |
| chr3 | 7088929 | 7089231 | CSAR_peak_ | 31.2,6.81,12. | - |
| chr3 | 7090123 | 7090196 | CSAR_peak_ | 10.83,9.58    | - |
| chr3 | 7090547 | 7090693 | CSAR_peak_ | 6.1,25.62     | - |
| chr3 | 7091402 | 7091465 | CSAR_peak_ | 6.95          | - |
| chr3 | 7091551 | 7091603 | CSAR_peak_ | 8.39,12.13    | - |
| chr3 | 7091642 | 7091695 | CSAR_peak_ | 6.44          | - |
| chr3 | 7093053 | 7093170 | CSAR_peak_ | 27.11,13.44   | - |
| chr3 | 7093203 | 7093261 | CSAR_peak_ | 14.88,7.27    | - |
| chr3 | 7093263 | 7093321 | CSAR_peak_ | 14.88         | - |
| chr3 | 7093353 | 7093430 | CSAR_peak_ | 35.7          | - |
| chr3 | 7110146 | 7110322 | CSAR_peak_ | 14.88,17.82,- | - |
| chr3 | 7110409 | 7110471 | CSAR_peak_ | 19.36         | - |
| chr3 | 7110560 | 7110598 | CSAR_peak_ | 6.21,7.27     | - |
| chr3 | 7110609 | 7110640 | CSAR_peak_ | 10.02         | - |
| chr3 | 7111016 | 7111069 | CSAR_peak_ | 7.53,8.09     | - |
| chr3 | 7111169 | 7111180 | CSAR_peak_ | 8.39          | - |
| chr3 | 7111565 | 7111620 | CSAR_peak_ | 6.21          | - |
| chr3 | 7175989 | 7176042 | CSAR_peak_ | 8.39,6.03     | - |
| chr3 | 7177308 | 7177360 | CSAR_peak_ | 7.92          | - |
| chr3 | 7199135 | 7199171 | CSAR_peak_ | 7.27          | - |
| chr3 | 7203891 | 7203905 | CSAR_peak_ | 7.27          | - |
| chr3 | 7204146 | 7204194 | CSAR_peak_ | 10.02         | - |
| chr3 | 7204621 | 7204633 | CSAR_peak_ | 6.1           | - |
| chr3 | 7204708 | 7204766 | CSAR_peak_ | 13.48         | - |
| chr3 | 7205556 | 7205612 | CSAR_peak_ | 9.58          | - |
| chr3 | 7206181 | 7206268 | CSAR_peak_ | 16.05         | - |
| chr3 | 7207038 | 7207088 | CSAR_peak_ | 6.21          | - |
| chr3 | 7207325 | 7207367 | CSAR_peak_ | 7.58          | - |
| chr3 | 7207583 | 7207662 | CSAR_peak_ | 8.39          | - |
| chr3 | 7221186 | 7221204 | CSAR_peak_ | 10.95         | - |
| chr3 | 7221219 | 7221260 | CSAR_peak_ | 5.86          | - |
| chr3 | 7221718 | 7221787 | CSAR_peak_ | 17.82         | - |
| chr3 | 7222120 | 7222201 | CSAR_peak_ | 21.35         | - |
| chr3 | 7222341 | 7222375 | CSAR_peak_ | 7.27          | - |
| chr3 | 7222411 | 7222470 | CSAR_peak_ | 6.95          | - |
| chr3 | 7223081 | 7223160 | CSAR_peak_ | 13.48         | - |
| chr3 | 7223452 | 7223501 | CSAR_peak_ | 7.58          | - |
| chr3 | 7223922 | 7223972 | CSAR_peak_ | 7.27          | - |
| chr3 | 7227435 | 7227481 | CSAR_peak_ | 7.27          | - |
| chr3 | 7249751 | 7249801 | CSAR_peak_ | 7.27          | - |

|      |         |         |             |                |   |
|------|---------|---------|-------------|----------------|---|
| chr3 | 7261322 | 7261380 | CSAR_peak_  | 9.58,8.39      | - |
| chr3 | 7261383 | 7261483 | CSAR_peak_  | 6.21,24.21     | - |
| chr3 | 7261824 | 7261868 | CSAR_peak_  | 9.58           | - |
| chr3 | 7262205 | 7262291 | CSAR_peak_  | 12.13          | - |
| chr3 | 7262464 | 7262509 | CSAR_peak_  | 6.21           | - |
| chr3 | 7267240 | 7267298 | CSAR_peak_  | 24.21          | - |
| chr3 | 7310624 | 7310643 | CSAR_peak_  | 7.27           | - |
| chr3 | 7312423 | 7312480 | CSAR_peak_  | 8.95           | - |
| chr3 | 7376806 | 7376873 | CSAR_peak_  | 7.58,20.94     | - |
| chr3 | 7376907 | 7377010 | CSAR_peak_  | 6.57,6.21      | - |
| chr3 | 7381084 | 7381178 | CSAR_peak_  | 8.28,12.31     | - |
| chr3 | 7381196 | 7381261 | CSAR_peak_  | 24.52,14.88    | - |
| chr3 | 7381527 | 7381608 | CSAR_peak_  | 9.58           | - |
| chr3 | 7381762 | 7381934 | CSAR_peak_  | 7.92,19.49,9.  | - |
| chr3 | 7381988 | 7382070 | CSAR_peak_  | 10.83          | - |
| chr3 | 7382112 | 7382159 | CSAR_peak_  | 6.57,10.83     | - |
| chr3 | 7382335 | 7382423 | CSAR_peak_! | 12.59          | - |
| chr3 | 7383125 | 7383167 | CSAR_peak_! | 7.92           | - |
| chr3 | 7383217 | 7383265 | CSAR_peak_  | 9.84,7.03      | - |
| chr3 | 7383332 | 7383376 | CSAR_peak_  | 13.76,12.35    | - |
| chr3 | 7383845 | 7383893 | CSAR_peak_  | 18.95,7.27     | - |
| chr3 | 7410660 | 7410683 | CSAR_peak_  | 7.27           | - |
| chr3 | 7414516 | 7414602 | CSAR_peak_  | 7.27,14.88     | - |
| chr3 | 7415246 | 7415314 | CSAR_peak_  | 10.83          | - |
| chr3 | 7417546 | 7417591 | CSAR_peak_  | 8.39           | - |
| chr3 | 7441259 | 7441317 | CSAR_peak_  | 14.76          | - |
| chr3 | 7442851 | 7442910 | CSAR_peak_  | 7.27           | - |
| chr3 | 7443073 | 7443122 | CSAR_peak_  | 6.21           | - |
| chr3 | 7443245 | 7443314 | CSAR_peak_  | 13.85,21.94    | - |
| chr3 | 7443416 | 7443463 | CSAR_peak_  | 6.52           | - |
| chr3 | 7456371 | 7456413 | CSAR_peak_  | 8.39           | - |
| chr3 | 7458242 | 7458267 | CSAR_peak_! | 6.81           | - |
| chr3 | 7458344 | 7458417 | CSAR_peak_  | 10.31,14.88,(  | - |
| chr3 | 7458435 | 7458529 | CSAR_peak_  | 19.36          | - |
| chr3 | 7459262 | 7459312 | CSAR_peak_  | 9.58           | - |
| chr3 | 7459723 | 7459754 | CSAR_peak_  | 8.65,7.27      | - |
| chr3 | 7460071 | 7460236 | CSAR_peak_  | 33.47,16.05    | - |
| chr3 | 7460732 | 7460782 | CSAR_peak_  | 12.13          | - |
| chr3 | 7461001 | 7461125 | CSAR_peak_  | 9.77,16.33,6.- | - |
| chr3 | 7461778 | 7461866 | CSAR_peak_  | 7.27           | - |
| chr3 | 7461909 | 7461963 | CSAR_peak_  | 14.88          | - |
| chr3 | 7462914 | 7462972 | CSAR_peak_  | 9.58           | - |

|      |         |         |            |              |   |
|------|---------|---------|------------|--------------|---|
| chr3 | 7464092 | 7464150 | CSAR_peak_ | 11.45,5.9    | - |
| chr3 | 7464324 | 7464382 | CSAR_peak_ | 16.08        | - |
| chr3 | 7464507 | 7464555 | CSAR_peak_ | 8.65         | - |
| chr3 | 7464569 | 7464637 | CSAR_peak_ | 22.69,6.32   | - |
| chr3 | 7464721 | 7464832 | CSAR_peak_ | 27.73,18.61, | - |
| chr3 | 7464860 | 7464900 | CSAR_peak_ | 16.11,10.83  | - |
| chr3 | 7545208 | 7545272 | CSAR_peak_ | 7.27         | - |
| chr3 | 7545433 | 7545472 | CSAR_peak_ | 15,9.58      | - |
| chr3 | 7545626 | 7545686 | CSAR_peak_ | 20.43,17.82  | - |
| chr3 | 7546007 | 7546069 | CSAR_peak_ | 6.44,7.27    | - |
| chr3 | 7547162 | 7547210 | CSAR_peak_ | 6.85         | - |
| chr3 | 7547606 | 7547684 | CSAR_peak_ | 12.94,12.13  | - |
| chr3 | 7547731 | 7547814 | CSAR_peak_ | 8.39,9.58    | - |
| chr3 | 7548322 | 7548376 | CSAR_peak_ | 9.58         | - |
| chr3 | 7548912 | 7549019 | CSAR_peak_ | 20.43,27.61  | - |
| chr3 | 7550162 | 7550212 | CSAR_peak_ | 6.21         | - |
| chr3 | 7550636 | 7550752 | CSAR_peak_ | 10.83,7.27   | - |
| chr3 | 7552028 | 7552075 | CSAR_peak_ | 14.88        | - |
| chr3 | 7552276 | 7552371 | CSAR_peak_ | 8.39,6.81    | - |
| chr3 | 7552737 | 7552774 | CSAR_peak_ | 7.27         | - |
| chr3 | 7578440 | 7578498 | CSAR_peak_ | 7.27         | - |
| chr3 | 7579218 | 7579276 | CSAR_peak_ | 17.37        | - |
| chr3 | 7579515 | 7579573 | CSAR_peak_ | 7.27         | - |
| chr3 | 7609410 | 7609460 | CSAR_peak_ | 7.27         | - |
| chr3 | 7609645 | 7609683 | CSAR_peak_ | 8.39         | - |
| chr3 | 7610220 | 7610289 | CSAR_peak_ | 9.55         | - |
| chr3 | 7615967 | 7616011 | CSAR_peak_ | 6.95         | - |
| chr3 | 7616678 | 7616717 | CSAR_peak_ | 9.27         | - |
| chr3 | 7616774 | 7616815 | CSAR_peak_ | 10.02        | - |
| chr3 | 7619243 | 7619334 | CSAR_peak_ | 7.92,6.21    | - |
| chr3 | 7620399 | 7620489 | CSAR_peak_ | 16.11,14.88  | - |
| chr3 | 7620670 | 7620706 | CSAR_peak_ | 9.58         | - |
| chr3 | 7621809 | 7621878 | CSAR_peak_ | 6.21,7.27    | - |
| chr3 | 7702105 | 7702182 | CSAR_peak_ | 11.14        | - |
| chr3 | 7702395 | 7702439 | CSAR_peak_ | 7.27         | - |
| chr3 | 7702774 | 7702841 | CSAR_peak_ | 10.02        | - |
| chr3 | 7703193 | 7703265 | CSAR_peak_ | 12.13        | - |
| chr3 | 7792989 | 7793054 | CSAR_peak_ | 12.13        | - |
| chr3 | 7794077 | 7794117 | CSAR_peak_ | 7.27         | - |
| chr3 | 7795262 | 7795298 | CSAR_peak_ | 8.39         | - |
| chr3 | 7795416 | 7795554 | CSAR_peak_ | 10.83,13.48, | - |
| chr3 | 7818501 | 7818587 | CSAR_peak_ | 6.21         | - |



|      |         |         |            |                   |   |
|------|---------|---------|------------|-------------------|---|
| chr3 | 7822226 | 7822305 | CSAR_peak_ | 9.58              | - |
| chr3 | 7822314 | 7822408 | CSAR_peak_ | 7.92              | - |
| chr3 | 7822680 | 7822739 | CSAR_peak_ | 12.13,14.88       | - |
| chr3 | 7822786 | 7822873 | CSAR_peak_ | 12.31,17.82       | - |
| chr3 | 7822947 | 7823085 | CSAR_peak_ | 15.2,22.56        | - |
| chr3 | 7823131 | 7823157 | CSAR_peak_ | 7.27              | - |
| chr3 | 7823261 | 7823287 | CSAR_peak_ | 7.27              | - |
| chr3 | 7823461 | 7823518 | CSAR_peak_ | 10.83             | - |
| chr3 | 7823766 | 7823827 | CSAR_peak_ | 7.58              | - |
| chr3 | 7824163 | 7824212 | CSAR_peak_ | 7.27              | - |
| chr3 | 7824918 | 7824987 | CSAR_peak_ | 8.65              | - |
| chr3 | 7825251 | 7825414 | CSAR_peak_ | 14.85,18.73       | - |
| chr3 | 7831356 | 7831420 | CSAR_peak_ | 10.83,7.27        | - |
| chr3 | 7832018 | 7832058 | CSAR_peak_ | 7.58              | - |
| chr3 | 7832779 | 7832849 | CSAR_peak_ | 10.95,7.27        | - |
| chr3 | 7833110 | 7833194 | CSAR_peak_ | 9.77,7            | - |
| chr3 | 7833530 | 7833573 | CSAR_peak_ | 7.27              | - |
| chr3 | 7833839 | 7833918 | CSAR_peak_ | 8.39              | - |
| chr3 | 7864646 | 7864695 | CSAR_peak_ | 13.48             | - |
| chr3 | 8006810 | 8006845 | CSAR_peak_ | 7.27              | - |
| chr3 | 8033676 | 8033760 | CSAR_peak_ | 9.77              | - |
| chr3 | 8034441 | 8034542 | CSAR_peak_ | 13.48             | - |
| chr3 | 8038479 | 8038516 | CSAR_peak_ | 7.27              | - |
| chr3 | 8180982 | 8181051 | CSAR_peak_ | 14.88             | - |
| chr3 | 8181087 | 8181130 | CSAR_peak_ | 10.83             | - |
| chr3 | 8181143 | 8181437 | CSAR_peak_ | 26.05,22.56,-     | - |
| chr3 | 8181480 | 8181795 | CSAR_peak_ | 7.27,24.21,10.83  | - |
| chr3 | 8207704 | 8207830 | CSAR_peak_ | 8.13,6.81         | - |
| chr3 | 8208225 | 8208303 | CSAR_peak_ | 14.88             | - |
| chr3 | 8268173 | 8268238 | CSAR_peak_ | 14.88             | - |
| chr3 | 8268446 | 8268491 | CSAR_peak_ | 6.21              | - |
| chr3 | 8376384 | 8376442 | CSAR_peak_ | 17.82,10.83       | - |
| chr3 | 8376641 | 8376743 | CSAR_peak_ | 16.19,10.31,10.83 | - |
| chr3 | 8376767 | 8376927 | CSAR_peak_ | 64.54,27.15,10.83 | - |
| chr3 | 8376929 | 8377087 | CSAR_peak_ | 48,62.03,10.83    | - |
| chr3 | 8377097 | 8377205 | CSAR_peak_ | 8.65,10.83,7.27   | - |
| chr3 | 8377292 | 8377339 | CSAR_peak_ | 10.83             | - |
| chr3 | 8377450 | 8377743 | CSAR_peak_ | 7.27,8.39,16.19   | - |
| chr3 | 8377765 | 8378123 | CSAR_peak_ | 8.81,12.13,10.83  | - |
| chr3 | 8387874 | 8387909 | CSAR_peak_ | 10.02,7.27        | - |
| chr3 | 8387992 | 8388049 | CSAR_peak_ | 25.07,19.36       | - |
| chr3 | 8388355 | 8388481 | CSAR_peak_ | 7.58,8.95         | - |

|      |         |         |            |                |   |
|------|---------|---------|------------|----------------|---|
| chr3 | 8389156 | 8389194 | CSAR_peak_ | 9.58,5.86      | - |
| chr3 | 8389239 | 8389361 | CSAR_peak_ | 17.82,19.36    | - |
| chr3 | 8389940 | 8389981 | CSAR_peak_ | 9.58,7.27      | - |
| chr3 | 8390246 | 8390338 | CSAR_peak_ | 11.66,13.48    | - |
| chr3 | 8390460 | 8390578 | CSAR_peak_ | 8.39           | - |
| chr3 | 8391404 | 8391445 | CSAR_peak_ | 9.58           | - |
| chr3 | 8391840 | 8391857 | CSAR_peak_ | 9.58           | - |
| chr3 | 8392821 | 8392872 | CSAR_peak_ | 9.58           | - |
| chr3 | 8423248 | 8423298 | CSAR_peak_ | 16.08          | - |
| chr3 | 8423365 | 8423383 | CSAR_peak_ | 13.51          | - |
| chr3 | 8423834 | 8423883 | CSAR_peak_ | 7.27           | - |
| chr3 | 8424037 | 8424091 | CSAR_peak_ | 7.92           | - |
| chr3 | 8449339 | 8449400 | CSAR_peak_ | 8.39           | - |
| chr3 | 8455075 | 8455124 | CSAR_peak_ | 7.27,5.86      | - |
| chr3 | 8458080 | 8458173 | CSAR_peak_ | 7.27           | - |
| chr3 | 8516737 | 8516812 | CSAR_peak_ | 12.13,8.39,9.- | - |
| chr3 | 8529937 | 8529995 | CSAR_peak_ | 8.39           | - |
| chr3 | 8532004 | 8532070 | CSAR_peak_ | 17.82          | - |
| chr3 | 8532712 | 8532799 | CSAR_peak_ | 11.35,7.34     | - |
| chr3 | 8532924 | 8532956 | CSAR_peak_ | 7.27           | - |
| chr3 | 8587880 | 8587951 | CSAR_peak_ | 6.95,7.92      | - |
| chr3 | 8589282 | 8589330 | CSAR_peak_ | 10.83          | - |
| chr3 | 8662986 | 8663026 | CSAR_peak_ | 7.27           | - |
| chr3 | 8663454 | 8663507 | CSAR_peak_ | 7.92           | - |
| chr3 | 8663978 | 8664024 | CSAR_peak_ | 14.88,6.21     | - |
| chr3 | 8664197 | 8664242 | CSAR_peak_ | 7.27           | - |
| chr3 | 8664404 | 8664467 | CSAR_peak_ | 11.38          | - |
| chr3 | 8667384 | 8667426 | CSAR_peak_ | 7.27,9.58      | - |
| chr3 | 8676589 | 8676669 | CSAR_peak_ | 8.2            | - |
| chr3 | 8677023 | 8677076 | CSAR_peak_ | 8.39           | - |
| chr3 | 8696563 | 8696617 | CSAR_peak_ | 8.39,6.21      | - |
| chr3 | 8706788 | 8706822 | CSAR_peak_ | 8.39           | - |
| chr3 | 8725343 | 8725384 | CSAR_peak_ | 7.27           | - |
| chr3 | 8731225 | 8731276 | CSAR_peak_ | 9.77           | - |
| chr3 | 8732370 | 8732432 | CSAR_peak_ | 6.21,7.27      | - |
| chr3 | 8732654 | 8732697 | CSAR_peak_ | 9.58,6.21      | - |
| chr3 | 8733798 | 8733863 | CSAR_peak_ | 9.72,14.85     | - |
| chr3 | 8733966 | 8734027 | CSAR_peak_ | 7.58           | - |
| chr3 | 8735216 | 8735264 | CSAR_peak_ | 8.39,22.56     | - |
| chr3 | 8735373 | 8735409 | CSAR_peak_ | 10.83          | - |
| chr3 | 8735500 | 8735559 | CSAR_peak_ | 14.88          | - |
| chr3 | 8735733 | 8735772 | CSAR_peak_ | 6.21           | - |

|      |         |         |            |                |
|------|---------|---------|------------|----------------|
| chr3 | 8736454 | 8736589 | CSAR_peak_ | 17.82,11.03,-  |
| chr3 | 8736727 | 8736776 | CSAR_peak_ | 10.02,19.36 -  |
| chr3 | 8737904 | 8737947 | CSAR_peak_ | 11.99 -        |
| chr3 | 8738124 | 8738210 | CSAR_peak_ | 17.51 -        |
| chr3 | 8738730 | 8738784 | CSAR_peak_ | 8.39,6.21 -    |
| chr3 | 8739754 | 8739803 | CSAR_peak_ | 9.58,9.58 -    |
| chr3 | 8741067 | 8741128 | CSAR_peak_ | 10.62,14.85 -  |
| chr3 | 8811404 | 8811481 | CSAR_peak_ | 8.39,19.36 -   |
| chr3 | 8811559 | 8811630 | CSAR_peak_ | 9.58 -         |
| chr3 | 8811715 | 8811884 | CSAR_peak_ | 27.64,6.03,3:- |
| chr3 | 8812152 | 8812213 | CSAR_peak_ | 7.92 -         |
| chr3 | 8869005 | 8869032 | CSAR_peak_ | 9.58 -         |
| chr3 | 8869134 | 8869148 | CSAR_peak_ | 6.21 -         |
| chr3 | 8869159 | 8869204 | CSAR_peak_ | 8.39 -         |
| chr3 | 8870438 | 8870465 | CSAR_peak_ | 6.21 -         |
| chr3 | 8870584 | 8870633 | CSAR_peak_ | 7.27,6.21 -    |
| chr3 | 8877106 | 8877163 | CSAR_peak_ | 9.58 -         |
| chr3 | 8889383 | 8889431 | CSAR_peak_ | 7.27 -         |
| chr3 | 8900470 | 8900508 | CSAR_peak_ | 6.21 -         |
| chr3 | 8900923 | 8900967 | CSAR_peak_ | 6.21 -         |
| chr3 | 8901003 | 8901109 | CSAR_peak_ | 9.58,7.27 -    |
| chr3 | 8901422 | 8901488 | CSAR_peak_ | 6.95 -         |
| chr3 | 8901525 | 8901582 | CSAR_peak_ | 10.83,7.27 -   |
| chr3 | 8901725 | 8901801 | CSAR_peak_ | 19.36,10.31 -  |
| chr3 | 8902403 | 8902440 | CSAR_peak_ | 9.58 -         |
| chr3 | 8916315 | 8916368 | CSAR_peak_ | 7.27 -         |
| chr3 | 8916794 | 8916842 | CSAR_peak_ | 7.27 -         |
| chr3 | 8916914 | 8916985 | CSAR_peak_ | 7.27 -         |
| chr3 | 8919895 | 8919978 | CSAR_peak_ | 19.36,8.65 -   |
| chr3 | 8920005 | 8920059 | CSAR_peak_ | 13.44,6.21,1:- |
| chr3 | 8920100 | 8920142 | CSAR_peak_ | 10.94 -        |
| chr3 | 8920413 | 8920461 | CSAR_peak_ | 14.76,9.58 -   |
| chr3 | 8920558 | 8920610 | CSAR_peak_ | 9.58,6.21 -    |
| chr3 | 8920900 | 8920959 | CSAR_peak_ | 8.39,9.97 -    |
| chr3 | 8921045 | 8921085 | CSAR_peak_ | 21.56 -        |
| chr3 | 8921102 | 8921122 | CSAR_peak_ | 6.21 -         |
| chr3 | 8921508 | 8921586 | CSAR_peak_ | 10.83,7.27 -   |
| chr3 | 8921632 | 8921752 | CSAR_peak_ | 8.39,7.92 -    |
| chr3 | 8922002 | 8922046 | CSAR_peak_ | 9.58 -         |
| chr3 | 8922346 | 8922491 | CSAR_peak_ | 10.53,9.58,5.- |
| chr3 | 8922979 | 8923044 | CSAR_peak_ | 17.4,6.44 -    |
| chr3 | 8946050 | 8946157 | CSAR_peak_ | 13.48,14.88 -  |

|      |         |         |             |                |   |
|------|---------|---------|-------------|----------------|---|
| chr3 | 8946294 | 8946320 | CSAR_peak_  | 9.58           | - |
| chr3 | 8946640 | 8946790 | CSAR_peak_  | 12.13,12.13    | - |
| chr3 | 8946922 | 8946982 | CSAR_peak_  | 6.21           | - |
| chr3 | 8947286 | 8947363 | CSAR_peak_  | 7.27,10.83     | - |
| chr3 | 8979065 | 8979156 | CSAR_peak_  | 38.85,32.36    | - |
| chr3 | 8979234 | 8979311 | CSAR_peak_  | 18.85,25.49,   | - |
| chr3 | 8979380 | 8979458 | CSAR_peak_  | 17.6,30.48,5!  | - |
| chr3 | 8979499 | 8979609 | CSAR_peak_! | 7.26,117.58,{  | - |
| chr3 | 9063981 | 9064040 | CSAR_peak_  | 6.21           | - |
| chr3 | 9077866 | 9077897 | CSAR_peak_  | 8.39,9.58      | - |
| chr3 | 9078471 | 9078497 | CSAR_peak_  | 7.27           | - |
| chr3 | 9079745 | 9079780 | CSAR_peak_  | 8.39           | - |
| chr3 | 9080104 | 9080158 | CSAR_peak_  | 7.27,6.21      | - |
| chr3 | 9081706 | 9081772 | CSAR_peak_! | 6.81,7.27,5.8- | - |
| chr3 | 9082352 | 9082401 | CSAR_peak_  | 6.03,6.02      | - |
| chr3 | 9082569 | 9082627 | CSAR_peak_  | 6.95,9.58      | - |
| chr3 | 9083993 | 9084031 | CSAR_peak_! | 5.86           | - |
| chr3 | 9084139 | 9084172 | CSAR_peak_  | 7.92           | - |
| chr3 | 9090968 | 9091003 | CSAR_peak_  | 7.27           | - |
| chr3 | 9091331 | 9091397 | CSAR_peak_  | 8.39,10.83     | - |
| chr3 | 9092965 | 9093031 | CSAR_peak_  | 7,6.44,8.14    | - |
| chr3 | 9093611 | 9093660 | CSAR_peak_  | 6.03,6.02      | - |
| chr3 | 9093828 | 9093886 | CSAR_peak_  | 6.95,9.58      | - |
| chr3 | 9095252 | 9095290 | CSAR_peak_! | 5.86           | - |
| chr3 | 9095398 | 9095431 | CSAR_peak_  | 7.92           | - |
| chr3 | 9157414 | 9157457 | CSAR_peak_  | 12.13          | - |
| chr3 | 9157541 | 9157576 | CSAR_peak_  | 7.27           | - |
| chr3 | 9158337 | 9158419 | CSAR_peak_  | 9.58,8.39      | - |
| chr3 | 9225851 | 9225983 | CSAR_peak_! | 29.84,61.26,;- | - |
| chr3 | 9235085 | 9235135 | CSAR_peak_  | 8.39           | - |
| chr3 | 9236062 | 9236128 | CSAR_peak_  | 7.27           | - |
| chr3 | 9252038 | 9252092 | CSAR_peak_  | 9.77           | - |
| chr3 | 9252341 | 9252430 | CSAR_peak_  | 10.83          | - |
| chr3 | 9252436 | 9252496 | CSAR_peak_  | 12.13          | - |
| chr3 | 9252983 | 9253033 | CSAR_peak_  | 8.39           | - |
| chr3 | 9269659 | 9269685 | CSAR_peak_  | 9.58           | - |
| chr3 | 9270194 | 9270238 | CSAR_peak_  | 10.83          | - |
| chr3 | 9270888 | 9270937 | CSAR_peak_  | 13.48          | - |
| chr3 | 9272551 | 9272600 | CSAR_peak_  | 7.92,8.65      | - |
| chr3 | 9272878 | 9272901 | CSAR_peak_  | 10.83          | - |
| chr3 | 9310444 | 9310494 | CSAR_peak_  | 6.03           | - |
| chr3 | 9311653 | 9311683 | CSAR_peak_  | 6.21           | - |

|      |         |         |            |               |   |
|------|---------|---------|------------|---------------|---|
| chr3 | 9312090 | 9312153 | CSAR_peak_ | 14.85         | - |
| chr3 | 9312754 | 9312808 | CSAR_peak_ | 7.27          | - |
| chr3 | 9312955 | 9313000 | CSAR_peak_ | 14.88         | - |
| chr3 | 9313317 | 9313369 | CSAR_peak_ | 9.58          | - |
| chr3 | 9423949 | 9423999 | CSAR_peak_ | 12.13,6.21    | - |
| chr3 | 9424794 | 9424881 | CSAR_peak_ | 20.43,8.39    | - |
| chr3 | 9425002 | 9425025 | CSAR_peak_ | 7.92          | - |
| chr3 | 9425050 | 9425067 | CSAR_peak_ | 10.02         | - |
| chr3 | 9425702 | 9425784 | CSAR_peak_ | 9.58          | - |
| chr3 | 9441982 | 9442039 | CSAR_peak_ | 14.88,7.27    | - |
| chr3 | 9442512 | 9442632 | CSAR_peak_ | 12.74,14.88   | - |
| chr3 | 9442981 | 9443024 | CSAR_peak_ | 7.27          | - |
| chr3 | 9450245 | 9450302 | CSAR_peak_ | 14.88,7.27    | - |
| chr3 | 9450775 | 9450895 | CSAR_peak_ | 12.74,14.88   | - |
| chr3 | 9451244 | 9451287 | CSAR_peak_ | 7.27          | - |
| chr3 | 9452135 | 9452147 | CSAR_peak_ | 7.58          | - |
| chr3 | 9452815 | 9452918 | CSAR_peak_ | 15,10.02      | - |
| chr3 | 9452993 | 9453051 | CSAR_peak_ | 5.86,8.39,9.5 | - |
| chr3 | 9453136 | 9453147 | CSAR_peak_ | 7.27          | - |
| chr3 | 9453161 | 9453182 | CSAR_peak_ | 11.98,7.94    | - |
| chr3 | 9453270 | 9453319 | CSAR_peak_ | 10.47,14.92   | - |
| chr3 | 9453606 | 9453640 | CSAR_peak_ | 6.21          | - |
| chr3 | 9453842 | 9453881 | CSAR_peak_ | 13.48         | - |
| chr3 | 9453956 | 9454035 | CSAR_peak_ | 17.37,40.66   | - |
| chr3 | 9454058 | 9454141 | CSAR_peak_ | 11.14,9.58    | - |
| chr3 | 9454178 | 9454248 | CSAR_peak_ | 12.13,6.03    | - |
| chr3 | 9454348 | 9454505 | CSAR_peak_ | 6.44,10.94,11 | - |
| chr3 | 9454605 | 9454668 | CSAR_peak_ | 8.14,7.34     | - |
| chr3 | 9454872 | 9454935 | CSAR_peak_ | 8.99,10.62    | - |
| chr3 | 9455063 | 9455151 | CSAR_peak_ | 16.33,31.2    | - |
| chr3 | 9455176 | 9455290 | CSAR_peak_ | 12.17,17.82   | - |
| chr3 | 9455550 | 9455746 | CSAR_peak_ | 16.55,29.14,1 | - |
| chr3 | 9455832 | 9455881 | CSAR_peak_ | 21.56,23      | - |
| chr3 | 9455886 | 9456010 | CSAR_peak_ | 44.01,20.76   | - |
| chr3 | 9456092 | 9456344 | CSAR_peak_ | 14.22,13.47   | - |
| chr3 | 9456355 | 9456586 | CSAR_peak_ | 19.21,26.8    | - |
| chr3 | 9456601 | 9456642 | CSAR_peak_ | 8.39          | - |
| chr3 | 9456682 | 9456752 | CSAR_peak_ | 10.95         | - |
| chr3 | 9456883 | 9456930 | CSAR_peak_ | 12.13         | - |
| chr3 | 9457090 | 9457141 | CSAR_peak_ | 14.88         | - |
| chr3 | 9457230 | 9457309 | CSAR_peak_ | 31.2,9.27     | - |
| chr3 | 9457389 | 9457491 | CSAR_peak_ | 9.58,8.39     | - |

|      |         |         |            |                |   |
|------|---------|---------|------------|----------------|---|
| chr3 | 9492074 | 9492144 | CSAR_peak_ | 6.57           | - |
| chr3 | 9505160 | 9505264 | CSAR_peak_ | 10.83,13.48    | - |
| chr3 | 9506517 | 9506586 | CSAR_peak_ | 8.39           | - |
| chr3 | 9507441 | 9507551 | CSAR_peak_ | 9.58,12.5      | - |
| chr3 | 9507661 | 9507765 | CSAR_peak_ | 11.35,41.63    | - |
| chr3 | 9507774 | 9507857 | CSAR_peak_ | 7.27,6.21      | - |
| chr3 | 9507941 | 9508018 | CSAR_peak_ | 10.83,6.81     | - |
| chr3 | 9508283 | 9508346 | CSAR_peak_ | 12.13          | - |
| chr3 | 9570583 | 9570630 | CSAR_peak_ | 14.88          | - |
| chr3 | 9570961 | 9571082 | CSAR_peak_ | 12.31,33.03    | - |
| chr3 | 9578463 | 9578520 | CSAR_peak_ | 14.88,7.27     | - |
| chr3 | 9578869 | 9579019 | CSAR_peak_ | 9.58,19.36     | - |
| chr3 | 9579159 | 9579219 | CSAR_peak_ | 6.21           | - |
| chr3 | 9579644 | 9579762 | CSAR_peak_ | 10.83,13.48    | - |
| chr3 | 9630422 | 9630465 | CSAR_peak_ | 6.21           | - |
| chr3 | 9632914 | 9632964 | CSAR_peak_ | 7.27           | - |
| chr3 | 9640037 | 9640106 | CSAR_peak_ | 17.82          | - |
| chr3 | 9641146 | 9641212 | CSAR_peak_ | 6.21           | - |
| chr3 | 9655486 | 9655533 | CSAR_peak_ | 6.21           | - |
| chr3 | 9683102 | 9683172 | CSAR_peak_ | 22.52,27.77    | - |
| chr3 | 9683216 | 9683292 | CSAR_peak_ | 6.21,9.61      | - |
| chr3 | 9683314 | 9683331 | CSAR_peak_ | 9.58           | - |
| chr3 | 9710878 | 9710938 | CSAR_peak_ | 13.48          | - |
| chr3 | 9710973 | 9711066 | CSAR_peak_ | 9.77           | - |
| chr3 | 9711330 | 9711359 | CSAR_peak_ | 6.1            | - |
| chr3 | 9711397 | 9711460 | CSAR_peak_ | 9.58           | - |
| chr3 | 9712503 | 9712595 | CSAR_peak_ | 14.88,8.39     | - |
| chr3 | 9722519 | 9722660 | CSAR_peak_ | 21.37,21.68,;- | - |
| chr3 | 9722680 | 9722764 | CSAR_peak_ | 16.25,6.44     | - |
| chr3 | 9722799 | 9723232 | CSAR_peak_ | 39.92,41.86,;- | - |
| chr3 | 9723307 | 9723401 | CSAR_peak_ | 27.64,7.06     | - |
| chr3 | 9723424 | 9723703 | CSAR_peak_ | 5.9,13.84,14.- | - |
| chr3 | 9752696 | 9752806 | CSAR_peak_ | 10.83          | - |
| chr3 | 9753266 | 9753322 | CSAR_peak_ | 8.65           | - |
| chr3 | 9763772 | 9763807 | CSAR_peak_ | 6.21           | - |
| chr3 | 9798541 | 9798614 | CSAR_peak_ | 10.83,7.92     | - |
| chr3 | 9799648 | 9799687 | CSAR_peak_ | 9.58           | - |
| chr3 | 9800827 | 9800869 | CSAR_peak_ | 7.27           | - |
| chr3 | 9804560 | 9804595 | CSAR_peak_ | 6.81,6.21      | - |
| chr3 | 9804687 | 9804754 | CSAR_peak_ | 16.05,10.82    | - |
| chr3 | 9805187 | 9805209 | CSAR_peak_ | 9.77           | - |
| chr3 | 9805328 | 9805404 | CSAR_peak_ | 8.39           | - |

|      |         |         |            |              |   |
|------|---------|---------|------------|--------------|---|
| chr3 | 9834051 | 9834082 | CSAR_peak_ | 7.27         | - |
| chr3 | 9834773 | 9834828 | CSAR_peak_ | 8.39         | - |
| chr3 | 9907816 | 9907871 | CSAR_peak_ | 16.11        | - |
| chr3 | 9907905 | 9908053 | CSAR_peak_ | 11.28,6.21   | - |
| chr3 | 9908348 | 9908388 | CSAR_peak_ | 12.13        | - |
| chr3 | 9908835 | 9908958 | CSAR_peak_ | 24.21,14.88, | - |
| chr3 | 9909318 | 9909431 | CSAR_peak_ | 12.13,19.36  | - |
| chr3 | 9909438 | 9909649 | CSAR_peak_ | 31.2,20.13   | - |
| chr3 | 9909887 | 9909942 | CSAR_peak_ | 7.27         | - |
| chr3 | 9910082 | 9910204 | CSAR_peak_ | 6.21,8.95    | - |
| chr3 | 9910245 | 9910312 | CSAR_peak_ | 12.13,6.21   | - |
| chr3 | 9910513 | 9910606 | CSAR_peak_ | 25.07,21.94  | - |
| chr3 | 9910635 | 9910810 | CSAR_peak_ | 19.36,24.21  | - |
| chr3 | 9910815 | 9910887 | CSAR_peak_ | 7.27         | - |
| chr3 | 9910943 | 9911025 | CSAR_peak_ | 9.58         | - |
| chr3 | 9911041 | 9911115 | CSAR_peak_ | 46.67,8.92   | - |
| chr3 | 9911407 | 9911482 | CSAR_peak_ | 7.58,17.82   | - |
| chr3 | 9912462 | 9912527 | CSAR_peak_ | 10.95,7.58   | - |
| chr3 | 9913212 | 9913296 | CSAR_peak_ | 14.76,5.86   | - |
| chr3 | 9914242 | 9914278 | CSAR_peak_ | 6.21         | - |
| chr3 | 9914649 | 9914700 | CSAR_peak_ | 14.88,9.58   | - |
| chr3 | 9914801 | 9914851 | CSAR_peak_ | 6.21         | - |
| chr3 | 9916791 | 9916851 | CSAR_peak_ | 12.13,6.57   | - |
| chr3 | 9916892 | 9916953 | CSAR_peak_ | 19.36        | - |
| chr3 | 9917250 | 9917306 | CSAR_peak_ | 8.14         | - |
| chr3 | 9917389 | 9917438 | CSAR_peak_ | 21.35,6.44   | - |
| chr3 | 9917677 | 9917726 | CSAR_peak_ | 7.34         | - |
| chr3 | 9917827 | 9917883 | CSAR_peak_ | 8.13         | - |
| chr3 | 9917988 | 9918039 | CSAR_peak_ | 6.03         | - |
| chr3 | 9918392 | 9918445 | CSAR_peak_ | 11.34,8.99   | - |
| chr3 | 9932943 | 9933004 | CSAR_peak_ | 7.27         | - |
| chr3 | 9933104 | 9933204 | CSAR_peak_ | 13.48        | - |
| chr3 | 9942185 | 9942267 | CSAR_peak_ | 8.65,14.88   | - |
| chr3 | 9942300 | 9942357 | CSAR_peak_ | 10.62        | - |
| chr3 | 9942518 | 9942588 | CSAR_peak_ | 7.27         | - |
| chr3 | 9945170 | 9945221 | CSAR_peak_ | 6.21         | - |
| chr3 | 9946432 | 9946484 | CSAR_peak_ | 14.88        | - |
| chr3 | 9946612 | 9946668 | CSAR_peak_ | 8.39,6.21    | - |
| chr3 | 9946687 | 9946733 | CSAR_peak_ | 9.58,6.21    | - |
| chr3 | 9946765 | 9946805 | CSAR_peak_ | 22.56,7.27   | - |
| chr3 | 9947303 | 9947373 | CSAR_peak_ | 33.03,20.43  | - |
| chr3 | 9947383 | 9947488 | CSAR_peak_ | 7.7          | - |

|      |          |          |            |               |   |
|------|----------|----------|------------|---------------|---|
| chr3 | 9947740  | 9947841  | CSAR_peak_ | 13.66         | - |
| chr3 | 9953010  | 9953050  | CSAR_peak_ | 7.58          | - |
| chr3 | 9953624  | 9953677  | CSAR_peak_ | 8.39          | - |
| chr3 | 9955743  | 9955801  | CSAR_peak_ | 7.27,8.65     | - |
| chr3 | 9986542  | 9986585  | CSAR_peak_ | 8.39          | - |
| chr3 | 10039752 | 10039808 | CSAR_peak_ | 6.21          | - |
| chr3 | 10039908 | 10039947 | CSAR_peak_ | 7.27          | - |
| chr3 | 10040052 | 10040082 | CSAR_peak_ | 7.27          | - |
| chr3 | 10040585 | 10040643 | CSAR_peak_ | 6.44          | - |
| chr3 | 10041376 | 10041445 | CSAR_peak_ | 5.62          | - |
| chr3 | 10041922 | 10041977 | CSAR_peak_ | 6.21          | - |
| chr3 | 10042031 | 10042081 | CSAR_peak_ | 6.21          | - |
| chr3 | 10042095 | 10042150 | CSAR_peak_ | 13.48         | - |
| chr3 | 10042228 | 10042289 | CSAR_peak_ | 16.11,10.7,5. | - |
| chr3 | 10044817 | 10044885 | CSAR_peak_ | 14.88,8.39    | - |
| chr3 | 10045228 | 10045336 | CSAR_peak_ | 22.69,26.05   | - |
| chr3 | 10045391 | 10045513 | CSAR_peak_ | 24.47,33.65   | - |
| chr3 | 10045540 | 10045739 | CSAR_peak_ | 27.11,15.43   | - |
| chr3 | 10045786 | 10045861 | CSAR_peak_ | 21.22,20.43   | - |
| chr3 | 10045866 | 10046104 | CSAR_peak_ | 6.95,48.39,7. | - |
| chr3 | 10046232 | 10046318 | CSAR_peak_ | 17.4,22.58    | - |
| chr3 | 10046372 | 10046510 | CSAR_peak_ | 9.58,17.82,1. | - |
| chr3 | 10046605 | 10046674 | CSAR_peak_ | 17.52,12.13   | - |
| chr3 | 10046823 | 10046958 | CSAR_peak_ | 9.58,24.21,2. | - |
| chr3 | 10047081 | 10047234 | CSAR_peak_ | 33.75,44.23   | - |
| chr3 | 10056561 | 10056606 | CSAR_peak_ | 8.39          | - |
| chr3 | 10057205 | 10057257 | CSAR_peak_ | 9.58          | - |
| chr3 | 10084990 | 10085047 | CSAR_peak_ | 8.39          | - |
| chr3 | 10085397 | 10085439 | CSAR_peak_ | 7.58          | - |
| chr3 | 10085616 | 10085716 | CSAR_peak_ | 7.68,12.13    | - |
| chr3 | 10085934 | 10085987 | CSAR_peak_ | 7.27          | - |
| chr3 | 10086248 | 10086318 | CSAR_peak_ | 7.7           | - |
| chr3 | 10088161 | 10088216 | CSAR_peak_ | 6.21          | - |
| chr3 | 10088303 | 10088348 | CSAR_peak_ | 7.27          | - |
| chr3 | 10131309 | 10131384 | CSAR_peak_ | 6.21          | - |
| chr3 | 10132010 | 10132070 | CSAR_peak_ | 8.39          | - |
| chr3 | 10132276 | 10132335 | CSAR_peak_ | 7.27          | - |
| chr3 | 10132513 | 10132575 | CSAR_peak_ | 9.58,7.27     | - |
| chr3 | 10133513 | 10133583 | CSAR_peak_ | 7.58,7.27     | - |
| chr3 | 10193832 | 10193918 | CSAR_peak_ | 18.73         | - |
| chr3 | 10194082 | 10194140 | CSAR_peak_ | 8.39          | - |
| chr3 | 10194147 | 10194268 | CSAR_peak_ | 13.48         | - |



|      |          |          |            |                |   |
|------|----------|----------|------------|----------------|---|
| chr3 | 10195003 | 10195066 | CSAR_peak_ | 10.83,7.27     | - |
| chr3 | 10195745 | 10195794 | CSAR_peak_ | 8.39           | - |
| chr3 | 10196282 | 10196344 | CSAR_peak_ | 12.17          | - |
| chr3 | 10196346 | 10196352 | CSAR_peak_ | 6.21           | - |
| chr3 | 10196685 | 10196746 | CSAR_peak_ | 8.52,12.17     | - |
| chr3 | 10196852 | 10196959 | CSAR_peak_ | 19.36,6.94     | - |
| chr3 | 10197056 | 10197064 | CSAR_peak_ | 7.27           | - |
| chr3 | 10197563 | 10197588 | CSAR_peak_ | 7.58           | - |
| chr3 | 10197677 | 10197705 | CSAR_peak_ | 6.21           | - |
| chr3 | 10197897 | 10197967 | CSAR_peak_ | 7.58           | - |
| chr3 | 10198273 | 10198390 | CSAR_peak_ | 9.58           | - |
| chr3 | 10199643 | 10199685 | CSAR_peak_ | 9.58           | - |
| chr3 | 10210856 | 10210924 | CSAR_peak_ | 9.58           | - |
| chr3 | 10211437 | 10211523 | CSAR_peak_ | 7.92,16.33     | - |
| chr3 | 10211972 | 10212045 | CSAR_peak_ | 6.21           | - |
| chr3 | 10214478 | 10214530 | CSAR_peak_ | 7.92           | - |
| chr3 | 10227231 | 10227261 | CSAR_peak_ | 7.58           | - |
| chr3 | 10227329 | 10227368 | CSAR_peak_ | 9.58           | - |
| chr3 | 10285087 | 10285138 | CSAR_peak_ | 7.92           | - |
| chr3 | 10285503 | 10285549 | CSAR_peak_ | 7.27           | - |
| chr3 | 10285851 | 10285916 | CSAR_peak_ | 6.21           | - |
| chr3 | 10286213 | 10286304 | CSAR_peak_ | 12.13,20.94    | - |
| chr3 | 10286325 | 10286400 | CSAR_peak_ | 16.54          | - |
| chr3 | 10286466 | 10286599 | CSAR_peak_ | 14.63,16.34    | - |
| chr3 | 10286820 | 10286969 | CSAR_peak_ | 14.91,12.12    | - |
| chr3 | 10287026 | 10287040 | CSAR_peak_ | 12.13          | - |
| chr3 | 10287063 | 10287123 | CSAR_peak_ | 9.55           | - |
| chr3 | 10287152 | 10287224 | CSAR_peak_ | 12.13          | - |
| chr3 | 10287261 | 10287313 | CSAR_peak_ | 7.92           | - |
| chr3 | 10287429 | 10287499 | CSAR_peak_ | 14.88          | - |
| chr3 | 10287668 | 10287722 | CSAR_peak_ | 19.36          | - |
| chr3 | 10355945 | 10356008 | CSAR_peak_ | 16.33          | - |
| chr3 | 10366807 | 10366858 | CSAR_peak_ | 6.03           | - |
| chr3 | 10366886 | 10366929 | CSAR_peak_ | 8.39           | - |
| chr3 | 10367901 | 10367963 | CSAR_peak_ | 7.27           | - |
| chr3 | 10380601 | 10380703 | CSAR_peak_ | 9.55,7.27      | - |
| chr3 | 10381719 | 10381799 | CSAR_peak_ | 12.31,14.88    | - |
| chr3 | 10381845 | 10381926 | CSAR_peak_ | 5.62,10.02,1(- | - |
| chr3 | 10382553 | 10382625 | CSAR_peak_ | 6.02,6.21      | - |
| chr3 | 10395481 | 10395549 | CSAR_peak_ | 9.58           | - |
| chr3 | 10396702 | 10396737 | CSAR_peak_ | 7.27           | - |
| chr3 | 10397174 | 10397256 | CSAR_peak_ | 19.36          | - |

|      |          |          |            |               |   |
|------|----------|----------|------------|---------------|---|
| chr3 | 10588502 | 10588571 | CSAR_peak_ | 7.27          | - |
| chr3 | 10589533 | 10589599 | CSAR_peak_ | 7.27,12.13    | - |
| chr3 | 10589704 | 10589765 | CSAR_peak_ | 8.65,8.39     | - |
| chr3 | 10589874 | 10589929 | CSAR_peak_ | 9.58          | - |
| chr3 | 10594660 | 10594714 | CSAR_peak_ | 7.27          | - |
| chr3 | 10595400 | 10595451 | CSAR_peak_ | 8.39          | - |
| chr3 | 10595723 | 10595767 | CSAR_peak_ | 7.27          | - |
| chr3 | 10596733 | 10596775 | CSAR_peak_ | 9.77          | - |
| chr3 | 10657830 | 10657873 | CSAR_peak_ | 14.88         | - |
| chr3 | 10657947 | 10657982 | CSAR_peak_ | 6.21          | - |
| chr3 | 10659329 | 10659376 | CSAR_peak_ | 7             | - |
| chr3 | 10661246 | 10661302 | CSAR_peak_ | 7.27          | - |
| chr3 | 10662451 | 10662538 | CSAR_peak_ | 7.27          | - |
| chr3 | 10676360 | 10676423 | CSAR_peak_ | 8.39          | - |
| chr3 | 10677198 | 10677244 | CSAR_peak_ | 6.21          | - |
| chr3 | 10773826 | 10773883 | CSAR_peak_ | 7.27,6.21     | - |
| chr3 | 10774225 | 10774265 | CSAR_peak_ | 14.88         | - |
| chr3 | 10774402 | 10774456 | CSAR_peak_ | 9.58          | - |
| chr3 | 10774585 | 10774681 | CSAR_peak_ | 9.41,8.39     | - |
| chr3 | 10788822 | 10788884 | CSAR_peak_ | 14.88         | - |
| chr3 | 10788969 | 10789064 | CSAR_peak_ | 7.27          | - |
| chr3 | 10789107 | 10789151 | CSAR_peak_ | 6.21          | - |
| chr3 | 10789179 | 10789217 | CSAR_peak_ | 6.21          | - |
| chr3 | 10789223 | 10789413 | CSAR_peak_ | 16.33,23.8,7. | - |
| chr3 | 10789468 | 10789522 | CSAR_peak_ | 24.21,19.36   | - |
| chr3 | 10789565 | 10789598 | CSAR_peak_ | 9.58          | - |
| chr3 | 10789615 | 10789661 | CSAR_peak_ | 7.73          | - |
| chr3 | 10789684 | 10789818 | CSAR_peak_ | 13.72,21.16   | - |
| chr3 | 10790104 | 10790214 | CSAR_peak_ | 14.76,20.13   | - |
| chr3 | 10790232 | 10790275 | CSAR_peak_ | 7.27          | - |
| chr3 | 10870145 | 10870203 | CSAR_peak_ | 9.58,9.77     | - |
| chr3 | 10870448 | 10870498 | CSAR_peak_ | 9.58          | - |
| chr3 | 10870560 | 10870599 | CSAR_peak_ | 12.13         | - |
| chr3 | 10870860 | 10870915 | CSAR_peak_ | 9.58          | - |
| chr3 | 10873222 | 10873282 | CSAR_peak_ | 14.88         | - |
| chr3 | 10873679 | 10873737 | CSAR_peak_ | 8.39,14.88    | - |
| chr3 | 10874000 | 10874036 | CSAR_peak_ | 9.58          | - |
| chr3 | 10874253 | 10874340 | CSAR_peak_ | 7.27,12.13    | - |
| chr3 | 10874542 | 10874572 | CSAR_peak_ | 7.27          | - |
| chr3 | 10875123 | 10875185 | CSAR_peak_ | 6.03          | - |
| chr3 | 10875960 | 10876021 | CSAR_peak_ | 8.65          | - |
| chr3 | 10877267 | 10877308 | CSAR_peak_ | 6.21          | - |

|      |          |          |            |                  |   |
|------|----------|----------|------------|------------------|---|
| chr3 | 10904157 | 10904208 | CSAR_peak_ | 8.39,7.27        | - |
| chr3 | 10960133 | 10960173 | CSAR_peak_ | 6.21             | - |
| chr3 | 10963758 | 10963799 | CSAR_peak_ | 7.27             | - |
| chr3 | 10964224 | 10964273 | CSAR_peak_ | 7.27             | - |
| chr3 | 10965256 | 10965295 | CSAR_peak_ | 6.21             | - |
| chr3 | 10968150 | 10968239 | CSAR_peak_ | 6.21,8.95        | - |
| chr3 | 10968395 | 10968442 | CSAR_peak_ | 12.93,13.29      | - |
| chr3 | 10968518 | 10968536 | CSAR_peak_ | 19.36            | - |
| chr3 | 10968547 | 10968622 | CSAR_peak_ | 8.34,6.74        | - |
| chr3 | 10968705 | 10968732 | CSAR_peak_ | 9.84,10.53       | - |
| chr3 | 10968781 | 10968890 | CSAR_peak_ | 22.56,7.27,19.36 | - |
| chr3 | 10968960 | 10969081 | CSAR_peak_ | 16.11,23.8       | - |
| chr3 | 10969187 | 10969263 | CSAR_peak_ | 31.2,14.88       | - |
| chr3 | 10970846 | 10970902 | CSAR_peak_ | 9.58             | - |
| chr3 | 10971126 | 10971161 | CSAR_peak_ | 6.21             | - |
| chr3 | 10971557 | 10971664 | CSAR_peak_ | 5.86,11.03       | - |
| chr3 | 10972134 | 10972182 | CSAR_peak_ | 7.27             | - |
| chr3 | 10972680 | 10972726 | CSAR_peak_ | 7.27             | - |
| chr3 | 10973359 | 10973436 | CSAR_peak_ | 20.94,10.83      | - |
| chr3 | 10973782 | 10973837 | CSAR_peak_ | 8.39             | - |
| chr3 | 10974229 | 10974309 | CSAR_peak_ | 8.14,37.04,22.56 | - |
| chr3 | 10974998 | 10975088 | CSAR_peak_ | 17.82,31.2       | - |
| chr3 | 10975139 | 10975196 | CSAR_peak_ | 10.83            | - |
| chr3 | 10975341 | 10975430 | CSAR_peak_ | 14.88            | - |
| chr3 | 10975564 | 10975604 | CSAR_peak_ | 9.58             | - |
| chr3 | 10975803 | 10975913 | CSAR_peak_ | 8.39,10.83       | - |
| chr3 | 10976135 | 10976212 | CSAR_peak_ | 8.39             | - |
| chr3 | 10976353 | 10976379 | CSAR_peak_ | 8.65             | - |
| chr3 | 10976755 | 10976815 | CSAR_peak_ | 8.65,6.22        | - |
| chr3 | 10976917 | 10976960 | CSAR_peak_ | 7.58             | - |
| chr3 | 10977103 | 10977169 | CSAR_peak_ | 19.36,8.39       | - |
| chr3 | 10977274 | 10977321 | CSAR_peak_ | 6.21             | - |
| chr3 | 10988334 | 10988371 | CSAR_peak_ | 6.21             | - |
| chr3 | 10988605 | 10988688 | CSAR_peak_ | 10.62            | - |
| chr3 | 11035492 | 11035513 | CSAR_peak_ | 8.94,6.68        | - |
| chr3 | 11035551 | 11035661 | CSAR_peak_ | 46.2,16.72,46.2  | - |
| chr3 | 11129666 | 11129722 | CSAR_peak_ | 7.27             | - |
| chr3 | 11129767 | 11129805 | CSAR_peak_ | 6.21             | - |
| chr3 | 11130074 | 11130136 | CSAR_peak_ | 7.27             | - |
| chr3 | 11130727 | 11130767 | CSAR_peak_ | 7.27             | - |
| chr3 | 11130850 | 11130902 | CSAR_peak_ | 9.58             | - |
| chr3 | 11131041 | 11131140 | CSAR_peak_ | 10.83,7.27       | - |

|      |          |          |            |                   |   |
|------|----------|----------|------------|-------------------|---|
| chr3 | 11131381 | 11131503 | CSAR_peak_ | 12.17,6.21        | - |
| chr3 | 11136595 | 11136655 | CSAR_peak_ | 6.95,7.27         | - |
| chr3 | 11136822 | 11136896 | CSAR_peak_ | 6.57,6.21         | - |
| chr3 | 11155323 | 11155383 | CSAR_peak_ | 10.02,9.58        | - |
| chr3 | 11155791 | 11155873 | CSAR_peak_ | 9.58              | - |
| chr3 | 11155958 | 11156073 | CSAR_peak_ | 5.86,11.38,10.86  | - |
| chr3 | 11156974 | 11157121 | CSAR_peak_ | 20.94,9.58        | - |
| chr3 | 11194088 | 11194135 | CSAR_peak_ | 14.88             | - |
| chr3 | 11194511 | 11194552 | CSAR_peak_ | 8.39,8.65         | - |
| chr3 | 11268459 | 11268506 | CSAR_peak_ | 7.27              | - |
| chr3 | 11268771 | 11268814 | CSAR_peak_ | 8.39              | - |
| chr3 | 11383620 | 11383670 | CSAR_peak_ | 6.21              | - |
| chr3 | 11591196 | 11591284 | CSAR_peak_ | 8.39,8.65         | - |
| chr3 | 11591406 | 11591492 | CSAR_peak_ | 8.39,8.65         | - |
| chr3 | 11591495 | 11591644 | CSAR_peak_ | 12.13,12.13       | - |
| chr3 | 11664387 | 11664485 | CSAR_peak_ | 8.65,9.58         | - |
| chr3 | 11922348 | 11922390 | CSAR_peak_ | 7.27              | - |
| chr3 | 11922593 | 11922665 | CSAR_peak_ | 12.13             | - |
| chr3 | 11922840 | 11922879 | CSAR_peak_ | 10.83             | - |
| chr3 | 11923829 | 11923897 | CSAR_peak_ | 14.88             | - |
| chr3 | 11976962 | 11977017 | CSAR_peak_ | 14.76,14.88       | - |
| chr3 | 11977081 | 11977134 | CSAR_peak_ | 9.58              | - |
| chr3 | 11977210 | 11977329 | CSAR_peak_ | 16.11,6.21,7.27   | - |
| chr3 | 11977330 | 11977340 | CSAR_peak_ | 8.39              | - |
| chr3 | 11977620 | 11977706 | CSAR_peak_ | 13.44,12.13       | - |
| chr3 | 11977790 | 11977796 | CSAR_peak_ | 6.21              | - |
| chr3 | 11977887 | 11977936 | CSAR_peak_ | 14.88             | - |
| chr3 | 11978035 | 11978209 | CSAR_peak_ | 19.36,15.9,8.39   | - |
| chr3 | 11978273 | 11978340 | CSAR_peak_ | 11.61             | - |
| chr3 | 11978404 | 11978449 | CSAR_peak_ | 21.74,12.22       | - |
| chr3 | 11978467 | 11978517 | CSAR_peak_ | 10.31             | - |
| chr3 | 11978525 | 11978668 | CSAR_peak_ | 24.97,17.4        | - |
| chr3 | 11978813 | 11978861 | CSAR_peak_ | 6.21              | - |
| chr3 | 11979358 | 11979402 | CSAR_peak_ | 6.21              | - |
| chr3 | 12448827 | 12448862 | CSAR_peak_ | 8.13,6.78         | - |
| chr3 | 12448903 | 12449073 | CSAR_peak_ | 17.65,14.88,10.31 | - |
| chr3 | 12449081 | 12449442 | CSAR_peak_ | 16.77,42.64,10.31 | - |
| chr3 | 12449448 | 12449843 | CSAR_peak_ | 9.58,18.35,10.31  | - |
| chr3 | 12449886 | 12449996 | CSAR_peak_ | 21.35,21.56       | - |
| chr3 | 12450033 | 12450072 | CSAR_peak_ | 14.88             | - |
| chr3 | 12450093 | 12450195 | CSAR_peak_ | 16.16,40.66       | - |
| chr3 | 12450544 | 12450809 | CSAR_peak_ | 6.81,27.64,10.31  | - |

|      |          |          |            |                |   |
|------|----------|----------|------------|----------------|---|
| chr3 | 12451099 | 12451138 | CSAR_peak_ | 7.27           | - |
| chr3 | 12650333 | 12650400 | CSAR_peak_ | 9.58,9.48      | - |
| chr3 | 12651889 | 12652011 | CSAR_peak_ | 7.27,6.21      | - |
| chr3 | 12652506 | 12652562 | CSAR_peak_ | 8.39,6.21      | - |
| chr3 | 12652826 | 12652955 | CSAR_peak_ | 9.58,17.82     | - |
| chr3 | 13493129 | 13493157 | CSAR_peak_ | 7.27           | - |
| chr3 | 13493248 | 13493296 | CSAR_peak_ | 7.27           | - |
| chr3 | 13526412 | 13526548 | CSAR_peak_ | 11.28,29.4     | - |
| chr3 | 13526593 | 13526734 | CSAR_peak_ | 27.77,6.85     | - |
| chr3 | 13526856 | 13526874 | CSAR_peak_ | 6.21           | - |
| chr3 | 13526947 | 13527012 | CSAR_peak_ | 9.77           | - |
| chr3 | 13527616 | 13527808 | CSAR_peak_ | 15.47,12.13    | - |
| chr3 | 13529722 | 13529822 | CSAR_peak_ | 9.77,6.44      | - |
| chr3 | 13690339 | 13690389 | CSAR_peak_ | 6.21           | - |
| chr3 | 13704705 | 13704746 | CSAR_peak_ | 6.21           | - |
| chr3 | 13733849 | 13733856 | CSAR_peak_ | 9.58           | - |
| chr3 | 13747691 | 13747725 | CSAR_peak_ | 8.65           | - |
| chr3 | 13755971 | 13756020 | CSAR_peak_ | 6.21           | - |
| chr3 | 13760418 | 13760471 | CSAR_peak_ | 14.24,27.61    | - |
| chr3 | 13763875 | 13763928 | CSAR_peak_ | 16.21,21.2     | - |
| chr3 | 13767742 | 13767783 | CSAR_peak_ | 6.21           | - |
| chr3 | 13772284 | 13772325 | CSAR_peak_ | 6.21           | - |
| chr3 | 13778795 | 13778838 | CSAR_peak_ | 6.81,10.82     | - |
| chr3 | 13790664 | 13790698 | CSAR_peak_ | 8.65           | - |
| chr3 | 14210118 | 14210169 | CSAR_peak_ | 7.92           | - |
| chr3 | 14211643 | 14211694 | CSAR_peak_ | 6.71           | - |
| chr3 | 14213169 | 14213236 | CSAR_peak_ | 6.74           | - |
| chr3 | 14216205 | 14216252 | CSAR_peak_ | 26.08          | - |
| chr3 | 14219198 | 14219249 | CSAR_peak_ | 9.77           | - |
| chr3 | 14221214 | 14221266 | CSAR_peak_ | 9.77           | - |
| chr3 | 14223239 | 14223290 | CSAR_peak_ | 7.92,6.03      | - |
| chr3 | 14228907 | 14229029 | CSAR_peak_ | 9.79           | - |
| chr3 | 14229370 | 14229410 | CSAR_peak_ | 14.63          | - |
| chr3 | 14229502 | 14229628 | CSAR_peak_ | 18.73,8.13     | - |
| chr3 | 14229876 | 14230002 | CSAR_peak_ | 8.65,14.59,7.- | - |
| chr3 | 14230385 | 14230460 | CSAR_peak_ | 12.17          | - |
| chr3 | 14230940 | 14230984 | CSAR_peak_ | 13.51          | - |
| chr3 | 14231074 | 14231140 | CSAR_peak_ | 17.82,6.21,1(- | - |
| chr3 | 14231433 | 14231473 | CSAR_peak_ | 7.27,6.21      | - |
| chr3 | 14231563 | 14231633 | CSAR_peak_ | 24.21,7.92     | - |
| chr3 | 14231853 | 14231907 | CSAR_peak_ | 9.58,6.44      | - |
| chr3 | 14231937 | 14231959 | CSAR_peak_ | 7.58           | - |

|      |          |          |            |                 |   |
|------|----------|----------|------------|-----------------|---|
| chr3 | 14232213 | 14232277 | CSAR_peak_ | 10.83           | - |
| chr3 | 14559459 | 14559499 | CSAR_peak_ | 6.21            | - |
| chr3 | 15197060 | 15197110 | CSAR_peak_ | 8.39            | - |
| chr3 | 15197364 | 15197434 | CSAR_peak_ | 12.59,8.39      | - |
| chr3 | 15197439 | 15197479 | CSAR_peak_ | 8.28,7.7        | - |
| chr3 | 15197792 | 15197829 | CSAR_peak_ | 8.65,9.27       | - |
| chr3 | 15198909 | 15198952 | CSAR_peak_ | 9.77,8.14       | - |
| chr3 | 15198996 | 15199046 | CSAR_peak_ | 6.21            | - |
| chr3 | 15199104 | 15199144 | CSAR_peak_ | 8.39            | - |
| chr3 | 15199224 | 15199274 | CSAR_peak_ | 5.86            | - |
| chr3 | 15199495 | 15199557 | CSAR_peak_ | 12.13           | - |
| chr3 | 15199733 | 15199796 | CSAR_peak_ | 7.27            | - |
| chr3 | 15200343 | 15200408 | CSAR_peak_ | 8.39            | - |
| chr3 | 15200550 | 15200606 | CSAR_peak_ | 7.27            | - |
| chr3 | 15200830 | 15200896 | CSAR_peak_ | 10.7            | - |
| chr3 | 15201722 | 15201771 | CSAR_peak_ | 6.21            | - |
| chr3 | 15202282 | 15202348 | CSAR_peak_ | 9.58,12.17      | - |
| chr3 | 15210221 | 15210235 | CSAR_peak_ | 7.27            | - |
| chr3 | 15212126 | 15212208 | CSAR_peak_ | 9.58,7.27       | - |
| chr3 | 15234436 | 15234487 | CSAR_peak_ | 10.31           | - |
| chr3 | 15234622 | 15234812 | CSAR_peak_ | 6.57,14.88,11.1 | - |
| chr3 | 15234913 | 15234991 | CSAR_peak_ | 7.27,9.77       | - |
| chr3 | 15235834 | 15235900 | CSAR_peak_ | 7.27,10.31      | - |
| chr3 | 15235984 | 15236061 | CSAR_peak_ | 9.58            | - |
| chr3 | 15236144 | 15236187 | CSAR_peak_ | 6.21,7.27       | - |
| chr3 | 15237169 | 15237200 | CSAR_peak_ | 7.27            | - |
| chr3 | 15237305 | 15237381 | CSAR_peak_ | 12.13,10.31     | - |
| chr3 | 15237387 | 15237429 | CSAR_peak_ | 7.27            | - |
| chr3 | 15237539 | 15237601 | CSAR_peak_ | 15.2,13.85      | - |
| chr3 | 15238486 | 15238536 | CSAR_peak_ | 13.29           | - |
| chr3 | 15238960 | 15239041 | CSAR_peak_ | 14.88,12.17     | - |
| chr3 | 15239070 | 15239145 | CSAR_peak_ | 9.58,6.21       | - |
| chr3 | 15239151 | 15239218 | CSAR_peak_ | 6.21,9.58       | - |
| chr3 | 15239499 | 15239545 | CSAR_peak_ | 8.39            | - |
| chr3 | 15239657 | 15239707 | CSAR_peak_ | 13.66,9.58      | - |
| chr3 | 15239764 | 15239854 | CSAR_peak_ | 9.41,9.58,9.5   | - |
| chr3 | 15240023 | 15240098 | CSAR_peak_ | 8.65            | - |
| chr3 | 15240288 | 15240343 | CSAR_peak_ | 9.58            | - |
| chr3 | 15240476 | 15240568 | CSAR_peak_ | 25.91,15.2      | - |
| chr3 | 15241008 | 15241044 | CSAR_peak_ | 5.86            | - |
| chr3 | 15241669 | 15241738 | CSAR_peak_ | 8.34            | - |
| chr3 | 15241992 | 15242036 | CSAR_peak_ | 13.48           | - |

|      |          |          |            |               |   |
|------|----------|----------|------------|---------------|---|
| chr3 | 15242481 | 15242532 | CSAR_peak_ | 7.58          | - |
| chr3 | 15242556 | 15242617 | CSAR_peak_ | 21.56,5.95    | - |
| chr3 | 15243253 | 15243314 | CSAR_peak_ | 9.58          | - |
| chr3 | 15243569 | 15243611 | CSAR_peak_ | 9.58          | - |
| chr3 | 15243691 | 15243745 | CSAR_peak_ | 16.33         | - |
| chr3 | 15354955 | 15355006 | CSAR_peak_ | 8.39          | - |
| chr3 | 15512411 | 15512485 | CSAR_peak_ | 14.88         | - |
| chr3 | 15513142 | 15513202 | CSAR_peak_ | 17.82         | - |
| chr3 | 15513888 | 15514015 | CSAR_peak_ | 8.39,9.58,6.8 | - |
| chr3 | 15515182 | 15515253 | CSAR_peak_ | 8.39,7.58     | - |
| chr3 | 15516689 | 15516724 | CSAR_peak_ | 6.21          | - |
| chr3 | 15519033 | 15519113 | CSAR_peak_ | 9.58          | - |
| chr3 | 15614029 | 15614088 | CSAR_peak_ | 9.58          | - |
| chr3 | 15615646 | 15615686 | CSAR_peak_ | 7.27          | - |
| chr3 | 15616789 | 15616824 | CSAR_peak_ | 6.21          | - |
| chr3 | 15616868 | 15616933 | CSAR_peak_ | 10.83,5.86    | - |
| chr3 | 15664734 | 15664781 | CSAR_peak_ | 7.27          | - |
| chr3 | 15664801 | 15664888 | CSAR_peak_ | 25.21,21.35   | - |
| chr3 | 15664909 | 15665010 | CSAR_peak_ | 23.49,7.27    | - |
| chr3 | 15702210 | 15702270 | CSAR_peak_ | 8.65          | - |
| chr3 | 15702397 | 15702476 | CSAR_peak_ | 7.27,9.77,10. | - |
| chr3 | 15703551 | 15703626 | CSAR_peak_ | 10.02,14.88   | - |
| chr3 | 15703695 | 15703745 | CSAR_peak_ | 13.44         | - |
| chr3 | 15703959 | 15704012 | CSAR_peak_ | 26.05         | - |
| chr3 | 15704095 | 15704144 | CSAR_peak_ | 10.83         | - |
| chr3 | 15779174 | 15779239 | CSAR_peak_ | 6.21          | - |
| chr3 | 15798423 | 15798519 | CSAR_peak_ | 8.2,7.27      | - |
| chr3 | 15799564 | 15799666 | CSAR_peak_ | 14.88,10.83   | - |
| chr3 | 15799686 | 15799749 | CSAR_peak_ | 10.83         | - |
| chr3 | 15800264 | 15800309 | CSAR_peak_ | 6.21          | - |
| chr3 | 15800649 | 15800692 | CSAR_peak_ | 6.21          | - |
| chr3 | 15801078 | 15801123 | CSAR_peak_ | 7.92          | - |
| chr3 | 15869845 | 15869881 | CSAR_peak_ | 7.58          | - |
| chr3 | 15869944 | 15870007 | CSAR_peak_ | 9.58          | - |
| chr3 | 15870087 | 15870111 | CSAR_peak_ | 9.58          | - |
| chr3 | 15870261 | 15870284 | CSAR_peak_ | 7.58          | - |
| chr3 | 15902365 | 15902458 | CSAR_peak_ | 10.95,14.88   | - |
| chr3 | 15902514 | 15902731 | CSAR_peak_ | 17.68,72.9    | - |
| chr3 | 15902764 | 15902830 | CSAR_peak_ | 16.11,8.28    | - |
| chr3 | 15903083 | 15903143 | CSAR_peak_ | 7.58          | - |
| chr3 | 15903352 | 15903417 | CSAR_peak_ | 8.39          | - |
| chr3 | 15952200 | 15952367 | CSAR_peak_ | 27.83,5.97,6. | - |

|      |          |          |             |               |   |
|------|----------|----------|-------------|---------------|---|
| chr3 | 15952420 | 15952478 | CSAR_peak_! | 12.59         | - |
| chr3 | 15952497 | 15952726 | CSAR_peak_! | 23.03         | - |
| chr3 | 15952865 | 15952998 | CSAR_peak_! | 25.91,13.44,  | - |
| chr3 | 16013540 | 16013592 | CSAR_peak_! | 6.21,6.57     | - |
| chr3 | 16013612 | 16013665 | CSAR_peak_! | 7.27          | - |
| chr3 | 16014084 | 16014126 | CSAR_peak_! | 7.58          | - |
| chr3 | 16014381 | 16014444 | CSAR_peak_! | 10.83         | - |
| chr3 | 16014564 | 16014615 | CSAR_peak_! | 14.88         | - |
| chr3 | 16014999 | 16015057 | CSAR_peak_! | 14.88         | - |
| chr3 | 16015218 | 16015277 | CSAR_peak_! | 7.27,8.28,7.2 | - |
| chr3 | 16016060 | 16016096 | CSAR_peak_! | 6.21          | - |
| chr3 | 16016272 | 16016329 | CSAR_peak_! | 7.58          | - |
| chr3 | 16017361 | 16017404 | CSAR_peak_! | 6.21,6.44     | - |
| chr3 | 16017418 | 16017459 | CSAR_peak_! | 9.58          | - |
| chr3 | 16017765 | 16017805 | CSAR_peak_! | 9.58          | - |
| chr3 | 16018307 | 16018366 | CSAR_peak_! | 7.27,10.83    | - |
| chr3 | 16018493 | 16018537 | CSAR_peak_! | 7.27          | - |
| chr3 | 16074426 | 16074484 | CSAR_peak_! | 7.27,10.83    | - |
| chr3 | 16092101 | 16092152 | CSAR_peak_! | 7.27          | - |
| chr3 | 16093695 | 16093741 | CSAR_peak_! | 6.21          | - |
| chr3 | 16093836 | 16093910 | CSAR_peak_! | 7.27,12.13    | - |
| chr3 | 16093996 | 16094038 | CSAR_peak_! | 16.33         | - |
| chr3 | 16094606 | 16094678 | CSAR_peak_! | 7.58          | - |
| chr3 | 16094930 | 16095037 | CSAR_peak_! | 9.58,7.58     | - |
| chr3 | 16095331 | 16095371 | CSAR_peak_! | 7.27          | - |
| chr3 | 16165787 | 16165831 | CSAR_peak_! | 8.39,6.21     | - |
| chr3 | 16188887 | 16188934 | CSAR_peak_! | 6.21          | - |
| chr3 | 16472947 | 16473053 | CSAR_peak_! | 16.11         | - |
| chr3 | 16473122 | 16473153 | CSAR_peak_! | 15            | - |
| chr3 | 16473233 | 16473257 | CSAR_peak_! | 12.13         | - |
| chr3 | 16473455 | 16473578 | CSAR_peak_! | 9.58          | - |
| chr3 | 16473629 | 16473693 | CSAR_peak_! | 16.19,20.43   | - |
| chr3 | 16473887 | 16473914 | CSAR_peak_! | 10.83         | - |
| chr3 | 16474305 | 16474321 | CSAR_peak_! | 6.21          | - |
| chr3 | 16474365 | 16474509 | CSAR_peak_! | 7.27,10.83,2! | - |
| chr3 | 16474841 | 16474927 | CSAR_peak_! | 7.27,9.27     | - |
| chr3 | 16475069 | 16475134 | CSAR_peak_! | 14.76         | - |
| chr3 | 16541918 | 16542001 | CSAR_peak_! | 13.48         | - |
| chr3 | 16542048 | 16542088 | CSAR_peak_! | 7.27          | - |
| chr3 | 16542090 | 16542101 | CSAR_peak_! | 7.27          | - |
| chr3 | 16542465 | 16542624 | CSAR_peak_! | 16.11,6.81,1! | - |
| chr3 | 16543107 | 16543138 | CSAR_peak_! | 9.58,7.34     | - |



|      |          |          |            |               |   |
|------|----------|----------|------------|---------------|---|
| chr3 | 16543345 | 16543397 | CSAR_peak_ | 15.68         | - |
| chr3 | 16544702 | 16544771 | CSAR_peak_ | 29.2          | - |
| chr3 | 16545218 | 16545264 | CSAR_peak_ | 7.27          | - |
| chr3 | 16545999 | 16546052 | CSAR_peak_ | 6.21          | - |
| chr3 | 16546190 | 16546208 | CSAR_peak_ | 6.21          | - |
| chr3 | 16546592 | 16546646 | CSAR_peak_ | 8.39          | - |
| chr3 | 16547150 | 16547232 | CSAR_peak_ | 12.13         | - |
| chr3 | 16547528 | 16547600 | CSAR_peak_ | 6.03          | - |
| chr3 | 16548124 | 16548157 | CSAR_peak_ | 6.21          | - |
| chr3 | 16570994 | 16571028 | CSAR_peak_ | 8.39          | - |
| chr3 | 16571323 | 16571367 | CSAR_peak_ | 6.21          | - |
| chr3 | 16571646 | 16571706 | CSAR_peak_ | 6.21          | - |
| chr3 | 16572456 | 16572514 | CSAR_peak_ | 10.83,7.27    | - |
| chr3 | 16572515 | 16572530 | CSAR_peak_ | 6.78          | - |
| chr3 | 16572612 | 16572688 | CSAR_peak_ | 17.37,10.83   | - |
| chr3 | 16591213 | 16591311 | CSAR_peak_ | 10.83,7.27    | - |
| chr3 | 16592225 | 16592293 | CSAR_peak_ | 10.83         | - |
| chr3 | 16592568 | 16592626 | CSAR_peak_ | 9.58          | - |
| chr3 | 16592811 | 16592867 | CSAR_peak_ | 6.57          | - |
| chr3 | 16593181 | 16593267 | CSAR_peak_ | 9.48,8.39     | - |
| chr3 | 16593283 | 16593333 | CSAR_peak_ | 6.21          | - |
| chr3 | 16593618 | 16593673 | CSAR_peak_ | 7.58          | - |
| chr3 | 16596694 | 16596733 | CSAR_peak_ | 7             | - |
| chr3 | 16597444 | 16597490 | CSAR_peak_ | 7.27          | - |
| chr3 | 16597501 | 16597559 | CSAR_peak_ | 9.58          | - |
| chr3 | 16597843 | 16597913 | CSAR_peak_ | 8.39          | - |
| chr3 | 16598021 | 16598087 | CSAR_peak_ | 9.58          | - |
| chr3 | 16598107 | 16598182 | CSAR_peak_ | 25.91         | - |
| chr3 | 16598397 | 16598442 | CSAR_peak_ | 6.21          | - |
| chr3 | 16617618 | 16617748 | CSAR_peak_ | 10.95,7.34,6. | - |
| chr3 | 16618289 | 16618328 | CSAR_peak_ | 7.27          | - |
| chr3 | 16619564 | 16619656 | CSAR_peak_ | 9.58,6.21     | - |
| chr3 | 16619886 | 16619943 | CSAR_peak_ | 13.48         | - |
| chr3 | 16620033 | 16620134 | CSAR_peak_ | 25.91,72.9    | - |
| chr3 | 16620419 | 16620572 | CSAR_peak_ | 30.8,85.68    | - |
| chr3 | 16620754 | 16620852 | CSAR_peak_ | 22.56,13.48   | - |
| chr3 | 16620889 | 16621025 | CSAR_peak_ | 42.57,24.52   | - |
| chr3 | 16621031 | 16621073 | CSAR_peak_ | 6.21          | - |
| chr3 | 16621249 | 16621331 | CSAR_peak_ | 19.36,8.39    | - |
| chr3 | 16621385 | 16621451 | CSAR_peak_ | 8.39          | - |
| chr3 | 16621641 | 16621690 | CSAR_peak_ | 9.48,12.74    | - |
| chr3 | 16621724 | 16621817 | CSAR_peak_ | 27.77,8.07,6. | - |

|      |          |          |             |                |
|------|----------|----------|-------------|----------------|
| chr3 | 16622013 | 16622102 | CSAR_peak_  | 15.58,6.81,34- |
| chr3 | 16622176 | 16622294 | CSAR_peak_  | 41.66,11.03 -  |
| chr3 | 16622314 | 16622382 | CSAR_peak_  | 30.81,19.09 -  |
| chr3 | 16622436 | 16622512 | CSAR_peak_  | 34.26,46.7 -   |
| chr3 | 16622580 | 16622674 | CSAR_peak_  | 18.73,10.83 -  |
| chr3 | 16622682 | 16622774 | CSAR_peak_  | 7.27,10.83 -   |
| chr3 | 16622809 | 16622855 | CSAR_peak_! | 10.18 -        |
| chr3 | 16623019 | 16623041 | CSAR_peak_  | 6.21 -         |
| chr3 | 16623105 | 16623239 | CSAR_peak_! | 6.21,7.58,28.- |
| chr3 | 16623260 | 16623354 | CSAR_peak_! | 9.77,64.3,25.- |
| chr3 | 16623406 | 16623433 | CSAR_peak_  | 12.17,9.58 -   |
| chr3 | 16623536 | 16623599 | CSAR_peak_  | 11.38,12.17 -  |
| chr3 | 16623785 | 16624067 | CSAR_peak_  | 28.93,10.95,-  |
| chr3 | 16624081 | 16624124 | CSAR_peak_! | 6.81,9.58 -    |
| chr3 | 16624163 | 16624240 | CSAR_peak_  | 40.67,28.96 -  |
| chr3 | 16624304 | 16624441 | CSAR_peak_  | 16.11,22.74,-  |
| chr3 | 16624660 | 16624705 | CSAR_peak_  | 6.21 -         |
| chr3 | 16624727 | 16624872 | CSAR_peak_  | 13.48,22.56 -  |
| chr3 | 16733573 | 16733662 | CSAR_peak_  | 17.82 -        |
| chr3 | 16734027 | 16734070 | CSAR_peak_  | 8.39,6.03 -    |
| chr3 | 16734276 | 16734318 | CSAR_peak_  | 16.11,12.13 -  |
| chr3 | 16734871 | 16734916 | CSAR_peak_  | 8.39 -         |
| chr3 | 16735342 | 16735491 | CSAR_peak_  | 17.82,17.82 -  |
| chr3 | 16746476 | 16746539 | CSAR_peak_  | 14.88,12.17 -  |
| chr3 | 16746612 | 16746670 | CSAR_peak_  | 7.27 -         |
| chr3 | 16750268 | 16750304 | CSAR_peak_  | 6.21 -         |
| chr3 | 16750764 | 16750833 | CSAR_peak_  | 7.27 -         |
| chr3 | 16750890 | 16750943 | CSAR_peak_  | 9.58 -         |
| chr3 | 16751990 | 16752036 | CSAR_peak_  | 9.58 -         |
| chr3 | 16752122 | 16752163 | CSAR_peak_  | 7.27,13.48,6.- |
| chr3 | 16752597 | 16752676 | CSAR_peak_  | 19.98,16.33 -  |
| chr3 | 16752760 | 16752894 | CSAR_peak_  | 11.35,22.52,-  |
| chr3 | 16753098 | 16753198 | CSAR_peak_  | 14.85,7.58 -   |
| chr3 | 16806889 | 16806948 | CSAR_peak_  | 16.11,19.36 -  |
| chr3 | 16807593 | 16807641 | CSAR_peak_  | 7.27 -         |
| chr3 | 16855921 | 16855977 | CSAR_peak_  | 8.39 -         |
| chr3 | 16857296 | 16857348 | CSAR_peak_  | 7.27 -         |
| chr3 | 16859204 | 16859217 | CSAR_peak_  | 6.21,8.39 -    |
| chr3 | 16859296 | 16859343 | CSAR_peak_  | 17.82 -        |
| chr3 | 16897650 | 16897707 | CSAR_peak_  | 7.27,7.27 -    |
| chr3 | 16897869 | 16897920 | CSAR_peak_  | 7.27 -         |
| chr3 | 16907784 | 16907914 | CSAR_peak_  | 24.21,6.12,7.- |

|      |          |          |            |                  |   |
|------|----------|----------|------------|------------------|---|
| chr3 | 16908062 | 16908258 | CSAR_peak_ | 31.72,23.49      | - |
| chr3 | 16909724 | 16909857 | CSAR_peak_ | 16.11,6.81       | - |
| chr3 | 16909943 | 16910030 | CSAR_peak_ | 23.03            | - |
| chr3 | 16910054 | 16910077 | CSAR_peak_ | 10.83            | - |
| chr3 | 16910085 | 16910141 | CSAR_peak_ | 14.76            | - |
| chr3 | 16910157 | 16910228 | CSAR_peak_ | 20.94,10.83      | - |
| chr3 | 16910676 | 16910710 | CSAR_peak_ | 9.58             | - |
| chr3 | 16913741 | 16913824 | CSAR_peak_ | 9.58,6.21        | - |
| chr3 | 16928555 | 16928611 | CSAR_peak_ | 7.27             | - |
| chr3 | 16928670 | 16928696 | CSAR_peak_ | 7.27             | - |
| chr3 | 16929303 | 16929373 | CSAR_peak_ | 12.31            | - |
| chr3 | 16930058 | 16930089 | CSAR_peak_ | 12.31            | - |
| chr3 | 16930290 | 16930341 | CSAR_peak_ | 6.44             | - |
| chr3 | 16930479 | 16930531 | CSAR_peak_ | 7.27             | - |
| chr3 | 17066359 | 17066430 | CSAR_peak_ | 8.39             | - |
| chr3 | 17089317 | 17089501 | CSAR_peak_ | 15.43,16.25,9.58 | - |
| chr3 | 17089534 | 17089575 | CSAR_peak_ | 12.74            | - |
| chr3 | 17090753 | 17090768 | CSAR_peak_ | 8.39             | - |
| chr3 | 17090852 | 17090897 | CSAR_peak_ | 12.13,9.58       | - |
| chr3 | 17091052 | 17091088 | CSAR_peak_ | 6.21             | - |
| chr3 | 17093396 | 17093482 | CSAR_peak_ | 7.27             | - |
| chr3 | 17094463 | 17094570 | CSAR_peak_ | 10.83,9.58       | - |
| chr3 | 17096524 | 17096560 | CSAR_peak_ | 8.39             | - |
| chr3 | 17125885 | 17125911 | CSAR_peak_ | 6.21             | - |
| chr3 | 17132465 | 17132526 | CSAR_peak_ | 7.27             | - |
| chr3 | 17132934 | 17133009 | CSAR_peak_ | 12.13            | - |
| chr3 | 17133074 | 17133221 | CSAR_peak_ | 7.27,12.13,10.83 | - |
| chr3 | 17134913 | 17134950 | CSAR_peak_ | 6.21             | - |
| chr3 | 17135051 | 17135111 | CSAR_peak_ | 10.83,14.88      | - |
| chr3 | 17135135 | 17135187 | CSAR_peak_ | 6.95             | - |
| chr3 | 17135366 | 17135410 | CSAR_peak_ | 9.58             | - |
| chr3 | 17177627 | 17177716 | CSAR_peak_ | 7.27             | - |
| chr3 | 17178241 | 17178331 | CSAR_peak_ | 13.48,12.13      | - |
| chr3 | 17178640 | 17178693 | CSAR_peak_ | 12.13            | - |
| chr3 | 17178865 | 17178944 | CSAR_peak_ | 13.29,7.73       | - |
| chr3 | 17178966 | 17179072 | CSAR_peak_ | 12.72,37.33,9.58 | - |
| chr3 | 17179074 | 17179230 | CSAR_peak_ | 10.92,10.31,9.58 | - |
| chr3 | 17179236 | 17179295 | CSAR_peak_ | 9.77,13.66       | - |
| chr3 | 17179350 | 17179558 | CSAR_peak_ | 14.88,16.33,9.58 | - |
| chr3 | 17179588 | 17179671 | CSAR_peak_ | 10.18,15.02      | - |
| chr3 | 17179749 | 17179785 | CSAR_peak_ | 13.48            | - |
| chr3 | 17179964 | 17180034 | CSAR_peak_ | 7.27,19.36       | - |

|      |          |          |            |              |   |
|------|----------|----------|------------|--------------|---|
| chr3 | 17181475 | 17181526 | CSAR_peak_ | 9.58         | - |
| chr3 | 17181563 | 17181624 | CSAR_peak_ | 12.31        | - |
| chr3 | 17182175 | 17182320 | CSAR_peak_ | 10.83,8.39   | - |
| chr3 | 17197949 | 17197981 | CSAR_peak_ | 6.21         | - |
| chr3 | 17198094 | 17198172 | CSAR_peak_ | 10.02,7.26   | - |
| chr3 | 17200408 | 17200456 | CSAR_peak_ | 13.48,9.77   | - |
| chr3 | 17200556 | 17200675 | CSAR_peak_ | 11.32,9.54,1 | - |
| chr3 | 17200697 | 17200864 | CSAR_peak_ | 24.21,16.19  | - |
| chr3 | 17200907 | 17200948 | CSAR_peak_ | 6.03         | - |
| chr3 | 17200951 | 17201126 | CSAR_peak_ | 29.28,27.67, | - |
| chr3 | 17201177 | 17201327 | CSAR_peak_ | 37.04,22.56  | - |
| chr3 | 17201333 | 17201457 | CSAR_peak_ | 18.95,44.49, | - |
| chr3 | 17201515 | 17201551 | CSAR_peak_ | 6.44         | - |
| chr3 | 17201572 | 17201673 | CSAR_peak_ | 20.43,9.31   | - |
| chr3 | 17201753 | 17201803 | CSAR_peak_ | 16.33        | - |
| chr3 | 17215217 | 17215322 | CSAR_peak_ | 8.39,6.21    | - |
| chr3 | 17215903 | 17215980 | CSAR_peak_ | 20.94,10.83  | - |
| chr3 | 17216297 | 17216344 | CSAR_peak_ | 10.31,5.95   | - |
| chr3 | 17216431 | 17216472 | CSAR_peak_ | 9.61         | - |
| chr3 | 17216947 | 17216997 | CSAR_peak_ | 7.27         | - |
| chr3 | 17217099 | 17217157 | CSAR_peak_ | 10.83        | - |
| chr3 | 17218196 | 17218261 | CSAR_peak_ | 8.39         | - |
| chr3 | 17242706 | 17242755 | CSAR_peak_ | 7.27         | - |
| chr3 | 17242994 | 17243058 | CSAR_peak_ | 13.48        | - |
| chr3 | 17246719 | 17246792 | CSAR_peak_ | 9.58,14.88   | - |
| chr3 | 17246913 | 17246963 | CSAR_peak_ | 7.27         | - |
| chr3 | 17281929 | 17282010 | CSAR_peak_ | 6.1,6.21     | - |
| chr3 | 17293367 | 17293394 | CSAR_peak_ | 7.27         | - |
| chr3 | 17295958 | 17296022 | CSAR_peak_ | 7.27         | - |
| chr3 | 17296097 | 17296148 | CSAR_peak_ | 13.48        | - |
| chr3 | 17296195 | 17296287 | CSAR_peak_ | 9.77,7.27    | - |
| chr3 | 17296380 | 17296445 | CSAR_peak_ | 8.39         | - |
| chr3 | 17296968 | 17296987 | CSAR_peak_ | 7.27         | - |
| chr3 | 17297157 | 17297208 | CSAR_peak_ | 7.92,9.58    | - |
| chr3 | 17301728 | 17301777 | CSAR_peak_ | 10.83        | - |
| chr3 | 17302401 | 17302459 | CSAR_peak_ | 10.83,7.27   | - |
| chr3 | 17302769 | 17302833 | CSAR_peak_ | 8.39,7.27    | - |
| chr3 | 17303151 | 17303216 | CSAR_peak_ | 13.51,8.39   | - |
| chr3 | 17303446 | 17303490 | CSAR_peak_ | 7.58         | - |
| chr3 | 17303810 | 17303863 | CSAR_peak_ | 6.21         | - |
| chr3 | 17304191 | 17304334 | CSAR_peak_ | 14.88,7.27,1 | - |
| chr3 | 17305091 | 17305159 | CSAR_peak_ | 10.31        | - |

|      |          |          |            |                   |   |
|------|----------|----------|------------|-------------------|---|
| chr3 | 17305298 | 17305371 | CSAR_peak_ | 8.39,6.03         | - |
| chr3 | 17305707 | 17305748 | CSAR_peak_ | 6.21              | - |
| chr3 | 17305899 | 17306073 | CSAR_peak_ | 14.88,9.48,10.48  | - |
| chr3 | 17306080 | 17306143 | CSAR_peak_ | 18.95             | - |
| chr3 | 17306234 | 17306243 | CSAR_peak_ | 6.21              | - |
| chr3 | 17306940 | 17307004 | CSAR_peak_ | 12.31             | - |
| chr3 | 17307416 | 17307457 | CSAR_peak_ | 7.27              | - |
| chr3 | 17314241 | 17314296 | CSAR_peak_ | 7.27              | - |
| chr3 | 17314380 | 17314432 | CSAR_peak_ | 8.39              | - |
| chr3 | 17315339 | 17315368 | CSAR_peak_ | 7.27              | - |
| chr3 | 17315457 | 17315496 | CSAR_peak_ | 7.27              | - |
| chr3 | 17315697 | 17315826 | CSAR_peak_ | 12.59,24.21,10.48 | - |
| chr3 | 17316497 | 17316572 | CSAR_peak_ | 10.95             | - |
| chr3 | 17318206 | 17318295 | CSAR_peak_ | 12.13,9.58        | - |
| chr3 | 17346516 | 17346581 | CSAR_peak_ | 8.39,7.27         | - |
| chr3 | 17347056 | 17347123 | CSAR_peak_ | 8.2,16.33         | - |
| chr3 | 17347843 | 17347892 | CSAR_peak_ | 7.27              | - |
| chr3 | 17350045 | 17350097 | CSAR_peak_ | 7.27,6.21         | - |
| chr3 | 17351375 | 17351548 | CSAR_peak_ | 7.27,14.76,9.58   | - |
| chr3 | 17351695 | 17351781 | CSAR_peak_ | 12.17,6.03        | - |
| chr3 | 17358759 | 17358797 | CSAR_peak_ | 5.86              | - |
| chr3 | 17360178 | 17360253 | CSAR_peak_ | 7.27,6.21         | - |
| chr3 | 17360295 | 17360503 | CSAR_peak_ | 12.13,15.21,10.48 | - |
| chr3 | 17360524 | 17360554 | CSAR_peak_ | 7.58              | - |
| chr3 | 17360622 | 17360754 | CSAR_peak_ | 46.91,19.48       | - |
| chr3 | 17360815 | 17360913 | CSAR_peak_ | 14.88,19.45,10.48 | - |
| chr3 | 17360982 | 17361064 | CSAR_peak_ | 14.88,12.13       | - |
| chr3 | 17361135 | 17361146 | CSAR_peak_ | 9.58              | - |
| chr3 | 17361465 | 17361508 | CSAR_peak_ | 9.58              | - |
| chr3 | 17361589 | 17361709 | CSAR_peak_ | 31.2,26.69        | - |
| chr3 | 17361806 | 17361890 | CSAR_peak_ | 59.38,21.26       | - |
| chr3 | 17438048 | 17438139 | CSAR_peak_ | 39.34,23.03       | - |
| chr3 | 17438159 | 17438436 | CSAR_peak_ | 19.28,33.12,10.48 | - |
| chr3 | 17438450 | 17438618 | CSAR_peak_ | 21.86,22.56       | - |
| chr3 | 17438651 | 17438794 | CSAR_peak_ | 40.14,10.69,10.48 | - |
| chr3 | 17438803 | 17438872 | CSAR_peak_ | 24.21             | - |
| chr3 | 17438876 | 17439368 | CSAR_peak_ | 50.81,8.2,94.58   | - |
| chr3 | 17439416 | 17439887 | CSAR_peak_ | 59.72,10.31,10.48 | - |
| chr3 | 17439908 | 17440093 | CSAR_peak_ | 24.71,25.07       | - |
| chr3 | 17440114 | 17440774 | CSAR_peak_ | 29.4,7.27,50.81   | - |
| chr3 | 17440805 | 17440923 | CSAR_peak_ | 22.56,28.19       | - |
| chr3 | 17440964 | 17441120 | CSAR_peak_ | 14.22,63.81,10.48 | - |

|      |          |          |            |              |   |
|------|----------|----------|------------|--------------|---|
| chr3 | 17454406 | 17454462 | CSAR_peak_ | 8.39         | - |
| chr3 | 17472595 | 17472660 | CSAR_peak_ | 14.88,9.58   | - |
| chr3 | 17472756 | 17472883 | CSAR_peak_ | 10.02        | - |
| chr3 | 17472998 | 17473034 | CSAR_peak_ | 9.77         | - |
| chr3 | 17473064 | 17473135 | CSAR_peak_ | 13.29,10.83  | - |
| chr3 | 17473293 | 17473701 | CSAR_peak_ | 13.51,14.88, | - |
| chr3 | 17473745 | 17473924 | CSAR_peak_ | 6.94,13.85,1 | - |
| chr3 | 17473926 | 17473984 | CSAR_peak_ | 9.77         | - |
| chr3 | 17474024 | 17474107 | CSAR_peak_ | 9.58,13.48   | - |
| chr3 | 17474142 | 17474260 | CSAR_peak_ | 13.85,17.88  | - |
| chr3 | 17475058 | 17475103 | CSAR_peak_ | 7.27,10.02   | - |
| chr3 | 17483352 | 17483402 | CSAR_peak_ | 14.88        | - |
| chr3 | 17484293 | 17484334 | CSAR_peak_ | 7.27         | - |
| chr3 | 17485268 | 17485318 | CSAR_peak_ | 8.14         | - |
| chr3 | 17488748 | 17488797 | CSAR_peak_ | 6.21         | - |
| chr3 | 17493090 | 17493140 | CSAR_peak_ | 12.13        | - |
| chr3 | 17493221 | 17493272 | CSAR_peak_ | 6.21         | - |
| chr3 | 17493443 | 17493487 | CSAR_peak_ | 7.58         | - |
| chr3 | 17493488 | 17493567 | CSAR_peak_ | 14.76        | - |
| chr3 | 17493645 | 17493704 | CSAR_peak_ | 12.11,11.27  | - |
| chr3 | 17493843 | 17493936 | CSAR_peak_ | 12.6,7.58    | - |
| chr3 | 17493956 | 17494065 | CSAR_peak_ | 15.43,8.3    | - |
| chr3 | 17494070 | 17494148 | CSAR_peak_ | 6.57,17.82,1 | - |
| chr3 | 17494176 | 17494208 | CSAR_peak_ | 8.2,5.9      | - |
| chr3 | 17494266 | 17494352 | CSAR_peak_ | 16.22,6.1    | - |
| chr3 | 17494362 | 17494424 | CSAR_peak_ | 14.88,7.27   | - |
| chr3 | 17494438 | 17494517 | CSAR_peak_ | 10.83,13.48  | - |
| chr3 | 17494582 | 17494674 | CSAR_peak_ | 14.22        | - |
| chr3 | 17504031 | 17504075 | CSAR_peak_ | 7.58         | - |
| chr3 | 17504200 | 17504289 | CSAR_peak_ | 25.91,14.88  | - |
| chr3 | 17504341 | 17504391 | CSAR_peak_ | 14.88        | - |
| chr3 | 17504400 | 17504567 | CSAR_peak_ | 24.17,15.68  | - |
| chr3 | 17504810 | 17504849 | CSAR_peak_ | 7.27         | - |
| chr3 | 17504880 | 17504959 | CSAR_peak_ | 8.28,6.44    | - |
| chr3 | 17505146 | 17505245 | CSAR_peak_ | 8.95,12.13   | - |
| chr3 | 17505260 | 17505482 | CSAR_peak_ | 35.7,24.21,2 | - |
| chr3 | 17505794 | 17505861 | CSAR_peak_ | 23.89,12.6,7 | - |
| chr3 | 17505892 | 17505912 | CSAR_peak_ | 9.77,6.21    | - |
| chr3 | 17525716 | 17525780 | CSAR_peak_ | 6.57         | - |
| chr3 | 17525875 | 17525960 | CSAR_peak_ | 6.57         | - |
| chr3 | 17526519 | 17526569 | CSAR_peak_ | 7.27         | - |
| chr3 | 17576090 | 17576134 | CSAR_peak_ | 8.39         | - |

|      |          |          |            |                |   |
|------|----------|----------|------------|----------------|---|
| chr3 | 17576136 | 17576183 | CSAR_peak_ | 7.92           | - |
| chr3 | 17576817 | 17576858 | CSAR_peak_ | 7.27           | - |
| chr3 | 17576908 | 17576972 | CSAR_peak_ | 9.58,6.81      | - |
| chr3 | 17577004 | 17577062 | CSAR_peak_ | 9.77,7.58      | - |
| chr3 | 17577608 | 17577746 | CSAR_peak_ | 5.62,6.57,12.  | - |
| chr3 | 17577821 | 17577871 | CSAR_peak_ | 12.17          | - |
| chr3 | 17577960 | 17578025 | CSAR_peak_ | 16.05,6.44     | - |
| chr3 | 17578045 | 17578119 | CSAR_peak_ | 16.33,6.44     | - |
| chr3 | 17578686 | 17578851 | CSAR_peak_ | 14.88,12.61,1. | - |
| chr3 | 17579011 | 17579091 | CSAR_peak_ | 12.27,13.48    | - |
| chr3 | 17579313 | 17579362 | CSAR_peak_ | 9.58           | - |
| chr3 | 17595120 | 17595185 | CSAR_peak_ | 7.27           | - |
| chr3 | 17595322 | 17595377 | CSAR_peak_ | 7.27           | - |
| chr3 | 17595433 | 17595481 | CSAR_peak_ | 9.58           | - |
| chr3 | 17596702 | 17596707 | CSAR_peak_ | 6.21           | - |
| chr3 | 17596795 | 17596846 | CSAR_peak_ | 11.14,17.82    | - |
| chr3 | 17597326 | 17597380 | CSAR_peak_ | 12.13          | - |
| chr3 | 17597620 | 17597670 | CSAR_peak_ | 7.27           | - |
| chr3 | 17637418 | 17637527 | CSAR_peak_ | 12.17          | - |
| chr3 | 17638193 | 17638243 | CSAR_peak_ | 7.27           | - |
| chr3 | 17664982 | 17665040 | CSAR_peak_ | 7.27,17.82     | - |
| chr3 | 17665602 | 17665652 | CSAR_peak_ | 6.21           | - |
| chr3 | 17666329 | 17666424 | CSAR_peak_ | 13.48,6.21     | - |
| chr3 | 17666727 | 17666801 | CSAR_peak_ | 14.88,7.27     | - |
| chr3 | 17667110 | 17667159 | CSAR_peak_ | 9.58           | - |
| chr3 | 17669155 | 17669234 | CSAR_peak_ | 9.58,13.44     | - |
| chr3 | 17669500 | 17669571 | CSAR_peak_ | 6.57,12.13     | - |
| chr3 | 17669858 | 17669905 | CSAR_peak_ | 7.27,6.21      | - |
| chr3 | 17670123 | 17670166 | CSAR_peak_ | 9.58           | - |
| chr3 | 17670454 | 17670472 | CSAR_peak_ | 12.13          | - |
| chr3 | 17670548 | 17670645 | CSAR_peak_ | 7.92,27.64     | - |
| chr3 | 17670905 | 17670958 | CSAR_peak_ | 8.39           | - |
| chr3 | 17671298 | 17671352 | CSAR_peak_ | 9.58,9.58      | - |
| chr3 | 17671387 | 17671449 | CSAR_peak_ | 7.27           | - |
| chr3 | 17671486 | 17671565 | CSAR_peak_ | 7.27,7.27      | - |
| chr3 | 17672183 | 17672259 | CSAR_peak_ | 9.58           | - |
| chr3 | 17672760 | 17672860 | CSAR_peak_ | 8.28,8.14      | - |
| chr3 | 17672950 | 17673007 | CSAR_peak_ | 17.82          | - |
| chr3 | 17675139 | 17675264 | CSAR_peak_ | 6.44,9.58      | - |
| chr3 | 17676382 | 17676475 | CSAR_peak_ | 6.21           | - |
| chr3 | 17676839 | 17676893 | CSAR_peak_ | 9.58           | - |
| chr3 | 17677234 | 17677285 | CSAR_peak_ | 16.33,6.57     | - |

|      |          |          |            |               |   |
|------|----------|----------|------------|---------------|---|
| chr3 | 17677597 | 17677644 | CSAR_peak_ | 12.13,6.21    | - |
| chr3 | 17677728 | 17677779 | CSAR_peak_ | 7.27          | - |
| chr3 | 17678291 | 17678348 | CSAR_peak_ | 13.48         | - |
| chr3 | 17679942 | 17679993 | CSAR_peak_ | 7.27,24.21    | - |
| chr3 | 17698123 | 17698338 | CSAR_peak_ | 18.1,12.31    | - |
| chr3 | 17698543 | 17698634 | CSAR_peak_ | 26.05,19.96   | - |
| chr3 | 17698931 | 17699048 | CSAR_peak_ | 31.2,30.8     | - |
| chr3 | 17699137 | 17699174 | CSAR_peak_ | 8.39,9.58     | - |
| chr3 | 17699270 | 17699407 | CSAR_peak_ | 9.77,13.66,1  | - |
| chr3 | 17699619 | 17699713 | CSAR_peak_ | 20.43         | - |
| chr3 | 17699842 | 17699910 | CSAR_peak_ | 6.21          | - |
| chr3 | 17699939 | 17699951 | CSAR_peak_ | 7.27          | - |
| chr3 | 17699957 | 17700006 | CSAR_peak_ | 29.4          | - |
| chr3 | 17700136 | 17700186 | CSAR_peak_ | 7.27          | - |
| chr3 | 17700451 | 17700505 | CSAR_peak_ | 7.27          | - |
| chr3 | 17700554 | 17700694 | CSAR_peak_ | 10.82,8.28,1  | - |
| chr3 | 17713838 | 17713897 | CSAR_peak_ | 6.21          | - |
| chr3 | 17714827 | 17714906 | CSAR_peak_ | 6.95,12.31    | - |
| chr3 | 17714918 | 17714966 | CSAR_peak_ | 12.13         | - |
| chr3 | 17715330 | 17715391 | CSAR_peak_ | 9.61          | - |
| chr3 | 17715471 | 17715570 | CSAR_peak_ | 12.59,42.59,  | - |
| chr3 | 17717782 | 17717829 | CSAR_peak_ | 6.85          | - |
| chr3 | 17718191 | 17718286 | CSAR_peak_ | 15.2,7.61     | - |
| chr3 | 17718311 | 17718352 | CSAR_peak_ | 11.66         | - |
| chr3 | 17718426 | 17718454 | CSAR_peak_ | 6.57,9.32     | - |
| chr3 | 17718804 | 17718918 | CSAR_peak_ | 12.13         | - |
| chr3 | 17719055 | 17719083 | CSAR_peak_ | 6.03,6.21     | - |
| chr3 | 17719174 | 17719211 | CSAR_peak_ | 7.92,5.86,6.2 | - |
| chr3 | 17719507 | 17719553 | CSAR_peak_ | 7.27          | - |
| chr3 | 17735484 | 17735523 | CSAR_peak_ | 6.21          | - |
| chr3 | 17735898 | 17735960 | CSAR_peak_ | 7.27          | - |
| chr3 | 17735984 | 17736050 | CSAR_peak_ | 16.33,8.39    | - |
| chr3 | 17736237 | 17736287 | CSAR_peak_ | 7.27          | - |
| chr3 | 17736340 | 17736415 | CSAR_peak_ | 14.88,13.44   | - |
| chr3 | 17736479 | 17736590 | CSAR_peak_ | 28.21,9.77    | - |
| chr3 | 17736872 | 17736915 | CSAR_peak_ | 6.21          | - |
| chr3 | 17736927 | 17736986 | CSAR_peak_ | 10.83,9.58    | - |
| chr3 | 17737853 | 17737942 | CSAR_peak_ | 8.39,6.21     | - |
| chr3 | 17738054 | 17738107 | CSAR_peak_ | 7.27          | - |
| chr3 | 17738263 | 17738325 | CSAR_peak_ | 6.21          | - |
| chr3 | 17738353 | 17738430 | CSAR_peak_ | 10.83,8.39    | - |
| chr3 | 17738496 | 17738558 | CSAR_peak_ | 12.13         | - |



|      |          |          |            |               |   |
|------|----------|----------|------------|---------------|---|
| chr3 | 17739423 | 17739508 | CSAR_peak_ | 13.44         | - |
| chr3 | 17746811 | 17746900 | CSAR_peak_ | 8.39,6.21     | - |
| chr3 | 17748398 | 17748466 | CSAR_peak_ | 9.58,10.31    | - |
| chr3 | 17753321 | 17753382 | CSAR_peak_ | 10.83         | - |
| chr3 | 17753424 | 17753483 | CSAR_peak_ | 7.27          | - |
| chr3 | 17753487 | 17753560 | CSAR_peak_ | 9.58          | - |
| chr3 | 17753823 | 17753897 | CSAR_peak_ | 12.13         | - |
| chr3 | 17755541 | 17755590 | CSAR_peak_ | 12.13         | - |
| chr3 | 17755737 | 17755998 | CSAR_peak_ | 25.91,9.58,1  | - |
| chr3 | 17756222 | 17756274 | CSAR_peak_ | 9.58,13.48    | - |
| chr3 | 17756390 | 17756469 | CSAR_peak_ | 7.27,10.82,1  | - |
| chr3 | 17756567 | 17756650 | CSAR_peak_ | 9.58          | - |
| chr3 | 17758833 | 17758886 | CSAR_peak_ | 9.58          | - |
| chr3 | 17758898 | 17759034 | CSAR_peak_ | 24.15,38.71   | - |
| chr3 | 17759150 | 17759279 | CSAR_peak_ | 11.83,10.18   | - |
| chr3 | 17759302 | 17759374 | CSAR_peak_ | 9.77,7.27     | - |
| chr3 | 17759540 | 17759575 | CSAR_peak_ | 10.83         | - |
| chr3 | 17759671 | 17759742 | CSAR_peak_ | 22.56         | - |
| chr3 | 17759795 | 17759862 | CSAR_peak_ | 17.82,9.58    | - |
| chr3 | 17759878 | 17760002 | CSAR_peak_ | 6.81,24.21,9. | - |
| chr3 | 17760037 | 17760161 | CSAR_peak_ | 31.73,18.65   | - |
| chr3 | 17760224 | 17760341 | CSAR_peak_ | 31.13,40.76   | - |
| chr3 | 17760343 | 17760560 | CSAR_peak_ | 22.56,7.77,2  | - |
| chr3 | 17760590 | 17760763 | CSAR_peak_ | 31.2,23.8,6.9 | - |
| chr3 | 17786362 | 17786381 | CSAR_peak_ | 12.31         | - |
| chr3 | 17786530 | 17786595 | CSAR_peak_ | 23.03         | - |
| chr3 | 17787889 | 17787937 | CSAR_peak_ | 9.58          | - |
| chr3 | 17788914 | 17788958 | CSAR_peak_ | 6.21          | - |
| chr3 | 17789006 | 17789059 | CSAR_peak_ | 6.21          | - |
| chr3 | 17828827 | 17828882 | CSAR_peak_ | 7.27,7.58     | - |
| chr3 | 17831562 | 17831603 | CSAR_peak_ | 6.21          | - |
| chr3 | 17831804 | 17831850 | CSAR_peak_ | 7.58,7.27     | - |
| chr3 | 17833029 | 17833090 | CSAR_peak_ | 7.58,9.58     | - |
| chr3 | 17834374 | 17834441 | CSAR_peak_ | 6.21          | - |
| chr3 | 17835106 | 17835133 | CSAR_peak_ | 6.21          | - |
| chr3 | 17836059 | 17836095 | CSAR_peak_ | 9.58          | - |
| chr3 | 17836185 | 17836230 | CSAR_peak_ | 7.27          | - |
| chr3 | 17836659 | 17836705 | CSAR_peak_ | 6.44          | - |
| chr3 | 17836892 | 17836920 | CSAR_peak_ | 6.21          | - |
| chr3 | 17893449 | 17893490 | CSAR_peak_ | 13.48         | - |
| chr3 | 17893541 | 17893589 | CSAR_peak_ | 7.27          | - |
| chr3 | 17906533 | 17906587 | CSAR_peak_ | 9.58,8.39     | - |

|      |          |          |            |                |   |
|------|----------|----------|------------|----------------|---|
| chr3 | 17907287 | 17907358 | CSAR_peak_ | 9.58           | - |
| chr3 | 17908133 | 17908244 | CSAR_peak_ | 12.13,9.58     | - |
| chr3 | 17908272 | 17908413 | CSAR_peak_ | 10.31,16.33,,- |   |
| chr3 | 17908427 | 17908589 | CSAR_peak_ | 7.61,32.03,1,- |   |
| chr3 | 17908591 | 17908770 | CSAR_peak_ | 19.36,8.39,1(- |   |
| chr3 | 17908772 | 17908834 | CSAR_peak_ | 13.48,6.21     | - |
| chr3 | 17908845 | 17908895 | CSAR_peak_ | 9.58,10.83     | - |
| chr3 | 17908943 | 17909031 | CSAR_peak_ | 23.44,29.28    | - |
| chr3 | 17909057 | 17909281 | CSAR_peak_ | 32.49,48.47    | - |
| chr3 | 17909293 | 17909469 | CSAR_peak_ | 25.16,12.13,(- |   |
| chr3 | 17909555 | 17909668 | CSAR_peak_ | 21.6,26.91     | - |
| chr3 | 17909709 | 17909782 | CSAR_peak_ | 21.34,14.52    | - |
| chr3 | 17909786 | 17909995 | CSAR_peak_ | 54.09,9.87,6.- |   |
| chr3 | 17910005 | 17910490 | CSAR_peak_ | 13.66,74.29,,- |   |
| chr3 | 17974628 | 17974681 | CSAR_peak_ | 10.83,7.27     | - |
| chr3 | 17974766 | 17974977 | CSAR_peak_ | 36.74,74.98    | - |
| chr3 | 17975050 | 17975175 | CSAR_peak_ | 7.58,25.18     | - |
| chr3 | 17975194 | 17975312 | CSAR_peak_ | 44.27,28.22    | - |
| chr3 | 17975340 | 17975394 | CSAR_peak_ | 14.92,18.1     | - |
| chr3 | 17975442 | 17975597 | CSAR_peak_ | 29.2,21.37     | - |
| chr3 | 17975619 | 17976014 | CSAR_peak_ | 23.85,6.74,2,- |   |
| chr3 | 17976016 | 17976067 | CSAR_peak_ | 9.03           | - |
| chr3 | 17976109 | 17976152 | CSAR_peak_ | 8.09           | - |
| chr3 | 17976231 | 17976320 | CSAR_peak_ | 22.69,10.94    | - |
| chr3 | 17976325 | 17976552 | CSAR_peak_ | 26.37,15.32,,- |   |
| chr3 | 18002323 | 18002362 | CSAR_peak_ | 7.27           | - |
| chr3 | 18002647 | 18002701 | CSAR_peak_ | 6.21           | - |
| chr3 | 18005415 | 18005471 | CSAR_peak_ | 17.82          | - |
| chr3 | 18007475 | 18007568 | CSAR_peak_ | 8.39,14.76     | - |
| chr3 | 18007710 | 18007763 | CSAR_peak_ | 8.95           | - |
| chr3 | 18008275 | 18008342 | CSAR_peak_ | 8.2,9.77,9.58- |   |
| chr3 | 18008798 | 18008868 | CSAR_peak_ | 7.27,13.48     | - |
| chr3 | 18052884 | 18052925 | CSAR_peak_ | 6.45           | - |
| chr3 | 18053006 | 18053082 | CSAR_peak_ | 9.77           | - |
| chr3 | 18053727 | 18053768 | CSAR_peak_ | 17.82          | - |
| chr3 | 18053863 | 18053868 | CSAR_peak_ | 8.39           | - |
| chr3 | 18053875 | 18053938 | CSAR_peak_ | 7.27           | - |
| chr3 | 18122545 | 18122633 | CSAR_peak_ | 9.58           | - |
| chr3 | 18123451 | 18123563 | CSAR_peak_ | 7.92,7.27,13.- |   |
| chr3 | 18124098 | 18124142 | CSAR_peak_ | 7.27           | - |
| chr3 | 18124656 | 18124720 | CSAR_peak_ | 9.58           | - |
| chr3 | 18124911 | 18124952 | CSAR_peak_ | 6.21           | - |

|      |          |          |            |               |   |
|------|----------|----------|------------|---------------|---|
| chr3 | 18124989 | 18125034 | CSAR_peak_ | 7.7           | - |
| chr3 | 18125125 | 18125208 | CSAR_peak_ | 12.17,7.27,6. | - |
| chr3 | 18142178 | 18142216 | CSAR_peak_ | 7.27          | - |
| chr3 | 18155252 | 18155293 | CSAR_peak_ | 7.58          | - |
| chr3 | 18155558 | 18155602 | CSAR_peak_ | 5.86          | - |
| chr3 | 18157641 | 18157716 | CSAR_peak_ | 9.58,16.33    | - |
| chr3 | 18158846 | 18158918 | CSAR_peak_ | 7.27          | - |
| chr3 | 18158989 | 18159095 | CSAR_peak_ | 29.04,30.21   | - |
| chr3 | 18159138 | 18159220 | CSAR_peak_ | 10.8,15.42    | - |
| chr3 | 18159351 | 18159426 | CSAR_peak_ | 6.21,6.87     | - |
| chr3 | 18159467 | 18159482 | CSAR_peak_ | 20.43         | - |
| chr3 | 18159731 | 18159819 | CSAR_peak_ | 6.03,24.52,7. | - |
| chr3 | 18159862 | 18160398 | CSAR_peak_ | 14.92,10.18,; | - |
| chr3 | 18160414 | 18160485 | CSAR_peak_ | 7.27          | - |
| chr3 | 18160661 | 18160711 | CSAR_peak_ | 7.27          | - |
| chr3 | 18160718 | 18160782 | CSAR_peak_ | 9.58          | - |
| chr3 | 18160824 | 18160898 | CSAR_peak_ | 13.92         | - |
| chr3 | 18161091 | 18161177 | CSAR_peak_ | 8.39,6.21     | - |
| chr3 | 18161233 | 18161303 | CSAR_peak_ | 10.94         | - |
| chr3 | 18166980 | 18167058 | CSAR_peak_ | 6.37          | - |
| chr3 | 18167404 | 18167450 | CSAR_peak_ | 8.39          | - |
| chr3 | 18167710 | 18167759 | CSAR_peak_ | 6.85          | - |
| chr3 | 18186180 | 18186255 | CSAR_peak_ | 8.65          | - |
| chr3 | 18188673 | 18188785 | CSAR_peak_ | 25.91         | - |
| chr3 | 18188792 | 18188850 | CSAR_peak_ | 14.88         | - |
| chr3 | 18190693 | 18190761 | CSAR_peak_ | 7.27          | - |
| chr3 | 18191162 | 18191232 | CSAR_peak_ | 12.13         | - |
| chr3 | 18191788 | 18191810 | CSAR_peak_ | 7.27          | - |
| chr3 | 18212135 | 18212224 | CSAR_peak_ | 9.58          | - |
| chr3 | 18212471 | 18212490 | CSAR_peak_ | 9.58          | - |
| chr3 | 18212598 | 18212688 | CSAR_peak_ | 14.88,10.83   | - |
| chr3 | 18212985 | 18213068 | CSAR_peak_ | 22.56,14.85   | - |
| chr3 | 18213084 | 18213188 | CSAR_peak_ | 29.4,13.85    | - |
| chr3 | 18213402 | 18213511 | CSAR_peak_ | 15.2,7.61     | - |
| chr3 | 18213529 | 18213605 | CSAR_peak_ | 19.45,13.51   | - |
| chr3 | 18213696 | 18213771 | CSAR_peak_ | 10.94,23.83   | - |
| chr3 | 18213819 | 18213861 | CSAR_peak_ | 7.73,14.88    | - |
| chr3 | 18214282 | 18214350 | CSAR_peak_ | 7.27,6.21     | - |
| chr3 | 18214743 | 18214835 | CSAR_peak_ | 9.58,5.86,7.2 | - |
| chr3 | 18214878 | 18214963 | CSAR_peak_ | 16.25,7.7     | - |
| chr3 | 18220921 | 18221017 | CSAR_peak_ | 13.48,7.27    | - |
| chr3 | 18222024 | 18222087 | CSAR_peak_ | 19.36         | - |

|      |          |          |            |                |
|------|----------|----------|------------|----------------|
| chr3 | 18222329 | 18222530 | CSAR_peak_ | 14.08,24.21,-  |
| chr3 | 18222766 | 18222832 | CSAR_peak_ | 8.28 -         |
| chr3 | 18222946 | 18223052 | CSAR_peak_ | 9.61,17.82 -   |
| chr3 | 18223082 | 18223171 | CSAR_peak_ | 35.24,15.21,-  |
| chr3 | 18223190 | 18223247 | CSAR_peak_ | 13.48,13.51 -  |
| chr3 | 18223403 | 18223631 | CSAR_peak_ | 13.29,12.13 -  |
| chr3 | 18223660 | 18223788 | CSAR_peak_ | 27.64,18.73 -  |
| chr3 | 18223798 | 18223956 | CSAR_peak_ | 10.83,7.27,9.- |
| chr3 | 18224006 | 18224067 | CSAR_peak_ | 6.21 -         |
| chr3 | 18224386 | 18224434 | CSAR_peak_ | 16.11,12.17 -  |
| chr3 | 18224730 | 18224782 | CSAR_peak_ | 9.97,17.82 -   |
| chr3 | 18238737 | 18238799 | CSAR_peak_ | 7.27 -         |
| chr3 | 18239987 | 18240030 | CSAR_peak_ | 7.27 -         |
| chr3 | 18297724 | 18297761 | CSAR_peak_ | 7.27 -         |
| chr3 | 18297915 | 18298007 | CSAR_peak_ | 6.21 -         |
| chr3 | 18298769 | 18298854 | CSAR_peak_ | 19.36,8.39 -   |
| chr3 | 18316447 | 18316499 | CSAR_peak_ | 7.27 -         |
| chr3 | 18344949 | 18344998 | CSAR_peak_ | 6.21 -         |
| chr3 | 18345126 | 18345194 | CSAR_peak_ | 8.39,6.21 -    |
| chr3 | 18346387 | 18346435 | CSAR_peak_ | 9.58 -         |
| chr3 | 18360701 | 18360778 | CSAR_peak_ | 12.13,7.27 -   |
| chr3 | 18361043 | 18361112 | CSAR_peak_ | 16.33,9.77 -   |
| chr3 | 18361272 | 18361313 | CSAR_peak_ | 6.21 -         |
| chr3 | 18361343 | 18361469 | CSAR_peak_ | 7.58,14.88 -   |
| chr3 | 18361476 | 18361526 | CSAR_peak_ | 10.31 -        |
| chr3 | 18361935 | 18362049 | CSAR_peak_ | 16.33,19.36 -  |
| chr3 | 18362068 | 18362298 | CSAR_peak_ | 6.21,20.13,7.- |
| chr3 | 18362349 | 18362456 | CSAR_peak_ | 31.2,42.87 -   |
| chr3 | 18362485 | 18362546 | CSAR_peak_ | 14.88 -        |
| chr3 | 18362639 | 18362673 | CSAR_peak_ | 6.21 -         |
| chr3 | 18362681 | 18362896 | CSAR_peak_ | 7.27,7.92,6.8- |
| chr3 | 18362972 | 18363079 | CSAR_peak_ | 24.01,22.52 -  |
| chr3 | 18363100 | 18363171 | CSAR_peak_ | 12.13,9.77 -   |
| chr3 | 18363266 | 18363388 | CSAR_peak_ | 15.2,7.73 -    |
| chr3 | 18363507 | 18363595 | CSAR_peak_ | 20.94,10.02 -  |
| chr3 | 18363632 | 18363691 | CSAR_peak_ | 29.4,9.58 -    |
| chr3 | 18363727 | 18363808 | CSAR_peak_ | 7.27 -         |
| chr3 | 18363845 | 18363895 | CSAR_peak_ | 6.87,14.88 -   |
| chr3 | 18363989 | 18364127 | CSAR_peak_ | 9.41,14.88 -   |
| chr3 | 18364141 | 18364197 | CSAR_peak_ | 11.14 -        |
| chr3 | 18364244 | 18364270 | CSAR_peak_ | 6.21 -         |
| chr3 | 18364539 | 18364632 | CSAR_peak_ | 31.19,36.89 -  |

|      |          |          |            |               |   |
|------|----------|----------|------------|---------------|---|
| chr3 | 18380864 | 18380933 | CSAR_peak_ | 10.96         | - |
| chr3 | 18381114 | 18381164 | CSAR_peak_ | 9.58,7        | - |
| chr3 | 18381354 | 18381428 | CSAR_peak_ | 9.58          | - |
| chr3 | 18383949 | 18384003 | CSAR_peak_ | 12.13         | - |
| chr3 | 18384844 | 18384891 | CSAR_peak_ | 7.27          | - |
| chr3 | 18388065 | 18388177 | CSAR_peak_ | 9.58,8.39     | - |
| chr3 | 18388496 | 18388595 | CSAR_peak_ | 6.21          | - |
| chr3 | 18401493 | 18401609 | CSAR_peak_ | 12.23,10.83   | - |
| chr3 | 18403144 | 18403192 | CSAR_peak_ | 12.13         | - |
| chr3 | 18403407 | 18403445 | CSAR_peak_ | 8.65          | - |
| chr3 | 18403536 | 18403583 | CSAR_peak_ | 12.31,9.77    | - |
| chr3 | 18403996 | 18404076 | CSAR_peak_ | 7.27          | - |
| chr3 | 18404376 | 18404480 | CSAR_peak_ | 22.74,7.92    | - |
| chr3 | 18437932 | 18438069 | CSAR_peak_ | 17.51,8.2,14. | - |
| chr3 | 18438116 | 18438227 | CSAR_peak_ | 19.36,10.83   | - |
| chr3 | 18438313 | 18438409 | CSAR_peak_ | 21.94,12.13   | - |
| chr3 | 18438607 | 18438678 | CSAR_peak_ | 9.58          | - |
| chr3 | 18438940 | 18438994 | CSAR_peak_ | 7.58          | - |
| chr3 | 18439268 | 18439319 | CSAR_peak_ | 6.21          | - |
| chr3 | 18440104 | 18440165 | CSAR_peak_ | 29.4,17.82    | - |
| chr3 | 18440252 | 18440360 | CSAR_peak_ | 17.37,34.89   | - |
| chr3 | 18440549 | 18440653 | CSAR_peak_ | 17.82,17.82   | - |
| chr3 | 18440741 | 18440847 | CSAR_peak_ | 11.07,18.95   | - |
| chr3 | 18440931 | 18440963 | CSAR_peak_ | 7.06          | - |
| chr3 | 18441022 | 18441081 | CSAR_peak_ | 22.58,8.39    | - |
| chr3 | 18441607 | 18441716 | CSAR_peak_ | 27.64,13.66   | - |
| chr3 | 18441823 | 18441874 | CSAR_peak_ | 6.21          | - |
| chr3 | 18468427 | 18468527 | CSAR_peak_ | 7.27          | - |
| chr3 | 18472841 | 18472901 | CSAR_peak_ | 14.76         | - |
| chr3 | 18473162 | 18473215 | CSAR_peak_ | 8.39          | - |
| chr3 | 18492690 | 18492748 | CSAR_peak_ | 7.27          | - |
| chr3 | 18492908 | 18492938 | CSAR_peak_ | 6.21          | - |
| chr3 | 18493111 | 18493158 | CSAR_peak_ | 6.21          | - |
| chr3 | 18493991 | 18494024 | CSAR_peak_ | 6.21          | - |
| chr3 | 18532911 | 18532991 | CSAR_peak_ | 10.02,13.48   | - |
| chr3 | 18554145 | 18554192 | CSAR_peak_ | 6.21          | - |
| chr3 | 18554227 | 18554301 | CSAR_peak_ | 9.58          | - |
| chr3 | 18556140 | 18556196 | CSAR_peak_ | 6.21          | - |
| chr3 | 18556721 | 18556771 | CSAR_peak_ | 7.58          | - |
| chr3 | 18558231 | 18558276 | CSAR_peak_ | 10.31         | - |
| chr3 | 18558335 | 18558426 | CSAR_peak_ | 8.39          | - |
| chr3 | 18615671 | 18615719 | CSAR_peak_ | 7.58          | - |

|      |          |          |            |               |   |
|------|----------|----------|------------|---------------|---|
| chr3 | 18623450 | 18623496 | CSAR_peak_ | 7.27          | - |
| chr3 | 18623993 | 18624043 | CSAR_peak_ | 6.21          | - |
| chr3 | 18624454 | 18624480 | CSAR_peak_ | 6.21          | - |
| chr3 | 18624660 | 18624725 | CSAR_peak_ | 6.21          | - |
| chr3 | 18625606 | 18625672 | CSAR_peak_ | 10.33         | - |
| chr3 | 18625733 | 18625795 | CSAR_peak_ | 14.88,19.36   | - |
| chr3 | 18625914 | 18626024 | CSAR_peak_ | 9.55,9.61     | - |
| chr3 | 18626113 | 18626130 | CSAR_peak_ | 10.83         | - |
| chr3 | 18626377 | 18626403 | CSAR_peak_ | 6.21          | - |
| chr3 | 18626480 | 18626521 | CSAR_peak_ | 6.21          | - |
| chr3 | 18627152 | 18627220 | CSAR_peak_ | 8.39          | - |
| chr3 | 18627527 | 18627540 | CSAR_peak_ | 11.96,9.58    | - |
| chr3 | 18627647 | 18627707 | CSAR_peak_ | 22.52,19.96   | - |
| chr3 | 18627852 | 18627895 | CSAR_peak_ | 6.21          | - |
| chr3 | 18628662 | 18628694 | CSAR_peak_ | 6.21          | - |
| chr3 | 18679062 | 18679118 | CSAR_peak_ | 7.27          | - |
| chr3 | 18679231 | 18679293 | CSAR_peak_ | 10.31,6.57    | - |
| chr3 | 18679454 | 18679510 | CSAR_peak_ | 7.58          | - |
| chr3 | 18679654 | 18679710 | CSAR_peak_ | 9.58          | - |
| chr3 | 18680796 | 18680924 | CSAR_peak_ | 17.82,8.65,1  | - |
| chr3 | 18681520 | 18681569 | CSAR_peak_ | 6.21          | - |
| chr3 | 18682055 | 18682359 | CSAR_peak_ | 12.59,8.65,1  | - |
| chr3 | 18682601 | 18682654 | CSAR_peak_ | 13.51         | - |
| chr3 | 18683892 | 18684018 | CSAR_peak_ | 7.27,5.62,7.2 | - |
| chr3 | 18687465 | 18687564 | CSAR_peak_ | 9.77,10.83    | - |
| chr3 | 18688028 | 18688076 | CSAR_peak_ | 7.27          | - |
| chr3 | 18689097 | 18689140 | CSAR_peak_ | 12.13         | - |
| chr3 | 18689933 | 18690057 | CSAR_peak_ | 16.77,12.31   | - |
| chr3 | 18690617 | 18690665 | CSAR_peak_ | 10.83         | - |
| chr3 | 18690825 | 18690873 | CSAR_peak_ | 6.21,7.27     | - |
| chr3 | 18690978 | 18691038 | CSAR_peak_ | 8.39          | - |
| chr3 | 18691268 | 18691328 | CSAR_peak_ | 9.58          | - |
| chr3 | 18691351 | 18691408 | CSAR_peak_ | 7.27,7.27     | - |
| chr3 | 18692336 | 18692386 | CSAR_peak_ | 6.57          | - |
| chr3 | 18693869 | 18693929 | CSAR_peak_ | 9.58          | - |
| chr3 | 18694114 | 18694159 | CSAR_peak_ | 7.58,7.27     | - |
| chr3 | 18696614 | 18696654 | CSAR_peak_ | 9.58          | - |
| chr3 | 18698253 | 18698354 | CSAR_peak_ | 20.43,8.39    | - |
| chr3 | 18698437 | 18698498 | CSAR_peak_ | 9.58          | - |
| chr3 | 18700107 | 18700168 | CSAR_peak_ | 7.27,9.58     | - |
| chr3 | 18700253 | 18700299 | CSAR_peak_ | 9.58,6.21     | - |
| chr3 | 18741848 | 18741905 | CSAR_peak_ | 9.58          | - |

|      |          |          |            |               |   |
|------|----------|----------|------------|---------------|---|
| chr3 | 18741998 | 18742058 | CSAR_peak_ | 10.31,6.21    | - |
| chr3 | 18742076 | 18742137 | CSAR_peak_ | 19.36,24.21   | - |
| chr3 | 18742170 | 18742253 | CSAR_peak_ | 8.65,21.94    | - |
| chr3 | 18742378 | 18742454 | CSAR_peak_ | 33.47,8.13    | - |
| chr3 | 18742612 | 18742685 | CSAR_peak_ | 14.08,20.94   | - |
| chr3 | 18742910 | 18742997 | CSAR_peak_ | 8.5,6.85,16.1 | - |
| chr3 | 18743092 | 18743131 | CSAR_peak_ | 7.26          | - |
| chr3 | 18743178 | 18743324 | CSAR_peak_ | 13.48,7,7.92  | - |
| chr3 | 18743423 | 18743504 | CSAR_peak_ | 28.34,7.27    | - |
| chr3 | 18743721 | 18743788 | CSAR_peak_ | 17.51,10.02,  | - |
| chr3 | 18743814 | 18743868 | CSAR_peak_ | 9.58          | - |
| chr3 | 18761840 | 18761898 | CSAR_peak_ | 9.77          | - |
| chr3 | 18761927 | 18761990 | CSAR_peak_ | 20.94         | - |
| chr3 | 18763694 | 18763754 | CSAR_peak_ | 19.36         | - |
| chr3 | 18815663 | 18815730 | CSAR_peak_ | 7.27          | - |
| chr3 | 18826452 | 18826619 | CSAR_peak_ | 18.95,8.39    | - |
| chr3 | 18826776 | 18826855 | CSAR_peak_ | 11.56         | - |
| chr3 | 18826863 | 18826892 | CSAR_peak_ | 7.92          | - |
| chr3 | 18826957 | 18826966 | CSAR_peak_ | 8.19          | - |
| chr3 | 18827046 | 18827107 | CSAR_peak_ | 10.12,13.29   | - |
| chr3 | 18827127 | 18827180 | CSAR_peak_ | 8.3,9.41      | - |
| chr3 | 18827182 | 18827229 | CSAR_peak_ | 8.09          | - |
| chr3 | 18827236 | 18827260 | CSAR_peak_ | 10.13         | - |
| chr3 | 18827358 | 18827454 | CSAR_peak_ | 17.82,7.27    | - |
| chr3 | 18827540 | 18827615 | CSAR_peak_ | 9.77,10.95,8. | - |
| chr3 | 18827712 | 18827765 | CSAR_peak_ | 12.13         | - |
| chr3 | 18828292 | 18828412 | CSAR_peak_ | 9.58,12.92    | - |
| chr3 | 18828506 | 18828571 | CSAR_peak_ | 7.31,6.95,16. | - |
| chr3 | 18828658 | 18828734 | CSAR_peak_ | 6.32,11.35,8. | - |
| chr3 | 18828824 | 18828894 | CSAR_peak_ | 6.44,6.21     | - |
| chr3 | 18828984 | 18829038 | CSAR_peak_ | 7.27,9.77     | - |
| chr3 | 18835242 | 18835310 | CSAR_peak_ | 14.88,8.39    | - |
| chr3 | 18835423 | 18835473 | CSAR_peak_ | 10.02         | - |
| chr3 | 18835995 | 18836142 | CSAR_peak_ | 12.17,6.81    | - |
| chr3 | 18836143 | 18836201 | CSAR_peak_ | 5.86          | - |
| chr3 | 18836364 | 18836520 | CSAR_peak_ | 7.27,5.62     | - |
| chr3 | 18836608 | 18836642 | CSAR_peak_ | 7.58          | - |
| chr3 | 18862823 | 18862911 | CSAR_peak_ | 8.39          | - |
| chr3 | 18880670 | 18880729 | CSAR_peak_ | 9.58          | - |
| chr3 | 18891111 | 18891187 | CSAR_peak_ | 7.27          | - |
| chr3 | 18891194 | 18891277 | CSAR_peak_ | 8.28          | - |
| chr3 | 18891422 | 18891470 | CSAR_peak_ | 7.27,6.03     | - |

|      |          |          |            |                |   |
|------|----------|----------|------------|----------------|---|
| chr3 | 18891602 | 18891680 | CSAR_peak_ | 11.14,9.77     | - |
| chr3 | 18893232 | 18893308 | CSAR_peak_ | 9.65,8.24,30.  | - |
| chr3 | 18893397 | 18893487 | CSAR_peak_ | 85.88,36.03,;  | - |
| chr3 | 18894187 | 18894238 | CSAR_peak_ | 19.36          | - |
| chr3 | 18894257 | 18894302 | CSAR_peak_ | 12.13,12.13    | - |
| chr3 | 18895240 | 18895284 | CSAR_peak_ | 8.39           | - |
| chr3 | 18895319 | 18895394 | CSAR_peak_ | 17.82          | - |
| chr3 | 18895417 | 18895479 | CSAR_peak_ | 12.13          | - |
| chr3 | 18896733 | 18896834 | CSAR_peak_ | 16.33,8.39     | - |
| chr3 | 18945397 | 18945458 | CSAR_peak_ | 7.27           | - |
| chr3 | 18980537 | 18980587 | CSAR_peak_ | 7.27           | - |
| chr3 | 18988238 | 18988302 | CSAR_peak_ | 13.48          | - |
| chr3 | 18988544 | 18988624 | CSAR_peak_ | 12.23,6.57,6.- | - |
| chr3 | 18988734 | 18988785 | CSAR_peak_ | 9.77,12.13     | - |
| chr3 | 18988868 | 18988912 | CSAR_peak_ | 9.58           | - |
| chr3 | 18989080 | 18989126 | CSAR_peak_ | 6.21           | - |
| chr3 | 18989518 | 18989531 | CSAR_peak_ | 7.58           | - |
| chr3 | 18990166 | 18990197 | CSAR_peak_ | 7.27           | - |
| chr3 | 18990769 | 18990804 | CSAR_peak_ | 7.27           | - |
| chr3 | 19007547 | 19007619 | CSAR_peak_ | 7.58           | - |
| chr3 | 19033452 | 19033471 | CSAR_peak_ | 7.58           | - |
| chr3 | 19044737 | 19044834 | CSAR_peak_ | 9.58           | - |
| chr3 | 19044969 | 19045089 | CSAR_peak_ | 8.39,7.58,6.5- | - |
| chr3 | 19045220 | 19045337 | CSAR_peak_ | 7.27,13.29,1(- | - |
| chr3 | 19045400 | 19045508 | CSAR_peak_ | 24.21          | - |
| chr3 | 19045588 | 19045595 | CSAR_peak_ | 7.27           | - |
| chr3 | 19046010 | 19046068 | CSAR_peak_ | 16.11          | - |
| chr3 | 19046257 | 19046322 | CSAR_peak_ | 12.17,10.18    | - |
| chr3 | 19046396 | 19046515 | CSAR_peak_ | 17.82,8.39,8.- | - |
| chr3 | 19046614 | 19046672 | CSAR_peak_ | 11.38          | - |
| chr3 | 19046832 | 19046982 | CSAR_peak_ | 17.82,7.27     | - |
| chr3 | 19047132 | 19047165 | CSAR_peak_ | 7.27           | - |
| chr3 | 19047476 | 19047517 | CSAR_peak_ | 9.72,6.44      | - |
| chr3 | 19048137 | 19048160 | CSAR_peak_ | 14.88          | - |
| chr3 | 19048166 | 19048205 | CSAR_peak_ | 8.19           | - |
| chr3 | 19048367 | 19048405 | CSAR_peak_ | 10.83          | - |
| chr3 | 19055317 | 19055373 | CSAR_peak_ | 10.83          | - |
| chr3 | 19078229 | 19078281 | CSAR_peak_ | 6.21           | - |
| chr3 | 19116111 | 19116237 | CSAR_peak_ | 17.82,5.86     | - |
| chr3 | 19116393 | 19116509 | CSAR_peak_ | 12.13,12.13    | - |
| chr3 | 19116571 | 19116639 | CSAR_peak_ | 6.44,8.39      | - |
| chr3 | 19117143 | 19117223 | CSAR_peak_ | 9.48,5.9       | - |



|      |          |          |            |               |   |
|------|----------|----------|------------|---------------|---|
| chr3 | 19117693 | 19117753 | CSAR_peak_ | 25.91,17.37   | - |
| chr3 | 19117850 | 19118256 | CSAR_peak_ | 29.28,13.48,  | - |
| chr3 | 19118281 | 19118342 | CSAR_peak_ | 7.27          | - |
| chr3 | 19118382 | 19118487 | CSAR_peak_ | 11.38,12.13   | - |
| chr3 | 19118665 | 19118674 | CSAR_peak_ | 7.58          | - |
| chr3 | 19118681 | 19118723 | CSAR_peak_ | 6.21          | - |
| chr3 | 19118737 | 19118848 | CSAR_peak_ | 10.83         | - |
| chr3 | 19118876 | 19118914 | CSAR_peak_ | 13.48         | - |
| chr3 | 19119171 | 19119272 | CSAR_peak_ | 7.27,7.27     | - |
| chr3 | 19119308 | 19119363 | CSAR_peak_ | 10.83         | - |
| chr3 | 19119418 | 19119585 | CSAR_peak_ | 10.95,21.94,  | - |
| chr3 | 19119783 | 19119840 | CSAR_peak_ | 12.17,19.98   | - |
| chr3 | 19119855 | 19119912 | CSAR_peak_ | 11.14         | - |
| chr3 | 19119917 | 19119966 | CSAR_peak_ | 24.21,14.88   | - |
| chr3 | 19120181 | 19120262 | CSAR_peak_ | 12.13,20.94   | - |
| chr3 | 19120296 | 19120371 | CSAR_peak_ | 14.76,12.13   | - |
| chr3 | 19120395 | 19120470 | CSAR_peak_ | 16.11         | - |
| chr3 | 19120624 | 19120696 | CSAR_peak_ | 8.28,7.34,8.3 | - |
| chr3 | 19120759 | 19120812 | CSAR_peak_ | 6.21          | - |
| chr3 | 19131165 | 19131212 | CSAR_peak_ | 7.27          | - |
| chr3 | 19132358 | 19132399 | CSAR_peak_ | 7.27          | - |
| chr3 | 19138778 | 19138835 | CSAR_peak_ | 9.27          | - |
| chr3 | 19138924 | 19138989 | CSAR_peak_ | 10.02         | - |
| chr3 | 19139047 | 19139075 | CSAR_peak_ | 7.27,6.21     | - |
| chr3 | 19139099 | 19139149 | CSAR_peak_ | 7.58,13.51    | - |
| chr3 | 19140864 | 19140907 | CSAR_peak_ | 6.21          | - |
| chr3 | 19141721 | 19141773 | CSAR_peak_ | 8.39          | - |
| chr3 | 19164325 | 19164400 | CSAR_peak_ | 14.88         | - |
| chr3 | 19164973 | 19165030 | CSAR_peak_ | 7.27          | - |
| chr3 | 19201060 | 19201110 | CSAR_peak_ | 7.27          | - |
| chr3 | 19202200 | 19202250 | CSAR_peak_ | 6.21          | - |
| chr3 | 19206995 | 19207063 | CSAR_peak_ | 13.48         | - |
| chr3 | 19207134 | 19207159 | CSAR_peak_ | 7.27          | - |
| chr3 | 19207205 | 19207227 | CSAR_peak_ | 9.58,6.85     | - |
| chr3 | 19207315 | 19207335 | CSAR_peak_ | 7.92,7.27     | - |
| chr3 | 19207722 | 19207811 | CSAR_peak_ | 14.88         | - |
| chr3 | 19212088 | 19212217 | CSAR_peak_ | 9.77,7.73     | - |
| chr3 | 19212619 | 19212700 | CSAR_peak_ | 8.65,6.97,9.8 | - |
| chr3 | 19213475 | 19213512 | CSAR_peak_ | 7.27          | - |
| chr3 | 19213540 | 19213577 | CSAR_peak_ | 6.03          | - |
| chr3 | 19218217 | 19218255 | CSAR_peak_ | 13.48         | - |
| chr3 | 19218658 | 19218697 | CSAR_peak_ | 7.27          | - |

|      |          |          |            |               |   |
|------|----------|----------|------------|---------------|---|
| chr3 | 19218784 | 19218820 | CSAR_peak_ | 6.21          | - |
| chr3 | 19224843 | 19224894 | CSAR_peak_ | 8.39          | - |
| chr3 | 19225192 | 19225224 | CSAR_peak_ | 7.92          | - |
| chr3 | 19225507 | 19225550 | CSAR_peak_ | 9.77,6.21     | - |
| chr3 | 19225585 | 19225655 | CSAR_peak_ | 10.83,7.27    | - |
| chr3 | 19225665 | 19225682 | CSAR_peak_ | 9.77          | - |
| chr3 | 19225715 | 19225970 | CSAR_peak_ | 20.54,16.77,1 | - |
| chr3 | 19226435 | 19226529 | CSAR_peak_ | 16.54,14.59,1 | - |
| chr3 | 19226548 | 19226565 | CSAR_peak_ | 8.52          | - |
| chr3 | 19226583 | 19226611 | CSAR_peak_ | 12.9          | - |
| chr3 | 19226698 | 19226793 | CSAR_peak_ | 15.1,31.73    | - |
| chr3 | 19226896 | 19226967 | CSAR_peak_ | 12.14,16.87   | - |
| chr3 | 19227010 | 19227056 | CSAR_peak_ | 33.75,9.72    | - |
| chr3 | 19227130 | 19227225 | CSAR_peak_ | 9.77,10.83    | - |
| chr3 | 19227302 | 19227507 | CSAR_peak_ | 41.63,15.56,1 | - |
| chr3 | 19227548 | 19227651 | CSAR_peak_ | 11.48,21.37,1 | - |
| chr3 | 19227657 | 19227844 | CSAR_peak_ | 17.88,30.25,1 | - |
| chr3 | 19227914 | 19228028 | CSAR_peak_ | 14.76,7.27,1  | - |
| chr3 | 19228125 | 19228201 | CSAR_peak_ | 12.11,6.72,3  | - |
| chr3 | 19228297 | 19228342 | CSAR_peak_ | 15.02,11.99   | - |
| chr3 | 19228354 | 19228404 | CSAR_peak_ | 10.83,7.27    | - |
| chr3 | 19228557 | 19228696 | CSAR_peak_ | 22.58,10.83   | - |
| chr3 | 19228963 | 19229058 | CSAR_peak_ | 9.35,25.62    | - |
| chr3 | 19247126 | 19247190 | CSAR_peak_ | 8.65,14.88    | - |
| chr3 | 19247246 | 19247301 | CSAR_peak_ | 9.48          | - |
| chr3 | 19247457 | 19247504 | CSAR_peak_ | 8.39,8.9      | - |
| chr3 | 19247601 | 19247671 | CSAR_peak_ | 8.65,8.14,8.1 | - |
| chr3 | 19247768 | 19247812 | CSAR_peak_ | 7.27          | - |
| chr3 | 19248427 | 19248500 | CSAR_peak_ | 7.73,17.51    | - |
| chr3 | 19268327 | 19268338 | CSAR_peak_ | 7.27          | - |
| chr3 | 19268820 | 19268950 | CSAR_peak_ | 25.18,9.58,6. | - |
| chr3 | 19268985 | 19269055 | CSAR_peak_ | 10.95,6.21    | - |
| chr3 | 19269139 | 19269194 | CSAR_peak_ | 12.17         | - |
| chr3 | 19269267 | 19269331 | CSAR_peak_ | 9.58          | - |
| chr3 | 19277595 | 19277654 | CSAR_peak_ | 14.88         | - |
| chr3 | 19277928 | 19277989 | CSAR_peak_ | 10.83         | - |
| chr3 | 19278212 | 19278305 | CSAR_peak_ | 17.82,12.13   | - |
| chr3 | 19278410 | 19278450 | CSAR_peak_ | 9.58          | - |
| chr3 | 19278482 | 19278590 | CSAR_peak_ | 7.27,5.95,7.3 | - |
| chr3 | 19278667 | 19278726 | CSAR_peak_ | 17.4,13.85,8. | - |
| chr3 | 19279287 | 19279350 | CSAR_peak_ | 14.88,6.87    | - |
| chr3 | 19279613 | 19279635 | CSAR_peak_ | 7.27          | - |

|      |          |          |            |                  |   |
|------|----------|----------|------------|------------------|---|
| chr3 | 19279734 | 19279770 | CSAR_peak_ | 7.27             | - |
| chr3 | 19279955 | 19279985 | CSAR_peak_ | 5.86             | - |
| chr3 | 19279988 | 19280054 | CSAR_peak_ | 7.51,12.13       | - |
| chr3 | 19280055 | 19280120 | CSAR_peak_ | 10.83            | - |
| chr3 | 19280204 | 19280248 | CSAR_peak_ | 6.21             | - |
| chr3 | 19280280 | 19280317 | CSAR_peak_ | 6.21             | - |
| chr3 | 19280352 | 19280417 | CSAR_peak_ | 14.88            | - |
| chr3 | 19280575 | 19280641 | CSAR_peak_ | 6.03             | - |
| chr3 | 19283712 | 19283803 | CSAR_peak_ | 8.14,6.21,7.5    | - |
| chr3 | 19310689 | 19310750 | CSAR_peak_ | 10.02            | - |
| chr3 | 19311014 | 19311053 | CSAR_peak_ | 7.27             | - |
| chr3 | 19311141 | 19311180 | CSAR_peak_ | 9.58             | - |
| chr3 | 19318946 | 19319008 | CSAR_peak_ | 8.39             | - |
| chr3 | 19347361 | 19347429 | CSAR_peak_ | 13.48            | - |
| chr3 | 19349966 | 19350025 | CSAR_peak_ | 8.39             | - |
| chr3 | 19350128 | 19350201 | CSAR_peak_ | 6.85             | - |
| chr3 | 19350287 | 19350351 | CSAR_peak_ | 16.11,7.27       | - |
| chr3 | 19350613 | 19350678 | CSAR_peak_ | 12.13            | - |
| chr3 | 19350850 | 19350899 | CSAR_peak_ | 9.58,8.39        | - |
| chr3 | 19351710 | 19351771 | CSAR_peak_ | 6.21             | - |
| chr3 | 19352097 | 19352135 | CSAR_peak_ | 7.27             | - |
| chr3 | 19353018 | 19353099 | CSAR_peak_ | 6.21,9.58        | - |
| chr3 | 19354781 | 19354822 | CSAR_peak_ | 7.36             | - |
| chr3 | 19356843 | 19356914 | CSAR_peak_ | 9.58             | - |
| chr3 | 19370051 | 19370104 | CSAR_peak_ | 6.81             | - |
| chr3 | 19372881 | 19372919 | CSAR_peak_ | 7.27             | - |
| chr3 | 19374601 | 19374741 | CSAR_peak_ | 14.88,5.86,10.83 | - |
| chr3 | 19374776 | 19374820 | CSAR_peak_ | 7.27             | - |
| chr3 | 19375050 | 19375104 | CSAR_peak_ | 7.27,9.58        | - |
| chr3 | 19375124 | 19375171 | CSAR_peak_ | 6.21             | - |
| chr3 | 19375177 | 19375222 | CSAR_peak_ | 6.21             | - |
| chr3 | 19389385 | 19389427 | CSAR_peak_ | 7.27             | - |
| chr3 | 19423516 | 19423577 | CSAR_peak_ | 9.58,6.95        | - |
| chr3 | 19424806 | 19424854 | CSAR_peak_ | 7.27             | - |
| chr3 | 19426196 | 19426297 | CSAR_peak_ | 12.12,12.17      | - |
| chr3 | 19426530 | 19426639 | CSAR_peak_ | 17.37,12.13      | - |
| chr3 | 19426703 | 19426770 | CSAR_peak_ | 12.13,9.58       | - |
| chr3 | 19452749 | 19452800 | CSAR_peak_ | 6.21             | - |
| chr3 | 19465927 | 19465983 | CSAR_peak_ | 19.36,8.39       | - |
| chr3 | 19466525 | 19466573 | CSAR_peak_ | 7.27             | - |
| chr3 | 19495396 | 19495409 | CSAR_peak_ | 7.27,8.65        | - |
| chr3 | 19495921 | 19495959 | CSAR_peak_ | 6.21,7.27        | - |

|      |          |          |            |                |   |
|------|----------|----------|------------|----------------|---|
| chr3 | 19516040 | 19516074 | CSAR_peak_ | 6.21           | - |
| chr3 | 19539692 | 19539788 | CSAR_peak_ | 10.31,8.28     | - |
| chr3 | 19543147 | 19543205 | CSAR_peak_ | 6.57,12.13     | - |
| chr3 | 19543699 | 19543762 | CSAR_peak_ | 9.58           | - |
| chr3 | 19544186 | 19544220 | CSAR_peak_ | 6.21           | - |
| chr3 | 19593647 | 19593806 | CSAR_peak_ | 30.81,7.27     | - |
| chr3 | 19593827 | 19593876 | CSAR_peak_ | 12.13          | - |
| chr3 | 19593912 | 19594011 | CSAR_peak_ | 18.73,9.58     | - |
| chr3 | 19594142 | 19594235 | CSAR_peak_ | 6.52,14.88     | - |
| chr3 | 19594332 | 19594428 | CSAR_peak_ | 19.36,22.52    | - |
| chr3 | 19594565 | 19594611 | CSAR_peak_ | 8.65,6.21,9.7  | - |
| chr3 | 19594776 | 19594878 | CSAR_peak_ | 10.02,11.28    | - |
| chr3 | 19594955 | 19595000 | CSAR_peak_ | 12.13,6.44,7.  | - |
| chr3 | 19595232 | 19595296 | CSAR_peak_ | 12.27,5.86     | - |
| chr3 | 19595307 | 19595377 | CSAR_peak_ | 8.39,7.27      | - |
| chr3 | 19595456 | 19595564 | CSAR_peak_ | 16.11,20.76    | - |
| chr3 | 19602049 | 19602102 | CSAR_peak_ | 7.27           | - |
| chr3 | 19602760 | 19602813 | CSAR_peak_ | 8.13           | - |
| chr3 | 19602822 | 19602866 | CSAR_peak_ | 8.13           | - |
| chr3 | 19603354 | 19603391 | CSAR_peak_ | 7.27           | - |
| chr3 | 19603663 | 19603714 | CSAR_peak_ | 18.4,10.95,10. | - |
| chr3 | 19627349 | 19627409 | CSAR_peak_ | 6.44,6.21      | - |
| chr3 | 19627419 | 19627577 | CSAR_peak_ | 19.36,6.21     | - |
| chr3 | 19627602 | 19627670 | CSAR_peak_ | 20.54,9.77     | - |
| chr3 | 19627927 | 19628018 | CSAR_peak_ | 13.51,6.57     | - |
| chr3 | 19660855 | 19660909 | CSAR_peak_ | 7.27,14.88     | - |
| chr3 | 19661249 | 19661292 | CSAR_peak_ | 8.39           | - |
| chr3 | 19661483 | 19661524 | CSAR_peak_ | 11.38          | - |
| chr3 | 19661921 | 19661974 | CSAR_peak_ | 8.2            | - |
| chr3 | 19685931 | 19685966 | CSAR_peak_ | 7.27           | - |
| chr3 | 19686309 | 19686359 | CSAR_peak_ | 7.27,7         | - |
| chr3 | 19744366 | 19744445 | CSAR_peak_ | 8.28,7.27      | - |
| chr3 | 19745421 | 19745470 | CSAR_peak_ | 7.27           | - |
| chr3 | 19745601 | 19745660 | CSAR_peak_ | 9.77           | - |
| chr3 | 19745915 | 19746006 | CSAR_peak_ | 9.03,7.27      | - |
| chr3 | 19746216 | 19746266 | CSAR_peak_ | 13.48,14.88    | - |
| chr3 | 19746303 | 19746360 | CSAR_peak_ | 9.27           | - |
| chr3 | 19746393 | 19746538 | CSAR_peak_ | 10.7,10.31     | - |
| chr3 | 19746541 | 19746564 | CSAR_peak_ | 6.21           | - |
| chr3 | 19750454 | 19750490 | CSAR_peak_ | 6.95           | - |
| chr3 | 19751985 | 19751995 | CSAR_peak_ | 6.87           | - |
| chr3 | 19752112 | 19752155 | CSAR_peak_ | 9.48,13.51     | - |

|      |          |          |            |                |   |
|------|----------|----------|------------|----------------|---|
| chr3 | 19798068 | 19798135 | CSAR_peak_ | 9.58           | - |
| chr3 | 19800385 | 19800437 | CSAR_peak_ | 8.39           | - |
| chr3 | 19801175 | 19801225 | CSAR_peak_ | 12.13          | - |
| chr3 | 19801728 | 19801770 | CSAR_peak_ | 7.27           | - |
| chr3 | 19803840 | 19804067 | CSAR_peak_ | 12.13,13.44,   | - |
| chr3 | 19804107 | 19804282 | CSAR_peak_ | 46.67,22.52,   | - |
| chr3 | 19804428 | 19804512 | CSAR_peak_ | 14.88,9.72     | - |
| chr3 | 19804549 | 19804611 | CSAR_peak_ | 24.21,11.66    | - |
| chr3 | 19804632 | 19804680 | CSAR_peak_ | 18.95          | - |
| chr3 | 19805124 | 19805286 | CSAR_peak_ | 10.33,28.23    | - |
| chr3 | 19805309 | 19805360 | CSAR_peak_ | 12.17          | - |
| chr3 | 19805398 | 19805504 | CSAR_peak_ | 33.36,32.51    | - |
| chr3 | 19809554 | 19809653 | CSAR_peak_ | 9.58,12.17     | - |
| chr3 | 19810226 | 19810286 | CSAR_peak_ | 33.47,11.14    | - |
| chr3 | 19810357 | 19810409 | CSAR_peak_ | 13.85          | - |
| chr3 | 19818811 | 19818961 | CSAR_peak_ | 12.13,14.88    | - |
| chr3 | 19819004 | 19819089 | CSAR_peak_ | 19.36,13.48    | - |
| chr3 | 19819199 | 19819249 | CSAR_peak_ | 7.27           | - |
| chr3 | 19819268 | 19819519 | CSAR_peak_ | 32.27,27.11,   | - |
| chr3 | 19819540 | 19819684 | CSAR_peak_ | 6.57,31.2,10.  | - |
| chr3 | 19819692 | 19819870 | CSAR_peak_ | 8.39,21.78,6.  | - |
| chr3 | 19819894 | 19820110 | CSAR_peak_ | 16.78,11.75,   | - |
| chr3 | 19820156 | 19820281 | CSAR_peak_ | 14.88,26.69    | - |
| chr3 | 19820301 | 19820332 | CSAR_peak_ | 8.9            | - |
| chr3 | 19820335 | 19820455 | CSAR_peak_ | 22.32,9.55,30. | - |
| chr3 | 19820458 | 19820525 | CSAR_peak_ | 8.65           | - |
| chr3 | 19820559 | 19820844 | CSAR_peak_ | 23.89,43.44,   | - |
| chr3 | 19820860 | 19820986 | CSAR_peak_ | 35.24,6.32,29. | - |
| chr3 | 19820995 | 19821104 | CSAR_peak_ | 25.91,19.36,   | - |
| chr3 | 19821110 | 19821194 | CSAR_peak_ | 14.88,13.66    | - |
| chr3 | 19834305 | 19834349 | CSAR_peak_ | 8.39           | - |
| chr3 | 19834634 | 19834764 | CSAR_peak_ | 14.76,21.94    | - |
| chr3 | 19834844 | 19834873 | CSAR_peak_ | 9.58           | - |
| chr3 | 19835180 | 19835241 | CSAR_peak_ | 25.91          | - |
| chr3 | 19835370 | 19835478 | CSAR_peak_ | 11.06,13.44    | - |
| chr3 | 19835660 | 19835775 | CSAR_peak_ | 7.53,38.89,7.  | - |
| chr3 | 19835873 | 19835881 | CSAR_peak_ | 9.79,21.94     | - |
| chr3 | 19835892 | 19835996 | CSAR_peak_ | 20.94,14.88    | - |
| chr3 | 19836059 | 19836147 | CSAR_peak_ | 8.39,6.95      | - |
| chr3 | 19836163 | 19836234 | CSAR_peak_ | 13.48,6.81,6.  | - |
| chr3 | 19836401 | 19836515 | CSAR_peak_ | 17.35,12.17    | - |
| chr3 | 19848256 | 19848326 | CSAR_peak_ | 8.39           | - |

|      |          |          |            |                |   |
|------|----------|----------|------------|----------------|---|
| chr3 | 19848365 | 19848454 | CSAR_peak_ | 7.27           | - |
| chr3 | 19848559 | 19848706 | CSAR_peak_ | 7.27           | - |
| chr3 | 19859957 | 19860007 | CSAR_peak_ | 7.27           | - |
| chr3 | 19860207 | 19860284 | CSAR_peak_ | 6.21           | - |
| chr3 | 19861728 | 19861832 | CSAR_peak_ | 9.58,7.27      | - |
| chr3 | 19861974 | 19862016 | CSAR_peak_ | 7.27           | - |
| chr3 | 19862123 | 19862188 | CSAR_peak_ | 9.58           | - |
| chr3 | 19862276 | 19862328 | CSAR_peak_ | 6.21           | - |
| chr3 | 19863222 | 19863301 | CSAR_peak_ | 13             | - |
| chr3 | 19895831 | 19895899 | CSAR_peak_ | 6.03,12.13     | - |
| chr3 | 19902727 | 19902770 | CSAR_peak_ | 7.58           | - |
| chr3 | 19903948 | 19903968 | CSAR_peak_ | 7.27           | - |
| chr3 | 19904016 | 19904123 | CSAR_peak_ | 17.82,13.44    | - |
| chr3 | 19904195 | 19904217 | CSAR_peak_ | 9.58           | - |
| chr3 | 19904677 | 19904746 | CSAR_peak_ | 8.39           | - |
| chr3 | 19904821 | 19904991 | CSAR_peak_ | 8.39,7.27,7.2  | - |
| chr3 | 19913783 | 19913840 | CSAR_peak_ | 8.39,7.27      | - |
| chr3 | 19955589 | 19955648 | CSAR_peak_ | 6.03           | - |
| chr3 | 19961083 | 19961146 | CSAR_peak_ | 7.27           | - |
| chr3 | 19961627 | 19961680 | CSAR_peak_ | 7.27           | - |
| chr3 | 19962494 | 19962549 | CSAR_peak_ | 12.13,7.58,5.  | - |
| chr3 | 19989025 | 19989161 | CSAR_peak_ | 19.36,19.36    | - |
| chr3 | 19989289 | 19989343 | CSAR_peak_ | 8.39           | - |
| chr3 | 19989681 | 19989768 | CSAR_peak_ | 22.1,28.21     | - |
| chr3 | 19989902 | 19989948 | CSAR_peak_ | 7.27           | - |
| chr3 | 19989994 | 19990122 | CSAR_peak_ | 27.64,27.61    | - |
| chr3 | 19990288 | 19990356 | CSAR_peak_ | 9.58           | - |
| chr3 | 19990437 | 19990524 | CSAR_peak_ | 38.29,27.87    | - |
| chr3 | 19990539 | 19990625 | CSAR_peak_ | 21.94,13.09,.- | - |
| chr3 | 19990654 | 19990828 | CSAR_peak_ | 29.12,33.75,.- | - |
| chr3 | 19990899 | 19991050 | CSAR_peak_ | 31.72,41.12    | - |
| chr3 | 20035176 | 20035263 | CSAR_peak_ | 10.95,8.28     | - |
| chr3 | 20035390 | 20035483 | CSAR_peak_ | 7.27,6.21      | - |
| chr3 | 20035794 | 20035845 | CSAR_peak_ | 6.21           | - |
| chr3 | 20035942 | 20035991 | CSAR_peak_ | 10.02          | - |
| chr3 | 20036308 | 20036379 | CSAR_peak_ | 12.17,8.39     | - |
| chr3 | 20046800 | 20046853 | CSAR_peak_ | 13.44,14.88    | - |
| chr3 | 20047446 | 20047505 | CSAR_peak_ | 16.33,8.39     | - |
| chr3 | 20047528 | 20047604 | CSAR_peak_ | 7.27           | - |
| chr3 | 20063467 | 20063533 | CSAR_peak_ | 7.27           | - |
| chr3 | 20067719 | 20067840 | CSAR_peak_ | 13.66,7.92     | - |
| chr3 | 20067858 | 20067922 | CSAR_peak_ | 10.83          | - |

|      |          |          |            |                  |   |
|------|----------|----------|------------|------------------|---|
| chr3 | 20068041 | 20068156 | CSAR_peak_ | 8.65,8.14        | - |
| chr3 | 20105080 | 20105110 | CSAR_peak_ | 7.27             | - |
| chr3 | 20108528 | 20108568 | CSAR_peak_ | 9.58             | - |
| chr3 | 20109432 | 20109478 | CSAR_peak_ | 19.36            | - |
| chr3 | 20109639 | 20109658 | CSAR_peak_ | 6.21             | - |
| chr3 | 20109664 | 20109764 | CSAR_peak_ | 13.48            | - |
| chr3 | 20122754 | 20122795 | CSAR_peak_ | 6.21             | - |
| chr3 | 20123414 | 20123484 | CSAR_peak_ | 9.58             | - |
| chr3 | 20126023 | 20126065 | CSAR_peak_ | 6.21             | - |
| chr3 | 20126401 | 20126467 | CSAR_peak_ | 10.83            | - |
| chr3 | 20128739 | 20128771 | CSAR_peak_ | 5.86             | - |
| chr3 | 20134683 | 20134745 | CSAR_peak_ | 6.21             | - |
| chr3 | 20140565 | 20140660 | CSAR_peak_ | 13.48,22.56      | - |
| chr3 | 20140927 | 20140986 | CSAR_peak_ | 17.82            | - |
| chr3 | 20147324 | 20147387 | CSAR_peak_ | 13.51,24.21      | - |
| chr3 | 20149332 | 20149397 | CSAR_peak_ | 10.83            | - |
| chr3 | 20152175 | 20152222 | CSAR_peak_ | 6.21,6.57        | - |
| chr3 | 20153379 | 20153416 | CSAR_peak_ | 12.13            | - |
| chr3 | 20154071 | 20154104 | CSAR_peak_ | 6.21             | - |
| chr3 | 20156600 | 20156618 | CSAR_peak_ | 6.21             | - |
| chr3 | 20162194 | 20162245 | CSAR_peak_ | 12.13            | - |
| chr3 | 20162376 | 20162447 | CSAR_peak_ | 25.07,13.29      | - |
| chr3 | 20166686 | 20166740 | CSAR_peak_ | 6.57             | - |
| chr3 | 20171139 | 20171229 | CSAR_peak_ | 8.39             | - |
| chr3 | 20171705 | 20171822 | CSAR_peak_ | 10.83,9.58       | - |
| chr3 | 20174796 | 20174854 | CSAR_peak_ | 9.58             | - |
| chr3 | 20175316 | 20175414 | CSAR_peak_ | 13.48,7.27       | - |
| chr3 | 20175601 | 20175666 | CSAR_peak_ | 20.79,13.09      | - |
| chr3 | 20175779 | 20176081 | CSAR_peak_ | 39.31,6.51,34.5  | - |
| chr3 | 20176085 | 20176120 | CSAR_peak_ | 16.33            | - |
| chr3 | 20176306 | 20176623 | CSAR_peak_ | 43.7,45.5,53.1   | - |
| chr3 | 20176768 | 20176878 | CSAR_peak_ | 11.16,22.69      | - |
| chr3 | 20177012 | 20177227 | CSAR_peak_ | 25.62,22.39      | - |
| chr3 | 20177408 | 20177504 | CSAR_peak_ | 26.97,6.28,34.5  | - |
| chr3 | 20177527 | 20177592 | CSAR_peak_ | 12.62            | - |
| chr3 | 20177640 | 20177746 | CSAR_peak_ | 15.2,40.72       | - |
| chr3 | 20177811 | 20177855 | CSAR_peak_ | 7.27             | - |
| chr3 | 20177924 | 20178097 | CSAR_peak_ | 59.62,50.96      | - |
| chr3 | 20178147 | 20178453 | CSAR_peak_ | 73.88,35.01,34.5 | - |
| chr3 | 20178481 | 20178492 | CSAR_peak_ | 6.76             | - |
| chr3 | 20178714 | 20178894 | CSAR_peak_ | 8.81,18.73,34.5  | - |
| chr3 | 20178918 | 20178985 | CSAR_peak_ | 11.07,37.42,34.5 | - |

|      |          |          |            |                 |   |
|------|----------|----------|------------|-----------------|---|
| chr3 | 20217901 | 20217941 | CSAR_peak_ | 7.27            | - |
| chr3 | 20218135 | 20218187 | CSAR_peak_ | 9.61            | - |
| chr3 | 20218360 | 20218423 | CSAR_peak_ | 8.39,12.13      | - |
| chr3 | 20218456 | 20218566 | CSAR_peak_ | 29.2,25.91      | - |
| chr3 | 20218580 | 20218618 | CSAR_peak_ | 28.34,12.13     | - |
| chr3 | 20218709 | 20218790 | CSAR_peak_ | 28.34,9.77,2.1  | - |
| chr3 | 20218990 | 20219039 | CSAR_peak_ | 6.21            | - |
| chr3 | 20219065 | 20219329 | CSAR_peak_ | 17.87,6.03,7.1  | - |
| chr3 | 20219497 | 20219563 | CSAR_peak_ | 17.68,8.65      | - |
| chr3 | 20219704 | 20219791 | CSAR_peak_ | 6.81,12.13,2.1  | - |
| chr3 | 20219886 | 20219945 | CSAR_peak_ | 10.33,23.03     | - |
| chr3 | 20220047 | 20220111 | CSAR_peak_ | 20.05           | - |
| chr3 | 20223358 | 20223398 | CSAR_peak_ | 9.58            | - |
| chr3 | 20223516 | 20223603 | CSAR_peak_ | 11.03,11.45,1.1 | - |
| chr3 | 20224602 | 20224628 | CSAR_peak_ | 6.95            | - |
| chr3 | 20224732 | 20224792 | CSAR_peak_ | 9.58            | - |
| chr3 | 20230306 | 20230384 | CSAR_peak_ | 11.96,10.31,1.1 | - |
| chr3 | 20231487 | 20231559 | CSAR_peak_ | 18.85,6.45      | - |
| chr3 | 20231709 | 20231742 | CSAR_peak_ | 16.11,8.65      | - |
| chr3 | 20231814 | 20231886 | CSAR_peak_ | 9.58            | - |
| chr3 | 20231971 | 20232017 | CSAR_peak_ | 9.55            | - |
| chr3 | 20232346 | 20232426 | CSAR_peak_ | 7.27            | - |
| chr3 | 20256597 | 20256665 | CSAR_peak_ | 9.58            | - |
| chr3 | 20256847 | 20256908 | CSAR_peak_ | 6.21            | - |
| chr3 | 20269220 | 20269264 | CSAR_peak_ | 8.39            | - |
| chr3 | 20269312 | 20269352 | CSAR_peak_ | 6.57            | - |
| chr3 | 20270021 | 20270073 | CSAR_peak_ | 6.21            | - |
| chr3 | 20270174 | 20270221 | CSAR_peak_ | 8.39            | - |
| chr3 | 20271433 | 20271547 | CSAR_peak_ | 17.82,9.58      | - |
| chr3 | 20271621 | 20271726 | CSAR_peak_ | 7.27            | - |
| chr3 | 20271759 | 20271943 | CSAR_peak_ | 10.02,7.13,4.1  | - |
| chr3 | 20272029 | 20272065 | CSAR_peak_ | 9.77            | - |
| chr3 | 20312623 | 20312633 | CSAR_peak_ | 8.39            | - |
| chr3 | 20312754 | 20312890 | CSAR_peak_ | 6.81,9.58,19.1  | - |
| chr3 | 20312982 | 20313013 | CSAR_peak_ | 9.27            | - |
| chr3 | 20314953 | 20314986 | CSAR_peak_ | 6.21            | - |
| chr3 | 20326756 | 20326813 | CSAR_peak_ | 7.27            | - |
| chr3 | 20335271 | 20335326 | CSAR_peak_ | 13.48           | - |
| chr3 | 20335434 | 20335498 | CSAR_peak_ | 14.88           | - |
| chr3 | 20336197 | 20336280 | CSAR_peak_ | 6.21            | - |
| chr3 | 20336563 | 20336608 | CSAR_peak_ | 6.21            | - |
| chr3 | 20337027 | 20337138 | CSAR_peak_ | 8.39,19.98      | - |



|      |          |          |             |               |   |
|------|----------|----------|-------------|---------------|---|
| chr3 | 20337228 | 20337281 | CSAR_peak_  | 9.58,12.13    | - |
| chr3 | 20337439 | 20337488 | CSAR_peak_! | 7             | - |
| chr3 | 20337505 | 20337558 | CSAR_peak_! | 6.81          | - |
| chr3 | 20337659 | 20337729 | CSAR_peak_  | 20.21,11.32   | - |
| chr3 | 20337759 | 20337871 | CSAR_peak_  | 19.36,9.58    | - |
| chr3 | 20339553 | 20339889 | CSAR_peak_  | 20.43,18.73,1 | - |
| chr3 | 20339940 | 20340013 | CSAR_peak_  | 15.24,15.02   | - |
| chr3 | 20340019 | 20340101 | CSAR_peak_  | 8.3,7.4       | - |
| chr3 | 20340136 | 20340284 | CSAR_peak_  | 15.1,11.03,1  | - |
| chr3 | 20340337 | 20340347 | CSAR_peak_  | 9.77          | - |
| chr3 | 20340362 | 20340438 | CSAR_peak_  | 17.88         | - |
| chr3 | 20340445 | 20340485 | CSAR_peak_  | 6.21          | - |
| chr3 | 20340718 | 20340856 | CSAR_peak_  | 29.4,9.02     | - |
| chr3 | 20340876 | 20340909 | CSAR_peak_  | 6.85          | - |
| chr3 | 20369450 | 20369541 | CSAR_peak_  | 9.79          | - |
| chr3 | 20373773 | 20373824 | CSAR_peak_  | 14.88         | - |
| chr3 | 20373885 | 20373955 | CSAR_peak_  | 7.92,13.48    | - |
| chr3 | 20374180 | 20374265 | CSAR_peak_! | 10.83,16.11   | - |
| chr3 | 20375090 | 20375144 | CSAR_peak_  | 9.58          | - |
| chr3 | 20375148 | 20375229 | CSAR_peak_  | 14.88,6.57,1  | - |
| chr3 | 20375364 | 20375449 | CSAR_peak_  | 16.19         | - |
| chr3 | 20375969 | 20376012 | CSAR_peak_  | 9.58          | - |
| chr3 | 20376104 | 20376159 | CSAR_peak_  | 19.36         | - |
| chr3 | 20389220 | 20389292 | CSAR_peak_  | 19.98         | - |
| chr3 | 20389415 | 20389503 | CSAR_peak_  | 20.43,14.88   | - |
| chr3 | 20389755 | 20389788 | CSAR_peak_  | 8.65          | - |
| chr3 | 20390055 | 20390106 | CSAR_peak_  | 6.03          | - |
| chr3 | 20390267 | 20390369 | CSAR_peak_  | 12.13         | - |
| chr3 | 20390588 | 20390614 | CSAR_peak_  | 5.86          | - |
| chr3 | 20390816 | 20390829 | CSAR_peak_! | 8.2           | - |
| chr3 | 20390983 | 20391020 | CSAR_peak_! | 7.27          | - |
| chr3 | 20391031 | 20391096 | CSAR_peak_  | 12.13,6.03    | - |
| chr3 | 20391176 | 20391260 | CSAR_peak_  | 8.65          | - |
| chr3 | 20391335 | 20391390 | CSAR_peak_  | 7.27,9.77     | - |
| chr3 | 20391503 | 20391556 | CSAR_peak_  | 13.44,12.13   | - |
| chr3 | 20391923 | 20391965 | CSAR_peak_  | 7.27          | - |
| chr3 | 20393030 | 20393083 | CSAR_peak_  | 10.95         | - |
| chr3 | 20393204 | 20393278 | CSAR_peak_  | 29.2,9.48,7.7 | - |
| chr3 | 20393517 | 20393580 | CSAR_peak_  | 9.58          | - |
| chr3 | 20393789 | 20393807 | CSAR_peak_! | 8.14          | - |
| chr3 | 20398493 | 20398578 | CSAR_peak_  | 17.82         | - |
| chr3 | 20398764 | 20398825 | CSAR_peak_  | 40.66,14.88   | - |

|      |          |          |            |                |   |
|------|----------|----------|------------|----------------|---|
| chr3 | 20398913 | 20399021 | CSAR_peak_ | 23.03,17.35    | - |
| chr3 | 20399275 | 20399327 | CSAR_peak_ | 5.79,8.39      | - |
| chr3 | 20399336 | 20399386 | CSAR_peak_ | 9.58           | - |
| chr3 | 20399477 | 20399559 | CSAR_peak_ | 8.65           | - |
| chr3 | 20399657 | 20399706 | CSAR_peak_ | 17.82,5.86     | - |
| chr3 | 20400121 | 20400173 | CSAR_peak_ | 19.98,7.27     | - |
| chr3 | 20400786 | 20400822 | CSAR_peak_ | 7.27           | - |
| chr3 | 20402017 | 20402086 | CSAR_peak_ | 7.58,8.39      | - |
| chr3 | 20507668 | 20507732 | CSAR_peak_ | 6.21           | - |
| chr3 | 20511441 | 20511475 | CSAR_peak_ | 6.21           | - |
| chr3 | 20549565 | 20549618 | CSAR_peak_ | 7.27           | - |
| chr3 | 20549730 | 20550080 | CSAR_peak_ | 31.2,31.34     | - |
| chr3 | 20550084 | 20550163 | CSAR_peak_ | 16.54,10.96    | - |
| chr3 | 20550174 | 20550796 | CSAR_peak_ | 33.03,23.03,,- | - |
| chr3 | 20550852 | 20550896 | CSAR_peak_ | 7.26           | - |
| chr3 | 20550928 | 20550993 | CSAR_peak_ | 25.91,24.52    | - |
| chr3 | 20551273 | 20551309 | CSAR_peak_ | 8.65           | - |
| chr3 | 20551448 | 20551513 | CSAR_peak_ | 6.21,21.94     | - |
| chr3 | 20551533 | 20551756 | CSAR_peak_ | 27.94,7,28.2,- | - |
| chr3 | 20551795 | 20551864 | CSAR_peak_ | 21.35,11.07    | - |
| chr3 | 20551867 | 20551951 | CSAR_peak_ | 8.53,24.52     | - |
| chr3 | 20605051 | 20605150 | CSAR_peak_ | 5.86,8.2,12.7- | - |
| chr3 | 20624482 | 20624608 | CSAR_peak_ | 7,8.39,9.55    | - |
| chr3 | 20624625 | 20624687 | CSAR_peak_ | 6.81           | - |
| chr3 | 20624838 | 20624897 | CSAR_peak_ | 17.51          | - |
| chr3 | 20625002 | 20625064 | CSAR_peak_ | 8.39           | - |
| chr3 | 20625072 | 20625168 | CSAR_peak_ | 9.27,8.39      | - |
| chr3 | 20625553 | 20625630 | CSAR_peak_ | 16.33,7.58     | - |
| chr3 | 20625930 | 20626025 | CSAR_peak_ | 17.87,17.68    | - |
| chr3 | 20626124 | 20626151 | CSAR_peak_ | 7.92,12.17     | - |
| chr3 | 20626294 | 20626332 | CSAR_peak_ | 8.39           | - |
| chr3 | 20626532 | 20626610 | CSAR_peak_ | 9.77,7.27      | - |
| chr3 | 20626712 | 20626860 | CSAR_peak_ | 5.86,10.7,7.2- | - |
| chr3 | 20626973 | 20627131 | CSAR_peak_ | 14.88,8.39,7.- | - |
| chr3 | 20627549 | 20627599 | CSAR_peak_ | 12.17          | - |
| chr3 | 20627996 | 20628087 | CSAR_peak_ | 9.61,8.65      | - |
| chr3 | 20628181 | 20628211 | CSAR_peak_ | 12.17          | - |
| chr3 | 20628252 | 20628284 | CSAR_peak_ | 7.27,14.88     | - |
| chr3 | 20628364 | 20628482 | CSAR_peak_ | 12.5,15.68     | - |
| chr3 | 20628555 | 20628585 | CSAR_peak_ | 14.88,13.66    | - |
| chr3 | 20628930 | 20629005 | CSAR_peak_ | 10.62,16.54    | - |
| chr3 | 20722124 | 20722167 | CSAR_peak_ | 9.58           | - |

|      |          |          |            |               |   |
|------|----------|----------|------------|---------------|---|
| chr3 | 20722311 | 20722343 | CSAR_peak_ | 14.88         | - |
| chr3 | 20722547 | 20722591 | CSAR_peak_ | 10.31,6.1     | - |
| chr3 | 20722684 | 20722783 | CSAR_peak_ | 29.4,29.2     | - |
| chr3 | 20723195 | 20723230 | CSAR_peak_ | 9.58          | - |
| chr3 | 20723579 | 20723657 | CSAR_peak_ | 16.33,8.39    | - |
| chr3 | 20723842 | 20723969 | CSAR_peak_ | 18.73,8.39    | - |
| chr3 | 20723976 | 20724021 | CSAR_peak_ | 16.11         | - |
| chr3 | 20724154 | 20724242 | CSAR_peak_ | 12.13,9.13,8. | - |
| chr3 | 20724353 | 20724414 | CSAR_peak_ | 9.58          | - |
| chr3 | 20724649 | 20724688 | CSAR_peak_ | 8.39          | - |
| chr3 | 20724923 | 20724968 | CSAR_peak_ | 8.39,10.83    | - |
| chr3 | 20725165 | 20725220 | CSAR_peak_ | 12.13         | - |
| chr3 | 20725785 | 20725906 | CSAR_peak_ | 110,686.62,9- | - |
| chr3 | 20729504 | 20729630 | CSAR_peak_ | 71.08,133.88- | - |
| chr3 | 20743598 | 20743657 | CSAR_peak_ | 10.95         | - |
| chr3 | 20743932 | 20743971 | CSAR_peak_ | 7.27          | - |
| chr3 | 20744027 | 20744049 | CSAR_peak_ | 7.92          | - |
| chr3 | 20744232 | 20744256 | CSAR_peak_ | 12.13         | - |
| chr3 | 20760695 | 20760761 | CSAR_peak_ | 7.27,8.39     | - |
| chr3 | 20761511 | 20761566 | CSAR_peak_ | 6.85          | - |
| chr3 | 20761677 | 20761745 | CSAR_peak_ | 12.13         | - |
| chr3 | 20761750 | 20761803 | CSAR_peak_ | 13.48,6.21    | - |
| chr3 | 20762119 | 20762165 | CSAR_peak_ | 7.27          | - |
| chr3 | 20762596 | 20762609 | CSAR_peak_ | 7.27          | - |
| chr3 | 20792785 | 20792811 | CSAR_peak_ | 9.58          | - |
| chr3 | 20792905 | 20792966 | CSAR_peak_ | 16.33,12.13   | - |
| chr3 | 20793047 | 20793241 | CSAR_peak_ | 33.47,9.58,2- | - |
| chr3 | 20793288 | 20793391 | CSAR_peak_ | 7.92,12.13    | - |
| chr3 | 20793528 | 20793549 | CSAR_peak_ | 7.27          | - |
| chr3 | 20793649 | 20793673 | CSAR_peak_ | 7.27          | - |
| chr3 | 20794069 | 20794137 | CSAR_peak_ | 6.95          | - |
| chr3 | 20795058 | 20795114 | CSAR_peak_ | 5.86,5.86     | - |
| chr3 | 20795506 | 20795581 | CSAR_peak_ | 12.13         | - |
| chr3 | 20795650 | 20795709 | CSAR_peak_ | 12.31,7.27    | - |
| chr3 | 20796224 | 20796343 | CSAR_peak_ | 8.39,12.13    | - |
| chr3 | 20796469 | 20796514 | CSAR_peak_ | 6.03          | - |
| chr3 | 20796562 | 20796616 | CSAR_peak_ | 7.27          | - |
| chr3 | 20796624 | 20796647 | CSAR_peak_ | 6.21          | - |
| chr3 | 20796761 | 20796822 | CSAR_peak_ | 14.88,7.92    | - |
| chr3 | 20796884 | 20796948 | CSAR_peak_ | 17.82,7.27    | - |
| chr3 | 20798431 | 20798550 | CSAR_peak_ | 13.92,6.1     | - |
| chr3 | 20798703 | 20798792 | CSAR_peak_ | 10.83,19.36   | - |

|      |          |          |            |               |   |
|------|----------|----------|------------|---------------|---|
| chr3 | 20798869 | 20798956 | CSAR_peak_ | 9.77,13.66    | - |
| chr3 | 20798997 | 20799070 | CSAR_peak_ | 33.47,19.98   | - |
| chr3 | 20799225 | 20799267 | CSAR_peak_ | 7.27          | - |
| chr3 | 20799541 | 20799601 | CSAR_peak_ | 7.92,6.85     | - |
| chr3 | 20799652 | 20799689 | CSAR_peak_ | 6.21          | - |
| chr3 | 20799850 | 20799962 | CSAR_peak_ | 10.02         | - |
| chr3 | 20800451 | 20800512 | CSAR_peak_ | 24.52,33.47   | - |
| chr3 | 20800601 | 20800633 | CSAR_peak_ | 9.58,10.02    | - |
| chr3 | 20800672 | 20800718 | CSAR_peak_ | 10.02         | - |
| chr3 | 20807849 | 20807942 | CSAR_peak_ | 139.47,31.81  | - |
| chr3 | 20810227 | 20810295 | CSAR_peak_ | 7.27          | - |
| chr3 | 20810376 | 20810507 | CSAR_peak_ | 14.76,6.21    | - |
| chr3 | 20810516 | 20810657 | CSAR_peak_ | 12.35,17.51,  | - |
| chr3 | 20810866 | 20810990 | CSAR_peak_ | 17.82         | - |
| chr3 | 20811063 | 20811134 | CSAR_peak_ | 30.21,17.87   | - |
| chr3 | 20811153 | 20811189 | CSAR_peak_ | 6.03          | - |
| chr3 | 20811399 | 20811636 | CSAR_peak_ | 48.73,50.92   | - |
| chr3 | 20811677 | 20811749 | CSAR_peak_ | 15.96,14.63   | - |
| chr3 | 20811772 | 20811931 | CSAR_peak_ | 12.13,16.33   | - |
| chr3 | 20811936 | 20812117 | CSAR_peak_ | 18.35,19.98,  | - |
| chr3 | 20812149 | 20812160 | CSAR_peak_ | 8.39          | - |
| chr3 | 20812229 | 20812290 | CSAR_peak_ | 12.13         | - |
| chr3 | 20812301 | 20812390 | CSAR_peak_ | 16.33,7.27    | - |
| chr3 | 20812414 | 20812465 | CSAR_peak_ | 10.83         | - |
| chr3 | 20812536 | 20812693 | CSAR_peak_ | 15,12.17,8.3, | - |
| chr3 | 20812920 | 20813041 | CSAR_peak_ | 38.71,55.05   | - |
| chr3 | 20813175 | 20813210 | CSAR_peak_ | 7.27          | - |
| chr3 | 20813248 | 20813326 | CSAR_peak_ | 9.58,6.21     | - |
| chr3 | 20813594 | 20813643 | CSAR_peak_ | 7.27          | - |
| chr3 | 20813672 | 20813710 | CSAR_peak_ | 9.58          | - |
| chr3 | 20813712 | 20813808 | CSAR_peak_ | 46.27,39.37   | - |
| chr3 | 20814051 | 20814096 | CSAR_peak_ | 7.27          | - |
| chr3 | 20814175 | 20815144 | CSAR_peak_ | 39.63,17.57,  | - |
| chr3 | 20815172 | 20815270 | CSAR_peak_ | 9.31,25.07,1, | - |
| chr3 | 20815274 | 20815900 | CSAR_peak_ | 32.56,77.77,  | - |
| chr3 | 20815958 | 20816020 | CSAR_peak_ | 26.79,34.01   | - |
| chr3 | 20833613 | 20833678 | CSAR_peak_ | 14.88,12.13   | - |
| chr3 | 20833756 | 20833830 | CSAR_peak_ | 17.37         | - |
| chr3 | 20834028 | 20834135 | CSAR_peak_ | 6.95,16.08,6. | - |
| chr3 | 20834210 | 20834262 | CSAR_peak_ | 6.03          | - |
| chr3 | 20834551 | 20834610 | CSAR_peak_ | 6.21          | - |
| chr3 | 20836203 | 20836247 | CSAR_peak_ | 8.39          | - |

|      |          |          |            |               |   |
|------|----------|----------|------------|---------------|---|
| chr3 | 20836522 | 20836625 | CSAR_peak_ | 9.77,6.95     | - |
| chr3 | 20838794 | 20838837 | CSAR_peak_ | 6.21          | - |
| chr3 | 20846156 | 20846197 | CSAR_peak_ | 12.17         | - |
| chr3 | 20847383 | 20847432 | CSAR_peak_ | 8.39          | - |
| chr3 | 20847551 | 20847603 | CSAR_peak_ | 10.02         | - |
| chr3 | 20848250 | 20848324 | CSAR_peak_ | 12.31,6.85    | - |
| chr3 | 20863520 | 20863726 | CSAR_peak_ | 29.2,17.82    | - |
| chr3 | 20863855 | 20863904 | CSAR_peak_ | 6.21,6.02     | - |
| chr3 | 20916591 | 20916681 | CSAR_peak_ | 6.21          | - |
| chr3 | 20916842 | 20916929 | CSAR_peak_ | 17.82,14.88   | - |
| chr3 | 20917066 | 20917270 | CSAR_peak_ | 5.86,20.94,6. | - |
| chr3 | 20917407 | 20917461 | CSAR_peak_ | 7.27,12.13    | - |
| chr3 | 20917512 | 20917558 | CSAR_peak_ | 7             | - |
| chr3 | 20917628 | 20917675 | CSAR_peak_ | 13.44         | - |
| chr3 | 20917930 | 20918056 | CSAR_peak_ | 7.27,6.21     | - |
| chr3 | 20918161 | 20918237 | CSAR_peak_ | 9.58          | - |
| chr3 | 20918281 | 20918378 | CSAR_peak_ | 12.13,8.39    | - |
| chr3 | 20918540 | 20918742 | CSAR_peak_ | 7.27,19.36    | - |
| chr3 | 20918847 | 20919054 | CSAR_peak_ | 17.82,6.81,1. | - |
| chr3 | 20919099 | 20919255 | CSAR_peak_ | 12.13,20.94   | - |
| chr3 | 20920603 | 20920650 | CSAR_peak_ | 7.27          | - |
| chr3 | 20920733 | 20920774 | CSAR_peak_ | 6.21          | - |
| chr3 | 20920845 | 20920887 | CSAR_peak_ | 6.21          | - |
| chr3 | 20933630 | 20933696 | CSAR_peak_ | 8.39,9.58     | - |
| chr3 | 20933778 | 20933825 | CSAR_peak_ | 6.21          | - |
| chr3 | 20938025 | 20938127 | CSAR_peak_ | 12.13         | - |
| chr3 | 21015789 | 21015850 | CSAR_peak_ | 14.88         | - |
| chr3 | 21018749 | 21018785 | CSAR_peak_ | 6.21          | - |
| chr3 | 21031433 | 21031484 | CSAR_peak_ | 9.58          | - |
| chr3 | 21033517 | 21033565 | CSAR_peak_ | 6.21          | - |
| chr3 | 21033636 | 21033689 | CSAR_peak_ | 13.44         | - |
| chr3 | 21033848 | 21034021 | CSAR_peak_ | 12.13,37.42,. | - |
| chr3 | 21034062 | 21034300 | CSAR_peak_ | 24.52,10.83   | - |
| chr3 | 21034308 | 21034471 | CSAR_peak_ | 6.51,20.77,2. | - |
| chr3 | 21034703 | 21034819 | CSAR_peak_ | 40.66,24.52   | - |
| chr3 | 21034858 | 21034901 | CSAR_peak_ | 7.58,7.27     | - |
| chr3 | 21034977 | 21035216 | CSAR_peak_ | 10.18,12.17,. | - |
| chr3 | 21035232 | 21035442 | CSAR_peak_ | 25.07,14.88,. | - |
| chr3 | 21035567 | 21035646 | CSAR_peak_ | 13.48,10.7    | - |
| chr3 | 21035654 | 21035694 | CSAR_peak_ | 6.21          | - |
| chr3 | 21035751 | 21035806 | CSAR_peak_ | 7.27          | - |
| chr3 | 21035845 | 21035982 | CSAR_peak_ | 12.74,29.14,. | - |

|      |          |          |            |                |   |
|------|----------|----------|------------|----------------|---|
| chr3 | 21036278 | 21036343 | CSAR_peak_ | 13.48,9.58     | - |
| chr3 | 21041818 | 21042016 | CSAR_peak_ | 78.51,11.92,(  | - |
| chr3 | 21047009 | 21047059 | CSAR_peak_ | 7.27           | - |
| chr3 | 21047177 | 21047244 | CSAR_peak_ | 9.58           | - |
| chr3 | 21047544 | 21047601 | CSAR_peak_ | 7.27           | - |
| chr3 | 21048800 | 21048851 | CSAR_peak_ | 6.85,8.39      | - |
| chr3 | 21049151 | 21049237 | CSAR_peak_ | 7.92,7.27      | - |
| chr3 | 21049280 | 21049331 | CSAR_peak_ | 8.39           | - |
| chr3 | 21049349 | 21049464 | CSAR_peak_ | 21.94,18.65    | - |
| chr3 | 21049598 | 21049625 | CSAR_peak_ | 8.39           | - |
| chr3 | 21050698 | 21050804 | CSAR_peak_ | 11.14,23.95,(  | - |
| chr3 | 21051208 | 21051283 | CSAR_peak_ | 17.82,9.58     | - |
| chr3 | 21051372 | 21051431 | CSAR_peak_ | 10.83          | - |
| chr3 | 21051616 | 21051903 | CSAR_peak_ | 9.77,26.43,2(  | - |
| chr3 | 21051909 | 21052163 | CSAR_peak_ | 12.92,18.4,3(  | - |
| chr3 | 21069738 | 21069839 | CSAR_peak_ | 12.13,7.58     | - |
| chr3 | 21098571 | 21098662 | CSAR_peak_ | 14.76          | - |
| chr3 | 21099393 | 21099460 | CSAR_peak_ | 17.82          | - |
| chr3 | 21112621 | 21112670 | CSAR_peak_ | 9.58           | - |
| chr3 | 21196805 | 21196855 | CSAR_peak_ | 6.21           | - |
| chr3 | 21212083 | 21212219 | CSAR_peak_ | 7.27,7.27,7.2- | - |
| chr3 | 21212230 | 21212285 | CSAR_peak_ | 13.48          | - |
| chr3 | 21212415 | 21212462 | CSAR_peak_ | 7.27           | - |
| chr3 | 21212528 | 21212577 | CSAR_peak_ | 13.51,9.58     | - |
| chr3 | 21212669 | 21212684 | CSAR_peak_ | 6.12           | - |
| chr3 | 21212686 | 21212721 | CSAR_peak_ | 6.64           | - |
| chr3 | 21212771 | 21212811 | CSAR_peak_ | 6.21,10.95     | - |
| chr3 | 21212965 | 21213140 | CSAR_peak_ | 12.13,9.77,2(  | - |
| chr3 | 21213280 | 21213334 | CSAR_peak_ | 7.27           | - |
| chr3 | 21214052 | 21214122 | CSAR_peak_ | 7.92,8.92,10.- | - |
| chr3 | 21214166 | 21214250 | CSAR_peak_ | 10.31,14.88    | - |
| chr3 | 21214359 | 21214402 | CSAR_peak_ | 7.27           | - |
| chr3 | 21214434 | 21214516 | CSAR_peak_ | 8.65,6.21      | - |
| chr3 | 21214691 | 21214738 | CSAR_peak_ | 8.65           | - |
| chr3 | 21216205 | 21216274 | CSAR_peak_ | 12.31,14.88    | - |
| chr3 | 21243208 | 21243304 | CSAR_peak_ | 8.28,7.27      | - |
| chr3 | 21243454 | 21243541 | CSAR_peak_ | 9.58,9.03      | - |
| chr3 | 21243623 | 21243729 | CSAR_peak_ | 18.85,25.62    | - |
| chr3 | 21243821 | 21244046 | CSAR_peak_ | 11.07,19.36    | - |
| chr3 | 21244160 | 21244209 | CSAR_peak_ | 7.27,8.65,7.9- | - |
| chr3 | 21244218 | 21244313 | CSAR_peak_ | 8.39,20.35     | - |
| chr3 | 21244337 | 21244398 | CSAR_peak_ | 15.2,7.53      | - |

|      |          |          |            |                |   |
|------|----------|----------|------------|----------------|---|
| chr3 | 21244692 | 21244734 | CSAR_peak_ | 6.38           | - |
| chr3 | 21244922 | 21244999 | CSAR_peak_ | 19.36,6.21     | - |
| chr3 | 21245041 | 21245076 | CSAR_peak_ | 6.21           | - |
| chr3 | 21245125 | 21245183 | CSAR_peak_ | 14.88,9.58     | - |
| chr3 | 21245376 | 21245522 | CSAR_peak_ | 21.22,9.58,9.  | - |
| chr3 | 21245588 | 21245729 | CSAR_peak_ | 17.82,17.37,1. | - |
| chr3 | 21245803 | 21245814 | CSAR_peak_ | 8.39           | - |
| chr3 | 21246054 | 21246094 | CSAR_peak_ | 13.09,6.14     | - |
| chr3 | 21246245 | 21246336 | CSAR_peak_ | 13.6,14.12     | - |
| chr3 | 21246337 | 21246374 | CSAR_peak_ | 13.92,6.94     | - |
| chr3 | 21246554 | 21246692 | CSAR_peak_ | 20.94,14.93    | - |
| chr3 | 21246775 | 21246819 | CSAR_peak_ | 14.88          | - |
| chr3 | 21246824 | 21246844 | CSAR_peak_ | 8.39,14.76     | - |
| chr3 | 21246913 | 21246999 | CSAR_peak_ | 11.38,28.19    | - |
| chr3 | 21247416 | 21247496 | CSAR_peak_ | 17.37,15.03    | - |
| chr3 | 21247675 | 21247776 | CSAR_peak_ | 6.1,22.52,6.3  | - |
| chr3 | 21247866 | 21247940 | CSAR_peak_ | 13.72,12.61    | - |
| chr3 | 21247986 | 21248017 | CSAR_peak_ | 11.99          | - |
| chr3 | 21248093 | 21248177 | CSAR_peak_ | 18.89,12.12    | - |
| chr3 | 21248191 | 21248253 | CSAR_peak_ | 8.65           | - |
| chr3 | 21248398 | 21248458 | CSAR_peak_ | 12.17,10.31    | - |
| chr3 | 21248461 | 21248523 | CSAR_peak_ | 14.88,10.31    | - |
| chr3 | 21248663 | 21248825 | CSAR_peak_ | 17.4,10.7,9.5  | - |
| chr3 | 21248928 | 21249036 | CSAR_peak_ | 11.47,14.88    | - |
| chr3 | 21249070 | 21249165 | CSAR_peak_ | 11.63,16.25    | - |
| chr3 | 21249248 | 21249317 | CSAR_peak_ | 10.76,19.48    | - |
| chr3 | 21249491 | 21249636 | CSAR_peak_ | 14.88,14.88    | - |
| chr3 | 21250166 | 21250212 | CSAR_peak_ | 12.13          | - |
| chr3 | 21250280 | 21250369 | CSAR_peak_ | 17.82          | - |
| chr3 | 21250384 | 21250537 | CSAR_peak_ | 8.39,10.83     | - |
| chr3 | 21250820 | 21250846 | CSAR_peak_ | 7.27           | - |
| chr3 | 21250982 | 21251030 | CSAR_peak_ | 8.39           | - |
| chr3 | 21269518 | 21269567 | CSAR_peak_ | 8.39           | - |
| chr3 | 21269597 | 21269656 | CSAR_peak_ | 8.39           | - |
| chr3 | 21269733 | 21269785 | CSAR_peak_ | 6.21,17.82     | - |
| chr3 | 21269918 | 21270023 | CSAR_peak_ | 57.21,38.23,.  | - |
| chr3 | 21270247 | 21270295 | CSAR_peak_ | 17.51          | - |
| chr3 | 21270679 | 21270721 | CSAR_peak_ | 9.77           | - |
| chr3 | 21270808 | 21270836 | CSAR_peak_ | 6.57           | - |
| chr3 | 21270913 | 21270973 | CSAR_peak_ | 7.27           | - |
| chr3 | 21271360 | 21271406 | CSAR_peak_ | 6.03           | - |
| chr3 | 21271889 | 21271931 | CSAR_peak_ | 6.21           | - |

|      |          |          |            |                |   |
|------|----------|----------|------------|----------------|---|
| chr3 | 21273437 | 21273484 | CSAR_peak_ | 13.48          | - |
| chr3 | 21273862 | 21273934 | CSAR_peak_ | 9.97,6.44      | - |
| chr3 | 21274228 | 21274250 | CSAR_peak_ | 8.39           | - |
| chr3 | 21274360 | 21274401 | CSAR_peak_ | 14.88          | - |
| chr3 | 21274423 | 21274483 | CSAR_peak_ | 21.94,21.35    | - |
| chr3 | 21274618 | 21274670 | CSAR_peak_ | 17.82,13.44    | - |
| chr3 | 21274836 | 21274880 | CSAR_peak_ | 10.02,12.13    | - |
| chr3 | 21274959 | 21275033 | CSAR_peak_ | 11.38,12.5     | - |
| chr3 | 21275125 | 21275169 | CSAR_peak_ | 11.38          | - |
| chr3 | 21275338 | 21275393 | CSAR_peak_ | 12.17          | - |
| chr3 | 21275510 | 21275559 | CSAR_peak_ | 14.76          | - |
| chr3 | 21275589 | 21275668 | CSAR_peak_ | 12.38,25.08    | - |
| chr3 | 21275743 | 21275805 | CSAR_peak_ | 30.21,9.43     | - |
| chr3 | 21275894 | 21275958 | CSAR_peak_ | 24.21,7.47     | - |
| chr3 | 21288814 | 21288955 | CSAR_peak_ | 6.21,7.27,19.  | - |
| chr3 | 21288975 | 21289130 | CSAR_peak_ | 15.76,12.13    | - |
| chr3 | 21289209 | 21289477 | CSAR_peak_ | 55.05,13.85,   | - |
| chr3 | 21289502 | 21289528 | CSAR_peak_ | 17.51          | - |
| chr3 | 21289612 | 21289649 | CSAR_peak_ | 10.02,16.36    | - |
| chr3 | 21289667 | 21289697 | CSAR_peak_ | 8.39           | - |
| chr3 | 21289716 | 21289735 | CSAR_peak_ | 9.61           | - |
| chr3 | 21289761 | 21289894 | CSAR_peak_ | 40.72,14.96,   | - |
| chr3 | 21289929 | 21289974 | CSAR_peak_ | 11.99,14.93    | - |
| chr3 | 21290018 | 21290079 | CSAR_peak_ | 24.21,14.63    | - |
| chr3 | 21290086 | 21290140 | CSAR_peak_ | 5.86           | - |
| chr3 | 21290163 | 21290374 | CSAR_peak_ | 17.82,6.21,21. | - |
| chr3 | 21290403 | 21290554 | CSAR_peak_ | 43.17,36.76    | - |
| chr3 | 21290574 | 21290873 | CSAR_peak_ | 16.33,21.35,   | - |
| chr3 | 21290990 | 21291141 | CSAR_peak_ | 15.85,18.51,   | - |
| chr3 | 21291289 | 21291350 | CSAR_peak_ | 20.94,9.58     | - |
| chr3 | 21291397 | 21291748 | CSAR_peak_ | 8.2,25.91,18.  | - |
| chr3 | 21291773 | 21291894 | CSAR_peak_ | 47.75,25.91    | - |
| chr3 | 21291957 | 21292016 | CSAR_peak_ | 42.4,42.05     | - |
| chr3 | 21292032 | 21292186 | CSAR_peak_ | 11.38,44.69,   | - |
| chr3 | 21292236 | 21292281 | CSAR_peak_ | 7.78           | - |
| chr3 | 21292304 | 21292325 | CSAR_peak_ | 6.01           | - |
| chr3 | 21292341 | 21292404 | CSAR_peak_ | 7.43,7.31      | - |
| chr3 | 21292408 | 21292606 | CSAR_peak_ | 8.39,25.22,3.  | - |
| chr3 | 21292644 | 21292761 | CSAR_peak_ | 22.41,6.1,8.3  | - |
| chr3 | 21292930 | 21293020 | CSAR_peak_ | 50.09,40.66,   | - |
| chr3 | 21296639 | 21296752 | CSAR_peak_ | 21.35,24.52    | - |
| chr3 | 21296959 | 21297054 | CSAR_peak_ | 8.3,12.68      | - |



|      |          |          |             |                |
|------|----------|----------|-------------|----------------|
| chr3 | 21297148 | 21297674 | CSAR_peak_! | 8.28,42.64,5(- |
| chr3 | 21297744 | 21297807 | CSAR_peak_! | 20.43,7.73 -   |
| chr3 | 21297836 | 21297856 | CSAR_peak_! | 8.28,6.03 -    |
| chr3 | 21297937 | 21298094 | CSAR_peak_! | 22.69,20.18,(- |
| chr3 | 21298264 | 21298387 | CSAR_peak_! | 20.54,9.58 -   |
| chr3 | 21298456 | 21298501 | CSAR_peak_! | 14.88 -        |
| chr3 | 21298546 | 21298626 | CSAR_peak_! | 8.39,11.96 -   |
| chr3 | 21298824 | 21299001 | CSAR_peak_! | 24.52,19.21,(- |
| chr3 | 21299021 | 21299126 | CSAR_peak_! | 16.08,32.46 -  |
| chr3 | 21299150 | 21299243 | CSAR_peak_! | 11.63,23.03 -  |
| chr3 | 21299316 | 21299386 | CSAR_peak_! | 9.58,31.2 -    |
| chr3 | 21397421 | 21397619 | CSAR_peak_! | 7.88,113.76,(- |
| chr3 | 21399810 | 21399862 | CSAR_peak_! | 8.39 -         |
| chr3 | 21400200 | 21400266 | CSAR_peak_! | 6.21 -         |
| chr3 | 21405923 | 21405967 | CSAR_peak_! | 14.88 -        |
| chr3 | 21406008 | 21406051 | CSAR_peak_! | 9.58,12.13 -   |
| chr3 | 21406497 | 21406575 | CSAR_peak_! | 7.58,9.77 -    |
| chr3 | 21406592 | 21406691 | CSAR_peak_! | 8.95,7.27 -    |
| chr3 | 21407985 | 21408058 | CSAR_peak_! | 8.39,6.21 -    |
| chr3 | 21409007 | 21409058 | CSAR_peak_! | 7.27 -         |
| chr3 | 21410433 | 21410499 | CSAR_peak_! | 7.58,11.38 -   |
| chr3 | 21410594 | 21410704 | CSAR_peak_! | 12.13,7.27 -   |
| chr3 | 21428306 | 21428355 | CSAR_peak_! | 7.27 -         |
| chr3 | 21430043 | 21430171 | CSAR_peak_! | 7.27,6.21,9.5- |
| chr3 | 21431444 | 21431483 | CSAR_peak_! | 7.27 -         |
| chr3 | 21432215 | 21432332 | CSAR_peak_! | 7.27,14.88 -   |
| chr3 | 21432349 | 21432431 | CSAR_peak_! | 13.44 -        |
| chr3 | 21432504 | 21432674 | CSAR_peak_! | 7.27,5.86,7.2- |
| chr3 | 21432788 | 21432821 | CSAR_peak_! | 7.27 -         |
| chr3 | 21432827 | 21432889 | CSAR_peak_! | 21.94,12.13 -  |
| chr3 | 21447231 | 21447386 | CSAR_peak_! | 9.32,19.21,1(- |
| chr3 | 21447408 | 21447714 | CSAR_peak_! | 13.51,6.87,1(- |
| chr3 | 21447728 | 21447824 | CSAR_peak_! | 6.81,10.83,1(- |
| chr3 | 21447926 | 21447984 | CSAR_peak_! | 8.39,14.88 -   |
| chr3 | 21448009 | 21448057 | CSAR_peak_! | 10.83,14.88 -  |
| chr3 | 21448089 | 21448253 | CSAR_peak_! | 12.13,10.83,(- |
| chr3 | 21448360 | 21448457 | CSAR_peak_! | 7.58 -         |
| chr3 | 21448588 | 21448644 | CSAR_peak_! | 9.77,21.94 -   |
| chr3 | 21468403 | 21468579 | CSAR_peak_! | 12.13,6.81,7.- |
| chr3 | 21468631 | 21468714 | CSAR_peak_! | 14.88 -        |
| chr3 | 21521994 | 21522056 | CSAR_peak_! | 8.39 -         |
| chr3 | 21522221 | 21522281 | CSAR_peak_! | 17.82 -        |

|      |          |          |            |               |   |
|------|----------|----------|------------|---------------|---|
| chr3 | 21522566 | 21522647 | CSAR_peak_ | 6.21          | - |
| chr3 | 21529950 | 21530006 | CSAR_peak_ | 9.58          | - |
| chr3 | 21530842 | 21530909 | CSAR_peak_ | 12.17         | - |
| chr3 | 21531404 | 21531468 | CSAR_peak_ | 13.29         | - |
| chr3 | 21542594 | 21542733 | CSAR_peak_ | 9.58,8.39     | - |
| chr3 | 21542856 | 21542916 | CSAR_peak_ | 7.27          | - |
| chr3 | 21543005 | 21543061 | CSAR_peak_ | 6.21,7.27     | - |
| chr3 | 21543353 | 21543411 | CSAR_peak_ | 8.13          | - |
| chr3 | 21543780 | 21543861 | CSAR_peak_ | 10.83         | - |
| chr3 | 21564773 | 21564823 | CSAR_peak_ | 10.83         | - |
| chr3 | 21565417 | 21565490 | CSAR_peak_ | 9.58          | - |
| chr3 | 21565585 | 21565645 | CSAR_peak_ | 9.58          | - |
| chr3 | 21634995 | 21635071 | CSAR_peak_ | 14.88,33.03   | - |
| chr3 | 21635343 | 21635377 | CSAR_peak_ | 6.21          | - |
| chr3 | 21635727 | 21635774 | CSAR_peak_ | 17.82         | - |
| chr3 | 21635830 | 21635887 | CSAR_peak_ | 20.94,7.58    | - |
| chr3 | 21636965 | 21636999 | CSAR_peak_ | 12.13         | - |
| chr3 | 21637270 | 21637329 | CSAR_peak_ | 7.27,10.95    | - |
| chr3 | 21638229 | 21638297 | CSAR_peak_ | 10.83         | - |
| chr3 | 21638510 | 21638551 | CSAR_peak_ | 6.21          | - |
| chr3 | 21638700 | 21638757 | CSAR_peak_ | 7.27          | - |
| chr3 | 21638918 | 21638956 | CSAR_peak_ | 7.27          | - |
| chr3 | 21663126 | 21663203 | CSAR_peak_ | 14.88         | - |
| chr3 | 21668856 | 21668886 | CSAR_peak_ | 6.21          | - |
| chr3 | 21669223 | 21669265 | CSAR_peak_ | 7.27          | - |
| chr3 | 21669747 | 21669813 | CSAR_peak_ | 6.21          | - |
| chr3 | 21670862 | 21670935 | CSAR_peak_ | 8.39          | - |
| chr3 | 21685006 | 21685056 | CSAR_peak_ | 7.27          | - |
| chr3 | 21687018 | 21687072 | CSAR_peak_ | 7.27          | - |
| chr3 | 21687206 | 21687234 | CSAR_peak_ | 7.27          | - |
| chr3 | 21687335 | 21687408 | CSAR_peak_ | 11.28,6.95    | - |
| chr3 | 21687486 | 21687527 | CSAR_peak_ | 7.27          | - |
| chr3 | 21687616 | 21687686 | CSAR_peak_ | 9.58          | - |
| chr3 | 21687730 | 21687787 | CSAR_peak_ | 7.34,9.58     | - |
| chr3 | 21687966 | 21687993 | CSAR_peak_ | 14.88,6.03    | - |
| chr3 | 21688340 | 21688388 | CSAR_peak_ | 7.92,7.27     | - |
| chr3 | 21688773 | 21688823 | CSAR_peak_ | 12.13         | - |
| chr3 | 21689964 | 21690012 | CSAR_peak_ | 14.88,10.31   | - |
| chr3 | 21690253 | 21690268 | CSAR_peak_ | 16.11         | - |
| chr3 | 21690445 | 21690532 | CSAR_peak_ | 9.48,7.27,7.2 | - |
| chr3 | 21691371 | 21691425 | CSAR_peak_ | 9.77,8.39     | - |
| chr3 | 21692662 | 21692721 | CSAR_peak_ | 13.48,6.03    | - |

|      |          |          |            |                |   |
|------|----------|----------|------------|----------------|---|
| chr3 | 21693172 | 21693221 | CSAR_peak_ | 12.13          | - |
| chr3 | 21693550 | 21693601 | CSAR_peak_ | 6.03,7.73      | - |
| chr3 | 21718581 | 21718625 | CSAR_peak_ | 7.27           | - |
| chr3 | 21718751 | 21718790 | CSAR_peak_ | 7.27           | - |
| chr3 | 21718954 | 21718990 | CSAR_peak_ | 9.58           | - |
| chr3 | 21719192 | 21719300 | CSAR_peak_ | 13.48,9.77     | - |
| chr3 | 21724635 | 21724667 | CSAR_peak_ | 7.27           | - |
| chr3 | 21724675 | 21724734 | CSAR_peak_ | 17.37,8.39     | - |
| chr3 | 21724795 | 21724852 | CSAR_peak_ | 7.27           | - |
| chr3 | 21725032 | 21725096 | CSAR_peak_ | 14.88          | - |
| chr3 | 21725217 | 21725262 | CSAR_peak_ | 9.58           | - |
| chr3 | 21725418 | 21725568 | CSAR_peak_ | 7.92,7.73      | - |
| chr3 | 21725680 | 21725749 | CSAR_peak_ | 6.21           | - |
| chr3 | 21726907 | 21726974 | CSAR_peak_ | 7.58           | - |
| chr3 | 21727205 | 21727256 | CSAR_peak_ | 7.27           | - |
| chr3 | 21742376 | 21742515 | CSAR_peak_ | 13.48,12.13    | - |
| chr3 | 21742607 | 21742756 | CSAR_peak_ | 38.71,21.22,-  | - |
| chr3 | 21742832 | 21742954 | CSAR_peak_ | 14.88,9.58     | - |
| chr3 | 21743025 | 21743051 | CSAR_peak_ | 7.26           | - |
| chr3 | 21743066 | 21743133 | CSAR_peak_ | 9.77           | - |
| chr3 | 21743329 | 21743424 | CSAR_peak_ | 17.37,9.58     | - |
| chr3 | 21743498 | 21743597 | CSAR_peak_ | 8.09,18.65     | - |
| chr3 | 21743619 | 21743703 | CSAR_peak_ | 14.88          | - |
| chr3 | 21744131 | 21744215 | CSAR_peak_ | 8.09           | - |
| chr3 | 21744249 | 21744298 | CSAR_peak_ | 9.41           | - |
| chr3 | 21744445 | 21744508 | CSAR_peak_ | 14.88,10.83    | - |
| chr3 | 21744595 | 21744660 | CSAR_peak_ | 6.21           | - |
| chr3 | 21744995 | 21745167 | CSAR_peak_ | 9.41,12.31,6.- | - |
| chr3 | 21745379 | 21745440 | CSAR_peak_ | 10.02,18.65    | - |
| chr3 | 21745735 | 21745776 | CSAR_peak_ | 6.03           | - |
| chr3 | 21745856 | 21745897 | CSAR_peak_ | 8.92           | - |
| chr3 | 21745945 | 21746063 | CSAR_peak_ | 9.58,18.85,7.- | - |
| chr3 | 21796165 | 21796219 | CSAR_peak_ | 7.27,6.21      | - |
| chr3 | 21796441 | 21796453 | CSAR_peak_ | 7.27           | - |
| chr3 | 21796560 | 21796607 | CSAR_peak_ | 6.03           | - |
| chr3 | 21796665 | 21796746 | CSAR_peak_ | 9.77           | - |
| chr3 | 21796807 | 21796891 | CSAR_peak_ | 12.13,6.21     | - |
| chr3 | 21797586 | 21797783 | CSAR_peak_ | 14.88,17.82,-  | - |
| chr3 | 21797936 | 21797987 | CSAR_peak_ | 7.27           | - |
| chr3 | 21810927 | 21810973 | CSAR_peak_ | 7.27           | - |
| chr3 | 21811005 | 21811137 | CSAR_peak_ | 7.34,6.03,8.1- | - |
| chr3 | 21811225 | 21811352 | CSAR_peak_ | 7.27,9.58,13.- | - |

|      |          |          |            |               |   |
|------|----------|----------|------------|---------------|---|
| chr3 | 21811460 | 21811505 | CSAR_peak_ | 15,5.86       | - |
| chr3 | 21811684 | 21811713 | CSAR_peak_ | 8.39          | - |
| chr3 | 21812090 | 21812137 | CSAR_peak_ | 5.86          | - |
| chr3 | 21812194 | 21812244 | CSAR_peak_ | 10.95         | - |
| chr3 | 21812315 | 21812374 | CSAR_peak_ | 7.27,12.13    | - |
| chr3 | 21812506 | 21812590 | CSAR_peak_ | 9.03          | - |
| chr3 | 21812766 | 21812806 | CSAR_peak_ | 12.17         | - |
| chr3 | 21812985 | 21813030 | CSAR_peak_ | 7.27          | - |
| chr3 | 21813693 | 21813809 | CSAR_peak_ | 7.58,7.27,7.2 | - |
| chr3 | 21814203 | 21814345 | CSAR_peak_ | 14.88         | - |
| chr3 | 21814643 | 21814699 | CSAR_peak_ | 9.58          | - |
| chr3 | 21815425 | 21815519 | CSAR_peak_ | 9.58,7.27     | - |
| chr3 | 21815569 | 21815609 | CSAR_peak_ | 9.58          | - |
| chr3 | 21815895 | 21815932 | CSAR_peak_ | 6.21          | - |
| chr3 | 21817333 | 21817369 | CSAR_peak_ | 7.27          | - |
| chr3 | 21817405 | 21817460 | CSAR_peak_ | 7.27,6.21     | - |
| chr3 | 21819696 | 21819746 | CSAR_peak_ | 7.27          | - |
| chr3 | 21820900 | 21820969 | CSAR_peak_ | 14.88         | - |
| chr3 | 21821925 | 21822056 | CSAR_peak_ | 6.81,12.17,1  | - |
| chr3 | 21822189 | 21822245 | CSAR_peak_ | 7.27          | - |
| chr3 | 21823663 | 21823705 | CSAR_peak_ | 5.86          | - |
| chr3 | 21823709 | 21823815 | CSAR_peak_ | 16.33,13.48   | - |
| chr3 | 21824983 | 21825061 | CSAR_peak_ | 12.17         | - |
| chr3 | 21825503 | 21825657 | CSAR_peak_ | 24.21,7.58    | - |
| chr3 | 21825671 | 21825724 | CSAR_peak_ | 6.57          | - |
| chr3 | 21825726 | 21825762 | CSAR_peak_ | 25.91         | - |
| chr3 | 21825828 | 21825864 | CSAR_peak_ | 17.82         | - |
| chr3 | 21825898 | 21825941 | CSAR_peak_ | 7.26          | - |
| chr3 | 21825957 | 21826046 | CSAR_peak_ | 7.94,22.52    | - |
| chr3 | 21826070 | 21826116 | CSAR_peak_ | 7.78,12.54    | - |
| chr3 | 21826197 | 21826261 | CSAR_peak_ | 25.18,16.34   | - |
| chr3 | 21826383 | 21826471 | CSAR_peak_ | 14.61         | - |
| chr3 | 21826563 | 21826694 | CSAR_peak_ | 27.83,8.65    | - |
| chr3 | 21826771 | 21826884 | CSAR_peak_ | 8.39,23.95    | - |
| chr3 | 21826942 | 21827048 | CSAR_peak_ | 18.1,13.85,6  | - |
| chr3 | 21827134 | 21827251 | CSAR_peak_ | 22.73,10.94,  | - |
| chr3 | 21827494 | 21827608 | CSAR_peak_ | 17.4,20.94    | - |
| chr3 | 21827623 | 21827671 | CSAR_peak_ | 12.17,8.39    | - |
| chr3 | 21827905 | 21827959 | CSAR_peak_ | 9.58          | - |
| chr3 | 21827987 | 21828042 | CSAR_peak_ | 10.95,9.58    | - |
| chr3 | 21828134 | 21828213 | CSAR_peak_ | 20.94,6.21    | - |
| chr3 | 21828217 | 21828326 | CSAR_peak_ | 14.52,18.97   | - |

|      |          |          |             |                |
|------|----------|----------|-------------|----------------|
| chr3 | 21828382 | 21828537 | CSAR_peak_  | 16.73,17.3,6.- |
| chr3 | 21828614 | 21828668 | CSAR_peak_! | 6.52 -         |
| chr3 | 21828683 | 21828737 | CSAR_peak_  | 13.48,7.27 -   |
| chr3 | 21828830 | 21828900 | CSAR_peak_  | 23.42,7.31 -   |
| chr3 | 21828977 | 21829061 | CSAR_peak_  | 18.85,35.52 -  |
| chr3 | 21829094 | 21829263 | CSAR_peak_  | 13.51,13.48 -  |
| chr3 | 21829293 | 21829335 | CSAR_peak_  | 7.26 -         |
| chr3 | 21829595 | 21829741 | CSAR_peak_  | 18.65,22.06,(  |
| chr3 | 21829825 | 21829910 | CSAR_peak_  | 9.58,18.73,1(- |
| chr3 | 21909888 | 21909971 | CSAR_peak_  | 10.83 -        |
| chr3 | 21910517 | 21910551 | CSAR_peak_  | 7.27 -         |
| chr3 | 21922185 | 21922255 | CSAR_peak_  | 19.36 -        |
| chr3 | 21922321 | 21922416 | CSAR_peak_  | 7,12.17,15.9 - |
| chr3 | 21922511 | 21922562 | CSAR_peak_  | 13.48,6.03 -   |
| chr3 | 21923247 | 21923255 | CSAR_peak_  | 7.92 -         |
| chr3 | 21923994 | 21924059 | CSAR_peak_  | 9.58,12.13 -   |
| chr3 | 21924914 | 21924976 | CSAR_peak_  | 7.27,10.83 -   |
| chr3 | 21925546 | 21925613 | CSAR_peak_  | 9.58 -         |
| chr3 | 21927506 | 21927555 | CSAR_peak_  | 7.34 -         |
| chr3 | 21927637 | 21927686 | CSAR_peak_  | 8.39 -         |
| chr3 | 21928043 | 21928129 | CSAR_peak_  | 24.21 -        |
| chr3 | 21935994 | 21936006 | CSAR_peak_  | 7.27 -         |
| chr3 | 21936149 | 21936178 | CSAR_peak_  | 5.86 -         |
| chr3 | 21938916 | 21939004 | CSAR_peak_  | 9.58,6.81 -    |
| chr3 | 21939475 | 21939515 | CSAR_peak_  | 12.13 -        |
| chr3 | 21939658 | 21939689 | CSAR_peak_  | 19.36 -        |
| chr3 | 21939963 | 21940030 | CSAR_peak_  | 15.2,6.57,19.- |
| chr3 | 21996328 | 21996413 | CSAR_peak_  | 6.57,9.77 -    |
| chr3 | 22035224 | 22035270 | CSAR_peak_  | 13.51,22.56 -  |
| chr3 | 22035422 | 22035516 | CSAR_peak_  | 14.76,19.36 -  |
| chr3 | 22035918 | 22036011 | CSAR_peak_  | 9.61,28.34 -   |
| chr3 | 22036260 | 22036360 | CSAR_peak_  | 12.13,5.86,1(- |
| chr3 | 22036448 | 22036463 | CSAR_peak_  | 6.31 -         |
| chr3 | 22036464 | 22036478 | CSAR_peak_  | 7.26 -         |
| chr3 | 22036750 | 22036808 | CSAR_peak_  | 6.21 -         |
| chr3 | 22036836 | 22036890 | CSAR_peak_  | 7.68 -         |
| chr3 | 22037040 | 22037073 | CSAR_peak_  | 9.58 -         |
| chr3 | 22037195 | 22037301 | CSAR_peak_  | 20.94,8.65,1(- |
| chr3 | 22038332 | 22038382 | CSAR_peak_  | 7.92 -         |
| chr3 | 22054751 | 22054884 | CSAR_peak_  | 52.59,21.45,(- |
| chr3 | 22071395 | 22071448 | CSAR_peak_  | 6.21 -         |
| chr3 | 22073014 | 22073090 | CSAR_peak_  | 9.58,11.14 -   |

|      |          |          |            |                |   |
|------|----------|----------|------------|----------------|---|
| chr3 | 22073423 | 22073503 | CSAR_peak_ | 12.17,9.58     | - |
| chr3 | 22073602 | 22073666 | CSAR_peak_ | 9.77,6.21      | - |
| chr3 | 22074408 | 22074445 | CSAR_peak_ | 8.39           | - |
| chr3 | 22074719 | 22074767 | CSAR_peak_ | 9.58           | - |
| chr3 | 22074992 | 22075060 | CSAR_peak_ | 8.28,7.27      | - |
| chr3 | 22079497 | 22079560 | CSAR_peak_ | 14.88,8.39     | - |
| chr3 | 22079985 | 22080056 | CSAR_peak_ | 17.82,16.33,(  | - |
| chr3 | 22081544 | 22081591 | CSAR_peak_ | 7.27           | - |
| chr3 | 22082157 | 22082220 | CSAR_peak_ | 6.21,9.58      | - |
| chr3 | 22082390 | 22082497 | CSAR_peak_ | 12.13,19.36    | - |
| chr3 | 22082516 | 22082574 | CSAR_peak_ | 7.27,5.86      | - |
| chr3 | 22084973 | 22085050 | CSAR_peak_ | 6.21           | - |
| chr3 | 22094638 | 22094725 | CSAR_peak_ | 9.58           | - |
| chr3 | 22095080 | 22095147 | CSAR_peak_ | 7.34           | - |
| chr3 | 22098684 | 22098756 | CSAR_peak_ | 9.58,6.21      | - |
| chr3 | 22099063 | 22099111 | CSAR_peak_ | 6.57           | - |
| chr3 | 22099960 | 22100052 | CSAR_peak_ | 6.81           | - |
| chr3 | 22100540 | 22100640 | CSAR_peak_ | 13.48          | - |
| chr3 | 22101735 | 22101788 | CSAR_peak_ | 9.58           | - |
| chr3 | 22117460 | 22117516 | CSAR_peak_ | 19.36,7.58     | - |
| chr3 | 22145812 | 22145864 | CSAR_peak_ | 8.39           | - |
| chr3 | 22145980 | 22146034 | CSAR_peak_ | 13.48          | - |
| chr3 | 22146137 | 22146176 | CSAR_peak_ | 9.58           | - |
| chr3 | 22146557 | 22146616 | CSAR_peak_ | 6.21,11.96     | - |
| chr3 | 22156126 | 22156180 | CSAR_peak_ | 12.13,10.02    | - |
| chr3 | 22156297 | 22156357 | CSAR_peak_ | 7.27           | - |
| chr3 | 22156439 | 22156469 | CSAR_peak_ | 7.47           | - |
| chr3 | 22156980 | 22157017 | CSAR_peak_ | 9.58           | - |
| chr3 | 22157165 | 22157257 | CSAR_peak_ | 6.1,6.21,16.1- | - |
| chr3 | 22157354 | 22157410 | CSAR_peak_ | 7.27,7.58      | - |
| chr3 | 22157413 | 22157500 | CSAR_peak_ | 19.98          | - |
| chr3 | 22157578 | 22157621 | CSAR_peak_ | 13.48,10.02    | - |
| chr3 | 22157626 | 22157687 | CSAR_peak_ | 8.14,9.58      | - |
| chr3 | 22158141 | 22158150 | CSAR_peak_ | 8.2            | - |
| chr3 | 22158382 | 22158435 | CSAR_peak_ | 11.14,18.95    | - |
| chr3 | 22158517 | 22158561 | CSAR_peak_ | 6.03           | - |
| chr3 | 22166384 | 22166435 | CSAR_peak_ | 6.21,8.39      | - |
| chr3 | 22167005 | 22167049 | CSAR_peak_ | 7.27           | - |
| chr3 | 22167146 | 22167178 | CSAR_peak_ | 13.48          | - |
| chr3 | 22167242 | 22167289 | CSAR_peak_ | 19.36,9.58     | - |
| chr3 | 22168287 | 22168337 | CSAR_peak_ | 6.21           | - |
| chr3 | 22169301 | 22169399 | CSAR_peak_ | 17.82,6.95     | - |

|      |          |          |            |              |   |
|------|----------|----------|------------|--------------|---|
| chr3 | 22243839 | 22243883 | CSAR_peak_ | 7.27         | - |
| chr3 | 22244651 | 22244756 | CSAR_peak_ | 7.27         | - |
| chr3 | 22245499 | 22245554 | CSAR_peak_ | 9.58,8.39    | - |
| chr3 | 22245659 | 22245733 | CSAR_peak_ | 7.27,10.83   | - |
| chr3 | 22245876 | 22245914 | CSAR_peak_ | 7.27         | - |
| chr3 | 22245931 | 22246072 | CSAR_peak_ | 17.82,12.13, | - |
| chr3 | 22246256 | 22246311 | CSAR_peak_ | 9.58,8.39    | - |
| chr3 | 22246656 | 22246704 | CSAR_peak_ | 9.58         | - |
| chr3 | 22246973 | 22247033 | CSAR_peak_ | 12.17,7.58   | - |
| chr3 | 22247157 | 22247169 | CSAR_peak_ | 7.27         | - |
| chr3 | 22247568 | 22247644 | CSAR_peak_ | 10.83        | - |
| chr3 | 22270750 | 22270802 | CSAR_peak_ | 9.77         | - |
| chr3 | 22270807 | 22270863 | CSAR_peak_ | 7.27,8.52    | - |
| chr3 | 22271019 | 22271090 | CSAR_peak_ | 9.79,17.4    | - |
| chr3 | 22271267 | 22271356 | CSAR_peak_ | 12.13        | - |
| chr3 | 22271648 | 22271672 | CSAR_peak_ | 5.86         | - |
| chr3 | 22289817 | 22289872 | CSAR_peak_ | 8.39         | - |
| chr3 | 22290981 | 22291046 | CSAR_peak_ | 7.34         | - |
| chr3 | 22291759 | 22291831 | CSAR_peak_ | 7.27,6.03    | - |
| chr3 | 22292164 | 22292218 | CSAR_peak_ | 8.39         | - |
| chr3 | 22292382 | 22292487 | CSAR_peak_ | 12.13,7.27   | - |
| chr3 | 22292784 | 22292849 | CSAR_peak_ | 9.58         | - |
| chr3 | 22293443 | 22293500 | CSAR_peak_ | 16.11,8.39   | - |
| chr3 | 22293815 | 22293866 | CSAR_peak_ | 7.27         | - |
| chr3 | 22293867 | 22293915 | CSAR_peak_ | 6.21         | - |
| chr3 | 22294150 | 22294200 | CSAR_peak_ | 16.33,9.58   | - |
| chr3 | 22307487 | 22307539 | CSAR_peak_ | 7.27,7.27    | - |
| chr3 | 22308129 | 22308190 | CSAR_peak_ | 12.13        | - |
| chr3 | 22309086 | 22309144 | CSAR_peak_ | 14.88        | - |
| chr3 | 22310496 | 22310538 | CSAR_peak_ | 7.27         | - |
| chr3 | 22316055 | 22316122 | CSAR_peak_ | 8.39,6.21    | - |
| chr3 | 22357187 | 22357244 | CSAR_peak_ | 7.27         | - |
| chr3 | 22357342 | 22357393 | CSAR_peak_ | 8.95         | - |
| chr3 | 22357468 | 22357520 | CSAR_peak_ | 7.27         | - |
| chr3 | 22357664 | 22357705 | CSAR_peak_ | 8.39         | - |
| chr3 | 22357708 | 22357763 | CSAR_peak_ | 7.34         | - |
| chr3 | 22357991 | 22358054 | CSAR_peak_ | 7.27         | - |
| chr3 | 22358725 | 22358762 | CSAR_peak_ | 12.17,8.13   | - |
| chr3 | 22359446 | 22359488 | CSAR_peak_ | 7.27,6.21    | - |
| chr3 | 22359937 | 22360003 | CSAR_peak_ | 25.1         | - |
| chr3 | 22361669 | 22361778 | CSAR_peak_ | 17.37        | - |
| chr3 | 22361920 | 22361982 | CSAR_peak_ | 7.92         | - |

|      |          |          |            |                   |   |
|------|----------|----------|------------|-------------------|---|
| chr3 | 22460374 | 22460422 | CSAR_peak_ | 10.83             | - |
| chr3 | 22460539 | 22460559 | CSAR_peak_ | 6.21              | - |
| chr3 | 22460634 | 22460683 | CSAR_peak_ | 13.48,5.86,14.8   | - |
| chr3 | 22460786 | 22460830 | CSAR_peak_ | 6.21              | - |
| chr3 | 22460929 | 22460949 | CSAR_peak_ | 6.21              | - |
| chr3 | 22461634 | 22461729 | CSAR_peak_ | 10.95,7.58        | - |
| chr3 | 22473568 | 22473611 | CSAR_peak_ | 6.21              | - |
| chr3 | 22565492 | 22565560 | CSAR_peak_ | 8.39              | - |
| chr3 | 22571288 | 22571418 | CSAR_peak_ | 7.27,10.95,7.27   | - |
| chr3 | 22571492 | 22571564 | CSAR_peak_ | 7.73              | - |
| chr3 | 22571705 | 22571752 | CSAR_peak_ | 6.21              | - |
| chr3 | 22572206 | 22572303 | CSAR_peak_ | 9.77              | - |
| chr3 | 22572437 | 22572508 | CSAR_peak_ | 12.31,7.58        | - |
| chr3 | 22572572 | 22572649 | CSAR_peak_ | 6.21              | - |
| chr3 | 22572785 | 22572946 | CSAR_peak_ | 17.82,7.27,7.27   | - |
| chr3 | 22573899 | 22573929 | CSAR_peak_ | 7.27              | - |
| chr3 | 22574073 | 22574193 | CSAR_peak_ | 9.77,6.45,17.82   | - |
| chr3 | 22574442 | 22574492 | CSAR_peak_ | 11.96,17.82       | - |
| chr3 | 22574587 | 22574643 | CSAR_peak_ | 13.48,10.02,13.48 | - |
| chr3 | 22574667 | 22574793 | CSAR_peak_ | 25.91,8.14,9.77   | - |
| chr3 | 22574911 | 22574955 | CSAR_peak_ | 6.1,16.11         | - |
| chr3 | 22605025 | 22605192 | CSAR_peak_ | 19.98,24.21       | - |
| chr3 | 22605240 | 22605337 | CSAR_peak_ | 12.13,9.72        | - |
| chr3 | 22605406 | 22605513 | CSAR_peak_ | 31.8,44.85        | - |
| chr3 | 22605562 | 22605690 | CSAR_peak_ | 9.48,9.41,15.57   | - |
| chr3 | 22605742 | 22605886 | CSAR_peak_ | 13.6,10.18,7.27   | - |
| chr3 | 22605968 | 22606022 | CSAR_peak_ | 9.58,12.74        | - |
| chr3 | 22606062 | 22606112 | CSAR_peak_ | 8.39              | - |
| chr3 | 22606122 | 22606223 | CSAR_peak_ | 19.98,14.88       | - |
| chr3 | 22606266 | 22606324 | CSAR_peak_ | 9.58              | - |
| chr3 | 22606513 | 22606583 | CSAR_peak_ | 27.64,10.02       | - |
| chr3 | 22650887 | 22650999 | CSAR_peak_ | 18.73,16.33       | - |
| chr3 | 22651012 | 22651089 | CSAR_peak_ | 7.27              | - |
| chr3 | 22651195 | 22651249 | CSAR_peak_ | 6.21,13.48        | - |
| chr3 | 22651298 | 22651360 | CSAR_peak_ | 13.85,7.27        | - |
| chr3 | 22656306 | 22656308 | CSAR_peak_ | 8.28              | - |
| chr3 | 22656395 | 22656607 | CSAR_peak_ | 81.86,15.57,15.57 | - |
| chr3 | 22675093 | 22675161 | CSAR_peak_ | 16.11,10.31       | - |
| chr3 | 22675361 | 22676181 | CSAR_peak_ | 12.13,7.89,14.8   | - |
| chr3 | 22676187 | 22676732 | CSAR_peak_ | 35.24,34.26,35.24 | - |
| chr3 | 22690407 | 22690462 | CSAR_peak_ | 9.58              | - |
| chr3 | 22690966 | 22691025 | CSAR_peak_ | 8.39              | - |



|      |          |          |            |               |   |
|------|----------|----------|------------|---------------|---|
| chr3 | 22722944 | 22722985 | CSAR_peak_ | 7.58          | - |
| chr3 | 22723162 | 22723284 | CSAR_peak_ | 17.37,33.03   | - |
| chr3 | 22723493 | 22723549 | CSAR_peak_ | 12.13         | - |
| chr3 | 22723574 | 22723625 | CSAR_peak_ | 7.27          | - |
| chr3 | 22723732 | 22723824 | CSAR_peak_ | 9.58,7.27     | - |
| chr3 | 22724289 | 22724344 | CSAR_peak_ | 8.39          | - |
| chr3 | 22724433 | 22724512 | CSAR_peak_ | 7.27          | - |
| chr3 | 22724756 | 22724808 | CSAR_peak_ | 9.58          | - |
| chr3 | 22725158 | 22725199 | CSAR_peak_ | 5.86          | - |
| chr3 | 22727208 | 22727279 | CSAR_peak_ | 14.88         | - |
| chr3 | 22727752 | 22727785 | CSAR_peak_ | 7.27          | - |
| chr3 | 22728135 | 22728218 | CSAR_peak_ | 14.88,19.36   | - |
| chr3 | 22728349 | 22728408 | CSAR_peak_ | 22.56         | - |
| chr3 | 22728700 | 22728741 | CSAR_peak_ | 9.58          | - |
| chr3 | 22728859 | 22728929 | CSAR_peak_ | 9.25,17.88    | - |
| chr3 | 22729152 | 22729226 | CSAR_peak_ | 12.17,33.03   | - |
| chr3 | 22729763 | 22729776 | CSAR_peak_ | 6.94,12.74    | - |
| chr3 | 22729780 | 22729846 | CSAR_peak_ | 17.51,14.85   | - |
| chr3 | 22729931 | 22730087 | CSAR_peak_ | 17.37,15.68   | - |
| chr3 | 22730186 | 22730243 | CSAR_peak_ | 6.21,7.27     | - |
| chr3 | 22730549 | 22730589 | CSAR_peak_ | 12.13         | - |
| chr3 | 22730673 | 22730719 | CSAR_peak_ | 9.77          | - |
| chr3 | 22730733 | 22730769 | CSAR_peak_ | 14.88         | - |
| chr3 | 22730859 | 22730912 | CSAR_peak_ | 20.13         | - |
| chr3 | 22731706 | 22731788 | CSAR_peak_ | 20.94,9.58    | - |
| chr3 | 22801527 | 22801566 | CSAR_peak_ | 9.58          | - |
| chr3 | 22802859 | 22802920 | CSAR_peak_ | 9.58          | - |
| chr3 | 22810319 | 22810334 | CSAR_peak_ | 6.44          | - |
| chr3 | 22810361 | 22810486 | CSAR_peak_ | 24.21,31.29,- | - |
| chr3 | 22810515 | 22810565 | CSAR_peak_ | 7.27          | - |
| chr3 | 22810579 | 22810650 | CSAR_peak_ | 18.1,7.26     | - |
| chr3 | 22839930 | 22839979 | CSAR_peak_ | 6.21          | - |
| chr3 | 22840108 | 22840170 | CSAR_peak_ | 6.95,14.88    | - |
| chr3 | 22840461 | 22840498 | CSAR_peak_ | 6.21          | - |
| chr3 | 22841015 | 22841061 | CSAR_peak_ | 9.48          | - |
| chr3 | 22841347 | 22841377 | CSAR_peak_ | 9.77          | - |
| chr3 | 22854048 | 22854128 | CSAR_peak_ | 8.65          | - |
| chr3 | 22854901 | 22854958 | CSAR_peak_ | 13.48         | - |
| chr3 | 22855145 | 22855162 | CSAR_peak_ | 11.14         | - |
| chr3 | 22855431 | 22855482 | CSAR_peak_ | 24.52,11.96   | - |
| chr3 | 22855823 | 22855868 | CSAR_peak_ | 6.21          | - |
| chr3 | 22900300 | 22900342 | CSAR_peak_ | 7.27          | - |

|      |          |          |            |               |   |
|------|----------|----------|------------|---------------|---|
| chr3 | 22900427 | 22900545 | CSAR_peak_ | 12.6,14.76    | - |
| chr3 | 22900628 | 22900698 | CSAR_peak_ | 13.66,8.65    | - |
| chr3 | 22900915 | 22900988 | CSAR_peak_ | 12.13         | - |
| chr3 | 22901143 | 22901349 | CSAR_peak_ | 29.2,15.9,6.2 | - |
| chr3 | 22901623 | 22901667 | CSAR_peak_ | 7.27          | - |
| chr3 | 22902044 | 22902181 | CSAR_peak_ | 16.78,5.95,1  | - |
| chr3 | 22942621 | 22942659 | CSAR_peak_ | 7.27          | - |
| chr3 | 22942786 | 22942832 | CSAR_peak_ | 7.27          | - |
| chr3 | 22943534 | 22943574 | CSAR_peak_ | 8.39          | - |
| chr3 | 22943665 | 22943747 | CSAR_peak_ | 9.58          | - |
| chr3 | 22944630 | 22944676 | CSAR_peak_ | 7.92          | - |
| chr3 | 22957511 | 22957534 | CSAR_peak_ | 13.69,6.85    | - |
| chr3 | 22957603 | 22957691 | CSAR_peak_ | 10.52,10.02   | - |
| chr3 | 22957889 | 22957968 | CSAR_peak_ | 13.44         | - |
| chr3 | 22958069 | 22958136 | CSAR_peak_ | 6.21          | - |
| chr3 | 22958296 | 22958386 | CSAR_peak_ | 14.76,11.83   | - |
| chr3 | 22959413 | 22959483 | CSAR_peak_ | 9.72          | - |
| chr3 | 22959587 | 22959639 | CSAR_peak_ | 20.13         | - |
| chr3 | 22959756 | 22959818 | CSAR_peak_ | 7.92,12.13    | - |
| chr3 | 22960457 | 22960516 | CSAR_peak_ | 6.21          | - |
| chr3 | 22975343 | 22975436 | CSAR_peak_ | 10.02,17.28   | - |
| chr3 | 22975595 | 22975671 | CSAR_peak_ | 22.56,12.13   | - |
| chr3 | 22975757 | 22975822 | CSAR_peak_ | 14.88         | - |
| chr3 | 22976004 | 22976090 | CSAR_peak_ | 17.37,6.1,5.8 | - |
| chr3 | 22976116 | 22976222 | CSAR_peak_ | 11.96,31.2    | - |
| chr3 | 22976264 | 22976375 | CSAR_peak_ | 20.18,25.07   | - |
| chr3 | 22976479 | 22976560 | CSAR_peak_ | 10.12,23.95   | - |
| chr3 | 22997952 | 22998015 | CSAR_peak_ | 12.13         | - |
| chr3 | 22998411 | 22998437 | CSAR_peak_ | 6.57          | - |
| chr3 | 23001733 | 23001792 | CSAR_peak_ | 9.03,14.88    | - |
| chr3 | 23001903 | 23001968 | CSAR_peak_ | 6.21,12.13    | - |
| chr3 | 23002142 | 23002188 | CSAR_peak_ | 7.27          | - |
| chr3 | 23002269 | 23002373 | CSAR_peak_ | 12.59,14.76,  | - |
| chr3 | 23003520 | 23003567 | CSAR_peak_ | 7.27          | - |
| chr3 | 23003683 | 23003705 | CSAR_peak_ | 9.58          | - |
| chr3 | 23003708 | 23003738 | CSAR_peak_ | 5.86          | - |
| chr3 | 23009087 | 23009109 | CSAR_peak_ | 6.21          | - |
| chr3 | 23009242 | 23009372 | CSAR_peak_ | 13.48,12.13   | - |
| chr3 | 23009389 | 23009468 | CSAR_peak_ | 8.65,13.48    | - |
| chr3 | 23009991 | 23010055 | CSAR_peak_ | 17.82,12.13   | - |
| chr3 | 23010084 | 23010281 | CSAR_peak_ | 12.74,5.86,6. | - |
| chr3 | 23010548 | 23010621 | CSAR_peak_ | 12.13,7.27    | - |

|      |          |          |            |                |   |
|------|----------|----------|------------|----------------|---|
| chr3 | 23011081 | 23011120 | CSAR_peak_ | 6.57           | - |
| chr3 | 23011273 | 23011346 | CSAR_peak_ | 24.21,12.13    | - |
| chr3 | 23011486 | 23011557 | CSAR_peak_ | 17.37,12.17    | - |
| chr3 | 23011657 | 23011823 | CSAR_peak_ | 10.18,10.7,7.  | - |
| chr3 | 23012777 | 23012971 | CSAR_peak_ | 28.34,24.21    | - |
| chr3 | 23013072 | 23013120 | CSAR_peak_ | 9.58,17.82     | - |
| chr3 | 23013211 | 23013273 | CSAR_peak_ | 13.48          | - |
| chr3 | 23013424 | 23013527 | CSAR_peak_ | 9.58,6.21      | - |
| chr3 | 23029740 | 23029778 | CSAR_peak_ | 7.58           | - |
| chr3 | 23030305 | 23030357 | CSAR_peak_ | 6.21           | - |
| chr3 | 23030570 | 23030615 | CSAR_peak_ | 6.21           | - |
| chr3 | 23033805 | 23033856 | CSAR_peak_ | 9.58           | - |
| chr3 | 23034030 | 23034087 | CSAR_peak_ | 7.58,6.03      | - |
| chr3 | 23034726 | 23034791 | CSAR_peak_ | 12.13          | - |
| chr3 | 23035811 | 23035864 | CSAR_peak_ | 13.48,7.92     | - |
| chr3 | 23036045 | 23036111 | CSAR_peak_ | 8.28,6.95      | - |
| chr3 | 23038603 | 23038659 | CSAR_peak_ | 6.1,9.27       | - |
| chr3 | 23038689 | 23038757 | CSAR_peak_ | 18.95,14.76    | - |
| chr3 | 23038802 | 23038853 | CSAR_peak_ | 6.03           | - |
| chr3 | 23038976 | 23039078 | CSAR_peak_ | 13.51,20.94    | - |
| chr3 | 23039087 | 23039138 | CSAR_peak_ | 8.2            | - |
| chr3 | 23039348 | 23039510 | CSAR_peak_ | 20.94,14.88,.- | - |
| chr3 | 23039533 | 23039578 | CSAR_peak_ | 8.58           | - |
| chr3 | 23039583 | 23039635 | CSAR_peak_ | 9.58,7         | - |
| chr3 | 23039661 | 23039705 | CSAR_peak_ | 8.39           | - |
| chr3 | 23039708 | 23039789 | CSAR_peak_ | 17.19,14.93    | - |
| chr3 | 23039796 | 23039888 | CSAR_peak_ | 7.58           | - |
| chr3 | 23039915 | 23039977 | CSAR_peak_ | 9.58           | - |
| chr3 | 23040135 | 23040190 | CSAR_peak_ | 17.82,12.13    | - |
| chr3 | 23040219 | 23040274 | CSAR_peak_ | 29.4,7.27      | - |
| chr3 | 23040343 | 23040460 | CSAR_peak_ | 19.21          | - |
| chr3 | 23044245 | 23044301 | CSAR_peak_ | 7,12.13        | - |
| chr3 | 23044729 | 23044780 | CSAR_peak_ | 9.97           | - |
| chr3 | 23045092 | 23045136 | CSAR_peak_ | 8.39           | - |
| chr3 | 23045437 | 23045451 | CSAR_peak_ | 9.58           | - |
| chr3 | 23045530 | 23045609 | CSAR_peak_ | 27.64,7.73     | - |
| chr3 | 23057751 | 23057842 | CSAR_peak_ | 5.86,7.27      | - |
| chr3 | 23057948 | 23057988 | CSAR_peak_ | 10.83          | - |
| chr3 | 23058038 | 23058146 | CSAR_peak_ | 7.27,13.66     | - |
| chr3 | 23058877 | 23058937 | CSAR_peak_ | 12.17          | - |
| chr3 | 23059949 | 23060004 | CSAR_peak_ | 7.27,6.21      | - |
| chr3 | 23060059 | 23060120 | CSAR_peak_ | 9.58           | - |

|      |          |          |            |                  |   |
|------|----------|----------|------------|------------------|---|
| chr3 | 23063087 | 23063129 | CSAR_peak_ | 6.21             | - |
| chr3 | 23063336 | 23063408 | CSAR_peak_ | 7.58,9.77        | - |
| chr3 | 23063604 | 23063706 | CSAR_peak_ | 8.39,9.58        | - |
| chr3 | 23063946 | 23064046 | CSAR_peak_ | 7,8.39,7.27      | - |
| chr3 | 23064125 | 23064160 | CSAR_peak_ | 6.21             | - |
| chr3 | 23064806 | 23064935 | CSAR_peak_ | 16.33,13.48      | - |
| chr3 | 23075772 | 23075804 | CSAR_peak_ | 7.27             | - |
| chr3 | 23076241 | 23076356 | CSAR_peak_ | 7.58,7.58        | - |
| chr3 | 23078802 | 23078841 | CSAR_peak_ | 7.27             | - |
| chr3 | 23079738 | 23079782 | CSAR_peak_ | 14.88            | - |
| chr3 | 23080076 | 23080117 | CSAR_peak_ | 8.39             | - |
| chr3 | 23080354 | 23080392 | CSAR_peak_ | 6.21             | - |
| chr3 | 23087544 | 23087601 | CSAR_peak_ | 6.57             | - |
| chr3 | 23089662 | 23089716 | CSAR_peak_ | 12.13            | - |
| chr3 | 23091369 | 23091490 | CSAR_peak_ | 10.83,9.58       | - |
| chr3 | 23091601 | 23091700 | CSAR_peak_ | 11.14,9.58       | - |
| chr3 | 23091729 | 23091830 | CSAR_peak_ | 6.44             | - |
| chr3 | 23091885 | 23092069 | CSAR_peak_ | 10.02,20.94,9.58 | - |
| chr3 | 23092139 | 23092322 | CSAR_peak_ | 8.13,9.77,29.58  | - |
| chr3 | 23092369 | 23092406 | CSAR_peak_ | 6.21             | - |
| chr3 | 23092538 | 23092644 | CSAR_peak_ | 7.27,10.95,6.21  | - |
| chr3 | 23181703 | 23181834 | CSAR_peak_ | 17.81,8.02,20.94 | - |
| chr3 | 23190945 | 23190994 | CSAR_peak_ | 7.27             | - |
| chr3 | 23191094 | 23191118 | CSAR_peak_ | 6.21             | - |
| chr3 | 23192095 | 23192139 | CSAR_peak_ | 7.27             | - |
| chr3 | 23192978 | 23193092 | CSAR_peak_ | 11.32,9.72       | - |
| chr3 | 23193125 | 23193171 | CSAR_peak_ | 7.27             | - |
| chr3 | 23193415 | 23193506 | CSAR_peak_ | 9.77             | - |
| chr3 | 23193571 | 23193633 | CSAR_peak_ | 13.48            | - |
| chr3 | 23193693 | 23193737 | CSAR_peak_ | 7.27             | - |
| chr3 | 23219540 | 23219612 | CSAR_peak_ | 9.48,12.59       | - |
| chr3 | 23220349 | 23220428 | CSAR_peak_ | 20.94,10.83      | - |
| chr3 | 23235932 | 23235975 | CSAR_peak_ | 8.39             | - |
| chr3 | 23237387 | 23237439 | CSAR_peak_ | 13.48            | - |
| chr3 | 23238279 | 23238329 | CSAR_peak_ | 7.27             | - |
| chr3 | 23239122 | 23239172 | CSAR_peak_ | 6.21             | - |
| chr3 | 23239954 | 23239996 | CSAR_peak_ | 7.58             | - |
| chr3 | 23240003 | 23240054 | CSAR_peak_ | 10.83            | - |
| chr3 | 23240125 | 23240165 | CSAR_peak_ | 8.39,10.83       | - |
| chr3 | 23240672 | 23240719 | CSAR_peak_ | 6.95             | - |
| chr3 | 23241734 | 23241765 | CSAR_peak_ | 10.52            | - |
| chr3 | 23241929 | 23242016 | CSAR_peak_ | 17.82,10.83      | - |

|      |          |          |            |               |   |
|------|----------|----------|------------|---------------|---|
| chr3 | 23243521 | 23243570 | CSAR_peak_ | 12.17         | - |
| chr3 | 23251647 | 23251756 | CSAR_peak_ | 13.48         | - |
| chr3 | 23251920 | 23251992 | CSAR_peak_ | 7.27,7.27     | - |
| chr3 | 23252430 | 23252511 | CSAR_peak_ | 7.27          | - |
| chr3 | 23252838 | 23252919 | CSAR_peak_ | 7.27          | - |
| chr3 | 23254020 | 23254110 | CSAR_peak_ | 9.58          | - |
| chr3 | 23254852 | 23254909 | CSAR_peak_ | 8.39          | - |
| chr3 | 23259672 | 23259702 | CSAR_peak_ | 5.86          | - |
| chr3 | 23259925 | 23260006 | CSAR_peak_ | 20.43,9.61    | - |
| chr3 | 23273652 | 23273704 | CSAR_peak_ | 7.27          | - |
| chr3 | 23274938 | 23274982 | CSAR_peak_ | 8.39          | - |
| chr3 | 23276035 | 23276076 | CSAR_peak_ | 9.77,7.34     | - |
| chr3 | 23298872 | 23299135 | CSAR_peak_ | 184.65,33.57  | - |
| chr3 | 23327038 | 23327108 | CSAR_peak_ | 12.17         | - |
| chr3 | 23327486 | 23327545 | CSAR_peak_ | 12.13,14.76   | - |
| chr3 | 23327616 | 23327682 | CSAR_peak_ | 12.31,21.35   | - |
| chr3 | 23327739 | 23327765 | CSAR_peak_ | 8.52          | - |
| chr3 | 23327904 | 23327925 | CSAR_peak_ | 10.83         | - |
| chr3 | 23328027 | 23328085 | CSAR_peak_ | 6.21          | - |
| chr3 | 23329425 | 23329463 | CSAR_peak_ | 7.27          | - |
| chr3 | 23329629 | 23329672 | CSAR_peak_ | 6.03          | - |
| chr3 | 23329894 | 23329954 | CSAR_peak_ | 12.17         | - |
| chr3 | 23330076 | 23330130 | CSAR_peak_ | 14.88,7.27    | - |
| chr3 | 23330288 | 23330343 | CSAR_peak_ | 9.58          | - |
| chr3 | 23330392 | 23330469 | CSAR_peak_ | 7.27          | - |
| chr3 | 23332027 | 23332124 | CSAR_peak_ | 7.27          | - |
| chr3 | 23333858 | 23333993 | CSAR_peak_ | 8.2,6.03,5.86 | - |
| chr3 | 23334721 | 23334776 | CSAR_peak_ | 7.92          | - |
| chr3 | 23338629 | 23338689 | CSAR_peak_ | 6.21,7.58     | - |
| chr3 | 23339835 | 23339905 | CSAR_peak_ | 7,8.14        | - |
| chr3 | 23340077 | 23340163 | CSAR_peak_ | 5.95,6.95     | - |
| chr3 | 23343291 | 23343354 | CSAR_peak_ | 9.72,7        | - |
| chr3 | 23343493 | 23343531 | CSAR_peak_ | 12.13         | - |
| chr3 | 23343626 | 23343685 | CSAR_peak_ | 12.13         | - |
| chr3 | 23343892 | 23343930 | CSAR_peak_ | 12.74         | - |
| chr3 | 23344005 | 23344101 | CSAR_peak_ | 17.4,7.7,16.0 | - |
| chr3 | 23370687 | 23370733 | CSAR_peak_ | 8.39          | - |
| chr3 | 23370808 | 23370854 | CSAR_peak_ | 7.27          | - |
| chr3 | 23371560 | 23371650 | CSAR_peak_ | 7.92,11.66    | - |
| chr3 | 23373524 | 23373528 | CSAR_peak_ | 8.39,6.21     | - |
| chr3 | 23373606 | 23373765 | CSAR_peak_ | 25.18,14.88   | - |
| chr3 | 23388451 | 23388575 | CSAR_peak_ | 7.58,17.51,9. | - |

|      |          |          |            |               |   |
|------|----------|----------|------------|---------------|---|
| chr3 | 23388850 | 23388900 | CSAR_peak_ | 7.27          | - |
| chr3 | 23392217 | 23392311 | CSAR_peak_ | 6.21,8.39     | - |
| chr3 | 23393186 | 23393270 | CSAR_peak_ | 20.43,7.27    | - |
| chr3 | 23393764 | 23393817 | CSAR_peak_ | 12.13,7.27    | - |
| chr3 | 23393941 | 23394084 | CSAR_peak_ | 19.36,7.58    | - |
| chr3 | 23395261 | 23395433 | CSAR_peak_ | 14.76,36.78   | - |
| chr3 | 23395568 | 23395632 | CSAR_peak_ | 8.39,6.21     | - |
| chr3 | 23398076 | 23398135 | CSAR_peak_ | 12.13         | - |
| chr3 | 23416319 | 23416358 | CSAR_peak_ | 6.21          | - |
| chr3 | 23430371 | 23430423 | CSAR_peak_ | 6.21          | - |
| chr3 | 23431039 | 23431102 | CSAR_peak_ | 19.36,16.11   | - |
| chr3 | 23431192 | 23431255 | CSAR_peak_ | 19.96,13.48   | - |
| chr3 | 23431281 | 23431418 | CSAR_peak_ | 26.55,9.58    | - |
| chr3 | 23431520 | 23431560 | CSAR_peak_ | 9.58          | - |
| chr3 | 23432753 | 23432793 | CSAR_peak_ | 7.27          | - |
| chr3 | 23432870 | 23432909 | CSAR_peak_ | 7.58,17.82    | - |
| chr3 | 23433172 | 23433364 | CSAR_peak_ | 9.32,12.6,10. | - |
| chr3 | 23433421 | 23433473 | CSAR_peak_ | 9.58          | - |
| chr3 | 23433647 | 23433732 | CSAR_peak_ | 9.58,12.13    | - |
| chr3 | 23433835 | 23433922 | CSAR_peak_ | 13.48,7.27    | - |
| chr3 | 23433924 | 23434038 | CSAR_peak_ | 13.51,6.21    | - |
| chr3 | 23434119 | 23434299 | CSAR_peak_ | 17.68,12.31   | - |
| chr3 | 23434348 | 23434407 | CSAR_peak_ | 10.07,9.43    | - |
| chr3 | 23434475 | 23434605 | CSAR_peak_ | 21.22,12.13   | - |
| chr3 | 23434946 | 23434966 | CSAR_peak_ | 6.57          | - |
| chr3 | 23435289 | 23435420 | CSAR_peak_ | 21.94,6.03,2. | - |
| chr3 | 23435505 | 23435615 | CSAR_peak_ | 18.9,13       | - |
| chr3 | 23435804 | 23435903 | CSAR_peak_ | 13.29,15.68   | - |
| chr3 | 23435951 | 23436057 | CSAR_peak_ | 37.42,19.36   | - |
| chr3 | 23436144 | 23436181 | CSAR_peak_ | 18.65,7.26    | - |
| chr3 | 23436296 | 23436356 | CSAR_peak_ | 10.02         | - |
| chr3 | 23441409 | 23441461 | CSAR_peak_ | 7.27          | - |
| chr3 | 23443036 | 23443088 | CSAR_peak_ | 13.48,7.58    | - |
| chr3 | 23446446 | 23446661 | CSAR_peak_ | 8.2,12.59,8.6 | - |
| chr3 | 23447909 | 23447998 | CSAR_peak_ | 12.17         | - |
| chr3 | 23448586 | 23448658 | CSAR_peak_ | 17.82,10.62   | - |
| chr3 | 23448791 | 23448889 | CSAR_peak_ | 10.83,7.27    | - |
| chr3 | 23448937 | 23448999 | CSAR_peak_ | 10.7          | - |
| chr3 | 23449102 | 23449159 | CSAR_peak_ | 12.5,8.28     | - |
| chr3 | 23449925 | 23449993 | CSAR_peak_ | 6.21          | - |
| chr4 | 14299    | 14323    | CSAR_peak_ | 8.28          | + |
| chr4 | 14947    | 15007    | CSAR_peak_ | 7.27          | + |

|      |        |        |             |                |   |
|------|--------|--------|-------------|----------------|---|
| chr4 | 15541  | 15596  | CSAR_peak_4 | 6.21           | + |
| chr4 | 15670  | 15720  | CSAR_peak_4 | 7.27           | + |
| chr4 | 25183  | 25231  | CSAR_peak_4 | 6.21           | + |
| chr4 | 37151  | 37195  | CSAR_peak_4 | 6.22,7.06      | + |
| chr4 | 37686  | 37758  | CSAR_peak_4 | 12.13          | + |
| chr4 | 38433  | 38507  | CSAR_peak_4 | 6.03           | + |
| chr4 | 130023 | 130067 | CSAR_peak_4 | 7.27           | + |
| chr4 | 155800 | 155903 | CSAR_peak_4 | 9.58,18.73     | + |
| chr4 | 155986 | 155999 | CSAR_peak_4 | 6.03           | + |
| chr4 | 161856 | 161894 | CSAR_peak_4 | 7.27           | + |
| chr4 | 162140 | 162195 | CSAR_peak_4 | 6.21           | + |
| chr4 | 162550 | 162598 | CSAR_peak_4 | 6.21           | + |
| chr4 | 274613 | 274681 | CSAR_peak_4 | 6.21,6.95      | + |
| chr4 | 274901 | 274946 | CSAR_peak_4 | 10.95,19.36    | + |
| chr4 | 275109 | 275170 | CSAR_peak_4 | 6.87,13.51     | + |
| chr4 | 291143 | 291178 | CSAR_peak_4 | 6.95           | + |
| chr4 | 292488 | 292531 | CSAR_peak_4 | 7.34           | + |
| chr4 | 317063 | 317110 | CSAR_peak_4 | 6.21           | + |
| chr4 | 419457 | 419499 | CSAR_peak_4 | 8.39,6.03      | + |
| chr4 | 422157 | 422192 | CSAR_peak_4 | 26.3,9.56      | + |
| chr4 | 427920 | 427974 | CSAR_peak_4 | 9.58           | + |
| chr4 | 447840 | 447904 | CSAR_peak_4 | 10.31          | + |
| chr4 | 456846 | 456886 | CSAR_peak_4 | 7.27           | + |
| chr4 | 457483 | 457526 | CSAR_peak_4 | 9.58           | + |
| chr4 | 477405 | 477452 | CSAR_peak_4 | 6.57           | + |
| chr4 | 494136 | 494163 | CSAR_peak_4 | 7.27           | + |
| chr4 | 551196 | 551310 | CSAR_peak_4 | 9.27,5.95      | + |
| chr4 | 551570 | 551604 | CSAR_peak_4 | 8.28           | + |
| chr4 | 551835 | 551890 | CSAR_peak_4 | 8.13,6.64      | + |
| chr4 | 551986 | 552058 | CSAR_peak_4 | 9.58,8.39      | + |
| chr4 | 552062 | 552147 | CSAR_peak_4 | 8.99,6.91,9.5  | + |
| chr4 | 552179 | 552283 | CSAR_peak_4 | 8.5,14.88,14.  | + |
| chr4 | 552791 | 552864 | CSAR_peak_4 | 13.48,14.88    | + |
| chr4 | 564917 | 564952 | CSAR_peak_4 | 8.39           | + |
| chr4 | 565029 | 565100 | CSAR_peak_4 | 6.21,6.03      | + |
| chr4 | 565133 | 565249 | CSAR_peak_4 | 9.97,7.92      | + |
| chr4 | 565266 | 565335 | CSAR_peak_4 | 6.21,8.39      | + |
| chr4 | 565395 | 565415 | CSAR_peak_4 | 7.27           | + |
| chr4 | 565665 | 565718 | CSAR_peak_4 | 8.39           | + |
| chr4 | 565871 | 565964 | CSAR_peak_4 | 12.13,7.27     | + |
| chr4 | 565992 | 566171 | CSAR_peak_4 | 34.93,6.57,1(+ |   |
| chr4 | 626654 | 626675 | CSAR_peak_4 | 10.83          | + |

|      |         |         |             |               |   |
|------|---------|---------|-------------|---------------|---|
| chr4 | 626750  | 626759  | CSAR_peak_4 | 8.39          | + |
| chr4 | 627540  | 627591  | CSAR_peak_4 | 12.13         | + |
| chr4 | 687719  | 687752  | CSAR_peak_4 | 8.33          | + |
| chr4 | 687838  | 687869  | CSAR_peak_4 | 5.62          | + |
| chr4 | 687873  | 687988  | CSAR_peak_4 | 8.81,64.98,7. | + |
| chr4 | 730509  | 730569  | CSAR_peak_4 | 8.39          | + |
| chr4 | 730667  | 730754  | CSAR_peak_4 | 12.17         | + |
| chr4 | 731835  | 731908  | CSAR_peak_4 | 16.11         | + |
| chr4 | 747110  | 747152  | CSAR_peak_4 | 14.76         | + |
| chr4 | 815347  | 815413  | CSAR_peak_4 | 54.4,14.12    | + |
| chr4 | 889681  | 889727  | CSAR_peak_4 | 13.44         | + |
| chr4 | 890228  | 890269  | CSAR_peak_4 | 8.39          | + |
| chr4 | 890870  | 890911  | CSAR_peak_4 | 7.27          | + |
| chr4 | 891641  | 891693  | CSAR_peak_4 | 12.13         | + |
| chr4 | 893365  | 893414  | CSAR_peak_4 | 6.21          | + |
| chr4 | 921882  | 921927  | CSAR_peak_4 | 6.21          | + |
| chr4 | 942296  | 942387  | CSAR_peak_4 | 8.65          | + |
| chr4 | 942474  | 942530  | CSAR_peak_4 | 13.51         | + |
| chr4 | 942644  | 942690  | CSAR_peak_4 | 8.65,7.27,6.9 | + |
| chr4 | 942776  | 942828  | CSAR_peak_4 | 10.02,12.31   | + |
| chr4 | 942915  | 942954  | CSAR_peak_4 | 7.92          | + |
| chr4 | 943087  | 943162  | CSAR_peak_4 | 7.92,9.03,13. | + |
| chr4 | 943579  | 943628  | CSAR_peak_4 | 9.27,6.57     | + |
| chr4 | 986234  | 986280  | CSAR_peak_4 | 7.27          | + |
| chr4 | 986950  | 987033  | CSAR_peak_4 | 13.48         | + |
| chr4 | 987133  | 987208  | CSAR_peak_4 | 8.65,8.65     | + |
| chr4 | 987431  | 987486  | CSAR_peak_4 | 8.65          | + |
| chr4 | 988251  | 988346  | CSAR_peak_4 | 17.51,14.76   | + |
| chr4 | 988616  | 988650  | CSAR_peak_4 | 7.27          | + |
| chr4 | 988984  | 988999  | CSAR_peak_4 | 6.02          | + |
| chr4 | 989143  | 989190  | CSAR_peak_4 | 9.72,5.62     | + |
| chr4 | 989240  | 989298  | CSAR_peak_4 | 6.03          | + |
| chr4 | 989649  | 989722  | CSAR_peak_4 | 7.27          | + |
| chr4 | 990246  | 990322  | CSAR_peak_4 | 6.44,6.44     | + |
| chr4 | 990626  | 990663  | CSAR_peak_4 | 6.03          | + |
| chr4 | 1036997 | 1037057 | CSAR_peak_4 | 12.31         | + |
| chr4 | 1038140 | 1038191 | CSAR_peak_4 | 10.31         | + |
| chr4 | 1038277 | 1038325 | CSAR_peak_4 | 8.39          | + |
| chr4 | 1038771 | 1038922 | CSAR_peak_4 | 7.68,16.33,6. | + |
| chr4 | 1038930 | 1038997 | CSAR_peak_4 | 12.74         | + |
| chr4 | 1039164 | 1039219 | CSAR_peak_4 | 7.27          | + |
| chr4 | 1040022 | 1040087 | CSAR_peak_4 | 9.79,27.11    | + |



|      |         |         |            |               |   |
|------|---------|---------|------------|---------------|---|
| chr4 | 1040169 | 1040270 | CSAR_peak_ | 12.13,7.27    | + |
| chr4 | 1040421 | 1040540 | CSAR_peak_ | 6.57,7.27     | + |
| chr4 | 1043232 | 1043334 | CSAR_peak_ | 8.95,7.27,5.6 | + |
| chr4 | 1044910 | 1044973 | CSAR_peak_ | 7.27          | + |
| chr4 | 1069236 | 1069273 | CSAR_peak_ | 6.21          | + |
| chr4 | 1069458 | 1069524 | CSAR_peak_ | 12.13         | + |
| chr4 | 1069885 | 1069949 | CSAR_peak_ | 14.76,6.52    | + |
| chr4 | 1070380 | 1070418 | CSAR_peak_ | 7.7           | + |
| chr4 | 1070526 | 1070543 | CSAR_peak_ | 9.41          | + |
| chr4 | 1070730 | 1070784 | CSAR_peak_ | 12.31         | + |
| chr4 | 1071002 | 1071059 | CSAR_peak_ | 11.14,6.57    | + |
| chr4 | 1103000 | 1103043 | CSAR_peak_ | 6.21          | + |
| chr4 | 1105267 | 1105395 | CSAR_peak_ | 9.77,11.38    | + |
| chr4 | 1105516 | 1105940 | CSAR_peak_ | 6.21,18.95,8. | + |
| chr4 | 1105966 | 1106024 | CSAR_peak_ | 12.13         | + |
| chr4 | 1106028 | 1106240 | CSAR_peak_ | 8.39,10.83,7. | + |
| chr4 | 1106334 | 1106542 | CSAR_peak_ | 9.58,33.03,8. | + |
| chr4 | 1106567 | 1106809 | CSAR_peak_ | 12.17,6.21,5. | + |
| chr4 | 1106902 | 1106972 | CSAR_peak_ | 22.56,5.92,8. | + |
| chr4 | 1107152 | 1107213 | CSAR_peak_ | 18.73         | + |
| chr4 | 1107359 | 1107403 | CSAR_peak_ | 6.21          | + |
| chr4 | 1107638 | 1107704 | CSAR_peak_ | 6.21          | + |
| chr4 | 1108419 | 1108482 | CSAR_peak_ | 5.62          | + |
| chr4 | 1108809 | 1108977 | CSAR_peak_ | 7.27,5.67,13. | + |
| chr4 | 1109166 | 1109271 | CSAR_peak_ | 13.48,7.27    | + |
| chr4 | 1109306 | 1109365 | CSAR_peak_ | 19.36         | + |
| chr4 | 1110551 | 1110601 | CSAR_peak_ | 6.21          | + |
| chr4 | 1110763 | 1110828 | CSAR_peak_ | 12.5          | + |
| chr4 | 1111474 | 1111523 | CSAR_peak_ | 6.21          | + |
| chr4 | 1117265 | 1117311 | CSAR_peak_ | 6.21          | + |
| chr4 | 1118818 | 1118868 | CSAR_peak_ | 7.27          | + |
| chr4 | 1122602 | 1122682 | CSAR_peak_ | 61.49,31.1    | + |
| chr4 | 1122771 | 1122792 | CSAR_peak_ | 27.66         | + |
| chr4 | 1122833 | 1122852 | CSAR_peak_ | 15.41,5.63    | + |
| chr4 | 1128807 | 1128859 | CSAR_peak_ | 7.58          | + |
| chr4 | 1129341 | 1129446 | CSAR_peak_ | 6.44,6.21,12. | + |
| chr4 | 1129527 | 1129573 | CSAR_peak_ | 17.82         | + |
| chr4 | 1130808 | 1130871 | CSAR_peak_ | 6.95          | + |
| chr4 | 1131296 | 1131326 | CSAR_peak_ | 7.27,8.39     | + |
| chr4 | 1132058 | 1132180 | CSAR_peak_ | 16.33         | + |
| chr4 | 1132302 | 1132344 | CSAR_peak_ | 12.13         | + |
| chr4 | 1132584 | 1132668 | CSAR_peak_ | 9.58,8.95     | + |

|      |         |         |             |               |   |
|------|---------|---------|-------------|---------------|---|
| chr4 | 1133199 | 1133245 | CSAR_peak_4 | 7.27          | + |
| chr4 | 1145385 | 1145394 | CSAR_peak_4 | 6.44          | + |
| chr4 | 1145395 | 1145458 | CSAR_peak_4 | 18.35,9.27    | + |
| chr4 | 1145944 | 1145973 | CSAR_peak_4 | 6.85          | + |
| chr4 | 1146273 | 1146348 | CSAR_peak_4 | 7.73,6.21     | + |
| chr4 | 1146445 | 1146477 | CSAR_peak_4 | 8.65          | + |
| chr4 | 1146558 | 1146626 | CSAR_peak_4 | 13            | + |
| chr4 | 1155892 | 1155949 | CSAR_peak_4 | 6.57,6.95     | + |
| chr4 | 1275578 | 1275639 | CSAR_peak_4 | 16.33,21.94   | + |
| chr4 | 1275742 | 1275785 | CSAR_peak_4 | 8.39,12.13    | + |
| chr4 | 1276165 | 1276240 | CSAR_peak_4 | 6.44          | + |
| chr4 | 1276245 | 1276320 | CSAR_peak_4 | 7.27          | + |
| chr4 | 1276537 | 1276573 | CSAR_peak_4 | 6.57          | + |
| chr4 | 1276626 | 1276711 | CSAR_peak_4 | 8.39,17.51,9. | + |
| chr4 | 1277074 | 1277134 | CSAR_peak_4 | 7.27          | + |
| chr4 | 1309422 | 1309480 | CSAR_peak_4 | 7.92,5.62     | + |
| chr4 | 1411853 | 1411883 | CSAR_peak_4 | 8.39          | + |
| chr4 | 1429476 | 1429538 | CSAR_peak_4 | 6.21          | + |
| chr4 | 1440492 | 1440545 | CSAR_peak_4 | 12.31         | + |
| chr4 | 1472827 | 1472883 | CSAR_peak_4 | 6.99,6.72     | + |
| chr4 | 1476385 | 1476497 | CSAR_peak_4 | 15.37         | + |
| chr4 | 1502446 | 1502490 | CSAR_peak_4 | 6.57          | + |
| chr4 | 1513082 | 1513135 | CSAR_peak_4 | 11.14         | + |
| chr4 | 1575521 | 1575576 | CSAR_peak_4 | 8.39          | + |
| chr4 | 1575642 | 1575710 | CSAR_peak_4 | 8.39          | + |
| chr4 | 1576542 | 1576590 | CSAR_peak_4 | 8.39          | + |
| chr4 | 1581400 | 1581455 | CSAR_peak_4 | 8.13,6.03     | + |
| chr4 | 1581893 | 1581954 | CSAR_peak_4 | 7.78,7.51     | + |
| chr4 | 1582522 | 1582531 | CSAR_peak_4 | 7.27          | + |
| chr4 | 1582553 | 1582596 | CSAR_peak_4 | 16.22         | + |
| chr4 | 1582783 | 1582815 | CSAR_peak_4 | 10.94         | + |
| chr4 | 1582961 | 1582979 | CSAR_peak_4 | 9.79          | + |
| chr4 | 1582989 | 1583034 | CSAR_peak_4 | 10.57         | + |
| chr4 | 1583574 | 1583588 | CSAR_peak_4 | 6.03          | + |
| chr4 | 1583857 | 1583866 | CSAR_peak_4 | 6.03          | + |
| chr4 | 1584126 | 1584183 | CSAR_peak_4 | 6.57          | + |
| chr4 | 1584220 | 1584259 | CSAR_peak_4 | 6.21          | + |
| chr4 | 1584317 | 1584360 | CSAR_peak_4 | 15.43,5.79    | + |
| chr4 | 1584639 | 1584663 | CSAR_peak_4 | 6.95          | + |
| chr4 | 1584785 | 1584822 | CSAR_peak_4 | 6.02          | + |
| chr4 | 1584852 | 1584909 | CSAR_peak_4 | 9.03,11.63    | + |
| chr4 | 1585124 | 1585148 | CSAR_peak_4 | 7.27          | + |

|      |         |         |             |                  |   |
|------|---------|---------|-------------|------------------|---|
| chr4 | 1939664 | 1939714 | CSAR_peak_4 | 8.65             | + |
| chr4 | 1939882 | 1939927 | CSAR_peak_4 | 7.34,7.58        | + |
| chr4 | 1940826 | 1940932 | CSAR_peak_4 | 13.44            | + |
| chr4 | 1941002 | 1941060 | CSAR_peak_4 | 16.33            | + |
| chr4 | 1941566 | 1941599 | CSAR_peak_4 | 9.77,14.88       | + |
| chr4 | 1941850 | 1941883 | CSAR_peak_4 | 7.58             | + |
| chr4 | 1941909 | 1941966 | CSAR_peak_4 | 13               | + |
| chr4 | 1942123 | 1942157 | CSAR_peak_4 | 8.39             | + |
| chr4 | 1942227 | 1942289 | CSAR_peak_4 | 8.39             | + |
| chr4 | 1942296 | 1942347 | CSAR_peak_4 | 6.31,11.06       | + |
| chr4 | 1942699 | 1942770 | CSAR_peak_4 | 7.92             | + |
| chr4 | 2123187 | 2123243 | CSAR_peak_4 | 9.27             | + |
| chr4 | 2123436 | 2123554 | CSAR_peak_4 | 9.58,13.48,17.14 | + |
| chr4 | 2123871 | 2123937 | CSAR_peak_4 | 8.3              | + |
| chr4 | 2124092 | 2124211 | CSAR_peak_4 | 10.33,6.84       | + |
| chr4 | 2124212 | 2124240 | CSAR_peak_4 | 6.57             | + |
| chr4 | 2124247 | 2124342 | CSAR_peak_4 | 5.62,11.06       | + |
| chr4 | 2124524 | 2124699 | CSAR_peak_4 | 19.36,6.54,17.14 | + |
| chr4 | 2124701 | 2124795 | CSAR_peak_4 | 16.08,7.29,6.57  | + |
| chr4 | 2124817 | 2124846 | CSAR_peak_4 | 7.27             | + |
| chr4 | 2124957 | 2125037 | CSAR_peak_4 | 12.31            | + |
| chr4 | 2125104 | 2125182 | CSAR_peak_4 | 23.03,13.44      | + |
| chr4 | 2125599 | 2125671 | CSAR_peak_4 | 7.27             | + |
| chr4 | 2125799 | 2125839 | CSAR_peak_4 | 16.33            | + |
| chr4 | 2125910 | 2125991 | CSAR_peak_4 | 8.65             | + |
| chr4 | 2126021 | 2126034 | CSAR_peak_4 | 7.27             | + |
| chr4 | 2126188 | 2126254 | CSAR_peak_4 | 17.82            | + |
| chr4 | 2126400 | 2126460 | CSAR_peak_4 | 11.96,10.94      | + |
| chr4 | 2126500 | 2126595 | CSAR_peak_4 | 11.99,25.91      | + |
| chr4 | 2127082 | 2127138 | CSAR_peak_4 | 10.83            | + |
| chr4 | 2128404 | 2128473 | CSAR_peak_4 | 6.21             | + |
| chr4 | 2128828 | 2128859 | CSAR_peak_4 | 7.58             | + |
| chr4 | 2128950 | 2129007 | CSAR_peak_4 | 11.14,6.21,7.27  | + |
| chr4 | 2129281 | 2129336 | CSAR_peak_4 | 10.83            | + |
| chr4 | 2129687 | 2129784 | CSAR_peak_4 | 6.45,5.62        | + |
| chr4 | 2129813 | 2129890 | CSAR_peak_4 | 13.48,11.14      | + |
| chr4 | 2130135 | 2130191 | CSAR_peak_4 | 10.95            | + |
| chr4 | 2130592 | 2130630 | CSAR_peak_4 | 8.95             | + |
| chr4 | 2131271 | 2131325 | CSAR_peak_4 | 10.83            | + |
| chr4 | 2131752 | 2131821 | CSAR_peak_4 | 10.83            | + |
| chr4 | 2132066 | 2132079 | CSAR_peak_4 | 6.21             | + |
| chr4 | 2132160 | 2132184 | CSAR_peak_4 | 10.83            | + |

|      |         |         |             |               |   |
|------|---------|---------|-------------|---------------|---|
| chr4 | 2181360 | 2181396 | CSAR_peak_4 | 6.57          | + |
| chr4 | 2181461 | 2181526 | CSAR_peak_4 | 8.39,7.73     | + |
| chr4 | 2181642 | 2181726 | CSAR_peak_4 | 10.94,13.51   | + |
| chr4 | 2184236 | 2184296 | CSAR_peak_4 | 8.65          | + |
| chr4 | 2184558 | 2184665 | CSAR_peak_4 | 20.43,6.95    | + |
| chr4 | 2185044 | 2185104 | CSAR_peak_4 | 8.39,10.83    | + |
| chr4 | 2185447 | 2185497 | CSAR_peak_4 | 5.62          | + |
| chr4 | 2186619 | 2186689 | CSAR_peak_4 | 7.27          | + |
| chr4 | 2186989 | 2187028 | CSAR_peak_4 | 6.57          | + |
| chr4 | 2188122 | 2188259 | CSAR_peak_4 | 6.21,8.39,5.6 | + |
| chr4 | 2188342 | 2188392 | CSAR_peak_4 | 7.27          | + |
| chr4 | 2188468 | 2188519 | CSAR_peak_4 | 8.39          | + |
| chr4 | 2188938 | 2189010 | CSAR_peak_4 | 9.58          | + |
| chr4 | 2189564 | 2189634 | CSAR_peak_4 | 17.37,8.39    | + |
| chr4 | 2189788 | 2189840 | CSAR_peak_4 | 9.27          | + |
| chr4 | 2191672 | 2191731 | CSAR_peak_4 | 6.95          | + |
| chr4 | 2191837 | 2191910 | CSAR_peak_4 | 8.39,9.77     | + |
| chr4 | 2192418 | 2192456 | CSAR_peak_4 | 6.57          | + |
| chr4 | 2192967 | 2193103 | CSAR_peak_4 | 8.39,9.03     | + |
| chr4 | 2193362 | 2193506 | CSAR_peak_4 | 7.27,12.13    | + |
| chr4 | 2193599 | 2193656 | CSAR_peak_4 | 8.65          | + |
| chr4 | 2194369 | 2194432 | CSAR_peak_4 | 9.58          | + |
| chr4 | 2195284 | 2195378 | CSAR_peak_4 | 6.21,6.57     | + |
| chr4 | 2196615 | 2196674 | CSAR_peak_4 | 5.62,6.21     | + |
| chr4 | 2197153 | 2197202 | CSAR_peak_4 | 6.21          | + |
| chr4 | 2197269 | 2197384 | CSAR_peak_4 | 8.65,7.27,17. | + |
| chr4 | 2291323 | 2291363 | CSAR_peak_4 | 7.58          | + |
| chr4 | 2291445 | 2291502 | CSAR_peak_4 | 11.38         | + |
| chr4 | 2291850 | 2291893 | CSAR_peak_4 | 6.57          | + |
| chr4 | 2291939 | 2291984 | CSAR_peak_4 | 8.65,20.13    | + |
| chr4 | 2292081 | 2292111 | CSAR_peak_4 | 16.33         | + |
| chr4 | 2446444 | 2446522 | CSAR_peak_4 | 25.62         | + |
| chr4 | 2446569 | 2446604 | CSAR_peak_4 | 6.21          | + |
| chr4 | 2446708 | 2446737 | CSAR_peak_4 | 6.57          | + |
| chr4 | 2498116 | 2498168 | CSAR_peak_4 | 6.21          | + |
| chr4 | 2504145 | 2504185 | CSAR_peak_4 | 8.39          | + |
| chr4 | 2539957 | 2540019 | CSAR_peak_4 | 5.62,6.21     | + |
| chr4 | 2567761 | 2567815 | CSAR_peak_4 | 6.21          | + |
| chr4 | 2573231 | 2573278 | CSAR_peak_4 | 7.34          | + |
| chr4 | 2573438 | 2573502 | CSAR_peak_4 | 8.39,6.57     | + |
| chr4 | 2573760 | 2573764 | CSAR_peak_4 | 6.21          | + |
| chr4 | 2573766 | 2573806 | CSAR_peak_4 | 36.78,5.95    | + |

|      |         |         |             |                 |   |
|------|---------|---------|-------------|-----------------|---|
| chr4 | 2573936 | 2574065 | CSAR_peak_1 | 16.54,6.44      | + |
| chr4 | 2574328 | 2574378 | CSAR_peak_1 | 6.85            | + |
| chr4 | 2574400 | 2574433 | CSAR_peak_1 | 7.34            | + |
| chr4 | 2574493 | 2574545 | CSAR_peak_1 | 8.39,5.62       | + |
| chr4 | 2574641 | 2574722 | CSAR_peak_1 | 6.1,11.14       | + |
| chr4 | 2574967 | 2575018 | CSAR_peak_1 | 6.21            | + |
| chr4 | 2575260 | 2575333 | CSAR_peak_1 | 6.95,9.77       | + |
| chr4 | 2575993 | 2576024 | CSAR_peak_1 | 8.39            | + |
| chr4 | 2576399 | 2576438 | CSAR_peak_1 | 8.39            | + |
| chr4 | 2660464 | 2660573 | CSAR_peak_1 | 6.02,17.68      | + |
| chr4 | 2660956 | 2661001 | CSAR_peak_1 | 8.39            | + |
| chr4 | 2661410 | 2661688 | CSAR_peak_1 | 11.07,7.36,10.1 | + |
| chr4 | 2661722 | 2661779 | CSAR_peak_1 | 12.5            | + |
| chr4 | 2718232 | 2718278 | CSAR_peak_1 | 14.61,7.13,2.1  | + |
| chr4 | 2718429 | 2718692 | CSAR_peak_1 | 15.28,34.16,1.1 | + |
| chr4 | 2718873 | 2718957 | CSAR_peak_1 | 12.8,11.69      | + |
| chr4 | 2719043 | 2719057 | CSAR_peak_1 | 5.94            | + |
| chr4 | 2719064 | 2719213 | CSAR_peak_1 | 20.13,6.21,7.1  | + |
| chr4 | 2719269 | 2719423 | CSAR_peak_1 | 6.21,9.58       | + |
| chr4 | 2719428 | 2719463 | CSAR_peak_1 | 6.37            | + |
| chr4 | 2719498 | 2719553 | CSAR_peak_1 | 6.14            | + |
| chr4 | 2719655 | 2719695 | CSAR_peak_1 | 8.39            | + |
| chr4 | 2719704 | 2719804 | CSAR_peak_1 | 9.66,7.31       | + |
| chr4 | 2719845 | 2720024 | CSAR_peak_1 | 5.9,33.31,26.1  | + |
| chr4 | 2720269 | 2720331 | CSAR_peak_1 | 8.39            | + |
| chr4 | 2752102 | 2752151 | CSAR_peak_1 | 6.21            | + |
| chr4 | 3055262 | 3055312 | CSAR_peak_1 | 5.67            | + |
| chr4 | 3055720 | 3055804 | CSAR_peak_1 | 18.2,7.61,14.1  | + |
| chr4 | 3056215 | 3056303 | CSAR_peak_1 | 8.65,6.18       | + |
| chr4 | 3061167 | 3061208 | CSAR_peak_1 | 19.05,23.71     | + |
| chr4 | 3061209 | 3061255 | CSAR_peak_1 | 69.28           | + |
| chr4 | 4197214 | 4197286 | CSAR_peak_1 | 9.58            | + |
| chr4 | 4867014 | 4867083 | CSAR_peak_1 | 10.83,13        | + |
| chr4 | 4867121 | 4867188 | CSAR_peak_1 | 6.03,12.13      | + |
| chr4 | 4867719 | 4867801 | CSAR_peak_1 | 23.83,8.65,6.1  | + |
| chr4 | 5171022 | 5171119 | CSAR_peak_1 | 12.13,6.57      | + |
| chr4 | 5172995 | 5173089 | CSAR_peak_1 | 13.09,12.6      | + |
| chr4 | 5173190 | 5173232 | CSAR_peak_1 | 13.64,14.08     | + |
| chr4 | 5173266 | 5173299 | CSAR_peak_1 | 5.62            | + |
| chr4 | 5239438 | 5239499 | CSAR_peak_1 | 9.77            | + |
| chr4 | 5253614 | 5253664 | CSAR_peak_1 | 6.21            | + |
| chr4 | 5286346 | 5286402 | CSAR_peak_1 | 12.13           | + |

|      |         |         |             |               |   |
|------|---------|---------|-------------|---------------|---|
| chr4 | 5287563 | 5287620 | CSAR_peak_4 | 7.27          | + |
| chr4 | 5289303 | 5289347 | CSAR_peak_4 | 7.92          | + |
| chr4 | 5290865 | 5290922 | CSAR_peak_4 | 7.27          | + |
| chr4 | 5291585 | 5291631 | CSAR_peak_4 | 7.58          | + |
| chr4 | 5316220 | 5316290 | CSAR_peak_4 | 15.43,9.97    | + |
| chr4 | 5316394 | 5316427 | CSAR_peak_4 | 5.79          | + |
| chr4 | 5317185 | 5317243 | CSAR_peak_4 | 7.27          | + |
| chr4 | 5434343 | 5434393 | CSAR_peak_4 | 8.39          | + |
| chr4 | 5724226 | 5724261 | CSAR_peak_4 | 7.27          | + |
| chr4 | 5724704 | 5724754 | CSAR_peak_4 | 10.95         | + |
| chr4 | 5725089 | 5725125 | CSAR_peak_4 | 6.03          | + |
| chr4 | 5725502 | 5725588 | CSAR_peak_4 | 6.1           | + |
| chr4 | 5726327 | 5726438 | CSAR_peak_4 | 19.36         | + |
| chr4 | 5726504 | 5726561 | CSAR_peak_4 | 8.28          | + |
| chr4 | 5759102 | 5759160 | CSAR_peak_4 | 10.83         | + |
| chr4 | 5759908 | 5759954 | CSAR_peak_4 | 6.21          | + |
| chr4 | 5775385 | 5775449 | CSAR_peak_4 | 6.44          | + |
| chr4 | 5775479 | 5775544 | CSAR_peak_4 | 6.44          | + |
| chr4 | 5775750 | 5775879 | CSAR_peak_4 | 13.85,9.97    | + |
| chr4 | 5775943 | 5776048 | CSAR_peak_4 | 7.27,8.39     | + |
| chr4 | 5776062 | 5776079 | CSAR_peak_4 | 11.96         | + |
| chr4 | 5776170 | 5776194 | CSAR_peak_4 | 9.41          | + |
| chr4 | 5776226 | 5776353 | CSAR_peak_4 | 14.88,7.92,1! | + |
| chr4 | 5777865 | 5777936 | CSAR_peak_4 | 10.83         | + |
| chr4 | 5778062 | 5778142 | CSAR_peak_4 | 8.39,6.21     | + |
| chr4 | 5778190 | 5778246 | CSAR_peak_4 | 6.21          | + |
| chr4 | 5778927 | 5778977 | CSAR_peak_4 | 6.57          | + |
| chr4 | 5788032 | 5788081 | CSAR_peak_4 | 7.58          | + |
| chr4 | 5829039 | 5829082 | CSAR_peak_4 | 8.28          | + |
| chr4 | 5829276 | 5829364 | CSAR_peak_4 | 6.03          | + |
| chr4 | 5829485 | 5829638 | CSAR_peak_4 | 17.37,14.76   | + |
| chr4 | 5831060 | 5831195 | CSAR_peak_4 | 8.39,7.58,8.3 | + |
| chr4 | 5831773 | 5831835 | CSAR_peak_4 | 10.83         | + |
| chr4 | 6051119 | 6051164 | CSAR_peak_4 | 6.57          | + |
| chr4 | 6084720 | 6084781 | CSAR_peak_4 | 8.39          | + |
| chr4 | 6122182 | 6122228 | CSAR_peak_4 | 8.39          | + |
| chr4 | 6134559 | 6134595 | CSAR_peak_4 | 6.57          | + |
| chr4 | 6134893 | 6134956 | CSAR_peak_4 | 10.83         | + |
| chr4 | 6277467 | 6277499 | CSAR_peak_4 | 6.57          | + |
| chr4 | 6291859 | 6291889 | CSAR_peak_4 | 7.92          | + |
| chr4 | 6294390 | 6294444 | CSAR_peak_4 | 8.39          | + |
| chr4 | 6294495 | 6294510 | CSAR_peak_4 | 7.27          | + |

|      |         |         |                             |   |
|------|---------|---------|-----------------------------|---|
| chr4 | 6294593 | 6294741 | CSAR_peak_14.88,11.38,11.38 | + |
| chr4 | 6294976 | 6295019 | CSAR_peak_7.27              | + |
| chr4 | 6408288 | 6408330 | CSAR_peak_6.21              | + |
| chr4 | 6408642 | 6408698 | CSAR_peak_10.17             | + |
| chr4 | 6409097 | 6409150 | CSAR_peak_7.26              | + |
| chr4 | 6557915 | 6557962 | CSAR_peak_7.73              | + |
| chr4 | 6558068 | 6558114 | CSAR_peak_10.02             | + |
| chr4 | 6558555 | 6558602 | CSAR_peak_6.1,6.57          | + |
| chr4 | 6657521 | 6657572 | CSAR_peak_8.65              | + |
| chr4 | 6657752 | 6657880 | CSAR_peak_8.39,6.64         | + |
| chr4 | 6657969 | 6658021 | CSAR_peak_16.33,7.78        | + |
| chr4 | 6662556 | 6662639 | CSAR_peak_6.57,8.95         | + |
| chr4 | 6764177 | 6764292 | CSAR_peak_45.53,45.14,45.14 | + |
| chr4 | 6772460 | 6772534 | CSAR_peak_9.58,5.62         | + |
| chr4 | 6774499 | 6774555 | CSAR_peak_10.83             | + |
| chr4 | 6774879 | 6774971 | CSAR_peak_7.27              | + |
| chr4 | 6800152 | 6800193 | CSAR_peak_12.13,7.27        | + |
| chr4 | 6800308 | 6800322 | CSAR_peak_7.27              | + |
| chr4 | 6800358 | 6800409 | CSAR_peak_7.34              | + |
| chr4 | 6801504 | 6801551 | CSAR_peak_10.83             | + |
| chr4 | 6805582 | 6805632 | CSAR_peak_6.21              | + |
| chr4 | 6805758 | 6805829 | CSAR_peak_6.95              | + |
| chr4 | 6864164 | 6864228 | CSAR_peak_17.68             | + |
| chr4 | 6864249 | 6864371 | CSAR_peak_16.36,19.98,19.98 | + |
| chr4 | 6864413 | 6864438 | CSAR_peak_8.95              | + |
| chr4 | 6864491 | 6864726 | CSAR_peak_24.64,12.98,12.98 | + |
| chr4 | 6864748 | 6864934 | CSAR_peak_18.73,6.11,20.18  | + |
| chr4 | 6864949 | 6865041 | CSAR_peak_20.18,13.01       | + |
| chr4 | 6865066 | 6865123 | CSAR_peak_6.42,6.37         | + |
| chr4 | 6865127 | 6865293 | CSAR_peak_15.76,31.73       | + |
| chr4 | 6865314 | 6865367 | CSAR_peak_6.57              | + |
| chr4 | 6865458 | 6865504 | CSAR_peak_6.87              | + |
| chr4 | 6865543 | 6865611 | CSAR_peak_6.42,7.47         | + |
| chr4 | 6865615 | 6865728 | CSAR_peak_13.48             | + |
| chr4 | 6865752 | 6865849 | CSAR_peak_7.95,5.79         | + |
| chr4 | 6866063 | 6866111 | CSAR_peak_6.95,10.83        | + |
| chr4 | 6884606 | 6884650 | CSAR_peak_6.21              | + |
| chr4 | 6887469 | 6887583 | CSAR_peak_13.6              | + |
| chr4 | 6887646 | 6887697 | CSAR_peak_10.02             | + |
| chr4 | 6887767 | 6887832 | CSAR_peak_23.18,8.3         | + |
| chr4 | 6887946 | 6888003 | CSAR_peak_6.21,9.61         | + |
| chr4 | 6888009 | 6888092 | CSAR_peak_21.22             | + |

|      |         |         |            |                 |   |
|------|---------|---------|------------|-----------------|---|
| chr4 | 6888130 | 6888207 | CSAR_peak_ | 13.76,7.2       | + |
| chr4 | 6888309 | 6888419 | CSAR_peak_ | 18.09,9.77,1.1  | + |
| chr4 | 6888437 | 6888489 | CSAR_peak_ | 13.56,10.28     | + |
| chr4 | 6888575 | 6888628 | CSAR_peak_ | 11.12,7.87      | + |
| chr4 | 6888776 | 6888958 | CSAR_peak_ | 17.01,19.25,1.1 | + |
| chr4 | 6888977 | 6889087 | CSAR_peak_ | 12.74,30.02     | + |
| chr4 | 6889112 | 6889167 | CSAR_peak_ | 6.21            | + |
| chr4 | 6889396 | 6889491 | CSAR_peak_ | 31.72,12.17,1.1 | + |
| chr4 | 6889509 | 6889567 | CSAR_peak_ | 9.58,21.22      | + |
| chr4 | 6889597 | 6889695 | CSAR_peak_ | 9.27,6.21       | + |
| chr4 | 6889786 | 6889849 | CSAR_peak_ | 10.02,8.65      | + |
| chr4 | 6892643 | 6892700 | CSAR_peak_ | 15.2            | + |
| chr4 | 6892770 | 6892808 | CSAR_peak_ | 12.13           | + |
| chr4 | 6893413 | 6893484 | CSAR_peak_ | 6.21,7.27       | + |
| chr4 | 7072446 | 7072480 | CSAR_peak_ | 7.27            | + |
| chr4 | 7090426 | 7090477 | CSAR_peak_ | 6.21            | + |
| chr4 | 7204701 | 7204749 | CSAR_peak_ | 8.39            | + |
| chr4 | 7207117 | 7207181 | CSAR_peak_ | 8.39            | + |
| chr4 | 7207953 | 7208016 | CSAR_peak_ | 13.48           | + |
| chr4 | 7208087 | 7208123 | CSAR_peak_ | 12.13           | + |
| chr4 | 7208346 | 7208401 | CSAR_peak_ | 8.39            | + |
| chr4 | 7211213 | 7211261 | CSAR_peak_ | 9.58            | + |
| chr4 | 7211356 | 7211418 | CSAR_peak_ | 17.51           | + |
| chr4 | 7211699 | 7211750 | CSAR_peak_ | 10.95           | + |
| chr4 | 7212058 | 7212138 | CSAR_peak_ | 8.39,9.77,7.2   | + |
| chr4 | 7212473 | 7212515 | CSAR_peak_ | 6.57            | + |
| chr4 | 7214838 | 7214903 | CSAR_peak_ | 16.11           | + |
| chr4 | 7215542 | 7215598 | CSAR_peak_ | 7.27            | + |
| chr4 | 7215610 | 7215668 | CSAR_peak_ | 6.1             | + |
| chr4 | 7215670 | 7215699 | CSAR_peak_ | 7.27            | + |
| chr4 | 7215790 | 7215877 | CSAR_peak_ | 8.28,6.21       | + |
| chr4 | 7216201 | 7216310 | CSAR_peak_ | 6.21,16.05      | + |
| chr4 | 7216333 | 7216375 | CSAR_peak_ | 6.03            | + |
| chr4 | 7216396 | 7216457 | CSAR_peak_ | 7.27            | + |
| chr4 | 7234312 | 7234365 | CSAR_peak_ | 8.39            | + |
| chr4 | 7239708 | 7239750 | CSAR_peak_ | 6.03            | + |
| chr4 | 7391649 | 7391717 | CSAR_peak_ | 10.95,6.1       | + |
| chr4 | 7392887 | 7392909 | CSAR_peak_ | 6.44            | + |
| chr4 | 7393539 | 7393585 | CSAR_peak_ | 7.27            | + |
| chr4 | 7394139 | 7394177 | CSAR_peak_ | 8.65,6.95,10.1  | + |
| chr4 | 7395342 | 7395396 | CSAR_peak_ | 7.27            | + |
| chr4 | 7395644 | 7395714 | CSAR_peak_ | 10.95           | + |



|      |         |         |            |               |   |
|------|---------|---------|------------|---------------|---|
| chr4 | 7395717 | 7395789 | CSAR_peak_ | 18.73,9.27    | + |
| chr4 | 7442201 | 7442403 | CSAR_peak_ | 22.56,7.27    | + |
| chr4 | 7442500 | 7442685 | CSAR_peak_ | 13.66,19.93,  | + |
| chr4 | 7442687 | 7442764 | CSAR_peak_ | 8.65          | + |
| chr4 | 7442822 | 7442890 | CSAR_peak_ | 12.13         | + |
| chr4 | 7442939 | 7443017 | CSAR_peak_ | 7.73,10.83    | + |
| chr4 | 7448453 | 7448473 | CSAR_peak_ | 6.57          | + |
| chr4 | 7455052 | 7455108 | CSAR_peak_ | 7.27          | + |
| chr4 | 7456750 | 7456814 | CSAR_peak_ | 6.21          | + |
| chr4 | 7473695 | 7473745 | CSAR_peak_ | 7.92          | + |
| chr4 | 7473887 | 7473937 | CSAR_peak_ | 7.27,8.95     | + |
| chr4 | 7487736 | 7487797 | CSAR_peak_ | 8.39          | + |
| chr4 | 7487938 | 7488043 | CSAR_peak_ | 14.76,8.39,6. | + |
| chr4 | 7488411 | 7488446 | CSAR_peak_ | 13.51         | + |
| chr4 | 7488854 | 7488904 | CSAR_peak_ | 13.85         | + |
| chr4 | 7489181 | 7489237 | CSAR_peak_ | 10.83         | + |
| chr4 | 7515012 | 7515029 | CSAR_peak_ | 6.21          | + |
| chr4 | 7515593 | 7515661 | CSAR_peak_ | 5.79,7.73     | + |
| chr4 | 7521437 | 7521500 | CSAR_peak_ | 14.73,9.77    | + |
| chr4 | 7522303 | 7522369 | CSAR_peak_ | 6.11          | + |
| chr4 | 7601097 | 7601144 | CSAR_peak_ | 6.21          | + |
| chr4 | 7603914 | 7603955 | CSAR_peak_ | 6.21          | + |
| chr4 | 7604647 | 7604681 | CSAR_peak_ | 6.02          | + |
| chr4 | 7605386 | 7605425 | CSAR_peak_ | 12.13         | + |
| chr4 | 7605430 | 7605476 | CSAR_peak_ | 10.95         | + |
| chr4 | 7605760 | 7605818 | CSAR_peak_ | 9.77          | + |
| chr4 | 7608021 | 7608084 | CSAR_peak_ | 6.21          | + |
| chr4 | 7615113 | 7615143 | CSAR_peak_ | 6.21          | + |
| chr4 | 7615216 | 7615268 | CSAR_peak_ | 8.65          | + |
| chr4 | 7683786 | 7683817 | CSAR_peak_ | 16.87         | + |
| chr4 | 7683841 | 7683893 | CSAR_peak_ | 25.49,11.34   | + |
| chr4 | 7683937 | 7684021 | CSAR_peak_ | 17.51,31.41,  | + |
| chr4 | 7684060 | 7684147 | CSAR_peak_ | 27.22,11.43   | + |
| chr4 | 7759444 | 7759497 | CSAR_peak_ | 6.21          | + |
| chr4 | 7759534 | 7759565 | CSAR_peak_ | 6.21          | + |
| chr4 | 7760886 | 7760954 | CSAR_peak_ | 11.38         | + |
| chr4 | 7842972 | 7843450 | CSAR_peak_ | 14.76,9.77,6. | + |
| chr4 | 7843545 | 7843626 | CSAR_peak_ | 21.66,13.03   | + |
| chr4 | 7844242 | 7844298 | CSAR_peak_ | 10.95,13.66   | + |
| chr4 | 7844512 | 7844588 | CSAR_peak_ | 36.24,35.28   | + |
| chr4 | 7844594 | 7844665 | CSAR_peak_ | 52.17,27.96   | + |
| chr4 | 7844783 | 7844837 | CSAR_peak_ | 9.77,6.21     | + |

|      |         |         |             |               |   |
|------|---------|---------|-------------|---------------|---|
| chr4 | 7844985 | 7845025 | CSAR_peak_4 | 8.39,6.03     | + |
| chr4 | 7845210 | 7845448 | CSAR_peak_4 | 12.13,10.95,  | + |
| chr4 | 7846264 | 7846391 | CSAR_peak_4 | 9.27,14.36    | + |
| chr4 | 7846399 | 7846549 | CSAR_peak_4 | 13.51,23.03   | + |
| chr4 | 7846776 | 7846875 | CSAR_peak_4 | 33.75,54.19   | + |
| chr4 | 7866798 | 7866869 | CSAR_peak_4 | 16.11,6.95    | + |
| chr4 | 7867165 | 7867190 | CSAR_peak_4 | 6.21          | + |
| chr4 | 7924645 | 7924699 | CSAR_peak_4 | 6.21          | + |
| chr4 | 7924710 | 7924768 | CSAR_peak_4 | 7.92,8.65     | + |
| chr4 | 7949617 | 7949658 | CSAR_peak_4 | 5.62          | + |
| chr4 | 7950195 | 7950241 | CSAR_peak_4 | 6.21          | + |
| chr4 | 7950534 | 7950592 | CSAR_peak_4 | 7.58          | + |
| chr4 | 8012322 | 8012368 | CSAR_peak_4 | 7.27          | + |
| chr4 | 8012408 | 8012461 | CSAR_peak_4 | 12.31         | + |
| chr4 | 8012496 | 8012539 | CSAR_peak_4 | 7.27          | + |
| chr4 | 8055982 | 8056031 | CSAR_peak_4 | 6.57          | + |
| chr4 | 8056254 | 8056275 | CSAR_peak_4 | 7.27          | + |
| chr4 | 8056299 | 8056323 | CSAR_peak_4 | 8.39          | + |
| chr4 | 8056540 | 8056593 | CSAR_peak_4 | 6.21          | + |
| chr4 | 8170005 | 8170044 | CSAR_peak_4 | 6.21          | + |
| chr4 | 8218626 | 8218669 | CSAR_peak_4 | 6.21          | + |
| chr4 | 8334553 | 8334623 | CSAR_peak_4 | 7.27,6.57     | + |
| chr4 | 8334716 | 8334790 | CSAR_peak_4 | 8.19,6.65,5.6 | + |
| chr4 | 8335008 | 8335121 | CSAR_peak_4 | 11.45,7.11,1. | + |
| chr4 | 8335203 | 8335328 | CSAR_peak_4 | 6.21,7.27,6.2 | + |
| chr4 | 8335502 | 8335559 | CSAR_peak_4 | 12.17         | + |
| chr4 | 8335692 | 8335766 | CSAR_peak_4 | 9.13,6.02,6.2 | + |
| chr4 | 8335825 | 8335924 | CSAR_peak_4 | 8.39,12.74,8. | + |
| chr4 | 8336034 | 8336078 | CSAR_peak_4 | 8.39          | + |
| chr4 | 8336371 | 8336464 | CSAR_peak_4 | 19.96,7.58,9. | + |
| chr4 | 8336476 | 8336519 | CSAR_peak_4 | 6.1           | + |
| chr4 | 8336593 | 8336636 | CSAR_peak_4 | 13            | + |
| chr4 | 8336657 | 8336858 | CSAR_peak_4 | 7.27,13.48,1. | + |
| chr4 | 8337610 | 8337708 | CSAR_peak_4 | 6.21          | + |
| chr4 | 8340903 | 8341001 | CSAR_peak_4 | 25.91,10.95   | + |
| chr4 | 8341153 | 8341191 | CSAR_peak_4 | 7.58          | + |
| chr4 | 8459903 | 8459993 | CSAR_peak_4 | 22.98,34.19   | + |
| chr4 | 8460056 | 8460121 | CSAR_peak_4 | 17.42,19.37,  | + |
| chr4 | 8460221 | 8460347 | CSAR_peak_4 | 74.04,74.61,  | + |
| chr4 | 8475643 | 8475714 | CSAR_peak_4 | 8.39,7.27     | + |
| chr4 | 8479131 | 8479209 | CSAR_peak_4 | 5.62,7.92     | + |
| chr4 | 8530233 | 8530337 | CSAR_peak_4 | 9.13,22.56    | + |

|      |         |         |            |               |   |
|------|---------|---------|------------|---------------|---|
| chr4 | 8540476 | 8540573 | CSAR_peak_ | 6.21,9.58     | + |
| chr4 | 8540671 | 8540690 | CSAR_peak_ | 8.39,6.95     | + |
| chr4 | 8579152 | 8579201 | CSAR_peak_ | 8.39          | + |
| chr4 | 8579280 | 8579420 | CSAR_peak_ | 8.46,38.2,53. | + |
| chr4 | 8579566 | 8579622 | CSAR_peak_ | 20.94         | + |
| chr4 | 8638075 | 8638135 | CSAR_peak_ | 10.33         | + |
| chr4 | 8652523 | 8652564 | CSAR_peak_ | 6.02          | + |
| chr4 | 8652767 | 8652905 | CSAR_peak_ | 8.95,6.21,8.6 | + |
| chr4 | 8653535 | 8653563 | CSAR_peak_ | 16.33         | + |
| chr4 | 8654275 | 8654327 | CSAR_peak_ | 12.74,11.14   | + |
| chr4 | 8654486 | 8654560 | CSAR_peak_ | 6.95,11.38,6. | + |
| chr4 | 8654962 | 8655013 | CSAR_peak_ | 6.21,6.1      | + |
| chr4 | 8656435 | 8656490 | CSAR_peak_ | 9.58          | + |
| chr4 | 8658759 | 8658804 | CSAR_peak_ | 10.83         | + |
| chr4 | 8660101 | 8660151 | CSAR_peak_ | 8.95,6.95     | + |
| chr4 | 8662008 | 8662073 | CSAR_peak_ | 8.65          | + |
| chr4 | 8681443 | 8681478 | CSAR_peak_ | 6.02          | + |
| chr4 | 8681569 | 8681616 | CSAR_peak_ | 9.77          | + |
| chr4 | 8681864 | 8681893 | CSAR_peak_ | 6.21          | + |
| chr4 | 8689359 | 8689399 | CSAR_peak_ | 8.39,7.92,6.5 | + |
| chr4 | 8805963 | 8806014 | CSAR_peak_ | 7.27          | + |
| chr4 | 8843625 | 8843820 | CSAR_peak_ | 16.05,9.77    | + |
| chr4 | 8844180 | 8844240 | CSAR_peak_ | 7.27,10.95    | + |
| chr4 | 8844671 | 8844730 | CSAR_peak_ | 7.58          | + |
| chr4 | 8844789 | 8844840 | CSAR_peak_ | 9.58          | + |
| chr4 | 8845583 | 8845634 | CSAR_peak_ | 6.21          | + |
| chr4 | 8848626 | 8848679 | CSAR_peak_ | 7.34          | + |
| chr4 | 8849972 | 8850062 | CSAR_peak_ | 7.73,13.48    | + |
| chr4 | 8874034 | 8874095 | CSAR_peak_ | 9.58          | + |
| chr4 | 8874539 | 8874581 | CSAR_peak_ | 6.21          | + |
| chr4 | 8876827 | 8876879 | CSAR_peak_ | 9.58,8.65     | + |
| chr4 | 8885121 | 8885167 | CSAR_peak_ | 6.1           | + |
| chr4 | 8886742 | 8886765 | CSAR_peak_ | 9.58          | + |
| chr4 | 8909755 | 8909824 | CSAR_peak_ | 8.65          | + |
| chr4 | 8909870 | 8909943 | CSAR_peak_ | 14.88         | + |
| chr4 | 8910234 | 8910262 | CSAR_peak_ | 9.77          | + |
| chr4 | 8910398 | 8910465 | CSAR_peak_ | 7.92,9.03     | + |
| chr4 | 8910764 | 8910833 | CSAR_peak_ | 10.83         | + |
| chr4 | 8985092 | 8985120 | CSAR_peak_ | 6.21          | + |
| chr4 | 9024944 | 9025006 | CSAR_peak_ | 7.27          | + |
| chr4 | 9025192 | 9025235 | CSAR_peak_ | 6.21          | + |
| chr4 | 9026766 | 9026814 | CSAR_peak_ | 10.83,14.88   | + |

|      |         |         |             |                  |   |
|------|---------|---------|-------------|------------------|---|
| chr4 | 9026928 | 9026932 | CSAR_peak_4 | 7.27             | + |
| chr4 | 9096362 | 9096427 | CSAR_peak_4 | 40.01,8.66,11.14 | + |
| chr4 | 9096479 | 9096534 | CSAR_peak_4 | 44.49,39.62      | + |
| chr4 | 9122726 | 9122771 | CSAR_peak_4 | 6.21             | + |
| chr4 | 9122850 | 9122897 | CSAR_peak_4 | 14.88,6.57       | + |
| chr4 | 9123295 | 9123360 | CSAR_peak_4 | 6.21             | + |
| chr4 | 9124467 | 9124515 | CSAR_peak_4 | 6.57             | + |
| chr4 | 9125267 | 9125277 | CSAR_peak_4 | 6.21             | + |
| chr4 | 9149629 | 9149699 | CSAR_peak_4 | 6.21             | + |
| chr4 | 9151746 | 9151795 | CSAR_peak_4 | 7.27             | + |
| chr4 | 9152077 | 9152206 | CSAR_peak_4 | 12.13,7.27       | + |
| chr4 | 9152210 | 9152259 | CSAR_peak_4 | 6.57             | + |
| chr4 | 9152354 | 9152467 | CSAR_peak_4 | 13.44,7.92       | + |
| chr4 | 9152813 | 9152871 | CSAR_peak_4 | 8.13             | + |
| chr4 | 9171915 | 9172006 | CSAR_peak_4 | 11.66,12.13      | + |
| chr4 | 9172150 | 9172207 | CSAR_peak_4 | 11.14,8.39       | + |
| chr4 | 9172275 | 9172348 | CSAR_peak_4 | 6.1,12.17        | + |
| chr4 | 9172488 | 9172519 | CSAR_peak_4 | 6.03             | + |
| chr4 | 9172705 | 9172752 | CSAR_peak_4 | 6.21             | + |
| chr4 | 9218759 | 9218854 | CSAR_peak_4 | 13.44,8.65       | + |
| chr4 | 9222699 | 9222749 | CSAR_peak_4 | 6.57             | + |
| chr4 | 9223223 | 9223275 | CSAR_peak_4 | 7.27             | + |
| chr4 | 9226599 | 9226674 | CSAR_peak_4 | 7.58,11.14       | + |
| chr4 | 9226703 | 9226780 | CSAR_peak_4 | 8.39,14.88,6.21  | + |
| chr4 | 9255095 | 9255136 | CSAR_peak_4 | 6.21             | + |
| chr4 | 9255256 | 9255309 | CSAR_peak_4 | 6.21,7.92        | + |
| chr4 | 9255472 | 9255560 | CSAR_peak_4 | 12.13            | + |
| chr4 | 9256031 | 9256093 | CSAR_peak_4 | 10.83,7.27       | + |
| chr4 | 9379722 | 9379753 | CSAR_peak_4 | 6.21             | + |
| chr4 | 9379830 | 9379885 | CSAR_peak_4 | 8.39             | + |
| chr4 | 9398805 | 9398862 | CSAR_peak_4 | 6.57             | + |
| chr4 | 9449559 | 9449650 | CSAR_peak_4 | 8.65,6.03        | + |
| chr4 | 9470927 | 9471000 | CSAR_peak_4 | 6.21,5.62        | + |
| chr4 | 9471149 | 9471268 | CSAR_peak_4 | 6.57,18.65       | + |
| chr4 | 9471350 | 9471412 | CSAR_peak_4 | 10.62,6.87       | + |
| chr4 | 9471552 | 9471646 | CSAR_peak_4 | 17.57            | + |
| chr4 | 9471746 | 9471753 | CSAR_peak_4 | 10.62            | + |
| chr4 | 9472171 | 9472218 | CSAR_peak_4 | 9.27             | + |
| chr4 | 9478380 | 9478423 | CSAR_peak_4 | 10.31            | + |
| chr4 | 9478496 | 9478562 | CSAR_peak_4 | 6.21             | + |
| chr4 | 9478935 | 9479001 | CSAR_peak_4 | 8.28,10.02       | + |
| chr4 | 9560235 | 9560296 | CSAR_peak_4 | 10.83            | + |

|      |         |         |            |               |   |
|------|---------|---------|------------|---------------|---|
| chr4 | 9560473 | 9560613 | CSAR_peak_ | 9.58,15.82,6. | + |
| chr4 | 9560651 | 9560714 | CSAR_peak_ | 13.51         | + |
| chr4 | 9560760 | 9560813 | CSAR_peak_ | 12.13,6.21    | + |
| chr4 | 9560842 | 9560906 | CSAR_peak_ | 8.99,7.31     | + |
| chr4 | 9561047 | 9561130 | CSAR_peak_ | 14.76         | + |
| chr4 | 9561315 | 9561385 | CSAR_peak_ | 23.03         | + |
| chr4 | 9561465 | 9561488 | CSAR_peak_ | 6.87          | + |
| chr4 | 9561497 | 9561611 | CSAR_peak_ | 9.58,6.45,8.3 | + |
| chr4 | 9561725 | 9561761 | CSAR_peak_ | 7.27          | + |
| chr4 | 9561805 | 9561918 | CSAR_peak_ | 19.36,13.09,  | + |
| chr4 | 9562015 | 9562124 | CSAR_peak_ | 24.15,6.13,1  | + |
| chr4 | 9562190 | 9562270 | CSAR_peak_ | 7.58,7.13,9.3 | + |
| chr4 | 9562303 | 9562373 | CSAR_peak_ | 8.02,9.84     | + |
| chr4 | 9562655 | 9562880 | CSAR_peak_ | 6.72,19.36,1  | + |
| chr4 | 9562933 | 9563109 | CSAR_peak_ | 21.1,6.85,10. | + |
| chr4 | 9563129 | 9563196 | CSAR_peak_ | 23            | + |
| chr4 | 9564534 | 9564662 | CSAR_peak_ | 16.77,21.56   | + |
| chr4 | 9564692 | 9564763 | CSAR_peak_ | 10.52         | + |
| chr4 | 9564798 | 9564824 | CSAR_peak_ | 7.73          | + |
| chr4 | 9564859 | 9564942 | CSAR_peak_ | 16            | + |
| chr4 | 9565063 | 9565107 | CSAR_peak_ | 18.2          | + |
| chr4 | 9565133 | 9565208 | CSAR_peak_ | 14.34,10.95   | + |
| chr4 | 9565475 | 9565519 | CSAR_peak_ | 6.95          | + |
| chr4 | 9602614 | 9602678 | CSAR_peak_ | 9.27          | + |
| chr4 | 9603253 | 9603296 | CSAR_peak_ | 8.39          | + |
| chr4 | 9603327 | 9603394 | CSAR_peak_ | 8.95          | + |
| chr4 | 9638785 | 9638814 | CSAR_peak_ | 8.65          | + |
| chr4 | 9639347 | 9639427 | CSAR_peak_ | 8.39          | + |
| chr4 | 9641006 | 9641063 | CSAR_peak_ | 14.88         | + |
| chr4 | 9641279 | 9641348 | CSAR_peak_ | 8.52,16.19    | + |
| chr4 | 9641430 | 9641483 | CSAR_peak_ | 6.44          | + |
| chr4 | 9676299 | 9676349 | CSAR_peak_ | 6.57          | + |
| chr4 | 9676504 | 9676535 | CSAR_peak_ | 12.17         | + |
| chr4 | 9676624 | 9676699 | CSAR_peak_ | 13.51,7.27    | + |
| chr4 | 9677168 | 9677208 | CSAR_peak_ | 6.95,8.65     | + |
| chr4 | 9677326 | 9677363 | CSAR_peak_ | 12.13         | + |
| chr4 | 9677856 | 9677906 | CSAR_peak_ | 6.85          | + |
| chr4 | 9678328 | 9678386 | CSAR_peak_ | 18.95,10.02,  | + |
| chr4 | 9684323 | 9684379 | CSAR_peak_ | 10.95         | + |
| chr4 | 9717025 | 9717082 | CSAR_peak_ | 10.83         | + |
| chr4 | 9717223 | 9717278 | CSAR_peak_ | 10.02         | + |
| chr4 | 9719807 | 9719868 | CSAR_peak_ | 7.61,16.08    | + |

|      |         |         |             |                |   |
|------|---------|---------|-------------|----------------|---|
| chr4 | 9719957 | 9719967 | CSAR_peak_  | 8.65           | + |
| chr4 | 9759452 | 9759506 | CSAR_peak_! | 8.39           | + |
| chr4 | 9759529 | 9759583 | CSAR_peak_! | 6.03           | + |
| chr4 | 9759741 | 9759997 | CSAR_peak_! | 12.89,8.95,1!  | + |
| chr4 | 9760111 | 9760197 | CSAR_peak_! | 26.69,15       | + |
| chr4 | 9772272 | 9772314 | CSAR_peak_! | 6.03           | + |
| chr4 | 9772510 | 9772558 | CSAR_peak_! | 7.92           | + |
| chr4 | 9772959 | 9772982 | CSAR_peak_! | 6.57           | + |
| chr4 | 9781116 | 9781163 | CSAR_peak_! | 8.39           | + |
| chr4 | 9816473 | 9816528 | CSAR_peak_! | 8.39           | + |
| chr4 | 9816557 | 9816632 | CSAR_peak_! | 8.28,10.02     | + |
| chr4 | 9816646 | 9816763 | CSAR_peak_! | 20.43,11.08    | + |
| chr4 | 9816852 | 9817248 | CSAR_peak_! | 13,18.17,20.!  | + |
| chr4 | 9817349 | 9817403 | CSAR_peak_! | 6.85,8.13      | + |
| chr4 | 9817525 | 9817680 | CSAR_peak_! | 8.65,12.17,7.! | + |
| chr4 | 9817681 | 9817733 | CSAR_peak_! | 8.13,6.65      | + |
| chr4 | 9817886 | 9818003 | CSAR_peak_! | 7.27,12.31,1!  | + |
| chr4 | 9818006 | 9818086 | CSAR_peak_! | 7.9,6.01,6.01  | + |
| chr4 | 9818154 | 9818477 | CSAR_peak_! | 35.33,28.34,!  | + |
| chr4 | 9818490 | 9818713 | CSAR_peak_! | 7.89,26.05,1!  | + |
| chr4 | 9818716 | 9818734 | CSAR_peak_! | 6.52           | + |
| chr4 | 9818808 | 9819125 | CSAR_peak_! | 24.52,15.43,!  | + |
| chr4 | 9819213 | 9819262 | CSAR_peak_! | 12.13          | + |
| chr4 | 9819293 | 9819450 | CSAR_peak_! | 8.39,8.95      | + |
| chr4 | 9819502 | 9819570 | CSAR_peak_! | 14.88,13.44    | + |
| chr4 | 9819639 | 9819748 | CSAR_peak_! | 14.88,10.83    | + |
| chr4 | 9819797 | 9820263 | CSAR_peak_! | 14.34,20.94,!  | + |
| chr4 | 9820309 | 9820386 | CSAR_peak_! | 17.82,16.11    | + |
| chr4 | 9820470 | 9820513 | CSAR_peak_! | 12.13          | + |
| chr4 | 9820844 | 9820935 | CSAR_peak_! | 7.58           | + |
| chr4 | 9820962 | 9821030 | CSAR_peak_! | 13.44          | + |
| chr4 | 9821326 | 9821383 | CSAR_peak_! | 8.39           | + |
| chr4 | 9821437 | 9821577 | CSAR_peak_! | 9.58           | + |
| chr4 | 9821897 | 9822005 | CSAR_peak_! | 6.57,16.08     | + |
| chr4 | 9822178 | 9822317 | CSAR_peak_! | 25.1,9.41      | + |
| chr4 | 9822376 | 9822459 | CSAR_peak_! | 17.82,9.77,1!  | + |
| chr4 | 9822481 | 9822562 | CSAR_peak_! | 6.95           | + |
| chr4 | 9822572 | 9822653 | CSAR_peak_! | 7.26           | + |
| chr4 | 9822840 | 9822903 | CSAR_peak_! | 16.54,10.52    | + |
| chr4 | 9823072 | 9823121 | CSAR_peak_! | 11.66          | + |
| chr4 | 9823123 | 9823210 | CSAR_peak_! | 8.39,10.83     | + |
| chr4 | 9823259 | 9823300 | CSAR_peak_! | 8.39           | + |

|      |          |          |             |                |   |
|------|----------|----------|-------------|----------------|---|
| chr4 | 9823544  | 9823560  | CSAR_peak_! | 6.02           | + |
| chr4 | 9823575  | 9823618  | CSAR_peak_! | 8.58,6.53      | + |
| chr4 | 9823876  | 9823908  | CSAR_peak_! | 8.65           | + |
| chr4 | 9823993  | 9824018  | CSAR_peak_! | 6.21           | + |
| chr4 | 9824140  | 9824184  | CSAR_peak_! | 6.21           | + |
| chr4 | 9824268  | 9824343  | CSAR_peak_! | 7.58,10.36,7.  | + |
| chr4 | 9824426  | 9824466  | CSAR_peak_! | 6.14           | + |
| chr4 | 9824472  | 9824592  | CSAR_peak_! | 19.96,6.85     | + |
| chr4 | 9824596  | 9824640  | CSAR_peak_! | 6.21           | + |
| chr4 | 9825272  | 9825328  | CSAR_peak_! | 8.39           | + |
| chr4 | 9825486  | 9825517  | CSAR_peak_! | 8.39           | + |
| chr4 | 9826168  | 9826217  | CSAR_peak_! | 6.21,7.34      | + |
| chr4 | 9826846  | 9826949  | CSAR_peak_! | 12.17,7.27,6.  | + |
| chr4 | 9929178  | 9929231  | CSAR_peak_! | 7.27           | + |
| chr4 | 9941214  | 9941265  | CSAR_peak_! | 8.39           | + |
| chr4 | 9946039  | 9946109  | CSAR_peak_! | 6.72,7.73,8.5  | + |
| chr4 | 9947174  | 9947198  | CSAR_peak_! | 5.62           | + |
| chr4 | 9947471  | 9947577  | CSAR_peak_! | 19.36,9.97     | + |
| chr4 | 9947632  | 9947716  | CSAR_peak_! | 6.22,17.82     | + |
| chr4 | 10030742 | 10030870 | CSAR_peak_! | 9.58,7.71,9.6  | + |
| chr4 | 10030875 | 10030945 | CSAR_peak_! | 6.02,8.39      | + |
| chr4 | 10031236 | 10031322 | CSAR_peak_! | 13.85,8.39     | + |
| chr4 | 10031334 | 10031448 | CSAR_peak_! | 18.73,28.21    | + |
| chr4 | 10031469 | 10031980 | CSAR_peak_! | 15.76,35.23,   | + |
| chr4 | 10032036 | 10032103 | CSAR_peak_! | 21.56,11.8     | + |
| chr4 | 10032127 | 10032156 | CSAR_peak_! | 8.39           | + |
| chr4 | 10032184 | 10032377 | CSAR_peak_! | 8.95,11.57,1.  | + |
| chr4 | 10032475 | 10032616 | CSAR_peak_! | 8.65,12.17,1(+ |   |
| chr4 | 10032617 | 10032716 | CSAR_peak_! | 9.72,12.13     | + |
| chr4 | 10032894 | 10032931 | CSAR_peak_! | 8.39           | + |
| chr4 | 10033347 | 10033418 | CSAR_peak_! | 6.85,20.94     | + |
| chr4 | 10033544 | 10033588 | CSAR_peak_! | 6.21           | + |
| chr4 | 10039457 | 10039515 | CSAR_peak_! | 6.37,19.15     | + |
| chr4 | 10040033 | 10040150 | CSAR_peak_! | 10.94,9.97     | + |
| chr4 | 10040169 | 10040220 | CSAR_peak_! | 17.3,5.9,6.51+ |   |
| chr4 | 10040296 | 10040386 | CSAR_peak_! | 15             | + |
| chr4 | 10040463 | 10040540 | CSAR_peak_! | 7.27           | + |
| chr4 | 10040634 | 10040657 | CSAR_peak_! | 7.27           | + |
| chr4 | 10041105 | 10041175 | CSAR_peak_! | 11.28,5.67,1(+ |   |
| chr4 | 10041261 | 10041346 | CSAR_peak_! | 19.94,11.35    | + |
| chr4 | 10082337 | 10082376 | CSAR_peak_! | 6.21           | + |
| chr4 | 10084141 | 10084224 | CSAR_peak_! | 8.39,6.21      | + |

|      |          |          |             |               |   |
|------|----------|----------|-------------|---------------|---|
| chr4 | 10084274 | 10084321 | CSAR_peak_  | 9.58          | + |
| chr4 | 10084494 | 10084543 | CSAR_peak_  | 7.34,6.57     | + |
| chr4 | 10084748 | 10084793 | CSAR_peak_  | 5.62          | + |
| chr4 | 10084882 | 10084964 | CSAR_peak_  | 12.5          | + |
| chr4 | 10085310 | 10085368 | CSAR_peak_  | 8.39          | + |
| chr4 | 10086256 | 10086331 | CSAR_peak_! | 8.39          | + |
| chr4 | 10104184 | 10104475 | CSAR_peak_  | 24.74,17.27,  | + |
| chr4 | 10104563 | 10104642 | CSAR_peak_  | 26.69,7.26    | + |
| chr4 | 10104852 | 10104907 | CSAR_peak_! | 13.48,19.36   | + |
| chr4 | 10112436 | 10112467 | CSAR_peak_  | 8.52          | + |
| chr4 | 10218648 | 10218702 | CSAR_peak_! | 6.21          | + |
| chr4 | 10296457 | 10296489 | CSAR_peak_! | 7.27,7.27     | + |
| chr4 | 10297078 | 10297119 | CSAR_peak_! | 6.95          | + |
| chr4 | 10297313 | 10297410 | CSAR_peak_! | 10.35         | + |
| chr4 | 10297465 | 10297518 | CSAR_peak_  | 10.83,7.27    | + |
| chr4 | 10297865 | 10297920 | CSAR_peak_  | 13.6          | + |
| chr4 | 10298006 | 10298018 | CSAR_peak_  | 6.21          | + |
| chr4 | 10298095 | 10298147 | CSAR_peak_  | 6.21,8.39     | + |
| chr4 | 10298220 | 10298288 | CSAR_peak_  | 14.76,25.62   | + |
| chr4 | 10298368 | 10298383 | CSAR_peak_! | 6.21          | + |
| chr4 | 10352781 | 10352839 | CSAR_peak_  | 6.21          | + |
| chr4 | 10375641 | 10375676 | CSAR_peak_! | 8.39          | + |
| chr4 | 10375764 | 10375930 | CSAR_peak_  | 5.62,12.5,6.9 | + |
| chr4 | 10375965 | 10376018 | CSAR_peak_  | 7.58          | + |
| chr4 | 10376505 | 10376561 | CSAR_peak_  | 7.58          | + |
| chr4 | 10376728 | 10376767 | CSAR_peak_  | 5.62          | + |
| chr4 | 10376849 | 10376907 | CSAR_peak_! | 6.21          | + |
| chr4 | 10377683 | 10377707 | CSAR_peak_! | 7.27          | + |
| chr4 | 10416331 | 10416377 | CSAR_peak_  | 7.27,10.83    | + |
| chr4 | 10470308 | 10470358 | CSAR_peak_! | 6.21          | + |
| chr4 | 10477843 | 10477880 | CSAR_peak_  | 5.62          | + |
| chr4 | 10478328 | 10478372 | CSAR_peak_  | 7.92          | + |
| chr4 | 10478732 | 10478792 | CSAR_peak_! | 8.39          | + |
| chr4 | 10478842 | 10478905 | CSAR_peak_  | 10.83,10.83   | + |
| chr4 | 10478985 | 10479038 | CSAR_peak_! | 6.57,10.83    | + |
| chr4 | 10479136 | 10479255 | CSAR_peak_  | 8.95          | + |
| chr4 | 10479615 | 10479650 | CSAR_peak_  | 6.03          | + |
| chr4 | 10479699 | 10479758 | CSAR_peak_! | 6.21          | + |
| chr4 | 10494297 | 10494331 | CSAR_peak_  | 8.39          | + |
| chr4 | 10495434 | 10495479 | CSAR_peak_! | 6.21          | + |
| chr4 | 10495620 | 10495777 | CSAR_peak_! | 8.39,10.83    | + |
| chr4 | 10498925 | 10498965 | CSAR_peak_  | 6.57          | + |



|      |          |          |             |                   |   |
|------|----------|----------|-------------|-------------------|---|
| chr4 | 10499040 | 10499088 | CSAR_peak_! | 7.27              | + |
| chr4 | 10499122 | 10499322 | CSAR_peak_! | 31.58,7.48,10.62  | + |
| chr4 | 10499327 | 10499343 | CSAR_peak_! | 6.31              | + |
| chr4 | 10499501 | 10499533 | CSAR_peak_! | 6.57,10.62        | + |
| chr4 | 10499686 | 10499847 | CSAR_peak_! | 8.39,10.83        | + |
| chr4 | 10500089 | 10500112 | CSAR_peak_! | 6.03              | + |
| chr4 | 10500160 | 10500224 | CSAR_peak_! | 7.73,10.94        | + |
| chr4 | 10500292 | 10500370 | CSAR_peak_! | 22.84,8.22        | + |
| chr4 | 10500476 | 10500552 | CSAR_peak_! | 12.13,9.54        | + |
| chr4 | 10500805 | 10500862 | CSAR_peak_! | 7.27              | + |
| chr4 | 10501833 | 10501899 | CSAR_peak_! | 7.73,9.58         | + |
| chr4 | 10502099 | 10502150 | CSAR_peak_! | 6.21              | + |
| chr4 | 10502220 | 10502269 | CSAR_peak_! | 7.73              | + |
| chr4 | 10502276 | 10502324 | CSAR_peak_! | 8.65              | + |
| chr4 | 10502354 | 10502409 | CSAR_peak_! | 6.87,6.21         | + |
| chr4 | 10502473 | 10502508 | CSAR_peak_! | 7.92              | + |
| chr4 | 10502779 | 10502888 | CSAR_peak_! | 8.92,8.95         | + |
| chr4 | 10502993 | 10503037 | CSAR_peak_! | 7.27,7.58         | + |
| chr4 | 10503064 | 10503114 | CSAR_peak_! | 10.06             | + |
| chr4 | 10503153 | 10503266 | CSAR_peak_! | 8.39              | + |
| chr4 | 10503393 | 10503480 | CSAR_peak_! | 9.27,9.58         | + |
| chr4 | 10503539 | 10503589 | CSAR_peak_! | 8.95              | + |
| chr4 | 10503653 | 10503761 | CSAR_peak_! | 9.41,12.98        | + |
| chr4 | 10503792 | 10503804 | CSAR_peak_! | 16.19             | + |
| chr4 | 10503892 | 10503953 | CSAR_peak_! | 7.27,6.21         | + |
| chr4 | 10503999 | 10504090 | CSAR_peak_! | 9.58,14.88        | + |
| chr4 | 10504158 | 10504219 | CSAR_peak_! | 5.75              | + |
| chr4 | 10504287 | 10504343 | CSAR_peak_! | 7.27,9.84         | + |
| chr4 | 10504394 | 10504454 | CSAR_peak_! | 7.27              | + |
| chr4 | 10504693 | 10504753 | CSAR_peak_! | 6.42              | + |
| chr4 | 10504755 | 10504792 | CSAR_peak_! | 12.5              | + |
| chr4 | 10506558 | 10506650 | CSAR_peak_! | 12.31,12.17       | + |
| chr4 | 10522867 | 10522912 | CSAR_peak_! | 18.65,16.33,10.62 | + |
| chr4 | 10522984 | 10522990 | CSAR_peak_! | 6.03              | + |
| chr4 | 10523484 | 10523532 | CSAR_peak_! | 6.31              | + |
| chr4 | 10578633 | 10578676 | CSAR_peak_! | 6.85              | + |
| chr4 | 10608498 | 10608577 | CSAR_peak_! | 8.39              | + |
| chr4 | 10619435 | 10619483 | CSAR_peak_! | 6.21              | + |
| chr4 | 10621059 | 10621100 | CSAR_peak_! | 8.39              | + |
| chr4 | 10622092 | 10622163 | CSAR_peak_! | 7.27,6.57         | + |
| chr4 | 10622862 | 10622902 | CSAR_peak_! | 7.27              | + |
| chr4 | 10626173 | 10626226 | CSAR_peak_! | 7.27              | + |

|      |          |          |             |               |   |
|------|----------|----------|-------------|---------------|---|
| chr4 | 10627978 | 10628034 | CSAR_peak_! | 7.27          | + |
| chr4 | 10629122 | 10629195 | CSAR_peak_! | 12.13         | + |
| chr4 | 10634543 | 10634585 | CSAR_peak_! | 8.39          | + |
| chr4 | 10634832 | 10634963 | CSAR_peak_! | 9.58          | + |
| chr4 | 10653728 | 10653829 | CSAR_peak_! | 19.36,6.45,7. | + |
| chr4 | 10653838 | 10653864 | CSAR_peak_! | 6.57          | + |
| chr4 | 10653871 | 10653962 | CSAR_peak_! | 6.21          | + |
| chr4 | 10654031 | 10654077 | CSAR_peak_! | 7.58          | + |
| chr4 | 10654100 | 10654150 | CSAR_peak_! | 10.83,8.39    | + |
| chr4 | 10655033 | 10655073 | CSAR_peak_! | 7.27          | + |
| chr4 | 10657699 | 10657779 | CSAR_peak_! | 10.83         | + |
| chr4 | 10658664 | 10658712 | CSAR_peak_! | 10.83         | + |
| chr4 | 10658994 | 10659040 | CSAR_peak_! | 7.27          | + |
| chr4 | 10676150 | 10676243 | CSAR_peak_! | 7.58,9.03     | + |
| chr4 | 10813795 | 10813854 | CSAR_peak_! | 16.08,10.62   | + |
| chr4 | 10813903 | 10813957 | CSAR_peak_! | 12.74         | + |
| chr4 | 10814152 | 10814198 | CSAR_peak_! | 9.32,12.31    | + |
| chr4 | 10814230 | 10814368 | CSAR_peak_! | 13.48,25.07,! | + |
| chr4 | 10814396 | 10814437 | CSAR_peak_! | 11.14         | + |
| chr4 | 10814580 | 10814600 | CSAR_peak_! | 14.88         | + |
| chr4 | 10814714 | 10814730 | CSAR_peak_! | 14.88         | + |
| chr4 | 10814804 | 10814896 | CSAR_peak_! | 13.44,12.17   | + |
| chr4 | 10814927 | 10814994 | CSAR_peak_! | 12.13         | + |
| chr4 | 10815001 | 10815019 | CSAR_peak_! | 7.73,6.57     | + |
| chr4 | 10815031 | 10815074 | CSAR_peak_! | 8.3,9.61,9.31 | + |
| chr4 | 10815129 | 10815175 | CSAR_peak_! | 9.03,8.09     | + |
| chr4 | 10815348 | 10815419 | CSAR_peak_! | 8.95,8.65     | + |
| chr4 | 10815470 | 10815488 | CSAR_peak_! | 6.52          | + |
| chr4 | 10815558 | 10815684 | CSAR_peak_! | 6.21,8.65,13. | + |
| chr4 | 10815817 | 10815906 | CSAR_peak_! | 6.21,8.95     | + |
| chr4 | 10816224 | 10816282 | CSAR_peak_! | 10.95,16.33   | + |
| chr4 | 10816297 | 10816384 | CSAR_peak_! | 14.76,13.51,! | + |
| chr4 | 10816454 | 10816517 | CSAR_peak_! | 6.44,6.21     | + |
| chr4 | 10861972 | 10862023 | CSAR_peak_! | 7.27          | + |
| chr4 | 10863405 | 10863412 | CSAR_peak_! | 6.03          | + |
| chr4 | 10863899 | 10863962 | CSAR_peak_! | 6.21,7.92     | + |
| chr4 | 10864238 | 10864277 | CSAR_peak_! | 5.62,10.02    | + |
| chr4 | 10897944 | 10897979 | CSAR_peak_! | 6.21,7.27     | + |
| chr4 | 10940931 | 10940993 | CSAR_peak_! | 7.27          | + |
| chr4 | 10941188 | 10941244 | CSAR_peak_! | 19.36         | + |
| chr4 | 10941574 | 10941663 | CSAR_peak_! | 25.07,10.94   | + |
| chr4 | 10941690 | 10941704 | CSAR_peak_! | 19.36         | + |

|      |          |          |            |               |   |
|------|----------|----------|------------|---------------|---|
| chr4 | 10941997 | 10942131 | CSAR_peak_ | 14.34,12.2    | + |
| chr4 | 10942157 | 10942239 | CSAR_peak_ | 16.54,16.33,  | + |
| chr4 | 10942254 | 10942307 | CSAR_peak_ | 6.97,17.68,6. | + |
| chr4 | 10942724 | 10942802 | CSAR_peak_ | 12.13,8.65    | + |
| chr4 | 10942829 | 10942867 | CSAR_peak_ | 11.28,6.95    | + |
| chr4 | 10942903 | 10942957 | CSAR_peak_ | 8.12,6.05     | + |
| chr4 | 10942996 | 10943135 | CSAR_peak_ | 18.08,7.09,6. | + |
| chr4 | 10955609 | 10955648 | CSAR_peak_ | 7.27          | + |
| chr4 | 10957705 | 10957740 | CSAR_peak_ | 5.62          | + |
| chr4 | 10957896 | 10957979 | CSAR_peak_ | 7.58          | + |
| chr4 | 10958050 | 10958085 | CSAR_peak_ | 7.27          | + |
| chr4 | 10975759 | 10975804 | CSAR_peak_ | 8.39          | + |
| chr4 | 10976108 | 10976172 | CSAR_peak_ | 6.57,10.83    | + |
| chr4 | 10976438 | 10976480 | CSAR_peak_ | 7.27          | + |
| chr4 | 10977701 | 10977727 | CSAR_peak_ | 6.21          | + |
| chr4 | 10978003 | 10978061 | CSAR_peak_ | 6.21          | + |
| chr4 | 10978194 | 10978239 | CSAR_peak_ | 6.21          | + |
| chr4 | 10978332 | 10978381 | CSAR_peak_ | 10.83,12.13   | + |
| chr4 | 10978525 | 10978574 | CSAR_peak_ | 9.58          | + |
| chr4 | 10990506 | 10990564 | CSAR_peak_ | 6.45          | + |
| chr4 | 10990904 | 10990951 | CSAR_peak_ | 10.33         | + |
| chr4 | 10991260 | 10991331 | CSAR_peak_ | 13.44,9.41    | + |
| chr4 | 10991345 | 10991437 | CSAR_peak_ | 13.51         | + |
| chr4 | 10992068 | 10992122 | CSAR_peak_ | 13.48         | + |
| chr4 | 10992445 | 10992493 | CSAR_peak_ | 8.39          | + |
| chr4 | 11004958 | 11005000 | CSAR_peak_ | 7.27          | + |
| chr4 | 11005177 | 11005345 | CSAR_peak_ | 12.17,20.94,  | + |
| chr4 | 11005855 | 11005944 | CSAR_peak_ | 7.27          | + |
| chr4 | 11006074 | 11006112 | CSAR_peak_ | 8.39          | + |
| chr4 | 11006251 | 11006310 | CSAR_peak_ | 11.38         | + |
| chr4 | 11006352 | 11006455 | CSAR_peak_ | 6.02,8.39,10. | + |
| chr4 | 11006944 | 11006983 | CSAR_peak_ | 7.27          | + |
| chr4 | 11007641 | 11007719 | CSAR_peak_ | 10.83         | + |
| chr4 | 11010410 | 11010432 | CSAR_peak_ | 7.73          | + |
| chr4 | 11156113 | 11156196 | CSAR_peak_ | 6.21          | + |
| chr4 | 11156237 | 11156307 | CSAR_peak_ | 12.13,9.61    | + |
| chr4 | 11156344 | 11156424 | CSAR_peak_ | 14.88,13      | + |
| chr4 | 11156500 | 11156554 | CSAR_peak_ | 12.13,9.31    | + |
| chr4 | 11156923 | 11156974 | CSAR_peak_ | 16.05         | + |
| chr4 | 11157284 | 11157346 | CSAR_peak_ | 6.21          | + |
| chr4 | 11157421 | 11157476 | CSAR_peak_ | 10.02         | + |
| chr4 | 11173014 | 11173068 | CSAR_peak_ | 6.02          | + |

|      |          |          |             |                  |   |
|------|----------|----------|-------------|------------------|---|
| chr4 | 11173273 | 11173389 | CSAR_peak_! | 16.33,10.62      | + |
| chr4 | 11174125 | 11174186 | CSAR_peak_! | 6.21             | + |
| chr4 | 11182173 | 11182237 | CSAR_peak_! | 8.39,6.21        | + |
| chr4 | 11182524 | 11182622 | CSAR_peak_! | 6.64,6.02        | + |
| chr4 | 11183779 | 11183839 | CSAR_peak_! | 13.29,16.11      | + |
| chr4 | 11279065 | 11279117 | CSAR_peak_! | 10.83            | + |
| chr4 | 11427334 | 11427432 | CSAR_peak_! | 5.62,10.31       | + |
| chr4 | 11427716 | 11427789 | CSAR_peak_! | 12.74,6.87,10.83 | + |
| chr4 | 11427843 | 11427913 | CSAR_peak_! | 9.77,8.13        | + |
| chr4 | 11427930 | 11427977 | CSAR_peak_! | 14.76,12.27      | + |
| chr4 | 11430189 | 11430223 | CSAR_peak_! | 6.21             | + |
| chr4 | 11432108 | 11432160 | CSAR_peak_! | 8.39             | + |
| chr4 | 11432907 | 11432976 | CSAR_peak_! | 14.88            | + |
| chr4 | 11433419 | 11433483 | CSAR_peak_! | 8.39             | + |
| chr4 | 11456624 | 11456657 | CSAR_peak_! | 7.34             | + |
| chr4 | 11457408 | 11457459 | CSAR_peak_! | 7.27             | + |
| chr4 | 11457495 | 11457510 | CSAR_peak_! | 7.27             | + |
| chr4 | 11457605 | 11457659 | CSAR_peak_! | 7.92,6.44        | + |
| chr4 | 11458011 | 11458061 | CSAR_peak_! | 8.39             | + |
| chr4 | 11458398 | 11458428 | CSAR_peak_! | 8.39             | + |
| chr4 | 11458645 | 11458687 | CSAR_peak_! | 7.27             | + |
| chr4 | 11459716 | 11459765 | CSAR_peak_! | 7.27             | + |
| chr4 | 11460633 | 11460716 | CSAR_peak_! | 14.88,6.95       | + |
| chr4 | 11461085 | 11461163 | CSAR_peak_! | 9.58             | + |
| chr4 | 11461673 | 11461728 | CSAR_peak_! | 7.34             | + |
| chr4 | 11461760 | 11461810 | CSAR_peak_! | 6.21             | + |
| chr4 | 11475778 | 11475860 | CSAR_peak_! | 7.26,6.21        | + |
| chr4 | 11477085 | 11477134 | CSAR_peak_! | 6.57             | + |
| chr4 | 11511515 | 11511580 | CSAR_peak_! | 8.39             | + |
| chr4 | 11512881 | 11512933 | CSAR_peak_! | 6.21             | + |
| chr4 | 11513511 | 11513557 | CSAR_peak_! | 6.57             | + |
| chr4 | 11513940 | 11513983 | CSAR_peak_! | 7.92             | + |
| chr4 | 11514680 | 11514726 | CSAR_peak_! | 10.83            | + |
| chr4 | 11516859 | 11516942 | CSAR_peak_! | 8.39             | + |
| chr4 | 11569959 | 11569993 | CSAR_peak_! | 6.64             | + |
| chr4 | 11570044 | 11570083 | CSAR_peak_! | 7.27             | + |
| chr4 | 11570294 | 11570417 | CSAR_peak_! | 8.39,7.13        | + |
| chr4 | 11570422 | 11570475 | CSAR_peak_! | 7.36             | + |
| chr4 | 11570518 | 11570575 | CSAR_peak_! | 8.65             | + |
| chr4 | 11570581 | 11570597 | CSAR_peak_! | 6.37             | + |
| chr4 | 11570607 | 11570634 | CSAR_peak_! | 6.57             | + |
| chr4 | 11570664 | 11570894 | CSAR_peak_! | 7.58,12.6,8.1    | + |

|      |          |          |             |               |   |
|------|----------|----------|-------------|---------------|---|
| chr4 | 11570930 | 11571004 | CSAR_peak_! | 8.5           | + |
| chr4 | 11571038 | 11571163 | CSAR_peak_! | 16.33,12.13   | + |
| chr4 | 11571198 | 11571359 | CSAR_peak_! | 18.65,9.27,1  | + |
| chr4 | 11571457 | 11571489 | CSAR_peak_! | 8.39          | + |
| chr4 | 11571626 | 11571834 | CSAR_peak_! | 23.03,11.14,  | + |
| chr4 | 11571893 | 11572004 | CSAR_peak_! | 13.44,10.31,  | + |
| chr4 | 11572097 | 11572195 | CSAR_peak_! | 26.42,7.61    | + |
| chr4 | 11572276 | 11572308 | CSAR_peak_! | 8.9           | + |
| chr4 | 11572310 | 11572386 | CSAR_peak_! | 9.58          | + |
| chr4 | 11642703 | 11642763 | CSAR_peak_! | 7.27          | + |
| chr4 | 11665259 | 11665303 | CSAR_peak_! | 6.21          | + |
| chr4 | 11773710 | 11773760 | CSAR_peak_! | 9.58          | + |
| chr4 | 11795099 | 11795220 | CSAR_peak_! | 28.74,75.02,  | + |
| chr4 | 11795226 | 11795273 | CSAR_peak_! | 16.61,31.79   | + |
| chr4 | 11798433 | 11798467 | CSAR_peak_! | 8.39          | + |
| chr4 | 11809161 | 11809317 | CSAR_peak_! | 7.58,6.95,9.7 | + |
| chr4 | 11811401 | 11811456 | CSAR_peak_! | 6.21          | + |
| chr4 | 11959167 | 11959219 | CSAR_peak_! | 8.39          | + |
| chr4 | 12080133 | 12080213 | CSAR_peak_! | 6.57          | + |
| chr4 | 12080245 | 12080301 | CSAR_peak_! | 21.56,9.77    | + |
| chr4 | 12081896 | 12081944 | CSAR_peak_! | 7.58          | + |
| chr4 | 12087660 | 12087695 | CSAR_peak_! | 6.03          | + |
| chr4 | 12087773 | 12087826 | CSAR_peak_! | 9.77,7.27     | + |
| chr4 | 12089160 | 12089189 | CSAR_peak_! | 8.39          | + |
| chr4 | 12090386 | 12090449 | CSAR_peak_! | 17.82,10.83   | + |
| chr4 | 12138860 | 12138936 | CSAR_peak_! | 7.27          | + |
| chr4 | 12139404 | 12139466 | CSAR_peak_! | 9.61,6.44     | + |
| chr4 | 12139559 | 12139599 | CSAR_peak_! | 9.77          | + |
| chr4 | 12140018 | 12140100 | CSAR_peak_! | 17.82,13.48   | + |
| chr4 | 12140236 | 12140337 | CSAR_peak_! | 10.83,8.39    | + |
| chr4 | 12171810 | 12171862 | CSAR_peak_! | 7.58          | + |
| chr4 | 12172093 | 12172153 | CSAR_peak_! | 8.89,8.65     | + |
| chr4 | 12172292 | 12172341 | CSAR_peak_! | 9.58,6.44     | + |
| chr4 | 12172626 | 12172697 | CSAR_peak_! | 5.9,9.03,20.4 | + |
| chr4 | 12173011 | 12173093 | CSAR_peak_! | 9.58          | + |
| chr4 | 12173113 | 12173175 | CSAR_peak_! | 6.95,7.78     | + |
| chr4 | 12173359 | 12173409 | CSAR_peak_! | 9.32,9.79     | + |
| chr4 | 12173486 | 12173503 | CSAR_peak_! | 10.83         | + |
| chr4 | 12173608 | 12173652 | CSAR_peak_! | 7.27          | + |
| chr4 | 12193178 | 12193187 | CSAR_peak_! | 6.21          | + |
| chr4 | 12193299 | 12193362 | CSAR_peak_! | 7.58,14.88    | + |
| chr4 | 12194365 | 12194404 | CSAR_peak_! | 7.27          | + |

|      |          |          |             |               |   |
|------|----------|----------|-------------|---------------|---|
| chr4 | 12221396 | 12221407 | CSAR_peak_! | 6.21          | + |
| chr4 | 12221578 | 12221599 | CSAR_peak_! | 6.21          | + |
| chr4 | 12225705 | 12225753 | CSAR_peak_! | 80.17,112.05  | + |
| chr4 | 12225882 | 12225920 | CSAR_peak_! | 12.17,7.92    | + |
| chr4 | 12229161 | 12229212 | CSAR_peak_! | 6.95          | + |
| chr4 | 12229236 | 12229277 | CSAR_peak_! | 8.95          | + |
| chr4 | 12230022 | 12230037 | CSAR_peak_! | 6.95          | + |
| chr4 | 12230370 | 12230410 | CSAR_peak_! | 7.27          | + |
| chr4 | 12230539 | 12230573 | CSAR_peak_! | 6.87          | + |
| chr4 | 12230612 | 12230681 | CSAR_peak_! | 8.95,6.95     | + |
| chr4 | 12230748 | 12230811 | CSAR_peak_! | 12.17         | + |
| chr4 | 12249257 | 12249299 | CSAR_peak_! | 13.51         | + |
| chr4 | 12249833 | 12249875 | CSAR_peak_! | 7.34          | + |
| chr4 | 12249961 | 12249987 | CSAR_peak_! | 7.73          | + |
| chr4 | 12250323 | 12250370 | CSAR_peak_! | 8.39          | + |
| chr4 | 12250553 | 12250603 | CSAR_peak_! | 6.87,13.48    | + |
| chr4 | 12250701 | 12250720 | CSAR_peak_! | 6.45,9.58     | + |
| chr4 | 12250781 | 12250818 | CSAR_peak_! | 14.34         | + |
| chr4 | 12301639 | 12301701 | CSAR_peak_! | 6.21          | + |
| chr4 | 12302065 | 12302110 | CSAR_peak_! | 12.17         | + |
| chr4 | 12302280 | 12302299 | CSAR_peak_! | 10.95         | + |
| chr4 | 12318078 | 12318118 | CSAR_peak_! | 8.13          | + |
| chr4 | 12318261 | 12318335 | CSAR_peak_! | 13.48,14.76   | + |
| chr4 | 12318741 | 12318790 | CSAR_peak_! | 12.13         | + |
| chr4 | 12319050 | 12319108 | CSAR_peak_! | 8.12          | + |
| chr4 | 12319177 | 12319235 | CSAR_peak_! | 6.03          | + |
| chr4 | 12319273 | 12319321 | CSAR_peak_! | 8.95          | + |
| chr4 | 12319440 | 12319502 | CSAR_peak_! | 10.62         | + |
| chr4 | 12319514 | 12319589 | CSAR_peak_! | 21.94         | + |
| chr4 | 12363955 | 12364008 | CSAR_peak_! | 10.83         | + |
| chr4 | 12422456 | 12422505 | CSAR_peak_! | 10.83         | + |
| chr4 | 12423096 | 12423137 | CSAR_peak_! | 7.27          | + |
| chr4 | 12423910 | 12423961 | CSAR_peak_! | 6.21          | + |
| chr4 | 12426053 | 12426102 | CSAR_peak_! | 7.92          | + |
| chr4 | 12427216 | 12427279 | CSAR_peak_! | 7.73          | + |
| chr4 | 12428714 | 12428748 | CSAR_peak_! | 7.27          | + |
| chr4 | 12431986 | 12432034 | CSAR_peak_! | 9.58          | + |
| chr4 | 12432076 | 12432164 | CSAR_peak_! | 13.51,9.58,6. | + |
| chr4 | 12432212 | 12432264 | CSAR_peak_! | 14.88         | + |
| chr4 | 12432561 | 12432668 | CSAR_peak_! | 8.39,6.21     | + |
| chr4 | 12433118 | 12433218 | CSAR_peak_! | 12.31,7.68    | + |
| chr4 | 12433396 | 12433430 | CSAR_peak_! | 6.21          | + |

|      |          |          |             |                  |   |
|------|----------|----------|-------------|------------------|---|
| chr4 | 12451571 | 12451597 | CSAR_peak_4 | 7.58             | + |
| chr4 | 12452758 | 12452796 | CSAR_peak_! | 6.21             | + |
| chr4 | 12480288 | 12480393 | CSAR_peak_! | 8.65             | + |
| chr4 | 12480623 | 12480749 | CSAR_peak_! | 7.27             | + |
| chr4 | 12481219 | 12481260 | CSAR_peak_4 | 6.21             | + |
| chr4 | 12481676 | 12481724 | CSAR_peak_4 | 6.21,7.27        | + |
| chr4 | 12482795 | 12482859 | CSAR_peak_4 | 7.27             | + |
| chr4 | 12540325 | 12540367 | CSAR_peak_! | 6.21             | + |
| chr4 | 12540377 | 12540426 | CSAR_peak_! | 7.58             | + |
| chr4 | 12540515 | 12540560 | CSAR_peak_4 | 6.21             | + |
| chr4 | 12541419 | 12541462 | CSAR_peak_! | 5.62             | + |
| chr4 | 12541560 | 12541599 | CSAR_peak_! | 12.31,6.44       | + |
| chr4 | 12565202 | 12565258 | CSAR_peak_4 | 9.27,10.02       | + |
| chr4 | 12565329 | 12565411 | CSAR_peak_! | 13.51,8.95       | + |
| chr4 | 12565614 | 12565674 | CSAR_peak_! | 8.39,13.48       | + |
| chr4 | 12566183 | 12566374 | CSAR_peak_! | 7.58             | + |
| chr4 | 12591435 | 12591472 | CSAR_peak_! | 10.83            | + |
| chr4 | 12591579 | 12591634 | CSAR_peak_! | 10.95            | + |
| chr4 | 12610045 | 12610076 | CSAR_peak_! | 6.57             | + |
| chr4 | 12610390 | 12610439 | CSAR_peak_4 | 7.58             | + |
| chr4 | 12610489 | 12610527 | CSAR_peak_4 | 8.65,13.48       | + |
| chr4 | 12610609 | 12610618 | CSAR_peak_! | 14.88            | + |
| chr4 | 12610660 | 12610673 | CSAR_peak_! | 6.85             | + |
| chr4 | 12611066 | 12611215 | CSAR_peak_! | 8.95,9.58,9.5    | + |
| chr4 | 12612638 | 12612679 | CSAR_peak_! | 8.39,6.21        | + |
| chr4 | 12613325 | 12613423 | CSAR_peak_! | 13.85,6.21,14.88 | + |
| chr4 | 12613479 | 12613535 | CSAR_peak_4 | 11.14,12.13      | + |
| chr4 | 12617457 | 12617494 | CSAR_peak_! | 8.39             | + |
| chr4 | 12619364 | 12619404 | CSAR_peak_! | 5.62             | + |
| chr4 | 12619633 | 12619682 | CSAR_peak_! | 9.77             | + |
| chr4 | 12619795 | 12619836 | CSAR_peak_! | 7.58             | + |
| chr4 | 12677016 | 12677066 | CSAR_peak_4 | 14.88            | + |
| chr4 | 12678378 | 12678408 | CSAR_peak_4 | 6.21             | + |
| chr4 | 12686735 | 12686783 | CSAR_peak_4 | 7.27             | + |
| chr4 | 12687296 | 12687341 | CSAR_peak_! | 6.91             | + |
| chr4 | 12687450 | 12687501 | CSAR_peak_! | 10.31            | + |
| chr4 | 12688504 | 12688521 | CSAR_peak_! | 6.21             | + |
| chr4 | 12735743 | 12735788 | CSAR_peak_! | 6.57             | + |
| chr4 | 12736012 | 12736042 | CSAR_peak_! | 6.57             | + |
| chr4 | 12737040 | 12737090 | CSAR_peak_! | 10.83            | + |
| chr4 | 12738963 | 12739015 | CSAR_peak_4 | 7.27             | + |
| chr4 | 12741182 | 12741224 | CSAR_peak_4 | 6.21             | + |

|      |          |          |             |                |   |
|------|----------|----------|-------------|----------------|---|
| chr4 | 12741566 | 12741623 | CSAR_peak_! | 6.57           | + |
| chr4 | 12741897 | 12741961 | CSAR_peak_! | 8.39,6.21      | + |
| chr4 | 12742561 | 12742592 | CSAR_peak_! | 6.21           | + |
| chr4 | 12742944 | 12742991 | CSAR_peak_! | 7.27           | + |
| chr4 | 12743227 | 12743279 | CSAR_peak_! | 8.39           | + |
| chr4 | 12743342 | 12743378 | CSAR_peak_! | 7.27           | + |
| chr4 | 12743450 | 12743494 | CSAR_peak_! | 9.27           | + |
| chr4 | 12743932 | 12743968 | CSAR_peak_! | 8.39           | + |
| chr4 | 12743975 | 12744034 | CSAR_peak_! | 6.95           | + |
| chr4 | 12744085 | 12744126 | CSAR_peak_! | 6.1,8.39       | + |
| chr4 | 12744158 | 12744183 | CSAR_peak_! | 6.21           | + |
| chr4 | 12782110 | 12782171 | CSAR_peak_! | 8.92,13.6,13.  | + |
| chr4 | 12782214 | 12782307 | CSAR_peak_! | 15.23,9.77     | + |
| chr4 | 12782859 | 12782919 | CSAR_peak_! | 16.33          | + |
| chr4 | 12783667 | 12783714 | CSAR_peak_! | 6.02           | + |
| chr4 | 12783994 | 12784054 | CSAR_peak_! | 6.44,8.39      | + |
| chr4 | 12784150 | 12784205 | CSAR_peak_! | 6.95           | + |
| chr4 | 12784661 | 12784696 | CSAR_peak_! | 12.13          | + |
| chr4 | 12784891 | 12784940 | CSAR_peak_! | 6.21           | + |
| chr4 | 12816039 | 12816091 | CSAR_peak_! | 7.27,7.92      | + |
| chr4 | 12817016 | 12817089 | CSAR_peak_! | 13.44          | + |
| chr4 | 12827954 | 12827996 | CSAR_peak_! | 10.83,6.57     | + |
| chr4 | 12828034 | 12828091 | CSAR_peak_! | 13.66          | + |
| chr4 | 12828153 | 12828248 | CSAR_peak_! | 22.74,13.66,1. | + |
| chr4 | 12828320 | 12828430 | CSAR_peak_! | 18.95,8.95,1.  | + |
| chr4 | 12828463 | 12828575 | CSAR_peak_! | 17.68,6.52     | + |
| chr4 | 12828584 | 12828642 | CSAR_peak_! | 9.58           | + |
| chr4 | 12828928 | 12828985 | CSAR_peak_! | 21.94,6.21     | + |
| chr4 | 12829122 | 12829152 | CSAR_peak_! | 9.77           | + |
| chr4 | 12870990 | 12871032 | CSAR_peak_! | 7.58           | + |
| chr4 | 12871112 | 12871176 | CSAR_peak_! | 21.56          | + |
| chr4 | 12909643 | 12909709 | CSAR_peak_! | 8.39           | + |
| chr4 | 12910090 | 12910124 | CSAR_peak_! | 6.21           | + |
| chr4 | 12910622 | 12910678 | CSAR_peak_! | 6.21           | + |
| chr4 | 12910710 | 12910867 | CSAR_peak_! | 6.21,17.51,9.  | + |
| chr4 | 12910916 | 12910952 | CSAR_peak_! | 9.77           | + |
| chr4 | 12910964 | 12911036 | CSAR_peak_! | 16.91,22.37,1. | + |
| chr4 | 12911166 | 12911208 | CSAR_peak_! | 6.21,6.02      | + |
| chr4 | 12911873 | 12911950 | CSAR_peak_! | 8.39           | + |
| chr4 | 12919172 | 12919235 | CSAR_peak_! | 6.21,12.13     | + |
| chr4 | 12919405 | 12919466 | CSAR_peak_! | 6.03,6.57      | + |
| chr4 | 12927217 | 12927257 | CSAR_peak_! | 7.92           | + |



|      |          |          |             |                |   |
|------|----------|----------|-------------|----------------|---|
| chr4 | 12928210 | 12928262 | CSAR_peak_! | 7.27           | + |
| chr4 | 12974422 | 12974457 | CSAR_peak_! | 7.27           | + |
| chr4 | 13024614 | 13024678 | CSAR_peak_: | 8.65,9.27      | + |
| chr4 | 13025139 | 13025184 | CSAR_peak_! | 16.25          | + |
| chr4 | 13025199 | 13025284 | CSAR_peak_: | 23,16.36       | + |
| chr4 | 13025318 | 13025364 | CSAR_peak_! | 8.39           | + |
| chr4 | 13025461 | 13025662 | CSAR_peak_: | 8.95,27.64,6.  | + |
| chr4 | 13025737 | 13025788 | CSAR_peak_! | 9.61           | + |
| chr4 | 13025854 | 13025922 | CSAR_peak_! | 8.39           | + |
| chr4 | 13025941 | 13025984 | CSAR_peak_: | 6.52           | + |
| chr4 | 13025987 | 13026040 | CSAR_peak_: | 12.17,8.95     | + |
| chr4 | 13026056 | 13026097 | CSAR_peak_: | 8.65           | + |
| chr4 | 13026121 | 13026200 | CSAR_peak_: | 35.03,24.32    | + |
| chr4 | 13026323 | 13026390 | CSAR_peak_! | 8.44           | + |
| chr4 | 13026446 | 13026499 | CSAR_peak_! | 12.17,6.21     | + |
| chr4 | 13026547 | 13026641 | CSAR_peak_! | 8.12,5.65,13.  | + |
| chr4 | 13026665 | 13026742 | CSAR_peak_! | 6.57           | + |
| chr4 | 13026789 | 13026848 | CSAR_peak_! | 7.61           | + |
| chr4 | 13026898 | 13027133 | CSAR_peak_! | 12.13,20.05,(+ |   |
| chr4 | 13027168 | 13027351 | CSAR_peak_: | 5.62,7.27,6.5  | + |
| chr4 | 13028304 | 13028414 | CSAR_peak_! | 8.28,12.13     | + |
| chr4 | 13028417 | 13028472 | CSAR_peak_! | 9.77           | + |
| chr4 | 13028510 | 13028551 | CSAR_peak_! | 6.21           | + |
| chr4 | 13029116 | 13029178 | CSAR_peak_! | 6.44           | + |
| chr4 | 13030430 | 13030514 | CSAR_peak_! | 10.95          | + |
| chr4 | 13030667 | 13030774 | CSAR_peak_! | 6.44,7.58      | + |
| chr4 | 13031220 | 13031292 | CSAR_peak_! | 7.27           | + |
| chr4 | 13075565 | 13075601 | CSAR_peak_: | 6.36           | + |
| chr4 | 13075604 | 13075636 | CSAR_peak_: | 8.28,9.61      | + |
| chr4 | 13128766 | 13128792 | CSAR_peak_! | 6.21           | + |
| chr4 | 13158447 | 13158488 | CSAR_peak_! | 9.58           | + |
| chr4 | 13163073 | 13163119 | CSAR_peak_! | 7.27           | + |
| chr4 | 13179393 | 13179434 | CSAR_peak_: | 10.02          | + |
| chr4 | 13179956 | 13180013 | CSAR_peak_! | 16.33,6.21     | + |
| chr4 | 13180351 | 13180389 | CSAR_peak_: | 6.57           | + |
| chr4 | 13183007 | 13183049 | CSAR_peak_! | 6.21           | + |
| chr4 | 13184685 | 13184713 | CSAR_peak_! | 7.27           | + |
| chr4 | 13184953 | 13184995 | CSAR_peak_! | 6.21           | + |
| chr4 | 13185278 | 13185358 | CSAR_peak_! | 7.27,8.39      | + |
| chr4 | 13186024 | 13186051 | CSAR_peak_! | 6.21           | + |
| chr4 | 13186821 | 13186882 | CSAR_peak_! | 8.39           | + |
| chr4 | 13187449 | 13187497 | CSAR_peak_! | 6.21           | + |

|      |          |          |             |               |   |
|------|----------|----------|-------------|---------------|---|
| chr4 | 13188382 | 13188454 | CSAR_peak_  | 7.26,7.58     | + |
| chr4 | 13188647 | 13188722 | CSAR_peak_  | 12.17,10.02   | + |
| chr4 | 13189856 | 13189899 | CSAR_peak_  | 6.57          | + |
| chr4 | 13364308 | 13364358 | CSAR_peak_  | 8.39          | + |
| chr4 | 13385154 | 13385212 | CSAR_peak_! | 10.95         | + |
| chr4 | 13385543 | 13385571 | CSAR_peak_! | 13.48         | + |
| chr4 | 13385575 | 13385628 | CSAR_peak_  | 12.13,7.27    | + |
| chr4 | 13385915 | 13385959 | CSAR_peak_  | 5.62,9.77     | + |
| chr4 | 13386134 | 13386222 | CSAR_peak_  | 12.17,12.31,  | + |
| chr4 | 13387022 | 13387073 | CSAR_peak_! | 6.21          | + |
| chr4 | 13426199 | 13426245 | CSAR_peak_  | 7.27          | + |
| chr4 | 13464094 | 13464157 | CSAR_peak_  | 7.92          | + |
| chr4 | 13464597 | 13464689 | CSAR_peak_! | 23.49,10.7,1  | + |
| chr4 | 13464796 | 13464836 | CSAR_peak_! | 8.39          | + |
| chr4 | 13466324 | 13466384 | CSAR_peak_  | 7.58          | + |
| chr4 | 13466608 | 13466709 | CSAR_peak_  | 6.21,10.18    | + |
| chr4 | 13466808 | 13466813 | CSAR_peak_  | 6.95          | + |
| chr4 | 13467142 | 13467294 | CSAR_peak_  | 6.21,8.39     | + |
| chr4 | 13516444 | 13516502 | CSAR_peak_! | 6.21          | + |
| chr4 | 13517437 | 13517500 | CSAR_peak_  | 7.27          | + |
| chr4 | 13519306 | 13519381 | CSAR_peak_  | 9.58          | + |
| chr4 | 13543330 | 13543372 | CSAR_peak_  | 10.83         | + |
| chr4 | 13544798 | 13544846 | CSAR_peak_  | 6.95          | + |
| chr4 | 13545938 | 13546008 | CSAR_peak_  | 6.95,11.63    | + |
| chr4 | 13546380 | 13546461 | CSAR_peak_! | 14.88,12.31   | + |
| chr4 | 13546582 | 13546650 | CSAR_peak_  | 7.34          | + |
| chr4 | 13547138 | 13547214 | CSAR_peak_  | 18.73,9.03    | + |
| chr4 | 13547734 | 13547776 | CSAR_peak_  | 6.22          | + |
| chr4 | 13547983 | 13548035 | CSAR_peak_! | 6.21          | + |
| chr4 | 13591342 | 13591417 | CSAR_peak_! | 9.77,13.51    | + |
| chr4 | 13675791 | 13675940 | CSAR_peak_! | 8.39,7.35,23. | + |
| chr4 | 13675973 | 13676028 | CSAR_peak_! | 8.39          | + |
| chr4 | 13676073 | 13676114 | CSAR_peak_  | 17.51,13      | + |
| chr4 | 13676160 | 13676362 | CSAR_peak_  | 37.87,8.39,4  | + |
| chr4 | 13676364 | 13676438 | CSAR_peak_  | 48.77,20.94,  | + |
| chr4 | 13676448 | 13676586 | CSAR_peak_  | 16.05,8.94,4  | + |
| chr4 | 13676931 | 13676948 | CSAR_peak_! | 6.21          | + |
| chr4 | 13702001 | 13702052 | CSAR_peak_  | 6.03          | + |
| chr4 | 13719998 | 13720062 | CSAR_peak_! | 10.95,6.57    | + |
| chr4 | 13721057 | 13721103 | CSAR_peak_  | 8.65          | + |
| chr4 | 13725842 | 13725977 | CSAR_peak_! | 8.28,16.33    | + |
| chr4 | 13726046 | 13726222 | CSAR_peak_  | 13.48,9.27    | + |

|      |          |          |             |                 |
|------|----------|----------|-------------|-----------------|
| chr4 | 13726364 | 13726581 | CSAR_peak_  | 19.36,7.34,14.4 |
| chr4 | 13726806 | 13726859 | CSAR_peak_! | 7.27 +          |
| chr4 | 13727066 | 13727105 | CSAR_peak_: | 7.11 +          |
| chr4 | 13727106 | 13727163 | CSAR_peak_! | 19.36 +         |
| chr4 | 13734042 | 13734083 | CSAR_peak_! | 6.57 +          |
| chr4 | 13737396 | 13737446 | CSAR_peak_! | 8.39 +          |
| chr4 | 13739150 | 13739237 | CSAR_peak_! | 6.21,6.21 +     |
| chr4 | 13743583 | 13743636 | CSAR_peak_: | 9.58 +          |
| chr4 | 13743907 | 13743977 | CSAR_peak_! | 13.66,16.34 +   |
| chr4 | 13744052 | 13744182 | CSAR_peak_! | 7.27,10.33 +    |
| chr4 | 13744331 | 13744418 | CSAR_peak_! | 13.44,12.31 +   |
| chr4 | 13744424 | 13744818 | CSAR_peak_: | 8.12,13.66,14.4 |
| chr4 | 13744897 | 13744986 | CSAR_peak_! | 8.12,17.88 +    |
| chr4 | 13745014 | 13745093 | CSAR_peak_! | 10.83,6.51 +    |
| chr4 | 13745118 | 13745131 | CSAR_peak_! | 6.03 +          |
| chr4 | 13745266 | 13745433 | CSAR_peak_: | 14.88,8.52,14.4 |
| chr4 | 13745459 | 13745520 | CSAR_peak_! | 12.17,6.94,14.4 |
| chr4 | 13745581 | 13745749 | CSAR_peak_! | 8.39,17.28,7.4  |
| chr4 | 13809974 | 13810080 | CSAR_peak_! | 15 +            |
| chr4 | 13810557 | 13810606 | CSAR_peak_: | 8.65 +          |
| chr4 | 13810826 | 13810906 | CSAR_peak_! | 13.44 +         |
| chr4 | 13811744 | 13811783 | CSAR_peak_! | 6.21 +          |
| chr4 | 13812272 | 13812330 | CSAR_peak_: | 7.58,8.65 +     |
| chr4 | 13831175 | 13831219 | CSAR_peak_: | 11.34 +         |
| chr4 | 13831238 | 13831294 | CSAR_peak_: | 5.97,8.95 +     |
| chr4 | 13831435 | 13831485 | CSAR_peak_: | 8.39 +          |
| chr4 | 13831613 | 13831684 | CSAR_peak_: | 10.95,6.57 +    |
| chr4 | 13831761 | 13831830 | CSAR_peak_: | 10.96,21.45 +   |
| chr4 | 13832035 | 13832121 | CSAR_peak_! | 6.57,7.73,6.8   |
| chr4 | 13832262 | 13832285 | CSAR_peak_! | 7.7 +           |
| chr4 | 13832310 | 13832457 | CSAR_peak_: | 11.47,8.69,5.4  |
| chr4 | 13832604 | 13832650 | CSAR_peak_! | 6.21 +          |
| chr4 | 13832752 | 13832968 | CSAR_peak_! | 8.39,21.94,21.4 |
| chr4 | 13833200 | 13833258 | CSAR_peak_: | 6.03,6.57 +     |
| chr4 | 13833265 | 13833373 | CSAR_peak_: | 18.72,15.28 +   |
| chr4 | 13833441 | 13833512 | CSAR_peak_: | 18.72,21.87 +   |
| chr4 | 13833581 | 13833683 | CSAR_peak_: | 17.52,11.14 +   |
| chr4 | 13833962 | 13834112 | CSAR_peak_: | 7.27,15.23 +    |
| chr4 | 13834142 | 13834195 | CSAR_peak_! | 9.77 +          |
| chr4 | 13834256 | 13834304 | CSAR_peak_! | 8.39 +          |
| chr4 | 13834501 | 13834587 | CSAR_peak_: | 14.88,12.13 +   |
| chr4 | 13834768 | 13834799 | CSAR_peak_! | 8.39 +          |

|      |          |          |             |              |   |
|------|----------|----------|-------------|--------------|---|
| chr4 | 13834932 | 13834976 | CSAR_peak_! | 6.21,7.58    | + |
| chr4 | 13834989 | 13835056 | CSAR_peak_! | 16.11        | + |
| chr4 | 13835167 | 13835225 | CSAR_peak_! | 7.27         | + |
| chr4 | 13835526 | 13835571 | CSAR_peak_! | 6.21         | + |
| chr4 | 13835685 | 13835774 | CSAR_peak_! | 8.39         | + |
| chr4 | 13835935 | 13835985 | CSAR_peak_! | 17.82,7.58   | + |
| chr4 | 13835998 | 13836048 | CSAR_peak_! | 7.2          | + |
| chr4 | 13836055 | 13836128 | CSAR_peak_! | 16.11,6.21   | + |
| chr4 | 13836277 | 13836382 | CSAR_peak_! | 14.76        | + |
| chr4 | 13836678 | 13836724 | CSAR_peak_! | 8.39         | + |
| chr4 | 13836930 | 13836956 | CSAR_peak_! | 6.57         | + |
| chr4 | 13849092 | 13849168 | CSAR_peak_! | 9.77         | + |
| chr4 | 13849549 | 13849623 | CSAR_peak_! | 10.83,11.14  | + |
| chr4 | 13873922 | 13873974 | CSAR_peak_! | 9.58         | + |
| chr4 | 13874297 | 13874382 | CSAR_peak_! | 8.39         | + |
| chr4 | 13874998 | 13875038 | CSAR_peak_! | 6.21         | + |
| chr4 | 13879268 | 13879341 | CSAR_peak_! | 16.33,6.57   | + |
| chr4 | 13880170 | 13880220 | CSAR_peak_! | 6.21,8.65    | + |
| chr4 | 13881348 | 13881402 | CSAR_peak_! | 12.13        | + |
| chr4 | 13881437 | 13881476 | CSAR_peak_! | 6.21         | + |
| chr4 | 13881994 | 13882064 | CSAR_peak_! | 10.83        | + |
| chr4 | 13882205 | 13882233 | CSAR_peak_! | 8.65         | + |
| chr4 | 13882630 | 13882706 | CSAR_peak_! | 6.21         | + |
| chr4 | 13897443 | 13897493 | CSAR_peak_! | 6.21,7.58    | + |
| chr4 | 13942025 | 13942119 | CSAR_peak_! | 8.39         | + |
| chr4 | 13992312 | 13992458 | CSAR_peak_! | 5.82,103.91, | + |
| chr4 | 14014982 | 14015031 | CSAR_peak_! | 7.27         | + |
| chr4 | 14015082 | 14015128 | CSAR_peak_! | 6.21         | + |
| chr4 | 14015226 | 14015305 | CSAR_peak_! | 7.27,5.95    | + |
| chr4 | 14015391 | 14015440 | CSAR_peak_! | 7.27         | + |
| chr4 | 14015457 | 14015547 | CSAR_peak_! | 13           | + |
| chr4 | 14015630 | 14015684 | CSAR_peak_! | 9.58,6.21    | + |
| chr4 | 14015884 | 14015971 | CSAR_peak_! | 7.58         | + |
| chr4 | 14016293 | 14016345 | CSAR_peak_! | 9.58         | + |
| chr4 | 14035092 | 14035141 | CSAR_peak_! | 6.57         | + |
| chr4 | 14040553 | 14040619 | CSAR_peak_! | 6.57         | + |
| chr4 | 14049237 | 14049278 | CSAR_peak_! | 9.58         | + |
| chr4 | 14049371 | 14049434 | CSAR_peak_! | 11.14        | + |
| chr4 | 14060015 | 14060080 | CSAR_peak_! | 7.27         | + |
| chr4 | 14109957 | 14110007 | CSAR_peak_! | 6.57         | + |
| chr4 | 14121597 | 14121693 | CSAR_peak_! | 8.39         | + |
| chr4 | 14130032 | 14130093 | CSAR_peak_! | 6.21         | + |

|      |          |          |             |                |   |
|------|----------|----------|-------------|----------------|---|
| chr4 | 14130114 | 14130164 | CSAR_peak_4 | 6.57           | + |
| chr4 | 14174663 | 14174721 | CSAR_peak_4 | 16.05          | + |
| chr4 | 14175145 | 14175214 | CSAR_peak_4 | 7.27           | + |
| chr4 | 14178325 | 14178390 | CSAR_peak_4 | 9.77           | + |
| chr4 | 14179368 | 14179455 | CSAR_peak_4 | 16.11          | + |
| chr4 | 14180212 | 14180297 | CSAR_peak_4 | 24.52,8.13     | + |
| chr4 | 14180799 | 14180865 | CSAR_peak_4 | 7.92           | + |
| chr4 | 14180961 | 14180985 | CSAR_peak_4 | 7.27           | + |
| chr4 | 14211631 | 14211713 | CSAR_peak_4 | 6.21           | + |
| chr4 | 14246338 | 14246424 | CSAR_peak_4 | 8.39,8.28      | + |
| chr4 | 14246766 | 14246802 | CSAR_peak_4 | 8.95           | + |
| chr4 | 14249614 | 14249725 | CSAR_peak_4 | 13.48,8.39     | + |
| chr4 | 14251799 | 14251836 | CSAR_peak_4 | 6.57           | + |
| chr4 | 14252361 | 14252421 | CSAR_peak_4 | 9.58,6.95      | + |
| chr4 | 14252524 | 14252585 | CSAR_peak_4 | 7.68,10.18     | + |
| chr4 | 14252711 | 14252732 | CSAR_peak_4 | 7.92           | + |
| chr4 | 14252858 | 14252915 | CSAR_peak_4 | 6.21           | + |
| chr4 | 14253421 | 14253487 | CSAR_peak_4 | 7.27           | + |
| chr4 | 14253633 | 14253688 | CSAR_peak_4 | 16.11,11.66,(+ |   |
| chr4 | 14275209 | 14275280 | CSAR_peak_4 | 8.95,6.85      | + |
| chr4 | 14275289 | 14275347 | CSAR_peak_4 | 13.66,10.94,(+ |   |
| chr4 | 14305186 | 14305288 | CSAR_peak_4 | 10.95          | + |
| chr4 | 14312436 | 14312487 | CSAR_peak_4 | 5.62           | + |
| chr4 | 14313126 | 14313182 | CSAR_peak_4 | 10.83          | + |
| chr4 | 14313874 | 14313914 | CSAR_peak_4 | 6.95           | + |
| chr4 | 14381357 | 14381441 | CSAR_peak_4 | 12.74,7.7      | + |
| chr4 | 14381739 | 14381784 | CSAR_peak_4 | 11.99,14.76    | + |
| chr4 | 14382030 | 14382069 | CSAR_peak_4 | 8.9            | + |
| chr4 | 14382148 | 14382165 | CSAR_peak_4 | 8.5            | + |
| chr4 | 14384370 | 14384433 | CSAR_peak_4 | 13.48,8.39     | + |
| chr4 | 14387710 | 14387754 | CSAR_peak_4 | 6.21           | + |
| chr4 | 14450846 | 14450874 | CSAR_peak_4 | 8.39           | + |
| chr4 | 14491715 | 14491778 | CSAR_peak_4 | 11.38          | + |
| chr4 | 14570891 | 14570963 | CSAR_peak_4 | 8.39           | + |
| chr4 | 14579956 | 14580010 | CSAR_peak_4 | 16.33,7.26     | + |
| chr4 | 14580017 | 14580059 | CSAR_peak_4 | 7.11,7.85      | + |
| chr4 | 14580121 | 14580277 | CSAR_peak_4 | 17.87,7.58     | + |
| chr4 | 14580406 | 14580526 | CSAR_peak_4 | 23.31          | + |
| chr4 | 14580549 | 14580602 | CSAR_peak_4 | 17.87          | + |
| chr4 | 14580685 | 14580716 | CSAR_peak_4 | 6.57           | + |
| chr4 | 14580801 | 14580982 | CSAR_peak_4 | 13.66,13.92    | + |
| chr4 | 14581021 | 14581048 | CSAR_peak_4 | 10.31          | + |

|      |          |          |             |                  |   |
|------|----------|----------|-------------|------------------|---|
| chr4 | 14581102 | 14581170 | CSAR_peak_! | 19.01,17.84      | + |
| chr4 | 14581175 | 14581277 | CSAR_peak_! | 13.01,8.8        | + |
| chr4 | 14581292 | 14581372 | CSAR_peak_! | 12.21,8.02       | + |
| chr4 | 14581445 | 14581493 | CSAR_peak_! | 12.17            | + |
| chr4 | 14581542 | 14581646 | CSAR_peak_! | 8.84,9.58        | + |
| chr4 | 14583118 | 14583173 | CSAR_peak_! | 7.27             | + |
| chr4 | 14584206 | 14584254 | CSAR_peak_! | 10.31            | + |
| chr4 | 14584922 | 14584962 | CSAR_peak_! | 6.21,6.21        | + |
| chr4 | 14585390 | 14585438 | CSAR_peak_! | 7.26             | + |
| chr4 | 14585643 | 14585707 | CSAR_peak_! | 13.85,9.32,10.31 | + |
| chr4 | 14585882 | 14585930 | CSAR_peak_! | 13.51,12.13      | + |
| chr4 | 14585994 | 14586094 | CSAR_peak_! | 7.26,10.94,10.31 | + |
| chr4 | 14586355 | 14586418 | CSAR_peak_! | 8.39             | + |
| chr4 | 14586554 | 14586609 | CSAR_peak_! | 10.83            | + |
| chr4 | 14586619 | 14586715 | CSAR_peak_! | 14.76            | + |
| chr4 | 14586896 | 14586969 | CSAR_peak_! | 6.94             | + |
| chr4 | 14587083 | 14587176 | CSAR_peak_! | 24.21,8.39       | + |
| chr4 | 14587276 | 14587324 | CSAR_peak_! | 12.74            | + |
| chr4 | 14587830 | 14587880 | CSAR_peak_! | 6.21             | + |
| chr4 | 14588066 | 14588180 | CSAR_peak_! | 11.28,11.14      | + |
| chr4 | 14588194 | 14588236 | CSAR_peak_! | 6.57             | + |
| chr4 | 14588387 | 14588464 | CSAR_peak_! | 8.39,14.88,6.57  | + |
| chr4 | 14588514 | 14588573 | CSAR_peak_! | 6.57,7.27        | + |
| chr4 | 14588576 | 14588586 | CSAR_peak_! | 7.27             | + |
| chr4 | 14588590 | 14588650 | CSAR_peak_! | 8.65             | + |
| chr4 | 14588760 | 14588798 | CSAR_peak_! | 6.57             | + |
| chr4 | 14588828 | 14588899 | CSAR_peak_! | 10.83,8.3,10.31  | + |
| chr4 | 14588993 | 14589051 | CSAR_peak_! | 12.27,17.4       | + |
| chr4 | 14589153 | 14589210 | CSAR_peak_! | 9.58             | + |
| chr4 | 14589319 | 14589354 | CSAR_peak_! | 8.39             | + |
| chr4 | 14589579 | 14589655 | CSAR_peak_! | 11.99            | + |
| chr4 | 14589660 | 14589719 | CSAR_peak_! | 11.14,5.9        | + |
| chr4 | 14589839 | 14589907 | CSAR_peak_! | 8.39,8.39        | + |
| chr4 | 14610341 | 14610378 | CSAR_peak_! | 7.27             | + |
| chr4 | 14657765 | 14657814 | CSAR_peak_! | 7.27,9.77        | + |
| chr4 | 14657949 | 14658027 | CSAR_peak_! | 10.02            | + |
| chr4 | 14658117 | 14658149 | CSAR_peak_! | 6.57             | + |
| chr4 | 14658440 | 14658538 | CSAR_peak_! | 7.27             | + |
| chr4 | 14658777 | 14658906 | CSAR_peak_! | 6.54,8.65,16.33  | + |
| chr4 | 14659453 | 14659545 | CSAR_peak_! | 19.36            | + |
| chr4 | 14659673 | 14659721 | CSAR_peak_! | 16.33,7.27       | + |
| chr4 | 14659885 | 14659978 | CSAR_peak_! | 6.45,14.88       | + |

|      |          |          |             |               |   |
|------|----------|----------|-------------|---------------|---|
| chr4 | 14660031 | 14660129 | CSAR_peak_  | 30.21,19.18   | + |
| chr4 | 14660215 | 14660264 | CSAR_peak_  | 8.39          | + |
| chr4 | 14714047 | 14714206 | CSAR_peak_  | 6.57,7.73,6.2 | + |
| chr4 | 14714343 | 14714391 | CSAR_peak_! | 6.21          | + |
| chr4 | 14714519 | 14714759 | CSAR_peak_  | 7.29,16.33,1  | + |
| chr4 | 14714795 | 14714854 | CSAR_peak_! | 9.58          | + |
| chr4 | 14715215 | 14715282 | CSAR_peak_! | 9.61,6.95     | + |
| chr4 | 14715340 | 14715425 | CSAR_peak_  | 8.28,5.79     | + |
| chr4 | 14716189 | 14716218 | CSAR_peak_  | 7.73          | + |
| chr4 | 14716514 | 14716584 | CSAR_peak_  | 7.27,8.39,6.5 | + |
| chr4 | 14716709 | 14716744 | CSAR_peak_! | 8.39          | + |
| chr4 | 14716889 | 14716938 | CSAR_peak_! | 8.39          | + |
| chr4 | 14718637 | 14718713 | CSAR_peak_  | 6.95          | + |
| chr4 | 14718767 | 14718845 | CSAR_peak_! | 6.57,8.28     | + |
| chr4 | 14718937 | 14718958 | CSAR_peak_! | 7.27,6.44     | + |
| chr4 | 14719771 | 14719842 | CSAR_peak_  | 14.76,11.38   | + |
| chr4 | 14721720 | 14721777 | CSAR_peak_! | 8.39          | + |
| chr4 | 14753723 | 14753767 | CSAR_peak_  | 5.62,6.57     | + |
| chr4 | 14755166 | 14755268 | CSAR_peak_  | 10.83,6.57    | + |
| chr4 | 14755467 | 14755506 | CSAR_peak_! | 6.57          | + |
| chr4 | 14756086 | 14756146 | CSAR_peak_  | 10.02,6.21    | + |
| chr4 | 14756156 | 14756220 | CSAR_peak_! | 9.35,7.58,6.2 | + |
| chr4 | 14756508 | 14756542 | CSAR_peak_  | 8.65          | + |
| chr4 | 14757039 | 14757050 | CSAR_peak_  | 7.27          | + |
| chr4 | 14757128 | 14757176 | CSAR_peak_  | 8.13          | + |
| chr4 | 14757354 | 14757390 | CSAR_peak_! | 7.27          | + |
| chr4 | 14757545 | 14757635 | CSAR_peak_  | 8.65,6.57     | + |
| chr4 | 14757908 | 14757963 | CSAR_peak_  | 7.27          | + |
| chr4 | 14763772 | 14763847 | CSAR_peak_  | 6.95,7.34     | + |
| chr4 | 14797140 | 14797178 | CSAR_peak_  | 7.27          | + |
| chr4 | 14797217 | 14797272 | CSAR_peak_  | 6.21,8.39     | + |
| chr4 | 14797346 | 14797404 | CSAR_peak_  | 8.5           | + |
| chr4 | 14797483 | 14797542 | CSAR_peak_  | 6.31          | + |
| chr4 | 14797641 | 14797679 | CSAR_peak_  | 7.27          | + |
| chr4 | 14797792 | 14797827 | CSAR_peak_  | 5.62          | + |
| chr4 | 14797862 | 14797897 | CSAR_peak_  | 10.31,6.57    | + |
| chr4 | 14798158 | 14798242 | CSAR_peak_! | 9.97,9.58     | + |
| chr4 | 14798464 | 14798523 | CSAR_peak_! | 10.33         | + |
| chr4 | 14798659 | 14798704 | CSAR_peak_  | 7.13,5.7      | + |
| chr4 | 14798733 | 14798798 | CSAR_peak_  | 6.57          | + |
| chr4 | 14798826 | 14798925 | CSAR_peak_  | 8.13          | + |
| chr4 | 14799328 | 14799349 | CSAR_peak_! | 7.27          | + |

|      |          |          |             |               |   |
|------|----------|----------|-------------|---------------|---|
| chr4 | 14799550 | 14799585 | CSAR_peak_  | 8.28          | + |
| chr4 | 14799888 | 14799955 | CSAR_peak_! | 6.21,7.26     | + |
| chr4 | 14799967 | 14800020 | CSAR_peak_! | 7.92,7.53     | + |
| chr4 | 14800093 | 14800231 | CSAR_peak_  | 21.24,6.95,1! | + |
| chr4 | 14800295 | 14800332 | CSAR_peak_! | 11.28         | + |
| chr4 | 14832833 | 14832868 | CSAR_peak_  | 6.03          | + |
| chr4 | 14833055 | 14833178 | CSAR_peak_: | 17.51,7.29    | + |
| chr4 | 14849491 | 14849591 | CSAR_peak_! | 16.33,6.95,6. | + |
| chr4 | 14849633 | 14849735 | CSAR_peak_! | 11.38,7.27    | + |
| chr4 | 14849917 | 14850042 | CSAR_peak_! | 12.31,9.03,9. | + |
| chr4 | 14850157 | 14850207 | CSAR_peak_! | 12.13         | + |
| chr4 | 14850238 | 14850327 | CSAR_peak_  | 13.48,10.95   | + |
| chr4 | 14850402 | 14850456 | CSAR_peak_! | 6.21          | + |
| chr4 | 14850744 | 14850802 | CSAR_peak_: | 8.09          | + |
| chr4 | 14894761 | 14894811 | CSAR_peak_: | 6.57          | + |
| chr4 | 14894866 | 14894913 | CSAR_peak_  | 7.58          | + |
| chr4 | 14895761 | 14895808 | CSAR_peak_  | 8.39          | + |
| chr4 | 14895858 | 14895911 | CSAR_peak_! | 8.39          | + |
| chr4 | 14896413 | 14896455 | CSAR_peak_: | 6.03          | + |
| chr4 | 14897744 | 14897794 | CSAR_peak_: | 8.65          | + |
| chr4 | 14898325 | 14898369 | CSAR_peak_  | 7.27          | + |
| chr4 | 14920628 | 14920707 | CSAR_peak_  | 12.13,17.1    | + |
| chr4 | 14920731 | 14920882 | CSAR_peak_! | 12.17,14.63   | + |
| chr4 | 14921483 | 14921499 | CSAR_peak_! | 6.21          | + |
| chr4 | 14921559 | 14921649 | CSAR_peak_  | 9.49          | + |
| chr4 | 14921742 | 14921830 | CSAR_peak_! | 6.21,21.56,1! | + |
| chr4 | 14922062 | 14922222 | CSAR_peak_! | 9.58,20.43    | + |
| chr4 | 14954457 | 14954532 | CSAR_peak_  | 12.13         | + |
| chr4 | 14954561 | 14954672 | CSAR_peak_! | 13.48,10.83   | + |
| chr4 | 14955788 | 14955841 | CSAR_peak_! | 8.39          | + |
| chr4 | 14955856 | 14955928 | CSAR_peak_  | 9.58          | + |
| chr4 | 14956188 | 14956276 | CSAR_peak_: | 6.03          | + |
| chr4 | 14961103 | 14961132 | CSAR_peak_  | 8.39          | + |
| chr4 | 14961580 | 14961721 | CSAR_peak_! | 12.13,5.62,1! | + |
| chr4 | 14961805 | 14961856 | CSAR_peak_! | 9.32          | + |
| chr4 | 14961949 | 14962020 | CSAR_peak_  | 8.28          | + |
| chr4 | 14962023 | 14962056 | CSAR_peak_  | 17.82         | + |
| chr4 | 14962101 | 14962144 | CSAR_peak_! | 6.21          | + |
| chr4 | 14962161 | 14962263 | CSAR_peak_  | 9.58          | + |
| chr4 | 14982812 | 14982882 | CSAR_peak_  | 7.26          | + |
| chr4 | 14990601 | 14990651 | CSAR_peak_  | 6.21          | + |
| chr4 | 14991292 | 14991410 | CSAR_peak_  | 7.58,7.58     | + |



|      |          |          |             |                |   |
|------|----------|----------|-------------|----------------|---|
| chr4 | 14992139 | 14992191 | CSAR_peak_4 | 6.21           | + |
| chr4 | 15098919 | 15098968 | CSAR_peak_! | 10.83          | + |
| chr4 | 15100124 | 15100219 | CSAR_peak_: | 54.09,6.03,5(+ |   |
| chr4 | 15100377 | 15100553 | CSAR_peak_: | 27.87,10.67,;  | + |
| chr4 | 15101521 | 15101544 | CSAR_peak_! | 6.21           | + |
| chr4 | 15102120 | 15102259 | CSAR_peak_4 | 13.48,8.39     | + |
| chr4 | 15103413 | 15103481 | CSAR_peak_4 | 10.83          | + |
| chr4 | 15104041 | 15104108 | CSAR_peak_! | 7.27           | + |
| chr4 | 15104179 | 15104339 | CSAR_peak_4 | 10.99,16.33    | + |
| chr4 | 15104381 | 15104459 | CSAR_peak_4 | 16.11,9.58     | + |
| chr4 | 15104491 | 15104548 | CSAR_peak_4 | 7.27           | + |
| chr4 | 15104755 | 15104786 | CSAR_peak_! | 6.1            | + |
| chr4 | 15105530 | 15105587 | CSAR_peak_! | 11.14          | + |
| chr4 | 15105657 | 15105719 | CSAR_peak_: | 10.02          | + |
| chr4 | 15108095 | 15108128 | CSAR_peak_: | 6.57           | + |
| chr4 | 15115257 | 15115311 | CSAR_peak_! | 10.83          | + |
| chr4 | 15130541 | 15130614 | CSAR_peak_! | 6.21           | + |
| chr4 | 15149956 | 15150008 | CSAR_peak_: | 7.34           | + |
| chr4 | 15158642 | 15158699 | CSAR_peak_4 | 12.13          | + |
| chr4 | 15187064 | 15187142 | CSAR_peak_! | 12.13          | + |
| chr4 | 15187402 | 15187451 | CSAR_peak_4 | 8.39           | + |
| chr4 | 15188088 | 15188138 | CSAR_peak_4 | 9.77           | + |
| chr4 | 15190660 | 15190706 | CSAR_peak_: | 7.92           | + |
| chr4 | 15206474 | 15206525 | CSAR_peak_! | 8.39           | + |
| chr4 | 15206643 | 15206732 | CSAR_peak_4 | 10.95          | + |
| chr4 | 15219315 | 15219356 | CSAR_peak_: | 7.26           | + |
| chr4 | 15244954 | 15244997 | CSAR_peak_: | 6.44           | + |
| chr4 | 15297051 | 15297112 | CSAR_peak_! | 20.94,17.51    | + |
| chr4 | 15299065 | 15299123 | CSAR_peak_! | 8.39           | + |
| chr4 | 15299308 | 15299372 | CSAR_peak_4 | 13.48          | + |
| chr4 | 15299795 | 15299859 | CSAR_peak_: | 6.57           | + |
| chr4 | 15301118 | 15301159 | CSAR_peak_: | 5.62           | + |
| chr4 | 15302000 | 15302056 | CSAR_peak_! | 8.39           | + |
| chr4 | 15302402 | 15302490 | CSAR_peak_4 | 8.39,17.51     | + |
| chr4 | 15304570 | 15304628 | CSAR_peak_: | 10.02          | + |
| chr4 | 15307034 | 15307072 | CSAR_peak_: | 12.5           | + |
| chr4 | 15307477 | 15307549 | CSAR_peak_: | 7.58,26.05     | + |
| chr4 | 15307565 | 15307628 | CSAR_peak_4 | 10.02          | + |
| chr4 | 15308049 | 15308122 | CSAR_peak_: | 6.95,6.44,6.5+ |   |
| chr4 | 15376379 | 15376426 | CSAR_peak_: | 5.67,10.83     | + |
| chr4 | 15376700 | 15376747 | CSAR_peak_: | 5.62           | + |
| chr4 | 15376769 | 15376798 | CSAR_peak_4 | 8.65           | + |

|      |          |          |            |               |   |
|------|----------|----------|------------|---------------|---|
| chr4 | 15383216 | 15383260 | CSAR_peak_ | 6.57          | + |
| chr4 | 15383525 | 15383583 | CSAR_peak_ | 34.93,13.92,  | + |
| chr4 | 15383653 | 15383747 | CSAR_peak_ | 16.33,8.95    | + |
| chr4 | 15383750 | 15384001 | CSAR_peak_ | 11.38,13.29,  | + |
| chr4 | 15384045 | 15384085 | CSAR_peak_ | 7.73          | + |
| chr4 | 15384117 | 15384233 | CSAR_peak_ | 33.75,31.65,  | + |
| chr4 | 15384241 | 15384321 | CSAR_peak_ | 8.53,10.7     | + |
| chr4 | 15384368 | 15384412 | CSAR_peak_ | 8.39          | + |
| chr4 | 15384443 | 15384550 | CSAR_peak_ | 7.92,12.17,1  | + |
| chr4 | 15384609 | 15384676 | CSAR_peak_ | 10.31         | + |
| chr4 | 15384702 | 15384764 | CSAR_peak_ | 10.95,11.96   | + |
| chr4 | 15384767 | 15384851 | CSAR_peak_ | 6.57          | + |
| chr4 | 15466897 | 15466980 | CSAR_peak_ | 20.82,35.2,1  | + |
| chr4 | 15467095 | 15467179 | CSAR_peak_ | 41.53,37.66,  | + |
| chr4 | 15484554 | 15484604 | CSAR_peak_ | 6.95          | + |
| chr4 | 15487974 | 15488026 | CSAR_peak_ | 17.82,16.54   | + |
| chr4 | 15488139 | 15488236 | CSAR_peak_ | 7.73,9.72     | + |
| chr4 | 15488274 | 15488364 | CSAR_peak_ | 12.5,6.44     | + |
| chr4 | 15488482 | 15488537 | CSAR_peak_ | 8.95          | + |
| chr4 | 15488674 | 15488798 | CSAR_peak_ | 23.41         | + |
| chr4 | 15488943 | 15489068 | CSAR_peak_ | 27.11,16.54,  | + |
| chr4 | 15489075 | 15489126 | CSAR_peak_ | 13.44         | + |
| chr4 | 15489194 | 15489217 | CSAR_peak_ | 6.57          | + |
| chr4 | 15489348 | 15489552 | CSAR_peak_ | 10.83,16.14,  | + |
| chr4 | 15489565 | 15489728 | CSAR_peak_ | 16.33,14.85,  | + |
| chr4 | 15490871 | 15490982 | CSAR_peak_ | 8.95,6.52     | + |
| chr4 | 15491224 | 15491298 | CSAR_peak_ | 7.58,9.97,8.2 | + |
| chr4 | 15491965 | 15492088 | CSAR_peak_ | 20.13,22.56   | + |
| chr4 | 15492378 | 15492410 | CSAR_peak_ | 13.44         | + |
| chr4 | 15492505 | 15492589 | CSAR_peak_ | 13.44,11.83,  | + |
| chr4 | 15492647 | 15492728 | CSAR_peak_ | 18.65,16.08,  | + |
| chr4 | 15492819 | 15493011 | CSAR_peak_ | 19.36,7.92,9. | + |
| chr4 | 15493078 | 15493117 | CSAR_peak_ | 9.58,7.26     | + |
| chr4 | 15493902 | 15493957 | CSAR_peak_ | 6.21          | + |
| chr4 | 15494207 | 15494253 | CSAR_peak_ | 6.21          | + |
| chr4 | 15494368 | 15494436 | CSAR_peak_ | 8.95          | + |
| chr4 | 15494549 | 15494595 | CSAR_peak_ | 6.87          | + |
| chr4 | 15495318 | 15495479 | CSAR_peak_ | 26.06,12.94,  | + |
| chr4 | 15495556 | 15495771 | CSAR_peak_ | 31.19,6.21,1  | + |
| chr4 | 15495812 | 15495900 | CSAR_peak_ | 16.33,6.21    | + |
| chr4 | 15496721 | 15496763 | CSAR_peak_ | 6.02          | + |
| chr4 | 15496884 | 15496960 | CSAR_peak_ | 9.77          | + |

|      |          |          |             |               |   |
|------|----------|----------|-------------|---------------|---|
| chr4 | 15497085 | 15497127 | CSAR_peak_! | 8.39          | + |
| chr4 | 15497195 | 15497292 | CSAR_peak_! | 8.39,8.13     | + |
| chr4 | 15498181 | 15498223 | CSAR_peak_! | 6.1           | + |
| chr4 | 15498224 | 15498260 | CSAR_peak_! | 7.27          | + |
| chr4 | 15498356 | 15498459 | CSAR_peak_! | 7.7,12.13,6.9 | + |
| chr4 | 15498593 | 15498640 | CSAR_peak_! | 6.21          | + |
| chr4 | 15498976 | 15499026 | CSAR_peak_! | 6.57          | + |
| chr4 | 15499230 | 15499249 | CSAR_peak_! | 6.02          | + |
| chr4 | 15499643 | 15499668 | CSAR_peak_! | 7.27          | + |
| chr4 | 15499678 | 15499724 | CSAR_peak_! | 18.73,7.34    | + |
| chr4 | 15499935 | 15499973 | CSAR_peak_! | 6.03          | + |
| chr4 | 15500475 | 15500543 | CSAR_peak_! | 7.58          | + |
| chr4 | 15501149 | 15501238 | CSAR_peak_! | 6.95          | + |
| chr4 | 15501450 | 15501540 | CSAR_peak_! | 13.89         | + |
| chr4 | 15501627 | 15501695 | CSAR_peak_! | 6.78,6.45     | + |
| chr4 | 15501881 | 15501949 | CSAR_peak_! | 6.02          | + |
| chr4 | 15502005 | 15502056 | CSAR_peak_! | 14.88         | + |
| chr4 | 15502198 | 15502327 | CSAR_peak_! | 7.27,11.07,1  | + |
| chr4 | 15502446 | 15502616 | CSAR_peak_! | 38.1,43.08,9  | + |
| chr4 | 15502684 | 15502720 | CSAR_peak_! | 7.7           | + |
| chr4 | 15502777 | 15502916 | CSAR_peak_! | 6.57,7.47,11  | + |
| chr4 | 15502942 | 15503011 | CSAR_peak_! | 6.21          | + |
| chr4 | 15503113 | 15503181 | CSAR_peak_! | 14.88         | + |
| chr4 | 15503410 | 15503486 | CSAR_peak_! | 13,8.13       | + |
| chr4 | 15545215 | 15545252 | CSAR_peak_! | 6.21          | + |
| chr4 | 15545317 | 15545388 | CSAR_peak_! | 5.62          | + |
| chr4 | 15545577 | 15545611 | CSAR_peak_! | 6.21          | + |
| chr4 | 15545754 | 15546007 | CSAR_peak_! | 16.33,8.95,8  | + |
| chr4 | 15546096 | 15546322 | CSAR_peak_! | 18.73,17.51,  | + |
| chr4 | 15546388 | 15546630 | CSAR_peak_! | 16.33,15,9.6  | + |
| chr4 | 15546780 | 15546847 | CSAR_peak_! | 6.44,12.13    | + |
| chr4 | 15546857 | 15546934 | CSAR_peak_! | 6.03,7.27     | + |
| chr4 | 15546940 | 15547021 | CSAR_peak_! | 6.21,6.57     | + |
| chr4 | 15547104 | 15547165 | CSAR_peak_! | 9.97,9.61     | + |
| chr4 | 15547204 | 15547404 | CSAR_peak_! | 12.13,8.28,1  | + |
| chr4 | 15547604 | 15547654 | CSAR_peak_! | 7.27          | + |
| chr4 | 15603897 | 15603964 | CSAR_peak_! | 13.48         | + |
| chr4 | 15609960 | 15610002 | CSAR_peak_! | 7.29,7.27     | + |
| chr4 | 15610086 | 15610136 | CSAR_peak_! | 9.58          | + |
| chr4 | 15610297 | 15610332 | CSAR_peak_! | 10.02         | + |
| chr4 | 15618871 | 15618920 | CSAR_peak_! | 9.77,8.28     | + |
| chr4 | 15619708 | 15619768 | CSAR_peak_! | 6.21          | + |

|      |          |          |             |               |   |
|------|----------|----------|-------------|---------------|---|
| chr4 | 15623446 | 15623505 | CSAR_peak_! | 6.21          | + |
| chr4 | 15657272 | 15657369 | CSAR_peak_! | 9.58          | + |
| chr4 | 15657639 | 15657694 | CSAR_peak_! | 6.95          | + |
| chr4 | 15658088 | 15658171 | CSAR_peak_! | 12.17         | + |
| chr4 | 15658313 | 15658337 | CSAR_peak_! | 10.83         | + |
| chr4 | 15659875 | 15659928 | CSAR_peak_! | 7.27          | + |
| chr4 | 15660480 | 15660537 | CSAR_peak_! | 6.21          | + |
| chr4 | 15661240 | 15661304 | CSAR_peak_! | 10.83         | + |
| chr4 | 15661568 | 15661639 | CSAR_peak_! | 7.27          | + |
| chr4 | 15661739 | 15661818 | CSAR_peak_! | 8.39          | + |
| chr4 | 15662188 | 15662253 | CSAR_peak_! | 6.21          | + |
| chr4 | 15662320 | 15662374 | CSAR_peak_! | 7.27          | + |
| chr4 | 15676589 | 15676699 | CSAR_peak_! | 22.74         | + |
| chr4 | 15676776 | 15676837 | CSAR_peak_! | 7.61,8.39     | + |
| chr4 | 15677003 | 15677031 | CSAR_peak_! | 10.83         | + |
| chr4 | 15677339 | 15677352 | CSAR_peak_! | 6.21          | + |
| chr4 | 15677386 | 15677504 | CSAR_peak_! | 9.61,13.32    | + |
| chr4 | 15677525 | 15677650 | CSAR_peak_! | 8.39,6.22,20. | + |
| chr4 | 15708864 | 15708963 | CSAR_peak_! | 7.36,16.25    | + |
| chr4 | 15709258 | 15709309 | CSAR_peak_! | 9.77          | + |
| chr4 | 15710237 | 15710316 | CSAR_peak_! | 14.88,16.33   | + |
| chr4 | 15710809 | 15710835 | CSAR_peak_! | 6.21          | + |
| chr4 | 15711261 | 15711288 | CSAR_peak_! | 7.58          | + |
| chr4 | 15711433 | 15711463 | CSAR_peak_! | 8.39          | + |
| chr4 | 15711590 | 15711642 | CSAR_peak_! | 14.08         | + |
| chr4 | 15711802 | 15711859 | CSAR_peak_! | 9.27,7.27     | + |
| chr4 | 15712031 | 15712075 | CSAR_peak_! | 7.27          | + |
| chr4 | 15712241 | 15712307 | CSAR_peak_! | 6.21          | + |
| chr4 | 15712491 | 15712555 | CSAR_peak_! | 7.92,10.02    | + |
| chr4 | 15732082 | 15732223 | CSAR_peak_! | 6.21,5.62,6.2 | + |
| chr4 | 15732339 | 15732415 | CSAR_peak_! | 7.58          | + |
| chr4 | 15735813 | 15735907 | CSAR_peak_! | 6.21          | + |
| chr4 | 15744186 | 15744240 | CSAR_peak_! | 9.58          | + |
| chr4 | 15747282 | 15747322 | CSAR_peak_! | 8.39          | + |
| chr4 | 15756643 | 15756683 | CSAR_peak_! | 5.62          | + |
| chr4 | 15757254 | 15757266 | CSAR_peak_! | 12.13         | + |
| chr4 | 15757362 | 15757378 | CSAR_peak_! | 7.34          | + |
| chr4 | 15757757 | 15757799 | CSAR_peak_! | 7.27          | + |
| chr4 | 15758415 | 15758480 | CSAR_peak_! | 6.57,10.95,6. | + |
| chr4 | 15758591 | 15758671 | CSAR_peak_! | 7.34,10.02    | + |
| chr4 | 15758800 | 15758876 | CSAR_peak_! | 13.48,6.03,6. | + |
| chr4 | 15758970 | 15759003 | CSAR_peak_! | 7.27,6.21     | + |

|      |          |          |             |               |   |
|------|----------|----------|-------------|---------------|---|
| chr4 | 15799377 | 15799416 | CSAR_peak_: | 10.02         | + |
| chr4 | 15799435 | 15799477 | CSAR_peak_: | 9.58          | + |
| chr4 | 15799884 | 15799957 | CSAR_peak_: | 11.38,7.92    | + |
| chr4 | 15800305 | 15800377 | CSAR_peak_: | 10.94,15.68   | + |
| chr4 | 15800519 | 15800567 | CSAR_peak_: | 9.58          | + |
| chr4 | 15801401 | 15801458 | CSAR_peak_: | 10.31,7.26,6. | + |
| chr4 | 15801566 | 15801577 | CSAR_peak_: | 7.34,6.95     | + |
| chr4 | 15801605 | 15801652 | CSAR_peak_: | 8.95          | + |
| chr4 | 15802179 | 15802270 | CSAR_peak_: | 8.39,8.39     | + |
| chr4 | 15850195 | 15850269 | CSAR_peak_: | 14.88         | + |
| chr4 | 15850827 | 15850869 | CSAR_peak_: | 10.57         | + |
| chr4 | 15851055 | 15851118 | CSAR_peak_: | 17.82,12.13   | + |
| chr4 | 15851194 | 15851208 | CSAR_peak_: | 8.39          | + |
| chr4 | 15851711 | 15851812 | CSAR_peak_: | 10.83         | + |
| chr4 | 15852290 | 15852348 | CSAR_peak_: | 9.77          | + |
| chr4 | 15852494 | 15852514 | CSAR_peak_: | 7.27          | + |
| chr4 | 15852527 | 15852591 | CSAR_peak_: | 21.94,8.9,6.8 | + |
| chr4 | 15852763 | 15852820 | CSAR_peak_: | 6.87,7.27     | + |
| chr4 | 15852993 | 15853032 | CSAR_peak_: | 6.21          | + |
| chr4 | 15853093 | 15853163 | CSAR_peak_: | 9.61,6.45,5.7 | + |
| chr4 | 15853234 | 15853291 | CSAR_peak_: | 8.13          | + |
| chr4 | 15853387 | 15853435 | CSAR_peak_: | 12.17         | + |
| chr4 | 15853520 | 15853562 | CSAR_peak_: | 6.85,14.63,8. | + |
| chr4 | 15853624 | 15853761 | CSAR_peak_: | 7.27,16.33,7. | + |
| chr4 | 15854171 | 15854234 | CSAR_peak_: | 15.37,15.42   | + |
| chr4 | 15925030 | 15925096 | CSAR_peak_: | 6.45,11.38    | + |
| chr4 | 15925991 | 15926050 | CSAR_peak_: | 8.39,8.95     | + |
| chr4 | 15960235 | 15960292 | CSAR_peak_: | 7.68          | + |
| chr4 | 15960557 | 15960594 | CSAR_peak_: | 8.13          | + |
| chr4 | 15960615 | 15960715 | CSAR_peak_: | 9.58          | + |
| chr4 | 15961592 | 15961665 | CSAR_peak_: | 7.27          | + |
| chr4 | 15961947 | 15962027 | CSAR_peak_: | 6.21,10.83,8. | + |
| chr4 | 15963018 | 15963086 | CSAR_peak_: | 8.13          | + |
| chr4 | 15963913 | 15963969 | CSAR_peak_: | 8.39,6.03     | + |
| chr4 | 16000710 | 16000750 | CSAR_peak_: | 6.95          | + |
| chr4 | 16001776 | 16001844 | CSAR_peak_: | 7.27          | + |
| chr4 | 16022754 | 16022789 | CSAR_peak_: | 8.95          | + |
| chr4 | 16023005 | 16023096 | CSAR_peak_: | 8.39          | + |
| chr4 | 16024766 | 16024819 | CSAR_peak_: | 7.34          | + |
| chr4 | 16025869 | 16025941 | CSAR_peak_: | 6.21,6.21     | + |
| chr4 | 16072603 | 16072620 | CSAR_peak_: | 8.65          | + |
| chr4 | 16073633 | 16073698 | CSAR_peak_: | 13.48,6.44    | + |

|      |          |          |             |               |   |
|------|----------|----------|-------------|---------------|---|
| chr4 | 16073704 | 16073749 | CSAR_peak_! | 7.92          | + |
| chr4 | 16085188 | 16085304 | CSAR_peak_! | 12.13,7.92    | + |
| chr4 | 16117404 | 16117460 | CSAR_peak_! | 12.31         | + |
| chr4 | 16117572 | 16117644 | CSAR_peak_! | 9.58          | + |
| chr4 | 16117932 | 16118002 | CSAR_peak_! | 10.83         | + |
| chr4 | 16118530 | 16118569 | CSAR_peak_! | 6.21          | + |
| chr4 | 16123821 | 16123868 | CSAR_peak_! | 8.39          | + |
| chr4 | 16124013 | 16124051 | CSAR_peak_! | 10.83         | + |
| chr4 | 16132514 | 16132536 | CSAR_peak_! | 7.27          | + |
| chr4 | 16132547 | 16132588 | CSAR_peak_! | 6.95          | + |
| chr4 | 16133425 | 16133480 | CSAR_peak_! | 6.21          | + |
| chr4 | 16140028 | 16140098 | CSAR_peak_! | 13.48         | + |
| chr4 | 16149352 | 16149411 | CSAR_peak_! | 9.58          | + |
| chr4 | 16156472 | 16156527 | CSAR_peak_! | 12.13,6.21    | + |
| chr4 | 16157314 | 16157427 | CSAR_peak_! | 8.39          | + |
| chr4 | 16157859 | 16157918 | CSAR_peak_! | 9.58          | + |
| chr4 | 16158290 | 16158339 | CSAR_peak_! | 10.33,10.95   | + |
| chr4 | 16158856 | 16158897 | CSAR_peak_! | 7.58          | + |
| chr4 | 16159340 | 16159393 | CSAR_peak_! | 6.21          | + |
| chr4 | 16165754 | 16165803 | CSAR_peak_! | 5.67          | + |
| chr4 | 16187623 | 16187690 | CSAR_peak_! | 18.73         | + |
| chr4 | 16187791 | 16187856 | CSAR_peak_! | 7.92          | + |
| chr4 | 16187868 | 16187896 | CSAR_peak_! | 7.92          | + |
| chr4 | 16260841 | 16260864 | CSAR_peak_! | 7.73          | + |
| chr4 | 16260935 | 16261000 | CSAR_peak_! | 9.97          | + |
| chr4 | 16261037 | 16261140 | CSAR_peak_! | 6.52,11.72,6. | + |
| chr4 | 16261312 | 16261413 | CSAR_peak_! | 19.36,17.51,. | + |
| chr4 | 16261416 | 16261450 | CSAR_peak_! | 7.36          | + |
| chr4 | 16261522 | 16261621 | CSAR_peak_! | 10.83,12.83   | + |
| chr4 | 16261634 | 16261688 | CSAR_peak_! | 13.29,8.61    | + |
| chr4 | 16261707 | 16261786 | CSAR_peak_! | 17.42,7,11.8  | + |
| chr4 | 16261956 | 16262191 | CSAR_peak_! | 20.13,21,19.  | + |
| chr4 | 16262278 | 16262382 | CSAR_peak_! | 27.49,8.82,3. | + |
| chr4 | 16262387 | 16262470 | CSAR_peak_! | 9.77,19.01,2. | + |
| chr4 | 16262480 | 16262598 | CSAR_peak_! | 8.53,18.65,1. | + |
| chr4 | 16262631 | 16262768 | CSAR_peak_! | 15.68,22.5    | + |
| chr4 | 16262908 | 16262957 | CSAR_peak_! | 19.36         | + |
| chr4 | 16263297 | 16263347 | CSAR_peak_! | 6.03          | + |
| chr4 | 16263955 | 16263993 | CSAR_peak_! | 6.21          | + |
| chr4 | 16265075 | 16265135 | CSAR_peak_! | 10.83         | + |
| chr4 | 16265226 | 16265271 | CSAR_peak_! | 8.39          | + |
| chr4 | 16265339 | 16265396 | CSAR_peak_! | 9.58          | + |

|      |          |          |             |               |   |
|------|----------|----------|-------------|---------------|---|
| chr4 | 16267244 | 16267296 | CSAR_peak_  | 5.62          | + |
| chr4 | 16267553 | 16267720 | CSAR_peak_! | 6.21,14.88,8. | + |
| chr4 | 16268370 | 16268456 | CSAR_peak_! | 14.88         | + |
| chr4 | 16268630 | 16268675 | CSAR_peak_! | 7.27,6.21     | + |
| chr4 | 16269057 | 16269099 | CSAR_peak_! | 8.39          | + |
| chr4 | 16269129 | 16269187 | CSAR_peak_! | 6.57,6.95     | + |
| chr4 | 16269792 | 16269825 | CSAR_peak_! | 6.57          | + |
| chr4 | 16270225 | 16270259 | CSAR_peak_! | 10.83         | + |
| chr4 | 16270261 | 16270297 | CSAR_peak_! | 10.33,6.57    | + |
| chr4 | 16270391 | 16270409 | CSAR_peak_! | 6.21          | + |
| chr4 | 16274436 | 16274470 | CSAR_peak_! | 8.39          | + |
| chr4 | 16278674 | 16278738 | CSAR_peak_! | 14.88         | + |
| chr4 | 16279922 | 16280022 | CSAR_peak_! | 13.44,6.95    | + |
| chr4 | 16295757 | 16295798 | CSAR_peak_! | 6.21          | + |
| chr4 | 16296394 | 16296548 | CSAR_peak_! | 8.39,14.76,1! | + |
| chr4 | 16296574 | 16296620 | CSAR_peak_! | 10.83,10.83   | + |
| chr4 | 16297287 | 16297342 | CSAR_peak_! | 8.13,6.21,6.4 | + |
| chr4 | 16297430 | 16297497 | CSAR_peak_! | 9.77          | + |
| chr4 | 16298001 | 16298123 | CSAR_peak_! | 11.14         | + |
| chr4 | 16301429 | 16301534 | CSAR_peak_! | 8.95,6.57     | + |
| chr4 | 16301586 | 16301621 | CSAR_peak_! | 6.03,8.39     | + |
| chr4 | 16301737 | 16301742 | CSAR_peak_! | 6.21          | + |
| chr4 | 16301828 | 16301942 | CSAR_peak_! | 8.13,7.73     | + |
| chr4 | 16302156 | 16302241 | CSAR_peak_! | 8.13,8.65     | + |
| chr4 | 16302446 | 16302511 | CSAR_peak_! | 9.77          | + |
| chr4 | 16302628 | 16302689 | CSAR_peak_! | 14.34         | + |
| chr4 | 16302817 | 16302894 | CSAR_peak_! | 14.61,7.07,1! | + |
| chr4 | 16302905 | 16302963 | CSAR_peak_! | 5.62,18.65    | + |
| chr4 | 16303007 | 16303084 | CSAR_peak_! | 12.17,10.83   | + |
| chr4 | 16303185 | 16303261 | CSAR_peak_! | 6.11,6.57     | + |
| chr4 | 16303607 | 16303672 | CSAR_peak_! | 6.51,23.49,9. | + |
| chr4 | 16303746 | 16303789 | CSAR_peak_! | 7.9,16.08     | + |
| chr4 | 16303850 | 16303892 | CSAR_peak_! | 11.38         | + |
| chr4 | 16311081 | 16311158 | CSAR_peak_! | 10.95         | + |
| chr4 | 16311178 | 16311237 | CSAR_peak_! | 9.58          | + |
| chr4 | 16311366 | 16311456 | CSAR_peak_! | 10.83         | + |
| chr4 | 16322595 | 16322651 | CSAR_peak_! | 8.09,13.6     | + |
| chr4 | 16331688 | 16331822 | CSAR_peak_! | 7.27,16.05,6. | + |
| chr4 | 16333426 | 16333484 | CSAR_peak_! | 19.36,5.62,8. | + |
| chr4 | 16334002 | 16334051 | CSAR_peak_! | 9.77,6.21     | + |
| chr4 | 16334144 | 16334202 | CSAR_peak_! | 7.27          | + |
| chr4 | 16334330 | 16334401 | CSAR_peak_! | 5.62,6.21,6.2 | + |

|      |          |          |             |                  |   |
|------|----------|----------|-------------|------------------|---|
| chr4 | 16341362 | 16341407 | CSAR_peak_! | 8.39             | + |
| chr4 | 16341467 | 16341610 | CSAR_peak_! | 7.73,13.18,10.1  | + |
| chr4 | 16341724 | 16341775 | CSAR_peak_! | 9.02,6.2         | + |
| chr4 | 16341860 | 16341895 | CSAR_peak_! | 6.21             | + |
| chr4 | 16341926 | 16341982 | CSAR_peak_! | 11.66            | + |
| chr4 | 16342247 | 16342298 | CSAR_peak_! | 9.27,6.85        | + |
| chr4 | 16342414 | 16342472 | CSAR_peak_! | 9.61             | + |
| chr4 | 16342573 | 16342727 | CSAR_peak_! | 7.58,11.72,10.1  | + |
| chr4 | 16342805 | 16342832 | CSAR_peak_! | 7.36             | + |
| chr4 | 16342867 | 16342908 | CSAR_peak_! | 6.12             | + |
| chr4 | 16351478 | 16351511 | CSAR_peak_! | 6.21             | + |
| chr4 | 16352047 | 16352086 | CSAR_peak_! | 8.39             | + |
| chr4 | 16353126 | 16353163 | CSAR_peak_! | 5.62             | + |
| chr4 | 16353755 | 16353833 | CSAR_peak_! | 5.79,6.57,6.5    | + |
| chr4 | 16355029 | 16355081 | CSAR_peak_! | 6.57,20.13       | + |
| chr4 | 16355250 | 16355292 | CSAR_peak_! | 6.47             | + |
| chr4 | 16355391 | 16355430 | CSAR_peak_! | 6.89             | + |
| chr4 | 16355470 | 16355526 | CSAR_peak_! | 12.74,18.73      | + |
| chr4 | 16355596 | 16355710 | CSAR_peak_! | 24.52,6.29,10.1  | + |
| chr4 | 16355892 | 16355957 | CSAR_peak_! | 11.14            | + |
| chr4 | 16355998 | 16356078 | CSAR_peak_! | 8.39,8.95        | + |
| chr4 | 16356312 | 16356468 | CSAR_peak_! | 12.17,13,15.1    | + |
| chr4 | 16356509 | 16356602 | CSAR_peak_! | 13,6.95,6.12     | + |
| chr4 | 16356944 | 16356987 | CSAR_peak_! | 7.58             | + |
| chr4 | 16391250 | 16391316 | CSAR_peak_! | 8.39             | + |
| chr4 | 16398352 | 16398401 | CSAR_peak_! | 8.39             | + |
| chr4 | 16398652 | 16398736 | CSAR_peak_! | 9.27,13.51       | + |
| chr4 | 16398745 | 16398795 | CSAR_peak_! | 6.57             | + |
| chr4 | 16399703 | 16399779 | CSAR_peak_! | 7.27,7.58        | + |
| chr4 | 16400349 | 16400412 | CSAR_peak_! | 9.58             | + |
| chr4 | 16400713 | 16400770 | CSAR_peak_! | 7.27             | + |
| chr4 | 16400826 | 16400886 | CSAR_peak_! | 8.39             | + |
| chr4 | 16400967 | 16401159 | CSAR_peak_! | 8.39,16.11       | + |
| chr4 | 16443646 | 16443689 | CSAR_peak_! | 9.58             | + |
| chr4 | 16443698 | 16443751 | CSAR_peak_! | 10.83            | + |
| chr4 | 16444272 | 16444326 | CSAR_peak_! | 6.21             | + |
| chr4 | 16444391 | 16444451 | CSAR_peak_! | 6.85,6.57        | + |
| chr4 | 16444631 | 16444689 | CSAR_peak_! | 7.27             | + |
| chr4 | 16451898 | 16452619 | CSAR_peak_! | 23.84,28.38,10.1 | + |
| chr4 | 16452629 | 16452914 | CSAR_peak_! | 16.25,15.82,10.1 | + |
| chr4 | 16452965 | 16453048 | CSAR_peak_! | 16.33            | + |
| chr4 | 16453100 | 16453256 | CSAR_peak_! | 16.33,12.13,10.1 | + |



|      |          |          |             |               |   |
|------|----------|----------|-------------|---------------|---|
| chr4 | 16453442 | 16453510 | CSAR_peak_! | 9.27,8.39     | + |
| chr4 | 16461400 | 16461453 | CSAR_peak_! | 6.03          | + |
| chr4 | 16462132 | 16462188 | CSAR_peak_! | 14.88         | + |
| chr4 | 16471972 | 16472002 | CSAR_peak_! | 8.39          | + |
| chr4 | 16473712 | 16473756 | CSAR_peak_! | 6.21          | + |
| chr4 | 16474231 | 16474290 | CSAR_peak_! | 6.21          | + |
| chr4 | 16474522 | 16474568 | CSAR_peak_! | 9.58          | + |
| chr4 | 16474757 | 16474807 | CSAR_peak_! | 6.21          | + |
| chr4 | 16475842 | 16475888 | CSAR_peak_! | 12.13         | + |
| chr4 | 16476228 | 16476296 | CSAR_peak_! | 12.5,7.58     | + |
| chr4 | 16476340 | 16476386 | CSAR_peak_! | 6.64          | + |
| chr4 | 16498732 | 16498769 | CSAR_peak_! | 7.78,6.57     | + |
| chr4 | 16498955 | 16499014 | CSAR_peak_! | 8.39          | + |
| chr4 | 16499036 | 16499133 | CSAR_peak_! | 8.61,6.44,10. | + |
| chr4 | 16499448 | 16499512 | CSAR_peak_! | 8.39,6.78     | + |
| chr4 | 16499983 | 16500032 | CSAR_peak_! | 9.58          | + |
| chr4 | 16500056 | 16500099 | CSAR_peak_! | 6.21          | + |
| chr4 | 16500363 | 16500449 | CSAR_peak_! | 7.78,11.83    | + |
| chr4 | 16500823 | 16500869 | CSAR_peak_! | 9.77          | + |
| chr4 | 16501052 | 16501115 | CSAR_peak_! | 6.21,6.03     | + |
| chr4 | 16501222 | 16501292 | CSAR_peak_! | 8.65          | + |
| chr4 | 16501507 | 16501652 | CSAR_peak_! | 7.92,14.88    | + |
| chr4 | 16539284 | 16539324 | CSAR_peak_! | 13.48         | + |
| chr4 | 16539415 | 16539448 | CSAR_peak_! | 6.21          | + |
| chr4 | 16540264 | 16540307 | CSAR_peak_! | 6.21          | + |
| chr4 | 16540317 | 16540359 | CSAR_peak_! | 6.21          | + |
| chr4 | 16548860 | 16548880 | CSAR_peak_! | 7.73          | + |
| chr4 | 16550280 | 16550328 | CSAR_peak_! | 6.21          | + |
| chr4 | 16708648 | 16708706 | CSAR_peak_! | 6.37          | + |
| chr4 | 16708884 | 16708942 | CSAR_peak_! | 7.36          | + |
| chr4 | 16709217 | 16709286 | CSAR_peak_! | 11.14         | + |
| chr4 | 16709699 | 16709746 | CSAR_peak_! | 10.33,7.92    | + |
| chr4 | 16754848 | 16754919 | CSAR_peak_! | 6.21          | + |
| chr4 | 16803593 | 16803662 | CSAR_peak_! | 8.39          | + |
| chr4 | 16804039 | 16804105 | CSAR_peak_! | 7.27          | + |
| chr4 | 16822160 | 16822196 | CSAR_peak_! | 10.83,6.03    | + |
| chr4 | 16822390 | 16822415 | CSAR_peak_! | 9.58          | + |
| chr4 | 16822635 | 16822675 | CSAR_peak_! | 6.21          | + |
| chr4 | 16839976 | 16840012 | CSAR_peak_! | 6.85,6.21     | + |
| chr4 | 16840305 | 16840415 | CSAR_peak_! | 12.13,6.1,9.5 | + |
| chr4 | 16840556 | 16840606 | CSAR_peak_! | 6.03,9.58     | + |
| chr4 | 16840612 | 16840666 | CSAR_peak_! | 11.63,8.65,1. | + |

|      |          |          |             |                |   |
|------|----------|----------|-------------|----------------|---|
| chr4 | 16840885 | 16840931 | CSAR_peak_! | 8.39           | + |
| chr4 | 16841089 | 16841115 | CSAR_peak_! | 6.51           | + |
| chr4 | 16841350 | 16841361 | CSAR_peak_! | 7.27           | + |
| chr4 | 16841422 | 16841436 | CSAR_peak_! | 7.27           | + |
| chr4 | 16841639 | 16841677 | CSAR_peak_! | 8.39           | + |
| chr4 | 16858636 | 16858715 | CSAR_peak_! | 8.39           | + |
| chr4 | 16859275 | 16859390 | CSAR_peak_! | 7.27           | + |
| chr4 | 16945058 | 16945259 | CSAR_peak_! | 9.27,18.72,1!  | + |
| chr4 | 16945366 | 16945704 | CSAR_peak_! | 7.36,13.48,1(+ |   |
| chr4 | 16945747 | 16945798 | CSAR_peak_! | 12.13          | + |
| chr4 | 16945846 | 16945928 | CSAR_peak_! | 14.79,23.82    | + |
| chr4 | 16945933 | 16945984 | CSAR_peak_! | 14.58          | + |
| chr4 | 16945993 | 16946063 | CSAR_peak_! | 7.27,8.65      | + |
| chr4 | 16946082 | 16946188 | CSAR_peak_! | 21.37,8.52     | + |
| chr4 | 16946350 | 16946416 | CSAR_peak_! | 20.13,8.39     | + |
| chr4 | 16946617 | 16946687 | CSAR_peak_! | 15             | + |
| chr4 | 17022140 | 17022198 | CSAR_peak_! | 18.95          | + |
| chr4 | 17022616 | 17022668 | CSAR_peak_! | 6.21           | + |
| chr4 | 17035585 | 17035629 | CSAR_peak_! | 6.21           | + |
| chr4 | 17035920 | 17035940 | CSAR_peak_! | 6.21           | + |
| chr4 | 17036548 | 17036592 | CSAR_peak_! | 7.27           | + |
| chr4 | 17124383 | 17124483 | CSAR_peak_! | 10.83          | + |
| chr4 | 17124957 | 17125028 | CSAR_peak_! | 11.38,22.56    | + |
| chr4 | 17125129 | 17125140 | CSAR_peak_! | 8.1            | + |
| chr4 | 17125158 | 17125244 | CSAR_peak_! | 7.27,10.83     | + |
| chr4 | 17125792 | 17125844 | CSAR_peak_! | 6.44           | + |
| chr4 | 17128103 | 17128143 | CSAR_peak_! | 7.27           | + |
| chr4 | 17128244 | 17128292 | CSAR_peak_! | 8.28,6.21      | + |
| chr4 | 17128621 | 17128665 | CSAR_peak_! | 11.38          | + |
| chr4 | 17129133 | 17129193 | CSAR_peak_! | 6.95           | + |
| chr4 | 17131306 | 17131364 | CSAR_peak_! | 7.27           | + |
| chr4 | 17132300 | 17132346 | CSAR_peak_! | 8.39           | + |
| chr4 | 17132586 | 17132626 | CSAR_peak_! | 7.92,5.62      | + |
| chr4 | 17132783 | 17132814 | CSAR_peak_! | 6.57           | + |
| chr4 | 17133777 | 17133798 | CSAR_peak_! | 7.27           | + |
| chr4 | 17197863 | 17197910 | CSAR_peak_! | 6.57           | + |
| chr4 | 17201948 | 17202007 | CSAR_peak_! | 15.2,16.77     | + |
| chr4 | 17202090 | 17202141 | CSAR_peak_! | 16.08          | + |
| chr4 | 17202153 | 17202329 | CSAR_peak_! | 6.21,7.26,9.7+ |   |
| chr4 | 17202337 | 17202376 | CSAR_peak_! | 6.57           | + |
| chr4 | 17202516 | 17202537 | CSAR_peak_! | 9.58           | + |
| chr4 | 17202606 | 17202666 | CSAR_peak_! | 5.95           | + |

|      |          |          |             |               |   |
|------|----------|----------|-------------|---------------|---|
| chr4 | 17203071 | 17203129 | CSAR_peak_! | 9.58          | + |
| chr4 | 17219067 | 17219078 | CSAR_peak_! | 6.21          | + |
| chr4 | 17220731 | 17220789 | CSAR_peak_! | 10.83,6.21    | + |
| chr4 | 17221179 | 17221229 | CSAR_peak_! | 8.65          | + |
| chr4 | 17307070 | 17307130 | CSAR_peak_! | 11.45         | + |
| chr4 | 17307271 | 17307318 | CSAR_peak_! | 7.27          | + |
| chr4 | 17307403 | 17307491 | CSAR_peak_! | 6.1,8.65      | + |
| chr4 | 17307795 | 17307854 | CSAR_peak_! | 8.39          | + |
| chr4 | 17308196 | 17308275 | CSAR_peak_! | 6.21,11.66    | + |
| chr4 | 17308602 | 17308633 | CSAR_peak_! | 7.27          | + |
| chr4 | 17308638 | 17308687 | CSAR_peak_! | 8.65,8.39     | + |
| chr4 | 17308839 | 17308891 | CSAR_peak_! | 13.44,8.39    | + |
| chr4 | 17309052 | 17309083 | CSAR_peak_! | 10.83         | + |
| chr4 | 17309406 | 17309471 | CSAR_peak_! | 6.57,8.39,13. | + |
| chr4 | 17309571 | 17309614 | CSAR_peak_! | 8.39          | + |
| chr4 | 17326907 | 17326984 | CSAR_peak_! | 7.27,6.03     | + |
| chr4 | 17327178 | 17327221 | CSAR_peak_! | 12.31         | + |
| chr4 | 17327522 | 17327597 | CSAR_peak_! | 6.57,8.39     | + |
| chr4 | 17327675 | 17327738 | CSAR_peak_! | 9.58,8.39     | + |
| chr4 | 17328181 | 17328242 | CSAR_peak_! | 17.35,22.58   | + |
| chr4 | 17328728 | 17328778 | CSAR_peak_! | 8.39,6.95     | + |
| chr4 | 17329266 | 17329311 | CSAR_peak_! | 8.65          | + |
| chr4 | 17329600 | 17329632 | CSAR_peak_! | 8.39          | + |
| chr4 | 17329812 | 17329836 | CSAR_peak_! | 7.27          | + |
| chr4 | 17329866 | 17329884 | CSAR_peak_! | 7.27          | + |
| chr4 | 17329913 | 17329962 | CSAR_peak_! | 7.27          | + |
| chr4 | 17337111 | 17337184 | CSAR_peak_! | 6.21          | + |
| chr4 | 17401389 | 17401444 | CSAR_peak_! | 7.27          | + |
| chr4 | 17401532 | 17401560 | CSAR_peak_! | 5.62          | + |
| chr4 | 17401646 | 17401669 | CSAR_peak_! | 6.21          | + |
| chr4 | 17402058 | 17402100 | CSAR_peak_! | 6.57          | + |
| chr4 | 17402210 | 17402244 | CSAR_peak_! | 6.57          | + |
| chr4 | 17402353 | 17402429 | CSAR_peak_! | 12.74,6.95    | + |
| chr4 | 17402535 | 17402544 | CSAR_peak_! | 7.27          | + |
| chr4 | 17427493 | 17427541 | CSAR_peak_! | 12.13         | + |
| chr4 | 17427643 | 17427682 | CSAR_peak_! | 6.57          | + |
| chr4 | 17441086 | 17441141 | CSAR_peak_! | 6.44          | + |
| chr4 | 17444878 | 17444920 | CSAR_peak_! | 7.27          | + |
| chr4 | 17445199 | 17445239 | CSAR_peak_! | 8.65,6.85     | + |
| chr4 | 17446002 | 17446034 | CSAR_peak_! | 6.21          | + |
| chr4 | 17474780 | 17474830 | CSAR_peak_! | 7.27          | + |
| chr4 | 17487620 | 17487727 | CSAR_peak_! | 11.14,5.62    | + |

|      |          |          |             |                   |   |
|------|----------|----------|-------------|-------------------|---|
| chr4 | 17488773 | 17488873 | CSAR_peak_! | 7.34              | + |
| chr4 | 17504772 | 17504870 | CSAR_peak_! | 6.21,11.14        | + |
| chr4 | 17505070 | 17505127 | CSAR_peak_! | 8.39              | + |
| chr4 | 17505596 | 17505656 | CSAR_peak_! | 6.21              | + |
| chr4 | 17505680 | 17505715 | CSAR_peak_! | 6.57              | + |
| chr4 | 17505883 | 17506113 | CSAR_peak_! | 9.32,14.59,16.33  | + |
| chr4 | 17506173 | 17506250 | CSAR_peak_! | 6.03,7.58         | + |
| chr4 | 17515167 | 17515241 | CSAR_peak_! | 16.33             | + |
| chr4 | 17540540 | 17540683 | CSAR_peak_! | 7.34,27.77        | + |
| chr4 | 17540882 | 17540963 | CSAR_peak_! | 16.33             | + |
| chr4 | 17540991 | 17541058 | CSAR_peak_! | 9.31              | + |
| chr4 | 17541073 | 17541184 | CSAR_peak_! | 7.34,27.64        | + |
| chr4 | 17541313 | 17541555 | CSAR_peak_! | 21.22,10.31,16.33 | + |
| chr4 | 17542418 | 17542451 | CSAR_peak_! | 6.21              | + |
| chr4 | 17542961 | 17542995 | CSAR_peak_! | 6.21              | + |
| chr4 | 17546236 | 17546273 | CSAR_peak_! | 7.27              | + |
| chr4 | 17554823 | 17554904 | CSAR_peak_! | 9.77              | + |
| chr4 | 17591320 | 17591386 | CSAR_peak_! | 9.27              | + |
| chr4 | 17591453 | 17591475 | CSAR_peak_! | 6.57              | + |
| chr4 | 17591520 | 17591542 | CSAR_peak_! | 6.94              | + |
| chr4 | 17591613 | 17591673 | CSAR_peak_! | 6.21              | + |
| chr4 | 17591920 | 17591974 | CSAR_peak_! | 10.02             | + |
| chr4 | 17592019 | 17592063 | CSAR_peak_! | 7.27              | + |
| chr4 | 17592135 | 17592190 | CSAR_peak_! | 9.58,10.83        | + |
| chr4 | 17592203 | 17592268 | CSAR_peak_! | 17.69,11.35       | + |
| chr4 | 17592287 | 17592315 | CSAR_peak_! | 6.57              | + |
| chr4 | 17592317 | 17592432 | CSAR_peak_! | 6.21,7.27,7.6     | + |
| chr4 | 17592576 | 17592698 | CSAR_peak_! | 17.87,26.69       | + |
| chr4 | 17632038 | 17632095 | CSAR_peak_! | 6.44              | + |
| chr4 | 17632136 | 17632227 | CSAR_peak_! | 9.58,12.31,8.39   | + |
| chr4 | 17632258 | 17632290 | CSAR_peak_! | 7.27              | + |
| chr4 | 17768495 | 17768601 | CSAR_peak_! | 9.77,18.73        | + |
| chr4 | 17768966 | 17769062 | CSAR_peak_! | 10.83,6.21        | + |
| chr4 | 17769091 | 17769135 | CSAR_peak_! | 6.21,8.39         | + |
| chr4 | 17769142 | 17769191 | CSAR_peak_! | 6.94              | + |
| chr4 | 17810184 | 17810232 | CSAR_peak_! | 8.39              | + |
| chr4 | 17868649 | 17868700 | CSAR_peak_! | 7.27              | + |
| chr4 | 17936733 | 17936811 | CSAR_peak_! | 14.76             | + |
| chr4 | 17938620 | 17938669 | CSAR_peak_! | 10.02             | + |
| chr4 | 17939756 | 17939843 | CSAR_peak_! | 6.21              | + |
| chr4 | 17940970 | 17941053 | CSAR_peak_! | 14.08             | + |
| chr4 | 17941091 | 17941208 | CSAR_peak_! | 6.95,7.73         | + |

|      |          |          |             |                |   |
|------|----------|----------|-------------|----------------|---|
| chr4 | 17941623 | 17941684 | CSAR_peak_! | 6.21           | + |
| chr4 | 17942983 | 17943030 | CSAR_peak_! | 6.95           | + |
| chr4 | 17969850 | 17969896 | CSAR_peak_! | 6.21           | + |
| chr4 | 17999457 | 17999520 | CSAR_peak_! | 6.84,12.27     | + |
| chr4 | 17999600 | 17999641 | CSAR_peak_! | 8.71           | + |
| chr4 | 17999659 | 17999769 | CSAR_peak_! | 31.73,13.48,   | + |
| chr4 | 17999981 | 18000032 | CSAR_peak_! | 10.95,11.14    | + |
| chr4 | 18000070 | 18000121 | CSAR_peak_! | 8.52,9.4       | + |
| chr4 | 18000296 | 18000348 | CSAR_peak_! | 11.9,6.28      | + |
| chr4 | 18000357 | 18000463 | CSAR_peak_! | 6.21,18.95,9.  | + |
| chr4 | 18000754 | 18000791 | CSAR_peak_! | 8.95           | + |
| chr4 | 18000932 | 18001088 | CSAR_peak_! | 21.94,12.15,   | + |
| chr4 | 18001099 | 18001316 | CSAR_peak_! | 9.61,16.08,8.  | + |
| chr4 | 18001317 | 18001401 | CSAR_peak_! | 34.16,7.61,7.  | + |
| chr4 | 18001502 | 18001570 | CSAR_peak_! | 12.5,5.67,13.  | + |
| chr4 | 18001620 | 18001817 | CSAR_peak_! | 17.47,5.95,1(+ |   |
| chr4 | 18001829 | 18001955 | CSAR_peak_! | 12.09,7.18     | + |
| chr4 | 18002038 | 18002146 | CSAR_peak_! | 11.32,10.76    | + |
| chr4 | 18002339 | 18002429 | CSAR_peak_! | 6.53,15.25,6.  | + |
| chr4 | 18002627 | 18002737 | CSAR_peak_! | 16.08,12.72,   | + |
| chr4 | 18002747 | 18002839 | CSAR_peak_! | 10.64,7.35     | + |
| chr4 | 18002883 | 18002970 | CSAR_peak_! | 11.75,9.47     | + |
| chr4 | 18002974 | 18003514 | CSAR_peak_! | 50.27,17.82,   | + |
| chr4 | 18003534 | 18003617 | CSAR_peak_! | 6.03           | + |
| chr4 | 18004034 | 18004074 | CSAR_peak_! | 6.21           | + |
| chr4 | 18004101 | 18004203 | CSAR_peak_! | 6.21,6.21      | + |
| chr4 | 18004322 | 18004381 | CSAR_peak_! | 14.88,10.17    | + |
| chr4 | 18004426 | 18004494 | CSAR_peak_! | 8.92           | + |
| chr4 | 18004529 | 18004622 | CSAR_peak_! | 15.43,9.84,1(+ |   |
| chr4 | 18004685 | 18004804 | CSAR_peak_! | 14.88,6.37     | + |
| chr4 | 18004848 | 18005049 | CSAR_peak_! | 31.2,6.95,7.2+ |   |
| chr4 | 18005282 | 18005612 | CSAR_peak_! | 16.11,13.29,   | + |
| chr4 | 18005644 | 18005748 | CSAR_peak_! | 12.09,15.64    | + |
| chr4 | 18005753 | 18005999 | CSAR_peak_! | 13.32,54.39,   | + |
| chr4 | 18006056 | 18006112 | CSAR_peak_! | 7.27           | + |
| chr4 | 18006146 | 18006216 | CSAR_peak_! | 8.39           | + |
| chr4 | 18006237 | 18006309 | CSAR_peak_! | 14.88          | + |
| chr4 | 18006857 | 18006915 | CSAR_peak_! | 8.39           | + |
| chr4 | 18007024 | 18007083 | CSAR_peak_! | 7.58,6.57      | + |
| chr4 | 18007131 | 18007216 | CSAR_peak_! | 8.39           | + |
| chr4 | 18007240 | 18007264 | CSAR_peak_! | 13.48          | + |
| chr4 | 18007291 | 18007340 | CSAR_peak_! | 7.58           | + |

|      |          |          |             |               |   |
|------|----------|----------|-------------|---------------|---|
| chr4 | 18007443 | 18007492 | CSAR_peak_! | 16.11         | + |
| chr4 | 18007522 | 18007562 | CSAR_peak_! | 14.36         | + |
| chr4 | 18007719 | 18007786 | CSAR_peak_! | 6.78,9.35     | + |
| chr4 | 18008052 | 18008179 | CSAR_peak_! | 6.57,10.02,1! | + |
| chr4 | 18008670 | 18008737 | CSAR_peak_! | 8.39          | + |
| chr4 | 18009034 | 18009130 | CSAR_peak_! | 16.19,6.72,8. | + |
| chr4 | 18009302 | 18009375 | CSAR_peak_! | 12.94,11.07   | + |
| chr4 | 18009476 | 18009567 | CSAR_peak_! | 10.95,13.44   | + |
| chr4 | 18009888 | 18009930 | CSAR_peak_! | 7.58          | + |
| chr4 | 18010180 | 18010259 | CSAR_peak_! | 9.41,8.12,20. | + |
| chr4 | 18010366 | 18010422 | CSAR_peak_! | 9.27          | + |
| chr4 | 18010841 | 18010908 | CSAR_peak_! | 8.39          | + |
| chr4 | 18011788 | 18011812 | CSAR_peak_! | 8.39          | + |
| chr4 | 18024695 | 18024746 | CSAR_peak_! | 6.21          | + |
| chr4 | 18025710 | 18025757 | CSAR_peak_! | 12.17,6.03    | + |
| chr4 | 18025886 | 18025938 | CSAR_peak_! | 12.13,6.21    | + |
| chr4 | 18026071 | 18026127 | CSAR_peak_! | 13.51         | + |
| chr4 | 18026248 | 18026300 | CSAR_peak_! | 6.45,7.36     | + |
| chr4 | 18026450 | 18026476 | CSAR_peak_! | 6.02          | + |
| chr4 | 18026567 | 18026616 | CSAR_peak_! | 9.03,17.37,6. | + |
| chr4 | 18026697 | 18026718 | CSAR_peak_! | 12.13,6.03    | + |
| chr4 | 18026771 | 18026869 | CSAR_peak_! | 7.27,20.05,7. | + |
| chr4 | 18026889 | 18026934 | CSAR_peak_! | 12.13         | + |
| chr4 | 18026935 | 18027040 | CSAR_peak_! | 9.77,8.13     | + |
| chr4 | 18027073 | 18027092 | CSAR_peak_! | 6.21          | + |
| chr4 | 18027211 | 18027295 | CSAR_peak_! | 28.21         | + |
| chr4 | 18027449 | 18027536 | CSAR_peak_! | 5.62,8.13     | + |
| chr4 | 18027669 | 18027709 | CSAR_peak_! | 8.39,10.95    | + |
| chr4 | 18027894 | 18027922 | CSAR_peak_! | 7.27          | + |
| chr4 | 18027963 | 18028050 | CSAR_peak_! | 7.92          | + |
| chr4 | 18028080 | 18028130 | CSAR_peak_! | 7.27          | + |
| chr4 | 18028171 | 18028442 | CSAR_peak_! | 21.94,12.52   | + |
| chr4 | 18029940 | 18030023 | CSAR_peak_! | 6.21          | + |
| chr4 | 18034588 | 18034633 | CSAR_peak_! | 6.21          | + |
| chr4 | 18054071 | 18054109 | CSAR_peak_! | 6.21          | + |
| chr4 | 18054291 | 18054321 | CSAR_peak_! | 6.57          | + |
| chr4 | 18054757 | 18054805 | CSAR_peak_! | 6.03          | + |
| chr4 | 18149637 | 18149770 | CSAR_peak_! | 19.18,6.37    | + |
| chr4 | 18149803 | 18149910 | CSAR_peak_! | 9.72,13.66    | + |
| chr4 | 18149987 | 18150071 | CSAR_peak_! | 10.96,6.92,9. | + |
| chr4 | 18150106 | 18150153 | CSAR_peak_! | 13.44,6.21    | + |
| chr4 | 18150320 | 18150353 | CSAR_peak_! | 7.34          | + |

|      |          |          |             |               |   |
|------|----------|----------|-------------|---------------|---|
| chr4 | 18150444 | 18150491 | CSAR_peak_! | 6.21,7.27     | + |
| chr4 | 18150525 | 18150566 | CSAR_peak_! | 19.36,6.21    | + |
| chr4 | 18150623 | 18150664 | CSAR_peak_! | 8.94          | + |
| chr4 | 18150739 | 18150779 | CSAR_peak_! | 8.13,6.45,8.5 | + |
| chr4 | 18150822 | 18150978 | CSAR_peak_! | 14.88,12.35,  | + |
| chr4 | 18150998 | 18151223 | CSAR_peak_! | 10.33,6.21,1  | + |
| chr4 | 18151270 | 18151299 | CSAR_peak_! | 14.76         | + |
| chr4 | 18151342 | 18151567 | CSAR_peak_! | 7.91,6.14,23. | + |
| chr4 | 18152002 | 18152057 | CSAR_peak_! | 6.95          | + |
| chr4 | 18152102 | 18152150 | CSAR_peak_! | 13.51         | + |
| chr4 | 18152596 | 18152656 | CSAR_peak_! | 11.14         | + |
| chr4 | 18152900 | 18152964 | CSAR_peak_! | 9.58,6.57,7.2 | + |
| chr4 | 18153698 | 18153720 | CSAR_peak_! | 6.57          | + |
| chr4 | 18153734 | 18153771 | CSAR_peak_! | 6.21          | + |
| chr4 | 18187128 | 18187165 | CSAR_peak_! | 6.21          | + |
| chr4 | 18187512 | 18187561 | CSAR_peak_! | 7.27          | + |
| chr4 | 18187655 | 18187721 | CSAR_peak_! | 8.39          | + |
| chr4 | 18197092 | 18197103 | CSAR_peak_! | 7.27          | + |
| chr4 | 18197192 | 18197218 | CSAR_peak_! | 6.21          | + |
| chr4 | 18197778 | 18197826 | CSAR_peak_! | 6.21,7.27     | + |
| chr4 | 18199381 | 18199430 | CSAR_peak_! | 6.21          | + |
| chr4 | 18210261 | 18210309 | CSAR_peak_! | 16.54,6.37    | + |
| chr4 | 18211095 | 18211153 | CSAR_peak_! | 8.39,16.33    | + |
| chr4 | 18211413 | 18211490 | CSAR_peak_! | 8.95,8.39     | + |
| chr4 | 18211517 | 18211551 | CSAR_peak_! | 6.57          | + |
| chr4 | 18211965 | 18212056 | CSAR_peak_! | 12.74,6.22,6. | + |
| chr4 | 18212148 | 18212169 | CSAR_peak_! | 6.21          | + |
| chr4 | 18212529 | 18212607 | CSAR_peak_! | 10.83,8.39    | + |
| chr4 | 18212629 | 18212675 | CSAR_peak_! | 7.27          | + |
| chr4 | 18212749 | 18212803 | CSAR_peak_! | 6.57          | + |
| chr4 | 18214126 | 18214153 | CSAR_peak_! | 6.44          | + |
| chr4 | 18214189 | 18214216 | CSAR_peak_! | 6.21          | + |
| chr4 | 18214581 | 18214599 | CSAR_peak_! | 6.21          | + |
| chr4 | 18214914 | 18215024 | CSAR_peak_! | 10.83,19.36   | + |
| chr4 | 18265806 | 18265877 | CSAR_peak_! | 10.95         | + |
| chr4 | 18267370 | 18267449 | CSAR_peak_! | 6.03,6.95     | + |
| chr4 | 18289090 | 18289144 | CSAR_peak_! | 6.21          | + |
| chr4 | 18289439 | 18289522 | CSAR_peak_! | 17.37         | + |
| chr4 | 18289647 | 18289706 | CSAR_peak_! | 8.39          | + |
| chr4 | 18298852 | 18298901 | CSAR_peak_! | 7.27          | + |
| chr4 | 18299456 | 18299552 | CSAR_peak_! | 8.39,8.39     | + |
| chr4 | 18300086 | 18300140 | CSAR_peak_! | 7.27          | + |

|      |          |          |             |               |   |
|------|----------|----------|-------------|---------------|---|
| chr4 | 18300258 | 18300315 | CSAR_peak_! | 6.21          | + |
| chr4 | 18304889 | 18304916 | CSAR_peak_! | 14.4          | + |
| chr4 | 18304926 | 18305017 | CSAR_peak_! | 103.55,117.7  | + |
| chr4 | 18305101 | 18305159 | CSAR_peak_! | 51.06,60.29   | + |
| chr4 | 18305249 | 18305384 | CSAR_peak_! | 64.31,67.8,5  | + |
| chr4 | 18305415 | 18305543 | CSAR_peak_! | 12.19,75.05,  | + |
| chr4 | 18305581 | 18305615 | CSAR_peak_! | 18.75         | + |
| chr4 | 18305618 | 18305709 | CSAR_peak_! | 55.07,68.53   | + |
| chr4 | 18327338 | 18327395 | CSAR_peak_! | 8.39          | + |
| chr4 | 18327520 | 18327553 | CSAR_peak_! | 6.21          | + |
| chr4 | 18327593 | 18327627 | CSAR_peak_! | 6.57,6.21     | + |
| chr4 | 18327653 | 18327715 | CSAR_peak_! | 6.21          | + |
| chr4 | 18327861 | 18327903 | CSAR_peak_! | 9.58          | + |
| chr4 | 18328080 | 18328131 | CSAR_peak_! | 10.83         | + |
| chr4 | 18328289 | 18328353 | CSAR_peak_! | 7.27          | + |
| chr4 | 18328408 | 18328447 | CSAR_peak_! | 8.39          | + |
| chr4 | 18341976 | 18342024 | CSAR_peak_! | 6.57          | + |
| chr4 | 18342052 | 18342095 | CSAR_peak_! | 7.27          | + |
| chr4 | 18343079 | 18343127 | CSAR_peak_! | 7.58          | + |
| chr4 | 18344460 | 18344525 | CSAR_peak_! | 6.45,6.21     | + |
| chr4 | 18351684 | 18351721 | CSAR_peak_! | 6.21          | + |
| chr4 | 18351994 | 18352049 | CSAR_peak_! | 8.39          | + |
| chr4 | 18354528 | 18354638 | CSAR_peak_! | 6.57          | + |
| chr4 | 18379183 | 18379221 | CSAR_peak_! | 5.62          | + |
| chr4 | 18433209 | 18433263 | CSAR_peak_! | 7.27          | + |
| chr4 | 18490371 | 18490479 | CSAR_peak_! | 6.57,6.44     | + |
| chr4 | 18492567 | 18492612 | CSAR_peak_! | 9.58          | + |
| chr4 | 18492755 | 18492805 | CSAR_peak_! | 6.21          | + |
| chr4 | 18494499 | 18494550 | CSAR_peak_! | 10.31         | + |
| chr4 | 18494656 | 18494714 | CSAR_peak_! | 7.27,7.27     | + |
| chr4 | 18496357 | 18496410 | CSAR_peak_! | 6.21          | + |
| chr4 | 18519780 | 18519812 | CSAR_peak_! | 8.5           | + |
| chr4 | 18520146 | 18520170 | CSAR_peak_! | 9.77          | + |
| chr4 | 18520675 | 18520719 | CSAR_peak_! | 9.97,6.02     | + |
| chr4 | 18520789 | 18520839 | CSAR_peak_! | 6.21          | + |
| chr4 | 18520842 | 18520910 | CSAR_peak_! | 9.97,8.52     | + |
| chr4 | 18520949 | 18521023 | CSAR_peak_! | 8.39,6.95,8.9 | + |
| chr4 | 18521044 | 18521198 | CSAR_peak_! | 12.27,17.35,  | + |
| chr4 | 18521224 | 18521381 | CSAR_peak_! | 11.14,10.83,  | + |
| chr4 | 18525749 | 18525839 | CSAR_peak_! | 10.83,12.31   | + |
| chr4 | 18525931 | 18526052 | CSAR_peak_! | 11.28         | + |
| chr4 | 18526090 | 18526170 | CSAR_peak_! | 15.64         | + |



|      |          |          |             |                |   |
|------|----------|----------|-------------|----------------|---|
| chr4 | 18526690 | 18526788 | CSAR_peak_! | 21.94,9.77     | + |
| chr4 | 18527073 | 18527140 | CSAR_peak_! | 7.58           | + |
| chr4 | 18535326 | 18535383 | CSAR_peak_! | 13.44,11.14    | + |
| chr4 | 18535824 | 18535846 | CSAR_peak_! | 10.83          | + |
| chr4 | 18540211 | 18540272 | CSAR_peak_! | 13.51,10.02    | + |
| chr4 | 18540445 | 18540534 | CSAR_peak_! | 19.96,12.31    | + |
| chr4 | 18540638 | 18540662 | CSAR_peak_! | 8.52,10.02     | + |
| chr4 | 18541250 | 18541372 | CSAR_peak_! | 7.92,7.27      | + |
| chr4 | 18543418 | 18543466 | CSAR_peak_! | 6.03           | + |
| chr4 | 70729    | 70764    | CSAR_peak_! | 12.31          | - |
| chr4 | 72997    | 73054    | CSAR_peak_! | 9.58           | - |
| chr4 | 74279    | 74362    | CSAR_peak_! | 7.58           | - |
| chr4 | 142818   | 142880   | CSAR_peak_! | 9.58           | - |
| chr4 | 142894   | 143024   | CSAR_peak_! | 14.88,9.27     | - |
| chr4 | 143070   | 143138   | CSAR_peak_! | 11.03,25.91,;- | - |
| chr4 | 143290   | 143327   | CSAR_peak_! | 7.27           | - |
| chr4 | 143644   | 143690   | CSAR_peak_! | 10.02          | - |
| chr4 | 143756   | 143849   | CSAR_peak_! | 9.58           | - |
| chr4 | 143927   | 144115   | CSAR_peak_! | 14.88,17.37    | - |
| chr4 | 144378   | 144418   | CSAR_peak_! | 10.83          | - |
| chr4 | 238585   | 238651   | CSAR_peak_! | 8.39,10.83     | - |
| chr4 | 238765   | 238828   | CSAR_peak_! | 9.58,9.55      | - |
| chr4 | 239175   | 239215   | CSAR_peak_! | 6.21           | - |
| chr4 | 239361   | 239432   | CSAR_peak_! | 8.39           | - |
| chr4 | 240437   | 240491   | CSAR_peak_! | 7.27           | - |
| chr4 | 241106   | 241156   | CSAR_peak_! | 12.13,8.39     | - |
| chr4 | 241865   | 241919   | CSAR_peak_! | 7.27           | - |
| chr4 | 242353   | 242401   | CSAR_peak_! | 6.21           | - |
| chr4 | 242994   | 243083   | CSAR_peak_! | 7.92           | - |
| chr4 | 243208   | 243260   | CSAR_peak_! | 9.58           | - |
| chr4 | 243346   | 243433   | CSAR_peak_! | 16.11          | - |
| chr4 | 243551   | 243606   | CSAR_peak_! | 6.74,10.02     | - |
| chr4 | 243654   | 243788   | CSAR_peak_! | 6.81,7.11,8.3- | - |
| chr4 | 244250   | 244327   | CSAR_peak_! | 8.14,17.82     | - |
| chr4 | 244895   | 244984   | CSAR_peak_! | 10.02,7.27     | - |
| chr4 | 245087   | 245157   | CSAR_peak_! | 7.27           | - |
| chr4 | 245249   | 245353   | CSAR_peak_! | 6.03,8.14,13.- | - |
| chr4 | 245693   | 245726   | CSAR_peak_! | 9.58           | - |
| chr4 | 245967   | 246063   | CSAR_peak_! | 10.94          | - |
| chr4 | 246069   | 246086   | CSAR_peak_! | 6.03           | - |
| chr4 | 246524   | 246558   | CSAR_peak_! | 8.39           | - |
| chr4 | 259830   | 259865   | CSAR_peak_! | 6.21           | - |

|      |        |        |            |              |   |
|------|--------|--------|------------|--------------|---|
| chr4 | 262778 | 262830 | CSAR_peak_ | 6.21         | - |
| chr4 | 266490 | 266540 | CSAR_peak_ | 7.27         | - |
| chr4 | 266636 | 266706 | CSAR_peak_ | 7.27         | - |
| chr4 | 267211 | 267294 | CSAR_peak_ | 7.27         | - |
| chr4 | 267300 | 267373 | CSAR_peak_ | 9.58         | - |
| chr4 | 267408 | 267472 | CSAR_peak_ | 7.27         | - |
| chr4 | 292641 | 292697 | CSAR_peak_ | 10.83        | - |
| chr4 | 292932 | 293011 | CSAR_peak_ | 6.21,8.39    | - |
| chr4 | 293540 | 293584 | CSAR_peak_ | 7.27         | - |
| chr4 | 293665 | 293714 | CSAR_peak_ | 10.83        | - |
| chr4 | 293961 | 294013 | CSAR_peak_ | 7.34         | - |
| chr4 | 294100 | 294200 | CSAR_peak_ | 10.83,7.27   | - |
| chr4 | 294250 | 294300 | CSAR_peak_ | 9.58,6.21    | - |
| chr4 | 294592 | 294687 | CSAR_peak_ | 9.58,14.88   | - |
| chr4 | 294792 | 294857 | CSAR_peak_ | 12.31        | - |
| chr4 | 294937 | 295016 | CSAR_peak_ | 13.48,6.21   | - |
| chr4 | 295112 | 295137 | CSAR_peak_ | 12.13,7.58   | - |
| chr4 | 295713 | 295772 | CSAR_peak_ | 7.27         | - |
| chr4 | 295824 | 295952 | CSAR_peak_ | 7.58,8.65    | - |
| chr4 | 296063 | 296100 | CSAR_peak_ | 9.77         | - |
| chr4 | 296244 | 296337 | CSAR_peak_ | 17.87        | - |
| chr4 | 296414 | 296567 | CSAR_peak_ | 6.12,20.18,1 | - |
| chr4 | 296605 | 296633 | CSAR_peak_ | 7.27         | - |
| chr4 | 296943 | 297072 | CSAR_peak_ | 13.44,8.95   | - |
| chr4 | 300834 | 300956 | CSAR_peak_ | 8.39,9.58    | - |
| chr4 | 302212 | 302248 | CSAR_peak_ | 5.86         | - |
| chr4 | 303219 | 303302 | CSAR_peak_ | 30.02,8.65   | - |
| chr4 | 303376 | 303428 | CSAR_peak_ | 14.88        | - |
| chr4 | 307866 | 307906 | CSAR_peak_ | 7.27         | - |
| chr4 | 308023 | 308038 | CSAR_peak_ | 13.48,12.13  | - |
| chr4 | 308128 | 308174 | CSAR_peak_ | 13.48,10.83  | - |
| chr4 | 308862 | 308915 | CSAR_peak_ | 17.82,6.21   | - |
| chr4 | 309503 | 309544 | CSAR_peak_ | 9.58         | - |
| chr4 | 309867 | 309912 | CSAR_peak_ | 6.21         | - |
| chr4 | 328656 | 328712 | CSAR_peak_ | 12.13        | - |
| chr4 | 337485 | 337582 | CSAR_peak_ | 7.27         | - |
| chr4 | 337840 | 337847 | CSAR_peak_ | 7.27,8.39    | - |
| chr4 | 337948 | 338013 | CSAR_peak_ | 33.31,30.53  | - |
| chr4 | 338240 | 338302 | CSAR_peak_ | 8.39,9.58    | - |
| chr4 | 338717 | 338766 | CSAR_peak_ | 9.58,7.58    | - |
| chr4 | 338849 | 338930 | CSAR_peak_ | 6.21         | - |
| chr4 | 339420 | 339468 | CSAR_peak_ | 12.13,7.27   | - |

|      |        |                   |                |   |
|------|--------|-------------------|----------------|---|
| chr4 | 339933 | 339985 CSAR_peak_ | 7.27           | - |
| chr4 | 340472 | 340563 CSAR_peak_ | 12.17,12.17    | - |
| chr4 | 340897 | 340924 CSAR_peak_ | 14.76          | - |
| chr4 | 341195 | 341270 CSAR_peak_ | 16.34,21.22    | - |
| chr4 | 341477 | 341549 CSAR_peak_ | 10.02          | - |
| chr4 | 341666 | 341693 CSAR_peak_ | 8.95,6.85      | - |
| chr4 | 342278 | 342319 CSAR_peak_ | 9.27,12.13     | - |
| chr4 | 342321 | 342464 CSAR_peak_ | 18.95,10.95    | - |
| chr4 | 343087 | 343144 CSAR_peak_ | 9.58           | - |
| chr4 | 343391 | 343456 CSAR_peak_ | 6.21           | - |
| chr4 | 343756 | 343801 CSAR_peak_ | 12.31          | - |
| chr4 | 343912 | 343949 CSAR_peak_ | 12.17          | - |
| chr4 | 344356 | 344420 CSAR_peak_ | 6.21,24.21     | - |
| chr4 | 344451 | 344494 CSAR_peak_ | 7.27,12.13     | - |
| chr4 | 344525 | 344601 CSAR_peak_ | 13.48,8.2,7.5- | - |
| chr4 | 344656 | 344735 CSAR_peak_ | 9.58           | - |
| chr4 | 344961 | 345011 CSAR_peak_ | 6.21,8.39      | - |
| chr4 | 346920 | 346976 CSAR_peak_ | 9.77           | - |
| chr4 | 359549 | 359632 CSAR_peak_ | 10.83          | - |
| chr4 | 359669 | 359709 CSAR_peak_ | 9.58           | - |
| chr4 | 359778 | 359829 CSAR_peak_ | 9.58           | - |
| chr4 | 359846 | 359876 CSAR_peak_ | 6.21           | - |
| chr4 | 360136 | 360190 CSAR_peak_ | 6.21           | - |
| chr4 | 384975 | 385052 CSAR_peak_ | 8.39           | - |
| chr4 | 413928 | 413993 CSAR_peak_ | 10.02          | - |
| chr4 | 431086 | 431150 CSAR_peak_ | 12.13,12.13    | - |
| chr4 | 431537 | 431581 CSAR_peak_ | 6.21           | - |
| chr4 | 432237 | 432295 CSAR_peak_ | 13.29          | - |
| chr4 | 432506 | 432731 CSAR_peak_ | 8.65,7.27,13.- | - |
| chr4 | 432759 | 432868 CSAR_peak_ | 13.29          | - |
| chr4 | 432891 | 432930 CSAR_peak_ | 14.88          | - |
| chr4 | 433115 | 433213 CSAR_peak_ | 10.95          | - |
| chr4 | 433223 | 433322 CSAR_peak_ | 6.81,7.27,12.- | - |
| chr4 | 433405 | 433480 CSAR_peak_ | 13,9.77        | - |
| chr4 | 436214 | 436266 CSAR_peak_ | 13.48          | - |
| chr4 | 470982 | 471180 CSAR_peak_ | 9.58,40.88,1-  | - |
| chr4 | 471351 | 471360 CSAR_peak_ | 7.27           | - |
| chr4 | 471447 | 471514 CSAR_peak_ | 13.48,10.83    | - |
| chr4 | 471988 | 472031 CSAR_peak_ | 6.57           | - |
| chr4 | 473190 | 473226 CSAR_peak_ | 6.21           | - |
| chr4 | 473263 | 473304 CSAR_peak_ | 12.13          | - |
| chr4 | 482039 | 482073 CSAR_peak_ | 16.05,15       | - |

|      |        |        |            |                |
|------|--------|--------|------------|----------------|
| chr4 | 482128 | 482273 | CSAR_peak_ | 5.86,38.29,21- |
| chr4 | 482366 | 482473 | CSAR_peak_ | 19.98 -        |
| chr4 | 482767 | 482820 | CSAR_peak_ | 8.39 -         |
| chr4 | 482907 | 482952 | CSAR_peak_ | 12.13,12.13 -  |
| chr4 | 483034 | 483140 | CSAR_peak_ | 17.37,17.51 -  |
| chr4 | 483189 | 483280 | CSAR_peak_ | 8.39,5.86,16.- |
| chr4 | 483914 | 483983 | CSAR_peak_ | 7.27 -         |
| chr4 | 507766 | 507842 | CSAR_peak_ | 7.58,14.85 -   |
| chr4 | 507948 | 508058 | CSAR_peak_ | 7.27 -         |
| chr4 | 508155 | 508194 | CSAR_peak_ | 7.27 -         |
| chr4 | 508294 | 508341 | CSAR_peak_ | 7.27,6.21 -    |
| chr4 | 508532 | 508618 | CSAR_peak_ | 12.13 -        |
| chr4 | 508714 | 508753 | CSAR_peak_ | 7.27 -         |
| chr4 | 508973 | 509026 | CSAR_peak_ | 9.77 -         |
| chr4 | 509336 | 509461 | CSAR_peak_ | 12.31,10.83 -  |
| chr4 | 509547 | 509666 | CSAR_peak_ | 12.13,7.27,7.- |
| chr4 | 509678 | 509785 | CSAR_peak_ | 7.27 -         |
| chr4 | 511364 | 511426 | CSAR_peak_ | 9.58 -         |
| chr4 | 511603 | 511644 | CSAR_peak_ | 6.21 -         |
| chr4 | 522754 | 522896 | CSAR_peak_ | 7.27 -         |
| chr4 | 523089 | 523175 | CSAR_peak_ | 7.92,17.82 -   |
| chr4 | 523193 | 523280 | CSAR_peak_ | 13.48,12.17 -  |
| chr4 | 523480 | 523594 | CSAR_peak_ | 5.79,12.13,8.- |
| chr4 | 523868 | 523949 | CSAR_peak_ | 10.83,6.02 -   |
| chr4 | 523990 | 524028 | CSAR_peak_ | 9.58 -         |
| chr4 | 524090 | 524137 | CSAR_peak_ | 9.58 -         |
| chr4 | 537316 | 537371 | CSAR_peak_ | 6.21 -         |
| chr4 | 538313 | 538366 | CSAR_peak_ | 10.83 -        |
| chr4 | 539994 | 540030 | CSAR_peak_ | 7.27 -         |
| chr4 | 540513 | 540583 | CSAR_peak_ | 12.74,7.27 -   |
| chr4 | 540742 | 540789 | CSAR_peak_ | 7.27 -         |
| chr4 | 542113 | 542225 | CSAR_peak_ | 7.27,13.48 -   |
| chr4 | 542334 | 542362 | CSAR_peak_ | 6.57 -         |
| chr4 | 542701 | 542753 | CSAR_peak_ | 18.73,5.95 -   |
| chr4 | 542775 | 542807 | CSAR_peak_ | 6.03 -         |
| chr4 | 542834 | 542912 | CSAR_peak_ | 6.95 -         |
| chr4 | 543017 | 543079 | CSAR_peak_ | 8.95,13.66 -   |
| chr4 | 543095 | 543125 | CSAR_peak_ | 16.33,17.82 -  |
| chr4 | 543212 | 543261 | CSAR_peak_ | 14.88,19.36 -  |
| chr4 | 543310 | 543375 | CSAR_peak_ | 16.33 -        |
| chr4 | 543529 | 543585 | CSAR_peak_ | 9.58 -         |
| chr4 | 544914 | 544947 | CSAR_peak_ | 6.21 -         |

|      |        |        |            |               |   |
|------|--------|--------|------------|---------------|---|
| chr4 | 661508 | 661617 | CSAR_peak_ | 7.27,9.58     | - |
| chr4 | 670400 | 670459 | CSAR_peak_ | 7.27          | - |
| chr4 | 670467 | 670506 | CSAR_peak_ | 7.27          | - |
| chr4 | 671392 | 671436 | CSAR_peak_ | 7.27          | - |
| chr4 | 675871 | 675922 | CSAR_peak_ | 7.27          | - |
| chr4 | 676082 | 676118 | CSAR_peak_ | 9.58          | - |
| chr4 | 678755 | 678836 | CSAR_peak_ | 27.64,6.21    | - |
| chr4 | 691642 | 691705 | CSAR_peak_ | 13.48,7.73    | - |
| chr4 | 770960 | 771064 | CSAR_peak_ | 15.68,11.96,  | - |
| chr4 | 771147 | 771214 | CSAR_peak_ | 17.82,6.03    | - |
| chr4 | 771232 | 771339 | CSAR_peak_ | 8.39,6.21     | - |
| chr4 | 771487 | 771585 | CSAR_peak_ | 8.65,26.69    | - |
| chr4 | 771843 | 771975 | CSAR_peak_ | 10.95,7.58,14 | - |
| chr4 | 772066 | 772117 | CSAR_peak_ | 6.81          | - |
| chr4 | 772173 | 772222 | CSAR_peak_ | 9.27,5.86,8.3 | - |
| chr4 | 772372 | 772441 | CSAR_peak_ | 12.59,8.28    | - |
| chr4 | 772523 | 772567 | CSAR_peak_ | 9.27          | - |
| chr4 | 772597 | 772619 | CSAR_peak_ | 9.77          | - |
| chr4 | 772699 | 772735 | CSAR_peak_ | 8.39,7.27     | - |
| chr4 | 772768 | 772822 | CSAR_peak_ | 6.03          | - |
| chr4 | 773203 | 773317 | CSAR_peak_ | 17.51,19.36   | - |
| chr4 | 773346 | 773370 | CSAR_peak_ | 6.03,6.21,7.2 | - |
| chr4 | 773591 | 773646 | CSAR_peak_ | 12.31,6.57    | - |
| chr4 | 773665 | 773716 | CSAR_peak_ | 16.11         | - |
| chr4 | 773728 | 773759 | CSAR_peak_ | 6.51,8.14     | - |
| chr4 | 774017 | 774060 | CSAR_peak_ | 6.21,8.14     | - |
| chr4 | 774080 | 774143 | CSAR_peak_ | 12.13,6.81    | - |
| chr4 | 774233 | 774293 | CSAR_peak_ | 8.39          | - |
| chr4 | 774500 | 774555 | CSAR_peak_ | 9.58          | - |
| chr4 | 774600 | 774627 | CSAR_peak_ | 6.44          | - |
| chr4 | 774649 | 774690 | CSAR_peak_ | 29.4,6.02     | - |
| chr4 | 774794 | 774851 | CSAR_peak_ | 21.94,21.94   | - |
| chr4 | 775071 | 775122 | CSAR_peak_ | 8.39          | - |
| chr4 | 775278 | 775382 | CSAR_peak_ | 10.12,9.03,7  | - |
| chr4 | 775410 | 775474 | CSAR_peak_ | 8.39          | - |
| chr4 | 775566 | 775601 | CSAR_peak_ | 8.39          | - |
| chr4 | 775743 | 775820 | CSAR_peak_ | 12.13         | - |
| chr4 | 776802 | 776872 | CSAR_peak_ | 14.88,9.58    | - |
| chr4 | 777390 | 777448 | CSAR_peak_ | 7.27          | - |
| chr4 | 796329 | 796371 | CSAR_peak_ | 9.58          | - |
| chr4 | 796396 | 796518 | CSAR_peak_ | 12.13,6.03    | - |
| chr4 | 796596 | 796687 | CSAR_peak_ | 19.36,6.52    | - |

|      |        |        |            |                  |   |
|------|--------|--------|------------|------------------|---|
| chr4 | 797391 | 797467 | CSAR_peak_ | 9.77,7.27        | - |
| chr4 | 797787 | 797837 | CSAR_peak_ | 7.27             | - |
| chr4 | 798202 | 798262 | CSAR_peak_ | 12.13,9.58       | - |
| chr4 | 801359 | 801436 | CSAR_peak_ | 9.58,8.39        | - |
| chr4 | 801707 | 801784 | CSAR_peak_ | 10.94,6.95       | - |
| chr4 | 802012 | 802062 | CSAR_peak_ | 9.58             | - |
| chr4 | 802110 | 802285 | CSAR_peak_ | 12.17,17.82,9.58 | - |
| chr4 | 802300 | 802341 | CSAR_peak_ | 8.39             | - |
| chr4 | 802422 | 802570 | CSAR_peak_ | 24.21,20.43      | - |
| chr4 | 802590 | 802773 | CSAR_peak_ | 21.96,34.93      | - |
| chr4 | 802903 | 803030 | CSAR_peak_ | 30.81,21.56      | - |
| chr4 | 803228 | 803440 | CSAR_peak_ | 29.2,28.21       | - |
| chr4 | 803473 | 803542 | CSAR_peak_ | 13.51,6.03       | - |
| chr4 | 803679 | 803792 | CSAR_peak_ | 21.53,8.2,6.03   | - |
| chr4 | 803852 | 803960 | CSAR_peak_ | 9.79,22.52,7.27  | - |
| chr4 | 804021 | 804079 | CSAR_peak_ | 17.82,14.88      | - |
| chr4 | 804091 | 804190 | CSAR_peak_ | 15.86,5.86,9.58  | - |
| chr4 | 804237 | 804282 | CSAR_peak_ | 9.58,8.39        | - |
| chr4 | 804298 | 804425 | CSAR_peak_ | 8.95,42.64,3.03  | - |
| chr4 | 804437 | 804522 | CSAR_peak_ | 9.72,6.72        | - |
| chr4 | 804785 | 804959 | CSAR_peak_ | 31.2,36.78,8.39  | - |
| chr4 | 805122 | 805313 | CSAR_peak_ | 14.88,14.76      | - |
| chr4 | 805373 | 805719 | CSAR_peak_ | 22.56,13.85,9.58 | - |
| chr4 | 805747 | 805812 | CSAR_peak_ | 6.45             | - |
| chr4 | 805841 | 805934 | CSAR_peak_ | 13.48,6.21       | - |
| chr4 | 805989 | 806057 | CSAR_peak_ | 11.14,8.2,18.39  | - |
| chr4 | 806104 | 806215 | CSAR_peak_ | 9.77,7.58        | - |
| chr4 | 806305 | 806342 | CSAR_peak_ | 12.13            | - |
| chr4 | 806646 | 806727 | CSAR_peak_ | 9.58,7.27,8.27   | - |
| chr4 | 806758 | 806782 | CSAR_peak_ | 6.95             | - |
| chr4 | 806867 | 806959 | CSAR_peak_ | 16.05,17.37      | - |
| chr4 | 807007 | 807094 | CSAR_peak_ | 8.39,12.13       | - |
| chr4 | 807169 | 807244 | CSAR_peak_ | 9.55,7.92,6.95   | - |
| chr4 | 807285 | 807380 | CSAR_peak_ | 33.47,12.13      | - |
| chr4 | 807390 | 807511 | CSAR_peak_ | 10.18,11.03,9.58 | - |
| chr4 | 807527 | 807732 | CSAR_peak_ | 20.94,16.11,9.58 | - |
| chr4 | 807784 | 807836 | CSAR_peak_ | 13.48            | - |
| chr4 | 808474 | 808589 | CSAR_peak_ | 20.18,22.83      | - |
| chr4 | 808639 | 808698 | CSAR_peak_ | 12.31,14.88      | - |
| chr4 | 808710 | 808764 | CSAR_peak_ | 12.94            | - |
| chr4 | 808794 | 808876 | CSAR_peak_ | 13.51,17.4       | - |
| chr4 | 808943 | 809015 | CSAR_peak_ | 6.03             | - |

|      |         |         |            |                   |   |
|------|---------|---------|------------|-------------------|---|
| chr4 | 809321  | 809371  | CSAR_peak_ | 9.58              | - |
| chr4 | 809560  | 809665  | CSAR_peak_ | 17.82,18.73       | - |
| chr4 | 810040  | 810127  | CSAR_peak_ | 10.02,6.21        | - |
| chr4 | 810185  | 810317  | CSAR_peak_ | 6.57,6.21         | - |
| chr4 | 810377  | 810442  | CSAR_peak_ | 12.13             | - |
| chr4 | 812427  | 812478  | CSAR_peak_ | 8.39              | - |
| chr4 | 812799  | 812846  | CSAR_peak_ | 7.27              | - |
| chr4 | 842334  | 842380  | CSAR_peak_ | 7.34,6.03         | - |
| chr4 | 844570  | 844646  | CSAR_peak_ | 8.39              | - |
| chr4 | 844693  | 844752  | CSAR_peak_ | 7.27              | - |
| chr4 | 844938  | 845019  | CSAR_peak_ | 10.83             | - |
| chr4 | 845040  | 845105  | CSAR_peak_ | 14.88,7.27        | - |
| chr4 | 846162  | 846199  | CSAR_peak_ | 9.77              | - |
| chr4 | 846204  | 846349  | CSAR_peak_ | 14.85,7.27,10.83  | - |
| chr4 | 846377  | 846396  | CSAR_peak_ | 6.21              | - |
| chr4 | 877336  | 877390  | CSAR_peak_ | 9.58              | - |
| chr4 | 878046  | 878122  | CSAR_peak_ | 6.21,9.58         | - |
| chr4 | 899157  | 899223  | CSAR_peak_ | 7.27              | - |
| chr4 | 914248  | 914305  | CSAR_peak_ | 14.88,10.02       | - |
| chr4 | 915383  | 915408  | CSAR_peak_ | 6.02              | - |
| chr4 | 970640  | 970686  | CSAR_peak_ | 5.86              | - |
| chr4 | 971602  | 971654  | CSAR_peak_ | 6.21              | - |
| chr4 | 971658  | 971703  | CSAR_peak_ | 9.58              | - |
| chr4 | 1046338 | 1046379 | CSAR_peak_ | 12.17             | - |
| chr4 | 1046416 | 1046496 | CSAR_peak_ | 9.58,9.27         | - |
| chr4 | 1046626 | 1046664 | CSAR_peak_ | 6.21              | - |
| chr4 | 1046731 | 1046802 | CSAR_peak_ | 9.58,12.13        | - |
| chr4 | 1058598 | 1058658 | CSAR_peak_ | 8.39,6.21         | - |
| chr4 | 1074648 | 1074678 | CSAR_peak_ | 7.27              | - |
| chr4 | 1074785 | 1074844 | CSAR_peak_ | 10.82,9.58        | - |
| chr4 | 1082149 | 1082213 | CSAR_peak_ | 11.66,14.88       | - |
| chr4 | 1082279 | 1082374 | CSAR_peak_ | 9.27,14.88        | - |
| chr4 | 1082483 | 1082548 | CSAR_peak_ | 6.52,8.28,11.66   | - |
| chr4 | 1082617 | 1082743 | CSAR_peak_ | 7.92,20.44,10.83  | - |
| chr4 | 1082858 | 1083004 | CSAR_peak_ | 23.95,9.27,6.21   | - |
| chr4 | 1083012 | 1083043 | CSAR_peak_ | 10.76             | - |
| chr4 | 1083148 | 1083189 | CSAR_peak_ | 25.91             | - |
| chr4 | 1083331 | 1083438 | CSAR_peak_ | 12.6,17.4         | - |
| chr4 | 1083523 | 1083735 | CSAR_peak_ | 18.65,38.71,10.83 | - |
| chr4 | 1083786 | 1083855 | CSAR_peak_ | 27.67,42.64       | - |
| chr4 | 1083947 | 1083992 | CSAR_peak_ | 7.27              | - |
| chr4 | 1084017 | 1084032 | CSAR_peak_ | 7.27              | - |

|      |         |         |            |                |   |
|------|---------|---------|------------|----------------|---|
| chr4 | 1084117 | 1084193 | CSAR_peak_ | 18.95,18.61    | - |
| chr4 | 1084289 | 1084402 | CSAR_peak_ | 36.89,8.65,6.  | - |
| chr4 | 1084456 | 1084512 | CSAR_peak_ | 26.69,18.95    | - |
| chr4 | 1084515 | 1084558 | CSAR_peak_ | 20.54          | - |
| chr4 | 1084704 | 1084776 | CSAR_peak_ | 9.61,23.95     | - |
| chr4 | 1084863 | 1085043 | CSAR_peak_ | 8.2,20.52,22.  | - |
| chr4 | 1085139 | 1085206 | CSAR_peak_ | 12.94          | - |
| chr4 | 1085287 | 1085387 | CSAR_peak_ | 7.27,6.44      | - |
| chr4 | 1085533 | 1085595 | CSAR_peak_ | 9.58,9.77      | - |
| chr4 | 1085683 | 1085733 | CSAR_peak_ | 12.13          | - |
| chr4 | 1085802 | 1085980 | CSAR_peak_ | 19.36,10.83,{- | - |
| chr4 | 1086321 | 1086422 | CSAR_peak_ | 21.56,9.77     | - |
| chr4 | 1086514 | 1086597 | CSAR_peak_ | 14.88          | - |
| chr4 | 1086777 | 1086827 | CSAR_peak_ | 8.39,6.21      | - |
| chr4 | 1086846 | 1086925 | CSAR_peak_ | 10.83,6.02     | - |
| chr4 | 1087008 | 1087209 | CSAR_peak_ | 10.95,25.07    | - |
| chr4 | 1087528 | 1087603 | CSAR_peak_ | 9.58,6.21      | - |
| chr4 | 1087617 | 1087689 | CSAR_peak_ | 16.33,6.03     | - |
| chr4 | 1087692 | 1087701 | CSAR_peak_ | 6.21           | - |
| chr4 | 1087769 | 1087873 | CSAR_peak_ | 10.83,17.82    | - |
| chr4 | 1088036 | 1088093 | CSAR_peak_ | 8.65           | - |
| chr4 | 1088197 | 1088307 | CSAR_peak_ | 28.34,40.66    | - |
| chr4 | 1088367 | 1088476 | CSAR_peak_ | 7.27           | - |
| chr4 | 1088655 | 1088697 | CSAR_peak_ | 12.13          | - |
| chr4 | 1088715 | 1088757 | CSAR_peak_ | 7.27           | - |
| chr4 | 1110505 | 1110562 | CSAR_peak_ | 7.58           | - |
| chr4 | 1110975 | 1111051 | CSAR_peak_ | 7.58           | - |
| chr4 | 1111059 | 1111127 | CSAR_peak_ | 7.27           | - |
| chr4 | 1111479 | 1111534 | CSAR_peak_ | 8.39,6.21      | - |
| chr4 | 1113843 | 1113931 | CSAR_peak_ | 6.21           | - |
| chr4 | 1114507 | 1114633 | CSAR_peak_ | 8.2,5.62,9.77- | - |
| chr4 | 1125135 | 1125183 | CSAR_peak_ | 17.82          | - |
| chr4 | 1125683 | 1125732 | CSAR_peak_ | 9.58           | - |
| chr4 | 1138081 | 1138174 | CSAR_peak_ | 15.2,24.17     | - |
| chr4 | 1138332 | 1138378 | CSAR_peak_ | 8.39           | - |
| chr4 | 1139183 | 1139259 | CSAR_peak_ | 34.84,11.83    | - |
| chr4 | 1139417 | 1139466 | CSAR_peak_ | 25.62,10.83    | - |
| chr4 | 1149538 | 1149578 | CSAR_peak_ | 6.95           | - |
| chr4 | 1201210 | 1201267 | CSAR_peak_ | 16.33,12.13    | - |
| chr4 | 1201872 | 1201969 | CSAR_peak_ | 10.83,9.58     | - |
| chr4 | 1202026 | 1202072 | CSAR_peak_ | 8.39           | - |
| chr4 | 1202122 | 1202181 | CSAR_peak_ | 6.21           | - |



|      |         |         |            |                   |   |
|------|---------|---------|------------|-------------------|---|
| chr4 | 1204646 | 1204706 | CSAR_peak_ | 7.27              | - |
| chr4 | 1205050 | 1205166 | CSAR_peak_ | 9.55,11.28        | - |
| chr4 | 1205236 | 1205292 | CSAR_peak_ | 6.21,7.27         | - |
| chr4 | 1205512 | 1205617 | CSAR_peak_ | 7.27              | - |
| chr4 | 1217765 | 1217943 | CSAR_peak_ | 14.85,15.9,16.21  | - |
| chr4 | 1218366 | 1218429 | CSAR_peak_ | 7.27              | - |
| chr4 | 1218687 | 1218752 | CSAR_peak_ | 5.86,7.73,17.17   | - |
| chr4 | 1218838 | 1218898 | CSAR_peak_ | 27.64,24.52       | - |
| chr4 | 1218916 | 1218973 | CSAR_peak_ | 8.39              | - |
| chr4 | 1221259 | 1221372 | CSAR_peak_ | 6.81              | - |
| chr4 | 1222460 | 1222521 | CSAR_peak_ | 12.17             | - |
| chr4 | 1222535 | 1222603 | CSAR_peak_ | 13.48,16.33       | - |
| chr4 | 1222789 | 1222862 | CSAR_peak_ | 17.82,6.21        | - |
| chr4 | 1222973 | 1223124 | CSAR_peak_ | 10.83,13.48       | - |
| chr4 | 1224307 | 1224391 | CSAR_peak_ | 8.65              | - |
| chr4 | 1224475 | 1224563 | CSAR_peak_ | 17.82,7.27        | - |
| chr4 | 1224589 | 1224645 | CSAR_peak_ | 19.36,8.28        | - |
| chr4 | 1224730 | 1224780 | CSAR_peak_ | 24.21,8.39        | - |
| chr4 | 1225131 | 1225223 | CSAR_peak_ | 11.83,7.27        | - |
| chr4 | 1225387 | 1225404 | CSAR_peak_ | 9.58              | - |
| chr4 | 1225486 | 1225559 | CSAR_peak_ | 26.69,9.58        | - |
| chr4 | 1225679 | 1225751 | CSAR_peak_ | 14.88,15          | - |
| chr4 | 1225800 | 1225881 | CSAR_peak_ | 10.02,9.77        | - |
| chr4 | 1225892 | 1226014 | CSAR_peak_ | 9.58,13.48,16.21  | - |
| chr4 | 1226111 | 1226168 | CSAR_peak_ | 7.27,7.27         | - |
| chr4 | 1226318 | 1226417 | CSAR_peak_ | 16.36,8.9         | - |
| chr4 | 1226617 | 1226667 | CSAR_peak_ | 8.65              | - |
| chr4 | 1227084 | 1227231 | CSAR_peak_ | 10.82,13.48,16.21 | - |
| chr4 | 1227566 | 1227657 | CSAR_peak_ | 8.14,8.95,7.27    | - |
| chr4 | 1228401 | 1228436 | CSAR_peak_ | 6.21              | - |
| chr4 | 1228672 | 1228829 | CSAR_peak_ | 8.39,9.58,7.27    | - |
| chr4 | 1229309 | 1229369 | CSAR_peak_ | 15.2              | - |
| chr4 | 1229446 | 1229581 | CSAR_peak_ | 14.85,9.61,24.52  | - |
| chr4 | 1267001 | 1267045 | CSAR_peak_ | 7.27              | - |
| chr4 | 1269014 | 1269064 | CSAR_peak_ | 14.88             | - |
| chr4 | 1269200 | 1269228 | CSAR_peak_ | 6.03              | - |
| chr4 | 1269331 | 1269419 | CSAR_peak_ | 9.58              | - |
| chr4 | 1269425 | 1269481 | CSAR_peak_ | 6.21,7.27         | - |
| chr4 | 1269749 | 1269827 | CSAR_peak_ | 7.27              | - |
| chr4 | 1269865 | 1269907 | CSAR_peak_ | 7.27              | - |
| chr4 | 1278864 | 1278939 | CSAR_peak_ | 27.64,6.85        | - |
| chr4 | 1279011 | 1279144 | CSAR_peak_ | 6.21,16.23,16.21  | - |

|      |         |         |            |                |   |
|------|---------|---------|------------|----------------|---|
| chr4 | 1279246 | 1279273 | CSAR_peak_ | 7.27           | - |
| chr4 | 1279274 | 1279328 | CSAR_peak_ | 16.33          | - |
| chr4 | 1279340 | 1279421 | CSAR_peak_ | 12.72,9.25     | - |
| chr4 | 1279455 | 1279684 | CSAR_peak_ | 21.32,10.31,-  | - |
| chr4 | 1279766 | 1279820 | CSAR_peak_ | 12.13,8.65     | - |
| chr4 | 1279947 | 1279999 | CSAR_peak_ | 13.44          | - |
| chr4 | 1318985 | 1319035 | CSAR_peak_ | 12.43          | - |
| chr4 | 1332282 | 1332332 | CSAR_peak_ | 7.27           | - |
| chr4 | 1332762 | 1332820 | CSAR_peak_ | 12.13,9.58     | - |
| chr4 | 1332955 | 1333023 | CSAR_peak_ | 6.95,8.39      | - |
| chr4 | 1334372 | 1334482 | CSAR_peak_ | 8.39           | - |
| chr4 | 1334484 | 1334537 | CSAR_peak_ | 7.27,9.58      | - |
| chr4 | 1360888 | 1360955 | CSAR_peak_ | 19.36          | - |
| chr4 | 1361159 | 1361178 | CSAR_peak_ | 6.21           | - |
| chr4 | 1361335 | 1361429 | CSAR_peak_ | 12.13,6.21,9.- | - |
| chr4 | 1361521 | 1361593 | CSAR_peak_ | 18.95,9.58     | - |
| chr4 | 1362164 | 1362187 | CSAR_peak_ | 6.85           | - |
| chr4 | 1362328 | 1362401 | CSAR_peak_ | 19.98,9.27     | - |
| chr4 | 1362483 | 1362539 | CSAR_peak_ | 7.92           | - |
| chr4 | 1362789 | 1362805 | CSAR_peak_ | 10.95          | - |
| chr4 | 1363024 | 1363097 | CSAR_peak_ | 12.5           | - |
| chr4 | 1363105 | 1363144 | CSAR_peak_ | 9.58           | - |
| chr4 | 1363283 | 1363343 | CSAR_peak_ | 5.62,10.95     | - |
| chr4 | 1363674 | 1363690 | CSAR_peak_ | 7.58           | - |
| chr4 | 1363888 | 1363938 | CSAR_peak_ | 8.65,6.44      | - |
| chr4 | 1364041 | 1364141 | CSAR_peak_ | 13.51,7.27     | - |
| chr4 | 1364422 | 1364487 | CSAR_peak_ | 20.94          | - |
| chr4 | 1364618 | 1364661 | CSAR_peak_ | 5.86,6.95      | - |
| chr4 | 1376625 | 1376791 | CSAR_peak_ | 17.82,17.4     | - |
| chr4 | 1376884 | 1376916 | CSAR_peak_ | 6.21           | - |
| chr4 | 1377090 | 1377146 | CSAR_peak_ | 7.27           | - |
| chr4 | 1377260 | 1377339 | CSAR_peak_ | 16.08,19.36    | - |
| chr4 | 1377611 | 1377674 | CSAR_peak_ | 17.4           | - |
| chr4 | 1377794 | 1377855 | CSAR_peak_ | 14.88,9.58     | - |
| chr4 | 1379104 | 1379148 | CSAR_peak_ | 9.77,7.27      | - |
| chr4 | 1379239 | 1379297 | CSAR_peak_ | 7.34           | - |
| chr4 | 1405153 | 1405230 | CSAR_peak_ | 14.88          | - |
| chr4 | 1423745 | 1423781 | CSAR_peak_ | 6.44           | - |
| chr4 | 1445728 | 1445764 | CSAR_peak_ | 19.32,12.27,-  | - |
| chr4 | 1445813 | 1445855 | CSAR_peak_ | 26.69,20.58,-  | - |
| chr4 | 1445874 | 1445956 | CSAR_peak_ | 51.27,20.52,-  | - |
| chr4 | 1445994 | 1446088 | CSAR_peak_ | 30.93,13.24,-  | - |

|      |         |         |            |                |
|------|---------|---------|------------|----------------|
| chr4 | 1446116 | 1446267 | CSAR_peak_ | 11.09,11.66,-  |
| chr4 | 1469393 | 1469426 | CSAR_peak_ | 6.21 -         |
| chr4 | 1483015 | 1483087 | CSAR_peak_ | 9.55 -         |
| chr4 | 1489567 | 1489681 | CSAR_peak_ | 9.58 -         |
| chr4 | 1490485 | 1490521 | CSAR_peak_ | 9.58 -         |
| chr4 | 1490583 | 1490637 | CSAR_peak_ | 7.27 -         |
| chr4 | 1490880 | 1490934 | CSAR_peak_ | 9.58 -         |
| chr4 | 1491228 | 1491282 | CSAR_peak_ | 9.72 -         |
| chr4 | 1491337 | 1491410 | CSAR_peak_ | 6.57,6.85 -    |
| chr4 | 1491682 | 1491712 | CSAR_peak_ | 9.58 -         |
| chr4 | 1491791 | 1491896 | CSAR_peak_ | 14.88,9.58,6.- |
| chr4 | 1491996 | 1492051 | CSAR_peak_ | 7.27 -         |
| chr4 | 1492154 | 1492222 | CSAR_peak_ | 9.58,6.57 -    |
| chr4 | 1492488 | 1492507 | CSAR_peak_ | 6.21 -         |
| chr4 | 1492587 | 1492644 | CSAR_peak_ | 13.51,10.83 -  |
| chr4 | 1493107 | 1493169 | CSAR_peak_ | 13.48 -        |
| chr4 | 1493275 | 1493326 | CSAR_peak_ | 6.21 -         |
| chr4 | 1493572 | 1493624 | CSAR_peak_ | 9.58,7.27 -    |
| chr4 | 1493706 | 1493758 | CSAR_peak_ | 12.13 -        |
| chr4 | 1494200 | 1494308 | CSAR_peak_ | 7,23.03,9.77 - |
| chr4 | 1494448 | 1494506 | CSAR_peak_ | 6.21 -         |
| chr4 | 1494526 | 1494614 | CSAR_peak_ | 10.83 -        |
| chr4 | 1497796 | 1497890 | CSAR_peak_ | 6.57,12.31,1.- |
| chr4 | 1498510 | 1498554 | CSAR_peak_ | 6.21 -         |
| chr4 | 1499552 | 1499656 | CSAR_peak_ | 7.27,7.27 -    |
| chr4 | 1499664 | 1499758 | CSAR_peak_ | 14.88,9.58 -   |
| chr4 | 1503862 | 1503941 | CSAR_peak_ | 13.51 -        |
| chr4 | 1504200 | 1504242 | CSAR_peak_ | 7.58 -         |
| chr4 | 1504628 | 1504666 | CSAR_peak_ | 8.39 -         |
| chr4 | 1517246 | 1517296 | CSAR_peak_ | 7.27 -         |
| chr4 | 1517408 | 1517485 | CSAR_peak_ | 16.33,8.39 -   |
| chr4 | 1517512 | 1517621 | CSAR_peak_ | 14.85,10.02 -  |
| chr4 | 1517631 | 1517695 | CSAR_peak_ | 6.21 -         |
| chr4 | 1517712 | 1517838 | CSAR_peak_ | 13.44 -        |
| chr4 | 1518158 | 1518246 | CSAR_peak_ | 11.38,7.58,9.- |
| chr4 | 1518589 | 1518631 | CSAR_peak_ | 8.13 -         |
| chr4 | 1518679 | 1518791 | CSAR_peak_ | 16.33,24.21 -  |
| chr4 | 1518804 | 1518886 | CSAR_peak_ | 8.39,14.88 -   |
| chr4 | 1518888 | 1518948 | CSAR_peak_ | 7.27 -         |
| chr4 | 1518976 | 1519084 | CSAR_peak_ | 29.2,12.94 -   |
| chr4 | 1519101 | 1519281 | CSAR_peak_ | 14.63,26.05,-  |
| chr4 | 1519333 | 1519473 | CSAR_peak_ | 22.56,12.31 -  |

|      |         |         |            |                |   |
|------|---------|---------|------------|----------------|---|
| chr4 | 1519583 | 1519645 | CSAR_peak_ | 6.21           | - |
| chr4 | 1519667 | 1520012 | CSAR_peak_ | 37.04,19.98,,- |   |
| chr4 | 1520311 | 1520362 | CSAR_peak_ | 7.27           | - |
| chr4 | 1556225 | 1556329 | CSAR_peak_ | 20.94,12.13    | - |
| chr4 | 1556490 | 1556533 | CSAR_peak_ | 7.27           | - |
| chr4 | 1556828 | 1556891 | CSAR_peak_ | 7.27           | - |
| chr4 | 1557027 | 1557175 | CSAR_peak_ | 14.85,17.51    | - |
| chr4 | 1557294 | 1557383 | CSAR_peak_ | 31.2,29.4      | - |
| chr4 | 1557530 | 1557580 | CSAR_peak_ | 6.44           | - |
| chr4 | 1557717 | 1557847 | CSAR_peak_ | 11.38          | - |
| chr4 | 1557974 | 1558037 | CSAR_peak_ | 6.88,7.78      | - |
| chr4 | 1558117 | 1558165 | CSAR_peak_ | 12.13          | - |
| chr4 | 1558240 | 1558342 | CSAR_peak_ | 46.89,8.18     | - |
| chr4 | 1558462 | 1558703 | CSAR_peak_ | 40.66,35.24,,- |   |
| chr4 | 1559238 | 1559304 | CSAR_peak_ | 25.07,46.53    | - |
| chr4 | 1562628 | 1562713 | CSAR_peak_ | 7.27,9.58      | - |
| chr4 | 1562810 | 1562902 | CSAR_peak_ | 9.58,9.58      | - |
| chr4 | 1563360 | 1563410 | CSAR_peak_ | 6.21           | - |
| chr4 | 1563672 | 1563740 | CSAR_peak_ | 8.39           | - |
| chr4 | 1563812 | 1563861 | CSAR_peak_ | 6.95           | - |
| chr4 | 2114374 | 2114412 | CSAR_peak_ | 9.58           | - |
| chr4 | 2115158 | 2115210 | CSAR_peak_ | 7.27           | - |
| chr4 | 2115324 | 2115436 | CSAR_peak_ | 25.91,12.13    | - |
| chr4 | 2115970 | 2116040 | CSAR_peak_ | 9.58           | - |
| chr4 | 2116180 | 2116213 | CSAR_peak_ | 9.58           | - |
| chr4 | 2116369 | 2116419 | CSAR_peak_ | 7.27,14.88     | - |
| chr4 | 2116487 | 2116547 | CSAR_peak_ | 12.17,7.27     | - |
| chr4 | 2116689 | 2116798 | CSAR_peak_ | 29,24.52       | - |
| chr4 | 2116866 | 2116946 | CSAR_peak_ | 12.94,20.54    | - |
| chr4 | 2117130 | 2117219 | CSAR_peak_ | 16.33          | - |
| chr4 | 2117260 | 2117370 | CSAR_peak_ | 24.21,23.89,,- |   |
| chr4 | 2117385 | 2117431 | CSAR_peak_ | 6.21           | - |
| chr4 | 2117622 | 2117654 | CSAR_peak_ | 6.21           | - |
| chr4 | 2117739 | 2117791 | CSAR_peak_ | 9.77,8.39      | - |
| chr4 | 2117983 | 2118141 | CSAR_peak_ | 15.2,16.54     | - |
| chr4 | 2118161 | 2118266 | CSAR_peak_ | 9.58,5.62,14.- |   |
| chr4 | 2118404 | 2118466 | CSAR_peak_ | 8.65,12.5      | - |
| chr4 | 2203776 | 2203818 | CSAR_peak_ | 9.58           | - |
| chr4 | 2203822 | 2203872 | CSAR_peak_ | 11.66          | - |
| chr4 | 2328911 | 2328966 | CSAR_peak_ | 8.65,9.77      | - |
| chr4 | 2329270 | 2329323 | CSAR_peak_ | 7.78,10.83     | - |
| chr4 | 2329402 | 2329470 | CSAR_peak_ | 11.75,14       | - |

|      |         |         |            |                |
|------|---------|---------|------------|----------------|
| chr4 | 2329890 | 2329983 | CSAR_peak_ | 34.89,14.76,-  |
| chr4 | 2330060 | 2330096 | CSAR_peak_ | 9.58 -         |
| chr4 | 2331305 | 2331350 | CSAR_peak_ | 12.13 -        |
| chr4 | 2350126 | 2350168 | CSAR_peak_ | 6.21 -         |
| chr4 | 2350503 | 2350643 | CSAR_peak_ | 7.27,10.83 -   |
| chr4 | 2350780 | 2350826 | CSAR_peak_ | 9.58 -         |
| chr4 | 2350853 | 2350944 | CSAR_peak_ | 12.13,7.92 -   |
| chr4 | 2351014 | 2351155 | CSAR_peak_ | 13.66,7.58 -   |
| chr4 | 2394854 | 2394906 | CSAR_peak_ | 20.94 -        |
| chr4 | 2395223 | 2395287 | CSAR_peak_ | 16.11,19.36 -  |
| chr4 | 2395426 | 2395475 | CSAR_peak_ | 9.58 -         |
| chr4 | 2395480 | 2395594 | CSAR_peak_ | 14.76 -        |
| chr4 | 2395752 | 2395792 | CSAR_peak_ | 12.13 -        |
| chr4 | 2396097 | 2396181 | CSAR_peak_ | 7.92,12.13 -   |
| chr4 | 2396375 | 2396432 | CSAR_peak_ | 9.77 -         |
| chr4 | 2396443 | 2396487 | CSAR_peak_ | 7.27 -         |
| chr4 | 2404273 | 2404343 | CSAR_peak_ | 12.13,16.33 -  |
| chr4 | 2405039 | 2405109 | CSAR_peak_ | 7.27 -         |
| chr4 | 2405351 | 2405404 | CSAR_peak_ | 10.02 -        |
| chr4 | 2405425 | 2405515 | CSAR_peak_ | 17.82,12.17 -  |
| chr4 | 2405578 | 2405616 | CSAR_peak_ | 8.39,6.21 -    |
| chr4 | 2406033 | 2406097 | CSAR_peak_ | 7.27 -         |
| chr4 | 2406557 | 2406657 | CSAR_peak_ | 13.48 -        |
| chr4 | 2406817 | 2406886 | CSAR_peak_ | 9.58,7.27 -    |
| chr4 | 2407830 | 2407875 | CSAR_peak_ | 7.27 -         |
| chr4 | 2407997 | 2408049 | CSAR_peak_ | 9.58 -         |
| chr4 | 2408134 | 2408181 | CSAR_peak_ | 8.39 -         |
| chr4 | 2428153 | 2428254 | CSAR_peak_ | 10.83,21.94,-  |
| chr4 | 2428424 | 2428539 | CSAR_peak_ | 31.73,24.21 -  |
| chr4 | 2428553 | 2428613 | CSAR_peak_ | 6.21,9.58 -    |
| chr4 | 2428866 | 2428944 | CSAR_peak_ | 8.61 -         |
| chr4 | 2429038 | 2429091 | CSAR_peak_ | 8.39 -         |
| chr4 | 2492851 | 2492948 | CSAR_peak_ | 6.21,8.14,5.9- |
| chr4 | 2493304 | 2493361 | CSAR_peak_ | 9.58 -         |
| chr4 | 2493558 | 2493611 | CSAR_peak_ | 6.21 -         |
| chr4 | 2493885 | 2494002 | CSAR_peak_ | 16.33 -        |
| chr4 | 2494943 | 2494993 | CSAR_peak_ | 8.39 -         |
| chr4 | 2522374 | 2522420 | CSAR_peak_ | 7.27 -         |
| chr4 | 2522550 | 2522626 | CSAR_peak_ | 13.48 -        |
| chr4 | 2522805 | 2522871 | CSAR_peak_ | 7.27,6.21 -    |
| chr4 | 2523629 | 2523718 | CSAR_peak_ | 7.27,7.27 -    |
| chr4 | 2524614 | 2524652 | CSAR_peak_ | 7.27 -         |

|      |         |         |            |               |   |
|------|---------|---------|------------|---------------|---|
| chr4 | 2586644 | 2586742 | CSAR_peak_ | 10.83         | - |
| chr4 | 2586825 | 2586880 | CSAR_peak_ | 21.2,19.18    | - |
| chr4 | 2586898 | 2586970 | CSAR_peak_ | 17.82,7.27    | - |
| chr4 | 2586974 | 2587161 | CSAR_peak_ | 12.2,25.03,1  | - |
| chr4 | 2587248 | 2587361 | CSAR_peak_ | 17.4,14.88    | - |
| chr4 | 2587454 | 2587487 | CSAR_peak_ | 6.21          | - |
| chr4 | 2587504 | 2587633 | CSAR_peak_ | 18.73,19.36   | - |
| chr4 | 2587794 | 2587924 | CSAR_peak_ | 11.47,26.64   | - |
| chr4 | 2587946 | 2588099 | CSAR_peak_ | 7.27,7.34,7.2 | - |
| chr4 | 2588142 | 2589343 | CSAR_peak_ | 73.29,17.84,  | - |
| chr4 | 2593759 | 2593874 | CSAR_peak_ | 8.33,11.43,1  | - |
| chr4 | 2593887 | 2593957 | CSAR_peak_ | 10.33,7.58    | - |
| chr4 | 2593961 | 2593976 | CSAR_peak_ | 10.95         | - |
| chr4 | 2594015 | 2594118 | CSAR_peak_ | 34.89,33.47   | - |
| chr4 | 2669336 | 2669369 | CSAR_peak_ | 7.58          | - |
| chr4 | 2672034 | 2672097 | CSAR_peak_ | 10.31,7.27    | - |
| chr4 | 2672147 | 2672209 | CSAR_peak_ | 6.1,5.95      | - |
| chr4 | 2672529 | 2672636 | CSAR_peak_ | 9.58,10.83    | - |
| chr4 | 2672919 | 2673050 | CSAR_peak_ | 20.05,10.18   | - |
| chr4 | 2673090 | 2673172 | CSAR_peak_ | 16.33,7.27    | - |
| chr4 | 2680905 | 2680936 | CSAR_peak_ | 7.58          | - |
| chr4 | 2681127 | 2681176 | CSAR_peak_ | 7.27          | - |
| chr4 | 2681255 | 2681302 | CSAR_peak_ | 6.57,6.03     | - |
| chr4 | 2722418 | 2722471 | CSAR_peak_ | 9.77          | - |
| chr4 | 2989984 | 2990206 | CSAR_peak_ | 45.02,14.69,  | - |
| chr4 | 2990324 | 2992557 | CSAR_peak_ | 43.36,9.95,7  | - |
| chr4 | 2992560 | 2992673 | CSAR_peak_ | 52.03,19.68   | - |
| chr4 | 2992684 | 2992761 | CSAR_peak_ | 24.21,31.2    | - |
| chr4 | 2992837 | 2993271 | CSAR_peak_ | 56.17,6.96,6  | - |
| chr4 | 2993369 | 2993498 | CSAR_peak_ | 24.17,24.21   | - |
| chr4 | 2993502 | 2993728 | CSAR_peak_ | 34,8.92,10.5  | - |
| chr4 | 2993798 | 2993909 | CSAR_peak_ | 25.91,28.21   | - |
| chr4 | 2994005 | 2994228 | CSAR_peak_ | 24.11,24.52   | - |
| chr4 | 2994532 | 2994589 | CSAR_peak_ | 10.94,10.18   | - |
| chr4 | 2994707 | 2994757 | CSAR_peak_ | 10.83         | - |
| chr4 | 3061160 | 3061235 | CSAR_peak_ | 5.86,7.27     | - |
| chr4 | 4074094 | 4074215 | CSAR_peak_ | 7.27,13.48    | - |
| chr4 | 4074475 | 4074532 | CSAR_peak_ | 6.57          | - |
| chr4 | 4201336 | 4201401 | CSAR_peak_ | 9.77          | - |
| chr4 | 4201695 | 4201791 | CSAR_peak_ | 14.88         | - |
| chr4 | 4202496 | 4202555 | CSAR_peak_ | 10.02,14.88   | - |
| chr4 | 4202703 | 4202772 | CSAR_peak_ | 9.58          | - |

|      |         |         |             |                |   |
|------|---------|---------|-------------|----------------|---|
| chr4 | 4203720 | 4203757 | CSAR_peak_4 | 5.86           | - |
| chr4 | 4203821 | 4203854 | CSAR_peak_1 | 8.65           | - |
| chr4 | 4203863 | 4203881 | CSAR_peak_1 | 8.39           | - |
| chr4 | 4203960 | 4203996 | CSAR_peak_1 | 8.39           | - |
| chr4 | 4204166 | 4204228 | CSAR_peak_1 | 20.43,25.07    | - |
| chr4 | 4204321 | 4204420 | CSAR_peak_1 | 14.88,19.93    | - |
| chr4 | 4204476 | 4204527 | CSAR_peak_1 | 6.81           | - |
| chr4 | 4204535 | 4204613 | CSAR_peak_1 | 9.03           | - |
| chr4 | 4825319 | 4825369 | CSAR_peak_1 | 6.21           | - |
| chr4 | 4826704 | 4826763 | CSAR_peak_1 | 6.44           | - |
| chr4 | 4827155 | 4827200 | CSAR_peak_4 | 5.86           | - |
| chr4 | 5057452 | 5057503 | CSAR_peak_1 | 9.58           | - |
| chr4 | 5060711 | 5060755 | CSAR_peak_1 | 7.27           | - |
| chr4 | 5061941 | 5062065 | CSAR_peak_1 | 6.21           | - |
| chr4 | 5075592 | 5075652 | CSAR_peak_1 | 8.39           | - |
| chr4 | 5076536 | 5076651 | CSAR_peak_1 | 13.48          | - |
| chr4 | 5077543 | 5077600 | CSAR_peak_4 | 5.86           | - |
| chr4 | 5084038 | 5084200 | CSAR_peak_1 | 12.5,24.21,6.  | - |
| chr4 | 5084334 | 5084374 | CSAR_peak_1 | 7.27           | - |
| chr4 | 5084928 | 5085035 | CSAR_peak_1 | 19.36,13.48    | - |
| chr4 | 5085261 | 5085301 | CSAR_peak_1 | 6.21           | - |
| chr4 | 5085375 | 5085551 | CSAR_peak_1 | 19.36,13.48    | - |
| chr4 | 5085906 | 5085942 | CSAR_peak_1 | 9.58           | - |
| chr4 | 5085945 | 5086017 | CSAR_peak_1 | 7.27,7.27      | - |
| chr4 | 5148133 | 5148151 | CSAR_peak_1 | 6.21           | - |
| chr4 | 5162359 | 5162435 | CSAR_peak_1 | 12.13          | - |
| chr4 | 5163775 | 5163853 | CSAR_peak_1 | 12.13,18.95    | - |
| chr4 | 5164185 | 5164234 | CSAR_peak_1 | 7.27           | - |
| chr4 | 5164749 | 5164794 | CSAR_peak_1 | 7.58           | - |
| chr4 | 5164948 | 5165069 | CSAR_peak_1 | 13.48,7.27     | - |
| chr4 | 5165481 | 5165535 | CSAR_peak_1 | 7.27           | - |
| chr4 | 5165919 | 5165964 | CSAR_peak_1 | 6.21           | - |
| chr4 | 5166004 | 5166100 | CSAR_peak_1 | 6.21,14.88,10. | - |
| chr4 | 5166862 | 5167005 | CSAR_peak_1 | 9.97,14.88     | - |
| chr4 | 5187998 | 5188072 | CSAR_peak_1 | 13.48          | - |
| chr4 | 5249786 | 5249854 | CSAR_peak_1 | 6.21,17.82     | - |
| chr4 | 5249941 | 5249989 | CSAR_peak_1 | 9.58           | - |
| chr4 | 5250104 | 5250148 | CSAR_peak_4 | 5.86           | - |
| chr4 | 5384087 | 5384134 | CSAR_peak_1 | 7.58           | - |
| chr4 | 5384411 | 5384422 | CSAR_peak_1 | 14.76          | - |
| chr4 | 5384659 | 5384719 | CSAR_peak_1 | 6.21,12.13     | - |
| chr4 | 5384820 | 5384893 | CSAR_peak_1 | 6.85,17.51     | - |

|      |         |         |            |               |   |
|------|---------|---------|------------|---------------|---|
| chr4 | 5385061 | 5385115 | CSAR_peak_ | 12.13         | - |
| chr4 | 5385208 | 5385266 | CSAR_peak_ | 17.82,5.86    | - |
| chr4 | 5385417 | 5385465 | CSAR_peak_ | 7.58,8.14,7.7 | - |
| chr4 | 5385650 | 5385709 | CSAR_peak_ | 13.48         | - |
| chr4 | 5386080 | 5386140 | CSAR_peak_ | 14.88         | - |
| chr4 | 5386255 | 5386299 | CSAR_peak_ | 6.21          | - |
| chr4 | 5386572 | 5386637 | CSAR_peak_ | 17.82,14.88   | - |
| chr4 | 5388048 | 5388101 | CSAR_peak_ | 8.39          | - |
| chr4 | 5388316 | 5388382 | CSAR_peak_ | 12.13,9.58    | - |
| chr4 | 5389184 | 5389254 | CSAR_peak_ | 9.77,8.28     | - |
| chr4 | 5389498 | 5389513 | CSAR_peak_ | 14.88         | - |
| chr4 | 5389601 | 5389664 | CSAR_peak_ | 35.7,14.88    | - |
| chr4 | 5389767 | 5389814 | CSAR_peak_ | 8.95,17.82    | - |
| chr4 | 5389946 | 5390011 | CSAR_peak_ | 14.88,16.11   | - |
| chr4 | 5390120 | 5390198 | CSAR_peak_ | 7.27          | - |
| chr4 | 5390331 | 5390394 | CSAR_peak_ | 13.09,10.31   | - |
| chr4 | 5390640 | 5390734 | CSAR_peak_ | 7.27,12.13    | - |
| chr4 | 5403785 | 5403852 | CSAR_peak_ | 7.58          | - |
| chr4 | 5403907 | 5403963 | CSAR_peak_ | 12.13,9.58    | - |
| chr4 | 5403967 | 5404023 | CSAR_peak_ | 7.27          | - |
| chr4 | 5404079 | 5404114 | CSAR_peak_ | 7.27          | - |
| chr4 | 5404291 | 5404478 | CSAR_peak_ | 21.22,18.95   | - |
| chr4 | 5404670 | 5404718 | CSAR_peak_ | 7.26,8.12     | - |
| chr4 | 5404973 | 5405033 | CSAR_peak_ | 7.27,11.38    | - |
| chr4 | 5405131 | 5405197 | CSAR_peak_ | 7.58,8.39,10. | - |
| chr4 | 5405311 | 5405404 | CSAR_peak_ | 8.39,10.83    | - |
| chr4 | 5405457 | 5405464 | CSAR_peak_ | 9.58          | - |
| chr4 | 5405551 | 5405614 | CSAR_peak_ | 9.58,15.28    | - |
| chr4 | 5405747 | 5405793 | CSAR_peak_ | 12.31,6.85    | - |
| chr4 | 5405884 | 5405937 | CSAR_peak_ | 12.13         | - |
| chr4 | 5406005 | 5406093 | CSAR_peak_ | 35.83,14.76   | - |
| chr4 | 5406153 | 5406192 | CSAR_peak_ | 7.27          | - |
| chr4 | 5406506 | 5406618 | CSAR_peak_ | 27.64,31.2    | - |
| chr4 | 5406959 | 5407107 | CSAR_peak_ | 17.82,7.27    | - |
| chr4 | 5637697 | 5637782 | CSAR_peak_ | 10.83,13.48   | - |
| chr4 | 5637842 | 5638004 | CSAR_peak_ | 8.2,8.39      | - |
| chr4 | 5638113 | 5638233 | CSAR_peak_ | 13.48,12.13   | - |
| chr4 | 5647510 | 5647602 | CSAR_peak_ | 17.51,8.14    | - |
| chr4 | 5647716 | 5647871 | CSAR_peak_ | 7.92,8.65     | - |
| chr4 | 5777918 | 5777965 | CSAR_peak_ | 7.58,6.57     | - |
| chr4 | 5796960 | 5797034 | CSAR_peak_ | 7.27          | - |
| chr4 | 6042200 | 6042236 | CSAR_peak_ | 6.21          | - |



|      |         |         |            |                |   |
|------|---------|---------|------------|----------------|---|
| chr4 | 6042333 | 6042374 | CSAR_peak_ | 7.27           | - |
| chr4 | 6043024 | 6043077 | CSAR_peak_ | 12.13,6.21     | - |
| chr4 | 6088131 | 6088212 | CSAR_peak_ | 14.88          | - |
| chr4 | 6088345 | 6088398 | CSAR_peak_ | 9.58,12.13     | - |
| chr4 | 6088438 | 6088604 | CSAR_peak_ | 17.82,13.44    | - |
| chr4 | 6088635 | 6088642 | CSAR_peak_ | 7.27           | - |
| chr4 | 6088734 | 6088770 | CSAR_peak_ | 10.83          | - |
| chr4 | 6088983 | 6089069 | CSAR_peak_ | 12.13,10.94    | - |
| chr4 | 6089233 | 6089331 | CSAR_peak_ | 13.48,16.33    | - |
| chr4 | 6089406 | 6089416 | CSAR_peak_ | 7.27           | - |
| chr4 | 6089647 | 6089785 | CSAR_peak_ | 10.95,11.14    | - |
| chr4 | 6090203 | 6090253 | CSAR_peak_ | 9.58           | - |
| chr4 | 6090442 | 6090487 | CSAR_peak_ | 6.21           | - |
| chr4 | 6090545 | 6090608 | CSAR_peak_ | 6.57           | - |
| chr4 | 6149041 | 6149088 | CSAR_peak_ | 9.58           | - |
| chr4 | 6149147 | 6149270 | CSAR_peak_ | 16.33,11.96    | - |
| chr4 | 6149386 | 6149461 | CSAR_peak_ | 10.83          | - |
| chr4 | 6149727 | 6149933 | CSAR_peak_ | 15.47,17.82,1  | - |
| chr4 | 6149961 | 6150092 | CSAR_peak_ | 25.07,17.88,1  | - |
| chr4 | 6150794 | 6150891 | CSAR_peak_ | 30.35,16.33    | - |
| chr4 | 6150915 | 6151037 | CSAR_peak_ | 9.27,8.39      | - |
| chr4 | 6270666 | 6270714 | CSAR_peak_ | 6.21           | - |
| chr4 | 6270747 | 6270824 | CSAR_peak_ | 12.13          | - |
| chr4 | 6286551 | 6286634 | CSAR_peak_ | 13.48,6.44     | - |
| chr4 | 6296350 | 6296403 | CSAR_peak_ | 14.88          | - |
| chr4 | 6296533 | 6296585 | CSAR_peak_ | 14.88          | - |
| chr4 | 6298328 | 6298341 | CSAR_peak_ | 9.58           | - |
| chr4 | 6298458 | 6298530 | CSAR_peak_ | 10.95,14.88    | - |
| chr4 | 6298594 | 6298645 | CSAR_peak_ | 13.44,8.14     | - |
| chr4 | 6298801 | 6298897 | CSAR_peak_ | 12.13,17.37    | - |
| chr4 | 6298923 | 6299009 | CSAR_peak_ | 12.31          | - |
| chr4 | 6299059 | 6299132 | CSAR_peak_ | 11.99,12.13,1  | - |
| chr4 | 6299149 | 6299299 | CSAR_peak_ | 7.58,6.44      | - |
| chr4 | 6299359 | 6299469 | CSAR_peak_ | 19.36,6.21     | - |
| chr4 | 6300219 | 6300280 | CSAR_peak_ | 19.36,13.44    | - |
| chr4 | 6300581 | 6300688 | CSAR_peak_ | 10.83,8.14,5.  | - |
| chr4 | 6300915 | 6301016 | CSAR_peak_ | 9.58           | - |
| chr4 | 6301060 | 6301130 | CSAR_peak_ | 25.91          | - |
| chr4 | 6301734 | 6301867 | CSAR_peak_ | 20.18,9.41,10. | - |
| chr4 | 6301880 | 6301955 | CSAR_peak_ | 12.13          | - |
| chr4 | 6301968 | 6302314 | CSAR_peak_ | 10.83,33.03,1  | - |
| chr4 | 6302318 | 6302397 | CSAR_peak_ | 13.48,10.83    | - |

|      |         |         |            |             |   |
|------|---------|---------|------------|-------------|---|
| chr4 | 6397558 | 6397631 | CSAR_peak_ | 17.82,7.73  | - |
| chr4 | 6397699 | 6397791 | CSAR_peak_ | 6.21,14.88  | - |
| chr4 | 6397873 | 6397904 | CSAR_peak_ | 9.58        | - |
| chr4 | 6398696 | 6398708 | CSAR_peak_ | 7.27        | - |
| chr4 | 6398783 | 6398834 | CSAR_peak_ | 7.58        | - |
| chr4 | 6399016 | 6399054 | CSAR_peak_ | 6.21        | - |
| chr4 | 6399787 | 6399821 | CSAR_peak_ | 8.39        | - |
| chr4 | 6400567 | 6400624 | CSAR_peak_ | 6.21,7.27   | - |
| chr4 | 6401428 | 6401499 | CSAR_peak_ | 12.13       | - |
| chr4 | 6402249 | 6402328 | CSAR_peak_ | 34.89,7.27  | - |
| chr4 | 6404106 | 6404181 | CSAR_peak_ | 10.83       | - |
| chr4 | 6404187 | 6404246 | CSAR_peak_ | 23.03       | - |
| chr4 | 6455204 | 6455284 | CSAR_peak_ | 12.59       | - |
| chr4 | 6455375 | 6455459 | CSAR_peak_ | 8.14,7.58   | - |
| chr4 | 6525041 | 6525104 | CSAR_peak_ | 6.21        | - |
| chr4 | 6525648 | 6525737 | CSAR_peak_ | 9.58,10.95  | - |
| chr4 | 6525946 | 6526007 | CSAR_peak_ | 7.27        | - |
| chr4 | 6527024 | 6527028 | CSAR_peak_ | 8.95        | - |
| chr4 | 6527171 | 6527235 | CSAR_peak_ | 22.09,11.96 | - |
| chr4 | 6527543 | 6527625 | CSAR_peak_ | 7.27        | - |
| chr4 | 6527922 | 6527990 | CSAR_peak_ | 8.39        | - |
| chr4 | 6539251 | 6539300 | CSAR_peak_ | 6.21        | - |
| chr4 | 6539605 | 6539653 | CSAR_peak_ | 7.27        | - |
| chr4 | 6540883 | 6540969 | CSAR_peak_ | 6.21,6.57   | - |
| chr4 | 6542224 | 6542228 | CSAR_peak_ | 7.27        | - |
| chr4 | 6542373 | 6542437 | CSAR_peak_ | 22.71,12.6  | - |
| chr4 | 6602358 | 6602432 | CSAR_peak_ | 13.48       | - |
| chr4 | 6609733 | 6609808 | CSAR_peak_ | 8.39,7.27   | - |
| chr4 | 6609968 | 6610017 | CSAR_peak_ | 23.49       | - |
| chr4 | 6610109 | 6610177 | CSAR_peak_ | 12.13,7.58  | - |
| chr4 | 6610397 | 6610447 | CSAR_peak_ | 7.27        | - |
| chr4 | 6610613 | 6610651 | CSAR_peak_ | 7.27        | - |
| chr4 | 6610724 | 6610781 | CSAR_peak_ | 6.21,24.21  | - |
| chr4 | 6610973 | 6611068 | CSAR_peak_ | 24.21       | - |
| chr4 | 6611239 | 6611281 | CSAR_peak_ | 8.65        | - |
| chr4 | 6611400 | 6611434 | CSAR_peak_ | 8.39        | - |
| chr4 | 6611476 | 6611546 | CSAR_peak_ | 8.39        | - |
| chr4 | 6611616 | 6611708 | CSAR_peak_ | 12.17       | - |
| chr4 | 6611775 | 6611824 | CSAR_peak_ | 7.27,6.57   | - |
| chr4 | 6612095 | 6612110 | CSAR_peak_ | 6.21        | - |
| chr4 | 6612356 | 6612411 | CSAR_peak_ | 10.31       | - |
| chr4 | 6612659 | 6612670 | CSAR_peak_ | 6.85        | - |

|      |         |         |            |                |   |
|------|---------|---------|------------|----------------|---|
| chr4 | 6613016 | 6613083 | CSAR_peak_ | 8.39           | - |
| chr4 | 6613165 | 6613281 | CSAR_peak_ | 10.83,9.58     | - |
| chr4 | 6613362 | 6613401 | CSAR_peak_ | 8.13           | - |
| chr4 | 6613460 | 6613517 | CSAR_peak_ | 12.13          | - |
| chr4 | 6613599 | 6613617 | CSAR_peak_ | 7.27           | - |
| chr4 | 6614434 | 6614474 | CSAR_peak_ | 8.39           | - |
| chr4 | 6628719 | 6628820 | CSAR_peak_ | 12.31,40.66    | - |
| chr4 | 6629068 | 6629178 | CSAR_peak_ | 13.44          | - |
| chr4 | 6629233 | 6629255 | CSAR_peak_ | 10.83          | - |
| chr4 | 6629350 | 6629402 | CSAR_peak_ | 12.17          | - |
| chr4 | 6630801 | 6630905 | CSAR_peak_ | 10.53,32.83    | - |
| chr4 | 6631551 | 6631580 | CSAR_peak_ | 17.82          | - |
| chr4 | 6631625 | 6631674 | CSAR_peak_ | 7.27           | - |
| chr4 | 6631788 | 6631835 | CSAR_peak_ | 6.21           | - |
| chr4 | 6632041 | 6632117 | CSAR_peak_ | 12.13,8.39     | - |
| chr4 | 6632240 | 6632295 | CSAR_peak_ | 8.39           | - |
| chr4 | 6641411 | 6641476 | CSAR_peak_ | 6.1,6.95,28.3  | - |
| chr4 | 6641691 | 6641862 | CSAR_peak_ | 9.55,17.82     | - |
| chr4 | 6642273 | 6642347 | CSAR_peak_ | 7.27           | - |
| chr4 | 6642732 | 6642760 | CSAR_peak_ | 5.86           | - |
| chr4 | 6645431 | 6645531 | CSAR_peak_ | 20.97,61.26,-  | - |
| chr4 | 6699007 | 6699105 | CSAR_peak_ | 12.13          | - |
| chr4 | 6704186 | 6704242 | CSAR_peak_ | 9.58           | - |
| chr4 | 6705308 | 6705371 | CSAR_peak_ | 12.13          | - |
| chr4 | 6705716 | 6705773 | CSAR_peak_ | 12.31,17.82    | - |
| chr4 | 6707453 | 6707505 | CSAR_peak_ | 12.13,9.58     | - |
| chr4 | 6707690 | 6707802 | CSAR_peak_ | 21.94,6.45     | - |
| chr4 | 6708321 | 6708364 | CSAR_peak_ | 7.27           | - |
| chr4 | 6708532 | 6708600 | CSAR_peak_ | 8.39           | - |
| chr4 | 6708742 | 6708810 | CSAR_peak_ | 14.88          | - |
| chr4 | 6709170 | 6709222 | CSAR_peak_ | 7.58           | - |
| chr4 | 6719772 | 6719814 | CSAR_peak_ | 8.9            | - |
| chr4 | 6719879 | 6719955 | CSAR_peak_ | 8.2,5.86       | - |
| chr4 | 6720102 | 6720150 | CSAR_peak_ | 8.65,7         | - |
| chr4 | 6721492 | 6721579 | CSAR_peak_ | 12.74,10.95,-  | - |
| chr4 | 6721664 | 6721729 | CSAR_peak_ | 13.85,8.2,7.7  | - |
| chr4 | 6721816 | 6721898 | CSAR_peak_ | 14.34,10.33    | - |
| chr4 | 6732982 | 6733095 | CSAR_peak_ | 6.21,13.48,1,- | - |
| chr4 | 6733171 | 6733200 | CSAR_peak_ | 6.21           | - |
| chr4 | 6764866 | 6764978 | CSAR_peak_ | 7.27           | - |
| chr4 | 6764980 | 6765016 | CSAR_peak_ | 6.21           | - |
| chr4 | 6838218 | 6838308 | CSAR_peak_ | 10.95          | - |

|      |         |         |            |               |   |
|------|---------|---------|------------|---------------|---|
| chr4 | 6838443 | 6838495 | CSAR_peak_ | 7.27          | - |
| chr4 | 6839529 | 6839590 | CSAR_peak_ | 7.27          | - |
| chr4 | 6851553 | 6851623 | CSAR_peak_ | 10.62         | - |
| chr4 | 6851725 | 6851797 | CSAR_peak_ | 27.64,6.02,5. | - |
| chr4 | 6852498 | 6852576 | CSAR_peak_ | 10.02,8.65    | - |
| chr4 | 6853181 | 6853233 | CSAR_peak_ | 7.34          | - |
| chr4 | 6947928 | 6947976 | CSAR_peak_ | 6.21          | - |
| chr4 | 6948235 | 6948302 | CSAR_peak_ | 11.03         | - |
| chr4 | 6948451 | 6948498 | CSAR_peak_ | 5.86          | - |
| chr4 | 6948571 | 6948591 | CSAR_peak_ | 5.86          | - |
| chr4 | 6948615 | 6948653 | CSAR_peak_ | 17.51,8.65    | - |
| chr4 | 6948809 | 6948890 | CSAR_peak_ | 14.88,6.21    | - |
| chr4 | 6948979 | 6948998 | CSAR_peak_ | 14.88         | - |
| chr4 | 6949267 | 6949319 | CSAR_peak_ | 5.86          | - |
| chr4 | 6949368 | 6949446 | CSAR_peak_ | 14.76         | - |
| chr4 | 6949551 | 6949604 | CSAR_peak_ | 12.17         | - |
| chr4 | 6949902 | 6949949 | CSAR_peak_ | 10.83         | - |
| chr4 | 6950661 | 6950769 | CSAR_peak_ | 10.83,7.27    | - |
| chr4 | 6951116 | 6951255 | CSAR_peak_ | 7,12.13,12.1  | - |
| chr4 | 6951570 | 6951632 | CSAR_peak_ | 6.21          | - |
| chr4 | 7000196 | 7000250 | CSAR_peak_ | 8.39          | - |
| chr4 | 7000477 | 7000593 | CSAR_peak_ | 9.77,16.33    | - |
| chr4 | 7000669 | 7000729 | CSAR_peak_ | 6.21          | - |
| chr4 | 7000930 | 7001014 | CSAR_peak_ | 23.03,8.13    | - |
| chr4 | 7002024 | 7002072 | CSAR_peak_ | 16.33,8.39    | - |
| chr4 | 7003126 | 7003303 | CSAR_peak_ | 7,5.86        | - |
| chr4 | 7003306 | 7003344 | CSAR_peak_ | 5.86          | - |
| chr4 | 7003346 | 7003395 | CSAR_peak_ | 7.92          | - |
| chr4 | 7009168 | 7009218 | CSAR_peak_ | 7.27          | - |
| chr4 | 7009394 | 7009446 | CSAR_peak_ | 13.48,12.17   | - |
| chr4 | 7009499 | 7009546 | CSAR_peak_ | 9.58          | - |
| chr4 | 7009608 | 7009689 | CSAR_peak_ | 23.03,15.2    | - |
| chr4 | 7009766 | 7009825 | CSAR_peak_ | 12.13         | - |
| chr4 | 7009859 | 7009901 | CSAR_peak_ | 13.44         | - |
| chr4 | 7009904 | 7010149 | CSAR_peak_ | 29.4,11.03,1! | - |
| chr4 | 7010154 | 7011049 | CSAR_peak_ | 20.13,38.71,( | - |
| chr4 | 7011055 | 7011249 | CSAR_peak_ | 12.31,50.92   | - |
| chr4 | 7044396 | 7044446 | CSAR_peak_ | 9.58          | - |
| chr4 | 7045360 | 7045449 | CSAR_peak_ | 13.48         | - |
| chr4 | 7045541 | 7045590 | CSAR_peak_ | 7.27          | - |
| chr4 | 7045712 | 7045766 | CSAR_peak_ | 9.58          | - |
| chr4 | 7046268 | 7046358 | CSAR_peak_ | 10.83,13.48   | - |

|      |         |         |            |                |   |
|------|---------|---------|------------|----------------|---|
| chr4 | 7046464 | 7046532 | CSAR_peak_ | 9.58,8.39      | - |
| chr4 | 7047504 | 7047551 | CSAR_peak_ | 12.13          | - |
| chr4 | 7047883 | 7047928 | CSAR_peak_ | 9.58           | - |
| chr4 | 7047958 | 7048026 | CSAR_peak_ | 6.21           | - |
| chr4 | 7048098 | 7048127 | CSAR_peak_ | 6.21           | - |
| chr4 | 7049112 | 7049166 | CSAR_peak_ | 12.13,9.58     | - |
| chr4 | 7050128 | 7050177 | CSAR_peak_ | 7.27           | - |
| chr4 | 7050461 | 7050504 | CSAR_peak_ | 10.83          | - |
| chr4 | 7050605 | 7050684 | CSAR_peak_ | 19.36,23.49    | - |
| chr4 | 7054024 | 7054084 | CSAR_peak_ | 6.21,6.57      | - |
| chr4 | 7093692 | 7093736 | CSAR_peak_ | 7.27           | - |
| chr4 | 7093812 | 7093876 | CSAR_peak_ | 14.88,6.21     | - |
| chr4 | 7095599 | 7095712 | CSAR_peak_ | 7.27,14.88     | - |
| chr4 | 7096329 | 7096418 | CSAR_peak_ | 7.27,7.27      | - |
| chr4 | 7096755 | 7096809 | CSAR_peak_ | 17.82          | - |
| chr4 | 7109287 | 7109319 | CSAR_peak_ | 10.02          | - |
| chr4 | 7109411 | 7109450 | CSAR_peak_ | 6.03,11.38     | - |
| chr4 | 7110752 | 7110808 | CSAR_peak_ | 7.58           | - |
| chr4 | 7116149 | 7116250 | CSAR_peak_ | 18.49          | - |
| chr4 | 7116408 | 7116504 | CSAR_peak_ | 8.39           | - |
| chr4 | 7116569 | 7116613 | CSAR_peak_ | 16.11          | - |
| chr4 | 7116691 | 7116743 | CSAR_peak_ | 25.91,11.63    | - |
| chr4 | 7117104 | 7117116 | CSAR_peak_ | 9.58,6.95      | - |
| chr4 | 7117196 | 7117243 | CSAR_peak_ | 14.88,14.88    | - |
| chr4 | 7117337 | 7117344 | CSAR_peak_ | 10.83          | - |
| chr4 | 7117417 | 7117450 | CSAR_peak_ | 14.88          | - |
| chr4 | 7117692 | 7117825 | CSAR_peak_ | 28.21,9.58,6.- | - |
| chr4 | 7117914 | 7117969 | CSAR_peak_ | 28.62,9.58     | - |
| chr4 | 7117997 | 7118099 | CSAR_peak_ | 11.45,9.94     | - |
| chr4 | 7118212 | 7118250 | CSAR_peak_ | 7.58           | - |
| chr4 | 7118285 | 7118332 | CSAR_peak_ | 6.1,29.4       | - |
| chr4 | 7118727 | 7118848 | CSAR_peak_ | 29.2,7.34,21.- | - |
| chr4 | 7118953 | 7119010 | CSAR_peak_ | 9.58,25.07     | - |
| chr4 | 7119056 | 7119141 | CSAR_peak_ | 9.58           | - |
| chr4 | 7119144 | 7119245 | CSAR_peak_ | 8.39           | - |
| chr4 | 7119439 | 7119507 | CSAR_peak_ | 8.95,10.31     | - |
| chr4 | 7119578 | 7119664 | CSAR_peak_ | 16.11,16.11    | - |
| chr4 | 7120022 | 7120061 | CSAR_peak_ | 6.21           | - |
| chr4 | 7120169 | 7120254 | CSAR_peak_ | 8.13,7.92      | - |
| chr4 | 7120367 | 7120477 | CSAR_peak_ | 20.43,14.88,-  | - |
| chr4 | 7120943 | 7120975 | CSAR_peak_ | 12.13,10.95    | - |
| chr4 | 7121016 | 7121214 | CSAR_peak_ | 28.94,19.98,-  | - |

|      |         |         |            |               |   |
|------|---------|---------|------------|---------------|---|
| chr4 | 7122342 | 7122417 | CSAR_peak_ | 17.68         | - |
| chr4 | 7122607 | 7122671 | CSAR_peak_ | 8.39          | - |
| chr4 | 7122728 | 7122772 | CSAR_peak_ | 7.58,12.13    | - |
| chr4 | 7122859 | 7122908 | CSAR_peak_ | 9.58,7.34     | - |
| chr4 | 7124163 | 7124281 | CSAR_peak_ | 11.45,9.94    | - |
| chr4 | 7126855 | 7126961 | CSAR_peak_ | 18.73,8.65    | - |
| chr4 | 7127051 | 7127105 | CSAR_peak_ | 14.88,13.51   | - |
| chr4 | 7129505 | 7129597 | CSAR_peak_ | 12.13         | - |
| chr4 | 7130059 | 7130124 | CSAR_peak_ | 14.88         | - |
| chr4 | 7130459 | 7130483 | CSAR_peak_ | 12.13,6.95    | - |
| chr4 | 7130541 | 7130608 | CSAR_peak_ | 24.21,14.88   | - |
| chr4 | 7131398 | 7131465 | CSAR_peak_ | 14.88         | - |
| chr4 | 7134737 | 7134789 | CSAR_peak_ | 9.58          | - |
| chr4 | 7135100 | 7135180 | CSAR_peak_ | 7.27          | - |
| chr4 | 7135519 | 7135593 | CSAR_peak_ | 7.27          | - |
| chr4 | 7162137 | 7162193 | CSAR_peak_ | 9.58          | - |
| chr4 | 7176944 | 7177002 | CSAR_peak_ | 14.76         | - |
| chr4 | 7193669 | 7193708 | CSAR_peak_ | 7.27          | - |
| chr4 | 7193810 | 7193891 | CSAR_peak_ | 9.77          | - |
| chr4 | 7257015 | 7257093 | CSAR_peak_ | 5.86          | - |
| chr4 | 7257771 | 7257827 | CSAR_peak_ | 16.11         | - |
| chr4 | 7257948 | 7258024 | CSAR_peak_ | 6.21,9.58     | - |
| chr4 | 7259829 | 7259896 | CSAR_peak_ | 12.17         | - |
| chr4 | 7308528 | 7308603 | CSAR_peak_ | 9.58          | - |
| chr4 | 7314690 | 7314734 | CSAR_peak_ | 6.21          | - |
| chr4 | 7314990 | 7315063 | CSAR_peak_ | 8.14,6.21,8.3 | - |
| chr4 | 7315440 | 7315469 | CSAR_peak_ | 6.95          | - |
| chr4 | 7315522 | 7315577 | CSAR_peak_ | 9.55          | - |
| chr4 | 7315715 | 7315852 | CSAR_peak_ | 6.81,12.17,1  | - |
| chr4 | 7316078 | 7316106 | CSAR_peak_ | 7.27          | - |
| chr4 | 7349992 | 7350041 | CSAR_peak_ | 6.95          | - |
| chr4 | 7350128 | 7350266 | CSAR_peak_ | 25.62,7.27    | - |
| chr4 | 7350411 | 7350461 | CSAR_peak_ | 6.44,10.33    | - |
| chr4 | 7350487 | 7350541 | CSAR_peak_ | 17.82,9.58,8. | - |
| chr4 | 7350570 | 7350689 | CSAR_peak_ | 25.91         | - |
| chr4 | 7350780 | 7350875 | CSAR_peak_ | 14.88,16.87   | - |
| chr4 | 7351027 | 7351085 | CSAR_peak_ | 8.28,9.58     | - |
| chr4 | 7351127 | 7351224 | CSAR_peak_ | 9.58          | - |
| chr4 | 7351310 | 7351384 | CSAR_peak_ | 12.13         | - |
| chr4 | 7351497 | 7351605 | CSAR_peak_ | 12.13,20.94   | - |
| chr4 | 7351690 | 7351727 | CSAR_peak_ | 12.31,6.03    | - |
| chr4 | 7351909 | 7351961 | CSAR_peak_ | 7.27,10.83    | - |

|      |         |         |            |                |   |
|------|---------|---------|------------|----------------|---|
| chr4 | 7352068 | 7352109 | CSAR_peak_ | 7.27           | - |
| chr4 | 7401448 | 7401525 | CSAR_peak_ | 7.27,8.39      | - |
| chr4 | 7401626 | 7401684 | CSAR_peak_ | 7.27           | - |
| chr4 | 7401851 | 7401893 | CSAR_peak_ | 10.83          | - |
| chr4 | 7451356 | 7451410 | CSAR_peak_ | 7.27           | - |
| chr4 | 7451639 | 7451686 | CSAR_peak_ | 7.27           | - |
| chr4 | 7469043 | 7469111 | CSAR_peak_ | 11.38          | - |
| chr4 | 7469131 | 7469248 | CSAR_peak_ | 17.82,8.39     | - |
| chr4 | 7470096 | 7470178 | CSAR_peak_ | 7.27           | - |
| chr4 | 7491580 | 7491621 | CSAR_peak_ | 6.21           | - |
| chr4 | 7491734 | 7491787 | CSAR_peak_ | 7.27,8.39      | - |
| chr4 | 7491883 | 7491946 | CSAR_peak_ | 12.31,7.47     | - |
| chr4 | 7517573 | 7517639 | CSAR_peak_ | 10.83          | - |
| chr4 | 7517642 | 7517696 | CSAR_peak_ | 9.58           | - |
| chr4 | 7517780 | 7517822 | CSAR_peak_ | 10.83          | - |
| chr4 | 7518038 | 7518107 | CSAR_peak_ | 8.95,10.83     | - |
| chr4 | 7518248 | 7518401 | CSAR_peak_ | 18.73,11.38,;- | - |
| chr4 | 7518464 | 7518559 | CSAR_peak_ | 6.81,16.33,9.- | - |
| chr4 | 7518643 | 7518752 | CSAR_peak_ | 16.33          | - |
| chr4 | 7518848 | 7518891 | CSAR_peak_ | 7.27           | - |
| chr4 | 7518975 | 7519026 | CSAR_peak_ | 6.21           | - |
| chr4 | 7561771 | 7561831 | CSAR_peak_ | 8.39           | - |
| chr4 | 7590248 | 7590298 | CSAR_peak_ | 6.03           | - |
| chr4 | 7590545 | 7590623 | CSAR_peak_ | 7.27,10.31     | - |
| chr4 | 7595542 | 7595593 | CSAR_peak_ | 12.13          | - |
| chr4 | 7655188 | 7655229 | CSAR_peak_ | 7.27           | - |
| chr4 | 7684506 | 7684554 | CSAR_peak_ | 9.43,6.45      | - |
| chr4 | 7684566 | 7684639 | CSAR_peak_ | 16.33,24.21    | - |
| chr4 | 7684700 | 7684766 | CSAR_peak_ | 12.27,11.28    | - |
| chr4 | 7684790 | 7684888 | CSAR_peak_ | 16.36,12.13    | - |
| chr4 | 7684898 | 7685015 | CSAR_peak_ | 13.48,6.21,1(- | - |
| chr4 | 7685206 | 7685248 | CSAR_peak_ | 10.83          | - |
| chr4 | 7685266 | 7685317 | CSAR_peak_ | 13.51,12.31    | - |
| chr4 | 7685383 | 7685471 | CSAR_peak_ | 8.14,9.58,12.- | - |
| chr4 | 7685550 | 7685746 | CSAR_peak_ | 13.41,18.73    | - |
| chr4 | 7685879 | 7685932 | CSAR_peak_ | 6.1            | - |
| chr4 | 7686008 | 7686093 | CSAR_peak_ | 12.6,8.44      | - |
| chr4 | 7686095 | 7686212 | CSAR_peak_ | 9.25,8.14      | - |
| chr4 | 7686230 | 7686337 | CSAR_peak_ | 20.43,38.71    | - |
| chr4 | 7686410 | 7686625 | CSAR_peak_ | 16.33,12.13,;- | - |
| chr4 | 7733599 | 7733666 | CSAR_peak_ | 9.58,8.39      | - |
| chr4 | 7733942 | 7733995 | CSAR_peak_ | 6.21           | - |

|      |         |         |            |                  |   |
|------|---------|---------|------------|------------------|---|
| chr4 | 7734692 | 7734748 | CSAR_peak_ | 7.27             | - |
| chr4 | 7734812 | 7734960 | CSAR_peak_ | 10.83,18.73      | - |
| chr4 | 7745253 | 7745316 | CSAR_peak_ | 7.58,14.88       | - |
| chr4 | 7770081 | 7770181 | CSAR_peak_ | 7.27,17.82       | - |
| chr4 | 7770199 | 7770295 | CSAR_peak_ | 8.39,10.83       | - |
| chr4 | 7770876 | 7770990 | CSAR_peak_ | 13.48,25.91      | - |
| chr4 | 7771030 | 7771069 | CSAR_peak_ | 7.27             | - |
| chr4 | 7771144 | 7771243 | CSAR_peak_ | 9.58,7.27        | - |
| chr4 | 7771299 | 7771361 | CSAR_peak_ | 12.13            | - |
| chr4 | 7771419 | 7771483 | CSAR_peak_ | 10.02            | - |
| chr4 | 7771509 | 7771600 | CSAR_peak_ | 18.95,12.13      | - |
| chr4 | 7771638 | 7771763 | CSAR_peak_ | 25.1,21.94       | - |
| chr4 | 7771877 | 7772064 | CSAR_peak_ | 25.91,24.21      | - |
| chr4 | 7772086 | 7772196 | CSAR_peak_ | 10.83,7.27       | - |
| chr4 | 7772362 | 7772435 | CSAR_peak_ | 14.92            | - |
| chr4 | 7772503 | 7772699 | CSAR_peak_ | 19.96,16.22      | - |
| chr4 | 7772750 | 7772835 | CSAR_peak_ | 17.35            | - |
| chr4 | 7772882 | 7773014 | CSAR_peak_ | 6.81,19.36,19.36 | - |
| chr4 | 7773068 | 7773136 | CSAR_peak_ | 24.97,31.19      | - |
| chr4 | 7773223 | 7773283 | CSAR_peak_ | 20.44,28.12      | - |
| chr4 | 7773295 | 7773359 | CSAR_peak_ | 24.21,13.44      | - |
| chr4 | 7773567 | 7773639 | CSAR_peak_ | 34.31,25.22      | - |
| chr4 | 7785510 | 7785655 | CSAR_peak_ | 7.27,19.96,9.58  | - |
| chr4 | 7785806 | 7785882 | CSAR_peak_ | 14.88,7.58       | - |
| chr4 | 7785930 | 7785994 | CSAR_peak_ | 9.58,8.39        | - |
| chr4 | 7789786 | 7789848 | CSAR_peak_ | 33.03,11.14      | - |
| chr4 | 7790089 | 7790106 | CSAR_peak_ | 9.58             | - |
| chr4 | 7790926 | 7790980 | CSAR_peak_ | 12.13,6.85       | - |
| chr4 | 7801409 | 7801470 | CSAR_peak_ | 12.13            | - |
| chr4 | 7802103 | 7802174 | CSAR_peak_ | 14.88            | - |
| chr4 | 7804562 | 7804593 | CSAR_peak_ | 7.68             | - |
| chr4 | 7805149 | 7805200 | CSAR_peak_ | 10.53,7.26       | - |
| chr4 | 7805641 | 7805691 | CSAR_peak_ | 13.48,17.4       | - |
| chr4 | 7805786 | 7805816 | CSAR_peak_ | 19.36            | - |
| chr4 | 7805834 | 7805899 | CSAR_peak_ | 16.36,12.68      | - |
| chr4 | 7806006 | 7806084 | CSAR_peak_ | 17.68,11.38      | - |
| chr4 | 7806328 | 7806382 | CSAR_peak_ | 12.17            | - |
| chr4 | 7806567 | 7806585 | CSAR_peak_ | 6.21,7           | - |
| chr4 | 7806603 | 7806664 | CSAR_peak_ | 14.25            | - |
| chr4 | 7806779 | 7806872 | CSAR_peak_ | 8.13,7.27        | - |
| chr4 | 7806881 | 7806936 | CSAR_peak_ | 6.21             | - |
| chr4 | 7807001 | 7807038 | CSAR_peak_ | 6.57             | - |



|      |         |         |            |                |   |
|------|---------|---------|------------|----------------|---|
| chr4 | 7807291 | 7807358 | CSAR_peak_ | 8.39,6.21      | - |
| chr4 | 7825536 | 7825579 | CSAR_peak_ | 7.27           | - |
| chr4 | 7871083 | 7871162 | CSAR_peak_ | 7.27           | - |
| chr4 | 7872172 | 7872252 | CSAR_peak_ | 8.65,8.2       | - |
| chr4 | 7873813 | 7873867 | CSAR_peak_ | 10.83          | - |
| chr4 | 7874456 | 7874507 | CSAR_peak_ | 9.58           | - |
| chr4 | 7874583 | 7874652 | CSAR_peak_ | 8.39,6.21      | - |
| chr4 | 7875661 | 7875708 | CSAR_peak_ | 7.58           | - |
| chr4 | 7876141 | 7876205 | CSAR_peak_ | 6.57           | - |
| chr4 | 7881891 | 7881944 | CSAR_peak_ | 6.21           | - |
| chr4 | 7882254 | 7882304 | CSAR_peak_ | 5.86           | - |
| chr4 | 7882756 | 7882815 | CSAR_peak_ | 5.86           | - |
| chr4 | 7882938 | 7882999 | CSAR_peak_ | 12.23,16.78    | - |
| chr4 | 7883247 | 7883331 | CSAR_peak_ | 10.82,5.86     | - |
| chr4 | 7883585 | 7883638 | CSAR_peak_ | 8.14           | - |
| chr4 | 7884041 | 7884091 | CSAR_peak_ | 5.86           | - |
| chr4 | 7884372 | 7884431 | CSAR_peak_ | 17.65,8.39     | - |
| chr4 | 7884646 | 7884698 | CSAR_peak_ | 9.58           | - |
| chr4 | 7885086 | 7885161 | CSAR_peak_ | 23.21,20.43    | - |
| chr4 | 7885274 | 7885324 | CSAR_peak_ | 9.48,6.81      | - |
| chr4 | 7885379 | 7885519 | CSAR_peak_ | 38.71,14.88,-  | - |
| chr4 | 7885662 | 7885699 | CSAR_peak_ | 6.95           | - |
| chr4 | 7885855 | 7885981 | CSAR_peak_ | 14.88,24.21    | - |
| chr4 | 7887302 | 7887336 | CSAR_peak_ | 5.86           | - |
| chr4 | 7887339 | 7887384 | CSAR_peak_ | 10.83          | - |
| chr4 | 7887428 | 7887617 | CSAR_peak_ | 8.14,28.62,6.- | - |
| chr4 | 7888656 | 7888703 | CSAR_peak_ | 7.27           | - |
| chr4 | 7889833 | 7889986 | CSAR_peak_ | 21.94,16.33    | - |
| chr4 | 7890927 | 7890993 | CSAR_peak_ | 7.27           | - |
| chr4 | 7891255 | 7891296 | CSAR_peak_ | 10.83          | - |
| chr4 | 7891381 | 7891429 | CSAR_peak_ | 7.27           | - |
| chr4 | 7891910 | 7891984 | CSAR_peak_ | 7.27,6.21      | - |
| chr4 | 7892484 | 7892563 | CSAR_peak_ | 9.58           | - |
| chr4 | 7892949 | 7892974 | CSAR_peak_ | 10.83          | - |
| chr4 | 7893069 | 7893149 | CSAR_peak_ | 8.39,5.95      | - |
| chr4 | 7893150 | 7893190 | CSAR_peak_ | 7.27           | - |
| chr4 | 7893299 | 7893325 | CSAR_peak_ | 12.13          | - |
| chr4 | 7893403 | 7893477 | CSAR_peak_ | 7.27           | - |
| chr4 | 7893559 | 7893680 | CSAR_peak_ | 14.88,7.92,6.- | - |
| chr4 | 7935257 | 7935309 | CSAR_peak_ | 8.39,7.58      | - |
| chr4 | 7936856 | 7936918 | CSAR_peak_ | 12.13,6.21     | - |
| chr4 | 7936936 | 7936991 | CSAR_peak_ | 8.39,14.88     | - |

|      |         |         |            |                |   |
|------|---------|---------|------------|----------------|---|
| chr4 | 7937212 | 7937245 | CSAR_peak_ | 7.27           | - |
| chr4 | 7937247 | 7937278 | CSAR_peak_ | 12.13,12.17    | - |
| chr4 | 7937483 | 7937562 | CSAR_peak_ | 19.36,48.73    | - |
| chr4 | 7937620 | 7937670 | CSAR_peak_ | 42.64,6.21     | - |
| chr4 | 7938314 | 7938390 | CSAR_peak_ | 19.36,27.64    | - |
| chr4 | 7938414 | 7938504 | CSAR_peak_ | 14.88,7.27     | - |
| chr4 | 7990853 | 7990909 | CSAR_peak_ | 7.92           | - |
| chr4 | 7990962 | 7991010 | CSAR_peak_ | 16.19          | - |
| chr4 | 7991014 | 7991070 | CSAR_peak_ | 10.83,9.58     | - |
| chr4 | 7991683 | 7991741 | CSAR_peak_ | 8.52           | - |
| chr4 | 7991788 | 7991851 | CSAR_peak_ | 12.31,6.57     | - |
| chr4 | 7993934 | 7994036 | CSAR_peak_ | 10.83,8.39     | - |
| chr4 | 7994236 | 7994330 | CSAR_peak_ | 7.27,6.21      | - |
| chr4 | 7994414 | 7994428 | CSAR_peak_ | 9.77           | - |
| chr4 | 7995676 | 7995783 | CSAR_peak_ | 6.03,7.27      | - |
| chr4 | 7995903 | 7995968 | CSAR_peak_ | 12.13          | - |
| chr4 | 7997870 | 7997956 | CSAR_peak_ | 17.82          | - |
| chr4 | 8022514 | 8022558 | CSAR_peak_ | 7.27           | - |
| chr4 | 8028185 | 8028237 | CSAR_peak_ | 7.27           | - |
| chr4 | 8045710 | 8045759 | CSAR_peak_ | 9.58           | - |
| chr4 | 8048191 | 8048266 | CSAR_peak_ | 18.73          | - |
| chr4 | 8048351 | 8048370 | CSAR_peak_ | 10.83          | - |
| chr4 | 8070668 | 8070784 | CSAR_peak_ | 7.27,6.21      | - |
| chr4 | 8077507 | 8077550 | CSAR_peak_ | 7.27           | - |
| chr4 | 8098274 | 8098435 | CSAR_peak_ | 19.36,6.21,7.- | - |
| chr4 | 8098506 | 8098516 | CSAR_peak_ | 7.58           | - |
| chr4 | 8098548 | 8098594 | CSAR_peak_ | 13.66          | - |
| chr4 | 8098606 | 8098680 | CSAR_peak_ | 10.31,12.13    | - |
| chr4 | 8098847 | 8098961 | CSAR_peak_ | 26.69,13.51,-  | - |
| chr4 | 8099069 | 8099122 | CSAR_peak_ | 6.21,12.13     | - |
| chr4 | 8099199 | 8099297 | CSAR_peak_ | 7.27,12.13     | - |
| chr4 | 8099486 | 8099600 | CSAR_peak_ | 7.73,7.92      | - |
| chr4 | 8099845 | 8099918 | CSAR_peak_ | 12.31,19.96    | - |
| chr4 | 8100012 | 8100063 | CSAR_peak_ | 6.03           | - |
| chr4 | 8100083 | 8100143 | CSAR_peak_ | 12.13,6.85     | - |
| chr4 | 8100621 | 8100743 | CSAR_peak_ | 19.36,8.65     | - |
| chr4 | 8100843 | 8100982 | CSAR_peak_ | 12.13,9.58     | - |
| chr4 | 8101067 | 8101120 | CSAR_peak_ | 17.82,6.21     | - |
| chr4 | 8101271 | 8101333 | CSAR_peak_ | 8.39           | - |
| chr4 | 8101415 | 8101502 | CSAR_peak_ | 13.48,24.21    | - |
| chr4 | 8101627 | 8101683 | CSAR_peak_ | 17.82          | - |
| chr4 | 8101914 | 8101953 | CSAR_peak_ | 7.27           | - |

|      |         |         |            |                |   |
|------|---------|---------|------------|----------------|---|
| chr4 | 8101976 | 8102018 | CSAR_peak_ | 7.27           | - |
| chr4 | 8102290 | 8102434 | CSAR_peak_ | 13.09,17.82,(  | - |
| chr4 | 8102765 | 8102862 | CSAR_peak_ | 7.27,7.27      | - |
| chr4 | 8112657 | 8112732 | CSAR_peak_ | 12.13,6.21     | - |
| chr4 | 8113841 | 8113861 | CSAR_peak_ | 7.27           | - |
| chr4 | 8113943 | 8113984 | CSAR_peak_ | 8.39           | - |
| chr4 | 8114999 | 8115039 | CSAR_peak_ | 9.58           | - |
| chr4 | 8115186 | 8115240 | CSAR_peak_ | 12.13,6.03     | - |
| chr4 | 8116584 | 8116633 | CSAR_peak_ | 8.39           | - |
| chr4 | 8152666 | 8152780 | CSAR_peak_ | 6.21,7.27      | - |
| chr4 | 8194602 | 8194633 | CSAR_peak_ | 5.86           | - |
| chr4 | 8200955 | 8201005 | CSAR_peak_ | 7.27           | - |
| chr4 | 8201102 | 8201236 | CSAR_peak_ | 12.31,17.82,(  | - |
| chr4 | 8201307 | 8201398 | CSAR_peak_ | 9.58           | - |
| chr4 | 8201607 | 8201665 | CSAR_peak_ | 9.58           | - |
| chr4 | 8202061 | 8202221 | CSAR_peak_ | 15.2,22.58     | - |
| chr4 | 8203099 | 8203181 | CSAR_peak_ | 8.28,8.39      | - |
| chr4 | 8205046 | 8205096 | CSAR_peak_ | 7.27           | - |
| chr4 | 8243062 | 8243162 | CSAR_peak_ | 14.88,20.43    | - |
| chr4 | 8243429 | 8243492 | CSAR_peak_ | 17.82,6.21     | - |
| chr4 | 8249668 | 8249762 | CSAR_peak_ | 9.27,14.88     | - |
| chr4 | 8249914 | 8249954 | CSAR_peak_ | 7.27           | - |
| chr4 | 8250215 | 8250277 | CSAR_peak_ | 5.86,12.13     | - |
| chr4 | 8251434 | 8251475 | CSAR_peak_ | 13.48          | - |
| chr4 | 8256398 | 8256511 | CSAR_peak_ | 17.82,6.21     | - |
| chr4 | 8256822 | 8256875 | CSAR_peak_ | 19.36,8.28     | - |
| chr4 | 8257434 | 8257445 | CSAR_peak_ | 6.21           | - |
| chr4 | 8257600 | 8257673 | CSAR_peak_ | 16.08,13.44    | - |
| chr4 | 8257713 | 8257730 | CSAR_peak_ | 11.66,6.1      | - |
| chr4 | 8257825 | 8257957 | CSAR_peak_ | 19.96,8.19,7.- | - |
| chr4 | 8258114 | 8258160 | CSAR_peak_ | 12.13          | - |
| chr4 | 8258164 | 8258232 | CSAR_peak_ | 20.94          | - |
| chr4 | 8258285 | 8258365 | CSAR_peak_ | 8.39,9.58      | - |
| chr4 | 8258518 | 8258643 | CSAR_peak_ | 9.58,14.88     | - |
| chr4 | 8259013 | 8259070 | CSAR_peak_ | 7.73,8.9       | - |
| chr4 | 8259137 | 8259199 | CSAR_peak_ | 16.11,9.61     | - |
| chr4 | 8259404 | 8259561 | CSAR_peak_ | 6.03,10.31,6.- | - |
| chr4 | 8259765 | 8259923 | CSAR_peak_ | 12.13,17.82    | - |
| chr4 | 8259929 | 8260085 | CSAR_peak_ | 12.13,6.21,1(- | - |
| chr4 | 8260630 | 8260675 | CSAR_peak_ | 10.83          | - |
| chr4 | 8267554 | 8267606 | CSAR_peak_ | 6.21           | - |
| chr4 | 8267669 | 8267707 | CSAR_peak_ | 7.58           | - |

|      |         |         |            |                |   |
|------|---------|---------|------------|----------------|---|
| chr4 | 8267867 | 8267933 | CSAR_peak_ | 9.58           | - |
| chr4 | 8267935 | 8267985 | CSAR_peak_ | 9.58,8.95      | - |
| chr4 | 8268034 | 8268084 | CSAR_peak_ | 7.27           | - |
| chr4 | 8268091 | 8268188 | CSAR_peak_ | 7.58,8.39      | - |
| chr4 | 8268300 | 8268496 | CSAR_peak_ | 12.17,10.83,   | - |
| chr4 | 8268589 | 8268638 | CSAR_peak_ | 22.58,25.12    | - |
| chr4 | 8269520 | 8269575 | CSAR_peak_ | 9.58           | - |
| chr4 | 8281993 | 8282122 | CSAR_peak_ | 6.81           | - |
| chr4 | 8282667 | 8282746 | CSAR_peak_ | 14.88          | - |
| chr4 | 8282930 | 8282968 | CSAR_peak_ | 9.58           | - |
| chr4 | 8283014 | 8283116 | CSAR_peak_ | 7.27           | - |
| chr4 | 8283232 | 8283276 | CSAR_peak_ | 6.21           | - |
| chr4 | 8287379 | 8287458 | CSAR_peak_ | 9.55,5.86      | - |
| chr4 | 8302190 | 8302240 | CSAR_peak_ | 9.77           | - |
| chr4 | 8338375 | 8338415 | CSAR_peak_ | 9.58           | - |
| chr4 | 8339372 | 8339411 | CSAR_peak_ | 7.27           | - |
| chr4 | 8349060 | 8349096 | CSAR_peak_ | 6.21           | - |
| chr4 | 8413512 | 8413611 | CSAR_peak_ | 17.37,9.41     | - |
| chr4 | 8413675 | 8413714 | CSAR_peak_ | 9.58,14.88     | - |
| chr4 | 8413867 | 8413911 | CSAR_peak_ | 10.83          | - |
| chr4 | 8414624 | 8414677 | CSAR_peak_ | 6.81           | - |
| chr4 | 8424895 | 8424950 | CSAR_peak_ | 8.39           | - |
| chr4 | 8425228 | 8425277 | CSAR_peak_ | 7.27,9.58      | - |
| chr4 | 8425316 | 8425337 | CSAR_peak_ | 6.02           | - |
| chr4 | 8425447 | 8425487 | CSAR_peak_ | 10.83          | - |
| chr4 | 8425742 | 8425807 | CSAR_peak_ | 8.39           | - |
| chr4 | 8425937 | 8425953 | CSAR_peak_ | 7.27           | - |
| chr4 | 8425967 | 8426037 | CSAR_peak_ | 12.59          | - |
| chr4 | 8426343 | 8426403 | CSAR_peak_ | 15.9           | - |
| chr4 | 8430998 | 8431122 | CSAR_peak_ | 9.77,7.27      | - |
| chr4 | 8431252 | 8431341 | CSAR_peak_ | 8.39           | - |
| chr4 | 8431421 | 8431467 | CSAR_peak_ | 8.65           | - |
| chr4 | 8431520 | 8431533 | CSAR_peak_ | 6.81           | - |
| chr4 | 8431850 | 8431918 | CSAR_peak_ | 9.77,21.78     | - |
| chr4 | 8451762 | 8451874 | CSAR_peak_ | 7.27           | - |
| chr4 | 8451910 | 8451938 | CSAR_peak_ | 7.27           | - |
| chr4 | 8451959 | 8451992 | CSAR_peak_ | 6.21           | - |
| chr4 | 8461173 | 8461294 | CSAR_peak_ | 7.27,9.58,7.7- | - |
| chr4 | 8461297 | 8461352 | CSAR_peak_ | 12.13          | - |
| chr4 | 8461565 | 8461603 | CSAR_peak_ | 6.21           | - |
| chr4 | 8462903 | 8463015 | CSAR_peak_ | 12.17,14       | - |
| chr4 | 8463058 | 8463144 | CSAR_peak_ | 17.51,6.85,6.- | - |

|      |         |         |            |               |   |
|------|---------|---------|------------|---------------|---|
| chr4 | 8463149 | 8463187 | CSAR_peak_ | 8.28          | - |
| chr4 | 8463701 | 8463732 | CSAR_peak_ | 8.39          | - |
| chr4 | 8516564 | 8516633 | CSAR_peak_ | 6.54          | - |
| chr4 | 8517000 | 8517089 | CSAR_peak_ | 9.77,13.6     | - |
| chr4 | 8517636 | 8517725 | CSAR_peak_ | 19.93,16.19   | - |
| chr4 | 8517757 | 8517808 | CSAR_peak_ | 14.88         | - |
| chr4 | 8517891 | 8517962 | CSAR_peak_ | 17.82         | - |
| chr4 | 8518045 | 8518096 | CSAR_peak_ | 10.83         | - |
| chr4 | 8518187 | 8518302 | CSAR_peak_ | 21.1,6.85,7.7 | - |
| chr4 | 8518304 | 8518540 | CSAR_peak_ | 29.69,19.45,1 | - |
| chr4 | 8518578 | 8518662 | CSAR_peak_ | 8.09,33.47,1  | - |
| chr4 | 8518679 | 8518732 | CSAR_peak_ | 9.58,6.44     | - |
| chr4 | 8518734 | 8518922 | CSAR_peak_ | 21.35,17.65,1 | - |
| chr4 | 8518941 | 8519016 | CSAR_peak_ | 11.63,18.85   | - |
| chr4 | 8519025 | 8519462 | CSAR_peak_ | 7.93,33.52,5  | - |
| chr4 | 8519498 | 8519578 | CSAR_peak_ | 10.53,12.54   | - |
| chr4 | 8519668 | 8519787 | CSAR_peak_ | 32.37,37.55   | - |
| chr4 | 8519802 | 8519863 | CSAR_peak_ | 39.95,25.54   | - |
| chr4 | 8519892 | 8519991 | CSAR_peak_ | 23.07,17.69   | - |
| chr4 | 8520007 | 8520080 | CSAR_peak_ | 38.14,24.38   | - |
| chr4 | 8520105 | 8520162 | CSAR_peak_ | 8.39          | - |
| chr4 | 8520168 | 8520248 | CSAR_peak_ | 10.95,11.63   | - |
| chr4 | 8520332 | 8520381 | CSAR_peak_ | 24.21,28.21   | - |
| chr4 | 8523261 | 8523361 | CSAR_peak_ | 6.03,7.27     | - |
| chr4 | 8528646 | 8528686 | CSAR_peak_ | 8.39          | - |
| chr4 | 8531422 | 8531489 | CSAR_peak_ | 6.21          | - |
| chr4 | 8535065 | 8535117 | CSAR_peak_ | 8.39          | - |
| chr4 | 8535420 | 8535489 | CSAR_peak_ | 6.81          | - |
| chr4 | 8535589 | 8535634 | CSAR_peak_ | 12.17         | - |
| chr4 | 8548812 | 8548849 | CSAR_peak_ | 5.86          | - |
| chr4 | 8550248 | 8550314 | CSAR_peak_ | 9.58,6.57     | - |
| chr4 | 8565877 | 8565950 | CSAR_peak_ | 7.27          | - |
| chr4 | 8567479 | 8567540 | CSAR_peak_ | 9.58          | - |
| chr4 | 8610989 | 8611066 | CSAR_peak_ | 10.83         | - |
| chr4 | 8612061 | 8612100 | CSAR_peak_ | 9.58          | - |
| chr4 | 8612232 | 8612264 | CSAR_peak_ | 6.21          | - |
| chr4 | 8629978 | 8630056 | CSAR_peak_ | 5.95,12.13    | - |
| chr4 | 8630272 | 8630330 | CSAR_peak_ | 7.92,6.21     | - |
| chr4 | 8630792 | 8630803 | CSAR_peak_ | 7.58          | - |
| chr4 | 8630888 | 8630960 | CSAR_peak_ | 19.36,7.27    | - |
| chr4 | 8631234 | 8631294 | CSAR_peak_ | 17.82,9.77    | - |
| chr4 | 8631785 | 8631973 | CSAR_peak_ | 13.48,9.58    | - |

|      |         |         |            |               |   |
|------|---------|---------|------------|---------------|---|
| chr4 | 8632123 | 8632162 | CSAR_peak_ | 7.27          | - |
| chr4 | 8632510 | 8632565 | CSAR_peak_ | 12.13         | - |
| chr4 | 8712571 | 8712661 | CSAR_peak_ | 44.29,6.44,21 | - |
| chr4 | 8712735 | 8712832 | CSAR_peak_ | 58.95,10.21,4 | - |
| chr4 | 8712878 | 8712966 | CSAR_peak_ | 12.64,7.18,10 | - |
| chr4 | 8713054 | 8713141 | CSAR_peak_ | 26.02,7.27,20 | - |
| chr4 | 8713241 | 8713272 | CSAR_peak_ | 17.85,6.84,10 | - |
| chr4 | 8713279 | 8713336 | CSAR_peak_ | 31.72,40.37   | - |
| chr4 | 8755336 | 8755419 | CSAR_peak_ | 10.83,8.39    | - |
| chr4 | 8755756 | 8755781 | CSAR_peak_ | 7.27          | - |
| chr4 | 8756914 | 8756987 | CSAR_peak_ | 6.21,7.27     | - |
| chr4 | 8757078 | 8757140 | CSAR_peak_ | 13.48         | - |
| chr4 | 8757235 | 8757280 | CSAR_peak_ | 7.27          | - |
| chr4 | 8757489 | 8757533 | CSAR_peak_ | 8.65          | - |
| chr4 | 8864785 | 8864841 | CSAR_peak_ | 12.13         | - |
| chr4 | 8864993 | 8865041 | CSAR_peak_ | 13.48,16.05   | - |
| chr4 | 8865061 | 8865179 | CSAR_peak_ | 16.77,13.66   | - |
| chr4 | 8865235 | 8865373 | CSAR_peak_ | 13.66,12.31,4 | - |
| chr4 | 8865458 | 8865566 | CSAR_peak_ | 14.93,15.36,1 | - |
| chr4 | 8865628 | 8865776 | CSAR_peak_ | 12.17,23.49,1 | - |
| chr4 | 8865796 | 8865853 | CSAR_peak_ | 9.03,17.37    | - |
| chr4 | 8865871 | 8865941 | CSAR_peak_ | 13.29,7.36    | - |
| chr4 | 8866010 | 8866093 | CSAR_peak_ | 24.52,5.86,5  | - |
| chr4 | 8866097 | 8866126 | CSAR_peak_ | 6.38          | - |
| chr4 | 8866164 | 8866182 | CSAR_peak_ | 8.16,6.58     | - |
| chr4 | 8866274 | 8866400 | CSAR_peak_ | 10.45,9.32,9  | - |
| chr4 | 8866441 | 8866476 | CSAR_peak_ | 6.95          | - |
| chr4 | 8866479 | 8866603 | CSAR_peak_ | 25.18,7.26    | - |
| chr4 | 8866683 | 8866759 | CSAR_peak_ | 6.03,10.21,7  | - |
| chr4 | 8866764 | 8866804 | CSAR_peak_ | 6.11          | - |
| chr4 | 8866808 | 8866973 | CSAR_peak_ | 19.83,8.02,9  | - |
| chr4 | 8867025 | 8867164 | CSAR_peak_ | 14.88,21.35,1 | - |
| chr4 | 8867388 | 8867423 | CSAR_peak_ | 21.53,18.1    | - |
| chr4 | 8867493 | 8867676 | CSAR_peak_ | 22.52,10.96,1 | - |
| chr4 | 8867699 | 8867935 | CSAR_peak_ | 13.44,35.83,1 | - |
| chr4 | 8868014 | 8868104 | CSAR_peak_ | 10.33,16.77,1 | - |
| chr4 | 8868158 | 8868177 | CSAR_peak_ | 7.78          | - |
| chr4 | 8868271 | 8868419 | CSAR_peak_ | 30.59,16.22,1 | - |
| chr4 | 8868776 | 8868852 | CSAR_peak_ | 7.27          | - |
| chr4 | 8868954 | 8869026 | CSAR_peak_ | 12.13         | - |
| chr4 | 8869118 | 8869184 | CSAR_peak_ | 10.95         | - |
| chr4 | 8972898 | 8973204 | CSAR_peak_ | 14.85,12.31,1 | - |

|      |         |         |            |                |   |
|------|---------|---------|------------|----------------|---|
| chr4 | 8973207 | 8973327 | CSAR_peak_ | 27.83,24.33    | - |
| chr4 | 8973395 | 8973538 | CSAR_peak_ | 8.95,14.88     | - |
| chr4 | 8973684 | 8973754 | CSAR_peak_ | 9.58           | - |
| chr4 | 8973818 | 8973863 | CSAR_peak_ | 6.21           | - |
| chr4 | 8974009 | 8974120 | CSAR_peak_ | 32.66,5.62,3!  | - |
| chr4 | 8974161 | 8974171 | CSAR_peak_ | 12.31,6.21     | - |
| chr4 | 8974181 | 8974235 | CSAR_peak_ | 7.92,6.44      | - |
| chr4 | 8974250 | 8974320 | CSAR_peak_ | 9.27           | - |
| chr4 | 8974406 | 8974541 | CSAR_peak_ | 12.27,20.94,!  | - |
| chr4 | 8976195 | 8976256 | CSAR_peak_ | 7.27           | - |
| chr4 | 8986937 | 8987001 | CSAR_peak_ | 8.39           | - |
| chr4 | 8987678 | 8987726 | CSAR_peak_ | 8.39,10.83     | - |
| chr4 | 8988337 | 8988361 | CSAR_peak_ | 8.39           | - |
| chr4 | 9032403 | 9032460 | CSAR_peak_ | 15.96,6.03     | - |
| chr4 | 9032896 | 9033009 | CSAR_peak_ | 16.19          | - |
| chr4 | 9033301 | 9033350 | CSAR_peak_ | 9.58           | - |
| chr4 | 9096925 | 9097039 | CSAR_peak_ | 11.03,6.21,1!  | - |
| chr4 | 9097194 | 9097241 | CSAR_peak_ | 5.86           | - |
| chr4 | 9134296 | 9134325 | CSAR_peak_ | 6.21           | - |
| chr4 | 9134564 | 9134754 | CSAR_peak_ | 13.51,20.43    | - |
| chr4 | 9135222 | 9135264 | CSAR_peak_ | 7.27           | - |
| chr4 | 9135703 | 9135751 | CSAR_peak_ | 10.83,8.39,5.- | - |
| chr4 | 9136471 | 9136548 | CSAR_peak_ | 12.13          | - |
| chr4 | 9136671 | 9136721 | CSAR_peak_ | 6.21           | - |
| chr4 | 9138576 | 9138615 | CSAR_peak_ | 6.21           | - |
| chr4 | 9138954 | 9139012 | CSAR_peak_ | 12.13          | - |
| chr4 | 9139699 | 9139752 | CSAR_peak_ | 10.83          | - |
| chr4 | 9139964 | 9140012 | CSAR_peak_ | 6.21           | - |
| chr4 | 9140069 | 9140118 | CSAR_peak_ | 7.27           | - |
| chr4 | 9140716 | 9140785 | CSAR_peak_ | 17.4           | - |
| chr4 | 9141384 | 9141483 | CSAR_peak_ | 14.88          | - |
| chr4 | 9142647 | 9142681 | CSAR_peak_ | 12.13          | - |
| chr4 | 9142813 | 9142872 | CSAR_peak_ | 5.62,19.36     | - |
| chr4 | 9142988 | 9143051 | CSAR_peak_ | 9.58,14.88,5.- | - |
| chr4 | 9144315 | 9144398 | CSAR_peak_ | 17.4,20.43     | - |
| chr4 | 9166095 | 9166144 | CSAR_peak_ | 7.27           | - |
| chr4 | 9167270 | 9167331 | CSAR_peak_ | 17.82          | - |
| chr4 | 9167680 | 9167737 | CSAR_peak_ | 12.13,19.36    | - |
| chr4 | 9197171 | 9197238 | CSAR_peak_ | 7.27           | - |
| chr4 | 9200315 | 9200361 | CSAR_peak_ | 7.27           | - |
| chr4 | 9205941 | 9206053 | CSAR_peak_ | 17.82          | - |
| chr4 | 9206261 | 9206393 | CSAR_peak_ | 27.64,10.83    | - |

|      |         |         |            |                |   |
|------|---------|---------|------------|----------------|---|
| chr4 | 9207341 | 9207417 | CSAR_peak_ | 12.13,6.44,1:  | - |
| chr4 | 9207590 | 9207613 | CSAR_peak_ | 6.21           | - |
| chr4 | 9207792 | 9207825 | CSAR_peak_ | 12.13          | - |
| chr4 | 9208023 | 9208044 | CSAR_peak_ | 6.21           | - |
| chr4 | 9208135 | 9208179 | CSAR_peak_ | 6.21           | - |
| chr4 | 9208233 | 9208284 | CSAR_peak_ | 6.94,8.52      | - |
| chr4 | 9208305 | 9208330 | CSAR_peak_ | 5.95           | - |
| chr4 | 9208906 | 9208956 | CSAR_peak_ | 7.27           | - |
| chr4 | 9210022 | 9210099 | CSAR_peak_ | 14.88          | - |
| chr4 | 9210285 | 9210350 | CSAR_peak_ | 8.39,7.26      | - |
| chr4 | 9210438 | 9210515 | CSAR_peak_ | 6.85,8.14,9.7- | - |
| chr4 | 9211077 | 9211113 | CSAR_peak_ | 23.03          | - |
| chr4 | 9211297 | 9211364 | CSAR_peak_ | 33.03          | - |
| chr4 | 9211429 | 9211463 | CSAR_peak_ | 7.27           | - |
| chr4 | 9211465 | 9211507 | CSAR_peak_ | 8.39           | - |
| chr4 | 9212248 | 9212304 | CSAR_peak_ | 7.27           | - |
| chr4 | 9212591 | 9212629 | CSAR_peak_ | 7.27           | - |
| chr4 | 9213063 | 9213161 | CSAR_peak_ | 7.27           | - |
| chr4 | 9213232 | 9213326 | CSAR_peak_ | 9.58           | - |
| chr4 | 9213577 | 9213666 | CSAR_peak_ | 24.17,7.92     | - |
| chr4 | 9213753 | 9213824 | CSAR_peak_ | 7.58,12.13     | - |
| chr4 | 9214079 | 9214113 | CSAR_peak_ | 7.27           | - |
| chr4 | 9226886 | 9226936 | CSAR_peak_ | 13.48          | - |
| chr4 | 9229216 | 9229263 | CSAR_peak_ | 7.58           | - |
| chr4 | 9229315 | 9229378 | CSAR_peak_ | 12.13,9.58     | - |
| chr4 | 9229622 | 9229706 | CSAR_peak_ | 13.44          | - |
| chr4 | 9230376 | 9230428 | CSAR_peak_ | 12.13          | - |
| chr4 | 9233262 | 9233344 | CSAR_peak_ | 12.13,7.27     | - |
| chr4 | 9235368 | 9235411 | CSAR_peak_ | 9.58           | - |
| chr4 | 9237776 | 9237819 | CSAR_peak_ | 7.27           | - |
| chr4 | 9238349 | 9238390 | CSAR_peak_ | 12.17          | - |
| chr4 | 9238470 | 9238533 | CSAR_peak_ | 13.66,9.77     | - |
| chr4 | 9240367 | 9240436 | CSAR_peak_ | 6.21           | - |
| chr4 | 9263084 | 9263129 | CSAR_peak_ | 12.13          | - |
| chr4 | 9263743 | 9263823 | CSAR_peak_ | 13.48          | - |
| chr4 | 9264273 | 9264300 | CSAR_peak_ | 7.27           | - |
| chr4 | 9269238 | 9269319 | CSAR_peak_ | 7.27           | - |
| chr4 | 9269674 | 9269738 | CSAR_peak_ | 8.39,6.21      | - |
| chr4 | 9293589 | 9293674 | CSAR_peak_ | 7.27,7.92      | - |
| chr4 | 9293899 | 9293967 | CSAR_peak_ | 22.56          | - |
| chr4 | 9294175 | 9294225 | CSAR_peak_ | 6.81           | - |
| chr4 | 9294373 | 9294436 | CSAR_peak_ | 12.13          | - |



|      |         |         |            |                |   |
|------|---------|---------|------------|----------------|---|
| chr4 | 9294459 | 9294495 | CSAR_peak_ | 7.92           | - |
| chr4 | 9294656 | 9294746 | CSAR_peak_ | 13.48,13.92    | - |
| chr4 | 9294859 | 9294944 | CSAR_peak_ | 9.58,12.17     | - |
| chr4 | 9294949 | 9295003 | CSAR_peak_ | 12.13          | - |
| chr4 | 9295067 | 9295127 | CSAR_peak_ | 14.88          | - |
| chr4 | 9301078 | 9301146 | CSAR_peak_ | 8.39,10.83     | - |
| chr4 | 9301297 | 9301417 | CSAR_peak_ | 17.82,17.51    | - |
| chr4 | 9301584 | 9301778 | CSAR_peak_ | 7,17.82,5.62,- | - |
| chr4 | 9301788 | 9301826 | CSAR_peak_ | 9.55           | - |
| chr4 | 9301858 | 9301904 | CSAR_peak_ | 10.83          | - |
| chr4 | 9306064 | 9306154 | CSAR_peak_ | 8.65           | - |
| chr4 | 9306412 | 9306453 | CSAR_peak_ | 8.65           | - |
| chr4 | 9306887 | 9306983 | CSAR_peak_ | 10.83,9.77     | - |
| chr4 | 9307135 | 9307221 | CSAR_peak_ | 7.26,6.21      | - |
| chr4 | 9307234 | 9307253 | CSAR_peak_ | 6.94           | - |
| chr4 | 9307344 | 9307362 | CSAR_peak_ | 16.77,10.31    | - |
| chr4 | 9307388 | 9307440 | CSAR_peak_ | 25.91          | - |
| chr4 | 9307475 | 9307619 | CSAR_peak_ | 25.91,6.57,9.- | - |
| chr4 | 9307686 | 9307777 | CSAR_peak_ | 14.76,23.49    | - |
| chr4 | 9307927 | 9307983 | CSAR_peak_ | 11.38,8.7      | - |
| chr4 | 9308077 | 9308125 | CSAR_peak_ | 8.13           | - |
| chr4 | 9308346 | 9308413 | CSAR_peak_ | 9.61,7.73      | - |
| chr4 | 9329770 | 9329813 | CSAR_peak_ | 7.27           | - |
| chr4 | 9363121 | 9363210 | CSAR_peak_ | 5.86,13.48,6.- | - |
| chr4 | 9387480 | 9387544 | CSAR_peak_ | 10.83          | - |
| chr4 | 9387780 | 9387933 | CSAR_peak_ | 17.82,10.12    | - |
| chr4 | 9388144 | 9388212 | CSAR_peak_ | 23.03,7.26     | - |
| chr4 | 9388362 | 9388398 | CSAR_peak_ | 8.39           | - |
| chr4 | 9388470 | 9388576 | CSAR_peak_ | 6.21,13.48     | - |
| chr4 | 9389352 | 9389412 | CSAR_peak_ | 21.94          | - |
| chr4 | 9389621 | 9389704 | CSAR_peak_ | 20.94,14.88    | - |
| chr4 | 9389814 | 9389859 | CSAR_peak_ | 12.13          | - |
| chr4 | 9390062 | 9390331 | CSAR_peak_ | 12.31,19.18,-  | - |
| chr4 | 9390353 | 9390443 | CSAR_peak_ | 9.55,14.88     | - |
| chr4 | 9390458 | 9390638 | CSAR_peak_ | 5.86,15.2,5.8- | - |
| chr4 | 9400179 | 9400288 | CSAR_peak_ | 16.11          | - |
| chr4 | 9400660 | 9400727 | CSAR_peak_ | 10.95,12.17    | - |
| chr4 | 9424909 | 9424984 | CSAR_peak_ | 8.39,9.58      | - |
| chr4 | 9425054 | 9425178 | CSAR_peak_ | 20.43,10.02    | - |
| chr4 | 9425223 | 9425229 | CSAR_peak_ | 7.27           | - |
| chr4 | 9425343 | 9425415 | CSAR_peak_ | 10.02,8.13     | - |
| chr4 | 9425503 | 9425586 | CSAR_peak_ | 19.36,11.38    | - |

|      |         |         |            |                 |   |
|------|---------|---------|------------|-----------------|---|
| chr4 | 9425602 | 9425802 | CSAR_peak_ | 32.27,20.43     | - |
| chr4 | 9425897 | 9425948 | CSAR_peak_ | 10.53           | - |
| chr4 | 9426216 | 9426299 | CSAR_peak_ | 6.21            | - |
| chr4 | 9426343 | 9426437 | CSAR_peak_ | 12.31,12.13     | - |
| chr4 | 9426457 | 9426542 | CSAR_peak_ | 10.83,14.88     | - |
| chr4 | 9426587 | 9426627 | CSAR_peak_ | 6.21            | - |
| chr4 | 9426655 | 9426908 | CSAR_peak_ | 38.23,14.85,,-  |   |
| chr4 | 9427077 | 9427178 | CSAR_peak_ | 16.57,7.78,3,-  |   |
| chr4 | 9427206 | 9427368 | CSAR_peak_ | 16.11,46.67     | - |
| chr4 | 9427450 | 9427613 | CSAR_peak_ | 34.89,29        | - |
| chr4 | 9427698 | 9427729 | CSAR_peak_ | 11.07,24.01     | - |
| chr4 | 9427864 | 9427960 | CSAR_peak_ | 14.85           | - |
| chr4 | 9427965 | 9428021 | CSAR_peak_ | 19.36           | - |
| chr4 | 9428054 | 9428142 | CSAR_peak_ | 16.87,6.81,8.-  |   |
| chr4 | 9428150 | 9428259 | CSAR_peak_ | 19.21,7.68      | - |
| chr4 | 9428314 | 9428430 | CSAR_peak_ | 10.94,14.61,-,- |   |
| chr4 | 9428436 | 9428530 | CSAR_peak_ | 6.81,9.77       | - |
| chr4 | 9428552 | 9428732 | CSAR_peak_ | 26.69,13.48,-,- |   |
| chr4 | 9430475 | 9430524 | CSAR_peak_ | 13.48           | - |
| chr4 | 9430777 | 9430922 | CSAR_peak_ | 9.58,8.14,7.2-  |   |
| chr4 | 9431721 | 9431781 | CSAR_peak_ | 12.13           | - |
| chr4 | 9434164 | 9434220 | CSAR_peak_ | 8.39            | - |
| chr4 | 9435268 | 9435331 | CSAR_peak_ | 9.58            | - |
| chr4 | 9435728 | 9435763 | CSAR_peak_ | 7.58            | - |
| chr4 | 9435874 | 9435886 | CSAR_peak_ | 7.27            | - |
| chr4 | 9482315 | 9482358 | CSAR_peak_ | 6.21            | - |
| chr4 | 9482529 | 9482593 | CSAR_peak_ | 7.27            | - |
| chr4 | 9482763 | 9482821 | CSAR_peak_ | 9.58            | - |
| chr4 | 9483162 | 9483256 | CSAR_peak_ | 14.88,10.31,-,- |   |
| chr4 | 9483289 | 9483347 | CSAR_peak_ | 12.13           | - |
| chr4 | 9483485 | 9483572 | CSAR_peak_ | 9.58            | - |
| chr4 | 9483754 | 9483842 | CSAR_peak_ | 36.78,9.77      | - |
| chr4 | 9483986 | 9484139 | CSAR_peak_ | 33.03,8.39,1(-  |   |
| chr4 | 9484172 | 9484227 | CSAR_peak_ | 14.88           | - |
| chr4 | 9484257 | 9484375 | CSAR_peak_ | 14.88,9.58      | - |
| chr4 | 9484523 | 9484611 | CSAR_peak_ | 14.88           | - |
| chr4 | 9484617 | 9484678 | CSAR_peak_ | 13.44,9.58      | - |
| chr4 | 9484990 | 9485237 | CSAR_peak_ | 34.93,36.59,-,- |   |
| chr4 | 9485273 | 9485329 | CSAR_peak_ | 10.83,9.58      | - |
| chr4 | 9485569 | 9485646 | CSAR_peak_ | 14.88           | - |
| chr4 | 9485666 | 9485739 | CSAR_peak_ | 8.39,26.69,1(-  |   |
| chr4 | 9485751 | 9485799 | CSAR_peak_ | 7.27            | - |

|      |         |         |            |                 |
|------|---------|---------|------------|-----------------|
| chr4 | 9485912 | 9486156 | CSAR_peak_ | 16.33,8.2,10.-  |
| chr4 | 9486235 | 9486309 | CSAR_peak_ | 21.56,18.73 -   |
| chr4 | 9486311 | 9486368 | CSAR_peak_ | 9.58 -          |
| chr4 | 9486408 | 9486538 | CSAR_peak_ | 28.62,17.3 -    |
| chr4 | 9486585 | 9486700 | CSAR_peak_ | 17.4,17.51 -    |
| chr4 | 9486861 | 9486923 | CSAR_peak_ | 29.4,6.03 -     |
| chr4 | 9487006 | 9487439 | CSAR_peak_ | 17.68,31.95,-   |
| chr4 | 9487465 | 9488108 | CSAR_peak_ | 54.12,63.78,-   |
| chr4 | 9488222 | 9488328 | CSAR_peak_ | 12.13,16.33 -   |
| chr4 | 9488557 | 9488853 | CSAR_peak_ | 72.59,54.73,-   |
| chr4 | 9488867 | 9489278 | CSAR_peak_ | 14.88,22.56,-   |
| chr4 | 9489308 | 9489613 | CSAR_peak_ | 33.08,27.61 -   |
| chr4 | 9489753 | 9489852 | CSAR_peak_ | 11.96,6.11 -    |
| chr4 | 9489965 | 9490105 | CSAR_peak_ | 29.16,26.3 -    |
| chr4 | 9490110 | 9490288 | CSAR_peak_ | 9.58,20.94 -    |
| chr4 | 9490367 | 9490379 | CSAR_peak_ | 9.77,10.02 -    |
| chr4 | 9490400 | 9490585 | CSAR_peak_ | 18.35,18.35 -   |
| chr4 | 9490621 | 9491476 | CSAR_peak_ | 11.38,16.11,-   |
| chr4 | 9491521 | 9491810 | CSAR_peak_ | 29,44.46 -      |
| chr4 | 9491859 | 9492083 | CSAR_peak_ | 50.28,44.77,-   |
| chr4 | 9492104 | 9492151 | CSAR_peak_ | 13.48 -         |
| chr4 | 9492193 | 9492254 | CSAR_peak_ | 13.48 -         |
| chr4 | 9492872 | 9492908 | CSAR_peak_ | 7.92 -          |
| chr4 | 9492980 | 9493025 | CSAR_peak_ | 14.88 -         |
| chr4 | 9493108 | 9493234 | CSAR_peak_ | 54.29,67.11 -   |
| chr4 | 9493257 | 9493314 | CSAR_peak_ | 8.39,7.58 -     |
| chr4 | 9493539 | 9493606 | CSAR_peak_ | 14.63,33.03 -   |
| chr4 | 9493704 | 9493830 | CSAR_peak_ | 24.52,17.28 -   |
| chr4 | 9493872 | 9493908 | CSAR_peak_ | 7.27 -          |
| chr4 | 9494228 | 9494278 | CSAR_peak_ | 14.88,12.13 -   |
| chr4 | 9494441 | 9494516 | CSAR_peak_ | 7.27,7.27 -     |
| chr4 | 9494882 | 9494939 | CSAR_peak_ | 13.44 -         |
| chr4 | 9495136 | 9495201 | CSAR_peak_ | 14.76 -         |
| chr4 | 9495225 | 9495484 | CSAR_peak_ | 33.03,19.98 -   |
| chr4 | 9497802 | 9497859 | CSAR_peak_ | 6.21,7.27 -     |
| chr4 | 9499025 | 9499157 | CSAR_peak_ | (8.14,13.29,7.- |
| chr4 | 9499298 | 9499375 | CSAR_peak_ | 6.21 -          |
| chr4 | 9499577 | 9499629 | CSAR_peak_ | 7.27 -          |
| chr4 | 9499796 | 9499888 | CSAR_peak_ | 12.31 -         |
| chr4 | 9499892 | 9499949 | CSAR_peak_ | 9.77,12.13 -    |
| chr4 | 9500122 | 9500163 | CSAR_peak_ | 7.27 -          |
| chr4 | 9500434 | 9500497 | CSAR_peak_ | 16.11,12.13 -   |

|      |         |         |            |                 |
|------|---------|---------|------------|-----------------|
| chr4 | 9500577 | 9500972 | CSAR_peak_ | 13.59,38.61,-   |
| chr4 | 9501092 | 9501148 | CSAR_peak_ | 10.31 -         |
| chr4 | 9501377 | 9501537 | CSAR_peak_ | 8.39,25.07 -    |
| chr4 | 9501597 | 9501652 | CSAR_peak_ | 7.27 -          |
| chr4 | 9501689 | 9501754 | CSAR_peak_ | 12.5,16.08 -    |
| chr4 | 9501889 | 9501940 | CSAR_peak_ | 7.73,6.57 -     |
| chr4 | 9502172 | 9502214 | CSAR_peak_ | 6.03 -          |
| chr4 | 9502374 | 9502440 | CSAR_peak_ | 7.92 -          |
| chr4 | 9502542 | 9502592 | CSAR_peak_ | 9.58 -          |
| chr4 | 9502780 | 9503002 | CSAR_peak_ | 23.89,12.31 -   |
| chr4 | 9503139 | 9503179 | CSAR_peak_ | 8.65 -          |
| chr4 | 9503257 | 9503267 | CSAR_peak_ | 8.28,9.58 -     |
| chr4 | 9503277 | 9503436 | CSAR_peak_ | (8.39,6.21,21.- |
| chr4 | 9503557 | 9503733 | CSAR_peak_ | 36.68,12.62,(   |
| chr4 | 9503735 | 9504087 | CSAR_peak_ | 55.78,50.33,(   |
| chr4 | 9504100 | 9504219 | CSAR_peak_ | 16.55,17.51 -   |
| chr4 | 9504272 | 9504328 | CSAR_peak_ | 6.44 -          |
| chr4 | 9504429 | 9504512 | CSAR_peak_ | 13.84,17.52 -   |
| chr4 | 9504514 | 9504667 | CSAR_peak_ | 14.88,16.22 -   |
| chr4 | 9504752 | 9505084 | CSAR_peak_ | 19.35,61.33,!   |
| chr4 | 9505096 | 9505132 | CSAR_peak_ | 7.27 -          |
| chr4 | 9505171 | 9505231 | CSAR_peak_ | 12.13 -         |
| chr4 | 9505233 | 9505327 | CSAR_peak_ | 8.65,7.27 -     |
| chr4 | 9505444 | 9505606 | CSAR_peak_ | 13.29,12.94,!   |
| chr4 | 9506970 | 9507007 | CSAR_peak_ | 8.39 -          |
| chr4 | 9509837 | 9509905 | CSAR_peak_ | 7.27 -          |
| chr4 | 9512375 | 9512467 | CSAR_peak_ | 6.57,20.94,1(   |
| chr4 | 9512864 | 9512929 | CSAR_peak_ | 6.21,12.13 -    |
| chr4 | 9512979 | 9513015 | CSAR_peak_ | 6.21 -          |
| chr4 | 9514886 | 9514932 | CSAR_peak_ | 9.58,6.21 -     |
| chr4 | 9514982 | 9515064 | CSAR_peak_ | 19.93,26.69 -   |
| chr4 | 9515149 | 9515232 | CSAR_peak_ | 7.58,7.27 -     |
| chr4 | 9516083 | 9516218 | CSAR_peak_ | 6.21 -          |
| chr4 | 9518160 | 9518211 | CSAR_peak_ | 14.88 -         |
| chr4 | 9518576 | 9518686 | CSAR_peak_ | 10.95 -         |
| chr4 | 9518753 | 9518794 | CSAR_peak_ | 7.27 -          |
| chr4 | 9519104 | 9519140 | CSAR_peak_ | 6.21 -          |
| chr4 | 9519562 | 9519616 | CSAR_peak_ | 7.73,6.1 -      |
| chr4 | 9520116 | 9520185 | CSAR_peak_ | 9.77,14.88 -    |
| chr4 | 9520221 | 9520338 | CSAR_peak_ | 10.83 -         |
| chr4 | 9520416 | 9520474 | CSAR_peak_ | 6.21 -          |
| chr4 | 9520691 | 9520741 | CSAR_peak_ | 6.03 -          |

|      |         |         |            |               |   |
|------|---------|---------|------------|---------------|---|
| chr4 | 9521084 | 9521325 | CSAR_peak_ | 11.83,12.13   | - |
| chr4 | 9521435 | 9521489 | CSAR_peak_ | 13.48,12.17   | - |
| chr4 | 9521556 | 9521564 | CSAR_peak_ | 5.95          | - |
| chr4 | 9521677 | 9521757 | CSAR_peak_ | 17.63,16.3    | - |
| chr4 | 9521858 | 9521955 | CSAR_peak_ | 9.58,20.94    | - |
| chr4 | 9522629 | 9522670 | CSAR_peak_ | 7.58          | - |
| chr4 | 9524060 | 9524156 | CSAR_peak_ | 22.58,23.8    | - |
| chr4 | 9524177 | 9524230 | CSAR_peak_ | 13.48,12.17   | - |
| chr4 | 9524366 | 9524379 | CSAR_peak_ | 6.21          | - |
| chr4 | 9524706 | 9524766 | CSAR_peak_ | 16.11,12.17   | - |
| chr4 | 9524867 | 9524906 | CSAR_peak_ | 11.38,6.03    | - |
| chr4 | 9531962 | 9532002 | CSAR_peak_ | 7.58          | - |
| chr4 | 9532031 | 9532117 | CSAR_peak_ | 14.88         | - |
| chr4 | 9532197 | 9532238 | CSAR_peak_ | 9.58          | - |
| chr4 | 9533178 | 9533220 | CSAR_peak_ | 7.27          | - |
| chr4 | 9533462 | 9533521 | CSAR_peak_ | 9.97          | - |
| chr4 | 9533610 | 9533699 | CSAR_peak_ | 16.25,20.94   | - |
| chr4 | 9533735 | 9533785 | CSAR_peak_ | 9.58,8.39     | - |
| chr4 | 9533980 | 9534112 | CSAR_peak_ | 12.13,10.83,- | - |
| chr4 | 9534142 | 9534180 | CSAR_peak_ | 6.21          | - |
| chr4 | 9534215 | 9534287 | CSAR_peak_ | 10.83         | - |
| chr4 | 9534765 | 9534810 | CSAR_peak_ | 12.13         | - |
| chr4 | 9535081 | 9535123 | CSAR_peak_ | 9.58          | - |
| chr4 | 9535480 | 9535553 | CSAR_peak_ | 18.35,26.69   | - |
| chr4 | 9535758 | 9535801 | CSAR_peak_ | 8.39          | - |
| chr4 | 9535926 | 9536035 | CSAR_peak_ | 13.48,8.28    | - |
| chr4 | 9536530 | 9536595 | CSAR_peak_ | 8.39          | - |
| chr4 | 9536624 | 9536753 | CSAR_peak_ | 9.41,8.39     | - |
| chr4 | 9536856 | 9536943 | CSAR_peak_ | 9.58,9.58     | - |
| chr4 | 9536998 | 9537016 | CSAR_peak_ | 13.48         | - |
| chr4 | 9537161 | 9537332 | CSAR_peak_ | 19.36,14.76   | - |
| chr4 | 9538170 | 9538242 | CSAR_peak_ | 13.66         | - |
| chr4 | 9538323 | 9538487 | CSAR_peak_ | 24.21,17.82,- | - |
| chr4 | 9538500 | 9538548 | CSAR_peak_ | 7.58,7.27     | - |
| chr4 | 9538892 | 9539061 | CSAR_peak_ | 14.88,13.48   | - |
| chr4 | 9539123 | 9539237 | CSAR_peak_ | 14,17.37      | - |
| chr4 | 9539282 | 9539477 | CSAR_peak_ | 29.19,40.09,- | - |
| chr4 | 9539485 | 9539836 | CSAR_peak_ | 33.65,41.78,- | - |
| chr4 | 9539852 | 9540009 | CSAR_peak_ | 25.91,22.56   | - |
| chr4 | 9540027 | 9540176 | CSAR_peak_ | 18.65,14.88   | - |
| chr4 | 9540212 | 9540329 | CSAR_peak_ | 10.83         | - |
| chr4 | 9540407 | 9540465 | CSAR_peak_ | 6.21          | - |

|      |         |         |            |                |   |
|------|---------|---------|------------|----------------|---|
| chr4 | 9540682 | 9540732 | CSAR_peak_ | 6.03           | - |
| chr4 | 9541075 | 9541316 | CSAR_peak_ | 11.83,12.13    | - |
| chr4 | 9541426 | 9541480 | CSAR_peak_ | 13.48,12.17    | - |
| chr4 | 9541547 | 9541555 | CSAR_peak_ | 5.95           | - |
| chr4 | 9541668 | 9541748 | CSAR_peak_ | 17.63,16.3     | - |
| chr4 | 9541792 | 9541943 | CSAR_peak_ | 13.85,20.43    | - |
| chr4 | 9541957 | 9542014 | CSAR_peak_ | 12.13          | - |
| chr4 | 9542070 | 9542082 | CSAR_peak_ | 7.92,6.85      | - |
| chr4 | 9542103 | 9542254 | CSAR_peak_ | 15.1,18.35     | - |
| chr4 | 9542324 | 9542567 | CSAR_peak_ | 8.28,7.27,28.  | - |
| chr4 | 9542569 | 9543028 | CSAR_peak_ | 8.39,62.2,55.  | - |
| chr4 | 9543076 | 9543154 | CSAR_peak_ | 12.74          | - |
| chr4 | 9543229 | 9543479 | CSAR_peak_ | 38.8,14.93,1(- | - |
| chr4 | 9543594 | 9543736 | CSAR_peak_ | 12.94,19.98,(- | - |
| chr4 | 9543826 | 9544085 | CSAR_peak_ | 8.14,26.32,4(- | - |
| chr4 | 9545053 | 9545117 | CSAR_peak_ | 6.85           | - |
| chr4 | 9546341 | 9546388 | CSAR_peak_ | 7.58           | - |
| chr4 | 9546693 | 9546755 | CSAR_peak_ | 7.58           | - |
| chr4 | 9546843 | 9546876 | CSAR_peak_ | 6.21           | - |
| chr4 | 9547333 | 9547516 | CSAR_peak_ | 11.03,6.85,7.- | - |
| chr4 | 9547946 | 9548008 | CSAR_peak_ | 16.33          | - |
| chr4 | 9548423 | 9548474 | CSAR_peak_ | 7.27           | - |
| chr4 | 9548835 | 9548884 | CSAR_peak_ | 8.28           | - |
| chr4 | 9549292 | 9549400 | CSAR_peak_ | 10.83,7.27     | - |
| chr4 | 9549895 | 9549960 | CSAR_peak_ | 8.39           | - |
| chr4 | 9549989 | 9550118 | CSAR_peak_ | 9.41,8.39      | - |
| chr4 | 9550221 | 9550308 | CSAR_peak_ | 9.58,9.58      | - |
| chr4 | 9550363 | 9550381 | CSAR_peak_ | 13.48          | - |
| chr4 | 9550526 | 9550697 | CSAR_peak_ | 19.36,14.76    | - |
| chr4 | 9582327 | 9582422 | CSAR_peak_ | 9.58           | - |
| chr4 | 9585601 | 9585642 | CSAR_peak_ | 6.21           | - |
| chr4 | 9586929 | 9587043 | CSAR_peak_ | 10.94,10.83    | - |
| chr4 | 9587675 | 9587719 | CSAR_peak_ | 9.58           | - |
| chr4 | 9587946 | 9587995 | CSAR_peak_ | 9.58           | - |
| chr4 | 9588148 | 9588196 | CSAR_peak_ | 10.83          | - |
| chr4 | 9593811 | 9593883 | CSAR_peak_ | 7              | - |
| chr4 | 9602799 | 9602899 | CSAR_peak_ | 13.44          | - |
| chr4 | 9603470 | 9603531 | CSAR_peak_ | 9.27,7.27      | - |
| chr4 | 9603773 | 9603835 | CSAR_peak_ | 9.27           | - |
| chr4 | 9604523 | 9604607 | CSAR_peak_ | 24.21,11.63    | - |
| chr4 | 9604668 | 9604716 | CSAR_peak_ | 8.95,16.33     | - |
| chr4 | 9604757 | 9604968 | CSAR_peak_ | 29.96,48.86    | - |

|      |         |         |            |               |   |
|------|---------|---------|------------|---------------|---|
| chr4 | 9605110 | 9606560 | CSAR_peak_ | 68.33,6.99,1! | - |
| chr4 | 9606569 | 9606638 | CSAR_peak_ | 51.57,44.69   | - |
| chr4 | 9606658 | 9606846 | CSAR_peak_ | 72,8.65,82.7! | - |
| chr4 | 9607035 | 9607280 | CSAR_peak_ | 40.76,47.28   | - |
| chr4 | 9610506 | 9610572 | CSAR_peak_ | 10.83         | - |
| chr4 | 9610685 | 9610748 | CSAR_peak_ | 10.83         | - |
| chr4 | 9610767 | 9610839 | CSAR_peak_ | 13.48         | - |
| chr4 | 9610996 | 9611125 | CSAR_peak_ | 9.58,7.27     | - |
| chr4 | 9611200 | 9611293 | CSAR_peak_ | 12.13,8.39    | - |
| chr4 | 9611390 | 9611458 | CSAR_peak_ | 20.43         | - |
| chr4 | 9611575 | 9611613 | CSAR_peak_ | 10.02,7.58    | - |
| chr4 | 9611862 | 9611922 | CSAR_peak_ | 8.39          | - |
| chr4 | 9612263 | 9612299 | CSAR_peak_ | 6.57,6.21     | - |
| chr4 | 9612379 | 9612479 | CSAR_peak_ | 9.77,8.13,8.3 | - |
| chr4 | 9614405 | 9614458 | CSAR_peak_ | 9.58          | - |
| chr4 | 9614771 | 9614821 | CSAR_peak_ | 8.39          | - |
| chr4 | 9615422 | 9615517 | CSAR_peak_ | 8.65          | - |
| chr4 | 9615607 | 9615647 | CSAR_peak_ | 7.27,7.27     | - |
| chr4 | 9616016 | 9616074 | CSAR_peak_ | 5.86,8.39,9.5 | - |
| chr4 | 9616336 | 9616376 | CSAR_peak_ | 7.27,9.48     | - |
| chr4 | 9616450 | 9616495 | CSAR_peak_ | 7.27          | - |
| chr4 | 9616572 | 9616672 | CSAR_peak_ | 7.27,19.36    | - |
| chr4 | 9617564 | 9617623 | CSAR_peak_ | 17.82,14.88   | - |
| chr4 | 9618266 | 9618349 | CSAR_peak_ | 12.13         | - |
| chr4 | 9618470 | 9618496 | CSAR_peak_ | 7.27          | - |
| chr4 | 9618597 | 9618630 | CSAR_peak_ | 7.27          | - |
| chr4 | 9618979 | 9619002 | CSAR_peak_ | 7.27          | - |
| chr4 | 9621778 | 9621839 | CSAR_peak_ | 8.39          | - |
| chr4 | 9622318 | 9622387 | CSAR_peak_ | 12.13         | - |
| chr4 | 9622613 | 9622663 | CSAR_peak_ | 7.27          | - |
| chr4 | 9623037 | 9623106 | CSAR_peak_ | 13.48         | - |
| chr4 | 9623322 | 9623362 | CSAR_peak_ | 7.27,8.39     | - |
| chr4 | 9623386 | 9623445 | CSAR_peak_ | 8.39          | - |
| chr4 | 9623553 | 9623601 | CSAR_peak_ | 6.21          | - |
| chr4 | 9624067 | 9624111 | CSAR_peak_ | 7.27          | - |
| chr4 | 9625967 | 9626019 | CSAR_peak_ | 6.94          | - |
| chr4 | 9626066 | 9626116 | CSAR_peak_ | 6.21          | - |
| chr4 | 9626480 | 9626530 | CSAR_peak_ | 6.21          | - |
| chr4 | 9627114 | 9627180 | CSAR_peak_ | 7.73,11.38    | - |
| chr4 | 9627476 | 9627593 | CSAR_peak_ | 17.82         | - |
| chr4 | 9627717 | 9627755 | CSAR_peak_ | 7.27          | - |
| chr4 | 9627765 | 9627827 | CSAR_peak_ | 12.13,11.38   | - |

|      |         |         |            |                |   |
|------|---------|---------|------------|----------------|---|
| chr4 | 9628508 | 9628564 | CSAR_peak_ | 10.62,6.21     | - |
| chr4 | 9628778 | 9628918 | CSAR_peak_ | 12.31,8.95     | - |
| chr4 | 9628959 | 9629041 | CSAR_peak_ | 6.21,7.27      | - |
| chr4 | 9629224 | 9629337 | CSAR_peak_ | 7.58,13.48,6.  | - |
| chr4 | 9629834 | 9629909 | CSAR_peak_ | 13.51          | - |
| chr4 | 9630129 | 9630225 | CSAR_peak_ | 22.56,24.21    | - |
| chr4 | 9630397 | 9630464 | CSAR_peak_ | 6.57,14.88     | - |
| chr4 | 9630883 | 9630984 | CSAR_peak_ | 36.78,8.39     | - |
| chr4 | 9631198 | 9631228 | CSAR_peak_ | 5.86           | - |
| chr4 | 9631238 | 9631285 | CSAR_peak_ | 7.27           | - |
| chr4 | 9631369 | 9631408 | CSAR_peak_ | 6.57,6.21      | - |
| chr4 | 9631500 | 9631539 | CSAR_peak_ | 6.21           | - |
| chr4 | 9631863 | 9631948 | CSAR_peak_ | 9.58,12.31     | - |
| chr4 | 9631998 | 9632066 | CSAR_peak_ | 10.83,14.76    | - |
| chr4 | 9632500 | 9632536 | CSAR_peak_ | 7.27           | - |
| chr4 | 9633080 | 9633192 | CSAR_peak_ | 7.58,8.95      | - |
| chr4 | 9633265 | 9633358 | CSAR_peak_ | 10.95,14.25    | - |
| chr4 | 9633622 | 9633732 | CSAR_peak_ | 18.73,26.05    | - |
| chr4 | 9633941 | 9634037 | CSAR_peak_ | 12.13          | - |
| chr4 | 9634051 | 9634149 | CSAR_peak_ | 10.83,17.82    | - |
| chr4 | 9634183 | 9634267 | CSAR_peak_ | 10.83,6.81,1(- | - |
| chr4 | 9634303 | 9634369 | CSAR_peak_ | 10.95,22.56    | - |
| chr4 | 9634466 | 9634520 | CSAR_peak_ | 9.58           | - |
| chr4 | 9634964 | 9635011 | CSAR_peak_ | 6.21           | - |
| chr4 | 9635148 | 9635243 | CSAR_peak_ | 6.44,27.64     | - |
| chr4 | 9635321 | 9635383 | CSAR_peak_ | 28.34          | - |
| chr4 | 9635466 | 9635601 | CSAR_peak_ | 34.26,18.65    | - |
| chr4 | 9635877 | 9635962 | CSAR_peak_ | 13.29,9.58     | - |
| chr4 | 9636365 | 9636453 | CSAR_peak_ | 6.21           | - |
| chr4 | 9636517 | 9636580 | CSAR_peak_ | 8.34           | - |
| chr4 | 9636599 | 9636657 | CSAR_peak_ | 16.34,6.44     | - |
| chr4 | 9644176 | 9644296 | CSAR_peak_ | 8.39,9.58      | - |
| chr4 | 9644682 | 9644733 | CSAR_peak_ | 6.21           | - |
| chr4 | 9644748 | 9644774 | CSAR_peak_ | 9.58           | - |
| chr4 | 9644780 | 9644820 | CSAR_peak_ | 9.58           | - |
| chr4 | 9644932 | 9645006 | CSAR_peak_ | 12.13,14.76    | - |
| chr4 | 9645260 | 9645305 | CSAR_peak_ | 8.39           | - |
| chr4 | 9645625 | 9645664 | CSAR_peak_ | 6.21           | - |
| chr4 | 9657140 | 9657261 | CSAR_peak_ | 8.28,24.21,9.  | - |
| chr4 | 9657508 | 9657573 | CSAR_peak_ | 20.43,9.58     | - |
| chr4 | 9657871 | 9657921 | CSAR_peak_ | 6.21           | - |
| chr4 | 9657923 | 9657985 | CSAR_peak_ | 6.21           | - |



|      |         |         |            |                  |   |
|------|---------|---------|------------|------------------|---|
| chr4 | 9658054 | 9658114 | CSAR_peak_ | 13.44            | - |
| chr4 | 9658147 | 9658194 | CSAR_peak_ | 8.39             | - |
| chr4 | 9658336 | 9658480 | CSAR_peak_ | 17.82,7.27,14.88 | - |
| chr4 | 9658729 | 9658780 | CSAR_peak_ | 12.13,12.13      | - |
| chr4 | 9658791 | 9658889 | CSAR_peak_ | 17.65,14.88      | - |
| chr4 | 9658898 | 9659031 | CSAR_peak_ | 17.65,10.83,     | - |
| chr4 | 9659163 | 9659206 | CSAR_peak_ | 8.14,12.13       | - |
| chr4 | 9659368 | 9659416 | CSAR_peak_ | 12.17            | - |
| chr4 | 9659775 | 9659847 | CSAR_peak_ | 7.27             | - |
| chr4 | 9660619 | 9660679 | CSAR_peak_ | 6.21             | - |
| chr4 | 9660914 | 9660969 | CSAR_peak_ | 7.27             | - |
| chr4 | 9661111 | 9661192 | CSAR_peak_ | 12.13            | - |
| chr4 | 9661200 | 9661274 | CSAR_peak_ | 6.21             | - |
| chr4 | 9661282 | 9661385 | CSAR_peak_ | 19.98,12.6       | - |
| chr4 | 9661394 | 9661724 | CSAR_peak_ | 8.92,38.71,30.8  | - |
| chr4 | 9661754 | 9661805 | CSAR_peak_ | 6.02,8.09        | - |
| chr4 | 9661885 | 9662572 | CSAR_peak_ | 25.07,15.2,21.94 | - |
| chr4 | 9662595 | 9662656 | CSAR_peak_ | 9.97,7.27        | - |
| chr4 | 9662665 | 9662988 | CSAR_peak_ | 30.8,35.83       | - |
| chr4 | 9663190 | 9663284 | CSAR_peak_ | 21.94,10.7       | - |
| chr4 | 9663303 | 9663514 | CSAR_peak_ | 25.91,10.94,     | - |
| chr4 | 9689260 | 9689336 | CSAR_peak_ | 6.21             | - |
| chr4 | 9689909 | 9690006 | CSAR_peak_ | 10.83            | - |
| chr4 | 9690168 | 9690218 | CSAR_peak_ | 17.82,9.77       | - |
| chr4 | 9690350 | 9690414 | CSAR_peak_ | 12.17,9.77       | - |
| chr4 | 9690434 | 9690471 | CSAR_peak_ | 8.39,7.58        | - |
| chr4 | 9690577 | 9690645 | CSAR_peak_ | 13.48,6.44,7.27  | - |
| chr4 | 9690780 | 9690858 | CSAR_peak_ | 12.13,10.83      | - |
| chr4 | 9691216 | 9691332 | CSAR_peak_ | 19.36,24.52      | - |
| chr4 | 9691418 | 9691475 | CSAR_peak_ | 33.47,9.77       | - |
| chr4 | 9692302 | 9692366 | CSAR_peak_ | 9.58             | - |
| chr4 | 9693174 | 9693247 | CSAR_peak_ | 8.65             | - |
| chr4 | 9693350 | 9693401 | CSAR_peak_ | 6.21,6.03        | - |
| chr4 | 9693501 | 9693574 | CSAR_peak_ | 7.27             | - |
| chr4 | 9693759 | 9693864 | CSAR_peak_ | 8.39,19.36       | - |
| chr4 | 9694316 | 9694343 | CSAR_peak_ | 6.21             | - |
| chr4 | 9694661 | 9694756 | CSAR_peak_ | 17.82,9.61       | - |
| chr4 | 9694773 | 9694823 | CSAR_peak_ | 9.58             | - |
| chr4 | 9694976 | 9695271 | CSAR_peak_ | 16.34,10.83,     | - |
| chr4 | 9695849 | 9695941 | CSAR_peak_ | 7.27             | - |
| chr4 | 9695977 | 9696041 | CSAR_peak_ | 17.82            | - |
| chr4 | 9696138 | 9696187 | CSAR_peak_ | 9.58             | - |

|      |         |         |            |               |   |
|------|---------|---------|------------|---------------|---|
| chr4 | 9696347 | 9696459 | CSAR_peak_ | 8.65,16.19    | - |
| chr4 | 9696758 | 9696868 | CSAR_peak_ | 10.83,9.58    | - |
| chr4 | 9696946 | 9697051 | CSAR_peak_ | 12.17,22.56   | - |
| chr4 | 9697350 | 9697423 | CSAR_peak_ | 11.14,13.48   | - |
| chr4 | 9714316 | 9714368 | CSAR_peak_ | 12.13,14.88   | - |
| chr4 | 9714862 | 9714914 | CSAR_peak_ | 8.39          | - |
| chr4 | 9715092 | 9715156 | CSAR_peak_ | 119.21,115.9  | - |
| chr4 | 9715431 | 9715443 | CSAR_peak_ | 12.13         | - |
| chr4 | 9715542 | 9715562 | CSAR_peak_ | 6.21          | - |
| chr4 | 9722779 | 9722830 | CSAR_peak_ | 7.27          | - |
| chr4 | 9723713 | 9723781 | CSAR_peak_ | 8.39          | - |
| chr4 | 9750399 | 9750430 | CSAR_peak_ | 6.21          | - |
| chr4 | 9750618 | 9750668 | CSAR_peak_ | 6.21          | - |
| chr4 | 9753058 | 9753104 | CSAR_peak_ | 7.58          | - |
| chr4 | 9773745 | 9773876 | CSAR_peak_ | 12.13,6.03,1  | - |
| chr4 | 9773912 | 9773959 | CSAR_peak_ | 12.13,7.27    | - |
| chr4 | 9773974 | 9774106 | CSAR_peak_ | 17.82,10.83   | - |
| chr4 | 9774112 | 9774181 | CSAR_peak_ | 13.48,7.27    | - |
| chr4 | 9774199 | 9774268 | CSAR_peak_ | 12.31,7.58    | - |
| chr4 | 9774334 | 9774437 | CSAR_peak_ | 16.22,6.21,1  | - |
| chr4 | 9774508 | 9774578 | CSAR_peak_ | 63.81,7.29    | - |
| chr4 | 9774652 | 9774689 | CSAR_peak_ | 7.27          | - |
| chr4 | 9774694 | 9774757 | CSAR_peak_ | 6.21          | - |
| chr4 | 9774824 | 9774909 | CSAR_peak_ | 7.58,8.28,5.8 | - |
| chr4 | 9775046 | 9775082 | CSAR_peak_ | 6.21          | - |
| chr4 | 9775411 | 9775463 | CSAR_peak_ | 18.95,20.94   | - |
| chr4 | 9779132 | 9779166 | CSAR_peak_ | 7.27          | - |
| chr4 | 9779300 | 9779348 | CSAR_peak_ | 8.39          | - |
| chr4 | 9786020 | 9786115 | CSAR_peak_ | 6.21,12.13    | - |
| chr4 | 9786269 | 9786375 | CSAR_peak_ | 13.29,18.95   | - |
| chr4 | 9863583 | 9863645 | CSAR_peak_ | 6.21          | - |
| chr4 | 9867700 | 9867736 | CSAR_peak_ | 7.27          | - |
| chr4 | 9867741 | 9867797 | CSAR_peak_ | 9.58          | - |
| chr4 | 9868042 | 9868084 | CSAR_peak_ | 6.21          | - |
| chr4 | 9868377 | 9868403 | CSAR_peak_ | 7.27          | - |
| chr4 | 9868544 | 9868597 | CSAR_peak_ | 7.27          | - |
| chr4 | 9869000 | 9869045 | CSAR_peak_ | 19.36         | - |
| chr4 | 9870992 | 9871054 | CSAR_peak_ | 6.21          | - |
| chr4 | 9918647 | 9918693 | CSAR_peak_ | 9.58          | - |
| chr4 | 9918974 | 9919019 | CSAR_peak_ | 8.28          | - |
| chr4 | 9919716 | 9919781 | CSAR_peak_ | 6.02,8.61     | - |
| chr4 | 9919849 | 9919961 | CSAR_peak_ | 13.48         | - |

|      |          |          |            |                 |   |
|------|----------|----------|------------|-----------------|---|
| chr4 | 9919980  | 9920070  | CSAR_peak_ | 12.17,9.58      | - |
| chr4 | 9952766  | 9952818  | CSAR_peak_ | 7.27            | - |
| chr4 | 9953285  | 9953330  | CSAR_peak_ | 6.21            | - |
| chr4 | 9967406  | 9967501  | CSAR_peak_ | 13.48,6.21      | - |
| chr4 | 9967733  | 9967827  | CSAR_peak_ | 11.99,16.33     | - |
| chr4 | 9968598  | 9968656  | CSAR_peak_ | 8.65            | - |
| chr4 | 9991084  | 9991147  | CSAR_peak_ | 14.88,9.27      | - |
| chr4 | 9991310  | 9991393  | CSAR_peak_ | 17.82,5.86      | - |
| chr4 | 9991452  | 9991580  | CSAR_peak_ | 9.58,8.14,16.-  | - |
| chr4 | 9991627  | 9991669  | CSAR_peak_ | 17.69,13.48     | - |
| chr4 | 9991749  | 9991899  | CSAR_peak_ | 27.77,35.7      | - |
| chr4 | 9991916  | 9992154  | CSAR_peak_ | 8.14,30.8,36.-  | - |
| chr4 | 9992219  | 9992690  | CSAR_peak_ | 8.14,50.62,6.-  | - |
| chr4 | 9992716  | 9993034  | CSAR_peak_ | 37.06,39.34,;-  | - |
| chr4 | 9993049  | 9993094  | CSAR_peak_ | 12.13,7.92      | - |
| chr4 | 9993229  | 9993472  | CSAR_peak_ | 19.18,22.58,;-  | - |
| chr4 | 9993687  | 9993996  | CSAR_peak_ | 37.44,16.57,;-  | - |
| chr4 | 9994067  | 9994121  | CSAR_peak_ | 56.27,19.49     | - |
| chr4 | 10003881 | 10003953 | CSAR_peak_ | 6.57            | - |
| chr4 | 10004834 | 10004881 | CSAR_peak_ | 8.39            | - |
| chr4 | 10004942 | 10004962 | CSAR_peak_ | 9.77            | - |
| chr4 | 10005045 | 10005127 | CSAR_peak_ | 38.71,9.41      | - |
| chr4 | 10012997 | 10013114 | CSAR_peak_ | 8.14,12.13,6.-  | - |
| chr4 | 10013208 | 10013304 | CSAR_peak_ | 7.27            | - |
| chr4 | 10013727 | 10013838 | CSAR_peak_ | 16.33,6.81,10.- | - |
| chr4 | 10013928 | 10014042 | CSAR_peak_ | 21.35,31.2      | - |
| chr4 | 10014052 | 10014188 | CSAR_peak_ | 8.14,19.98,10.- | - |
| chr4 | 10014218 | 10014244 | CSAR_peak_ | 10.02           | - |
| chr4 | 10014329 | 10014357 | CSAR_peak_ | 9.77            | - |
| chr4 | 10014465 | 10014540 | CSAR_peak_ | 9.58,21.94      | - |
| chr4 | 10014620 | 10014665 | CSAR_peak_ | 12.94,9.77      | - |
| chr4 | 10014916 | 10014982 | CSAR_peak_ | 7.27            | - |
| chr4 | 10027884 | 10027932 | CSAR_peak_ | 8.39            | - |
| chr4 | 10028105 | 10028136 | CSAR_peak_ | 8.39            | - |
| chr4 | 10028207 | 10028228 | CSAR_peak_ | 7.27            | - |
| chr4 | 10028835 | 10028859 | CSAR_peak_ | 6.21            | - |
| chr4 | 10028880 | 10028963 | CSAR_peak_ | 14.88,7.92      | - |
| chr4 | 10036386 | 10036423 | CSAR_peak_ | 19.36           | - |
| chr4 | 10042305 | 10042361 | CSAR_peak_ | 8.39            | - |
| chr4 | 10042470 | 10042530 | CSAR_peak_ | 6.57            | - |
| chr4 | 10042667 | 10042720 | CSAR_peak_ | 7.27            | - |
| chr4 | 10042830 | 10042913 | CSAR_peak_ | 7.27            | - |

|      |          |          |            |               |   |
|------|----------|----------|------------|---------------|---|
| chr4 | 10043030 | 10043097 | CSAR_peak_ | 17.82,12.13   | - |
| chr4 | 10043175 | 10043223 | CSAR_peak_ | 6.21          | - |
| chr4 | 10043482 | 10043587 | CSAR_peak_ | 9.77          | - |
| chr4 | 10043703 | 10043779 | CSAR_peak_ | 7.27          | - |
| chr4 | 10043799 | 10043865 | CSAR_peak_ | 8.39,12.17    | - |
| chr4 | 10044027 | 10044107 | CSAR_peak_ | 19.98,12.17   | - |
| chr4 | 10044540 | 10044602 | CSAR_peak_ | 10.83,12.13   | - |
| chr4 | 10045240 | 10045311 | CSAR_peak_ | 9.58,14.88    | - |
| chr4 | 10046690 | 10046740 | CSAR_peak_ | 6.03          | - |
| chr4 | 10046814 | 10046896 | CSAR_peak_ | 9.27,19.36    | - |
| chr4 | 10047022 | 10047207 | CSAR_peak_ | 9.58,19.36,1  | - |
| chr4 | 10047305 | 10047371 | CSAR_peak_ | 12.13,8.39    | - |
| chr4 | 10047487 | 10047537 | CSAR_peak_ | 7.27          | - |
| chr4 | 10047639 | 10047721 | CSAR_peak_ | 8.39          | - |
| chr4 | 10048038 | 10048149 | CSAR_peak_ | 10.82,8.65,8. | - |
| chr4 | 10048186 | 10048286 | CSAR_peak_ | 27.64,5.9     | - |
| chr4 | 10048529 | 10048551 | CSAR_peak_ | 8.3           | - |
| chr4 | 10048634 | 10048775 | CSAR_peak_ | 19.36,19.98,1 | - |
| chr4 | 10048860 | 10048945 | CSAR_peak_ | 20.43,30.26   | - |
| chr4 | 10072744 | 10072823 | CSAR_peak_ | 9.58          | - |
| chr4 | 10074424 | 10074497 | CSAR_peak_ | 12.13         | - |
| chr4 | 10076459 | 10076520 | CSAR_peak_ | 9.58,7.27     | - |
| chr4 | 10079188 | 10079234 | CSAR_peak_ | 7.27          | - |
| chr4 | 10094951 | 10095006 | CSAR_peak_ | 9.58          | - |
| chr4 | 10100406 | 10100448 | CSAR_peak_ | 7.27          | - |
| chr4 | 10100767 | 10100814 | CSAR_peak_ | 6.21          | - |
| chr4 | 10130249 | 10130320 | CSAR_peak_ | 12.17         | - |
| chr4 | 10130353 | 10130517 | CSAR_peak_ | 24.21,17.82   | - |
| chr4 | 10130524 | 10130673 | CSAR_peak_ | 13.44,17.82,1 | - |
| chr4 | 10130740 | 10130786 | CSAR_peak_ | 7.27          | - |
| chr4 | 10131101 | 10131164 | CSAR_peak_ | 19.36,6.44    | - |
| chr4 | 10131390 | 10131455 | CSAR_peak_ | 17.82,9.77    | - |
| chr4 | 10131523 | 10131584 | CSAR_peak_ | 13.48         | - |
| chr4 | 10131641 | 10131738 | CSAR_peak_ | 18.61,16.08   | - |
| chr4 | 10147506 | 10147582 | CSAR_peak_ | 5.86,9.58,12. | - |
| chr4 | 10175736 | 10175787 | CSAR_peak_ | 9.58          | - |
| chr4 | 10176468 | 10176524 | CSAR_peak_ | 7.27,6.03     | - |
| chr4 | 10203078 | 10203121 | CSAR_peak_ | 7.27          | - |
| chr4 | 10289267 | 10289415 | CSAR_peak_ | 27.64,12.17   | - |
| chr4 | 10289569 | 10289726 | CSAR_peak_ | 9.77,8.14,10. | - |
| chr4 | 10290117 | 10290171 | CSAR_peak_ | 12.13,9.58    | - |
| chr4 | 10347811 | 10347886 | CSAR_peak_ | 12.13,14.88   | - |

|      |          |          |            |               |   |
|------|----------|----------|------------|---------------|---|
| chr4 | 10348444 | 10348617 | CSAR_peak_ | 18.65,21,9.51 | - |
| chr4 | 10349072 | 10349135 | CSAR_peak_ | 7.27,6.21     | - |
| chr4 | 10389757 | 10389796 | CSAR_peak_ | 6.21          | - |
| chr4 | 10407644 | 10407693 | CSAR_peak_ | 8.39,6.21     | - |
| chr4 | 10407784 | 10407860 | CSAR_peak_ | 7.27,13.51    | - |
| chr4 | 10407931 | 10408027 | CSAR_peak_ | 9.77,13.6,5.8 | - |
| chr4 | 10432001 | 10432071 | CSAR_peak_ | 10.83         | - |
| chr4 | 10432174 | 10432251 | CSAR_peak_ | 5.62,14.88,1  | - |
| chr4 | 10432369 | 10432391 | CSAR_peak_ | 7.58          | - |
| chr4 | 10432428 | 10432479 | CSAR_peak_ | 7.92,6.95     | - |
| chr4 | 10432847 | 10432887 | CSAR_peak_ | 14.88,14.88   | - |
| chr4 | 10432978 | 10433127 | CSAR_peak_ | 16.11,19.36,  | - |
| chr4 | 10433217 | 10433257 | CSAR_peak_ | 31.2,14.88    | - |
| chr4 | 10433336 | 10433408 | CSAR_peak_ | 9.61,17.4     | - |
| chr4 | 10433938 | 10434010 | CSAR_peak_ | 10.02         | - |
| chr4 | 10434102 | 10434163 | CSAR_peak_ | 5.86          | - |
| chr4 | 10434844 | 10434850 | CSAR_peak_ | 10.02         | - |
| chr4 | 10435048 | 10435064 | CSAR_peak_ | 7.27          | - |
| chr4 | 10435497 | 10435567 | CSAR_peak_ | 16.08         | - |
| chr4 | 10435650 | 10435686 | CSAR_peak_ | 6.21          | - |
| chr4 | 10436209 | 10436251 | CSAR_peak_ | 6.21          | - |
| chr4 | 10436450 | 10436503 | CSAR_peak_ | 9.58          | - |
| chr4 | 10436834 | 10436893 | CSAR_peak_ | 17.82,17.82   | - |
| chr4 | 10445363 | 10445446 | CSAR_peak_ | 8.14          | - |
| chr4 | 10445525 | 10445573 | CSAR_peak_ | 7.27          | - |
| chr4 | 10445824 | 10445883 | CSAR_peak_ | 9.58          | - |
| chr4 | 10446095 | 10446140 | CSAR_peak_ | 7.27          | - |
| chr4 | 10446708 | 10446768 | CSAR_peak_ | 9.58          | - |
| chr4 | 10448116 | 10448161 | CSAR_peak_ | 8.65          | - |
| chr4 | 10448325 | 10448386 | CSAR_peak_ | 9.58          | - |
| chr4 | 10449137 | 10449161 | CSAR_peak_ | 7.58          | - |
| chr4 | 10449473 | 10449523 | CSAR_peak_ | 6.21          | - |
| chr4 | 10450445 | 10450491 | CSAR_peak_ | 8.39          | - |
| chr4 | 10453531 | 10453600 | CSAR_peak_ | 9.58          | - |
| chr4 | 10454161 | 10454270 | CSAR_peak_ | 7.27,6.21     | - |
| chr4 | 10454421 | 10454487 | CSAR_peak_ | 12.13,19.36   | - |
| chr4 | 10454729 | 10454800 | CSAR_peak_ | 16.33,14.88   | - |
| chr4 | 10454816 | 10454833 | CSAR_peak_ | 6.21          | - |
| chr4 | 10454894 | 10455032 | CSAR_peak_ | 6.1,31.58,11. | - |
| chr4 | 10455115 | 10455220 | CSAR_peak_ | 36.76,34.84   | - |
| chr4 | 10455295 | 10455367 | CSAR_peak_ | 7.27,19.98    | - |
| chr4 | 10455430 | 10455472 | CSAR_peak_ | 10.83         | - |

|      |          |          |            |               |   |
|------|----------|----------|------------|---------------|---|
| chr4 | 10455528 | 10455583 | CSAR_peak_ | 7.27,12.13    | - |
| chr4 | 10455592 | 10455666 | CSAR_peak_ | 38.71,24.21   | - |
| chr4 | 10455745 | 10455848 | CSAR_peak_ | 23.95,8.52    | - |
| chr4 | 10455931 | 10456027 | CSAR_peak_ | 6.44,5.86,14. | - |
| chr4 | 10456121 | 10456139 | CSAR_peak_ | 8.39          | - |
| chr4 | 10456146 | 10456164 | CSAR_peak_ | 6.02          | - |
| chr4 | 10456281 | 10456334 | CSAR_peak_ | 25.34,7.89    | - |
| chr4 | 10456478 | 10456600 | CSAR_peak_ | 26.37,25.48   | - |
| chr4 | 10456727 | 10456765 | CSAR_peak_ | 7.27          | - |
| chr4 | 10456774 | 10456866 | CSAR_peak_ | 17.82         | - |
| chr4 | 10457127 | 10457196 | CSAR_peak_ | 13.66,9.03,1. | - |
| chr4 | 10457277 | 10457373 | CSAR_peak_ | 10.94,8.14,1. | - |
| chr4 | 10457461 | 10457502 | CSAR_peak_ | 9.58,6.78     | - |
| chr4 | 10457560 | 10457644 | CSAR_peak_ | 13.85,22.58   | - |
| chr4 | 10457911 | 10457938 | CSAR_peak_ | 6.44          | - |
| chr4 | 10458095 | 10458139 | CSAR_peak_ | 8.39          | - |
| chr4 | 10458213 | 10458249 | CSAR_peak_ | 6.21          | - |
| chr4 | 10458297 | 10458434 | CSAR_peak_ | 9.58,10.95    | - |
| chr4 | 10458450 | 10458538 | CSAR_peak_ | 10.7,23.03    | - |
| chr4 | 10458934 | 10458985 | CSAR_peak_ | 6.21          | - |
| chr4 | 10459076 | 10459193 | CSAR_peak_ | 23.03,5.82,2. | - |
| chr4 | 10459256 | 10459318 | CSAR_peak_ | 9.77,7.27     | - |
| chr4 | 10461246 | 10461349 | CSAR_peak_ | 13.48,17.82   | - |
| chr4 | 10461668 | 10461746 | CSAR_peak_ | 7.92,16.33    | - |
| chr4 | 10461918 | 10461966 | CSAR_peak_ | 9.58          | - |
| chr4 | 10462126 | 10462140 | CSAR_peak_ | 7.27          | - |
| chr4 | 10462245 | 10462309 | CSAR_peak_ | 6.21          | - |
| chr4 | 10462790 | 10462839 | CSAR_peak_ | 12.13         | - |
| chr4 | 10464011 | 10464062 | CSAR_peak_ | 7.27          | - |
| chr4 | 10471697 | 10471786 | CSAR_peak_ | 7.27          | - |
| chr4 | 10487867 | 10487916 | CSAR_peak_ | 7.27          | - |
| chr4 | 10562544 | 10562608 | CSAR_peak_ | 7.27,7.27     | - |
| chr4 | 10580489 | 10580540 | CSAR_peak_ | 12.13,6.21    | - |
| chr4 | 10581488 | 10581530 | CSAR_peak_ | 7.27          | - |
| chr4 | 10581660 | 10581730 | CSAR_peak_ | 12.13,9.58    | - |
| chr4 | 10581843 | 10581926 | CSAR_peak_ | 9.79,18.61    | - |
| chr4 | 10582239 | 10582307 | CSAR_peak_ | 17.75,7.51    | - |
| chr4 | 10582380 | 10582526 | CSAR_peak_ | 17.37,6.44,1. | - |
| chr4 | 10582628 | 10582753 | CSAR_peak_ | 19.36,9.58,2. | - |
| chr4 | 10582836 | 10582914 | CSAR_peak_ | 6.44,9.58     | - |
| chr4 | 10582941 | 10583067 | CSAR_peak_ | 15.2,6.81,14. | - |
| chr4 | 10583161 | 10583242 | CSAR_peak_ | 10.83,7.27    | - |

|      |          |          |            |                |   |
|------|----------|----------|------------|----------------|---|
| chr4 | 10583321 | 10583437 | CSAR_peak_ | 19.98,29.4     | - |
| chr4 | 10583597 | 10583688 | CSAR_peak_ | 8.13,19.96,1   | - |
| chr4 | 10583825 | 10583905 | CSAR_peak_ | 22.33,38.89    | - |
| chr4 | 10584027 | 10584091 | CSAR_peak_ | 12.31,14.88,(  | - |
| chr4 | 10584448 | 10584548 | CSAR_peak_ | (14.08,15.68,) | - |
| chr4 | 10584566 | 10584617 | CSAR_peak_ | 12.23          | - |
| chr4 | 10584692 | 10584768 | CSAR_peak_ | 24.52,10.13    | - |
| chr4 | 10587345 | 10587409 | CSAR_peak_ | 10.83          | - |
| chr4 | 10587554 | 10587631 | CSAR_peak_ | 13.48          | - |
| chr4 | 10587863 | 10587884 | CSAR_peak_ | 11.38,7.92     | - |
| chr4 | 10587986 | 10588092 | CSAR_peak_ | 14.88          | - |
| chr4 | 10588211 | 10588306 | CSAR_peak_ | 5.82,18.85     | - |
| chr4 | 10588373 | 10588432 | CSAR_peak_ | 15.96,23.95    | - |
| chr4 | 10588525 | 10588586 | CSAR_peak_ | 31.2,8.39      | - |
| chr4 | 10588681 | 10588755 | CSAR_peak_ | 17.82,17.82    | - |
| chr4 | 10588773 | 10588806 | CSAR_peak_ | 14.76          | - |
| chr4 | 10588906 | 10588968 | CSAR_peak_ | 14.76,6.85,5.  | - |
| chr4 | 10588987 | 10588993 | CSAR_peak_ | 7.92           | - |
| chr4 | 10589040 | 10589158 | CSAR_peak_ | 14.15,16.33    | - |
| chr4 | 10589244 | 10589256 | CSAR_peak_ | 10.83          | - |
| chr4 | 10589290 | 10589346 | CSAR_peak_ | 8.39,10.53     | - |
| chr4 | 10589375 | 10589482 | CSAR_peak_ | (9.55,14.88,1  | - |
| chr4 | 10589532 | 10589594 | CSAR_peak_ | 17.37,6.85     | - |
| chr4 | 10589693 | 10589754 | CSAR_peak_ | 35.97,7.27     | - |
| chr4 | 10590463 | 10590556 | CSAR_peak_ | 18.65,12.17    | - |
| chr4 | 10640545 | 10640706 | CSAR_peak_ | 9.77,6.21,8.3  | - |
| chr4 | 10640784 | 10640841 | CSAR_peak_ | 8.39,6.21      | - |
| chr4 | 10640852 | 10640921 | CSAR_peak_ | 13.48,12.17    | - |
| chr4 | 10641003 | 10641097 | CSAR_peak_ | 14.76          | - |
| chr4 | 10642255 | 10642310 | CSAR_peak_ | 25.62,16.11    | - |
| chr4 | 10642709 | 10642780 | CSAR_peak_ | 20.43,40.72    | - |
| chr4 | 10642955 | 10643005 | CSAR_peak_ | 6.21           | - |
| chr4 | 10644542 | 10644584 | CSAR_peak_ | 6.21           | - |
| chr4 | 10644825 | 10644836 | CSAR_peak_ | 14.88          | - |
| chr4 | 10644948 | 10645045 | CSAR_peak_ | 14.88,14.76    | - |
| chr4 | 10645899 | 10645950 | CSAR_peak_ | 10.83          | - |
| chr4 | 10646631 | 10646755 | CSAR_peak_ | 20.94,10.83,)  | - |
| chr4 | 10647016 | 10647078 | CSAR_peak_ | 9.77,9.58      | - |
| chr4 | 10686633 | 10686741 | CSAR_peak_ | 5.86,9.58      | - |
| chr4 | 10687892 | 10687931 | CSAR_peak_ | 9.58           | - |
| chr4 | 10688393 | 10688435 | CSAR_peak_ | 7              | - |
| chr4 | 10688436 | 10688487 | CSAR_peak_ | 16.08,12.6     | - |

|      |          |          |            |               |   |
|------|----------|----------|------------|---------------|---|
| chr4 | 10688584 | 10688664 | CSAR_peak_ | 12.55,6.74    | - |
| chr4 | 10688840 | 10688906 | CSAR_peak_ | 15.28,9.61    | - |
| chr4 | 10688989 | 10689038 | CSAR_peak_ | 17.4,13.44    | - |
| chr4 | 10689065 | 10689093 | CSAR_peak_ | 7.27          | - |
| chr4 | 10689227 | 10689281 | CSAR_peak_ | 13.48,6.03    | - |
| chr4 | 10689411 | 10689465 | CSAR_peak_ | 33.47,18.1    | - |
| chr4 | 10696369 | 10696445 | CSAR_peak_ | 12.13,7.73    | - |
| chr4 | 10697350 | 10697445 | CSAR_peak_ | 7.27,14.88    | - |
| chr4 | 10699683 | 10699752 | CSAR_peak_ | 12.13         | - |
| chr4 | 10777789 | 10777827 | CSAR_peak_ | 10.83         | - |
| chr4 | 10777830 | 10777878 | CSAR_peak_ | 6.21          | - |
| chr4 | 10777944 | 10777984 | CSAR_peak_ | 9.58          | - |
| chr4 | 10778022 | 10778070 | CSAR_peak_ | 7.34          | - |
| chr4 | 10778182 | 10778198 | CSAR_peak_ | 8.95          | - |
| chr4 | 10778553 | 10778614 | CSAR_peak_ | 9.58,7.27     | - |
| chr4 | 10778763 | 10778846 | CSAR_peak_ | 29.4,15.43    | - |
| chr4 | 10779094 | 10779309 | CSAR_peak_ | 12.6,9.77,6.8 | - |
| chr4 | 10779373 | 10779383 | CSAR_peak_ | 7.58          | - |
| chr4 | 10779401 | 10779524 | CSAR_peak_ | 12.13,21.24,- | - |
| chr4 | 10779586 | 10779623 | CSAR_peak_ | 13.51,10.83   | - |
| chr4 | 10779671 | 10779720 | CSAR_peak_ | 11.07,7.29    | - |
| chr4 | 10779805 | 10779890 | CSAR_peak_ | 20.94,16.33   | - |
| chr4 | 10781076 | 10781128 | CSAR_peak_ | 6.21          | - |
| chr4 | 10781363 | 10781433 | CSAR_peak_ | 6.21          | - |
| chr4 | 10782220 | 10782271 | CSAR_peak_ | 8.39          | - |
| chr4 | 10782317 | 10782371 | CSAR_peak_ | 9.58          | - |
| chr4 | 10785021 | 10785141 | CSAR_peak_ | 8.39          | - |
| chr4 | 10785174 | 10785316 | CSAR_peak_ | 9.58,7,14.85  | - |
| chr4 | 10785350 | 10785485 | CSAR_peak_ | 14.76,12.17   | - |
| chr4 | 10785531 | 10785612 | CSAR_peak_ | 9.97,17.37    | - |
| chr4 | 10785797 | 10785916 | CSAR_peak_ | 9.58,6.21     | - |
| chr4 | 10786014 | 10786032 | CSAR_peak_ | 7.27          | - |
| chr4 | 11015044 | 11015102 | CSAR_peak_ | 7.58,7.27     | - |
| chr4 | 11015374 | 11015421 | CSAR_peak_ | 6.21          | - |
| chr4 | 11015781 | 11015845 | CSAR_peak_ | 8.39          | - |
| chr4 | 11034977 | 11035077 | CSAR_peak_ | 12.13,14.76   | - |
| chr4 | 11035803 | 11035815 | CSAR_peak_ | 9.58          | - |
| chr4 | 11035844 | 11035855 | CSAR_peak_ | 7.27          | - |
| chr4 | 11097265 | 11097317 | CSAR_peak_ | 7.92          | - |
| chr4 | 11133854 | 11133890 | CSAR_peak_ | 6.21          | - |
| chr4 | 11161005 | 11161094 | CSAR_peak_ | 18.61,13.66   | - |
| chr4 | 11161188 | 11161297 | CSAR_peak_ | 23,11.47,7.2  | - |



|      |          |          |            |               |   |
|------|----------|----------|------------|---------------|---|
| chr4 | 11161324 | 11161350 | CSAR_peak_ | 8.2           | - |
| chr4 | 11161568 | 11161601 | CSAR_peak_ | 7.31,6.53     | - |
| chr4 | 11161622 | 11161635 | CSAR_peak_ | 7.47          | - |
| chr4 | 11161746 | 11161845 | CSAR_peak_ | 18.73,12.13   | - |
| chr4 | 11162142 | 11162215 | CSAR_peak_ | 22.56,14.76   | - |
| chr4 | 11162633 | 11162651 | CSAR_peak_ | 7             | - |
| chr4 | 11162940 | 11162980 | CSAR_peak_ | 6.21          | - |
| chr4 | 11163059 | 11163096 | CSAR_peak_ | 6.03          | - |
| chr4 | 11163108 | 11163130 | CSAR_peak_ | 7.27          | - |
| chr4 | 11163224 | 11163324 | CSAR_peak_ | 8.39,10.7     | - |
| chr4 | 11163742 | 11163779 | CSAR_peak_ | 8.39          | - |
| chr4 | 11164069 | 11164115 | CSAR_peak_ | 6.21          | - |
| chr4 | 11164271 | 11164372 | CSAR_peak_ | 28.62,11.75   | - |
| chr4 | 11164458 | 11164618 | CSAR_peak_ | 12.31,15.96,1 | - |
| chr4 | 11165032 | 11165177 | CSAR_peak_ | 19.49,23.89   | - |
| chr4 | 11165308 | 11165438 | CSAR_peak_ | 9.58,16.05,1  | - |
| chr4 | 11166224 | 11166294 | CSAR_peak_ | 12.13         | - |
| chr4 | 11166473 | 11166551 | CSAR_peak_ | 6.21,7.58,11  | - |
| chr4 | 11166624 | 11166686 | CSAR_peak_ | 17.82,13.29   | - |
| chr4 | 11166724 | 11166746 | CSAR_peak_ | 8.65          | - |
| chr4 | 11166847 | 11166883 | CSAR_peak_ | 8.65          | - |
| chr4 | 11166978 | 11167055 | CSAR_peak_ | 14.88,8.39    | - |
| chr4 | 11167216 | 11167317 | CSAR_peak_ | 19.36,8.39    | - |
| chr4 | 11167390 | 11167474 | CSAR_peak_ | 13.85         | - |
| chr4 | 11167708 | 11167831 | CSAR_peak_ | 23.49,7.58    | - |
| chr4 | 11167910 | 11168061 | CSAR_peak_ | 7.92,14.88    | - |
| chr4 | 11168182 | 11168251 | CSAR_peak_ | 7.27,6.85     | - |
| chr4 | 11168255 | 11168325 | CSAR_peak_ | 7.36,11.96    | - |
| chr4 | 11168420 | 11168507 | CSAR_peak_ | 25.91,5.86,8  | - |
| chr4 | 11168610 | 11168691 | CSAR_peak_ | 7.34,6.22,11  | - |
| chr4 | 11168833 | 11168902 | CSAR_peak_ | 14.88         | - |
| chr4 | 11169021 | 11169095 | CSAR_peak_ | 9.58,12.17    | - |
| chr4 | 11169167 | 11169240 | CSAR_peak_ | 25.07,34.89   | - |
| chr4 | 11169242 | 11169255 | CSAR_peak_ | 13.48         | - |
| chr4 | 11169457 | 11169504 | CSAR_peak_ | 27.64,5.95    | - |
| chr4 | 11245520 | 11245645 | CSAR_peak_ | 15.51,6.81,1  | - |
| chr4 | 11310598 | 11310640 | CSAR_peak_ | 8.39          | - |
| chr4 | 11312067 | 11312106 | CSAR_peak_ | 6.21          | - |
| chr4 | 11313367 | 11313420 | CSAR_peak_ | 12.13         | - |
| chr4 | 11399225 | 11399264 | CSAR_peak_ | 6.21          | - |
| chr4 | 11399484 | 11399535 | CSAR_peak_ | 14.88         | - |
| chr4 | 11399612 | 11399688 | CSAR_peak_ | 7.58,22.56    | - |

|      |          |          |            |                |   |
|------|----------|----------|------------|----------------|---|
| chr4 | 11399724 | 11399770 | CSAR_peak_ | 12.13          | - |
| chr4 | 11399838 | 11399980 | CSAR_peak_ | 9.58           | - |
| chr4 | 11400012 | 11400068 | CSAR_peak_ | 10.83,8.39     | - |
| chr4 | 11400287 | 11400320 | CSAR_peak_ | 7.58           | - |
| chr4 | 11400329 | 11400377 | CSAR_peak_ | 15.28          | - |
| chr4 | 11400461 | 11400534 | CSAR_peak_ | 36.24,8.44     | - |
| chr4 | 11400537 | 11400595 | CSAR_peak_ | 6.95,6.57      | - |
| chr4 | 11400707 | 11400723 | CSAR_peak_ | 7.27           | - |
| chr4 | 11400835 | 11400997 | CSAR_peak_ | 14.76,6.57,8.  | - |
| chr4 | 11401051 | 11401131 | CSAR_peak_ | 12.13,8.65     | - |
| chr4 | 11401153 | 11401247 | CSAR_peak_ | 19.36,9.58     | - |
| chr4 | 11401389 | 11401485 | CSAR_peak_ | 20.43,14.76    | - |
| chr4 | 11401693 | 11401754 | CSAR_peak_ | 7.27           | - |
| chr4 | 11402114 | 11402167 | CSAR_peak_ | 20.94          | - |
| chr4 | 11402226 | 11402310 | CSAR_peak_ | 6.21           | - |
| chr4 | 11402334 | 11402413 | CSAR_peak_ | 14.88,12.5     | - |
| chr4 | 11402474 | 11402525 | CSAR_peak_ | 16.33          | - |
| chr4 | 11402533 | 11402599 | CSAR_peak_ | 12.13          | - |
| chr4 | 11402863 | 11403048 | CSAR_peak_ | 9.43,33.75,1!  | - |
| chr4 | 11403065 | 11403243 | CSAR_peak_ | 12.59,49.16,!  | - |
| chr4 | 11403245 | 11403338 | CSAR_peak_ | 12.27,20.43    | - |
| chr4 | 11403417 | 11403461 | CSAR_peak_ | 6.03,9.58      | - |
| chr4 | 11403473 | 11403628 | CSAR_peak_ | 13.37,11.32,!  | - |
| chr4 | 11403712 | 11403792 | CSAR_peak_ | 25.34,13.51,!  | - |
| chr4 | 11403847 | 11403867 | CSAR_peak_ | 14.88,31.2     | - |
| chr4 | 11403954 | 11403999 | CSAR_peak_ | 42.64,19.36    | - |
| chr4 | 11404191 | 11404232 | CSAR_peak_ | 11.14          | - |
| chr4 | 11404241 | 11404290 | CSAR_peak_ | 6.1            | - |
| chr4 | 11404308 | 11404662 | CSAR_peak_ | 8.5,11.14,8.9- | - |
| chr4 | 11404723 | 11404797 | CSAR_peak_ | 17.82,12.74    | - |
| chr4 | 11411864 | 11411911 | CSAR_peak_ | 5.86           | - |
| chr4 | 11467839 | 11467896 | CSAR_peak_ | 8.39,6.21      | - |
| chr4 | 11469238 | 11469303 | CSAR_peak_ | 7.58           | - |
| chr4 | 11469383 | 11469453 | CSAR_peak_ | 9.77,7.27      | - |
| chr4 | 11470011 | 11470093 | CSAR_peak_ | 14.08,8.39     | - |
| chr4 | 11470117 | 11470173 | CSAR_peak_ | 13.48,7.27     | - |
| chr4 | 11470279 | 11470372 | CSAR_peak_ | 13.48,12.13,!  | - |
| chr4 | 11470414 | 11470608 | CSAR_peak_ | 14.88,7,30.0!  | - |
| chr4 | 11470923 | 11470997 | CSAR_peak_ | 23.03,20.94    | - |
| chr4 | 11471014 | 11471059 | CSAR_peak_ | 9.27,7.26      | - |
| chr4 | 11471097 | 11471576 | CSAR_peak_ | 30.72,30.8,4!  | - |
| chr4 | 11471578 | 11471755 | CSAR_peak_ | 34.53,44.58    | - |

|      |          |          |              |                   |
|------|----------|----------|--------------|-------------------|
| chr4 | 11471757 | 11471879 | CSAR_peak_1  | 8.14,14.25,27.13  |
| chr4 | 11471911 | 11472038 | CSAR_peak_2  | 26.69,18.17,12.13 |
| chr4 | 11472042 | 11472485 | CSAR_peak_3  | 14.73,22.52,12.13 |
| chr4 | 11472615 | 11472702 | CSAR_peak_4  | 16.08,37.55       |
| chr4 | 11472736 | 11472811 | CSAR_peak_5  | 32.27,22.56       |
| chr4 | 11506219 | 11506273 | CSAR_peak_6  | 12.13             |
| chr4 | 11506505 | 11506559 | CSAR_peak_7  | 7.27              |
| chr4 | 11506580 | 11506595 | CSAR_peak_8  | 8.39,6.85         |
| chr4 | 11506684 | 11506751 | CSAR_peak_9  | 20.43,8.65,6.85   |
| chr4 | 11506765 | 11506804 | CSAR_peak_10 | 15.2              |
| chr4 | 11506906 | 11506988 | CSAR_peak_11 | 25.48,11.14       |
| chr4 | 11507091 | 11507219 | CSAR_peak_12 | 8.14,8.65         |
| chr4 | 11507398 | 11507448 | CSAR_peak_13 | 8.39              |
| chr4 | 11508216 | 11508226 | CSAR_peak_14 | 6.45              |
| chr4 | 11508309 | 11508349 | CSAR_peak_15 | 14.88             |
| chr4 | 11508354 | 11508370 | CSAR_peak_16 | 8.39              |
| chr4 | 11508633 | 11508677 | CSAR_peak_17 | 17.82             |
| chr4 | 11508839 | 11508904 | CSAR_peak_18 | 8.28              |
| chr4 | 11509065 | 11509094 | CSAR_peak_19 | 9.61              |
| chr4 | 11509179 | 11509239 | CSAR_peak_20 | 12.31,7.27        |
| chr4 | 11509245 | 11509285 | CSAR_peak_21 | 6.03              |
| chr4 | 11536220 | 11536280 | CSAR_peak_22 | 9.58              |
| chr4 | 11536487 | 11536601 | CSAR_peak_23 | 8.39,7.27         |
| chr4 | 11536770 | 11536846 | CSAR_peak_24 | 7.27,5.86         |
| chr4 | 11537043 | 11537068 | CSAR_peak_25 | 7.27              |
| chr4 | 11537151 | 11537195 | CSAR_peak_26 | 8.2               |
| chr4 | 11538502 | 11538562 | CSAR_peak_27 | 9.61,17.82        |
| chr4 | 11538611 | 11538619 | CSAR_peak_28 | 8.39              |
| chr4 | 11538698 | 11538774 | CSAR_peak_29 | 8.65,8.28         |
| chr4 | 11539907 | 11539957 | CSAR_peak_30 | 7.27              |
| chr4 | 11540335 | 11540382 | CSAR_peak_31 | 7.27              |
| chr4 | 11540770 | 11540822 | CSAR_peak_32 | 12.13             |
| chr4 | 11540971 | 11541021 | CSAR_peak_33 | 6.21              |
| chr4 | 11542142 | 11542190 | CSAR_peak_34 | 7.27              |
| chr4 | 11568648 | 11568692 | CSAR_peak_35 | 6.21              |
| chr4 | 11574483 | 11574557 | CSAR_peak_36 | 6.21              |
| chr4 | 11575382 | 11575437 | CSAR_peak_37 | 8.39              |
| chr4 | 11576915 | 11577057 | CSAR_peak_38 | 7.27,25.91        |
| chr4 | 11584746 | 11584791 | CSAR_peak_39 | 9.48              |
| chr4 | 11584870 | 11584921 | CSAR_peak_40 | 6.21              |
| chr4 | 11585010 | 11585101 | CSAR_peak_41 | 12.17,8.14        |
| chr4 | 11585127 | 11585213 | CSAR_peak_42 | 9.55,9.97,5.86    |

|      |          |          |            |                  |   |
|------|----------|----------|------------|------------------|---|
| chr4 | 11591419 | 11591473 | CSAR_peak_ | 9.58             | - |
| chr4 | 11591733 | 11591812 | CSAR_peak_ | 6.21             | - |
| chr4 | 11592009 | 11592107 | CSAR_peak_ | 9.58             | - |
| chr4 | 11603817 | 11603921 | CSAR_peak_ | 13.51,12.31      | - |
| chr4 | 11603980 | 11604034 | CSAR_peak_ | 9.77             | - |
| chr4 | 11604160 | 11604223 | CSAR_peak_ | 9.58             | - |
| chr4 | 11625672 | 11625715 | CSAR_peak_ | 7.27             | - |
| chr4 | 11625867 | 11625907 | CSAR_peak_ | 8.14             | - |
| chr4 | 11625994 | 11626042 | CSAR_peak_ | 17.82            | - |
| chr4 | 11626564 | 11626631 | CSAR_peak_ | 22.56,7.27       | - |
| chr4 | 11626713 | 11626754 | CSAR_peak_ | 12.13            | - |
| chr4 | 11627059 | 11627095 | CSAR_peak_ | 6.21             | - |
| chr4 | 11627511 | 11627549 | CSAR_peak_ | 8.39             | - |
| chr4 | 11629123 | 11629161 | CSAR_peak_ | 9.58             | - |
| chr4 | 11646287 | 11646446 | CSAR_peak_ | 40.72,20.94      | - |
| chr4 | 11646567 | 11646673 | CSAR_peak_ | 18.95,13.48      | - |
| chr4 | 11646864 | 11646906 | CSAR_peak_ | 6.03             | - |
| chr4 | 11646946 | 11647023 | CSAR_peak_ | 18.73,7.27       | - |
| chr4 | 11647599 | 11647635 | CSAR_peak_ | 9.58,6.44        | - |
| chr4 | 11647664 | 11647674 | CSAR_peak_ | 6.05             | - |
| chr4 | 11647775 | 11647964 | CSAR_peak_ | 31.19,9.77,20.94 | - |
| chr4 | 11648085 | 11648110 | CSAR_peak_ | 6.21,12.13       | - |
| chr4 | 11648205 | 11648285 | CSAR_peak_ | 17.52,11.83      | - |
| chr4 | 11657532 | 11657692 | CSAR_peak_ | 13.85,20.94      | - |
| chr4 | 11693698 | 11693779 | CSAR_peak_ | 7.92,10.83       | - |
| chr4 | 11729054 | 11729138 | CSAR_peak_ | 9.58             | - |
| chr4 | 11730134 | 11730193 | CSAR_peak_ | 7.27             | - |
| chr4 | 11731439 | 11731483 | CSAR_peak_ | 6.21             | - |
| chr4 | 11731784 | 11731839 | CSAR_peak_ | 12.13            | - |
| chr4 | 11731935 | 11732002 | CSAR_peak_ | 9.77             | - |
| chr4 | 11732116 | 11732156 | CSAR_peak_ | 9.58             | - |
| chr4 | 11732462 | 11732517 | CSAR_peak_ | 9.58             | - |
| chr4 | 11742324 | 11742429 | CSAR_peak_ | 8.39             | - |
| chr4 | 11742445 | 11742543 | CSAR_peak_ | 7.27             | - |
| chr4 | 11742574 | 11742624 | CSAR_peak_ | 10.83            | - |
| chr4 | 11759474 | 11759547 | CSAR_peak_ | 10.02            | - |
| chr4 | 11766323 | 11766367 | CSAR_peak_ | 6.21             | - |
| chr4 | 11766907 | 11767035 | CSAR_peak_ | 7.27,7.27        | - |
| chr4 | 11770567 | 11770639 | CSAR_peak_ | 7.58             | - |
| chr4 | 11784954 | 11785007 | CSAR_peak_ | 6.21             | - |
| chr4 | 11859380 | 11859455 | CSAR_peak_ | 8.65,8.39        | - |
| chr4 | 11859816 | 11859883 | CSAR_peak_ | 10.83            | - |

|      |          |          |            |               |   |
|------|----------|----------|------------|---------------|---|
| chr4 | 11859980 | 11860028 | CSAR_peak_ | 6.21          | - |
| chr4 | 11860725 | 11860788 | CSAR_peak_ | 17.51,7.73    | - |
| chr4 | 11861394 | 11861534 | CSAR_peak_ | 8.12,24.15,1  | - |
| chr4 | 11861679 | 11861795 | CSAR_peak_ | 13.48,12.17,  | - |
| chr4 | 11862019 | 11862054 | CSAR_peak_ | 9.77          | - |
| chr4 | 11862210 | 11862282 | CSAR_peak_ | 17.82         | - |
| chr4 | 11862551 | 11862633 | CSAR_peak_ | 6.21,23.89    | - |
| chr4 | 11862705 | 11862799 | CSAR_peak_ | 22.56,54.4    | - |
| chr4 | 11862801 | 11862857 | CSAR_peak_ | 9.61,13.51    | - |
| chr4 | 11862899 | 11862969 | CSAR_peak_ | 21.94,12.17   | - |
| chr4 | 11863009 | 11863076 | CSAR_peak_ | 17.52,12.94   | - |
| chr4 | 11863130 | 11863237 | CSAR_peak_ | 19.83,10.82,  | - |
| chr4 | 11863761 | 11863942 | CSAR_peak_ | 27.73,45.61,  | - |
| chr4 | 11876530 | 11876573 | CSAR_peak_ | 10.83         | - |
| chr4 | 11882499 | 11882542 | CSAR_peak_ | 6.81          | - |
| chr4 | 11882649 | 11882729 | CSAR_peak_ | 17.82,12.13   | - |
| chr4 | 11882736 | 11882797 | CSAR_peak_ | 11.07,9.77    | - |
| chr4 | 11884724 | 11884815 | CSAR_peak_ | 24.21,7.92    | - |
| chr4 | 11885179 | 11885252 | CSAR_peak_ | 6.21          | - |
| chr4 | 11893216 | 11893250 | CSAR_peak_ | 7.27          | - |
| chr4 | 11893681 | 11893722 | CSAR_peak_ | 8.39          | - |
| chr4 | 11893769 | 11893821 | CSAR_peak_ | 7.27          | - |
| chr4 | 11893880 | 11893949 | CSAR_peak_ | 28.34,12.74   | - |
| chr4 | 11894013 | 11894060 | CSAR_peak_ | 7.92          | - |
| chr4 | 11894103 | 11894296 | CSAR_peak_ | 8.9,12.59,14. | - |
| chr4 | 11894486 | 11894648 | CSAR_peak_ | 22.58,14.88   | - |
| chr4 | 11894655 | 11894809 | CSAR_peak_ | 7.27,24.15,2  | - |
| chr4 | 11894866 | 11895020 | CSAR_peak_ | 31.2,18.61    | - |
| chr4 | 11895094 | 11895399 | CSAR_peak_ | 35.83,42.64,  | - |
| chr4 | 11895423 | 11895531 | CSAR_peak_ | 14.88,18.95   | - |
| chr4 | 11895573 | 11895732 | CSAR_peak_ | 18.65,12.23,  | - |
| chr4 | 11895871 | 11896123 | CSAR_peak_ | 14.88,12.13,  | - |
| chr4 | 11896430 | 11896470 | CSAR_peak_ | 14.88         | - |
| chr4 | 11949438 | 11949499 | CSAR_peak_ | 9.61          | - |
| chr4 | 11949642 | 11949698 | CSAR_peak_ | 18.73,25.07   | - |
| chr4 | 11949802 | 11949848 | CSAR_peak_ | 7.27,16.33    | - |
| chr4 | 11950552 | 11950587 | CSAR_peak_ | 8.39          | - |
| chr4 | 11950848 | 11950934 | CSAR_peak_ | 16.11         | - |
| chr4 | 11952376 | 11952488 | CSAR_peak_ | 8.28,10.83,1  | - |
| chr4 | 11952668 | 11952830 | CSAR_peak_ | 9.58,16.33,1  | - |
| chr4 | 11952977 | 11953021 | CSAR_peak_ | 6.21          | - |
| chr4 | 11953542 | 11953601 | CSAR_peak_ | 9.77,12.13    | - |

|      |          |          |            |                |   |
|------|----------|----------|------------|----------------|---|
| chr4 | 11965197 | 11965247 | CSAR_peak_ | 7.27           | - |
| chr4 | 11968465 | 11968559 | CSAR_peak_ | 7.27,9.58      | - |
| chr4 | 11968792 | 11968844 | CSAR_peak_ | 6.02           | - |
| chr4 | 11968886 | 11969029 | CSAR_peak_ | 12.74,17.4     | - |
| chr4 | 11969078 | 11969106 | CSAR_peak_ | 8.39,6.21      | - |
| chr4 | 11969176 | 11969244 | CSAR_peak_ | 29.4,11.03,6.  | - |
| chr4 | 11969335 | 11969424 | CSAR_peak_ | 17.37,14.88    | - |
| chr4 | 11969439 | 11969756 | CSAR_peak_ | 24.52,19.36,,- | - |
| chr4 | 11969798 | 11969848 | CSAR_peak_ | 13.48          | - |
| chr4 | 11969932 | 11970000 | CSAR_peak_ | 31.2,8.52      | - |
| chr4 | 11970090 | 11970215 | CSAR_peak_ | 10.83,14.76    | - |
| chr4 | 11970321 | 11970390 | CSAR_peak_ | 17.82,14.85    | - |
| chr4 | 11970886 | 11971021 | CSAR_peak_ | 22.69,23.42,(- | - |
| chr4 | 11971078 | 11971115 | CSAR_peak_ | 6.21           | - |
| chr4 | 11987768 | 11987815 | CSAR_peak_ | 6.21           | - |
| chr4 | 11987887 | 11988006 | CSAR_peak_ | 7.27,29.2      | - |
| chr4 | 11988388 | 11988444 | CSAR_peak_ | 9.58           | - |
| chr4 | 12044106 | 12044177 | CSAR_peak_ | 6.81           | - |
| chr4 | 12049355 | 12049403 | CSAR_peak_ | 6.21           | - |
| chr4 | 12049583 | 12049627 | CSAR_peak_ | 7.27           | - |
| chr4 | 12049882 | 12049938 | CSAR_peak_ | 8.39           | - |
| chr4 | 12050932 | 12050993 | CSAR_peak_ | 13.48,9.58     | - |
| chr4 | 12051354 | 12051394 | CSAR_peak_ | 12.13,6.81,9.- | - |
| chr4 | 12060330 | 12060381 | CSAR_peak_ | 5.86           | - |
| chr4 | 12060385 | 12060446 | CSAR_peak_ | 8.39           | - |
| chr4 | 12061161 | 12061202 | CSAR_peak_ | 5.86           | - |
| chr4 | 12076333 | 12076423 | CSAR_peak_ | 5.86           | - |
| chr4 | 12076439 | 12076485 | CSAR_peak_ | 9.58           | - |
| chr4 | 12103369 | 12103484 | CSAR_peak_ | 26.69,8.52     | - |
| chr4 | 12103499 | 12103547 | CSAR_peak_ | 8.9            | - |
| chr4 | 12103631 | 12103718 | CSAR_peak_ | 8.5,12.68      | - |
| chr4 | 12103796 | 12103877 | CSAR_peak_ | 17.87,10.53    | - |
| chr4 | 12103946 | 12104063 | CSAR_peak_ | 8.18,10.83     | - |
| chr4 | 12104167 | 12104220 | CSAR_peak_ | 8.3            | - |
| chr4 | 12104239 | 12104267 | CSAR_peak_ | 10.83          | - |
| chr4 | 12104333 | 12104439 | CSAR_peak_ | 18.95,19.36    | - |
| chr4 | 12104545 | 12104603 | CSAR_peak_ | 9.32,28.34     | - |
| chr4 | 12104893 | 12104974 | CSAR_peak_ | 13.7,17.28     | - |
| chr4 | 12105046 | 12105089 | CSAR_peak_ | 13.29,12.13    | - |
| chr4 | 12105207 | 12105276 | CSAR_peak_ | 10.82,22.74,,- | - |
| chr4 | 12105395 | 12105554 | CSAR_peak_ | 9.32,19.26     | - |
| chr4 | 12105658 | 12105751 | CSAR_peak_ | 8.65,13.48,1!- | - |

|      |          |          |            |                   |   |
|------|----------|----------|------------|-------------------|---|
| chr4 | 12105828 | 12105888 | CSAR_peak_ | 10.02,17.82       | - |
| chr4 | 12105893 | 12105976 | CSAR_peak_ | 6.45,9.58         | - |
| chr4 | 12106105 | 12106125 | CSAR_peak_ | 14.63             | - |
| chr4 | 12106219 | 12106256 | CSAR_peak_ | 14.88,8.39        | - |
| chr4 | 12106411 | 12106501 | CSAR_peak_ | 14.88,9.58        | - |
| chr4 | 12106674 | 12106706 | CSAR_peak_ | 10.53             | - |
| chr4 | 12141574 | 12141645 | CSAR_peak_ | 14.88,8.65        | - |
| chr4 | 12141804 | 12141888 | CSAR_peak_ | 26.55,12.13       | - |
| chr4 | 12142239 | 12142326 | CSAR_peak_ | 9.58,30.02        | - |
| chr4 | 12142867 | 12142917 | CSAR_peak_ | 9.58              | - |
| chr4 | 12155516 | 12155555 | CSAR_peak_ | 7.27              | - |
| chr4 | 12164863 | 12164926 | CSAR_peak_ | 6.21              | - |
| chr4 | 12165118 | 12165222 | CSAR_peak_ | 7.27,7.58         | - |
| chr4 | 12165259 | 12165345 | CSAR_peak_ | 12.17,12.17       | - |
| chr4 | 12168162 | 12168222 | CSAR_peak_ | 9.61              | - |
| chr4 | 12168338 | 12168400 | CSAR_peak_ | 10.02,9.58        | - |
| chr4 | 12168611 | 12168700 | CSAR_peak_ | 29.52,9.48        | - |
| chr4 | 12168770 | 12168871 | CSAR_peak_ | 8.52,9.77         | - |
| chr4 | 12169414 | 12169491 | CSAR_peak_ | 19.36             | - |
| chr4 | 12241045 | 12241117 | CSAR_peak_ | 7.29              | - |
| chr4 | 12241327 | 12241355 | CSAR_peak_ | 8.39              | - |
| chr4 | 12243528 | 12243587 | CSAR_peak_ | 9.58              | - |
| chr4 | 12244127 | 12244202 | CSAR_peak_ | 17.82,13.29       | - |
| chr4 | 12244500 | 12244509 | CSAR_peak_ | 6.57              | - |
| chr4 | 12244518 | 12244552 | CSAR_peak_ | 7.27              | - |
| chr4 | 12244887 | 12244958 | CSAR_peak_ | 12.13             | - |
| chr4 | 12245135 | 12245182 | CSAR_peak_ | 8.39              | - |
| chr4 | 12245607 | 12245655 | CSAR_peak_ | 8.39              | - |
| chr4 | 12245889 | 12246012 | CSAR_peak_ | 6.02,13.66,14.63  | - |
| chr4 | 12246085 | 12246157 | CSAR_peak_ | 17.37,8.65,7.27   | - |
| chr4 | 12246294 | 12246435 | CSAR_peak_ | 12.13,9.58,6.21   | - |
| chr4 | 12246527 | 12246610 | CSAR_peak_ | 8.95,9.58         | - |
| chr4 | 12247596 | 12247659 | CSAR_peak_ | 6.87,6.85         | - |
| chr4 | 12247706 | 12247730 | CSAR_peak_ | 9.58              | - |
| chr4 | 12247936 | 12247986 | CSAR_peak_ | 8.39              | - |
| chr4 | 12248221 | 12248282 | CSAR_peak_ | 16.33             | - |
| chr4 | 12322873 | 12322911 | CSAR_peak_ | 7.27              | - |
| chr4 | 12324950 | 12325065 | CSAR_peak_ | 14.63,32.25,14.63 | - |
| chr4 | 12325104 | 12325250 | CSAR_peak_ | 20.18,19.98       | - |
| chr4 | 12325337 | 12325441 | CSAR_peak_ | 25.1,27.93        | - |
| chr4 | 12325469 | 12325641 | CSAR_peak_ | 6.81,22.52,14.63  | - |
| chr4 | 12325652 | 12325701 | CSAR_peak_ | 14.88,8.13        | - |

|      |          |          |            |                |
|------|----------|----------|------------|----------------|
| chr4 | 12325802 | 12325948 | CSAR_peak_ | 24.21,21.53,;- |
| chr4 | 12326003 | 12326086 | CSAR_peak_ | 31.48,15 -     |
| chr4 | 12326118 | 12326420 | CSAR_peak_ | 29.4,6.57,38.- |
| chr4 | 12326489 | 12326539 | CSAR_peak_ | 14.76 -        |
| chr4 | 12326558 | 12326665 | CSAR_peak_ | 12.13,12.13 -  |
| chr4 | 12326713 | 12326791 | CSAR_peak_ | 19.98 -        |
| chr4 | 12326818 | 12326885 | CSAR_peak_ | 12.17 -        |
| chr4 | 12327006 | 12327079 | CSAR_peak_ | 18.73,10.31 -  |
| chr4 | 12327211 | 12327246 | CSAR_peak_ | 7.27 -         |
| chr4 | 12327393 | 12327443 | CSAR_peak_ | 6.21,6.57 -    |
| chr4 | 12329577 | 12329658 | CSAR_peak_ | 7.27,6.21 -    |
| chr4 | 12332699 | 12332811 | CSAR_peak_ | 16.08,17.82 -  |
| chr4 | 12332866 | 12332979 | CSAR_peak_ | 17.82 -        |
| chr4 | 12333011 | 12333076 | CSAR_peak_ | 16.37,15.04 -  |
| chr4 | 12333097 | 12333231 | CSAR_peak_ | 6.53,33.47,2(- |
| chr4 | 12333458 | 12333656 | CSAR_peak_ | 24.21,7.68,7.- |
| chr4 | 12333679 | 12333703 | CSAR_peak_ | 10.52 -        |
| chr4 | 12336569 | 12336609 | CSAR_peak_ | 8.13 -         |
| chr4 | 12337347 | 12337458 | CSAR_peak_ | 12.13,8.65 -   |
| chr4 | 12397557 | 12397627 | CSAR_peak_ | 12.13,17.82 -  |
| chr4 | 12398333 | 12398360 | CSAR_peak_ | 10.83 -        |
| chr4 | 12399896 | 12399949 | CSAR_peak_ | 12.17 -        |
| chr4 | 12401617 | 12401676 | CSAR_peak_ | 12.13 -        |
| chr4 | 12402527 | 12402612 | CSAR_peak_ | 10.83 -        |
| chr4 | 12403100 | 12403142 | CSAR_peak_ | 7.27 -         |
| chr4 | 12403736 | 12403777 | CSAR_peak_ | 7.73 -         |
| chr4 | 12403864 | 12403943 | CSAR_peak_ | 14.88,10.95 -  |
| chr4 | 12403968 | 12403984 | CSAR_peak_ | 13.44 -        |
| chr4 | 12404082 | 12404220 | CSAR_peak_ | 10.95,16.92,;- |
| chr4 | 12404231 | 12404275 | CSAR_peak_ | 17.82,7.27 -   |
| chr4 | 12404362 | 12404502 | CSAR_peak_ | 19.36,6.72,1(- |
| chr4 | 12404586 | 12404786 | CSAR_peak_ | 11.96,22.69,;- |
| chr4 | 12404827 | 12404931 | CSAR_peak_ | 9.41,6.21,9.5- |
| chr4 | 12404940 | 12405011 | CSAR_peak_ | 25.91,13.48 -  |
| chr4 | 12405070 | 12405242 | CSAR_peak_ | 25.62,14.76,;- |
| chr4 | 12405339 | 12405395 | CSAR_peak_ | 12.6 -         |
| chr4 | 12405473 | 12405540 | CSAR_peak_ | 11.38 -        |
| chr4 | 12405913 | 12406023 | CSAR_peak_ | 16.11,8.65 -   |
| chr4 | 12406047 | 12406152 | CSAR_peak_ | 7.77,6.07,13.- |
| chr4 | 12406308 | 12406476 | CSAR_peak_ | 17.42,13.33 -  |
| chr4 | 12406583 | 12406709 | CSAR_peak_ | 9.41,20.54 -   |
| chr4 | 12406744 | 12406811 | CSAR_peak_ | 7.92,20.94 -   |



|      |          |          |            |                |
|------|----------|----------|------------|----------------|
| chr4 | 12406906 | 12407019 | CSAR_peak_ | 10.02,26.69,-  |
| chr4 | 12407138 | 12407243 | CSAR_peak_ | 9.58,8.14,12.- |
| chr4 | 12407271 | 12407320 | CSAR_peak_ | 11.8,13.51 -   |
| chr4 | 12407437 | 12407536 | CSAR_peak_ | 31.48,32.25 -  |
| chr4 | 12407599 | 12407679 | CSAR_peak_ | 30.81,24.17 -  |
| chr4 | 12408090 | 12408197 | CSAR_peak_ | 24.17,35.7 -   |
| chr4 | 12408221 | 12408253 | CSAR_peak_ | 14.88 -        |
| chr4 | 12416163 | 12416222 | CSAR_peak_ | 7.27 -         |
| chr4 | 12421040 | 12421144 | CSAR_peak_ | 12.31 -        |
| chr4 | 12470083 | 12470180 | CSAR_peak_ | 19.36,8.14,8.- |
| chr4 | 12470692 | 12470831 | CSAR_peak_ | 13.48,7.58 -   |
| chr4 | 12552270 | 12552310 | CSAR_peak_ | 9.58 -         |
| chr4 | 12552987 | 12553052 | CSAR_peak_ | 20.94,8.09 -   |
| chr4 | 12553254 | 12553279 | CSAR_peak_ | 9.48 -         |
| chr4 | 12553842 | 12553887 | CSAR_peak_ | 7.27 -         |
| chr4 | 12554433 | 12554572 | CSAR_peak_ | 19.36,12.13 -  |
| chr4 | 12555155 | 12555203 | CSAR_peak_ | 7.27 -         |
| chr4 | 12555563 | 12555625 | CSAR_peak_ | 10.02 -        |
| chr4 | 12555842 | 12555907 | CSAR_peak_ | 9.61,14.88 -   |
| chr4 | 12556838 | 12556899 | CSAR_peak_ | 19.36 -        |
| chr4 | 12556992 | 12557052 | CSAR_peak_ | 8.39,6.21 -    |
| chr4 | 12558664 | 12558714 | CSAR_peak_ | 7.27 -         |
| chr4 | 12559495 | 12559559 | CSAR_peak_ | 9.58 -         |
| chr4 | 12565680 | 12565732 | CSAR_peak_ | 9.58 -         |
| chr4 | 12566953 | 12567012 | CSAR_peak_ | 21.94,10.83 -  |
| chr4 | 12567064 | 12567153 | CSAR_peak_ | 7.27,12.13,6.- |
| chr4 | 12567291 | 12567497 | CSAR_peak_ | 17.82,5.86,7.- |
| chr4 | 12567510 | 12567585 | CSAR_peak_ | 24.52,12.13 -  |
| chr4 | 12567619 | 12567668 | CSAR_peak_ | 10.83 -        |
| chr4 | 12567895 | 12568068 | CSAR_peak_ | 28.34,25.1 -   |
| chr4 | 12568096 | 12568170 | CSAR_peak_ | 8.12,8.18,6.7- |
| chr4 | 12568173 | 12568244 | CSAR_peak_ | 6.51,14.12 -   |
| chr4 | 12568270 | 12568319 | CSAR_peak_ | 12.17 -        |
| chr4 | 12568413 | 12568698 | CSAR_peak_ | 43.44,41.63,-  |
| chr4 | 12583816 | 12583861 | CSAR_peak_ | 6.21 -         |
| chr4 | 12586064 | 12586114 | CSAR_peak_ | 6.21 -         |
| chr4 | 12603840 | 12603886 | CSAR_peak_ | 7.27 -         |
| chr4 | 12604023 | 12604090 | CSAR_peak_ | 7.34 -         |
| chr4 | 12605230 | 12605277 | CSAR_peak_ | 7.27 -         |
| chr4 | 12605341 | 12605404 | CSAR_peak_ | 14.88 -        |
| chr4 | 12614626 | 12614675 | CSAR_peak_ | 7.27 -         |
| chr4 | 12663048 | 12663102 | CSAR_peak_ | 7.27,10.83 -   |

|      |          |          |            |                |   |
|------|----------|----------|------------|----------------|---|
| chr4 | 12663429 | 12663480 | CSAR_peak_ | 5.86           | - |
| chr4 | 12663516 | 12663552 | CSAR_peak_ | 8.39           | - |
| chr4 | 12663685 | 12663739 | CSAR_peak_ | 6.02           | - |
| chr4 | 12664248 | 12664288 | CSAR_peak_ | 7.58           | - |
| chr4 | 12664382 | 12664426 | CSAR_peak_ | 12.17          | - |
| chr4 | 12664699 | 12664778 | CSAR_peak_ | 18.95,9.58     | - |
| chr4 | 12665192 | 12665268 | CSAR_peak_ | 12.17,8.39     | - |
| chr4 | 12665749 | 12665804 | CSAR_peak_ | 9.77,8.65      | - |
| chr4 | 12665910 | 12665965 | CSAR_peak_ | 14.88,9.58     | - |
| chr4 | 12665996 | 12666049 | CSAR_peak_ | 6.21,25.91     | - |
| chr4 | 12666114 | 12666141 | CSAR_peak_ | 9.58           | - |
| chr4 | 12666142 | 12666198 | CSAR_peak_ | 10.02,16.87    | - |
| chr4 | 12666282 | 12666340 | CSAR_peak_ | 21.94          | - |
| chr4 | 12666427 | 12666453 | CSAR_peak_ | 10.31          | - |
| chr4 | 12666764 | 12666807 | CSAR_peak_ | 12.13          | - |
| chr4 | 12666809 | 12666823 | CSAR_peak_ | 6.57           | - |
| chr4 | 12666825 | 12666867 | CSAR_peak_ | 6.64           | - |
| chr4 | 12666923 | 12666982 | CSAR_peak_ | 7.73,13.48     | - |
| chr4 | 12681405 | 12681541 | CSAR_peak_ | 8.95,22.74,7.  | - |
| chr4 | 12682558 | 12682607 | CSAR_peak_ | 6.21           | - |
| chr4 | 12709193 | 12709260 | CSAR_peak_ | 12.13          | - |
| chr4 | 12710004 | 12710069 | CSAR_peak_ | 7.27           | - |
| chr4 | 12710306 | 12710379 | CSAR_peak_ | 10.02,8.39     | - |
| chr4 | 12710907 | 12711020 | CSAR_peak_ | 16.11,16.08    | - |
| chr4 | 12754663 | 12754747 | CSAR_peak_ | 11.07,18.61    | - |
| chr4 | 12754763 | 12754867 | CSAR_peak_ | 18.65,10.95    | - |
| chr4 | 12754877 | 12754948 | CSAR_peak_ | 6.21           | - |
| chr4 | 12754958 | 12755123 | CSAR_peak_ | 20.88,21.37    | - |
| chr4 | 12755142 | 12755197 | CSAR_peak_ | 9.27,8.95      | - |
| chr4 | 12755200 | 12755409 | CSAR_peak_ | 20.94,12.31    | - |
| chr4 | 12755455 | 12755527 | CSAR_peak_ | 13.66,15.43    | - |
| chr4 | 12755567 | 12755606 | CSAR_peak_ | 6.21,7.27      | - |
| chr4 | 12755683 | 12755793 | CSAR_peak_ | 16.33,13.92    | - |
| chr4 | 12755932 | 12755970 | CSAR_peak_ | 9.58           | - |
| chr4 | 12756007 | 12756050 | CSAR_peak_ | 7.27,6.21      | - |
| chr4 | 12756145 | 12756209 | CSAR_peak_ | 24.21,11.38    | - |
| chr4 | 12756294 | 12756376 | CSAR_peak_ | 14.34,15.2     | - |
| chr4 | 12756446 | 12756471 | CSAR_peak_ | 6.94           | - |
| chr4 | 12756750 | 12756817 | CSAR_peak_ | 24.17,16.34    | - |
| chr4 | 12756867 | 12757130 | CSAR_peak_ | 33.03,7.58,1(- | - |
| chr4 | 12757552 | 12757670 | CSAR_peak_ | 9.58,12.13     | - |
| chr4 | 12759032 | 12759104 | CSAR_peak_ | 7.36,5.62      | - |

|      |          |          |            |               |   |
|------|----------|----------|------------|---------------|---|
| chr4 | 12759405 | 12759438 | CSAR_peak_ | 6.21          | - |
| chr4 | 12759839 | 12759909 | CSAR_peak_ | 10.83,8.39    | - |
| chr4 | 12760403 | 12760471 | CSAR_peak_ | 9.58,14.88    | - |
| chr4 | 12766244 | 12766289 | CSAR_peak_ | 7.58          | - |
| chr4 | 12767003 | 12767040 | CSAR_peak_ | 6.21          | - |
| chr4 | 12767413 | 12767451 | CSAR_peak_ | 9.58          | - |
| chr4 | 12786934 | 12786959 | CSAR_peak_ | 9.58          | - |
| chr4 | 12789334 | 12789381 | CSAR_peak_ | 9.58          | - |
| chr4 | 12789472 | 12789601 | CSAR_peak_ | 7.27,10.83    | - |
| chr4 | 12790789 | 12790826 | CSAR_peak_ | 7.27          | - |
| chr4 | 12791280 | 12791320 | CSAR_peak_ | 12.13         | - |
| chr4 | 12791452 | 12791500 | CSAR_peak_ | 5.86          | - |
| chr4 | 12791656 | 12791690 | CSAR_peak_ | 9.58          | - |
| chr4 | 12791703 | 12791741 | CSAR_peak_ | 14.88         | - |
| chr4 | 12791814 | 12791859 | CSAR_peak_ | 12.13         | - |
| chr4 | 12791878 | 12791905 | CSAR_peak_ | 6.81          | - |
| chr4 | 12792248 | 12792339 | CSAR_peak_ | 8.52,12.17    | - |
| chr4 | 12792567 | 12792581 | CSAR_peak_ | 6.44          | - |
| chr4 | 12794290 | 12794342 | CSAR_peak_ | 8.39          | - |
| chr4 | 12796895 | 12796930 | CSAR_peak_ | 6.21          | - |
| chr4 | 12797402 | 12797418 | CSAR_peak_ | 6.21          | - |
| chr4 | 12797607 | 12797639 | CSAR_peak_ | 7.27          | - |
| chr4 | 12820316 | 12820398 | CSAR_peak_ | 14.88         | - |
| chr4 | 12850725 | 12850868 | CSAR_peak_ | 9.32,5.86,6.0 | - |
| chr4 | 12851200 | 12851237 | CSAR_peak_ | 9.58          | - |
| chr4 | 12851321 | 12851341 | CSAR_peak_ | 7.27          | - |
| chr4 | 12878991 | 12879033 | CSAR_peak_ | 6.21          | - |
| chr4 | 12879529 | 12879753 | CSAR_peak_ | 23.49,44.77,  | - |
| chr4 | 12880893 | 12880930 | CSAR_peak_ | 8.14          | - |
| chr4 | 12880940 | 12880971 | CSAR_peak_ | 8.39,8.28     | - |
| chr4 | 12881231 | 12881308 | CSAR_peak_ | 7.58,8.3      | - |
| chr4 | 12881363 | 12881411 | CSAR_peak_ | 19.36,13.48   | - |
| chr4 | 12882233 | 12882292 | CSAR_peak_ | 9.77,6.44     | - |
| chr4 | 12882333 | 12882345 | CSAR_peak_ | 9.58          | - |
| chr4 | 12882436 | 12882457 | CSAR_peak_ | 10.83         | - |
| chr4 | 12883006 | 12883125 | CSAR_peak_ | 20.18,10.33   | - |
| chr4 | 12883197 | 12883333 | CSAR_peak_ | 26.43,5.95,1  | - |
| chr4 | 12883352 | 12883478 | CSAR_peak_ | 12.31,7,8.53  | - |
| chr4 | 12883491 | 12883532 | CSAR_peak_ | 6.21          | - |
| chr4 | 12883582 | 12883624 | CSAR_peak_ | 6.95,10.62    | - |
| chr4 | 12884017 | 12884095 | CSAR_peak_ | 7.27,6.21     | - |
| chr4 | 12884185 | 12884223 | CSAR_peak_ | 6.03          | - |

|      |          |          |            |                   |   |
|------|----------|----------|------------|-------------------|---|
| chr4 | 12884667 | 12884769 | CSAR_peak_ | 11.38,8.28        | - |
| chr4 | 12884997 | 12885156 | CSAR_peak_ | 14.22,6.21,11.38  | - |
| chr4 | 12885231 | 12885304 | CSAR_peak_ | 13.44,23.03       | - |
| chr4 | 12885334 | 12885459 | CSAR_peak_ | 6.57,15.28        | - |
| chr4 | 12885490 | 12885509 | CSAR_peak_ | 13.48             | - |
| chr4 | 12885597 | 12885713 | CSAR_peak_ | 26.54,24.72       | - |
| chr4 | 12885717 | 12885775 | CSAR_peak_ | 16.33             | - |
| chr4 | 12886091 | 12886176 | CSAR_peak_ | 19.36             | - |
| chr4 | 12886442 | 12886517 | CSAR_peak_ | 5.95,12.74        | - |
| chr4 | 12886718 | 12886742 | CSAR_peak_ | 8.39              | - |
| chr4 | 12899577 | 12899618 | CSAR_peak_ | 7.58              | - |
| chr4 | 12913085 | 12913135 | CSAR_peak_ | 14.88             | - |
| chr4 | 12936277 | 12936326 | CSAR_peak_ | 8.28              | - |
| chr4 | 12937590 | 12937630 | CSAR_peak_ | 7.27              | - |
| chr4 | 12940014 | 12940091 | CSAR_peak_ | 6.85,8.39,6.21    | - |
| chr4 | 12940395 | 12940432 | CSAR_peak_ | 13.48             | - |
| chr4 | 12940509 | 12940550 | CSAR_peak_ | 6.21,6.57         | - |
| chr4 | 12941753 | 12941797 | CSAR_peak_ | 7.27              | - |
| chr4 | 13006498 | 13006555 | CSAR_peak_ | 7.58              | - |
| chr4 | 13006830 | 13006897 | CSAR_peak_ | 12.13             | - |
| chr4 | 13006991 | 13007058 | CSAR_peak_ | 9.77              | - |
| chr4 | 13007207 | 13007273 | CSAR_peak_ | 6.21,7.27         | - |
| chr4 | 13007423 | 13007496 | CSAR_peak_ | 8.14,10.83        | - |
| chr4 | 13007522 | 13007593 | CSAR_peak_ | 7.92,7.27         | - |
| chr4 | 13007616 | 13007726 | CSAR_peak_ | 17.82,9.58        | - |
| chr4 | 13007895 | 13007960 | CSAR_peak_ | 14.88             | - |
| chr4 | 13008015 | 13008065 | CSAR_peak_ | 8.39              | - |
| chr4 | 13008186 | 13008395 | CSAR_peak_ | 16.34,20.94       | - |
| chr4 | 13008535 | 13008601 | CSAR_peak_ | 7.27,15.76,11.38  | - |
| chr4 | 13008618 | 13008665 | CSAR_peak_ | 12.13             | - |
| chr4 | 13008733 | 13008847 | CSAR_peak_ | 14.85,22.71,11.38 | - |
| chr4 | 13008884 | 13009167 | CSAR_peak_ | 28.93,20.13,11.38 | - |
| chr4 | 13009272 | 13009494 | CSAR_peak_ | 22.56,12.59,11.38 | - |
| chr4 | 13009516 | 13009552 | CSAR_peak_ | 9.58              | - |
| chr4 | 13009603 | 13009655 | CSAR_peak_ | 14.88,7.27        | - |
| chr4 | 13009680 | 13009736 | CSAR_peak_ | 17.82             | - |
| chr4 | 13009760 | 13009805 | CSAR_peak_ | 18.95             | - |
| chr4 | 13009853 | 13009992 | CSAR_peak_ | 12.49,62          | - |
| chr4 | 13010231 | 13010394 | CSAR_peak_ | 13.85,6.02,11.38  | - |
| chr4 | 13010517 | 13010522 | CSAR_peak_ | 6.85              | - |
| chr4 | 13010599 | 13010678 | CSAR_peak_ | 16.05,7.68        | - |
| chr4 | 13010708 | 13010790 | CSAR_peak_ | 20.18,5.86,20.94  | - |

|      |          |          |            |               |   |
|------|----------|----------|------------|---------------|---|
| chr4 | 13010816 | 13010839 | CSAR_peak_ | 16.34         | - |
| chr4 | 13010932 | 13011099 | CSAR_peak_ | 14.12,23.03,  | - |
| chr4 | 13011166 | 13011515 | CSAR_peak_ | 24.21,29.4,1, | - |
| chr4 | 13011519 | 13011640 | CSAR_peak_ | 12.59,25.62,  | - |
| chr4 | 13011774 | 13011858 | CSAR_peak_ | 12.13         | - |
| chr4 | 13011991 | 13012028 | CSAR_peak_ | 9.58          | - |
| chr4 | 13012180 | 13012242 | CSAR_peak_ | 16.92,29.2    | - |
| chr4 | 13012260 | 13012339 | CSAR_peak_ | 7.27          | - |
| chr4 | 13012342 | 13012462 | CSAR_peak_ | 44.69,28.94   | - |
| chr4 | 13012555 | 13012729 | CSAR_peak_ | 8.95,16.33,1, | - |
| chr4 | 13012824 | 13013019 | CSAR_peak_ | 27.64,12.94   | - |
| chr4 | 13013033 | 13013042 | CSAR_peak_ | 12.31         | - |
| chr4 | 13013046 | 13013057 | CSAR_peak_ | 6.03          | - |
| chr4 | 13013083 | 13013292 | CSAR_peak_ | 14.92,13.48,  | - |
| chr4 | 13013303 | 13013395 | CSAR_peak_ | 13.48,7.27    | - |
| chr4 | 13013522 | 13013557 | CSAR_peak_ | 7.92          | - |
| chr4 | 13013628 | 13013764 | CSAR_peak_ | 14.76         | - |
| chr4 | 13014317 | 13014390 | CSAR_peak_ | 12.13         | - |
| chr4 | 13014412 | 13014465 | CSAR_peak_ | 9.58          | - |
| chr4 | 13014504 | 13014585 | CSAR_peak_ | 10.33,22.83   | - |
| chr4 | 13014620 | 13014740 | CSAR_peak_ | 17.82,20.94   | - |
| chr4 | 13014833 | 13014893 | CSAR_peak_ | 12.17,14.88   | - |
| chr4 | 13015088 | 13015122 | CSAR_peak_ | 6.21          | - |
| chr4 | 13015158 | 13015243 | CSAR_peak_ | 6.78,19.36    | - |
| chr4 | 13015269 | 13015366 | CSAR_peak_ | 50.81,45.52   | - |
| chr4 | 13015429 | 13015820 | CSAR_peak_ | 38.8,38.5,14. | - |
| chr4 | 13015846 | 13015882 | CSAR_peak_ | 12.14         | - |
| chr4 | 13015941 | 13015992 | CSAR_peak_ | 15.56         | - |
| chr4 | 13016017 | 13016070 | CSAR_peak_ | 11.14         | - |
| chr4 | 13016143 | 13016230 | CSAR_peak_ | 17.82,10.83   | - |
| chr4 | 13017757 | 13017832 | CSAR_peak_ | 9.58          | - |
| chr4 | 13018198 | 13018287 | CSAR_peak_ | 12.17,12.31   | - |
| chr4 | 13018354 | 13018548 | CSAR_peak_ | 14.88,17.4,1, | - |
| chr4 | 13018552 | 13018679 | CSAR_peak_ | 5.89,14.51,2, | - |
| chr4 | 13018746 | 13018932 | CSAR_peak_ | 35.83,14.76   | - |
| chr4 | 13019076 | 13019139 | CSAR_peak_ | 17.82         | - |
| chr4 | 13020322 | 13020370 | CSAR_peak_ | 6.95          | - |
| chr4 | 13020699 | 13020757 | CSAR_peak_ | 14.88         | - |
| chr4 | 13021909 | 13022255 | CSAR_peak_ | 12.13,11.64,  | - |
| chr4 | 13022315 | 13022654 | CSAR_peak_ | 36.74,12.17,  | - |
| chr4 | 13022679 | 13022724 | CSAR_peak_ | 7.27          | - |
| chr4 | 13033284 | 13033380 | CSAR_peak_ | 8.14,10.02,1, | - |

|      |          |          |            |                |   |
|------|----------|----------|------------|----------------|---|
| chr4 | 13033522 | 13033640 | CSAR_peak_ | 9.58,8.39      | - |
| chr4 | 13033674 | 13033743 | CSAR_peak_ | 9.58           | - |
| chr4 | 13033860 | 13033881 | CSAR_peak_ | 6.21,7.27      | - |
| chr4 | 13034222 | 13034256 | CSAR_peak_ | 9.58           | - |
| chr4 | 13034517 | 13034569 | CSAR_peak_ | 12.13          | - |
| chr4 | 13034796 | 13034834 | CSAR_peak_ | 7.27           | - |
| chr4 | 13035200 | 13035268 | CSAR_peak_ | 7.06           | - |
| chr4 | 13035408 | 13035520 | CSAR_peak_ | 10.02,12.13    | - |
| chr4 | 13035719 | 13035816 | CSAR_peak_ | 16.33          | - |
| chr4 | 13036108 | 13036168 | CSAR_peak_ | 7.27           | - |
| chr4 | 13054116 | 13054170 | CSAR_peak_ | 9.58           | - |
| chr4 | 13054821 | 13054871 | CSAR_peak_ | 6.21           | - |
| chr4 | 13055385 | 13055602 | CSAR_peak_ | 12.13,6.03,1(- | - |
| chr4 | 13063353 | 13063400 | CSAR_peak_ | 11.14          | - |
| chr4 | 13063901 | 13063976 | CSAR_peak_ | 9.58           | - |
| chr4 | 13064457 | 13064532 | CSAR_peak_ | 14.88          | - |
| chr4 | 13064646 | 13064728 | CSAR_peak_ | 31.2,10.83     | - |
| chr4 | 13067314 | 13067355 | CSAR_peak_ | 9.58           | - |
| chr4 | 13067357 | 13067420 | CSAR_peak_ | 9.77,9.41      | - |
| chr4 | 13067506 | 13067707 | CSAR_peak_ | 22.56,17.52,(- | - |
| chr4 | 13067723 | 13067773 | CSAR_peak_ | 6.21           | - |
| chr4 | 13067791 | 13067887 | CSAR_peak_ | 21.35,12.13    | - |
| chr4 | 13067897 | 13067953 | CSAR_peak_ | 9.58,7.27      | - |
| chr4 | 13068376 | 13068471 | CSAR_peak_ | 7.27           | - |
| chr4 | 13068594 | 13068708 | CSAR_peak_ | 12.13,10.02,(- | - |
| chr4 | 13068845 | 13068914 | CSAR_peak_ | 11.66          | - |
| chr4 | 13068988 | 13069135 | CSAR_peak_ | 14.34,13.48    | - |
| chr4 | 13069201 | 13069408 | CSAR_peak_ | 25.65,8.44,3(- | - |
| chr4 | 13076990 | 13077025 | CSAR_peak_ | 9.55           | - |
| chr4 | 13077122 | 13077217 | CSAR_peak_ | 6.52,12.13     | - |
| chr4 | 13077234 | 13077313 | CSAR_peak_ | 16.33,10.31    | - |
| chr4 | 13077818 | 13077847 | CSAR_peak_ | 6.21           | - |
| chr4 | 13081518 | 13081572 | CSAR_peak_ | 6.21           | - |
| chr4 | 13083799 | 13083855 | CSAR_peak_ | 7.27           | - |
| chr4 | 13085946 | 13086020 | CSAR_peak_ | 14.88,7.27     | - |
| chr4 | 13090419 | 13090486 | CSAR_peak_ | 7.27           | - |
| chr4 | 13095227 | 13095274 | CSAR_peak_ | 7.27           | - |
| chr4 | 13101041 | 13101098 | CSAR_peak_ | 6.44,6.21      | - |
| chr4 | 13117977 | 13118015 | CSAR_peak_ | 6.21           | - |
| chr4 | 13118608 | 13118629 | CSAR_peak_ | 6.21           | - |
| chr4 | 13118756 | 13118806 | CSAR_peak_ | 7.27           | - |
| chr4 | 13119360 | 13119421 | CSAR_peak_ | 6.21           | - |

|      |          |          |            |                |   |
|------|----------|----------|------------|----------------|---|
| chr4 | 13119513 | 13119539 | CSAR_peak_ | 6.21           | - |
| chr4 | 13170348 | 13170398 | CSAR_peak_ | 8.39           | - |
| chr4 | 13170521 | 13170590 | CSAR_peak_ | 9.41,5.86      | - |
| chr4 | 13170769 | 13170825 | CSAR_peak_ | 8.92           | - |
| chr4 | 13172340 | 13172372 | CSAR_peak_ | 7.27           | - |
| chr4 | 13172449 | 13172532 | CSAR_peak_ | 9.58,10.83     | - |
| chr4 | 13215322 | 13215355 | CSAR_peak_ | 7.27           | - |
| chr4 | 13220261 | 13220590 | CSAR_peak_ | 9.03,9.58,8.2  | - |
| chr4 | 13220682 | 13220733 | CSAR_peak_ | 6.21,8.39      | - |
| chr4 | 13220744 | 13220851 | CSAR_peak_ | 8.14           | - |
| chr4 | 13220861 | 13220984 | CSAR_peak_ | 14.88,6.21     | - |
| chr4 | 13221149 | 13221319 | CSAR_peak_ | 9.72,23.8,8.2  | - |
| chr4 | 13221330 | 13221367 | CSAR_peak_ | 9.58           | - |
| chr4 | 13221379 | 13221522 | CSAR_peak_ | 17.37,13.92    | - |
| chr4 | 13229186 | 13229202 | CSAR_peak_ | 6.95,5.86      | - |
| chr4 | 13229321 | 13229380 | CSAR_peak_ | 16.78,5.95,9.  | - |
| chr4 | 13230438 | 13230488 | CSAR_peak_ | 7.27           | - |
| chr4 | 13240399 | 13240437 | CSAR_peak_ | 6.21           | - |
| chr4 | 13240501 | 13240717 | CSAR_peak_ | 8.14,9.58,7.2  | - |
| chr4 | 13243927 | 13244031 | CSAR_peak_ | 9.58,9.77      | - |
| chr4 | 13244114 | 13244163 | CSAR_peak_ | 9.58           | - |
| chr4 | 13245671 | 13245720 | CSAR_peak_ | 6.21           | - |
| chr4 | 13264775 | 13264857 | CSAR_peak_ | 8.39           | - |
| chr4 | 13264877 | 13264937 | CSAR_peak_ | 9.58,7.27      | - |
| chr4 | 13265057 | 13265140 | CSAR_peak_ | 6.21           | - |
| chr4 | 13265198 | 13265248 | CSAR_peak_ | 6.21           | - |
| chr4 | 13266154 | 13266206 | CSAR_peak_ | 7.27           | - |
| chr4 | 13308833 | 13308886 | CSAR_peak_ | 7.27           | - |
| chr4 | 13309712 | 13309764 | CSAR_peak_ | 7.73,8.39      | - |
| chr4 | 13311131 | 13311205 | CSAR_peak_ | 7,6.21         | - |
| chr4 | 13332870 | 13332979 | CSAR_peak_ | 11.9,13.64,5.  | - |
| chr4 | 13333020 | 13333106 | CSAR_peak_ | 16.2,125.48,;- | - |
| chr4 | 13333202 | 13333290 | CSAR_peak_ | 81.39,71.67,;- | - |
| chr4 | 13334351 | 13334407 | CSAR_peak_ | 7.27           | - |
| chr4 | 13334707 | 13334783 | CSAR_peak_ | 7.27           | - |
| chr4 | 13335069 | 13335236 | CSAR_peak_ | 17.82,13.44    | - |
| chr4 | 13345076 | 13345164 | CSAR_peak_ | 9.58           | - |
| chr4 | 13373220 | 13373268 | CSAR_peak_ | 6.44           | - |
| chr4 | 13373371 | 13373436 | CSAR_peak_ | 7.92,18.73     | - |
| chr4 | 13373550 | 13373664 | CSAR_peak_ | 10.31,17.82    | - |
| chr4 | 13373670 | 13373715 | CSAR_peak_ | 5.86           | - |
| chr4 | 13374133 | 13374164 | CSAR_peak_ | 6.21           | - |

|      |          |          |            |              |   |
|------|----------|----------|------------|--------------|---|
| chr4 | 13374214 | 13374271 | CSAR_peak_ | 13.48,7.27   | - |
| chr4 | 13402605 | 13402673 | CSAR_peak_ | 17.82,9.58   | - |
| chr4 | 13402689 | 13402776 | CSAR_peak_ | 7.92,6.03    | - |
| chr4 | 13402835 | 13402875 | CSAR_peak_ | 7.27         | - |
| chr4 | 13403436 | 13403486 | CSAR_peak_ | 6.21         | - |
| chr4 | 13403645 | 13403708 | CSAR_peak_ | 8.39,12.13   | - |
| chr4 | 13403941 | 13403976 | CSAR_peak_ | 7.27         | - |
| chr4 | 13404015 | 13404073 | CSAR_peak_ | 16.33,6.03   | - |
| chr4 | 13404107 | 13404153 | CSAR_peak_ | 6.03         | - |
| chr4 | 13404488 | 13404625 | CSAR_peak_ | 17.37,10.94  | - |
| chr4 | 13404640 | 13404739 | CSAR_peak_ | 38.71,11.16  | - |
| chr4 | 13404777 | 13404845 | CSAR_peak_ | 53.11,15.02  | - |
| chr4 | 13404861 | 13405140 | CSAR_peak_ | 6.02,17.37,1 | - |
| chr4 | 13405222 | 13405373 | CSAR_peak_ | 23.42,7.26,1 | - |
| chr4 | 13405446 | 13405509 | CSAR_peak_ | 13.89        | - |
| chr4 | 13405692 | 13405763 | CSAR_peak_ | 6.21,7.58    | - |
| chr4 | 13405809 | 13406027 | CSAR_peak_ | 21.81,12.72, | - |
| chr4 | 13406118 | 13406207 | CSAR_peak_ | 9.27,25.91,2 | - |
| chr4 | 13409875 | 13409945 | CSAR_peak_ | 19.98,19.96  | - |
| chr4 | 13431381 | 13431481 | CSAR_peak_ | 8.28,13.51   | - |
| chr4 | 13431719 | 13431773 | CSAR_peak_ | 7.27         | - |
| chr4 | 13431881 | 13431974 | CSAR_peak_ | 9.58,20.94   | - |
| chr4 | 13432398 | 13432426 | CSAR_peak_ | 9.77         | - |
| chr4 | 13432508 | 13432561 | CSAR_peak_ | 8.39         | - |
| chr4 | 13432840 | 13432907 | CSAR_peak_ | 18.73        | - |
| chr4 | 13432985 | 13433038 | CSAR_peak_ | 8.14         | - |
| chr4 | 13433220 | 13433241 | CSAR_peak_ | 5.86         | - |
| chr4 | 13433242 | 13433303 | CSAR_peak_ | 17.82        | - |
| chr4 | 13433843 | 13433907 | CSAR_peak_ | 7.27,9.58    | - |
| chr4 | 13433938 | 13433979 | CSAR_peak_ | 9.58         | - |
| chr4 | 13434088 | 13434144 | CSAR_peak_ | 6.21         | - |
| chr4 | 13434234 | 13434574 | CSAR_peak_ | 10.82,13.69, | - |
| chr4 | 13434598 | 13434812 | CSAR_peak_ | 13.48,14.88, | - |
| chr4 | 13438274 | 13438321 | CSAR_peak_ | 6.81         | - |
| chr4 | 13454414 | 13454482 | CSAR_peak_ | 7.27         | - |
| chr4 | 13454719 | 13454868 | CSAR_peak_ | 7,31.2,19.36 | - |
| chr4 | 13454873 | 13454947 | CSAR_peak_ | 12.13,9.58   | - |
| chr4 | 13455302 | 13455384 | CSAR_peak_ | 7.27,12.13   | - |
| chr4 | 13455619 | 13455675 | CSAR_peak_ | 7.27         | - |
| chr4 | 13455920 | 13455977 | CSAR_peak_ | 7.27         | - |
| chr4 | 13456277 | 13456327 | CSAR_peak_ | 9.58         | - |
| chr4 | 13456841 | 13456890 | CSAR_peak_ | 6.57,12.13   | - |



|      |          |          |            |               |   |
|------|----------|----------|------------|---------------|---|
| chr4 | 13456921 | 13456986 | CSAR_peak_ | 7.27,9.58     | - |
| chr4 | 13456989 | 13457044 | CSAR_peak_ | 7.27          | - |
| chr4 | 13457143 | 13457234 | CSAR_peak_ | 8.14,12.13,1  | - |
| chr4 | 13457328 | 13457388 | CSAR_peak_ | 6.21          | - |
| chr4 | 13457452 | 13457503 | CSAR_peak_ | 19.36,7.27    | - |
| chr4 | 13457547 | 13457655 | CSAR_peak_ | 15.32,21.74   | - |
| chr4 | 13457755 | 13457789 | CSAR_peak_ | 18.35,6.14    | - |
| chr4 | 13458079 | 13458166 | CSAR_peak_ | 18.65,16.34   | - |
| chr4 | 13458293 | 13458383 | CSAR_peak_ | 25.18,17.82   | - |
| chr4 | 13458475 | 13458690 | CSAR_peak_ | 16.33,8.2,13. | - |
| chr4 | 13459228 | 13459383 | CSAR_peak_ | 5.86,33.03,1  | - |
| chr4 | 13459891 | 13459943 | CSAR_peak_ | 16.33         | - |
| chr4 | 13477103 | 13477179 | CSAR_peak_ | 29.2,12.17    | - |
| chr4 | 13477694 | 13477730 | CSAR_peak_ | 6.21          | - |
| chr4 | 13478174 | 13478227 | CSAR_peak_ | 16.11,6.94    | - |
| chr4 | 13478289 | 13478431 | CSAR_peak_ | 16.05,9.77,3  | - |
| chr4 | 13499521 | 13499601 | CSAR_peak_ | 7.27,7.27     | - |
| chr4 | 13501034 | 13501123 | CSAR_peak_ | 10.7          | - |
| chr4 | 13503351 | 13503369 | CSAR_peak_ | 6.21          | - |
| chr4 | 13503501 | 13503600 | CSAR_peak_ | 13.44,14.88,  | - |
| chr4 | 13503701 | 13503755 | CSAR_peak_ | 7.27          | - |
| chr4 | 13504482 | 13504523 | CSAR_peak_ | 7.27          | - |
| chr4 | 13520517 | 13520564 | CSAR_peak_ | 6.57          | - |
| chr4 | 13520697 | 13520778 | CSAR_peak_ | 17.82         | - |
| chr4 | 13521574 | 13521619 | CSAR_peak_ | 12.17         | - |
| chr4 | 13522010 | 13522085 | CSAR_peak_ | 13.51         | - |
| chr4 | 13522340 | 13522405 | CSAR_peak_ | 6.03,7.27     | - |
| chr4 | 13522518 | 13522570 | CSAR_peak_ | 16.33,7.27    | - |
| chr4 | 13530149 | 13530215 | CSAR_peak_ | 10.95         | - |
| chr4 | 13531010 | 13531058 | CSAR_peak_ | 5.86          | - |
| chr4 | 13531160 | 13531220 | CSAR_peak_ | 9.48          | - |
| chr4 | 13531426 | 13531485 | CSAR_peak_ | 7.27          | - |
| chr4 | 13556998 | 13557075 | CSAR_peak_ | 9.58,13.48    | - |
| chr4 | 13568565 | 13568617 | CSAR_peak_ | 7.27          | - |
| chr4 | 13568874 | 13568920 | CSAR_peak_ | 9.58          | - |
| chr4 | 13570127 | 13570230 | CSAR_peak_ | 16.33,20.43   | - |
| chr4 | 13570641 | 13570723 | CSAR_peak_ | 17.82,9.27    | - |
| chr4 | 13571083 | 13571139 | CSAR_peak_ | 7.27          | - |
| chr4 | 13572100 | 13572155 | CSAR_peak_ | 12.74         | - |
| chr4 | 13573284 | 13573334 | CSAR_peak_ | 9.58,9.58     | - |
| chr4 | 13573562 | 13573599 | CSAR_peak_ | 12.17         | - |
| chr4 | 13573698 | 13573838 | CSAR_peak_ | 9.58,9.48,12. | - |

|      |          |          |            |               |   |
|------|----------|----------|------------|---------------|---|
| chr4 | 13574023 | 13574080 | CSAR_peak_ | 12.13         | - |
| chr4 | 13574530 | 13574573 | CSAR_peak_ | 8.28          | - |
| chr4 | 13574736 | 13574797 | CSAR_peak_ | 14.88,10.83   | - |
| chr4 | 13576297 | 13576345 | CSAR_peak_ | 8.65          | - |
| chr4 | 13577755 | 13577808 | CSAR_peak_ | 7.27          | - |
| chr4 | 13594014 | 13594074 | CSAR_peak_ | 17.82,6.21    | - |
| chr4 | 13594338 | 13594368 | CSAR_peak_ | 7.27          | - |
| chr4 | 13594436 | 13594488 | CSAR_peak_ | 7.34          | - |
| chr4 | 13594533 | 13594566 | CSAR_peak_ | 6.21          | - |
| chr4 | 13594861 | 13594875 | CSAR_peak_ | 7.27          | - |
| chr4 | 13595185 | 13595229 | CSAR_peak_ | 6.85          | - |
| chr4 | 13603130 | 13603142 | CSAR_peak_ | 8.14          | - |
| chr4 | 13603229 | 13603334 | CSAR_peak_ | 21.78,7.58,7. | - |
| chr4 | 13603442 | 13603487 | CSAR_peak_ | 7.27          | - |
| chr4 | 13603523 | 13603720 | CSAR_peak_ | 12.59,7.27,1. | - |
| chr4 | 13604108 | 13604126 | CSAR_peak_ | 8.39          | - |
| chr4 | 13604128 | 13604188 | CSAR_peak_ | 7.27          | - |
| chr4 | 13604947 | 13605072 | CSAR_peak_ | 9.03,16.78,1. | - |
| chr4 | 13605092 | 13605229 | CSAR_peak_ | 16.11,13.51,. | - |
| chr4 | 13605250 | 13605329 | CSAR_peak_ | 13.66,7.27    | - |
| chr4 | 13605865 | 13605907 | CSAR_peak_ | 6.21          | - |
| chr4 | 13615095 | 13615145 | CSAR_peak_ | 8.39          | - |
| chr4 | 13616237 | 13616291 | CSAR_peak_ | 7.27          | - |
| chr4 | 13616996 | 13617048 | CSAR_peak_ | 13.48         | - |
| chr4 | 13617615 | 13617699 | CSAR_peak_ | 7.27,6.03     | - |
| chr4 | 13618262 | 13618407 | CSAR_peak_ | 18.4,8.39,9.2 | - |
| chr4 | 13618522 | 13618555 | CSAR_peak_ | 7.27          | - |
| chr4 | 13661471 | 13661587 | CSAR_peak_ | 7.27,9.41     | - |
| chr4 | 13662802 | 13662888 | CSAR_peak_ | 12.17,9.58    | - |
| chr4 | 13663746 | 13663898 | CSAR_peak_ | 16.11,21.94   | - |
| chr4 | 13663900 | 13664076 | CSAR_peak_ | 6.95,12.13,1. | - |
| chr4 | 13669827 | 13669844 | CSAR_peak_ | 7.58          | - |
| chr4 | 13669870 | 13669928 | CSAR_peak_ | 7.27          | - |
| chr4 | 13669940 | 13669978 | CSAR_peak_ | 10.83         | - |
| chr4 | 13670050 | 13670132 | CSAR_peak_ | 14.88,12.31   | - |
| chr4 | 13670226 | 13670316 | CSAR_peak_ | 15.2,7.58     | - |
| chr4 | 13670522 | 13670609 | CSAR_peak_ | 7.27          | - |
| chr4 | 13670704 | 13670750 | CSAR_peak_ | 8.39          | - |
| chr4 | 13670792 | 13670839 | CSAR_peak_ | 5.86,12.5,9.4 | - |
| chr4 | 13670938 | 13670996 | CSAR_peak_ | 10.95,14.88   | - |
| chr4 | 13671002 | 13671048 | CSAR_peak_ | 9.48          | - |
| chr4 | 13671064 | 13671157 | CSAR_peak_ | 12.13         | - |

|      |          |          |            |                |   |
|------|----------|----------|------------|----------------|---|
| chr4 | 13671589 | 13671628 | CSAR_peak_ | 8.39           | - |
| chr4 | 13679967 | 13680018 | CSAR_peak_ | 7.27           | - |
| chr4 | 13688026 | 13688114 | CSAR_peak_ | 10.83,7.27     | - |
| chr4 | 13688464 | 13688521 | CSAR_peak_ | 8.39           | - |
| chr4 | 13691187 | 13691231 | CSAR_peak_ | 5.86           | - |
| chr4 | 13691272 | 13691312 | CSAR_peak_ | 9.58           | - |
| chr4 | 13695350 | 13695405 | CSAR_peak_ | 9.58           | - |
| chr4 | 13697617 | 13697675 | CSAR_peak_ | 8.39           | - |
| chr4 | 13707211 | 13707254 | CSAR_peak_ | 8.39           | - |
| chr4 | 13707282 | 13707325 | CSAR_peak_ | 9.27           | - |
| chr4 | 13707723 | 13708008 | CSAR_peak_ | 27.61,55.05,,- |   |
| chr4 | 13708016 | 13708064 | CSAR_peak_ | 8.75           | - |
| chr4 | 13708138 | 13708182 | CSAR_peak_ | 6.87,6.22      | - |
| chr4 | 13708244 | 13708295 | CSAR_peak_ | 13.48          | - |
| chr4 | 13708300 | 13708688 | CSAR_peak_ | 14.92,51.57,,- |   |
| chr4 | 13708700 | 13708915 | CSAR_peak_ | 40.66,6.81,2,- |   |
| chr4 | 13708919 | 13709069 | CSAR_peak_ | 10.62,9.58     | - |
| chr4 | 13727680 | 13727739 | CSAR_peak_ | 7.27           | - |
| chr4 | 13727759 | 13727948 | CSAR_peak_ | 20.94,10.95,,- |   |
| chr4 | 13746405 | 13746486 | CSAR_peak_ | 6.03,7.27      | - |
| chr4 | 13746550 | 13746588 | CSAR_peak_ | 7.27           | - |
| chr4 | 13749185 | 13749220 | CSAR_peak_ | 6.21           | - |
| chr4 | 13749530 | 13749662 | CSAR_peak_ | 7.27           | - |
| chr4 | 13749837 | 13749879 | CSAR_peak_ | 7.27           | - |
| chr4 | 13750280 | 13750371 | CSAR_peak_ | 11.14          | - |
| chr4 | 13750390 | 13750445 | CSAR_peak_ | 8.39           | - |
| chr4 | 13750520 | 13751220 | CSAR_peak_ | 13.32,48.73,,- |   |
| chr4 | 13751232 | 13751763 | CSAR_peak_ | 68.93,43.11,,- |   |
| chr4 | 13760308 | 13760355 | CSAR_peak_ | 6.21           | - |
| chr4 | 13766958 | 13767007 | CSAR_peak_ | 7.27           | - |
| chr4 | 13768000 | 13768076 | CSAR_peak_ | 7.27           | - |
| chr4 | 13784682 | 13784731 | CSAR_peak_ | 12.13,7.27     | - |
| chr4 | 13786042 | 13786109 | CSAR_peak_ | 12.13          | - |
| chr4 | 13798325 | 13798377 | CSAR_peak_ | 7.27,13.48     | - |
| chr4 | 13799270 | 13799320 | CSAR_peak_ | 12.13          | - |
| chr4 | 13800055 | 13800101 | CSAR_peak_ | 9.58           | - |
| chr4 | 13800241 | 13800325 | CSAR_peak_ | 6.21,9.58      | - |
| chr4 | 13800750 | 13800809 | CSAR_peak_ | 7.73           | - |
| chr4 | 13801232 | 13801267 | CSAR_peak_ | 9.58           | - |
| chr4 | 13802578 | 13802633 | CSAR_peak_ | 8.39           | - |
| chr4 | 13803694 | 13803737 | CSAR_peak_ | 17.82          | - |
| chr4 | 13803835 | 13803870 | CSAR_peak_ | 6.21           | - |

|      |          |          |            |               |   |
|------|----------|----------|------------|---------------|---|
| chr4 | 13803875 | 13803930 | CSAR_peak_ | 14.88,6.85    | - |
| chr4 | 13804307 | 13804318 | CSAR_peak_ | 7.27,6.21     | - |
| chr4 | 13804711 | 13804862 | CSAR_peak_ | 36.78,17.82   | - |
| chr4 | 13805273 | 13805314 | CSAR_peak_ | 7.27          | - |
| chr4 | 13805525 | 13805568 | CSAR_peak_ | 6.21          | - |
| chr4 | 13806118 | 13806151 | CSAR_peak_ | 9.77,6.21,9.4 | - |
| chr4 | 13806589 | 13806654 | CSAR_peak_ | 7.58,14.22,11 | - |
| chr4 | 13806717 | 13806765 | CSAR_peak_ | 10.31         | - |
| chr4 | 13807034 | 13807092 | CSAR_peak_ | 8.65          | - |
| chr4 | 13807743 | 13807804 | CSAR_peak_ | 14.88,5.86    | - |
| chr4 | 13826363 | 13826419 | CSAR_peak_ | 10.83,7.27,5. | - |
| chr4 | 13826826 | 13826976 | CSAR_peak_ | 7.27,7.27,7.2 | - |
| chr4 | 13827036 | 13827071 | CSAR_peak_ | 6.45          | - |
| chr4 | 13827183 | 13827222 | CSAR_peak_ | 7.27          | - |
| chr4 | 13827273 | 13827306 | CSAR_peak_ | 7.27          | - |
| chr4 | 13827349 | 13827405 | CSAR_peak_ | 10.82         | - |
| chr4 | 13852254 | 13852327 | CSAR_peak_ | 8.65,10.94,7. | - |
| chr4 | 13852510 | 13852565 | CSAR_peak_ | 15.96         | - |
| chr4 | 13852669 | 13852732 | CSAR_peak_ | 6.21          | - |
| chr4 | 13853005 | 13853049 | CSAR_peak_ | 8.39          | - |
| chr4 | 13853440 | 13853500 | CSAR_peak_ | 10.83         | - |
| chr4 | 13853877 | 13853918 | CSAR_peak_ | 6.21          | - |
| chr4 | 13858046 | 13858118 | CSAR_peak_ | 5.9,6.94      | - |
| chr4 | 13858220 | 13858301 | CSAR_peak_ | 17.82,7.27    | - |
| chr4 | 13858888 | 13858954 | CSAR_peak_ | 19.36,9.58    | - |
| chr4 | 13859011 | 13859068 | CSAR_peak_ | 12.13,6.21    | - |
| chr4 | 13859073 | 13859148 | CSAR_peak_ | 8.39,16.11    | - |
| chr4 | 13859296 | 13859350 | CSAR_peak_ | 9.58          | - |
| chr4 | 13859365 | 13859429 | CSAR_peak_ | 5.86          | - |
| chr4 | 13859522 | 13859585 | CSAR_peak_ | 7.27          | - |
| chr4 | 13859710 | 13859786 | CSAR_peak_ | 7.27          | - |
| chr4 | 13859919 | 13859959 | CSAR_peak_ | 6.57          | - |
| chr4 | 13862001 | 13862043 | CSAR_peak_ | 14.76         | - |
| chr4 | 13862176 | 13862215 | CSAR_peak_ | 6.02          | - |
| chr4 | 13862731 | 13862769 | CSAR_peak_ | 8.02          | - |
| chr4 | 13862909 | 13862958 | CSAR_peak_ | 12.13         | - |
| chr4 | 13863149 | 13863196 | CSAR_peak_ | 6.21          | - |
| chr4 | 13863242 | 13863301 | CSAR_peak_ | 7.27,7.27     | - |
| chr4 | 13863602 | 13863674 | CSAR_peak_ | 12.13         | - |
| chr4 | 13863764 | 13863864 | CSAR_peak_ | 9.58,14.88    | - |
| chr4 | 13863951 | 13863990 | CSAR_peak_ | 7.27          | - |
| chr4 | 13864207 | 13864230 | CSAR_peak_ | 8.39,6.21     | - |

|      |          |          |            |               |   |
|------|----------|----------|------------|---------------|---|
| chr4 | 13864267 | 13864308 | CSAR_peak_ | 9.77          | - |
| chr4 | 13916055 | 13916176 | CSAR_peak_ | 10.12,17.37   | - |
| chr4 | 13916302 | 13916429 | CSAR_peak_ | 7.92,10.02    | - |
| chr4 | 13916612 | 13916714 | CSAR_peak_ | 8.92,27.61    | - |
| chr4 | 13917134 | 13917194 | CSAR_peak_ | 20.76,12.21,1 | - |
| chr4 | 13917226 | 13917306 | CSAR_peak_ | 48.59,14.62,1 | - |
| chr4 | 13917317 | 13917382 | CSAR_peak_ | 5.86,14.88,1  | - |
| chr4 | 13933481 | 13933560 | CSAR_peak_ | 16.11,16.33   | - |
| chr4 | 13933757 | 13933780 | CSAR_peak_ | 12.13         | - |
| chr4 | 13933927 | 13934017 | CSAR_peak_ | 8.39,10.83    | - |
| chr4 | 13934403 | 13934452 | CSAR_peak_ | 5.86          | - |
| chr4 | 13934720 | 13934802 | CSAR_peak_ | 12.13         | - |
| chr4 | 13934938 | 13935115 | CSAR_peak_ | 12.13,13.48   | - |
| chr4 | 13935273 | 13935323 | CSAR_peak_ | 7.27          | - |
| chr4 | 13935981 | 13936028 | CSAR_peak_ | 5.86,6.11     | - |
| chr4 | 13936167 | 13936229 | CSAR_peak_ | 12.59         | - |
| chr4 | 13936452 | 13936557 | CSAR_peak_ | 8.2,12.6,9.61 | - |
| chr4 | 13937869 | 13937949 | CSAR_peak_ | 6.44          | - |
| chr4 | 13938006 | 13938095 | CSAR_peak_ | 26.69,7.27    | - |
| chr4 | 13938216 | 13938255 | CSAR_peak_ | 8.65          | - |
| chr4 | 13938295 | 13938307 | CSAR_peak_ | 6.21          | - |
| chr4 | 13938583 | 13938626 | CSAR_peak_ | 6.44          | - |
| chr4 | 13941627 | 13941699 | CSAR_peak_ | 7.27          | - |
| chr4 | 13941871 | 13941910 | CSAR_peak_ | 12.17         | - |
| chr4 | 13941926 | 13942054 | CSAR_peak_ | 14.88,7.27    | - |
| chr4 | 13942647 | 13942770 | CSAR_peak_ | 9.58,9.58     | - |
| chr4 | 13944194 | 13944236 | CSAR_peak_ | 7.58          | - |
| chr4 | 13945162 | 13945206 | CSAR_peak_ | 7.27          | - |
| chr4 | 13945906 | 13946026 | CSAR_peak_ | 6.85,7.27     | - |
| chr4 | 13946032 | 13946139 | CSAR_peak_ | 9.58,14.88    | - |
| chr4 | 13946851 | 13946906 | CSAR_peak_ | 8.39,9.58     | - |
| chr4 | 13947235 | 13947291 | CSAR_peak_ | 12.13         | - |
| chr4 | 13947822 | 13947900 | CSAR_peak_ | 7.92,10.83    | - |
| chr4 | 13948025 | 13948095 | CSAR_peak_ | 26.69,30.81   | - |
| chr4 | 13948556 | 13948604 | CSAR_peak_ | 6.21          | - |
| chr4 | 13948837 | 13948897 | CSAR_peak_ | 10.83         | - |
| chr4 | 13948940 | 13949078 | CSAR_peak_ | 7.27,8.39,11. | - |
| chr4 | 13949083 | 13949229 | CSAR_peak_ | 31.77,26.63,; | - |
| chr4 | 13949806 | 13949919 | CSAR_peak_ | 25.07,13.48   | - |
| chr4 | 13949970 | 13950018 | CSAR_peak_ | 10.02         | - |
| chr4 | 13950042 | 13950296 | CSAR_peak_ | 24.21,33.03   | - |
| chr4 | 13950596 | 13950632 | CSAR_peak_ | 6.21          | - |

|      |          |          |            |                |   |
|------|----------|----------|------------|----------------|---|
| chr4 | 13950811 | 13950962 | CSAR_peak_ | 16.33,12.13    | - |
| chr4 | 13951050 | 13951129 | CSAR_peak_ | 20.94,6.21     | - |
| chr4 | 13951752 | 13951804 | CSAR_peak_ | 12.13,14.88    | - |
| chr4 | 13951838 | 13951922 | CSAR_peak_ | 37.04,10.94    | - |
| chr4 | 13951993 | 13952053 | CSAR_peak_ | 19.67,23.76    | - |
| chr4 | 13952101 | 13952125 | CSAR_peak_ | 11.38          | - |
| chr4 | 13952409 | 13952460 | CSAR_peak_ | 7.61,12.27     | - |
| chr4 | 13952579 | 13952593 | CSAR_peak_ | 6.21           | - |
| chr4 | 13952675 | 13952809 | CSAR_peak_ | 20.83,7.27,8.  | - |
| chr4 | 13952908 | 13952982 | CSAR_peak_ | 14.88,17.82    | - |
| chr4 | 13952986 | 13953013 | CSAR_peak_ | 18.35,17.87    | - |
| chr4 | 13953409 | 13953479 | CSAR_peak_ | 24.82,25.07    | - |
| chr4 | 13953654 | 13953694 | CSAR_peak_ | 10.52          | - |
| chr4 | 13953777 | 13953824 | CSAR_peak_ | 27.73          | - |
| chr4 | 13953857 | 13953935 | CSAR_peak_ | 18.85,13.42    | - |
| chr4 | 13953963 | 13954094 | CSAR_peak_ | 25.91,6.85     | - |
| chr4 | 13954213 | 13954310 | CSAR_peak_ | 14.88,12.17    | - |
| chr4 | 13954404 | 13954466 | CSAR_peak_ | 11.96,5.79     | - |
| chr4 | 13954600 | 13955121 | CSAR_peak_ | 35.83,31.27,-  | - |
| chr4 | 13955326 | 13955426 | CSAR_peak_ | 65.64,36.32    | - |
| chr4 | 13955477 | 13955484 | CSAR_peak_ | 6.52           | - |
| chr4 | 13955563 | 13955621 | CSAR_peak_ | 9.58,19.98     | - |
| chr4 | 13955634 | 13955815 | CSAR_peak_ | 9.79,31.72     | - |
| chr4 | 13956294 | 13956340 | CSAR_peak_ | 10.02          | - |
| chr4 | 13956499 | 13956560 | CSAR_peak_ | 19.98,7.06     | - |
| chr4 | 13956706 | 13956790 | CSAR_peak_ | 12.13,10.83    | - |
| chr4 | 13956838 | 13956967 | CSAR_peak_ | 17.82,9.58     | - |
| chr4 | 13957091 | 13957170 | CSAR_peak_ | 16.33,8.44     | - |
| chr4 | 13957396 | 13957476 | CSAR_peak_ | 7.27           | - |
| chr4 | 13957563 | 13957609 | CSAR_peak_ | 9.58           | - |
| chr4 | 13957833 | 13957868 | CSAR_peak_ | 6.21           | - |
| chr4 | 13987980 | 13988070 | CSAR_peak_ | 9.55,6.45,9.5- | - |
| chr4 | 13989539 | 13989580 | CSAR_peak_ | 6.21           | - |
| chr4 | 13989628 | 13989675 | CSAR_peak_ | 12.31          | - |
| chr4 | 13989832 | 13989896 | CSAR_peak_ | 7.92,8.39      | - |
| chr4 | 13989919 | 13989930 | CSAR_peak_ | 7.27           | - |
| chr4 | 13990030 | 13990083 | CSAR_peak_ | 6.95           | - |
| chr4 | 13990689 | 13990733 | CSAR_peak_ | 6.21           | - |
| chr4 | 13993080 | 13993252 | CSAR_peak_ | 8.14,5.86,16.- | - |
| chr4 | 13993517 | 13993609 | CSAR_peak_ | 9.58,17.82     | - |
| chr4 | 13994826 | 13994876 | CSAR_peak_ | 6.21           | - |
| chr4 | 13996109 | 13996388 | CSAR_peak_ | 17.68,5.62,2(- | - |

|      |          |          |            |                |
|------|----------|----------|------------|----------------|
| chr4 | 13996445 | 13996597 | CSAR_peak_ | 6.03,14.76,9.- |
| chr4 | 13996693 | 13996987 | CSAR_peak_ | 8.28,6.03,12.- |
| chr4 | 13997106 | 13997236 | CSAR_peak_ | 20.43,25.62 -  |
| chr4 | 13997365 | 13997421 | CSAR_peak_ | 19.36 -        |
| chr4 | 13997477 | 13997520 | CSAR_peak_ | 6.21 -         |
| chr4 | 13997746 | 13997839 | CSAR_peak_ | 35.24,9.32 -   |
| chr4 | 13997934 | 13998035 | CSAR_peak_ | 9.58 -         |
| chr4 | 13998104 | 13998284 | CSAR_peak_ | 24.33,68.17 -  |
| chr4 | 14008804 | 14008851 | CSAR_peak_ | 5.86,9.58 -    |
| chr4 | 14012437 | 14012492 | CSAR_peak_ | 7.27 -         |
| chr4 | 14068110 | 14068165 | CSAR_peak_ | 8.39,6.21 -    |
| chr4 | 14068298 | 14068348 | CSAR_peak_ | 9.58,6.21 -    |
| chr4 | 14068630 | 14068680 | CSAR_peak_ | 7.27 -         |
| chr4 | 14069895 | 14069942 | CSAR_peak_ | 7.27 -         |
| chr4 | 14071090 | 14071147 | CSAR_peak_ | 8.65 -         |
| chr4 | 14133180 | 14133277 | CSAR_peak_ | 12.13,9.77 -   |
| chr4 | 14133357 | 14133398 | CSAR_peak_ | 8.39 -         |
| chr4 | 14133541 | 14133611 | CSAR_peak_ | 22.56,9.58 -   |
| chr4 | 14133698 | 14133756 | CSAR_peak_ | 13.44 -        |
| chr4 | 14133842 | 14133885 | CSAR_peak_ | 8.39 -         |
| chr4 | 14134114 | 14134240 | CSAR_peak_ | 14.85 -        |
| chr4 | 14134488 | 14134548 | CSAR_peak_ | 6.21 -         |
| chr4 | 14202936 | 14202991 | CSAR_peak_ | 16.08 -        |
| chr4 | 14203012 | 14203059 | CSAR_peak_ | 10.53,16.08 -  |
| chr4 | 14203160 | 14203226 | CSAR_peak_ | 37.04,14.93 -  |
| chr4 | 14203631 | 14203647 | CSAR_peak_ | 6.21 -         |
| chr4 | 14203746 | 14203801 | CSAR_peak_ | 10.18 -        |
| chr4 | 14212591 | 14212640 | CSAR_peak_ | 14.88 -        |
| chr4 | 14266044 | 14266093 | CSAR_peak_ | 7.27 -         |
| chr4 | 14297283 | 14297374 | CSAR_peak_ | 9.58,18.95 -   |
| chr4 | 14297459 | 14297578 | CSAR_peak_ | 9.58 -         |
| chr4 | 14297679 | 14297821 | CSAR_peak_ | 12.74,7.34,1(- |
| chr4 | 14298107 | 14298207 | CSAR_peak_ | 21.22,10.83 -  |
| chr4 | 14298287 | 14298350 | CSAR_peak_ | 24.52,12.74 -  |
| chr4 | 14298384 | 14298431 | CSAR_peak_ | 31.2 -         |
| chr4 | 14298484 | 14298611 | CSAR_peak_ | 24.21,7.27 -   |
| chr4 | 14298760 | 14298826 | CSAR_peak_ | 9.58 -         |
| chr4 | 14298870 | 14298994 | CSAR_peak_ | 17.82,22.56 -  |
| chr4 | 14299082 | 14299141 | CSAR_peak_ | 9.77,10.83 -   |
| chr4 | 14299234 | 14299243 | CSAR_peak_ | 7.27 -         |
| chr4 | 14299391 | 14299449 | CSAR_peak_ | 6.44,7.34 -    |
| chr4 | 14299462 | 14299521 | CSAR_peak_ | 7.26,9.72 -    |

|      |          |          |            |                |   |
|------|----------|----------|------------|----------------|---|
| chr4 | 14299851 | 14299901 | CSAR_peak_ | 6.44           | - |
| chr4 | 14300166 | 14300205 | CSAR_peak_ | 6.21           | - |
| chr4 | 14300402 | 14300416 | CSAR_peak_ | 7.27           | - |
| chr4 | 14300480 | 14300534 | CSAR_peak_ | 10.31,12.17    | - |
| chr4 | 14300813 | 14300891 | CSAR_peak_ | 12.13          | - |
| chr4 | 14300983 | 14301032 | CSAR_peak_ | 11.66          | - |
| chr4 | 14301183 | 14301232 | CSAR_peak_ | 13.84          | - |
| chr4 | 14301382 | 14301463 | CSAR_peak_ | 16.57,22.69    | - |
| chr4 | 14301523 | 14301586 | CSAR_peak_ | 19.98          | - |
| chr4 | 14301733 | 14301828 | CSAR_peak_ | 19.96,6.1      | - |
| chr4 | 14352589 | 14352648 | CSAR_peak_ | 7.27,7.27      | - |
| chr4 | 14353244 | 14353308 | CSAR_peak_ | 7.27,6.21      | - |
| chr4 | 14353387 | 14353438 | CSAR_peak_ | 9.58           | - |
| chr4 | 14354778 | 14354849 | CSAR_peak_ | 7.58           | - |
| chr4 | 14392028 | 14392119 | CSAR_peak_ | 13.51,16.33    | - |
| chr4 | 14392183 | 14392227 | CSAR_peak_ | 7.27           | - |
| chr4 | 14392250 | 14392437 | CSAR_peak_ | 20.43,30.25    | - |
| chr4 | 14392719 | 14392779 | CSAR_peak_ | 8.65           | - |
| chr4 | 14392855 | 14392927 | CSAR_peak_ | 9.77,17.82     | - |
| chr4 | 14392949 | 14393077 | CSAR_peak_ | 11.96,9.58     | - |
| chr4 | 14393133 | 14393364 | CSAR_peak_ | 25.91,26.37    | - |
| chr4 | 14403714 | 14403771 | CSAR_peak_ | 13.48,10.83    | - |
| chr4 | 14404237 | 14404287 | CSAR_peak_ | 9.58           | - |
| chr4 | 14404324 | 14404447 | CSAR_peak_ | 7.58           | - |
| chr4 | 14404494 | 14404504 | CSAR_peak_ | 7.58           | - |
| chr4 | 14404593 | 14404657 | CSAR_peak_ | 9.77           | - |
| chr4 | 14404823 | 14404912 | CSAR_peak_ | 17.82,13.44    | - |
| chr4 | 14404947 | 14405168 | CSAR_peak_ | 11.03,14.88,,- | - |
| chr4 | 14405261 | 14405310 | CSAR_peak_ | 7.34           | - |
| chr4 | 14405337 | 14405410 | CSAR_peak_ | 10.83          | - |
| chr4 | 14405467 | 14405515 | CSAR_peak_ | 16.11          | - |
| chr4 | 14465905 | 14465954 | CSAR_peak_ | 12.13          | - |
| chr4 | 14468649 | 14468692 | CSAR_peak_ | 25.63,19.11    | - |
| chr4 | 14468705 | 14468744 | CSAR_peak_ | 19.03          | - |
| chr4 | 14468814 | 14468854 | CSAR_peak_ | 17.68,9.32     | - |
| chr4 | 14468857 | 14468908 | CSAR_peak_ | 6.62,12.46     | - |
| chr4 | 14468963 | 14469006 | CSAR_peak_ | 7.43,9.72      | - |
| chr4 | 14469008 | 14469059 | CSAR_peak_ | 20.2,18.46,2,- | - |
| chr4 | 14469236 | 14469287 | CSAR_peak_ | 19.08,12.32,,- | - |
| chr4 | 14476645 | 14476713 | CSAR_peak_ | 8.39           | - |
| chr4 | 14476805 | 14476875 | CSAR_peak_ | 8.39,6.21,8.1- | - |
| chr4 | 14477161 | 14477210 | CSAR_peak_ | 6.21           | - |



|      |          |          |            |                |   |
|------|----------|----------|------------|----------------|---|
| chr4 | 14477289 | 14477338 | CSAR_peak_ | 6.21           | - |
| chr4 | 14513525 | 14513566 | CSAR_peak_ | 6.85           | - |
| chr4 | 14534431 | 14534583 | CSAR_peak_ | 20.43,17.51    | - |
| chr4 | 14534586 | 14534626 | CSAR_peak_ | 8.44           | - |
| chr4 | 14534823 | 14535203 | CSAR_peak_ | 30.35,10.82,   | - |
| chr4 | 14535206 | 14535271 | CSAR_peak_ | 8.65           | - |
| chr4 | 14535274 | 14535360 | CSAR_peak_ | 27.06,32.46,   | - |
| chr4 | 14535628 | 14535718 | CSAR_peak_ | 25.07,11.96    | - |
| chr4 | 14535800 | 14535900 | CSAR_peak_ | 22.03,30.56    | - |
| chr4 | 14535910 | 14535971 | CSAR_peak_ | 21.35,15.2     | - |
| chr4 | 14536020 | 14536086 | CSAR_peak_ | 28.62,18.65    | - |
| chr4 | 14536097 | 14536104 | CSAR_peak_ | 8.39           | - |
| chr4 | 14536164 | 14536329 | CSAR_peak_ | 31.91,7,33.1,  | - |
| chr4 | 14536341 | 14536661 | CSAR_peak_ | 10.82,28.94,   | - |
| chr4 | 14536732 | 14536761 | CSAR_peak_ | 7.27           | - |
| chr4 | 14536791 | 14536930 | CSAR_peak_ | 17.51,9.77     | - |
| chr4 | 14536958 | 14537121 | CSAR_peak_ | 18.85,14.88,   | - |
| chr4 | 14543818 | 14543905 | CSAR_peak_ | 24.21,12.13    | - |
| chr4 | 14543963 | 14544204 | CSAR_peak_ | 19.36,9.58,3(- | - |
| chr4 | 14544222 | 14544322 | CSAR_peak_ | 14.88,17.82    | - |
| chr4 | 14544504 | 14544546 | CSAR_peak_ | 6.21           | - |
| chr4 | 14559292 | 14559357 | CSAR_peak_ | 5.86,7.27      | - |
| chr4 | 14560185 | 14560238 | CSAR_peak_ | 6.21           | - |
| chr4 | 14563121 | 14563169 | CSAR_peak_ | 7.27           | - |
| chr4 | 14591079 | 14591145 | CSAR_peak_ | 7.27,12.13     | - |
| chr4 | 14593831 | 14593848 | CSAR_peak_ | 6.21           | - |
| chr4 | 14594975 | 14595050 | CSAR_peak_ | 12.13          | - |
| chr4 | 14605161 | 14605199 | CSAR_peak_ | 8.39           | - |
| chr4 | 14607408 | 14607463 | CSAR_peak_ | 6.21           | - |
| chr4 | 14609070 | 14609179 | CSAR_peak_ | 7.27           | - |
| chr4 | 14610329 | 14610455 | CSAR_peak_ | 25.91          | - |
| chr4 | 14610795 | 14610838 | CSAR_peak_ | 9.58           | - |
| chr4 | 14610919 | 14610972 | CSAR_peak_ | 21.24,8.39     | - |
| chr4 | 14611304 | 14611432 | CSAR_peak_ | 12.27,29.69,   | - |
| chr4 | 14611517 | 14611532 | CSAR_peak_ | 16.77          | - |
| chr4 | 14611554 | 14611639 | CSAR_peak_ | 12.6,8.13      | - |
| chr4 | 14611704 | 14611760 | CSAR_peak_ | 12.13,8.28     | - |
| chr4 | 14611768 | 14611876 | CSAR_peak_ | 9.58,9.55,5.8- | - |
| chr4 | 14611910 | 14612015 | CSAR_peak_ | 8.12,10.83     | - |
| chr4 | 14612142 | 14612160 | CSAR_peak_ | 14.76,12.13    | - |
| chr4 | 14612269 | 14612371 | CSAR_peak_ | 29.4,7.34      | - |
| chr4 | 14612436 | 14612529 | CSAR_peak_ | 16.33,14.76    | - |

|      |          |          |            |                |   |
|------|----------|----------|------------|----------------|---|
| chr4 | 14612794 | 14612901 | CSAR_peak_ | 21.24,9.41     | - |
| chr4 | 14612984 | 14613007 | CSAR_peak_ | 21.94          | - |
| chr4 | 14613060 | 14613101 | CSAR_peak_ | 9.77,7.27      | - |
| chr4 | 14613124 | 14613176 | CSAR_peak_ | 5.86           | - |
| chr4 | 14613218 | 14613265 | CSAR_peak_ | 6.21           | - |
| chr4 | 14613289 | 14613349 | CSAR_peak_ | 7.27,18.65     | - |
| chr4 | 14613460 | 14613532 | CSAR_peak_ | 32.27,12.74    | - |
| chr4 | 14613637 | 14613751 | CSAR_peak_ | 13.37,14.12,(- |   |
| chr4 | 14613798 | 14613808 | CSAR_peak_ | 6.02           | - |
| chr4 | 14613984 | 14614046 | CSAR_peak_ | 11.83,22.58    | - |
| chr4 | 14614053 | 14614095 | CSAR_peak_ | 12.17,9.72     | - |
| chr4 | 14614221 | 14614320 | CSAR_peak_ | 33.03,18.95    | - |
| chr4 | 14614402 | 14614413 | CSAR_peak_ | 7.47           | - |
| chr4 | 14614561 | 14614595 | CSAR_peak_ | 12.13          | - |
| chr4 | 14614647 | 14614699 | CSAR_peak_ | 16.87          | - |
| chr4 | 14614826 | 14614936 | CSAR_peak_ | 20.52,19.34    | - |
| chr4 | 14615009 | 14615078 | CSAR_peak_ | 20.43,26.69    | - |
| chr4 | 14615249 | 14615311 | CSAR_peak_ | 6.21,9.77,6.2- |   |
| chr4 | 14615397 | 14615434 | CSAR_peak_ | 7.27,9.97      | - |
| chr4 | 14615590 | 14615660 | CSAR_peak_ | 13.51,9.15     | - |
| chr4 | 14615750 | 14615796 | CSAR_peak_ | 8.65,6.92      | - |
| chr4 | 14616080 | 14616098 | CSAR_peak_ | 8.65,9.58      | - |
| chr4 | 14616105 | 14616174 | CSAR_peak_ | 6.58,11.74     | - |
| chr4 | 14616249 | 14616289 | CSAR_peak_ | 5.79,9.77      | - |
| chr4 | 14616431 | 14616515 | CSAR_peak_ | 6.21,11.07,8.- |   |
| chr4 | 14616606 | 14616671 | CSAR_peak_ | 21.94,7.92     | - |
| chr4 | 14616754 | 14616800 | CSAR_peak_ | 12.17,12.13    | - |
| chr4 | 14617050 | 14617101 | CSAR_peak_ | 12.13          | - |
| chr4 | 14617153 | 14617260 | CSAR_peak_ | 29.61,12.17,(- |   |
| chr4 | 14617378 | 14617428 | CSAR_peak_ | 8.94           | - |
| chr4 | 14617665 | 14617714 | CSAR_peak_ | 9.61           | - |
| chr4 | 14618178 | 14618240 | CSAR_peak_ | 19.36,17.82    | - |
| chr4 | 14618351 | 14618421 | CSAR_peak_ | 7.53,8.65      | - |
| chr4 | 14618609 | 14618709 | CSAR_peak_ | 11.28,28.93    | - |
| chr4 | 14618752 | 14618815 | CSAR_peak_ | 20.43,10.83    | - |
| chr4 | 14619403 | 14619436 | CSAR_peak_ | 6.02,6.1       | - |
| chr4 | 14619446 | 14619483 | CSAR_peak_ | 8.9            | - |
| chr4 | 14627207 | 14627235 | CSAR_peak_ | 8.39           | - |
| chr4 | 14627352 | 14627483 | CSAR_peak_ | 29.69,6.21     | - |
| chr4 | 14648755 | 14648803 | CSAR_peak_ | 8.2            | - |
| chr4 | 14649474 | 14649516 | CSAR_peak_ | 6.95           | - |
| chr4 | 14649780 | 14649907 | CSAR_peak_ | 9.58,14.88,1(- |   |

|      |          |          |            |                   |   |
|------|----------|----------|------------|-------------------|---|
| chr4 | 14650046 | 14650090 | CSAR_peak_ | 12.31,8.65        | - |
| chr4 | 14650468 | 14650571 | CSAR_peak_ | 8.39              | - |
| chr4 | 14650605 | 14650647 | CSAR_peak_ | 5.86              | - |
| chr4 | 14650665 | 14650697 | CSAR_peak_ | 7.27              | - |
| chr4 | 14651040 | 14651097 | CSAR_peak_ | 9.58              | - |
| chr4 | 14651274 | 14651329 | CSAR_peak_ | 12.13             | - |
| chr4 | 14668394 | 14668455 | CSAR_peak_ | 9.77              | - |
| chr4 | 14669509 | 14669554 | CSAR_peak_ | 7.27              | - |
| chr4 | 14670086 | 14670136 | CSAR_peak_ | 9.58              | - |
| chr4 | 14689523 | 14689572 | CSAR_peak_ | 7.27              | - |
| chr4 | 14692081 | 14692162 | CSAR_peak_ | 8.39              | - |
| chr4 | 14703374 | 14703424 | CSAR_peak_ | 9.58              | - |
| chr4 | 14710528 | 14710600 | CSAR_peak_ | 9.55              | - |
| chr4 | 14770841 | 14770881 | CSAR_peak_ | 9.41              | - |
| chr4 | 14770886 | 14770939 | CSAR_peak_ | 8.39,9.11         | - |
| chr4 | 14770995 | 14771075 | CSAR_peak_ | 43.03,28.6        | - |
| chr4 | 14771113 | 14771137 | CSAR_peak_ | 14.76             | - |
| chr4 | 14771334 | 14771370 | CSAR_peak_ | 10.17             | - |
| chr4 | 14771466 | 14771479 | CSAR_peak_ | 7.58              | - |
| chr4 | 14771618 | 14771654 | CSAR_peak_ | 9.77              | - |
| chr4 | 14771720 | 14771812 | CSAR_peak_ | 6.78,12.27        | - |
| chr4 | 14771861 | 14771912 | CSAR_peak_ | 17.82,6.22        | - |
| chr4 | 14772000 | 14772054 | CSAR_peak_ | 6.95,9.58         | - |
| chr4 | 14772121 | 14772207 | CSAR_peak_ | 7.27,7.27         | - |
| chr4 | 14772306 | 14772472 | CSAR_peak_ | 16.19,9.27,20.17  | - |
| chr4 | 14772644 | 14772711 | CSAR_peak_ | 13.29             | - |
| chr4 | 14772735 | 14772831 | CSAR_peak_ | 29.2,18.73        | - |
| chr4 | 14772898 | 14772945 | CSAR_peak_ | 12.6              | - |
| chr4 | 14772962 | 14773060 | CSAR_peak_ | 7.35,5.89         | - |
| chr4 | 14773137 | 14773251 | CSAR_peak_ | 25.03,10.83,10.83 | - |
| chr4 | 14773330 | 14773419 | CSAR_peak_ | 29.14,37.97       | - |
| chr4 | 14773451 | 14773521 | CSAR_peak_ | 9.58,14.22,10.83  | - |
| chr4 | 14773540 | 14773596 | CSAR_peak_ | 14.76,17.51       | - |
| chr4 | 14773657 | 14773693 | CSAR_peak_ | 9.77              | - |
| chr4 | 14774073 | 14774164 | CSAR_peak_ | 7.27              | - |
| chr4 | 14774414 | 14774477 | CSAR_peak_ | 9.27              | - |
| chr4 | 14774494 | 14774563 | CSAR_peak_ | 24.17,14.88       | - |
| chr4 | 14774601 | 14774681 | CSAR_peak_ | 31.19,20.18       | - |
| chr4 | 14774716 | 14774775 | CSAR_peak_ | 30.8,25.18        | - |
| chr4 | 14775199 | 14775238 | CSAR_peak_ | 9.58              | - |
| chr4 | 14775597 | 14775660 | CSAR_peak_ | 7.27              | - |
| chr4 | 14775872 | 14775941 | CSAR_peak_ | 14.88             | - |

|      |          |          |            |                |   |
|------|----------|----------|------------|----------------|---|
| chr4 | 14775981 | 14776022 | CSAR_peak_ | 10.02          | - |
| chr4 | 14786833 | 14786892 | CSAR_peak_ | 19.36,8.28     | - |
| chr4 | 14787058 | 14787121 | CSAR_peak_ | 7.27           | - |
| chr4 | 14787336 | 14787393 | CSAR_peak_ | 9.77           | - |
| chr4 | 14787721 | 14787812 | CSAR_peak_ | 6.21           | - |
| chr4 | 14787846 | 14787937 | CSAR_peak_ | 6.21,8.65      | - |
| chr4 | 14788868 | 14788922 | CSAR_peak_ | 6.21,7.27      | - |
| chr4 | 14803421 | 14803483 | CSAR_peak_ | 13.48          | - |
| chr4 | 14808642 | 14808716 | CSAR_peak_ | 46.67,21.35    | - |
| chr4 | 14808822 | 14808899 | CSAR_peak_ | 12.31,7.26     | - |
| chr4 | 14808917 | 14809015 | CSAR_peak_ | 17.82          | - |
| chr4 | 14809067 | 14809132 | CSAR_peak_ | 10.94,12.13    | - |
| chr4 | 14809194 | 14809251 | CSAR_peak_ | 8.53           | - |
| chr4 | 14809341 | 14809405 | CSAR_peak_ | 20.94,8.65     | - |
| chr4 | 14809437 | 14809456 | CSAR_peak_ | 9.27           | - |
| chr4 | 14809518 | 14809557 | CSAR_peak_ | 6.21           | - |
| chr4 | 14809574 | 14809630 | CSAR_peak_ | 7.27           | - |
| chr4 | 14809663 | 14809732 | CSAR_peak_ | 8.95,12.13     | - |
| chr4 | 14816999 | 14817103 | CSAR_peak_ | 19.36,50.81    | - |
| chr4 | 14817314 | 14817354 | CSAR_peak_ | 7.27           | - |
| chr4 | 14817539 | 14817633 | CSAR_peak_ | 9.58           | - |
| chr4 | 14818108 | 14818181 | CSAR_peak_ | 16.11,12.13    | - |
| chr4 | 14818351 | 14818413 | CSAR_peak_ | 12.13          | - |
| chr4 | 14818580 | 14818674 | CSAR_peak_ | 7.27,8.39      | - |
| chr4 | 14818911 | 14818955 | CSAR_peak_ | 12.13          | - |
| chr4 | 14819277 | 14819398 | CSAR_peak_ | 11.14,23.95,-  | - |
| chr4 | 14819436 | 14819824 | CSAR_peak_ | 17.82,9.58,5:- | - |
| chr4 | 14819873 | 14820010 | CSAR_peak_ | 54.49,36.6,6.- | - |
| chr4 | 14820024 | 14820184 | CSAR_peak_ | 21.94,11.03,-  | - |
| chr4 | 14820185 | 14820269 | CSAR_peak_ | 30.21,22.74    | - |
| chr4 | 14820316 | 14820427 | CSAR_peak_ | 30.56,15.3     | - |
| chr4 | 14820440 | 14820486 | CSAR_peak_ | 10.83          | - |
| chr4 | 14825933 | 14826070 | CSAR_peak_ | 21.35,24.21,-  | - |
| chr4 | 14826106 | 14826160 | CSAR_peak_ | 9.58           | - |
| chr4 | 14826212 | 14826245 | CSAR_peak_ | 6.21           | - |
| chr4 | 14826361 | 14826408 | CSAR_peak_ | 7.27           | - |
| chr4 | 14826426 | 14826537 | CSAR_peak_ | 9.77,7.27      | - |
| chr4 | 14826570 | 14826652 | CSAR_peak_ | 20.43,11.45    | - |
| chr4 | 14826717 | 14826775 | CSAR_peak_ | 12.13          | - |
| chr4 | 14826796 | 14826835 | CSAR_peak_ | 6.21           | - |
| chr4 | 14826878 | 14826935 | CSAR_peak_ | 14.63          | - |
| chr4 | 14829267 | 14829310 | CSAR_peak_ | 8.39,9.58      | - |

|      |          |          |            |              |   |
|------|----------|----------|------------|--------------|---|
| chr4 | 14829487 | 14829528 | CSAR_peak_ | 7.27         | - |
| chr4 | 14838528 | 14838624 | CSAR_peak_ | 14.88        | - |
| chr4 | 14838750 | 14838780 | CSAR_peak_ | 5.79         | - |
| chr4 | 14839752 | 14839790 | CSAR_peak_ | 6.21         | - |
| chr4 | 14839988 | 14840016 | CSAR_peak_ | 26.05        | - |
| chr4 | 14840083 | 14840151 | CSAR_peak_ | 24.21,19.45, | - |
| chr4 | 14855554 | 14855662 | CSAR_peak_ | 9.58         | - |
| chr4 | 14855668 | 14855749 | CSAR_peak_ | 8.39         | - |
| chr4 | 14855974 | 14856069 | CSAR_peak_ | 8.52,6.21    | - |
| chr4 | 14856081 | 14856101 | CSAR_peak_ | 7.58         | - |
| chr4 | 14856396 | 14856555 | CSAR_peak_ | 13.48,16.19  | - |
| chr4 | 14862194 | 14862265 | CSAR_peak_ | 6.02         | - |
| chr4 | 14878320 | 14878376 | CSAR_peak_ | 6.21         | - |
| chr4 | 14881652 | 14881693 | CSAR_peak_ | 8.39         | - |
| chr4 | 14881986 | 14882079 | CSAR_peak_ | 6.44,13.85   | - |
| chr4 | 14882136 | 14882196 | CSAR_peak_ | 7.58         | - |
| chr4 | 14882226 | 14882336 | CSAR_peak_ | 13.09,8.95   | - |
| chr4 | 14882546 | 14882598 | CSAR_peak_ | 7.34         | - |
| chr4 | 14882904 | 14882979 | CSAR_peak_ | 17.82        | - |
| chr4 | 14899240 | 14899287 | CSAR_peak_ | 12.17,6.57   | - |
| chr4 | 14899373 | 14899449 | CSAR_peak_ | 14.88        | - |
| chr4 | 14899522 | 14899572 | CSAR_peak_ | 6.45         | - |
| chr4 | 14899659 | 14899740 | CSAR_peak_ | 10.83,6.57   | - |
| chr4 | 14900070 | 14900147 | CSAR_peak_ | 7.27         | - |
| chr4 | 14900236 | 14900253 | CSAR_peak_ | 12.17        | - |
| chr4 | 14900389 | 14900465 | CSAR_peak_ | 6.21,8.39    | - |
| chr4 | 14901042 | 14901072 | CSAR_peak_ | 10.83        | - |
| chr4 | 14901265 | 14901298 | CSAR_peak_ | 5.86         | - |
| chr4 | 14901299 | 14901360 | CSAR_peak_ | 10.95        | - |
| chr4 | 14901365 | 14901418 | CSAR_peak_ | 7.27         | - |
| chr4 | 14901520 | 14901585 | CSAR_peak_ | 6.21         | - |
| chr4 | 14927807 | 14927866 | CSAR_peak_ | 9.58         | - |
| chr4 | 14930803 | 14930946 | CSAR_peak_ | 9.77         | - |
| chr4 | 14931903 | 14931995 | CSAR_peak_ | 7.27         | - |
| chr4 | 14932605 | 14932670 | CSAR_peak_ | 9.97         | - |
| chr4 | 14932804 | 14932840 | CSAR_peak_ | 9.77,7       | - |
| chr4 | 14933981 | 14934040 | CSAR_peak_ | 8.39         | - |
| chr4 | 14938241 | 14938312 | CSAR_peak_ | 16.33        | - |
| chr4 | 14938364 | 14938421 | CSAR_peak_ | 7.27         | - |
| chr4 | 14938515 | 14938567 | CSAR_peak_ | 9.58,7.27    | - |
| chr4 | 14938868 | 14938936 | CSAR_peak_ | 9.58,10.83   | - |
| chr4 | 14939033 | 14939077 | CSAR_peak_ | 6.21         | - |

|      |          |          |            |                |   |
|------|----------|----------|------------|----------------|---|
| chr4 | 14939093 | 14939129 | CSAR_peak_ | 7.27           | - |
| chr4 | 14939284 | 14939323 | CSAR_peak_ | 31.2,10.7      | - |
| chr4 | 14939408 | 14939511 | CSAR_peak_ | 28.21,24.17    | - |
| chr4 | 14939594 | 14939717 | CSAR_peak_ | 10.83,5.86,1!  | - |
| chr4 | 14939728 | 14939801 | CSAR_peak_ | 16.11,8.65     | - |
| chr4 | 14939809 | 14939869 | CSAR_peak_ | 7.27           | - |
| chr4 | 14939953 | 14940018 | CSAR_peak_ | 17.82,9.58     | - |
| chr4 | 14940207 | 14940298 | CSAR_peak_ | 13.92,8.52     | - |
| chr4 | 14940395 | 14940488 | CSAR_peak_ | 7.27           | - |
| chr4 | 14940580 | 14940632 | CSAR_peak_ | 24.21,13.44    | - |
| chr4 | 14940940 | 14940977 | CSAR_peak_ | 9.58,12.13     | - |
| chr4 | 14949641 | 14949694 | CSAR_peak_ | 6.21           | - |
| chr4 | 14959558 | 14959679 | CSAR_peak_ | 73.89,22.74,/- | - |
| chr4 | 14974458 | 14974500 | CSAR_peak_ | 7.34,6.95      | - |
| chr4 | 14974729 | 14974800 | CSAR_peak_ | 9.58           | - |
| chr4 | 14974851 | 14974896 | CSAR_peak_ | 7.27           | - |
| chr4 | 14994098 | 14994161 | CSAR_peak_ | 7.58           | - |
| chr4 | 14994496 | 14994535 | CSAR_peak_ | 7.27           | - |
| chr4 | 14995456 | 14995492 | CSAR_peak_ | 7.27           | - |
| chr4 | 14996529 | 14996585 | CSAR_peak_ | 10.83          | - |
| chr4 | 14997959 | 14997996 | CSAR_peak_ | 6.21           | - |
| chr4 | 14998104 | 14998240 | CSAR_peak_ | 7.58,6.03      | - |
| chr4 | 15041899 | 15042023 | CSAR_peak_ | 9.58,14.88     | - |
| chr4 | 15042103 | 15042159 | CSAR_peak_ | 6.21           | - |
| chr4 | 15042485 | 15042574 | CSAR_peak_ | 12.17,8.39     | - |
| chr4 | 15042593 | 15042651 | CSAR_peak_ | 12.31          | - |
| chr4 | 15042675 | 15042783 | CSAR_peak_ | 7.31,6.81,8.3- | - |
| chr4 | 15042851 | 15042993 | CSAR_peak_ | 7.92,7.34,8.1- | - |
| chr4 | 15043004 | 15043032 | CSAR_peak_ | 9.58,24.21     | - |
| chr4 | 15043088 | 15043176 | CSAR_peak_ | 25.07,23.03    | - |
| chr4 | 15043261 | 15043370 | CSAR_peak_ | 6.95,17.37,1(- | - |
| chr4 | 15043408 | 15043522 | CSAR_peak_ | 6.45,9.77,13.- | - |
| chr4 | 15043524 | 15043575 | CSAR_peak_ | 16.33          | - |
| chr4 | 15043579 | 15043677 | CSAR_peak_ | 7.27,7.92      | - |
| chr4 | 15043686 | 15043706 | CSAR_peak_ | 7.73           | - |
| chr4 | 15043796 | 15043837 | CSAR_peak_ | 9.27,6.57      | - |
| chr4 | 15043921 | 15043995 | CSAR_peak_ | 17.82,12.17    | - |
| chr4 | 15044165 | 15044360 | CSAR_peak_ | 23.03,15.56,-  | - |
| chr4 | 15044734 | 15044836 | CSAR_peak_ | 7.27           | - |
| chr4 | 15045029 | 15045091 | CSAR_peak_ | 7.27,7.27      | - |
| chr4 | 15045376 | 15045386 | CSAR_peak_ | 10.83          | - |
| chr4 | 15045389 | 15045525 | CSAR_peak_ | 12.72,14.88    | - |

|      |          |          |            |                |   |
|------|----------|----------|------------|----------------|---|
| chr4 | 15046081 | 15046164 | CSAR_peak_ | 14.88,17.82    | - |
| chr4 | 15046195 | 15046295 | CSAR_peak_ | 10.82,25.08,   | - |
| chr4 | 15046604 | 15046721 | CSAR_peak_ | 7.61,14.85     | - |
| chr4 | 15046843 | 15046994 | CSAR_peak_ | 10.02,13.66    | - |
| chr4 | 15047076 | 15047128 | CSAR_peak_ | 16.11          | - |
| chr4 | 15047227 | 15047304 | CSAR_peak_ | 7.27,14.88     | - |
| chr4 | 15047400 | 15047496 | CSAR_peak_ | 12.13,18.55,   | - |
| chr4 | 15047619 | 15047698 | CSAR_peak_ | 14.76,10.31    | - |
| chr4 | 15047783 | 15047825 | CSAR_peak_ | 11.63,10.31    | - |
| chr4 | 15047916 | 15047974 | CSAR_peak_ | 19.36          | - |
| chr4 | 15048437 | 15048484 | CSAR_peak_ | 12.13          | - |
| chr4 | 15048717 | 15048760 | CSAR_peak_ | 6.21           | - |
| chr4 | 15052603 | 15052676 | CSAR_peak_ | 9.58,9.58      | - |
| chr4 | 15053204 | 15053259 | CSAR_peak_ | 6.21           | - |
| chr4 | 15053739 | 15053813 | CSAR_peak_ | 9.27,13.48     | - |
| chr4 | 15053816 | 15053871 | CSAR_peak_ | 8.2            | - |
| chr4 | 15057393 | 15057443 | CSAR_peak_ | 7.27,8.39      | - |
| chr4 | 15112732 | 15112782 | CSAR_peak_ | 10.02          | - |
| chr4 | 15112808 | 15112918 | CSAR_peak_ | 12.31,7.27     | - |
| chr4 | 15113331 | 15113406 | CSAR_peak_ | 8.39,7.27      | - |
| chr4 | 15113461 | 15113535 | CSAR_peak_ | 12.13          | - |
| chr4 | 15113550 | 15113648 | CSAR_peak_ | 13.84,18.61    | - |
| chr4 | 15144013 | 15144052 | CSAR_peak_ | 6.21           | - |
| chr4 | 15153948 | 15154021 | CSAR_peak_ | 22.52,20.18    | - |
| chr4 | 15154332 | 15154383 | CSAR_peak_ | 7.27           | - |
| chr4 | 15154455 | 15154549 | CSAR_peak_ | 14.88,9.58     | - |
| chr4 | 15154846 | 15154928 | CSAR_peak_ | 7.27           | - |
| chr4 | 15242351 | 15242395 | CSAR_peak_ | 7.27           | - |
| chr4 | 15247701 | 15247741 | CSAR_peak_ | 7.27           | - |
| chr4 | 15256457 | 15256493 | CSAR_peak_ | 8.39,9.58      | - |
| chr4 | 15256578 | 15256617 | CSAR_peak_ | 10.83          | - |
| chr4 | 15256770 | 15256815 | CSAR_peak_ | 7.27           | - |
| chr4 | 15260176 | 15260215 | CSAR_peak_ | 7.27           | - |
| chr4 | 15273719 | 15273782 | CSAR_peak_ | 16.6,8.92      | - |
| chr4 | 15273897 | 15273945 | CSAR_peak_ | 6.1            | - |
| chr4 | 15273961 | 15274077 | CSAR_peak_ | 16.33,6.57,7.- | - |
| chr4 | 15274197 | 15274352 | CSAR_peak_ | 18.65,11.14,   | - |
| chr4 | 15274361 | 15274426 | CSAR_peak_ | 17.4,10.95     | - |
| chr4 | 15274434 | 15274556 | CSAR_peak_ | 12.17,25.91    | - |
| chr4 | 15274623 | 15274733 | CSAR_peak_ | 31.77,15.56    | - |
| chr4 | 15274789 | 15274841 | CSAR_peak_ | 8.12           | - |
| chr4 | 15274874 | 15274993 | CSAR_peak_ | 9.79,7.61,12.- | - |

|      |          |          |            |                |   |
|------|----------|----------|------------|----------------|---|
| chr4 | 15276602 | 15276709 | CSAR_peak_ | 9.58           | - |
| chr4 | 15277150 | 15277204 | CSAR_peak_ | 12.13,14.88    | - |
| chr4 | 15289766 | 15289812 | CSAR_peak_ | 7.27,6.21      | - |
| chr4 | 15290130 | 15290189 | CSAR_peak_ | 7.27           | - |
| chr4 | 15290341 | 15290401 | CSAR_peak_ | 13.92          | - |
| chr4 | 15290427 | 15290485 | CSAR_peak_ | 9.58,10.94     | - |
| chr4 | 15290777 | 15290821 | CSAR_peak_ | 8.39,12.17     | - |
| chr4 | 15291033 | 15291106 | CSAR_peak_ | 7.27           | - |
| chr4 | 15291305 | 15291411 | CSAR_peak_ | 8.65           | - |
| chr4 | 15346656 | 15346776 | CSAR_peak_ | 9.58,7.27      | - |
| chr4 | 15346900 | 15346915 | CSAR_peak_ | 7.27           | - |
| chr4 | 15347253 | 15347289 | CSAR_peak_ | 6.94,6.52      | - |
| chr4 | 15347549 | 15347623 | CSAR_peak_ | 5.86,34.39,1(- | - |
| chr4 | 15364808 | 15364856 | CSAR_peak_ | 7              | - |
| chr4 | 15364979 | 15364999 | CSAR_peak_ | 7.27           | - |
| chr4 | 15365278 | 15365330 | CSAR_peak_ | 8.14           | - |
| chr4 | 15365331 | 15365376 | CSAR_peak_ | 8.39           | - |
| chr4 | 15390891 | 15390949 | CSAR_peak_ | 5.86,6.03      | - |
| chr4 | 15390950 | 15391054 | CSAR_peak_ | 8.14,13.69     | - |
| chr4 | 15391165 | 15391245 | CSAR_peak_ | 12.13          | - |
| chr4 | 15391506 | 15391556 | CSAR_peak_ | 9.58           | - |
| chr4 | 15391633 | 15391678 | CSAR_peak_ | 9.58           | - |
| chr4 | 15391841 | 15391924 | CSAR_peak_ | 14.88,9.58     | - |
| chr4 | 15391942 | 15392001 | CSAR_peak_ | 7.27,6.21      | - |
| chr4 | 15406819 | 15406880 | CSAR_peak_ | 17.82          | - |
| chr4 | 15407293 | 15407323 | CSAR_peak_ | 8.39           | - |
| chr4 | 15407405 | 15407474 | CSAR_peak_ | 6.57           | - |
| chr4 | 15407735 | 15407738 | CSAR_peak_ | 6.21           | - |
| chr4 | 15407825 | 15407869 | CSAR_peak_ | 7.58,5.86      | - |
| chr4 | 15407974 | 15408011 | CSAR_peak_ | 8.39,6.21      | - |
| chr4 | 15412134 | 15412198 | CSAR_peak_ | 10.83          | - |
| chr4 | 15413292 | 15413339 | CSAR_peak_ | 6.21           | - |
| chr4 | 15414501 | 15414567 | CSAR_peak_ | 7.27           | - |
| chr4 | 15419302 | 15419352 | CSAR_peak_ | 7.27           | - |
| chr4 | 15419497 | 15419568 | CSAR_peak_ | 9.77,6.21      | - |
| chr4 | 15419625 | 15419657 | CSAR_peak_ | 7.27           | - |
| chr4 | 15419748 | 15419896 | CSAR_peak_ | 8.14,7.27,10.- | - |
| chr4 | 15420205 | 15420253 | CSAR_peak_ | 11.66,10.94    | - |
| chr4 | 15420330 | 15420378 | CSAR_peak_ | 14.76,18.95    | - |
| chr4 | 15421044 | 15421118 | CSAR_peak_ | 7.58           | - |
| chr4 | 15421338 | 15421403 | CSAR_peak_ | 13.48          | - |
| chr4 | 15422043 | 15422095 | CSAR_peak_ | 9.58,12.13     | - |



|      |          |          |            |               |   |
|------|----------|----------|------------|---------------|---|
| chr4 | 15422203 | 15422240 | CSAR_peak_ | 7.27,7.58     | - |
| chr4 | 15470889 | 15470940 | CSAR_peak_ | 9.77          | - |
| chr4 | 15472888 | 15472927 | CSAR_peak_ | 12.17         | - |
| chr4 | 15473001 | 15473067 | CSAR_peak_ | 12.13         | - |
| chr4 | 15475543 | 15475575 | CSAR_peak_ | 7.27          | - |
| chr4 | 15504775 | 15504835 | CSAR_peak_ | 6.57          | - |
| chr4 | 15504998 | 15505071 | CSAR_peak_ | 6.81,9.58     | - |
| chr4 | 15505205 | 15505288 | CSAR_peak_ | 8.39          | - |
| chr4 | 15505626 | 15505699 | CSAR_peak_ | 12.31         | - |
| chr4 | 15506068 | 15506175 | CSAR_peak_ | 12.13,19.36   | - |
| chr4 | 15506191 | 15506250 | CSAR_peak_ | 5.86          | - |
| chr4 | 15506306 | 15506397 | CSAR_peak_ | 8.95,6.44     | - |
| chr4 | 15506418 | 15506463 | CSAR_peak_ | 5.86          | - |
| chr4 | 15520389 | 15520482 | CSAR_peak_ | 10.94,14.88   | - |
| chr4 | 15520688 | 15520768 | CSAR_peak_ | 8.39          | - |
| chr4 | 15520963 | 15521010 | CSAR_peak_ | 7.27          | - |
| chr4 | 15521391 | 15521442 | CSAR_peak_ | 7.27          | - |
| chr4 | 15522019 | 15522076 | CSAR_peak_ | 14.88         | - |
| chr4 | 15526709 | 15526800 | CSAR_peak_ | 13.48         | - |
| chr4 | 15526827 | 15526850 | CSAR_peak_ | 7.27          | - |
| chr4 | 15526906 | 15526958 | CSAR_peak_ | 12.13         | - |
| chr4 | 15527101 | 15527181 | CSAR_peak_ | 10.94,18.65   | - |
| chr4 | 15527356 | 15527396 | CSAR_peak_ | 6.21          | - |
| chr4 | 15527435 | 15527509 | CSAR_peak_ | 7.27,6.21     | - |
| chr4 | 15538092 | 15538153 | CSAR_peak_ | 7.27          | - |
| chr4 | 15538172 | 15538258 | CSAR_peak_ | 7.27,6.21     | - |
| chr4 | 15538687 | 15538716 | CSAR_peak_ | 6.87          | - |
| chr4 | 15538809 | 15538921 | CSAR_peak_ | 9.61,10.83    | - |
| chr4 | 15539230 | 15539281 | CSAR_peak_ | 6.57          | - |
| chr4 | 15539552 | 15539602 | CSAR_peak_ | 19.36,10.83   | - |
| chr4 | 15539671 | 15539709 | CSAR_peak_ | 8.28          | - |
| chr4 | 15539818 | 15539863 | CSAR_peak_ | 7.27,9.58     | - |
| chr4 | 15539981 | 15540031 | CSAR_peak_ | 8.39          | - |
| chr4 | 15540173 | 15540190 | CSAR_peak_ | 7.68          | - |
| chr4 | 15540899 | 15540964 | CSAR_peak_ | 13.29,9.72    | - |
| chr4 | 15541779 | 15541814 | CSAR_peak_ | 8.39          | - |
| chr4 | 15541890 | 15541944 | CSAR_peak_ | 12.13         | - |
| chr4 | 15542110 | 15542147 | CSAR_peak_ | 8.39          | - |
| chr4 | 15542162 | 15542211 | CSAR_peak_ | 8.39          | - |
| chr4 | 15573970 | 15574130 | CSAR_peak_ | 17.82,16.33,- | - |
| chr4 | 15612819 | 15612871 | CSAR_peak_ | 12.13,12.13   | - |
| chr4 | 15613415 | 15613461 | CSAR_peak_ | 5.86          | - |

|      |          |          |            |                |   |
|------|----------|----------|------------|----------------|---|
| chr4 | 15613981 | 15614089 | CSAR_peak_ | 8.39,25.91     | - |
| chr4 | 15641200 | 15641261 | CSAR_peak_ | 9.58           | - |
| chr4 | 15641454 | 15641481 | CSAR_peak_ | 6.44,7.26      | - |
| chr4 | 15641661 | 15641726 | CSAR_peak_ | 8.14,6.21      | - |
| chr4 | 15641994 | 15642053 | CSAR_peak_ | 9.97,9.25      | - |
| chr4 | 15642114 | 15642183 | CSAR_peak_ | 18.61,21.94    | - |
| chr4 | 15642244 | 15642311 | CSAR_peak_ | 6.72,11.14     | - |
| chr4 | 15642411 | 15642433 | CSAR_peak_ | 6.57           | - |
| chr4 | 15642506 | 15642669 | CSAR_peak_ | 8.39,6.45,6.2- | - |
| chr4 | 15642769 | 15642814 | CSAR_peak_ | 7.27,10.95     | - |
| chr4 | 15642836 | 15642943 | CSAR_peak_ | 6.21,7.27      | - |
| chr4 | 15643119 | 15643258 | CSAR_peak_ | 34.89,17.37    | - |
| chr4 | 15643340 | 15643382 | CSAR_peak_ | 7.29           | - |
| chr4 | 15643409 | 15643433 | CSAR_peak_ | 5.91           | - |
| chr4 | 15643564 | 15643663 | CSAR_peak_ | 12.13,9.77     | - |
| chr4 | 15644472 | 15644527 | CSAR_peak_ | 11.38          | - |
| chr4 | 15644653 | 15644702 | CSAR_peak_ | 9.55,7.06,8.1- | - |
| chr4 | 15644728 | 15644776 | CSAR_peak_ | 7.26           | - |
| chr4 | 15644800 | 15644892 | CSAR_peak_ | 18.1,7.92      | - |
| chr4 | 15644981 | 15645020 | CSAR_peak_ | 7.27           | - |
| chr4 | 15645585 | 15645641 | CSAR_peak_ | 8.65           | - |
| chr4 | 15645656 | 15645801 | CSAR_peak_ | 34.31,20.05    | - |
| chr4 | 15646308 | 15646366 | CSAR_peak_ | 55.4,23.2      | - |
| chr4 | 15647997 | 15648048 | CSAR_peak_ | 6.21           | - |
| chr4 | 15649692 | 15649758 | CSAR_peak_ | 6.21           | - |
| chr4 | 15668960 | 15669022 | CSAR_peak_ | 7.27           | - |
| chr4 | 15690557 | 15690629 | CSAR_peak_ | 7.27,22.56     | - |
| chr4 | 15693256 | 15693299 | CSAR_peak_ | 6.21           | - |
| chr4 | 15693437 | 15693491 | CSAR_peak_ | 9.58           | - |
| chr4 | 15694824 | 15694887 | CSAR_peak_ | 12.13          | - |
| chr4 | 15716480 | 15716593 | CSAR_peak_ | 14.88,8.14,8.- | - |
| chr4 | 15716848 | 15716917 | CSAR_peak_ | 9.58           | - |
| chr4 | 15717134 | 15717182 | CSAR_peak_ | 8.39           | - |
| chr4 | 15717480 | 15717514 | CSAR_peak_ | 6.21           | - |
| chr4 | 15717701 | 15717758 | CSAR_peak_ | 7.27           | - |
| chr4 | 15751934 | 15751969 | CSAR_peak_ | 6.85           | - |
| chr4 | 15753089 | 15753153 | CSAR_peak_ | 7.27,6.21      | - |
| chr4 | 15796514 | 15796568 | CSAR_peak_ | 9.58           | - |
| chr4 | 15846242 | 15846290 | CSAR_peak_ | 7.27           | - |
| chr4 | 15846694 | 15846761 | CSAR_peak_ | 8.39           | - |
| chr4 | 15866396 | 15866454 | CSAR_peak_ | 8.39           | - |
| chr4 | 15867444 | 15867534 | CSAR_peak_ | 10.02          | - |

|      |          |          |            |               |   |
|------|----------|----------|------------|---------------|---|
| chr4 | 15867620 | 15867643 | CSAR_peak_ | 7.58          | - |
| chr4 | 15879546 | 15879581 | CSAR_peak_ | 9.58          | - |
| chr4 | 15879822 | 15879883 | CSAR_peak_ | 10.02,8.95    | - |
| chr4 | 15880165 | 15880203 | CSAR_peak_ | 6.44          | - |
| chr4 | 15888144 | 15888208 | CSAR_peak_ | 7.58          | - |
| chr4 | 15888599 | 15888643 | CSAR_peak_ | 7.27          | - |
| chr4 | 15889199 | 15889291 | CSAR_peak_ | 8.39          | - |
| chr4 | 15891196 | 15891228 | CSAR_peak_ | 6.21          | - |
| chr4 | 15892125 | 15892234 | CSAR_peak_ | 9.58,10.02    | - |
| chr4 | 15892625 | 15892730 | CSAR_peak_ | 7.27,6.85,7.2 | - |
| chr4 | 15892930 | 15892960 | CSAR_peak_ | 8.39          | - |
| chr4 | 15893660 | 15893704 | CSAR_peak_ | 9.58          | - |
| chr4 | 15893768 | 15893786 | CSAR_peak_ | 7.27          | - |
| chr4 | 15893881 | 15893914 | CSAR_peak_ | 7.27          | - |
| chr4 | 15893975 | 15894010 | CSAR_peak_ | 6.21          | - |
| chr4 | 15894312 | 15894372 | CSAR_peak_ | 6.57,7.58     | - |
| chr4 | 15895369 | 15895434 | CSAR_peak_ | 7.58          | - |
| chr4 | 15900390 | 15900434 | CSAR_peak_ | 7.27          | - |
| chr4 | 15900655 | 15900778 | CSAR_peak_ | 10.83,8.65,7. | - |
| chr4 | 15901048 | 15901058 | CSAR_peak_ | 9.58          | - |
| chr4 | 15901140 | 15901213 | CSAR_peak_ | 7.27          | - |
| chr4 | 15901225 | 15901271 | CSAR_peak_ | 6.21          | - |
| chr4 | 15901383 | 15901439 | CSAR_peak_ | 12.13,9.58    | - |
| chr4 | 15901455 | 15901559 | CSAR_peak_ | 19.36,9.77    | - |
| chr4 | 15901672 | 15901721 | CSAR_peak_ | 25.91,20.94   | - |
| chr4 | 15901834 | 15901892 | CSAR_peak_ | 12.27,14.76   | - |
| chr4 | 15902365 | 15902462 | CSAR_peak_ | 12.13         | - |
| chr4 | 15902559 | 15902623 | CSAR_peak_ | 8.65          | - |
| chr4 | 15902710 | 15902782 | CSAR_peak_ | 10.82,7.27,2. | - |
| chr4 | 15902934 | 15903016 | CSAR_peak_ | 7.27          | - |
| chr4 | 15927651 | 15927701 | CSAR_peak_ | 10.02         | - |
| chr4 | 15928328 | 15928424 | CSAR_peak_ | 9.58          | - |
| chr4 | 15929005 | 15929055 | CSAR_peak_ | 6.21          | - |
| chr4 | 15929406 | 15929455 | CSAR_peak_ | 7.27          | - |
| chr4 | 15930007 | 15930060 | CSAR_peak_ | 7.27          | - |
| chr4 | 15930140 | 15930196 | CSAR_peak_ | 16.33         | - |
| chr4 | 15930237 | 15930293 | CSAR_peak_ | 16.33         | - |
| chr4 | 15931075 | 15931126 | CSAR_peak_ | 6.21          | - |
| chr4 | 15945574 | 15945618 | CSAR_peak_ | 12.17         | - |
| chr4 | 15946124 | 15946178 | CSAR_peak_ | 12.17,8.95    | - |
| chr4 | 15946327 | 15946409 | CSAR_peak_ | 6.95          | - |
| chr4 | 15953006 | 15953087 | CSAR_peak_ | 7.27          | - |

|      |          |          |            |                |   |
|------|----------|----------|------------|----------------|---|
| chr4 | 15965161 | 15965250 | CSAR_peak_ | 7.27,8.39      | - |
| chr4 | 15966449 | 15966487 | CSAR_peak_ | 8.39           | - |
| chr4 | 15966611 | 15966661 | CSAR_peak_ | 8.39           | - |
| chr4 | 15966841 | 15966922 | CSAR_peak_ | 9.77,10.83     | - |
| chr4 | 15967722 | 15967780 | CSAR_peak_ | 7.27           | - |
| chr4 | 15967874 | 15967984 | CSAR_peak_ | 18.95,38.71    | - |
| chr4 | 15968302 | 15968311 | CSAR_peak_ | 5.86           | - |
| chr4 | 15968427 | 15968544 | CSAR_peak_ | 14.88,6.57,7.- | - |
| chr4 | 15968870 | 15968937 | CSAR_peak_ | 10.02,8.13     | - |
| chr4 | 15969082 | 15969170 | CSAR_peak_ | 19.36          | - |
| chr4 | 15969248 | 15969294 | CSAR_peak_ | 10.83,8.2,12.- | - |
| chr4 | 15969588 | 15969674 | CSAR_peak_ | 9.03,12.27     | - |
| chr4 | 15969737 | 15969778 | CSAR_peak_ | 6.03           | - |
| chr4 | 15970252 | 15970350 | CSAR_peak_ | 9.27,9.58      | - |
| chr4 | 15972784 | 15972838 | CSAR_peak_ | 9.58,6.21      | - |
| chr4 | 15985464 | 15985540 | CSAR_peak_ | 20.13,7.27     | - |
| chr4 | 15985653 | 15985724 | CSAR_peak_ | 12.31,12.17    | - |
| chr4 | 15985782 | 15985875 | CSAR_peak_ | 21.94,20.43    | - |
| chr4 | 15985885 | 15985959 | CSAR_peak_ | 20.76,21.22    | - |
| chr4 | 15986059 | 15986180 | CSAR_peak_ | 17.51,9.58,8.- | - |
| chr4 | 15986264 | 15986551 | CSAR_peak_ | 8.95,16.33,1.- | - |
| chr4 | 15986553 | 15986669 | CSAR_peak_ | 17.82,6.54,1.- | - |
| chr4 | 15986694 | 15986750 | CSAR_peak_ | 11.38          | - |
| chr4 | 15986778 | 15986830 | CSAR_peak_ | 8.39           | - |
| chr4 | 15986871 | 15986912 | CSAR_peak_ | 14.88          | - |
| chr4 | 15987001 | 15987037 | CSAR_peak_ | 16.33          | - |
| chr4 | 15987119 | 15987143 | CSAR_peak_ | 7.58           | - |
| chr4 | 15987266 | 15987384 | CSAR_peak_ | 13.51          | - |
| chr4 | 15987536 | 15987581 | CSAR_peak_ | 7.58           | - |
| chr4 | 15987706 | 15987782 | CSAR_peak_ | 7.29,7.7       | - |
| chr4 | 15987867 | 15987983 | CSAR_peak_ | 13.51,17.51    | - |
| chr4 | 15988028 | 15988086 | CSAR_peak_ | 10.31          | - |
| chr4 | 15988421 | 15988535 | CSAR_peak_ | 7.27,7.27,12.- | - |
| chr4 | 15989044 | 15989097 | CSAR_peak_ | 10.83          | - |
| chr4 | 15989158 | 15989240 | CSAR_peak_ | 12.13,12.13    | - |
| chr4 | 15989378 | 15989443 | CSAR_peak_ | 10.83,9.58     | - |
| chr4 | 15989811 | 15989856 | CSAR_peak_ | 10.31,7.27     | - |
| chr4 | 15989889 | 15989933 | CSAR_peak_ | 8.39           | - |
| chr4 | 15990387 | 15990581 | CSAR_peak_ | 8.28,14.93,8.- | - |
| chr4 | 15990780 | 15990897 | CSAR_peak_ | 12.13,20.94    | - |
| chr4 | 15991003 | 15991054 | CSAR_peak_ | 7.92           | - |
| chr4 | 15991064 | 15991082 | CSAR_peak_ | 6.21           | - |

|      |          |          |            |               |   |
|------|----------|----------|------------|---------------|---|
| chr4 | 16003417 | 16003473 | CSAR_peak_ | 10.83         | - |
| chr4 | 16003765 | 16003822 | CSAR_peak_ | 14.88,10.62   | - |
| chr4 | 16003896 | 16003941 | CSAR_peak_ | 6.44          | - |
| chr4 | 16005535 | 16005590 | CSAR_peak_ | 10.83         | - |
| chr4 | 16007330 | 16007339 | CSAR_peak_ | 7.58          | - |
| chr4 | 16007419 | 16007473 | CSAR_peak_ | 12.17,7.26,9. | - |
| chr4 | 16008678 | 16008714 | CSAR_peak_ | 8.13          | - |
| chr4 | 16009016 | 16009054 | CSAR_peak_ | 14.88         | - |
| chr4 | 16012194 | 16012244 | CSAR_peak_ | 8.2           | - |
| chr4 | 16012520 | 16012576 | CSAR_peak_ | 7.27,6.21     | - |
| chr4 | 16016157 | 16016248 | CSAR_peak_ | 7.27,5.86     | - |
| chr4 | 16016774 | 16016895 | CSAR_peak_ | 8.39          | - |
| chr4 | 16019455 | 16019517 | CSAR_peak_ | 7.27          | - |
| chr4 | 16019669 | 16019725 | CSAR_peak_ | 14.88         | - |
| chr4 | 16019886 | 16019984 | CSAR_peak_ | 12.13,7.27    | - |
| chr4 | 16020351 | 16020432 | CSAR_peak_ | 16.11,20.43   | - |
| chr4 | 16030628 | 16030683 | CSAR_peak_ | 8.39          | - |
| chr4 | 16031348 | 16031476 | CSAR_peak_ | 7.27,12.13,7. | - |
| chr4 | 16032180 | 16032230 | CSAR_peak_ | 7.27          | - |
| chr4 | 16032452 | 16032500 | CSAR_peak_ | 6.21,9.58     | - |
| chr4 | 16033058 | 16033104 | CSAR_peak_ | 7.58          | - |
| chr4 | 16033639 | 16033681 | CSAR_peak_ | 9.58          | - |
| chr4 | 16035788 | 16035862 | CSAR_peak_ | 6.21,27.73    | - |
| chr4 | 16035905 | 16035949 | CSAR_peak_ | 7.92          | - |
| chr4 | 16035971 | 16036057 | CSAR_peak_ | 9.58          | - |
| chr4 | 16036112 | 16036161 | CSAR_peak_ | 8.95          | - |
| chr4 | 16036217 | 16036270 | CSAR_peak_ | 7.58          | - |
| chr4 | 16036480 | 16036521 | CSAR_peak_ | 7.27          | - |
| chr4 | 16036680 | 16036733 | CSAR_peak_ | 9.58          | - |
| chr4 | 16037455 | 16037518 | CSAR_peak_ | 7.27          | - |
| chr4 | 16037975 | 16038004 | CSAR_peak_ | 6.03          | - |
| chr4 | 16048632 | 16048680 | CSAR_peak_ | 7.27          | - |
| chr4 | 16051238 | 16051288 | CSAR_peak_ | 16.33         | - |
| chr4 | 16052101 | 16052209 | CSAR_peak_ | 17.37         | - |
| chr4 | 16052289 | 16052296 | CSAR_peak_ | 7.27          | - |
| chr4 | 16052359 | 16052420 | CSAR_peak_ | 12.13         | - |
| chr4 | 16052437 | 16052481 | CSAR_peak_ | 7.27          | - |
| chr4 | 16052505 | 16052550 | CSAR_peak_ | 9.58          | - |
| chr4 | 16052637 | 16052686 | CSAR_peak_ | 8.39          | - |
| chr4 | 16053324 | 16053378 | CSAR_peak_ | 31.2,8.39     | - |
| chr4 | 16053412 | 16053443 | CSAR_peak_ | 8.65          | - |
| chr4 | 16053456 | 16053529 | CSAR_peak_ | 9.43,14.59    | - |

|      |          |          |            |                   |   |
|------|----------|----------|------------|-------------------|---|
| chr4 | 16056287 | 16056354 | CSAR_peak_ | 9.58              | - |
| chr4 | 16086801 | 16086842 | CSAR_peak_ | 7.27              | - |
| chr4 | 16086872 | 16086917 | CSAR_peak_ | 9.77              | - |
| chr4 | 16087059 | 16087147 | CSAR_peak_ | 20.94,19.36       | - |
| chr4 | 16087263 | 16087360 | CSAR_peak_ | 11.28,16.19       | - |
| chr4 | 16087381 | 16087454 | CSAR_peak_ | 7.27              | - |
| chr4 | 16087551 | 16087589 | CSAR_peak_ | 12.13             | - |
| chr4 | 16087601 | 16087744 | CSAR_peak_ | 14.76,7.29        | - |
| chr4 | 16087791 | 16087881 | CSAR_peak_ | 8.39              | - |
| chr4 | 16088000 | 16088044 | CSAR_peak_ | 7.58              | - |
| chr4 | 16088538 | 16088603 | CSAR_peak_ | 10.95,7.27        | - |
| chr4 | 16089674 | 16089733 | CSAR_peak_ | 10.31,7.27        | - |
| chr4 | 16089802 | 16089829 | CSAR_peak_ | 7.27              | - |
| chr4 | 16090204 | 16090245 | CSAR_peak_ | 7.58              | - |
| chr4 | 16101486 | 16101542 | CSAR_peak_ | 7.27              | - |
| chr4 | 16101753 | 16101849 | CSAR_peak_ | 7,8.14            | - |
| chr4 | 16101910 | 16101988 | CSAR_peak_ | 9.55,23.03,10.31  | - |
| chr4 | 16102011 | 16102047 | CSAR_peak_ | 9.8               | - |
| chr4 | 16102048 | 16102111 | CSAR_peak_ | 12.31,16.11       | - |
| chr4 | 16103327 | 16103353 | CSAR_peak_ | 7.27              | - |
| chr4 | 16103559 | 16103626 | CSAR_peak_ | 9.58              | - |
| chr4 | 16104031 | 16104114 | CSAR_peak_ | 8.39              | - |
| chr4 | 16105824 | 16105852 | CSAR_peak_ | 8.39              | - |
| chr4 | 16105929 | 16106009 | CSAR_peak_ | 5.86,16.33,20.94  | - |
| chr4 | 16109014 | 16109066 | CSAR_peak_ | 8.39              | - |
| chr4 | 16112883 | 16112924 | CSAR_peak_ | 8.39              | - |
| chr4 | 16112940 | 16113019 | CSAR_peak_ | 6.21              | - |
| chr4 | 16126628 | 16126685 | CSAR_peak_ | 7.58              | - |
| chr4 | 16126886 | 16126961 | CSAR_peak_ | 10.83,8.39        | - |
| chr4 | 16127335 | 16127437 | CSAR_peak_ | 7.27              | - |
| chr4 | 16127627 | 16127681 | CSAR_peak_ | 8.39              | - |
| chr4 | 16129233 | 16129272 | CSAR_peak_ | 7.27              | - |
| chr4 | 16129921 | 16129967 | CSAR_peak_ | 10.83             | - |
| chr4 | 16130060 | 16130108 | CSAR_peak_ | 12.13             | - |
| chr4 | 16153079 | 16153141 | CSAR_peak_ | 6.02,11.14        | - |
| chr4 | 16153269 | 16153407 | CSAR_peak_ | 20.07,17.68,10.31 | - |
| chr4 | 16153503 | 16153592 | CSAR_peak_ | 20.94,22.56       | - |
| chr4 | 16154022 | 16154069 | CSAR_peak_ | 14.76,7.29        | - |
| chr4 | 16154145 | 16154248 | CSAR_peak_ | 9.77,12.17        | - |
| chr4 | 16154349 | 16154416 | CSAR_peak_ | 7.58              | - |
| chr4 | 16154420 | 16154581 | CSAR_peak_ | 9.58,9.58,16.11   | - |
| chr4 | 16154654 | 16154715 | CSAR_peak_ | 17.37             | - |

|      |          |          |            |               |   |
|------|----------|----------|------------|---------------|---|
| chr4 | 16169684 | 16169774 | CSAR_peak_ | 7.27          | - |
| chr4 | 16169937 | 16169979 | CSAR_peak_ | 6.21          | - |
| chr4 | 16191881 | 16191932 | CSAR_peak_ | 9.58          | - |
| chr4 | 16192254 | 16192304 | CSAR_peak_ | 8.39          | - |
| chr4 | 16192326 | 16192358 | CSAR_peak_ | 7.27          | - |
| chr4 | 16192435 | 16192478 | CSAR_peak_ | 13.48         | - |
| chr4 | 16193000 | 16193059 | CSAR_peak_ | 7.27,6.21     | - |
| chr4 | 16193811 | 16193859 | CSAR_peak_ | 6.21          | - |
| chr4 | 16194756 | 16194788 | CSAR_peak_ | 6.21          | - |
| chr4 | 16196120 | 16196204 | CSAR_peak_ | 7.27          | - |
| chr4 | 16231971 | 16232008 | CSAR_peak_ | 6.21          | - |
| chr4 | 16234064 | 16234140 | CSAR_peak_ | 6.21,12.13    | - |
| chr4 | 16257512 | 16257559 | CSAR_peak_ | 9.58          | - |
| chr4 | 16257628 | 16257681 | CSAR_peak_ | 9.58          | - |
| chr4 | 16257884 | 16257949 | CSAR_peak_ | 17.82,16.33   | - |
| chr4 | 16257972 | 16258048 | CSAR_peak_ | 6.21          | - |
| chr4 | 16258278 | 16258322 | CSAR_peak_ | 6.81          | - |
| chr4 | 16258324 | 16258370 | CSAR_peak_ | 6.21          | - |
| chr4 | 16282328 | 16282391 | CSAR_peak_ | 7.58          | - |
| chr4 | 16282400 | 16282458 | CSAR_peak_ | 7.27          | - |
| chr4 | 16282521 | 16282584 | CSAR_peak_ | 13.48,10.02   | - |
| chr4 | 16283000 | 16283354 | CSAR_peak_ | 8.02,31.29,8. | - |
| chr4 | 16283402 | 16283466 | CSAR_peak_ | 10.18,8.12    | - |
| chr4 | 16283657 | 16284234 | CSAR_peak_ | 49.47,28.11,; | - |
| chr4 | 16284268 | 16284441 | CSAR_peak_ | 22.56,9.77    | - |
| chr4 | 16284600 | 16284645 | CSAR_peak_ | 17.4          | - |
| chr4 | 16284681 | 16284749 | CSAR_peak_ | 6.02,6.21     | - |
| chr4 | 16284791 | 16284843 | CSAR_peak_ | 20.43,25.18   | - |
| chr4 | 16284865 | 16284938 | CSAR_peak_ | 14.3,21.59    | - |
| chr4 | 16284947 | 16285008 | CSAR_peak_ | 12.17,8.28    | - |
| chr4 | 16288340 | 16288421 | CSAR_peak_ | 8.39,9.77     | - |
| chr4 | 16288485 | 16288586 | CSAR_peak_ | 9.58,13.48    | - |
| chr4 | 16288688 | 16288860 | CSAR_peak_ | 6.44,14.88    | - |
| chr4 | 16298659 | 16298789 | CSAR_peak_ | 14.88         | - |
| chr4 | 16298942 | 16298986 | CSAR_peak_ | 7.27          | - |
| chr4 | 16299261 | 16299337 | CSAR_peak_ | 8.65,11.96    | - |
| chr4 | 16299985 | 16300025 | CSAR_peak_ | 7.27          | - |
| chr4 | 16300163 | 16300269 | CSAR_peak_ | 9.03          | - |
| chr4 | 16300488 | 16300551 | CSAR_peak_ | 8.39          | - |
| chr4 | 16300640 | 16300679 | CSAR_peak_ | 8.39          | - |
| chr4 | 16305170 | 16305228 | CSAR_peak_ | 6.57,10.57    | - |
| chr4 | 16305304 | 16305344 | CSAR_peak_ | 20.94         | - |

|      |          |          |            |               |   |
|------|----------|----------|------------|---------------|---|
| chr4 | 16305749 | 16305793 | CSAR_peak_ | 7.27          | - |
| chr4 | 16307510 | 16307573 | CSAR_peak_ | 8.39          | - |
| chr4 | 16345921 | 16345946 | CSAR_peak_ | 7.27          | - |
| chr4 | 16346382 | 16346434 | CSAR_peak_ | 7.27          | - |
| chr4 | 16348244 | 16348295 | CSAR_peak_ | 6.57          | - |
| chr4 | 16348335 | 16348571 | CSAR_peak_ | 10.82,14.22,  | - |
| chr4 | 16348575 | 16348818 | CSAR_peak_ | 10.95,8.39,1  | - |
| chr4 | 16348858 | 16348962 | CSAR_peak_ | 11.03,16.11,  | - |
| chr4 | 16349014 | 16349096 | CSAR_peak_ | 6.21          | - |
| chr4 | 16349100 | 16349301 | CSAR_peak_ | 14.88,6.44,6. | - |
| chr4 | 16370187 | 16370267 | CSAR_peak_ | 9.55,9.48,14. | - |
| chr4 | 16374150 | 16374226 | CSAR_peak_ | 12.17         | - |
| chr4 | 16388275 | 16388334 | CSAR_peak_ | 6.03,5.86,6.2 | - |
| chr4 | 16388438 | 16388509 | CSAR_peak_ | 19.8,13.92    | - |
| chr4 | 16428674 | 16428756 | CSAR_peak_ | 11.14,12.13   | - |
| chr4 | 16428834 | 16428888 | CSAR_peak_ | 16.34,7.27    | - |
| chr4 | 16428994 | 16429180 | CSAR_peak_ | 14.88,10.31,  | - |
| chr4 | 16429268 | 16429314 | CSAR_peak_ | 12.17         | - |
| chr4 | 16429457 | 16429478 | CSAR_peak_ | 6.03          | - |
| chr4 | 16429653 | 16429707 | CSAR_peak_ | 8.39          | - |
| chr4 | 16429793 | 16429861 | CSAR_peak_ | 7.27          | - |
| chr4 | 16430026 | 16430067 | CSAR_peak_ | 16.54         | - |
| chr4 | 16430074 | 16430235 | CSAR_peak_ | 14.76,10.96,  | - |
| chr4 | 16430284 | 16430362 | CSAR_peak_ | 6.95,6.57     | - |
| chr4 | 16430414 | 16430512 | CSAR_peak_ | 13.44,12.13   | - |
| chr4 | 16430651 | 16430699 | CSAR_peak_ | 7.27          | - |
| chr4 | 16430762 | 16430843 | CSAR_peak_ | 8.39,8.65     | - |
| chr4 | 16477386 | 16477447 | CSAR_peak_ | 6.21,5.62     | - |
| chr4 | 16477521 | 16477645 | CSAR_peak_ | 7,9.41,9.55,6 | - |
| chr4 | 16477724 | 16477772 | CSAR_peak_ | 7.27          | - |
| chr4 | 16477913 | 16477983 | CSAR_peak_ | 12.31,9.58    | - |
| chr4 | 16478344 | 16478402 | CSAR_peak_ | 6.21          | - |
| chr4 | 16478726 | 16478828 | CSAR_peak_ | 7.27,7.27,8.1 | - |
| chr4 | 16479049 | 16479108 | CSAR_peak_ | 7.27          | - |
| chr4 | 16481787 | 16481851 | CSAR_peak_ | 16.08,7.27    | - |
| chr4 | 16481992 | 16482031 | CSAR_peak_ | 7.27          | - |
| chr4 | 16482278 | 16482319 | CSAR_peak_ | 18.73         | - |
| chr4 | 16482874 | 16482937 | CSAR_peak_ | 13.48         | - |
| chr4 | 16483100 | 16483151 | CSAR_peak_ | 13.51         | - |
| chr4 | 16483440 | 16483469 | CSAR_peak_ | 9.58          | - |
| chr4 | 16483541 | 16483571 | CSAR_peak_ | 7.27,6.57     | - |
| chr4 | 16489102 | 16489166 | CSAR_peak_ | 7.27          | - |



|      |          |          |            |               |   |
|------|----------|----------|------------|---------------|---|
| chr4 | 16534984 | 16535025 | CSAR_peak_ | 7.58          | - |
| chr4 | 16545691 | 16545712 | CSAR_peak_ | 6.21          | - |
| chr4 | 16547301 | 16547326 | CSAR_peak_ | 9.58          | - |
| chr4 | 16547346 | 16547396 | CSAR_peak_ | 9.58          | - |
| chr4 | 16560802 | 16560856 | CSAR_peak_ | 12.13         | - |
| chr4 | 16560962 | 16561042 | CSAR_peak_ | 14.88,13.48   | - |
| chr4 | 16561121 | 16561164 | CSAR_peak_ | 9.58          | - |
| chr4 | 16561338 | 16561435 | CSAR_peak_ | 17.37,10.02   | - |
| chr4 | 16561606 | 16561753 | CSAR_peak_ | 13.44,7.27    | - |
| chr4 | 16561768 | 16561873 | CSAR_peak_ | 28.34,17.37   | - |
| chr4 | 16562097 | 16562159 | CSAR_peak_ | 7.27          | - |
| chr4 | 16562232 | 16562263 | CSAR_peak_ | 10.83         | - |
| chr4 | 16562400 | 16562527 | CSAR_peak_ | 16.05,15.28   | - |
| chr4 | 16562709 | 16562717 | CSAR_peak_ | 6.57          | - |
| chr4 | 16562747 | 16562818 | CSAR_peak_ | 15.68,12.17   | - |
| chr4 | 16568345 | 16568356 | CSAR_peak_ | 16.11,16.33   | - |
| chr4 | 16568453 | 16568523 | CSAR_peak_ | 21.94,9.41    | - |
| chr4 | 16568648 | 16568691 | CSAR_peak_ | 7.58          | - |
| chr4 | 16573361 | 16573463 | CSAR_peak_ | 7.27,6.81,5.8 | - |
| chr4 | 16599978 | 16600042 | CSAR_peak_ | 7.27          | - |
| chr4 | 16600164 | 16600208 | CSAR_peak_ | 9.58          | - |
| chr4 | 16602885 | 16602939 | CSAR_peak_ | 10.95         | - |
| chr4 | 16603459 | 16603537 | CSAR_peak_ | 16.33,10.31   | - |
| chr4 | 16603926 | 16603968 | CSAR_peak_ | 8.95          | - |
| chr4 | 16604298 | 16604356 | CSAR_peak_ | 14.88         | - |
| chr4 | 16619105 | 16619196 | CSAR_peak_ | 14.88         | - |
| chr4 | 16619315 | 16619373 | CSAR_peak_ | 7.27,12.13    | - |
| chr4 | 16620779 | 16620840 | CSAR_peak_ | 7.92,10.83    | - |
| chr4 | 16620902 | 16620967 | CSAR_peak_ | 7.27          | - |
| chr4 | 16620999 | 16621071 | CSAR_peak_ | 12.13,9.58    | - |
| chr4 | 16621430 | 16621490 | CSAR_peak_ | 6.02          | - |
| chr4 | 16621533 | 16621599 | CSAR_peak_ | 9.77          | - |
| chr4 | 16621697 | 16621728 | CSAR_peak_ | 14.88         | - |
| chr4 | 16621998 | 16622042 | CSAR_peak_ | 7.58,9.77     | - |
| chr4 | 16624190 | 16624238 | CSAR_peak_ | 8.65,6.21     | - |
| chr4 | 16624395 | 16624432 | CSAR_peak_ | 6.21          | - |
| chr4 | 16624471 | 16624489 | CSAR_peak_ | 19.36,7.92    | - |
| chr4 | 16624857 | 16624903 | CSAR_peak_ | 10.83         | - |
| chr4 | 16643695 | 16643746 | CSAR_peak_ | 6.45          | - |
| chr4 | 16643821 | 16643841 | CSAR_peak_ | 6.21          | - |
| chr4 | 16657164 | 16657226 | CSAR_peak_ | 7.27          | - |
| chr4 | 16664985 | 16665072 | CSAR_peak_ | 9.58          | - |

|      |          |          |            |               |   |
|------|----------|----------|------------|---------------|---|
| chr4 | 16665587 | 16665638 | CSAR_peak_ | 6.57          | - |
| chr4 | 16665647 | 16665707 | CSAR_peak_ | 9.58,16.19    | - |
| chr4 | 16665831 | 16665911 | CSAR_peak_ | 6.03,8.39,6.8 | - |
| chr4 | 16665994 | 16666063 | CSAR_peak_ | 13.66,9.61    | - |
| chr4 | 16666327 | 16666393 | CSAR_peak_ | 11.38,8.2,6.2 | - |
| chr4 | 16666612 | 16666649 | CSAR_peak_ | 6.21          | - |
| chr4 | 16667219 | 16667278 | CSAR_peak_ | 7.58          | - |
| chr4 | 16700911 | 16700987 | CSAR_peak_ | 6.03,9.61     | - |
| chr4 | 16701301 | 16701356 | CSAR_peak_ | 8.09          | - |
| chr4 | 16701635 | 16701676 | CSAR_peak_ | 9.77,13.51    | - |
| chr4 | 16701719 | 16701761 | CSAR_peak_ | 6.21          | - |
| chr4 | 16701943 | 16701976 | CSAR_peak_ | 6.03          | - |
| chr4 | 16702043 | 16702106 | CSAR_peak_ | 10.83         | - |
| chr4 | 16702694 | 16702757 | CSAR_peak_ | 6.21          | - |
| chr4 | 16702844 | 16702888 | CSAR_peak_ | 10.83,7.58    | - |
| chr4 | 16731132 | 16731242 | CSAR_peak_ | 22.58,10.02   | - |
| chr4 | 16731286 | 16731336 | CSAR_peak_ | 9.58          | - |
| chr4 | 16732002 | 16732079 | CSAR_peak_ | 7.27,12.13    | - |
| chr4 | 16755930 | 16755980 | CSAR_peak_ | 25.91         | - |
| chr4 | 16757196 | 16757223 | CSAR_peak_ | 6.21          | - |
| chr4 | 16757701 | 16757754 | CSAR_peak_ | 8.39          | - |
| chr4 | 16761504 | 16761562 | CSAR_peak_ | 9.58          | - |
| chr4 | 16761716 | 16761798 | CSAR_peak_ | 8.14          | - |
| chr4 | 16762415 | 16762543 | CSAR_peak_ | 7.27,9.58,8.3 | - |
| chr4 | 16762644 | 16762654 | CSAR_peak_ | 7.27          | - |
| chr4 | 16762961 | 16763067 | CSAR_peak_ | 9.77,17.82    | - |
| chr4 | 16763144 | 16763208 | CSAR_peak_ | 6.21          | - |
| chr4 | 16771235 | 16771274 | CSAR_peak_ | 6.21          | - |
| chr4 | 16771927 | 16771982 | CSAR_peak_ | 7.27          | - |
| chr4 | 16772159 | 16772201 | CSAR_peak_ | 8.95          | - |
| chr4 | 16772700 | 16772750 | CSAR_peak_ | 12.17         | - |
| chr4 | 16775724 | 16775815 | CSAR_peak_ | 10.82,14.88   | - |
| chr4 | 16798097 | 16798132 | CSAR_peak_ | 6.21          | - |
| chr4 | 16798182 | 16798196 | CSAR_peak_ | 7.27          | - |
| chr4 | 16798270 | 16798322 | CSAR_peak_ | 8.14,7.27,8.3 | - |
| chr4 | 16799049 | 16799100 | CSAR_peak_ | 14.88         | - |
| chr4 | 16812631 | 16812666 | CSAR_peak_ | 7.92          | - |
| chr4 | 16813608 | 16813693 | CSAR_peak_ | 17.82         | - |
| chr4 | 16834685 | 16834791 | CSAR_peak_ | 13.48         | - |
| chr4 | 16835301 | 16835336 | CSAR_peak_ | 10.95         | - |
| chr4 | 16835337 | 16835436 | CSAR_peak_ | 12.59,8.2,8.3 | - |
| chr4 | 16835494 | 16835537 | CSAR_peak_ | 6.44,9.58,6.8 | - |

|      |          |          |            |               |   |
|------|----------|----------|------------|---------------|---|
| chr4 | 16835574 | 16835627 | CSAR_peak_ | 8.39          | - |
| chr4 | 16836990 | 16837058 | CSAR_peak_ | 10.95,6.95    | - |
| chr4 | 16837509 | 16837577 | CSAR_peak_ | 7.27          | - |
| chr4 | 16837866 | 16837907 | CSAR_peak_ | 7.27          | - |
| chr4 | 16851812 | 16851853 | CSAR_peak_ | 6.21          | - |
| chr4 | 16851975 | 16852041 | CSAR_peak_ | 21.35,14.76   | - |
| chr4 | 16852447 | 16852514 | CSAR_peak_ | 6.21,8.39     | - |
| chr4 | 16852775 | 16852858 | CSAR_peak_ | 7.27          | - |
| chr4 | 16887371 | 16887439 | CSAR_peak_ | 7.92,6.74,6.6 | - |
| chr4 | 16887509 | 16887590 | CSAR_peak_ | 17.68,9.58    | - |
| chr4 | 16887658 | 16887711 | CSAR_peak_ | 14.76,9.55,1  | - |
| chr4 | 16887815 | 16887847 | CSAR_peak_ | 8.28          | - |
| chr4 | 16887998 | 16888056 | CSAR_peak_ | 5.9           | - |
| chr4 | 16888138 | 16888202 | CSAR_peak_ | 18.65         | - |
| chr4 | 16888287 | 16888308 | CSAR_peak_ | 8.95          | - |
| chr4 | 16888652 | 16888706 | CSAR_peak_ | 5.86          | - |
| chr4 | 16888890 | 16888945 | CSAR_peak_ | 6.81,8.39     | - |
| chr4 | 16889090 | 16889145 | CSAR_peak_ | 13.69,6.21,1  | - |
| chr4 | 16936535 | 16936576 | CSAR_peak_ | 8.39          | - |
| chr4 | 16936634 | 16936707 | CSAR_peak_ | 25.91,7.27    | - |
| chr4 | 16937299 | 16937465 | CSAR_peak_ | 12.31,7,16.3  | - |
| chr4 | 16937629 | 16937695 | CSAR_peak_ | 10.83         | - |
| chr4 | 16938176 | 16938240 | CSAR_peak_ | 17.82,13.48   | - |
| chr4 | 16938556 | 16938612 | CSAR_peak_ | 10.83         | - |
| chr4 | 16938656 | 16938729 | CSAR_peak_ | 6.21,7.27     | - |
| chr4 | 16939271 | 16939359 | CSAR_peak_ | 5.86,18.95,1  | - |
| chr4 | 16940017 | 16940092 | CSAR_peak_ | 8.39,12.31    | - |
| chr4 | 16940258 | 16940310 | CSAR_peak_ | 10.83         | - |
| chr4 | 16940555 | 16940623 | CSAR_peak_ | 6.21,8.95     | - |
| chr4 | 16940659 | 16940790 | CSAR_peak_ | 39.92,27.77   | - |
| chr4 | 16940887 | 16941001 | CSAR_peak_ | 17.87,6.54    | - |
| chr4 | 16941042 | 16941070 | CSAR_peak_ | 7.65          | - |
| chr4 | 16941084 | 16941162 | CSAR_peak_ | 13.69,7.27,6  | - |
| chr4 | 16941200 | 16941237 | CSAR_peak_ | 25.91         | - |
| chr4 | 16941272 | 16941346 | CSAR_peak_ | 12.94,10.94   | - |
| chr4 | 16941411 | 16941465 | CSAR_peak_ | 9.77,10.83    | - |
| chr4 | 16941546 | 16941733 | CSAR_peak_ | 20.18,5.79,2  | - |
| chr4 | 16941934 | 16942029 | CSAR_peak_ | 20.43,12.17   | - |
| chr4 | 16942048 | 16942075 | CSAR_peak_ | 7.27          | - |
| chr4 | 16942347 | 16942413 | CSAR_peak_ | 12.13,16.33   | - |
| chr4 | 16942775 | 16942823 | CSAR_peak_ | 7.27          | - |
| chr4 | 16942896 | 16943034 | CSAR_peak_ | 13.51,17.4,1  | - |

|      |          |          |            |                |   |
|------|----------|----------|------------|----------------|---|
| chr4 | 16943124 | 16943153 | CSAR_peak_ | 6.57           | - |
| chr4 | 16943762 | 16943869 | CSAR_peak_ | 9.58,7.92      | - |
| chr4 | 16944253 | 16944333 | CSAR_peak_ | 16.11          | - |
| chr4 | 16946930 | 16947037 | CSAR_peak_ | 25.62,30.02    | - |
| chr4 | 16947095 | 16947176 | CSAR_peak_ | 13.48,7.27     | - |
| chr4 | 16947233 | 16947343 | CSAR_peak_ | 11.03,19.36,(- | - |
| chr4 | 16947412 | 16947508 | CSAR_peak_ | 11.63,11.06,(- | - |
| chr4 | 16947668 | 16947724 | CSAR_peak_ | 8.39,7.26,5.8- | - |
| chr4 | 16947947 | 16948128 | CSAR_peak_ | 7.27,9.58,9.5- | - |
| chr4 | 16948320 | 16948428 | CSAR_peak_ | 7.27,18.73,1(- | - |
| chr4 | 16948498 | 16948634 | CSAR_peak_ | 6.02,30.34,1(- | - |
| chr4 | 16949718 | 16949790 | CSAR_peak_ | 9.58           | - |
| chr4 | 16949861 | 16949925 | CSAR_peak_ | 8.65,7.27      | - |
| chr4 | 16950013 | 16950085 | CSAR_peak_ | 13.66,8.13     | - |
| chr4 | 16953387 | 16953425 | CSAR_peak_ | 8.09           | - |
| chr4 | 16953515 | 16953555 | CSAR_peak_ | 5.86,8.39      | - |
| chr4 | 16953970 | 16954022 | CSAR_peak_ | 8.39,9.58      | - |
| chr4 | 16954234 | 16954287 | CSAR_peak_ | 12.13,17.82,(- | - |
| chr4 | 16954299 | 16954322 | CSAR_peak_ | 7.58           | - |
| chr4 | 16954330 | 16954357 | CSAR_peak_ | 6.21           | - |
| chr4 | 16954429 | 16954467 | CSAR_peak_ | 17.82          | - |
| chr4 | 16955028 | 16955051 | CSAR_peak_ | 8.39           | - |
| chr4 | 16955121 | 16955157 | CSAR_peak_ | 7.27           | - |
| chr4 | 16955501 | 16955540 | CSAR_peak_ | 6.21           | - |
| chr4 | 16955810 | 16955894 | CSAR_peak_ | 7.34           | - |
| chr4 | 16955978 | 16956079 | CSAR_peak_ | 17.82,29.2     | - |
| chr4 | 16956353 | 16956455 | CSAR_peak_ | 19.36,12.31    | - |
| chr4 | 16956459 | 16956529 | CSAR_peak_ | 8.92,5.95      | - |
| chr4 | 16956787 | 16956837 | CSAR_peak_ | 14.88          | - |
| chr4 | 16956952 | 16957082 | CSAR_peak_ | 40.66,24.21    | - |
| chr4 | 16957106 | 16957177 | CSAR_peak_ | 27.16,9.58,8.- | - |
| chr4 | 16957405 | 16957457 | CSAR_peak_ | 6.85           | - |
| chr4 | 16957591 | 16957665 | CSAR_peak_ | 7.06,14.34     | - |
| chr4 | 16957758 | 16957922 | CSAR_peak_ | 7.27,9.41,14.- | - |
| chr4 | 16957957 | 16958125 | CSAR_peak_ | 14.92,30.21,(- | - |
| chr4 | 16958152 | 16958255 | CSAR_peak_ | 13.85,17.4     | - |
| chr4 | 16958283 | 16958375 | CSAR_peak_ | 11.14,13.48    | - |
| chr4 | 16958517 | 16958574 | CSAR_peak_ | 10.83,7.27     | - |
| chr4 | 16958657 | 16958728 | CSAR_peak_ | 9.58,7.27      | - |
| chr4 | 16958925 | 16959015 | CSAR_peak_ | 27.64,6.64     | - |
| chr4 | 16959016 | 16959073 | CSAR_peak_ | 7.27,8.39      | - |
| chr4 | 16959199 | 16959359 | CSAR_peak_ | 14.88          | - |

|      |          |          |            |                |   |
|------|----------|----------|------------|----------------|---|
| chr4 | 16959837 | 16959891 | CSAR_peak_ | 7.26           | - |
| chr4 | 16960129 | 16960231 | CSAR_peak_ | 9.58           | - |
| chr4 | 16961092 | 16961210 | CSAR_peak_ | 33.47,7.92     | - |
| chr4 | 16962497 | 16962590 | CSAR_peak_ | 9.58           | - |
| chr4 | 16962820 | 16962892 | CSAR_peak_ | 9.58           | - |
| chr4 | 16962957 | 16963089 | CSAR_peak_ | 20.94,14.88,,- | - |
| chr4 | 16963141 | 16963226 | CSAR_peak_ | 7.58,9.58      | - |
| chr4 | 16963961 | 16964048 | CSAR_peak_ | 6.21           | - |
| chr4 | 16964065 | 16964190 | CSAR_peak_ | 22.56,8.39     | - |
| chr4 | 16964218 | 16964352 | CSAR_peak_ | 14.88,24.21    | - |
| chr4 | 16964371 | 16964442 | CSAR_peak_ | 9.41           | - |
| chr4 | 16964585 | 16964637 | CSAR_peak_ | 9.58           | - |
| chr4 | 16964722 | 16964791 | CSAR_peak_ | 12.74,18.65    | - |
| chr4 | 16965408 | 16965444 | CSAR_peak_ | 16.33          | - |
| chr4 | 16965538 | 16965582 | CSAR_peak_ | 12.13          | - |
| chr4 | 16965943 | 16966015 | CSAR_peak_ | 16.33,16.08    | - |
| chr4 | 16966024 | 16966111 | CSAR_peak_ | 6.21,12.13     | - |
| chr4 | 16966212 | 16966253 | CSAR_peak_ | 6.21           | - |
| chr4 | 16966314 | 16966364 | CSAR_peak_ | 10.83          | - |
| chr4 | 16966847 | 16966884 | CSAR_peak_ | 14.88          | - |
| chr4 | 16966961 | 16967014 | CSAR_peak_ | 7.58           | - |
| chr4 | 16967038 | 16967115 | CSAR_peak_ | 9.58,6.21      | - |
| chr4 | 16967355 | 16967429 | CSAR_peak_ | 9.58           | - |
| chr4 | 16967499 | 16967535 | CSAR_peak_ | 9.77           | - |
| chr4 | 16967886 | 16967923 | CSAR_peak_ | 6.21           | - |
| chr4 | 16967980 | 16968049 | CSAR_peak_ | 7.27           | - |
| chr4 | 16972108 | 16972172 | CSAR_peak_ | 7.27           | - |
| chr4 | 16972559 | 16972603 | CSAR_peak_ | 12.31          | - |
| chr4 | 16973031 | 16973182 | CSAR_peak_ | 34.89,7.58,9.- | - |
| chr4 | 16973183 | 16973459 | CSAR_peak_ | 15.56,32.17,,- | - |
| chr4 | 16973500 | 16973532 | CSAR_peak_ | 7.27           | - |
| chr4 | 16973545 | 16973599 | CSAR_peak_ | 5.93,7.5       | - |
| chr4 | 16973633 | 16973676 | CSAR_peak_ | 7.92           | - |
| chr4 | 16973840 | 16973862 | CSAR_peak_ | 9.58           | - |
| chr4 | 16973940 | 16974150 | CSAR_peak_ | 22.52,7.58,2(- | - |
| chr4 | 16974154 | 16974178 | CSAR_peak_ | 6.95           | - |
| chr4 | 16974201 | 16974256 | CSAR_peak_ | 7.27           | - |
| chr4 | 16974273 | 16974420 | CSAR_peak_ | 15.42,32.27,,- | - |
| chr4 | 16974509 | 16974643 | CSAR_peak_ | 22.58,33.03    | - |
| chr4 | 16974681 | 16974866 | CSAR_peak_ | 7.52,19.96,1,- | - |
| chr4 | 16974907 | 16974942 | CSAR_peak_ | 26.97          | - |
| chr4 | 16974960 | 16975063 | CSAR_peak_ | 11.63,9.58     | - |

|      |          |          |            |               |   |
|------|----------|----------|------------|---------------|---|
| chr4 | 16975097 | 16975187 | CSAR_peak_ | 24.52,17.82   | - |
| chr4 | 16975250 | 16975310 | CSAR_peak_ | 36.78,25.34   | - |
| chr4 | 16975346 | 16975403 | CSAR_peak_ | 11.66,12.13   | - |
| chr4 | 16975410 | 16975460 | CSAR_peak_ | 7.4           | - |
| chr4 | 16975533 | 16975779 | CSAR_peak_ | 14.08,15.45,  | - |
| chr4 | 16975815 | 16975971 | CSAR_peak_ | 20.54,17.8,10 | - |
| chr4 | 16976007 | 16976111 | CSAR_peak_ | 18.89,21.37   | - |
| chr4 | 16976155 | 16976284 | CSAR_peak_ | 19.64,26.54   | - |
| chr4 | 16976435 | 16976544 | CSAR_peak_ | 26.65,6.13,30 | - |
| chr4 | 16976704 | 16976758 | CSAR_peak_ | 12.35,7.13    | - |
| chr4 | 16976770 | 16976823 | CSAR_peak_ | 10.25,6.74    | - |
| chr4 | 16976847 | 16976864 | CSAR_peak_ | 13.29         | - |
| chr4 | 16976865 | 16977020 | CSAR_peak_ | 8.14,27.86,20 | - |
| chr4 | 16977120 | 16977134 | CSAR_peak_ | 7.58          | - |
| chr4 | 16977225 | 16977330 | CSAR_peak_ | 13.51,17.51   | - |
| chr4 | 16977422 | 16977438 | CSAR_peak_ | 6.44          | - |
| chr4 | 16977496 | 16977829 | CSAR_peak_ | 39.34,28.94,  | - |
| chr4 | 16977946 | 16977985 | CSAR_peak_ | 14.88,9.58    | - |
| chr4 | 16986919 | 16986961 | CSAR_peak_ | 7.27          | - |
| chr4 | 16987166 | 16987211 | CSAR_peak_ | 8.65,9.77     | - |
| chr4 | 16987319 | 16987381 | CSAR_peak_ | 5.86,7.27     | - |
| chr4 | 16987481 | 16987521 | CSAR_peak_ | 6.81          | - |
| chr4 | 16987658 | 16987686 | CSAR_peak_ | 6.45          | - |
| chr4 | 16988048 | 16988078 | CSAR_peak_ | 7.27          | - |
| chr4 | 16988104 | 16988131 | CSAR_peak_ | 12.13         | - |
| chr4 | 16988540 | 16988555 | CSAR_peak_ | 9.58          | - |
| chr4 | 17025062 | 17025122 | CSAR_peak_ | 8.28          | - |
| chr4 | 17025208 | 17025240 | CSAR_peak_ | 12.17         | - |
| chr4 | 17028539 | 17028633 | CSAR_peak_ | 10.83         | - |
| chr4 | 17032433 | 17032635 | CSAR_peak_ | 15.28,15.28,  | - |
| chr4 | 17032720 | 17032759 | CSAR_peak_ | 12.13,12.17   | - |
| chr4 | 17032955 | 17033085 | CSAR_peak_ | 31.2,13.92    | - |
| chr4 | 17033132 | 17033207 | CSAR_peak_ | 23.03,6.12    | - |
| chr4 | 17033355 | 17033396 | CSAR_peak_ | 6.03          | - |
| chr4 | 17039330 | 17039424 | CSAR_peak_ | 6.21,20.94    | - |
| chr4 | 17040088 | 17040130 | CSAR_peak_ | 7.58          | - |
| chr4 | 17040227 | 17040326 | CSAR_peak_ | 17.82,7.58    | - |
| chr4 | 17040349 | 17040537 | CSAR_peak_ | 12.17,15.37,  | - |
| chr4 | 17040540 | 17040751 | CSAR_peak_ | 14.88,10.83   | - |
| chr4 | 17043493 | 17043537 | CSAR_peak_ | 7.58          | - |
| chr4 | 17043684 | 17043737 | CSAR_peak_ | 8.39,9.58     | - |
| chr4 | 17044287 | 17044343 | CSAR_peak_ | 6.21,7.27     | - |

|      |          |          |            |               |   |
|------|----------|----------|------------|---------------|---|
| chr4 | 17045335 | 17045410 | CSAR_peak_ | 17.82         | - |
| chr4 | 17046124 | 17046174 | CSAR_peak_ | 6.21          | - |
| chr4 | 17046510 | 17046571 | CSAR_peak_ | 12.17,9.58    | - |
| chr4 | 17046733 | 17046778 | CSAR_peak_ | 7.27          | - |
| chr4 | 17047279 | 17047342 | CSAR_peak_ | 24.52         | - |
| chr4 | 17047901 | 17047981 | CSAR_peak_ | 10.83         | - |
| chr4 | 17048185 | 17048364 | CSAR_peak_ | 42.64,18.65,  | - |
| chr4 | 17048579 | 17048730 | CSAR_peak_ | 35.83,14.88   | - |
| chr4 | 17048842 | 17048890 | CSAR_peak_ | 12.13         | - |
| chr4 | 17048926 | 17049035 | CSAR_peak_ | 31.19,13.44   | - |
| chr4 | 17049044 | 17049177 | CSAR_peak_ | 7.27,13.48,9. | - |
| chr4 | 17049335 | 17049406 | CSAR_peak_ | 14.88,17.37   | - |
| chr4 | 17049488 | 17049830 | CSAR_peak_ | 8.36,60.49,5. | - |
| chr4 | 17049854 | 17050143 | CSAR_peak_ | 49.51,46.16   | - |
| chr4 | 17050184 | 17050259 | CSAR_peak_ | 19.21,21.56   | - |
| chr4 | 17052263 | 17052323 | CSAR_peak_ | 10.83         | - |
| chr4 | 17054041 | 17054086 | CSAR_peak_ | 7.27          | - |
| chr4 | 17054281 | 17054321 | CSAR_peak_ | 7.27          | - |
| chr4 | 17055006 | 17055046 | CSAR_peak_ | 6.21          | - |
| chr4 | 17064163 | 17064202 | CSAR_peak_ | 7.27          | - |
| chr4 | 17075126 | 17075165 | CSAR_peak_ | 7.27          | - |
| chr4 | 17076383 | 17076434 | CSAR_peak_ | 9.58          | - |
| chr4 | 17079459 | 17079512 | CSAR_peak_ | 13.48         | - |
| chr4 | 17079635 | 17079683 | CSAR_peak_ | 8.39          | - |
| chr4 | 17079956 | 17079979 | CSAR_peak_ | 6.21          | - |
| chr4 | 17095803 | 17095859 | CSAR_peak_ | 7.27          | - |
| chr4 | 17097357 | 17097411 | CSAR_peak_ | 14.88         | - |
| chr4 | 17099008 | 17099077 | CSAR_peak_ | 8.39          | - |
| chr4 | 17099280 | 17099406 | CSAR_peak_ | 7.27,33.03    | - |
| chr4 | 17099896 | 17099941 | CSAR_peak_ | 17.82,7.27    | - |
| chr4 | 17099993 | 17100051 | CSAR_peak_ | 17.82         | - |
| chr4 | 17100490 | 17100555 | CSAR_peak_ | 8.39,9.58     | - |
| chr4 | 17100891 | 17100941 | CSAR_peak_ | 7.27          | - |
| chr4 | 17101227 | 17101464 | CSAR_peak_ | 9.58,22.56,1. | - |
| chr4 | 17102041 | 17102082 | CSAR_peak_ | 7.27          | - |
| chr4 | 17102193 | 17102307 | CSAR_peak_ | 8.39,6.21,6.0 | - |
| chr4 | 17102608 | 17102749 | CSAR_peak_ | 28.34,6.45,2. | - |
| chr4 | 17103273 | 17103334 | CSAR_peak_ | 12.17,13.48   | - |
| chr4 | 17103572 | 17103598 | CSAR_peak_ | 8.39,11.38    | - |
| chr4 | 17103691 | 17103832 | CSAR_peak_ | 17.86,19.98   | - |
| chr4 | 17103910 | 17103996 | CSAR_peak_ | 12.13,33.03   | - |
| chr4 | 17104092 | 17104120 | CSAR_peak_ | 6.21          | - |

|      |          |          |            |                |   |
|------|----------|----------|------------|----------------|---|
| chr4 | 17169969 | 17170050 | CSAR_peak_ | 10.95,5.86     | - |
| chr4 | 17171392 | 17171440 | CSAR_peak_ | 9.58           | - |
| chr4 | 17171578 | 17171658 | CSAR_peak_ | 7.92,9.58      | - |
| chr4 | 17173071 | 17173130 | CSAR_peak_ | 9.58,6.57      | - |
| chr4 | 17180130 | 17180179 | CSAR_peak_ | 7.27           | - |
| chr4 | 17188889 | 17188957 | CSAR_peak_ | 19.36          | - |
| chr4 | 17189748 | 17189809 | CSAR_peak_ | 8.95,6.21      | - |
| chr4 | 17209011 | 17209059 | CSAR_peak_ | 14.88          | - |
| chr4 | 17225829 | 17225882 | CSAR_peak_ | 7.27           | - |
| chr4 | 17226195 | 17226262 | CSAR_peak_ | 9.58,20.43     | - |
| chr4 | 17226385 | 17226438 | CSAR_peak_ | 14.88          | - |
| chr4 | 17226460 | 17226522 | CSAR_peak_ | 26.69,14.88    | - |
| chr4 | 17230226 | 17230266 | CSAR_peak_ | 7              | - |
| chr4 | 17230295 | 17230348 | CSAR_peak_ | 12.5           | - |
| chr4 | 17230375 | 17230392 | CSAR_peak_ | 6.03           | - |
| chr4 | 17230998 | 17231026 | CSAR_peak_ | 7.27           | - |
| chr4 | 17231048 | 17231088 | CSAR_peak_ | 8.39           | - |
| chr4 | 17231178 | 17231244 | CSAR_peak_ | 12.74,6.02     | - |
| chr4 | 17231323 | 17231394 | CSAR_peak_ | 7.27,8.65      | - |
| chr4 | 17232077 | 17232145 | CSAR_peak_ | 8.39,10.83     | - |
| chr4 | 17232259 | 17232373 | CSAR_peak_ | 23.03,8.2,7.5- | - |
| chr4 | 17232555 | 17232661 | CSAR_peak_ | 17.82,20.94    | - |
| chr4 | 17232665 | 17232753 | CSAR_peak_ | 19.36,6.21     | - |
| chr4 | 17232766 | 17233525 | CSAR_peak_ | 13.48,5.86,5.- | - |
| chr4 | 17233780 | 17233986 | CSAR_peak_ | 8.14,12.17,9.- | - |
| chr4 | 17273608 | 17273654 | CSAR_peak_ | 9.58           | - |
| chr4 | 17277936 | 17277991 | CSAR_peak_ | 6.21           | - |
| chr4 | 17278374 | 17278426 | CSAR_peak_ | 8.39           | - |
| chr4 | 17280584 | 17280657 | CSAR_peak_ | 7.27           | - |
| chr4 | 17280719 | 17280802 | CSAR_peak_ | 7.73,14.88     | - |
| chr4 | 17280841 | 17280882 | CSAR_peak_ | 6.21           | - |
| chr4 | 17280975 | 17281146 | CSAR_peak_ | 7.27,9.58,9.7- | - |
| chr4 | 17281210 | 17281841 | CSAR_peak_ | 11.14,8.28,1(- | - |
| chr4 | 17281904 | 17281971 | CSAR_peak_ | 18.1,7.61      | - |
| chr4 | 17282069 | 17282088 | CSAR_peak_ | 6.21           | - |
| chr4 | 17282098 | 17282125 | CSAR_peak_ | 8.65           | - |
| chr4 | 17282321 | 17282609 | CSAR_peak_ | 14.51,17.41,-  | - |
| chr4 | 17282625 | 17282668 | CSAR_peak_ | 8.39           | - |
| chr4 | 17282950 | 17283042 | CSAR_peak_ | 7.27,25.91     | - |
| chr4 | 17283508 | 17283624 | CSAR_peak_ | 16.33,20.94    | - |
| chr4 | 17283878 | 17283980 | CSAR_peak_ | 17.4,12.13     | - |
| chr4 | 17283982 | 17284054 | CSAR_peak_ | 9.58,12.13     | - |



|      |          |          |            |                |   |
|------|----------|----------|------------|----------------|---|
| chr4 | 17284303 | 17284404 | CSAR_peak_ | 12.17,12.13    | - |
| chr4 | 17284921 | 17284994 | CSAR_peak_ | 19.36,12.17    | - |
| chr4 | 17285661 | 17285713 | CSAR_peak_ | 7.27           | - |
| chr4 | 17285956 | 17286011 | CSAR_peak_ | 10.31,7.27     | - |
| chr4 | 17286554 | 17286598 | CSAR_peak_ | 7.58           | - |
| chr4 | 17286714 | 17286735 | CSAR_peak_ | 6.21           | - |
| chr4 | 17286780 | 17286876 | CSAR_peak_ | 17.82,20.35    | - |
| chr4 | 17286893 | 17287126 | CSAR_peak_ | 10.95,7.27,8.- | - |
| chr4 | 17287129 | 17287226 | CSAR_peak_ | 14.85,7.29     | - |
| chr4 | 17287259 | 17287318 | CSAR_peak_ | 20.94          | - |
| chr4 | 17287446 | 17287463 | CSAR_peak_ | 6.21           | - |
| chr4 | 17287678 | 17287731 | CSAR_peak_ | 9.58           | - |
| chr4 | 17287882 | 17287959 | CSAR_peak_ | 10.02,6.85     | - |
| chr4 | 17287987 | 17288278 | CSAR_peak_ | 10.02,19.36,-  | - |
| chr4 | 17288364 | 17288413 | CSAR_peak_ | 6.21           | - |
| chr4 | 17288544 | 17288605 | CSAR_peak_ | 9.58,9.58      | - |
| chr4 | 17288730 | 17288770 | CSAR_peak_ | 8.39           | - |
| chr4 | 17288891 | 17289021 | CSAR_peak_ | 9.58,8.09,12.- | - |
| chr4 | 17289026 | 17289059 | CSAR_peak_ | 5.86           | - |
| chr4 | 17289384 | 17289446 | CSAR_peak_ | 17.82          | - |
| chr4 | 17289520 | 17289565 | CSAR_peak_ | 6.21,7.27      | - |
| chr4 | 17294034 | 17294091 | CSAR_peak_ | 7.27,9.58      | - |
| chr4 | 17294138 | 17294176 | CSAR_peak_ | 6.44           | - |
| chr4 | 17294363 | 17294451 | CSAR_peak_ | 8.39,9.32      | - |
| chr4 | 17294598 | 17294604 | CSAR_peak_ | 5.62           | - |
| chr4 | 17294680 | 17294783 | CSAR_peak_ | 13.6,25.65     | - |
| chr4 | 17294786 | 17294840 | CSAR_peak_ | 7.7            | - |
| chr4 | 17294966 | 17295132 | CSAR_peak_ | 25.08,37.83    | - |
| chr4 | 17295185 | 17295265 | CSAR_peak_ | 6.21,7.26      | - |
| chr4 | 17295287 | 17295331 | CSAR_peak_ | 6.21           | - |
| chr4 | 17295373 | 17295413 | CSAR_peak_ | 7.27           | - |
| chr4 | 17295533 | 17295646 | CSAR_peak_ | 12.13,7.91     | - |
| chr4 | 17295731 | 17295792 | CSAR_peak_ | 17.68,31.2     | - |
| chr4 | 17295885 | 17295916 | CSAR_peak_ | 6.21,12.13     | - |
| chr4 | 17296140 | 17296196 | CSAR_peak_ | 14.88,7.58     | - |
| chr4 | 17296489 | 17296534 | CSAR_peak_ | 9.58           | - |
| chr4 | 17296671 | 17296734 | CSAR_peak_ | 19.21,12.27    | - |
| chr4 | 17296830 | 17296892 | CSAR_peak_ | 12.6,30.35     | - |
| chr4 | 17297028 | 17297134 | CSAR_peak_ | 22.58,15.02    | - |
| chr4 | 17297214 | 17297225 | CSAR_peak_ | 7.29           | - |
| chr4 | 17297246 | 17297315 | CSAR_peak_ | 12.31,19.98,-  | - |
| chr4 | 17297496 | 17297651 | CSAR_peak_ | 27.75,32.74    | - |

|      |          |          |            |               |   |
|------|----------|----------|------------|---------------|---|
| chr4 | 17306230 | 17306290 | CSAR_peak_ | 9.58          | - |
| chr4 | 17308117 | 17308176 | CSAR_peak_ | 17.82,13.44   | - |
| chr4 | 17308363 | 17308434 | CSAR_peak_ | 6.85          | - |
| chr4 | 17308556 | 17308634 | CSAR_peak_ | 24.21,10.83   | - |
| chr4 | 17308727 | 17308798 | CSAR_peak_ | 9.58          | - |
| chr4 | 17308808 | 17308906 | CSAR_peak_ | 20.43,24.21   | - |
| chr4 | 17309026 | 17309264 | CSAR_peak_ | 32.46,27.11,1 | - |
| chr4 | 17309322 | 17309387 | CSAR_peak_ | 17.82,6.21    | - |
| chr4 | 17309392 | 17309521 | CSAR_peak_ | 14.88         | - |
| chr4 | 17309645 | 17309863 | CSAR_peak_ | 23,25.07      | - |
| chr4 | 17309868 | 17309980 | CSAR_peak_ | 20.13,11.22,1 | - |
| chr4 | 17310027 | 17310189 | CSAR_peak_ | 51.85,18.35   | - |
| chr4 | 17310228 | 17310361 | CSAR_peak_ | 11.06,23.69,1 | - |
| chr4 | 17310423 | 17310571 | CSAR_peak_ | 17.53,33.03   | - |
| chr4 | 17310631 | 17310704 | CSAR_peak_ | 42.64,8.39    | - |
| chr4 | 17310736 | 17310831 | CSAR_peak_ | 12.13,18.73   | - |
| chr4 | 17310885 | 17310941 | CSAR_peak_ | 7.27,6.95,6.1 | - |
| chr4 | 17310968 | 17311037 | CSAR_peak_ | 14.22,10.52   | - |
| chr4 | 17311172 | 17311354 | CSAR_peak_ | 10.83,9.55,1  | - |
| chr4 | 17311364 | 17311413 | CSAR_peak_ | 10.02,6.21    | - |
| chr4 | 17311421 | 17311611 | CSAR_peak_ | 24.21,6.1,6.8 | - |
| chr4 | 17311693 | 17311811 | CSAR_peak_ | 10.94,25.62   | - |
| chr4 | 17311902 | 17312095 | CSAR_peak_ | 7.27,28.94,1  | - |
| chr4 | 17312100 | 17312148 | CSAR_peak_ | 7.27          | - |
| chr4 | 17312207 | 17312370 | CSAR_peak_ | 18.17,13.92   | - |
| chr4 | 17333976 | 17334019 | CSAR_peak_ | 7.27          | - |
| chr4 | 17341322 | 17341375 | CSAR_peak_ | 7.27,6.95     | - |
| chr4 | 17341454 | 17341551 | CSAR_peak_ | 25.62,6.57    | - |
| chr4 | 17341841 | 17341908 | CSAR_peak_ | 16.33         | - |
| chr4 | 17341928 | 17341972 | CSAR_peak_ | 10.83         | - |
| chr4 | 17342037 | 17342052 | CSAR_peak_ | 6.21          | - |
| chr4 | 17342096 | 17342155 | CSAR_peak_ | 7.27          | - |
| chr4 | 17351774 | 17352063 | CSAR_peak_ | 33.47,15.2    | - |
| chr4 | 17352097 | 17352151 | CSAR_peak_ | 7.27,17.82    | - |
| chr4 | 17352602 | 17352670 | CSAR_peak_ | 7.27          | - |
| chr4 | 17352719 | 17352763 | CSAR_peak_ | 7.27          | - |
| chr4 | 17352801 | 17352949 | CSAR_peak_ | 33.47,22.56   | - |
| chr4 | 17352952 | 17353007 | CSAR_peak_ | 7.27,9.58     | - |
| chr4 | 17353018 | 17353127 | CSAR_peak_ | 30.25,28.34   | - |
| chr4 | 17353407 | 17353534 | CSAR_peak_ | 24.52,25.91   | - |
| chr4 | 17353612 | 17353826 | CSAR_peak_ | 31.72,16.08,1 | - |
| chr4 | 17353868 | 17353910 | CSAR_peak_ | 15.99,13.37   | - |

|      |          |          |            |                |    |
|------|----------|----------|------------|----------------|----|
| chr4 | 17354002 | 17354054 | CSAR_peak_ | 12.9,15.64     | -  |
| chr4 | 17354088 | 17354176 | CSAR_peak_ | 14.85,14.88,   | {- |
| chr4 | 17354185 | 17354250 | CSAR_peak_ | 15.42,24.21    | -  |
| chr4 | 17354376 | 17354625 | CSAR_peak_ | 17.82,20.81,   | :- |
| chr4 | 17354871 | 17354969 | CSAR_peak_ | 32.6,5.86,15.- |    |
| chr4 | 17355082 | 17355176 | CSAR_peak_ | 19.48,34.31,   | :- |
| chr4 | 17355290 | 17355376 | CSAR_peak_ | 19.98,36.74    | -  |
| chr4 | 17355464 | 17355537 | CSAR_peak_ | 26.06,29.14    | -  |
| chr4 | 17355596 | 17355620 | CSAR_peak_ | 9.77           | -  |
| chr4 | 17355698 | 17355825 | CSAR_peak_ | 13.92,16.25    | -  |
| chr4 | 17355845 | 17355882 | CSAR_peak_ | 12.13          | -  |
| chr4 | 17358817 | 17358900 | CSAR_peak_ | 16.55          | -  |
| chr4 | 17358992 | 17359032 | CSAR_peak_ | 6.21           | -  |
| chr4 | 17359138 | 17359184 | CSAR_peak_ | 8.39           | -  |
| chr4 | 17359333 | 17359396 | CSAR_peak_ | 14.92,23.8     | -  |
| chr4 | 17359490 | 17359546 | CSAR_peak_ | 10.94,6.45,7.- |    |
| chr4 | 17359585 | 17359635 | CSAR_peak_ | 8.39           | -  |
| chr4 | 17359701 | 17359703 | CSAR_peak_ | 6.03           | -  |
| chr4 | 17359799 | 17359851 | CSAR_peak_ | 12.13,13.69,   | :- |
| chr4 | 17360209 | 17360288 | CSAR_peak_ | 6.44,16.34     | -  |
| chr4 | 17360528 | 17360575 | CSAR_peak_ | 7.34           | -  |
| chr4 | 17360583 | 17360637 | CSAR_peak_ | 6.03,9.58      | -  |
| chr4 | 17360696 | 17360775 | CSAR_peak_ | 5.71           | -  |
| chr4 | 17360776 | 17360795 | CSAR_peak_ | 8.44,14.34     | -  |
| chr4 | 17360901 | 17360954 | CSAR_peak_ | 19.36,15.56    | -  |
| chr4 | 17361052 | 17361158 | CSAR_peak_ | 6.21,13.48     | -  |
| chr4 | 17380901 | 17380955 | CSAR_peak_ | 7.27           | -  |
| chr4 | 17433714 | 17433775 | CSAR_peak_ | 7.58           | -  |
| chr4 | 17433990 | 17434057 | CSAR_peak_ | 9.13,6.22      | -  |
| chr4 | 17434069 | 17434161 | CSAR_peak_ | 6.02,12.17,9.- |    |
| chr4 | 17434311 | 17434341 | CSAR_peak_ | 7.27           | -  |
| chr4 | 17434443 | 17434462 | CSAR_peak_ | 21.6,21.07     | -  |
| chr4 | 17434556 | 17434687 | CSAR_peak_ | 36.83,15.04,   | :- |
| chr4 | 17434789 | 17434974 | CSAR_peak_ | 20.05,12.59,   | :- |
| chr4 | 17434983 | 17435267 | CSAR_peak_ | 55.74,40.86,   | :- |
| chr4 | 17435411 | 17435440 | CSAR_peak_ | 8.28           | -  |
| chr4 | 17435518 | 17435587 | CSAR_peak_ | 13.66,6.95,7.- |    |
| chr4 | 17435599 | 17435628 | CSAR_peak_ | 17.82          | -  |
| chr4 | 17435729 | 17435863 | CSAR_peak_ | 16.08,8.9,10.- |    |
| chr4 | 17435870 | 17435934 | CSAR_peak_ | 13.61          | -  |
| chr4 | 17435941 | 17435967 | CSAR_peak_ | 6.78           | -  |
| chr4 | 17436004 | 17436024 | CSAR_peak_ | 8.65           | -  |

|      |          |          |            |               |
|------|----------|----------|------------|---------------|
| chr4 | 17436211 | 17436362 | CSAR_peak_ | 20.13,31.73,- |
| chr4 | 17436416 | 17436516 | CSAR_peak_ | 15.58,30.81 - |
| chr4 | 17436558 | 17436574 | CSAR_peak_ | 9.79,21.24 -  |
| chr4 | 17436652 | 17436730 | CSAR_peak_ | 22.52,31.72 - |
| chr4 | 17436816 | 17436901 | CSAR_peak_ | 10.83,20.43 - |
| chr4 | 17436945 | 17437052 | CSAR_peak_ | 19.68,6.87 -  |
| chr4 | 17465171 | 17465284 | CSAR_peak_ | 7.92 -        |
| chr4 | 17465341 | 17465402 | CSAR_peak_ | 8.14 -        |
| chr4 | 17465404 | 17465458 | CSAR_peak_ | 12.13,9.58 -  |
| chr4 | 17466688 | 17466729 | CSAR_peak_ | 8.65,12.13 -  |
| chr4 | 17544888 | 17544956 | CSAR_peak_ | 19.36 -       |
| chr4 | 17545044 | 17545061 | CSAR_peak_ | 7.92 -        |
| chr4 | 17545085 | 17545135 | CSAR_peak_ | 6.21 -        |
| chr4 | 17548084 | 17548114 | CSAR_peak_ | 9.58 -        |
| chr4 | 17548217 | 17548255 | CSAR_peak_ | 9.58 -        |
| chr4 | 17548299 | 17548343 | CSAR_peak_ | 12.13 -       |
| chr4 | 17557631 | 17557673 | CSAR_peak_ | 7.27 -        |
| chr4 | 17608825 | 17608912 | CSAR_peak_ | 21.94,7.26 -  |
| chr4 | 17609354 | 17609396 | CSAR_peak_ | 9.48,6.85 -   |
| chr4 | 17609468 | 17609572 | CSAR_peak_ | 17.82,13.29,- |
| chr4 | 17609847 | 17609969 | CSAR_peak_ | 9.58,12.27 -  |
| chr4 | 17610115 | 17610154 | CSAR_peak_ | 7.27 -        |
| chr4 | 17610320 | 17610416 | CSAR_peak_ | 10.95,12.13 - |
| chr4 | 17610634 | 17610695 | CSAR_peak_ | 10.83,13.48 - |
| chr4 | 17610800 | 17610841 | CSAR_peak_ | 6.21 -        |
| chr4 | 17611370 | 17611419 | CSAR_peak_ | 9.58 -        |
| chr4 | 17611757 | 17611778 | CSAR_peak_ | 7.27 -        |
| chr4 | 17611831 | 17611852 | CSAR_peak_ | 6.21 -        |
| chr4 | 17611921 | 17612016 | CSAR_peak_ | 14.76,8.65 -  |
| chr4 | 17612507 | 17612558 | CSAR_peak_ | 6.94 -        |
| chr4 | 17613155 | 17613215 | CSAR_peak_ | 17.82,8.39 -  |
| chr4 | 17613373 | 17613440 | CSAR_peak_ | 8.65,12.13 -  |
| chr4 | 17613712 | 17613761 | CSAR_peak_ | 6.1 -         |
| chr4 | 17613915 | 17613982 | CSAR_peak_ | 14.88 -       |
| chr4 | 17614105 | 17614150 | CSAR_peak_ | 7.27 -        |
| chr4 | 17614241 | 17614281 | CSAR_peak_ | 6.21,8.39 -   |
| chr4 | 17614285 | 17614380 | CSAR_peak_ | 18.73,12.5 -  |
| chr4 | 17614410 | 17614448 | CSAR_peak_ | 6.21 -        |
| chr4 | 17614489 | 17614600 | CSAR_peak_ | 13.29,20.13 - |
| chr4 | 17614640 | 17614730 | CSAR_peak_ | 6.22,14.34 -  |
| chr4 | 17614768 | 17614881 | CSAR_peak_ | 20.43,10.95 - |
| chr4 | 17615222 | 17615298 | CSAR_peak_ | 6.45,12.17 -  |

|      |          |          |            |                |   |
|------|----------|----------|------------|----------------|---|
| chr4 | 17615449 | 17615503 | CSAR_peak_ | 6.21           | - |
| chr4 | 17617122 | 17617227 | CSAR_peak_ | 14.85          | - |
| chr4 | 17617305 | 17617382 | CSAR_peak_ | 14.88,27.64    | - |
| chr4 | 17617437 | 17617495 | CSAR_peak_ | 16.33,17.37    | - |
| chr4 | 17618347 | 17618399 | CSAR_peak_ | 12.13          | - |
| chr4 | 17626444 | 17626602 | CSAR_peak_ | 28.38,9.27,3(- | - |
| chr4 | 17626674 | 17626761 | CSAR_peak_ | 21.22,20.18    | - |
| chr4 | 17626842 | 17626978 | CSAR_peak_ | 32.27,29.61    | - |
| chr4 | 17627144 | 17627237 | CSAR_peak_ | 17.82,27.11    | - |
| chr4 | 17627254 | 17627311 | CSAR_peak_ | 7.27           | - |
| chr4 | 17627317 | 17627364 | CSAR_peak_ | 14.88          | - |
| chr4 | 17628048 | 17628102 | CSAR_peak_ | 17.82,16.33    | - |
| chr4 | 17628237 | 17628307 | CSAR_peak_ | 9.77           | - |
| chr4 | 17628432 | 17628489 | CSAR_peak_ | 8.39           | - |
| chr4 | 17628594 | 17628646 | CSAR_peak_ | 7.27           | - |
| chr4 | 17640174 | 17640188 | CSAR_peak_ | 6.21           | - |
| chr4 | 17663539 | 17663581 | CSAR_peak_ | 6.21           | - |
| chr4 | 17670083 | 17670145 | CSAR_peak_ | 7.27           | - |
| chr4 | 17670199 | 17670315 | CSAR_peak_ | 12.13,7.34     | - |
| chr4 | 17670549 | 17670582 | CSAR_peak_ | 9.58           | - |
| chr4 | 17670644 | 17670685 | CSAR_peak_ | 9.77           | - |
| chr4 | 17670734 | 17671089 | CSAR_peak_ | 31.41,34.31    | - |
| chr4 | 17671131 | 17671836 | CSAR_peak_ | 24.21,12.13,(- | - |
| chr4 | 17671841 | 17672299 | CSAR_peak_ | 25.73,44.79,(- | - |
| chr4 | 17683394 | 17683524 | CSAR_peak_ | 14.88,8.39     | - |
| chr4 | 17683596 | 17683752 | CSAR_peak_ | 7.58           | - |
| chr4 | 17683763 | 17683821 | CSAR_peak_ | 7.58           | - |
| chr4 | 17683948 | 17684059 | CSAR_peak_ | 9.58           | - |
| chr4 | 17684155 | 17684323 | CSAR_peak_ | 20.35,20.43    | - |
| chr4 | 17684435 | 17684473 | CSAR_peak_ | 8.39           | - |
| chr4 | 17684558 | 17684637 | CSAR_peak_ | 12.13,9.58     | - |
| chr4 | 17685429 | 17685498 | CSAR_peak_ | 9.58           | - |
| chr4 | 17685594 | 17685688 | CSAR_peak_ | 23.03          | - |
| chr4 | 17685963 | 17686077 | CSAR_peak_ | 13.48,14.88    | - |
| chr4 | 17686251 | 17686361 | CSAR_peak_ | 23.03,12.13,(- | - |
| chr4 | 17775932 | 17775996 | CSAR_peak_ | 34.89,21.35    | - |
| chr4 | 17776027 | 17776071 | CSAR_peak_ | 9.58           | - |
| chr4 | 17776845 | 17776905 | CSAR_peak_ | 7.27           | - |
| chr4 | 17777061 | 17777090 | CSAR_peak_ | 7.27           | - |
| chr4 | 17777180 | 17777202 | CSAR_peak_ | 7.58           | - |
| chr4 | 17787683 | 17787716 | CSAR_peak_ | 7.27           | - |
| chr4 | 17800847 | 17800900 | CSAR_peak_ | 7.27           | - |

|      |          |          |            |               |   |
|------|----------|----------|------------|---------------|---|
| chr4 | 17803054 | 17803140 | CSAR_peak_ | 11.63,6.44    | - |
| chr4 | 17803197 | 17803265 | CSAR_peak_ | 18.95,10.02   | - |
| chr4 | 17803273 | 17803371 | CSAR_peak_ | 23.95,7.58    | - |
| chr4 | 17803471 | 17803534 | CSAR_peak_ | 27.77         | - |
| chr4 | 17803882 | 17803903 | CSAR_peak_ | 17.82         | - |
| chr4 | 17803983 | 17804046 | CSAR_peak_ | 24.21,10.62   | - |
| chr4 | 17804096 | 17804375 | CSAR_peak_ | 16.77,15.56,( | - |
| chr4 | 17804437 | 17804543 | CSAR_peak_ | 14.76,17.82,( | - |
| chr4 | 17804590 | 17804668 | CSAR_peak_ | 17.4,7.73     | - |
| chr4 | 17804730 | 17804835 | CSAR_peak_ | 6.1,11.66     | - |
| chr4 | 17804872 | 17804973 | CSAR_peak_ | 23,21.37      | - |
| chr4 | 17805064 | 17805149 | CSAR_peak_ | 19.96,10.18   | - |
| chr4 | 17805238 | 17805426 | CSAR_peak_ | 11.74,6.64,1( | - |
| chr4 | 17805650 | 17805686 | CSAR_peak_ | 9.13,12.94    | - |
| chr4 | 17806284 | 17806340 | CSAR_peak_ | 18.73,8.28    | - |
| chr4 | 17806430 | 17806435 | CSAR_peak_ | 7.27          | - |
| chr4 | 17824400 | 17824426 | CSAR_peak_ | 7.27          | - |
| chr4 | 17825924 | 17825963 | CSAR_peak_ | 6.21          | - |
| chr4 | 17831816 | 17831850 | CSAR_peak_ | 7.27          | - |
| chr4 | 17831950 | 17831994 | CSAR_peak_ | 7.27,7.58     | - |
| chr4 | 17832509 | 17832585 | CSAR_peak_ | 14.88,12.17   | - |
| chr4 | 17832790 | 17832846 | CSAR_peak_ | 10.83         | - |
| chr4 | 17833160 | 17833204 | CSAR_peak_ | 12.13         | - |
| chr4 | 17833462 | 17833518 | CSAR_peak_ | 11.96         | - |
| chr4 | 17834071 | 17834129 | CSAR_peak_ | 16.05         | - |
| chr4 | 17834241 | 17834328 | CSAR_peak_ | 9.58,6.03     | - |
| chr4 | 17834499 | 17834546 | CSAR_peak_ | 8.28          | - |
| chr4 | 17884185 | 17884229 | CSAR_peak_ | 5.86,12.13    | - |
| chr4 | 17884317 | 17884337 | CSAR_peak_ | 9.58          | - |
| chr4 | 17884542 | 17884608 | CSAR_peak_ | 7.27          | - |
| chr4 | 17888781 | 17888830 | CSAR_peak_ | 6.21          | - |
| chr4 | 17889494 | 17889504 | CSAR_peak_ | 7.58,7.27     | - |
| chr4 | 17889583 | 17889626 | CSAR_peak_ | 8.39,9.58     | - |
| chr4 | 17890731 | 17890770 | CSAR_peak_ | 12.13         | - |
| chr4 | 17891451 | 17891534 | CSAR_peak_ | 14.88         | - |
| chr4 | 17892268 | 17892322 | CSAR_peak_ | 9.77          | - |
| chr4 | 17895065 | 17895133 | CSAR_peak_ | 9.58,19.36    | - |
| chr4 | 17895544 | 17895573 | CSAR_peak_ | 6.21          | - |
| chr4 | 17897187 | 17897230 | CSAR_peak_ | 16.33         | - |
| chr4 | 17897318 | 17897329 | CSAR_peak_ | 7.27          | - |
| chr4 | 17897377 | 17897389 | CSAR_peak_ | 6.21          | - |
| chr4 | 17897644 | 17897682 | CSAR_peak_ | 10.83         | - |

|      |          |          |            |               |   |
|------|----------|----------|------------|---------------|---|
| chr4 | 17929191 | 17929253 | CSAR_peak_ | 12.13,9.58    | - |
| chr4 | 17929502 | 17929564 | CSAR_peak_ | 12.13         | - |
| chr4 | 17929608 | 17929684 | CSAR_peak_ | 7.27,6.03,6.2 | - |
| chr4 | 17930543 | 17930602 | CSAR_peak_ | 9.61          | - |
| chr4 | 17931221 | 17931307 | CSAR_peak_ | 14.88,6.21    | - |
| chr4 | 17931752 | 17931811 | CSAR_peak_ | 13.48         | - |
| chr4 | 17931869 | 17931927 | CSAR_peak_ | 24.21         | - |
| chr4 | 17932080 | 17932123 | CSAR_peak_ | 6.81          | - |
| chr4 | 17932207 | 17932300 | CSAR_peak_ | 12.13,6.03,8. | - |
| chr4 | 17932477 | 17932532 | CSAR_peak_ | 17.37,10.52,( | - |
| chr4 | 17932591 | 17932654 | CSAR_peak_ | 6.03          | - |
| chr4 | 17932884 | 17932978 | CSAR_peak_ | 12.13,13.48   | - |
| chr4 | 17933093 | 17933134 | CSAR_peak_ | 8.39          | - |
| chr4 | 17933628 | 17933661 | CSAR_peak_ | 8.39          | - |
| chr4 | 17933681 | 17933705 | CSAR_peak_ | 6.87          | - |
| chr4 | 17933771 | 17933844 | CSAR_peak_ | 14.76,6.95    | - |
| chr4 | 17933940 | 17933980 | CSAR_peak_ | 8.39          | - |
| chr4 | 17934228 | 17934272 | CSAR_peak_ | 12.13         | - |
| chr4 | 17934365 | 17934400 | CSAR_peak_ | 6.44,12.13    | - |
| chr4 | 17934513 | 17934545 | CSAR_peak_ | 9.8           | - |
| chr4 | 17934685 | 17934770 | CSAR_peak_ | 9.58,7.31     | - |
| chr4 | 17956225 | 17956289 | CSAR_peak_ | 11.14         | - |
| chr4 | 17956349 | 17956450 | CSAR_peak_ | 5.86,9.58,6.2 | - |
| chr4 | 17957769 | 17957886 | CSAR_peak_ | 31.2,9.58     | - |
| chr4 | 17958341 | 17958380 | CSAR_peak_ | 10.83         | - |
| chr4 | 17958500 | 17958594 | CSAR_peak_ | 13,9.58       | - |
| chr4 | 17958654 | 17958684 | CSAR_peak_ | 7.27,6.57     | - |
| chr4 | 17958713 | 17958780 | CSAR_peak_ | 12.31         | - |
| chr4 | 17959671 | 17959720 | CSAR_peak_ | 6.03          | - |
| chr4 | 17959906 | 17959946 | CSAR_peak_ | 7.27          | - |
| chr4 | 17960206 | 17960241 | CSAR_peak_ | 9.48          | - |
| chr4 | 17960246 | 17960279 | CSAR_peak_ | 9.58          | - |
| chr4 | 17960287 | 17960345 | CSAR_peak_ | 8.52,8.95     | - |
| chr4 | 17960411 | 17960473 | CSAR_peak_ | 9.58          | - |
| chr4 | 17961019 | 17961131 | CSAR_peak_ | 26.37,42.59   | - |
| chr4 | 17961639 | 17961723 | CSAR_peak_ | 7.27,29.4     | - |
| chr4 | 17961861 | 17961899 | CSAR_peak_ | 14.88         | - |
| chr4 | 17961967 | 17962014 | CSAR_peak_ | 12.17         | - |
| chr4 | 17962385 | 17962406 | CSAR_peak_ | 6.21          | - |
| chr4 | 17962497 | 17962597 | CSAR_peak_ | 6.21,13.48    | - |
| chr4 | 17963402 | 17963485 | CSAR_peak_ | 7.27,10.83,9. | - |
| chr4 | 17963505 | 17963510 | CSAR_peak_ | 7.27          | - |

|      |          |          |            |                   |   |
|------|----------|----------|------------|-------------------|---|
| chr4 | 17963582 | 17963627 | CSAR_peak_ | 17.37             | - |
| chr4 | 17963876 | 17963899 | CSAR_peak_ | 10.02             | - |
| chr4 | 17964074 | 17964134 | CSAR_peak_ | 5.9               | - |
| chr4 | 17964137 | 17964176 | CSAR_peak_ | 8.39              | - |
| chr4 | 17964665 | 17964695 | CSAR_peak_ | 7.27              | - |
| chr4 | 17965099 | 17965159 | CSAR_peak_ | 10.83,9.58        | - |
| chr4 | 17965715 | 17965791 | CSAR_peak_ | 24.21             | - |
| chr4 | 17965811 | 17965860 | CSAR_peak_ | 7.27,12.13        | - |
| chr4 | 17966371 | 17966438 | CSAR_peak_ | 9.58              | - |
| chr4 | 17978592 | 17978642 | CSAR_peak_ | 8.39              | - |
| chr4 | 17978998 | 17979054 | CSAR_peak_ | 13.48,10.83       | - |
| chr4 | 17979145 | 17979193 | CSAR_peak_ | 17.82,12.13       | - |
| chr4 | 18011423 | 18011467 | CSAR_peak_ | 14.88             | - |
| chr4 | 18011480 | 18011507 | CSAR_peak_ | 12.17             | - |
| chr4 | 18011624 | 18011678 | CSAR_peak_ | 9.58,6.03         | - |
| chr4 | 18011868 | 18011893 | CSAR_peak_ | 6.21              | - |
| chr4 | 18012056 | 18012103 | CSAR_peak_ | 7.58              | - |
| chr4 | 18012165 | 18012209 | CSAR_peak_ | 7.27,9.58         | - |
| chr4 | 18012473 | 18012677 | CSAR_peak_ | 33.38,40.88       | - |
| chr4 | 18012848 | 18012943 | CSAR_peak_ | 6.02,13.44        | - |
| chr4 | 18013044 | 18013106 | CSAR_peak_ | 22.56             | - |
| chr4 | 18013114 | 18013125 | CSAR_peak_ | 7.27              | - |
| chr4 | 18013214 | 18013229 | CSAR_peak_ | 18.73             | - |
| chr4 | 18013261 | 18013309 | CSAR_peak_ | 7.27              | - |
| chr4 | 18013312 | 18013365 | CSAR_peak_ | 16.33,9.58        | - |
| chr4 | 18013820 | 18013886 | CSAR_peak_ | 9.58              | - |
| chr4 | 18013978 | 18014018 | CSAR_peak_ | 7.27              | - |
| chr4 | 18014385 | 18014467 | CSAR_peak_ | 8.65,6.1          | - |
| chr4 | 18014581 | 18014613 | CSAR_peak_ | 9.35,11.45        | - |
| chr4 | 18014735 | 18014797 | CSAR_peak_ | 10.44,12.17       | - |
| chr4 | 18014892 | 18014958 | CSAR_peak_ | 11.14             | - |
| chr4 | 18016194 | 18016288 | CSAR_peak_ | 7.92,9.97         | - |
| chr4 | 18016361 | 18016440 | CSAR_peak_ | 22.56,8.95,11.14  | - |
| chr4 | 18016551 | 18016598 | CSAR_peak_ | 7.27              | - |
| chr4 | 18016688 | 18016803 | CSAR_peak_ | 16.33,20.94,11.14 | - |
| chr4 | 18016830 | 18016892 | CSAR_peak_ | 6.03              | - |
| chr4 | 18018028 | 18018080 | CSAR_peak_ | 10.83             | - |
| chr4 | 18041511 | 18041569 | CSAR_peak_ | 7.27              | - |
| chr4 | 18041679 | 18041737 | CSAR_peak_ | 8.39              | - |
| chr4 | 18042095 | 18042140 | CSAR_peak_ | 20.43,6.1         | - |
| chr4 | 18042251 | 18042302 | CSAR_peak_ | 8.28,12.17        | - |
| chr4 | 18042412 | 18042461 | CSAR_peak_ | 6.81,7.58         | - |



|      |          |          |            |                |   |
|------|----------|----------|------------|----------------|---|
| chr4 | 18042703 | 18042768 | CSAR_peak_ | 17.37,7.27     | - |
| chr4 | 18042859 | 18042889 | CSAR_peak_ | 7.27           | - |
| chr4 | 18043026 | 18043098 | CSAR_peak_ | 13.85,18.95    | - |
| chr4 | 18043200 | 18043210 | CSAR_peak_ | 6.21           | - |
| chr4 | 18043342 | 18043490 | CSAR_peak_ | 19.36,11.14    | - |
| chr4 | 18043534 | 18043615 | CSAR_peak_ | 16.33          | - |
| chr4 | 18043666 | 18043733 | CSAR_peak_ | 13.48          | - |
| chr4 | 18044451 | 18044493 | CSAR_peak_ | 9.77           | - |
| chr4 | 18044628 | 18044712 | CSAR_peak_ | 8.65           | - |
| chr4 | 18044724 | 18044742 | CSAR_peak_ | 8.39           | - |
| chr4 | 18045051 | 18045153 | CSAR_peak_ | 28.94,8.39,1(- | - |
| chr4 | 18045272 | 18045331 | CSAR_peak_ | 13.48,14.88    | - |
| chr4 | 18045357 | 18045416 | CSAR_peak_ | 9.58,6.57      | - |
| chr4 | 18045418 | 18045491 | CSAR_peak_ | 7.27           | - |
| chr4 | 18045588 | 18045678 | CSAR_peak_ | 8.52           | - |
| chr4 | 18046159 | 18046202 | CSAR_peak_ | 7.27           | - |
| chr4 | 18047479 | 18047513 | CSAR_peak_ | 7.27           | - |
| chr4 | 18047526 | 18047605 | CSAR_peak_ | 14.88,7.27     | - |
| chr4 | 18047793 | 18047898 | CSAR_peak_ | 16.34,17.82    | - |
| chr4 | 18048259 | 18048281 | CSAR_peak_ | 17.82          | - |
| chr4 | 18048393 | 18048440 | CSAR_peak_ | 6.57,24.21     | - |
| chr4 | 18048852 | 18048989 | CSAR_peak_ | 12.35,6.22     | - |
| chr4 | 18049001 | 18049026 | CSAR_peak_ | 7.26           | - |
| chr4 | 18057847 | 18057893 | CSAR_peak_ | 13,7.58        | - |
| chr4 | 18058028 | 18058118 | CSAR_peak_ | 8.39,16.33     | - |
| chr4 | 18058204 | 18058247 | CSAR_peak_ | 6.21           | - |
| chr4 | 18058667 | 18058732 | CSAR_peak_ | 6.57,14.88     | - |
| chr4 | 18058811 | 18058926 | CSAR_peak_ | 7.27,6.21      | - |
| chr4 | 18059332 | 18059367 | CSAR_peak_ | 9.58           | - |
| chr4 | 18069888 | 18069955 | CSAR_peak_ | 16.08,9.27     | - |
| chr4 | 18070405 | 18070449 | CSAR_peak_ | 7.27           | - |
| chr4 | 18070739 | 18070795 | CSAR_peak_ | 7.27           | - |
| chr4 | 18071527 | 18071652 | CSAR_peak_ | 7.27,7.27      | - |
| chr4 | 18072242 | 18072297 | CSAR_peak_ | 9.58,8.65      | - |
| chr4 | 18072317 | 18072434 | CSAR_peak_ | 20.07,9.58     | - |
| chr4 | 18072470 | 18072585 | CSAR_peak_ | 15.21          | - |
| chr4 | 18072655 | 18072700 | CSAR_peak_ | 7.27           | - |
| chr4 | 18078172 | 18078366 | CSAR_peak_ | 8.2,7.27,11.0- | - |
| chr4 | 18078855 | 18078947 | CSAR_peak_ | 7.92,12.72,1(- | - |
| chr4 | 18078964 | 18079030 | CSAR_peak_ | 17.82          | - |
| chr4 | 18079202 | 18079258 | CSAR_peak_ | 8.13           | - |
| chr4 | 18079512 | 18079555 | CSAR_peak_ | 6.21           | - |

|      |          |          |            |               |   |
|------|----------|----------|------------|---------------|---|
| chr4 | 18083627 | 18083690 | CSAR_peak_ | 14.76         | - |
| chr4 | 18083702 | 18083720 | CSAR_peak_ | 9.48          | - |
| chr4 | 18083812 | 18083915 | CSAR_peak_ | 6.1,10.07     | - |
| chr4 | 18084025 | 18084176 | CSAR_peak_ | 9.58,20.43,7. | - |
| chr4 | 18084419 | 18084476 | CSAR_peak_ | 7.27          | - |
| chr4 | 18085011 | 18085116 | CSAR_peak_ | 14.88,9.58    | - |
| chr4 | 18085255 | 18085314 | CSAR_peak_ | 12.13,10.83   | - |
| chr4 | 18087649 | 18087710 | CSAR_peak_ | 10.02         | - |
| chr4 | 18087748 | 18087813 | CSAR_peak_ | 9.58,7.27     | - |
| chr4 | 18089069 | 18089074 | CSAR_peak_ | 10.83         | - |
| chr4 | 18089184 | 18089259 | CSAR_peak_ | 18.65,9.58    | - |
| chr4 | 18089271 | 18089338 | CSAR_peak_ | 7.27,13.48    | - |
| chr4 | 18089576 | 18089609 | CSAR_peak_ | 6.21          | - |
| chr4 | 18090712 | 18090770 | CSAR_peak_ | 19.36         | - |
| chr4 | 18090980 | 18091056 | CSAR_peak_ | 9.41,14.88    | - |
| chr4 | 18092296 | 18092377 | CSAR_peak_ | 9.58          | - |
| chr4 | 18092492 | 18092558 | CSAR_peak_ | 12.13,7.27    | - |
| chr4 | 18092860 | 18092930 | CSAR_peak_ | 19.36,14.76   | - |
| chr4 | 18093144 | 18093195 | CSAR_peak_ | 6.57,6.21     | - |
| chr4 | 18093274 | 18093328 | CSAR_peak_ | 8.39          | - |
| chr4 | 18094008 | 18094068 | CSAR_peak_ | 17.82,25.91   | - |
| chr4 | 18095429 | 18095508 | CSAR_peak_ | 8.39          | - |
| chr4 | 18096884 | 18096923 | CSAR_peak_ | 10.83         | - |
| chr4 | 18097314 | 18097467 | CSAR_peak_ | 6.21,8.39     | - |
| chr4 | 18098117 | 18098207 | CSAR_peak_ | 8.09,10.83    | - |
| chr4 | 18098301 | 18098367 | CSAR_peak_ | 6.21          | - |
| chr4 | 18115819 | 18115841 | CSAR_peak_ | 6.03          | - |
| chr4 | 18116044 | 18116201 | CSAR_peak_ | 14.88,17.82   | - |
| chr4 | 18116256 | 18116350 | CSAR_peak_ | 8.39          | - |
| chr4 | 18116361 | 18116425 | CSAR_peak_ | 11.38         | - |
| chr4 | 18116438 | 18116532 | CSAR_peak_ | 14.88,7.27    | - |
| chr4 | 18116792 | 18116888 | CSAR_peak_ | 12.13         | - |
| chr4 | 18116984 | 18117084 | CSAR_peak_ | 10.83,6.94    | - |
| chr4 | 18118630 | 18118867 | CSAR_peak_ | 17.82         | - |
| chr4 | 18136394 | 18136493 | CSAR_peak_ | 9.58          | - |
| chr4 | 18136705 | 18136792 | CSAR_peak_ | 9.58          | - |
| chr4 | 18137114 | 18137168 | CSAR_peak_ | 10.83         | - |
| chr4 | 18137465 | 18137528 | CSAR_peak_ | 8.39          | - |
| chr4 | 18137786 | 18137879 | CSAR_peak_ | 8.39          | - |
| chr4 | 18140146 | 18140210 | CSAR_peak_ | 8.39          | - |
| chr4 | 18140687 | 18140781 | CSAR_peak_ | 5.86          | - |
| chr4 | 18147143 | 18147181 | CSAR_peak_ | 9.58          | - |

|      |          |          |            |                   |   |
|------|----------|----------|------------|-------------------|---|
| chr4 | 18147474 | 18147530 | CSAR_peak_ | 10.83             | - |
| chr4 | 18148214 | 18148341 | CSAR_peak_ | 23.03             | - |
| chr4 | 18148347 | 18148438 | CSAR_peak_ | 16.34             | - |
| chr4 | 18148656 | 18148780 | CSAR_peak_ | 30.81,16.11       | - |
| chr4 | 18149023 | 18149093 | CSAR_peak_ | 7.27              | - |
| chr4 | 18149362 | 18149501 | CSAR_peak_ | 17.82,16.77       | - |
| chr4 | 18149518 | 18149581 | CSAR_peak_ | 9.77,9.32         | - |
| chr4 | 18163833 | 18163902 | CSAR_peak_ | 34.84,10.17       | - |
| chr4 | 18163935 | 18163993 | CSAR_peak_ | 15                | - |
| chr4 | 18164182 | 18164253 | CSAR_peak_ | 8.65              | - |
| chr4 | 18164365 | 18164478 | CSAR_peak_ | 20.18,15.2        | - |
| chr4 | 18164558 | 18164565 | CSAR_peak_ | 6.95              | - |
| chr4 | 18164612 | 18164649 | CSAR_peak_ | 10.83             | - |
| chr4 | 18164749 | 18164859 | CSAR_peak_ | 9.58              | - |
| chr4 | 18164951 | 18165000 | CSAR_peak_ | 7.58              | - |
| chr4 | 18165035 | 18165221 | CSAR_peak_ | 7.58,13.09,10.83  | - |
| chr4 | 18189530 | 18189610 | CSAR_peak_ | 7.27              | - |
| chr4 | 18215405 | 18215441 | CSAR_peak_ | 7.27              | - |
| chr4 | 18215761 | 18215836 | CSAR_peak_ | 14.76             | - |
| chr4 | 18215897 | 18216100 | CSAR_peak_ | 10.66,16.23,10.83 | - |
| chr4 | 18216105 | 18216540 | CSAR_peak_ | 29.52,12.35,10.83 | - |
| chr4 | 18216553 | 18216932 | CSAR_peak_ | 14.34,28.4,10.83  | - |
| chr4 | 18216967 | 18217021 | CSAR_peak_ | 8.65              | - |
| chr4 | 18217025 | 18217122 | CSAR_peak_ | 34.47,11.81       | - |
| chr4 | 18217173 | 18217340 | CSAR_peak_ | 20.94,12.94       | - |
| chr4 | 18217657 | 18217703 | CSAR_peak_ | 10.83             | - |
| chr4 | 18218311 | 18218364 | CSAR_peak_ | 14.88,6.21        | - |
| chr4 | 18218724 | 18218734 | CSAR_peak_ | 7.27              | - |
| chr4 | 18219336 | 18219405 | CSAR_peak_ | 7.58,9.48,10.83   | - |
| chr4 | 18219634 | 18219675 | CSAR_peak_ | 9.58,8.39         | - |
| chr4 | 18219723 | 18219783 | CSAR_peak_ | 12.13,10.83       | - |
| chr4 | 18219821 | 18219859 | CSAR_peak_ | 7.27              | - |
| chr4 | 18219885 | 18219941 | CSAR_peak_ | 12.17             | - |
| chr4 | 18220056 | 18220102 | CSAR_peak_ | 14.88             | - |
| chr4 | 18224310 | 18224363 | CSAR_peak_ | 7.27              | - |
| chr4 | 18227040 | 18227070 | CSAR_peak_ | 7.27              | - |
| chr4 | 18229784 | 18229926 | CSAR_peak_ | 12.17,17.82       | - |
| chr4 | 18231239 | 18231290 | CSAR_peak_ | 7.92              | - |
| chr4 | 18234331 | 18234420 | CSAR_peak_ | 7.58              | - |
| chr4 | 18234610 | 18234716 | CSAR_peak_ | 21.94,13.66       | - |
| chr4 | 18234816 | 18234861 | CSAR_peak_ | 6.21              | - |
| chr4 | 18235136 | 18235227 | CSAR_peak_ | 12.13             | - |

|      |          |          |            |               |   |
|------|----------|----------|------------|---------------|---|
| chr4 | 18248530 | 18248578 | CSAR_peak_ | 9.77          | - |
| chr4 | 18274193 | 18274633 | CSAR_peak_ | 14.39,12.69,  | - |
| chr4 | 18274748 | 18274783 | CSAR_peak_ | 7.27          | - |
| chr4 | 18274815 | 18274968 | CSAR_peak_ | 34.08,33.12   | - |
| chr4 | 18281792 | 18281838 | CSAR_peak_ | 12.13         | - |
| chr4 | 18371486 | 18371527 | CSAR_peak_ | 11.96,6.03    | - |
| chr4 | 18372305 | 18372353 | CSAR_peak_ | 9.77          | - |
| chr4 | 18414977 | 18415029 | CSAR_peak_ | 9.58          | - |
| chr4 | 18416350 | 18416441 | CSAR_peak_ | 12.13,12.13   | - |
| chr4 | 18416598 | 18416668 | CSAR_peak_ | 7.27,7.27     | - |
| chr4 | 18449504 | 18449543 | CSAR_peak_ | 10.83         | - |
| chr4 | 18451064 | 18451129 | CSAR_peak_ | 19.36,12.13   | - |
| chr4 | 18469660 | 18469751 | CSAR_peak_ | 6.21,7.27     | - |
| chr4 | 18470990 | 18471046 | CSAR_peak_ | 9.58          | - |
| chr4 | 18471175 | 18471243 | CSAR_peak_ | 7.58          | - |
| chr4 | 18509109 | 18509204 | CSAR_peak_ | 17.82         | - |
| chr4 | 18512538 | 18512621 | CSAR_peak_ | 9.58,7.27     | - |
| chr4 | 18512758 | 18512913 | CSAR_peak_ | 19.36,20.43,  | - |
| chr4 | 18513006 | 18513066 | CSAR_peak_ | 17.82         | - |
| chr4 | 18513499 | 18513588 | CSAR_peak_ | 6.81,7.27,10. | - |
| chr4 | 18514024 | 18514092 | CSAR_peak_ | 18.73,18.95   | - |
| chr4 | 18518374 | 18518434 | CSAR_peak_ | 12.31,9.61    | - |
| chr4 | 18537122 | 18537180 | CSAR_peak_ | 8.39,12.13    | - |
| chr4 | 18555670 | 18555764 | CSAR_peak_ | 7.27          | - |
| chr4 | 18555853 | 18555890 | CSAR_peak_ | 9.58          | - |
| chr4 | 18556082 | 18556102 | CSAR_peak_ | 10.02         | - |
| chr4 | 18556187 | 18556264 | CSAR_peak_ | 11.66,16.11   | - |
| chr4 | 18556370 | 18556433 | CSAR_peak_ | 11.07,8.9     | - |
| chr4 | 18556873 | 18556917 | CSAR_peak_ | 13.29,18.73   | - |
| chr4 | 18557017 | 18557095 | CSAR_peak_ | 18.65,5.86,2! | - |
| chr4 | 18557432 | 18557710 | CSAR_peak_ | 38.23,17.68   | - |
| chr4 | 18557783 | 18557919 | CSAR_peak_ | 15.21,25.08,! | - |
| chr4 | 18558001 | 18558146 | CSAR_peak_ | 14.25,6.81,1! | - |
| chr4 | 18558165 | 18558326 | CSAR_peak_ | 11.35,7,13.6! | - |
| chr4 | 18562197 | 18562267 | CSAR_peak_ | 9.58          | - |
| chr4 | 18562306 | 18562362 | CSAR_peak_ | 12.17,7.27    | - |
| chr4 | 18562452 | 18562519 | CSAR_peak_ | 6.21,8.39     | - |
| chr4 | 18562808 | 18562862 | CSAR_peak_ | 8.39          | - |
| chr4 | 18572565 | 18572601 | CSAR_peak_ | 6.57          | - |
| chr5 | 60658    | 60779    | CSAR_peak_ | 19.73,44.69,! | + |
| chr5 | 117526   | 117595   | CSAR_peak_ | 10.83,12.13   | + |
| chr5 | 118335   | 118381   | CSAR_peak_ | 5.62          | + |

|      |        |        |             |               |   |
|------|--------|--------|-------------|---------------|---|
| chr5 | 187270 | 187342 | CSAR_peak_! | 6.21          | + |
| chr5 | 190091 | 190122 | CSAR_peak_! | 6.21          | + |
| chr5 | 201940 | 201971 | CSAR_peak_! | 6.57          | + |
| chr5 | 207713 | 207770 | CSAR_peak_! | 12.13,7.34,6. | + |
| chr5 | 207971 | 208031 | CSAR_peak_! | 6.95          | + |
| chr5 | 208222 | 208288 | CSAR_peak_! | 9.61          | + |
| chr5 | 208848 | 208903 | CSAR_peak_! | 8.39          | + |
| chr5 | 209216 | 209252 | CSAR_peak_! | 6.21          | + |
| chr5 | 210004 | 210102 | CSAR_peak_! | 10.83         | + |
| chr5 | 210264 | 210350 | CSAR_peak_! | 8.39,13.48    | + |
| chr5 | 221306 | 221372 | CSAR_peak_! | 6.21          | + |
| chr5 | 221875 | 221930 | CSAR_peak_! | 7.27          | + |
| chr5 | 251922 | 251979 | CSAR_peak_! | 8.65          | + |
| chr5 | 290123 | 290161 | CSAR_peak_! | 8.3           | + |
| chr5 | 290162 | 290242 | CSAR_peak_! | 7.98,11.77    | + |
| chr5 | 290262 | 290573 | CSAR_peak_! | 20.22,11.38,  | + |
| chr5 | 290628 | 290682 | CSAR_peak_! | 14.96,21.27   | + |
| chr5 | 290746 | 290799 | CSAR_peak_! | 10.35         | + |
| chr5 | 290810 | 291004 | CSAR_peak_! | 16.33,26.43,  | + |
| chr5 | 291007 | 291118 | CSAR_peak_! | 8.52,12.6     | + |
| chr5 | 291160 | 291199 | CSAR_peak_! | 7.27          | + |
| chr5 | 291205 | 291253 | CSAR_peak_! | 14.88         | + |
| chr5 | 291416 | 291610 | CSAR_peak_! | 11.66,12.04,  | + |
| chr5 | 291694 | 291777 | CSAR_peak_! | 10.57,8.34    | + |
| chr5 | 291779 | 291914 | CSAR_peak_! | 8.39,13.48,1: | + |
| chr5 | 291996 | 292014 | CSAR_peak_! | 7.27          | + |
| chr5 | 292018 | 292067 | CSAR_peak_! | 8.09          | + |
| chr5 | 292353 | 292476 | CSAR_peak_! | 8.39,11.74    | + |
| chr5 | 292685 | 292746 | CSAR_peak_! | 7.06,11.14    | + |
| chr5 | 292810 | 292957 | CSAR_peak_! | 11.14,6.95,1: | + |
| chr5 | 293013 | 293096 | CSAR_peak_! | 9.58          | + |
| chr5 | 293164 | 293203 | CSAR_peak_! | 12.6          | + |
| chr5 | 293516 | 293559 | CSAR_peak_! | 6.21          | + |
| chr5 | 293578 | 293696 | CSAR_peak_! | 6.03,13.48    | + |
| chr5 | 293960 | 294039 | CSAR_peak_! | 12.31         | + |
| chr5 | 294919 | 294992 | CSAR_peak_! | 14.88,8.39    | + |
| chr5 | 295348 | 295428 | CSAR_peak_! | 17.82,13.44   | + |
| chr5 | 296644 | 296716 | CSAR_peak_! | 9.58,6.57     | + |
| chr5 | 296904 | 296952 | CSAR_peak_! | 14.88         | + |
| chr5 | 371928 | 371978 | CSAR_peak_! | 21.56,5.62    | + |
| chr5 | 372000 | 372060 | CSAR_peak_! | 6.57,7.92,7.2 | + |
| chr5 | 372074 | 372111 | CSAR_peak_! | 7.27          | + |

|      |        |        |             |               |   |
|------|--------|--------|-------------|---------------|---|
| chr5 | 372347 | 372394 | CSAR_peak_! | 7.27          | + |
| chr5 | 372614 | 372676 | CSAR_peak_! | 6.57          | + |
| chr5 | 372876 | 372918 | CSAR_peak_! | 7.27          | + |
| chr5 | 379051 | 379162 | CSAR_peak_! | 7.58,12.13    | + |
| chr5 | 402391 | 402470 | CSAR_peak_! | 10.83         | + |
| chr5 | 426374 | 426445 | CSAR_peak_! | 12.5          | + |
| chr5 | 426562 | 426640 | CSAR_peak_! | 6.21,8.95,12. | + |
| chr5 | 426785 | 426882 | CSAR_peak_! | 9.58,13.44,1. | + |
| chr5 | 426941 | 427022 | CSAR_peak_! | 6.21          | + |
| chr5 | 427809 | 428017 | CSAR_peak_! | 16.34,11.72,. | + |
| chr5 | 428088 | 428135 | CSAR_peak_! | 9.58          | + |
| chr5 | 428699 | 428805 | CSAR_peak_! | 16.11,6.2,10. | + |
| chr5 | 429292 | 429380 | CSAR_peak_! | 8.39,10.83    | + |
| chr5 | 429925 | 429973 | CSAR_peak_! | 8.65,6.85,6.0 | + |
| chr5 | 430676 | 430820 | CSAR_peak_! | 17.52         | + |
| chr5 | 431881 | 431937 | CSAR_peak_! | 8.39          | + |
| chr5 | 432389 | 432438 | CSAR_peak_! | 6.37          | + |
| chr5 | 432781 | 432836 | CSAR_peak_! | 6.21          | + |
| chr5 | 432980 | 433058 | CSAR_peak_! | 8.39          | + |
| chr5 | 433132 | 433201 | CSAR_peak_! | 6.44          | + |
| chr5 | 437889 | 437922 | CSAR_peak_! | 6.21          | + |
| chr5 | 474617 | 474673 | CSAR_peak_! | 7.27          | + |
| chr5 | 475815 | 475861 | CSAR_peak_! | 6.57          | + |
| chr5 | 476036 | 476092 | CSAR_peak_! | 8.39          | + |
| chr5 | 482170 | 482219 | CSAR_peak_! | 5.62          | + |
| chr5 | 533468 | 533552 | CSAR_peak_! | 8.39          | + |
| chr5 | 606248 | 606299 | CSAR_peak_! | 6.02,8.92     | + |
| chr5 | 606480 | 606520 | CSAR_peak_! | 6.21          | + |
| chr5 | 606607 | 606723 | CSAR_peak_! | 12.13         | + |
| chr5 | 648952 | 648985 | CSAR_peak_! | 8.65          | + |
| chr5 | 651629 | 651691 | CSAR_peak_! | 9.58          | + |
| chr5 | 658892 | 658932 | CSAR_peak_! | 5.62          | + |
| chr5 | 659603 | 659653 | CSAR_peak_! | 8.39          | + |
| chr5 | 663250 | 663291 | CSAR_peak_! | 13.44         | + |
| chr5 | 663378 | 663388 | CSAR_peak_! | 9.58          | + |
| chr5 | 664700 | 664746 | CSAR_peak_! | 6.21          | + |
| chr5 | 667594 | 667636 | CSAR_peak_! | 8.39          | + |
| chr5 | 667679 | 667755 | CSAR_peak_! | 7.34,10.02    | + |
| chr5 | 667892 | 667940 | CSAR_peak_! | 6.21          | + |
| chr5 | 788131 | 788168 | CSAR_peak_! | 10.83         | + |
| chr5 | 788350 | 788427 | CSAR_peak_! | 9.58          | + |
| chr5 | 788578 | 788620 | CSAR_peak_! | 6.21          | + |

|      |         |         |             |                  |   |
|------|---------|---------|-------------|------------------|---|
| chr5 | 788789  | 788838  | CSAR_peak_! | 17.82            | + |
| chr5 | 790564  | 790652  | CSAR_peak_! | 10.83            | + |
| chr5 | 791334  | 791414  | CSAR_peak_! | 6.45,13.48       | + |
| chr5 | 792164  | 792210  | CSAR_peak_! | 8.65             | + |
| chr5 | 794648  | 794701  | CSAR_peak_! | 7.27,6.03        | + |
| chr5 | 795886  | 795918  | CSAR_peak_! | 8.39             | + |
| chr5 | 797149  | 797192  | CSAR_peak_! | 5.62             | + |
| chr5 | 798913  | 798965  | CSAR_peak_! | 8.95             | + |
| chr5 | 808587  | 808612  | CSAR_peak_! | 7.58             | + |
| chr5 | 820800  | 820891  | CSAR_peak_! | 8.28,11.66       | + |
| chr5 | 841455  | 841505  | CSAR_peak_! | 6.21             | + |
| chr5 | 865090  | 865132  | CSAR_peak_! | 5.62             | + |
| chr5 | 865174  | 865192  | CSAR_peak_! | 10.83            | + |
| chr5 | 865423  | 865468  | CSAR_peak_! | 7.26             | + |
| chr5 | 865583  | 865628  | CSAR_peak_! | 6.03             | + |
| chr5 | 868629  | 868769  | CSAR_peak_! | 7.27             | + |
| chr5 | 884212  | 884246  | CSAR_peak_! | 12.17            | + |
| chr5 | 884487  | 884582  | CSAR_peak_! | 19.36            | + |
| chr5 | 884593  | 884657  | CSAR_peak_! | 17.82,6.02       | + |
| chr5 | 884733  | 884796  | CSAR_peak_! | 12.13,9.58       | + |
| chr5 | 884936  | 884973  | CSAR_peak_! | 9.58             | + |
| chr5 | 890025  | 890075  | CSAR_peak_! | 7.58             | + |
| chr5 | 890096  | 890168  | CSAR_peak_! | 8.39             | + |
| chr5 | 892659  | 892709  | CSAR_peak_! | 6.21             | + |
| chr5 | 935040  | 935084  | CSAR_peak_! | 6.21             | + |
| chr5 | 936510  | 936546  | CSAR_peak_! | 6.21             | + |
| chr5 | 936826  | 936895  | CSAR_peak_! | 6.03,13.44       | + |
| chr5 | 939979  | 940024  | CSAR_peak_! | 6.21             | + |
| chr5 | 983043  | 983115  | CSAR_peak_! | 8.95             | + |
| chr5 | 1019568 | 1019601 | CSAR_peak_! | 6.95             | + |
| chr5 | 1048598 | 1048649 | CSAR_peak_! | 8.28             | + |
| chr5 | 1049404 | 1049469 | CSAR_peak_! | 6.21             | + |
| chr5 | 1051748 | 1051761 | CSAR_peak_! | 6.21             | + |
| chr5 | 1052864 | 1052905 | CSAR_peak_! | 6.21             | + |
| chr5 | 1053573 | 1053668 | CSAR_peak_! | 6.21             | + |
| chr5 | 1090600 | 1090755 | CSAR_peak_! | 11.14,13.51,7.27 | + |
| chr5 | 1090883 | 1090978 | CSAR_peak_! | 13.48            | + |
| chr5 | 1091237 | 1091310 | CSAR_peak_! | 9.58             | + |
| chr5 | 1091724 | 1091784 | CSAR_peak_! | 9.58,5.62,8.9    | + |
| chr5 | 1091878 | 1091943 | CSAR_peak_! | 12.13            | + |
| chr5 | 1092030 | 1092090 | CSAR_peak_! | 7.27,16.11,7.27  | + |
| chr5 | 1092541 | 1092589 | CSAR_peak_! | 8.39             | + |

|      |         |         |             |               |   |
|------|---------|---------|-------------|---------------|---|
| chr5 | 1092606 | 1092738 | CSAR_peak_! | 7.27,7.27     | + |
| chr5 | 1132065 | 1132110 | CSAR_peak_! | 13.44         | + |
| chr5 | 1132444 | 1132537 | CSAR_peak_! | 10.83,20.94,  | + |
| chr5 | 1132656 | 1132673 | CSAR_peak_! | 8.39          | + |
| chr5 | 1133170 | 1133234 | CSAR_peak_! | 15            | + |
| chr5 | 1135994 | 1136009 | CSAR_peak_! | 7.27          | + |
| chr5 | 1136566 | 1136651 | CSAR_peak_! | 6.03          | + |
| chr5 | 1137370 | 1137407 | CSAR_peak_! | 8.5           | + |
| chr5 | 1137539 | 1137609 | CSAR_peak_! | 10.83         | + |
| chr5 | 1137696 | 1137723 | CSAR_peak_! | 6.21          | + |
| chr5 | 1137863 | 1137913 | CSAR_peak_! | 8.39          | + |
| chr5 | 1146807 | 1146876 | CSAR_peak_! | 7.58          | + |
| chr5 | 1146940 | 1146983 | CSAR_peak_! | 6.57,8.39     | + |
| chr5 | 1147344 | 1147421 | CSAR_peak_! | 9.58,18.95,8. | + |
| chr5 | 1192451 | 1192466 | CSAR_peak_! | 6.03          | + |
| chr5 | 1194105 | 1194148 | CSAR_peak_! | 8.39          | + |
| chr5 | 1194497 | 1194546 | CSAR_peak_! | 7.27          | + |
| chr5 | 1194604 | 1194663 | CSAR_peak_! | 6.21          | + |
| chr5 | 1197830 | 1197877 | CSAR_peak_! | 9.58          | + |
| chr5 | 1244778 | 1244831 | CSAR_peak_! | 8.39          | + |
| chr5 | 1245043 | 1245091 | CSAR_peak_! | 6.21          | + |
| chr5 | 1260810 | 1260944 | CSAR_peak_! | 6.44,6.95,5.6 | + |
| chr5 | 1261082 | 1261150 | CSAR_peak_! | 8.39          | + |
| chr5 | 1263143 | 1263222 | CSAR_peak_! | 11.14         | + |
| chr5 | 1281026 | 1281066 | CSAR_peak_! | 7.58          | + |
| chr5 | 1288014 | 1288057 | CSAR_peak_! | 9.58          | + |
| chr5 | 1288133 | 1288205 | CSAR_peak_! | 13.48,7.27    | + |
| chr5 | 1313463 | 1313515 | CSAR_peak_! | 6.21          | + |
| chr5 | 1314775 | 1314813 | CSAR_peak_! | 7.26          | + |
| chr5 | 1314905 | 1314919 | CSAR_peak_! | 7.92          | + |
| chr5 | 1315447 | 1315490 | CSAR_peak_! | 6.21          | + |
| chr5 | 1316188 | 1316298 | CSAR_peak_! | 6.57,7.27     | + |
| chr5 | 1321826 | 1321861 | CSAR_peak_! | 6.21          | + |
| chr5 | 1321906 | 1321971 | CSAR_peak_! | 7.58          | + |
| chr5 | 1322066 | 1322128 | CSAR_peak_! | 12.17         | + |
| chr5 | 1322235 | 1322265 | CSAR_peak_! | 7.7           | + |
| chr5 | 1361152 | 1361199 | CSAR_peak_! | 8.65          | + |
| chr5 | 1391390 | 1391427 | CSAR_peak_! | 7.27          | + |
| chr5 | 1391477 | 1391518 | CSAR_peak_! | 7.27          | + |
| chr5 | 1391862 | 1391914 | CSAR_peak_! | 6.21          | + |
| chr5 | 1447514 | 1447561 | CSAR_peak_! | 7.27          | + |
| chr5 | 1448528 | 1448575 | CSAR_peak_! | 7.92          | + |



|      |         |         |             |                 |   |
|------|---------|---------|-------------|-----------------|---|
| chr5 | 1477883 | 1477923 | CSAR_peak_! | 6.21            | + |
| chr5 | 1477966 | 1478014 | CSAR_peak_! | 15.56,9.72,1.1  | + |
| chr5 | 1478632 | 1478686 | CSAR_peak_! | 14.88           | + |
| chr5 | 1479004 | 1479045 | CSAR_peak_! | 6.21            | + |
| chr5 | 1519812 | 1519857 | CSAR_peak_! | 7.27            | + |
| chr5 | 1520334 | 1520410 | CSAR_peak_! | 16.33           | + |
| chr5 | 1520476 | 1520519 | CSAR_peak_! | 10.02           | + |
| chr5 | 1520527 | 1520585 | CSAR_peak_! | 14.85           | + |
| chr5 | 1520597 | 1520729 | CSAR_peak_! | 5.62,6.64,8.2   | + |
| chr5 | 1520746 | 1520815 | CSAR_peak_! | 16.54,12.17     | + |
| chr5 | 1520949 | 1521032 | CSAR_peak_! | 7.06,6.21       | + |
| chr5 | 1521061 | 1521116 | CSAR_peak_! | 9.58            | + |
| chr5 | 1521205 | 1521282 | CSAR_peak_! | 18.73,8.12,6.1  | + |
| chr5 | 1521378 | 1521548 | CSAR_peak_! | 12.13,12.94,1.1 | + |
| chr5 | 1521633 | 1521748 | CSAR_peak_! | 21.56           | + |
| chr5 | 1521779 | 1521937 | CSAR_peak_! | 9.72,8.44,7.2   | + |
| chr5 | 1521960 | 1522004 | CSAR_peak_! | 8.39            | + |
| chr5 | 1522046 | 1522090 | CSAR_peak_! | 8.39,6.21       | + |
| chr5 | 1522179 | 1522312 | CSAR_peak_! | 16.11           | + |
| chr5 | 1522724 | 1522772 | CSAR_peak_! | 16.33           | + |
| chr5 | 1549148 | 1549178 | CSAR_peak_! | 6.21            | + |
| chr5 | 1571234 | 1571289 | CSAR_peak_! | 6.21            | + |
| chr5 | 1602214 | 1602273 | CSAR_peak_! | 10.83,6.12      | + |
| chr5 | 1602284 | 1602460 | CSAR_peak_! | 25.91,7.78,1.1  | + |
| chr5 | 1602525 | 1602660 | CSAR_peak_! | 8.39,8.72,10.1  | + |
| chr5 | 1602674 | 1602906 | CSAR_peak_! | 7.23,23.04,1.1  | + |
| chr5 | 1602929 | 1602957 | CSAR_peak_! | 6.85            | + |
| chr5 | 1602996 | 1603026 | CSAR_peak_! | 6.21            | + |
| chr5 | 1603084 | 1603417 | CSAR_peak_! | 19.18,16.36,1.1 | + |
| chr5 | 1603437 | 1603528 | CSAR_peak_! | 13.81,14.54     | + |
| chr5 | 1603563 | 1603715 | CSAR_peak_! | 29.16,21.98     | + |
| chr5 | 1609376 | 1609418 | CSAR_peak_! | 6.21            | + |
| chr5 | 1609612 | 1609676 | CSAR_peak_! | 10.95           | + |
| chr5 | 1609769 | 1609843 | CSAR_peak_! | 10.83           | + |
| chr5 | 1610726 | 1610801 | CSAR_peak_! | 7.27            | + |
| chr5 | 1612589 | 1612656 | CSAR_peak_! | 6.44            | + |
| chr5 | 1624064 | 1624138 | CSAR_peak_! | 9.58            | + |
| chr5 | 1636411 | 1636452 | CSAR_peak_! | 6.03            | + |
| chr5 | 1672244 | 1672328 | CSAR_peak_! | 7.27            | + |
| chr5 | 1672465 | 1672523 | CSAR_peak_! | 7.27            | + |
| chr5 | 1672548 | 1672572 | CSAR_peak_! | 7.78            | + |
| chr5 | 1672620 | 1672671 | CSAR_peak_! | 12.13           | + |

|      |         |         |             |               |   |
|------|---------|---------|-------------|---------------|---|
| chr5 | 1672790 | 1672798 | CSAR_peak_! | 7.92,6.21     | + |
| chr5 | 1672902 | 1672946 | CSAR_peak_! | 7.27          | + |
| chr5 | 1672966 | 1673084 | CSAR_peak_! | 10.62,9.58    | + |
| chr5 | 1673087 | 1673224 | CSAR_peak_! | 10.83,11.88,  | + |
| chr5 | 1673326 | 1673363 | CSAR_peak_! | 8.39          | + |
| chr5 | 1673396 | 1673450 | CSAR_peak_! | 8.39,5.62,8.3 | + |
| chr5 | 1673716 | 1673803 | CSAR_peak_! | 19.36         | + |
| chr5 | 1674326 | 1674377 | CSAR_peak_! | 13.48,9.58    | + |
| chr5 | 1674443 | 1674573 | CSAR_peak_! | 6.21,7.27     | + |
| chr5 | 1767106 | 1767159 | CSAR_peak_! | 7.27          | + |
| chr5 | 1768975 | 1769039 | CSAR_peak_! | 6.57          | + |
| chr5 | 1771319 | 1771390 | CSAR_peak_! | 6.03          | + |
| chr5 | 1808598 | 1808718 | CSAR_peak_! | 86.02,47.38   | + |
| chr5 | 1808800 | 1808910 | CSAR_peak_! | 14.09,9.78    | + |
| chr5 | 1808940 | 1809072 | CSAR_peak_! | 27.94,36.22   | + |
| chr5 | 1838610 | 1838672 | CSAR_peak_! | 7.58          | + |
| chr5 | 1838814 | 1838895 | CSAR_peak_! | 8.65,10.02    | + |
| chr5 | 1845648 | 1845694 | CSAR_peak_! | 6.21          | + |
| chr5 | 1845922 | 1845988 | CSAR_peak_! | 6.02          | + |
| chr5 | 1846835 | 1846856 | CSAR_peak_! | 8.39          | + |
| chr5 | 1847437 | 1847477 | CSAR_peak_! | 13.48,10.83   | + |
| chr5 | 1847726 | 1847785 | CSAR_peak_! | 8.39,8.95     | + |
| chr5 | 1849197 | 1849234 | CSAR_peak_! | 13.48         | + |
| chr5 | 1849535 | 1849564 | CSAR_peak_! | 6.21          | + |
| chr5 | 1849592 | 1849628 | CSAR_peak_! | 7.27          | + |
| chr5 | 1849715 | 1849803 | CSAR_peak_! | 6.57,6.44     | + |
| chr5 | 1849908 | 1849983 | CSAR_peak_! | 10.95,17.4,7. | + |
| chr5 | 1850045 | 1850103 | CSAR_peak_! | 6.45,6.03     | + |
| chr5 | 1850597 | 1850639 | CSAR_peak_! | 8.39          | + |
| chr5 | 1852001 | 1852046 | CSAR_peak_! | 14.76         | + |
| chr5 | 1852139 | 1852151 | CSAR_peak_! | 8.65          | + |
| chr5 | 1852173 | 1852220 | CSAR_peak_! | 8.39          | + |
| chr5 | 1881693 | 1881743 | CSAR_peak_! | 7.27          | + |
| chr5 | 1881788 | 1881834 | CSAR_peak_! | 7.27          | + |
| chr5 | 1883767 | 1883809 | CSAR_peak_! | 7.92          | + |
| chr5 | 2064093 | 2064134 | CSAR_peak_! | 6.21          | + |
| chr5 | 2064347 | 2064396 | CSAR_peak_! | 6.57          | + |
| chr5 | 2064660 | 2064744 | CSAR_peak_! | 12.13         | + |
| chr5 | 2064748 | 2064834 | CSAR_peak_! | 6.21,6.95,6.9 | + |
| chr5 | 2065037 | 2065121 | CSAR_peak_! | 16.54,10.18   | + |
| chr5 | 2065271 | 2065332 | CSAR_peak_! | 6.54          | + |
| chr5 | 2065552 | 2065696 | CSAR_peak_! | 12.98,22.56   | + |

|      |         |         |             |               |   |
|------|---------|---------|-------------|---------------|---|
| chr5 | 2111187 | 2111239 | CSAR_peak_! | 7.27          | + |
| chr5 | 2132501 | 2132564 | CSAR_peak_! | 17.82         | + |
| chr5 | 2132866 | 2132914 | CSAR_peak_! | 8.39,8.39     | + |
| chr5 | 2132971 | 2133026 | CSAR_peak_! | 8.28,6.21     | + |
| chr5 | 2133217 | 2133253 | CSAR_peak_! | 8.39          | + |
| chr5 | 2133489 | 2133531 | CSAR_peak_! | 7.27          | + |
| chr5 | 2134103 | 2134145 | CSAR_peak_! | 6.21          | + |
| chr5 | 2134432 | 2134505 | CSAR_peak_! | 16.54,9.77    | + |
| chr5 | 2134648 | 2134719 | CSAR_peak_! | 13.44,13.51   | + |
| chr5 | 2134738 | 2134772 | CSAR_peak_! | 6.57          | + |
| chr5 | 2134803 | 2134946 | CSAR_peak_! | 8.12,6.92,6.5 | + |
| chr5 | 2135786 | 2135847 | CSAR_peak_! | 11.14         | + |
| chr5 | 2153848 | 2153934 | CSAR_peak_! | 9.77          | + |
| chr5 | 2156213 | 2156282 | CSAR_peak_! | 8.39          | + |
| chr5 | 2167747 | 2167811 | CSAR_peak_! | 12.13         | + |
| chr5 | 2167892 | 2167941 | CSAR_peak_! | 7.29          | + |
| chr5 | 2168007 | 2168106 | CSAR_peak_! | 6.95,7.58,6.2 | + |
| chr5 | 2168303 | 2168395 | CSAR_peak_! | 14.88,10.57,1 | + |
| chr5 | 2168418 | 2168471 | CSAR_peak_! | 8.39,6.21     | + |
| chr5 | 2168496 | 2168558 | CSAR_peak_! | 9.77          | + |
| chr5 | 2168583 | 2168703 | CSAR_peak_! | 16.92,18.97   | + |
| chr5 | 2168764 | 2168904 | CSAR_peak_! | 9.72,17.82    | + |
| chr5 | 2168969 | 2169060 | CSAR_peak_! | 8.39          | + |
| chr5 | 2169764 | 2169835 | CSAR_peak_! | 7.27          | + |
| chr5 | 2170295 | 2170383 | CSAR_peak_! | 10.02         | + |
| chr5 | 2204854 | 2204903 | CSAR_peak_! | 8.52          | + |
| chr5 | 2205093 | 2205173 | CSAR_peak_! | 21.56         | + |
| chr5 | 2205254 | 2205292 | CSAR_peak_! | 11.66         | + |
| chr5 | 2205614 | 2205671 | CSAR_peak_! | 12.31,8.39    | + |
| chr5 | 2209113 | 2209191 | CSAR_peak_! | 7.27          | + |
| chr5 | 2281067 | 2281146 | CSAR_peak_! | 14.88,6.01,9. | + |
| chr5 | 2282077 | 2282152 | CSAR_peak_! | 8.65          | + |
| chr5 | 2282695 | 2282738 | CSAR_peak_! | 5.67          | + |
| chr5 | 2283191 | 2283243 | CSAR_peak_! | 8.65          | + |
| chr5 | 2293790 | 2293831 | CSAR_peak_! | 8.39,10.83    | + |
| chr5 | 2295051 | 2295112 | CSAR_peak_! | 8.65,8.95     | + |
| chr5 | 2295772 | 2295833 | CSAR_peak_! | 20.94,6.22    | + |
| chr5 | 2296182 | 2296228 | CSAR_peak_! | 6.21          | + |
| chr5 | 2296733 | 2296787 | CSAR_peak_! | 8.39          | + |
| chr5 | 2296884 | 2296951 | CSAR_peak_! | 10.83         | + |
| chr5 | 2297252 | 2297316 | CSAR_peak_! | 9.58          | + |
| chr5 | 2298056 | 2298154 | CSAR_peak_! | 7.27,7.27     | + |

|      |         |         |             |               |   |
|------|---------|---------|-------------|---------------|---|
| chr5 | 2298357 | 2298536 | CSAR_peak_! | 18.73,14.88,: | + |
| chr5 | 2300236 | 2300270 | CSAR_peak_! | 6.1           | + |
| chr5 | 2300497 | 2300533 | CSAR_peak_! | 8.39          | + |
| chr5 | 2300901 | 2300977 | CSAR_peak_! | 8.39          | + |
| chr5 | 2301366 | 2301439 | CSAR_peak_! | 8.65          | + |
| chr5 | 2301574 | 2301649 | CSAR_peak_! | 6.21          | + |
| chr5 | 2301726 | 2301793 | CSAR_peak_! | 6.03          | + |
| chr5 | 2302180 | 2302210 | CSAR_peak_! | 7.27          | + |
| chr5 | 2302625 | 2302664 | CSAR_peak_! | 7.92          | + |
| chr5 | 2302785 | 2302849 | CSAR_peak_! | 8.39          | + |
| chr5 | 2318366 | 2318458 | CSAR_peak_! | 7.26,6.57     | + |
| chr5 | 2331536 | 2331576 | CSAR_peak_! | 7.27          | + |
| chr5 | 2331814 | 2331866 | CSAR_peak_! | 7.27          | + |
| chr5 | 2333083 | 2333138 | CSAR_peak_! | 6.1           | + |
| chr5 | 2335510 | 2335582 | CSAR_peak_! | 13.44,6.95    | + |
| chr5 | 2356123 | 2356171 | CSAR_peak_! | 8.39          | + |
| chr5 | 2356210 | 2356261 | CSAR_peak_! | 9.87,9.94,8.7 | + |
| chr5 | 2356296 | 2356363 | CSAR_peak_! | 7.92,9.77     | + |
| chr5 | 2356411 | 2356629 | CSAR_peak_! | 9.04,9.58,10. | + |
| chr5 | 2356729 | 2356751 | CSAR_peak_! | 6.36          | + |
| chr5 | 2356859 | 2356892 | CSAR_peak_! | 8.3           | + |
| chr5 | 2356964 | 2357055 | CSAR_peak_! | 9.72,10.53,1. | + |
| chr5 | 2357093 | 2357142 | CSAR_peak_! | 12.68         | + |
| chr5 | 2357161 | 2357291 | CSAR_peak_! | 16.55,17.36,: | + |
| chr5 | 2357358 | 2357418 | CSAR_peak_! | 10.42         | + |
| chr5 | 2357438 | 2357524 | CSAR_peak_! | 10.7,11.47,6. | + |
| chr5 | 2357608 | 2357770 | CSAR_peak_! | 10.31,19.96,! | + |
| chr5 | 2357882 | 2357986 | CSAR_peak_! | 10.95,7.27    | + |
| chr5 | 2357990 | 2358026 | CSAR_peak_! | 6.21          | + |
| chr5 | 2358107 | 2358203 | CSAR_peak_! | 17.51,8.5     | + |
| chr5 | 2539740 | 2539781 | CSAR_peak_! | 6.03          | + |
| chr5 | 2589587 | 2589621 | CSAR_peak_! | 6.85          | + |
| chr5 | 2589710 | 2589750 | CSAR_peak_! | 12.17         | + |
| chr5 | 2636952 | 2637060 | CSAR_peak_! | 16.05,10.95   | + |
| chr5 | 2682999 | 2683055 | CSAR_peak_! | 9.58          | + |
| chr5 | 2683329 | 2683389 | CSAR_peak_! | 7.27,8.39     | + |
| chr5 | 2684831 | 2684884 | CSAR_peak_! | 7.27          | + |
| chr5 | 2686668 | 2686752 | CSAR_peak_! | 7.27          | + |
| chr5 | 2687095 | 2687167 | CSAR_peak_! | 10.83,6.21    | + |
| chr5 | 2687960 | 2688040 | CSAR_peak_! | 8.39,7.92     | + |
| chr5 | 2707722 | 2707763 | CSAR_peak_! | 6.21          | + |
| chr5 | 2714209 | 2714254 | CSAR_peak_! | 6.57          | + |

|      |         |         |             |               |   |
|------|---------|---------|-------------|---------------|---|
| chr5 | 2718564 | 2718643 | CSAR_peak_! | 13.48,12.31   | + |
| chr5 | 2719044 | 2719060 | CSAR_peak_! | 6.21          | + |
| chr5 | 2726392 | 2726442 | CSAR_peak_! | 6.03          | + |
| chr5 | 2748222 | 2748275 | CSAR_peak_! | 7.73          | + |
| chr5 | 2748285 | 2748320 | CSAR_peak_! | 7.95          | + |
| chr5 | 2748324 | 2748388 | CSAR_peak_! | 10.62         | + |
| chr5 | 2748632 | 2748718 | CSAR_peak_! | 6.78          | + |
| chr5 | 2748755 | 2748808 | CSAR_peak_! | 19.57,9.72,7. | + |
| chr5 | 2748872 | 2748933 | CSAR_peak_! | 19.36,13.37   | + |
| chr5 | 2748938 | 2749008 | CSAR_peak_! | 12.5,10.94    | + |
| chr5 | 2749039 | 2749085 | CSAR_peak_! | 5.62          | + |
| chr5 | 2749108 | 2749203 | CSAR_peak_! | 7.92,6.92,6.3 | + |
| chr5 | 2749235 | 2749277 | CSAR_peak_! | 6.21          | + |
| chr5 | 2749294 | 2749337 | CSAR_peak_! | 10.83,6.28,6. | + |
| chr5 | 2749354 | 2749501 | CSAR_peak_! | 14.88,12.31   | + |
| chr5 | 2749643 | 2749692 | CSAR_peak_! | 13.48         | + |
| chr5 | 2749837 | 2749889 | CSAR_peak_! | 7.58          | + |
| chr5 | 2749913 | 2749984 | CSAR_peak_! | 7.58,13.48,8. | + |
| chr5 | 2750144 | 2750208 | CSAR_peak_! | 6.57,15.68    | + |
| chr5 | 2750351 | 2750445 | CSAR_peak_! | 7.34,7.58,6.2 | + |
| chr5 | 2750525 | 2750591 | CSAR_peak_! | 10.02         | + |
| chr5 | 2750618 | 2750708 | CSAR_peak_! | 14.96,7.17    | + |
| chr5 | 2750883 | 2750945 | CSAR_peak_! | 8.39          | + |
| chr5 | 2751038 | 2751079 | CSAR_peak_! | 7.27          | + |
| chr5 | 2751300 | 2751340 | CSAR_peak_! | 6.21          | + |
| chr5 | 2751553 | 2751590 | CSAR_peak_! | 13.48         | + |
| chr5 | 2784490 | 2784540 | CSAR_peak_! | 6.57          | + |
| chr5 | 2855007 | 2855059 | CSAR_peak_! | 8.39,16.33    | + |
| chr5 | 2855210 | 2855362 | CSAR_peak_! | 23.49,14.63,( | + |
| chr5 | 2855363 | 2855475 | CSAR_peak_! | 18.73         | + |
| chr5 | 2855641 | 2855724 | CSAR_peak_! | 14.76         | + |
| chr5 | 2855780 | 2855844 | CSAR_peak_! | 8.39,8.39     | + |
| chr5 | 2855973 | 2856220 | CSAR_peak_! | 33.08,32.83   | + |
| chr5 | 2856235 | 2856254 | CSAR_peak_! | 6.21          | + |
| chr5 | 2856297 | 2856379 | CSAR_peak_! | 16.33         | + |
| chr5 | 2856395 | 2856517 | CSAR_peak_! | 20.94,8.3     | + |
| chr5 | 2856780 | 2856812 | CSAR_peak_! | 10.02,9.58    | + |
| chr5 | 2857113 | 2857227 | CSAR_peak_! | 15,6.96,12.3: | + |
| chr5 | 2857272 | 2857320 | CSAR_peak_! | 6.21          | + |
| chr5 | 2857435 | 2857530 | CSAR_peak_! | 8.39,8.39     | + |
| chr5 | 2857550 | 2857635 | CSAR_peak_! | 13.44,16.33   | + |
| chr5 | 2857642 | 2857797 | CSAR_peak_! | 19.36,27.94   | + |

|      |         |         |             |                 |
|------|---------|---------|-------------|-----------------|
| chr5 | 2857834 | 2858008 | CSAR_peak_! | 13.48,7.26,8. + |
| chr5 | 2858009 | 2858032 | CSAR_peak_! | 17.51 +         |
| chr5 | 2858060 | 2858168 | CSAR_peak_! | 16.33,11.63 +   |
| chr5 | 2858327 | 2858353 | CSAR_peak_! | 6.57 +          |
| chr5 | 2858515 | 2858573 | CSAR_peak_! | 6.44 +          |
| chr5 | 2858587 | 2858799 | CSAR_peak_! | 7.58,7.73,7.2 + |
| chr5 | 2859152 | 2859270 | CSAR_peak_! | 12.5,20.13,1(+  |
| chr5 | 2859297 | 2859426 | CSAR_peak_! | 10.95 +         |
| chr5 | 2859941 | 2860012 | CSAR_peak_! | 9.58 +          |
| chr5 | 2860243 | 2860298 | CSAR_peak_! | 6.44 +          |
| chr5 | 2860436 | 2860481 | CSAR_peak_! | 12.13 +         |
| chr5 | 2914912 | 2914950 | CSAR_peak_! | 6.03 +          |
| chr5 | 2915556 | 2915608 | CSAR_peak_! | 7.27 +          |
| chr5 | 2916510 | 2916548 | CSAR_peak_! | 6.21 +          |
| chr5 | 2917234 | 2917307 | CSAR_peak_! | 6.21 +          |
| chr5 | 2922381 | 2922470 | CSAR_peak_! | 8.53,10.95 +    |
| chr5 | 2923047 | 2923087 | CSAR_peak_! | 6.21 +          |
| chr5 | 2923204 | 2923265 | CSAR_peak_! | 6.21 +          |
| chr5 | 2923709 | 2923822 | CSAR_peak_! | 7.27,6.02 +     |
| chr5 | 2923981 | 2923996 | CSAR_peak_! | 7.27 +          |
| chr5 | 2924497 | 2924539 | CSAR_peak_! | 13.48 +         |
| chr5 | 2925758 | 2925799 | CSAR_peak_! | 6.21 +          |
| chr5 | 2925870 | 2925910 | CSAR_peak_! | 6.95 +          |
| chr5 | 2975012 | 2975210 | CSAR_peak_! | 21.97,108.21 +  |
| chr5 | 3005356 | 3005427 | CSAR_peak_! | 11.16,6.57 +    |
| chr5 | 3052803 | 3052869 | CSAR_peak_! | 6.52,6.11 +     |
| chr5 | 3052943 | 3052962 | CSAR_peak_! | 6.21 +          |
| chr5 | 3053991 | 3054042 | CSAR_peak_! | 11.66 +         |
| chr5 | 3073273 | 3073319 | CSAR_peak_! | 7.27 +          |
| chr5 | 3073389 | 3073437 | CSAR_peak_! | 12.5 +          |
| chr5 | 3073827 | 3073926 | CSAR_peak_! | 8.13 +          |
| chr5 | 3074094 | 3074145 | CSAR_peak_! | 6.57,7.92 +     |
| chr5 | 3074646 | 3074704 | CSAR_peak_! | 22.56,7.26 +    |
| chr5 | 3075338 | 3075393 | CSAR_peak_! | 6.57 +          |
| chr5 | 3075481 | 3075536 | CSAR_peak_! | 6.22 +          |
| chr5 | 3075542 | 3075616 | CSAR_peak_! | 6.72,9.79 +     |
| chr5 | 3075802 | 3075846 | CSAR_peak_! | 6.22 +          |
| chr5 | 3076130 | 3076172 | CSAR_peak_! | 14.88 +         |
| chr5 | 3076265 | 3076273 | CSAR_peak_! | 6.95 +          |
| chr5 | 3076473 | 3076542 | CSAR_peak_! | 17.52,21.35,+   |
| chr5 | 3076607 | 3076632 | CSAR_peak_! | 6.57,6.21 +     |
| chr5 | 3076764 | 3076814 | CSAR_peak_! | 9.61,6.57 +     |

|      |         |         |             |                |   |
|------|---------|---------|-------------|----------------|---|
| chr5 | 3158114 | 3158167 | CSAR_peak_! | 6.57           | + |
| chr5 | 3159294 | 3159355 | CSAR_peak_! | 7.27           | + |
| chr5 | 3159845 | 3159889 | CSAR_peak_( | 16.08,7.27     | + |
| chr5 | 3239764 | 3239811 | CSAR_peak_( | 6.21           | + |
| chr5 | 3343382 | 3343523 | CSAR_peak_; | 25.46,6.97,4.1 | + |
| chr5 | 3343577 | 3343729 | CSAR_peak_! | 10.68,80.45,   | + |
| chr5 | 3377876 | 3377929 | CSAR_peak_! | 8.39           | + |
| chr5 | 3378184 | 3378269 | CSAR_peak_( | 8.39,8.39      | + |
| chr5 | 3380218 | 3380267 | CSAR_peak_; | 5.62,12.31     | + |
| chr5 | 3380495 | 3380520 | CSAR_peak_( | 6.21           | + |
| chr5 | 3380521 | 3380558 | CSAR_peak_; | 8.92           | + |
| chr5 | 3380569 | 3380620 | CSAR_peak_! | 6.57           | + |
| chr5 | 3397824 | 3397849 | CSAR_peak_! | 6.21           | + |
| chr5 | 3399683 | 3399747 | CSAR_peak_( | 6.57           | + |
| chr5 | 3399905 | 3399996 | CSAR_peak_( | 8.65,7.61      | + |
| chr5 | 3408627 | 3408691 | CSAR_peak_; | 10.95,12.13,   | + |
| chr5 | 3409368 | 3409404 | CSAR_peak_; | 7.34           | + |
| chr5 | 3410196 | 3410236 | CSAR_peak_; | 5.62,7.92      | + |
| chr5 | 3411598 | 3411635 | CSAR_peak_; | 6.03           | + |
| chr5 | 3412359 | 3412415 | CSAR_peak_( | 7.27           | + |
| chr5 | 3464638 | 3464674 | CSAR_peak_( | 8.39           | + |
| chr5 | 3497584 | 3497624 | CSAR_peak_( | 8.39           | + |
| chr5 | 3524795 | 3524857 | CSAR_peak_! | 8.39           | + |
| chr5 | 3524921 | 3525062 | CSAR_peak_( | 10.57,15.47,   | + |
| chr5 | 3525064 | 3525297 | CSAR_peak_! | 33.38,12.6     | + |
| chr5 | 3525485 | 3525628 | CSAR_peak_! | 9.79,8.28,8.6  | + |
| chr5 | 3525879 | 3525919 | CSAR_peak_( | 6.57           | + |
| chr5 | 3525921 | 3526014 | CSAR_peak_( | 8.39,10.18,1(  | + |
| chr5 | 3526070 | 3526286 | CSAR_peak_! | 16.11,9.79,1(  | + |
| chr5 | 3526288 | 3526548 | CSAR_peak_! | 13,13.48       | + |
| chr5 | 3554707 | 3554741 | CSAR_peak_! | 7.27           | + |
| chr5 | 3555252 | 3555316 | CSAR_peak_! | 12.13,8.39     | + |
| chr5 | 3555423 | 3555505 | CSAR_peak_! | 12.13,7.27     | + |
| chr5 | 3555569 | 3555612 | CSAR_peak_; | 6.57           | + |
| chr5 | 3555614 | 3555629 | CSAR_peak_( | 9.77           | + |
| chr5 | 3555633 | 3555681 | CSAR_peak_; | 11.66,7.7      | + |
| chr5 | 3556153 | 3556173 | CSAR_peak_( | 8.39           | + |
| chr5 | 3556461 | 3556540 | CSAR_peak_! | 8.09,6.21      | + |
| chr5 | 3569670 | 3569679 | CSAR_peak_( | 6.21           | + |
| chr5 | 3569685 | 3569727 | CSAR_peak_! | 7.27           | + |
| chr5 | 3570222 | 3570255 | CSAR_peak_! | 6.21           | + |
| chr5 | 3570370 | 3570416 | CSAR_peak_( | 6.21           | + |

|      |         |         |             |               |   |
|------|---------|---------|-------------|---------------|---|
| chr5 | 3570513 | 3570580 | CSAR_peak_  | 14.76         | + |
| chr5 | 3622593 | 3622607 | CSAR_peak_  | 6.21          | + |
| chr5 | 3645499 | 3645548 | CSAR_peak_! | 6.21          | + |
| chr5 | 3645773 | 3645919 | CSAR_peak_  | 10.83,7.92    | + |
| chr5 | 3677952 | 3678007 | CSAR_peak_! | 6.57          | + |
| chr5 | 3678371 | 3678459 | CSAR_peak_  | 7.27,7.58     | + |
| chr5 | 3678622 | 3678707 | CSAR_peak_! | 9.61,7.58     | + |
| chr5 | 3680631 | 3680685 | CSAR_peak_  | 8.39          | + |
| chr5 | 3719166 | 3719250 | CSAR_peak_  | 8.39,13.44    | + |
| chr5 | 3719893 | 3719919 | CSAR_peak_! | 6.57          | + |
| chr5 | 3720155 | 3720217 | CSAR_peak_  | 8.39          | + |
| chr5 | 3720519 | 3720548 | CSAR_peak_  | 6.21          | + |
| chr5 | 3720723 | 3720843 | CSAR_peak_  | 13.44,12.17   | + |
| chr5 | 3745087 | 3745139 | CSAR_peak_! | 12.13,7.27    | + |
| chr5 | 3745379 | 3745461 | CSAR_peak_! | 7.34,11.14,1: | + |
| chr5 | 3745543 | 3745582 | CSAR_peak_! | 9.58          | + |
| chr5 | 3745672 | 3745760 | CSAR_peak_! | 18.61,9.76,1: | + |
| chr5 | 3745780 | 3745847 | CSAR_peak_! | 12.13         | + |
| chr5 | 3745949 | 3746009 | CSAR_peak_! | 8.65,7.27     | + |
| chr5 | 3746315 | 3746380 | CSAR_peak_  | 9.58,10.95,7. | + |
| chr5 | 3754398 | 3754448 | CSAR_peak_! | 9.77          | + |
| chr5 | 3754518 | 3754599 | CSAR_peak_  | 10.06         | + |
| chr5 | 3754762 | 3754844 | CSAR_peak_! | 7.58,8.39     | + |
| chr5 | 3754879 | 3754909 | CSAR_peak_  | 6.1           | + |
| chr5 | 3755052 | 3755106 | CSAR_peak_! | 13.59,12.09,: | + |
| chr5 | 3755195 | 3755242 | CSAR_peak_! | 8.75,8.34     | + |
| chr5 | 3755272 | 3755292 | CSAR_peak_  | 7.77          | + |
| chr5 | 3755403 | 3755447 | CSAR_peak_! | 7.58          | + |
| chr5 | 3755504 | 3755563 | CSAR_peak_! | 15.07,20.34   | + |
| chr5 | 3755609 | 3755665 | CSAR_peak_! | 6.12,6.54     | + |
| chr5 | 3755668 | 3755728 | CSAR_peak_! | 12.94,10.83,: | + |
| chr5 | 3755800 | 3755867 | CSAR_peak_! | 9.58,8.39     | + |
| chr5 | 3755997 | 3756153 | CSAR_peak_! | 8.54,10.83,1: | + |
| chr5 | 3756201 | 3756376 | CSAR_peak_! | 10.31,19.98,: | + |
| chr5 | 3756511 | 3756528 | CSAR_peak_  | 8.5           | + |
| chr5 | 3756545 | 3756582 | CSAR_peak_! | 8.54,6.14     | + |
| chr5 | 3756592 | 3756643 | CSAR_peak_! | 5.62          | + |
| chr5 | 3756651 | 3756749 | CSAR_peak_! | 10.07,6.46,7. | + |
| chr5 | 3756797 | 3756882 | CSAR_peak_! | 7.34          | + |
| chr5 | 3756887 | 3756916 | CSAR_peak_  | 16.05         | + |
| chr5 | 3757031 | 3757255 | CSAR_peak_! | 8.7,6.94,18.9 | + |
| chr5 | 3757355 | 3757455 | CSAR_peak_! | 6.36,17.35    | + |



|      |         |         |             |               |   |
|------|---------|---------|-------------|---------------|---|
| chr5 | 3757576 | 3757641 | CSAR_peak_! | 6.1           | + |
| chr5 | 3757667 | 3757761 | CSAR_peak_! | 8.39,13.48    | + |
| chr5 | 3757792 | 3757965 | CSAR_peak_! | 13.44,9.77,1. | + |
| chr5 | 3759521 | 3759573 | CSAR_peak_! | 6.95          | + |
| chr5 | 3760072 | 3760117 | CSAR_peak_! | 8.39          | + |
| chr5 | 3760394 | 3760435 | CSAR_peak_! | 7.92          | + |
| chr5 | 3760609 | 3760666 | CSAR_peak_! | 6.45,7.92     | + |
| chr5 | 3772977 | 3773022 | CSAR_peak_! | 9.77          | + |
| chr5 | 3773113 | 3773165 | CSAR_peak_! | 14.08         | + |
| chr5 | 3773540 | 3773589 | CSAR_peak_! | 7.36          | + |
| chr5 | 3773749 | 3773796 | CSAR_peak_! | 7.58          | + |
| chr5 | 3773914 | 3773965 | CSAR_peak_! | 6.85,6.95     | + |
| chr5 | 3774165 | 3774204 | CSAR_peak_! | 6.21          | + |
| chr5 | 3774802 | 3774858 | CSAR_peak_! | 10.02,27.64   | + |
| chr5 | 3775742 | 3775773 | CSAR_peak_! | 8.39          | + |
| chr5 | 3777759 | 3777810 | CSAR_peak_! | 8.39          | + |
| chr5 | 3777860 | 3777905 | CSAR_peak_! | 7.27          | + |
| chr5 | 3778214 | 3778266 | CSAR_peak_! | 9.58          | + |
| chr5 | 3779755 | 3779826 | CSAR_peak_! | 10.83         | + |
| chr5 | 3780013 | 3780032 | CSAR_peak_! | 7.27          | + |
| chr5 | 3784318 | 3784398 | CSAR_peak_! | 9.35,9.58     | + |
| chr5 | 3784432 | 3784500 | CSAR_peak_! | 12.13         | + |
| chr5 | 3784702 | 3784751 | CSAR_peak_! | 8.39          | + |
| chr5 | 3785202 | 3785296 | CSAR_peak_! | 9.03,13.51    | + |
| chr5 | 3790073 | 3790114 | CSAR_peak_! | 6.95          | + |
| chr5 | 3801041 | 3801078 | CSAR_peak_! | 6.21          | + |
| chr5 | 3887007 | 3887043 | CSAR_peak_! | 6.21          | + |
| chr5 | 3933922 | 3933991 | CSAR_peak_! | 12.13,20.13   | + |
| chr5 | 3934076 | 3934081 | CSAR_peak_! | 6.03          | + |
| chr5 | 3949200 | 3949252 | CSAR_peak_! | 8.39          | + |
| chr5 | 4000428 | 4000463 | CSAR_peak_! | 6.21          | + |
| chr5 | 4014071 | 4014132 | CSAR_peak_! | 9.58          | + |
| chr5 | 4014219 | 4014287 | CSAR_peak_! | 12.13         | + |
| chr5 | 4018117 | 4018165 | CSAR_peak_! | 8.39          | + |
| chr5 | 4019126 | 4019167 | CSAR_peak_! | 6.21          | + |
| chr5 | 4123263 | 4123271 | CSAR_peak_! | 6.21          | + |
| chr5 | 4123776 | 4123836 | CSAR_peak_! | 21.56         | + |
| chr5 | 4124608 | 4124647 | CSAR_peak_! | 6.44          | + |
| chr5 | 4124650 | 4124709 | CSAR_peak_! | 6.45,11.28    | + |
| chr5 | 4124929 | 4124970 | CSAR_peak_! | 7.58          | + |
| chr5 | 4125676 | 4125722 | CSAR_peak_! | 9.58          | + |
| chr5 | 4126013 | 4126040 | CSAR_peak_! | 7.27          | + |

|      |         |         |             |               |   |
|------|---------|---------|-------------|---------------|---|
| chr5 | 4126169 | 4126212 | CSAR_peak_! | 10.83         | + |
| chr5 | 4157146 | 4157203 | CSAR_peak_! | 8.28          | + |
| chr5 | 4157325 | 4157403 | CSAR_peak_! | 13.48         | + |
| chr5 | 4157708 | 4157765 | CSAR_peak_! | 8.95,6.95     | + |
| chr5 | 4157787 | 4157824 | CSAR_peak_! | 7.73          | + |
| chr5 | 4158093 | 4158148 | CSAR_peak_! | 12.17,6.95    | + |
| chr5 | 4159673 | 4159751 | CSAR_peak_! | 8.39          | + |
| chr5 | 4159951 | 4160017 | CSAR_peak_! | 7.27,6.21     | + |
| chr5 | 4160364 | 4160446 | CSAR_peak_! | 10.83,6.03    | + |
| chr5 | 4160694 | 4160730 | CSAR_peak_! | 7.27          | + |
| chr5 | 4160762 | 4160815 | CSAR_peak_! | 10.02         | + |
| chr5 | 4160905 | 4160959 | CSAR_peak_! | 6.44          | + |
| chr5 | 4161066 | 4161180 | CSAR_peak_! | 9.77,9.58,14. | + |
| chr5 | 4176886 | 4176973 | CSAR_peak_! | 6.21          | + |
| chr5 | 4177408 | 4177443 | CSAR_peak_! | 6.21          | + |
| chr5 | 4179399 | 4179445 | CSAR_peak_! | 8.39          | + |
| chr5 | 4196814 | 4196824 | CSAR_peak_! | 6.21          | + |
| chr5 | 4207021 | 4207092 | CSAR_peak_! | 14.88,10.62   | + |
| chr5 | 4207116 | 4207222 | CSAR_peak_! | 8.39          | + |
| chr5 | 4207316 | 4207477 | CSAR_peak_! | 24.17,13.35,1 | + |
| chr5 | 4207571 | 4207661 | CSAR_peak_! | 7.68,6.37     | + |
| chr5 | 4207761 | 4207804 | CSAR_peak_! | 7.58          | + |
| chr5 | 4207937 | 4207971 | CSAR_peak_! | 8.39          | + |
| chr5 | 4218984 | 4219142 | CSAR_peak_! | 20.94,14.36,1 | + |
| chr5 | 4219168 | 4219343 | CSAR_peak_! | 17.37,7.27    | + |
| chr5 | 4219530 | 4219586 | CSAR_peak_! | 7.34,7.36     | + |
| chr5 | 4219642 | 4219685 | CSAR_peak_! | 6.85          | + |
| chr5 | 4219734 | 4219768 | CSAR_peak_! | 8.3           | + |
| chr5 | 4219903 | 4219989 | CSAR_peak_! | 6.57          | + |
| chr5 | 4220166 | 4220227 | CSAR_peak_! | 9.58,8.39     | + |
| chr5 | 4220312 | 4220324 | CSAR_peak_! | 7.27          | + |
| chr5 | 4264786 | 4264835 | CSAR_peak_! | 7.27          | + |
| chr5 | 4294437 | 4294628 | CSAR_peak_! | 8.39,16.33,1  | + |
| chr5 | 4294892 | 4294994 | CSAR_peak_! | 6.21          | + |
| chr5 | 4299186 | 4299253 | CSAR_peak_! | 7.58          | + |
| chr5 | 4339428 | 4339477 | CSAR_peak_! | 7.27          | + |
| chr5 | 4340133 | 4340160 | CSAR_peak_! | 7.58          | + |
| chr5 | 4340309 | 4340359 | CSAR_peak_! | 6.57          | + |
| chr5 | 4345883 | 4345939 | CSAR_peak_! | 7.7           | + |
| chr5 | 4346132 | 4346166 | CSAR_peak_! | 12.13         | + |
| chr5 | 4348555 | 4348588 | CSAR_peak_! | 6.21          | + |
| chr5 | 4352002 | 4352040 | CSAR_peak_! | 6.21          | + |

|      |         |         |             |                |   |
|------|---------|---------|-------------|----------------|---|
| chr5 | 4352274 | 4352319 | CSAR_peak_! | 8.39,6.57      | + |
| chr5 | 4352978 | 4353034 | CSAR_peak_! | 16.11          | + |
| chr5 | 4353565 | 4353594 | CSAR_peak_! | 8.39           | + |
| chr5 | 4353643 | 4353700 | CSAR_peak_! | 6.03           | + |
| chr5 | 4354251 | 4354322 | CSAR_peak_! | 5.62           | + |
| chr5 | 4368356 | 4368376 | CSAR_peak_! | 6.21           | + |
| chr5 | 4369750 | 4369803 | CSAR_peak_! | 7.27           | + |
| chr5 | 4399577 | 4399659 | CSAR_peak_! | 9.61           | + |
| chr5 | 4400585 | 4400673 | CSAR_peak_! | 6.95           | + |
| chr5 | 4402253 | 4402308 | CSAR_peak_! | 10.83          | + |
| chr5 | 4432688 | 4432760 | CSAR_peak_! | 10.29,7.63     | + |
| chr5 | 4433222 | 4433274 | CSAR_peak_! | 10.33          | + |
| chr5 | 4433413 | 4433465 | CSAR_peak_! | 17.4           | + |
| chr5 | 4433554 | 4433610 | CSAR_peak_! | 7.27           | + |
| chr5 | 4433760 | 4433814 | CSAR_peak_! | 7.27,8.39      | + |
| chr5 | 4434240 | 4434319 | CSAR_peak_! | 13.44          | + |
| chr5 | 4435555 | 4435623 | CSAR_peak_! | 8.39           | + |
| chr5 | 4436452 | 4436514 | CSAR_peak_! | 6.21           | + |
| chr5 | 4436702 | 4436752 | CSAR_peak_! | 6.03           | + |
| chr5 | 4440515 | 4440566 | CSAR_peak_! | 6.21           | + |
| chr5 | 4456511 | 4456562 | CSAR_peak_! | 10.83          | + |
| chr5 | 4508952 | 4509000 | CSAR_peak_! | 10.02,7.27,1.: | + |
| chr5 | 4509205 | 4509244 | CSAR_peak_! | 8.95,6.94      | + |
| chr5 | 4509339 | 4509410 | CSAR_peak_! | 8.39           | + |
| chr5 | 4509467 | 4509501 | CSAR_peak_! | 11.14          | + |
| chr5 | 4509984 | 4510119 | CSAR_peak_! | 6.03,6.03,6.5  | + |
| chr5 | 4510447 | 4510469 | CSAR_peak_! | 14.88          | + |
| chr5 | 4510693 | 4510734 | CSAR_peak_! | 6.57           | + |
| chr5 | 4510815 | 4510878 | CSAR_peak_! | 11.14          | + |
| chr5 | 4510991 | 4511041 | CSAR_peak_! | 8.39           | + |
| chr5 | 4511203 | 4511237 | CSAR_peak_! | 6.21           | + |
| chr5 | 4511815 | 4511900 | CSAR_peak_! | 9.41,11.66     | + |
| chr5 | 4511978 | 4512011 | CSAR_peak_! | 16.11          | + |
| chr5 | 4512334 | 4512387 | CSAR_peak_! | 8.65,6.21      | + |
| chr5 | 4512538 | 4512550 | CSAR_peak_! | 6.21           | + |
| chr5 | 4512556 | 4512586 | CSAR_peak_! | 6.57           | + |
| chr5 | 4512720 | 4512791 | CSAR_peak_! | 6.57           | + |
| chr5 | 4512883 | 4512921 | CSAR_peak_! | 9.03           | + |
| chr5 | 4513121 | 4513186 | CSAR_peak_! | 8.09,6.44      | + |
| chr5 | 4513512 | 4513553 | CSAR_peak_! | 9.58           | + |
| chr5 | 4513643 | 4513747 | CSAR_peak_! | 13.51          | + |
| chr5 | 4513816 | 4513890 | CSAR_peak_! | 6.64,8.65,6.0  | + |

|      |         |         |             |                |
|------|---------|---------|-------------|----------------|
| chr5 | 4513916 | 4514026 | CSAR_peak_  | 6.44,6.31,10.+ |
| chr5 | 4514044 | 4514189 | CSAR_peak_  | 21.94,10.83,+  |
| chr5 | 4536490 | 4536533 | CSAR_peak_  | 6.21 +         |
| chr5 | 4537659 | 4537704 | CSAR_peak_  | 7.92 +         |
| chr5 | 4537846 | 4537892 | CSAR_peak_! | 7.27 +         |
| chr5 | 4556306 | 4556345 | CSAR_peak_! | 9.58 +         |
| chr5 | 4556378 | 4556396 | CSAR_peak_! | 6.85 +         |
| chr5 | 4556698 | 4556737 | CSAR_peak_! | 6.21 +         |
| chr5 | 4557561 | 4557625 | CSAR_peak_! | 8.39 +         |
| chr5 | 4557751 | 4557862 | CSAR_peak_! | 12.31 +        |
| chr5 | 4557908 | 4558078 | CSAR_peak_! | 12.5,10.7,23.+ |
| chr5 | 4558346 | 4558421 | CSAR_peak_! | 10.83 +        |
| chr5 | 4576239 | 4576281 | CSAR_peak_! | 6.21 +         |
| chr5 | 4576439 | 4576449 | CSAR_peak_! | 7.27 +         |
| chr5 | 4576536 | 4576566 | CSAR_peak_! | 12.13 +        |
| chr5 | 4577051 | 4577107 | CSAR_peak_! | 6.21 +         |
| chr5 | 4577184 | 4577271 | CSAR_peak_! | 13.48 +        |
| chr5 | 4598970 | 4598996 | CSAR_peak_! | 6.57 +         |
| chr5 | 4599619 | 4599692 | CSAR_peak_! | 17.51 +        |
| chr5 | 4599780 | 4599790 | CSAR_peak_! | 6.57 +         |
| chr5 | 4601038 | 4601108 | CSAR_peak_! | 12.13 +        |
| chr5 | 4601859 | 4601879 | CSAR_peak_! | 6.21 +         |
| chr5 | 4601967 | 4602021 | CSAR_peak_! | 6.21 +         |
| chr5 | 4602759 | 4602794 | CSAR_peak_! | 7.92 +         |
| chr5 | 4602954 | 4602968 | CSAR_peak_! | 8.65 +         |
| chr5 | 4603532 | 4603610 | CSAR_peak_! | 8.39,6.21,7.9+ |
| chr5 | 4605872 | 4606071 | CSAR_peak_! | 13,12.13,15.+  |
| chr5 | 4606219 | 4606283 | CSAR_peak_! | 13.48 +        |
| chr5 | 4606363 | 4606412 | CSAR_peak_! | 6.57,5.62,8.3+ |
| chr5 | 4606479 | 4606544 | CSAR_peak_! | 9.27 +         |
| chr5 | 4606931 | 4607066 | CSAR_peak_! | 11.14,8.39 +   |
| chr5 | 4607085 | 4607129 | CSAR_peak_! | 7.27 +         |
| chr5 | 4607443 | 4607526 | CSAR_peak_! | 8.28,6.85 +    |
| chr5 | 4607652 | 4607713 | CSAR_peak_! | 37.04 +        |
| chr5 | 4607772 | 4607874 | CSAR_peak_! | 9.31,7.26,6.0+ |
| chr5 | 4607983 | 4608031 | CSAR_peak_! | 6.57 +         |
| chr5 | 4608082 | 4608126 | CSAR_peak_! | 7.36 +         |
| chr5 | 4608293 | 4608340 | CSAR_peak_! | 7.92 +         |
| chr5 | 4608346 | 4608386 | CSAR_peak_! | 5.62 +         |
| chr5 | 4608644 | 4608735 | CSAR_peak_! | 12.31 +        |
| chr5 | 4609970 | 4610056 | CSAR_peak_! | 7.92,6.95 +    |
| chr5 | 4610081 | 4610117 | CSAR_peak_! | 7.27 +         |

|      |         |         |             |               |   |
|------|---------|---------|-------------|---------------|---|
| chr5 | 4653786 | 4653837 | CSAR_peak_! | 6.44,6.57     | + |
| chr5 | 4691616 | 4691676 | CSAR_peak_! | 9.58          | + |
| chr5 | 4694905 | 4694982 | CSAR_peak_! | 19.36         | + |
| chr5 | 4695016 | 4695058 | CSAR_peak_! | 9.58          | + |
| chr5 | 4695225 | 4695276 | CSAR_peak_! | 5.62          | + |
| chr5 | 4695303 | 4695366 | CSAR_peak_! | 7.27,8.28     | + |
| chr5 | 4695533 | 4695597 | CSAR_peak_! | 8.39,13.48    | + |
| chr5 | 4695660 | 4695812 | CSAR_peak_! | 14.88,7.06    | + |
| chr5 | 4695995 | 4696069 | CSAR_peak_! | 6.57,7.27     | + |
| chr5 | 4696182 | 4696821 | CSAR_peak_! | 16.33,12.93,  | + |
| chr5 | 4696823 | 4696889 | CSAR_peak_! | 18.73,6.45    | + |
| chr5 | 4760497 | 4760552 | CSAR_peak_! | 8.39          | + |
| chr5 | 4760600 | 4760674 | CSAR_peak_! | 10.83         | + |
| chr5 | 4760695 | 4760768 | CSAR_peak_! | 6.44,7.58,6.2 | + |
| chr5 | 4760792 | 4760874 | CSAR_peak_! | 13.09,9.02    | + |
| chr5 | 4760998 | 4761038 | CSAR_peak_! | 6.87          | + |
| chr5 | 4761201 | 4761262 | CSAR_peak_! | 6.21          | + |
| chr5 | 4761416 | 4761438 | CSAR_peak_! | 11.38         | + |
| chr5 | 4761982 | 4762011 | CSAR_peak_! | 6.21          | + |
| chr5 | 4777038 | 4777086 | CSAR_peak_! | 9.77          | + |
| chr5 | 4777280 | 4777344 | CSAR_peak_! | 6.21,6.21     | + |
| chr5 | 4777838 | 4777959 | CSAR_peak_! | 9.4,10.02,6.3 | + |
| chr5 | 4778040 | 4778101 | CSAR_peak_! | 16.33,16.33   | + |
| chr5 | 4778106 | 4778157 | CSAR_peak_! | 11.14         | + |
| chr5 | 4778301 | 4778335 | CSAR_peak_! | 8.39          | + |
| chr5 | 4778343 | 4778475 | CSAR_peak_! | 8.75,5.75,12. | + |
| chr5 | 4778535 | 4778560 | CSAR_peak_! | 7.27          | + |
| chr5 | 4778707 | 4778832 | CSAR_peak_! | 18.35         | + |
| chr5 | 4778840 | 4778882 | CSAR_peak_! | 12.31,6.21    | + |
| chr5 | 4779003 | 4779104 | CSAR_peak_! | 11.66,9.58,2  | + |
| chr5 | 4816373 | 4816488 | CSAR_peak_! | 8.39,10.83    | + |
| chr5 | 4818259 | 4818316 | CSAR_peak_! | 8.39          | + |
| chr5 | 4820268 | 4820388 | CSAR_peak_! | 13.51,6.45,8. | + |
| chr5 | 4827438 | 4827489 | CSAR_peak_! | 17.82,27.64   | + |
| chr5 | 4827507 | 4827597 | CSAR_peak_! | 6.21,15.96,7. | + |
| chr5 | 4827634 | 4827743 | CSAR_peak_! | 8.28,11.63    | + |
| chr5 | 4827840 | 4827906 | CSAR_peak_! | 6.87          | + |
| chr5 | 4828221 | 4828316 | CSAR_peak_! | 9.58          | + |
| chr5 | 4829871 | 4829925 | CSAR_peak_! | 7.27          | + |
| chr5 | 4830296 | 4830392 | CSAR_peak_! | 6.21          | + |
| chr5 | 4830425 | 4830577 | CSAR_peak_! | 8.39,6.44     | + |
| chr5 | 4830614 | 4830702 | CSAR_peak_! | 8.39          | + |

|      |         |         |             |               |   |
|------|---------|---------|-------------|---------------|---|
| chr5 | 4847823 | 4847883 | CSAR_peak_  | 5.62,12.13    | + |
| chr5 | 4848279 | 4848322 | CSAR_peak_! | 6.45          | + |
| chr5 | 4866317 | 4866395 | CSAR_peak_  | 8.3,8.07,11.0 | + |
| chr5 | 4866461 | 4866542 | CSAR_peak_! | 170.22,6.22,  | + |
| chr5 | 4866635 | 4866700 | CSAR_peak_  | 50.93,36.32   | + |
| chr5 | 4866728 | 4866818 | CSAR_peak_! | 10.49,41.5,4  | + |
| chr5 | 4947774 | 4947826 | CSAR_peak_! | 13.44         | + |
| chr5 | 4948927 | 4948984 | CSAR_peak_! | 9.77,7.92     | + |
| chr5 | 4949121 | 4949162 | CSAR_peak_! | 6.21          | + |
| chr5 | 4959091 | 4959157 | CSAR_peak_! | 13.48         | + |
| chr5 | 4959269 | 4959307 | CSAR_peak_! | 10.83         | + |
| chr5 | 4960442 | 4960575 | CSAR_peak_! | 8.39,8.65     | + |
| chr5 | 4960663 | 4960734 | CSAR_peak_! | 11.14         | + |
| chr5 | 4961401 | 4961444 | CSAR_peak_! | 10.83         | + |
| chr5 | 5092330 | 5092366 | CSAR_peak_! | 6.03          | + |
| chr5 | 5092453 | 5092545 | CSAR_peak_! | 9.58,6.21     | + |
| chr5 | 5092846 | 5092910 | CSAR_peak_! | 8.39          | + |
| chr5 | 5093077 | 5093171 | CSAR_peak_! | 7.27,5.62,6.2 | + |
| chr5 | 5093329 | 5093425 | CSAR_peak_! | 9.41,6.12,7.5 | + |
| chr5 | 5093528 | 5093584 | CSAR_peak_! | 8.65          | + |
| chr5 | 5093587 | 5093666 | CSAR_peak_! | 6.45,6.03     | + |
| chr5 | 5093752 | 5093820 | CSAR_peak_! | 7.26          | + |
| chr5 | 5131548 | 5131599 | CSAR_peak_! | 10.83         | + |
| chr5 | 5187239 | 5187290 | CSAR_peak_! | 8.39          | + |
| chr5 | 5199910 | 5199958 | CSAR_peak_! | 12.13         | + |
| chr5 | 5200320 | 5200374 | CSAR_peak_! | 13.44         | + |
| chr5 | 5200722 | 5200766 | CSAR_peak_! | 6.21          | + |
| chr5 | 5206410 | 5206441 | CSAR_peak_! | 5.62          | + |
| chr5 | 5209978 | 5210047 | CSAR_peak_! | 18.1,14.92    | + |
| chr5 | 5210143 | 5210217 | CSAR_peak_! | 14.85,7.34,6. | + |
| chr5 | 5210223 | 5210292 | CSAR_peak_! | 20.18,10.53   | + |
| chr5 | 5210321 | 5210465 | CSAR_peak_! | 24.52,6.21,1  | + |
| chr5 | 5211937 | 5212040 | CSAR_peak_! | 35.61,29.8,1  | + |
| chr5 | 5212107 | 5212429 | CSAR_peak_! | 17.1,70,8.3,1 | + |
| chr5 | 5212437 | 5212475 | CSAR_peak_! | 10.95         | + |
| chr5 | 5212545 | 5212585 | CSAR_peak_! | 9.58          | + |
| chr5 | 5212622 | 5212640 | CSAR_peak_! | 6.21          | + |
| chr5 | 5212804 | 5212890 | CSAR_peak_! | 12.17,11.38   | + |
| chr5 | 5212980 | 5213021 | CSAR_peak_! | 6.21          | + |
| chr5 | 5213725 | 5213765 | CSAR_peak_! | 8.39          | + |
| chr5 | 5213840 | 5213994 | CSAR_peak_! | 13,7.27,6.44, | + |
| chr5 | 5214028 | 5214154 | CSAR_peak_! | 6.57          | + |

|      |         |         |             |               |   |
|------|---------|---------|-------------|---------------|---|
| chr5 | 5214203 | 5214267 | CSAR_peak_0 | 7.27          | + |
| chr5 | 5214278 | 5214334 | CSAR_peak_0 | 8.39          | + |
| chr5 | 5214514 | 5214572 | CSAR_peak_0 | 7.58          | + |
| chr5 | 5265996 | 5266072 | CSAR_peak_0 | 7.92          | + |
| chr5 | 5266675 | 5266708 | CSAR_peak_0 | 7.92          | + |
| chr5 | 5267420 | 5267440 | CSAR_peak_0 | 6.21          | + |
| chr5 | 5268996 | 5269057 | CSAR_peak_0 | 10.83,6.44    | + |
| chr5 | 5273506 | 5273555 | CSAR_peak_0 | 8.13          | + |
| chr5 | 5273729 | 5273774 | CSAR_peak_0 | 7.27          | + |
| chr5 | 5275626 | 5275661 | CSAR_peak_0 | 6.21          | + |
| chr5 | 5280880 | 5280930 | CSAR_peak_0 | 6.21          | + |
| chr5 | 5281960 | 5282052 | CSAR_peak_0 | 9.58          | + |
| chr5 | 5312070 | 5312113 | CSAR_peak_0 | 6.21          | + |
| chr5 | 5314996 | 5315067 | CSAR_peak_0 | 9.77,6.03     | + |
| chr5 | 5317290 | 5317333 | CSAR_peak_0 | 7.27          | + |
| chr5 | 5318566 | 5318633 | CSAR_peak_0 | 10.95         | + |
| chr5 | 5318975 | 5319090 | CSAR_peak_0 | 7.27          | + |
| chr5 | 5319447 | 5319533 | CSAR_peak_0 | 9.58,7.58     | + |
| chr5 | 5338490 | 5338546 | CSAR_peak_0 | 7.27          | + |
| chr5 | 5339221 | 5339283 | CSAR_peak_0 | 7.27          | + |
| chr5 | 5373142 | 5373209 | CSAR_peak_0 | 6.21          | + |
| chr5 | 5375127 | 5375180 | CSAR_peak_0 | 5.62,6.57     | + |
| chr5 | 5448634 | 5448678 | CSAR_peak_0 | 19.05,7.28    | + |
| chr5 | 5448688 | 5448770 | CSAR_peak_0 | 6.24,7.55,14. | + |
| chr5 | 5448884 | 5448975 | CSAR_peak_0 | 33.26,25.41,: | + |
| chr5 | 5449074 | 5449176 | CSAR_peak_0 | 87.82,12.63,: | + |
| chr5 | 5449242 | 5449317 | CSAR_peak_0 | 121.06,34.19  | + |
| chr5 | 5449464 | 5449533 | CSAR_peak_0 | 34.64,10.52,! | + |
| chr5 | 5458624 | 5458641 | CSAR_peak_0 | 6.57          | + |
| chr5 | 5458774 | 5458806 | CSAR_peak_0 | 7.27          | + |
| chr5 | 5459199 | 5459283 | CSAR_peak_0 | 9.58          | + |
| chr5 | 5490724 | 5490780 | CSAR_peak_0 | 6.21,7.58     | + |
| chr5 | 5497825 | 5497835 | CSAR_peak_0 | 7.27          | + |
| chr5 | 5497844 | 5497904 | CSAR_peak_0 | 13.44,6.44    | + |
| chr5 | 5498874 | 5498931 | CSAR_peak_0 | 9.58          | + |
| chr5 | 5499019 | 5499116 | CSAR_peak_0 | 6.57          | + |
| chr5 | 5499291 | 5499423 | CSAR_peak_0 | 16.33,6.03    | + |
| chr5 | 5499438 | 5499499 | CSAR_peak_0 | 11.14         | + |
| chr5 | 5500041 | 5500166 | CSAR_peak_0 | 8.39,6.12,12. | + |
| chr5 | 5532338 | 5532500 | CSAR_peak_0 | 16.33,23.49   | + |
| chr5 | 5537267 | 5537318 | CSAR_peak_0 | 10.02         | + |
| chr5 | 5537512 | 5537587 | CSAR_peak_0 | 10.83         | + |

|      |         |         |             |                   |   |
|------|---------|---------|-------------|-------------------|---|
| chr5 | 5549363 | 5549404 | CSAR_peak_! | 7.27              | + |
| chr5 | 5549655 | 5549691 | CSAR_peak_! | 6.57              | + |
| chr5 | 5549693 | 5549739 | CSAR_peak_! | 10.94             | + |
| chr5 | 5549798 | 5549923 | CSAR_peak_! | 7.58,10.95,10.94  | + |
| chr5 | 5550463 | 5550526 | CSAR_peak_! | 13.48             | + |
| chr5 | 5550946 | 5550990 | CSAR_peak_! | 6.21              | + |
| chr5 | 5551150 | 5551196 | CSAR_peak_! | 8.39              | + |
| chr5 | 5562138 | 5562207 | CSAR_peak_! | 9.27,9.58         | + |
| chr5 | 5562214 | 5562263 | CSAR_peak_! | 8.39              | + |
| chr5 | 5562290 | 5562503 | CSAR_peak_! | 7.36,6.45,13.48   | + |
| chr5 | 5562513 | 5562564 | CSAR_peak_! | 10.31,19.36,10.94 | + |
| chr5 | 5562842 | 5562893 | CSAR_peak_! | 8.39              | + |
| chr5 | 5563169 | 5563212 | CSAR_peak_! | 8.39              | + |
| chr5 | 5563232 | 5563249 | CSAR_peak_! | 6.21              | + |
| chr5 | 5563274 | 5563325 | CSAR_peak_! | 11.96,12.31       | + |
| chr5 | 5563361 | 5563415 | CSAR_peak_! | 12.13             | + |
| chr5 | 5563437 | 5563490 | CSAR_peak_! | 8.39,10.95        | + |
| chr5 | 5564350 | 5564402 | CSAR_peak_! | 8.39              | + |
| chr5 | 5595731 | 5595752 | CSAR_peak_! | 9.58              | + |
| chr5 | 5595793 | 5595824 | CSAR_peak_! | 6.1,6.02          | + |
| chr5 | 5596161 | 5596203 | CSAR_peak_! | 8.39              | + |
| chr5 | 5596701 | 5596750 | CSAR_peak_! | 11.14             | + |
| chr5 | 5596920 | 5596970 | CSAR_peak_! | 6.57,6.57         | + |
| chr5 | 5597548 | 5597602 | CSAR_peak_! | 6.21,7.27         | + |
| chr5 | 5597735 | 5597849 | CSAR_peak_! | 6.95,10.02,10.94  | + |
| chr5 | 5598650 | 5598663 | CSAR_peak_! | 8.28              | + |
| chr5 | 5599330 | 5599381 | CSAR_peak_! | 9.58,8.95         | + |
| chr5 | 5599676 | 5599742 | CSAR_peak_! | 7.34,6.21         | + |
| chr5 | 5599834 | 5599863 | CSAR_peak_! | 7.92              | + |
| chr5 | 5599921 | 5599933 | CSAR_peak_! | 6.21              | + |
| chr5 | 5600014 | 5600047 | CSAR_peak_! | 6.21              | + |
| chr5 | 5600049 | 5600095 | CSAR_peak_! | 7.92              | + |
| chr5 | 5600151 | 5600178 | CSAR_peak_! | 6.57              | + |
| chr5 | 5600817 | 5600853 | CSAR_peak_! | 7.27              | + |
| chr5 | 5600911 | 5600939 | CSAR_peak_! | 6.57,6.57         | + |
| chr5 | 5601095 | 5601133 | CSAR_peak_! | 8.39              | + |
| chr5 | 5601474 | 5601536 | CSAR_peak_! | 9.58              | + |
| chr5 | 5601751 | 5601804 | CSAR_peak_! | 8.39              | + |
| chr5 | 5711469 | 5711511 | CSAR_peak_! | 6.21              | + |
| chr5 | 5712957 | 5713029 | CSAR_peak_! | 8.39              | + |
| chr5 | 5713264 | 5713356 | CSAR_peak_! | 16.11,10.02,10.94 | + |
| chr5 | 5713420 | 5713435 | CSAR_peak_! | 6.57              | + |



|      |         |         |             |                   |   |
|------|---------|---------|-------------|-------------------|---|
| chr5 | 5751029 | 5751066 | CSAR_peak_! | 6.21              | + |
| chr5 | 5751297 | 5751333 | CSAR_peak_! | 6.21              | + |
| chr5 | 5752833 | 5752878 | CSAR_peak_! | 22.58,22.74       | + |
| chr5 | 5752963 | 5753007 | CSAR_peak_! | 20.13,21.35       | + |
| chr5 | 5753094 | 5753201 | CSAR_peak_! | 13.51             | + |
| chr5 | 5780385 | 5780426 | CSAR_peak_! | 5.62              | + |
| chr5 | 5780580 | 5780644 | CSAR_peak_! | 9.58,6.95         | + |
| chr5 | 5781197 | 5781238 | CSAR_peak_! | 6.21              | + |
| chr5 | 5781287 | 5781352 | CSAR_peak_! | 10.31,8.65        | + |
| chr5 | 5781979 | 5782005 | CSAR_peak_! | 6.21              | + |
| chr5 | 5899805 | 5899899 | CSAR_peak_! | 19.36,8.39        | + |
| chr5 | 5900061 | 5900156 | CSAR_peak_! | 6.21,8.39         | + |
| chr5 | 5900421 | 5900484 | CSAR_peak_! | 6.95              | + |
| chr5 | 5900603 | 5900669 | CSAR_peak_! | 7.92              | + |
| chr5 | 5900769 | 5900839 | CSAR_peak_! | 8.28,7.27         | + |
| chr5 | 5918859 | 5918891 | CSAR_peak_! | 6.95              | + |
| chr5 | 5920084 | 5920146 | CSAR_peak_! | 9.58              | + |
| chr5 | 5920953 | 5921006 | CSAR_peak_! | 8.39              | + |
| chr5 | 5922098 | 5922168 | CSAR_peak_! | 12.17,8.13        | + |
| chr5 | 5928225 | 5928326 | CSAR_peak_! | 13.51,8.65        | + |
| chr5 | 5928594 | 5928645 | CSAR_peak_! | 8.28              | + |
| chr5 | 5928826 | 5928897 | CSAR_peak_! | 8.65              | + |
| chr5 | 5931902 | 5931971 | CSAR_peak_! | 7.27,5.62         | + |
| chr5 | 5935756 | 5935810 | CSAR_peak_! | 8.13,7.73         | + |
| chr5 | 5936210 | 5936359 | CSAR_peak_! | 9.27,10.96,10.96  | + |
| chr5 | 5936361 | 5936558 | CSAR_peak_! | 31.2,20.13,10.96  | + |
| chr5 | 5936740 | 5936828 | CSAR_peak_! | 7.58,7.27,6.4     | + |
| chr5 | 5936890 | 5936940 | CSAR_peak_! | 6.21              | + |
| chr5 | 5936961 | 5937101 | CSAR_peak_! | 6.45,7.06         | + |
| chr5 | 5937116 | 5937208 | CSAR_peak_! | 8.5,9.97,7.29     | + |
| chr5 | 5937229 | 5937295 | CSAR_peak_! | 7.27,6.95         | + |
| chr5 | 5937346 | 5937524 | CSAR_peak_! | 10.83,10.32,10.32 | + |
| chr5 | 5937587 | 5937673 | CSAR_peak_! | 8.39,8.39         | + |
| chr5 | 5937717 | 5937745 | CSAR_peak_! | 7.27              | + |
| chr5 | 5937824 | 5937900 | CSAR_peak_! | 13.72,7.34,10.96  | + |
| chr5 | 5937987 | 5938082 | CSAR_peak_! | 12.52,12.92       | + |
| chr5 | 5938123 | 5938191 | CSAR_peak_! | 7.27,6.95         | + |
| chr5 | 5938418 | 5938452 | CSAR_peak_! | 7.92              | + |
| chr5 | 5938495 | 5938570 | CSAR_peak_! | 11.75,14.08       | + |
| chr5 | 5938645 | 5938729 | CSAR_peak_! | 10.35             | + |
| chr5 | 5938904 | 5938953 | CSAR_peak_! | 9.61              | + |
| chr5 | 5987886 | 5987967 | CSAR_peak_! | 29.2,7.27,14.08   | + |

|      |         |         |            |                   |   |
|------|---------|---------|------------|-------------------|---|
| chr5 | 5988251 | 5988298 | CSAR_peak_ | 7.06,6.03         | + |
| chr5 | 5988493 | 5988559 | CSAR_peak_ | 7.92,6.02         | + |
| chr5 | 6006224 | 6006265 | CSAR_peak_ | 6.57              | + |
| chr5 | 6006568 | 6006625 | CSAR_peak_ | 6.57              | + |
| chr5 | 6006697 | 6006747 | CSAR_peak_ | 10.94,6.57,10.94  | + |
| chr5 | 6007198 | 6007280 | CSAR_peak_ | 14.1,7.77         | + |
| chr5 | 6007287 | 6007325 | CSAR_peak_ | 7.58              | + |
| chr5 | 6007596 | 6007645 | CSAR_peak_ | 6.95              | + |
| chr5 | 6007882 | 6007969 | CSAR_peak_ | 14.88,7.92,6.95   | + |
| chr5 | 6008068 | 6008103 | CSAR_peak_ | 5.62              | + |
| chr5 | 6009427 | 6009468 | CSAR_peak_ | 8.39              | + |
| chr5 | 6035612 | 6035642 | CSAR_peak_ | 24.32             | + |
| chr5 | 6035699 | 6035741 | CSAR_peak_ | 11.45,33.6        | + |
| chr5 | 6035747 | 6035838 | CSAR_peak_ | 31.41,11.95,11.95 | + |
| chr5 | 6061719 | 6061779 | CSAR_peak_ | 6.44,6.45         | + |
| chr5 | 6062114 | 6062169 | CSAR_peak_ | 12.31,12.13       | + |
| chr5 | 6062457 | 6062545 | CSAR_peak_ | 18.65,10.33,10.33 | + |
| chr5 | 6062575 | 6062715 | CSAR_peak_ | 7.34,10.02        | + |
| chr5 | 6140025 | 6140060 | CSAR_peak_ | 6.95              | + |
| chr5 | 6140442 | 6140490 | CSAR_peak_ | 6.21              | + |
| chr5 | 6140715 | 6140754 | CSAR_peak_ | 7.27              | + |
| chr5 | 6141004 | 6141055 | CSAR_peak_ | 7.58,10.95        | + |
| chr5 | 6141170 | 6141242 | CSAR_peak_ | 14.76,6.21        | + |
| chr5 | 6177761 | 6177895 | CSAR_peak_ | 10.95,8.34,10.95  | + |
| chr5 | 6193580 | 6193639 | CSAR_peak_ | 7.34,16.11        | + |
| chr5 | 6194201 | 6194289 | CSAR_peak_ | 8.39              | + |
| chr5 | 6194740 | 6194799 | CSAR_peak_ | 13.44             | + |
| chr5 | 6195108 | 6195202 | CSAR_peak_ | 7.58              | + |
| chr5 | 6195266 | 6195335 | CSAR_peak_ | 10.02             | + |
| chr5 | 6195352 | 6195393 | CSAR_peak_ | 7.26              | + |
| chr5 | 6195456 | 6195546 | CSAR_peak_ | 6.21              | + |
| chr5 | 6202817 | 6202849 | CSAR_peak_ | 6.21              | + |
| chr5 | 6203415 | 6203496 | CSAR_peak_ | 6.12,8.28,8.5     | + |
| chr5 | 6203749 | 6203794 | CSAR_peak_ | 8.89,16.92,10.95  | + |
| chr5 | 6203883 | 6203914 | CSAR_peak_ | 5.71              | + |
| chr5 | 6204261 | 6204312 | CSAR_peak_ | 5.62              | + |
| chr5 | 6204975 | 6205029 | CSAR_peak_ | 27.94,8.95,10.95  | + |
| chr5 | 6205232 | 6205260 | CSAR_peak_ | 9.61              | + |
| chr5 | 6205266 | 6205330 | CSAR_peak_ | 12.74             | + |
| chr5 | 6205400 | 6205470 | CSAR_peak_ | 8.65              | + |
| chr5 | 6207025 | 6207095 | CSAR_peak_ | 7.27              | + |
| chr5 | 6213778 | 6213833 | CSAR_peak_ | 7.92,5.62         | + |

|      |         |         |             |               |   |
|------|---------|---------|-------------|---------------|---|
| chr5 | 6213937 | 6213985 | CSAR_peak_; | 13.44         | + |
| chr5 | 6214622 | 6214669 | CSAR_peak_! | 7.58          | + |
| chr5 | 6218647 | 6218744 | CSAR_peak_( | 7.27,10.18,9. | + |
| chr5 | 6218836 | 6218890 | CSAR_peak_( | 8.39          | + |
| chr5 | 6219285 | 6219317 | CSAR_peak_! | 7.58          | + |
| chr5 | 6219744 | 6219835 | CSAR_peak_( | 23.49,16.22   | + |
| chr5 | 6219927 | 6219987 | CSAR_peak_( | 14.88,6.57    | + |
| chr5 | 6220099 | 6220131 | CSAR_peak_( | 6.57          | + |
| chr5 | 6220249 | 6220295 | CSAR_peak_! | 17.82         | + |
| chr5 | 6220580 | 6220622 | CSAR_peak_! | 7.27          | + |
| chr5 | 6344335 | 6344366 | CSAR_peak_; | 6.44          | + |
| chr5 | 6370204 | 6370231 | CSAR_peak_! | 6.57          | + |
| chr5 | 6370494 | 6370528 | CSAR_peak_( | 9.58          | + |
| chr5 | 6370628 | 6370680 | CSAR_peak_! | 8.39          | + |
| chr5 | 6414824 | 6414954 | CSAR_peak_( | 8.39,6.85     | + |
| chr5 | 6415055 | 6415105 | CSAR_peak_( | 13.48         | + |
| chr5 | 6415139 | 6415208 | CSAR_peak_! | 8.92,18.73    | + |
| chr5 | 6415246 | 6415421 | CSAR_peak_! | 13.92,8.92,8. | + |
| chr5 | 6415486 | 6415514 | CSAR_peak_! | 7.34          | + |
| chr5 | 6415525 | 6415610 | CSAR_peak_; | 10.1,17.37    | + |
| chr5 | 6415635 | 6415756 | CSAR_peak_( | 6.57          | + |
| chr5 | 6416006 | 6416155 | CSAR_peak_( | 6.21,12.35    | + |
| chr5 | 6416407 | 6416657 | CSAR_peak_( | 13,14.88,11.! | + |
| chr5 | 6416658 | 6416683 | CSAR_peak_! | 8.39          | + |
| chr5 | 6417116 | 6417205 | CSAR_peak_( | 11.14,14.88   | + |
| chr5 | 6417240 | 6417328 | CSAR_peak_! | 12.13         | + |
| chr5 | 6423283 | 6423338 | CSAR_peak_! | 6.03          | + |
| chr5 | 6423525 | 6423592 | CSAR_peak_! | 7.27          | + |
| chr5 | 6424191 | 6424272 | CSAR_peak_( | 6.57,10.31    | + |
| chr5 | 6424423 | 6424461 | CSAR_peak_( | 8.39          | + |
| chr5 | 6425269 | 6425362 | CSAR_peak_! | 7.27,13.44,8. | + |
| chr5 | 6425399 | 6425464 | CSAR_peak_! | 7.2           | + |
| chr5 | 6425525 | 6425563 | CSAR_peak_( | 9.41          | + |
| chr5 | 6425599 | 6425626 | CSAR_peak_! | 9.72          | + |
| chr5 | 6425628 | 6425662 | CSAR_peak_; | 8.65          | + |
| chr5 | 6425716 | 6425777 | CSAR_peak_; | 21.94,6.95    | + |
| chr5 | 6426626 | 6426681 | CSAR_peak_! | 6.21          | + |
| chr5 | 6426705 | 6426782 | CSAR_peak_( | 9.31,12.94    | + |
| chr5 | 6426984 | 6427030 | CSAR_peak_( | 6.57          | + |
| chr5 | 6427228 | 6427345 | CSAR_peak_( | 8.39,6.57     | + |
| chr5 | 6427686 | 6427759 | CSAR_peak_( | 7.27          | + |
| chr5 | 6428534 | 6428553 | CSAR_peak_! | 10.83         | + |

|      |         |         |             |               |   |
|------|---------|---------|-------------|---------------|---|
| chr5 | 6431651 | 6431697 | CSAR_peak_  | 7.92          | + |
| chr5 | 6463090 | 6463130 | CSAR_peak_! | 8.39          | + |
| chr5 | 6467898 | 6467978 | CSAR_peak_! | 8.13          | + |
| chr5 | 6470521 | 6470612 | CSAR_peak_( | 13.66,6.57    | + |
| chr5 | 6470769 | 6470846 | CSAR_peak_( | 8.95,6.21     | + |
| chr5 | 6472376 | 6472442 | CSAR_peak_( | 8.39          | + |
| chr5 | 6532914 | 6532961 | CSAR_peak_( | 9.27          | + |
| chr5 | 6533898 | 6533975 | CSAR_peak_! | 7.58,6.37,9.0 | + |
| chr5 | 6535212 | 6535262 | CSAR_peak_! | 8.65          | + |
| chr5 | 6536584 | 6536668 | CSAR_peak_! | 6.03,5.62,10. | + |
| chr5 | 6536777 | 6536784 | CSAR_peak_! | 6.21          | + |
| chr5 | 6540815 | 6540864 | CSAR_peak_: | 6.03          | + |
| chr5 | 6541582 | 6541655 | CSAR_peak_! | 12.13         | + |
| chr5 | 6542253 | 6542327 | CSAR_peak_( | 7.27,10.95    | + |
| chr5 | 6542339 | 6542413 | CSAR_peak_! | 9.58          | + |
| chr5 | 6542581 | 6542662 | CSAR_peak_! | 8.39,6.57     | + |
| chr5 | 6544225 | 6544286 | CSAR_peak_: | 7.92,7.27     | + |
| chr5 | 6544362 | 6544394 | CSAR_peak_: | 7.34          | + |
| chr5 | 6544595 | 6544676 | CSAR_peak_! | 7.92,7.27     | + |
| chr5 | 6545570 | 6545626 | CSAR_peak_( | 6.21          | + |
| chr5 | 6572701 | 6572747 | CSAR_peak_: | 11.14         | + |
| chr5 | 6597398 | 6597445 | CSAR_peak_! | 7.34          | + |
| chr5 | 6653429 | 6653480 | CSAR_peak_! | 10.31         | + |
| chr5 | 6653566 | 6653627 | CSAR_peak_( | 6.21,7.58     | + |
| chr5 | 6654216 | 6654264 | CSAR_peak_( | 7.27          | + |
| chr5 | 6657731 | 6657798 | CSAR_peak_: | 12.17,10.02   | + |
| chr5 | 6657946 | 6657996 | CSAR_peak_! | 7.92,8.39     | + |
| chr5 | 6658095 | 6658154 | CSAR_peak_: | 10.02         | + |
| chr5 | 6658291 | 6658340 | CSAR_peak_( | 7.27          | + |
| chr5 | 6676508 | 6676563 | CSAR_peak_( | 10.83         | + |
| chr5 | 6687578 | 6687623 | CSAR_peak_( | 6.03,16.33    | + |
| chr5 | 6687700 | 6687732 | CSAR_peak_! | 11.14         | + |
| chr5 | 6688396 | 6688529 | CSAR_peak_( | 22.56,6.87,8. | + |
| chr5 | 6688783 | 6688920 | CSAR_peak_: | 6.65,16.05    | + |
| chr5 | 6740085 | 6740223 | CSAR_peak_! | 7.27,9.77     | + |
| chr5 | 6754640 | 6754670 | CSAR_peak_( | 8.39          | + |
| chr5 | 6760505 | 6760588 | CSAR_peak_( | 7.27,16.11    | + |
| chr5 | 6760797 | 6760881 | CSAR_peak_! | 12.31         | + |
| chr5 | 6761124 | 6761208 | CSAR_peak_! | 16.33,7.73    | + |
| chr5 | 6761495 | 6761552 | CSAR_peak_( | 9.58          | + |
| chr5 | 6761571 | 6761612 | CSAR_peak_( | 6.21          | + |
| chr5 | 6761652 | 6761701 | CSAR_peak_( | 9.27          | + |

|      |         |         |             |                |   |
|------|---------|---------|-------------|----------------|---|
| chr5 | 6762960 | 6763016 | CSAR_peak_! | 14.76          | + |
| chr5 | 6763356 | 6763418 | CSAR_peak_! | 13.44,8.95     | + |
| chr5 | 6763532 | 6763569 | CSAR_peak_! | 7.27           | + |
| chr5 | 6764124 | 6764174 | CSAR_peak_! | 6.21           | + |
| chr5 | 6798661 | 6798711 | CSAR_peak_! | 6.21           | + |
| chr5 | 6802408 | 6802445 | CSAR_peak_! | 7.27           | + |
| chr5 | 6802533 | 6802589 | CSAR_peak_! | 8.39           | + |
| chr5 | 6802660 | 6802726 | CSAR_peak_! | 9.77,13.51,7.  | + |
| chr5 | 6802765 | 6802815 | CSAR_peak_! | 9.4,5.92       | + |
| chr5 | 6802896 | 6802907 | CSAR_peak_! | 7.27           | + |
| chr5 | 6802947 | 6803053 | CSAR_peak_! | 10.95,10.02,:  | + |
| chr5 | 6803143 | 6803203 | CSAR_peak_! | 13.48          | + |
| chr5 | 6803480 | 6803524 | CSAR_peak_! | 6.21           | + |
| chr5 | 6814237 | 6814325 | CSAR_peak_! | 6.95,10.95     | + |
| chr5 | 6814562 | 6814607 | CSAR_peak_! | 7.27           | + |
| chr5 | 6814677 | 6814727 | CSAR_peak_! | 5.62           | + |
| chr5 | 6814817 | 6814933 | CSAR_peak_! | 15.1,8.28,19.  | + |
| chr5 | 6814959 | 6815107 | CSAR_peak_! | 17.51,9.03,7.  | + |
| chr5 | 6815535 | 6815574 | CSAR_peak_! | 7.27           | + |
| chr5 | 6820220 | 6820245 | CSAR_peak_! | 6.57           | + |
| chr5 | 6820256 | 6820295 | CSAR_peak_! | 6.45           | + |
| chr5 | 6820340 | 6820380 | CSAR_peak_! | 6.21           | + |
| chr5 | 6820725 | 6820804 | CSAR_peak_! | 9.58           | + |
| chr5 | 6821508 | 6821545 | CSAR_peak_! | 6.03           | + |
| chr5 | 6824465 | 6824520 | CSAR_peak_! | 8.95,6.03      | + |
| chr5 | 6826613 | 6826689 | CSAR_peak_! | 12.13          | + |
| chr5 | 6826750 | 6826828 | CSAR_peak_! | 15.64,8.53,1(+ | + |
| chr5 | 6826842 | 6826877 | CSAR_peak_! | 13.48          | + |
| chr5 | 6826914 | 6827024 | CSAR_peak_! | 27.23,20.13,:  | + |
| chr5 | 6827027 | 6827093 | CSAR_peak_! | 9.67,11.75     | + |
| chr5 | 6827115 | 6827173 | CSAR_peak_! | 6.96           | + |
| chr5 | 6827712 | 6827771 | CSAR_peak_! | 12.13,6.21     | + |
| chr5 | 6833725 | 6833761 | CSAR_peak_! | 6.21           | + |
| chr5 | 6833851 | 6833907 | CSAR_peak_! | 10.02,13.29,:  | + |
| chr5 | 6833929 | 6834203 | CSAR_peak_! | 31.77,48.39,:  | + |
| chr5 | 6834251 | 6834333 | CSAR_peak_! | 9.47,6.65      | + |
| chr5 | 6834398 | 6834520 | CSAR_peak_! | 10.77,7.43     | + |
| chr5 | 6834617 | 6834647 | CSAR_peak_! | 6.65           | + |
| chr5 | 6834661 | 6834689 | CSAR_peak_! | 7.36           | + |
| chr5 | 6834795 | 6834895 | CSAR_peak_! | 18.79,5.8      | + |
| chr5 | 6834930 | 6835204 | CSAR_peak_! | 6.22,8.21,22.  | + |
| chr5 | 6835206 | 6835316 | CSAR_peak_! | 34.56,20.97,!  | + |

|      |         |         |             |                |   |
|------|---------|---------|-------------|----------------|---|
| chr5 | 6835317 | 6835371 | CSAR_peak_  | 23.52,7.5      | + |
| chr5 | 6835479 | 6835537 | CSAR_peak_! | 6.21           | + |
| chr5 | 6835580 | 6835608 | CSAR_peak_! | 14.88          | + |
| chr5 | 6835683 | 6835721 | CSAR_peak_! | 8.39           | + |
| chr5 | 6835742 | 6835954 | CSAR_peak_; | 7.78,11.52,1:  | + |
| chr5 | 6836096 | 6836165 | CSAR_peak_! | 6.25,9.32      | + |
| chr5 | 6836349 | 6836439 | CSAR_peak_! | 12.54,8.15     | + |
| chr5 | 6836500 | 6836643 | CSAR_peak_! | 13.72,16.87    | + |
| chr5 | 6836695 | 6836728 | CSAR_peak_! | 6.21           | + |
| chr5 | 6836850 | 6836911 | CSAR_peak_! | 15             | + |
| chr5 | 6836976 | 6837083 | CSAR_peak_! | 12.13,16.33,(+ |   |
| chr5 | 6837228 | 6837329 | CSAR_peak_! | 7.58           | + |
| chr5 | 6837542 | 6837589 | CSAR_peak_! | 8.39           | + |
| chr5 | 6837625 | 6837706 | CSAR_peak_! | 8.65           | + |
| chr5 | 6877232 | 6877273 | CSAR_peak_; | 6.03           | + |
| chr5 | 6879574 | 6879614 | CSAR_peak_; | 12.31          | + |
| chr5 | 7015478 | 7015520 | CSAR_peak_; | 6.03           | + |
| chr5 | 7090912 | 7090918 | CSAR_peak_! | 6.21           | + |
| chr5 | 7090943 | 7091024 | CSAR_peak_; | 37.55,8.5,12.: | + |
| chr5 | 7091384 | 7091415 | CSAR_peak_! | 6.21           | + |
| chr5 | 7091583 | 7091670 | CSAR_peak_! | 7.92,8.39      | + |
| chr5 | 7118338 | 7118404 | CSAR_peak_! | 10.95          | + |
| chr5 | 7164929 | 7164982 | CSAR_peak_! | 8.65           | + |
| chr5 | 7165784 | 7165880 | CSAR_peak_; | 6.03,12.31,6.: | + |
| chr5 | 7165984 | 7166147 | CSAR_peak_; | 8.95,8.95,11.: | + |
| chr5 | 7166165 | 7166219 | CSAR_peak_; | 6.57           | + |
| chr5 | 7166362 | 7166414 | CSAR_peak_! | 7.27           | + |
| chr5 | 7166615 | 7166650 | CSAR_peak_! | 20.05          | + |
| chr5 | 7166760 | 7166868 | CSAR_peak_; | 8.95,27.58,3(+ |   |
| chr5 | 7166884 | 7166947 | CSAR_peak_! | 6.72,7.71      | + |
| chr5 | 7167005 | 7167176 | CSAR_peak_! | 13.48,9.61     | + |
| chr5 | 7168461 | 7168566 | CSAR_peak_! | 9.58           | + |
| chr5 | 7169255 | 7169345 | CSAR_peak_! | 7.27           | + |
| chr5 | 7173532 | 7173561 | CSAR_peak_! | 8.39           | + |
| chr5 | 7173596 | 7173655 | CSAR_peak_! | 22.74,7.92     | + |
| chr5 | 7173710 | 7173818 | CSAR_peak_! | 25.34,5.62,2:  | + |
| chr5 | 7173864 | 7173916 | CSAR_peak_! | 7.27           | + |
| chr5 | 7174464 | 7174514 | CSAR_peak_! | 6.57           | + |
| chr5 | 7175017 | 7175115 | CSAR_peak_! | 16.33          | + |
| chr5 | 7176440 | 7176484 | CSAR_peak_! | 7.58           | + |
| chr5 | 7177133 | 7177188 | CSAR_peak_! | 12.17          | + |
| chr5 | 7177480 | 7177534 | CSAR_peak_! | 13.48          | + |

|      |         |         |             |               |   |
|------|---------|---------|-------------|---------------|---|
| chr5 | 7207355 | 7207436 | CSAR_peak_  | 6.95,7.92,12. | + |
| chr5 | 7207557 | 7207616 | CSAR_peak_! | 9.13,15.28,8. | + |
| chr5 | 7207680 | 7207698 | CSAR_peak_  | 9.27          | + |
| chr5 | 7207774 | 7207843 | CSAR_peak_! | 12.31,5.79    | + |
| chr5 | 7207925 | 7207945 | CSAR_peak_! | 8.65          | + |
| chr5 | 7208170 | 7208220 | CSAR_peak_! | 6.21          | + |
| chr5 | 7208307 | 7208362 | CSAR_peak_! | 8.39          | + |
| chr5 | 7209082 | 7209148 | CSAR_peak_! | 7.27          | + |
| chr5 | 7209318 | 7209380 | CSAR_peak_  | 14.76,18.65   | + |
| chr5 | 7209388 | 7209418 | CSAR_peak_! | 9.58          | + |
| chr5 | 7209429 | 7209487 | CSAR_peak_  | 12.17         | + |
| chr5 | 7209580 | 7209608 | CSAR_peak_! | 8.39          | + |
| chr5 | 7209807 | 7209828 | CSAR_peak_! | 6.02          | + |
| chr5 | 7209962 | 7210034 | CSAR_peak_! | 6.21          | + |
| chr5 | 7210181 | 7210326 | CSAR_peak_! | 7.92,6.72,13. | + |
| chr5 | 7210421 | 7210502 | CSAR_peak_  | 13.32,11.41   | + |
| chr5 | 7210707 | 7210803 | CSAR_peak_! | 12.31,13.48   | + |
| chr5 | 7210829 | 7210955 | CSAR_peak_! | 9.97,8.65     | + |
| chr5 | 7211039 | 7211129 | CSAR_peak_! | 10.02,7.73,8. | + |
| chr5 | 7211595 | 7211653 | CSAR_peak_! | 10.95         | + |
| chr5 | 7211704 | 7211838 | CSAR_peak_! | 6.44,7.27,20. | + |
| chr5 | 7212557 | 7212782 | CSAR_peak_! | 8.39,10.31,1! | + |
| chr5 | 7212850 | 7212880 | CSAR_peak_  | 11.14         | + |
| chr5 | 7212947 | 7213099 | CSAR_peak_  | 9.41,6.45,6.4 | + |
| chr5 | 7213113 | 7213198 | CSAR_peak_! | 7.27,7.27     | + |
| chr5 | 7213253 | 7213305 | CSAR_peak_! | 13.44         | + |
| chr5 | 7213321 | 7213340 | CSAR_peak_! | 6.57          | + |
| chr5 | 7213392 | 7213436 | CSAR_peak_! | 6.21          | + |
| chr5 | 7213635 | 7213749 | CSAR_peak_! | 18.65,11.07   | + |
| chr5 | 7218556 | 7218591 | CSAR_peak_  | 6.57,16.33    | + |
| chr5 | 7218786 | 7218806 | CSAR_peak_! | 8.65          | + |
| chr5 | 7220582 | 7220632 | CSAR_peak_  | 8.95,8.65     | + |
| chr5 | 7243545 | 7243615 | CSAR_peak_  | 18.95         | + |
| chr5 | 7243885 | 7243927 | CSAR_peak_  | 7.29          | + |
| chr5 | 7244322 | 7244371 | CSAR_peak_! | 10.95         | + |
| chr5 | 7245617 | 7245686 | CSAR_peak_! | 7.27,10.83    | + |
| chr5 | 7246434 | 7246486 | CSAR_peak_  | 5.62          | + |
| chr5 | 7247033 | 7247136 | CSAR_peak_! | 10.83         | + |
| chr5 | 7247410 | 7247509 | CSAR_peak_! | 8.65          | + |
| chr5 | 7247648 | 7247687 | CSAR_peak_! | 6.21          | + |
| chr5 | 7248020 | 7248069 | CSAR_peak_! | 6.21          | + |
| chr5 | 7248110 | 7248174 | CSAR_peak_! | 10.7          | + |

|      |         |         |             |               |   |
|------|---------|---------|-------------|---------------|---|
| chr5 | 7273603 | 7273648 | CSAR_peak_! | 12.17         | + |
| chr5 | 7274848 | 7274898 | CSAR_peak_! | 23.41,13.29   | + |
| chr5 | 7275947 | 7276007 | CSAR_peak_! | 8.95,7.27     | + |
| chr5 | 7279229 | 7279294 | CSAR_peak_! | 10.02,13.48   | + |
| chr5 | 7302116 | 7302225 | CSAR_peak_! | 13.48         | + |
| chr5 | 7302321 | 7302365 | CSAR_peak_! | 6.22,5.62     | + |
| chr5 | 7302850 | 7302915 | CSAR_peak_! | 6.45,7.29,21. | + |
| chr5 | 7302940 | 7303137 | CSAR_peak_! | 20.43,8.65    | + |
| chr5 | 7529797 | 7529879 | CSAR_peak_! | 12.17         | + |
| chr5 | 7530050 | 7530076 | CSAR_peak_! | 9.58          | + |
| chr5 | 7530486 | 7530558 | CSAR_peak_! | 7.68,6.57,8.2 | + |
| chr5 | 7530693 | 7530764 | CSAR_peak_! | 13.48,8.28    | + |
| chr5 | 7530979 | 7531024 | CSAR_peak_! | 6.57          | + |
| chr5 | 7531508 | 7531557 | CSAR_peak_! | 12.31,25.62   | + |
| chr5 | 7531656 | 7531712 | CSAR_peak_! | 8.65          | + |
| chr5 | 7532038 | 7532089 | CSAR_peak_! | 34.13,11.14   | + |
| chr5 | 7532249 | 7532297 | CSAR_peak_! | 14.76,14.88   | + |
| chr5 | 7532384 | 7532420 | CSAR_peak_! | 8.95          | + |
| chr5 | 7532489 | 7532541 | CSAR_peak_! | 8.39          | + |
| chr5 | 7532606 | 7532718 | CSAR_peak_! | 8.65,6.57     | + |
| chr5 | 7532741 | 7532806 | CSAR_peak_! | 6.95          | + |
| chr5 | 7532890 | 7532979 | CSAR_peak_! | 12.13         | + |
| chr5 | 7535325 | 7535405 | CSAR_peak_! | 13.44         | + |
| chr5 | 7541749 | 7541854 | CSAR_peak_! | 6.95,5.62,10. | + |
| chr5 | 7541990 | 7542052 | CSAR_peak_! | 10.83         | + |
| chr5 | 7542972 | 7543027 | CSAR_peak_! | 21.56,13.48,( | + |
| chr5 | 7544609 | 7544643 | CSAR_peak_! | 6.21,6.21     | + |
| chr5 | 7544671 | 7544695 | CSAR_peak_! | 8.9           | + |
| chr5 | 7544891 | 7544953 | CSAR_peak_! | 8.39          | + |
| chr5 | 7544963 | 7544995 | CSAR_peak_! | 7.27          | + |
| chr5 | 7571925 | 7572030 | CSAR_peak_! | 6.21,7.27     | + |
| chr5 | 7572980 | 7573047 | CSAR_peak_! | 7.27          | + |
| chr5 | 7577414 | 7577436 | CSAR_peak_! | 6.21          | + |
| chr5 | 7610124 | 7610189 | CSAR_peak_! | 8.39          | + |
| chr5 | 7628025 | 7628069 | CSAR_peak_! | 8.65          | + |
| chr5 | 7629664 | 7629721 | CSAR_peak_! | 10.95,12.31   | + |
| chr5 | 7629807 | 7629848 | CSAR_peak_! | 5.62          | + |
| chr5 | 7630418 | 7630462 | CSAR_peak_! | 9.58,6.57     | + |
| chr5 | 7665095 | 7665245 | CSAR_peak_! | 21.27,23.82,( | + |
| chr5 | 7665308 | 7665414 | CSAR_peak_! | 10.91,42.76,( | + |
| chr5 | 7665531 | 7665591 | CSAR_peak_! | 9.79,12.74    | + |
| chr5 | 7665669 | 7665716 | CSAR_peak_! | 8.65,8.94     | + |



|      |         |         |                            |
|------|---------|---------|----------------------------|
| chr5 | 7665794 | 7665884 | CSAR_peak_(6.95,8.65,18.+  |
| chr5 | 7665964 | 7665995 | CSAR_peak_! 17.92 +        |
| chr5 | 7666037 | 7666141 | CSAR_peak_(6.95,6.53,12.+  |
| chr5 | 7666240 | 7666311 | CSAR_peak_! 7.8 +          |
| chr5 | 7666392 | 7666524 | CSAR_peak_! 18.17,6.14,9.+ |
| chr5 | 7666571 | 7666673 | CSAR_peak_! 22.73,6.72,2(+ |
| chr5 | 7666714 | 7666770 | CSAR_peak_! 13.76,16.19 +  |
| chr5 | 7666808 | 7666875 | CSAR_peak_(6.57,6.95,8.3+  |
| chr5 | 7666895 | 7666952 | CSAR_peak_( 6.03 +         |
| chr5 | 7681437 | 7681492 | CSAR_peak_! 9.58 +         |
| chr5 | 7681912 | 7681990 | CSAR_peak_! 8.65 +         |
| chr5 | 7703492 | 7703607 | CSAR_peak_! 9.79,15.64 +   |
| chr5 | 7704023 | 7704075 | CSAR_peak_! 8.39 +         |
| chr5 | 7704398 | 7704532 | CSAR_peak_(16.33,10.31,:+  |
| chr5 | 7705036 | 7705096 | CSAR_peak_! 13.48,10.18 +  |
| chr5 | 7705121 | 7705196 | CSAR_peak_! 5.92,6.96 +    |
| chr5 | 7705224 | 7705279 | CSAR_peak_( 10.31 +        |
| chr5 | 7705341 | 7705395 | CSAR_peak_( 9.58 +         |
| chr5 | 7705621 | 7705663 | CSAR_peak_! 8.39 +         |
| chr5 | 7705749 | 7705798 | CSAR_peak_! 13.48,6.57 +   |
| chr5 | 7705809 | 7705832 | CSAR_peak_! 6.31 +         |
| chr5 | 7706040 | 7706141 | CSAR_peak_(10.62,6.21,8.+  |
| chr5 | 7706373 | 7706411 | CSAR_peak_! 7.92 +         |
| chr5 | 7719075 | 7719206 | CSAR_peak_(8.39,10.31,5.+  |
| chr5 | 7719594 | 7719634 | CSAR_peak_! 14.76 +        |
| chr5 | 7719680 | 7719749 | CSAR_peak_! 16.11 +        |
| chr5 | 7719969 | 7720016 | CSAR_peak_! 7.68 +         |
| chr5 | 7720928 | 7720972 | CSAR_peak_( 7.58 +         |
| chr5 | 7721323 | 7721363 | CSAR_peak_( 12.13 +        |
| chr5 | 7721512 | 7721528 | CSAR_peak_( 10.95 +        |
| chr5 | 7758595 | 7758636 | CSAR_peak_! 8.39 +         |
| chr5 | 7759971 | 7760027 | CSAR_peak_! 7.27,6.03 +    |
| chr5 | 7763847 | 7763879 | CSAR_peak_! 6.87 +         |
| chr5 | 7764648 | 7764695 | CSAR_peak_! 7.27,6.03 +    |
| chr5 | 7764999 | 7765030 | CSAR_peak_( 6.21 +         |
| chr5 | 7765567 | 7765609 | CSAR_peak_! 7.27 +         |
| chr5 | 7773825 | 7773870 | CSAR_peak_( 6.21 +         |
| chr5 | 7786673 | 7786734 | CSAR_peak_! 10.95 +        |
| chr5 | 7787076 | 7787121 | CSAR_peak_! 6.21 +         |
| chr5 | 7787137 | 7787239 | CSAR_peak_! 9.61 +         |
| chr5 | 7787437 | 7787558 | CSAR_peak_! 7.34,7.27,6.0+ |
| chr5 | 7787808 | 7787866 | CSAR_peak_( 7.27 +         |

|      |         |         |             |                |   |
|------|---------|---------|-------------|----------------|---|
| chr5 | 7788644 | 7788709 | CSAR_peak_! | 9.58           | + |
| chr5 | 7789198 | 7789303 | CSAR_peak_! | 8.95,6.02,8.3  | + |
| chr5 | 7789927 | 7789972 | CSAR_peak_! | 6.21           | + |
| chr5 | 7791552 | 7791593 | CSAR_peak_! | 6.03           | + |
| chr5 | 7792093 | 7792136 | CSAR_peak_! | 6.21           | + |
| chr5 | 7811154 | 7811199 | CSAR_peak_! | 10.83          | + |
| chr5 | 7812629 | 7812665 | CSAR_peak_! | 12.6           | + |
| chr5 | 7812864 | 7812943 | CSAR_peak_! | 6.03           | + |
| chr5 | 7813033 | 7813072 | CSAR_peak_! | 5.95           | + |
| chr5 | 7813269 | 7813326 | CSAR_peak_! | 14.88          | + |
| chr5 | 7813492 | 7813630 | CSAR_peak_! | 9.72,11.14,8.  | + |
| chr5 | 7814496 | 7814570 | CSAR_peak_! | 16.33          | + |
| chr5 | 7913158 | 7913240 | CSAR_peak_! | 12.13          | + |
| chr5 | 7927266 | 7927366 | CSAR_peak_! | 7.58           | + |
| chr5 | 7927672 | 7927706 | CSAR_peak_! | 6.21           | + |
| chr5 | 7927847 | 7927882 | CSAR_peak_! | 10.02          | + |
| chr5 | 7928070 | 7928084 | CSAR_peak_! | 5.62,6.95      | + |
| chr5 | 7928893 | 7928953 | CSAR_peak_! | 19.36          | + |
| chr5 | 7938976 | 7939045 | CSAR_peak_! | 8.39,10.95     | + |
| chr5 | 7947048 | 7947083 | CSAR_peak_! | 6.21           | + |
| chr5 | 7947091 | 7947154 | CSAR_peak_! | 7.26,5.95      | + |
| chr5 | 7947363 | 7947458 | CSAR_peak_! | 7.27,16.11,11. | + |
| chr5 | 7947515 | 7947560 | CSAR_peak_! | 14.76          | + |
| chr5 | 7948441 | 7948518 | CSAR_peak_! | 6.57,7.27,7.3  | + |
| chr5 | 7948668 | 7948726 | CSAR_peak_! | 6.85,9.79,6.2  | + |
| chr5 | 7949207 | 7949255 | CSAR_peak_! | 16.33,7.92     | + |
| chr5 | 7949327 | 7949379 | CSAR_peak_! | 10.31,8.39     | + |
| chr5 | 7949936 | 7950004 | CSAR_peak_! | 7.73           | + |
| chr5 | 8031359 | 8031418 | CSAR_peak_! | 9.27           | + |
| chr5 | 8031434 | 8031483 | CSAR_peak_! | 20.94,10.62    | + |
| chr5 | 8031591 | 8031633 | CSAR_peak_! | 8.39           | + |
| chr5 | 8031669 | 8031754 | CSAR_peak_! | 6.95,10.18,7.  | + |
| chr5 | 8031763 | 8031805 | CSAR_peak_! | 13.48          | + |
| chr5 | 8031987 | 8032080 | CSAR_peak_! | 11.45,7.34     | + |
| chr5 | 8032634 | 8032699 | CSAR_peak_! | 25.07          | + |
| chr5 | 8032721 | 8032844 | CSAR_peak_! | 10.02          | + |
| chr5 | 8033522 | 8033580 | CSAR_peak_! | 6.57           | + |
| chr5 | 8033864 | 8033899 | CSAR_peak_! | 9.58           | + |
| chr5 | 8034054 | 8034119 | CSAR_peak_! | 9.27,6.57,13.  | + |
| chr5 | 8034256 | 8034322 | CSAR_peak_! | 7.73,6.02      | + |
| chr5 | 8035466 | 8035520 | CSAR_peak_! | 8.39           | + |
| chr5 | 8059766 | 8059804 | CSAR_peak_! | 8.39           | + |

|      |         |         |             |              |   |
|------|---------|---------|-------------|--------------|---|
| chr5 | 8267555 | 8267595 | CSAR_peak_! | 12.13        | + |
| chr5 | 8298460 | 8298544 | CSAR_peak_! | 7.27         | + |
| chr5 | 8302001 | 8302064 | CSAR_peak_! | 8.39         | + |
| chr5 | 8305501 | 8305553 | CSAR_peak_! | 8.39         | + |
| chr5 | 8307652 | 8307705 | CSAR_peak_! | 13.48,8.65   | + |
| chr5 | 8310641 | 8310672 | CSAR_peak_! | 8.39         | + |
| chr5 | 8311072 | 8311124 | CSAR_peak_! | 7.27         | + |
| chr5 | 8312674 | 8312731 | CSAR_peak_! | 8.39         | + |
| chr5 | 8325492 | 8325502 | CSAR_peak_! | 6.21         | + |
| chr5 | 8325585 | 8325639 | CSAR_peak_! | 6.95         | + |
| chr5 | 8349688 | 8349731 | CSAR_peak_! | 6.57         | + |
| chr5 | 8352173 | 8352233 | CSAR_peak_! | 7.27,6.03    | + |
| chr5 | 8352624 | 8352683 | CSAR_peak_! | 8.61,13.32   | + |
| chr5 | 8352793 | 8352811 | CSAR_peak_! | 8.39         | + |
| chr5 | 8365822 | 8366069 | CSAR_peak_! | 21,5.95,10.0 | + |
| chr5 | 8366073 | 8366197 | CSAR_peak_! | 9.77,7.58    | + |
| chr5 | 8366227 | 8366486 | CSAR_peak_! | 22.56,19.36, | + |
| chr5 | 8366547 | 8366933 | CSAR_peak_! | 23.69,12.13, | + |
| chr5 | 8366968 | 8367077 | CSAR_peak_! | 11.28,54.36, | + |
| chr5 | 8367087 | 8367168 | CSAR_peak_! | 6.37         | + |
| chr5 | 8367234 | 8367310 | CSAR_peak_! | 10.18        | + |
| chr5 | 8367544 | 8367773 | CSAR_peak_! | 27.94,5.62,2 | + |
| chr5 | 8367814 | 8367864 | CSAR_peak_! | 7.27         | + |
| chr5 | 8368224 | 8368325 | CSAR_peak_! | 6.21,10.83   | + |
| chr5 | 8368674 | 8368714 | CSAR_peak_! | 10.02        | + |
| chr5 | 8379133 | 8379162 | CSAR_peak_! | 8.39         | + |
| chr5 | 8379430 | 8379462 | CSAR_peak_! | 8.39         | + |
| chr5 | 8379466 | 8379556 | CSAR_peak_! | 6.57,8.39    | + |
| chr5 | 8379901 | 8379973 | CSAR_peak_! | 6.21,6.21    | + |
| chr5 | 8380095 | 8380147 | CSAR_peak_! | 7.27         | + |
| chr5 | 8380708 | 8380776 | CSAR_peak_! | 6.21,6.21    | + |
| chr5 | 8380928 | 8381020 | CSAR_peak_! | 8.39,19.36   | + |
| chr5 | 8382149 | 8382208 | CSAR_peak_! | 10.83        | + |
| chr5 | 8382799 | 8382850 | CSAR_peak_! | 8.39         | + |
| chr5 | 8382900 | 8382970 | CSAR_peak_! | 7.27,6.21    | + |
| chr5 | 8383059 | 8383140 | CSAR_peak_! | 7.34,7.92    | + |
| chr5 | 8428115 | 8428153 | CSAR_peak_! | 10.02        | + |
| chr5 | 8428404 | 8428466 | CSAR_peak_! | 6.21,6.57    | + |
| chr5 | 8428550 | 8428567 | CSAR_peak_! | 6.95         | + |
| chr5 | 8428613 | 8428795 | CSAR_peak_! | 18.65,14.88  | + |
| chr5 | 8428859 | 8428936 | CSAR_peak_! | 9.27,11.66   | + |
| chr5 | 8429093 | 8429135 | CSAR_peak_! | 8.39         | + |

|      |         |         |             |               |   |
|------|---------|---------|-------------|---------------|---|
| chr5 | 8429519 | 8429575 | CSAR_peak_  | 20.43,9.58    | + |
| chr5 | 8429680 | 8429774 | CSAR_peak_! | 16.33,16.33   | + |
| chr5 | 8429791 | 8429870 | CSAR_peak_! | 11.75,17.51,1 | + |
| chr5 | 8430051 | 8430070 | CSAR_peak_! | 10.95         | + |
| chr5 | 8430237 | 8430319 | CSAR_peak_! | 9.58          | + |
| chr5 | 8430331 | 8430432 | CSAR_peak_! | 9.72,10.57    | + |
| chr5 | 8431137 | 8431215 | CSAR_peak_! | 11.39         | + |
| chr5 | 8431275 | 8431325 | CSAR_peak_! | 6.21          | + |
| chr5 | 8448205 | 8448250 | CSAR_peak_! | 7.34          | + |
| chr5 | 8450731 | 8450781 | CSAR_peak_! | 9.58          | + |
| chr5 | 8515756 | 8515838 | CSAR_peak_! | 7.27,5.62,7.2 | + |
| chr5 | 8515952 | 8515997 | CSAR_peak_! | 10.02         | + |
| chr5 | 8590012 | 8590078 | CSAR_peak_! | 17.51,6.21    | + |
| chr5 | 8590084 | 8590184 | CSAR_peak_! | 8.18,8.95     | + |
| chr5 | 8590323 | 8590397 | CSAR_peak_! | 16.33,12.13   | + |
| chr5 | 8590748 | 8590800 | CSAR_peak_! | 17.52         | + |
| chr5 | 8591261 | 8591313 | CSAR_peak_! | 7.27          | + |
| chr5 | 8724145 | 8724237 | CSAR_peak_! | 11.14,7.92,6. | + |
| chr5 | 8737464 | 8737528 | CSAR_peak_! | 8.39          | + |
| chr5 | 8773878 | 8774072 | CSAR_peak_! | 17.82,6.57,1. | + |
| chr5 | 8774205 | 8774392 | CSAR_peak_! | 20.35,16.08   | + |
| chr5 | 8774441 | 8774461 | CSAR_peak_! | 7.27          | + |
| chr5 | 8774467 | 8774514 | CSAR_peak_! | 6.21          | + |
| chr5 | 8774580 | 8774702 | CSAR_peak_! | 23,7.36       | + |
| chr5 | 8774715 | 8774755 | CSAR_peak_! | 8.28          | + |
| chr5 | 8774795 | 8774892 | CSAR_peak_! | 21.56,14.63   | + |
| chr5 | 8774917 | 8775077 | CSAR_peak_! | 10.83,11.32   | + |
| chr5 | 8775174 | 8775328 | CSAR_peak_! | 8.89,24.01    | + |
| chr5 | 8775330 | 8775400 | CSAR_peak_! | 12.17         | + |
| chr5 | 8775502 | 8775577 | CSAR_peak_! | 9.97,10.31    | + |
| chr5 | 8864341 | 8864428 | CSAR_peak_! | 13.66,6.57    | + |
| chr5 | 8864452 | 8864685 | CSAR_peak_! | 10.83,6.21,8. | + |
| chr5 | 8864868 | 8864946 | CSAR_peak_! | 6.21,12.13    | + |
| chr5 | 8865472 | 8865516 | CSAR_peak_! | 7.58          | + |
| chr5 | 8886138 | 8886199 | CSAR_peak_! | 9.58          | + |
| chr5 | 8898056 | 8898162 | CSAR_peak_! | 10.83,8.39    | + |
| chr5 | 8898235 | 8898270 | CSAR_peak_! | 6.87          | + |
| chr5 | 8898305 | 8898358 | CSAR_peak_! | 7.7           | + |
| chr5 | 8898715 | 8898842 | CSAR_peak_! | 28.62,16.89,  | + |
| chr5 | 8898905 | 8898984 | CSAR_peak_! | 8.39,8.5,10.5 | + |
| chr5 | 8899115 | 8899179 | CSAR_peak_! | 18.95,9.66    | + |
| chr5 | 8899191 | 8899268 | CSAR_peak_! | 13.48,8.95    | + |

|      |         |         |                           |   |
|------|---------|---------|---------------------------|---|
| chr5 | 8899335 | 8899405 | CSAR_peak_(7.58,9.58      | + |
| chr5 | 8899467 | 8899545 | CSAR_peak_!7.27,10.44     | + |
| chr5 | 8899582 | 8899671 | CSAR_peak_!16.73,7.77     | + |
| chr5 | 8899746 | 8899760 | CSAR_peak_(12.94          | + |
| chr5 | 8899807 | 8899834 | CSAR_peak_(7.03           | + |
| chr5 | 8899937 | 8899992 | CSAR_peak_(7.06,6.74      | + |
| chr5 | 8900223 | 8900292 | CSAR_peak_!9.03           | + |
| chr5 | 8900472 | 8900487 | CSAR_peak_!6.14           | + |
| chr5 | 8900581 | 8900614 | CSAR_peak_!17.57          | + |
| chr5 | 8900753 | 8900799 | CSAR_peak_!10.83          | + |
| chr5 | 8901107 | 8901192 | CSAR_peak_(9.72           | + |
| chr5 | 8947425 | 8947503 | CSAR_peak_!7.27,7.68      | + |
| chr5 | 8947690 | 8947751 | CSAR_peak_!6.95           | + |
| chr5 | 8947989 | 8948212 | CSAR_peak_!9.77           | + |
| chr5 | 8948231 | 8948292 | CSAR_peak_!7.92           | + |
| chr5 | 8948301 | 8948451 | CSAR_peak_!13.44,17.35    | + |
| chr5 | 8948527 | 8948573 | CSAR_peak_!8.39,8.39      | + |
| chr5 | 8948648 | 8948692 | CSAR_peak_(8.39,8.92      | + |
| chr5 | 8948995 | 8949072 | CSAR_peak_(6.21           | + |
| chr5 | 8968376 | 8968425 | CSAR_peak_!6.21           | + |
| chr5 | 9096642 | 9096743 | CSAR_peak_(8.9,6.21       | + |
| chr5 | 9096858 | 9096922 | CSAR_peak_(7.58           | + |
| chr5 | 9097056 | 9097181 | CSAR_peak_(17.82,10.95,)+ |   |
| chr5 | 9097212 | 9097266 | CSAR_peak_!7.27           | + |
| chr5 | 9097342 | 9097383 | CSAR_peak_(10.83          | + |
| chr5 | 9097725 | 9097768 | CSAR_peak_!6.21           | + |
| chr5 | 9097806 | 9097852 | CSAR_peak_(8.39           | + |
| chr5 | 9098064 | 9098099 | CSAR_peak_!8.39           | + |
| chr5 | 9098195 | 9098296 | CSAR_peak_(17.51          | + |
| chr5 | 9098911 | 9098965 | CSAR_peak_!14             | + |
| chr5 | 9190651 | 9190673 | CSAR_peak_!6.57           | + |
| chr5 | 9190785 | 9190817 | CSAR_peak_!7.58           | + |
| chr5 | 9208853 | 9208985 | CSAR_peak_!6.95,8.92,8.3+ |   |
| chr5 | 9209035 | 9209047 | CSAR_peak_!6.21           | + |
| chr5 | 9209155 | 9209203 | CSAR_peak_!9.58,9.77      | + |
| chr5 | 9209258 | 9209301 | CSAR_peak_!9.61,7.58      | + |
| chr5 | 9209836 | 9209872 | CSAR_peak_!7.58           | + |
| chr5 | 9262363 | 9262426 | CSAR_peak_!9.58           | + |
| chr5 | 9306720 | 9306770 | CSAR_peak_(6.57           | + |
| chr5 | 9306805 | 9306876 | CSAR_peak_!6.57,6.03      | + |
| chr5 | 9375473 | 9375528 | CSAR_peak_!6.95           | + |
| chr5 | 9375701 | 9375759 | CSAR_peak_(6.21           | + |

|      |         |         |             |               |   |
|------|---------|---------|-------------|---------------|---|
| chr5 | 9375938 | 9376064 | CSAR_peak_  | 8.65,9.97     | + |
| chr5 | 9376189 | 9376250 | CSAR_peak_! | 9.58          | + |
| chr5 | 9378400 | 9378468 | CSAR_peak_  | 13.64,5.79    | + |
| chr5 | 9378535 | 9378578 | CSAR_peak_! | 8.65          | + |
| chr5 | 9378606 | 9378675 | CSAR_peak_  | 7.58          | + |
| chr5 | 9434285 | 9434334 | CSAR_peak_! | 14.76         | + |
| chr5 | 9435054 | 9435089 | CSAR_peak_! | 7.27          | + |
| chr5 | 9436343 | 9436399 | CSAR_peak_! | 7.58          | + |
| chr5 | 9438496 | 9438519 | CSAR_peak_! | 6.95          | + |
| chr5 | 9439283 | 9439334 | CSAR_peak_! | 7.58          | + |
| chr5 | 9439407 | 9439419 | CSAR_peak_! | 7.27          | + |
| chr5 | 9439981 | 9440057 | CSAR_peak_  | 11.96         | + |
| chr5 | 9556152 | 9556198 | CSAR_peak_! | 7.27          | + |
| chr5 | 9649056 | 9649085 | CSAR_peak_  | 6.03          | + |
| chr5 | 9649258 | 9649299 | CSAR_peak_  | 9.79          | + |
| chr5 | 9650492 | 9650535 | CSAR_peak_  | 11.57         | + |
| chr5 | 9651290 | 9651334 | CSAR_peak_  | 17.67         | + |
| chr5 | 9651645 | 9651732 | CSAR_peak_! | 10.92,17.37,: | + |
| chr5 | 9651897 | 9651943 | CSAR_peak_! | 6.21,5.67     | + |
| chr5 | 9652875 | 9652922 | CSAR_peak_  | 7.58          | + |
| chr5 | 9652945 | 9652986 | CSAR_peak_! | 6.21,9.77     | + |
| chr5 | 9653054 | 9653092 | CSAR_peak_! | 6.11          | + |
| chr5 | 9653220 | 9653274 | CSAR_peak_! | 8.39          | + |
| chr5 | 9653382 | 9653442 | CSAR_peak_! | 9.72          | + |
| chr5 | 9653591 | 9653658 | CSAR_peak_! | 6.03          | + |
| chr5 | 9654106 | 9654138 | CSAR_peak_! | 8.39          | + |
| chr5 | 9658611 | 9658678 | CSAR_peak_! | 16.33         | + |
| chr5 | 9660005 | 9660051 | CSAR_peak_! | 8.39          | + |
| chr5 | 9661450 | 9661504 | CSAR_peak_! | 14.88,9.58    | + |
| chr5 | 9661822 | 9661865 | CSAR_peak_! | 6.21          | + |
| chr5 | 9680520 | 9680567 | CSAR_peak_  | 6.95          | + |
| chr5 | 9681330 | 9681353 | CSAR_peak_! | 6.21          | + |
| chr5 | 9743165 | 9743228 | CSAR_peak_! | 8.39,8.39     | + |
| chr5 | 9744283 | 9744327 | CSAR_peak_! | 6.21          | + |
| chr5 | 9745767 | 9745877 | CSAR_peak_  | 7.58          | + |
| chr5 | 9745977 | 9746075 | CSAR_peak_! | 12.13,6.44,6. | + |
| chr5 | 9746389 | 9746430 | CSAR_peak_  | 10.31         | + |
| chr5 | 9816530 | 9816581 | CSAR_peak_  | 31.12,46.29   | + |
| chr5 | 9816598 | 9816669 | CSAR_peak_  | 80.06,21.32,: | + |
| chr5 | 9817060 | 9817148 | CSAR_peak_  | 11.14,6.57    | + |
| chr5 | 9820382 | 9820458 | CSAR_peak_! | 10.83         | + |
| chr5 | 9820940 | 9820987 | CSAR_peak_  | 10.95         | + |

|      |          |          |             |                |   |
|------|----------|----------|-------------|----------------|---|
| chr5 | 9821168  | 9821226  | CSAR_peak_! | 6.21           | + |
| chr5 | 9821346  | 9821402  | CSAR_peak_! | 12.17,5.62     | + |
| chr5 | 9821867  | 9821899  | CSAR_peak_! | 6.03           | + |
| chr5 | 9822196  | 9822251  | CSAR_peak_! | 7.92           | + |
| chr5 | 9822321  | 9822383  | CSAR_peak_! | 6.21           | + |
| chr5 | 9822549  | 9822608  | CSAR_peak_! | 10.33          | + |
| chr5 | 9830393  | 9830459  | CSAR_peak_! | 8.95,8.39      | + |
| chr5 | 9832675  | 9832725  | CSAR_peak_! | 24.82,22.71    | + |
| chr5 | 9832948  | 9833084  | CSAR_peak_! | 8.39,37.71,6.1 | + |
| chr5 | 9984851  | 9984922  | CSAR_peak_! | 9.27,6.57      | + |
| chr5 | 9985002  | 9985086  | CSAR_peak_! | 7.27,13.44,8.1 | + |
| chr5 | 9985150  | 9985209  | CSAR_peak_! | 6.52           | + |
| chr5 | 9985261  | 9985320  | CSAR_peak_! | 8.39           | + |
| chr5 | 9985516  | 9985560  | CSAR_peak_! | 9.61           | + |
| chr5 | 9985704  | 9985812  | CSAR_peak_! | 12.13          | + |
| chr5 | 9986011  | 9986055  | CSAR_peak_! | 6.95           | + |
| chr5 | 9986194  | 9986226  | CSAR_peak_! | 7.92           | + |
| chr5 | 9986297  | 9986352  | CSAR_peak_! | 7.58,8.95      | + |
| chr5 | 9986647  | 9986690  | CSAR_peak_! | 7.27           | + |
| chr5 | 9986852  | 9986951  | CSAR_peak_! | 10.02,7.73,6.1 | + |
| chr5 | 10006059 | 10006109 | CSAR_peak_! | 6.21           | + |
| chr5 | 10006424 | 10006487 | CSAR_peak_! | 7.27           | + |
| chr5 | 10009255 | 10009307 | CSAR_peak_! | 6.21           | + |
| chr5 | 10011782 | 10011815 | CSAR_peak_! | 5.62           | + |
| chr5 | 10011921 | 10011937 | CSAR_peak_! | 5.62           | + |
| chr5 | 10012099 | 10012126 | CSAR_peak_! | 8.39           | + |
| chr5 | 10012129 | 10012181 | CSAR_peak_! | 6.02           | + |
| chr5 | 10017340 | 10017407 | CSAR_peak_! | 6.21           | + |
| chr5 | 10302258 | 10302390 | CSAR_peak_! | 12.13,7.27,5.1 | + |
| chr5 | 10303238 | 10303308 | CSAR_peak_! | 5.62           | + |
| chr5 | 10323336 | 10323417 | CSAR_peak_! | 6.57           | + |
| chr5 | 10323427 | 10323470 | CSAR_peak_! | 7.27           | + |
| chr5 | 10323615 | 10323717 | CSAR_peak_! | 9.77,10.18,1.1 | + |
| chr5 | 10325943 | 10325985 | CSAR_peak_! | 7.34,10.62     | + |
| chr5 | 10326073 | 10326118 | CSAR_peak_! | 7.58           | + |
| chr5 | 10927693 | 10927755 | CSAR_peak_! | 17.82          | + |
| chr5 | 11184802 | 11184907 | CSAR_peak_! | 7.27,7.27,7.4  | + |
| chr5 | 11185359 | 11185404 | CSAR_peak_! | 7.09           | + |
| chr5 | 11186866 | 11186915 | CSAR_peak_! | 8.59,7.43      | + |
| chr5 | 11187360 | 11187414 | CSAR_peak_! | 9.1,9.68       | + |
| chr5 | 11187862 | 11187920 | CSAR_peak_! | 8.92,9.68      | + |
| chr5 | 11316721 | 11316762 | CSAR_peak_! | 29.19          | + |

|      |          |          |             |             |   |
|------|----------|----------|-------------|-------------|---|
| chr5 | 12077783 | 12077847 | CSAR_peak_! | 8.39        | + |
| chr5 | 12078092 | 12078195 | CSAR_peak_! | 8.28        | + |
| chr5 | 12079851 | 12079906 | CSAR_peak_! | 16.33       | + |
| chr5 | 12079963 | 12080053 | CSAR_peak_! | 6.21,12.13  | + |
| chr5 | 12080226 | 12080294 | CSAR_peak_! | 7.92,8.39   | + |
| chr5 | 12080356 | 12080369 | CSAR_peak_! | 7.27        | + |
| chr5 | 12080379 | 12080427 | CSAR_peak_! | 8.61,10.83  | + |
| chr5 | 12080504 | 12080586 | CSAR_peak_! | 11.14,8.09  | + |
| chr5 | 12080971 | 12080995 | CSAR_peak_! | 6.21        | + |
| chr5 | 12191026 | 12191072 | CSAR_peak_! | 9.58        | + |
| chr5 | 13105235 | 13105284 | CSAR_peak_! | 7.27        | + |
| chr5 | 13420415 | 13420457 | CSAR_peak_! | 12.27,17.35 | + |
| chr5 | 13420571 | 13420582 | CSAR_peak_! | 10.33       | + |
| chr5 | 13420656 | 13420669 | CSAR_peak_! | 6.57        | + |
| chr5 | 13420672 | 13420718 | CSAR_peak_! | 13.81,7.54  | + |
| chr5 | 13420820 | 13420871 | CSAR_peak_! | 16.19       | + |
| chr5 | 13421023 | 13421075 | CSAR_peak_! | 9.58        | + |
| chr5 | 13421412 | 13421506 | CSAR_peak_! | 10.95,21.94 | + |
| chr5 | 13421646 | 13421729 | CSAR_peak_! | 7.34,10.83  | + |
| chr5 | 13421959 | 13422022 | CSAR_peak_! | 12.31       | + |
| chr5 | 13422124 | 13422140 | CSAR_peak_! | 6.1         | + |
| chr5 | 13422221 | 13422263 | CSAR_peak_! | 16.13,9.86  | + |
| chr5 | 13422511 | 13422591 | CSAR_peak_! | 6.11,12.54  | + |
| chr5 | 13422675 | 13422737 | CSAR_peak_! | 10.92       | + |
| chr5 | 13423004 | 13423049 | CSAR_peak_! | 7.27,6.02   | + |
| chr5 | 13423128 | 13423162 | CSAR_peak_! | 13.48       | + |
| chr5 | 13423196 | 13423266 | CSAR_peak_! | 26.05,7.36  | + |
| chr5 | 13423340 | 13423378 | CSAR_peak_! | 11.45       | + |
| chr5 | 13424796 | 13424837 | CSAR_peak_! | 6.21        | + |
| chr5 | 13425139 | 13425193 | CSAR_peak_! | 6.85        | + |
| chr5 | 13425649 | 13425695 | CSAR_peak_! | 8.92        | + |
| chr5 | 13425960 | 13425989 | CSAR_peak_! | 6.21        | + |
| chr5 | 13426546 | 13426610 | CSAR_peak_! | 6.44,6.57   | + |
| chr5 | 13426943 | 13426974 | CSAR_peak_! | 7.58        | + |
| chr5 | 13429642 | 13429724 | CSAR_peak_! | 8.28,9.58   | + |
| chr5 | 13430158 | 13430196 | CSAR_peak_! | 9.58        | + |
| chr5 | 13430659 | 13430745 | CSAR_peak_! | 6.95,7.92   | + |
| chr5 | 13431155 | 13431215 | CSAR_peak_! | 6.95        | + |
| chr5 | 13431974 | 13432035 | CSAR_peak_! | 9.58,6.03   | + |
| chr5 | 13432163 | 13432212 | CSAR_peak_! | 7.34        | + |
| chr5 | 13432403 | 13432419 | CSAR_peak_! | 8.65,7.34   | + |
| chr5 | 13587095 | 13587148 | CSAR_peak_! | 6.57,8.39   | + |



|      |          |          |             |               |   |
|------|----------|----------|-------------|---------------|---|
| chr5 | 13587576 | 13587627 | CSAR_peak_  | 10.02         | + |
| chr5 | 13636424 | 13636464 | CSAR_peak_  | 6.03          | + |
| chr5 | 13763035 | 13763084 | CSAR_peak_  | 8.39          | + |
| chr5 | 13831440 | 13831508 | CSAR_peak_! | 9.27          | + |
| chr5 | 13831612 | 13831660 | CSAR_peak_  | 7.27          | + |
| chr5 | 13831973 | 13832008 | CSAR_peak_  | 7.27          | + |
| chr5 | 13832136 | 13832181 | CSAR_peak_  | 6.57          | + |
| chr5 | 13832271 | 13832317 | CSAR_peak_! | 6.21          | + |
| chr5 | 13832364 | 13832392 | CSAR_peak_! | 8.95          | + |
| chr5 | 13832473 | 13832533 | CSAR_peak_! | 7.73          | + |
| chr5 | 14128530 | 14128586 | CSAR_peak_  | 12.13         | + |
| chr5 | 14128872 | 14128918 | CSAR_peak_! | 7.27          | + |
| chr5 | 14131175 | 14131242 | CSAR_peak_  | 7.92          | + |
| chr5 | 14131327 | 14131368 | CSAR_peak_  | 5.62,8.39     | + |
| chr5 | 14131752 | 14131839 | CSAR_peak_  | 6.21          | + |
| chr5 | 14132612 | 14132661 | CSAR_peak_  | 18.95,9.77,9. | + |
| chr5 | 14132758 | 14132770 | CSAR_peak_! | 7.27          | + |
| chr5 | 14136382 | 14136425 | CSAR_peak_  | 6.21          | + |
| chr5 | 14274879 | 14274953 | CSAR_peak_! | 7.27,9.03     | + |
| chr5 | 14275985 | 14276012 | CSAR_peak_  | 6.21          | + |
| chr5 | 14303131 | 14303178 | CSAR_peak_! | 19.36         | + |
| chr5 | 14592214 | 14592271 | CSAR_peak_! | 6.21          | + |
| chr5 | 14651901 | 14651953 | CSAR_peak_  | 8.39          | + |
| chr5 | 14683699 | 14683766 | CSAR_peak_  | 18.73,7.92    | + |
| chr5 | 14685984 | 14686069 | CSAR_peak_! | 9.27          | + |
| chr5 | 14686270 | 14686315 | CSAR_peak_! | 8.39          | + |
| chr5 | 14898473 | 14898521 | CSAR_peak_  | 8.39          | + |
| chr5 | 14898600 | 14898654 | CSAR_peak_  | 14.85,7.58    | + |
| chr5 | 14979164 | 14979243 | CSAR_peak_  | 9.58          | + |
| chr5 | 14979698 | 14979743 | CSAR_peak_! | 6.95          | + |
| chr5 | 14980355 | 14980410 | CSAR_peak_! | 13.44         | + |
| chr5 | 14981111 | 14981227 | CSAR_peak_  | 10.02         | + |
| chr5 | 14992985 | 14993148 | CSAR_peak_! | 19.36,11.14,! | + |
| chr5 | 15067116 | 15067176 | CSAR_peak_  | 8.39          | + |
| chr5 | 15067429 | 15067453 | CSAR_peak_  | 6.21          | + |
| chr5 | 15067609 | 15067646 | CSAR_peak_  | 7.73,7.92     | + |
| chr5 | 15261633 | 15261692 | CSAR_peak_! | 9.77          | + |
| chr5 | 15263472 | 15263562 | CSAR_peak_! | 17.82         | + |
| chr5 | 15263587 | 15263625 | CSAR_peak_  | 6.21          | + |
| chr5 | 15264233 | 15264278 | CSAR_peak_! | 10.83         | + |
| chr5 | 15265178 | 15265211 | CSAR_peak_  | 6.57          | + |
| chr5 | 15410258 | 15410314 | CSAR_peak_! | 6.85          | + |

|      |          |          |             |               |   |
|------|----------|----------|-------------|---------------|---|
| chr5 | 15410319 | 15410364 | CSAR_peak_! | 6.57          | + |
| chr5 | 15410901 | 15410951 | CSAR_peak_! | 6.21          | + |
| chr5 | 15441894 | 15441944 | CSAR_peak_! | 6.95          | + |
| chr5 | 15442210 | 15442281 | CSAR_peak_! | 6.21          | + |
| chr5 | 15442809 | 15442866 | CSAR_peak_! | 6.22          | + |
| chr5 | 15457494 | 15457546 | CSAR_peak_! | 7.92          | + |
| chr5 | 15458357 | 15458405 | CSAR_peak_! | 7.92          | + |
| chr5 | 15489998 | 15490092 | CSAR_peak_! | 18.95,10.95   | + |
| chr5 | 15490203 | 15490227 | CSAR_peak_! | 6.57          | + |
| chr5 | 15490396 | 15490554 | CSAR_peak_! | 13.51,7.27    | + |
| chr5 | 15490614 | 15490673 | CSAR_peak_! | 8.39          | + |
| chr5 | 15501727 | 15501786 | CSAR_peak_! | 6.21,9.58     | + |
| chr5 | 15503333 | 15503369 | CSAR_peak_! | 6.03          | + |
| chr5 | 15553244 | 15553292 | CSAR_peak_! | 6.21          | + |
| chr5 | 15555418 | 15555471 | CSAR_peak_! | 10.83         | + |
| chr5 | 15555491 | 15555633 | CSAR_peak_! | 32.46,21.27,! | + |
| chr5 | 15555729 | 15555754 | CSAR_peak_! | 7.26          | + |
| chr5 | 15556152 | 15556187 | CSAR_peak_! | 6.21          | + |
| chr5 | 15557160 | 15557212 | CSAR_peak_! | 12.5,5.9      | + |
| chr5 | 15558407 | 15558505 | CSAR_peak_! | 21.94,6.45    | + |
| chr5 | 15560636 | 15560687 | CSAR_peak_! | 6.57          | + |
| chr5 | 15561577 | 15561689 | CSAR_peak_! | 10.02,7.58    | + |
| chr5 | 15561716 | 15561972 | CSAR_peak_! | 10.02,10.95,! | + |
| chr5 | 15562025 | 15562124 | CSAR_peak_! | 8.65,8.95     | + |
| chr5 | 15822025 | 15822085 | CSAR_peak_! | 7.34          | + |
| chr5 | 15822657 | 15822734 | CSAR_peak_! | 8.65,5.62     | + |
| chr5 | 15822896 | 15822992 | CSAR_peak_! | 12.31,8.13    | + |
| chr5 | 15823096 | 15823144 | CSAR_peak_! | 8.65          | + |
| chr5 | 15823454 | 15823537 | CSAR_peak_! | 7.27          | + |
| chr5 | 15844434 | 15844461 | CSAR_peak_! | 8.09          | + |
| chr5 | 15844463 | 15844557 | CSAR_peak_! | 6.52,6.45     | + |
| chr5 | 15844566 | 15844689 | CSAR_peak_! | 11.63,6.03    | + |
| chr5 | 15844710 | 15844837 | CSAR_peak_! | 12.5,18.95    | + |
| chr5 | 15844868 | 15845077 | CSAR_peak_! | 16.19,12.31,! | + |
| chr5 | 15845728 | 15845751 | CSAR_peak_! | 7.73          | + |
| chr5 | 15845797 | 15845836 | CSAR_peak_! | 7.27          | + |
| chr5 | 15852455 | 15852530 | CSAR_peak_! | 8.39          | + |
| chr5 | 15853155 | 15853274 | CSAR_peak_! | 9.77,9.27     | + |
| chr5 | 15853573 | 15853585 | CSAR_peak_! | 8.39          | + |
| chr5 | 15853663 | 15853804 | CSAR_peak_! | 9.79,21.53    | + |
| chr5 | 15879086 | 15879208 | CSAR_peak_! | 24.17,20.13,! | + |
| chr5 | 15879573 | 15879698 | CSAR_peak_! | 6.57,10.95,!  | + |

|      |          |          |             |               |   |
|------|----------|----------|-------------|---------------|---|
| chr5 | 15879837 | 15879882 | CSAR_peak_! | 8.65          | + |
| chr5 | 15880220 | 15880262 | CSAR_peak_! | 10.83         | + |
| chr5 | 15880375 | 15880460 | CSAR_peak_! | 7.27,14.88    | + |
| chr5 | 15880543 | 15880583 | CSAR_peak_! | 6.21          | + |
| chr5 | 15881064 | 15881120 | CSAR_peak_! | 6.21          | + |
| chr5 | 15902291 | 15902391 | CSAR_peak_! | 10.83,6.03,8. | + |
| chr5 | 15929229 | 15929297 | CSAR_peak_! | 6.21          | + |
| chr5 | 15929832 | 15929904 | CSAR_peak_! | 6.57          | + |
| chr5 | 15930320 | 15930379 | CSAR_peak_! | 7.27          | + |
| chr5 | 15931222 | 15931291 | CSAR_peak_! | 19.36,17.82   | + |
| chr5 | 15931789 | 15931821 | CSAR_peak_! | 7.58          | + |
| chr5 | 15931832 | 15931867 | CSAR_peak_! | 7.27          | + |
| chr5 | 15944271 | 15944319 | CSAR_peak_! | 6.95,6.57     | + |
| chr5 | 16162552 | 16162615 | CSAR_peak_! | 13.48,7.58    | + |
| chr5 | 16162966 | 16163100 | CSAR_peak_! | 17.82,8.95    | + |
| chr5 | 16163152 | 16163224 | CSAR_peak_! | 7.34          | + |
| chr5 | 16163326 | 16163394 | CSAR_peak_! | 6.57          | + |
| chr5 | 16163650 | 16163695 | CSAR_peak_! | 9.58,6.57     | + |
| chr5 | 16164002 | 16164054 | CSAR_peak_! | 14.88         | + |
| chr5 | 16164528 | 16164545 | CSAR_peak_! | 7.27          | + |
| chr5 | 16238741 | 16238812 | CSAR_peak_! | 9.58          | + |
| chr5 | 16368016 | 16368066 | CSAR_peak_! | 7.58          | + |
| chr5 | 16368196 | 16368244 | CSAR_peak_! | 8.95          | + |
| chr5 | 16375669 | 16375730 | CSAR_peak_! | 7.27,6.21     | + |
| chr5 | 16375840 | 16375878 | CSAR_peak_! | 8.65          | + |
| chr5 | 16376150 | 16376206 | CSAR_peak_! | 10.83,10.83   | + |
| chr5 | 16377238 | 16377279 | CSAR_peak_! | 5.62          | + |
| chr5 | 16378264 | 16378327 | CSAR_peak_! | 7.27,6.21     | + |
| chr5 | 16395569 | 16395640 | CSAR_peak_! | 6.57          | + |
| chr5 | 16395658 | 16395777 | CSAR_peak_! | 11.32,12.74   | + |
| chr5 | 16395844 | 16395974 | CSAR_peak_! | 19.96,14.34   | + |
| chr5 | 16396085 | 16396159 | CSAR_peak_! | 9.27,12.13    | + |
| chr5 | 16396205 | 16396259 | CSAR_peak_! | 8.39          | + |
| chr5 | 16396322 | 16396385 | CSAR_peak_! | 10.83,6.03    | + |
| chr5 | 16396415 | 16396643 | CSAR_peak_! | 13.6,7.73,9.3 | + |
| chr5 | 16396702 | 16396761 | CSAR_peak_! | 6.21,8.39     | + |
| chr5 | 16396823 | 16396907 | CSAR_peak_! | 7.92,9.77,10. | + |
| chr5 | 16396945 | 16397020 | CSAR_peak_! | 16.08,21.94   | + |
| chr5 | 16397091 | 16397170 | CSAR_peak_! | 29.36,9.25    | + |
| chr5 | 16397256 | 16397294 | CSAR_peak_! | 13.29         | + |
| chr5 | 16397461 | 16397535 | CSAR_peak_! | 6.37,8.13     | + |
| chr5 | 16397997 | 16398047 | CSAR_peak_! | 6.21          | + |

|      |          |          |                          |                |   |
|------|----------|----------|--------------------------|----------------|---|
| chr5 | 16398259 | 16398330 | CSAR_peak_!              | 8.39           | + |
| chr5 | 16398612 | 16398984 | CSAR_peak_(30.16,14.88,; | +              |   |
| chr5 | 16399326 | 16399362 | CSAR_peak_(              | 8.39           | + |
| chr5 | 16399829 | 16399921 | CSAR_peak_(14.88,7.26    | +              |   |
| chr5 | 16400105 | 16400141 | CSAR_peak_(              | 7.27           | + |
| chr5 | 16402233 | 16402316 | CSAR_peak_(8.95,8.39     | +              |   |
| chr5 | 16402865 | 16402928 | CSAR_peak_(6.57,6.95     | +              |   |
| chr5 | 16403259 | 16403392 | CSAR_peak_(              | 13.44          | + |
| chr5 | 16403394 | 16403471 | CSAR_peak_(              | 8.65           | + |
| chr5 | 16403849 | 16403933 | CSAR_peak_(7.27,8.39     | +              |   |
| chr5 | 16405113 | 16405134 | CSAR_peak_!              | 6.21           | + |
| chr5 | 16405235 | 16405283 | CSAR_peak_!              | 12.13,7.27     | + |
| chr5 | 16405376 | 16405430 | CSAR_peak_(              | 6.21           | + |
| chr5 | 16405565 | 16405624 | CSAR_peak_(8.39,6.57,12. | +              |   |
| chr5 | 16424358 | 16424394 | CSAR_peak_;              | 16.55,6.44     | + |
| chr5 | 16441844 | 16441928 | CSAR_peak_!              | 15.2,12.13     | + |
| chr5 | 16442167 | 16442229 | CSAR_peak_!              | 9.58,9.77      | + |
| chr5 | 16442259 | 16442309 | CSAR_peak_;              | 7.58,6.21      | + |
| chr5 | 16442430 | 16442491 | CSAR_peak_!              | 17.82          | + |
| chr5 | 16442511 | 16442557 | CSAR_peak_!              | 10.83          | + |
| chr5 | 16442606 | 16442630 | CSAR_peak_(              | 10.83          | + |
| chr5 | 16442718 | 16442831 | CSAR_peak_!              | 7.58,8.34      | + |
| chr5 | 16443090 | 16443177 | CSAR_peak_(19.36,14      | +              |   |
| chr5 | 16443220 | 16443382 | CSAR_peak_;              | 14.76,26.43,;  | + |
| chr5 | 16443430 | 16443482 | CSAR_peak_(              | 14.88          | + |
| chr5 | 16443533 | 16443606 | CSAR_peak_!              | 8.95,12.31,1(+ |   |
| chr5 | 16443607 | 16443667 | CSAR_peak_;              | 9.72           | + |
| chr5 | 16447504 | 16447546 | CSAR_peak_(              | 7.58           | + |
| chr5 | 16447903 | 16447910 | CSAR_peak_(              | 6.45           | + |
| chr5 | 16448675 | 16448705 | CSAR_peak_(              | 6.21           | + |
| chr5 | 16448995 | 16449073 | CSAR_peak_!              | 6.21,8.39      | + |
| chr5 | 16449370 | 16449479 | CSAR_peak_!              | 7.27,7.29      | + |
| chr5 | 16449599 | 16449641 | CSAR_peak_!              | 7.27           | + |
| chr5 | 16449774 | 16449866 | CSAR_peak_(10.02,6.03    | +              |   |
| chr5 | 16454053 | 16454091 | CSAR_peak_(              | 6.21           | + |
| chr5 | 16504274 | 16504382 | CSAR_peak_!              | 7.27,8.39      | + |
| chr5 | 16504721 | 16504822 | CSAR_peak_!              | 12.13          | + |
| chr5 | 16505027 | 16505077 | CSAR_peak_(              | 6.21           | + |
| chr5 | 16505484 | 16505513 | CSAR_peak_(              | 9.58           | + |
| chr5 | 16505715 | 16505879 | CSAR_peak_!              | 7.73,7.34,5.6+ |   |
| chr5 | 16506248 | 16506294 | CSAR_peak_;              | 15.23,8.65     | + |
| chr5 | 16506728 | 16506807 | CSAR_peak_(              | 7.27           | + |

|      |          |          |             |               |   |
|------|----------|----------|-------------|---------------|---|
| chr5 | 16552705 | 16552825 | CSAR_peak_  | 9.54,29.2     | + |
| chr5 | 16553146 | 16553213 | CSAR_peak_  | 8.39,7.58     | + |
| chr5 | 16553640 | 16553691 | CSAR_peak_! | 8.39          | + |
| chr5 | 16554043 | 16554087 | CSAR_peak_! | 8.39          | + |
| chr5 | 16554623 | 16554674 | CSAR_peak_! | 11.14,10.83   | + |
| chr5 | 16554778 | 16554821 | CSAR_peak_! | 5.62          | + |
| chr5 | 16554997 | 16555032 | CSAR_peak_! | 6.21          | + |
| chr5 | 16581868 | 16581914 | CSAR_peak_! | 12.13,8.39    | + |
| chr5 | 16583283 | 16583359 | CSAR_peak_! | 7.27          | + |
| chr5 | 16598781 | 16598912 | CSAR_peak_! | 113.89,7.7,14 | + |
| chr5 | 16636371 | 16636454 | CSAR_peak_! | 9.27,14.85    | + |
| chr5 | 16636626 | 16636677 | CSAR_peak_! | 16.11         | + |
| chr5 | 16636854 | 16636909 | CSAR_peak_! | 7.92,6.57     | + |
| chr5 | 16637166 | 16637205 | CSAR_peak_! | 5.62          | + |
| chr5 | 16637605 | 16637623 | CSAR_peak_! | 6.21          | + |
| chr5 | 16677151 | 16677189 | CSAR_peak_! | 8.39          | + |
| chr5 | 16690369 | 16690456 | CSAR_peak_! | 10.02         | + |
| chr5 | 16698785 | 16698834 | CSAR_peak_! | 7.27          | + |
| chr5 | 16719496 | 16719557 | CSAR_peak_! | 11.14         | + |
| chr5 | 16719921 | 16719996 | CSAR_peak_! | 6.21          | + |
| chr5 | 16720335 | 16720389 | CSAR_peak_! | 10.02         | + |
| chr5 | 16726617 | 16726681 | CSAR_peak_! | 6.57          | + |
| chr5 | 16727516 | 16727559 | CSAR_peak_! | 8.39          | + |
| chr5 | 16727599 | 16727624 | CSAR_peak_! | 9.58          | + |
| chr5 | 16727725 | 16727914 | CSAR_peak_! | 6.21,11.38,6. | + |
| chr5 | 16727963 | 16728117 | CSAR_peak_! | 7.92,8.13,12. | + |
| chr5 | 16728136 | 16728376 | CSAR_peak_! | 26.69,14.76,  | + |
| chr5 | 16728518 | 16728637 | CSAR_peak_! | 6.95,8.65     | + |
| chr5 | 16728806 | 16728906 | CSAR_peak_! | 6.44,6.02     | + |
| chr5 | 16729031 | 16729126 | CSAR_peak_! | 7.27,10.83    | + |
| chr5 | 16729202 | 16729297 | CSAR_peak_! | 13.48,6.57    | + |
| chr5 | 16729569 | 16729758 | CSAR_peak_! | 8.39,16.33,1. | + |
| chr5 | 16729799 | 16729908 | CSAR_peak_! | 10.83,6.1     | + |
| chr5 | 16729950 | 16730007 | CSAR_peak_! | 12.17,13.48   | + |
| chr5 | 16730076 | 16730121 | CSAR_peak_! | 7.27          | + |
| chr5 | 16730186 | 16730274 | CSAR_peak_! | 6.21,9.58     | + |
| chr5 | 16730310 | 16730364 | CSAR_peak_! | 7.27          | + |
| chr5 | 16730472 | 16730547 | CSAR_peak_! | 7.27          | + |
| chr5 | 16730582 | 16730651 | CSAR_peak_! | 14.88         | + |
| chr5 | 16730683 | 16730744 | CSAR_peak_! | 9.58          | + |
| chr5 | 16730780 | 16730862 | CSAR_peak_! | 8.39          | + |
| chr5 | 16731050 | 16731119 | CSAR_peak_! | 6.57,7.92     | + |

|      |          |          |             |               |   |
|------|----------|----------|-------------|---------------|---|
| chr5 | 16731121 | 16731191 | CSAR_peak_1 | 12.13         | + |
| chr5 | 16731244 | 16731418 | CSAR_peak_1 | 8.52,5.62,12. | + |
| chr5 | 16731463 | 16731501 | CSAR_peak_1 | 5.62          | + |
| chr5 | 16731547 | 16731678 | CSAR_peak_1 | 16.33,10.02   | + |
| chr5 | 16731705 | 16731766 | CSAR_peak_1 | 7.27          | + |
| chr5 | 16731773 | 16731910 | CSAR_peak_1 | 16.33,17.82   | + |
| chr5 | 16731957 | 16732095 | CSAR_peak_1 | 13.48,10.31   | + |
| chr5 | 16732186 | 16732343 | CSAR_peak_1 | 8.92,13.44,1. | + |
| chr5 | 16732378 | 16732412 | CSAR_peak_1 | 6.21          | + |
| chr5 | 16739592 | 16739642 | CSAR_peak_1 | 13.48         | + |
| chr5 | 16815719 | 16815829 | CSAR_peak_1 | 9.58          | + |
| chr5 | 16816078 | 16816127 | CSAR_peak_1 | 10.95         | + |
| chr5 | 16816164 | 16816236 | CSAR_peak_1 | 12.83,6.14    | + |
| chr5 | 16816245 | 16816360 | CSAR_peak_1 | 15.36,7.78,2. | + |
| chr5 | 16816366 | 16816596 | CSAR_peak_1 | 20.43,6.72,1. | + |
| chr5 | 16816688 | 16816807 | CSAR_peak_1 | 12.5,9.27     | + |
| chr5 | 16817211 | 16817250 | CSAR_peak_1 | 6.21,6.21     | + |
| chr5 | 16873871 | 16873914 | CSAR_peak_1 | 6.03          | + |
| chr5 | 16875093 | 16875145 | CSAR_peak_1 | 8.13          | + |
| chr5 | 16875422 | 16875473 | CSAR_peak_1 | 8.39          | + |
| chr5 | 16875607 | 16875641 | CSAR_peak_1 | 6.57          | + |
| chr5 | 16875746 | 16875795 | CSAR_peak_1 | 6.21          | + |
| chr5 | 16876260 | 16876300 | CSAR_peak_1 | 13.44,9.77,8. | + |
| chr5 | 16876421 | 16876454 | CSAR_peak_1 | 9.58,6.03,6.9 | + |
| chr5 | 16896336 | 16896379 | CSAR_peak_1 | 6.85,5.62     | + |
| chr5 | 16896613 | 16896697 | CSAR_peak_1 | 8.65          | + |
| chr5 | 16896829 | 16896894 | CSAR_peak_1 | 13.48,5.62    | + |
| chr5 | 16896925 | 16896982 | CSAR_peak_1 | 13.44,6.95    | + |
| chr5 | 16897027 | 16897061 | CSAR_peak_1 | 6.95          | + |
| chr5 | 16897343 | 16897397 | CSAR_peak_1 | 9.58          | + |
| chr5 | 16903698 | 16903737 | CSAR_peak_1 | 7.27          | + |
| chr5 | 16904485 | 16904552 | CSAR_peak_1 | 8.28          | + |
| chr5 | 16904911 | 16904968 | CSAR_peak_1 | 9.77          | + |
| chr5 | 16945640 | 16945691 | CSAR_peak_1 | 6.21          | + |
| chr5 | 16947094 | 16947134 | CSAR_peak_1 | 6.21          | + |
| chr5 | 16948486 | 16948522 | CSAR_peak_1 | 8.39          | + |
| chr5 | 16948705 | 16948766 | CSAR_peak_1 | 12.17,6.21    | + |
| chr5 | 16948822 | 16948914 | CSAR_peak_1 | 6.21          | + |
| chr5 | 16949956 | 16950013 | CSAR_peak_1 | 6.03          | + |
| chr5 | 16984555 | 16984591 | CSAR_peak_1 | 6.03          | + |
| chr5 | 17015727 | 17015765 | CSAR_peak_1 | 7.27          | + |
| chr5 | 17067505 | 17067591 | CSAR_peak_1 | 6.85,7.27     | + |

|      |          |          |             |               |   |
|------|----------|----------|-------------|---------------|---|
| chr5 | 17067677 | 17067729 | CSAR_peak_1 | 6.03          | + |
| chr5 | 17068707 | 17068744 | CSAR_peak_1 | 6.57          | + |
| chr5 | 17069313 | 17069389 | CSAR_peak_1 | 6.21,7.73     | + |
| chr5 | 17069488 | 17069573 | CSAR_peak_1 | 14.76,6.45    | + |
| chr5 | 17136494 | 17136543 | CSAR_peak_1 | 7.73,10.83    | + |
| chr5 | 17139693 | 17139736 | CSAR_peak_1 | 6.21          | + |
| chr5 | 17225442 | 17225571 | CSAR_peak_1 | 6.52,6.95,6.6 | + |
| chr5 | 17226217 | 17226285 | CSAR_peak_1 | 6.85,6.91     | + |
| chr5 | 17227350 | 17227439 | CSAR_peak_1 | 6.95,8.65     | + |
| chr5 | 17242828 | 17242859 | CSAR_peak_1 | 9.77,8.39     | + |
| chr5 | 17300937 | 17301009 | CSAR_peak_1 | 6.21,10.31    | + |
| chr5 | 17301363 | 17301412 | CSAR_peak_1 | 8.65          | + |
| chr5 | 17368995 | 17369058 | CSAR_peak_1 | 12.13         | + |
| chr5 | 17475021 | 17475157 | CSAR_peak_1 | 140.43,224.4  | + |
| chr5 | 17502420 | 17502466 | CSAR_peak_1 | 9.58          | + |
| chr5 | 17502866 | 17502930 | CSAR_peak_1 | 5.62,6.45     | + |
| chr5 | 17502931 | 17502978 | CSAR_peak_1 | 15.2,6.57     | + |
| chr5 | 17503272 | 17503381 | CSAR_peak_1 | 16.11,18.65   | + |
| chr5 | 17513107 | 17513138 | CSAR_peak_1 | 8.39          | + |
| chr5 | 17522582 | 17522752 | CSAR_peak_1 | 17.51,17.4    | + |
| chr5 | 17523372 | 17523780 | CSAR_peak_1 | 9.68,17.52,8. | + |
| chr5 | 17523790 | 17523870 | CSAR_peak_1 | 8.39          | + |
| chr5 | 17527482 | 17527595 | CSAR_peak_1 | 21.35,14.88   | + |
| chr5 | 17527645 | 17527704 | CSAR_peak_1 | 7.27,8.39     | + |
| chr5 | 17527894 | 17528072 | CSAR_peak_1 | 9.58,6.21     | + |
| chr5 | 17528162 | 17528236 | CSAR_peak_1 | 8.65          | + |
| chr5 | 17529287 | 17529345 | CSAR_peak_1 | 7.27          | + |
| chr5 | 17529716 | 17529786 | CSAR_peak_1 | 5.62          | + |
| chr5 | 17550471 | 17550521 | CSAR_peak_1 | 8.39          | + |
| chr5 | 17566109 | 17566187 | CSAR_peak_1 | 10.83,13.51   | + |
| chr5 | 17566270 | 17566335 | CSAR_peak_1 | 9.58          | + |
| chr5 | 17566506 | 17566537 | CSAR_peak_1 | 8.65          | + |
| chr5 | 17566759 | 17566825 | CSAR_peak_1 | 6.21          | + |
| chr5 | 17567992 | 17568087 | CSAR_peak_1 | 14.88,6.57    | + |
| chr5 | 17568416 | 17568470 | CSAR_peak_1 | 7.27          | + |
| chr5 | 17588136 | 17588168 | CSAR_peak_1 | 6.57          | + |
| chr5 | 17588207 | 17588264 | CSAR_peak_1 | 9.58          | + |
| chr5 | 17678152 | 17678199 | CSAR_peak_1 | 8.39          | + |
| chr5 | 17678335 | 17678378 | CSAR_peak_1 | 7.92          | + |
| chr5 | 17678767 | 17678828 | CSAR_peak_1 | 12.13,6.57    | + |
| chr5 | 17680260 | 17680327 | CSAR_peak_1 | 13.48         | + |
| chr5 | 17685835 | 17685913 | CSAR_peak_1 | 6.95          | + |

|      |          |          |             |               |   |
|------|----------|----------|-------------|---------------|---|
| chr5 | 17686074 | 17686127 | CSAR_peak_1 | 8.39          | + |
| chr5 | 17686130 | 17686170 | CSAR_peak_1 | 8.39,7.27     | + |
| chr5 | 17712749 | 17712819 | CSAR_peak_1 | 13.44         | + |
| chr5 | 17712835 | 17712864 | CSAR_peak_1 | 7.92          | + |
| chr5 | 17713085 | 17713194 | CSAR_peak_1 | 7.34,7.52     | + |
| chr5 | 17715163 | 17715250 | CSAR_peak_1 | 7.27,7.92,12. | + |
| chr5 | 17715337 | 17715348 | CSAR_peak_1 | 7.58          | + |
| chr5 | 17715607 | 17715656 | CSAR_peak_1 | 7.92          | + |
| chr5 | 17717146 | 17717224 | CSAR_peak_1 | 10.83         | + |
| chr5 | 17717646 | 17717692 | CSAR_peak_1 | 10.33,11.38   | + |
| chr5 | 17718253 | 17718268 | CSAR_peak_1 | 8.39          | + |
| chr5 | 17722838 | 17722871 | CSAR_peak_1 | 8.39          | + |
| chr5 | 17731518 | 17731558 | CSAR_peak_1 | 7.27          | + |
| chr5 | 17732820 | 17732893 | CSAR_peak_1 | 11.14         | + |
| chr5 | 17733289 | 17733325 | CSAR_peak_1 | 6.21          | + |
| chr5 | 17735497 | 17735539 | CSAR_peak_1 | 8.39          | + |
| chr5 | 17735656 | 17735694 | CSAR_peak_1 | 6.57          | + |
| chr5 | 17736213 | 17736260 | CSAR_peak_1 | 19.36         | + |
| chr5 | 17736922 | 17736970 | CSAR_peak_1 | 12.13,6.57    | + |
| chr5 | 17737059 | 17737077 | CSAR_peak_1 | 7.27          | + |
| chr5 | 17737529 | 17737585 | CSAR_peak_1 | 6.57          | + |
| chr5 | 17761657 | 17761702 | CSAR_peak_1 | 7.27          | + |
| chr5 | 17784365 | 17784430 | CSAR_peak_1 | 6.85,7.29     | + |
| chr5 | 17784524 | 17784614 | CSAR_peak_1 | 30.81,9.27,1. | + |
| chr5 | 17784695 | 17784708 | CSAR_peak_1 | 10.02         | + |
| chr5 | 17784816 | 17784860 | CSAR_peak_1 | 6.21          | + |
| chr5 | 17785037 | 17785074 | CSAR_peak_1 | 7.27          | + |
| chr5 | 17786016 | 17786068 | CSAR_peak_1 | 10.83         | + |
| chr5 | 17786454 | 17786533 | CSAR_peak_1 | 6.21          | + |
| chr5 | 17786575 | 17786725 | CSAR_peak_1 | 6.03,9.58     | + |
| chr5 | 17786914 | 17787008 | CSAR_peak_1 | 7.27          | + |
| chr5 | 17787454 | 17787495 | CSAR_peak_1 | 6.21          | + |
| chr5 | 17789373 | 17789435 | CSAR_peak_1 | 7.34,6.03     | + |
| chr5 | 17798733 | 17798788 | CSAR_peak_1 | 10.02         | + |
| chr5 | 17798835 | 17798882 | CSAR_peak_1 | 8.39          | + |
| chr5 | 17818159 | 17818208 | CSAR_peak_1 | 6.57          | + |
| chr5 | 17819313 | 17819365 | CSAR_peak_1 | 6.21          | + |
| chr5 | 17819562 | 17819585 | CSAR_peak_1 | 8.39          | + |
| chr5 | 17819657 | 17819703 | CSAR_peak_1 | 6.21,8.39     | + |
| chr5 | 17819747 | 17819824 | CSAR_peak_1 | 7.26          | + |
| chr5 | 17820791 | 17820831 | CSAR_peak_1 | 6.03          | + |
| chr5 | 17821140 | 17821190 | CSAR_peak_1 | 7.92          | + |



|      |          |          |             |               |   |
|------|----------|----------|-------------|---------------|---|
| chr5 | 17821434 | 17821466 | CSAR_peak_1 | 9.58          | + |
| chr5 | 17821555 | 17821585 | CSAR_peak_1 | 9.58          | + |
| chr5 | 17821885 | 17821939 | CSAR_peak_1 | 7.29,9.77     | + |
| chr5 | 17840028 | 17840074 | CSAR_peak_1 | 113.46,11.95  | + |
| chr5 | 17840219 | 17840306 | CSAR_peak_1 | 7.91,6.44,72. | + |
| chr5 | 18013613 | 18013673 | CSAR_peak_1 | 13.48         | + |
| chr5 | 18013691 | 18013741 | CSAR_peak_1 | 6.03,6.95     | + |
| chr5 | 18013817 | 18013862 | CSAR_peak_1 | 9.77,7.27     | + |
| chr5 | 18013947 | 18013957 | CSAR_peak_1 | 7.58          | + |
| chr5 | 18014003 | 18014070 | CSAR_peak_1 | 8.72,8.12     | + |
| chr5 | 18014891 | 18014918 | CSAR_peak_1 | 6.45          | + |
| chr5 | 18014973 | 18015059 | CSAR_peak_1 | 19.01,5.79    | + |
| chr5 | 18015600 | 18015643 | CSAR_peak_1 | 7.27          | + |
| chr5 | 18016268 | 18016308 | CSAR_peak_1 | 6.21          | + |
| chr5 | 18044819 | 18044848 | CSAR_peak_1 | 6.21          | + |
| chr5 | 18044930 | 18044948 | CSAR_peak_1 | 6.57          | + |
| chr5 | 18052701 | 18052737 | CSAR_peak_1 | 6.21          | + |
| chr5 | 18054250 | 18054291 | CSAR_peak_1 | 10.02         | + |
| chr5 | 18056301 | 18056394 | CSAR_peak_1 | 9.58,9.31,7.9 | + |
| chr5 | 18056909 | 18056956 | CSAR_peak_1 | 11.14,6.94    | + |
| chr5 | 18057797 | 18057847 | CSAR_peak_1 | 12.17         | + |
| chr5 | 18058243 | 18058330 | CSAR_peak_1 | 8.39          | + |
| chr5 | 18058472 | 18058511 | CSAR_peak_1 | 12.17         | + |
| chr5 | 18114990 | 18115039 | CSAR_peak_1 | 6.57          | + |
| chr5 | 18115084 | 18115130 | CSAR_peak_1 | 9.58,6.21     | + |
| chr5 | 18115215 | 18115233 | CSAR_peak_1 | 6.57,6.21     | + |
| chr5 | 18115530 | 18115587 | CSAR_peak_1 | 9.58          | + |
| chr5 | 18115702 | 18115762 | CSAR_peak_1 | 7.58          | + |
| chr5 | 18229621 | 18229668 | CSAR_peak_1 | 8.39          | + |
| chr5 | 18229722 | 18229843 | CSAR_peak_1 | 10.83         | + |
| chr5 | 18229908 | 18229976 | CSAR_peak_1 | 17.82         | + |
| chr5 | 18230045 | 18230120 | CSAR_peak_1 | 8.39          | + |
| chr5 | 18230132 | 18230224 | CSAR_peak_1 | 7.58,13.48    | + |
| chr5 | 18230252 | 18230337 | CSAR_peak_1 | 13.48         | + |
| chr5 | 18230366 | 18230393 | CSAR_peak_1 | 7.27          | + |
| chr5 | 18230442 | 18230731 | CSAR_peak_1 | 17.68,7.34,7. | + |
| chr5 | 18230759 | 18230822 | CSAR_peak_1 | 13.44,32.46   | + |
| chr5 | 18230923 | 18230988 | CSAR_peak_1 | 23,18.95,10.  | + |
| chr5 | 18231043 | 18231190 | CSAR_peak_1 | 7.78,18.61,6. | + |
| chr5 | 18231303 | 18231350 | CSAR_peak_1 | 6.21          | + |
| chr5 | 18231412 | 18231490 | CSAR_peak_1 | 8.39,10.31,7. | + |
| chr5 | 18231654 | 18231703 | CSAR_peak_1 | 10.83         | + |

|      |          |          |             |                |   |
|------|----------|----------|-------------|----------------|---|
| chr5 | 18231712 | 18231752 | CSAR_peak_1 | 6.21           | + |
| chr5 | 18244839 | 18244878 | CSAR_peak_1 | 5.62           | + |
| chr5 | 18245119 | 18245139 | CSAR_peak_1 | 8.39           | + |
| chr5 | 18245155 | 18245192 | CSAR_peak_1 | 6.21           | + |
| chr5 | 18245332 | 18245393 | CSAR_peak_1 | 8.53           | + |
| chr5 | 18326763 | 18326867 | CSAR_peak_1 | 25.91          | + |
| chr5 | 18330237 | 18330301 | CSAR_peak_1 | 9.77,13.48     | + |
| chr5 | 18346930 | 18346979 | CSAR_peak_1 | 10.02,9.77     | + |
| chr5 | 18346993 | 18347059 | CSAR_peak_1 | 12.5,6.87      | + |
| chr5 | 18347347 | 18347430 | CSAR_peak_1 | 7.58,19.83,2.1 | + |
| chr5 | 18347538 | 18347571 | CSAR_peak_1 | 13.84,14.63    | + |
| chr5 | 18347587 | 18347627 | CSAR_peak_1 | 9.77           | + |
| chr5 | 18347741 | 18347824 | CSAR_peak_1 | 6.21           | + |
| chr5 | 18348012 | 18348067 | CSAR_peak_1 | 25.65          | + |
| chr5 | 18348241 | 18348290 | CSAR_peak_1 | 13.48          | + |
| chr5 | 18348381 | 18348397 | CSAR_peak_1 | 7.27           | + |
| chr5 | 18348409 | 18348442 | CSAR_peak_1 | 11.14          | + |
| chr5 | 18348529 | 18348567 | CSAR_peak_1 | 7.27           | + |
| chr5 | 18348744 | 18348752 | CSAR_peak_1 | 6.21           | + |
| chr5 | 18348843 | 18348949 | CSAR_peak_1 | 20.43,7.27     | + |
| chr5 | 18349032 | 18349054 | CSAR_peak_1 | 6.21           | + |
| chr5 | 18349346 | 18349427 | CSAR_peak_1 | 10.83,7.68     | + |
| chr5 | 18397487 | 18397539 | CSAR_peak_1 | 7.27           | + |
| chr5 | 18407407 | 18407489 | CSAR_peak_1 | 5.79           | + |
| chr5 | 18407490 | 18407545 | CSAR_peak_1 | 21.51,14.9,1.4 | + |
| chr5 | 18407778 | 18407874 | CSAR_peak_1 | 6.21           | + |
| chr5 | 18408093 | 18408158 | CSAR_peak_1 | 27.64,7.7,6.0  | + |
| chr5 | 18408287 | 18408393 | CSAR_peak_1 | 17.82          | + |
| chr5 | 18408857 | 18408962 | CSAR_peak_1 | 12.94          | + |
| chr5 | 18409018 | 18409150 | CSAR_peak_1 | 8.39,6.57      | + |
| chr5 | 18409168 | 18409208 | CSAR_peak_1 | 10.99,5.97     | + |
| chr5 | 18409313 | 18409382 | CSAR_peak_1 | 22.68,16.34    | + |
| chr5 | 18409393 | 18409545 | CSAR_peak_1 | 7.27,25.85,7.1 | + |
| chr5 | 18409616 | 18409692 | CSAR_peak_1 | 8.3,13.84,8.3  | + |
| chr5 | 18409789 | 18409876 | CSAR_peak_1 | 10.02          | + |
| chr5 | 18409886 | 18409985 | CSAR_peak_1 | 7.34,14.76     | + |
| chr5 | 18410042 | 18410104 | CSAR_peak_1 | 20.94          | + |
| chr5 | 18410127 | 18410177 | CSAR_peak_1 | 17.82,12.13    | + |
| chr5 | 18410314 | 18410388 | CSAR_peak_1 | 26.55,12.31    | + |
| chr5 | 18410581 | 18410629 | CSAR_peak_1 | 8.95           | + |
| chr5 | 18410639 | 18410690 | CSAR_peak_1 | 8.65           | + |
| chr5 | 18410719 | 18410751 | CSAR_peak_1 | 11.14,7.29     | + |

|      |          |          |             |                 |   |
|------|----------|----------|-------------|-----------------|---|
| chr5 | 18411010 | 18411046 | CSAR_peak_1 | 8.39            | + |
| chr5 | 18411293 | 18411416 | CSAR_peak_1 | 18.55,12.54     | + |
| chr5 | 18411529 | 18411592 | CSAR_peak_1 | 16.95           | + |
| chr5 | 18411702 | 18411776 | CSAR_peak_1 | 6.95,13.48      | + |
| chr5 | 18412115 | 18412249 | CSAR_peak_1 | 19.36,12.17     | + |
| chr5 | 18431291 | 18431344 | CSAR_peak_1 | 7.27            | + |
| chr5 | 18445273 | 18445316 | CSAR_peak_1 | 6.1,6.12        | + |
| chr5 | 18445980 | 18446046 | CSAR_peak_1 | 11.38           | + |
| chr5 | 18446741 | 18446811 | CSAR_peak_1 | 8.39            | + |
| chr5 | 18467698 | 18467779 | CSAR_peak_1 | 7.92,16.08      | + |
| chr5 | 18468465 | 18468530 | CSAR_peak_1 | 10.83,7.27      | + |
| chr5 | 18469217 | 18469269 | CSAR_peak_1 | 6.21            | + |
| chr5 | 18559303 | 18559355 | CSAR_peak_1 | 16.33           | + |
| chr5 | 18559430 | 18559547 | CSAR_peak_1 | 16.33,12.17     | + |
| chr5 | 18559720 | 18559770 | CSAR_peak_1 | 12.13           | + |
| chr5 | 18560121 | 18560224 | CSAR_peak_1 | 8.92,13.44,1.1  | + |
| chr5 | 18560260 | 18560502 | CSAR_peak_1 | 34.93,17.87,1.1 | + |
| chr5 | 18560558 | 18560603 | CSAR_peak_1 | 7.27            | + |
| chr5 | 18561081 | 18561156 | CSAR_peak_1 | 9.58            | + |
| chr5 | 18561258 | 18561304 | CSAR_peak_1 | 8.39            | + |
| chr5 | 18561711 | 18561732 | CSAR_peak_1 | 6.57            | + |
| chr5 | 18561817 | 18561897 | CSAR_peak_1 | 9.61            | + |
| chr5 | 18561918 | 18561998 | CSAR_peak_1 | 8.39,6.57       | + |
| chr5 | 18562076 | 18562175 | CSAR_peak_1 | 8.39,16.05,9.1  | + |
| chr5 | 18562262 | 18562323 | CSAR_peak_1 | 6.95            | + |
| chr5 | 18562411 | 18562469 | CSAR_peak_1 | 6.44            | + |
| chr5 | 18687062 | 18687112 | CSAR_peak_1 | 8.65            | + |
| chr5 | 18697604 | 18697651 | CSAR_peak_1 | 8.28            | + |
| chr5 | 18697811 | 18697877 | CSAR_peak_1 | 6.21            | + |
| chr5 | 18698831 | 18698839 | CSAR_peak_1 | 6.21            | + |
| chr5 | 18699353 | 18699403 | CSAR_peak_1 | 11.14           | + |
| chr5 | 18699426 | 18699463 | CSAR_peak_1 | 6.57            | + |
| chr5 | 18699558 | 18699679 | CSAR_peak_1 | 7.73            | + |
| chr5 | 18699764 | 18699817 | CSAR_peak_1 | 10.83,8.13      | + |
| chr5 | 18699847 | 18699864 | CSAR_peak_1 | 10.02           | + |
| chr5 | 18699943 | 18699963 | CSAR_peak_1 | 6.37            | + |
| chr5 | 18757284 | 18757315 | CSAR_peak_1 | 6.57            | + |
| chr5 | 18757714 | 18757792 | CSAR_peak_1 | 7.27,7.92,8.6   | + |
| chr5 | 18787390 | 18787497 | CSAR_peak_1 | 194.09,188.7    | + |
| chr5 | 18792254 | 18792302 | CSAR_peak_1 | 8.39            | + |
| chr5 | 18794443 | 18794493 | CSAR_peak_1 | 8.39            | + |
| chr5 | 18795080 | 18795172 | CSAR_peak_1 | 12.13,8.39      | + |

|      |          |          |             |               |   |
|------|----------|----------|-------------|---------------|---|
| chr5 | 18795303 | 18795353 | CSAR_peak_1 | 8.39          | + |
| chr5 | 18817014 | 18817056 | CSAR_peak_1 | 6.21          | + |
| chr5 | 18826100 | 18826173 | CSAR_peak_1 | 7.73,8.28     | + |
| chr5 | 18826545 | 18826580 | CSAR_peak_1 | 6.95,9.27     | + |
| chr5 | 18826658 | 18826717 | CSAR_peak_1 | 10.83         | + |
| chr5 | 18826800 | 18826844 | CSAR_peak_1 | 10.83         | + |
| chr5 | 18827073 | 18827153 | CSAR_peak_1 | 6.57,8.95     | + |
| chr5 | 18827597 | 18827704 | CSAR_peak_1 | 6.57          | + |
| chr5 | 18828084 | 18828138 | CSAR_peak_1 | 7.27          | + |
| chr5 | 18828260 | 18828324 | CSAR_peak_1 | 9.58          | + |
| chr5 | 18830626 | 18830701 | CSAR_peak_1 | 9.58          | + |
| chr5 | 18830704 | 18830781 | CSAR_peak_1 | 6.95,6.21     | + |
| chr5 | 18831250 | 18831298 | CSAR_peak_1 | 9.77          | + |
| chr5 | 18831663 | 18831755 | CSAR_peak_1 | 11.38,7.51    | + |
| chr5 | 18832598 | 18832616 | CSAR_peak_1 | 6.21          | + |
| chr5 | 18832701 | 18832764 | CSAR_peak_1 | 9.58          | + |
| chr5 | 18833779 | 18833898 | CSAR_peak_1 | 72.27,85.77   | + |
| chr5 | 18836268 | 18836316 | CSAR_peak_1 | 10.83         | + |
| chr5 | 18836950 | 18837011 | CSAR_peak_1 | 7.27          | + |
| chr5 | 18837672 | 18837716 | CSAR_peak_1 | 8.39          | + |
| chr5 | 18839469 | 18839545 | CSAR_peak_1 | 6.57          | + |
| chr5 | 18839591 | 18839647 | CSAR_peak_1 | 6.21          | + |
| chr5 | 18840843 | 18840896 | CSAR_peak_1 | 9.58          | + |
| chr5 | 18843055 | 18843127 | CSAR_peak_1 | 14.88,8.39    | + |
| chr5 | 18843365 | 18843413 | CSAR_peak_1 | 7.34,13.48    | + |
| chr5 | 18844309 | 18844379 | CSAR_peak_1 | 9.58,12.13,6. | + |
| chr5 | 18844502 | 18844559 | CSAR_peak_1 | 8.39          | + |
| chr5 | 18844751 | 18844799 | CSAR_peak_1 | 6.21          | + |
| chr5 | 18845219 | 18845288 | CSAR_peak_1 | 13.44         | + |
| chr5 | 18845688 | 18845735 | CSAR_peak_1 | 12.13         | + |
| chr5 | 18846634 | 18846661 | CSAR_peak_1 | 8.52          | + |
| chr5 | 18846760 | 18846834 | CSAR_peak_1 | 6.54          | + |
| chr5 | 18847217 | 18847302 | CSAR_peak_1 | 11.63,8.5     | + |
| chr5 | 18847321 | 18847400 | CSAR_peak_1 | 9.79,25.07    | + |
| chr5 | 18848646 | 18848778 | CSAR_peak_1 | 8.39,12.13    | + |
| chr5 | 18848811 | 18848872 | CSAR_peak_1 | 10.83         | + |
| chr5 | 18849269 | 18849320 | CSAR_peak_1 | 7.27          | + |
| chr5 | 18849774 | 18849981 | CSAR_peak_1 | 7.27,14.76,8. | + |
| chr5 | 18850139 | 18850168 | CSAR_peak_1 | 6.21          | + |
| chr5 | 18851221 | 18851304 | CSAR_peak_1 | 9.58          | + |
| chr5 | 18851454 | 18851530 | CSAR_peak_1 | 8.39          | + |
| chr5 | 18852107 | 18852211 | CSAR_peak_1 | 25.91         | + |

|      |          |          |            |                |   |
|------|----------|----------|------------|----------------|---|
| chr5 | 18852966 | 18853045 | CSAR_peak_ | 9.41,6.95      | + |
| chr5 | 18857258 | 18857340 | CSAR_peak_ | 14.76,17.82,(+ |   |
| chr5 | 18857570 | 18857648 | CSAR_peak_ | 5.62           | + |
| chr5 | 18857687 | 18857737 | CSAR_peak_ | 10.02          | + |
| chr5 | 18857743 | 18857778 | CSAR_peak_ | 8.39           | + |
| chr5 | 18865104 | 18865213 | CSAR_peak_ | 5.62,8.95      | + |
| chr5 | 18865248 | 18865301 | CSAR_peak_ | 6.95           | + |
| chr5 | 18866231 | 18866364 | CSAR_peak_ | 35.25,15.35,(+ |   |
| chr5 | 18922743 | 18922785 | CSAR_peak_ | 7.34           | + |
| chr5 | 18922787 | 18922827 | CSAR_peak_ | 7.29           | + |
| chr5 | 18923157 | 18923180 | CSAR_peak_ | 9.58           | + |
| chr5 | 18975377 | 18975429 | CSAR_peak_ | 6.95,7.58      | + |
| chr5 | 18975970 | 18976037 | CSAR_peak_ | 10.83          | + |
| chr5 | 19073106 | 19073232 | CSAR_peak_ | 12.13,6.52     | + |
| chr5 | 19073665 | 19073708 | CSAR_peak_ | 6.21           | + |
| chr5 | 19074012 | 19074118 | CSAR_peak_ | 7.27,8.65      | + |
| chr5 | 19074943 | 19074992 | CSAR_peak_ | 7.27           | + |
| chr5 | 19075706 | 19075764 | CSAR_peak_ | 6.03           | + |
| chr5 | 19076817 | 19076881 | CSAR_peak_ | 9.58           | + |
| chr5 | 19076906 | 19076936 | CSAR_peak_ | 11.14          | + |
| chr5 | 19077238 | 19077262 | CSAR_peak_ | 6.21           | + |
| chr5 | 19078473 | 19078509 | CSAR_peak_ | 6.21           | + |
| chr5 | 19082694 | 19082774 | CSAR_peak_ | 21.94,8.95     | + |
| chr5 | 19083434 | 19083473 | CSAR_peak_ | 5.62           | + |
| chr5 | 19084110 | 19084160 | CSAR_peak_ | 7.27           | + |
| chr5 | 19085186 | 19085228 | CSAR_peak_ | 9.58           | + |
| chr5 | 19085256 | 19085287 | CSAR_peak_ | 7.26           | + |
| chr5 | 19085480 | 19085549 | CSAR_peak_ | 11.14,13.92    | + |
| chr5 | 19085575 | 19085649 | CSAR_peak_ | 6.57           | + |
| chr5 | 19086494 | 19086529 | CSAR_peak_ | 7.58           | + |
| chr5 | 19086751 | 19086803 | CSAR_peak_ | 7.27           | + |
| chr5 | 19087899 | 19087934 | CSAR_peak_ | 7.34           | + |
| chr5 | 19087984 | 19088082 | CSAR_peak_ | 20.13,19.36    | + |
| chr5 | 19088320 | 19088376 | CSAR_peak_ | 10.95          | + |
| chr5 | 19089199 | 19089235 | CSAR_peak_ | 6.21           | + |
| chr5 | 19107042 | 19107083 | CSAR_peak_ | 6.21           | + |
| chr5 | 19107410 | 19107464 | CSAR_peak_ | 6.57           | + |
| chr5 | 19117578 | 19117687 | CSAR_peak_ | 14.88          | + |
| chr5 | 19136051 | 19136265 | CSAR_peak_ | 12.31,7.73,6.+ |   |
| chr5 | 19136413 | 19136457 | CSAR_peak_ | 6.57           | + |
| chr5 | 19136496 | 19136552 | CSAR_peak_ | 7.27,5.62,6.4+ |   |
| chr5 | 19136635 | 19136752 | CSAR_peak_ | 16.33,6.03     | + |

|      |          |          |                           |
|------|----------|----------|---------------------------|
| chr5 | 19136813 | 19136916 | CSAR_peak_(6.03,14.85,9.+ |
| chr5 | 19137016 | 19137085 | CSAR_peak_(20.13,7.68 +   |
| chr5 | 19137134 | 19137222 | CSAR_peak_(9.03,8.53 +    |
| chr5 | 19137225 | 19137315 | CSAR_peak_(6.03,6.21,5.6+ |
| chr5 | 19137328 | 19137551 | CSAR_peak_(8.43,13.37,2:+ |
| chr5 | 19137714 | 19137763 | CSAR_peak_(7.27 +         |
| chr5 | 19166950 | 19167043 | CSAR_peak_(13.44 +        |
| chr5 | 19168029 | 19168082 | CSAR_peak_(10.95 +        |
| chr5 | 19168205 | 19168266 | CSAR_peak_(9.77 +         |
| chr5 | 19184006 | 19184090 | CSAR_peak_(8.13,8.19 +    |
| chr5 | 19184229 | 19184246 | CSAR_peak_(6.21 +         |
| chr5 | 19184404 | 19184451 | CSAR_peak_(8.65,7.27 +    |
| chr5 | 19184542 | 19184565 | CSAR_peak_(6.21 +         |
| chr5 | 19184792 | 19184934 | CSAR_peak_(8.39,23.49,1:+ |
| chr5 | 19185135 | 19185153 | CSAR_peak_(5.62 +         |
| chr5 | 19185177 | 19185247 | CSAR_peak_(14.76 +        |
| chr5 | 19202528 | 19202616 | CSAR_peak_(6.21,8.39 +    |
| chr5 | 19227259 | 19227284 | CSAR_peak_(8.39 +         |
| chr5 | 19227424 | 19227485 | CSAR_peak_(7.92,9.77,16.+ |
| chr5 | 19228047 | 19228126 | CSAR_peak_(13.6,9.31 +    |
| chr5 | 19228266 | 19228322 | CSAR_peak_(7.27 +         |
| chr5 | 19229984 | 19230038 | CSAR_peak_(7.27 +         |
| chr5 | 19231095 | 19231144 | CSAR_peak_(7.27 +         |
| chr5 | 19232289 | 19232356 | CSAR_peak_(10.95,7.27 +   |
| chr5 | 19232370 | 19232440 | CSAR_peak_(9.03,9.77 +    |
| chr5 | 19233665 | 19233767 | CSAR_peak_(10.02,6.57,6.+ |
| chr5 | 19234032 | 19234080 | CSAR_peak_(8.39,6.95 +    |
| chr5 | 19234715 | 19234768 | CSAR_peak_(16.11,6.21 +   |
| chr5 | 19257602 | 19257650 | CSAR_peak_(7.27 +         |
| chr5 | 19257929 | 19257975 | CSAR_peak_(9.58 +         |
| chr5 | 19258016 | 19258060 | CSAR_peak_(8.39 +         |
| chr5 | 19260219 | 19260287 | CSAR_peak_(6.57 +         |
| chr5 | 19260476 | 19260548 | CSAR_peak_(8.95 +         |
| chr5 | 19261315 | 19261382 | CSAR_peak_(7.27 +         |
| chr5 | 19261901 | 19261961 | CSAR_peak_(7.34 +         |
| chr5 | 19262169 | 19262257 | CSAR_peak_(13.44,14.88 +  |
| chr5 | 19262317 | 19262350 | CSAR_peak_(5.62 +         |
| chr5 | 19262783 | 19262816 | CSAR_peak_(8.39 +         |
| chr5 | 19262857 | 19262877 | CSAR_peak_(6.21 +         |
| chr5 | 19262906 | 19262945 | CSAR_peak_(8.39 +         |
| chr5 | 19263080 | 19263131 | CSAR_peak_(6.21 +         |
| chr5 | 19265213 | 19265251 | CSAR_peak_(6.57 +         |

|      |          |          |             |               |   |
|------|----------|----------|-------------|---------------|---|
| chr5 | 19267751 | 19267806 | CSAR_peak_1 | 6.57          | + |
| chr5 | 19321602 | 19321650 | CSAR_peak_1 | 6.21          | + |
| chr5 | 19321844 | 19321879 | CSAR_peak_1 | 6.45          | + |
| chr5 | 19321897 | 19321946 | CSAR_peak_1 | 9.61          | + |
| chr5 | 19323582 | 19323624 | CSAR_peak_1 | 7.27          | + |
| chr5 | 19324637 | 19324707 | CSAR_peak_1 | 13.48,6.02    | + |
| chr5 | 19325269 | 19325312 | CSAR_peak_1 | 6.21,7.58     | + |
| chr5 | 19325419 | 19325487 | CSAR_peak_1 | 6.21          | + |
| chr5 | 19325740 | 19325756 | CSAR_peak_1 | 6.21          | + |
| chr5 | 19325905 | 19325932 | CSAR_peak_1 | 6.21          | + |
| chr5 | 19326048 | 19326078 | CSAR_peak_1 | 8.39,8.39     | + |
| chr5 | 19326215 | 19326226 | CSAR_peak_1 | 12.13         | + |
| chr5 | 19326316 | 19326363 | CSAR_peak_1 | 9.58          | + |
| chr5 | 19326800 | 19326868 | CSAR_peak_1 | 8.52,10.92    | + |
| chr5 | 19327067 | 19327127 | CSAR_peak_1 | 8.39          | + |
| chr5 | 19332588 | 19332628 | CSAR_peak_1 | 7.27          | + |
| chr5 | 19332691 | 19332721 | CSAR_peak_1 | 7.58,7.27     | + |
| chr5 | 19333032 | 19333045 | CSAR_peak_1 | 6.57          | + |
| chr5 | 19333174 | 19333224 | CSAR_peak_1 | 11.99         | + |
| chr5 | 19333827 | 19333844 | CSAR_peak_1 | 7.34          | + |
| chr5 | 19334112 | 19334160 | CSAR_peak_1 | 6.95,7.34     | + |
| chr5 | 19346833 | 19346878 | CSAR_peak_1 | 8.39          | + |
| chr5 | 19347028 | 19347051 | CSAR_peak_1 | 12.13         | + |
| chr5 | 19347129 | 19347160 | CSAR_peak_1 | 7.34          | + |
| chr5 | 19348165 | 19348221 | CSAR_peak_1 | 8.39,7.29,14. | + |
| chr5 | 19349009 | 19349066 | CSAR_peak_1 | 6.03          | + |
| chr5 | 19349148 | 19349205 | CSAR_peak_1 | 10.83         | + |
| chr5 | 19350073 | 19350152 | CSAR_peak_1 | 8.09,11.83    | + |
| chr5 | 19350230 | 19350276 | CSAR_peak_1 | 12.98,7.11    | + |
| chr5 | 19351260 | 19351313 | CSAR_peak_1 | 6.21          | + |
| chr5 | 19352130 | 19352264 | CSAR_peak_1 | 8.28,5.62,9.5 | + |
| chr5 | 19366577 | 19366622 | CSAR_peak_1 | 7.27          | + |
| chr5 | 19368058 | 19368127 | CSAR_peak_1 | 8.39,5.62     | + |
| chr5 | 19368232 | 19368315 | CSAR_peak_1 | 6.95          | + |
| chr5 | 19368398 | 19368435 | CSAR_peak_1 | 10.83         | + |
| chr5 | 19368545 | 19368637 | CSAR_peak_1 | 19.36,6.21    | + |
| chr5 | 19368734 | 19368845 | CSAR_peak_1 | 13.48,8.39    | + |
| chr5 | 19368911 | 19368926 | CSAR_peak_1 | 8.39          | + |
| chr5 | 19369009 | 19369037 | CSAR_peak_1 | 7.27          | + |
| chr5 | 19369119 | 19369173 | CSAR_peak_1 | 7.92          | + |
| chr5 | 19369357 | 19369390 | CSAR_peak_1 | 7.92          | + |
| chr5 | 19369504 | 19369603 | CSAR_peak_1 | 7.58,7.92,10. | + |

|      |          |          |             |                 |   |
|------|----------|----------|-------------|-----------------|---|
| chr5 | 19369691 | 19369743 | CSAR_peak_1 | 6.64            | + |
| chr5 | 19369770 | 19369916 | CSAR_peak_1 | 19.36,9.41      | + |
| chr5 | 19370041 | 19370122 | CSAR_peak_1 | 6.02,26.64,11.1 | + |
| chr5 | 19370225 | 19370273 | CSAR_peak_1 | 6.03,10.31      | + |
| chr5 | 19370849 | 19370943 | CSAR_peak_1 | 6.21            | + |
| chr5 | 19371056 | 19371145 | CSAR_peak_1 | 10.02,7.27      | + |
| chr5 | 19398305 | 19398334 | CSAR_peak_1 | 6.45            | + |
| chr5 | 19399097 | 19399112 | CSAR_peak_1 | 7.27            | + |
| chr5 | 19399664 | 19399804 | CSAR_peak_1 | 6.03,12.13,8.1  | + |
| chr5 | 19400580 | 19400614 | CSAR_peak_1 | 8.39            | + |
| chr5 | 19400747 | 19400807 | CSAR_peak_1 | 7.36            | + |
| chr5 | 19401166 | 19401320 | CSAR_peak_1 | 8.65,12.17      | + |
| chr5 | 19401323 | 19401406 | CSAR_peak_1 | 7.58            | + |
| chr5 | 19401500 | 19401543 | CSAR_peak_1 | 7.27            | + |
| chr5 | 19435658 | 19435740 | CSAR_peak_1 | 12.17           | + |
| chr5 | 19436055 | 19436086 | CSAR_peak_1 | 8.39            | + |
| chr5 | 19457152 | 19457196 | CSAR_peak_1 | 6.21,7.92       | + |
| chr5 | 19457939 | 19457994 | CSAR_peak_1 | 8.39            | + |
| chr5 | 19458422 | 19458482 | CSAR_peak_1 | 16.54,8.92      | + |
| chr5 | 19459327 | 19459426 | CSAR_peak_1 | 8.39,5.62,6.8   | + |
| chr5 | 19459730 | 19459786 | CSAR_peak_1 | 13.48,11.38,7.1 | + |
| chr5 | 19459896 | 19459967 | CSAR_peak_1 | 7.27            | + |
| chr5 | 19460512 | 19460559 | CSAR_peak_1 | 6.03,5.9,7.34   | + |
| chr5 | 19460636 | 19460690 | CSAR_peak_1 | 11.28           | + |
| chr5 | 19460743 | 19460789 | CSAR_peak_1 | 8.39            | + |
| chr5 | 19550557 | 19550618 | CSAR_peak_1 | 8.65            | + |
| chr5 | 19609287 | 19609375 | CSAR_peak_1 | 6.95,8.44,16.1  | + |
| chr5 | 19609460 | 19609475 | CSAR_peak_1 | 7.68            | + |
| chr5 | 19609685 | 19609764 | CSAR_peak_1 | 10.95           | + |
| chr5 | 19610430 | 19610532 | CSAR_peak_1 | 9.58            | + |
| chr5 | 19611265 | 19611477 | CSAR_peak_1 | 16.33,8.52      | + |
| chr5 | 19611494 | 19611553 | CSAR_peak_1 | 6.21            | + |
| chr5 | 19611719 | 19611761 | CSAR_peak_1 | 8.39            | + |
| chr5 | 19615154 | 19615219 | CSAR_peak_1 | 7.58            | + |
| chr5 | 19615244 | 19615294 | CSAR_peak_1 | 6.21            | + |
| chr5 | 19624549 | 19624649 | CSAR_peak_1 | 25.46,62.69     | + |
| chr5 | 19624668 | 19624690 | CSAR_peak_1 | 12.09           | + |
| chr5 | 19624733 | 19624817 | CSAR_peak_1 | 117.04,147.9    | + |
| chr5 | 19624855 | 19624872 | CSAR_peak_1 | 27.87           | + |
| chr5 | 19676215 | 19676263 | CSAR_peak_1 | 6.21            | + |
| chr5 | 19676365 | 19676418 | CSAR_peak_1 | 6.21            | + |
| chr5 | 19714026 | 19714184 | CSAR_peak_1 | 10.83,6.03,8.1  | + |



|      |          |          |            |               |   |
|------|----------|----------|------------|---------------|---|
| chr5 | 19717340 | 19717556 | CSAR_peak_ | 7.27,7.27,9.5 | + |
| chr5 | 19717729 | 19717785 | CSAR_peak_ | 6.21          | + |
| chr5 | 19718237 | 19718283 | CSAR_peak_ | 10.83         | + |
| chr5 | 19719230 | 19719291 | CSAR_peak_ | 6.57          | + |
| chr5 | 19719509 | 19719641 | CSAR_peak_ | 16.33,6.21    | + |
| chr5 | 19720662 | 19720697 | CSAR_peak_ | 7.58          | + |
| chr5 | 20052119 | 20052181 | CSAR_peak_ | 16.33,6.21    | + |
| chr5 | 20052384 | 20052452 | CSAR_peak_ | 14.88         | + |
| chr5 | 20065267 | 20065306 | CSAR_peak_ | 6.21          | + |
| chr5 | 20066131 | 20066175 | CSAR_peak_ | 8.28          | + |
| chr5 | 20070797 | 20070851 | CSAR_peak_ | 10.95         | + |
| chr5 | 20070874 | 20070928 | CSAR_peak_ | 7.27          | + |
| chr5 | 20070953 | 20071033 | CSAR_peak_ | 9.79,7.47     | + |
| chr5 | 20071073 | 20071164 | CSAR_peak_ | 12.31,6.52    | + |
| chr5 | 20071235 | 20071284 | CSAR_peak_ | 7.27          | + |
| chr5 | 20081925 | 20081964 | CSAR_peak_ | 6.03          | + |
| chr5 | 20090973 | 20091011 | CSAR_peak_ | 6.57          | + |
| chr5 | 20091548 | 20091642 | CSAR_peak_ | 17.82         | + |
| chr5 | 20093045 | 20093091 | CSAR_peak_ | 6.57          | + |
| chr5 | 20101073 | 20101134 | CSAR_peak_ | 8.39          | + |
| chr5 | 20101972 | 20102016 | CSAR_peak_ | 6.21          | + |
| chr5 | 20104042 | 20104084 | CSAR_peak_ | 8.39          | + |
| chr5 | 20153630 | 20153680 | CSAR_peak_ | 9.58          | + |
| chr5 | 20216728 | 20216767 | CSAR_peak_ | 7.7           | + |
| chr5 | 20216846 | 20216863 | CSAR_peak_ | 10.83,11.38   | + |
| chr5 | 20216907 | 20216964 | CSAR_peak_ | 6.03,6.87     | + |
| chr5 | 20218149 | 20218176 | CSAR_peak_ | 7.27          | + |
| chr5 | 20219795 | 20219847 | CSAR_peak_ | 9.77          | + |
| chr5 | 20220156 | 20220192 | CSAR_peak_ | 7.27          | + |
| chr5 | 20220223 | 20220271 | CSAR_peak_ | 9.77,6.95     | + |
| chr5 | 20220579 | 20220611 | CSAR_peak_ | 6.57          | + |
| chr5 | 20220655 | 20220672 | CSAR_peak_ | 7.27          | + |
| chr5 | 20220749 | 20220858 | CSAR_peak_ | 10.31,8.65,6. | + |
| chr5 | 20220883 | 20221024 | CSAR_peak_ | 10.83,8.39,6. | + |
| chr5 | 20257432 | 20257473 | CSAR_peak_ | 6.95          | + |
| chr5 | 20317135 | 20317195 | CSAR_peak_ | 6.21          | + |
| chr5 | 20319090 | 20319118 | CSAR_peak_ | 6.57          | + |
| chr5 | 20319202 | 20319248 | CSAR_peak_ | 7.58          | + |
| chr5 | 20331268 | 20331320 | CSAR_peak_ | 8.39          | + |
| chr5 | 20432155 | 20432197 | CSAR_peak_ | 9.58          | + |
| chr5 | 20432200 | 20432250 | CSAR_peak_ | 17.37         | + |
| chr5 | 20652153 | 20652238 | CSAR_peak_ | 8.65          | + |

|      |          |          |            |               |   |
|------|----------|----------|------------|---------------|---|
| chr5 | 20653776 | 20653828 | CSAR_peak_ | 6.44          | + |
| chr5 | 20653910 | 20653930 | CSAR_peak_ | 7.27          | + |
| chr5 | 20686819 | 20686870 | CSAR_peak_ | 6.21          | + |
| chr5 | 20688237 | 20688288 | CSAR_peak_ | 8.39          | + |
| chr5 | 20688465 | 20688502 | CSAR_peak_ | 7.27          | + |
| chr5 | 20691323 | 20691371 | CSAR_peak_ | 11.96         | + |
| chr5 | 20692705 | 20692727 | CSAR_peak_ | 8.39          | + |
| chr5 | 20729686 | 20729842 | CSAR_peak_ | 9.03,10.95,9. | + |
| chr5 | 20729934 | 20729966 | CSAR_peak_ | 7.58          | + |
| chr5 | 20730174 | 20730231 | CSAR_peak_ | 7.27          | + |
| chr5 | 20730241 | 20730281 | CSAR_peak_ | 12.12,9.03    | + |
| chr5 | 20731170 | 20731220 | CSAR_peak_ | 7.27          | + |
| chr5 | 20731579 | 20731637 | CSAR_peak_ | 7.2,7.2       | + |
| chr5 | 20731775 | 20731787 | CSAR_peak_ | 6.78          | + |
| chr5 | 20731858 | 20731924 | CSAR_peak_ | 6.21,10.17,7. | + |
| chr5 | 20731984 | 20732040 | CSAR_peak_ | 11.14         | + |
| chr5 | 20732216 | 20732268 | CSAR_peak_ | 7.34          | + |
| chr5 | 20738358 | 20738427 | CSAR_peak_ | 6.21          | + |
| chr5 | 20745138 | 20745187 | CSAR_peak_ | 8.39          | + |
| chr5 | 20751658 | 20751745 | CSAR_peak_ | 12.13,6.21    | + |
| chr5 | 20765026 | 20765120 | CSAR_peak_ | 8.39,12.17    | + |
| chr5 | 20765570 | 20765642 | CSAR_peak_ | 7.73          | + |
| chr5 | 20765683 | 20765763 | CSAR_peak_ | 6.57,8.95,9.5 | + |
| chr5 | 20765801 | 20765835 | CSAR_peak_ | 8.65          | + |
| chr5 | 20765858 | 20765910 | CSAR_peak_ | 5.62          | + |
| chr5 | 20766307 | 20766364 | CSAR_peak_ | 7.92,6.03     | + |
| chr5 | 20766874 | 20766925 | CSAR_peak_ | 6.21          | + |
| chr5 | 20767440 | 20767492 | CSAR_peak_ | 14.88         | + |
| chr5 | 20767934 | 20768003 | CSAR_peak_ | 7.27          | + |
| chr5 | 20768299 | 20768353 | CSAR_peak_ | 9.58          | + |
| chr5 | 20768399 | 20768441 | CSAR_peak_ | 6.21          | + |
| chr5 | 20780404 | 20780445 | CSAR_peak_ | 6.95          | + |
| chr5 | 20790211 | 20790266 | CSAR_peak_ | 5.62          | + |
| chr5 | 20795720 | 20795836 | CSAR_peak_ | 55.46,25.77,} | + |
| chr5 | 20795959 | 20796029 | CSAR_peak_ | 144.52,95.01  | + |
| chr5 | 20796184 | 20796228 | CSAR_peak_ | 146.18,51.32  | + |
| chr5 | 20799250 | 20799302 | CSAR_peak_ | 9.77          | + |
| chr5 | 20805503 | 20805555 | CSAR_peak_ | 10.83         | + |
| chr5 | 20805656 | 20805715 | CSAR_peak_ | 7.27          | + |
| chr5 | 20805865 | 20805912 | CSAR_peak_ | 6.03          | + |
| chr5 | 20807269 | 20807355 | CSAR_peak_ | 6.57          | + |
| chr5 | 20809052 | 20809088 | CSAR_peak_ | 6.57          | + |

|      |          |          |            |               |   |
|------|----------|----------|------------|---------------|---|
| chr5 | 20809546 | 20809595 | CSAR_peak_ | 12.31,10.95,  | + |
| chr5 | 20809739 | 20809822 | CSAR_peak_ | 9.58          | + |
| chr5 | 20809944 | 20810003 | CSAR_peak_ | 7.27,7.7      | + |
| chr5 | 20810933 | 20810989 | CSAR_peak_ | 9.61          | + |
| chr5 | 20811285 | 20811386 | CSAR_peak_ | 10.62,11.8,7. | + |
| chr5 | 20811893 | 20811947 | CSAR_peak_ | 9.58,8.39     | + |
| chr5 | 20812333 | 20812390 | CSAR_peak_ | 12.21         | + |
| chr5 | 20812954 | 20813001 | CSAR_peak_ | 6.21          | + |
| chr5 | 20814955 | 20815012 | CSAR_peak_ | 9.58          | + |
| chr5 | 20815483 | 20815529 | CSAR_peak_ | 8.39          | + |
| chr5 | 20815872 | 20815931 | CSAR_peak_ | 6.21,7.58     | + |
| chr5 | 20816847 | 20816898 | CSAR_peak_ | 8.52          | + |
| chr5 | 20816903 | 20816957 | CSAR_peak_ | 13.85,7.26,7. | + |
| chr5 | 20817097 | 20817136 | CSAR_peak_ | 10.94         | + |
| chr5 | 20817824 | 20817872 | CSAR_peak_ | 14.88         | + |
| chr5 | 20818642 | 20818754 | CSAR_peak_ | 16.33,12.13   | + |
| chr5 | 20818912 | 20818954 | CSAR_peak_ | 9.58,7.27     | + |
| chr5 | 20820586 | 20820626 | CSAR_peak_ | 6.21          | + |
| chr5 | 20827655 | 20827685 | CSAR_peak_ | 6.57          | + |
| chr5 | 20827988 | 20828072 | CSAR_peak_ | 8.39,6.21     | + |
| chr5 | 20828330 | 20828436 | CSAR_peak_ | 20.43,12.5    | + |
| chr5 | 20828782 | 20828862 | CSAR_peak_ | 13.51         | + |
| chr5 | 20866754 | 20866802 | CSAR_peak_ | 6.02          | + |
| chr5 | 20866804 | 20866866 | CSAR_peak_ | 6.95          | + |
| chr5 | 20895788 | 20895828 | CSAR_peak_ | 14.85         | + |
| chr5 | 20895907 | 20895932 | CSAR_peak_ | 16.33         | + |
| chr5 | 20996772 | 20996804 | CSAR_peak_ | 11.41,19.43,  | + |
| chr5 | 20996842 | 20996912 | CSAR_peak_ | 43.7,17.28    | + |
| chr5 | 21035221 | 21035321 | CSAR_peak_ | 17.37,8.65    | + |
| chr5 | 21039856 | 21039896 | CSAR_peak_ | 8.39          | + |
| chr5 | 21040053 | 21040133 | CSAR_peak_ | 30.02,16.08   | + |
| chr5 | 21040200 | 21040293 | CSAR_peak_ | 7.73,11.14,8. | + |
| chr5 | 21040303 | 21040380 | CSAR_peak_ | 8.39          | + |
| chr5 | 21040394 | 21040458 | CSAR_peak_ | 6.03,6.45,9.5 | + |
| chr5 | 21040558 | 21040621 | CSAR_peak_ | 7.29,8.39     | + |
| chr5 | 21040926 | 21040973 | CSAR_peak_ | 10.95         | + |
| chr5 | 21041053 | 21041126 | CSAR_peak_ | 12.13,9.27    | + |
| chr5 | 21041271 | 21041317 | CSAR_peak_ | 8.39          | + |
| chr5 | 21041387 | 21041439 | CSAR_peak_ | 12.13         | + |
| chr5 | 21041526 | 21041575 | CSAR_peak_ | 10.83         | + |
| chr5 | 21072023 | 21072105 | CSAR_peak_ | 8.39          | + |
| chr5 | 21073876 | 21073957 | CSAR_peak_ | 8.39          | + |

|      |          |          |            |               |   |
|------|----------|----------|------------|---------------|---|
| chr5 | 21112623 | 21112673 | CSAR_peak_ | 6.21          | + |
| chr5 | 21112690 | 21112727 | CSAR_peak_ | 8.39          | + |
| chr5 | 21130390 | 21130434 | CSAR_peak_ | 6.03          | + |
| chr5 | 21131069 | 21131129 | CSAR_peak_ | 7.27,6.02     | + |
| chr5 | 21131144 | 21131201 | CSAR_peak_ | 20.13,12.31   | + |
| chr5 | 21131331 | 21131489 | CSAR_peak_ | 11.14,11.38   | + |
| chr5 | 21132280 | 21132327 | CSAR_peak_ | 7.92          | + |
| chr5 | 21132360 | 21132398 | CSAR_peak_ | 12.13         | + |
| chr5 | 21132644 | 21132724 | CSAR_peak_ | 7.78,5.62     | + |
| chr5 | 21132915 | 21132973 | CSAR_peak_ | 16.08         | + |
| chr5 | 21133068 | 21133192 | CSAR_peak_ | 21.41,6.11    | + |
| chr5 | 21139646 | 21139697 | CSAR_peak_ | 9.77          | + |
| chr5 | 21139894 | 21140017 | CSAR_peak_ | 16.33,6.21,6. | + |
| chr5 | 21140187 | 21140367 | CSAR_peak_ | 7.34,7.58,10. | + |
| chr5 | 21140376 | 21140451 | CSAR_peak_ | 14.25,6.54    | + |
| chr5 | 21162171 | 21162209 | CSAR_peak_ | 12.13         | + |
| chr5 | 21164141 | 21164194 | CSAR_peak_ | 8.95          | + |
| chr5 | 21164541 | 21164570 | CSAR_peak_ | 6.21          | + |
| chr5 | 21172075 | 21172116 | CSAR_peak_ | 6.21          | + |
| chr5 | 21214217 | 21214323 | CSAR_peak_ | 11.14,6.21    | + |
| chr5 | 21229449 | 21229502 | CSAR_peak_ | 7.27,8.39     | + |
| chr5 | 21240856 | 21241096 | CSAR_peak_ | 18.61,12.68,  | + |
| chr5 | 21241125 | 21241384 | CSAR_peak_ | 13.72,9.11,5! | + |
| chr5 | 21241411 | 21241563 | CSAR_peak_ | 13.14,10.48,( | + |
| chr5 | 21241648 | 21241761 | CSAR_peak_ | 12.8,8.82     | + |
| chr5 | 21241762 | 21242577 | CSAR_peak_ | 15.32,25.1,2  | + |
| chr5 | 21242579 | 21242615 | CSAR_peak_ | 14.85         | + |
| chr5 | 21242634 | 21243157 | CSAR_peak_ | 8.95,16.05,1! | + |
| chr5 | 21243177 | 21243209 | CSAR_peak_ | 10.83         | + |
| chr5 | 21243302 | 21243449 | CSAR_peak_ | 7.34,9.61,6.2 | + |
| chr5 | 21295736 | 21295810 | CSAR_peak_ | 7.28,16.7,35. | + |
| chr5 | 21317559 | 21317638 | CSAR_peak_ | 7.58,9.58     | + |
| chr5 | 21317883 | 21317941 | CSAR_peak_ | 8.39          | + |
| chr5 | 21318304 | 21318398 | CSAR_peak_ | 9.77,8.95     | + |
| chr5 | 21318502 | 21318537 | CSAR_peak_ | 6.21          | + |
| chr5 | 21319518 | 21319570 | CSAR_peak_ | 10.83         | + |
| chr5 | 21319620 | 21319721 | CSAR_peak_ | 8.28          | + |
| chr5 | 21320043 | 21320116 | CSAR_peak_ | 10.66,7.58    | + |
| chr5 | 21320150 | 21320211 | CSAR_peak_ | 9.77          | + |
| chr5 | 21320751 | 21320795 | CSAR_peak_ | 10.95         | + |
| chr5 | 21333688 | 21333727 | CSAR_peak_ | 10.83         | + |
| chr5 | 21338045 | 21338118 | CSAR_peak_ | 9.61,6.78     | + |

|      |          |          |            |                |
|------|----------|----------|------------|----------------|
| chr5 | 21338206 | 21338288 | CSAR_peak_ | 6.85,8.39,5.9+ |
| chr5 | 21338380 | 21338412 | CSAR_peak_ | 6.21 +         |
| chr5 | 21338543 | 21338599 | CSAR_peak_ | 8.65,9.77 +    |
| chr5 | 21339750 | 21339816 | CSAR_peak_ | 7.27 +         |
| chr5 | 21340841 | 21340887 | CSAR_peak_ | 9.58 +         |
| chr5 | 21340916 | 21340955 | CSAR_peak_ | 10.31 +        |
| chr5 | 21340992 | 21341059 | CSAR_peak_ | 8.65,9.27,6.4+ |
| chr5 | 21341090 | 21341159 | CSAR_peak_ | 12.17,11.63,+  |
| chr5 | 21341352 | 21341402 | CSAR_peak_ | 5.62 +         |
| chr5 | 21341807 | 21341852 | CSAR_peak_ | 9.58 +         |
| chr5 | 21342599 | 21342671 | CSAR_peak_ | 8.39 +         |
| chr5 | 21343209 | 21343256 | CSAR_peak_ | 8.95 +         |
| chr5 | 21343498 | 21343558 | CSAR_peak_ | 12.31,9.58 +   |
| chr5 | 21343817 | 21343866 | CSAR_peak_ | 21.94 +        |
| chr5 | 21464227 | 21464272 | CSAR_peak_ | 8.39 +         |
| chr5 | 21515273 | 21515332 | CSAR_peak_ | 6.21,12.13 +   |
| chr5 | 21515812 | 21515864 | CSAR_peak_ | 6.57 +         |
| chr5 | 21516628 | 21516680 | CSAR_peak_ | 6.02 +         |
| chr5 | 21518165 | 21518219 | CSAR_peak_ | 11.14 +        |
| chr5 | 21549335 | 21549411 | CSAR_peak_ | 10.83 +        |
| chr5 | 21550361 | 21550381 | CSAR_peak_ | 8.39 +         |
| chr5 | 21550673 | 21550716 | CSAR_peak_ | 6.02,8.39 +    |
| chr5 | 21551445 | 21551494 | CSAR_peak_ | 6.21 +         |
| chr5 | 21551669 | 21551708 | CSAR_peak_ | 7.27 +         |
| chr5 | 21551794 | 21551806 | CSAR_peak_ | 8.39 +         |
| chr5 | 21554896 | 21554963 | CSAR_peak_ | 11.38,10.02 +  |
| chr5 | 21561537 | 21561661 | CSAR_peak_ | 21.94,6.14,6.+ |
| chr5 | 21561764 | 21561861 | CSAR_peak_ | 6.21,8.39 +    |
| chr5 | 21563234 | 21563287 | CSAR_peak_ | 9.77,7.27 +    |
| chr5 | 21596524 | 21596645 | CSAR_peak_ | 8.65,7.92 +    |
| chr5 | 21597000 | 21597073 | CSAR_peak_ | 8.39 +         |
| chr5 | 21597528 | 21597618 | CSAR_peak_ | 6.57 +         |
| chr5 | 21634935 | 21634978 | CSAR_peak_ | 6.95 +         |
| chr5 | 21644554 | 21644594 | CSAR_peak_ | 7.34 +         |
| chr5 | 21644772 | 21644814 | CSAR_peak_ | 9.77 +         |
| chr5 | 21644922 | 21644969 | CSAR_peak_ | 14.88 +        |
| chr5 | 21644991 | 21645035 | CSAR_peak_ | 8.61 +         |
| chr5 | 21645484 | 21645565 | CSAR_peak_ | 6.02,6.95,6.4+ |
| chr5 | 21645898 | 21645929 | CSAR_peak_ | 10.95 +        |
| chr5 | 21646686 | 21646732 | CSAR_peak_ | 6.44 +         |
| chr5 | 21646809 | 21646856 | CSAR_peak_ | 7.27 +         |
| chr5 | 21647208 | 21647266 | CSAR_peak_ | 6.57 +         |

|      |          |          |            |               |   |
|------|----------|----------|------------|---------------|---|
| chr5 | 21677980 | 21678047 | CSAR_peak_ | 7.27          | + |
| chr5 | 21690195 | 21690248 | CSAR_peak_ | 6.21          | + |
| chr5 | 21690583 | 21690619 | CSAR_peak_ | 6.21          | + |
| chr5 | 21690897 | 21690954 | CSAR_peak_ | 10.83         | + |
| chr5 | 21700614 | 21700682 | CSAR_peak_ | 6.44          | + |
| chr5 | 21700862 | 21700941 | CSAR_peak_ | 20.94,37.04,  | + |
| chr5 | 21700974 | 21701036 | CSAR_peak_ | 8.7,8.34      | + |
| chr5 | 21701102 | 21701120 | CSAR_peak_ | 13            | + |
| chr5 | 21701497 | 21701536 | CSAR_peak_ | 6.44          | + |
| chr5 | 21701862 | 21701898 | CSAR_peak_ | 6.14          | + |
| chr5 | 21702030 | 21702099 | CSAR_peak_ | 6.21          | + |
| chr5 | 21702167 | 21702215 | CSAR_peak_ | 7.27          | + |
| chr5 | 21702407 | 21702466 | CSAR_peak_ | 10.15,8.44    | + |
| chr5 | 21702767 | 21702826 | CSAR_peak_ | 6.57          | + |
| chr5 | 21702989 | 21703031 | CSAR_peak_ | 10.99         | + |
| chr5 | 21703297 | 21703477 | CSAR_peak_ | 8.65,12.17    | + |
| chr5 | 21703540 | 21703608 | CSAR_peak_ | 14.88,8.39    | + |
| chr5 | 21703615 | 21703626 | CSAR_peak_ | 6.21          | + |
| chr5 | 21703706 | 21703807 | CSAR_peak_ | 6.1           | + |
| chr5 | 21704099 | 21704191 | CSAR_peak_ | 21.37,5.92,7. | + |
| chr5 | 21704543 | 21704595 | CSAR_peak_ | 6.21          | + |
| chr5 | 21704829 | 21704860 | CSAR_peak_ | 6.21          | + |
| chr5 | 21704915 | 21705005 | CSAR_peak_ | 6.21          | + |
| chr5 | 21705019 | 21705053 | CSAR_peak_ | 7.58          | + |
| chr5 | 21705104 | 21705158 | CSAR_peak_ | 9.58,8.1      | + |
| chr5 | 21705360 | 21705400 | CSAR_peak_ | 7.73,9.58     | + |
| chr5 | 21705605 | 21705634 | CSAR_peak_ | 5.71          | + |
| chr5 | 21705716 | 21705767 | CSAR_peak_ | 12.13         | + |
| chr5 | 21706190 | 21706243 | CSAR_peak_ | 6.95          | + |
| chr5 | 21706329 | 21706441 | CSAR_peak_ | 13.72,13.09   | + |
| chr5 | 21706737 | 21706800 | CSAR_peak_ | 13.48,16.11   | + |
| chr5 | 21706903 | 21707130 | CSAR_peak_ | 6.44,7.06,9.5 | + |
| chr5 | 21707331 | 21707420 | CSAR_peak_ | 19.01,12.76   | + |
| chr5 | 21707612 | 21707662 | CSAR_peak_ | 12.17         | + |
| chr5 | 21707832 | 21707929 | CSAR_peak_ | 14.88,8.65    | + |
| chr5 | 21708268 | 21708320 | CSAR_peak_ | 10.83,13.66   | + |
| chr5 | 21708478 | 21708513 | CSAR_peak_ | 7.58          | + |
| chr5 | 21708561 | 21708617 | CSAR_peak_ | 8.95,14.76    | + |
| chr5 | 21708946 | 21709002 | CSAR_peak_ | 10.95         | + |
| chr5 | 21709143 | 21709195 | CSAR_peak_ | 6.38          | + |
| chr5 | 21709218 | 21709273 | CSAR_peak_ | 8.39          | + |
| chr5 | 21709522 | 21709566 | CSAR_peak_ | 7.29          | + |

|      |          |          |            |               |   |
|------|----------|----------|------------|---------------|---|
| chr5 | 21709591 | 21709606 | CSAR_peak_ | 6.57          | + |
| chr5 | 21709725 | 21709772 | CSAR_peak_ | 6.11          | + |
| chr5 | 21711913 | 21711950 | CSAR_peak_ | 7.27          | + |
| chr5 | 21714020 | 21714096 | CSAR_peak_ | 6.57,7.27     | + |
| chr5 | 21714225 | 21714276 | CSAR_peak_ | 6.21          | + |
| chr5 | 21714864 | 21714902 | CSAR_peak_ | 6.21          | + |
| chr5 | 21715753 | 21715805 | CSAR_peak_ | 7.27          | + |
| chr5 | 21716004 | 21716129 | CSAR_peak_ | 14.88         | + |
| chr5 | 21716500 | 21716588 | CSAR_peak_ | 13.44         | + |
| chr5 | 21756111 | 21756167 | CSAR_peak_ | 5.62          | + |
| chr5 | 21756216 | 21756261 | CSAR_peak_ | 6.21          | + |
| chr5 | 21756419 | 21756470 | CSAR_peak_ | 7.27          | + |
| chr5 | 21757694 | 21757761 | CSAR_peak_ | 19.36,6.57,8. | + |
| chr5 | 21782868 | 21782906 | CSAR_peak_ | 5.62          | + |
| chr5 | 21784018 | 21784068 | CSAR_peak_ | 6.03          | + |
| chr5 | 21888292 | 21888512 | CSAR_peak_ | 331.79,204.0  | + |
| chr5 | 21888948 | 21888953 | CSAR_peak_ | 16.77,31.03   | + |
| chr5 | 21912433 | 21912492 | CSAR_peak_ | 8.65,6.44     | + |
| chr5 | 21947653 | 21947707 | CSAR_peak_ | 8.39          | + |
| chr5 | 21947999 | 21948075 | CSAR_peak_ | 8.28          | + |
| chr5 | 21959234 | 21959291 | CSAR_peak_ | 6.94,8.65     | + |
| chr5 | 21959324 | 21959355 | CSAR_peak_ | 6.21          | + |
| chr5 | 21959980 | 21960006 | CSAR_peak_ | 6.21          | + |
| chr5 | 21960059 | 21960163 | CSAR_peak_ | 10.95,16.33,  | + |
| chr5 | 21984029 | 21984079 | CSAR_peak_ | 7.27          | + |
| chr5 | 21990615 | 21990814 | CSAR_peak_ | 120.28,89.76  | + |
| chr5 | 22102055 | 22102104 | CSAR_peak_ | 9.58          | + |
| chr5 | 22102326 | 22102334 | CSAR_peak_ | 7.58          | + |
| chr5 | 22107149 | 22107213 | CSAR_peak_ | 9.27,5.62     | + |
| chr5 | 22124645 | 22124697 | CSAR_peak_ | 11.66,16.05   | + |
| chr5 | 22124906 | 22125072 | CSAR_peak_ | 16.11,14.63,  | + |
| chr5 | 22125134 | 22125146 | CSAR_peak_ | 6.21          | + |
| chr5 | 22125265 | 22125315 | CSAR_peak_ | 6.21          | + |
| chr5 | 22125626 | 22125671 | CSAR_peak_ | 6.57          | + |
| chr5 | 22125791 | 22125845 | CSAR_peak_ | 7.27          | + |
| chr5 | 22126069 | 22126084 | CSAR_peak_ | 6.52          | + |
| chr5 | 22157578 | 22157692 | CSAR_peak_ | 7.27,9.58     | + |
| chr5 | 22184307 | 22184372 | CSAR_peak_ | 6.21          | + |
| chr5 | 22218350 | 22218407 | CSAR_peak_ | 7.27,6.85,11. | + |
| chr5 | 22244721 | 22244776 | CSAR_peak_ | 12.13         | + |
| chr5 | 22244957 | 22244991 | CSAR_peak_ | 7.27          | + |
| chr5 | 22245062 | 22245148 | CSAR_peak_ | 7.58          | + |

|      |          |          |                           |
|------|----------|----------|---------------------------|
| chr5 | 22247566 | 22247729 | CSAR_peak_(16.34,8.95,9.+ |
| chr5 | 22247730 | 22247736 | CSAR_peak_(6.52 +         |
| chr5 | 22289864 | 22289926 | CSAR_peak_(6.03 +         |
| chr5 | 22342476 | 22342532 | CSAR_peak_(6.95,12.17 +   |
| chr5 | 22342924 | 22342984 | CSAR_peak_(16.05,6.52 +   |
| chr5 | 22343322 | 22343374 | CSAR_peak_(6.57,17.37 +   |
| chr5 | 22345920 | 22345942 | CSAR_peak_(8.39 +         |
| chr5 | 22346113 | 22346136 | CSAR_peak_(7.27 +         |
| chr5 | 22349616 | 22349634 | CSAR_peak_(6.21 +         |
| chr5 | 22388985 | 22389064 | CSAR_peak_(6.21 +         |
| chr5 | 22392424 | 22392494 | CSAR_peak_(6.21 +         |
| chr5 | 22392996 | 22393051 | CSAR_peak_(6.95 +         |
| chr5 | 22399284 | 22399295 | CSAR_peak_(6.21 +         |
| chr5 | 22400455 | 22400506 | CSAR_peak_(8.39 +         |
| chr5 | 22404252 | 22404320 | CSAR_peak_(7.27,9.32 +    |
| chr5 | 22404725 | 22404780 | CSAR_peak_(9.58 +         |
| chr5 | 22455100 | 22455199 | CSAR_peak_(12.6,12.93 +   |
| chr5 | 22539374 | 22539424 | CSAR_peak_(6.03 +         |
| chr5 | 22539505 | 22539573 | CSAR_peak_(7.92,7.58 +    |
| chr5 | 22539688 | 22539742 | CSAR_peak_(7.27 +         |
| chr5 | 22539824 | 22539995 | CSAR_peak_(8.65 +         |
| chr5 | 22540025 | 22540143 | CSAR_peak_(9.77,10.02 +   |
| chr5 | 22541930 | 22541966 | CSAR_peak_(6.03 +         |
| chr5 | 22542137 | 22542193 | CSAR_peak_(7.27 +         |
| chr5 | 22543030 | 22543083 | CSAR_peak_(6.95 +         |
| chr5 | 22552759 | 22552776 | CSAR_peak_(6.03 +         |
| chr5 | 22552788 | 22552798 | CSAR_peak_(6.95 +         |
| chr5 | 22553177 | 22553253 | CSAR_peak_(6.21,9.03 +    |
| chr5 | 22553801 | 22553887 | CSAR_peak_(6.57,12.31 +   |
| chr5 | 22554118 | 22554172 | CSAR_peak_(12.31,7.27 +   |
| chr5 | 22554550 | 22554648 | CSAR_peak_(19.36 +        |
| chr5 | 22603689 | 22603739 | CSAR_peak_(6.21 +         |
| chr5 | 22604514 | 22604559 | CSAR_peak_(6.57 +         |
| chr5 | 22604574 | 22604646 | CSAR_peak_(7.27 +         |
| chr5 | 22667694 | 22667749 | CSAR_peak_(5.62,14.88,9.+ |
| chr5 | 22668083 | 22668174 | CSAR_peak_(6.21 +         |
| chr5 | 22668371 | 22668422 | CSAR_peak_(6.21,6.21 +    |
| chr5 | 22668826 | 22668952 | CSAR_peak_(14.88 +        |
| chr5 | 22669166 | 22669219 | CSAR_peak_(6.57 +         |
| chr5 | 22688897 | 22688948 | CSAR_peak_(6.95 +         |
| chr5 | 22726711 | 22726752 | CSAR_peak_(6.03 +         |
| chr5 | 22727557 | 22727604 | CSAR_peak_(6.52 +         |



|      |          |          |             |                 |   |
|------|----------|----------|-------------|-----------------|---|
| chr5 | 22727610 | 22727696 | CSAR_peak_1 | 7.26,8.28       | + |
| chr5 | 22727945 | 22728048 | CSAR_peak_1 | 6.21            | + |
| chr5 | 22732909 | 22732958 | CSAR_peak_1 | 9.77            | + |
| chr5 | 22736005 | 22736070 | CSAR_peak_1 | 7.27            | + |
| chr5 | 22736143 | 22736154 | CSAR_peak_1 | 6.21            | + |
| chr5 | 22736249 | 22736293 | CSAR_peak_1 | 6.1,6.57        | + |
| chr5 | 22736495 | 22736536 | CSAR_peak_1 | 7.27            | + |
| chr5 | 22736663 | 22736712 | CSAR_peak_1 | 6.57            | + |
| chr5 | 22736869 | 22737014 | CSAR_peak_1 | 16.33,8.39      | + |
| chr5 | 22737090 | 22737201 | CSAR_peak_1 | 8.39,7.58       | + |
| chr5 | 22737578 | 22737646 | CSAR_peak_1 | 9.58            | + |
| chr5 | 22742988 | 22743061 | CSAR_peak_1 | 9.58,7.58       | + |
| chr5 | 22743535 | 22743575 | CSAR_peak_1 | 10.83,14.88     | + |
| chr5 | 22743677 | 22743726 | CSAR_peak_1 | 9.27,9.58       | + |
| chr5 | 22744375 | 22744414 | CSAR_peak_1 | 8.52            | + |
| chr5 | 22744510 | 22744527 | CSAR_peak_1 | 7.27            | + |
| chr5 | 22790675 | 22790733 | CSAR_peak_1 | 8.39            | + |
| chr5 | 22818474 | 22818572 | CSAR_peak_1 | 7.27,9.58       | + |
| chr5 | 22819183 | 22819240 | CSAR_peak_1 | 6.57            | + |
| chr5 | 22828537 | 22828588 | CSAR_peak_1 | 45.67,72.97     | + |
| chr5 | 22828628 | 22828705 | CSAR_peak_1 | 23.73,7.83,4.1  | + |
| chr5 | 22828809 | 22828833 | CSAR_peak_1 | 17.52,11.83     | + |
| chr5 | 22828863 | 22828900 | CSAR_peak_1 | 24.34,29.97     | + |
| chr5 | 22828960 | 22829048 | CSAR_peak_1 | 7.84,73.13,1.1  | + |
| chr5 | 22959307 | 22959342 | CSAR_peak_1 | 6.57            | + |
| chr5 | 22959406 | 22959467 | CSAR_peak_1 | 9.77,7.58,6.0   | + |
| chr5 | 22960010 | 22960045 | CSAR_peak_1 | 10.95           | + |
| chr5 | 22960257 | 22960292 | CSAR_peak_1 | 6.94            | + |
| chr5 | 23004688 | 23004764 | CSAR_peak_1 | 8.61,9.32,25.1  | + |
| chr5 | 23004929 | 23005042 | CSAR_peak_1 | 16.33,5.75,7.1  | + |
| chr5 | 23005130 | 23005225 | CSAR_peak_1 | 9.29,17.52,9.1  | + |
| chr5 | 23005288 | 23005357 | CSAR_peak_1 | 19.36           | + |
| chr5 | 23005397 | 23005412 | CSAR_peak_1 | 6.74            | + |
| chr5 | 23005459 | 23005534 | CSAR_peak_1 | 8.61,5.62,12.1  | + |
| chr5 | 23005627 | 23005676 | CSAR_peak_1 | 8.69,8.39       | + |
| chr5 | 23005998 | 23006115 | CSAR_peak_1 | 14.73,25.18,1.1 | + |
| chr5 | 23006213 | 23006235 | CSAR_peak_1 | 6.72            | + |
| chr5 | 23006306 | 23006319 | CSAR_peak_1 | 10.02           | + |
| chr5 | 23006414 | 23006536 | CSAR_peak_1 | 7.73,6.14       | + |
| chr5 | 23006575 | 23006594 | CSAR_peak_1 | 6.02            | + |
| chr5 | 23006908 | 23006942 | CSAR_peak_1 | 8.28,7.34       | + |
| chr5 | 23007030 | 23007206 | CSAR_peak_1 | 9.77,6.21,6.6   | + |

|      |          |          |            |                   |   |
|------|----------|----------|------------|-------------------|---|
| chr5 | 23007207 | 23007218 | CSAR_peak_ | 5.62              | + |
| chr5 | 23007266 | 23007342 | CSAR_peak_ | 6.58,7.36         | + |
| chr5 | 23007415 | 23007539 | CSAR_peak_ | 9.27,14.85,14.85  | + |
| chr5 | 23007546 | 23007578 | CSAR_peak_ | 5.97              | + |
| chr5 | 23007682 | 23007725 | CSAR_peak_ | 6.53              | + |
| chr5 | 23007763 | 23007808 | CSAR_peak_ | 17.92,6.6,7.3     | + |
| chr5 | 23007965 | 23008010 | CSAR_peak_ | 17.02             | + |
| chr5 | 23008102 | 23008122 | CSAR_peak_ | 16.08             | + |
| chr5 | 23008165 | 23008277 | CSAR_peak_ | 8.75              | + |
| chr5 | 23008349 | 23008417 | CSAR_peak_ | 6.21              | + |
| chr5 | 23033483 | 23033536 | CSAR_peak_ | 13.51,11.14       | + |
| chr5 | 23034091 | 23034128 | CSAR_peak_ | 6.21              | + |
| chr5 | 23034235 | 23034265 | CSAR_peak_ | 6.21              | + |
| chr5 | 23034650 | 23034705 | CSAR_peak_ | 6.03              | + |
| chr5 | 23068619 | 23068684 | CSAR_peak_ | 8.65,7.27         | + |
| chr5 | 23068805 | 23068843 | CSAR_peak_ | 6.21              | + |
| chr5 | 23069458 | 23069512 | CSAR_peak_ | 8.65              | + |
| chr5 | 23071446 | 23071534 | CSAR_peak_ | 10.83             | + |
| chr5 | 23072747 | 23072809 | CSAR_peak_ | 7.34,17.51        | + |
| chr5 | 23073524 | 23073567 | CSAR_peak_ | 6.21,12.17        | + |
| chr5 | 23073678 | 23073749 | CSAR_peak_ | 17.52             | + |
| chr5 | 23074359 | 23074411 | CSAR_peak_ | 6.21,6.12,13.66   | + |
| chr5 | 23077648 | 23077683 | CSAR_peak_ | 6.21              | + |
| chr5 | 23078933 | 23078978 | CSAR_peak_ | 6.95              | + |
| chr5 | 23091004 | 23091060 | CSAR_peak_ | 6.21              | + |
| chr5 | 23152339 | 23152422 | CSAR_peak_ | 7.73,13.66        | + |
| chr5 | 23152584 | 23152601 | CSAR_peak_ | 9.58              | + |
| chr5 | 23228058 | 23228114 | CSAR_peak_ | 6.57,6.03         | + |
| chr5 | 23228596 | 23229012 | CSAR_peak_ | 19.93,19.43,19.43 | + |
| chr5 | 23229048 | 23229086 | CSAR_peak_ | 6.21              | + |
| chr5 | 23310925 | 23310989 | CSAR_peak_ | 8.65,8.95         | + |
| chr5 | 23311062 | 23311121 | CSAR_peak_ | 6.21              | + |
| chr5 | 23311302 | 23311429 | CSAR_peak_ | 19.36,13.44,13.44 | + |
| chr5 | 23347188 | 23347219 | CSAR_peak_ | 8.39,12.13        | + |
| chr5 | 23347267 | 23347299 | CSAR_peak_ | 9.27              | + |
| chr5 | 23347361 | 23347413 | CSAR_peak_ | 8.39              | + |
| chr5 | 23347670 | 23347743 | CSAR_peak_ | 26.96             | + |
| chr5 | 23347759 | 23347827 | CSAR_peak_ | 6.95,7.52         | + |
| chr5 | 23347861 | 23347919 | CSAR_peak_ | 16.47,6.2         | + |
| chr5 | 23348007 | 23348057 | CSAR_peak_ | 7.27              | + |
| chr5 | 23348104 | 23348170 | CSAR_peak_ | 27.06             | + |
| chr5 | 23348373 | 23348411 | CSAR_peak_ | 5.9               | + |

|      |          |          |            |               |   |
|------|----------|----------|------------|---------------|---|
| chr5 | 23348498 | 23348538 | CSAR_peak_ | 10.31         | + |
| chr5 | 23348560 | 23348670 | CSAR_peak_ | 9.27,6.95,6.4 | + |
| chr5 | 23348897 | 23348950 | CSAR_peak_ | 6.37          | + |
| chr5 | 23349055 | 23349126 | CSAR_peak_ | 8.12,8.3      | + |
| chr5 | 23349209 | 23349264 | CSAR_peak_ | 9.76          | + |
| chr5 | 23349328 | 23349378 | CSAR_peak_ | 8.39,7.13,7.2 | + |
| chr5 | 23349401 | 23349451 | CSAR_peak_ | 6.74,10.12    | + |
| chr5 | 23349455 | 23349554 | CSAR_peak_ | 9.58,16.11,8. | + |
| chr5 | 23349711 | 23349825 | CSAR_peak_ | 7.92,17.37,6. | + |
| chr5 | 23355547 | 23355565 | CSAR_peak_ | 8.39          | + |
| chr5 | 23355917 | 23355967 | CSAR_peak_ | 8.39          | + |
| chr5 | 23356155 | 23356209 | CSAR_peak_ | 6.21          | + |
| chr5 | 23356362 | 23356505 | CSAR_peak_ | 13.48,14.08   | + |
| chr5 | 23356506 | 23356635 | CSAR_peak_ | 25.02,14.01,  | + |
| chr5 | 23356659 | 23356731 | CSAR_peak_ | 16.33,10.33   | + |
| chr5 | 23357028 | 23357073 | CSAR_peak_ | 12.13,10.83   | + |
| chr5 | 23357095 | 23357114 | CSAR_peak_ | 7.27          | + |
| chr5 | 23385685 | 23385767 | CSAR_peak_ | 12.6,8.65     | + |
| chr5 | 23385772 | 23385847 | CSAR_peak_ | 7.58,13.51    | + |
| chr5 | 23385903 | 23385975 | CSAR_peak_ | 20.94         | + |
| chr5 | 23386066 | 23386127 | CSAR_peak_ | 13.44         | + |
| chr5 | 23386238 | 23386277 | CSAR_peak_ | 7.27          | + |
| chr5 | 23386855 | 23386958 | CSAR_peak_ | 13.51,7.29    | + |
| chr5 | 23387245 | 23387324 | CSAR_peak_ | 12.13         | + |
| chr5 | 23387420 | 23387538 | CSAR_peak_ | 7.92,16.88,1. | + |
| chr5 | 23387623 | 23387661 | CSAR_peak_ | 6.21          | + |
| chr5 | 23387797 | 23387917 | CSAR_peak_ | 8.39,13.48    | + |
| chr5 | 23388048 | 23388098 | CSAR_peak_ | 7.27          | + |
| chr5 | 23400742 | 23400774 | CSAR_peak_ | 7.73          | + |
| chr5 | 23401054 | 23401095 | CSAR_peak_ | 7.27          | + |
| chr5 | 23440277 | 23440408 | CSAR_peak_ | 80.34,6.54,7. | + |
| chr5 | 23440778 | 23440872 | CSAR_peak_ | 6.21,39.3,12. | + |
| chr5 | 23441311 | 23441371 | CSAR_peak_ | 7.27,9.77     | + |
| chr5 | 23441773 | 23441828 | CSAR_peak_ | 9.58          | + |
| chr5 | 23442435 | 23442483 | CSAR_peak_ | 8.39          | + |
| chr5 | 23457458 | 23457537 | CSAR_peak_ | 6.57,6.57     | + |
| chr5 | 23458698 | 23458738 | CSAR_peak_ | 7.47          | + |
| chr5 | 23459517 | 23459547 | CSAR_peak_ | 6.03          | + |
| chr5 | 23459549 | 23459610 | CSAR_peak_ | 6.03,6.03,6.2 | + |
| chr5 | 23460045 | 23460093 | CSAR_peak_ | 6.21          | + |
| chr5 | 23460544 | 23460619 | CSAR_peak_ | 6.57          | + |
| chr5 | 23489340 | 23489375 | CSAR_peak_ | 6.44          | + |

|      |          |          |            |               |   |
|------|----------|----------|------------|---------------|---|
| chr5 | 23489493 | 23489569 | CSAR_peak_ | 13.44         | + |
| chr5 | 23490591 | 23490640 | CSAR_peak_ | 8.95,6.57     | + |
| chr5 | 23491524 | 23491575 | CSAR_peak_ | 6.21          | + |
| chr5 | 23492321 | 23492386 | CSAR_peak_ | 6.21          | + |
| chr5 | 23492785 | 23492969 | CSAR_peak_ | 10.83,8.95,9. | + |
| chr5 | 23493742 | 23493798 | CSAR_peak_ | 7.27          | + |
| chr5 | 23511497 | 23511549 | CSAR_peak_ | 6.21          | + |
| chr5 | 23511812 | 23511852 | CSAR_peak_ | 10.53         | + |
| chr5 | 23512727 | 23512781 | CSAR_peak_ | 9.58          | + |
| chr5 | 23514148 | 23514241 | CSAR_peak_ | 16.33,17.37,  | + |
| chr5 | 23514381 | 23514438 | CSAR_peak_ | 6.95,11.96    | + |
| chr5 | 23519010 | 23519064 | CSAR_peak_ | 10.83         | + |
| chr5 | 23524957 | 23525013 | CSAR_peak_ | 6.21          | + |
| chr5 | 23525667 | 23525759 | CSAR_peak_ | 8.39          | + |
| chr5 | 23525885 | 23525901 | CSAR_peak_ | 6.21          | + |
| chr5 | 23526022 | 23526082 | CSAR_peak_ | 8.39          | + |
| chr5 | 23527151 | 23527181 | CSAR_peak_ | 6.02,7.27     | + |
| chr5 | 23527267 | 23527311 | CSAR_peak_ | 8.39          | + |
| chr5 | 23527592 | 23527628 | CSAR_peak_ | 6.85          | + |
| chr5 | 23527926 | 23527969 | CSAR_peak_ | 8.39          | + |
| chr5 | 23528964 | 23529017 | CSAR_peak_ | 9.58          | + |
| chr5 | 23529149 | 23529219 | CSAR_peak_ | 19.01,28.21   | + |
| chr5 | 23529317 | 23529328 | CSAR_peak_ | 7.27          | + |
| chr5 | 23549617 | 23549650 | CSAR_peak_ | 10.31,12.31   | + |
| chr5 | 23549738 | 23549780 | CSAR_peak_ | 9.35          | + |
| chr5 | 23549976 | 23550039 | CSAR_peak_ | 13.29,10.12   | + |
| chr5 | 23550873 | 23550919 | CSAR_peak_ | 5.79          | + |
| chr5 | 23551245 | 23551257 | CSAR_peak_ | 6.87          | + |
| chr5 | 23551297 | 23551352 | CSAR_peak_ | 9.67,7.89     | + |
| chr5 | 23551427 | 23551512 | CSAR_peak_ | 7.2,6.92      | + |
| chr5 | 23551686 | 23551761 | CSAR_peak_ | 9.77,6.02     | + |
| chr5 | 23551789 | 23551846 | CSAR_peak_ | 11.83         | + |
| chr5 | 23551882 | 23551902 | CSAR_peak_ | 6.57          | + |
| chr5 | 23551936 | 23551970 | CSAR_peak_ | 7.58          | + |
| chr5 | 23562773 | 23562809 | CSAR_peak_ | 6.21          | + |
| chr5 | 23563872 | 23563938 | CSAR_peak_ | 7.27          | + |
| chr5 | 23564446 | 23564487 | CSAR_peak_ | 5.62          | + |
| chr5 | 23565301 | 23565332 | CSAR_peak_ | 6.03          | + |
| chr5 | 23566747 | 23566796 | CSAR_peak_ | 8.39          | + |
| chr5 | 23569289 | 23569371 | CSAR_peak_ | 6.02,8.39     | + |
| chr5 | 23569933 | 23569956 | CSAR_peak_ | 8.39          | + |
| chr5 | 23571048 | 23571107 | CSAR_peak_ | 13.44,9.27    | + |

|      |          |          |             |                |   |
|------|----------|----------|-------------|----------------|---|
| chr5 | 23571111 | 23571192 | CSAR_peak_1 | 8.39           | + |
| chr5 | 23574742 | 23574809 | CSAR_peak_1 | 6.21           | + |
| chr5 | 23583618 | 23583657 | CSAR_peak_1 | 6.21           | + |
| chr5 | 23583743 | 23583798 | CSAR_peak_1 | 8.39           | + |
| chr5 | 23585488 | 23585578 | CSAR_peak_1 | 7.34,9.97,12.  | + |
| chr5 | 23585645 | 23585702 | CSAR_peak_1 | 6.95           | + |
| chr5 | 23586767 | 23586830 | CSAR_peak_1 | 16.33,6.21     | + |
| chr5 | 23610624 | 23610666 | CSAR_peak_1 | 6.21           | + |
| chr5 | 23629116 | 23629157 | CSAR_peak_1 | 6.21           | + |
| chr5 | 23718681 | 23718715 | CSAR_peak_1 | 6.21           | + |
| chr5 | 23880929 | 23880967 | CSAR_peak_1 | 6.21           | + |
| chr5 | 23958173 | 23958207 | CSAR_peak_1 | 6.21           | + |
| chr5 | 23958357 | 23958407 | CSAR_peak_1 | 6.57           | + |
| chr5 | 23959212 | 23959267 | CSAR_peak_1 | 11.14,10.95    | + |
| chr5 | 23962311 | 23962376 | CSAR_peak_1 | 30.02,32.27    | + |
| chr5 | 23962471 | 23962506 | CSAR_peak_1 | 12.35,8.92     | + |
| chr5 | 23963760 | 23963817 | CSAR_peak_1 | 8.13           | + |
| chr5 | 23964428 | 23964511 | CSAR_peak_1 | 7.27           | + |
| chr5 | 23968664 | 23968821 | CSAR_peak_1 | 8.95,7.27,7.9  | + |
| chr5 | 23968880 | 23968927 | CSAR_peak_1 | 6.21,7.27      | + |
| chr5 | 23968972 | 23969048 | CSAR_peak_1 | 9.58,10.95     | + |
| chr5 | 23969138 | 23969180 | CSAR_peak_1 | 8.39           | + |
| chr5 | 23970130 | 23970244 | CSAR_peak_1 | 9.58,10.83     | + |
| chr5 | 23970559 | 23970622 | CSAR_peak_1 | 7.27           | + |
| chr5 | 24058768 | 24058820 | CSAR_peak_1 | 9.58           | + |
| chr5 | 24059042 | 24059103 | CSAR_peak_1 | 14.88          | + |
| chr5 | 24061513 | 24061587 | CSAR_peak_1 | 8.65           | + |
| chr5 | 24062897 | 24062961 | CSAR_peak_1 | 7.92           | + |
| chr5 | 24075190 | 24075243 | CSAR_peak_1 | 6.21           | + |
| chr5 | 24103052 | 24103121 | CSAR_peak_1 | 11.32,6.14     | + |
| chr5 | 24103136 | 24103182 | CSAR_peak_1 | 10.7,5.92      | + |
| chr5 | 24103229 | 24103311 | CSAR_peak_1 | 11.14,16.33    | + |
| chr5 | 24103372 | 24103490 | CSAR_peak_1 | 10.85,8.39,10. | + |
| chr5 | 24105899 | 24105923 | CSAR_peak_1 | 7.27           | + |
| chr5 | 24106783 | 24106824 | CSAR_peak_1 | 7.27           | + |
| chr5 | 24121156 | 24121252 | CSAR_peak_1 | 6.21,9.27      | + |
| chr5 | 24121478 | 24121584 | CSAR_peak_1 | 11.66,12.13    | + |
| chr5 | 24127554 | 24127611 | CSAR_peak_1 | 6.57           | + |
| chr5 | 24140710 | 24140746 | CSAR_peak_1 | 7.27,8.39      | + |
| chr5 | 24140894 | 24140982 | CSAR_peak_1 | 7.27,5.62      | + |
| chr5 | 24141115 | 24141170 | CSAR_peak_1 | 8.39           | + |
| chr5 | 24141172 | 24141235 | CSAR_peak_1 | 6.57,14.76,9.  | + |

|      |          |          |            |               |   |
|------|----------|----------|------------|---------------|---|
| chr5 | 24141330 | 24141420 | CSAR_peak_ | 28.34,16.34   | + |
| chr5 | 24141455 | 24141547 | CSAR_peak_ | 8.95,17.82    | + |
| chr5 | 24209328 | 24209369 | CSAR_peak_ | 6.57          | + |
| chr5 | 24228238 | 24228271 | CSAR_peak_ | 12.13         | + |
| chr5 | 24228537 | 24228584 | CSAR_peak_ | 8.39          | + |
| chr5 | 24229302 | 24229351 | CSAR_peak_ | 6.21,7.58     | + |
| chr5 | 24229706 | 24229764 | CSAR_peak_ | 9.58          | + |
| chr5 | 24231319 | 24231467 | CSAR_peak_ | 7.92,10.83    | + |
| chr5 | 24231902 | 24231945 | CSAR_peak_ | 6.03          | + |
| chr5 | 24231947 | 24231985 | CSAR_peak_ | 6.95          | + |
| chr5 | 24232220 | 24232279 | CSAR_peak_ | 6.44          | + |
| chr5 | 24232407 | 24232466 | CSAR_peak_ | 6.21          | + |
| chr5 | 24262549 | 24262581 | CSAR_peak_ | 6.21          | + |
| chr5 | 24266358 | 24266399 | CSAR_peak_ | 7.27          | + |
| chr5 | 24266463 | 24266537 | CSAR_peak_ | 6.21          | + |
| chr5 | 24266868 | 24266912 | CSAR_peak_ | 6.57          | + |
| chr5 | 24281300 | 24281347 | CSAR_peak_ | 7.27          | + |
| chr5 | 24281509 | 24281522 | CSAR_peak_ | 7.27          | + |
| chr5 | 24281526 | 24281565 | CSAR_peak_ | 10.83,7.27    | + |
| chr5 | 24281718 | 24281749 | CSAR_peak_ | 6.21          | + |
| chr5 | 24281884 | 24281932 | CSAR_peak_ | 7.73          | + |
| chr5 | 24282188 | 24282281 | CSAR_peak_ | 20.13,21.53   | + |
| chr5 | 24283343 | 24283399 | CSAR_peak_ | 6.57          | + |
| chr5 | 24283891 | 24283947 | CSAR_peak_ | 8.95          | + |
| chr5 | 24284584 | 24284699 | CSAR_peak_ | 9.58,6.57,8.6 | + |
| chr5 | 24289226 | 24289269 | CSAR_peak_ | 6.21          | + |
| chr5 | 24289606 | 24289688 | CSAR_peak_ | 10.95,8.39    | + |
| chr5 | 24289854 | 24289908 | CSAR_peak_ | 6.57          | + |
| chr5 | 24295139 | 24295173 | CSAR_peak_ | 10.02         | + |
| chr5 | 24295202 | 24295250 | CSAR_peak_ | 7.58,7.27     | + |
| chr5 | 24295518 | 24295550 | CSAR_peak_ | 7.27          | + |
| chr5 | 24296167 | 24296300 | CSAR_peak_ | 13.48         | + |
| chr5 | 24296464 | 24296493 | CSAR_peak_ | 13.48         | + |
| chr5 | 24296543 | 24296595 | CSAR_peak_ | 6.21          | + |
| chr5 | 24297257 | 24297302 | CSAR_peak_ | 12.6          | + |
| chr5 | 24297595 | 24297659 | CSAR_peak_ | 6.57,6.03     | + |
| chr5 | 24297694 | 24297742 | CSAR_peak_ | 6.58,8.65,7.8 | + |
| chr5 | 24297938 | 24297969 | CSAR_peak_ | 6.44          | + |
| chr5 | 24298916 | 24298935 | CSAR_peak_ | 6.57          | + |
| chr5 | 24299241 | 24299289 | CSAR_peak_ | 6.21          | + |
| chr5 | 24299297 | 24299337 | CSAR_peak_ | 6.1           | + |
| chr5 | 24299376 | 24299418 | CSAR_peak_ | 6.21          | + |

|      |          |          |            |               |   |
|------|----------|----------|------------|---------------|---|
| chr5 | 24300481 | 24300544 | CSAR_peak_ | 7.92,6.21     | + |
| chr5 | 24300943 | 24301004 | CSAR_peak_ | 12.13         | + |
| chr5 | 24302343 | 24302426 | CSAR_peak_ | 7.68          | + |
| chr5 | 24302853 | 24302886 | CSAR_peak_ | 9.58          | + |
| chr5 | 24340353 | 24340423 | CSAR_peak_ | 9.77          | + |
| chr5 | 24349119 | 24349152 | CSAR_peak_ | 6.21          | + |
| chr5 | 24349771 | 24349874 | CSAR_peak_ | 10.83         | + |
| chr5 | 24355347 | 24355389 | CSAR_peak_ | 8.39          | + |
| chr5 | 24355483 | 24355513 | CSAR_peak_ | 7.26          | + |
| chr5 | 24356219 | 24356264 | CSAR_peak_ | 8.39          | + |
| chr5 | 24358015 | 24358062 | CSAR_peak_ | 10.83         | + |
| chr5 | 24359127 | 24359166 | CSAR_peak_ | 6.21          | + |
| chr5 | 24359512 | 24359562 | CSAR_peak_ | 7.27          | + |
| chr5 | 24359847 | 24359888 | CSAR_peak_ | 9.77          | + |
| chr5 | 24360435 | 24360483 | CSAR_peak_ | 8.65          | + |
| chr5 | 24360587 | 24360651 | CSAR_peak_ | 6.57          | + |
| chr5 | 24360924 | 24360979 | CSAR_peak_ | 12.68         | + |
| chr5 | 24361098 | 24361192 | CSAR_peak_ | 7.92          | + |
| chr5 | 24361453 | 24361508 | CSAR_peak_ | 7.26          | + |
| chr5 | 24362546 | 24362560 | CSAR_peak_ | 7.27          | + |
| chr5 | 24362657 | 24362706 | CSAR_peak_ | 6.21          | + |
| chr5 | 24362783 | 24362868 | CSAR_peak_ | 12.17         | + |
| chr5 | 24363032 | 24363072 | CSAR_peak_ | 6.57          | + |
| chr5 | 24363170 | 24363208 | CSAR_peak_ | 7.58          | + |
| chr5 | 24386459 | 24386558 | CSAR_peak_ | 8.19,10.92    | + |
| chr5 | 24386600 | 24386644 | CSAR_peak_ | 6.57          | + |
| chr5 | 24386979 | 24387120 | CSAR_peak_ | 9.58,8.39     | + |
| chr5 | 24397935 | 24397965 | CSAR_peak_ | 7.27          | + |
| chr5 | 24398930 | 24398979 | CSAR_peak_ | 5.62,7.58     | + |
| chr5 | 24399268 | 24399286 | CSAR_peak_ | 6.21          | + |
| chr5 | 24400411 | 24400468 | CSAR_peak_ | 8.39          | + |
| chr5 | 24400553 | 24400580 | CSAR_peak_ | 7.27          | + |
| chr5 | 24480645 | 24480694 | CSAR_peak_ | 9.03          | + |
| chr5 | 24480794 | 24480903 | CSAR_peak_ | 8.39,7.27,7.5 | + |
| chr5 | 24482209 | 24482301 | CSAR_peak_ | 10.31         | + |
| chr5 | 24495611 | 24495663 | CSAR_peak_ | 12.13         | + |
| chr5 | 24496028 | 24496087 | CSAR_peak_ | 9.58          | + |
| chr5 | 24591383 | 24591429 | CSAR_peak_ | 10.83,5.62    | + |
| chr5 | 24593251 | 24593300 | CSAR_peak_ | 13.48         | + |
| chr5 | 24594586 | 24594639 | CSAR_peak_ | 12.17         | + |
| chr5 | 24598413 | 24598421 | CSAR_peak_ | 6.21          | + |
| chr5 | 24600029 | 24600059 | CSAR_peak_ | 6.21          | + |

|      |          |          |            |                  |   |
|------|----------|----------|------------|------------------|---|
| chr5 | 24600370 | 24600415 | CSAR_peak_ | 5.62,6.57        | + |
| chr5 | 24600597 | 24600654 | CSAR_peak_ | 5.62,6.95        | + |
| chr5 | 24600990 | 24601050 | CSAR_peak_ | 9.58             | + |
| chr5 | 24601154 | 24601222 | CSAR_peak_ | 8.95             | + |
| chr5 | 24602851 | 24602899 | CSAR_peak_ | 6.57             | + |
| chr5 | 24603282 | 24603339 | CSAR_peak_ | 10.95,10.95      | + |
| chr5 | 24611190 | 24611242 | CSAR_peak_ | 8.39             | + |
| chr5 | 24611805 | 24611844 | CSAR_peak_ | 6.21             | + |
| chr5 | 24624344 | 24624391 | CSAR_peak_ | 6.21             | + |
| chr5 | 24624443 | 24624501 | CSAR_peak_ | 10.83,14.88      | + |
| chr5 | 24624564 | 24624634 | CSAR_peak_ | 7.73,12.74,11.8  | + |
| chr5 | 24624685 | 24624734 | CSAR_peak_ | 8.39             | + |
| chr5 | 24624826 | 24624930 | CSAR_peak_ | 9.58,8.39        | + |
| chr5 | 24625170 | 24625240 | CSAR_peak_ | 6.03,6.45        | + |
| chr5 | 24630034 | 24630064 | CSAR_peak_ | 6.21             | + |
| chr5 | 24630140 | 24630212 | CSAR_peak_ | 5.62,6.21        | + |
| chr5 | 24630419 | 24630476 | CSAR_peak_ | 13.48,5.95       | + |
| chr5 | 24630661 | 24630714 | CSAR_peak_ | 7.73,9.03        | + |
| chr5 | 24630914 | 24630982 | CSAR_peak_ | 9.77             | + |
| chr5 | 24631868 | 24631946 | CSAR_peak_ | 7.13,8.65        | + |
| chr5 | 24632782 | 24632888 | CSAR_peak_ | 13.48            | + |
| chr5 | 24633431 | 24633483 | CSAR_peak_ | 6.21             | + |
| chr5 | 24675264 | 24675292 | CSAR_peak_ | 7.34             | + |
| chr5 | 24675335 | 24675382 | CSAR_peak_ | 9.84             | + |
| chr5 | 24675387 | 24675437 | CSAR_peak_ | 6.03,7.27        | + |
| chr5 | 24675955 | 24676004 | CSAR_peak_ | 15.2,10.95       | + |
| chr5 | 24676089 | 24676166 | CSAR_peak_ | 7.51,7.89        | + |
| chr5 | 24676499 | 24676578 | CSAR_peak_ | 17.35,8.65,6.21  | + |
| chr5 | 24676628 | 24676849 | CSAR_peak_ | 13.51,6.95,11.8  | + |
| chr5 | 24677037 | 24677091 | CSAR_peak_ | 7.27             | + |
| chr5 | 24677211 | 24677410 | CSAR_peak_ | 11.14,7.27,6.21  | + |
| chr5 | 24677418 | 24677467 | CSAR_peak_ | 6.57             | + |
| chr5 | 24677898 | 24678212 | CSAR_peak_ | 30.02,13.47,11.8 | + |
| chr5 | 24708438 | 24708485 | CSAR_peak_ | 6.95             | + |
| chr5 | 24742598 | 24742645 | CSAR_peak_ | 7.27             | + |
| chr5 | 24742647 | 24742691 | CSAR_peak_ | 12.54            | + |
| chr5 | 24742776 | 24742879 | CSAR_peak_ | 6.95,14.85       | + |
| chr5 | 24743185 | 24743212 | CSAR_peak_ | 7.58             | + |
| chr5 | 24743297 | 24743316 | CSAR_peak_ | 8.65             | + |
| chr5 | 24743401 | 24743496 | CSAR_peak_ | 9.77             | + |
| chr5 | 24743555 | 24743592 | CSAR_peak_ | 13.48            | + |
| chr5 | 24743684 | 24743729 | CSAR_peak_ | 8.13             | + |



|      |          |          |            |               |   |
|------|----------|----------|------------|---------------|---|
| chr5 | 24743824 | 24743890 | CSAR_peak_ | 8.52,6.03     | + |
| chr5 | 24743985 | 24744001 | CSAR_peak_ | 7.68          | + |
| chr5 | 24745466 | 24745506 | CSAR_peak_ | 8.39          | + |
| chr5 | 24784115 | 24784166 | CSAR_peak_ | 8.95          | + |
| chr5 | 24822510 | 24822574 | CSAR_peak_ | 10.95         | + |
| chr5 | 24822659 | 24822687 | CSAR_peak_ | 6.21          | + |
| chr5 | 24822733 | 24822790 | CSAR_peak_ | 7.7,16.19     | + |
| chr5 | 24822993 | 24823052 | CSAR_peak_ | 7.73,9.77     | + |
| chr5 | 24824027 | 24824132 | CSAR_peak_ | 5.79,7.26     | + |
| chr5 | 24824428 | 24824479 | CSAR_peak_ | 12.13,7.58    | + |
| chr5 | 24825095 | 24825132 | CSAR_peak_ | 9.58          | + |
| chr5 | 24825227 | 24825283 | CSAR_peak_ | 9.41          | + |
| chr5 | 24825499 | 24825518 | CSAR_peak_ | 7.27          | + |
| chr5 | 24825527 | 24825587 | CSAR_peak_ | 13.6,14.76    | + |
| chr5 | 24825836 | 24825894 | CSAR_peak_ | 13.48,6.21    | + |
| chr5 | 24826302 | 24826365 | CSAR_peak_ | 10.02,10.83   | + |
| chr5 | 24826404 | 24826504 | CSAR_peak_ | 7.92,8.65,15. | + |
| chr5 | 24826528 | 24826599 | CSAR_peak_ | 8.65          | + |
| chr5 | 24890338 | 24890387 | CSAR_peak_ | 8.39          | + |
| chr5 | 24910433 | 24910511 | CSAR_peak_ | 31.73         | + |
| chr5 | 24910545 | 24910640 | CSAR_peak_ | 6.53,6.52     | + |
| chr5 | 24910669 | 24910727 | CSAR_peak_ | 9.58          | + |
| chr5 | 24910761 | 24910799 | CSAR_peak_ | 7.06          | + |
| chr5 | 24910974 | 24911012 | CSAR_peak_ | 12.27         | + |
| chr5 | 24911158 | 24911199 | CSAR_peak_ | 7.68          | + |
| chr5 | 24911264 | 24911328 | CSAR_peak_ | 16.05         | + |
| chr5 | 24911390 | 24911440 | CSAR_peak_ | 8.28,8.65     | + |
| chr5 | 24911524 | 24911581 | CSAR_peak_ | 8.28,6.44     | + |
| chr5 | 24911731 | 24911784 | CSAR_peak_ | 8.13          | + |
| chr5 | 24911969 | 24912018 | CSAR_peak_ | 7.73          | + |
| chr5 | 24912051 | 24912145 | CSAR_peak_ | 7.92,6.21,6.2 | + |
| chr5 | 24912179 | 24912203 | CSAR_peak_ | 6.87          | + |
| chr5 | 24912267 | 24912323 | CSAR_peak_ | 8.65,8.18     | + |
| chr5 | 24912353 | 24912401 | CSAR_peak_ | 8.39          | + |
| chr5 | 24912592 | 24912712 | CSAR_peak_ | 13.66,5.62    | + |
| chr5 | 24912768 | 24912793 | CSAR_peak_ | 7.27          | + |
| chr5 | 24912797 | 24912859 | CSAR_peak_ | 7.29,8.65     | + |
| chr5 | 24912884 | 24912945 | CSAR_peak_ | 7.58          | + |
| chr5 | 24912946 | 24913031 | CSAR_peak_ | 6.57          | + |
| chr5 | 24913337 | 24913376 | CSAR_peak_ | 8.39          | + |
| chr5 | 24913744 | 24913783 | CSAR_peak_ | 6.95          | + |
| chr5 | 24913827 | 24913875 | CSAR_peak_ | 6.21          | + |

|      |          |          |              |                 |   |
|------|----------|----------|--------------|-----------------|---|
| chr5 | 24913986 | 24914079 | CSAR_peak_0  | 13.51           | + |
| chr5 | 24914119 | 24914137 | CSAR_peak_1  | 6.21            | + |
| chr5 | 24914228 | 24914256 | CSAR_peak_2  | 6.21            | + |
| chr5 | 24914352 | 24914431 | CSAR_peak_3  | 17.28,23.16     | + |
| chr5 | 24914533 | 24914602 | CSAR_peak_4  | 7.91            | + |
| chr5 | 24914655 | 24914756 | CSAR_peak_5  | 9.61,9.72       | + |
| chr5 | 24914807 | 24914848 | CSAR_peak_6  | 6.54            | + |
| chr5 | 24914988 | 24915048 | CSAR_peak_7  | 10.83           | + |
| chr5 | 24941535 | 24941601 | CSAR_peak_8  | 6.57            | + |
| chr5 | 25037548 | 25037583 | CSAR_peak_9  | 6.21            | + |
| chr5 | 25037775 | 25038089 | CSAR_peak_10 | 17.88,20.88,    | + |
| chr5 | 25040779 | 25040900 | CSAR_peak_11 | 13.51,9.58      | + |
| chr5 | 25040916 | 25040960 | CSAR_peak_12 | 8.39            | + |
| chr5 | 25040973 | 25041024 | CSAR_peak_13 | 9.32            | + |
| chr5 | 25041036 | 25041240 | CSAR_peak_14 | 8.66,11.74,11.8 | + |
| chr5 | 25066568 | 25066761 | CSAR_peak_15 | 34.81,7.92,7.9  | + |
| chr5 | 25075676 | 25075692 | CSAR_peak_16 | 9.58            | + |
| chr5 | 25075759 | 25075848 | CSAR_peak_17 | 7.27            | + |
| chr5 | 25076800 | 25076839 | CSAR_peak_18 | 7.34            | + |
| chr5 | 25098052 | 25098199 | CSAR_peak_19 | 9.1             | + |
| chr5 | 25098223 | 25098263 | CSAR_peak_20 | 6.87            | + |
| chr5 | 25098268 | 25098340 | CSAR_peak_21 | 6.02,11.01      | + |
| chr5 | 25098349 | 25098405 | CSAR_peak_22 | 21.72,9.54      | + |
| chr5 | 25098413 | 25098440 | CSAR_peak_23 | 16.08           | + |
| chr5 | 25098451 | 25098709 | CSAR_peak_24 | 6.13,9.4,21.3   | + |
| chr5 | 25098820 | 25098862 | CSAR_peak_25 | 6.21            | + |
| chr5 | 25098887 | 25099064 | CSAR_peak_26 | 7.92,6.85,21.1  | + |
| chr5 | 25099101 | 25099225 | CSAR_peak_27 | 10.02,16.59,    | + |
| chr5 | 25099513 | 25099586 | CSAR_peak_28 | 16.34,7.73      | + |
| chr5 | 25099769 | 25099863 | CSAR_peak_29 | 12.55,6.95      | + |
| chr5 | 25100074 | 25100204 | CSAR_peak_30 | 21.68,22.58     | + |
| chr5 | 25100315 | 25100380 | CSAR_peak_31 | 7.27            | + |
| chr5 | 25100405 | 25100447 | CSAR_peak_32 | 9.58            | + |
| chr5 | 25100611 | 25100675 | CSAR_peak_33 | 8.65            | + |
| chr5 | 25100925 | 25101008 | CSAR_peak_34 | 8.39            | + |
| chr5 | 25101101 | 25101183 | CSAR_peak_35 | 7.27            | + |
| chr5 | 25114367 | 25114466 | CSAR_peak_36 | 9.55,29.4,17.1  | + |
| chr5 | 25114542 | 25114590 | CSAR_peak_37 | 6.21            | + |
| chr5 | 25114604 | 25114653 | CSAR_peak_38 | 6.21            | + |
| chr5 | 25114805 | 25114852 | CSAR_peak_39 | 9.58            | + |
| chr5 | 25114949 | 25115051 | CSAR_peak_40 | 6.51,11.14      | + |
| chr5 | 25115127 | 25115194 | CSAR_peak_41 | 8.94,5.7,9.51   | + |

|      |          |          |            |               |   |
|------|----------|----------|------------|---------------|---|
| chr5 | 25115298 | 25115361 | CSAR_peak_ | 6.03          | + |
| chr5 | 25115444 | 25115542 | CSAR_peak_ | 6.03          | + |
| chr5 | 25115575 | 25115779 | CSAR_peak_ | 19.18,6.03,1  | + |
| chr5 | 25115970 | 25116096 | CSAR_peak_ | 7.27,10.18    | + |
| chr5 | 25116140 | 25116266 | CSAR_peak_ | 7.92,13.48,6. | + |
| chr5 | 25116283 | 25116461 | CSAR_peak_ | 19.36,9.79,2  | + |
| chr5 | 25116481 | 25116604 | CSAR_peak_ | 6.21,8.39     | + |
| chr5 | 25116619 | 25116993 | CSAR_peak_ | 5.95,13.48,2  | + |
| chr5 | 25117223 | 25117251 | CSAR_peak_ | 7.27          | + |
| chr5 | 25117698 | 25117750 | CSAR_peak_ | 8.39          | + |
| chr5 | 25118020 | 25118074 | CSAR_peak_ | 6.21,7.34     | + |
| chr5 | 25162023 | 25162111 | CSAR_peak_ | 8.39,16.11    | + |
| chr5 | 25202053 | 25202093 | CSAR_peak_ | 8.39          | + |
| chr5 | 25223210 | 25223268 | CSAR_peak_ | 8.39,8.39     | + |
| chr5 | 25223526 | 25223560 | CSAR_peak_ | 6.21          | + |
| chr5 | 25238405 | 25238470 | CSAR_peak_ | 14.88,8.39    | + |
| chr5 | 25323439 | 25323503 | CSAR_peak_ | 9.58,8.39     | + |
| chr5 | 25323531 | 25323604 | CSAR_peak_ | 6.95,6.21     | + |
| chr5 | 25323775 | 25323839 | CSAR_peak_ | 10.95         | + |
| chr5 | 25323859 | 25323925 | CSAR_peak_ | 12.17,6.21    | + |
| chr5 | 25346844 | 25346864 | CSAR_peak_ | 7.27          | + |
| chr5 | 25351002 | 25351040 | CSAR_peak_ | 8.39          | + |
| chr5 | 25449885 | 25449934 | CSAR_peak_ | 6.21          | + |
| chr5 | 25518681 | 25518740 | CSAR_peak_ | 9.72          | + |
| chr5 | 25518778 | 25518864 | CSAR_peak_ | 15.19,9.61,1  | + |
| chr5 | 25518880 | 25519308 | CSAR_peak_ | 29.69,14.93,  | + |
| chr5 | 25519315 | 25519398 | CSAR_peak_ | 19.36         | + |
| chr5 | 25519508 | 25519564 | CSAR_peak_ | 12.74         | + |
| chr5 | 25519571 | 25519732 | CSAR_peak_ | 17.68,13.35   | + |
| chr5 | 25519871 | 25519894 | CSAR_peak_ | 6.57          | + |
| chr5 | 25519927 | 25520263 | CSAR_peak_ | 6.85,30.44,2  | + |
| chr5 | 25520324 | 25520599 | CSAR_peak_ | 24.52,32.83,  | + |
| chr5 | 25520642 | 25520677 | CSAR_peak_ | 12.5          | + |
| chr5 | 25520683 | 25520721 | CSAR_peak_ | 7.23          | + |
| chr5 | 25520725 | 25520782 | CSAR_peak_ | 19.83,10.86   | + |
| chr5 | 25520796 | 25521079 | CSAR_peak_ | 16.79,17.88,  | + |
| chr5 | 25521184 | 25521197 | CSAR_peak_ | 16.95         | + |
| chr5 | 25521248 | 25521311 | CSAR_peak_ | 7.54,11.8     | + |
| chr5 | 25521470 | 25521838 | CSAR_peak_ | 9.61,17.4,13. | + |
| chr5 | 25521914 | 25522020 | CSAR_peak_ | 58.46,19.8,1  | + |
| chr5 | 25522054 | 25522294 | CSAR_peak_ | 7.27,6.38,18. | + |
| chr5 | 25522352 | 25522448 | CSAR_peak_ | 7.27          | + |

|      |          |          |             |                  |   |
|------|----------|----------|-------------|------------------|---|
| chr5 | 25522535 | 25522674 | CSAR_peak_1 | 25.08,21.35      | + |
| chr5 | 25522742 | 25522817 | CSAR_peak_1 | 8.39,6.87        | + |
| chr5 | 25522919 | 25522956 | CSAR_peak_1 | 7.27             | + |
| chr5 | 25523146 | 25523213 | CSAR_peak_1 | 16.33,8.13       | + |
| chr5 | 25523350 | 25523398 | CSAR_peak_1 | 16.11            | + |
| chr5 | 25523405 | 25523489 | CSAR_peak_1 | 8.65,7.27        | + |
| chr5 | 25523873 | 25523946 | CSAR_peak_1 | 9.61             | + |
| chr5 | 25524176 | 25524231 | CSAR_peak_1 | 14.88            | + |
| chr5 | 25524871 | 25524911 | CSAR_peak_1 | 7.58             | + |
| chr5 | 25525165 | 25525202 | CSAR_peak_1 | 10.95            | + |
| chr5 | 25525222 | 25525347 | CSAR_peak_1 | 9.27,6.57        | + |
| chr5 | 25525393 | 25525492 | CSAR_peak_1 | 7.34             | + |
| chr5 | 25525822 | 25526237 | CSAR_peak_1 | 8.39,16.25,10.83 | + |
| chr5 | 25526720 | 25526808 | CSAR_peak_1 | 10.83,9.58       | + |
| chr5 | 25526823 | 25526868 | CSAR_peak_1 | 8.39             | + |
| chr5 | 25526912 | 25527014 | CSAR_peak_1 | 13,17.75         | + |
| chr5 | 25532862 | 25532909 | CSAR_peak_1 | 10.83            | + |
| chr5 | 25533294 | 25533400 | CSAR_peak_1 | 8.52,12.27,6.21  | + |
| chr5 | 25534063 | 25534109 | CSAR_peak_1 | 9.77,6.21        | + |
| chr5 | 25534347 | 25534372 | CSAR_peak_1 | 6.21             | + |
| chr5 | 25534454 | 25534546 | CSAR_peak_1 | 8.39,7.27,9.77   | + |
| chr5 | 25534731 | 25534755 | CSAR_peak_1 | 8.65             | + |
| chr5 | 25534773 | 25534808 | CSAR_peak_1 | 9.58             | + |
| chr5 | 25534978 | 25535033 | CSAR_peak_1 | 9.97             | + |
| chr5 | 25537796 | 25537837 | CSAR_peak_1 | 8.39             | + |
| chr5 | 25538020 | 25538053 | CSAR_peak_1 | 7.27             | + |
| chr5 | 25538152 | 25538233 | CSAR_peak_1 | 5.62,11.38,10.83 | + |
| chr5 | 25538797 | 25538894 | CSAR_peak_1 | 8.39,6.95,7.27   | + |
| chr5 | 25539072 | 25539123 | CSAR_peak_1 | 12.31            | + |
| chr5 | 25539228 | 25539278 | CSAR_peak_1 | 8.28             | + |
| chr5 | 25539960 | 25540111 | CSAR_peak_1 | 13.48,5.62       | + |
| chr5 | 25540508 | 25540523 | CSAR_peak_1 | 6.21             | + |
| chr5 | 25540570 | 25540620 | CSAR_peak_1 | 10.83,6.85       | + |
| chr5 | 25540732 | 25540756 | CSAR_peak_1 | 6.21             | + |
| chr5 | 25540789 | 25540836 | CSAR_peak_1 | 6.57             | + |
| chr5 | 25540951 | 25540995 | CSAR_peak_1 | 5.62             | + |
| chr5 | 25541004 | 25541105 | CSAR_peak_1 | 9.77             | + |
| chr5 | 25541576 | 25541623 | CSAR_peak_1 | 6.03,6.95        | + |
| chr5 | 25541634 | 25541708 | CSAR_peak_1 | 8.39             | + |
| chr5 | 25564822 | 25564862 | CSAR_peak_1 | 6.03             | + |
| chr5 | 25610640 | 25610737 | CSAR_peak_1 | 7.34,10.83       | + |
| chr5 | 25611481 | 25611531 | CSAR_peak_1 | 7.27             | + |

|      |          |          |            |               |   |
|------|----------|----------|------------|---------------|---|
| chr5 | 25625612 | 25625684 | CSAR_peak_ | 13.48         | + |
| chr5 | 25627580 | 25627633 | CSAR_peak_ | 7.27          | + |
| chr5 | 25689497 | 25689546 | CSAR_peak_ | 9.58,6.57,7.7 | + |
| chr5 | 25689826 | 25689860 | CSAR_peak_ | 8.39          | + |
| chr5 | 25691621 | 25691679 | CSAR_peak_ | 9.58          | + |
| chr5 | 25704054 | 25704179 | CSAR_peak_ | 13.44,16.33   | + |
| chr5 | 25704235 | 25704319 | CSAR_peak_ | 12.13         | + |
| chr5 | 25704404 | 25704460 | CSAR_peak_ | 18.73         | + |
| chr5 | 25704480 | 25704556 | CSAR_peak_ | 10.48,11.43   | + |
| chr5 | 25704596 | 25704671 | CSAR_peak_ | 9.77          | + |
| chr5 | 25704673 | 25704714 | CSAR_peak_ | 6.21          | + |
| chr5 | 25704743 | 25704866 | CSAR_peak_ | 10.25,23.95,  | + |
| chr5 | 25704948 | 25705007 | CSAR_peak_ | 11.34         | + |
| chr5 | 25705050 | 25705132 | CSAR_peak_ | 7.91,18.95    | + |
| chr5 | 25705895 | 25705945 | CSAR_peak_ | 6.95          | + |
| chr5 | 25708273 | 25708325 | CSAR_peak_ | 8.39          | + |
| chr5 | 25708652 | 25708696 | CSAR_peak_ | 6.21          | + |
| chr5 | 25709099 | 25709419 | CSAR_peak_ | 20.43,7.27,6. | + |
| chr5 | 25709598 | 25709644 | CSAR_peak_ | 7.27          | + |
| chr5 | 25709680 | 25709766 | CSAR_peak_ | 6.21,8.39     | + |
| chr5 | 25709781 | 25709837 | CSAR_peak_ | 6.57          | + |
| chr5 | 25709857 | 25709965 | CSAR_peak_ | 10.62,9.79,6. | + |
| chr5 | 25710684 | 25710734 | CSAR_peak_ | 8.39          | + |
| chr5 | 25711481 | 25711542 | CSAR_peak_ | 6.21          | + |
| chr5 | 25711681 | 25711772 | CSAR_peak_ | 7.58,8.13     | + |
| chr5 | 25711785 | 25711844 | CSAR_peak_ | 8.39,10.83    | + |
| chr5 | 25713170 | 25713381 | CSAR_peak_ | 8.65,10.02,6. | + |
| chr5 | 25720051 | 25720085 | CSAR_peak_ | 6.03,8.65     | + |
| chr5 | 25720332 | 25720397 | CSAR_peak_ | 6.95          | + |
| chr5 | 25722308 | 25722392 | CSAR_peak_ | 6.21          | + |
| chr5 | 25727645 | 25727705 | CSAR_peak_ | 8.95,9.58     | + |
| chr5 | 25727803 | 25727863 | CSAR_peak_ | 8.39          | + |
| chr5 | 25729365 | 25729487 | CSAR_peak_ | 7.27,7.27     | + |
| chr5 | 25729510 | 25729577 | CSAR_peak_ | 10.02         | + |
| chr5 | 25729597 | 25729650 | CSAR_peak_ | 6.02          | + |
| chr5 | 25729774 | 25729855 | CSAR_peak_ | 7.27,6.57     | + |
| chr5 | 25729911 | 25729987 | CSAR_peak_ | 9.32,13.48,5. | + |
| chr5 | 25730082 | 25730165 | CSAR_peak_ | 10.02         | + |
| chr5 | 25743987 | 25744048 | CSAR_peak_ | 12.13,12.31,  | + |
| chr5 | 25744195 | 25744206 | CSAR_peak_ | 7.58          | + |
| chr5 | 25748913 | 25748944 | CSAR_peak_ | 12.31         | + |
| chr5 | 25752395 | 25752473 | CSAR_peak_ | 10.83,12.13   | + |

|      |          |          |            |               |   |
|------|----------|----------|------------|---------------|---|
| chr5 | 25767590 | 25767614 | CSAR_peak_ | 7.27          | + |
| chr5 | 25767644 | 25767659 | CSAR_peak_ | 6.44          | + |
| chr5 | 25768002 | 25768060 | CSAR_peak_ | 12.27         | + |
| chr5 | 25768748 | 25768798 | CSAR_peak_ | 9.77,6.95     | + |
| chr5 | 25780948 | 25781002 | CSAR_peak_ | 6.95          | + |
| chr5 | 25882816 | 25882868 | CSAR_peak_ | 11.63         | + |
| chr5 | 25883187 | 25883227 | CSAR_peak_ | 10.02         | + |
| chr5 | 25883423 | 25883480 | CSAR_peak_ | 10.83,9.27    | + |
| chr5 | 25883494 | 25883528 | CSAR_peak_ | 6.57          | + |
| chr5 | 25883601 | 25883656 | CSAR_peak_ | 11.63,6.1     | + |
| chr5 | 25883844 | 25883904 | CSAR_peak_ | 9.03          | + |
| chr5 | 25884067 | 25884104 | CSAR_peak_ | 7.92          | + |
| chr5 | 25884110 | 25884183 | CSAR_peak_ | 5.95          | + |
| chr5 | 25884464 | 25884517 | CSAR_peak_ | 7.34          | + |
| chr5 | 25884700 | 25884733 | CSAR_peak_ | 10.95         | + |
| chr5 | 25884758 | 25884827 | CSAR_peak_ | 6.21,6.95     | + |
| chr5 | 25884872 | 25884877 | CSAR_peak_ | 5.79          | + |
| chr5 | 25884953 | 25885018 | CSAR_peak_ | 7.35,6.37     | + |
| chr5 | 25885107 | 25885159 | CSAR_peak_ | 14.92,7.29    | + |
| chr5 | 25885241 | 25885338 | CSAR_peak_ | 7.27,6.57     | + |
| chr5 | 25886079 | 25886146 | CSAR_peak_ | 6.21          | + |
| chr5 | 25886177 | 25886258 | CSAR_peak_ | 9.58          | + |
| chr5 | 25886474 | 25886522 | CSAR_peak_ | 13.48         | + |
| chr5 | 25892936 | 25893017 | CSAR_peak_ | 10.83         | + |
| chr5 | 25893026 | 25893068 | CSAR_peak_ | 8.28          | + |
| chr5 | 25921542 | 25921603 | CSAR_peak_ | 9.58          | + |
| chr5 | 25921826 | 25921958 | CSAR_peak_ | 12.13,5.9     | + |
| chr5 | 25922032 | 25922082 | CSAR_peak_ | 6.21          | + |
| chr5 | 25922193 | 25922230 | CSAR_peak_ | 6.21          | + |
| chr5 | 25922488 | 25922507 | CSAR_peak_ | 6.21          | + |
| chr5 | 25922938 | 25923009 | CSAR_peak_ | 12.17,6.57,14 | + |
| chr5 | 25951684 | 25951726 | CSAR_peak_ | 7.92          | + |
| chr5 | 25951878 | 25951924 | CSAR_peak_ | 13.51         | + |
| chr5 | 25952535 | 25952564 | CSAR_peak_ | 5.62          | + |
| chr5 | 25952881 | 25952910 | CSAR_peak_ | 8.39          | + |
| chr5 | 25953290 | 25953332 | CSAR_peak_ | 7.58          | + |
| chr5 | 25955415 | 25955461 | CSAR_peak_ | 6.95          | + |
| chr5 | 25955575 | 25955610 | CSAR_peak_ | 7.27          | + |
| chr5 | 25956006 | 25956088 | CSAR_peak_ | 8.39,7.27     | + |
| chr5 | 25956214 | 25956270 | CSAR_peak_ | 8.65          | + |
| chr5 | 25957166 | 25957227 | CSAR_peak_ | 6.21,10.83    | + |
| chr5 | 25957325 | 25957379 | CSAR_peak_ | 13.48,7.27    | + |

|      |          |          |             |               |   |
|------|----------|----------|-------------|---------------|---|
| chr5 | 25957558 | 25957608 | CSAR_peak_0 | 8.39          | + |
| chr5 | 25970779 | 25970818 | CSAR_peak_0 | 8.65          | + |
| chr5 | 25970921 | 25970982 | CSAR_peak_0 | 11.66,13.51   | + |
| chr5 | 25971105 | 25971138 | CSAR_peak_0 | 6.21          | + |
| chr5 | 25982349 | 25982397 | CSAR_peak_0 | 13.44         | + |
| chr5 | 25982559 | 25982600 | CSAR_peak_0 | 12.31         | + |
| chr5 | 25984681 | 25984739 | CSAR_peak_0 | 7.2           | + |
| chr5 | 25984941 | 25985020 | CSAR_peak_0 | 13.51,7.7     | + |
| chr5 | 25985136 | 25985189 | CSAR_peak_0 | 6.31,8.99     | + |
| chr5 | 25986057 | 25986098 | CSAR_peak_0 | 8.39          | + |
| chr5 | 25987639 | 25987706 | CSAR_peak_0 | 8.39,5.62     | + |
| chr5 | 25989671 | 25989729 | CSAR_peak_0 | 7.27          | + |
| chr5 | 25989942 | 25989983 | CSAR_peak_0 | 6.21          | + |
| chr5 | 25990126 | 25990184 | CSAR_peak_0 | 8.39,13.51,6. | + |
| chr5 | 25990284 | 25990326 | CSAR_peak_0 | 12.35,15.2,9. | + |
| chr5 | 25990601 | 25990656 | CSAR_peak_0 | 6.21,13.92,7. | + |
| chr5 | 25990964 | 25990981 | CSAR_peak_0 | 6.95          | + |
| chr5 | 26059016 | 26059080 | CSAR_peak_0 | 6.64,11.66    | + |
| chr5 | 26059141 | 26059200 | CSAR_peak_0 | 6.21          | + |
| chr5 | 26059353 | 26059388 | CSAR_peak_0 | 7.58          | + |
| chr5 | 26059503 | 26059539 | CSAR_peak_0 | 9.27          | + |
| chr5 | 26059640 | 26059701 | CSAR_peak_0 | 23.82         | + |
| chr5 | 26059789 | 26059980 | CSAR_peak_0 | 9.27,12.17,8. | + |
| chr5 | 26059985 | 26060145 | CSAR_peak_0 | 8.92,7.78,9.7 | + |
| chr5 | 26060307 | 26060384 | CSAR_peak_0 | 7.27          | + |
| chr5 | 26060483 | 26060523 | CSAR_peak_0 | 7.27          | + |
| chr5 | 26060597 | 26060661 | CSAR_peak_0 | 7.58,9.03     | + |
| chr5 | 26060877 | 26060922 | CSAR_peak_0 | 7.27          | + |
| chr5 | 26092279 | 26092321 | CSAR_peak_0 | 9.58          | + |
| chr5 | 26092437 | 26092489 | CSAR_peak_0 | 6.21          | + |
| chr5 | 26093509 | 26093568 | CSAR_peak_0 | 6.21          | + |
| chr5 | 26154341 | 26154374 | CSAR_peak_0 | 6.21          | + |
| chr5 | 26155630 | 26155673 | CSAR_peak_0 | 6.21          | + |
| chr5 | 26156465 | 26156516 | CSAR_peak_0 | 8.39,5.62,6.9 | + |
| chr5 | 26156784 | 26156839 | CSAR_peak_0 | 6.21          | + |
| chr5 | 26172578 | 26172620 | CSAR_peak_0 | 7.92          | + |
| chr5 | 26172774 | 26172861 | CSAR_peak_0 | 19.94,11.75   | + |
| chr5 | 26172943 | 26173022 | CSAR_peak_0 | 27.64,7.27    | + |
| chr5 | 26173084 | 26173180 | CSAR_peak_0 | 9.27,18.9     | + |
| chr5 | 26173250 | 26173380 | CSAR_peak_0 | 13.85         | + |
| chr5 | 26173693 | 26173746 | CSAR_peak_0 | 6.57,6.95     | + |
| chr5 | 26173932 | 26174089 | CSAR_peak_0 | 25.18,16.05   | + |

|      |          |          |             |               |   |
|------|----------|----------|-------------|---------------|---|
| chr5 | 26174161 | 26174260 | CSAR_peak_1 | 8.39,8.39     | + |
| chr5 | 26174294 | 26174410 | CSAR_peak_1 | 12.13,10.95   | + |
| chr5 | 26174447 | 26174557 | CSAR_peak_1 | 7.58,7.68     | + |
| chr5 | 26174776 | 26174864 | CSAR_peak_1 | 11.69,10.36   | + |
| chr5 | 26179744 | 26179866 | CSAR_peak_1 | 7.27,7.27     | + |
| chr5 | 26180012 | 26180073 | CSAR_peak_1 | 8.39          | + |
| chr5 | 26180617 | 26180682 | CSAR_peak_1 | 5.95,6.03     | + |
| chr5 | 26222532 | 26222589 | CSAR_peak_1 | 14.88         | + |
| chr5 | 26223640 | 26223683 | CSAR_peak_1 | 8.65          | + |
| chr5 | 26224225 | 26224262 | CSAR_peak_1 | 6.21          | + |
| chr5 | 26255100 | 26255134 | CSAR_peak_1 | 7.27          | + |
| chr5 | 26255424 | 26255471 | CSAR_peak_1 | 5.62          | + |
| chr5 | 26255534 | 26255581 | CSAR_peak_1 | 13.85         | + |
| chr5 | 26255734 | 26255796 | CSAR_peak_1 | 10.62,8.13    | + |
| chr5 | 26256064 | 26256105 | CSAR_peak_1 | 7.7           | + |
| chr5 | 26309895 | 26309940 | CSAR_peak_1 | 8.95,7.58     | + |
| chr5 | 26312347 | 26312408 | CSAR_peak_1 | 12.31,13.44   | + |
| chr5 | 26312839 | 26312890 | CSAR_peak_1 | 6.95          | + |
| chr5 | 26313071 | 26313110 | CSAR_peak_1 | 9.58          | + |
| chr5 | 26313232 | 26313266 | CSAR_peak_1 | 6.21          | + |
| chr5 | 26313464 | 26313549 | CSAR_peak_1 | 6.21          | + |
| chr5 | 26313729 | 26313866 | CSAR_peak_1 | 13.44,7.27    | + |
| chr5 | 26314134 | 26314222 | CSAR_peak_1 | 16.08,8.65    | + |
| chr5 | 26314385 | 26314453 | CSAR_peak_1 | 7.34,6.44     | + |
| chr5 | 26314532 | 26314635 | CSAR_peak_1 | 9.77,6.21     | + |
| chr5 | 26314956 | 26315037 | CSAR_peak_1 | 6.57          | + |
| chr5 | 26369392 | 26369459 | CSAR_peak_1 | 8.95          | + |
| chr5 | 26381141 | 26381196 | CSAR_peak_1 | 6.95          | + |
| chr5 | 26386988 | 26387086 | CSAR_peak_1 | 6.21,8.39     | + |
| chr5 | 26410556 | 26410646 | CSAR_peak_1 | 7.92          | + |
| chr5 | 26410732 | 26410758 | CSAR_peak_1 | 7.27          | + |
| chr5 | 26410807 | 26410860 | CSAR_peak_1 | 5.62          | + |
| chr5 | 26410915 | 26410968 | CSAR_peak_1 | 8.39          | + |
| chr5 | 26411575 | 26411621 | CSAR_peak_1 | 10.95,7.73    | + |
| chr5 | 26420102 | 26420211 | CSAR_peak_1 | 14.88,30.16,  | + |
| chr5 | 26420305 | 26420349 | CSAR_peak_1 | 9.58          | + |
| chr5 | 26421357 | 26421405 | CSAR_peak_1 | 6.57          | + |
| chr5 | 26422129 | 26422171 | CSAR_peak_1 | 6.21          | + |
| chr5 | 26422706 | 26422744 | CSAR_peak_1 | 6.57,6.03     | + |
| chr5 | 26422784 | 26422853 | CSAR_peak_1 | 7.27          | + |
| chr5 | 26422854 | 26422941 | CSAR_peak_1 | 8.39,9.77,6.2 | + |
| chr5 | 26423360 | 26423413 | CSAR_peak_1 | 6.21          | + |



|      |          |          |            |               |   |
|------|----------|----------|------------|---------------|---|
| chr5 | 26423533 | 26423575 | CSAR_peak_ | 6.21          | + |
| chr5 | 26424066 | 26424158 | CSAR_peak_ | 12.13         | + |
| chr5 | 26424186 | 26424264 | CSAR_peak_ | 9.58          | + |
| chr5 | 26424803 | 26424876 | CSAR_peak_ | 6.21          | + |
| chr5 | 26425088 | 26425130 | CSAR_peak_ | 8.65          | + |
| chr5 | 26427246 | 26427289 | CSAR_peak_ | 10.83         | + |
| chr5 | 26428617 | 26428678 | CSAR_peak_ | 6.44          | + |
| chr5 | 26428960 | 26428985 | CSAR_peak_ | 7.27          | + |
| chr5 | 26429106 | 26429208 | CSAR_peak_ | 17.82,7.58,6. | + |
| chr5 | 26429572 | 26429637 | CSAR_peak_ | 5.62          | + |
| chr5 | 26435762 | 26435832 | CSAR_peak_ | 6.21          | + |
| chr5 | 26446661 | 26446705 | CSAR_peak_ | 13.48,8.39    | + |
| chr5 | 26446774 | 26446854 | CSAR_peak_ | 14.88,9.58    | + |
| chr5 | 26448049 | 26448097 | CSAR_peak_ | 11.14         | + |
| chr5 | 26448297 | 26448372 | CSAR_peak_ | 7.34          | + |
| chr5 | 26567369 | 26567458 | CSAR_peak_ | 27.33,6.14,9. | + |
| chr5 | 26567519 | 26567609 | CSAR_peak_ | 11.86,12.79,! | + |
| chr5 | 26567660 | 26567735 | CSAR_peak_ | 46.06,30.54   | + |
| chr5 | 26569855 | 26569899 | CSAR_peak_ | 10.02         | + |
| chr5 | 26570038 | 26570088 | CSAR_peak_ | 7.36          | + |
| chr5 | 26570147 | 26570182 | CSAR_peak_ | 10.95         | + |
| chr5 | 26589621 | 26589721 | CSAR_peak_ | 9.58          | + |
| chr5 | 26589869 | 26589913 | CSAR_peak_ | 8.39          | + |
| chr5 | 26656457 | 26656493 | CSAR_peak_ | 6.03          | + |
| chr5 | 26656536 | 26656610 | CSAR_peak_ | 7.58,8.39     | + |
| chr5 | 26656947 | 26656990 | CSAR_peak_ | 5.62          | + |
| chr5 | 26710750 | 26710803 | CSAR_peak_ | 6.21          | + |
| chr5 | 26711138 | 26711196 | CSAR_peak_ | 13.51         | + |
| chr5 | 26711237 | 26711277 | CSAR_peak_ | 5.62          | + |
| chr5 | 26711376 | 26711393 | CSAR_peak_ | 6.21          | + |
| chr5 | 26711423 | 26711496 | CSAR_peak_ | 17.51         | + |
| chr5 | 26711698 | 26711772 | CSAR_peak_ | 8.02,13.29    | + |
| chr5 | 26711935 | 26712002 | CSAR_peak_ | 13.44         | + |
| chr5 | 26712117 | 26712190 | CSAR_peak_ | 7.58          | + |
| chr5 | 26712480 | 26712613 | CSAR_peak_ | 8.12,7.27     | + |
| chr5 | 26724832 | 26724878 | CSAR_peak_ | 10.83,6.21    | + |
| chr5 | 26725987 | 26726035 | CSAR_peak_ | 8.65,6.95     | + |
| chr5 | 26726075 | 26726125 | CSAR_peak_ | 6.57          | + |
| chr5 | 26726637 | 26726721 | CSAR_peak_ | 16.11,5.62,9. | + |
| chr5 | 26727024 | 26727069 | CSAR_peak_ | 7.27          | + |
| chr5 | 26727156 | 26727202 | CSAR_peak_ | 10.02         | + |
| chr5 | 26734478 | 26734532 | CSAR_peak_ | 8.39          | + |

|      |          |          |             |               |   |
|------|----------|----------|-------------|---------------|---|
| chr5 | 26793256 | 26793325 | CSAR_peak_1 | 9.58          | + |
| chr5 | 26854061 | 26854190 | CSAR_peak_1 | 17.75,9.02    | + |
| chr5 | 26854221 | 26854265 | CSAR_peak_1 | 7.73          | + |
| chr5 | 26854373 | 26854440 | CSAR_peak_1 | 16            | + |
| chr5 | 26854699 | 26854764 | CSAR_peak_1 | 14.88         | + |
| chr5 | 26854862 | 26854944 | CSAR_peak_1 | 31.72,11.85   | + |
| chr5 | 26855008 | 26855079 | CSAR_peak_1 | 25.91,6.92,9. | + |
| chr5 | 26855092 | 26855200 | CSAR_peak_1 | 8.3,26,13.72  | + |
| chr5 | 26855317 | 26855391 | CSAR_peak_1 | 7.92,12.31    | + |
| chr5 | 26855695 | 26855766 | CSAR_peak_1 | 8.65,7.29     | + |
| chr5 | 26855832 | 26855882 | CSAR_peak_1 | 15            | + |
| chr5 | 26856345 | 26856389 | CSAR_peak_1 | 7.27          | + |
| chr5 | 26856565 | 26856619 | CSAR_peak_1 | 9.58          | + |
| chr5 | 26856832 | 26856883 | CSAR_peak_1 | 13.44,12.74   | + |
| chr5 | 26856890 | 26856940 | CSAR_peak_1 | 7.27          | + |
| chr5 | 26856972 | 26857073 | CSAR_peak_1 | 6.03,7.27     | + |
| chr5 | 26857230 | 26857346 | CSAR_peak_1 | 7.73,13.44    | + |
| chr5 | 26857350 | 26857404 | CSAR_peak_1 | 8.28,6.21     | + |
| chr5 | 26857434 | 26857488 | CSAR_peak_1 | 8.39          | + |
| chr5 | 26857610 | 26857668 | CSAR_peak_1 | 11.14         | + |
| chr5 | 26857802 | 26857888 | CSAR_peak_1 | 8.39,8.95     | + |
| chr5 | 26858016 | 26858042 | CSAR_peak_1 | 6.21          | + |
| chr5 | 26858052 | 26858118 | CSAR_peak_1 | 17.4          | + |
| chr5 | 26858147 | 26858408 | CSAR_peak_1 | 31.19,40.68   | + |
| chr5 | 26858446 | 26858499 | CSAR_peak_1 | 13.29         | + |
| chr5 | 26858503 | 26858666 | CSAR_peak_1 | 8.65,18.61,1! | + |
| chr5 | 26858794 | 26858811 | CSAR_peak_1 | 5.62          | + |
| chr5 | 26858814 | 26858864 | CSAR_peak_1 | 7.27,10.62    | + |
| chr5 | 26858920 | 26859048 | CSAR_peak_1 | 10.17,6.94    | + |
| chr5 | 26859117 | 26859181 | CSAR_peak_1 | 6.21,8.65,6.0 | + |
| chr5 | 26859193 | 26859295 | CSAR_peak_1 | 10.52,6.71,7. | + |
| chr5 | 26859721 | 26859798 | CSAR_peak_1 | 25.18,34.16   | + |
| chr5 | 26859856 | 26860007 | CSAR_peak_1 | 10.96,10.58   | + |
| chr5 | 26860108 | 26860205 | CSAR_peak_1 | 8.65,6.87,8.6 | + |
| chr5 | 26860269 | 26860331 | CSAR_peak_1 | 9.41,10.95    | + |
| chr5 | 26860426 | 26860500 | CSAR_peak_1 | 12.52,7.58    | + |
| chr5 | 26860558 | 26860645 | CSAR_peak_1 | 8.5,17.68     | + |
| chr5 | 26860672 | 26860787 | CSAR_peak_1 | 9.58,7.2,22.5 | + |
| chr5 | 26860834 | 26860864 | CSAR_peak_1 | 7.26          | + |
| chr5 | 26860907 | 26860936 | CSAR_peak_1 | 6.03          | + |
| chr5 | 26861116 | 26861175 | CSAR_peak_1 | 46.67,9.58    | + |
| chr5 | 26861723 | 26861779 | CSAR_peak_1 | 9.58          | + |

|      |          |          |             |                 |   |
|------|----------|----------|-------------|-----------------|---|
| chr5 | 26861783 | 26861996 | CSAR_peak_1 | 6.03,6.51,8.3   | + |
| chr5 | 26862198 | 26862246 | CSAR_peak_1 | 6.57            | + |
| chr5 | 26935221 | 26935256 | CSAR_peak_1 | 6.95            | + |
| chr5 | 26936676 | 26936721 | CSAR_peak_1 | 6.21            | + |
| chr5 | 26936956 | 26936997 | CSAR_peak_1 | 7.27            | + |
| chr5 | 26949673 | 26949856 | CSAR_peak_1 | 97.41,6.21,6.   | + |
| chr5 | 26951093 | 26951139 | CSAR_peak_1 | 6.21            | + |
| chr5 | 26951226 | 26951307 | CSAR_peak_1 | 12.13           | + |
| chr5 | 26951438 | 26951461 | CSAR_peak_1 | 6.21            | + |
| chr5 | 26951547 | 26951615 | CSAR_peak_1 | 7.27            | + |
| chr5 | 26952487 | 26952614 | CSAR_peak_1 | 12.17,7.06      | + |
| chr5 | 26952616 | 26952762 | CSAR_peak_1 | 7.27,18.65,14.  | + |
| chr5 | 26952778 | 26952878 | CSAR_peak_1 | 13.51,8.9       | + |
| chr5 | 26952885 | 26952920 | CSAR_peak_1 | 7.34            | + |
| chr5 | 26952979 | 26953041 | CSAR_peak_1 | 13.66           | + |
| chr5 | 26953044 | 26953095 | CSAR_peak_1 | 6.64            | + |
| chr5 | 26953392 | 26953440 | CSAR_peak_1 | 6.21            | + |
| chr5 | 26953505 | 26953659 | CSAR_peak_1 | 14.88,6.03,10.  | + |
| chr5 | 26953823 | 26953893 | CSAR_peak_1 | 16.33           | + |
| chr5 | 26954034 | 26954087 | CSAR_peak_1 | 6.57            | + |
| chr5 | 26954209 | 26954248 | CSAR_peak_1 | 6.85            | + |
| chr5 | 26954432 | 26954477 | CSAR_peak_1 | 13.51           | + |
| chr5 | 26954598 | 26954657 | CSAR_peak_1 | 8.65            | + |
| chr5 | 26954703 | 26954753 | CSAR_peak_1 | 8.39            | + |
| chr5 | 26955345 | 26955410 | CSAR_peak_1 | 9.58,10.83      | + |
| chr5 | 1929     | 1962     | CSAR_peak_1 | 7.26            | - |
| chr5 | 2435     | 2510     | CSAR_peak_1 | 8.95,7,7.27     | - |
| chr5 | 2748     | 2766     | CSAR_peak_1 | 14.88           | - |
| chr5 | 2771     | 2800     | CSAR_peak_1 | 12.35           | - |
| chr5 | 2872     | 2900     | CSAR_peak_1 | 11.63           | - |
| chr5 | 3624     | 3660     | CSAR_peak_1 | 6.14            | - |
| chr5 | 3762     | 3803     | CSAR_peak_1 | 8.65,7.58       | - |
| chr5 | 3989     | 4006     | CSAR_peak_1 | 5.86            | - |
| chr5 | 4102     | 4158     | CSAR_peak_1 | 14.22,11.14,10. | - |
| chr5 | 4335     | 4427     | CSAR_peak_1 | 8.39,6.21       | - |
| chr5 | 6689     | 6737     | CSAR_peak_1 | 7.27            | - |
| chr5 | 7212     | 7305     | CSAR_peak_1 | 6.21            | - |
| chr5 | 12280    | 12323    | CSAR_peak_1 | 7.27            | - |
| chr5 | 13219    | 13282    | CSAR_peak_1 | 7.58            | - |
| chr5 | 13400    | 13543    | CSAR_peak_1 | 12.74,13.85     | - |
| chr5 | 13580    | 13646    | CSAR_peak_1 | 12.59           | - |
| chr5 | 13688    | 13767    | CSAR_peak_1 | 12.74           | - |

|      |        |                    |               |   |
|------|--------|--------------------|---------------|---|
| chr5 | 13809  | 13861 CSAR_peak_   | 9.58          | - |
| chr5 | 13864  | 14023 CSAR_peak_   | 38.23,34.08   | - |
| chr5 | 14070  | 14156 CSAR_peak_   | 11.38         | - |
| chr5 | 14298  | 14429 CSAR_peak_   | 12.13,10.83   | - |
| chr5 | 14431  | 14693 CSAR_peak_   | 32.27,23.95   | - |
| chr5 | 14764  | 14901 CSAR_peak_   | 17.68,17.82,  | - |
| chr5 | 15239  | 15381 CSAR_peak_   | 24.82,17.52   | - |
| chr5 | 15408  | 15456 CSAR_peak_   | 10.02         | - |
| chr5 | 15570  | 15909 CSAR_peak_   | 29.4,11.14,2! | - |
| chr5 | 16044  | 16085 CSAR_peak_   | 9.77          | - |
| chr5 | 18231  | 18288 CSAR_peak_   | 7.27,7.27     | - |
| chr5 | 18568  | 18622 CSAR_peak_   | 6.21          | - |
| chr5 | 19254  | 19302 CSAR_peak_   | 6.21          | - |
| chr5 | 19631  | 19689 CSAR_peak_   | 8.28          | - |
| chr5 | 20455  | 20510 CSAR_peak_   | 9.58          | - |
| chr5 | 35092  | 35134 CSAR_peak_   | 6.45          | - |
| chr5 | 35228  | 35332 CSAR_peak_   | 9.61,6.21     | - |
| chr5 | 35436  | 35485 CSAR_peak_   | 16.33         | - |
| chr5 | 35654  | 35705 CSAR_peak_   | 8.65          | - |
| chr5 | 35787  | 35834 CSAR_peak_   | 6.21          | - |
| chr5 | 36510  | 36568 CSAR_peak_   | 6.21          | - |
| chr5 | 36656  | 36726 CSAR_peak_   | 16.33,21.22   | - |
| chr5 | 37721  | 37763 CSAR_peak_   | 6.21          | - |
| chr5 | 86878  | 86955 CSAR_peak_   | 12.31         | - |
| chr5 | 87084  | 87163 CSAR_peak_   | 14.51,10.18   | - |
| chr5 | 87494  | 87525 CSAR_peak_   | 6.21          | - |
| chr5 | 87590  | 87631 CSAR_peak_   | 14.88,7.26    | - |
| chr5 | 87724  | 87781 CSAR_peak_   | 13.48         | - |
| chr5 | 87846  | 87936 CSAR_peak_   | 22.52,5.86,1! | - |
| chr5 | 88027  | 88062 CSAR_peak_   | 14.08,9.58    | - |
| chr5 | 88701  | 88773 CSAR_peak_   | 9.58          | - |
| chr5 | 88881  | 88963 CSAR_peak_   | 7.27,5.86,16. | - |
| chr5 | 108458 | 108506 CSAR_peak_  | 12.31         | - |
| chr5 | 110133 | 110182 CSAR_peak_  | 8.39,9.58     | - |
| chr5 | 111310 | 111387 CSAR_peak_  | 26.69         | - |
| chr5 | 111475 | 111546 CSAR_peak_  | 8.39,6.95     | - |
| chr5 | 142406 | 142490 CSAR_peak_! | 15.77,27.78,  | - |
| chr5 | 142548 | 142590 CSAR_peak_! | 6.11,9.78     | - |
| chr5 | 142603 | 142636 CSAR_peak_! | 7.68          | - |
| chr5 | 146117 | 146172 CSAR_peak_  | 9.58,9.58     | - |
| chr5 | 146299 | 146405 CSAR_peak_  | 68.02,25.8,6! | - |
| chr5 | 146621 | 146750 CSAR_peak_! | 8.62,21.86,2! | - |

|      |        |        |            |               |   |
|------|--------|--------|------------|---------------|---|
| chr5 | 160844 | 160934 | CSAR_peak_ | 6.21,7.27     | - |
| chr5 | 163374 | 163436 | CSAR_peak_ | 14.88,7.58    | - |
| chr5 | 164295 | 164335 | CSAR_peak_ | 7.27          | - |
| chr5 | 165790 | 165846 | CSAR_peak_ | 7.27          | - |
| chr5 | 166265 | 166361 | CSAR_peak_ | 12.13,10.02   | - |
| chr5 | 166670 | 166699 | CSAR_peak_ | 8.92          | - |
| chr5 | 166988 | 167049 | CSAR_peak_ | 14.88,14.88   | - |
| chr5 | 167745 | 167765 | CSAR_peak_ | 6.03          | - |
| chr5 | 168701 | 168779 | CSAR_peak_ | 8.14,12.13,1  | - |
| chr5 | 170396 | 170453 | CSAR_peak_ | 22.56,9.58    | - |
| chr5 | 170870 | 170906 | CSAR_peak_ | 12.13         | - |
| chr5 | 172980 | 173063 | CSAR_peak_ | 9.58          | - |
| chr5 | 184077 | 184155 | CSAR_peak_ | 17.82         | - |
| chr5 | 184819 | 184888 | CSAR_peak_ | 9.58          | - |
| chr5 | 185025 | 185074 | CSAR_peak_ | 9.58          | - |
| chr5 | 227998 | 228193 | CSAR_peak_ | 16.33,13.48,; | - |
| chr5 | 228236 | 228506 | CSAR_peak_ | 44.3,7.29,24. | - |
| chr5 | 228590 | 228668 | CSAR_peak_ | 14.88,27.64   | - |
| chr5 | 228753 | 228914 | CSAR_peak_ | 37.06,12.54,; | - |
| chr5 | 228955 | 228993 | CSAR_peak_ | 8.3           | - |
| chr5 | 228997 | 229016 | CSAR_peak_ | 9.68          | - |
| chr5 | 229102 | 229165 | CSAR_peak_ | 13.06,28.69   | - |
| chr5 | 229175 | 229228 | CSAR_peak_ | 6.95,10.95    | - |
| chr5 | 229287 | 229345 | CSAR_peak_ | 16.33,12.13   | - |
| chr5 | 229374 | 229492 | CSAR_peak_ | 29.4,14.88    | - |
| chr5 | 261070 | 261181 | CSAR_peak_ | 22.56         | - |
| chr5 | 261229 | 261280 | CSAR_peak_ | 14.88,13.48   | - |
| chr5 | 261428 | 261453 | CSAR_peak_ | 10.21         | - |
| chr5 | 261583 | 261629 | CSAR_peak_ | 14.34,20.13   | - |
| chr5 | 261661 | 261712 | CSAR_peak_ | 29.4          | - |
| chr5 | 261785 | 261979 | CSAR_peak_ | 34.93,29.14   | - |
| chr5 | 262041 | 262108 | CSAR_peak_ | 15.56,6.21    | - |
| chr5 | 262289 | 262351 | CSAR_peak_ | 19.93,16.77   | - |
| chr5 | 262982 | 263105 | CSAR_peak_ | 13.48,22.56   | - |
| chr5 | 263139 | 263220 | CSAR_peak_ | 13.48,10.83   | - |
| chr5 | 263307 | 263424 | CSAR_peak_ | 9.58,7.27,6.2 | - |
| chr5 | 263508 | 263646 | CSAR_peak_ | 12.13,16.08   | - |
| chr5 | 263682 | 263771 | CSAR_peak_ | 14.88         | - |
| chr5 | 263872 | 264044 | CSAR_peak_ | 18.49,16.22,; | - |
| chr5 | 264066 | 264370 | CSAR_peak_ | 37.12,16.54,; | - |
| chr5 | 264398 | 264418 | CSAR_peak_ | 6.21          | - |
| chr5 | 264497 | 264546 | CSAR_peak_ | 9.58          | - |

|      |        |        |            |                |
|------|--------|--------|------------|----------------|
| chr5 | 264562 | 264782 | CSAR_peak_ | 15.2,14.88,9.- |
| chr5 | 264892 | 264929 | CSAR_peak_ | 6.21 -         |
| chr5 | 267058 | 267200 | CSAR_peak_ | 27.94 -        |
| chr5 | 267315 | 267365 | CSAR_peak_ | 7.92,7.27,5.9- |
| chr5 | 267415 | 267454 | CSAR_peak_ | 5.62 -         |
| chr5 | 267879 | 267961 | CSAR_peak_ | 10.83,9.77 -   |
| chr5 | 268032 | 268098 | CSAR_peak_ | 18.65,7.27 -   |
| chr5 | 268154 | 268162 | CSAR_peak_ | 9.58 -         |
| chr5 | 268247 | 268322 | CSAR_peak_ | 15.68,17.88 -  |
| chr5 | 268391 | 268446 | CSAR_peak_ | 7.58 -         |
| chr5 | 268560 | 268644 | CSAR_peak_ | 9.77 -         |
| chr5 | 269228 | 269288 | CSAR_peak_ | 7.27,7.27 -    |
| chr5 | 269753 | 269805 | CSAR_peak_ | 17.82 -        |
| chr5 | 269851 | 269927 | CSAR_peak_ | 9.27,19.96 -   |
| chr5 | 273056 | 273124 | CSAR_peak_ | 14.85 -        |
| chr5 | 273381 | 273429 | CSAR_peak_ | 6.21,21.24,1(- |
| chr5 | 273451 | 273506 | CSAR_peak_ | 17.3,16.33 -   |
| chr5 | 273554 | 273682 | CSAR_peak_ | 24.52,24.52 -  |
| chr5 | 273724 | 273828 | CSAR_peak_ | 30.81,42.64 -  |
| chr5 | 274441 | 274480 | CSAR_peak_ | 6.21 -         |
| chr5 | 276072 | 276180 | CSAR_peak_ | 14.88,14.88 -  |
| chr5 | 276784 | 276819 | CSAR_peak_ | 6.21 -         |
| chr5 | 277525 | 277592 | CSAR_peak_ | 17.37,7.58 -   |
| chr5 | 364713 | 364765 | CSAR_peak_ | 7.27 -         |
| chr5 | 365093 | 365176 | CSAR_peak_ | 10.83 -        |
| chr5 | 365272 | 365401 | CSAR_peak_ | 13.92 -        |
| chr5 | 365404 | 365536 | CSAR_peak_ | 19.36,10.02 -  |
| chr5 | 365870 | 365971 | CSAR_peak_ | 10.02 -        |
| chr5 | 366062 | 366124 | CSAR_peak_ | 6.94 -         |
| chr5 | 366209 | 366232 | CSAR_peak_ | 6.21 -         |
| chr5 | 366430 | 366477 | CSAR_peak_ | 7.27 -         |
| chr5 | 366513 | 366584 | CSAR_peak_ | 16.05 -        |
| chr5 | 366708 | 366749 | CSAR_peak_ | 7.27 -         |
| chr5 | 367826 | 367864 | CSAR_peak_ | 5.79,6.44 -    |
| chr5 | 367941 | 368010 | CSAR_peak_ | 20.43,8.95 -   |
| chr5 | 368641 | 368748 | CSAR_peak_ | 8.65,7.27 -    |
| chr5 | 368819 | 368872 | CSAR_peak_ | 12.17 -        |
| chr5 | 369044 | 369083 | CSAR_peak_ | 14.85,12.13 -  |
| chr5 | 369269 | 369506 | CSAR_peak_ | 44.02,20.05,-  |
| chr5 | 373812 | 373864 | CSAR_peak_ | 7.27 -         |
| chr5 | 386365 | 386421 | CSAR_peak_ | 7.34 -         |
| chr5 | 386511 | 386523 | CSAR_peak_ | 7.27 -         |

|      |        |        |            |               |   |
|------|--------|--------|------------|---------------|---|
| chr5 | 386661 | 386737 | CSAR_peak_ | 7.27          | - |
| chr5 | 387149 | 387199 | CSAR_peak_ | 10.62,7.27    | - |
| chr5 | 387275 | 387351 | CSAR_peak_ | 13,7.7        | - |
| chr5 | 389895 | 389932 | CSAR_peak_ | 16.54,10.25   | - |
| chr5 | 467227 | 467243 | CSAR_peak_ | 6.21          | - |
| chr5 | 467473 | 467523 | CSAR_peak_ | 7             | - |
| chr5 | 467994 | 468064 | CSAR_peak_ | 14.88         | - |
| chr5 | 468728 | 468842 | CSAR_peak_ | 8.09,6.81     | - |
| chr5 | 469416 | 469489 | CSAR_peak_ | 7.27,7.92     | - |
| chr5 | 469828 | 469878 | CSAR_peak_ | 7.27          | - |
| chr5 | 470083 | 470126 | CSAR_peak_ | 7.27          | - |
| chr5 | 470462 | 470597 | CSAR_peak_ | 27.11,9.58,1  | - |
| chr5 | 470623 | 470745 | CSAR_peak_ | 8.39,9.58     | - |
| chr5 | 470873 | 470928 | CSAR_peak_ | 16.11,7.27    | - |
| chr5 | 470940 | 470997 | CSAR_peak_ | 12.31,7.27    | - |
| chr5 | 471160 | 471216 | CSAR_peak_ | 6.03          | - |
| chr5 | 471311 | 471413 | CSAR_peak_ | 13.48,7.27,9. | - |
| chr5 | 471582 | 471659 | CSAR_peak_ | 14.88,16.11   | - |
| chr5 | 506759 | 506924 | CSAR_peak_ | 12.13,24.11,; | - |
| chr5 | 507100 | 507180 | CSAR_peak_ | 17.63,30.49   | - |
| chr5 | 543029 | 543081 | CSAR_peak_ | 7.27          | - |
| chr5 | 544164 | 544218 | CSAR_peak_ | 12.13         | - |
| chr5 | 554233 | 554273 | CSAR_peak_ | 6.44          | - |
| chr5 | 554307 | 554377 | CSAR_peak_ | 18.65,7.7     | - |
| chr5 | 554449 | 554505 | CSAR_peak_ | 6.57,7.27     | - |
| chr5 | 554883 | 554924 | CSAR_peak_ | 9.58          | - |
| chr5 | 555656 | 555749 | CSAR_peak_ | 28.34         | - |
| chr5 | 555771 | 555814 | CSAR_peak_ | 12.17         | - |
| chr5 | 556108 | 556162 | CSAR_peak_ | 25.07         | - |
| chr5 | 556293 | 556343 | CSAR_peak_ | 7.27          | - |
| chr5 | 622468 | 622527 | CSAR_peak_ | 7.27          | - |
| chr5 | 625239 | 625346 | CSAR_peak_ | 9.58          | - |
| chr5 | 625541 | 625666 | CSAR_peak_ | 25.91,12.17   | - |
| chr5 | 625975 | 626025 | CSAR_peak_ | 7.27          | - |
| chr5 | 627481 | 627596 | CSAR_peak_ | 24.21,9.58    | - |
| chr5 | 628068 | 628105 | CSAR_peak_ | 6.21          | - |
| chr5 | 628232 | 628259 | CSAR_peak_ | 7.27          | - |
| chr5 | 628403 | 628482 | CSAR_peak_ | 7.27,8.28,20. | - |
| chr5 | 628514 | 628541 | CSAR_peak_ | 20.43,6.45    | - |
| chr5 | 628633 | 628760 | CSAR_peak_ | 16.87,7.13,1  | - |
| chr5 | 628833 | 628935 | CSAR_peak_ | 7.29,28.94,6. | - |
| chr5 | 628982 | 629116 | CSAR_peak_ | 19.98,17.82   | - |

|      |        |                   |                 |
|------|--------|-------------------|-----------------|
| chr5 | 635379 | 635452 CSAR_peak_ | 6.21 -          |
| chr5 | 635899 | 635990 CSAR_peak_ | 13.48,14.76 -   |
| chr5 | 636654 | 636695 CSAR_peak_ | 6.44 -          |
| chr5 | 636697 | 636714 CSAR_peak_ | 5.95,6.95 -     |
| chr5 | 637276 | 637338 CSAR_peak_ | 8.14,13.48 -    |
| chr5 | 638019 | 638096 CSAR_peak_ | 13.66 -         |
| chr5 | 638264 | 638410 CSAR_peak_ | 42.44,23.8 -    |
| chr5 | 638506 | 638591 CSAR_peak_ | 43.36,15.43 -   |
| chr5 | 638684 | 638823 CSAR_peak_ | 15.32,37.82,-   |
| chr5 | 638831 | 638866 CSAR_peak_ | 7.27 -          |
| chr5 | 638935 | 639248 CSAR_peak_ | 25.91,12.31,-   |
| chr5 | 639273 | 639766 CSAR_peak_ | 27.77,46.82,-   |
| chr5 | 639799 | 639885 CSAR_peak_ | 50.96,49.31 -   |
| chr5 | 639917 | 640037 CSAR_peak_ | 7.27,9.55,10.-  |
| chr5 | 640099 | 640258 CSAR_peak_ | 28.62,20.12 -   |
| chr5 | 640266 | 640288 CSAR_peak_ | 7.73 -          |
| chr5 | 640289 | 640463 CSAR_peak_ | 8.3,25.08,38.-  |
| chr5 | 640622 | 641116 CSAR_peak_ | 20.12,13.76,-   |
| chr5 | 641129 | 641268 CSAR_peak_ | 33.13,41.68 -   |
| chr5 | 641286 | 641439 CSAR_peak_ | 13.29,17.52,-   |
| chr5 | 641464 | 641493 CSAR_peak_ | 11.39 -         |
| chr5 | 641735 | 641812 CSAR_peak_ | 61.58,17.35 -   |
| chr5 | 684808 | 684998 CSAR_peak_ | 24.21,7.34,20.- |
| chr5 | 685106 | 685147 CSAR_peak_ | 20.94,17.82 -   |
| chr5 | 685219 | 685258 CSAR_peak_ | 12.13,7.27 -    |
| chr5 | 685372 | 685418 CSAR_peak_ | 8.39 -          |
| chr5 | 685675 | 685747 CSAR_peak_ | 6.03,7.27 -     |
| chr5 | 685883 | 685919 CSAR_peak_ | 12.13 -         |
| chr5 | 685955 | 685976 CSAR_peak_ | 10.33 -         |
| chr5 | 686053 | 686063 CSAR_peak_ | 6.57 -          |
| chr5 | 686075 | 686155 CSAR_peak_ | 10.17,6.85 -    |
| chr5 | 686260 | 686478 CSAR_peak_ | 11.96,9.27,11.- |
| chr5 | 686755 | 686872 CSAR_peak_ | 17.37,9.61 -    |
| chr5 | 687364 | 687431 CSAR_peak_ | 24.21 -         |
| chr5 | 687463 | 687473 CSAR_peak_ | 10.83 -         |
| chr5 | 687592 | 687706 CSAR_peak_ | 6.21,9.58,11.-  |
| chr5 | 687810 | 687891 CSAR_peak_ | 6.21 -          |
| chr5 | 688013 | 688086 CSAR_peak_ | 20.94,6.95 -    |
| chr5 | 688168 | 688214 CSAR_peak_ | 7.27 -          |
| chr5 | 688727 | 688767 CSAR_peak_ | 8.95 -          |
| chr5 | 693320 | 693393 CSAR_peak_ | 6.21,8.09 -     |
| chr5 | 693398 | 693421 CSAR_peak_ | 12.13 -         |



|      |        |        |            |                |   |
|------|--------|--------|------------|----------------|---|
| chr5 | 693509 | 693543 | CSAR_peak_ | 12.13,9.58     | - |
| chr5 | 693734 | 693764 | CSAR_peak_ | 7.27           | - |
| chr5 | 693791 | 693846 | CSAR_peak_ | 8.65,8.92      | - |
| chr5 | 709841 | 709918 | CSAR_peak_ | 17.82,16.33    | - |
| chr5 | 710045 | 710082 | CSAR_peak_ | 6.21           | - |
| chr5 | 710140 | 710190 | CSAR_peak_ | 12.13          | - |
| chr5 | 710484 | 710548 | CSAR_peak_ | 7.27           | - |
| chr5 | 710863 | 710956 | CSAR_peak_ | 14.88,16.05    | - |
| chr5 | 710963 | 711056 | CSAR_peak_ | 27.64,19.36    | - |
| chr5 | 711164 | 711291 | CSAR_peak_ | 20.94,12.74    | - |
| chr5 | 711569 | 711681 | CSAR_peak_ | 8.28,22.56     | - |
| chr5 | 711792 | 711817 | CSAR_peak_ | 5.86,12.13,6.- | - |
| chr5 | 711945 | 712046 | CSAR_peak_ | 29.2,12.13     | - |
| chr5 | 712347 | 712419 | CSAR_peak_ | 9.58,9.58      | - |
| chr5 | 712554 | 712603 | CSAR_peak_ | 14.88          | - |
| chr5 | 715389 | 715438 | CSAR_peak_ | 10.83,17.82    | - |
| chr5 | 715533 | 715587 | CSAR_peak_ | 14.88,6.21     | - |
| chr5 | 715921 | 715961 | CSAR_peak_ | 5.86           | - |
| chr5 | 760180 | 760261 | CSAR_peak_ | 9.58,8.39      | - |
| chr5 | 760456 | 760499 | CSAR_peak_ | 10.83          | - |
| chr5 | 763055 | 763110 | CSAR_peak_ | 13.66,11.38    | - |
| chr5 | 763232 | 763277 | CSAR_peak_ | 6.44           | - |
| chr5 | 771874 | 771912 | CSAR_peak_ | 9.58           | - |
| chr5 | 772096 | 772237 | CSAR_peak_ | 29.69,17.37    | - |
| chr5 | 772249 | 772351 | CSAR_peak_ | 19.21,31.2     | - |
| chr5 | 772464 | 772654 | CSAR_peak_ | 26.69,23.49,-  | - |
| chr5 | 772724 | 772905 | CSAR_peak_ | 30.81,12.31,-  | - |
| chr5 | 773055 | 773151 | CSAR_peak_ | 11.14          | - |
| chr5 | 773279 | 773324 | CSAR_peak_ | 7.27           | - |
| chr5 | 812314 | 812354 | CSAR_peak_ | 9.58           | - |
| chr5 | 832307 | 832397 | CSAR_peak_ | 17.82,6.44     | - |
| chr5 | 832498 | 832585 | CSAR_peak_ | 6.87           | - |
| chr5 | 832599 | 832676 | CSAR_peak_ | 10.83          | - |
| chr5 | 832716 | 832986 | CSAR_peak_ | 9.48,15.9,6.9- | - |
| chr5 | 833206 | 833253 | CSAR_peak_ | 8.39           | - |
| chr5 | 833299 | 833382 | CSAR_peak_ | 10.83          | - |
| chr5 | 833915 | 833994 | CSAR_peak_ | 12.2           | - |
| chr5 | 834203 | 834236 | CSAR_peak_ | 12.13          | - |
| chr5 | 849113 | 849167 | CSAR_peak_ | 7.92           | - |
| chr5 | 849201 | 849321 | CSAR_peak_ | 16.77          | - |
| chr5 | 849394 | 849447 | CSAR_peak_ | 19.36          | - |
| chr5 | 849860 | 849906 | CSAR_peak_ | 14.88          | - |

|      |        |        |             |               |   |
|------|--------|--------|-------------|---------------|---|
| chr5 | 849991 | 850054 | CSAR_peak_  | 24.21,6.85    | - |
| chr5 | 850211 | 850245 | CSAR_peak_  | 12.13,10.02   | - |
| chr5 | 850424 | 850503 | CSAR_peak_  | 12.13,7.27    | - |
| chr5 | 850601 | 850652 | CSAR_peak_  | 9.58,14.76    | - |
| chr5 | 850810 | 850883 | CSAR_peak_  | 6.03,13.51    | - |
| chr5 | 851036 | 851165 | CSAR_peak_  | 10.02,25.62   | - |
| chr5 | 852799 | 852816 | CSAR_peak_  | 6.21          | - |
| chr5 | 861267 | 861351 | CSAR_peak_  | 8.39          | - |
| chr5 | 886401 | 886427 | CSAR_peak_  | 6.21          | - |
| chr5 | 886518 | 886537 | CSAR_peak_  | 7.27          | - |
| chr5 | 901121 | 901169 | CSAR_peak_  | 6.21          | - |
| chr5 | 922528 | 922612 | CSAR_peak_  | 12.13,13.44   | - |
| chr5 | 922667 | 922708 | CSAR_peak_  | 12.13         | - |
| chr5 | 922792 | 922865 | CSAR_peak_  | 25.91,14.88   | - |
| chr5 | 923075 | 923149 | CSAR_peak_  | 8.12,10.31,7. | - |
| chr5 | 923240 | 923292 | CSAR_peak_  | 13.48,12.13   | - |
| chr5 | 923563 | 923635 | CSAR_peak_  | 12.13,6.21    | - |
| chr5 | 923799 | 923889 | CSAR_peak_  | 14.08,17.82   | - |
| chr5 | 923969 | 924032 | CSAR_peak_  | 6.32,9.13,7   | - |
| chr5 | 924302 | 924382 | CSAR_peak_  | 8.13,10.02    | - |
| chr5 | 924563 | 924624 | CSAR_peak_  | 9.58          | - |
| chr5 | 965945 | 966006 | CSAR_peak_  | 10.31         | - |
| chr5 | 971935 | 972027 | CSAR_peak_  | 9.58          | - |
| chr5 | 972260 | 972333 | CSAR_peak_  | 6.52          | - |
| chr5 | 972746 | 972823 | CSAR_peak_  | 8.39,9.58     | - |
| chr5 | 974443 | 974492 | CSAR_peak_  | 6.21          | - |
| chr5 | 974668 | 974730 | CSAR_peak_  | 9.58          | - |
| chr5 | 975039 | 975055 | CSAR_peak_  | 9.77          | - |
| chr5 | 975116 | 975175 | CSAR_peak_  | 25.21,8.34    | - |
| chr5 | 975186 | 975239 | CSAR_peak_  | 16.08,5.62    | - |
| chr5 | 975341 | 975436 | CSAR_peak_  | 8.28,14.88    | - |
| chr5 | 975450 | 975513 | CSAR_peak_  | 7.68,12.17    | - |
| chr5 | 975576 | 975626 | CSAR_peak_  | 7.27,8.14     | - |
| chr5 | 975945 | 975987 | CSAR_peak_  | 8.02,8.12     | - |
| chr5 | 976068 | 976118 | CSAR_peak_! | 25.48         | - |
| chr5 | 976245 | 976280 | CSAR_peak_  | 9.58          | - |
| chr5 | 976316 | 976369 | CSAR_peak_  | 17.82         | - |
| chr5 | 976426 | 976503 | CSAR_peak_  | 8.65          | - |
| chr5 | 976769 | 976833 | CSAR_peak_  | 14.88,24.21   | - |
| chr5 | 977002 | 977041 | CSAR_peak_  | 7.92,7.27     | - |
| chr5 | 977198 | 977254 | CSAR_peak_  | 8.12          | - |
| chr5 | 977978 | 978096 | CSAR_peak_  | 34.93,12.14   | - |

|      |         |         |            |               |   |
|------|---------|---------|------------|---------------|---|
| chr5 | 978302  | 978374  | CSAR_peak_ | 11.38         | - |
| chr5 | 978536  | 978586  | CSAR_peak_ | 7.34          | - |
| chr5 | 979013  | 979096  | CSAR_peak_ | 10.83         | - |
| chr5 | 979120  | 979251  | CSAR_peak_ | 7.58,16.33,7. | - |
| chr5 | 979276  | 979320  | CSAR_peak_ | 10.31,16.11   | - |
| chr5 | 1028709 | 1028738 | CSAR_peak_ | 6.21          | - |
| chr5 | 1039461 | 1039497 | CSAR_peak_ | 8.39          | - |
| chr5 | 1040934 | 1040977 | CSAR_peak_ | 12.13         | - |
| chr5 | 1054891 | 1054944 | CSAR_peak_ | 9.58          | - |
| chr5 | 1061300 | 1061306 | CSAR_peak_ | 6.03          | - |
| chr5 | 1061398 | 1061432 | CSAR_peak_ | 9.58          | - |
| chr5 | 1061642 | 1061720 | CSAR_peak_ | 7.27          | - |
| chr5 | 1062898 | 1063003 | CSAR_peak_ | 7.27          | - |
| chr5 | 1082355 | 1082435 | CSAR_peak_ | 9.58,12.13    | - |
| chr5 | 1082468 | 1082570 | CSAR_peak_ | 9.58,9.58     | - |
| chr5 | 1083324 | 1083414 | CSAR_peak_ | 17.82,7.92    | - |
| chr5 | 1083530 | 1083589 | CSAR_peak_ | 7.27,6.21     | - |
| chr5 | 1084090 | 1084156 | CSAR_peak_ | 12.13         | - |
| chr5 | 1084768 | 1084865 | CSAR_peak_ | 5.86,9.58     | - |
| chr5 | 1085163 | 1085250 | CSAR_peak_ | 14.88,12.13   | - |
| chr5 | 1085255 | 1085327 | CSAR_peak_ | 8.39          | - |
| chr5 | 1085401 | 1085490 | CSAR_peak_ | 10.82,8.14,7. | - |
| chr5 | 1086035 | 1086115 | CSAR_peak_ | 8.39,5.86,25. | - |
| chr5 | 1086123 | 1086165 | CSAR_peak_ | 7.27          | - |
| chr5 | 1105719 | 1105737 | CSAR_peak_ | 7.27          | - |
| chr5 | 1105923 | 1105969 | CSAR_peak_ | 8.39,7.27     | - |
| chr5 | 1106546 | 1106594 | CSAR_peak_ | 7.27          | - |
| chr5 | 1106927 | 1106989 | CSAR_peak_ | 8.39,7.27     | - |
| chr5 | 1107582 | 1107640 | CSAR_peak_ | 6.21,8.39     | - |
| chr5 | 1156054 | 1156114 | CSAR_peak_ | 8.52          | - |
| chr5 | 1156199 | 1156251 | CSAR_peak_ | 10.02,7.27    | - |
| chr5 | 1156292 | 1156328 | CSAR_peak_ | 9.03          | - |
| chr5 | 1156409 | 1156443 | CSAR_peak_ | 14.88         | - |
| chr5 | 1156614 | 1156666 | CSAR_peak_ | 9.58          | - |
| chr5 | 1156702 | 1156766 | CSAR_peak_ | 14.88         | - |
| chr5 | 1156848 | 1156888 | CSAR_peak_ | 10.83         | - |
| chr5 | 1156892 | 1156952 | CSAR_peak_ | 12.5          | - |
| chr5 | 1157358 | 1157445 | CSAR_peak_ | 9.58          | - |
| chr5 | 1157449 | 1157453 | CSAR_peak_ | 6.03          | - |
| chr5 | 1157532 | 1157634 | CSAR_peak_ | 10.95,10.83   | - |
| chr5 | 1157712 | 1157776 | CSAR_peak_ | 10.02,13.48   | - |
| chr5 | 1157922 | 1157965 | CSAR_peak_ | 9.77          | - |

|      |         |         |            |                |   |
|------|---------|---------|------------|----------------|---|
| chr5 | 1157987 | 1158048 | CSAR_peak_ | 9.58           | - |
| chr5 | 1158510 | 1158548 | CSAR_peak_ | 9.58           | - |
| chr5 | 1167604 | 1167665 | CSAR_peak_ | 7.58           | - |
| chr5 | 1168333 | 1168427 | CSAR_peak_ | 7.27           | - |
| chr5 | 1179098 | 1179138 | CSAR_peak_ | 9.58,7.58      | - |
| chr5 | 1179231 | 1179282 | CSAR_peak_ | 8.39           | - |
| chr5 | 1179429 | 1179449 | CSAR_peak_ | 8.39           | - |
| chr5 | 1179709 | 1179761 | CSAR_peak_ | 7.27,7.27      | - |
| chr5 | 1205385 | 1205448 | CSAR_peak_ | 6.21           | - |
| chr5 | 1216351 | 1216419 | CSAR_peak_ | 12.74,6.95     | - |
| chr5 | 1216827 | 1216885 | CSAR_peak_ | 7.27           | - |
| chr5 | 1247653 | 1247700 | CSAR_peak_ | 9.58           | - |
| chr5 | 1249189 | 1249252 | CSAR_peak_ | 17.82          | - |
| chr5 | 1250615 | 1250716 | CSAR_peak_ | 6.44           | - |
| chr5 | 1250788 | 1250828 | CSAR_peak_ | 13.66          | - |
| chr5 | 1250834 | 1250850 | CSAR_peak_ | 8.61           | - |
| chr5 | 1250908 | 1250968 | CSAR_peak_ | 9.72,14.99,7.  | - |
| chr5 | 1251002 | 1251015 | CSAR_peak_ | 7.36           | - |
| chr5 | 1251440 | 1251581 | CSAR_peak_ | 7.58,10.53,14. | - |
| chr5 | 1251728 | 1251788 | CSAR_peak_ | 9.58           | - |
| chr5 | 1251824 | 1251872 | CSAR_peak_ | 6.21           | - |
| chr5 | 1251905 | 1252011 | CSAR_peak_ | 7.27,8.39      | - |
| chr5 | 1252081 | 1252195 | CSAR_peak_ | 16.08,7.13     | - |
| chr5 | 1252689 | 1252771 | CSAR_peak_ | 11.03,10.94    | - |
| chr5 | 1252777 | 1252791 | CSAR_peak_ | 6.94,18.65     | - |
| chr5 | 1252896 | 1253015 | CSAR_peak_ | 26.37,17.4     | - |
| chr5 | 1253439 | 1253526 | CSAR_peak_ | 16.08,14.34    | - |
| chr5 | 1253667 | 1253680 | CSAR_peak_ | 8.02           | - |
| chr5 | 1253695 | 1253803 | CSAR_peak_ | 16.25,9.72     | - |
| chr5 | 1271867 | 1272047 | CSAR_peak_ | 8.65,13.85     | - |
| chr5 | 1272115 | 1272282 | CSAR_peak_ | 17.35,11.14    | - |
| chr5 | 1273062 | 1273107 | CSAR_peak_ | 7.27           | - |
| chr5 | 1273270 | 1273473 | CSAR_peak_ | 14.88,12.13    | - |
| chr5 | 1273690 | 1273711 | CSAR_peak_ | 9.58           | - |
| chr5 | 1273882 | 1273932 | CSAR_peak_ | 8.14           | - |
| chr5 | 1274215 | 1274274 | CSAR_peak_ | 7.27,7.27      | - |
| chr5 | 1274494 | 1274546 | CSAR_peak_ | 10.83,7.58     | - |
| chr5 | 1274668 | 1274757 | CSAR_peak_ | 17.82,7.27,9.  | - |
| chr5 | 1275146 | 1275276 | CSAR_peak_ | 18.95,9.77     | - |
| chr5 | 1275283 | 1275368 | CSAR_peak_ | 13.51,7.92     | - |
| chr5 | 1275525 | 1275632 | CSAR_peak_ | 13.48,9.58     | - |
| chr5 | 1275834 | 1275859 | CSAR_peak_ | 20.94          | - |

|      |         |         |            |                |
|------|---------|---------|------------|----------------|
| chr5 | 1275989 | 1276081 | CSAR_peak_ | 9.32,5.86,27.- |
| chr5 | 1276295 | 1276348 | CSAR_peak_ | 9.58 -         |
| chr5 | 1277286 | 1277473 | CSAR_peak_ | 13.09,24.21 -  |
| chr5 | 1277722 | 1277776 | CSAR_peak_ | 8.39 -         |
| chr5 | 1296913 | 1297007 | CSAR_peak_ | 10.02 -        |
| chr5 | 1297073 | 1297123 | CSAR_peak_ | 17.82 -        |
| chr5 | 1297177 | 1297260 | CSAR_peak_ | 7.31,7.26 -    |
| chr5 | 1297416 | 1297515 | CSAR_peak_ | 20.35,20.54 -  |
| chr5 | 1298640 | 1298660 | CSAR_peak_ | 7.27 -         |
| chr5 | 1298854 | 1298906 | CSAR_peak_ | 9.58 -         |
| chr5 | 1298958 | 1298983 | CSAR_peak_ | 8.39 -         |
| chr5 | 1299021 | 1299046 | CSAR_peak_ | 8.39 -         |
| chr5 | 1299305 | 1299422 | CSAR_peak_ | 17.82,12.17,-  |
| chr5 | 1299509 | 1299548 | CSAR_peak_ | 7.27 -         |
| chr5 | 1299988 | 1300054 | CSAR_peak_ | 5.86,6.03,6.8- |
| chr5 | 1300219 | 1300242 | CSAR_peak_ | 6.21 -         |
| chr5 | 1300331 | 1300378 | CSAR_peak_ | 8.65,7 -       |
| chr5 | 1300796 | 1300882 | CSAR_peak_ | 8.39,10.83 -   |
| chr5 | 1301266 | 1301341 | CSAR_peak_ | 13.48 -        |
| chr5 | 1301422 | 1301460 | CSAR_peak_ | 6.21,12.13 -   |
| chr5 | 1301972 | 1302016 | CSAR_peak_ | 14.88,12.31 -  |
| chr5 | 1302192 | 1302244 | CSAR_peak_ | 10.02,34.89,-  |
| chr5 | 1302247 | 1302301 | CSAR_peak_ | 7.27 -         |
| chr5 | 1303480 | 1303519 | CSAR_peak_ | 6.21 -         |
| chr5 | 1303944 | 1303993 | CSAR_peak_ | 6.03 -         |
| chr5 | 1304009 | 1304076 | CSAR_peak_ | 7.27 -         |
| chr5 | 1305134 | 1305180 | CSAR_peak_ | 9.77 -         |
| chr5 | 1305185 | 1305479 | CSAR_peak_ | 6.21,15.68,6.- |
| chr5 | 1337989 | 1338038 | CSAR_peak_ | 7.58 -         |
| chr5 | 1368374 | 1368424 | CSAR_peak_ | 9.58 -         |
| chr5 | 1368718 | 1368760 | CSAR_peak_ | 6.21 -         |
| chr5 | 1368866 | 1368909 | CSAR_peak_ | 7.27,14.88 -   |
| chr5 | 1369005 | 1369096 | CSAR_peak_ | 7.92,11.57 -   |
| chr5 | 1369229 | 1369285 | CSAR_peak_ | 13.48 -        |
| chr5 | 1369447 | 1369513 | CSAR_peak_ | 9.58 -         |
| chr5 | 1370075 | 1370170 | CSAR_peak_ | 14.88,11.38 -  |
| chr5 | 1370319 | 1370420 | CSAR_peak_ | 9.41,6.21 -    |
| chr5 | 1370430 | 1370511 | CSAR_peak_ | 10.33,9.77 -   |
| chr5 | 1371211 | 1371289 | CSAR_peak_ | 8.14,12.13 -   |
| chr5 | 1374009 | 1374091 | CSAR_peak_ | 19.36,12.13 -  |
| chr5 | 1374191 | 1374287 | CSAR_peak_ | 5.86,27.64,2!- |
| chr5 | 1374348 | 1374416 | CSAR_peak_ | 8.39 -         |

|      |         |         |             |                |   |
|------|---------|---------|-------------|----------------|---|
| chr5 | 1374474 | 1374547 | CSAR_peak_  | 12.17,9.58     | - |
| chr5 | 1402522 | 1402562 | CSAR_peak_  | 11.38          | - |
| chr5 | 1402717 | 1402760 | CSAR_peak_  | 12.31          | - |
| chr5 | 1403657 | 1403674 | CSAR_peak_  | 7.53           | - |
| chr5 | 1403771 | 1403814 | CSAR_peak_  | 12.35          | - |
| chr5 | 1408654 | 1408693 | CSAR_peak_! | 5.86           | - |
| chr5 | 1408705 | 1408710 | CSAR_peak_  | 7.27           | - |
| chr5 | 1408821 | 1408860 | CSAR_peak_  | 8.39           | - |
| chr5 | 1417064 | 1417206 | CSAR_peak_  | 9.58,6.44,8.1- |   |
| chr5 | 1417480 | 1417551 | CSAR_peak_  | 7.92,7.58      | - |
| chr5 | 1417851 | 1417984 | CSAR_peak_  | 7.27,13.51     | - |
| chr5 | 1418211 | 1418263 | CSAR_peak_  | 6.21           | - |
| chr5 | 1418704 | 1418749 | CSAR_peak_  | 11.14          | - |
| chr5 | 1418762 | 1418835 | CSAR_peak_  | 7.27           | - |
| chr5 | 1418972 | 1419009 | CSAR_peak_  | 6.21           | - |
| chr5 | 1419174 | 1419238 | CSAR_peak_  | 14.88          | - |
| chr5 | 1419349 | 1419426 | CSAR_peak_  | 19.93          | - |
| chr5 | 1419449 | 1419508 | CSAR_peak_  | 10.83          | - |
| chr5 | 1419597 | 1419692 | CSAR_peak_  | 19.36,23.03    | - |
| chr5 | 1419847 | 1419888 | CSAR_peak_  | 6.21           | - |
| chr5 | 1420008 | 1420056 | CSAR_peak_  | 6.21           | - |
| chr5 | 1440513 | 1440598 | CSAR_peak_  | 7.27,17.82     | - |
| chr5 | 1440996 | 1441086 | CSAR_peak_! | 6.57           | - |
| chr5 | 1441474 | 1441533 | CSAR_peak_  | 6.21,8.39      | - |
| chr5 | 1441563 | 1441604 | CSAR_peak_  | 16.33          | - |
| chr5 | 1468574 | 1468627 | CSAR_peak_  | 8.39           | - |
| chr5 | 1468682 | 1468755 | CSAR_peak_  | 19.36,8.39     | - |
| chr5 | 1468817 | 1468878 | CSAR_peak_  | 7.27,6.81,7.2- |   |
| chr5 | 1468917 | 1468984 | CSAR_peak_  | 9.77,6.21      | - |
| chr5 | 1469129 | 1469185 | CSAR_peak_  | 12.13          | - |
| chr5 | 1469277 | 1469376 | CSAR_peak_  | 7.27           | - |
| chr5 | 1469753 | 1469815 | CSAR_peak_  | 11.03,9.77     | - |
| chr5 | 1469924 | 1469993 | CSAR_peak_  | 6.21           | - |
| chr5 | 1470051 | 1470098 | CSAR_peak_  | 10.83          | - |
| chr5 | 1475540 | 1475576 | CSAR_peak_  | 6.44           | - |
| chr5 | 1499134 | 1499191 | CSAR_peak_  | 6.81           | - |
| chr5 | 1499556 | 1499673 | CSAR_peak_  | 7.27,8.39,6.2- |   |
| chr5 | 1499697 | 1499822 | CSAR_peak_  | 17.82          | - |
| chr5 | 1499970 | 1500040 | CSAR_peak_  | 12.13          | - |
| chr5 | 1500582 | 1500622 | CSAR_peak_  | 9.58           | - |
| chr5 | 1503480 | 1503553 | CSAR_peak_! | 7              | - |
| chr5 | 1503850 | 1503902 | CSAR_peak_  | 9.58           | - |

|      |         |                    |                |   |
|------|---------|--------------------|----------------|---|
| chr5 | 1504489 | 1504532 CSAR_peak_ | 8.39           | - |
| chr5 | 1505466 | 1505477 CSAR_peak_ | 9.58,7.27      | - |
| chr5 | 1505582 | 1505633 CSAR_peak_ | 25.91,24.21    | - |
| chr5 | 1505657 | 1505726 CSAR_peak_ | 14.88          | - |
| chr5 | 1505890 | 1505947 CSAR_peak_ | 13.48          | - |
| chr5 | 1505951 | 1506047 CSAR_peak_ | 7.27,7.27      | - |
| chr5 | 1528071 | 1528186 CSAR_peak_ | 9.58           | - |
| chr5 | 1528264 | 1528423 CSAR_peak_ | 17.82          | - |
| chr5 | 1529474 | 1529578 CSAR_peak_ | 9.58           | - |
| chr5 | 1530243 | 1530315 CSAR_peak_ | 12.13,8.39     | - |
| chr5 | 1530684 | 1530805 CSAR_peak_ | 17.82          | - |
| chr5 | 1531233 | 1531331 CSAR_peak_ | 7.27           | - |
| chr5 | 1531455 | 1531492 CSAR_peak_ | 6.78           | - |
| chr5 | 1531572 | 1531627 CSAR_peak_ | 7              | - |
| chr5 | 1531712 | 1531801 CSAR_peak_ | 12.13          | - |
| chr5 | 1531954 | 1531983 CSAR_peak_ | 6.57           | - |
| chr5 | 1531992 | 1532221 CSAR_peak_ | 9.25,10.02,8.  | - |
| chr5 | 1532342 | 1532403 CSAR_peak_ | 19.36,9.58     | - |
| chr5 | 1532659 | 1532777 CSAR_peak_ | 31.2,16.25     | - |
| chr5 | 1532833 | 1532916 CSAR_peak_ | 9.58           | - |
| chr5 | 1532958 | 1532988 CSAR_peak_ | 10.83,16.55    | - |
| chr5 | 1533047 | 1533151 CSAR_peak_ | 42.33,27.73    | - |
| chr5 | 1533331 | 1533429 CSAR_peak_ | 9.77,14.76,7.  | - |
| chr5 | 1533517 | 1533580 CSAR_peak_ | 8.28           | - |
| chr5 | 1533754 | 1533796 CSAR_peak_ | 6.21           | - |
| chr5 | 1533894 | 1533980 CSAR_peak_ | 6.03,13.37,9.  | - |
| chr5 | 1534025 | 1534097 CSAR_peak_ | 21.74,6.32     | - |
| chr5 | 1534179 | 1534207 CSAR_peak_ | 6.85,9.72      | - |
| chr5 | 1534515 | 1534560 CSAR_peak_ | 8.09           | - |
| chr5 | 1534741 | 1534852 CSAR_peak_ | 6.1,14.76      | - |
| chr5 | 1534879 | 1534907 CSAR_peak_ | 9.72,13.6      | - |
| chr5 | 1535065 | 1535145 CSAR_peak_ | 52.84,27.55    | - |
| chr5 | 1535268 | 1535331 CSAR_peak_ | 9.77,6.03      | - |
| chr5 | 1545545 | 1545597 CSAR_peak_ | 12.13          | - |
| chr5 | 1546277 | 1546315 CSAR_peak_ | 7.27           | - |
| chr5 | 1546541 | 1546599 CSAR_peak_ | 12.17          | - |
| chr5 | 1546836 | 1546902 CSAR_peak_ | 10.83          | - |
| chr5 | 1600203 | 1600255 CSAR_peak_ | 6.21           | - |
| chr5 | 1664778 | 1664842 CSAR_peak_ | 7.27           | - |
| chr5 | 1667384 | 1667435 CSAR_peak_ | 6.21           | - |
| chr5 | 1677393 | 1677500 CSAR_peak_ | 10.83,5.86,10. | - |
| chr5 | 1677555 | 1677597 CSAR_peak_ | 13.48          | - |

|      |         |         |            |                |   |
|------|---------|---------|------------|----------------|---|
| chr5 | 1677704 | 1677761 | CSAR_peak_ | 8.39,6.21      | - |
| chr5 | 1694095 | 1694149 | CSAR_peak_ | 8.28           | - |
| chr5 | 1694530 | 1694573 | CSAR_peak_ | 10.83          | - |
| chr5 | 1696747 | 1696860 | CSAR_peak_ | 7.27           | - |
| chr5 | 1697486 | 1697529 | CSAR_peak_ | 7.27           | - |
| chr5 | 1699485 | 1699557 | CSAR_peak_ | 12.13          | - |
| chr5 | 1700775 | 1700853 | CSAR_peak_ | 19.36,10.83    | - |
| chr5 | 1702893 | 1703007 | CSAR_peak_ | 13.48,9.58     | - |
| chr5 | 1703104 | 1703115 | CSAR_peak_ | 6.21           | - |
| chr5 | 1703129 | 1703180 | CSAR_peak_ | 7.27           | - |
| chr5 | 1703211 | 1703249 | CSAR_peak_ | 9.58,9.58      | - |
| chr5 | 1703326 | 1703363 | CSAR_peak_ | 8.39,6.21      | - |
| chr5 | 1703410 | 1703433 | CSAR_peak_ | 7.27,9.58      | - |
| chr5 | 1703518 | 1703597 | CSAR_peak_ | 21.41,9.58,7.- | - |
| chr5 | 1703690 | 1703699 | CSAR_peak_ | 8.39           | - |
| chr5 | 1705973 | 1705999 | CSAR_peak_ | 7.27           | - |
| chr5 | 1706532 | 1706571 | CSAR_peak_ | 6.21           | - |
| chr5 | 1713003 | 1713055 | CSAR_peak_ | 9.58           | - |
| chr5 | 1719715 | 1719765 | CSAR_peak_ | 6.21           | - |
| chr5 | 1719809 | 1719939 | CSAR_peak_ | 22.56,8.39     | - |
| chr5 | 1719954 | 1720095 | CSAR_peak_ | 25.18,26.05    | - |
| chr5 | 1720104 | 1720166 | CSAR_peak_ | 20.05,8.39     | - |
| chr5 | 1720227 | 1720402 | CSAR_peak_ | 5.86,29.4,14.- | - |
| chr5 | 1720414 | 1720492 | CSAR_peak_ | 8.72,8.12,11.- | - |
| chr5 | 1720556 | 1720594 | CSAR_peak_ | 6.57,17.82     | - |
| chr5 | 1720709 | 1720850 | CSAR_peak_ | 17.87,21.81    | - |
| chr5 | 1720871 | 1720947 | CSAR_peak_ | 26.55          | - |
| chr5 | 1721010 | 1721157 | CSAR_peak_ | 54.36,20.43,!  | - |
| chr5 | 1721276 | 1721406 | CSAR_peak_ | 16.11,35.83    | - |
| chr5 | 1721821 | 1721868 | CSAR_peak_ | 10.83          | - |
| chr5 | 1721929 | 1722162 | CSAR_peak_ | 26.37,27.64,!  | - |
| chr5 | 1722228 | 1722366 | CSAR_peak_ | 13.69,13.84,!  | - |
| chr5 | 1722385 | 1722502 | CSAR_peak_ | 19.36,8.2,9.5- | - |
| chr5 | 1722622 | 1722725 | CSAR_peak_ | 13.48,6.21,7.- | - |
| chr5 | 1722761 | 1722865 | CSAR_peak_ | 14.88          | - |
| chr5 | 1725602 | 1725665 | CSAR_peak_ | 8.39           | - |
| chr5 | 1726268 | 1726307 | CSAR_peak_ | 7.27           | - |
| chr5 | 1741244 | 1741300 | CSAR_peak_ | 5.86           | - |
| chr5 | 1744606 | 1744669 | CSAR_peak_ | 7.27           | - |
| chr5 | 1780259 | 1780309 | CSAR_peak_ | 9.58,8.39      | - |
| chr5 | 1780399 | 1780527 | CSAR_peak_ | 7.36,13.85,8.- | - |
| chr5 | 1780784 | 1780854 | CSAR_peak_ | 6.57           | - |



|      |         |         |            |                |   |
|------|---------|---------|------------|----------------|---|
| chr5 | 1781402 | 1781478 | CSAR_peak_ | 7.27,13.48     | - |
| chr5 | 1782269 | 1782313 | CSAR_peak_ | 7.27           | - |
| chr5 | 1800170 | 1800230 | CSAR_peak_ | 12.13          | - |
| chr5 | 1800261 | 1800368 | CSAR_peak_ | 23.49,24.21    | - |
| chr5 | 1800653 | 1800693 | CSAR_peak_ | 7.58           | - |
| chr5 | 1800994 | 1801035 | CSAR_peak_ | 14.88          | - |
| chr5 | 1802210 | 1802220 | CSAR_peak_ | 6.21           | - |
| chr5 | 1802394 | 1802429 | CSAR_peak_ | 7.27           | - |
| chr5 | 1804040 | 1804069 | CSAR_peak_ | 7.27           | - |
| chr5 | 1824221 | 1824258 | CSAR_peak_ | 7.27           | - |
| chr5 | 1825763 | 1825826 | CSAR_peak_ | 9.58           | - |
| chr5 | 1841575 | 1841632 | CSAR_peak_ | 7.27           | - |
| chr5 | 1842186 | 1842224 | CSAR_peak_ | 5.86           | - |
| chr5 | 1843022 | 1843073 | CSAR_peak_ | 9.58           | - |
| chr5 | 1854168 | 1854221 | CSAR_peak_ | 9.58           | - |
| chr5 | 1854464 | 1854514 | CSAR_peak_ | 6.1,14.85      | - |
| chr5 | 1854926 | 1854971 | CSAR_peak_ | 7.27           | - |
| chr5 | 1856500 | 1856554 | CSAR_peak_ | 12.13          | - |
| chr5 | 1857149 | 1857173 | CSAR_peak_ | 7.58           | - |
| chr5 | 1857293 | 1857373 | CSAR_peak_ | 9.58           | - |
| chr5 | 1857596 | 1857625 | CSAR_peak_ | 7.27           | - |
| chr5 | 1857771 | 1857823 | CSAR_peak_ | 6.21           | - |
| chr5 | 1863846 | 1863901 | CSAR_peak_ | 9.77,9.58      | - |
| chr5 | 1863980 | 1864038 | CSAR_peak_ | 13.48,5.86,9.- | - |
| chr5 | 1865600 | 1865696 | CSAR_peak_ | 8.14,7         | - |
| chr5 | 1866312 | 1866385 | CSAR_peak_ | 7.27,7.27      | - |
| chr5 | 1867607 | 1867682 | CSAR_peak_ | 21.69,7.78,7.- | - |
| chr5 | 1867765 | 1867858 | CSAR_peak_ | 45.35,23.23,-  | - |
| chr5 | 1868118 | 1868178 | CSAR_peak_ | 9.38,13.14     | - |
| chr5 | 1917952 | 1918011 | CSAR_peak_ | 9.58           | - |
| chr5 | 1920608 | 1920653 | CSAR_peak_ | 9.58           | - |
| chr5 | 1922102 | 1922159 | CSAR_peak_ | 24.17,8.9      | - |
| chr5 | 1922235 | 1922274 | CSAR_peak_ | 6.02,14.88     | - |
| chr5 | 1922297 | 1922395 | CSAR_peak_ | 16.11,7.27     | - |
| chr5 | 1922880 | 1922916 | CSAR_peak_ | 11.14          | - |
| chr5 | 1923057 | 1923111 | CSAR_peak_ | 6.21,16.11     | - |
| chr5 | 1923134 | 1923177 | CSAR_peak_ | 10.18          | - |
| chr5 | 1923388 | 1923441 | CSAR_peak_ | 7.27           | - |
| chr5 | 1923820 | 1923858 | CSAR_peak_ | 6.21           | - |
| chr5 | 1923992 | 1924032 | CSAR_peak_ | 7.58,16.33     | - |
| chr5 | 1924103 | 1924125 | CSAR_peak_ | 7.27           | - |
| chr5 | 1924174 | 1924244 | CSAR_peak_ | 6.21,8.39      | - |

|      |         |         |             |                |   |
|------|---------|---------|-------------|----------------|---|
| chr5 | 1924853 | 1924902 | CSAR_peak_  | 9.58           | - |
| chr5 | 1925189 | 1925265 | CSAR_peak_  | 16.11,7.92     | - |
| chr5 | 1930689 | 1930741 | CSAR_peak_  | 12.13,6.21     | - |
| chr5 | 1931180 | 1931388 | CSAR_peak_  | 29.96,27.64    | - |
| chr5 | 1931591 | 1931649 | CSAR_peak_  | 7.27,7.27      | - |
| chr5 | 1931677 | 1931734 | CSAR_peak_  | 13.48,11.38    | - |
| chr5 | 1964828 | 1965200 | CSAR_peak_  | 12.13,12.17,-  | - |
| chr5 | 1965359 | 1965411 | CSAR_peak_  | 7.27           | - |
| chr5 | 1965420 | 1965462 | CSAR_peak_  | 9.58,8.39      | - |
| chr5 | 1965945 | 1966019 | CSAR_peak_  | 18.73,10.83    | - |
| chr5 | 1966266 | 1966301 | CSAR_peak_! | 10.83          | - |
| chr5 | 1966321 | 1966379 | CSAR_peak_  | 12.13          | - |
| chr5 | 1966553 | 1966630 | CSAR_peak_  | 15.43,11.63    | - |
| chr5 | 1966693 | 1966722 | CSAR_peak_  | 7.58           | - |
| chr5 | 1966772 | 1966853 | CSAR_peak_  | 19.36          | - |
| chr5 | 1990148 | 1990190 | CSAR_peak_  | 7.27           | - |
| chr5 | 1990434 | 1990488 | CSAR_peak_  | 9.58           | - |
| chr5 | 1991702 | 1991737 | CSAR_peak_  | 9.77           | - |
| chr5 | 1991964 | 1991994 | CSAR_peak_  | 7.27           | - |
| chr5 | 1994203 | 1994239 | CSAR_peak_  | 6.21           | - |
| chr5 | 1994413 | 1994455 | CSAR_peak_  | 6.57           | - |
| chr5 | 2003735 | 2003781 | CSAR_peak_  | 14.76          | - |
| chr5 | 2003953 | 2003957 | CSAR_peak_  | 7.27           | - |
| chr5 | 2005392 | 2005432 | CSAR_peak_  | 7.27           | - |
| chr5 | 2005596 | 2005667 | CSAR_peak_  | 8.39           | - |
| chr5 | 2011565 | 2011606 | CSAR_peak_  | 7.7            | - |
| chr5 | 2011699 | 2011734 | CSAR_peak_  | 10.83          | - |
| chr5 | 2012220 | 2012266 | CSAR_peak_  | 7.27           | - |
| chr5 | 2013361 | 2013433 | CSAR_peak_  | 6.21           | - |
| chr5 | 2016093 | 2016137 | CSAR_peak_  | 9.58           | - |
| chr5 | 2019135 | 2019177 | CSAR_peak_  | 6.21           | - |
| chr5 | 2019407 | 2019461 | CSAR_peak_! | 6.57           | - |
| chr5 | 2019522 | 2019603 | CSAR_peak_  | 12.13,9.58     | - |
| chr5 | 2019681 | 2019706 | CSAR_peak_  | 10.83          | - |
| chr5 | 2019715 | 2019802 | CSAR_peak_  | 14.88,8.65     | - |
| chr5 | 2019860 | 2019915 | CSAR_peak_  | 10.95          | - |
| chr5 | 2020246 | 2020332 | CSAR_peak_  | 13.85          | - |
| chr5 | 2020692 | 2020760 | CSAR_peak_  | 12.51,10.83    | - |
| chr5 | 2020910 | 2020976 | CSAR_peak_  | 11.96,5.86,1(- | - |
| chr5 | 2021060 | 2021120 | CSAR_peak_  | 12.54,12.12,!- | - |
| chr5 | 2021410 | 2021470 | CSAR_peak_  | 16.08,16.36    | - |
| chr5 | 2021541 | 2021600 | CSAR_peak_  | 6.44           | - |

|      |         |         |             |               |   |
|------|---------|---------|-------------|---------------|---|
| chr5 | 2021668 | 2021721 | CSAR_peak_  | 7.92,9.58     | - |
| chr5 | 2022015 | 2022088 | CSAR_peak_  | 7.27          | - |
| chr5 | 2022355 | 2022431 | CSAR_peak_  | 16.77,8.2,12. | - |
| chr5 | 2022855 | 2022972 | CSAR_peak_  | 26.69,11.63   | - |
| chr5 | 2023303 | 2023338 | CSAR_peak_  | 14.88,9.58    | - |
| chr5 | 2023362 | 2023433 | CSAR_peak_  | 20.94         | - |
| chr5 | 2023610 | 2023682 | CSAR_peak_  | 12.13,6.21    | - |
| chr5 | 2023849 | 2023910 | CSAR_peak_! | 7             | - |
| chr5 | 2023991 | 2024083 | CSAR_peak_  | 6.03,12.13    | - |
| chr5 | 2024227 | 2024306 | CSAR_peak_  | 6.21,10.95    | - |
| chr5 | 2024515 | 2024574 | CSAR_peak_  | 17.82         | - |
| chr5 | 2024914 | 2024965 | CSAR_peak_  | 8.39          | - |
| chr5 | 2024968 | 2024982 | CSAR_peak_  | 6.02          | - |
| chr5 | 2025001 | 2025058 | CSAR_peak_  | 7.27          | - |
| chr5 | 2026114 | 2026188 | CSAR_peak_  | 6.21,5.86     | - |
| chr5 | 2026355 | 2026405 | CSAR_peak_  | 10.83         | - |
| chr5 | 2026819 | 2026933 | CSAR_peak_  | 10.83,6.57    | - |
| chr5 | 2027142 | 2027254 | CSAR_peak_  | 23.89,22.58   | - |
| chr5 | 2027436 | 2027506 | CSAR_peak_  | 12.6,18.73    | - |
| chr5 | 2027805 | 2027851 | CSAR_peak_  | 6.21          | - |
| chr5 | 2049988 | 2050056 | CSAR_peak_  | 8.39          | - |
| chr5 | 2054598 | 2054649 | CSAR_peak_  | 12.13         | - |
| chr5 | 2056939 | 2056994 | CSAR_peak_  | 6.21          | - |
| chr5 | 2058877 | 2058929 | CSAR_peak_  | 12.13         | - |
| chr5 | 2060729 | 2060804 | CSAR_peak_  | 11.03         | - |
| chr5 | 2060899 | 2060950 | CSAR_peak_  | 7.27          | - |
| chr5 | 2061004 | 2061048 | CSAR_peak_  | 16.33,12.13   | - |
| chr5 | 2061133 | 2061256 | CSAR_peak_  | 20.18,22.69   | - |
| chr5 | 2061402 | 2061439 | CSAR_peak_  | 7.27          | - |
| chr5 | 2061468 | 2061520 | CSAR_peak_  | 8.39          | - |
| chr5 | 2061583 | 2061759 | CSAR_peak_  | 41.63,17.68   | - |
| chr5 | 2061797 | 2061851 | CSAR_peak_  | 6.02,9.58     | - |
| chr5 | 2061859 | 2061916 | CSAR_peak_  | 9.58          | - |
| chr5 | 2068520 | 2068602 | CSAR_peak_  | 8.28,9.77     | - |
| chr5 | 2069221 | 2069285 | CSAR_peak_  | 14.76,14.88   | - |
| chr5 | 2069469 | 2069501 | CSAR_peak_  | 7.27          | - |
| chr5 | 2090227 | 2090248 | CSAR_peak_  | 7.27          | - |
| chr5 | 2094374 | 2094448 | CSAR_peak_  | 17.82,8.39    | - |
| chr5 | 2094664 | 2094719 | CSAR_peak_  | 7.92,7.92     | - |
| chr5 | 2094744 | 2094797 | CSAR_peak_! | 7             | - |
| chr5 | 2095023 | 2095031 | CSAR_peak_  | 6.21          | - |
| chr5 | 2095049 | 2095092 | CSAR_peak_  | 7.27          | - |

|      |         |         |            |               |   |
|------|---------|---------|------------|---------------|---|
| chr5 | 2095618 | 2095738 | CSAR_peak_ | 12.13,12.13   | - |
| chr5 | 2096107 | 2096202 | CSAR_peak_ | 7.27,7.27     | - |
| chr5 | 2117960 | 2118027 | CSAR_peak_ | 6.21          | - |
| chr5 | 2118341 | 2118382 | CSAR_peak_ | 8.39          | - |
| chr5 | 2118462 | 2118514 | CSAR_peak_ | 7.27,13.48    | - |
| chr5 | 2132382 | 2132433 | CSAR_peak_ | 6.03          | - |
| chr5 | 2132482 | 2132620 | CSAR_peak_ | 8.14,12.13,9. | - |
| chr5 | 2132729 | 2132899 | CSAR_peak_ | 9.58,12.13,3. | - |
| chr5 | 2132920 | 2133136 | CSAR_peak_ | 11.14,23.49   | - |
| chr5 | 2133288 | 2133404 | CSAR_peak_ | 19.36,13.48   | - |
| chr5 | 2158497 | 2158541 | CSAR_peak_ | 12.13         | - |
| chr5 | 2158572 | 2158608 | CSAR_peak_ | 6.13          | - |
| chr5 | 2158707 | 2158759 | CSAR_peak_ | 5.92,7.18     | - |
| chr5 | 2158791 | 2158803 | CSAR_peak_ | 7.58          | - |
| chr5 | 2158890 | 2158960 | CSAR_peak_ | 6.81,14.88,1. | - |
| chr5 | 2159106 | 2159167 | CSAR_peak_ | 9.35,11.35    | - |
| chr5 | 2159407 | 2159514 | CSAR_peak_ | 17.4,9.41,14. | - |
| chr5 | 2159592 | 2159670 | CSAR_peak_ | 17.68         | - |
| chr5 | 2159805 | 2159901 | CSAR_peak_ | 21.94,9.77    | - |
| chr5 | 2160415 | 2160427 | CSAR_peak_ | 13.48         | - |
| chr5 | 2160852 | 2160894 | CSAR_peak_ | 14.88         | - |
| chr5 | 2161030 | 2161112 | CSAR_peak_ | 6.87,12.17    | - |
| chr5 | 2161246 | 2161386 | CSAR_peak_ | 9.58,10.83    | - |
| chr5 | 2161996 | 2162068 | CSAR_peak_ | 12.74,11.14   | - |
| chr5 | 2162466 | 2162522 | CSAR_peak_ | 12.31,14.88   | - |
| chr5 | 2162581 | 2162624 | CSAR_peak_ | 7.27          | - |
| chr5 | 2162638 | 2162685 | CSAR_peak_ | 8.39          | - |
| chr5 | 2162780 | 2162803 | CSAR_peak_ | 6.21          | - |
| chr5 | 2162831 | 2162882 | CSAR_peak_ | 7.27          | - |
| chr5 | 2163636 | 2163747 | CSAR_peak_ | 9.58          | - |
| chr5 | 2163837 | 2164005 | CSAR_peak_ | 19.98,37.55   | - |
| chr5 | 2164362 | 2164416 | CSAR_peak_ | 9.58,7.27     | - |
| chr5 | 2164651 | 2164697 | CSAR_peak_ | 9.58          | - |
| chr5 | 2165024 | 2165149 | CSAR_peak_ | 12.13,6.21    | - |
| chr5 | 2165554 | 2165594 | CSAR_peak_ | 12.31,8.39    | - |
| chr5 | 2165705 | 2165779 | CSAR_peak_ | 6.21          | - |
| chr5 | 2165868 | 2165881 | CSAR_peak_ | 12.17,13.48   | - |
| chr5 | 2165997 | 2166056 | CSAR_peak_ | 21.56,32.46   | - |
| chr5 | 2166178 | 2166215 | CSAR_peak_ | 28.34,10.83   | - |
| chr5 | 2182117 | 2182164 | CSAR_peak_ | 9.58,7.58     | - |
| chr5 | 2207090 | 2207157 | CSAR_peak_ | 8.39          | - |
| chr5 | 2208412 | 2208474 | CSAR_peak_ | 7.27          | - |

|      |         |         |            |              |    |
|------|---------|---------|------------|--------------|----|
| chr5 | 2320130 | 2320167 | CSAR_peak_ | 7.27         | -  |
| chr5 | 2320379 | 2320463 | CSAR_peak_ | 10.95,6.03   | -  |
| chr5 | 2320473 | 2320491 | CSAR_peak_ | 8.39         | -  |
| chr5 | 2320609 | 2320774 | CSAR_peak_ | 12.17,13.48, | (- |
| chr5 | 2321201 | 2321260 | CSAR_peak_ | 11.38        | -  |
| chr5 | 2321355 | 2321439 | CSAR_peak_ | 23.03,11.14  | -  |
| chr5 | 2321510 | 2321562 | CSAR_peak_ | 9.58         | -  |
| chr5 | 2321615 | 2321708 | CSAR_peak_ | 20.18,11.45  | -  |
| chr5 | 2321791 | 2321889 | CSAR_peak_ | 16.33,16.11  | -  |
| chr5 | 2322443 | 2322492 | CSAR_peak_ | 12.17,9.58   | -  |
| chr5 | 2322569 | 2322660 | CSAR_peak_ | 36.78,25.91  | -  |
| chr5 | 2322858 | 2322907 | CSAR_peak_ | 12.13        | -  |
| chr5 | 2322909 | 2322982 | CSAR_peak_ | 7.27         | -  |
| chr5 | 2323297 | 2323366 | CSAR_peak_ | 8.14,9.58    | -  |
| chr5 | 2323604 | 2323648 | CSAR_peak_ | 6.21         | -  |
| chr5 | 2323845 | 2323958 | CSAR_peak_ | 10.02,6.21   | -  |
| chr5 | 2324312 | 2324340 | CSAR_peak_ | 9.27         | -  |
| chr5 | 2324479 | 2324531 | CSAR_peak_ | 10.83        | -  |
| chr5 | 2324857 | 2324885 | CSAR_peak_ | 6.78         | -  |
| chr5 | 2324888 | 2324923 | CSAR_peak_ | 6.72         | -  |
| chr5 | 2328072 | 2328095 | CSAR_peak_ | 6.85         | -  |
| chr5 | 2361013 | 2361073 | CSAR_peak_ | 7.27         | -  |
| chr5 | 2362951 | 2363040 | CSAR_peak_ | 7.58,13.48   | -  |
| chr5 | 2393673 | 2393723 | CSAR_peak_ | 10.83        | -  |
| chr5 | 2393975 | 2394035 | CSAR_peak_ | 6.21         | -  |
| chr5 | 2395037 | 2395083 | CSAR_peak_ | 8.39         | -  |
| chr5 | 2458601 | 2458643 | CSAR_peak_ | 7.27         | -  |
| chr5 | 2458686 | 2458746 | CSAR_peak_ | 12.17,5.86   | -  |
| chr5 | 2459170 | 2459265 | CSAR_peak_ | 9.58,7.58    | -  |
| chr5 | 2459527 | 2459573 | CSAR_peak_ | 9.32         | -  |
| chr5 | 2459831 | 2459916 | CSAR_peak_ | 12.31,8.39   | -  |
| chr5 | 2459993 | 2460044 | CSAR_peak_ | 8.39         | -  |
| chr5 | 2460180 | 2460254 | CSAR_peak_ | 6.21         | -  |
| chr5 | 2460388 | 2460442 | CSAR_peak_ | 8.61         | -  |
| chr5 | 2460551 | 2460590 | CSAR_peak_ | 6.21         | -  |
| chr5 | 2460750 | 2460795 | CSAR_peak_ | 8.39,7.27    | -  |
| chr5 | 2460901 | 2460966 | CSAR_peak_ | 16.11        | -  |
| chr5 | 2461104 | 2461203 | CSAR_peak_ | 9.58,14.85   | -  |
| chr5 | 2461301 | 2461373 | CSAR_peak_ | 8.28,10.02   | -  |
| chr5 | 2461783 | 2461859 | CSAR_peak_ | 14.08,13.85  | -  |
| chr5 | 2462043 | 2462130 | CSAR_peak_ | 12.13,16.11  | -  |
| chr5 | 2464689 | 2464765 | CSAR_peak_ | 9.58         | -  |

|      |         |         |            |                |   |
|------|---------|---------|------------|----------------|---|
| chr5 | 2464955 | 2465025 | CSAR_peak_ | 10.83,13.48    | - |
| chr5 | 2466508 | 2466542 | CSAR_peak_ | 6.21           | - |
| chr5 | 2466705 | 2466743 | CSAR_peak_ | 12.17          | - |
| chr5 | 2466907 | 2466957 | CSAR_peak_ | 12.13,7.27     | - |
| chr5 | 2495248 | 2495303 | CSAR_peak_ | 7.27           | - |
| chr5 | 2499635 | 2499707 | CSAR_peak_ | 6.21           | - |
| chr5 | 2506993 | 2507068 | CSAR_peak_ | 10.83          | - |
| chr5 | 2507290 | 2507340 | CSAR_peak_ | 6.21           | - |
| chr5 | 2517583 | 2517667 | CSAR_peak_ | 8.92,6.57      | - |
| chr5 | 2517871 | 2517982 | CSAR_peak_ | 25.62,7.34     | - |
| chr5 | 2518024 | 2518063 | CSAR_peak_ | 12.74          | - |
| chr5 | 2518122 | 2518212 | CSAR_peak_ | 14.88,5.86,7.- | - |
| chr5 | 2518390 | 2518431 | CSAR_peak_ | 6.03           | - |
| chr5 | 2518717 | 2518791 | CSAR_peak_ | 12.13,12.13    | - |
| chr5 | 2518797 | 2518937 | CSAR_peak_ | 10.83,25.62    | - |
| chr5 | 2519010 | 2519049 | CSAR_peak_ | 7.27           | - |
| chr5 | 2519219 | 2519330 | CSAR_peak_ | 14.88,12.13    | - |
| chr5 | 2519389 | 2519513 | CSAR_peak_ | 14.85          | - |
| chr5 | 2519534 | 2519601 | CSAR_peak_ | 7.27           | - |
| chr5 | 2519913 | 2519956 | CSAR_peak_ | 9.58           | - |
| chr5 | 2519998 | 2520051 | CSAR_peak_ | 9.58,12.13     | - |
| chr5 | 2520275 | 2520382 | CSAR_peak_ | 20.18,8.13,8.- | - |
| chr5 | 2520405 | 2520751 | CSAR_peak_ | 17.82,8.14,2.- | - |
| chr5 | 2521162 | 2521209 | CSAR_peak_ | 7.27           | - |
| chr5 | 2521288 | 2521359 | CSAR_peak_ | 7.27           | - |
| chr5 | 2521678 | 2521747 | CSAR_peak_ | 7.27           | - |
| chr5 | 2521768 | 2521840 | CSAR_peak_ | 13.85          | - |
| chr5 | 2521927 | 2522067 | CSAR_peak_ | 13.48,6.03,1(- | - |
| chr5 | 2522386 | 2522450 | CSAR_peak_ | 9.27,7.27,7.9- | - |
| chr5 | 2522929 | 2522980 | CSAR_peak_ | 9.58           | - |
| chr5 | 2522996 | 2523063 | CSAR_peak_ | 19.36          | - |
| chr5 | 2523074 | 2523134 | CSAR_peak_ | 19.36          | - |
| chr5 | 2523187 | 2523227 | CSAR_peak_ | 6.21           | - |
| chr5 | 2523252 | 2523302 | CSAR_peak_ | 7.58           | - |
| chr5 | 2523340 | 2523422 | CSAR_peak_ | 17.82,12.13    | - |
| chr5 | 2523441 | 2523515 | CSAR_peak_ | 14.76          | - |
| chr5 | 2523632 | 2523829 | CSAR_peak_ | 16.55,20.12    | - |
| chr5 | 2523926 | 2523975 | CSAR_peak_ | 15,20.43       | - |
| chr5 | 2524196 | 2524405 | CSAR_peak_ | 38.71,12.13,-  | - |
| chr5 | 2524510 | 2524630 | CSAR_peak_ | 27.94,21.94    | - |
| chr5 | 2524682 | 2524734 | CSAR_peak_ | 8.39           | - |
| chr5 | 2524819 | 2524871 | CSAR_peak_ | 25.91,13.66    | - |

|      |         |         |            |               |   |
|------|---------|---------|------------|---------------|---|
| chr5 | 2524910 | 2525120 | CSAR_peak_ | 24.21,10.83   | - |
| chr5 | 2525194 | 2525347 | CSAR_peak_ | 13.48,25.91   | - |
| chr5 | 2525445 | 2525518 | CSAR_peak_ | 7.27          | - |
| chr5 | 2525526 | 2525848 | CSAR_peak_ | 14.73,38.8,9. | - |
| chr5 | 2525899 | 2526146 | CSAR_peak_ | 17.82,12.13,  | - |
| chr5 | 2526147 | 2526208 | CSAR_peak_ | 33.47,42.64   | - |
| chr5 | 2526280 | 2526330 | CSAR_peak_ | 16.25,16.77   | - |
| chr5 | 2526340 | 2526449 | CSAR_peak_ | 17.82,21.24,  | - |
| chr5 | 2526641 | 2526678 | CSAR_peak_ | 7.27          | - |
| chr5 | 2526745 | 2526869 | CSAR_peak_ | 34.04,21.81   | - |
| chr5 | 2526968 | 2527047 | CSAR_peak_ | 12.13,9.58    | - |
| chr5 | 2527086 | 2527164 | CSAR_peak_ | 14.88,11.03   | - |
| chr5 | 2527227 | 2527569 | CSAR_peak_ | 21.35,15.64,  | - |
| chr5 | 2527575 | 2527789 | CSAR_peak_ | 12.13,7.26,1  | - |
| chr5 | 2527886 | 2527912 | CSAR_peak_ | 6.44          | - |
| chr5 | 2527947 | 2527996 | CSAR_peak_ | 12.54         | - |
| chr5 | 2528181 | 2528260 | CSAR_peak_ | 17.87,31.72   | - |
| chr5 | 2528267 | 2528508 | CSAR_peak_ | 24.82,17.4    | - |
| chr5 | 2528525 | 2528686 | CSAR_peak_ | 12.38,30.8,9. | - |
| chr5 | 2528714 | 2528922 | CSAR_peak_ | 42.97,54.4    | - |
| chr5 | 2528981 | 2529112 | CSAR_peak_ | 18.73,18.1    | - |
| chr5 | 2529148 | 2529291 | CSAR_peak_ | 54.56,6.03,2  | - |
| chr5 | 2544841 | 2544868 | CSAR_peak_ | 6.21          | - |
| chr5 | 2549730 | 2549782 | CSAR_peak_ | 12.13,8.39    | - |
| chr5 | 2600797 | 2600899 | CSAR_peak_ | 19.36,6.03    | - |
| chr5 | 2601440 | 2601525 | CSAR_peak_ | 12.13         | - |
| chr5 | 2602628 | 2602697 | CSAR_peak_ | 6.21          | - |
| chr5 | 2606635 | 2606745 | CSAR_peak_ | 26.69,7.73    | - |
| chr5 | 2606907 | 2606968 | CSAR_peak_ | 31.73         | - |
| chr5 | 2607050 | 2607073 | CSAR_peak_ | 24.21         | - |
| chr5 | 2607134 | 2607212 | CSAR_peak_ | 13.48,25.91   | - |
| chr5 | 2607499 | 2607538 | CSAR_peak_ | 6.57,6.21     | - |
| chr5 | 2607720 | 2607762 | CSAR_peak_ | 9.61          | - |
| chr5 | 2607835 | 2607941 | CSAR_peak_ | 14.91,25.34,  | - |
| chr5 | 2608059 | 2608100 | CSAR_peak_ | 17.82         | - |
| chr5 | 2608176 | 2608251 | CSAR_peak_ | 7.27,12.59    | - |
| chr5 | 2608338 | 2608404 | CSAR_peak_ | 6.37,10.96    | - |
| chr5 | 2608596 | 2608651 | CSAR_peak_ | 6.57,25.07    | - |
| chr5 | 2608783 | 2608906 | CSAR_peak_ | 11.99,16.33   | - |
| chr5 | 2609317 | 2609373 | CSAR_peak_ | 12.13         | - |
| chr5 | 2620737 | 2620839 | CSAR_peak_ | 7.27          | - |
| chr5 | 2622468 | 2622588 | CSAR_peak_ | 6.21,12.13    | - |

|      |         |         |            |                |
|------|---------|---------|------------|----------------|
| chr5 | 2632297 | 2632454 | CSAR_peak_ | 34.5,53.9,27.- |
| chr5 | 2632520 | 2632666 | CSAR_peak_ | 5.79,28.65,4.- |
| chr5 | 2632769 | 2632912 | CSAR_peak_ | 6.48,44.53,7!- |
| chr5 | 2641342 | 2641391 | CSAR_peak_ | 17.51 -        |
| chr5 | 2641948 | 2641998 | CSAR_peak_ | 9.58 -         |
| chr5 | 2642501 | 2642572 | CSAR_peak_ | 25.34,8.92 -   |
| chr5 | 2642881 | 2642940 | CSAR_peak_ | 10.02,6.44 -   |
| chr5 | 2645716 | 2645767 | CSAR_peak_ | 6.21 -         |
| chr5 | 2646491 | 2646593 | CSAR_peak_ | 7.27,8.39 -    |
| chr5 | 2647101 | 2647143 | CSAR_peak_ | 7.27 -         |
| chr5 | 2648048 | 2648082 | CSAR_peak_ | 7.27 -         |
| chr5 | 2648138 | 2648196 | CSAR_peak_ | 7.27 -         |
| chr5 | 2648469 | 2648562 | CSAR_peak_ | 17.82 -        |
| chr5 | 2649268 | 2649313 | CSAR_peak_ | 6.21 -         |
| chr5 | 2651770 | 2651827 | CSAR_peak_ | 17.82 -        |
| chr5 | 2651996 | 2652164 | CSAR_peak_ | 9.58,14.88,6.- |
| chr5 | 2664016 | 2664058 | CSAR_peak_ | 9.58 -         |
| chr5 | 2664193 | 2664226 | CSAR_peak_ | 7.27 -         |
| chr5 | 2664264 | 2664300 | CSAR_peak_ | 6.21 -         |
| chr5 | 2664895 | 2664992 | CSAR_peak_ | 12.74,14.88 -  |
| chr5 | 2665356 | 2665443 | CSAR_peak_ | 7.27 -         |
| chr5 | 2692175 | 2692245 | CSAR_peak_ | 10.02,8.39 -   |
| chr5 | 2692333 | 2692347 | CSAR_peak_ | 6.21,7.27 -    |
| chr5 | 2692714 | 2692765 | CSAR_peak_ | 7.27,8.39 -    |
| chr5 | 2711227 | 2711275 | CSAR_peak_ | 8.39 -         |
| chr5 | 2711852 | 2711939 | CSAR_peak_ | 9.77 -         |
| chr5 | 2712368 | 2712407 | CSAR_peak_ | 5.86 -         |
| chr5 | 2728376 | 2728440 | CSAR_peak_ | 9.58,14.88 -   |
| chr5 | 2728951 | 2729016 | CSAR_peak_ | 7.73,13.48 -   |
| chr5 | 2729037 | 2729063 | CSAR_peak_ | 7.27 -         |
| chr5 | 2729193 | 2729222 | CSAR_peak_ | 6.21 -         |
| chr5 | 2730906 | 2730975 | CSAR_peak_ | 14.88,16.33 -  |
| chr5 | 2731059 | 2731109 | CSAR_peak_ | 19.36 -        |
| chr5 | 2731160 | 2731301 | CSAR_peak_ | 14.88 -        |
| chr5 | 2731345 | 2731575 | CSAR_peak_ | 5.86,12.13 -   |
| chr5 | 2731667 | 2731765 | CSAR_peak_ | 19.36,7.27 -   |
| chr5 | 2731948 | 2732022 | CSAR_peak_ | 13.48 -        |
| chr5 | 2755638 | 2755714 | CSAR_peak_ | 8.39 -         |
| chr5 | 2757352 | 2757431 | CSAR_peak_ | 19.98,13.85 -  |
| chr5 | 2757471 | 2757694 | CSAR_peak_ | 7.26,12.13,1!- |
| chr5 | 2759852 | 2759914 | CSAR_peak_ | 6.94,8.65 -    |
| chr5 | 2760006 | 2760053 | CSAR_peak_ | 7.31 -         |



|      |         |         |             |                |   |
|------|---------|---------|-------------|----------------|---|
| chr5 | 2760075 | 2760112 | CSAR_peak_  | 7.27           | - |
| chr5 | 2767119 | 2767167 | CSAR_peak_  | 8.39           | - |
| chr5 | 2769729 | 2769787 | CSAR_peak_  | 7.27           | - |
| chr5 | 2771174 | 2771251 | CSAR_peak_  | 7.7,6.21       | - |
| chr5 | 2771746 | 2771800 | CSAR_peak_  | 9.58,7.58      | - |
| chr5 | 2772072 | 2772127 | CSAR_peak_! | 9.48           | - |
| chr5 | 2772136 | 2772175 | CSAR_peak_  | 6.85           | - |
| chr5 | 2772217 | 2772266 | CSAR_peak_  | 6.21           | - |
| chr5 | 2773550 | 2773599 | CSAR_peak_  | 7.27           | - |
| chr5 | 2773746 | 2773801 | CSAR_peak_  | 9.58           | - |
| chr5 | 2773804 | 2773858 | CSAR_peak_  | 7.58,7.58      | - |
| chr5 | 2799092 | 2799149 | CSAR_peak_  | 14.88          | - |
| chr5 | 2799794 | 2799886 | CSAR_peak_  | 14.22          | - |
| chr5 | 2801741 | 2801795 | CSAR_peak_  | 8.39           | - |
| chr5 | 2807745 | 2807789 | CSAR_peak_  | 6.21           | - |
| chr5 | 2807798 | 2807845 | CSAR_peak_  | 7.27           | - |
| chr5 | 2808220 | 2808292 | CSAR_peak_  | 7.92           | - |
| chr5 | 2808526 | 2808537 | CSAR_peak_  | 7.58           | - |
| chr5 | 2809499 | 2809570 | CSAR_peak_! | 5.86,8.14      | - |
| chr5 | 2811143 | 2811178 | CSAR_peak_  | 9.61           | - |
| chr5 | 2812717 | 2812803 | CSAR_peak_  | 10.31          | - |
| chr5 | 2818219 | 2818258 | CSAR_peak_  | 6.21           | - |
| chr5 | 2818838 | 2818888 | CSAR_peak_  | 6.21           | - |
| chr5 | 2819495 | 2819598 | CSAR_peak_  | 12.13,8.39     | - |
| chr5 | 2820114 | 2820206 | CSAR_peak_  | 9.58,12.13,6.- | - |
| chr5 | 2820283 | 2820329 | CSAR_peak_  | 7.27,7.27      | - |
| chr5 | 2820338 | 2820359 | CSAR_peak_  | 7.27           | - |
| chr5 | 2820676 | 2820727 | CSAR_peak_  | 14.88          | - |
| chr5 | 2820836 | 2820882 | CSAR_peak_  | 13.48          | - |
| chr5 | 2836382 | 2836428 | CSAR_peak_  | 7.27           | - |
| chr5 | 2837101 | 2837178 | CSAR_peak_  | 8.65           | - |
| chr5 | 2849287 | 2849361 | CSAR_peak_  | 10.83,7.27     | - |
| chr5 | 2849399 | 2849505 | CSAR_peak_  | 14.76,6.03     | - |
| chr5 | 2849557 | 2849592 | CSAR_peak_  | 7.27           | - |
| chr5 | 2849655 | 2849698 | CSAR_peak_  | 6.44,13.48     | - |
| chr5 | 2849734 | 2849819 | CSAR_peak_  | 6.03           | - |
| chr5 | 2850060 | 2850125 | CSAR_peak_  | 12.13          | - |
| chr5 | 2850288 | 2850383 | CSAR_peak_  | 6.21,8.39      | - |
| chr5 | 2850541 | 2850607 | CSAR_peak_  | 9.77,12.13     | - |
| chr5 | 2850722 | 2850771 | CSAR_peak_  | 6.03,6.02      | - |
| chr5 | 2850876 | 2850948 | CSAR_peak_! | 5.86,14.88     | - |
| chr5 | 2858866 | 2858908 | CSAR_peak_  | 7.27           | - |

|      |         |         |            |               |   |
|------|---------|---------|------------|---------------|---|
| chr5 | 2858983 | 2859027 | CSAR_peak_ | 13.44,8.39    | - |
| chr5 | 2859064 | 2859123 | CSAR_peak_ | 8.28          | - |
| chr5 | 2859213 | 2859586 | CSAR_peak_ | 16.25,16.33,  | - |
| chr5 | 2859615 | 2859818 | CSAR_peak_ | 26.37,6.44,14 | - |
| chr5 | 2859820 | 2859858 | CSAR_peak_ | 10.02         | - |
| chr5 | 2859903 | 2859964 | CSAR_peak_ | 6.03,10.95    | - |
| chr5 | 2860049 | 2860249 | CSAR_peak_ | 37.55,19.36,  | - |
| chr5 | 2874657 | 2874750 | CSAR_peak_ | 6.81,8.28,8.2 | - |
| chr5 | 2874765 | 2874796 | CSAR_peak_ | 6.21          | - |
| chr5 | 2875079 | 2875124 | CSAR_peak_ | 8.39          | - |
| chr5 | 2875439 | 2875481 | CSAR_peak_ | 7.27          | - |
| chr5 | 2875970 | 2876010 | CSAR_peak_ | 14.88         | - |
| chr5 | 2876011 | 2876107 | CSAR_peak_ | 13.72,13.44   | - |
| chr5 | 2876234 | 2876418 | CSAR_peak_ | 9.58,13.48,10 | - |
| chr5 | 2876480 | 2876548 | CSAR_peak_ | 7.92,7.27     | - |
| chr5 | 2894364 | 2894416 | CSAR_peak_ | 10.83         | - |
| chr5 | 2912852 | 2912893 | CSAR_peak_ | 7.27          | - |
| chr5 | 2945901 | 2945953 | CSAR_peak_ | 7.27          | - |
| chr5 | 2960318 | 2960393 | CSAR_peak_ | 7.27          | - |
| chr5 | 2993693 | 2993718 | CSAR_peak_ | 13.72         | - |
| chr5 | 2993810 | 2993879 | CSAR_peak_ | 17.28         | - |
| chr5 | 2993893 | 2993942 | CSAR_peak_ | 6.21          | - |
| chr5 | 2994169 | 2994259 | CSAR_peak_ | 12.13         | - |
| chr5 | 2994386 | 2994447 | CSAR_peak_ | 6.22,6.57     | - |
| chr5 | 2994750 | 2994863 | CSAR_peak_ | 7.27,10.31    | - |
| chr5 | 2994951 | 2995010 | CSAR_peak_ | 12.13,10.83   | - |
| chr5 | 2995108 | 2995187 | CSAR_peak_ | 9.97          | - |
| chr5 | 2995496 | 2995582 | CSAR_peak_ | 29.28,25.02   | - |
| chr5 | 2995732 | 2995814 | CSAR_peak_ | 17.82         | - |
| chr5 | 2996392 | 2996443 | CSAR_peak_ | 9.77          | - |
| chr5 | 2996476 | 2996650 | CSAR_peak_ | 8.39,5.86,9.2 | - |
| chr5 | 2996848 | 2996926 | CSAR_peak_ | 8.65,8.39     | - |
| chr5 | 2997026 | 2997078 | CSAR_peak_ | 6.21          | - |
| chr5 | 2997263 | 2997325 | CSAR_peak_ | 8.65,11.14,6. | - |
| chr5 | 2998015 | 2998096 | CSAR_peak_ | 19.36         | - |
| chr5 | 2998813 | 2998858 | CSAR_peak_ | 9.58          | - |
| chr5 | 3001502 | 3001551 | CSAR_peak_ | 12.13         | - |
| chr5 | 3002133 | 3002179 | CSAR_peak_ | 7.58          | - |
| chr5 | 3063490 | 3063534 | CSAR_peak_ | 9.58          | - |
| chr5 | 3063559 | 3063601 | CSAR_peak_ | 13.48,8.65    | - |
| chr5 | 3063693 | 3063791 | CSAR_peak_ | 12.31,19.36   | - |
| chr5 | 3063860 | 3063873 | CSAR_peak_ | 6.03          | - |

|      |         |         |            |                |   |
|------|---------|---------|------------|----------------|---|
| chr5 | 3063944 | 3064000 | CSAR_peak_ | 7.27           | - |
| chr5 | 3064340 | 3064402 | CSAR_peak_ | 7.27           | - |
| chr5 | 3064809 | 3064875 | CSAR_peak_ | 11.14          | - |
| chr5 | 3064911 | 3065025 | CSAR_peak_ | 11.03          | - |
| chr5 | 3065046 | 3065069 | CSAR_peak_ | 9.61           | - |
| chr5 | 3065159 | 3065201 | CSAR_peak_ | 7.27,7.27      | - |
| chr5 | 3081763 | 3081809 | CSAR_peak_ | 12.13,11.66    | - |
| chr5 | 3081818 | 3081871 | CSAR_peak_ | 6.03           | - |
| chr5 | 3081959 | 3082063 | CSAR_peak_ | 16.08,19.36    | - |
| chr5 | 3082150 | 3082221 | CSAR_peak_ | 17.4,15.68     | - |
| chr5 | 3082293 | 3082331 | CSAR_peak_ | 6.85           | - |
| chr5 | 3082430 | 3082495 | CSAR_peak_ | 13.51,19.96    | - |
| chr5 | 3082580 | 3082664 | CSAR_peak_ | 13.85,6.03     | - |
| chr5 | 3082757 | 3082835 | CSAR_peak_ | 11.38          | - |
| chr5 | 3082915 | 3083002 | CSAR_peak_ | 22.52,22.52    | - |
| chr5 | 3083116 | 3083330 | CSAR_peak_ | 38.89,22.69,-  | - |
| chr5 | 3083723 | 3083771 | CSAR_peak_ | 10.83          | - |
| chr5 | 3083920 | 3083985 | CSAR_peak_ | 8.09,12.35     | - |
| chr5 | 3084542 | 3084636 | CSAR_peak_ | 17.4,13.72,8.- | - |
| chr5 | 3084731 | 3085109 | CSAR_peak_ | 31.29,25.34,-  | - |
| chr5 | 3085142 | 3085225 | CSAR_peak_ | 26.92,23.16    | - |
| chr5 | 3085827 | 3085903 | CSAR_peak_ | 6.57,7.27      | - |
| chr5 | 3085952 | 3085997 | CSAR_peak_ | 7.58           | - |
| chr5 | 3086144 | 3086220 | CSAR_peak_ | 10.31,9.58     | - |
| chr5 | 3086253 | 3086303 | CSAR_peak_ | 12.13          | - |
| chr5 | 3086865 | 3086931 | CSAR_peak_ | 6.54           | - |
| chr5 | 3087088 | 3087167 | CSAR_peak_ | 9.58           | - |
| chr5 | 3087202 | 3087253 | CSAR_peak_ | 12.13,6.21     | - |
| chr5 | 3087371 | 3087414 | CSAR_peak_ | 7.27           | - |
| chr5 | 3087422 | 3087499 | CSAR_peak_ | 21.94,13.29    | - |
| chr5 | 3087910 | 3087988 | CSAR_peak_ | 25.91,6.21     | - |
| chr5 | 3088179 | 3088234 | CSAR_peak_ | 10.02,17.82    | - |
| chr5 | 3088395 | 3088479 | CSAR_peak_ | 17.51,12.74    | - |
| chr5 | 3088673 | 3088816 | CSAR_peak_ | 12.13,21.94    | - |
| chr5 | 3088822 | 3088879 | CSAR_peak_ | 14.88          | - |
| chr5 | 3089548 | 3089604 | CSAR_peak_ | 7.58,6.57      | - |
| chr5 | 3089996 | 3090057 | CSAR_peak_ | 9.58           | - |
| chr5 | 3091145 | 3091187 | CSAR_peak_ | 6.21           | - |
| chr5 | 3091271 | 3091329 | CSAR_peak_ | 7.58           | - |
| chr5 | 3091463 | 3091555 | CSAR_peak_ | 10.7,17.82     | - |
| chr5 | 3092225 | 3092287 | CSAR_peak_ | 7.27,8.95      | - |
| chr5 | 3092297 | 3092340 | CSAR_peak_ | 8.39           | - |

|      |         |         |             |               |   |
|------|---------|---------|-------------|---------------|---|
| chr5 | 3111011 | 3111065 | CSAR_peak_  | 29.61,23.95   | - |
| chr5 | 3137613 | 3137810 | CSAR_peak_  | 13.44,6.85,7. | - |
| chr5 | 3137894 | 3138024 | CSAR_peak_  | 10.02,6.21    | - |
| chr5 | 3138220 | 3138259 | CSAR_peak_  | 7.27          | - |
| chr5 | 3138439 | 3138488 | CSAR_peak_  | 12.59,11.66,: | - |
| chr5 | 3138558 | 3138584 | CSAR_peak_  | 20.94,6.21    | - |
| chr5 | 3138585 | 3138622 | CSAR_peak_  | 7.27          | - |
| chr5 | 3138691 | 3138723 | CSAR_peak_  | 6.95          | - |
| chr5 | 3138847 | 3138902 | CSAR_peak_! | 10.82         | - |
| chr5 | 3139153 | 3139232 | CSAR_peak_  | 29.4,7.34     | - |
| chr5 | 3139281 | 3139306 | CSAR_peak_  | 8.39          | - |
| chr5 | 3139991 | 3140037 | CSAR_peak_  | 9.58          | - |
| chr5 | 3146778 | 3146924 | CSAR_peak_  | 12.13,10.83   | - |
| chr5 | 3146990 | 3147076 | CSAR_peak_! | 10.95,15.43,: | - |
| chr5 | 3147227 | 3147304 | CSAR_peak_  | 16.11,6.81,7. | - |
| chr5 | 3147339 | 3147358 | CSAR_peak_  | 6.21          | - |
| chr5 | 3147377 | 3147452 | CSAR_peak_  | 8.14          | - |
| chr5 | 3147606 | 3147652 | CSAR_peak_  | 9.58,8.14     | - |
| chr5 | 3147780 | 3147854 | CSAR_peak_  | 9.77,17.82    | - |
| chr5 | 3236471 | 3236604 | CSAR_peak_  | 13.48,9.27,1: | - |
| chr5 | 3236706 | 3236760 | CSAR_peak_  | 15.9,7,7.27   | - |
| chr5 | 3237521 | 3237576 | CSAR_peak_  | 7.27          | - |
| chr5 | 3237884 | 3237926 | CSAR_peak_  | 9.58          | - |
| chr5 | 3253124 | 3253243 | CSAR_peak_  | 39.53,31.78   | - |
| chr5 | 3255622 | 3255684 | CSAR_peak_  | 24.21,6.03    | - |
| chr5 | 3256022 | 3256075 | CSAR_peak_  | 10.83,14.88   | - |
| chr5 | 3256107 | 3256214 | CSAR_peak_  | 12.17         | - |
| chr5 | 3257230 | 3257278 | CSAR_peak_  | 6.81          | - |
| chr5 | 3257443 | 3257543 | CSAR_peak_  | 12.13,10.82   | - |
| chr5 | 3257636 | 3257711 | CSAR_peak_  | 14.88,16.33,: | - |
| chr5 | 3258838 | 3258888 | CSAR_peak_  | 10.02         | - |
| chr5 | 3259120 | 3259204 | CSAR_peak_  | 12.13         | - |
| chr5 | 3259488 | 3259548 | CSAR_peak_  | 7.36          | - |
| chr5 | 3259632 | 3259662 | CSAR_peak_  | 6.1           | - |
| chr5 | 3259972 | 3260033 | CSAR_peak_  | 23.03         | - |
| chr5 | 3281919 | 3281967 | CSAR_peak_  | 7.27          | - |
| chr5 | 3282122 | 3282218 | CSAR_peak_  | 25.91,9.77    | - |
| chr5 | 3283883 | 3283990 | CSAR_peak_  | 13.48,9.58    | - |
| chr5 | 3283997 | 3284223 | CSAR_peak_  | 40.54,34.93   | - |
| chr5 | 3284259 | 3284385 | CSAR_peak_  | 22.56,12.13   | - |
| chr5 | 3284455 | 3284566 | CSAR_peak_  | 35.24,16.11,: | - |
| chr5 | 3284636 | 3284665 | CSAR_peak_  | 6.21          | - |

|      |         |         |            |               |   |
|------|---------|---------|------------|---------------|---|
| chr5 | 3284668 | 3284882 | CSAR_peak_ | 10.64,8.5,29. | - |
| chr5 | 3285015 | 3285128 | CSAR_peak_ | 11.35,12.74   | - |
| chr5 | 3285196 | 3285257 | CSAR_peak_ | 7.27,14.88    | - |
| chr5 | 3285381 | 3285437 | CSAR_peak_ | 11.38,24.21   | - |
| chr5 | 3285468 | 3285554 | CSAR_peak_ | 16.02,17.36   | - |
| chr5 | 3285585 | 3285628 | CSAR_peak_ | 9.77          | - |
| chr5 | 3285696 | 3285760 | CSAR_peak_ | 19.36,34.89   | - |
| chr5 | 3285776 | 3285928 | CSAR_peak_ | 26.58,37.55   | - |
| chr5 | 3285986 | 3286005 | CSAR_peak_ | 9.58          | - |
| chr5 | 3286040 | 3286108 | CSAR_peak_ | 7.47,8.12     | - |
| chr5 | 3286160 | 3286262 | CSAR_peak_ | 16.11,21.35   | - |
| chr5 | 3291778 | 3291823 | CSAR_peak_ | 6.21          | - |
| chr5 | 3291927 | 3291989 | CSAR_peak_ | 7.27          | - |
| chr5 | 3293479 | 3293530 | CSAR_peak_ | 12.13         | - |
| chr5 | 3294034 | 3294063 | CSAR_peak_ | 9.58          | - |
| chr5 | 3294082 | 3294107 | CSAR_peak_ | 6.44          | - |
| chr5 | 3294291 | 3294344 | CSAR_peak_ | 10.83         | - |
| chr5 | 3294943 | 3295011 | CSAR_peak_ | 10.83         | - |
| chr5 | 3295259 | 3295324 | CSAR_peak_ | 10.83         | - |
| chr5 | 3296373 | 3296420 | CSAR_peak_ | 7.27          | - |
| chr5 | 3296737 | 3296787 | CSAR_peak_ | 6.21          | - |
| chr5 | 3296835 | 3296859 | CSAR_peak_ | 7.27          | - |
| chr5 | 3297039 | 3297078 | CSAR_peak_ | 6.21,7.27     | - |
| chr5 | 3298826 | 3298892 | CSAR_peak_ | 7.34,6.21     | - |
| chr5 | 3299846 | 3299877 | CSAR_peak_ | 12.13         | - |
| chr5 | 3300431 | 3300496 | CSAR_peak_ | 7.92          | - |
| chr5 | 3300640 | 3300705 | CSAR_peak_ | 12.17         | - |
| chr5 | 3333559 | 3333613 | CSAR_peak_ | 12.13         | - |
| chr5 | 3333684 | 3333734 | CSAR_peak_ | 10.95         | - |
| chr5 | 3337686 | 3337728 | CSAR_peak_ | 6.21          | - |
| chr5 | 3374771 | 3374847 | CSAR_peak_ | 6.95          | - |
| chr5 | 3375272 | 3375332 | CSAR_peak_ | 10.02         | - |
| chr5 | 3375911 | 3375955 | CSAR_peak_ | 8.39          | - |
| chr5 | 3376325 | 3376387 | CSAR_peak_ | 6.21          | - |
| chr5 | 3404430 | 3404525 | CSAR_peak_ | 9.58          | - |
| chr5 | 3416784 | 3416826 | CSAR_peak_ | 7.27          | - |
| chr5 | 3422022 | 3422092 | CSAR_peak_ | 12.13         | - |
| chr5 | 3423364 | 3423454 | CSAR_peak_ | 7.27,6.21     | - |
| chr5 | 3425852 | 3425962 | CSAR_peak_ | 14.88,7.27    | - |
| chr5 | 3426173 | 3426237 | CSAR_peak_ | 7.27          | - |
| chr5 | 3426400 | 3426475 | CSAR_peak_ | 15.43,8.65    | - |
| chr5 | 3426531 | 3426568 | CSAR_peak_ | 5.86,9.58     | - |

|      |         |         |            |              |   |
|------|---------|---------|------------|--------------|---|
| chr5 | 3426803 | 3426885 | CSAR_peak_ | 9.58,8.65    | - |
| chr5 | 3427023 | 3427106 | CSAR_peak_ | 8.13         | - |
| chr5 | 3427763 | 3427822 | CSAR_peak_ | 14.88,9.58   | - |
| chr5 | 3427976 | 3428033 | CSAR_peak_ | 7.27         | - |
| chr5 | 3428992 | 3429231 | CSAR_peak_ | 30.53,17.82, | - |
| chr5 | 3429237 | 3429353 | CSAR_peak_ | 30.21,23.89  | - |
| chr5 | 3429419 | 3429716 | CSAR_peak_ | 50.81,20.07, | - |
| chr5 | 3429720 | 3429759 | CSAR_peak_ | 7.36,15.56   | - |
| chr5 | 3429775 | 3429859 | CSAR_peak_ | 33.75,21.56  | - |
| chr5 | 3429874 | 3429954 | CSAR_peak_ | 38.54,8.9    | - |
| chr5 | 3429967 | 3430220 | CSAR_peak_ | 24.38,9.55,2 | - |
| chr5 | 3430235 | 3430342 | CSAR_peak_ | 13.48,14.88  | - |
| chr5 | 3430356 | 3430403 | CSAR_peak_ | 7.27         | - |
| chr5 | 3448902 | 3448983 | CSAR_peak_ | 12.13,6.95   | - |
| chr5 | 3449179 | 3449207 | CSAR_peak_ | 10.83,8.39   | - |
| chr5 | 3449300 | 3449347 | CSAR_peak_ | 12.31,16.33  | - |
| chr5 | 3449695 | 3449786 | CSAR_peak_ | 12.13,13.44, | - |
| chr5 | 3450048 | 3450278 | CSAR_peak_ | 20.43,14.88, | - |
| chr5 | 3451039 | 3451101 | CSAR_peak_ | 14.88        | - |
| chr5 | 3451183 | 3451246 | CSAR_peak_ | 7.27         | - |
| chr5 | 3451321 | 3451354 | CSAR_peak_ | 14.85,10.94  | - |
| chr5 | 3451436 | 3451608 | CSAR_peak_ | 12.13,16.33  | - |
| chr5 | 3452358 | 3452425 | CSAR_peak_ | 8.39,8.28    | - |
| chr5 | 3452915 | 3452996 | CSAR_peak_ | 9.58         | - |
| chr5 | 3453072 | 3453111 | CSAR_peak_ | 14.88,9.77   | - |
| chr5 | 3453290 | 3453354 | CSAR_peak_ | 7.27         | - |
| chr5 | 3453686 | 3453701 | CSAR_peak_ | 7.58         | - |
| chr5 | 3453776 | 3453845 | CSAR_peak_ | 9.58         | - |
| chr5 | 3460522 | 3460528 | CSAR_peak_ | 6.21         | - |
| chr5 | 3460783 | 3460836 | CSAR_peak_ | 9.58,7.27    | - |
| chr5 | 3460938 | 3461017 | CSAR_peak_ | 8.14         | - |
| chr5 | 3461414 | 3461470 | CSAR_peak_ | 7.27         | - |
| chr5 | 3472595 | 3472692 | CSAR_peak_ | 8.65,6.44    | - |
| chr5 | 3472701 | 3472762 | CSAR_peak_ | 9.27         | - |
| chr5 | 3472852 | 3472878 | CSAR_peak_ | 6.21         | - |
| chr5 | 3473178 | 3473229 | CSAR_peak_ | 12.13        | - |
| chr5 | 3491146 | 3491219 | CSAR_peak_ | 6.03         | - |
| chr5 | 3492900 | 3492944 | CSAR_peak_ | 5.86         | - |
| chr5 | 3494682 | 3494753 | CSAR_peak_ | 16.05        | - |
| chr5 | 3514260 | 3514340 | CSAR_peak_ | 6.21         | - |
| chr5 | 3515406 | 3515462 | CSAR_peak_ | 7.27         | - |
| chr5 | 3515467 | 3515517 | CSAR_peak_ | 6.21         | - |

|      |         |         |            |                |   |
|------|---------|---------|------------|----------------|---|
| chr5 | 3515567 | 3515665 | CSAR_peak_ | 7.78,16.11     | - |
| chr5 | 3515730 | 3516075 | CSAR_peak_ | 23.49,35.74,   | - |
| chr5 | 3516151 | 3516218 | CSAR_peak_ | 12.31,32.46    | - |
| chr5 | 3516305 | 3516406 | CSAR_peak_ | 24.82,22.47    | - |
| chr5 | 3516413 | 3516614 | CSAR_peak_ | 22.58,23,6.1,  | - |
| chr5 | 3516648 | 3516926 | CSAR_peak_ | 54.36,15.03,   | - |
| chr5 | 3525942 | 3526038 | CSAR_peak_ | 9.77,7.58      | - |
| chr5 | 3526875 | 3526980 | CSAR_peak_ | 32.27,27.77    | - |
| chr5 | 3527058 | 3527126 | CSAR_peak_ | 14.88,9.58     | - |
| chr5 | 3547798 | 3547899 | CSAR_peak_ | 6.02,10.83     | - |
| chr5 | 3590081 | 3590133 | CSAR_peak_ | 7.27           | - |
| chr5 | 3591058 | 3591127 | CSAR_peak_ | 12.13          | - |
| chr5 | 3595434 | 3595487 | CSAR_peak_ | 7.27,8.39      | - |
| chr5 | 3685234 | 3685370 | CSAR_peak_ | 11.14,19.21    | - |
| chr5 | 3685418 | 3685471 | CSAR_peak_ | 11.03,7.27,9.  | - |
| chr5 | 3685529 | 3685615 | CSAR_peak_ | 6.21,8.14,8.6- | - |
| chr5 | 3685631 | 3685847 | CSAR_peak_ | 20.94,13.92    | - |
| chr5 | 3685927 | 3686057 | CSAR_peak_ | 11.45,17.82    | - |
| chr5 | 3686163 | 3686220 | CSAR_peak_ | 9.77           | - |
| chr5 | 3686422 | 3686480 | CSAR_peak_ | 6.21,7.27      | - |
| chr5 | 3686636 | 3686682 | CSAR_peak_ | 19.36          | - |
| chr5 | 3686872 | 3686922 | CSAR_peak_ | 10.83          | - |
| chr5 | 3687025 | 3687075 | CSAR_peak_ | 13.48          | - |
| chr5 | 3687146 | 3687210 | CSAR_peak_ | 25.91          | - |
| chr5 | 3687562 | 3687619 | CSAR_peak_ | 13.48          | - |
| chr5 | 3710178 | 3710246 | CSAR_peak_ | 19.36          | - |
| chr5 | 3710451 | 3710495 | CSAR_peak_ | 10.02          | - |
| chr5 | 3710580 | 3710621 | CSAR_peak_ | 6.03           | - |
| chr5 | 3711917 | 3711978 | CSAR_peak_ | 6.21,8.39      | - |
| chr5 | 3734166 | 3734225 | CSAR_peak_ | 12.13,9.77     | - |
| chr5 | 3735460 | 3735501 | CSAR_peak_ | 7.27           | - |
| chr5 | 3735804 | 3735892 | CSAR_peak_ | 9.58           | - |
| chr5 | 3736165 | 3736223 | CSAR_peak_ | 16.33          | - |
| chr5 | 3736492 | 3736546 | CSAR_peak_ | 9.58           | - |
| chr5 | 3737256 | 3737359 | CSAR_peak_ | 7.58,7.27      | - |
| chr5 | 3761563 | 3761613 | CSAR_peak_ | 7.27           | - |
| chr5 | 3762482 | 3762522 | CSAR_peak_ | 6.45           | - |
| chr5 | 3762609 | 3762655 | CSAR_peak_ | 6.21           | - |
| chr5 | 3762681 | 3762787 | CSAR_peak_ | 12.13,7.27     | - |
| chr5 | 3762947 | 3763136 | CSAR_peak_ | 7.58,13.92,1(- | - |
| chr5 | 3763274 | 3763327 | CSAR_peak_ | 13.51          | - |
| chr5 | 3763329 | 3763368 | CSAR_peak_ | 7.27           | - |

|      |         |         |            |               |   |
|------|---------|---------|------------|---------------|---|
| chr5 | 3763458 | 3763602 | CSAR_peak_ | 13.6,9.61     | - |
| chr5 | 3763655 | 3763722 | CSAR_peak_ | 12.13,6.21    | - |
| chr5 | 3763874 | 3764000 | CSAR_peak_ | 7.26,12.13,1  | - |
| chr5 | 3764305 | 3764415 | CSAR_peak_ | 14.88,17.82   | - |
| chr5 | 3764441 | 3764478 | CSAR_peak_ | 7.27          | - |
| chr5 | 3764495 | 3764607 | CSAR_peak_ | 17.82,12.31   | - |
| chr5 | 3764819 | 3764880 | CSAR_peak_ | 16.33         | - |
| chr5 | 3764919 | 3765217 | CSAR_peak_ | 26.69,20.94,  | - |
| chr5 | 3765338 | 3765410 | CSAR_peak_ | 15.2,12.74    | - |
| chr5 | 3765433 | 3765466 | CSAR_peak_ | 13.48         | - |
| chr5 | 3765695 | 3765735 | CSAR_peak_ | 14.88         | - |
| chr5 | 3765746 | 3765950 | CSAR_peak_ | 9.77,14.08,9. | - |
| chr5 | 3766248 | 3766314 | CSAR_peak_ | 13.44,12.5    | - |
| chr5 | 3766501 | 3766558 | CSAR_peak_ | 19.36,16.05,  | - |
| chr5 | 3766740 | 3766791 | CSAR_peak_ | 20.94,10.83   | - |
| chr5 | 3766923 | 3766995 | CSAR_peak_ | 16.11,12.31   | - |
| chr5 | 3767013 | 3767069 | CSAR_peak_ | 14.88         | - |
| chr5 | 3767352 | 3767465 | CSAR_peak_ | 6.02,8.19,9.2 | - |
| chr5 | 3767507 | 3767598 | CSAR_peak_ | 8.9,9.77      | - |
| chr5 | 3767757 | 3767870 | CSAR_peak_ | 10.66,19.18   | - |
| chr5 | 3767989 | 3768067 | CSAR_peak_ | 10.94         | - |
| chr5 | 3768137 | 3768255 | CSAR_peak_ | 16.34,7.47    | - |
| chr5 | 3768395 | 3768524 | CSAR_peak_ | 24.74,24.01   | - |
| chr5 | 3768731 | 3768806 | CSAR_peak_ | 19.36         | - |
| chr5 | 3768984 | 3769070 | CSAR_peak_ | 14,16.05      | - |
| chr5 | 3769091 | 3769104 | CSAR_peak_ | 7.27          | - |
| chr5 | 3769354 | 3769434 | CSAR_peak_ | 16.11,14.92   | - |
| chr5 | 3769444 | 3769563 | CSAR_peak_ | 16.87,10.47   | - |
| chr5 | 3769700 | 3769746 | CSAR_peak_ | 22.19,12.43   | - |
| chr5 | 3769781 | 3769816 | CSAR_peak_ | 7             | - |
| chr5 | 3770282 | 3770350 | CSAR_peak_ | 12.59,5.79,9. | - |
| chr5 | 3770352 | 3770384 | CSAR_peak_ | 16.33         | - |
| chr5 | 3770469 | 3770554 | CSAR_peak_ | 9.77,8.52     | - |
| chr5 | 3770600 | 3770617 | CSAR_peak_ | 7.27          | - |
| chr5 | 3770621 | 3770713 | CSAR_peak_ | 6.85          | - |
| chr5 | 3770826 | 3770939 | CSAR_peak_ | 8.39,9.58     | - |
| chr5 | 3771011 | 3771113 | CSAR_peak_ | 12.13,6.21    | - |
| chr5 | 3771136 | 3771174 | CSAR_peak_ | 7.27          | - |
| chr5 | 3771223 | 3771273 | CSAR_peak_ | 12.13         | - |
| chr5 | 3804878 | 3804932 | CSAR_peak_ | 8.52,13.48    | - |
| chr5 | 3805024 | 3805098 | CSAR_peak_ | 9.61          | - |
| chr5 | 3805193 | 3805281 | CSAR_peak_ | 21.94         | - |



|      |         |         |            |                  |   |
|------|---------|---------|------------|------------------|---|
| chr5 | 3805918 | 3805965 | CSAR_peak_ | 8.39             | - |
| chr5 | 3806536 | 3806583 | CSAR_peak_ | 14.88            | - |
| chr5 | 3806674 | 3806725 | CSAR_peak_ | 7.27             | - |
| chr5 | 3806988 | 3807029 | CSAR_peak_ | 7.27             | - |
| chr5 | 3807168 | 3807256 | CSAR_peak_ | 22.56,19.21      | - |
| chr5 | 3807439 | 3807505 | CSAR_peak_ | 13.51,16.33      | - |
| chr5 | 3807813 | 3807875 | CSAR_peak_ | 9.58             | - |
| chr5 | 3807919 | 3807970 | CSAR_peak_ | 10.83            | - |
| chr5 | 3813971 | 3814039 | CSAR_peak_ | 16.33,17.82      | - |
| chr5 | 3816633 | 3816700 | CSAR_peak_ | 7.58             | - |
| chr5 | 3816706 | 3816743 | CSAR_peak_ | 6.21             | - |
| chr5 | 3816920 | 3817058 | CSAR_peak_ | 8.28,11.96       | - |
| chr5 | 3817170 | 3817220 | CSAR_peak_ | 10.18            | - |
| chr5 | 3817325 | 3817369 | CSAR_peak_ | 17.82            | - |
| chr5 | 3817448 | 3817527 | CSAR_peak_ | 7.27,9.58        | - |
| chr5 | 3818071 | 3818125 | CSAR_peak_ | 14.88            | - |
| chr5 | 3818282 | 3818323 | CSAR_peak_ | 5.86             | - |
| chr5 | 3818548 | 3818654 | CSAR_peak_ | 10.82,6.02,14.88 | - |
| chr5 | 3818698 | 3818828 | CSAR_peak_ | 7.27,7.58        | - |
| chr5 | 3819888 | 3819925 | CSAR_peak_ | 8.39             | - |
| chr5 | 3820004 | 3820057 | CSAR_peak_ | 8.39,6.21        | - |
| chr5 | 3858811 | 3858871 | CSAR_peak_ | 13.51            | - |
| chr5 | 3859571 | 3859628 | CSAR_peak_ | 14.88            | - |
| chr5 | 3859681 | 3859705 | CSAR_peak_ | 6.21             | - |
| chr5 | 3863423 | 3863558 | CSAR_peak_ | 10.83,18.65      | - |
| chr5 | 3916372 | 3916394 | CSAR_peak_ | 7.27             | - |
| chr5 | 3917361 | 3917415 | CSAR_peak_ | 9.58             | - |
| chr5 | 3917704 | 3917760 | CSAR_peak_ | 7,6.21           | - |
| chr5 | 3917991 | 3918109 | CSAR_peak_ | 8.39,6.21        | - |
| chr5 | 3919852 | 3919902 | CSAR_peak_ | 8.39             | - |
| chr5 | 3921511 | 3921579 | CSAR_peak_ | 12.13,8.39       | - |
| chr5 | 3921744 | 3921808 | CSAR_peak_ | 7.27             | - |
| chr5 | 3922044 | 3922120 | CSAR_peak_ | 8.39,17.82       | - |
| chr5 | 3922284 | 3922333 | CSAR_peak_ | 10.83            | - |
| chr5 | 3922415 | 3922584 | CSAR_peak_ | 29.4,24.21       | - |
| chr5 | 3922765 | 3922860 | CSAR_peak_ | 14.76,17.82      | - |
| chr5 | 3923116 | 3923186 | CSAR_peak_ | 13.48,6.21       | - |
| chr5 | 3923192 | 3923266 | CSAR_peak_ | 20.43,12.13      | - |
| chr5 | 3923352 | 3923492 | CSAR_peak_ | 27.64,23.89      | - |
| chr5 | 3923625 | 3923678 | CSAR_peak_ | 11.14,8.39       | - |
| chr5 | 3923808 | 3923985 | CSAR_peak_ | 38.54,33.47      | - |
| chr5 | 3924741 | 3924778 | CSAR_peak_ | 8.39             | - |

|      |         |         |            |                |   |
|------|---------|---------|------------|----------------|---|
| chr5 | 3925403 | 3925420 | CSAR_peak_ | 9.58           | - |
| chr5 | 3925533 | 3925572 | CSAR_peak_ | 25.91          | - |
| chr5 | 3925577 | 3925617 | CSAR_peak_ | 6.44           | - |
| chr5 | 3928125 | 3928161 | CSAR_peak_ | 6.21           | - |
| chr5 | 3928323 | 3928346 | CSAR_peak_ | 12.17          | - |
| chr5 | 3928368 | 3928401 | CSAR_peak_ | 7.58           | - |
| chr5 | 3929106 | 3929174 | CSAR_peak_ | 8.65,7.58      | - |
| chr5 | 3929249 | 3929300 | CSAR_peak_ | 8.39,9.58      | - |
| chr5 | 3942500 | 3942571 | CSAR_peak_ | 8.14,12.13     | - |
| chr5 | 3943154 | 3943200 | CSAR_peak_ | 7.27           | - |
| chr5 | 3943449 | 3943486 | CSAR_peak_ | 8.39           | - |
| chr5 | 3943835 | 3943931 | CSAR_peak_ | 6.21           | - |
| chr5 | 3944321 | 3944372 | CSAR_peak_ | 6.87           | - |
| chr5 | 3953831 | 3953933 | CSAR_peak_ | 31.2,6.21      | - |
| chr5 | 3953950 | 3953986 | CSAR_peak_ | 7.27,6.21      | - |
| chr5 | 3954113 | 3954196 | CSAR_peak_ | 20.5,44.01     | - |
| chr5 | 3954375 | 3954514 | CSAR_peak_ | 17.82,18.6     | - |
| chr5 | 3954550 | 3954678 | CSAR_peak_ | 8.09,6.81      | - |
| chr5 | 3954907 | 3955020 | CSAR_peak_ | 11.66,23.49    | - |
| chr5 | 3955097 | 3955144 | CSAR_peak_ | 7.27,21.81     | - |
| chr5 | 3955245 | 3955353 | CSAR_peak_ | 27.86,11.38,;- | - |
| chr5 | 3955538 | 3955577 | CSAR_peak_ | 7.27           | - |
| chr5 | 3960215 | 3960292 | CSAR_peak_ | 10.83,7.27     | - |
| chr5 | 3961311 | 3961390 | CSAR_peak_ | 8.65           | - |
| chr5 | 3961415 | 3961485 | CSAR_peak_ | 6.21           | - |
| chr5 | 3962616 | 3962679 | CSAR_peak_ | 7.27           | - |
| chr5 | 3974644 | 3974745 | CSAR_peak_ | 7.27,9.58      | - |
| chr5 | 3974862 | 3974940 | CSAR_peak_ | 10.83,8.39     | - |
| chr5 | 3975741 | 3975806 | CSAR_peak_ | 8.39           | - |
| chr5 | 3976078 | 3976115 | CSAR_peak_ | 6.21           | - |
| chr5 | 3980353 | 3980424 | CSAR_peak_ | 7.27           | - |
| chr5 | 3993040 | 3993079 | CSAR_peak_ | 6.21           | - |
| chr5 | 4003160 | 4003231 | CSAR_peak_ | 13.48          | - |
| chr5 | 4003330 | 4003462 | CSAR_peak_ | 12.13,13.44    | - |
| chr5 | 4004396 | 4004491 | CSAR_peak_ | 8.95,8.53      | - |
| chr5 | 4005095 | 4005220 | CSAR_peak_ | 12.59,11.38,;- | - |
| chr5 | 4005272 | 4005290 | CSAR_peak_ | 7.27           | - |
| chr5 | 4005528 | 4005551 | CSAR_peak_ | 6.45           | - |
| chr5 | 4005789 | 4005857 | CSAR_peak_ | 14.88,7.58     | - |
| chr5 | 4005972 | 4006054 | CSAR_peak_ | 11.96,18.61    | - |
| chr5 | 4006190 | 4006231 | CSAR_peak_ | 12.13          | - |
| chr5 | 4006271 | 4006346 | CSAR_peak_ | 9.77,12.13     | - |

|      |         |         |            |               |   |
|------|---------|---------|------------|---------------|---|
| chr5 | 4006918 | 4006952 | CSAR_peak_ | 8.39          | - |
| chr5 | 4007044 | 4007133 | CSAR_peak_ | 8.12,7.7,15.2 | - |
| chr5 | 4007429 | 4007455 | CSAR_peak_ | 8.13          | - |
| chr5 | 4007537 | 4007588 | CSAR_peak_ | 6.22,14.76    | - |
| chr5 | 4007659 | 4007761 | CSAR_peak_ | 7.92,7.27,24. | - |
| chr5 | 4007876 | 4007951 | CSAR_peak_ | 16.08,10.83   | - |
| chr5 | 4008153 | 4008201 | CSAR_peak_ | 6.44          | - |
| chr5 | 4008228 | 4008270 | CSAR_peak_ | 7.58          | - |
| chr5 | 4011112 | 4011195 | CSAR_peak_ | 5.86,22.56,6. | - |
| chr5 | 4011263 | 4011313 | CSAR_peak_ | 14.88         | - |
| chr5 | 4011610 | 4011654 | CSAR_peak_ | 9.58          | - |
| chr5 | 4022828 | 4022892 | CSAR_peak_ | 12.13         | - |
| chr5 | 4024916 | 4024963 | CSAR_peak_ | 8.28,10.83    | - |
| chr5 | 4025026 | 4025062 | CSAR_peak_ | 9.58          | - |
| chr5 | 4025331 | 4025369 | CSAR_peak_ | 7             | - |
| chr5 | 4025417 | 4025436 | CSAR_peak_ | 6.57          | - |
| chr5 | 4025575 | 4025612 | CSAR_peak_ | 5.86,6.21     | - |
| chr5 | 4029619 | 4029679 | CSAR_peak_ | 8.39,9.58     | - |
| chr5 | 4030212 | 4030266 | CSAR_peak_ | 7.27          | - |
| chr5 | 4030453 | 4030499 | CSAR_peak_ | 6.21          | - |
| chr5 | 4033146 | 4033203 | CSAR_peak_ | 12.13,6.21    | - |
| chr5 | 4033365 | 4033443 | CSAR_peak_ | 9.58,9.58     | - |
| chr5 | 4036466 | 4036518 | CSAR_peak_ | 6.44          | - |
| chr5 | 4045373 | 4045466 | CSAR_peak_ | 14.88,6.21    | - |
| chr5 | 4047936 | 4047984 | CSAR_peak_ | 7.29          | - |
| chr5 | 4048086 | 4048227 | CSAR_peak_ | 11.28,16.05,  | - |
| chr5 | 4048373 | 4048450 | CSAR_peak_ | 6.21          | - |
| chr5 | 4048719 | 4048753 | CSAR_peak_ | 13.48,14.88   | - |
| chr5 | 4048824 | 4048876 | CSAR_peak_ | 9.58,9.58     | - |
| chr5 | 4049144 | 4049204 | CSAR_peak_ | 7.27,6.21     | - |
| chr5 | 4049387 | 4049429 | CSAR_peak_ | 7.27,9.58     | - |
| chr5 | 4049520 | 4049588 | CSAR_peak_ | 14.88,6.21    | - |
| chr5 | 4049805 | 4049888 | CSAR_peak_ | 12.13,8.39    | - |
| chr5 | 4049959 | 4050017 | CSAR_peak_ | 7.27          | - |
| chr5 | 4050926 | 4051015 | CSAR_peak_ | 14.88,13.48   | - |
| chr5 | 4051147 | 4051212 | CSAR_peak_ | 6.21          | - |
| chr5 | 4051241 | 4051323 | CSAR_peak_ | 8.14          | - |
| chr5 | 4051532 | 4051586 | CSAR_peak_ | 15.9,7.58     | - |
| chr5 | 4052238 | 4052332 | CSAR_peak_ | 12.13,12.13   | - |
| chr5 | 4052685 | 4052692 | CSAR_peak_ | 7.27          | - |
| chr5 | 4052950 | 4052964 | CSAR_peak_ | 7.27          | - |
| chr5 | 4053278 | 4053320 | CSAR_peak_ | 8.39          | - |

|      |         |         |            |                |   |
|------|---------|---------|------------|----------------|---|
| chr5 | 4060995 | 4061058 | CSAR_peak_ | 7.27           | - |
| chr5 | 4109995 | 4110066 | CSAR_peak_ | 6.21           | - |
| chr5 | 4112792 | 4112830 | CSAR_peak_ | 7.27           | - |
| chr5 | 4113546 | 4113601 | CSAR_peak_ | 12.13          | - |
| chr5 | 4113699 | 4113743 | CSAR_peak_ | 7.27           | - |
| chr5 | 4114769 | 4114830 | CSAR_peak_ | 17.82,10.83    | - |
| chr5 | 4115454 | 4115499 | CSAR_peak_ | 12.13          | - |
| chr5 | 4115757 | 4115824 | CSAR_peak_ | 8.39           | - |
| chr5 | 4116143 | 4116180 | CSAR_peak_ | 7.58           | - |
| chr5 | 4116506 | 4116545 | CSAR_peak_ | 8.39           | - |
| chr5 | 4118466 | 4118514 | CSAR_peak_ | 7.27,7.27      | - |
| chr5 | 4119432 | 4119523 | CSAR_peak_ | 24.21,11.07,   | - |
| chr5 | 4120366 | 4120426 | CSAR_peak_ | 6.03,9.58      | - |
| chr5 | 4129314 | 4129384 | CSAR_peak_ | 16.33          | - |
| chr5 | 4129862 | 4129901 | CSAR_peak_ | 7.92           | - |
| chr5 | 4130031 | 4130087 | CSAR_peak_ | 8.09           | - |
| chr5 | 4130774 | 4130828 | CSAR_peak_ | 14.88          | - |
| chr5 | 4131012 | 4131023 | CSAR_peak_ | 6.21           | - |
| chr5 | 4131520 | 4131573 | CSAR_peak_ | 16.33,8.95     | - |
| chr5 | 4137817 | 4137881 | CSAR_peak_ | 7.58,8.39      | - |
| chr5 | 4153894 | 4153950 | CSAR_peak_ | 5.86           | - |
| chr5 | 4162851 | 4162895 | CSAR_peak_ | 7.27,6.44      | - |
| chr5 | 4163134 | 4163172 | CSAR_peak_ | 7.27           | - |
| chr5 | 4163384 | 4163434 | CSAR_peak_ | 7.92           | - |
| chr5 | 4163993 | 4164058 | CSAR_peak_ | 9.58           | - |
| chr5 | 4201547 | 4201625 | CSAR_peak_ | 46.89,19.36    | - |
| chr5 | 4202697 | 4202748 | CSAR_peak_ | 9.58           | - |
| chr5 | 4203469 | 4203571 | CSAR_peak_ | 7.27           | - |
| chr5 | 4203702 | 4203739 | CSAR_peak_ | 10.83          | - |
| chr5 | 4203843 | 4203914 | CSAR_peak_ | 14.88          | - |
| chr5 | 4204448 | 4204667 | CSAR_peak_ | 28.21,12.13,   | - |
| chr5 | 4204687 | 4204773 | CSAR_peak_ | 12.13,16.33    | - |
| chr5 | 4204801 | 4204962 | CSAR_peak_ | 7.27,7.27,9.5- | - |
| chr5 | 4205033 | 4205081 | CSAR_peak_ | 12.13          | - |
| chr5 | 4205168 | 4205274 | CSAR_peak_ | 13.48,16.11,   | - |
| chr5 | 4205280 | 4205295 | CSAR_peak_ | 7.58           | - |
| chr5 | 4206200 | 4206255 | CSAR_peak_ | 14.88          | - |
| chr5 | 4222000 | 4222087 | CSAR_peak_ | 23.32,7.97,2(- | - |
| chr5 | 4225660 | 4225748 | CSAR_peak_ | 8.39           | - |
| chr5 | 4226404 | 4226477 | CSAR_peak_ | 7.27,7.27      | - |
| chr5 | 4226609 | 4226659 | CSAR_peak_ | 7.27           | - |
| chr5 | 4226942 | 4226990 | CSAR_peak_ | 7.58,7,8.14    | - |

|      |         |         |            |                |   |
|------|---------|---------|------------|----------------|---|
| chr5 | 4227135 | 4227196 | CSAR_peak_ | 6.57           | - |
| chr5 | 4257485 | 4257551 | CSAR_peak_ | 17.82          | - |
| chr5 | 4258403 | 4258470 | CSAR_peak_ | 7.27           | - |
| chr5 | 4258735 | 4258789 | CSAR_peak_ | 7.27           | - |
| chr5 | 4259879 | 4259924 | CSAR_peak_ | 10.95          | - |
| chr5 | 4260391 | 4260454 | CSAR_peak_ | 9.58,7.58      | - |
| chr5 | 4260665 | 4260736 | CSAR_peak_ | 20.94          | - |
| chr5 | 4261018 | 4261076 | CSAR_peak_ | 14.76          | - |
| chr5 | 4261237 | 4261300 | CSAR_peak_ | 14.88          | - |
| chr5 | 4262188 | 4262214 | CSAR_peak_ | 8.39           | - |
| chr5 | 4299886 | 4299926 | CSAR_peak_ | 6.21           | - |
| chr5 | 4300011 | 4300104 | CSAR_peak_ | 8.28,17.37     | - |
| chr5 | 4300792 | 4300842 | CSAR_peak_ | 13.51          | - |
| chr5 | 4303359 | 4303404 | CSAR_peak_ | 12.17          | - |
| chr5 | 4310784 | 4310860 | CSAR_peak_ | 6.21,7.27      | - |
| chr5 | 4329588 | 4329638 | CSAR_peak_ | 6.21           | - |
| chr5 | 4329949 | 4329983 | CSAR_peak_ | 6.21           | - |
| chr5 | 4331262 | 4331328 | CSAR_peak_ | 9.58           | - |
| chr5 | 4336876 | 4336953 | CSAR_peak_ | 19.36,12.13    | - |
| chr5 | 4355472 | 4355518 | CSAR_peak_ | 7.27           | - |
| chr5 | 4358555 | 4358644 | CSAR_peak_ | 20.94,7.27     | - |
| chr5 | 4362061 | 4362105 | CSAR_peak_ | 6.03           | - |
| chr5 | 4362274 | 4362365 | CSAR_peak_ | 12.31          | - |
| chr5 | 4362516 | 4362558 | CSAR_peak_ | 9.58,7.27      | - |
| chr5 | 4362635 | 4362716 | CSAR_peak_ | 8.52,10.95     | - |
| chr5 | 4363581 | 4363607 | CSAR_peak_ | 8.39           | - |
| chr5 | 4363980 | 4364057 | CSAR_peak_ | 8.39,7.27      | - |
| chr5 | 4364457 | 4364497 | CSAR_peak_ | 7.27           | - |
| chr5 | 4364670 | 4364706 | CSAR_peak_ | 9.58           | - |
| chr5 | 4373414 | 4373526 | CSAR_peak_ | 16.11,6.21,7.- | - |
| chr5 | 4373565 | 4373623 | CSAR_peak_ | 8.39,8.65,16.- | - |
| chr5 | 4373751 | 4373826 | CSAR_peak_ | 21.22,8.13     | - |
| chr5 | 4374007 | 4374090 | CSAR_peak_ | 13.48,29.4     | - |
| chr5 | 4374245 | 4374308 | CSAR_peak_ | 12.31          | - |
| chr5 | 4374562 | 4374651 | CSAR_peak_ | 6.21,7.27      | - |
| chr5 | 4374721 | 4374881 | CSAR_peak_ | 33.47,15.68    | - |
| chr5 | 4374883 | 4374926 | CSAR_peak_ | 7.27           | - |
| chr5 | 4374972 | 4375090 | CSAR_peak_ | 27.61,20.94    | - |
| chr5 | 4375353 | 4375397 | CSAR_peak_ | 7.27           | - |
| chr5 | 4375485 | 4375568 | CSAR_peak_ | 9.58           | - |
| chr5 | 4375588 | 4375652 | CSAR_peak_ | 6.85           | - |
| chr5 | 4375732 | 4375805 | CSAR_peak_ | 9.58,12.13     | - |

|      |         |         |            |               |   |
|------|---------|---------|------------|---------------|---|
| chr5 | 4375872 | 4375949 | CSAR_peak_ | 9.58,6.21     | - |
| chr5 | 4375963 | 4376006 | CSAR_peak_ | 8.39          | - |
| chr5 | 4376107 | 4376142 | CSAR_peak_ | 12.13,6.21    | - |
| chr5 | 4376372 | 4376443 | CSAR_peak_ | 9.77,7.58     | - |
| chr5 | 4376579 | 4376586 | CSAR_peak_ | 7.27          | - |
| chr5 | 4376676 | 4376982 | CSAR_peak_ | 21.22,5.86,1  | - |
| chr5 | 4377036 | 4377141 | CSAR_peak_ | 7.27,9.58     | - |
| chr5 | 4377416 | 4377564 | CSAR_peak_ | 28.62,16.33,! | - |
| chr5 | 4377649 | 4377777 | CSAR_peak_ | 12.13,12.13   | - |
| chr5 | 4377821 | 4377888 | CSAR_peak_ | 12.31         | - |
| chr5 | 4378060 | 4378144 | CSAR_peak_ | 12.13,12.13   | - |
| chr5 | 4378375 | 4378453 | CSAR_peak_ | 16.33,7.27    | - |
| chr5 | 4378491 | 4378551 | CSAR_peak_ | 10.83         | - |
| chr5 | 4378630 | 4378680 | CSAR_peak_ | 14.88,13.29   | - |
| chr5 | 4378788 | 4378868 | CSAR_peak_ | 10.83         | - |
| chr5 | 4387548 | 4387666 | CSAR_peak_ | 16.11         | - |
| chr5 | 4387787 | 4387816 | CSAR_peak_ | 6.44          | - |
| chr5 | 4387841 | 4388004 | CSAR_peak_ | 6.72,12.35,5. | - |
| chr5 | 4388386 | 4388483 | CSAR_peak_ | 19.98,8.65    | - |
| chr5 | 4388623 | 4388746 | CSAR_peak_ | 18.65,38.71   | - |
| chr5 | 4388957 | 4389099 | CSAR_peak_ | 16.33,17.82   | - |
| chr5 | 4390386 | 4390401 | CSAR_peak_ | 7.27          | - |
| chr5 | 4390500 | 4390544 | CSAR_peak_ | 12.13         | - |
| chr5 | 4391100 | 4391167 | CSAR_peak_ | 21.94         | - |
| chr5 | 4413102 | 4413204 | CSAR_peak_ | 9.77          | - |
| chr5 | 4414276 | 4414351 | CSAR_peak_ | 16.33,5.62,1  | - |
| chr5 | 4414745 | 4414820 | CSAR_peak_ | 13.51         | - |
| chr5 | 4418973 | 4419019 | CSAR_peak_ | 6.21          | - |
| chr5 | 4419266 | 4419340 | CSAR_peak_ | 19.36,17.82   | - |
| chr5 | 4419563 | 4419636 | CSAR_peak_ | 17.37,6.57    | - |
| chr5 | 4420321 | 4420382 | CSAR_peak_ | 8.39          | - |
| chr5 | 4420386 | 4420459 | CSAR_peak_ | 10.31         | - |
| chr5 | 4420709 | 4420819 | CSAR_peak_ | 21.94,25.91   | - |
| chr5 | 4421004 | 4421081 | CSAR_peak_ | 9.58          | - |
| chr5 | 4421094 | 4421138 | CSAR_peak_ | 13.48         | - |
| chr5 | 4421193 | 4421244 | CSAR_peak_ | 6.21          | - |
| chr5 | 4421622 | 4421704 | CSAR_peak_ | 11.03,9.58    | - |
| chr5 | 4421729 | 4421789 | CSAR_peak_ | 12.17,8.39    | - |
| chr5 | 4422021 | 4422099 | CSAR_peak_ | 10.02,19.36   | - |
| chr5 | 4422101 | 4422190 | CSAR_peak_ | 8.39          | - |
| chr5 | 4422203 | 4422348 | CSAR_peak_ | 19.36,17.37,! | - |
| chr5 | 4422405 | 4422476 | CSAR_peak_ | 6.95,14.76    | - |

|      |         |         |            |                 |
|------|---------|---------|------------|-----------------|
| chr5 | 4422805 | 4422961 | CSAR_peak_ | 10.66,19.36,-   |
| chr5 | 4423901 | 4424083 | CSAR_peak_ | 6.21,14.88,10.- |
| chr5 | 4424205 | 4424317 | CSAR_peak_ | 6.45,40.66,14.- |
| chr5 | 4424384 | 4424452 | CSAR_peak_ | 57.21,26.69 -   |
| chr5 | 4424464 | 4424546 | CSAR_peak_ | 13.48,5.9 -     |
| chr5 | 4424607 | 4424691 | CSAR_peak_ | 18.65,20.94 -   |
| chr5 | 4424776 | 4424893 | CSAR_peak_ | 16.25,31.72 -   |
| chr5 | 4424972 | 4425069 | CSAR_peak_ | 17.37,18.95 -   |
| chr5 | 4425174 | 4425222 | CSAR_peak_ | 15.2,16.77 -    |
| chr5 | 4425302 | 4425366 | CSAR_peak_ | 13.84,27.61 -   |
| chr5 | 4425498 | 4425512 | CSAR_peak_ | 10.31,29.4 -    |
| chr5 | 4425577 | 4425751 | CSAR_peak_ | 9.58,6.21,19.-  |
| chr5 | 4425823 | 4425885 | CSAR_peak_ | 9.58,14.88 -    |
| chr5 | 4426143 | 4426210 | CSAR_peak_ | 9.58,8.39,7.2-  |
| chr5 | 4426828 | 4426893 | CSAR_peak_ | 8.28 -          |
| chr5 | 4429345 | 4429427 | CSAR_peak_ | 6.02 -          |
| chr5 | 4429495 | 4429558 | CSAR_peak_ | 7.27,6.21 -     |
| chr5 | 4447766 | 4447806 | CSAR_peak_ | 7.27 -          |
| chr5 | 4451969 | 4452020 | CSAR_peak_ | 7.27 -          |
| chr5 | 4452032 | 4452199 | CSAR_peak_ | 9.61,6.57,10.-  |
| chr5 | 4452218 | 4452363 | CSAR_peak_ | 17.51,10.83,-   |
| chr5 | 4452377 | 4452449 | CSAR_peak_ | 15.21,6.21 -    |
| chr5 | 4452708 | 4452760 | CSAR_peak_ | 9.77,7.58 -     |
| chr5 | 4453166 | 4453225 | CSAR_peak_ | 9.58 -          |
| chr5 | 4453291 | 4453400 | CSAR_peak_ | 7.92,6.21 -     |
| chr5 | 4453559 | 4453651 | CSAR_peak_ | 9.58 -          |
| chr5 | 4453673 | 4453718 | CSAR_peak_ | 8.65 -          |
| chr5 | 4453969 | 4454020 | CSAR_peak_ | 12.13,10.83 -   |
| chr5 | 4454058 | 4454166 | CSAR_peak_ | 12.13,14.76 -   |
| chr5 | 4454329 | 4454361 | CSAR_peak_ | 8.39 -          |
| chr5 | 4454512 | 4454554 | CSAR_peak_ | 13.48 -         |
| chr5 | 4496017 | 4496062 | CSAR_peak_ | 8.39 -          |
| chr5 | 4496363 | 4496416 | CSAR_peak_ | 6.21 -          |
| chr5 | 4496602 | 4496654 | CSAR_peak_ | 7.27 -          |
| chr5 | 4496714 | 4496810 | CSAR_peak_ | 16.33,9.77 -    |
| chr5 | 4497254 | 4497356 | CSAR_peak_ | 17.82,12.13 -   |
| chr5 | 4497867 | 4497960 | CSAR_peak_ | 11.96,16.05 -   |
| chr5 | 4498081 | 4498133 | CSAR_peak_ | 8.12 -          |
| chr5 | 4498148 | 4498225 | CSAR_peak_ | 10.95 -         |
| chr5 | 4498562 | 4498673 | CSAR_peak_ | 12.13,12.13 -   |
| chr5 | 4498769 | 4498864 | CSAR_peak_ | 7.27,14.88 -    |
| chr5 | 4499171 | 4499209 | CSAR_peak_ | 9.48 -          |

|      |         |         |            |               |   |
|------|---------|---------|------------|---------------|---|
| chr5 | 4499229 | 4499255 | CSAR_peak_ | 7.34          | - |
| chr5 | 4499348 | 4499449 | CSAR_peak_ | 9.41,5.86,10. | - |
| chr5 | 4499676 | 4499756 | CSAR_peak_ | 7.68          | - |
| chr5 | 4499889 | 4499939 | CSAR_peak_ | 6.85,7.27     | - |
| chr5 | 4500016 | 4500070 | CSAR_peak_ | 7.27          | - |
| chr5 | 4500170 | 4500221 | CSAR_peak_ | 12.13         | - |
| chr5 | 4530976 | 4531017 | CSAR_peak_ | 12.13         | - |
| chr5 | 4531456 | 4531503 | CSAR_peak_ | 12.13         | - |
| chr5 | 4550023 | 4550088 | CSAR_peak_ | 8.39          | - |
| chr5 | 4578845 | 4578937 | CSAR_peak_ | 9.77          | - |
| chr5 | 4579299 | 4579363 | CSAR_peak_ | 12.13         | - |
| chr5 | 4583275 | 4583329 | CSAR_peak_ | 9.58          | - |
| chr5 | 4583957 | 4584025 | CSAR_peak_ | 8.39          | - |
| chr5 | 4585164 | 4585255 | CSAR_peak_ | 6.21,8.39     | - |
| chr5 | 4585604 | 4585632 | CSAR_peak_ | 9.58          | - |
| chr5 | 4586718 | 4586775 | CSAR_peak_ | 9.58,10.82    | - |
| chr5 | 4586903 | 4587027 | CSAR_peak_ | 8.14          | - |
| chr5 | 4617909 | 4617959 | CSAR_peak_ | 8.39          | - |
| chr5 | 4632356 | 4632403 | CSAR_peak_ | 6.21          | - |
| chr5 | 4632449 | 4632520 | CSAR_peak_ | 6.81          | - |
| chr5 | 4632981 | 4633015 | CSAR_peak_ | 7.27          | - |
| chr5 | 4649350 | 4649430 | CSAR_peak_ | 7.58          | - |
| chr5 | 4681179 | 4681251 | CSAR_peak_ | 6.81          | - |
| chr5 | 4688749 | 4688849 | CSAR_peak_ | 19.36,10.95   | - |
| chr5 | 4690029 | 4690079 | CSAR_peak_ | 8.14          | - |
| chr5 | 4690310 | 4690435 | CSAR_peak_ | 53.81,107.74  | - |
| chr5 | 4691546 | 4691593 | CSAR_peak_ | 17.82         | - |
| chr5 | 4691838 | 4691882 | CSAR_peak_ | 6.21          | - |
| chr5 | 4691995 | 4692055 | CSAR_peak_ | 17.82,8.39    | - |
| chr5 | 4692234 | 4692273 | CSAR_peak_ | 25.91,10.95   | - |
| chr5 | 4693742 | 4693841 | CSAR_peak_ | 9.58,8.39,6.2 | - |
| chr5 | 4703952 | 4704030 | CSAR_peak_ | 9.58          | - |
| chr5 | 4704218 | 4704286 | CSAR_peak_ | 9.58          | - |
| chr5 | 4719930 | 4719969 | CSAR_peak_ | 9.58          | - |
| chr5 | 4720685 | 4720744 | CSAR_peak_ | 7.27          | - |
| chr5 | 4721218 | 4721272 | CSAR_peak_ | 7.58          | - |
| chr5 | 4721662 | 4721712 | CSAR_peak_ | 6.21          | - |
| chr5 | 4728304 | 4728348 | CSAR_peak_ | 7.27          | - |
| chr5 | 4732904 | 4732954 | CSAR_peak_ | 6.21          | - |
| chr5 | 4748208 | 4748235 | CSAR_peak_ | 6.21          | - |
| chr5 | 4748430 | 4748453 | CSAR_peak_ | 7.58          | - |
| chr5 | 4748623 | 4748680 | CSAR_peak_ | 12.13         | - |



|      |         |         |            |                  |   |
|------|---------|---------|------------|------------------|---|
| chr5 | 4748801 | 4748857 | CSAR_peak_ | 29.17,10.1       | - |
| chr5 | 4748962 | 4749055 | CSAR_peak_ | 18.73,21.37,9.58 | - |
| chr5 | 4749069 | 4749107 | CSAR_peak_ | 7.27             | - |
| chr5 | 4749360 | 4749382 | CSAR_peak_ | 6.21             | - |
| chr5 | 4749396 | 4749447 | CSAR_peak_ | 16.08            | - |
| chr5 | 4749516 | 4749554 | CSAR_peak_ | 10.62            | - |
| chr5 | 4749826 | 4749976 | CSAR_peak_ | 6.45,10.33,9.58  | - |
| chr5 | 4750479 | 4750548 | CSAR_peak_ | 8.39,21.24       | - |
| chr5 | 4751022 | 4751030 | CSAR_peak_ | 7.27             | - |
| chr5 | 4751112 | 4751167 | CSAR_peak_ | 7.26,24.52       | - |
| chr5 | 4751314 | 4751357 | CSAR_peak_ | 7.27             | - |
| chr5 | 4751603 | 4751659 | CSAR_peak_ | 6.21             | - |
| chr5 | 4752540 | 4752604 | CSAR_peak_ | 17.82,6.95       | - |
| chr5 | 4753529 | 4753589 | CSAR_peak_ | 8.39             | - |
| chr5 | 4786507 | 4786566 | CSAR_peak_ | 7.58             | - |
| chr5 | 4833049 | 4833122 | CSAR_peak_ | 7.27             | - |
| chr5 | 4859499 | 4859543 | CSAR_peak_ | 7.58             | - |
| chr5 | 4859690 | 4859740 | CSAR_peak_ | 8.39             | - |
| chr5 | 4859812 | 4859852 | CSAR_peak_ | 7.27,7.27        | - |
| chr5 | 4860591 | 4860653 | CSAR_peak_ | 6.57,11.14       | - |
| chr5 | 4860955 | 4861077 | CSAR_peak_ | 8.14,8.2,6.57    | - |
| chr5 | 4861113 | 4861187 | CSAR_peak_ | 8.39,10.31       | - |
| chr5 | 4861626 | 4861658 | CSAR_peak_ | 7.92             | - |
| chr5 | 4861923 | 4861969 | CSAR_peak_ | 8.39             | - |
| chr5 | 4861998 | 4862068 | CSAR_peak_ | 6.57,7.27        | - |
| chr5 | 4862522 | 4862689 | CSAR_peak_ | 12.17,7.92,11.14 | - |
| chr5 | 4862822 | 4862924 | CSAR_peak_ | 6.81,9.58,17.82  | - |
| chr5 | 4863041 | 4863122 | CSAR_peak_ | 8.39,14.88       | - |
| chr5 | 4863583 | 4863602 | CSAR_peak_ | 7.58             | - |
| chr5 | 4863677 | 4863704 | CSAR_peak_ | 6.21             | - |
| chr5 | 4863820 | 4863868 | CSAR_peak_ | 6.21             | - |
| chr5 | 4864230 | 4864281 | CSAR_peak_ | 9.48             | - |
| chr5 | 4864757 | 4864820 | CSAR_peak_ | 12.13            | - |
| chr5 | 4865078 | 4865138 | CSAR_peak_ | 9.58,9.58        | - |
| chr5 | 4865208 | 4865326 | CSAR_peak_ | 7.27,9.58        | - |
| chr5 | 4865522 | 4865577 | CSAR_peak_ | 17.82,17.82      | - |
| chr5 | 4865717 | 4865741 | CSAR_peak_ | 10.83,12.31      | - |
| chr5 | 4891341 | 4891401 | CSAR_peak_ | 6.21,12.13       | - |
| chr5 | 4933265 | 4933404 | CSAR_peak_ | 9.58             | - |
| chr5 | 4933430 | 4933500 | CSAR_peak_ | 10.82            | - |
| chr5 | 4935933 | 4936018 | CSAR_peak_ | 10.96,11.38      | - |
| chr5 | 4936327 | 4936377 | CSAR_peak_ | 7.27             | - |

|      |         |         |            |                |   |
|------|---------|---------|------------|----------------|---|
| chr5 | 4950713 | 4950763 | CSAR_peak_ | 8.39           | - |
| chr5 | 4951678 | 4951735 | CSAR_peak_ | 6.81           | - |
| chr5 | 4952407 | 4952506 | CSAR_peak_ | 6.21,33.03     | - |
| chr5 | 4953850 | 4953905 | CSAR_peak_ | 7.27,7.27      | - |
| chr5 | 4953907 | 4953960 | CSAR_peak_ | 9.58           | - |
| chr5 | 4984196 | 4984244 | CSAR_peak_ | 7.27,6.21      | - |
| chr5 | 4984584 | 4984638 | CSAR_peak_ | 13.48          | - |
| chr5 | 4984859 | 4984934 | CSAR_peak_ | 7.27           | - |
| chr5 | 4985168 | 4985231 | CSAR_peak_ | 12.13          | - |
| chr5 | 4985401 | 4985531 | CSAR_peak_ | 22.52,16.05    | - |
| chr5 | 4986025 | 4986164 | CSAR_peak_ | 23.2,22.85     | - |
| chr5 | 4993307 | 4993381 | CSAR_peak_ | 8.39,7.27      | - |
| chr5 | 4997327 | 4997379 | CSAR_peak_ | 8.39           | - |
| chr5 | 4997816 | 4997975 | CSAR_peak_ | 37.51,26.43    | - |
| chr5 | 4998038 | 4998128 | CSAR_peak_ | 13.48,16.33    | - |
| chr5 | 4998233 | 4998331 | CSAR_peak_ | 10.02,9.58     | - |
| chr5 | 4998499 | 4998613 | CSAR_peak_ | 10.83,23.49    | - |
| chr5 | 4998657 | 4998737 | CSAR_peak_ | 25.12,24.17    | - |
| chr5 | 4998886 | 4998992 | CSAR_peak_ | 10.02,20.35,   | - |
| chr5 | 4999031 | 4999191 | CSAR_peak_ | 12.61,10.31    | - |
| chr5 | 4999239 | 4999261 | CSAR_peak_ | 7.27           | - |
| chr5 | 4999291 | 4999395 | CSAR_peak_ | 18.65          | - |
| chr5 | 4999540 | 4999665 | CSAR_peak_ | 24.21,6.95     | - |
| chr5 | 4999805 | 4999878 | CSAR_peak_ | 6.31,10.94     | - |
| chr5 | 4999982 | 5000169 | CSAR_peak_ | 16.33,18.85    | - |
| chr5 | 5000210 | 5000275 | CSAR_peak_ | 9.58,6.03      | - |
| chr5 | 5000303 | 5000461 | CSAR_peak_ | 7.58,31.72,2,  | - |
| chr5 | 5000718 | 5000736 | CSAR_peak_ | 7.27           | - |
| chr5 | 5000862 | 5000971 | CSAR_peak_ | 12.13          | - |
| chr5 | 5001079 | 5001225 | CSAR_peak_ | 22.56,17.82,   | - |
| chr5 | 5001381 | 5001424 | CSAR_peak_ | 9.58           | - |
| chr5 | 5001444 | 5001511 | CSAR_peak_ | 7.27           | - |
| chr5 | 5001535 | 5001577 | CSAR_peak_ | 12.13          | - |
| chr5 | 5002048 | 5002097 | CSAR_peak_ | 10.31          | - |
| chr5 | 5002247 | 5002285 | CSAR_peak_ | 8.65           | - |
| chr5 | 5002374 | 5002534 | CSAR_peak_ | 10.83,5.62,7,- | - |
| chr5 | 5002550 | 5002659 | CSAR_peak_ | 19.18,22.56    | - |
| chr5 | 5003507 | 5003557 | CSAR_peak_ | 9.58           | - |
| chr5 | 5003571 | 5003656 | CSAR_peak_ | 20.94,12.74    | - |
| chr5 | 5003882 | 5003964 | CSAR_peak_ | 19.36,18.1     | - |
| chr5 | 5004095 | 5004138 | CSAR_peak_ | 7.27           | - |
| chr5 | 5004154 | 5004173 | CSAR_peak_ | 6.95           | - |

|      |         |         |             |               |   |
|------|---------|---------|-------------|---------------|---|
| chr5 | 5004259 | 5004335 | CSAR_peak_  | 5.97,7.27     | - |
| chr5 | 5004466 | 5004496 | CSAR_peak_  | 14.88         | - |
| chr5 | 5004588 | 5004633 | CSAR_peak_  | 12.13,6.21    | - |
| chr5 | 5004996 | 5005056 | CSAR_peak_  | 7.58          | - |
| chr5 | 5005350 | 5005391 | CSAR_peak_  | 6.21          | - |
| chr5 | 5005466 | 5005519 | CSAR_peak_  | 7.27          | - |
| chr5 | 5005792 | 5005833 | CSAR_peak_  | 8.39          | - |
| chr5 | 5006365 | 5006433 | CSAR_peak_  | 6.81          | - |
| chr5 | 5017185 | 5017230 | CSAR_peak_  | 7.27          | - |
| chr5 | 5024297 | 5024331 | CSAR_peak_  | 9.58          | - |
| chr5 | 5045762 | 5045796 | CSAR_peak_! | 7.27          | - |
| chr5 | 5046167 | 5046201 | CSAR_peak_! | 6.57          | - |
| chr5 | 5047923 | 5048013 | CSAR_peak_! | 7.58,10.82    | - |
| chr5 | 5049810 | 5049854 | CSAR_peak_  | 7.27          | - |
| chr5 | 5050133 | 5050207 | CSAR_peak_  | 9.77,12.17    | - |
| chr5 | 5052274 | 5052323 | CSAR_peak_  | 12.13         | - |
| chr5 | 5052439 | 5052482 | CSAR_peak_  | 10.02         | - |
| chr5 | 5052525 | 5052598 | CSAR_peak_  | 6.57,9.77     | - |
| chr5 | 5052830 | 5052869 | CSAR_peak_  | 7.27          | - |
| chr5 | 5054844 | 5054890 | CSAR_peak_  | 7.34,9.48     | - |
| chr5 | 5055074 | 5055111 | CSAR_peak_  | 9.58          | - |
| chr5 | 5055962 | 5056100 | CSAR_peak_  | 7.27,14.88    | - |
| chr5 | 5057149 | 5057237 | CSAR_peak_  | 7.27,6.21     | - |
| chr5 | 5060353 | 5060410 | CSAR_peak_  | 7.27          | - |
| chr5 | 5068915 | 5068969 | CSAR_peak_  | 7.27          | - |
| chr5 | 5108668 | 5108717 | CSAR_peak_  | 7.27          | - |
| chr5 | 5109544 | 5109570 | CSAR_peak_  | 6.21          | - |
| chr5 | 5144249 | 5144355 | CSAR_peak_  | 12.13,7,6.21  | - |
| chr5 | 5144425 | 5144500 | CSAR_peak_  | 7.27          | - |
| chr5 | 5145749 | 5145800 | CSAR_peak_  | 9.58,7.27     | - |
| chr5 | 5145808 | 5145964 | CSAR_peak_  | 21,23.03,8.14 | - |
| chr5 | 5146115 | 5146162 | CSAR_peak_  | 9.77          | - |
| chr5 | 5176377 | 5176445 | CSAR_peak_  | 6.57,10.83    | - |
| chr5 | 5176558 | 5176641 | CSAR_peak_  | 12.17         | - |
| chr5 | 5177095 | 5177137 | CSAR_peak_  | 10.83         | - |
| chr5 | 5241007 | 5241049 | CSAR_peak_  | 12.13         | - |
| chr5 | 5241832 | 5241893 | CSAR_peak_  | 6.03          | - |
| chr5 | 5242285 | 5242322 | CSAR_peak_  | 6.03          | - |
| chr5 | 5242634 | 5242678 | CSAR_peak_  | 6.21          | - |
| chr5 | 5245259 | 5245354 | CSAR_peak_  | 16.11         | - |
| chr5 | 5260943 | 5260974 | CSAR_peak_  | 7.58          | - |
| chr5 | 5261073 | 5261303 | CSAR_peak_  | 25.12,35.24   | - |

|      |         |         |            |             |   |
|------|---------|---------|------------|-------------|---|
| chr5 | 5261452 | 5261464 | CSAR_peak_ | 6.21        | - |
| chr5 | 5261643 | 5261758 | CSAR_peak_ | 13,16.33    | - |
| chr5 | 5261840 | 5261891 | CSAR_peak_ | 7.58        | - |
| chr5 | 5261914 | 5261994 | CSAR_peak_ | 14.88,14.76 | - |
| chr5 | 5291015 | 5291083 | CSAR_peak_ | 12.13       | - |
| chr5 | 5291170 | 5291244 | CSAR_peak_ | 8.14        | - |
| chr5 | 5291266 | 5291349 | CSAR_peak_ | 7.27        | - |
| chr5 | 5291820 | 5291894 | CSAR_peak_ | 10.83       | - |
| chr5 | 5292081 | 5292142 | CSAR_peak_ | 7.27,9.58   | - |
| chr5 | 5292526 | 5292586 | CSAR_peak_ | 7.27        | - |
| chr5 | 5292606 | 5292642 | CSAR_peak_ | 9.58,7.58   | - |
| chr5 | 5292724 | 5292785 | CSAR_peak_ | 38.71,9.61  | - |
| chr5 | 5292833 | 5292876 | CSAR_peak_ | 7.58        | - |
| chr5 | 5293126 | 5293175 | CSAR_peak_ | 7.27        | - |
| chr5 | 5293500 | 5293540 | CSAR_peak_ | 6.21        | - |
| chr5 | 5293612 | 5293663 | CSAR_peak_ | 6.21        | - |
| chr5 | 5293869 | 5293912 | CSAR_peak_ | 6.05,7.73   | - |
| chr5 | 5294042 | 5294108 | CSAR_peak_ | 9.77        | - |
| chr5 | 5294265 | 5294322 | CSAR_peak_ | 12.13       | - |
| chr5 | 5294669 | 5294706 | CSAR_peak_ | 7.27        | - |
| chr5 | 5294787 | 5294832 | CSAR_peak_ | 10.31       | - |
| chr5 | 5294847 | 5294932 | CSAR_peak_ | 31.2,17.82  | - |
| chr5 | 5295042 | 5295062 | CSAR_peak_ | 20.94       | - |
| chr5 | 5295148 | 5295201 | CSAR_peak_ | 35.83,8.13  | - |
| chr5 | 5295218 | 5295306 | CSAR_peak_ | 8.39,6.21   | - |
| chr5 | 5295716 | 5295774 | CSAR_peak_ | 11.83,15.68 | - |
| chr5 | 5296330 | 5296370 | CSAR_peak_ | 8.28,19.98  | - |
| chr5 | 5296381 | 5296442 | CSAR_peak_ | 17.82,7.27  | - |
| chr5 | 5296910 | 5297014 | CSAR_peak_ | 14.88,7.58  | - |
| chr5 | 5297023 | 5297063 | CSAR_peak_ | 8.39        | - |
| chr5 | 5297753 | 5297812 | CSAR_peak_ | 7.27,7.27   | - |
| chr5 | 5298993 | 5299043 | CSAR_peak_ | 6.21        | - |
| chr5 | 5299762 | 5299830 | CSAR_peak_ | 7.27        | - |
| chr5 | 5299947 | 5300048 | CSAR_peak_ | 14.76,14.76 | - |
| chr5 | 5324368 | 5324412 | CSAR_peak_ | 8.39        | - |
| chr5 | 5325165 | 5325231 | CSAR_peak_ | 12.31,14.88 | - |
| chr5 | 5326621 | 5326676 | CSAR_peak_ | 7.58        | - |
| chr5 | 5327193 | 5327238 | CSAR_peak_ | 10.83       | - |
| chr5 | 5327875 | 5327946 | CSAR_peak_ | 8.39        | - |
| chr5 | 5328417 | 5328433 | CSAR_peak_ | 6.21        | - |
| chr5 | 5328443 | 5328477 | CSAR_peak_ | 17.82       | - |
| chr5 | 5329366 | 5329371 | CSAR_peak_ | 7.27        | - |

|      |         |         |            |                  |   |
|------|---------|---------|------------|------------------|---|
| chr5 | 5329470 | 5329508 | CSAR_peak_ | 7.58             | - |
| chr5 | 5330110 | 5330175 | CSAR_peak_ | 7.58             | - |
| chr5 | 5349647 | 5349698 | CSAR_peak_ | 12.13            | - |
| chr5 | 5355163 | 5355261 | CSAR_peak_ | 8.39,10.02       | - |
| chr5 | 5355272 | 5355434 | CSAR_peak_ | 7.27,22.56,20.94 | - |
| chr5 | 5355478 | 5355601 | CSAR_peak_ | 14.63,12.13      | - |
| chr5 | 5355762 | 5355820 | CSAR_peak_ | 20.94            | - |
| chr5 | 5355837 | 5356012 | CSAR_peak_ | 14.51,20.96      | - |
| chr5 | 5356038 | 5356211 | CSAR_peak_ | 20.94,22.56      | - |
| chr5 | 5356525 | 5356598 | CSAR_peak_ | 7.27,8.39        | - |
| chr5 | 5356771 | 5357060 | CSAR_peak_ | 36.78,9.55,20.94 | - |
| chr5 | 5357096 | 5357116 | CSAR_peak_ | 6.11             | - |
| chr5 | 5357221 | 5357522 | CSAR_peak_ | 13.48,29.2,11.14 | - |
| chr5 | 5357722 | 5357762 | CSAR_peak_ | 7.58             | - |
| chr5 | 5359772 | 5359829 | CSAR_peak_ | 7.27,6.21        | - |
| chr5 | 5361277 | 5361338 | CSAR_peak_ | 6.44             | - |
| chr5 | 5361574 | 5361622 | CSAR_peak_ | 9.77             | - |
| chr5 | 5361790 | 5361834 | CSAR_peak_ | 6.57,5.86        | - |
| chr5 | 5362656 | 5362710 | CSAR_peak_ | 8.39,9.58        | - |
| chr5 | 5395344 | 5395456 | CSAR_peak_ | 12.13,7.92,8.39  | - |
| chr5 | 5407622 | 5407675 | CSAR_peak_ | 7.27             | - |
| chr5 | 5410235 | 5410259 | CSAR_peak_ | 8.39             | - |
| chr5 | 5410363 | 5410408 | CSAR_peak_ | 6.21,13.48       | - |
| chr5 | 5463397 | 5463436 | CSAR_peak_ | 8.39             | - |
| chr5 | 5463575 | 5463634 | CSAR_peak_ | 9.61,10.83       | - |
| chr5 | 5463764 | 5463813 | CSAR_peak_ | 6.21             | - |
| chr5 | 5463976 | 5464002 | CSAR_peak_ | 7.27,9.77        | - |
| chr5 | 5464515 | 5464550 | CSAR_peak_ | 12.13            | - |
| chr5 | 5464697 | 5464766 | CSAR_peak_ | 9.77,11.14       | - |
| chr5 | 5465750 | 5465880 | CSAR_peak_ | 20.43            | - |
| chr5 | 5466415 | 5466469 | CSAR_peak_ | 20.94,12.13      | - |
| chr5 | 5467123 | 5467180 | CSAR_peak_ | 6.21             | - |
| chr5 | 5467737 | 5467790 | CSAR_peak_ | 10.83            | - |
| chr5 | 5467842 | 5467890 | CSAR_peak_ | 9.58,9.58        | - |
| chr5 | 5467942 | 5468021 | CSAR_peak_ | 10.83,7.27       | - |
| chr5 | 5468046 | 5468128 | CSAR_peak_ | 12.31            | - |
| chr5 | 5468181 | 5468255 | CSAR_peak_ | 12.31            | - |
| chr5 | 5468459 | 5468546 | CSAR_peak_ | 19.36            | - |
| chr5 | 5468988 | 5469098 | CSAR_peak_ | 7.27,12.13       | - |
| chr5 | 5469555 | 5469592 | CSAR_peak_ | 10.83            | - |
| chr5 | 5470715 | 5470773 | CSAR_peak_ | 9.77,7.58        | - |
| chr5 | 5471102 | 5471145 | CSAR_peak_ | 8.39             | - |

|      |         |         |            |                |   |
|------|---------|---------|------------|----------------|---|
| chr5 | 5471433 | 5471495 | CSAR_peak_ | 18.65          | - |
| chr5 | 5471692 | 5471722 | CSAR_peak_ | 7.27           | - |
| chr5 | 5471744 | 5471763 | CSAR_peak_ | 12.6,8.5       | - |
| chr5 | 5471884 | 5471937 | CSAR_peak_ | 39.13,26.8     | - |
| chr5 | 5472529 | 5472633 | CSAR_peak_ | 16.33,12.13    | - |
| chr5 | 5472954 | 5473013 | CSAR_peak_ | 16.33          | - |
| chr5 | 5473265 | 5473296 | CSAR_peak_ | 16.33          | - |
| chr5 | 5473378 | 5473402 | CSAR_peak_ | 12.17          | - |
| chr5 | 5517792 | 5517862 | CSAR_peak_ | 19.36          | - |
| chr5 | 5517965 | 5518029 | CSAR_peak_ | 14.88          | - |
| chr5 | 5518361 | 5518371 | CSAR_peak_ | 9.61,13.48     | - |
| chr5 | 5518499 | 5518558 | CSAR_peak_ | 29.2,11.07     | - |
| chr5 | 5518686 | 5518737 | CSAR_peak_ | 13.48          | - |
| chr5 | 5518767 | 5518918 | CSAR_peak_ | 9.58,10.31     | - |
| chr5 | 5519399 | 5519451 | CSAR_peak_ | 9.55,12.13     | - |
| chr5 | 5519598 | 5519683 | CSAR_peak_ | 10.95,6.21     | - |
| chr5 | 5519773 | 5519804 | CSAR_peak_ | 7.27,6.21      | - |
| chr5 | 5520217 | 5520236 | CSAR_peak_ | 6.21           | - |
| chr5 | 5520244 | 5520306 | CSAR_peak_ | 19.68,8.94     | - |
| chr5 | 5520384 | 5520431 | CSAR_peak_ | 16.33,8.5      | - |
| chr5 | 5520798 | 5520899 | CSAR_peak_ | 24.21,12.13    | - |
| chr5 | 5521016 | 5521156 | CSAR_peak_ | 8.09,7.27,7.2  | - |
| chr5 | 5521358 | 5521439 | CSAR_peak_ | 17.51          | - |
| chr5 | 5521490 | 5521513 | CSAR_peak_ | 6.85           | - |
| chr5 | 5521548 | 5521589 | CSAR_peak_ | 6.21           | - |
| chr5 | 5524990 | 5525040 | CSAR_peak_ | 23.03,16.34    | - |
| chr5 | 5525141 | 5525256 | CSAR_peak_ | 37.42,14.92,(- | - |
| chr5 | 5526972 | 5527085 | CSAR_peak_ | 10.83,17.82    | - |
| chr5 | 5527164 | 5527246 | CSAR_peak_ | 16.34          | - |
| chr5 | 5527432 | 5527479 | CSAR_peak_ | 10.83,10.02    | - |
| chr5 | 5527739 | 5527842 | CSAR_peak_ | 14.88,9.77     | - |
| chr5 | 5528766 | 5528829 | CSAR_peak_ | 9.27           | - |
| chr5 | 5529240 | 5529302 | CSAR_peak_ | 7.58           | - |
| chr5 | 5529639 | 5529684 | CSAR_peak_ | 13.51,8.39     | - |
| chr5 | 5529696 | 5529797 | CSAR_peak_ | 9.77,7.27      | - |
| chr5 | 5532767 | 5532824 | CSAR_peak_ | 9.58,16.11     | - |
| chr5 | 5533071 | 5533135 | CSAR_peak_ | 7.27,10.83     | - |
| chr5 | 5533164 | 5533362 | CSAR_peak_ | 6.81,26.55,5(- | - |
| chr5 | 5533406 | 5533495 | CSAR_peak_ | 17.35,11.66    | - |
| chr5 | 5533544 | 5533594 | CSAR_peak_ | 13.44,6.64     | - |
| chr5 | 5533676 | 5533756 | CSAR_peak_ | 7.27,7.27      | - |
| chr5 | 5533856 | 5533938 | CSAR_peak_ | 16.11,6.21     | - |

|      |         |         |            |                |   |
|------|---------|---------|------------|----------------|---|
| chr5 | 5533967 | 5534052 | CSAR_peak_ | 31.2,18.73     | - |
| chr5 | 5534159 | 5534232 | CSAR_peak_ | 26.69,22.74    | - |
| chr5 | 5534502 | 5534630 | CSAR_peak_ | 42.59,16.25    | - |
| chr5 | 5534721 | 5534793 | CSAR_peak_ | 14.76,22.56    | - |
| chr5 | 5534933 | 5535062 | CSAR_peak_ | 34.08,34.53,   | - |
| chr5 | 5535145 | 5535216 | CSAR_peak_ | 13.66,12.31    | - |
| chr5 | 5547918 | 5547961 | CSAR_peak_ | 10.83          | - |
| chr5 | 5575003 | 5575054 | CSAR_peak_ | 7.27           | - |
| chr5 | 5575183 | 5575220 | CSAR_peak_ | 6.21           | - |
| chr5 | 5576604 | 5576645 | CSAR_peak_ | 7.27           | - |
| chr5 | 5585772 | 5585805 | CSAR_peak_ | 8.14           | - |
| chr5 | 5615186 | 5615215 | CSAR_peak_ | 5.86           | - |
| chr5 | 5659808 | 5659862 | CSAR_peak_ | 10.83,7.27     | - |
| chr5 | 5659929 | 5659992 | CSAR_peak_ | 9.77           | - |
| chr5 | 5660120 | 5660224 | CSAR_peak_ | 7.27,9.58      | - |
| chr5 | 5660256 | 5660300 | CSAR_peak_ | 12.13,7.27     | - |
| chr5 | 5660448 | 5660472 | CSAR_peak_ | 7.27           | - |
| chr5 | 5660629 | 5660684 | CSAR_peak_ | 6.57,9.61      | - |
| chr5 | 5660954 | 5660974 | CSAR_peak_ | 6.03           | - |
| chr5 | 5661515 | 5661566 | CSAR_peak_ | 16.33,12.17    | - |
| chr5 | 5661643 | 5661716 | CSAR_peak_ | 12.17,12.13    | - |
| chr5 | 5671185 | 5671235 | CSAR_peak_ | 14.88          | - |
| chr5 | 5671590 | 5671627 | CSAR_peak_ | 6.21           | - |
| chr5 | 5674229 | 5674282 | CSAR_peak_ | 13.2,17.78     | - |
| chr5 | 5674442 | 5674503 | CSAR_peak_ | 9.87,8.81,16.  | - |
| chr5 | 5674600 | 5674677 | CSAR_peak_ | 79.79,6.92,7!  | - |
| chr5 | 5674796 | 5674959 | CSAR_peak_ | 60.35,18.82,   | - |
| chr5 | 5689492 | 5689556 | CSAR_peak_ | 8.39           | - |
| chr5 | 5690503 | 5690638 | CSAR_peak_ | 21.56,16.11    | - |
| chr5 | 5690696 | 5690809 | CSAR_peak_ | 16.33,9.58     | - |
| chr5 | 5690857 | 5690898 | CSAR_peak_ | 12.13          | - |
| chr5 | 5691053 | 5691293 | CSAR_peak_ | 17.82,23.49,   | - |
| chr5 | 5691332 | 5691465 | CSAR_peak_ | 17.35,21.56,   | - |
| chr5 | 5691632 | 5691787 | CSAR_peak_ | 8.14,15.96,1:  | - |
| chr5 | 5691789 | 5692043 | CSAR_peak_ | 21.35,8.2,6.5- | - |
| chr5 | 5692051 | 5692213 | CSAR_peak_ | 8.39,11.63,8.- | - |
| chr5 | 5692396 | 5692482 | CSAR_peak_ | 29.4,27.77     | - |
| chr5 | 5692534 | 5692596 | CSAR_peak_ | 9.77,22.56     | - |
| chr5 | 5698501 | 5698568 | CSAR_peak_ | 7.27           | - |
| chr5 | 5698592 | 5698612 | CSAR_peak_ | 9.58           | - |
| chr5 | 5698730 | 5698783 | CSAR_peak_ | 12.13          | - |
| chr5 | 5699086 | 5699159 | CSAR_peak_ | 6.95,5.86,9.5- | - |

|      |         |         |             |                |   |
|------|---------|---------|-------------|----------------|---|
| chr5 | 5699298 | 5699316 | CSAR_peak_  | 8.39           | - |
| chr5 | 5700103 | 5700125 | CSAR_peak_  | 7.58           | - |
| chr5 | 5721817 | 5721897 | CSAR_peak_  | 7.78,12.13     | - |
| chr5 | 5722394 | 5722435 | CSAR_peak_  | 6.21           | - |
| chr5 | 5723314 | 5723361 | CSAR_peak_  | 12.17,9.77     | - |
| chr5 | 5723982 | 5724042 | CSAR_peak_  | 6.21           | - |
| chr5 | 5724429 | 5724471 | CSAR_peak_  | 7.27           | - |
| chr5 | 5725462 | 5725576 | CSAR_peak_  | 6.21,12.31     | - |
| chr5 | 5756713 | 5756780 | CSAR_peak_  | 8.39           | - |
| chr5 | 5757135 | 5757190 | CSAR_peak_  | 14.88          | - |
| chr5 | 5757427 | 5757465 | CSAR_peak_  | 7.58           | - |
| chr5 | 5757553 | 5757667 | CSAR_peak_  | 16.33,12.13    | - |
| chr5 | 5757669 | 5758491 | CSAR_peak_  | 38.35,40.88,(- | - |
| chr5 | 5758501 | 5758574 | CSAR_peak_  | 20.43          | - |
| chr5 | 5758646 | 5758814 | CSAR_peak_  | 15.2,17.82     | - |
| chr5 | 5758844 | 5758956 | CSAR_peak_  | 23.8,37.97,1!  | - |
| chr5 | 5758958 | 5759148 | CSAR_peak_  | 41.7,60.8      | - |
| chr5 | 5759189 | 5759231 | CSAR_peak_  | 9.58           | - |
| chr5 | 5759279 | 5759347 | CSAR_peak_  | 13.48,19.36    | - |
| chr5 | 5759430 | 5759679 | CSAR_peak_  | 20.17,13.92,(- | - |
| chr5 | 5770865 | 5770968 | CSAR_peak_  | 9.58,8.95      | - |
| chr5 | 5829301 | 5829377 | CSAR_peak_! | 5.86           | - |
| chr5 | 5829481 | 5829527 | CSAR_peak_  | 7.27           | - |
| chr5 | 5840560 | 5840591 | CSAR_peak_  | 6.21           | - |
| chr5 | 5860759 | 5860818 | CSAR_peak_! | 5.86           | - |
| chr5 | 5864435 | 5864482 | CSAR_peak_  | 9.58           | - |
| chr5 | 5864854 | 5864933 | CSAR_peak_  | 7.27,12.13     | - |
| chr5 | 5865405 | 5865478 | CSAR_peak_  | 14.88          | - |
| chr5 | 5865583 | 5865639 | CSAR_peak_  | 7.92           | - |
| chr5 | 5866160 | 5866187 | CSAR_peak_  | 6.21           | - |
| chr5 | 5988154 | 5988227 | CSAR_peak_  | 10.83,9.77     | - |
| chr5 | 5989021 | 5989058 | CSAR_peak_  | 6.02           | - |
| chr5 | 5990011 | 5990139 | CSAR_peak_  | 8.09,7.27,6.0- | - |
| chr5 | 5999384 | 5999438 | CSAR_peak_  | 8.39           | - |
| chr5 | 6000091 | 6000114 | CSAR_peak_  | 6.95           | - |
| chr5 | 6000194 | 6000249 | CSAR_peak_  | 9.58,14.88     | - |
| chr5 | 6010048 | 6010114 | CSAR_peak_  | 14.88          | - |
| chr5 | 6010148 | 6010289 | CSAR_peak_  | 8.39,8.28      | - |
| chr5 | 6010375 | 6010445 | CSAR_peak_  | 9.58,7.92      | - |
| chr5 | 6010544 | 6010555 | CSAR_peak_  | 6.44           | - |
| chr5 | 6010645 | 6010681 | CSAR_peak_  | 12.74          | - |
| chr5 | 6010937 | 6010978 | CSAR_peak_  | 7.92           | - |



|      |         |                     |                  |
|------|---------|---------------------|------------------|
| chr5 | 6010990 | 6011028 CSAR_peak_  | 6.21 -           |
| chr5 | 6011429 | 6011493 CSAR_peak_  | 16.11 -          |
| chr5 | 6012113 | 6012157 CSAR_peak_! | 10.82 -          |
| chr5 | 6012301 | 6012382 CSAR_peak_  | 22.56,7,16.8 -   |
| chr5 | 6012675 | 6012764 CSAR_peak_  | 19.96,14.85 -    |
| chr5 | 6012819 | 6012883 CSAR_peak_  | 14.88,10.95 -    |
| chr5 | 6013159 | 6013196 CSAR_peak_! | 10.82 -          |
| chr5 | 6013385 | 6013476 CSAR_peak_  | 8.65,6.21 -      |
| chr5 | 6013483 | 6013531 CSAR_peak_  | 8.95 -           |
| chr5 | 6013634 | 6013687 CSAR_peak_  | 8.52 -           |
| chr5 | 6013999 | 6014051 CSAR_peak_  | 9.58 -           |
| chr5 | 6014164 | 6014214 CSAR_peak_  | 8.39 -           |
| chr5 | 6021766 | 6021938 CSAR_peak_  | 21.37,17.87 -    |
| chr5 | 6022080 | 6022121 CSAR_peak_  | 8.39 -           |
| chr5 | 6022253 | 6022292 CSAR_peak_  | 12.13 -          |
| chr5 | 6022356 | 6022414 CSAR_peak_  | 6.21,7.58 -      |
| chr5 | 6022794 | 6022837 CSAR_peak_  | 8.39 -           |
| chr5 | 6023516 | 6023590 CSAR_peak_  | 16.33,19.68 -    |
| chr5 | 6023896 | 6023921 CSAR_peak_  | 20.13 -          |
| chr5 | 6024460 | 6024564 CSAR_peak_  | 8.14,12.5,7.2 -  |
| chr5 | 6024857 | 6024960 CSAR_peak_! | 5.86,14.92,14. - |
| chr5 | 6025056 | 6025120 CSAR_peak_  | 19.36,31.2 -     |
| chr5 | 6025136 | 6025194 CSAR_peak_  | 9.58,9.58 -      |
| chr5 | 6025297 | 6025374 CSAR_peak_  | 19.36,6.21 -     |
| chr5 | 6025586 | 6025626 CSAR_peak_  | 8.13,12.13 -     |
| chr5 | 6025866 | 6025939 CSAR_peak_  | 7.92,9.58 -      |
| chr5 | 6026386 | 6026438 CSAR_peak_! | 8.2 -            |
| chr5 | 6026491 | 6026542 CSAR_peak_  | 6.21 -           |
| chr5 | 6026952 | 6027019 CSAR_peak_  | 7.58,10.31 -     |
| chr5 | 6052106 | 6052191 CSAR_peak_  | 12.13 -          |
| chr5 | 6052602 | 6052666 CSAR_peak_  | 9.77,8.28 -      |
| chr5 | 6052747 | 6052759 CSAR_peak_  | 7.92 -           |
| chr5 | 6082288 | 6082333 CSAR_peak_  | 6.21 -           |
| chr5 | 6082619 | 6082714 CSAR_peak_! | 7 -              |
| chr5 | 6083662 | 6083729 CSAR_peak_  | 10.83,9.77 -     |
| chr5 | 6083960 | 6084014 CSAR_peak_  | 9.58 -           |
| chr5 | 6085369 | 6085405 CSAR_peak_  | 10.83 -          |
| chr5 | 6086907 | 6087003 CSAR_peak_  | 12.13 -          |
| chr5 | 6087107 | 6087157 CSAR_peak_  | 7.27 -           |
| chr5 | 6087437 | 6087479 CSAR_peak_  | 7.27 -           |
| chr5 | 6087708 | 6087771 CSAR_peak_  | 13.48 -          |
| chr5 | 6087814 | 6087863 CSAR_peak_  | 7.27 -           |

|      |         |         |            |               |   |
|------|---------|---------|------------|---------------|---|
| chr5 | 6087940 | 6087995 | CSAR_peak_ | 17.82         | - |
| chr5 | 6088168 | 6088264 | CSAR_peak_ | 8.39,12.17    | - |
| chr5 | 6088313 | 6088398 | CSAR_peak_ | 20.43,7.27    | - |
| chr5 | 6088474 | 6088570 | CSAR_peak_ | 19.36,13.44   | - |
| chr5 | 6088596 | 6088646 | CSAR_peak_ | 7.27,9.58     | - |
| chr5 | 6090154 | 6090223 | CSAR_peak_ | 14.76         | - |
| chr5 | 6090319 | 6090361 | CSAR_peak_ | 6.1           | - |
| chr5 | 6090645 | 6090743 | CSAR_peak_ | 9.58,12.13    | - |
| chr5 | 6093265 | 6093289 | CSAR_peak_ | 6.21          | - |
| chr5 | 6093454 | 6093491 | CSAR_peak_ | 9.58          | - |
| chr5 | 6093496 | 6093533 | CSAR_peak_ | 10.83         | - |
| chr5 | 6094014 | 6094106 | CSAR_peak_ | 19.98,9.55,7. | - |
| chr5 | 6094233 | 6094383 | CSAR_peak_ | 11.14,7.27    | - |
| chr5 | 6094452 | 6094499 | CSAR_peak_ | 8.39          | - |
| chr5 | 6094508 | 6094517 | CSAR_peak_ | 7.26          | - |
| chr5 | 6094542 | 6094573 | CSAR_peak_ | 10.12         | - |
| chr5 | 6094874 | 6094915 | CSAR_peak_ | 9.77          | - |
| chr5 | 6098700 | 6098754 | CSAR_peak_ | 13.48         | - |
| chr5 | 6099650 | 6099673 | CSAR_peak_ | 6.21          | - |
| chr5 | 6099766 | 6099807 | CSAR_peak_ | 9.58          | - |
| chr5 | 6101546 | 6101599 | CSAR_peak_ | 8.39,11.38    | - |
| chr5 | 6101837 | 6101869 | CSAR_peak_ | 6.21          | - |
| chr5 | 6102806 | 6102833 | CSAR_peak_ | 6.21          | - |
| chr5 | 6103524 | 6103564 | CSAR_peak_ | 7.58          | - |
| chr5 | 6106611 | 6106648 | CSAR_peak_ | 6.21          | - |
| chr5 | 6107059 | 6107090 | CSAR_peak_ | 6.21          | - |
| chr5 | 6107108 | 6107162 | CSAR_peak_ | 6.21          | - |
| chr5 | 6107697 | 6107747 | CSAR_peak_ | 14.76         | - |
| chr5 | 6109294 | 6109344 | CSAR_peak_ | 6.21          | - |
| chr5 | 6132552 | 6132605 | CSAR_peak_ | 6.21,9.77     | - |
| chr5 | 6147040 | 6147088 | CSAR_peak_ | 13.48         | - |
| chr5 | 6147544 | 6147561 | CSAR_peak_ | 8.39          | - |
| chr5 | 6147636 | 6147672 | CSAR_peak_ | 10.95         | - |
| chr5 | 6151695 | 6151740 | CSAR_peak_ | 9.58          | - |
| chr5 | 6153320 | 6153367 | CSAR_peak_ | 7.27          | - |
| chr5 | 6178938 | 6179007 | CSAR_peak_ | 31.2          | - |
| chr5 | 6179012 | 6179121 | CSAR_peak_ | 6.87,10.82    | - |
| chr5 | 6180112 | 6180150 | CSAR_peak_ | 7.27          | - |
| chr5 | 6180202 | 6180324 | CSAR_peak_ | 6.94,10.02,7. | - |
| chr5 | 6180403 | 6180506 | CSAR_peak_ | 16.33,12.31   | - |
| chr5 | 6180866 | 6180935 | CSAR_peak_ | 12.31         | - |
| chr5 | 6181368 | 6181418 | CSAR_peak_ | 9.58          | - |

|      |         |         |            |                |   |
|------|---------|---------|------------|----------------|---|
| chr5 | 6181702 | 6181784 | CSAR_peak_ | 12.17,9.58     | - |
| chr5 | 6182149 | 6182247 | CSAR_peak_ | 28.34,19.36    | - |
| chr5 | 6196870 | 6196944 | CSAR_peak_ | 7.58           | - |
| chr5 | 6197211 | 6197300 | CSAR_peak_ | 8.95           | - |
| chr5 | 6198626 | 6198689 | CSAR_peak_ | 12.13,6.21     | - |
| chr5 | 6198960 | 6198999 | CSAR_peak_ | 6.21           | - |
| chr5 | 6201514 | 6201538 | CSAR_peak_ | 6.21           | - |
| chr5 | 6201846 | 6201929 | CSAR_peak_ | 8.39           | - |
| chr5 | 6201944 | 6201997 | CSAR_peak_ | 7.27           | - |
| chr5 | 6228434 | 6228508 | CSAR_peak_ | 8.39           | - |
| chr5 | 6228691 | 6228831 | CSAR_peak_ | 17.82          | - |
| chr5 | 6229066 | 6229109 | CSAR_peak_ | 12.13          | - |
| chr5 | 6229347 | 6229412 | CSAR_peak_ | 18.85,34.89    | - |
| chr5 | 6229455 | 6229606 | CSAR_peak_ | 27.64,12.31,(- | - |
| chr5 | 6230143 | 6230196 | CSAR_peak_ | 9.58           | - |
| chr5 | 6258324 | 6258374 | CSAR_peak_ | 6.21           | - |
| chr5 | 6258780 | 6258848 | CSAR_peak_ | 7.92           | - |
| chr5 | 6258995 | 6259025 | CSAR_peak_ | 6.21           | - |
| chr5 | 6345146 | 6345405 | CSAR_peak_ | 14.88,8.28,1(- | - |
| chr5 | 6345505 | 6345652 | CSAR_peak_ | 9.58           | - |
| chr5 | 6345807 | 6345824 | CSAR_peak_ | 8.65           | - |
| chr5 | 6345908 | 6345979 | CSAR_peak_ | 10.53,13.51    | - |
| chr5 | 6345981 | 6346063 | CSAR_peak_ | 12.13,12.6     | - |
| chr5 | 6346101 | 6346120 | CSAR_peak_ | 12.13,12.17,(- | - |
| chr5 | 6346203 | 6346256 | CSAR_peak_ | 44.49,7,14.3(- | - |
| chr5 | 6346305 | 6346410 | CSAR_peak_ | 11.96,9.55,1(- | - |
| chr5 | 6346422 | 6346584 | CSAR_peak_ | 33.03,33.31    | - |
| chr5 | 6346723 | 6346783 | CSAR_peak_ | 18.73          | - |
| chr5 | 6346864 | 6346919 | CSAR_peak_ | 13.51,22.56    | - |
| chr5 | 6347360 | 6347395 | CSAR_peak_ | 6.21           | - |
| chr5 | 6347653 | 6347700 | CSAR_peak_ | 8.95           | - |
| chr5 | 6347848 | 6347889 | CSAR_peak_ | 8.39           | - |
| chr5 | 6408120 | 6408196 | CSAR_peak_ | 11.03          | - |
| chr5 | 6411836 | 6411881 | CSAR_peak_ | 6.78           | - |
| chr5 | 6411984 | 6412119 | CSAR_peak_ | 16.11,22.56    | - |
| chr5 | 6412291 | 6412335 | CSAR_peak_ | 6.81           | - |
| chr5 | 6412391 | 6412484 | CSAR_peak_ | 22.85,21.22    | - |
| chr5 | 6412797 | 6412876 | CSAR_peak_ | 13.29,13       | - |
| chr5 | 6412952 | 6413055 | CSAR_peak_ | 25.91,7.58     | - |
| chr5 | 6413148 | 6413195 | CSAR_peak_ | 12.74          | - |
| chr5 | 6463878 | 6463953 | CSAR_peak_ | 6.21           | - |
| chr5 | 6463995 | 6464033 | CSAR_peak_ | 18.49,18.61    | - |

|      |         |         |            |                |   |
|------|---------|---------|------------|----------------|---|
| chr5 | 6464130 | 6464191 | CSAR_peak_ | 24.52,36.74    | - |
| chr5 | 6464291 | 6464356 | CSAR_peak_ | 23.95,24.21    | - |
| chr5 | 6464393 | 6464423 | CSAR_peak_ | 8.5,6.21       | - |
| chr5 | 6464492 | 6464563 | CSAR_peak_ | 9.72,12.6      | - |
| chr5 | 6464695 | 6464797 | CSAR_peak_ | 9.58,25.62     | - |
| chr5 | 6464874 | 6464958 | CSAR_peak_ | 17.82,6.78     | - |
| chr5 | 6465166 | 6465214 | CSAR_peak_ | 7.27           | - |
| chr5 | 6465255 | 6465379 | CSAR_peak_ | 10.53,11.35    | - |
| chr5 | 6465408 | 6465502 | CSAR_peak_ | 8.95,9.97      | - |
| chr5 | 6465604 | 6465660 | CSAR_peak_ | 25.91          | - |
| chr5 | 6465743 | 6465827 | CSAR_peak_ | 25.91,10.96    | - |
| chr5 | 6465866 | 6465964 | CSAR_peak_ | 10.76,21.53    | - |
| chr5 | 6465972 | 6465988 | CSAR_peak_ | 6.45           | - |
| chr5 | 6466056 | 6466220 | CSAR_peak_ | 12.14,12.13    | - |
| chr5 | 6466355 | 6466396 | CSAR_peak_ | 7.27           | - |
| chr5 | 6466679 | 6466731 | CSAR_peak_ | 7.27,12.13     | - |
| chr5 | 6505345 | 6505394 | CSAR_peak_ | 9.48           | - |
| chr5 | 6508105 | 6508216 | CSAR_peak_ | 17.82,17.82    | - |
| chr5 | 6508282 | 6508318 | CSAR_peak_ | 16.33          | - |
| chr5 | 6508374 | 6508407 | CSAR_peak_ | 6.44           | - |
| chr5 | 6508496 | 6508555 | CSAR_peak_ | 6.45,16.11     | - |
| chr5 | 6508769 | 6508806 | CSAR_peak_ | 6.81           | - |
| chr5 | 6509082 | 6509139 | CSAR_peak_ | 7.27,12.13     | - |
| chr5 | 6509404 | 6509444 | CSAR_peak_ | 9.58           | - |
| chr5 | 6509536 | 6509668 | CSAR_peak_ | 20.94,13.44,(- | - |
| chr5 | 6509822 | 6509882 | CSAR_peak_ | 8.13,7.51      | - |
| chr5 | 6510013 | 6510100 | CSAR_peak_ | 8.39           | - |
| chr5 | 6510192 | 6510215 | CSAR_peak_ | 8.39           | - |
| chr5 | 6510313 | 6510321 | CSAR_peak_ | 12.13          | - |
| chr5 | 6510742 | 6510805 | CSAR_peak_ | 17.51,8.13     | - |
| chr5 | 6511309 | 6511404 | CSAR_peak_ | 6.21,7.27,10.- | - |
| chr5 | 6511495 | 6511536 | CSAR_peak_ | 10.7,9.77,8.1- | - |
| chr5 | 6511662 | 6511709 | CSAR_peak_ | 7.27           | - |
| chr5 | 6512233 | 6512286 | CSAR_peak_ | 5.9,6.64       | - |
| chr5 | 6512296 | 6512367 | CSAR_peak_ | 9.32,23.42     | - |
| chr5 | 6512449 | 6512471 | CSAR_peak_ | 22.41          | - |
| chr5 | 6512613 | 6512717 | CSAR_peak_ | 8.39,6.21      | - |
| chr5 | 6525344 | 6525387 | CSAR_peak_ | 7.27           | - |
| chr5 | 6559216 | 6559299 | CSAR_peak_ | 11.63          | - |
| chr5 | 6559301 | 6559413 | CSAR_peak_ | 12.72,12.17    | - |
| chr5 | 6559509 | 6559675 | CSAR_peak_ | 6.57,18.65,1:- | - |
| chr5 | 6559678 | 6559712 | CSAR_peak_ | 10.02,10.83    | - |

|      |         |         |             |                |
|------|---------|---------|-------------|----------------|
| chr5 | 6559803 | 6559926 | CSAR_peak_  | 14.88,17.82,-  |
| chr5 | 6559990 | 6560123 | CSAR_peak_  | 14.34,8.95 -   |
| chr5 | 6560448 | 6560557 | CSAR_peak_  | 13.48,7.73 -   |
| chr5 | 6560648 | 6560696 | CSAR_peak_  | 6.21 -         |
| chr5 | 6560723 | 6560772 | CSAR_peak_  | 7.58 -         |
| chr5 | 6560967 | 6561035 | CSAR_peak_  | 9.58 -         |
| chr5 | 6561072 | 6561257 | CSAR_peak_  | 14.85,22.52,-  |
| chr5 | 6561347 | 6561389 | CSAR_peak_  | 6.21 -         |
| chr5 | 6575308 | 6575383 | CSAR_peak_  | 7.27,7.92 -    |
| chr5 | 6582355 | 6582399 | CSAR_peak_! | 9.58 -         |
| chr5 | 6589206 | 6589273 | CSAR_peak_  | 7.58,7.27 -    |
| chr5 | 6589430 | 6589518 | CSAR_peak_  | 19.8,6.95 -    |
| chr5 | 6590054 | 6590148 | CSAR_peak_  | 7.58,9.58 -    |
| chr5 | 6590235 | 6590322 | CSAR_peak_  | 12.13,10.94 -  |
| chr5 | 6590326 | 6590338 | CSAR_peak_  | 8.39 -         |
| chr5 | 6590614 | 6590654 | CSAR_peak_  | 7.27 -         |
| chr5 | 6590788 | 6590863 | CSAR_peak_  | 12.31,17.82 -  |
| chr5 | 6591040 | 6591096 | CSAR_peak_  | 12.13,8.65 -   |
| chr5 | 6611746 | 6611813 | CSAR_peak_  | 7.27 -         |
| chr5 | 6613368 | 6613416 | CSAR_peak_  | 7.27 -         |
| chr5 | 6613539 | 6613589 | CSAR_peak_  | 9.58 -         |
| chr5 | 6614164 | 6614276 | CSAR_peak_  | 11.96,14.08 -  |
| chr5 | 6614369 | 6614439 | CSAR_peak_  | 17.82 -        |
| chr5 | 6642322 | 6642360 | CSAR_peak_! | 5.86 -         |
| chr5 | 6642509 | 6642569 | CSAR_peak_  | 9.77 -         |
| chr5 | 6644932 | 6644978 | CSAR_peak_  | 10.02 -        |
| chr5 | 6682580 | 6682684 | CSAR_peak_  | 12.13,6.21 -   |
| chr5 | 6682949 | 6683028 | CSAR_peak_  | 7.73,7.27 -    |
| chr5 | 6683052 | 6683088 | CSAR_peak_  | 11.14,6.57 -   |
| chr5 | 6683145 | 6683304 | CSAR_peak_  | 30.8,22.09 -   |
| chr5 | 6683567 | 6683626 | CSAR_peak_  | 24.21 -        |
| chr5 | 6683799 | 6684019 | CSAR_peak_  | 8.94,20.43,2(- |
| chr5 | 6684055 | 6684114 | CSAR_peak_  | 26.55,16.08 -  |
| chr5 | 6684237 | 6684321 | CSAR_peak_  | 20.43,7.34 -   |
| chr5 | 6684327 | 6684527 | CSAR_peak_! | 5.86,27.73,5(- |
| chr5 | 6695366 | 6695413 | CSAR_peak_  | 12.13 -        |
| chr5 | 6695821 | 6695931 | CSAR_peak_  | 29.14,12.31 -  |
| chr5 | 6695991 | 6696081 | CSAR_peak_  | 42.64,9.72 -   |
| chr5 | 6696147 | 6696237 | CSAR_peak_  | 31.2,6.64,8.1- |
| chr5 | 6696440 | 6696469 | CSAR_peak_  | 7.27 -         |
| chr5 | 6696566 | 6696608 | CSAR_peak_  | 6.21 -         |
| chr5 | 6696624 | 6696668 | CSAR_peak_  | 6.44 -         |

|      |         |         |            |                |   |
|------|---------|---------|------------|----------------|---|
| chr5 | 6696858 | 6696884 | CSAR_peak_ | 12.17          | - |
| chr5 | 6696905 | 6696987 | CSAR_peak_ | 6.21           | - |
| chr5 | 6697141 | 6697200 | CSAR_peak_ | 25.48,6.78     | - |
| chr5 | 6697260 | 6697444 | CSAR_peak_ | 27.67,10.33,(- |   |
| chr5 | 6697776 | 6697865 | CSAR_peak_ | 27.11,10.83,(- |   |
| chr5 | 6697921 | 6698049 | CSAR_peak_ | 9.58           | - |
| chr5 | 6698177 | 6698265 | CSAR_peak_ | 7.27,8.39      | - |
| chr5 | 6698288 | 6698333 | CSAR_peak_ | 6.21           | - |
| chr5 | 6698353 | 6698460 | CSAR_peak_ | 7.27,7.58      | - |
| chr5 | 6698634 | 6698676 | CSAR_peak_ | 6.03           | - |
| chr5 | 6698879 | 6698954 | CSAR_peak_ | 7.27,7.27      | - |
| chr5 | 6699039 | 6699102 | CSAR_peak_ | 9.35,13.89,5.- |   |
| chr5 | 6699296 | 6699362 | CSAR_peak_ | 17.51,6.21     | - |
| chr5 | 6699475 | 6699523 | CSAR_peak_ | 19.36,12.13    | - |
| chr5 | 6699721 | 6699779 | CSAR_peak_ | 9.58           | - |
| chr5 | 6700015 | 6700055 | CSAR_peak_ | 7.27           | - |
| chr5 | 6700127 | 6700296 | CSAR_peak_ | 10.83,15.43    | - |
| chr5 | 6700345 | 6700372 | CSAR_peak_ | 6.21           | - |
| chr5 | 6700439 | 6700528 | CSAR_peak_ | 9.58,9.58      | - |
| chr5 | 6700541 | 6700584 | CSAR_peak_ | 7.27           | - |
| chr5 | 6712123 | 6712235 | CSAR_peak_ | 8.39,9.58      | - |
| chr5 | 6712243 | 6712280 | CSAR_peak_ | 7.34           | - |
| chr5 | 6712390 | 6712477 | CSAR_peak_ | 9.58,6.81,6.9- |   |
| chr5 | 6712635 | 6712708 | CSAR_peak_ | 13.48,11.14    | - |
| chr5 | 6712795 | 6712847 | CSAR_peak_ | 9.77           | - |
| chr5 | 6713164 | 6713232 | CSAR_peak_ | 14.85          | - |
| chr5 | 6713303 | 6713363 | CSAR_peak_ | 12.13          | - |
| chr5 | 6714531 | 6714581 | CSAR_peak_ | 17.37,6.78     | - |
| chr5 | 6715340 | 6715364 | CSAR_peak_ | 6.44,9.31      | - |
| chr5 | 6727565 | 6727606 | CSAR_peak_ | 7.27           | - |
| chr5 | 6728495 | 6728695 | CSAR_peak_ | 33.31,22.69    | - |
| chr5 | 6728749 | 6728850 | CSAR_peak_ | 9.77,5.86      | - |
| chr5 | 6728963 | 6728987 | CSAR_peak_ | 7.58           | - |
| chr5 | 6729181 | 6729304 | CSAR_peak_ | 11.03,10.82,(- |   |
| chr5 | 6729656 | 6729754 | CSAR_peak_ | 6.21           | - |
| chr5 | 6791642 | 6791701 | CSAR_peak_ | 9.58,6.21      | - |
| chr5 | 6845331 | 6845378 | CSAR_peak_ | 7.27           | - |
| chr5 | 6846997 | 6847038 | CSAR_peak_ | 25.91,10.83    | - |
| chr5 | 6847153 | 6847237 | CSAR_peak_ | 24.21,23.49    | - |
| chr5 | 6847846 | 6848040 | CSAR_peak_ | 10.82,9.79,1(- |   |
| chr5 | 6848377 | 6848447 | CSAR_peak_ | 7.27,9.58      | - |
| chr5 | 6848485 | 6848550 | CSAR_peak_ | 12.13,17.82    | - |

|      |         |         |            |                |
|------|---------|---------|------------|----------------|
| chr5 | 6848612 | 6848673 | CSAR_peak_ | 12.59,10.83,-  |
| chr5 | 6849090 | 6849182 | CSAR_peak_ | 6.72,10.83 -   |
| chr5 | 6849634 | 6849670 | CSAR_peak_ | 12.17,7.27,14- |
| chr5 | 6849692 | 6849744 | CSAR_peak_ | 8.02 -         |
| chr5 | 6849809 | 6849852 | CSAR_peak_ | 7.58 -         |
| chr5 | 6851579 | 6851636 | CSAR_peak_ | 7.27,9.58 -    |
| chr5 | 6851856 | 6851937 | CSAR_peak_ | 8.39,10.83 -   |
| chr5 | 6852388 | 6852438 | CSAR_peak_ | 6.44 -         |
| chr5 | 6853009 | 6853040 | CSAR_peak_ | 9.58 -         |
| chr5 | 6862446 | 6862501 | CSAR_peak_ | 6.21 -         |
| chr5 | 6863931 | 6864005 | CSAR_peak_ | 16.33,7.27 -   |
| chr5 | 6866642 | 6866685 | CSAR_peak_ | 14.88 -        |
| chr5 | 6868115 | 6868165 | CSAR_peak_ | 9.77 -         |
| chr5 | 6883532 | 6883621 | CSAR_peak_ | 6.21 -         |
| chr5 | 6888500 | 6888561 | CSAR_peak_ | 19.36,7.27 -   |
| chr5 | 6888632 | 6888687 | CSAR_peak_ | 8.14,8.2 -     |
| chr5 | 6890816 | 6890869 | CSAR_peak_ | 8.39 -         |
| chr5 | 6927286 | 6927364 | CSAR_peak_ | 9.58 -         |
| chr5 | 6927443 | 6927504 | CSAR_peak_ | 12.13,9.32 -   |
| chr5 | 6927777 | 6927825 | CSAR_peak_ | 7.27,7.27 -    |
| chr5 | 6927916 | 6927987 | CSAR_peak_ | 19.93,6.21 -   |
| chr5 | 6928866 | 6928892 | CSAR_peak_ | 12.13 -        |
| chr5 | 6928991 | 6929049 | CSAR_peak_ | 30.02,17.82 -  |
| chr5 | 6929426 | 6929436 | CSAR_peak_ | 7.27 -         |
| chr5 | 6929546 | 6929629 | CSAR_peak_ | 16.34,8.12 -   |
| chr5 | 6929716 | 6929767 | CSAR_peak_ | 7.26,14.34 -   |
| chr5 | 6929864 | 6929940 | CSAR_peak_ | 6.03,7.27 -    |
| chr5 | 6929941 | 6929982 | CSAR_peak_ | 6.03 -         |
| chr5 | 6930208 | 6930272 | CSAR_peak_ | 8.13 -         |
| chr5 | 6930575 | 6930684 | CSAR_peak_ | 25.73 -        |
| chr5 | 6930741 | 6930852 | CSAR_peak_ | 20.11,17.82 -  |
| chr5 | 6930924 | 6930956 | CSAR_peak_ | 9.72 -         |
| chr5 | 6930964 | 6930986 | CSAR_peak_ | 8.28,7.27 -    |
| chr5 | 6931186 | 6931248 | CSAR_peak_ | 10.31 -        |
| chr5 | 6931601 | 6931667 | CSAR_peak_ | 17.82 -        |
| chr5 | 6931755 | 6931779 | CSAR_peak_ | 12.74 -        |
| chr5 | 6931866 | 6931927 | CSAR_peak_ | 7.27 -         |
| chr5 | 6932077 | 6932164 | CSAR_peak_ | 20.94,9.58 -   |
| chr5 | 6932311 | 6932370 | CSAR_peak_ | 7.92,8.65 -    |
| chr5 | 6932865 | 6932933 | CSAR_peak_ | 16.33 -        |
| chr5 | 6933008 | 6933055 | CSAR_peak_ | 10.83 -        |
| chr5 | 6933080 | 6933129 | CSAR_peak_ | 9.58 -         |

|      |         |         |            |              |   |
|------|---------|---------|------------|--------------|---|
| chr5 | 6933315 | 6933330 | CSAR_peak_ | 11.38        | - |
| chr5 | 6933421 | 6933499 | CSAR_peak_ | 9.41,12.61   | - |
| chr5 | 6934073 | 6934146 | CSAR_peak_ | 7.27,6.21    | - |
| chr5 | 6934399 | 6934411 | CSAR_peak_ | 8.65,7.92    | - |
| chr5 | 6934496 | 6934604 | CSAR_peak_ | 19.09,10.52, | - |
| chr5 | 6934791 | 6934911 | CSAR_peak_ | 9.32         | - |
| chr5 | 6935267 | 6935306 | CSAR_peak_ | 11.14,8.39   | - |
| chr5 | 6935492 | 6935550 | CSAR_peak_ | 14.92,11.38  | - |
| chr5 | 6935558 | 6935576 | CSAR_peak_ | 6.21         | - |
| chr5 | 6935611 | 6935649 | CSAR_peak_ | 16.33        | - |
| chr5 | 6936069 | 6936123 | CSAR_peak_ | 9.58         | - |
| chr5 | 6936415 | 6936564 | CSAR_peak_ | 7.58,9.58    | - |
| chr5 | 6937381 | 6937437 | CSAR_peak_ | 19.36,6.21   | - |
| chr5 | 6937697 | 6937746 | CSAR_peak_ | 6.44,6.21    | - |
| chr5 | 6942824 | 6942874 | CSAR_peak_ | 7.92         | - |
| chr5 | 6943359 | 6943419 | CSAR_peak_ | 13.48        | - |
| chr5 | 6957908 | 6957959 | CSAR_peak_ | 6.22         | - |
| chr5 | 6958086 | 6958169 | CSAR_peak_ | 14.88,6.64   | - |
| chr5 | 6959541 | 6959608 | CSAR_peak_ | 25.91,8.39   | - |
| chr5 | 6959750 | 6959777 | CSAR_peak_ | 6.21         | - |
| chr5 | 6962219 | 6962275 | CSAR_peak_ | 8.39,6.21    | - |
| chr5 | 7006070 | 7006114 | CSAR_peak_ | 8.95         | - |
| chr5 | 7006282 | 7006320 | CSAR_peak_ | 7.58         | - |
| chr5 | 7006413 | 7006455 | CSAR_peak_ | 7.27         | - |
| chr5 | 7006459 | 7006556 | CSAR_peak_ | 17.37        | - |
| chr5 | 7006605 | 7006656 | CSAR_peak_ | 24.21,6.85   | - |
| chr5 | 7006696 | 7006715 | CSAR_peak_ | 7.27         | - |
| chr5 | 7006767 | 7006857 | CSAR_peak_ | 9.32,8.53    | - |
| chr5 | 7018220 | 7018266 | CSAR_peak_ | 6.21         | - |
| chr5 | 7019164 | 7019235 | CSAR_peak_ | 7.58         | - |
| chr5 | 7019613 | 7019663 | CSAR_peak_ | 6.57         | - |
| chr5 | 7020080 | 7020115 | CSAR_peak_ | 6.21         | - |
| chr5 | 7020253 | 7020338 | CSAR_peak_ | 6.21         | - |
| chr5 | 7020435 | 7020479 | CSAR_peak_ | 8.39,6.21    | - |
| chr5 | 7020684 | 7020726 | CSAR_peak_ | 20.94        | - |
| chr5 | 7020830 | 7020855 | CSAR_peak_ | 7.27         | - |
| chr5 | 7040059 | 7040118 | CSAR_peak_ | 9.77         | - |
| chr5 | 7051312 | 7051353 | CSAR_peak_ | 6.21         | - |
| chr5 | 7052470 | 7052524 | CSAR_peak_ | 6.21         | - |
| chr5 | 7053094 | 7053153 | CSAR_peak_ | 6.21         | - |
| chr5 | 7053752 | 7053825 | CSAR_peak_ | 8.39,9.58    | - |
| chr5 | 7061166 | 7061204 | CSAR_peak_ | 8.39,6.21    | - |



|      |         |         |            |                   |   |
|------|---------|---------|------------|-------------------|---|
| chr5 | 7061412 | 7061510 | CSAR_peak_ | 17.82,14.88       | - |
| chr5 | 7061534 | 7061589 | CSAR_peak_ | 6.02              | - |
| chr5 | 7061625 | 7061694 | CSAR_peak_ | 12.13,7.27        | - |
| chr5 | 7061704 | 7061758 | CSAR_peak_ | 13.85             | - |
| chr5 | 7062285 | 7062393 | CSAR_peak_ | 10.94,12.13       | - |
| chr5 | 7062686 | 7062782 | CSAR_peak_ | 14.88,7.27        | - |
| chr5 | 7063217 | 7063294 | CSAR_peak_ | 16.33,14.76       | - |
| chr5 | 7063492 | 7063535 | CSAR_peak_ | 9.58              | - |
| chr5 | 7063886 | 7063995 | CSAR_peak_ | 6.81,6.21,8.3     | - |
| chr5 | 7065233 | 7065287 | CSAR_peak_ | 8.39              | - |
| chr5 | 7065341 | 7065406 | CSAR_peak_ | 13.48             | - |
| chr5 | 7066306 | 7066376 | CSAR_peak_ | 8.28              | - |
| chr5 | 7066503 | 7066555 | CSAR_peak_ | 12.13             | - |
| chr5 | 7066645 | 7066703 | CSAR_peak_ | 8.99,12.72        | - |
| chr5 | 7066938 | 7067015 | CSAR_peak_ | 10.83,7.58        | - |
| chr5 | 7067398 | 7067544 | CSAR_peak_ | 21.24,8.39,10.83  | - |
| chr5 | 7067610 | 7067621 | CSAR_peak_ | 7.27              | - |
| chr5 | 7067852 | 7067894 | CSAR_peak_ | 8.39,16.11        | - |
| chr5 | 7068123 | 7068242 | CSAR_peak_ | 19.36,11.66       | - |
| chr5 | 7068249 | 7068325 | CSAR_peak_ | 7.27,22.56        | - |
| chr5 | 7068471 | 7068524 | CSAR_peak_ | 12.13,19.36       | - |
| chr5 | 7083993 | 7084050 | CSAR_peak_ | 9.58,7.27         | - |
| chr5 | 7084168 | 7084351 | CSAR_peak_ | 14.88,17.82       | - |
| chr5 | 7084355 | 7084406 | CSAR_peak_ | 8.39              | - |
| chr5 | 7084439 | 7084489 | CSAR_peak_ | 6.21              | - |
| chr5 | 7087257 | 7087300 | CSAR_peak_ | 7.27              | - |
| chr5 | 7087821 | 7087907 | CSAR_peak_ | 6.21              | - |
| chr5 | 7087952 | 7088016 | CSAR_peak_ | 14.76             | - |
| chr5 | 7088041 | 7088081 | CSAR_peak_ | 6.21              | - |
| chr5 | 7088089 | 7088152 | CSAR_peak_ | 12.13,6.57        | - |
| chr5 | 7088789 | 7088826 | CSAR_peak_ | 9.58              | - |
| chr5 | 7088986 | 7089038 | CSAR_peak_ | 14.88             | - |
| chr5 | 7089598 | 7089657 | CSAR_peak_ | 8.39              | - |
| chr5 | 7095452 | 7095505 | CSAR_peak_ | 7.27              | - |
| chr5 | 7096077 | 7096132 | CSAR_peak_ | 6.81,7.27         | - |
| chr5 | 7096234 | 7096290 | CSAR_peak_ | 7.27              | - |
| chr5 | 7109854 | 7109903 | CSAR_peak_ | 7.27              | - |
| chr5 | 7125753 | 7125800 | CSAR_peak_ | 9.55,6.87         | - |
| chr5 | 7129398 | 7129448 | CSAR_peak_ | 6.57,7.27         | - |
| chr5 | 7129675 | 7129732 | CSAR_peak_ | 5.86,7.27,13.42   | - |
| chr5 | 7129894 | 7130009 | CSAR_peak_ | 23.42,25.38,10.83 | - |
| chr5 | 7130536 | 7130596 | CSAR_peak_ | 33.47,7.73,3.42   | - |

|      |         |         |            |               |   |
|------|---------|---------|------------|---------------|---|
| chr5 | 7130719 | 7130830 | CSAR_peak_ | 7.27,7.92     | - |
| chr5 | 7130956 | 7131002 | CSAR_peak_ | 6.95,8.39     | - |
| chr5 | 7131074 | 7131116 | CSAR_peak_ | 12.13         | - |
| chr5 | 7131268 | 7131347 | CSAR_peak_ | 18.73,9.27    | - |
| chr5 | 7131693 | 7131775 | CSAR_peak_ | 16.25,21.22   | - |
| chr5 | 7131878 | 7131951 | CSAR_peak_ | 8.18,6.03,9.7 | - |
| chr5 | 7132066 | 7132173 | CSAR_peak_ | 5.86,10.02,1  | - |
| chr5 | 7132299 | 7132384 | CSAR_peak_ | 14.88,6.21    | - |
| chr5 | 7132666 | 7132765 | CSAR_peak_ | 12.13,7.27    | - |
| chr5 | 7132992 | 7133063 | CSAR_peak_ | 6.72,17.37    | - |
| chr5 | 7133209 | 7133260 | CSAR_peak_ | 9.58          | - |
| chr5 | 7133385 | 7133421 | CSAR_peak_ | 7.58,6.1      | - |
| chr5 | 7145064 | 7145124 | CSAR_peak_ | 14.76,7.27    | - |
| chr5 | 7145177 | 7145269 | CSAR_peak_ | 8.28          | - |
| chr5 | 7151122 | 7151180 | CSAR_peak_ | 7.92          | - |
| chr5 | 7151891 | 7151945 | CSAR_peak_ | 8.39          | - |
| chr5 | 7199242 | 7199336 | CSAR_peak_ | 12.13,19.98   | - |
| chr5 | 7199575 | 7199620 | CSAR_peak_ | 12.13         | - |
| chr5 | 7199648 | 7199680 | CSAR_peak_ | 8.39          | - |
| chr5 | 7199791 | 7199842 | CSAR_peak_ | 14.88,6.03    | - |
| chr5 | 7200285 | 7200319 | CSAR_peak_ | 7.27,9.58     | - |
| chr5 | 7200571 | 7200637 | CSAR_peak_ | 8.39          | - |
| chr5 | 7200788 | 7200832 | CSAR_peak_ | 8.39          | - |
| chr5 | 7201002 | 7201011 | CSAR_peak_ | 6.21          | - |
| chr5 | 7201095 | 7201145 | CSAR_peak_ | 6.57,9.58     | - |
| chr5 | 7201311 | 7201440 | CSAR_peak_ | 6.72          | - |
| chr5 | 7201722 | 7201767 | CSAR_peak_ | 7.27          | - |
| chr5 | 7239378 | 7239431 | CSAR_peak_ | 8.39,10.83    | - |
| chr5 | 7240852 | 7240906 | CSAR_peak_ | 12.13         | - |
| chr5 | 7241061 | 7241123 | CSAR_peak_ | 7.27          | - |
| chr5 | 7241642 | 7241690 | CSAR_peak_ | 7.27          | - |
| chr5 | 7241991 | 7242099 | CSAR_peak_ | 6.85,6.03     | - |
| chr5 | 7242348 | 7242447 | CSAR_peak_ | 24.21,17.68   | - |
| chr5 | 7242724 | 7242792 | CSAR_peak_ | 9.58,12.13    | - |
| chr5 | 7242926 | 7243132 | CSAR_peak_ | 20.94,9.58,1  | - |
| chr5 | 7243133 | 7243276 | CSAR_peak_ | 49.16,31.73   | - |
| chr5 | 7243330 | 7243383 | CSAR_peak_ | 6.21          | - |
| chr5 | 7243408 | 7243490 | CSAR_peak_ | 9.58          | - |
| chr5 | 7243681 | 7243759 | CSAR_peak_ | 24.52,12.17   | - |
| chr5 | 7244033 | 7244132 | CSAR_peak_ | 12.13,16.08   | - |
| chr5 | 7244186 | 7244285 | CSAR_peak_ | 12.13         | - |
| chr5 | 7244365 | 7244431 | CSAR_peak_ | 12.13,13.48   | - |

|      |         |         |            |                |   |
|------|---------|---------|------------|----------------|---|
| chr5 | 7244511 | 7244566 | CSAR_peak_ | 9.58,6.21      | - |
| chr5 | 7244803 | 7245086 | CSAR_peak_ | 30.8,9.58,35.  | - |
| chr5 | 7245120 | 7245172 | CSAR_peak_ | 14.88          | - |
| chr5 | 7245271 | 7245340 | CSAR_peak_ | 16.33,12.13    | - |
| chr5 | 7245555 | 7245719 | CSAR_peak_ | 24.21,48.04    | - |
| chr5 | 7245895 | 7245994 | CSAR_peak_ | 23.03,20.18    | - |
| chr5 | 7245997 | 7246128 | CSAR_peak_ | 26.06,18.65    | - |
| chr5 | 7246230 | 7246340 | CSAR_peak_ | 38.71,19.36    | - |
| chr5 | 7246372 | 7246438 | CSAR_peak_ | 7.27           | - |
| chr5 | 7246547 | 7246994 | CSAR_peak_ | 9.58,24.21,6.  | - |
| chr5 | 7247002 | 7247061 | CSAR_peak_ | 7.27           | - |
| chr5 | 7247139 | 7247191 | CSAR_peak_ | 14.88          | - |
| chr5 | 7247222 | 7247357 | CSAR_peak_ | 18.95,12.31    | - |
| chr5 | 7247431 | 7247775 | CSAR_peak_ | 31.2,16.33,5.  | - |
| chr5 | 7247827 | 7248043 | CSAR_peak_ | 50.5,31.51     | - |
| chr5 | 7248054 | 7248174 | CSAR_peak_ | 13.51,37.04    | - |
| chr5 | 7248181 | 7248307 | CSAR_peak_ | 25.18,31.73    | - |
| chr5 | 7248344 | 7248750 | CSAR_peak_ | 58.67,44.86,1- | - |
| chr5 | 7248803 | 7248839 | CSAR_peak_ | 7.27           | - |
| chr5 | 7248878 | 7248995 | CSAR_peak_ | 21.37,22.09    | - |
| chr5 | 7249007 | 7249051 | CSAR_peak_ | 9.58           | - |
| chr5 | 7249086 | 7249162 | CSAR_peak_ | 29.69,26.69    | - |
| chr5 | 7249230 | 7249282 | CSAR_peak_ | 6.44           | - |
| chr5 | 7249337 | 7249545 | CSAR_peak_ | 20.5,25.54     | - |
| chr5 | 7249646 | 7250172 | CSAR_peak_ | 38.07,50.98,(- | - |
| chr5 | 7250262 | 7250393 | CSAR_peak_ | 18.95,19.18    | - |
| chr5 | 7254635 | 7254714 | CSAR_peak_ | 8.39,6.21      | - |
| chr5 | 7281222 | 7281279 | CSAR_peak_ | 8.39           | - |
| chr5 | 7281343 | 7281381 | CSAR_peak_ | 9.58           | - |
| chr5 | 7283162 | 7283240 | CSAR_peak_ | 14.88,5.86,6.  | - |
| chr5 | 7284346 | 7284397 | CSAR_peak_ | 7.27           | - |
| chr5 | 7285013 | 7285062 | CSAR_peak_ | 8.39           | - |
| chr5 | 7285542 | 7285597 | CSAR_peak_ | 14.88          | - |
| chr5 | 7285847 | 7285890 | CSAR_peak_ | 7.27           | - |
| chr5 | 7285998 | 7286050 | CSAR_peak_ | 14.88,7.58     | - |
| chr5 | 7286135 | 7286216 | CSAR_peak_ | 9.58,6.57      | - |
| chr5 | 7290028 | 7290055 | CSAR_peak_ | 6.21           | - |
| chr5 | 7290117 | 7290173 | CSAR_peak_ | 8.39           | - |
| chr5 | 7291366 | 7291439 | CSAR_peak_ | 25.07,24.21    | - |
| chr5 | 7292344 | 7292390 | CSAR_peak_ | 5.86           | - |
| chr5 | 7292921 | 7292964 | CSAR_peak_ | 6.21           | - |
| chr5 | 7293520 | 7293614 | CSAR_peak_ | 8.28,8.95      | - |

|      |         |         |            |                |   |
|------|---------|---------|------------|----------------|---|
| chr5 | 7293871 | 7293911 | CSAR_peak_ | 7.27           | - |
| chr5 | 7294077 | 7294116 | CSAR_peak_ | 7.27           | - |
| chr5 | 7295346 | 7295384 | CSAR_peak_ | 6.21,8.2       | - |
| chr5 | 7297469 | 7297544 | CSAR_peak_ | 13.48,10.83    | - |
| chr5 | 7297780 | 7297862 | CSAR_peak_ | 12.13          | - |
| chr5 | 7311504 | 7311578 | CSAR_peak_ | 10.02          | - |
| chr5 | 7335890 | 7335964 | CSAR_peak_ | 7.27           | - |
| chr5 | 7336241 | 7336295 | CSAR_peak_ | 10.83          | - |
| chr5 | 7336443 | 7336479 | CSAR_peak_ | 9.58           | - |
| chr5 | 7364891 | 7364953 | CSAR_peak_ | 5.62,7.27      | - |
| chr5 | 7365097 | 7365176 | CSAR_peak_ | 14.88          | - |
| chr5 | 7365206 | 7365247 | CSAR_peak_ | 9.58           | - |
| chr5 | 7365629 | 7365872 | CSAR_peak_ | 6.44,7.92,17.- | - |
| chr5 | 7365960 | 7366010 | CSAR_peak_ | 6.85           | - |
| chr5 | 7366282 | 7366324 | CSAR_peak_ | 7.27           | - |
| chr5 | 7366343 | 7366494 | CSAR_peak_ | 27.64          | - |
| chr5 | 7372692 | 7372807 | CSAR_peak_ | 16.33,8.39,8.- | - |
| chr5 | 7374265 | 7374315 | CSAR_peak_ | 14.88          | - |
| chr5 | 7375143 | 7375206 | CSAR_peak_ | 8.39           | - |
| chr5 | 7376638 | 7376690 | CSAR_peak_ | 6.21           | - |
| chr5 | 7397652 | 7397736 | CSAR_peak_ | 17.37,5.95     | - |
| chr5 | 7398199 | 7398259 | CSAR_peak_ | 7.58,12.31     | - |
| chr5 | 7398388 | 7398425 | CSAR_peak_ | 7.27           | - |
| chr5 | 7399639 | 7399687 | CSAR_peak_ | 7.27           | - |
| chr5 | 7436995 | 7437034 | CSAR_peak_ | 7.27           | - |
| chr5 | 7437085 | 7437205 | CSAR_peak_ | 12.13          | - |
| chr5 | 7437360 | 7437404 | CSAR_peak_ | 7.27           | - |
| chr5 | 7437431 | 7437512 | CSAR_peak_ | 17.82          | - |
| chr5 | 7437570 | 7437615 | CSAR_peak_ | 9.58           | - |
| chr5 | 7438006 | 7438119 | CSAR_peak_ | 13.51,7.27,6.- | - |
| chr5 | 7438133 | 7438191 | CSAR_peak_ | 12.13,7.58     | - |
| chr5 | 7438268 | 7438339 | CSAR_peak_ | 7.27           | - |
| chr5 | 7438457 | 7438523 | CSAR_peak_ | 7.27,19.21     | - |
| chr5 | 7438630 | 7438668 | CSAR_peak_ | 7.27           | - |
| chr5 | 7438873 | 7438910 | CSAR_peak_ | 7.27           | - |
| chr5 | 7438958 | 7439041 | CSAR_peak_ | 14.88,6.21     | - |
| chr5 | 7439354 | 7439414 | CSAR_peak_ | 9.58,13.48     | - |
| chr5 | 7439499 | 7439538 | CSAR_peak_ | 7.27           | - |
| chr5 | 7439668 | 7439729 | CSAR_peak_ | 6.57           | - |
| chr5 | 7440066 | 7440144 | CSAR_peak_ | 5.86,7.58,14.- | - |
| chr5 | 7440232 | 7440287 | CSAR_peak_ | 12.13          | - |
| chr5 | 7440452 | 7440539 | CSAR_peak_ | 21.94,8.65     | - |

|      |         |         |            |               |   |
|------|---------|---------|------------|---------------|---|
| chr5 | 7441076 | 7441156 | CSAR_peak_ | 23.95,16.11   | - |
| chr5 | 7441161 | 7441250 | CSAR_peak_ | 14.88         | - |
| chr5 | 7441635 | 7441688 | CSAR_peak_ | 10.83         | - |
| chr5 | 7441744 | 7441833 | CSAR_peak_ | 31.72,20.54   | - |
| chr5 | 7441958 | 7442003 | CSAR_peak_ | 9.58          | - |
| chr5 | 7442257 | 7442498 | CSAR_peak_ | 14.88,25.62,! | - |
| chr5 | 7442726 | 7442779 | CSAR_peak_ | 9.58          | - |
| chr5 | 7442868 | 7442901 | CSAR_peak_ | 7.27          | - |
| chr5 | 7443097 | 7443143 | CSAR_peak_ | 9.58,13.48    | - |
| chr5 | 7453215 | 7453256 | CSAR_peak_ | 8.39          | - |
| chr5 | 7474987 | 7475084 | CSAR_peak_ | 6.21,9.58     | - |
| chr5 | 7475148 | 7475300 | CSAR_peak_ | 9.94,16.33    | - |
| chr5 | 7475645 | 7475701 | CSAR_peak_ | 14.88,19.36   | - |
| chr5 | 7476236 | 7476275 | CSAR_peak_ | 6.21          | - |
| chr5 | 7476298 | 7476375 | CSAR_peak_ | 7.27          | - |
| chr5 | 7476523 | 7476620 | CSAR_peak_ | 9.58,15.96    | - |
| chr5 | 7476745 | 7476799 | CSAR_peak_ | 7.27          | - |
| chr5 | 7477030 | 7477115 | CSAR_peak_ | 14.85,17.82   | - |
| chr5 | 7477164 | 7477197 | CSAR_peak_ | 6.21          | - |
| chr5 | 7477330 | 7477389 | CSAR_peak_ | 25.91,19.36   | - |
| chr5 | 7517995 | 7518046 | CSAR_peak_ | 9.27          | - |
| chr5 | 7518820 | 7518857 | CSAR_peak_ | 6.21          | - |
| chr5 | 7520014 | 7520102 | CSAR_peak_ | 10.31         | - |
| chr5 | 7546977 | 7547030 | CSAR_peak_ | 6.21          | - |
| chr5 | 7547978 | 7548069 | CSAR_peak_ | 8.39,7.92     | - |
| chr5 | 7548075 | 7548121 | CSAR_peak_ | 10.95         | - |
| chr5 | 7579063 | 7579114 | CSAR_peak_ | 7.27          | - |
| chr5 | 7579586 | 7579636 | CSAR_peak_ | 7.27          | - |
| chr5 | 7579732 | 7579816 | CSAR_peak_ | 21.94,9.58    | - |
| chr5 | 7579915 | 7580003 | CSAR_peak_ | 7.27,12.13    | - |
| chr5 | 7580098 | 7580170 | CSAR_peak_ | 12.17,11.14   | - |
| chr5 | 7580330 | 7580377 | CSAR_peak_ | 6.21          | - |
| chr5 | 7580980 | 7581056 | CSAR_peak_ | 8.39          | - |
| chr5 | 7582269 | 7582327 | CSAR_peak_ | 6.57          | - |
| chr5 | 7582475 | 7582525 | CSAR_peak_ | 8.39          | - |
| chr5 | 7582667 | 7582720 | CSAR_peak_ | 10.83         | - |
| chr5 | 7582858 | 7582938 | CSAR_peak_ | 7.27          | - |
| chr5 | 7583429 | 7583495 | CSAR_peak_ | 17.67,17.19   | - |
| chr5 | 7583578 | 7583605 | CSAR_peak_ | 14.59         | - |
| chr5 | 7583826 | 7583871 | CSAR_peak_ | 6.21          | - |
| chr5 | 7584043 | 7584138 | CSAR_peak_ | 6.44,8.2,7.27 | - |
| chr5 | 7584676 | 7584719 | CSAR_peak_ | 7.27          | - |

|      |         |         |            |             |   |
|------|---------|---------|------------|-------------|---|
| chr5 | 7584728 | 7584779 | CSAR_peak_ | 9.97,7.27   | - |
| chr5 | 7584873 | 7584889 | CSAR_peak_ | 10.02       | - |
| chr5 | 7585363 | 7585444 | CSAR_peak_ | 16.33,13.51 | - |
| chr5 | 7585963 | 7586026 | CSAR_peak_ | 7.27        | - |
| chr5 | 7586094 | 7586134 | CSAR_peak_ | 7.27,8.28   | - |
| chr5 | 7586274 | 7586337 | CSAR_peak_ | 15.64,10.94 | - |
| chr5 | 7586550 | 7586648 | CSAR_peak_ | 15.76,7.31  | - |
| chr5 | 7587056 | 7587111 | CSAR_peak_ | 7.27        | - |
| chr5 | 7588005 | 7588048 | CSAR_peak_ | 6.03,15.43  | - |
| chr5 | 7589648 | 7589718 | CSAR_peak_ | 14.76       | - |
| chr5 | 7589860 | 7589900 | CSAR_peak_ | 6.21        | - |
| chr5 | 7590004 | 7590097 | CSAR_peak_ | 20.43,25.91 | - |
| chr5 | 7590354 | 7590432 | CSAR_peak_ | 19.93,22.56 | - |
| chr5 | 7590538 | 7590584 | CSAR_peak_ | 14.88       | - |
| chr5 | 7590696 | 7590749 | CSAR_peak_ | 7.27        | - |
| chr5 | 7592509 | 7592567 | CSAR_peak_ | 6.57        | - |
| chr5 | 7592715 | 7592765 | CSAR_peak_ | 8.39        | - |
| chr5 | 7592907 | 7592960 | CSAR_peak_ | 10.83       | - |
| chr5 | 7593096 | 7593184 | CSAR_peak_ | 10.31       | - |
| chr5 | 7593365 | 7593431 | CSAR_peak_ | 16.11,14.88 | - |
| chr5 | 7593515 | 7593586 | CSAR_peak_ | 7.27,8.52   | - |
| chr5 | 7593845 | 7593895 | CSAR_peak_ | 6.21        | - |
| chr5 | 7594586 | 7594635 | CSAR_peak_ | 6.21        | - |
| chr5 | 7595180 | 7595222 | CSAR_peak_ | 7.27        | - |
| chr5 | 7595383 | 7595432 | CSAR_peak_ | 5.86        | - |
| chr5 | 7595702 | 7595778 | CSAR_peak_ | 12.5        | - |
| chr5 | 7595834 | 7595869 | CSAR_peak_ | 14.76       | - |
| chr5 | 7596018 | 7596080 | CSAR_peak_ | 16.73       | - |
| chr5 | 7596295 | 7596395 | CSAR_peak_ | 8.9,10.13   | - |
| chr5 | 7619042 | 7619097 | CSAR_peak_ | 7.58        | - |
| chr5 | 7623559 | 7623610 | CSAR_peak_ | 6.21        | - |
| chr5 | 7623990 | 7624061 | CSAR_peak_ | 6.21        | - |
| chr5 | 7632043 | 7632098 | CSAR_peak_ | 7.27        | - |
| chr5 | 7633835 | 7633884 | CSAR_peak_ | 9.77        | - |
| chr5 | 7633973 | 7634009 | CSAR_peak_ | 6.85        | - |
| chr5 | 7634112 | 7634193 | CSAR_peak_ | 7.27        | - |
| chr5 | 7634529 | 7634591 | CSAR_peak_ | 9.58,10.83  | - |
| chr5 | 7635241 | 7635327 | CSAR_peak_ | 7.27        | - |
| chr5 | 7729713 | 7729785 | CSAR_peak_ | 7.27,9.58   | - |
| chr5 | 7729865 | 7729914 | CSAR_peak_ | 8.39        | - |
| chr5 | 7730185 | 7730236 | CSAR_peak_ | 7.27        | - |
| chr5 | 7731700 | 7731791 | CSAR_peak_ | 8.39,7.27   | - |

|      |         |         |            |                |   |
|------|---------|---------|------------|----------------|---|
| chr5 | 7731850 | 7731913 | CSAR_peak_ | 20.43,8.09     | - |
| chr5 | 7732009 | 7732071 | CSAR_peak_ | 10.33          | - |
| chr5 | 7732524 | 7732592 | CSAR_peak_ | 18.95,12.13    | - |
| chr5 | 7732852 | 7732933 | CSAR_peak_ | 12.17,22.56    | - |
| chr5 | 7733226 | 7733380 | CSAR_peak_ | 17.37,8.02     | - |
| chr5 | 7733713 | 7733790 | CSAR_peak_ | 34.84,9.13     | - |
| chr5 | 7733865 | 7733959 | CSAR_peak_ | 9.58           | - |
| chr5 | 7734591 | 7734638 | CSAR_peak_ | 7.58,20.94     | - |
| chr5 | 7734671 | 7734706 | CSAR_peak_ | 6.21           | - |
| chr5 | 7735149 | 7735220 | CSAR_peak_ | 13.44,10.17    | - |
| chr5 | 7737723 | 7737768 | CSAR_peak_ | 6.21           | - |
| chr5 | 7746193 | 7746237 | CSAR_peak_ | 6.21           | - |
| chr5 | 7858969 | 7859019 | CSAR_peak_ | 7.27           | - |
| chr5 | 7872606 | 7872660 | CSAR_peak_ | 6.21           | - |
| chr5 | 7874220 | 7874240 | CSAR_peak_ | 6.21           | - |
| chr5 | 7874339 | 7874421 | CSAR_peak_ | 7.27           | - |
| chr5 | 7883137 | 7883198 | CSAR_peak_ | 6.81           | - |
| chr5 | 7883966 | 7884021 | CSAR_peak_ | 6.21           | - |
| chr5 | 7885788 | 7885923 | CSAR_peak_ | 17.82,17.37    | - |
| chr5 | 7885933 | 7885981 | CSAR_peak_ | 7.27           | - |
| chr5 | 7886456 | 7886725 | CSAR_peak_ | 17.52,21.22    | - |
| chr5 | 7887293 | 7887399 | CSAR_peak_ | 7.27,13.85     | - |
| chr5 | 7887469 | 7887566 | CSAR_peak_ | 17.82,14.88    | - |
| chr5 | 7887681 | 7887784 | CSAR_peak_ | 17.35,10.31    | - |
| chr5 | 7888071 | 7888213 | CSAR_peak_ | 14.08,8.13     | - |
| chr5 | 7888553 | 7888695 | CSAR_peak_ | 12.13,14.88    | - |
| chr5 | 7888717 | 7888917 | CSAR_peak_ | 13.51,9.77,8.- | - |
| chr5 | 7888959 | 7889032 | CSAR_peak_ | 13.66,9.41     | - |
| chr5 | 7889138 | 7889241 | CSAR_peak_ | 9.61,8.28,8.5- | - |
| chr5 | 7889266 | 7889329 | CSAR_peak_ | 6.95,6.87,7.2- | - |
| chr5 | 7889485 | 7889708 | CSAR_peak_ | 10.94,16.78,-  | - |
| chr5 | 7889760 | 7889843 | CSAR_peak_ | 16.33,17.37    | - |
| chr5 | 7890003 | 7890060 | CSAR_peak_ | 12.17          | - |
| chr5 | 7890068 | 7890143 | CSAR_peak_ | 10.52,15.2     | - |
| chr5 | 7890241 | 7890350 | CSAR_peak_ | 14.34,16.33    | - |
| chr5 | 7891362 | 7891459 | CSAR_peak_ | 9.77,16.25     | - |
| chr5 | 7896225 | 7896314 | CSAR_peak_ | 7.27           | - |
| chr5 | 7897706 | 7897773 | CSAR_peak_ | 8.65           | - |
| chr5 | 7899171 | 7899289 | CSAR_peak_ | 7.27,9.77      | - |
| chr5 | 7904672 | 7904733 | CSAR_peak_ | 34.89,7.27     | - |
| chr5 | 7904981 | 7905026 | CSAR_peak_ | 6.03,10.31     | - |
| chr5 | 7905039 | 7905207 | CSAR_peak_ | 13.48,17.82,-  | - |

|      |         |         |            |                   |   |
|------|---------|---------|------------|-------------------|---|
| chr5 | 7905333 | 7905390 | CSAR_peak_ | 14.88             | - |
| chr5 | 7905430 | 7905468 | CSAR_peak_ | 6.21              | - |
| chr5 | 7905539 | 7905690 | CSAR_peak_ | 8.39,14.76,14.76  | - |
| chr5 | 7905788 | 7905827 | CSAR_peak_ | 6.21              | - |
| chr5 | 7905883 | 7906028 | CSAR_peak_ | 19.36,17.4        | - |
| chr5 | 7906066 | 7906194 | CSAR_peak_ | 6.21,7.27         | - |
| chr5 | 7906217 | 7906273 | CSAR_peak_ | 14.88             | - |
| chr5 | 7906827 | 7906891 | CSAR_peak_ | 14.88,9.58        | - |
| chr5 | 7907052 | 7907159 | CSAR_peak_ | 12.27,17.82       | - |
| chr5 | 7907819 | 7907862 | CSAR_peak_ | 7.27              | - |
| chr5 | 7908061 | 7908155 | CSAR_peak_ | 9.58,22.56        | - |
| chr5 | 7908269 | 7908323 | CSAR_peak_ | 7.27              | - |
| chr5 | 7908490 | 7908590 | CSAR_peak_ | 23.03,19.36       | - |
| chr5 | 7908634 | 7908750 | CSAR_peak_ | 9.58,6.21         | - |
| chr5 | 7908929 | 7909034 | CSAR_peak_ | 8.39,9.58         | - |
| chr5 | 7955828 | 7955874 | CSAR_peak_ | 8.65              | - |
| chr5 | 7956626 | 7956703 | CSAR_peak_ | 12.13,7.27        | - |
| chr5 | 7956997 | 7957059 | CSAR_peak_ | 12.13,12.13       | - |
| chr5 | 7957179 | 7957250 | CSAR_peak_ | 14.76,6.21        | - |
| chr5 | 7957461 | 7957518 | CSAR_peak_ | 10.83,7.58        | - |
| chr5 | 7957626 | 7957682 | CSAR_peak_ | 16.33             | - |
| chr5 | 7957691 | 7957771 | CSAR_peak_ | 6.57              | - |
| chr5 | 7958106 | 7958135 | CSAR_peak_ | 9.58              | - |
| chr5 | 7958218 | 7958252 | CSAR_peak_ | 9.77,12.13        | - |
| chr5 | 7958434 | 7958577 | CSAR_peak_ | 19.36,8.14,20.13  | - |
| chr5 | 7958679 | 7958763 | CSAR_peak_ | 24.21,10.82,10.82 | - |
| chr5 | 7958842 | 7958881 | CSAR_peak_ | 13.48             | - |
| chr5 | 7959126 | 7959231 | CSAR_peak_ | 7.27              | - |
| chr5 | 7959296 | 7959386 | CSAR_peak_ | 16.33             | - |
| chr5 | 7959471 | 7959510 | CSAR_peak_ | 10.31,17.82       | - |
| chr5 | 7959551 | 7959754 | CSAR_peak_ | 6.95,24.21        | - |
| chr5 | 7960750 | 7960805 | CSAR_peak_ | 7.58              | - |
| chr5 | 7961145 | 7961198 | CSAR_peak_ | 6.57              | - |
| chr5 | 7961587 | 7961657 | CSAR_peak_ | 8.95,6.21         | - |
| chr5 | 7961710 | 7961808 | CSAR_peak_ | 7.27,7.27         | - |
| chr5 | 7961813 | 7961830 | CSAR_peak_ | 20.13             | - |
| chr5 | 7961924 | 7962002 | CSAR_peak_ | 19.98,8.5,13.48   | - |
| chr5 | 7962193 | 7962265 | CSAR_peak_ | 8.65,8.39         | - |
| chr5 | 7962537 | 7962547 | CSAR_peak_ | 8.95              | - |
| chr5 | 7962557 | 7962607 | CSAR_peak_ | 6.1               | - |
| chr5 | 7963154 | 7963231 | CSAR_peak_ | 10.95,6.03,6.03   | - |
| chr5 | 7963551 | 7963635 | CSAR_peak_ | 14.88,10.83       | - |



|      |         |         |             |               |   |
|------|---------|---------|-------------|---------------|---|
| chr5 | 7963766 | 7963855 | CSAR_peak_  | 8.61          | - |
| chr5 | 7964016 | 7964109 | CSAR_peak_  | 20.35,9.72    | - |
| chr5 | 7964418 | 7964518 | CSAR_peak_  | 14.92,11.74   | - |
| chr5 | 7964530 | 7964551 | CSAR_peak_  | 8.3           | - |
| chr5 | 7964590 | 7964673 | CSAR_peak_  | 8.52,5.62,7.4 | - |
| chr5 | 7964825 | 7964863 | CSAR_peak_! | 5.86          | - |
| chr5 | 7965144 | 7965173 | CSAR_peak_  | 10.94         | - |
| chr5 | 7965248 | 7965340 | CSAR_peak_  | 19.98,6.44    | - |
| chr5 | 7965442 | 7965499 | CSAR_peak_  | 14.88,6.95    | - |
| chr5 | 7965894 | 7965989 | CSAR_peak_  | 16.33,12.13   | - |
| chr5 | 7966260 | 7966309 | CSAR_peak_  | 6.44          | - |
| chr5 | 7966404 | 7966446 | CSAR_peak_  | 7.27          | - |
| chr5 | 7966876 | 7966917 | CSAR_peak_  | 13.48         | - |
| chr5 | 7967200 | 7967243 | CSAR_peak_  | 7.27          | - |
| chr5 | 7967396 | 7967445 | CSAR_peak_  | 6.21,8.39     | - |
| chr5 | 7967511 | 7967580 | CSAR_peak_  | 7.27          | - |
| chr5 | 7971925 | 7972003 | CSAR_peak_  | 17.82         | - |
| chr5 | 7972062 | 7972164 | CSAR_peak_  | 9.61,14.88    | - |
| chr5 | 7972964 | 7973037 | CSAR_peak_  | 9.58          | - |
| chr5 | 7985577 | 7985609 | CSAR_peak_  | 7.27          | - |
| chr5 | 7985935 | 7985983 | CSAR_peak_! | 5.86          | - |
| chr5 | 7985986 | 7986058 | CSAR_peak_  | 9.77,6.21     | - |
| chr5 | 8046780 | 8046828 | CSAR_peak_  | 8.39          | - |
| chr5 | 8047284 | 8047328 | CSAR_peak_  | 12.13         | - |
| chr5 | 8047929 | 8048012 | CSAR_peak_  | 8.39,9.58     | - |
| chr5 | 8073948 | 8073999 | CSAR_peak_  | 8.39,11.38    | - |
| chr5 | 8111088 | 8111137 | CSAR_peak_  | 10.83         | - |
| chr5 | 8113995 | 8114035 | CSAR_peak_  | 7.27          | - |
| chr5 | 8114170 | 8114222 | CSAR_peak_  | 9.58          | - |
| chr5 | 8114645 | 8114723 | CSAR_peak_  | 7.27          | - |
| chr5 | 8114822 | 8114895 | CSAR_peak_  | 7.27          | - |
| chr5 | 8117853 | 8117970 | CSAR_peak_  | 27.64,31.73   | - |
| chr5 | 8117974 | 8118020 | CSAR_peak_  | 9.58          | - |
| chr5 | 8118136 | 8118221 | CSAR_peak_  | 12.13,9.77    | - |
| chr5 | 8118630 | 8118802 | CSAR_peak_  | 17.37,24.21,  | - |
| chr5 | 8118977 | 8119010 | CSAR_peak_  | 13.48         | - |
| chr5 | 8119090 | 8119127 | CSAR_peak_  | 9.77,8.39     | - |
| chr5 | 8119211 | 8119222 | CSAR_peak_  | 7.27          | - |
| chr5 | 8119348 | 8119407 | CSAR_peak_  | 10.83         | - |
| chr5 | 8119449 | 8119505 | CSAR_peak_  | 17.82         | - |
| chr5 | 8119518 | 8119579 | CSAR_peak_  | 7.58          | - |
| chr5 | 8119940 | 8119982 | CSAR_peak_  | 10.83         | - |

|      |         |         |            |               |   |
|------|---------|---------|------------|---------------|---|
| chr5 | 8120168 | 8120402 | CSAR_peak_ | 19.36,39.3,1  | - |
| chr5 | 8120518 | 8120576 | CSAR_peak_ | 7.27          | - |
| chr5 | 8121622 | 8121666 | CSAR_peak_ | 7.27          | - |
| chr5 | 8122147 | 8122248 | CSAR_peak_ | 17.82,9.58    | - |
| chr5 | 8131569 | 8131639 | CSAR_peak_ | 8.14          | - |
| chr5 | 8264632 | 8264725 | CSAR_peak_ | 9.58          | - |
| chr5 | 8264816 | 8265012 | CSAR_peak_ | 6.21,23.8,17  | - |
| chr5 | 8265393 | 8265426 | CSAR_peak_ | 7.27,7,6.21   | - |
| chr5 | 8265524 | 8265578 | CSAR_peak_ | 10.83         | - |
| chr5 | 8285611 | 8285667 | CSAR_peak_ | 10.83,7.27    | - |
| chr5 | 8285836 | 8285860 | CSAR_peak_ | 6.21          | - |
| chr5 | 8286220 | 8286323 | CSAR_peak_ | 10.83,9.58    | - |
| chr5 | 8286671 | 8286758 | CSAR_peak_ | 17.4,6.21     | - |
| chr5 | 8286985 | 8287038 | CSAR_peak_ | 5.86          | - |
| chr5 | 8287127 | 8287189 | CSAR_peak_ | 8.39,9.58     | - |
| chr5 | 8287490 | 8287541 | CSAR_peak_ | 6.21          | - |
| chr5 | 8338841 | 8338877 | CSAR_peak_ | 6.21          | - |
| chr5 | 8338925 | 8339006 | CSAR_peak_ | 7.27,6.21     | - |
| chr5 | 8339451 | 8339500 | CSAR_peak_ | 6.21          | - |
| chr5 | 8339632 | 8339794 | CSAR_peak_ | 12.13,11.96,  | - |
| chr5 | 8340197 | 8340231 | CSAR_peak_ | 7.27          | - |
| chr5 | 8341035 | 8341106 | CSAR_peak_ | 16.33         | - |
| chr5 | 8341121 | 8341174 | CSAR_peak_ | 6.21          | - |
| chr5 | 8341550 | 8341616 | CSAR_peak_ | 7.27,10.83    | - |
| chr5 | 8341720 | 8341756 | CSAR_peak_ | 12.31,9.77    | - |
| chr5 | 8341801 | 8341829 | CSAR_peak_ | 11.63         | - |
| chr5 | 8341952 | 8341972 | CSAR_peak_ | 10.52         | - |
| chr5 | 8342081 | 8342138 | CSAR_peak_ | 8.39          | - |
| chr5 | 8342376 | 8342453 | CSAR_peak_ | 14.88,13.48   | - |
| chr5 | 8353792 | 8353836 | CSAR_peak_ | 7.27          | - |
| chr5 | 8354663 | 8354793 | CSAR_peak_ | 27.73,11.96   | - |
| chr5 | 8354801 | 8354893 | CSAR_peak_ | 7.68,6.64,9.6 | - |
| chr5 | 8354906 | 8354920 | CSAR_peak_ | 6.87          | - |
| chr5 | 8354925 | 8355089 | CSAR_peak_ | 19.93,19.15   | - |
| chr5 | 8355098 | 8355264 | CSAR_peak_ | 14.88,9.58,5  | - |
| chr5 | 8355317 | 8355423 | CSAR_peak_ | 9.77          | - |
| chr5 | 8355508 | 8355552 | CSAR_peak_ | 9.58          | - |
| chr5 | 8355631 | 8355780 | CSAR_peak_ | 20.43,24.21   | - |
| chr5 | 8355802 | 8356165 | CSAR_peak_ | 48.68,52.7,6  | - |
| chr5 | 8356192 | 8357060 | CSAR_peak_ | 68.02,9.89,8  | - |
| chr5 | 8357089 | 8357477 | CSAR_peak_ | 24.52,38.93,  | - |
| chr5 | 8357502 | 8358425 | CSAR_peak_ | 60.75,26.32,  | - |

|      |         |         |            |               |   |
|------|---------|---------|------------|---------------|---|
| chr5 | 8358446 | 8358603 | CSAR_peak_ | 34.89,23.42   | - |
| chr5 | 8366800 | 8366857 | CSAR_peak_ | 6.21          | - |
| chr5 | 8367646 | 8367696 | CSAR_peak_ | 7.27          | - |
| chr5 | 8369302 | 8369349 | CSAR_peak_ | 5.86          | - |
| chr5 | 8369594 | 8369649 | CSAR_peak_ | 14.88,6.03    | - |
| chr5 | 8369835 | 8369913 | CSAR_peak_ | 17.82,9.58    | - |
| chr5 | 8370926 | 8371001 | CSAR_peak_ | 7.27          | - |
| chr5 | 8371155 | 8371246 | CSAR_peak_ | 9.58,14.88    | - |
| chr5 | 8371604 | 8371656 | CSAR_peak_ | 7.27          | - |
| chr5 | 8371707 | 8371836 | CSAR_peak_ | 22.56,7.58,6. | - |
| chr5 | 8372228 | 8372297 | CSAR_peak_ | 7.27,6.03     | - |
| chr5 | 8416611 | 8416667 | CSAR_peak_ | 20.94,14.85   | - |
| chr5 | 8416682 | 8416731 | CSAR_peak_ | 12.17         | - |
| chr5 | 8416741 | 8416834 | CSAR_peak_ | 17.82,9.03    | - |
| chr5 | 8416836 | 8416887 | CSAR_peak_ | 9.58          | - |
| chr5 | 8416989 | 8417120 | CSAR_peak_ | 6.71,36.88,1. | - |
| chr5 | 8417179 | 8417367 | CSAR_peak_ | 25.62,31.2,1. | - |
| chr5 | 8417426 | 8417481 | CSAR_peak_ | 10.83,7.92    | - |
| chr5 | 8417591 | 8417643 | CSAR_peak_ | 40.66,12.13   | - |
| chr5 | 8417723 | 8417810 | CSAR_peak_ | 10.31,24.21   | - |
| chr5 | 8417834 | 8418000 | CSAR_peak_ | 8.54,19.98,8. | - |
| chr5 | 8418023 | 8418463 | CSAR_peak_ | 51.24,9.27,4. | - |
| chr5 | 8418527 | 8418637 | CSAR_peak_ | 46.01,45.25   | - |
| chr5 | 8418643 | 8418733 | CSAR_peak_ | 14.88,7.27    | - |
| chr5 | 8456002 | 8456060 | CSAR_peak_ | 7.27          | - |
| chr5 | 8458171 | 8458250 | CSAR_peak_ | 17.82,8.39    | - |
| chr5 | 8458888 | 8458925 | CSAR_peak_ | 6.21          | - |
| chr5 | 8459184 | 8459320 | CSAR_peak_ | 10.31,12.13   | - |
| chr5 | 8459859 | 8459921 | CSAR_peak_ | 12.13,9.58    | - |
| chr5 | 8460948 | 8461066 | CSAR_peak_ | 6.03,14.73    | - |
| chr5 | 8461132 | 8461185 | CSAR_peak_ | 11.96,25.91   | - |
| chr5 | 8463053 | 8463096 | CSAR_peak_ | 6.21,7.27     | - |
| chr5 | 8463139 | 8463200 | CSAR_peak_ | 12.17         | - |
| chr5 | 8463526 | 8463586 | CSAR_peak_ | 14.88,9.58    | - |
| chr5 | 8463995 | 8464069 | CSAR_peak_ | 14.88         | - |
| chr5 | 8464174 | 8464204 | CSAR_peak_ | 6.21          | - |
| chr5 | 8465241 | 8465285 | CSAR_peak_ | 7.92,10.33    | - |
| chr5 | 8465366 | 8465425 | CSAR_peak_ | 18.95,13      | - |
| chr5 | 8465476 | 8465495 | CSAR_peak_ | 10.18         | - |
| chr5 | 8465880 | 8465928 | CSAR_peak_ | 12.17,10.62   | - |
| chr5 | 8466608 | 8466632 | CSAR_peak_ | 8.65          | - |
| chr5 | 8466744 | 8466774 | CSAR_peak_ | 6.21          | - |

|      |         |         |            |               |   |
|------|---------|---------|------------|---------------|---|
| chr5 | 8467173 | 8467259 | CSAR_peak_ | 12.31         | - |
| chr5 | 8467490 | 8467538 | CSAR_peak_ | 14.88,9.58    | - |
| chr5 | 8467619 | 8467704 | CSAR_peak_ | 12.31,10.83,  | - |
| chr5 | 8467789 | 8467947 | CSAR_peak_ | 10.83,13.48,  | - |
| chr5 | 8468021 | 8468058 | CSAR_peak_ | 6.21          | - |
| chr5 | 8468552 | 8468681 | CSAR_peak_ | 5.86,6.21,8.3 | - |
| chr5 | 8470234 | 8470288 | CSAR_peak_ | 9.58,7.27     | - |
| chr5 | 8470514 | 8470566 | CSAR_peak_ | 9.58          | - |
| chr5 | 8472448 | 8472517 | CSAR_peak_ | 14.88,12.31   | - |
| chr5 | 8473138 | 8473187 | CSAR_peak_ | 7.27          | - |
| chr5 | 8474462 | 8474515 | CSAR_peak_ | 24.21         | - |
| chr5 | 8475201 | 8475323 | CSAR_peak_ | 12.74,6.21    | - |
| chr5 | 8477929 | 8477985 | CSAR_peak_ | 13.48         | - |
| chr5 | 8479505 | 8479601 | CSAR_peak_ | 8.65,7.27     | - |
| chr5 | 8479831 | 8479890 | CSAR_peak_ | 7.27          | - |
| chr5 | 8485232 | 8485246 | CSAR_peak_ | 7.58          | - |
| chr5 | 8486509 | 8486529 | CSAR_peak_ | 10.83,12.13   | - |
| chr5 | 8486736 | 8486788 | CSAR_peak_ | 24.21,8.28    | - |
| chr5 | 8486799 | 8486842 | CSAR_peak_ | 8.39          | - |
| chr5 | 8487022 | 8487064 | CSAR_peak_ | 7.27          | - |
| chr5 | 8489098 | 8489141 | CSAR_peak_ | 7.27          | - |
| chr5 | 8501493 | 8501548 | CSAR_peak_ | 14.88         | - |
| chr5 | 8507869 | 8507993 | CSAR_peak_ | 14.88,9.77    | - |
| chr5 | 8508053 | 8508189 | CSAR_peak_ | 14.76,10.02,  | - |
| chr5 | 8508209 | 8508280 | CSAR_peak_ | 12.13         | - |
| chr5 | 8508532 | 8508606 | CSAR_peak_ | 6.57          | - |
| chr5 | 8516509 | 8516565 | CSAR_peak_ | 10.83         | - |
| chr5 | 8516914 | 8516970 | CSAR_peak_ | 9.27          | - |
| chr5 | 8517033 | 8517086 | CSAR_peak_ | 12.13         | - |
| chr5 | 8517318 | 8517377 | CSAR_peak_ | 9.58          | - |
| chr5 | 8517554 | 8517617 | CSAR_peak_ | 7.27          | - |
| chr5 | 8517709 | 8517767 | CSAR_peak_ | 6.21          | - |
| chr5 | 8517867 | 8517917 | CSAR_peak_ | 8.39,24.52    | - |
| chr5 | 8517949 | 8517961 | CSAR_peak_ | 5.86          | - |
| chr5 | 8518073 | 8518125 | CSAR_peak_ | 14.76         | - |
| chr5 | 8518127 | 8518219 | CSAR_peak_ | 12.13,6.44    | - |
| chr5 | 8518342 | 8518423 | CSAR_peak_ | 7.92,17.82,9. | - |
| chr5 | 8518591 | 8518644 | CSAR_peak_ | 12.5,8.13     | - |
| chr5 | 8518646 | 8518749 | CSAR_peak_ | 9.58,6.21,9.2 | - |
| chr5 | 8518834 | 8519000 | CSAR_peak_ | 14.08,5.67,1. | - |
| chr5 | 8519044 | 8519088 | CSAR_peak_ | 10.96,13.51   | - |
| chr5 | 8519361 | 8519453 | CSAR_peak_ | 20.13,10.7    | - |

|      |         |         |            |               |   |
|------|---------|---------|------------|---------------|---|
| chr5 | 8520749 | 8520825 | CSAR_peak_ | 17.82         | - |
| chr5 | 8520920 | 8520980 | CSAR_peak_ | 10.02,7.27    | - |
| chr5 | 8521224 | 8521292 | CSAR_peak_ | 20.43         | - |
| chr5 | 8521296 | 8521351 | CSAR_peak_ | 13.51,25.07   | - |
| chr5 | 8521462 | 8521490 | CSAR_peak_ | 12.74         | - |
| chr5 | 8521515 | 8521552 | CSAR_peak_ | 10.62         | - |
| chr5 | 8521587 | 8521748 | CSAR_peak_ | 39.3,6.54,16. | - |
| chr5 | 8521914 | 8521947 | CSAR_peak_ | 9.77          | - |
| chr5 | 8522040 | 8522142 | CSAR_peak_ | 16.19         | - |
| chr5 | 8522234 | 8522249 | CSAR_peak_ | 14.88         | - |
| chr5 | 8558012 | 8558093 | CSAR_peak_ | 9.58          | - |
| chr5 | 8558561 | 8558587 | CSAR_peak_ | 9.58          | - |
| chr5 | 8558641 | 8558688 | CSAR_peak_ | 13.48,9.61    | - |
| chr5 | 8558717 | 8558760 | CSAR_peak_ | 6.21,6.1      | - |
| chr5 | 8559225 | 8559274 | CSAR_peak_ | 10.83         | - |
| chr5 | 8634277 | 8634341 | CSAR_peak_ | 6.03,6.22     | - |
| chr5 | 8634453 | 8634509 | CSAR_peak_ | 10.31,9.77    | - |
| chr5 | 8634670 | 8634742 | CSAR_peak_ | 12.13         | - |
| chr5 | 8634808 | 8634834 | CSAR_peak_ | 17.82         | - |
| chr5 | 8635303 | 8635379 | CSAR_peak_ | 14.88,27.64   | - |
| chr5 | 8635418 | 8635468 | CSAR_peak_ | 8.39          | - |
| chr5 | 8636612 | 8636631 | CSAR_peak_ | 8.39          | - |
| chr5 | 8636736 | 8636806 | CSAR_peak_ | 26.69         | - |
| chr5 | 8636924 | 8636971 | CSAR_peak_ | 6.21          | - |
| chr5 | 8637934 | 8637962 | CSAR_peak_ | 8.39          | - |
| chr5 | 8638006 | 8638047 | CSAR_peak_ | 11.38,12.13   | - |
| chr5 | 8638395 | 8638443 | CSAR_peak_ | 13.51         | - |
| chr5 | 8638891 | 8638942 | CSAR_peak_ | 8.39,8.13     | - |
| chr5 | 8639668 | 8639746 | CSAR_peak_ | 20.94         | - |
| chr5 | 8649869 | 8649934 | CSAR_peak_ | 12.17,12.13   | - |
| chr5 | 8650450 | 8650524 | CSAR_peak_ | 12.31,9.58    | - |
| chr5 | 8658215 | 8658265 | CSAR_peak_ | 8.39          | - |
| chr5 | 8755021 | 8755121 | CSAR_peak_ | 14.92,14.34   | - |
| chr5 | 8755251 | 8755317 | CSAR_peak_ | 12.17         | - |
| chr5 | 8755853 | 8755928 | CSAR_peak_ | 7.34,12.17    | - |
| chr5 | 8756007 | 8756053 | CSAR_peak_ | 10.83         | - |
| chr5 | 8756185 | 8756261 | CSAR_peak_ | 10.83,7.27    | - |
| chr5 | 8756562 | 8756617 | CSAR_peak_ | 12.17,6.02    | - |
| chr5 | 8756620 | 8756704 | CSAR_peak_ | 13.51         | - |
| chr5 | 8757241 | 8757351 | CSAR_peak_ | 17.82         | - |
| chr5 | 8757492 | 8757532 | CSAR_peak_ | 8.39          | - |
| chr5 | 8757883 | 8757918 | CSAR_peak_ | 8.39          | - |

|      |         |         |             |                |
|------|---------|---------|-------------|----------------|
| chr5 | 8757947 | 8758050 | CSAR_peak_! | 5.86,14.88,9.- |
| chr5 | 8758076 | 8758180 | CSAR_peak_! | 7.27,10.31 -   |
| chr5 | 8758261 | 8758324 | CSAR_peak_! | 8.95,15.68,9.- |
| chr5 | 8758372 | 8758466 | CSAR_peak_! | 12.17,15.2 -   |
| chr5 | 8758507 | 8758599 | CSAR_peak_! | 20.43,7.92 -   |
| chr5 | 8758825 | 8758905 | CSAR_peak_! | 18.95,14.22 -  |
| chr5 | 8759046 | 8759113 | CSAR_peak_! | 9.47,6.1 -     |
| chr5 | 8759254 | 8759311 | CSAR_peak_! | 12.74,8.65 -   |
| chr5 | 8759333 | 8759407 | CSAR_peak_! | 9.77 -         |
| chr5 | 8759489 | 8759533 | CSAR_peak_! | 21.37 -        |
| chr5 | 8759670 | 8759784 | CSAR_peak_! | 24.15 -        |
| chr5 | 8760191 | 8760337 | CSAR_peak_! | 25.91,9.55,7.- |
| chr5 | 8760492 | 8760506 | CSAR_peak_! | 6.21 -         |
| chr5 | 8760589 | 8760643 | CSAR_peak_! | 11.75,16.25 -  |
| chr5 | 8760792 | 8760853 | CSAR_peak_! | 10.83,7.27 -   |
| chr5 | 8760996 | 8761077 | CSAR_peak_! | 12.13,7.27 -   |
| chr5 | 8761099 | 8761110 | CSAR_peak_! | 6.21 -         |
| chr5 | 8761257 | 8761329 | CSAR_peak_! | 20.35 -        |
| chr5 | 8761518 | 8761604 | CSAR_peak_! | 13.29,7.26 -   |
| chr5 | 8761883 | 8762011 | CSAR_peak_! | 13.48,44.49 -  |
| chr5 | 8794863 | 8794925 | CSAR_peak_! | 6.44 -         |
| chr5 | 8794927 | 8795085 | CSAR_peak_! | 24.21,7.27 -   |
| chr5 | 8795112 | 8795199 | CSAR_peak_! | 21.22 -        |
| chr5 | 8795220 | 8795363 | CSAR_peak_! | 31.2,17.82 -   |
| chr5 | 8795607 | 8795849 | CSAR_peak_! | 16,14.76,11.4- |
| chr5 | 8795923 | 8795990 | CSAR_peak_! | 12.13 -        |
| chr5 | 8796028 | 8796250 | CSAR_peak_! | 25.1,51.72,14- |
| chr5 | 8796259 | 8796627 | CSAR_peak_! | 11.34,16.36,-  |
| chr5 | 8796635 | 8796898 | CSAR_peak_! | 9.77,7.92,11.- |
| chr5 | 8799972 | 8800007 | CSAR_peak_! | 8.39 -         |
| chr5 | 8800820 | 8800870 | CSAR_peak_! | 7.27 -         |
| chr5 | 8801587 | 8801705 | CSAR_peak_! | 18.61,14.99 -  |
| chr5 | 8802528 | 8802581 | CSAR_peak_! | 6.57 -         |
| chr5 | 8855023 | 8855139 | CSAR_peak_! | 9.58 -         |
| chr5 | 8855214 | 8855256 | CSAR_peak_! | 9.77 -         |
| chr5 | 8855365 | 8855414 | CSAR_peak_! | 6.21 -         |
| chr5 | 8856170 | 8856285 | CSAR_peak_! | 7.27,6.21 -    |
| chr5 | 8891836 | 8891931 | CSAR_peak_! | 6.21,13.48 -   |
| chr5 | 8891982 | 8892046 | CSAR_peak_! | 16.33,12.17 -  |
| chr5 | 8892083 | 8892105 | CSAR_peak_! | 6.95 -         |
| chr5 | 8892139 | 8892226 | CSAR_peak_! | 16.11,7.27 -   |
| chr5 | 8915445 | 8915513 | CSAR_peak_! | 5.86 -         |

|      |         |         |             |                |
|------|---------|---------|-------------|----------------|
| chr5 | 8915529 | 8915695 | CSAR_peak_  | 24.52,12.31,-  |
| chr5 | 8915821 | 8915899 | CSAR_peak_  | 9.58,7.27 -    |
| chr5 | 8915966 | 8916053 | CSAR_peak_  | 12.55,9.41 -   |
| chr5 | 8916496 | 8916547 | CSAR_peak_  | 12.13 -        |
| chr5 | 8916640 | 8916657 | CSAR_peak_  | 9.58 -         |
| chr5 | 8958836 | 8958978 | CSAR_peak_  | 6.21,13.48,5.- |
| chr5 | 8960852 | 8960910 | CSAR_peak_  | 7.27 -         |
| chr5 | 8963242 | 8963324 | CSAR_peak_  | 6.81,5.86 -    |
| chr5 | 8969370 | 8969410 | CSAR_peak_  | 8.39 -         |
| chr5 | 8969511 | 8969589 | CSAR_peak_  | 6.21 -         |
| chr5 | 8969773 | 8969820 | CSAR_peak_  | 16.33,12.17 -  |
| chr5 | 8969918 | 8969932 | CSAR_peak_  | 8.39 -         |
| chr5 | 8970125 | 8970166 | CSAR_peak_! | 5.86 -         |
| chr5 | 8970253 | 8970305 | CSAR_peak_! | 5.86,7.27 -    |
| chr5 | 8970660 | 8970698 | CSAR_peak_  | 7.26 -         |
| chr5 | 8971311 | 8971407 | CSAR_peak_  | 7.27,6.21 -    |
| chr5 | 8972461 | 8972464 | CSAR_peak_  | 6.64 -         |
| chr5 | 8972523 | 8972619 | CSAR_peak_  | 27.36,10.07,-  |
| chr5 | 8972826 | 8972867 | CSAR_peak_  | 7.04,6.74 -    |
| chr5 | 8972918 | 8972944 | CSAR_peak_  | 15.21,22.15 -  |
| chr5 | 8974060 | 8974138 | CSAR_peak_  | 6.21,8.39 -    |
| chr5 | 9054943 | 9054962 | CSAR_peak_  | 6.21 -         |
| chr5 | 9055046 | 9055081 | CSAR_peak_  | 6.21 -         |
| chr5 | 9055094 | 9055179 | CSAR_peak_  | 10.83 -        |
| chr5 | 9079873 | 9079937 | CSAR_peak_  | 6.44 -         |
| chr5 | 9080013 | 9080026 | CSAR_peak_  | 6.21 -         |
| chr5 | 9080081 | 9080116 | CSAR_peak_  | 7.89 -         |
| chr5 | 9080214 | 9080225 | CSAR_peak_  | 8.12 -         |
| chr5 | 9080892 | 9080940 | CSAR_peak_  | 17.68,13.48 -  |
| chr5 | 9081049 | 9081100 | CSAR_peak_  | 23.95 -        |
| chr5 | 9081119 | 9081205 | CSAR_peak_  | 7.27,9.58 -    |
| chr5 | 9081239 | 9081305 | CSAR_peak_  | 9.58,14.88 -   |
| chr5 | 9081388 | 9081404 | CSAR_peak_  | 8.39 -         |
| chr5 | 9081504 | 9081547 | CSAR_peak_  | 6.21 -         |
| chr5 | 9081689 | 9081737 | CSAR_peak_  | 9.55,9.03 -    |
| chr5 | 9081834 | 9081843 | CSAR_peak_  | 5.82 -         |
| chr5 | 9081863 | 9081896 | CSAR_peak_  | 7.27 -         |
| chr5 | 9082026 | 9082073 | CSAR_peak_  | 6.03 -         |
| chr5 | 9085647 | 9085715 | CSAR_peak_  | 9.58 -         |
| chr5 | 9086121 | 9086165 | CSAR_peak_  | 7.27 -         |
| chr5 | 9086768 | 9086817 | CSAR_peak_  | 14.88 -        |
| chr5 | 9160129 | 9160168 | CSAR_peak_  | 10.31 -        |

|      |         |         |            |                   |   |
|------|---------|---------|------------|-------------------|---|
| chr5 | 9243774 | 9243832 | CSAR_peak_ | 13.48,7.58        | - |
| chr5 | 9243881 | 9244015 | CSAR_peak_ | 6.22              | - |
| chr5 | 9244207 | 9244290 | CSAR_peak_ | 27.64,19.36       | - |
| chr5 | 9244487 | 9244547 | CSAR_peak_ | 7.27,6.21         | - |
| chr5 | 9244834 | 9244873 | CSAR_peak_ | 6.21              | - |
| chr5 | 9244892 | 9245080 | CSAR_peak_ | 24.17,5.86,10.17  | - |
| chr5 | 9245081 | 9245170 | CSAR_peak_ | 25.08,11.07       | - |
| chr5 | 9245206 | 9245341 | CSAR_peak_ | 25.91,14.88,10.17 | - |
| chr5 | 9245751 | 9245804 | CSAR_peak_ | 8.65              | - |
| chr5 | 9245851 | 9245906 | CSAR_peak_ | 12.13,18.65       | - |
| chr5 | 9245920 | 9246104 | CSAR_peak_ | 10.31,8.39,7.27   | - |
| chr5 | 9246273 | 9246379 | CSAR_peak_ | 11.28,28.34,10.17 | - |
| chr5 | 9246705 | 9246741 | CSAR_peak_ | 6.21              | - |
| chr5 | 9246842 | 9247023 | CSAR_peak_ | 24.21,9.77        | - |
| chr5 | 9255624 | 9255682 | CSAR_peak_ | 9.58,7.73         | - |
| chr5 | 9255843 | 9255915 | CSAR_peak_ | 7.27,20.43        | - |
| chr5 | 9256016 | 9256053 | CSAR_peak_ | 12.13             | - |
| chr5 | 9257017 | 9257075 | CSAR_peak_ | 9.58              | - |
| chr5 | 9257448 | 9257497 | CSAR_peak_ | 12.13             | - |
| chr5 | 9257612 | 9257621 | CSAR_peak_ | 7.27              | - |
| chr5 | 9258759 | 9258773 | CSAR_peak_ | 6.21              | - |
| chr5 | 9258867 | 9258903 | CSAR_peak_ | 8.65,5.86         | - |
| chr5 | 9285735 | 9285903 | CSAR_peak_ | 11.03,9.48,5.86   | - |
| chr5 | 9286107 | 9286148 | CSAR_peak_ | 8.39              | - |
| chr5 | 9286371 | 9286434 | CSAR_peak_ | 12.13,33.03       | - |
| chr5 | 9286590 | 9286602 | CSAR_peak_ | 7.27              | - |
| chr5 | 9286777 | 9286839 | CSAR_peak_ | 10.83             | - |
| chr5 | 9287049 | 9287116 | CSAR_peak_ | 12.31             | - |
| chr5 | 9287714 | 9287770 | CSAR_peak_ | 7.27,7.92         | - |
| chr5 | 9399172 | 9399243 | CSAR_peak_ | 10.31,8.14        | - |
| chr5 | 9400198 | 9400265 | CSAR_peak_ | 6.03,6.85         | - |
| chr5 | 9400352 | 9400415 | CSAR_peak_ | 7.34,9.61,11.07   | - |
| chr5 | 9400504 | 9400617 | CSAR_peak_ | 30.81,14.88       | - |
| chr5 | 9400831 | 9400942 | CSAR_peak_ | 14.88,6.21        | - |
| chr5 | 9401042 | 9401120 | CSAR_peak_ | 12.13             | - |
| chr5 | 9401265 | 9401306 | CSAR_peak_ | 7.27              | - |
| chr5 | 9401577 | 9401619 | CSAR_peak_ | 14.88             | - |
| chr5 | 9401646 | 9401679 | CSAR_peak_ | 8.84              | - |
| chr5 | 9401738 | 9401788 | CSAR_peak_ | 22.52,6.57,10.17  | - |
| chr5 | 9403862 | 9403946 | CSAR_peak_ | 7.27,6.57         | - |
| chr5 | 9404480 | 9404518 | CSAR_peak_ | 7.27              | - |
| chr5 | 9404527 | 9404583 | CSAR_peak_ | 7.27              | - |



|      |         |         |            |                |   |
|------|---------|---------|------------|----------------|---|
| chr5 | 9405637 | 9405687 | CSAR_peak_ | 12.31,9.32     | - |
| chr5 | 9405720 | 9405755 | CSAR_peak_ | 6.21           | - |
| chr5 | 9406667 | 9406863 | CSAR_peak_ | 9.77,9.58,6.9  | - |
| chr5 | 9408018 | 9408214 | CSAR_peak_ | 21.94,10.83,(- | - |
| chr5 | 9408240 | 9408356 | CSAR_peak_ | 8.2,19.98,13.  | - |
| chr5 | 9408388 | 9408676 | CSAR_peak_ | 36.78,52.56,(- | - |
| chr5 | 9408705 | 9408772 | CSAR_peak_ | 7.27           | - |
| chr5 | 9408815 | 9408907 | CSAR_peak_ | 14.76          | - |
| chr5 | 9409317 | 9409412 | CSAR_peak_ | 12.17,10.02    | - |
| chr5 | 9409600 | 9409744 | CSAR_peak_ | 19.67,11.28,(- | - |
| chr5 | 9466424 | 9466473 | CSAR_peak_ | 8.39           | - |
| chr5 | 9488300 | 9488356 | CSAR_peak_ | 8.39           | - |
| chr5 | 9489279 | 9489327 | CSAR_peak_ | 6.03           | - |
| chr5 | 9494093 | 9494228 | CSAR_peak_ | 9.54,27.36,1(- | - |
| chr5 | 9494460 | 9494505 | CSAR_peak_ | 10.28,12.22    | - |
| chr5 | 9494542 | 9494586 | CSAR_peak_ | 9.45,12.39     | - |
| chr5 | 9515003 | 9515044 | CSAR_peak_ | 6.44           | - |
| chr5 | 9619246 | 9619300 | CSAR_peak_ | 7.27           | - |
| chr5 | 9668217 | 9668342 | CSAR_peak_ | 17.51,14.88    | - |
| chr5 | 9668425 | 9668458 | CSAR_peak_ | 14.88          | - |
| chr5 | 9668571 | 9668618 | CSAR_peak_ | 17.82,10.83    | - |
| chr5 | 9668686 | 9668862 | CSAR_peak_ | 23.2,23.65,2(- | - |
| chr5 | 9668884 | 9668961 | CSAR_peak_ | 40.66          | - |
| chr5 | 9668968 | 9669196 | CSAR_peak_ | 10.33,14.88,(- | - |
| chr5 | 9669278 | 9669285 | CSAR_peak_ | 24.52          | - |
| chr5 | 9669317 | 9669380 | CSAR_peak_ | 22.58,18.73    | - |
| chr5 | 9669443 | 9669560 | CSAR_peak_ | 12.59,21.35,(- | - |
| chr5 | 9669632 | 9669679 | CSAR_peak_ | 6.95,7.27,5.8  | - |
| chr5 | 9669699 | 9669759 | CSAR_peak_ | 12.31          | - |
| chr5 | 9669911 | 9669979 | CSAR_peak_ | 11.38,9.35     | - |
| chr5 | 9670051 | 9670088 | CSAR_peak_ | 13.66          | - |
| chr5 | 9670095 | 9670127 | CSAR_peak_ | 11.38          | - |
| chr5 | 9670210 | 9670304 | CSAR_peak_ | 31.2,19.36     | - |
| chr5 | 9670339 | 9670400 | CSAR_peak_ | 25.91,17.82    | - |
| chr5 | 9670599 | 9670686 | CSAR_peak_ | 27.64,17.82    | - |
| chr5 | 9672150 | 9672199 | CSAR_peak_ | 9.58           | - |
| chr5 | 9672314 | 9672370 | CSAR_peak_ | 24.21          | - |
| chr5 | 9672534 | 9672614 | CSAR_peak_ | 14.76,7.27     | - |
| chr5 | 9672709 | 9672771 | CSAR_peak_ | 8.39           | - |
| chr5 | 9673083 | 9673097 | CSAR_peak_ | 7.27           | - |
| chr5 | 9673265 | 9673300 | CSAR_peak_ | 13.48          | - |
| chr5 | 9674684 | 9674727 | CSAR_peak_ | 7.27           | - |

|      |          |          |             |               |   |
|------|----------|----------|-------------|---------------|---|
| chr5 | 9674823  | 9674873  | CSAR_peak_! | 5.86,6.95     | - |
| chr5 | 9675140  | 9675187  | CSAR_peak_! | 7.27          | - |
| chr5 | 9715331  | 9715411  | CSAR_peak_! | 20.43,9.58    | - |
| chr5 | 9715751  | 9715799  | CSAR_peak_! | 5.86          | - |
| chr5 | 9781728  | 9781737  | CSAR_peak_! | 6.21          | - |
| chr5 | 9781823  | 9781910  | CSAR_peak_! | 12.17,10.83   | - |
| chr5 | 9782878  | 9782892  | CSAR_peak_! | 14.76         | - |
| chr5 | 9782963  | 9783007  | CSAR_peak_! | 14.88         | - |
| chr5 | 9783448  | 9783503  | CSAR_peak_! | 5.95,9.77     | - |
| chr5 | 9783866  | 9783979  | CSAR_peak_! | 10.83         | - |
| chr5 | 9784170  | 9784274  | CSAR_peak_! | 10.83         | - |
| chr5 | 9789484  | 9789532  | CSAR_peak_! | 10.83         | - |
| chr5 | 9792930  | 9793062  | CSAR_peak_! | 12.13,10.02   | - |
| chr5 | 9807434  | 9807494  | CSAR_peak_! | 13.48         | - |
| chr5 | 9863916  | 9864036  | CSAR_peak_! | 7.27,10.83    | - |
| chr5 | 9864169  | 9864311  | CSAR_peak_! | 14.76,16.05   | - |
| chr5 | 9864828  | 9864873  | CSAR_peak_! | 14.88         | - |
| chr5 | 9874754  | 9874884  | CSAR_peak_! | 17.68,16.08,1 | - |
| chr5 | 9874942  | 9875036  | CSAR_peak_! | 9.58,7.58     | - |
| chr5 | 9875075  | 9875178  | CSAR_peak_! | 13.44,21.1,8. | - |
| chr5 | 9875252  | 9875319  | CSAR_peak_! | 6.12,29.43,1  | - |
| chr5 | 9875401  | 9875408  | CSAR_peak_! | 13.09,7.53    | - |
| chr5 | 9875409  | 9875460  | CSAR_peak_! | 10.94         | - |
| chr5 | 9875470  | 9875583  | CSAR_peak_! | 7.06,21.22,1  | - |
| chr5 | 9875591  | 9875718  | CSAR_peak_! | 14.85,9.31,1  | - |
| chr5 | 9875791  | 9875855  | CSAR_peak_! | 9.27,27.49    | - |
| chr5 | 9876231  | 9876378  | CSAR_peak_! | 9.58,8.28,24. | - |
| chr5 | 9942440  | 9942504  | CSAR_peak_! | 15.2          | - |
| chr5 | 9942879  | 9942923  | CSAR_peak_! | 9.27          | - |
| chr5 | 9942999  | 9943034  | CSAR_peak_! | 7.27          | - |
| chr5 | 9943702  | 9943783  | CSAR_peak_! | 17.82         | - |
| chr5 | 9943975  | 9944106  | CSAR_peak_! | 13.29,16.05   | - |
| chr5 | 9959003  | 9959069  | CSAR_peak_! | 7.58,7.27     | - |
| chr5 | 9959365  | 9959420  | CSAR_peak_! | 8.95,11.14    | - |
| chr5 | 9959490  | 9959600  | CSAR_peak_! | 9.55,16.33,6. | - |
| chr5 | 9959750  | 9959821  | CSAR_peak_! | 14.88,7.27    | - |
| chr5 | 9959974  | 9960022  | CSAR_peak_! | 17.68,16.11   | - |
| chr5 | 9960101  | 9960145  | CSAR_peak_! | 7.27          | - |
| chr5 | 10026387 | 10026467 | CSAR_peak_! | 9.58,7.27     | - |
| chr5 | 10026588 | 10026660 | CSAR_peak_! | 7.27          | - |
| chr5 | 10027292 | 10027337 | CSAR_peak_! | 8.14,6.85     | - |
| chr5 | 10027562 | 10027617 | CSAR_peak_! | 7.58,7.92     | - |

|      |          |          |            |                |   |
|------|----------|----------|------------|----------------|---|
| chr5 | 10027746 | 10027791 | CSAR_peak_ | 14.88,14.88    | - |
| chr5 | 10027871 | 10028039 | CSAR_peak_ | 24.17,26.55,   | - |
| chr5 | 10037656 | 10037748 | CSAR_peak_ | 12.13,12.17    | - |
| chr5 | 10037889 | 10038017 | CSAR_peak_ | 11.38          | - |
| chr5 | 10038068 | 10038206 | CSAR_peak_ | 10.02,14.76    | - |
| chr5 | 10038595 | 10038646 | CSAR_peak_ | 8.39           | - |
| chr5 | 10038807 | 10038839 | CSAR_peak_ | 9.58           | - |
| chr5 | 10044242 | 10044347 | CSAR_peak_ | 9.03,12.13     | - |
| chr5 | 10044379 | 10044430 | CSAR_peak_ | 9.48,6.21      | - |
| chr5 | 10044488 | 10044802 | CSAR_peak_ | 18.95,42.87,   | - |
| chr5 | 10044823 | 10044872 | CSAR_peak_ | 14.88          | - |
| chr5 | 10045081 | 10045208 | CSAR_peak_ | 12.13,13.48,   | - |
| chr5 | 10045361 | 10045443 | CSAR_peak_ | 13.51,9.77     | - |
| chr5 | 10069975 | 10070029 | CSAR_peak_ | 17.82,12.13    | - |
| chr5 | 10070156 | 10070255 | CSAR_peak_ | 8.95,9.58      | - |
| chr5 | 10070270 | 10070279 | CSAR_peak_ | 6.21           | - |
| chr5 | 10070316 | 10070352 | CSAR_peak_ | 5.79           | - |
| chr5 | 10070733 | 10070812 | CSAR_peak_ | 12.17,9.77     | - |
| chr5 | 10090435 | 10090522 | CSAR_peak_ | 6.81,7.58,10.  | - |
| chr5 | 10090663 | 10090717 | CSAR_peak_ | 7.27           | - |
| chr5 | 10090816 | 10090872 | CSAR_peak_ | 6.21           | - |
| chr5 | 10090931 | 10090967 | CSAR_peak_ | 6.21           | - |
| chr5 | 10091469 | 10091518 | CSAR_peak_ | 12.13          | - |
| chr5 | 10091594 | 10091672 | CSAR_peak_ | 12.13,9.58     | - |
| chr5 | 10091750 | 10091835 | CSAR_peak_ | 8.65,8.39      | - |
| chr5 | 10293553 | 10293624 | CSAR_peak_ | 9.58           | - |
| chr5 | 10293908 | 10293968 | CSAR_peak_ | 7.27,5.86      | - |
| chr5 | 10294220 | 10294284 | CSAR_peak_ | 9.77           | - |
| chr5 | 10342035 | 10342093 | CSAR_peak_ | 7.58           | - |
| chr5 | 10342116 | 10342160 | CSAR_peak_ | 9.41           | - |
| chr5 | 10342246 | 10342291 | CSAR_peak_ | 12.94,6.37     | - |
| chr5 | 10342312 | 10342332 | CSAR_peak_ | 7.58           | - |
| chr5 | 10342528 | 10342745 | CSAR_peak_ | 26.55,9.58,10. | - |
| chr5 | 10342923 | 10342961 | CSAR_peak_ | 7.27           | - |
| chr5 | 10344044 | 10344101 | CSAR_peak_ | 8.39           | - |
| chr5 | 10344539 | 10344656 | CSAR_peak_ | 8.65           | - |
| chr5 | 10345940 | 10346061 | CSAR_peak_ | 10.83,19.36    | - |
| chr5 | 10346106 | 10346161 | CSAR_peak_ | 6.44           | - |
| chr5 | 10346757 | 10346811 | CSAR_peak_ | 7.27,12.13     | - |
| chr5 | 10346839 | 10346943 | CSAR_peak_ | 12.31,12.17,   | - |
| chr5 | 10347040 | 10347127 | CSAR_peak_ | 6.95           | - |
| chr5 | 10347502 | 10347576 | CSAR_peak_ | 14.85,7.58     | - |

|      |          |          |            |               |   |
|------|----------|----------|------------|---------------|---|
| chr5 | 10347720 | 10347831 | CSAR_peak_ | 7.27,17.82    | - |
| chr5 | 10347863 | 10347917 | CSAR_peak_ | 20.94,6.03    | - |
| chr5 | 10347985 | 10348049 | CSAR_peak_ | 6.21,8.28     | - |
| chr5 | 10540814 | 10540867 | CSAR_peak_ | 8.39          | - |
| chr5 | 10540888 | 10540966 | CSAR_peak_ | 6.03,12.17    | - |
| chr5 | 10541427 | 10541475 | CSAR_peak_ | 9.58          | - |
| chr5 | 10541508 | 10541563 | CSAR_peak_ | 6.03          | - |
| chr5 | 10541832 | 10541947 | CSAR_peak_ | 8.39,10.83    | - |
| chr5 | 10542662 | 10542711 | CSAR_peak_ | 25.91,12.31   | - |
| chr5 | 10542782 | 10542830 | CSAR_peak_ | 13.44,20.43   | - |
| chr5 | 10785375 | 10785470 | CSAR_peak_ | 10.83,7.27    | - |
| chr5 | 10796620 | 10796821 | CSAR_peak_ | 20.18,17.28   | - |
| chr5 | 10796889 | 10796987 | CSAR_peak_ | 12.5,29.4,23. | - |
| chr5 | 10796988 | 10797126 | CSAR_peak_ | 12.74,22.58,1 | - |
| chr5 | 10797196 | 10797382 | CSAR_peak_ | 21.94,8.28,3  | - |
| chr5 | 10797403 | 10797521 | CSAR_peak_ | 14.88,9.58,8. | - |
| chr5 | 10797551 | 10797656 | CSAR_peak_ | 21.26,13.48   | - |
| chr5 | 10797881 | 10797966 | CSAR_peak_ | 13.44,14.88   | - |
| chr5 | 10798047 | 10798127 | CSAR_peak_ | 17.82,10.95   | - |
| chr5 | 10862452 | 10862522 | CSAR_peak_ | 14.88         | - |
| chr5 | 10862537 | 10862644 | CSAR_peak_ | 9.43,17.37    | - |
| chr5 | 10862684 | 10862838 | CSAR_peak_ | 5.86,17.68,2  | - |
| chr5 | 10862905 | 10862995 | CSAR_peak_ | 7.27,9.58,7.2 | - |
| chr5 | 10863137 | 10863313 | CSAR_peak_ | 13.09,5.86,1  | - |
| chr5 | 10863326 | 10863375 | CSAR_peak_ | 6.45,22.52,2  | - |
| chr5 | 10863432 | 10863554 | CSAR_peak_ | 26.97,22.58,  | - |
| chr5 | 10863595 | 10863670 | CSAR_peak_ | 27.94         | - |
| chr5 | 10863719 | 10863905 | CSAR_peak_ | 10.31,29.4    | - |
| chr5 | 10863949 | 10864053 | CSAR_peak_ | 12.6,8.65     | - |
| chr5 | 10877696 | 10877716 | CSAR_peak_ | 6.21          | - |
| chr5 | 10877859 | 10877950 | CSAR_peak_ | 12.13,8.39    | - |
| chr5 | 10877959 | 10878016 | CSAR_peak_ | 9.58          | - |
| chr5 | 10878100 | 10878144 | CSAR_peak_ | 7.27          | - |
| chr5 | 10879275 | 10879347 | CSAR_peak_ | 9.58,14.88    | - |
| chr5 | 11619332 | 11619373 | CSAR_peak_ | 8.39          | - |
| chr5 | 11620508 | 11620599 | CSAR_peak_ | 22.56,8.39    | - |
| chr5 | 12085378 | 12085428 | CSAR_peak_ | 7.27          | - |
| chr5 | 12807556 | 12807601 | CSAR_peak_ | 5.86          | - |
| chr5 | 12810808 | 12810876 | CSAR_peak_ | 6.1           | - |
| chr5 | 12819753 | 12819802 | CSAR_peak_ | 6.21          | - |
| chr5 | 12821249 | 12821294 | CSAR_peak_ | 6.03          | - |
| chr5 | 12822250 | 12822302 | CSAR_peak_ | 9.58          | - |

|      |          |          |             |                |   |
|------|----------|----------|-------------|----------------|---|
| chr5 | 12822996 | 12823046 | CSAR_peak_  | 7.26           | - |
| chr5 | 12823244 | 12823288 | CSAR_peak_  | 6.03           | - |
| chr5 | 12823740 | 12823795 | CSAR_peak_  | 9.97           | - |
| chr5 | 12824239 | 12824293 | CSAR_peak_  | 8.09           | - |
| chr5 | 12824737 | 12824797 | CSAR_peak_  | 9.1,6.74       | - |
| chr5 | 12849525 | 12849570 | CSAR_peak_! | 7              | - |
| chr5 | 12852777 | 12852845 | CSAR_peak_  | 8.65           | - |
| chr5 | 12859981 | 12860025 | CSAR_peak_  | 6.95           | - |
| chr5 | 12860981 | 12861032 | CSAR_peak_  | 6.21           | - |
| chr5 | 12863969 | 12864013 | CSAR_peak_  | 6.03           | - |
| chr5 | 12864968 | 12865014 | CSAR_peak_  | 6.95           | - |
| chr5 | 12866459 | 12866507 | CSAR_peak_  | 7.26           | - |
| chr5 | 12866956 | 12867005 | CSAR_peak_  | 6.22           | - |
| chr5 | 12867456 | 12867516 | CSAR_peak_  | 9.1,6.74       | - |
| chr5 | 12867712 | 12867756 | CSAR_peak_  | 7.27           | - |
| chr5 | 12868735 | 12868789 | CSAR_peak_  | 6.44           | - |
| chr5 | 12869206 | 12869255 | CSAR_peak_  | 6.03           | - |
| chr5 | 12962767 | 12962782 | CSAR_peak_  | 9.58           | - |
| chr5 | 12963420 | 12963487 | CSAR_peak_  | 17.82,22.58    | - |
| chr5 | 12963529 | 12963535 | CSAR_peak_  | 7.27           | - |
| chr5 | 12963620 | 12963666 | CSAR_peak_  | 23.49,8.39     | - |
| chr5 | 13108271 | 13108317 | CSAR_peak_  | 6.21           | - |
| chr5 | 13108517 | 13108551 | CSAR_peak_  | 14.08          | - |
| chr5 | 13108625 | 13108667 | CSAR_peak_  | 13.66          | - |
| chr5 | 13108674 | 13108733 | CSAR_peak_  | 7.58,7.27      | - |
| chr5 | 13109259 | 13109341 | CSAR_peak_  | 7.92,14.76,7.  | - |
| chr5 | 13110314 | 13110359 | CSAR_peak_  | 9.58           | - |
| chr5 | 13110412 | 13110436 | CSAR_peak_  | 9.77           | - |
| chr5 | 13110465 | 13110527 | CSAR_peak_  | 13.48          | - |
| chr5 | 13110665 | 13110689 | CSAR_peak_  | 8.39           | - |
| chr5 | 13110710 | 13110762 | CSAR_peak_  | 9.77           | - |
| chr5 | 13360518 | 13360587 | CSAR_peak_  | 8.39           | - |
| chr5 | 13364249 | 13364305 | CSAR_peak_  | 7.92,10.83     | - |
| chr5 | 13462525 | 13462594 | CSAR_peak_  | 6.95           | - |
| chr5 | 13462957 | 13463010 | CSAR_peak_  | 6.85           | - |
| chr5 | 13463136 | 13463224 | CSAR_peak_  | 24.21,9.03     | - |
| chr5 | 13463301 | 13463396 | CSAR_peak_  | 14.88,17.68    | - |
| chr5 | 13463622 | 13463646 | CSAR_peak_  | 6.21           | - |
| chr5 | 13463787 | 13463821 | CSAR_peak_! | 5.86           | - |
| chr5 | 13463956 | 13464017 | CSAR_peak_! | 8.92,7.92,7.2- | - |
| chr5 | 13464094 | 13464149 | CSAR_peak_  | 16.08,7.27     | - |
| chr5 | 13464272 | 13464322 | CSAR_peak_  | 6.21           | - |

|      |          |          |            |              |   |
|------|----------|----------|------------|--------------|---|
| chr5 | 13464846 | 13464902 | CSAR_peak_ | 12.13,6.21   | - |
| chr5 | 13474439 | 13474511 | CSAR_peak_ | 9.79         | - |
| chr5 | 13474728 | 13474826 | CSAR_peak_ | 9.58         | - |
| chr5 | 13475336 | 13475373 | CSAR_peak_ | 6.21         | - |
| chr5 | 13475837 | 13475885 | CSAR_peak_ | 7.27         | - |
| chr5 | 13476205 | 13476333 | CSAR_peak_ | 6.21,14.85,1 | - |
| chr5 | 13476491 | 13476554 | CSAR_peak_ | 7.27,18.65   | - |
| chr5 | 13476845 | 13476963 | CSAR_peak_ | 8.39,9.58    | - |
| chr5 | 13477155 | 13477196 | CSAR_peak_ | 8.39         | - |
| chr5 | 13477269 | 13477353 | CSAR_peak_ | 19.36,9.77   | - |
| chr5 | 13477562 | 13477620 | CSAR_peak_ | 7.27         | - |
| chr5 | 13478221 | 13478300 | CSAR_peak_ | 21.56,17.82  | - |
| chr5 | 13478310 | 13478535 | CSAR_peak_ | 11.96,7.27,1 | - |
| chr5 | 13478828 | 13478884 | CSAR_peak_ | 12.13,7.92   | - |
| chr5 | 13478943 | 13478993 | CSAR_peak_ | 10.02        | - |
| chr5 | 13479041 | 13479108 | CSAR_peak_ | 10.83        | - |
| chr5 | 13479379 | 13479428 | CSAR_peak_ | 7.27         | - |
| chr5 | 13479794 | 13479847 | CSAR_peak_ | 8.39         | - |
| chr5 | 13480017 | 13480090 | CSAR_peak_ | 7.34         | - |
| chr5 | 13480670 | 13480773 | CSAR_peak_ | 26.69,18.73  | - |
| chr5 | 13481785 | 13481945 | CSAR_peak_ | 19.36,19.98, | - |
| chr5 | 13482011 | 13482044 | CSAR_peak_ | 14.88        | - |
| chr5 | 13482126 | 13482226 | CSAR_peak_ | 11.28,13.66  | - |
| chr5 | 13484985 | 13485040 | CSAR_peak_ | 7.27         | - |
| chr5 | 13742414 | 13742470 | CSAR_peak_ | 9.58         | - |
| chr5 | 13742628 | 13742677 | CSAR_peak_ | 9.58,6.21    | - |
| chr5 | 13742860 | 13742926 | CSAR_peak_ | 20.94        | - |
| chr5 | 13743010 | 13743114 | CSAR_peak_ | 27.64,16.33  | - |
| chr5 | 13743182 | 13743222 | CSAR_peak_ | 7.27         | - |
| chr5 | 13743342 | 13743439 | CSAR_peak_ | 31.2,15.2    | - |
| chr5 | 13743495 | 13743564 | CSAR_peak_ | 7.58,13.48   | - |
| chr5 | 13744186 | 13744276 | CSAR_peak_ | 7.27,16.33   | - |
| chr5 | 13744361 | 13744425 | CSAR_peak_ | 8.09,15.2    | - |
| chr5 | 13744683 | 13744788 | CSAR_peak_ | 13.48,12.17  | - |
| chr5 | 13745139 | 13745193 | CSAR_peak_ | 6.21         | - |
| chr5 | 13745346 | 13745384 | CSAR_peak_ | 7.27         | - |
| chr5 | 13746031 | 13746086 | CSAR_peak_ | 7.27,9.58    | - |
| chr5 | 13746242 | 13746288 | CSAR_peak_ | 8.39,6.21    | - |
| chr5 | 13746892 | 13746931 | CSAR_peak_ | 9.58         | - |
| chr5 | 13747463 | 13747478 | CSAR_peak_ | 6.1          | - |
| chr5 | 13748050 | 13748083 | CSAR_peak_ | 6.21         | - |
| chr5 | 13749858 | 13750050 | CSAR_peak_ | 8.39         | - |

|      |          |          |            |               |   |
|------|----------|----------|------------|---------------|---|
| chr5 | 13750396 | 13750453 | CSAR_peak_ | 9.58          | - |
| chr5 | 13750779 | 13750867 | CSAR_peak_ | 5.62,9.58,9.7 | - |
| chr5 | 13751410 | 13751508 | CSAR_peak_ | 7.27,10.95    | - |
| chr5 | 13751774 | 13751808 | CSAR_peak_ | 7.27          | - |
| chr5 | 13753012 | 13753071 | CSAR_peak_ | 9.77          | - |
| chr5 | 13766916 | 13766961 | CSAR_peak_ | 6.21,12.13    | - |
| chr5 | 13767100 | 13767197 | CSAR_peak_ | 7.27,7.27     | - |
| chr5 | 13824956 | 13824979 | CSAR_peak_ | 6.44          | - |
| chr5 | 13825090 | 13825134 | CSAR_peak_ | 5.86          | - |
| chr5 | 13825576 | 13825607 | CSAR_peak_ | 6.21          | - |
| chr5 | 13825963 | 13825981 | CSAR_peak_ | 12.13,9.58    | - |
| chr5 | 13826141 | 13826177 | CSAR_peak_ | 8.39,7.27     | - |
| chr5 | 13826273 | 13826358 | CSAR_peak_ | 9.58,11.14    | - |
| chr5 | 13858149 | 13858242 | CSAR_peak_ | 20.43         | - |
| chr5 | 13858472 | 13858511 | CSAR_peak_ | 8.39          | - |
| chr5 | 13864638 | 13864692 | CSAR_peak_ | 12.13         | - |
| chr5 | 13865410 | 13865459 | CSAR_peak_ | 9.58,6.21     | - |
| chr5 | 13865983 | 13866034 | CSAR_peak_ | 8.39          | - |
| chr5 | 13866155 | 13866220 | CSAR_peak_ | 12.13,6.45    | - |
| chr5 | 13866303 | 13866371 | CSAR_peak_ | 6.21,7.58     | - |
| chr5 | 13866600 | 13866656 | CSAR_peak_ | 7.27          | - |
| chr5 | 13866762 | 13866839 | CSAR_peak_ | 7.58          | - |
| chr5 | 13867200 | 13867242 | CSAR_peak_ | 5.86          | - |
| chr5 | 13867380 | 13867407 | CSAR_peak_ | 7.27          | - |
| chr5 | 13873247 | 13873263 | CSAR_peak_ | 6.21          | - |
| chr5 | 13873374 | 13873443 | CSAR_peak_ | 7.27          | - |
| chr5 | 13900977 | 13901019 | CSAR_peak_ | 9.58          | - |
| chr5 | 13901088 | 13901153 | CSAR_peak_ | 33.03,6.11    | - |
| chr5 | 13901170 | 13901224 | CSAR_peak_ | 7.58          | - |
| chr5 | 13901333 | 13901394 | CSAR_peak_ | 13.51,16.33   | - |
| chr5 | 13901471 | 13901541 | CSAR_peak_ | 37.04         | - |
| chr5 | 13901973 | 13902011 | CSAR_peak_ | 10.83         | - |
| chr5 | 13902297 | 13902338 | CSAR_peak_ | 21.56,6.57    | - |
| chr5 | 13902344 | 13902476 | CSAR_peak_ | 28.62,12.31   | - |
| chr5 | 13902629 | 13902681 | CSAR_peak_ | 10.83         | - |
| chr5 | 13902712 | 13902842 | CSAR_peak_ | 10.31,16.33   | - |
| chr5 | 13911229 | 13911298 | CSAR_peak_ | 8.39,9.58     | - |
| chr5 | 13911845 | 13911949 | CSAR_peak_ | 25.62,6.44    | - |
| chr5 | 13912208 | 13912309 | CSAR_peak_ | 14.88,7.58    | - |
| chr5 | 13912490 | 13912541 | CSAR_peak_ | 6.21          | - |
| chr5 | 13912751 | 13912839 | CSAR_peak_ | 13.48,14.88   | - |
| chr5 | 13913032 | 13913197 | CSAR_peak_ | 12.13         | - |

|      |          |          |            |               |   |
|------|----------|----------|------------|---------------|---|
| chr5 | 13913573 | 13913605 | CSAR_peak_ | 7.27          | - |
| chr5 | 13913654 | 13913696 | CSAR_peak_ | 8.39          | - |
| chr5 | 13913724 | 13913803 | CSAR_peak_ | 16.19,14.76   | - |
| chr5 | 13913881 | 13913933 | CSAR_peak_ | 14.76,16.19   | - |
| chr5 | 13914004 | 13914101 | CSAR_peak_ | 10.18         | - |
| chr5 | 13914602 | 13914663 | CSAR_peak_ | 6.21          | - |
| chr5 | 13914846 | 13914895 | CSAR_peak_ | 12.13,8.2     | - |
| chr5 | 13914917 | 13915039 | CSAR_peak_ | 14.85,17.82   | - |
| chr5 | 13915089 | 13915132 | CSAR_peak_ | 13.48,6.95    | - |
| chr5 | 13915622 | 13915692 | CSAR_peak_ | 17.51,17.82   | - |
| chr5 | 13915797 | 13915836 | CSAR_peak_ | 12.13,8.39    | - |
| chr5 | 13956523 | 13956589 | CSAR_peak_ | 17.82         | - |
| chr5 | 13957006 | 13957046 | CSAR_peak_ | 7.27          | - |
| chr5 | 13957588 | 13957630 | CSAR_peak_ | 16.11         | - |
| chr5 | 13957708 | 13957776 | CSAR_peak_ | 14.88,11.38   | - |
| chr5 | 13957786 | 13957826 | CSAR_peak_ | 7.92,6.85     | - |
| chr5 | 13957952 | 13957995 | CSAR_peak_ | 9.77,7.27     | - |
| chr5 | 13958166 | 13958315 | CSAR_peak_ | 16.11,14.88   | - |
| chr5 | 13958351 | 13958362 | CSAR_peak_ | 7.27          | - |
| chr5 | 13958443 | 13958501 | CSAR_peak_ | 21.35         | - |
| chr5 | 13958640 | 13958701 | CSAR_peak_ | 9.97,6.57,8.9 | - |
| chr5 | 13958821 | 13958890 | CSAR_peak_ | 9.58          | - |
| chr5 | 13987574 | 13987648 | CSAR_peak_ | 17.82,7.27    | - |
| chr5 | 13988340 | 13988389 | CSAR_peak_ | 9.58          | - |
| chr5 | 14031678 | 14031686 | CSAR_peak_ | 6.21          | - |
| chr5 | 14032621 | 14032686 | CSAR_peak_ | 17.37,11.38   | - |
| chr5 | 14032799 | 14032819 | CSAR_peak_ | 6.21          | - |
| chr5 | 14033527 | 14033591 | CSAR_peak_ | 7.27          | - |
| chr5 | 14034970 | 14035144 | CSAR_peak_ | 10.95,7.27    | - |
| chr5 | 14119875 | 14119953 | CSAR_peak_ | 7.27,6.44     | - |
| chr5 | 14121721 | 14121775 | CSAR_peak_ | 10.02         | - |
| chr5 | 14122399 | 14122484 | CSAR_peak_ | 7.58          | - |
| chr5 | 14122770 | 14122854 | CSAR_peak_ | 6.21          | - |
| chr5 | 14136621 | 14136677 | CSAR_peak_ | 7.58          | - |
| chr5 | 14140947 | 14140997 | CSAR_peak_ | 6.21          | - |
| chr5 | 14142106 | 14142152 | CSAR_peak_ | 7.27          | - |
| chr5 | 14142413 | 14142551 | CSAR_peak_ | 14.88,13.48   | - |
| chr5 | 14142686 | 14142754 | CSAR_peak_ | 12.17         | - |
| chr5 | 14236327 | 14236388 | CSAR_peak_ | 18.73,7.27    | - |
| chr5 | 14236499 | 14236528 | CSAR_peak_ | 12.13         | - |
| chr5 | 14237063 | 14237104 | CSAR_peak_ | 6.21          | - |
| chr5 | 14237661 | 14237722 | CSAR_peak_ | 6.21          | - |



|      |          |          |             |                 |   |
|------|----------|----------|-------------|-----------------|---|
| chr5 | 14249348 | 14249409 | CSAR_peak_! | 5.86            | - |
| chr5 | 14249679 | 14249706 | CSAR_peak_! | 8.39            | - |
| chr5 | 14250440 | 14250484 | CSAR_peak_! | 6.21            | - |
| chr5 | 14250562 | 14250639 | CSAR_peak_! | 7.27            | - |
| chr5 | 14252001 | 14252057 | CSAR_peak_! | 7.92            | - |
| chr5 | 14252685 | 14252726 | CSAR_peak_! | 6.21            | - |
| chr5 | 14254793 | 14254868 | CSAR_peak_! | 6.21            | - |
| chr5 | 14534909 | 14534948 | CSAR_peak_! | 8.39            | - |
| chr5 | 14534990 | 14535063 | CSAR_peak_! | 6.57            | - |
| chr5 | 14535090 | 14535155 | CSAR_peak_! | 18.35,17.68     | - |
| chr5 | 14535262 | 14535299 | CSAR_peak_! | 8.65,13.51      | - |
| chr5 | 14535326 | 14535387 | CSAR_peak_! | 6.94            | - |
| chr5 | 14535634 | 14535725 | CSAR_peak_! | 7.27            | - |
| chr5 | 14536479 | 14536539 | CSAR_peak_! | 7.27            | - |
| chr5 | 14536540 | 14536552 | CSAR_peak_! | 7.27            | - |
| chr5 | 14536637 | 14536694 | CSAR_peak_! | 18.65           | - |
| chr5 | 14537010 | 14537017 | CSAR_peak_! | 9.58            | - |
| chr5 | 14537191 | 14537254 | CSAR_peak_! | 6.21,12.31      | - |
| chr5 | 14537529 | 14537563 | CSAR_peak_! | 7.27            | - |
| chr5 | 14537636 | 14537640 | CSAR_peak_! | 5.86            | - |
| chr5 | 14537739 | 14537817 | CSAR_peak_! | 11.03,6.21,1.1  | - |
| chr5 | 14538179 | 14538221 | CSAR_peak_! | 7.58,5.86       | - |
| chr5 | 14538555 | 14538599 | CSAR_peak_! | 6.21            | - |
| chr5 | 14542825 | 14542867 | CSAR_peak_! | 6.21            | - |
| chr5 | 14723599 | 14723621 | CSAR_peak_! | 9.58            | - |
| chr5 | 14724215 | 14724253 | CSAR_peak_! | 6.21            | - |
| chr5 | 14724654 | 14724707 | CSAR_peak_! | 13.48           | - |
| chr5 | 14725148 | 14725209 | CSAR_peak_! | 17.82           | - |
| chr5 | 14725535 | 14725557 | CSAR_peak_! | 6.21            | - |
| chr5 | 14725632 | 14725677 | CSAR_peak_! | 7.27            | - |
| chr5 | 14725712 | 14725761 | CSAR_peak_! | 8.39,7.27       | - |
| chr5 | 14751172 | 14751213 | CSAR_peak_! | 9.58,9.77       | - |
| chr5 | 14751234 | 14751289 | CSAR_peak_! | 9.58            | - |
| chr5 | 14751300 | 14751537 | CSAR_peak_! | 25.21,27.61     | - |
| chr5 | 14751561 | 14751607 | CSAR_peak_! | 8.28            | - |
| chr5 | 14751809 | 14751991 | CSAR_peak_! | 38.35,24.21     | - |
| chr5 | 14752044 | 14752281 | CSAR_peak_! | 69.66,36.5,21.1 | - |
| chr5 | 14752317 | 14752416 | CSAR_peak_! | 41.89,9.58,21.1 | - |
| chr5 | 14752438 | 14752544 | CSAR_peak_! | 13.48,23.03,1.1 | - |
| chr5 | 14752551 | 14752604 | CSAR_peak_! | 7.27            | - |
| chr5 | 14752635 | 14752797 | CSAR_peak_! | 24.21,13.51,1.1 | - |
| chr5 | 14752819 | 14752998 | CSAR_peak_! | 25.18,29.69     | - |

|      |          |          |            |               |   |
|------|----------|----------|------------|---------------|---|
| chr5 | 14774605 | 14774648 | CSAR_peak_ | 6.21          | - |
| chr5 | 14812854 | 14813025 | CSAR_peak_ | 7.36,9.58,9.0 | - |
| chr5 | 14813117 | 14813155 | CSAR_peak_ | 8.84          | - |
| chr5 | 14813244 | 14813303 | CSAR_peak_ | 20.43,14.76   | - |
| chr5 | 14814208 | 14814280 | CSAR_peak_ | 11.8,9.97,5.9 | - |
| chr5 | 14814814 | 14814911 | CSAR_peak_ | 12.74,8.2,9.7 | - |
| chr5 | 14815698 | 14815779 | CSAR_peak_ | 6.21,24.15,1  | - |
| chr5 | 14815788 | 14815800 | CSAR_peak_ | 12.13         | - |
| chr5 | 14815840 | 14815878 | CSAR_peak_ | 7.89          | - |
| chr5 | 14815938 | 14815984 | CSAR_peak_ | 10.95,12.13   | - |
| chr5 | 14816431 | 14816478 | CSAR_peak_ | 7.27          | - |
| chr5 | 14818128 | 14818188 | CSAR_peak_ | 12.13         | - |
| chr5 | 14818290 | 14818403 | CSAR_peak_ | 10.83,7.27    | - |
| chr5 | 14867766 | 14867820 | CSAR_peak_ | 6.21          | - |
| chr5 | 14885149 | 14885199 | CSAR_peak_ | 8.95          | - |
| chr5 | 14927801 | 14927853 | CSAR_peak_ | 6.21          | - |
| chr5 | 14928286 | 14928336 | CSAR_peak_ | 6.21          | - |
| chr5 | 14928573 | 14928637 | CSAR_peak_ | 9.58          | - |
| chr5 | 14928891 | 14928957 | CSAR_peak_ | 7.73,5.86     | - |
| chr5 | 14929328 | 14929477 | CSAR_peak_ | 7,10.31,5.62, | - |
| chr5 | 14929531 | 14929534 | CSAR_peak_ | 6.21          | - |
| chr5 | 14929557 | 14929596 | CSAR_peak_ | 8.39          | - |
| chr5 | 14930405 | 14930442 | CSAR_peak_ | 7.27          | - |
| chr5 | 14930463 | 14930526 | CSAR_peak_ | 14.76         | - |
| chr5 | 14930572 | 14930598 | CSAR_peak_ | 6.21          | - |
| chr5 | 14931136 | 14931186 | CSAR_peak_ | 9.58          | - |
| chr5 | 14931189 | 14931231 | CSAR_peak_ | 11.14         | - |
| chr5 | 14931772 | 14931831 | CSAR_peak_ | 7.27          | - |
| chr5 | 14931896 | 14932000 | CSAR_peak_ | 6.44,7.13     | - |
| chr5 | 14932102 | 14932268 | CSAR_peak_ | 13.51,7.27,9. | - |
| chr5 | 14932758 | 14932844 | CSAR_peak_ | 16.08,7.27    | - |
| chr5 | 14933663 | 14933693 | CSAR_peak_ | 6.11          | - |
| chr5 | 14933709 | 14933764 | CSAR_peak_ | 9.58          | - |
| chr5 | 14933824 | 14933953 | CSAR_peak_ | 14.85,21.68   | - |
| chr5 | 14933977 | 14933984 | CSAR_peak_ | 9.77          | - |
| chr5 | 14934064 | 14934103 | CSAR_peak_ | 8.39,10.94    | - |
| chr5 | 14934136 | 14934156 | CSAR_peak_ | 7.27          | - |
| chr5 | 14934232 | 14934291 | CSAR_peak_ | 19.45,8.02    | - |
| chr5 | 14934293 | 14934376 | CSAR_peak_ | 8.9,7.27      | - |
| chr5 | 14934389 | 14934541 | CSAR_peak_ | 6.12,9.48     | - |
| chr5 | 14934675 | 14934729 | CSAR_peak_ | 9.61          | - |
| chr5 | 14934959 | 14935072 | CSAR_peak_ | 17.87,9.58    | - |

|      |          |          |            |                   |   |
|------|----------|----------|------------|-------------------|---|
| chr5 | 14935135 | 14935142 | CSAR_peak_ | 10.52             | - |
| chr5 | 14935222 | 14935284 | CSAR_peak_ | 8.14,6.21         | - |
| chr5 | 14935583 | 14935620 | CSAR_peak_ | 10.83             | - |
| chr5 | 14975231 | 14975306 | CSAR_peak_ | 13.48             | - |
| chr5 | 14975448 | 14975461 | CSAR_peak_ | 7.92              | - |
| chr5 | 14975499 | 14975583 | CSAR_peak_ | 7.27,9.58         | - |
| chr5 | 14982749 | 14982758 | CSAR_peak_ | 7.27              | - |
| chr5 | 14982841 | 14982883 | CSAR_peak_ | 6.21              | - |
| chr5 | 14982885 | 14982952 | CSAR_peak_ | 10.94             | - |
| chr5 | 14996922 | 14996978 | CSAR_peak_ | 9.58              | - |
| chr5 | 14998723 | 14998766 | CSAR_peak_ | 14.88             | - |
| chr5 | 14998952 | 14999031 | CSAR_peak_ | 18.95,6.85        | - |
| chr5 | 14999043 | 14999104 | CSAR_peak_ | 6.95              | - |
| chr5 | 14999115 | 14999461 | CSAR_peak_ | 30.81,20.21,10.83 | - |
| chr5 | 15004735 | 15004830 | CSAR_peak_ | 13.48,10.83       | - |
| chr5 | 15004951 | 15005135 | CSAR_peak_ | 7.06,13.09,10.83  | - |
| chr5 | 15005907 | 15005964 | CSAR_peak_ | 7.27              | - |
| chr5 | 15006056 | 15006160 | CSAR_peak_ | 9.58,20.94        | - |
| chr5 | 15057038 | 15057089 | CSAR_peak_ | 9.58              | - |
| chr5 | 15058937 | 15058982 | CSAR_peak_ | 7.27              | - |
| chr5 | 15059859 | 15059923 | CSAR_peak_ | 13.44             | - |
| chr5 | 15103408 | 15103496 | CSAR_peak_ | 10.83,9.58        | - |
| chr5 | 15103594 | 15103635 | CSAR_peak_ | 5.86              | - |
| chr5 | 15166116 | 15166198 | CSAR_peak_ | 8.39              | - |
| chr5 | 15167547 | 15167594 | CSAR_peak_ | 8.2               | - |
| chr5 | 15171646 | 15171708 | CSAR_peak_ | 20.94,9.58        | - |
| chr5 | 15171829 | 15171873 | CSAR_peak_ | 12.13             | - |
| chr5 | 15172304 | 15172349 | CSAR_peak_ | 8.65              | - |
| chr5 | 15172438 | 15172506 | CSAR_peak_ | 7.27,6.44         | - |
| chr5 | 15174057 | 15174110 | CSAR_peak_ | 7.58              | - |
| chr5 | 15174566 | 15174582 | CSAR_peak_ | 7.27              | - |
| chr5 | 15220844 | 15220887 | CSAR_peak_ | 8.39              | - |
| chr5 | 15220996 | 15221050 | CSAR_peak_ | 23.03,14.88       | - |
| chr5 | 15221148 | 15221198 | CSAR_peak_ | 8.39,12.13        | - |
| chr5 | 15221791 | 15221833 | CSAR_peak_ | 6.21              | - |
| chr5 | 15221977 | 15222015 | CSAR_peak_ | 6.21              | - |
| chr5 | 15223289 | 15223423 | CSAR_peak_ | 8.39,6.81         | - |
| chr5 | 15223544 | 15223615 | CSAR_peak_ | 17.82,13.48       | - |
| chr5 | 15223737 | 15223800 | CSAR_peak_ | 8.65,7.27         | - |
| chr5 | 15223839 | 15223876 | CSAR_peak_ | 6.21              | - |
| chr5 | 15223886 | 15223938 | CSAR_peak_ | 9.77,7.27         | - |
| chr5 | 15223939 | 15224147 | CSAR_peak_ | 24.21,7.27,10.83  | - |

|      |          |          |            |                |
|------|----------|----------|------------|----------------|
| chr5 | 15224151 | 15224298 | CSAR_peak_ | 21.94,5.86,8.- |
| chr5 | 15224299 | 15224651 | CSAR_peak_ | 8.14,9.32,5.8- |
| chr5 | 15224655 | 15224781 | CSAR_peak_ | 35.83,14.88,-  |
| chr5 | 15224876 | 15224953 | CSAR_peak_ | 17.82,16.33 -  |
| chr5 | 15293190 | 15293226 | CSAR_peak_ | 9.58 -         |
| chr5 | 15294229 | 15294303 | CSAR_peak_ | 6.81 -         |
| chr5 | 15294366 | 15294439 | CSAR_peak_ | 16.33 -        |
| chr5 | 15377551 | 15377741 | CSAR_peak_ | 42.76,24.53 -  |
| chr5 | 15377911 | 15378097 | CSAR_peak_ | 22.97,19.98,-  |
| chr5 | 15378136 | 15378162 | CSAR_peak_ | 10.96 -        |
| chr5 | 15381317 | 15381443 | CSAR_peak_ | 14.3,17.52 -   |
| chr5 | 15381583 | 15381620 | CSAR_peak_ | 10.36,11.99 -  |
| chr5 | 15381684 | 15381718 | CSAR_peak_ | 17.88,8.9 -    |
| chr5 | 15381808 | 15381845 | CSAR_peak_ | 16.34,8.65 -   |
| chr5 | 15384400 | 15384590 | CSAR_peak_ | 29.16,14.73 -  |
| chr5 | 15384761 | 15384794 | CSAR_peak_ | 12.51,9.66 -   |
| chr5 | 15384799 | 15384848 | CSAR_peak_ | 6.21,6.57 -    |
| chr5 | 15417960 | 15418015 | CSAR_peak_ | 22.56,7.27 -   |
| chr5 | 15418500 | 15418599 | CSAR_peak_ | 17.82 -        |
| chr5 | 15419654 | 15419743 | CSAR_peak_ | 16.33 -        |
| chr5 | 15419775 | 15419848 | CSAR_peak_ | 14.88 -        |
| chr5 | 15419850 | 15419909 | CSAR_peak_ | 7.58 -         |
| chr5 | 15473880 | 15473917 | CSAR_peak_ | 9.58 -         |
| chr5 | 15474046 | 15474122 | CSAR_peak_ | 12.74,9.58 -   |
| chr5 | 15474448 | 15474502 | CSAR_peak_ | 9.58,7.58 -    |
| chr5 | 15474886 | 15474931 | CSAR_peak_ | 7.58 -         |
| chr5 | 15481668 | 15481726 | CSAR_peak_ | 10.83 -        |
| chr5 | 15545798 | 15545867 | CSAR_peak_ | 7.27 -         |
| chr5 | 15547212 | 15547287 | CSAR_peak_ | 8.39,7.27 -    |
| chr5 | 15547563 | 15547597 | CSAR_peak_ | 8.39 -         |
| chr5 | 15562379 | 15562468 | CSAR_peak_ | 8.39,6.21 -    |
| chr5 | 15562807 | 15562859 | CSAR_peak_ | 20.94,7.27 -   |
| chr5 | 15563516 | 15563591 | CSAR_peak_ | 10.95,7.27 -   |
| chr5 | 15563683 | 15563773 | CSAR_peak_ | 7.27,7.27 -    |
| chr5 | 15564293 | 15564377 | CSAR_peak_ | 17.51,17.37 -  |
| chr5 | 15564539 | 15564624 | CSAR_peak_ | 9.58 -         |
| chr5 | 15566836 | 15566848 | CSAR_peak_ | 7.27 -         |
| chr5 | 15567163 | 15567209 | CSAR_peak_ | 10.82,6.21 -   |
| chr5 | 15568295 | 15568331 | CSAR_peak_ | 6.03,7.27 -    |
| chr5 | 15568350 | 15568413 | CSAR_peak_ | 6.81 -         |
| chr5 | 15568417 | 15568499 | CSAR_peak_ | 15.21 -        |
| chr5 | 15568522 | 15568651 | CSAR_peak_ | 18.65,12.17 -  |

|      |          |          |            |                |   |
|------|----------|----------|------------|----------------|---|
| chr5 | 15568803 | 15568899 | CSAR_peak_ | 10.83,8.39     | - |
| chr5 | 15769501 | 15769560 | CSAR_peak_ | 7.27           | - |
| chr5 | 15825779 | 15825855 | CSAR_peak_ | 6.21           | - |
| chr5 | 15826335 | 15826412 | CSAR_peak_ | 8.09,25.91     | - |
| chr5 | 15826438 | 15826524 | CSAR_peak_ | 7,31.73,8.94,- |   |
| chr5 | 15826627 | 15826668 | CSAR_peak_ | 7.27           | - |
| chr5 | 15826830 | 15826914 | CSAR_peak_ | 17.82          | - |
| chr5 | 15827461 | 15827519 | CSAR_peak_ | 10.31          | - |
| chr5 | 15847293 | 15847359 | CSAR_peak_ | 21.35          | - |
| chr5 | 15847390 | 15847478 | CSAR_peak_ | 7.27,7.27      | - |
| chr5 | 15847586 | 15847708 | CSAR_peak_ | 13.44,14.34,-  |   |
| chr5 | 15847804 | 15847855 | CSAR_peak_ | 9.58           | - |
| chr5 | 15847986 | 15848050 | CSAR_peak_ | 25.91,7.27     | - |
| chr5 | 15848108 | 15848250 | CSAR_peak_ | 12.17,8.14     | - |
| chr5 | 15848503 | 15848553 | CSAR_peak_ | 8.39           | - |
| chr5 | 15859314 | 15859394 | CSAR_peak_ | 5.86,6.81      | - |
| chr5 | 15859457 | 15859511 | CSAR_peak_ | 5.86,10.83     | - |
| chr5 | 15859600 | 15859672 | CSAR_peak_ | 17.19,12.13    | - |
| chr5 | 16065232 | 16065341 | CSAR_peak_ | 16.33,7.27,2(- |   |
| chr5 | 16065800 | 16065856 | CSAR_peak_ | 12.13          | - |
| chr5 | 16066135 | 16066224 | CSAR_peak_ | 14.88          | - |
| chr5 | 16066400 | 16066446 | CSAR_peak_ | 7.27           | - |
| chr5 | 16066636 | 16066690 | CSAR_peak_ | 6.21           | - |
| chr5 | 16067244 | 16067303 | CSAR_peak_ | 8.39,9.58      | - |
| chr5 | 16069496 | 16069559 | CSAR_peak_ | 8.39           | - |
| chr5 | 16131673 | 16131856 | CSAR_peak_ | 33.03,5.86,9.- |   |
| chr5 | 16131916 | 16131968 | CSAR_peak_ | 8.39           | - |
| chr5 | 16131975 | 16132041 | CSAR_peak_ | 9.58,12.13     | - |
| chr5 | 16132075 | 16132120 | CSAR_peak_ | 6.21           | - |
| chr5 | 16132127 | 16132337 | CSAR_peak_ | 10.83,19.36    | - |
| chr5 | 16132363 | 16132441 | CSAR_peak_ | 14.88          | - |
| chr5 | 16132461 | 16132511 | CSAR_peak_ | 8.39           | - |
| chr5 | 16132613 | 16132661 | CSAR_peak_ | 14.88          | - |
| chr5 | 16132911 | 16132976 | CSAR_peak_ | 14.88          | - |
| chr5 | 16133350 | 16133390 | CSAR_peak_ | 9.58           | - |
| chr5 | 16133420 | 16133481 | CSAR_peak_ | 12.13          | - |
| chr5 | 16133632 | 16133731 | CSAR_peak_ | 7.27           | - |
| chr5 | 16133880 | 16133973 | CSAR_peak_ | 8.39           | - |
| chr5 | 16133985 | 16134042 | CSAR_peak_ | 12.31          | - |
| chr5 | 16134071 | 16134117 | CSAR_peak_ | 9.58           | - |
| chr5 | 16134454 | 16134572 | CSAR_peak_ | 27.64,11.14    | - |
| chr5 | 16134598 | 16134693 | CSAR_peak_ | 8.65,6.57      | - |

|      |          |          |            |                |   |
|------|----------|----------|------------|----------------|---|
| chr5 | 16147489 | 16147600 | CSAR_peak_ | 23.03,13.48    | - |
| chr5 | 16147604 | 16147663 | CSAR_peak_ | 9.58           | - |
| chr5 | 16147878 | 16147941 | CSAR_peak_ | 14.88,9.97     | - |
| chr5 | 16148036 | 16148152 | CSAR_peak_ | 20.18,6.44,5.- |   |
| chr5 | 16148536 | 16148641 | CSAR_peak_ | 10.83          | - |
| chr5 | 16148675 | 16148782 | CSAR_peak_ | 19.96,11.38    | - |
| chr5 | 16148997 | 16149102 | CSAR_peak_ | 7.27,11.66     | - |
| chr5 | 16166216 | 16166307 | CSAR_peak_ | 99.51,28.29,-  |   |
| chr5 | 16184100 | 16184141 | CSAR_peak_ | 6.21           | - |
| chr5 | 16184271 | 16184322 | CSAR_peak_ | 7.27           | - |
| chr5 | 16184357 | 16184414 | CSAR_peak_ | 6.21           | - |
| chr5 | 16184918 | 16185243 | CSAR_peak_ | 27.11,12.17,-  |   |
| chr5 | 16185356 | 16185449 | CSAR_peak_ | 7.27,7.27      | - |
| chr5 | 16185461 | 16185475 | CSAR_peak_ | 6.21           | - |
| chr5 | 16185537 | 16185622 | CSAR_peak_ | 6.64,15.9      | - |
| chr5 | 16185630 | 16185692 | CSAR_peak_ | 27.11,23.71    | - |
| chr5 | 16185780 | 16185821 | CSAR_peak_ | 20.17,10.13    | - |
| chr5 | 16185858 | 16185908 | CSAR_peak_ | 14.76,7.27     | - |
| chr5 | 16185970 | 16186155 | CSAR_peak_ | 13.44,26.69,-  |   |
| chr5 | 16186164 | 16186442 | CSAR_peak_ | 19.18,42.44,-  |   |
| chr5 | 16186451 | 16186739 | CSAR_peak_ | 52.34,6.03,4-  |   |
| chr5 | 16186743 | 16186824 | CSAR_peak_ | 13.51          | - |
| chr5 | 16186871 | 16186911 | CSAR_peak_ | 7.27           | - |
| chr5 | 16186968 | 16187034 | CSAR_peak_ | 13.48,24.21    | - |
| chr5 | 16187083 | 16187132 | CSAR_peak_ | 7.27           | - |
| chr5 | 16187192 | 16187415 | CSAR_peak_ | 38.71,32.46,-  |   |
| chr5 | 16187524 | 16187569 | CSAR_peak_ | 9.58           | - |
| chr5 | 16187660 | 16188042 | CSAR_peak_ | 18.85,30.81,-  |   |
| chr5 | 16188106 | 16188162 | CSAR_peak_ | 17.82,12.13    | - |
| chr5 | 16188199 | 16188298 | CSAR_peak_ | 24.72,13.84    | - |
| chr5 | 16188539 | 16188624 | CSAR_peak_ | 24.52          | - |
| chr5 | 16188651 | 16189259 | CSAR_peak_ | 36.32,35.83,-  |   |
| chr5 | 16189335 | 16189411 | CSAR_peak_ | 7.27,9.58      | - |
| chr5 | 16189414 | 16189463 | CSAR_peak_ | 6.95           | - |
| chr5 | 16189478 | 16189629 | CSAR_peak_ | 22.58,35.26,-  |   |
| chr5 | 16189826 | 16190159 | CSAR_peak_ | 41.68,31.58    | - |
| chr5 | 16190239 | 16190518 | CSAR_peak_ | 36.78,77.57,-  |   |
| chr5 | 16190536 | 16190703 | CSAR_peak_ | 35.7,46.59     | - |
| chr5 | 16190720 | 16190895 | CSAR_peak_ | 37.04,29.4     | - |
| chr5 | 16190927 | 16191147 | CSAR_peak_ | 38.71,52.19,-  |   |
| chr5 | 16191149 | 16191280 | CSAR_peak_ | 87.13,34.04    | - |
| chr5 | 16191304 | 16191509 | CSAR_peak_ | 7.27,30.34,3-  |   |

|      |          |          |            |                |
|------|----------|----------|------------|----------------|
| chr5 | 16191640 | 16192006 | CSAR_peak_ | 28.34,48.73,-  |
| chr5 | 16192242 | 16192445 | CSAR_peak_ | 44.63,39.92 -  |
| chr5 | 16192465 | 16192479 | CSAR_peak_ | 9.61 -         |
| chr5 | 16192573 | 16192840 | CSAR_peak_ | 46.7,42.33 -   |
| chr5 | 16192855 | 16193041 | CSAR_peak_ | 7.27,32.27,1-  |
| chr5 | 16193301 | 16193679 | CSAR_peak_ | 32.66,42.94,-  |
| chr5 | 16193772 | 16193917 | CSAR_peak_ | 28.62,49.16 -  |
| chr5 | 16193923 | 16194213 | CSAR_peak_ | 42.59,40.66,-  |
| chr5 | 16194337 | 16194427 | CSAR_peak_ | 33.75,27.11 -  |
| chr5 | 16194513 | 16194603 | CSAR_peak_ | 57.27,42.87,-  |
| chr5 | 16194684 | 16194743 | CSAR_peak_ | 7.36,10.18 -   |
| chr5 | 16194822 | 16194932 | CSAR_peak_ | 37.55,17.82 -  |
| chr5 | 16195482 | 16195523 | CSAR_peak_ | 7.27 -         |
| chr5 | 16378922 | 16379060 | CSAR_peak_ | 8.39,7.27,31.- |
| chr5 | 16380452 | 16380519 | CSAR_peak_ | 10.83 -        |
| chr5 | 16380972 | 16381026 | CSAR_peak_ | 9.58,7.27 -    |
| chr5 | 16381087 | 16381139 | CSAR_peak_ | 12.13 -        |
| chr5 | 16381841 | 16381924 | CSAR_peak_ | 7.58,7.27 -    |
| chr5 | 16382057 | 16382103 | CSAR_peak_ | 12.13 -        |
| chr5 | 16382142 | 16382243 | CSAR_peak_ | 24.17,31.2 -   |
| chr5 | 16382455 | 16382497 | CSAR_peak_ | 7.27 -         |
| chr5 | 16382927 | 16382984 | CSAR_peak_ | 9.58 -         |
| chr5 | 16383081 | 16383120 | CSAR_peak_ | 6.21 -         |
| chr5 | 16383128 | 16383231 | CSAR_peak_ | 8.39,12.17 -   |
| chr5 | 16383308 | 16383453 | CSAR_peak_ | 9.58,12.13 -   |
| chr5 | 16383506 | 16383569 | CSAR_peak_ | 8.65 -         |
| chr5 | 16383821 | 16383859 | CSAR_peak_ | 12.74 -        |
| chr5 | 16383930 | 16383993 | CSAR_peak_ | 23.49,17.82 -  |
| chr5 | 16384097 | 16384160 | CSAR_peak_ | 10.02,25.91 -  |
| chr5 | 16384821 | 16384865 | CSAR_peak_ | 12.17,9.58 -   |
| chr5 | 16384956 | 16385029 | CSAR_peak_ | 33.38,15.68 -  |
| chr5 | 16475563 | 16475654 | CSAR_peak_ | 11.38,10.83 -  |
| chr5 | 16475751 | 16475816 | CSAR_peak_ | 14.88 -        |
| chr5 | 16493133 | 16493174 | CSAR_peak_ | 7.27 -         |
| chr5 | 16494667 | 16494785 | CSAR_peak_ | 14.76 -        |
| chr5 | 16495789 | 16495835 | CSAR_peak_ | 12.13 -        |
| chr5 | 16498400 | 16498478 | CSAR_peak_ | 7.27 -         |
| chr5 | 16534224 | 16534323 | CSAR_peak_ | 6.21,8.39 -    |
| chr5 | 16535485 | 16535622 | CSAR_peak_ | 17.82,20.94,-  |
| chr5 | 16535742 | 16535842 | CSAR_peak_ | 17.82,9.58 -   |
| chr5 | 16536487 | 16536578 | CSAR_peak_ | 10.83,35.24 -  |
| chr5 | 16536634 | 16536720 | CSAR_peak_ | 6.03,9.97 -    |

|      |          |          |             |             |   |
|------|----------|----------|-------------|-------------|---|
| chr5 | 16538306 | 16538409 | CSAR_peak_  | 9.03        | - |
| chr5 | 16538874 | 16538935 | CSAR_peak_  | 8.39,9.58   | - |
| chr5 | 16539427 | 16539461 | CSAR_peak_  | 7.27        | - |
| chr5 | 16539734 | 16539814 | CSAR_peak_  | 9.77,21.35  | - |
| chr5 | 16541932 | 16541982 | CSAR_peak_  | 12.13       | - |
| chr5 | 16542205 | 16542257 | CSAR_peak_  | 9.58,9.58   | - |
| chr5 | 16609390 | 16609433 | CSAR_peak_! | 7           | - |
| chr5 | 16609820 | 16609884 | CSAR_peak_! | 5.86        | - |
| chr5 | 16610017 | 16610082 | CSAR_peak_  | 7.27        | - |
| chr5 | 16614269 | 16614276 | CSAR_peak_  | 10.83,7.27  | - |
| chr5 | 16614373 | 16614419 | CSAR_peak_  | 18.73,9.77  | - |
| chr5 | 16627177 | 16627224 | CSAR_peak_  | 6.21        | - |
| chr5 | 16627715 | 16627767 | CSAR_peak_  | 7.58        | - |
| chr5 | 16629833 | 16629892 | CSAR_peak_  | 14.88       | - |
| chr5 | 16630090 | 16630150 | CSAR_peak_  | 6.21        | - |
| chr5 | 16632413 | 16632544 | CSAR_peak_  | 10.02,19.36 | - |
| chr5 | 16632892 | 16632927 | CSAR_peak_  | 6.21        | - |
| chr5 | 16632994 | 16633137 | CSAR_peak_  | 16.33,14.88 | - |
| chr5 | 16633705 | 16633822 | CSAR_peak_  | 7.58,8.65   | - |
| chr5 | 16633827 | 16633903 | CSAR_peak_  | 9.27        | - |
| chr5 | 16759838 | 16759852 | CSAR_peak_  | 7.27        | - |
| chr5 | 16759933 | 16759970 | CSAR_peak_  | 7.27        | - |
| chr5 | 16795812 | 16795856 | CSAR_peak_  | 7.27        | - |
| chr5 | 16796305 | 16796362 | CSAR_peak_  | 6.21,13.48  | - |
| chr5 | 16796437 | 16796493 | CSAR_peak_  | 8.39        | - |
| chr5 | 16797473 | 16797524 | CSAR_peak_  | 7.27        | - |
| chr5 | 16807865 | 16807927 | CSAR_peak_  | 12.59,8.39  | - |
| chr5 | 16807933 | 16807985 | CSAR_peak_  | 17.37       | - |
| chr5 | 16808015 | 16808064 | CSAR_peak_  | 8.14        | - |
| chr5 | 16808450 | 16808504 | CSAR_peak_  | 7.92        | - |
| chr5 | 16808536 | 16808591 | CSAR_peak_  | 6.03        | - |
| chr5 | 16808882 | 16809012 | CSAR_peak_  | 7.27,7.27   | - |
| chr5 | 16809572 | 16809660 | CSAR_peak_  | 7.58,6.21   | - |
| chr5 | 16809761 | 16809795 | CSAR_peak_  | 13.85       | - |
| chr5 | 16809866 | 16809917 | CSAR_peak_  | 15.96,7.92  | - |
| chr5 | 16811514 | 16811660 | CSAR_peak_  | 9.72,14.85  | - |
| chr5 | 16811955 | 16812000 | CSAR_peak_  | 14.88       | - |
| chr5 | 16812002 | 16812057 | CSAR_peak_  | 7.27        | - |
| chr5 | 16812112 | 16812197 | CSAR_peak_  | 7.27,8.39   | - |
| chr5 | 16812203 | 16812339 | CSAR_peak_  | 25.91,11.38 | - |
| chr5 | 16812417 | 16812450 | CSAR_peak_  | 7.27        | - |
| chr5 | 16812457 | 16812565 | CSAR_peak_  | 13.44,9.77  | - |



|      |          |          |            |                |   |
|------|----------|----------|------------|----------------|---|
| chr5 | 16812609 | 16812737 | CSAR_peak_ | 27.17,6.85     | - |
| chr5 | 16812777 | 16812871 | CSAR_peak_ | 19.21,6.03,21  | - |
| chr5 | 16818795 | 16818845 | CSAR_peak_ | 7.27           | - |
| chr5 | 16820755 | 16820790 | CSAR_peak_ | 8.39           | - |
| chr5 | 16820875 | 16820901 | CSAR_peak_ | 9.58           | - |
| chr5 | 16821019 | 16821068 | CSAR_peak_ | 5.86           | - |
| chr5 | 16821298 | 16821317 | CSAR_peak_ | 6.21           | - |
| chr5 | 16821720 | 16821796 | CSAR_peak_ | 10.83          | - |
| chr5 | 16821938 | 16821988 | CSAR_peak_ | 9.58           | - |
| chr5 | 16822074 | 16822209 | CSAR_peak_ | 40.66,29       | - |
| chr5 | 16822838 | 16822903 | CSAR_peak_ | 25.62,9.58     | - |
| chr5 | 16822998 | 16823036 | CSAR_peak_ | 13.48,7.27     | - |
| chr5 | 16823449 | 16823496 | CSAR_peak_ | 9.77,7.27      | - |
| chr5 | 16823617 | 16823633 | CSAR_peak_ | 14.88          | - |
| chr5 | 16823773 | 16823843 | CSAR_peak_ | 12.13,7.58     | - |
| chr5 | 16824026 | 16824041 | CSAR_peak_ | 6.95           | - |
| chr5 | 16824408 | 16824437 | CSAR_peak_ | 6.21           | - |
| chr5 | 16829161 | 16829216 | CSAR_peak_ | 7.27           | - |
| chr5 | 16854490 | 16854548 | CSAR_peak_ | 6.21           | - |
| chr5 | 16912567 | 16912630 | CSAR_peak_ | 13.85          | - |
| chr5 | 16912823 | 16912882 | CSAR_peak_ | 16.33          | - |
| chr5 | 16912999 | 16913052 | CSAR_peak_ | 17.82          | - |
| chr5 | 16913346 | 16913530 | CSAR_peak_ | 10.13,32.83,,- | - |
| chr5 | 16913678 | 16913893 | CSAR_peak_ | 27.61,21.11    | - |
| chr5 | 16918756 | 16918829 | CSAR_peak_ | 9.58           | - |
| chr5 | 16919899 | 16919930 | CSAR_peak_ | 9.58           | - |
| chr5 | 16920016 | 16920072 | CSAR_peak_ | 9.58,6.03      | - |
| chr5 | 16920155 | 16920220 | CSAR_peak_ | 8.14,10.94     | - |
| chr5 | 16920652 | 16920712 | CSAR_peak_ | 12.13          | - |
| chr5 | 16954456 | 16954525 | CSAR_peak_ | 8.39           | - |
| chr5 | 16954733 | 16954813 | CSAR_peak_ | 6.03           | - |
| chr5 | 16955147 | 16955187 | CSAR_peak_ | 10.02          | - |
| chr5 | 16955929 | 16955983 | CSAR_peak_ | 7.27           | - |
| chr5 | 16956125 | 16956182 | CSAR_peak_ | 9.58,7.27      | - |
| chr5 | 16956906 | 16957026 | CSAR_peak_ | 8.39,14.88     | - |
| chr5 | 16957120 | 16957177 | CSAR_peak_ | 7.27           | - |
| chr5 | 16957339 | 16957402 | CSAR_peak_ | 7.27           | - |
| chr5 | 16958380 | 16958422 | CSAR_peak_ | 6.21           | - |
| chr5 | 16958756 | 16958811 | CSAR_peak_ | 7.27           | - |
| chr5 | 16975695 | 16975783 | CSAR_peak_ | 56.59,10.96,,- | - |
| chr5 | 17021420 | 17021936 | CSAR_peak_ | 20.54,12.94,,- | - |
| chr5 | 17021942 | 17022062 | CSAR_peak_ | 17.82,28.94    | - |

|      |          |          |            |                   |   |
|------|----------|----------|------------|-------------------|---|
| chr5 | 17022235 | 17022429 | CSAR_peak_ | 25.91,18.73       | - |
| chr5 | 17022470 | 17022531 | CSAR_peak_ | 13.48,7.58        | - |
| chr5 | 17097745 | 17097838 | CSAR_peak_ | 10.94             | - |
| chr5 | 17097852 | 17097894 | CSAR_peak_ | 8.95              | - |
| chr5 | 17097941 | 17097992 | CSAR_peak_ | 6.03              | - |
| chr5 | 17098049 | 17098097 | CSAR_peak_ | 8.65,13.44        | - |
| chr5 | 17098139 | 17098201 | CSAR_peak_ | 16.33,8.39        | - |
| chr5 | 17098233 | 17098336 | CSAR_peak_ | 18.73,12.13       | - |
| chr5 | 17099107 | 17099174 | CSAR_peak_ | 16.33             | - |
| chr5 | 17099287 | 17099324 | CSAR_peak_ | 6.21              | - |
| chr5 | 17103477 | 17103532 | CSAR_peak_ | 8.39              | - |
| chr5 | 17104325 | 17104384 | CSAR_peak_ | 6.21              | - |
| chr5 | 17105215 | 17105285 | CSAR_peak_ | 7.58,10.83        | - |
| chr5 | 17118886 | 17118943 | CSAR_peak_ | 7.27              | - |
| chr5 | 17149950 | 17150026 | CSAR_peak_ | 6.81,7.27         | - |
| chr5 | 17170447 | 17170519 | CSAR_peak_ | 9.58              | - |
| chr5 | 17170791 | 17170861 | CSAR_peak_ | 10.83             | - |
| chr5 | 17185619 | 17185669 | CSAR_peak_ | 7.27              | - |
| chr5 | 17185921 | 17185967 | CSAR_peak_ | 9.58              | - |
| chr5 | 17186224 | 17186303 | CSAR_peak_ | 8.39,7.27         | - |
| chr5 | 17186337 | 17186351 | CSAR_peak_ | 6.21              | - |
| chr5 | 17187128 | 17187218 | CSAR_peak_ | 7.27,25.07        | - |
| chr5 | 17187312 | 17187451 | CSAR_peak_ | 12.13,13.48       | - |
| chr5 | 17187997 | 17188060 | CSAR_peak_ | 12.13             | - |
| chr5 | 17188248 | 17188300 | CSAR_peak_ | 7.92              | - |
| chr5 | 17188517 | 17188632 | CSAR_peak_ | 20.94,6.21        | - |
| chr5 | 17188755 | 17188849 | CSAR_peak_ | 10.31,12.59,6.21  | - |
| chr5 | 17188991 | 17189047 | CSAR_peak_ | 6.21              | - |
| chr5 | 17189128 | 17189270 | CSAR_peak_ | 9.58,5.86,6.81    | - |
| chr5 | 17189364 | 17189426 | CSAR_peak_ | 12.17,7.27        | - |
| chr5 | 17197821 | 17197885 | CSAR_peak_ | 7.58              | - |
| chr5 | 17198313 | 17198610 | CSAR_peak_ | 9.58,10.82,14.76  | - |
| chr5 | 17198669 | 17198745 | CSAR_peak_ | 6.51,19.93,7.27   | - |
| chr5 | 17198782 | 17199048 | CSAR_peak_ | 22.58,27.06,14.76 | - |
| chr5 | 17199067 | 17199277 | CSAR_peak_ | 14.76,14.76,10.31 | - |
| chr5 | 17199283 | 17199331 | CSAR_peak_ | 17.82,10.83       | - |
| chr5 | 17199636 | 17199708 | CSAR_peak_ | 9.58              | - |
| chr5 | 17216746 | 17216771 | CSAR_peak_ | 8.39              | - |
| chr5 | 17216780 | 17216842 | CSAR_peak_ | 12.13             | - |
| chr5 | 17216888 | 17216923 | CSAR_peak_ | 10.31             | - |
| chr5 | 17216980 | 17217050 | CSAR_peak_ | 23.71,22.56       | - |
| chr5 | 17217117 | 17217154 | CSAR_peak_ | 5.92,12.93        | - |

|      |          |          |            |              |   |
|------|----------|----------|------------|--------------|---|
| chr5 | 17217168 | 17217216 | CSAR_peak_ | 12.13        | - |
| chr5 | 17217920 | 17218005 | CSAR_peak_ | 19.36,16.05  | - |
| chr5 | 17218234 | 17218295 | CSAR_peak_ | 12.13        | - |
| chr5 | 17218832 | 17218912 | CSAR_peak_ | 63.81,21.94  | - |
| chr5 | 17237665 | 17237698 | CSAR_peak_ | 6.44         | - |
| chr5 | 17237845 | 17237906 | CSAR_peak_ | 9.77         | - |
| chr5 | 17239865 | 17239955 | CSAR_peak_ | 9.61,9.77    | - |
| chr5 | 17244248 | 17244310 | CSAR_peak_ | 6.03,9.77    | - |
| chr5 | 17248600 | 17248647 | CSAR_peak_ | 13.48        | - |
| chr5 | 17269809 | 17269896 | CSAR_peak_ | 13.48        | - |
| chr5 | 17270293 | 17270405 | CSAR_peak_ | 12.28,23.03  | - |
| chr5 | 17270732 | 17270767 | CSAR_peak_ | 7.27         | - |
| chr5 | 17270892 | 17270966 | CSAR_peak_ | 10.83,8.28   | - |
| chr5 | 17271343 | 17271388 | CSAR_peak_ | 9.58,8.39    | - |
| chr5 | 17271640 | 17271702 | CSAR_peak_ | 10.62,14.85  | - |
| chr5 | 17271926 | 17271988 | CSAR_peak_ | 8.39         | - |
| chr5 | 17315713 | 17315727 | CSAR_peak_ | 7.27         | - |
| chr5 | 17316474 | 17316536 | CSAR_peak_ | 17.82        | - |
| chr5 | 17316613 | 17316643 | CSAR_peak_ | 12.13        | - |
| chr5 | 17319437 | 17319505 | CSAR_peak_ | 19.36,7.27   | - |
| chr5 | 17336955 | 17337003 | CSAR_peak_ | 9.58         | - |
| chr5 | 17356899 | 17356941 | CSAR_peak_ | 6.21         | - |
| chr5 | 17357211 | 17357268 | CSAR_peak_ | 8.39         | - |
| chr5 | 17357784 | 17357867 | CSAR_peak_ | 9.58         | - |
| chr5 | 17357926 | 17357999 | CSAR_peak_ | 10.83        | - |
| chr5 | 17360918 | 17361175 | CSAR_peak_ | 33.38,57.21  | - |
| chr5 | 17361309 | 17361413 | CSAR_peak_ | 7.27,7,29.4  | - |
| chr5 | 17361500 | 17361553 | CSAR_peak_ | 12.74,22.56  | - |
| chr5 | 17361701 | 17361814 | CSAR_peak_ | 25.62,11.38  | - |
| chr5 | 17362014 | 17362055 | CSAR_peak_ | 8.39         | - |
| chr5 | 17380211 | 17380307 | CSAR_peak_ | 24.21,7.27   | - |
| chr5 | 17380319 | 17380408 | CSAR_peak_ | 9.58,20.94   | - |
| chr5 | 17380767 | 17380892 | CSAR_peak_ | 18.65        | - |
| chr5 | 17382319 | 17382424 | CSAR_peak_ | 13.51,16.33  | - |
| chr5 | 17382527 | 17382580 | CSAR_peak_ | 6.03         | - |
| chr5 | 17383259 | 17383315 | CSAR_peak_ | 10.95        | - |
| chr5 | 17383520 | 17383616 | CSAR_peak_ | 17.82,14.88  | - |
| chr5 | 17384095 | 17384124 | CSAR_peak_ | 9.58         | - |
| chr5 | 17384199 | 17384320 | CSAR_peak_ | 16.33,8.39,1 | - |
| chr5 | 17386399 | 17386486 | CSAR_peak_ | 11.03,8.65,4 | - |
| chr5 | 17386517 | 17386648 | CSAR_peak_ | 16.54,8.14,7 | - |
| chr5 | 17386923 | 17386987 | CSAR_peak_ | 8.28,13.44,6 | - |

|      |          |          |            |                |   |
|------|----------|----------|------------|----------------|---|
| chr5 | 17387083 | 17387169 | CSAR_peak_ | 31.19          | - |
| chr5 | 17387262 | 17387301 | CSAR_peak_ | 13.51,6.44     | - |
| chr5 | 17387364 | 17387405 | CSAR_peak_ | 14.88,6.95     | - |
| chr5 | 17387471 | 17387575 | CSAR_peak_ | 35.24,13.44    | - |
| chr5 | 17387659 | 17387723 | CSAR_peak_ | 6.03,12.31     | - |
| chr5 | 17387823 | 17387877 | CSAR_peak_ | 31.2           | - |
| chr5 | 17387983 | 17388054 | CSAR_peak_ | 25.91,7.58,1   | - |
| chr5 | 17388192 | 17388289 | CSAR_peak_ | 21.22,14.88    | - |
| chr5 | 17388363 | 17388460 | CSAR_peak_ | 8.39,11.14     | - |
| chr5 | 17388495 | 17388512 | CSAR_peak_ | 7.27,6.21      | - |
| chr5 | 17388769 | 17388800 | CSAR_peak_ | 17.28,16.54    | - |
| chr5 | 17388866 | 17388916 | CSAR_peak_ | 13.29,25.12    | - |
| chr5 | 17388999 | 17389107 | CSAR_peak_ | 21.56          | - |
| chr5 | 17389148 | 17389200 | CSAR_peak_ | 7.27           | - |
| chr5 | 17455346 | 17455506 | CSAR_peak_ | 22.56,9.77     | - |
| chr5 | 17455527 | 17455632 | CSAR_peak_ | 7,24.21,17.3!  | - |
| chr5 | 17455687 | 17455759 | CSAR_peak_ | 6.21           | - |
| chr5 | 17455958 | 17456038 | CSAR_peak_ | 42.64,30.81    | - |
| chr5 | 17456085 | 17456108 | CSAR_peak_ | 6.21,13.48     | - |
| chr5 | 17463187 | 17463291 | CSAR_peak_ | 8.14,8.65,12.- | - |
| chr5 | 17464418 | 17464535 | CSAR_peak_ | 14.88,6.21     | - |
| chr5 | 17464764 | 17464833 | CSAR_peak_ | 14.76          | - |
| chr5 | 17465506 | 17465583 | CSAR_peak_ | 8.39           | - |
| chr5 | 17465782 | 17465871 | CSAR_peak_ | 12.17          | - |
| chr5 | 17466500 | 17466623 | CSAR_peak_ | 33.03,13.44    | - |
| chr5 | 17555220 | 17555308 | CSAR_peak_ | 15,12.13       | - |
| chr5 | 17569844 | 17569892 | CSAR_peak_ | 6.57,5.86      | - |
| chr5 | 17570807 | 17570832 | CSAR_peak_ | 7.27           | - |
| chr5 | 17589175 | 17589239 | CSAR_peak_ | 6.81           | - |
| chr5 | 17590031 | 17590159 | CSAR_peak_ | 6.95,14.88,1(- | - |
| chr5 | 17622774 | 17622797 | CSAR_peak_ | 6.95           | - |
| chr5 | 17623003 | 17623142 | CSAR_peak_ | 9.61,5.86,7.2- | - |
| chr5 | 17623156 | 17623412 | CSAR_peak_ | 19.36,16.54,(- | - |
| chr5 | 17623518 | 17623623 | CSAR_peak_ | 16.11,16.33    | - |
| chr5 | 17623735 | 17623889 | CSAR_peak_ | 27.64,9.41     | - |
| chr5 | 17624050 | 17624114 | CSAR_peak_ | 9.58,8.39      | - |
| chr5 | 17628487 | 17628602 | CSAR_peak_ | 20.94,6.95     | - |
| chr5 | 17628798 | 17628809 | CSAR_peak_ | 8.09           | - |
| chr5 | 17640074 | 17640121 | CSAR_peak_ | 9.41           | - |
| chr5 | 17642733 | 17642860 | CSAR_peak_ | 12.13,8.65     | - |
| chr5 | 17656729 | 17656773 | CSAR_peak_ | 9.58           | - |
| chr5 | 17657513 | 17657606 | CSAR_peak_ | 9.61,26.55     | - |

|      |          |          |            |               |   |
|------|----------|----------|------------|---------------|---|
| chr5 | 17657695 | 17657757 | CSAR_peak_ | 10.95,19.36   | - |
| chr5 | 17658086 | 17658175 | CSAR_peak_ | 8.65,13.6,5.8 | - |
| chr5 | 17658238 | 17658313 | CSAR_peak_ | 7.27,14.88    | - |
| chr5 | 17658571 | 17658620 | CSAR_peak_ | 7.27          | - |
| chr5 | 17659194 | 17659250 | CSAR_peak_ | 17.28         | - |
| chr5 | 17659431 | 17659551 | CSAR_peak_ | 25.91,13.66   | - |
| chr5 | 17659684 | 17659747 | CSAR_peak_ | 33.03,17.82   | - |
| chr5 | 17659851 | 17659896 | CSAR_peak_ | 20.94,13.66   | - |
| chr5 | 17659985 | 17660065 | CSAR_peak_ | 27.64,23.95   | - |
| chr5 | 17660186 | 17660275 | CSAR_peak_ | 9.58,6.03     | - |
| chr5 | 17660304 | 17660326 | CSAR_peak_ | 13.48         | - |
| chr5 | 17660440 | 17660698 | CSAR_peak_ | 37.55,7,16.0  | - |
| chr5 | 17660814 | 17660911 | CSAR_peak_ | 15.64,39.47   | - |
| chr5 | 17661111 | 17661155 | CSAR_peak_ | 7.27,12.17    | - |
| chr5 | 17661314 | 17661376 | CSAR_peak_ | 33.47,17.82   | - |
| chr5 | 17661385 | 17661450 | CSAR_peak_ | 9.77          | - |
| chr5 | 17661469 | 17661478 | CSAR_peak_ | 6.21          | - |
| chr5 | 17661637 | 17661826 | CSAR_peak_ | 14.88,9.58    | - |
| chr5 | 17661911 | 17661963 | CSAR_peak_ | 10.83         | - |
| chr5 | 17662040 | 17662085 | CSAR_peak_ | 7.27,9.58     | - |
| chr5 | 17662233 | 17662372 | CSAR_peak_ | 14.88,7.58    | - |
| chr5 | 17662566 | 17662631 | CSAR_peak_ | 9.58,6.21     | - |
| chr5 | 17662748 | 17662798 | CSAR_peak_ | 10.83         | - |
| chr5 | 17663013 | 17663066 | CSAR_peak_ | 17.82,7.27    | - |
| chr5 | 17663300 | 17663382 | CSAR_peak_ | 13.48         | - |
| chr5 | 17663410 | 17663460 | CSAR_peak_ | 7.27          | - |
| chr5 | 17663906 | 17663942 | CSAR_peak_ | 7.27          | - |
| chr5 | 17664430 | 17664471 | CSAR_peak_ | 9.58          | - |
| chr5 | 17664579 | 17664751 | CSAR_peak_ | 35.24,8.13,1  | - |
| chr5 | 17664876 | 17664902 | CSAR_peak_ | 12.17         | - |
| chr5 | 17664942 | 17665036 | CSAR_peak_ | 27.77         | - |
| chr5 | 17665112 | 17665171 | CSAR_peak_ | 14.88,9.58    | - |
| chr5 | 17665461 | 17665628 | CSAR_peak_ | 12.31,9.61,6. | - |
| chr5 | 17665730 | 17665779 | CSAR_peak_ | 13.48,9.77    | - |
| chr5 | 17666014 | 17666066 | CSAR_peak_ | 14.88         | - |
| chr5 | 17666205 | 17666262 | CSAR_peak_ | 7.27,7.27     | - |
| chr5 | 17666651 | 17666699 | CSAR_peak_ | 6.21          | - |
| chr5 | 17689627 | 17689703 | CSAR_peak_ | 17.82         | - |
| chr5 | 17690040 | 17690069 | CSAR_peak_ | 7.27          | - |
| chr5 | 17705381 | 17705488 | CSAR_peak_ | 6.03,8.39     | - |
| chr5 | 17743259 | 17743283 | CSAR_peak_ | 6.03          | - |
| chr5 | 17743358 | 17743405 | CSAR_peak_ | 8.39          | - |

|      |          |          |             |                |   |
|------|----------|----------|-------------|----------------|---|
| chr5 | 17744436 | 17744495 | CSAR_peak_! | 6.57           | - |
| chr5 | 17744743 | 17744785 | CSAR_peak_! | 7.34           | - |
| chr5 | 17745138 | 17745212 | CSAR_peak_! | 9.58           | - |
| chr5 | 17745586 | 17745638 | CSAR_peak_! | 11.28,14.88    | - |
| chr5 | 17745819 | 17745902 | CSAR_peak_! | 8.39,22.56     | - |
| chr5 | 17746353 | 17746396 | CSAR_peak_! | 19.36,9.97     | - |
| chr5 | 17746603 | 17746661 | CSAR_peak_! | 9.58,6.02      | - |
| chr5 | 17747645 | 17747702 | CSAR_peak_! | 10.83          | - |
| chr5 | 17747834 | 17747935 | CSAR_peak_! | 7.92           | - |
| chr5 | 17749845 | 17749911 | CSAR_peak_! | 7.27,17.82     | - |
| chr5 | 17749941 | 17749979 | CSAR_peak_! | 7.27           | - |
| chr5 | 17750079 | 17750143 | CSAR_peak_! | 16.08,19.36    | - |
| chr5 | 17750235 | 17750284 | CSAR_peak_! | 13.44,14.76    | - |
| chr5 | 17750557 | 17750604 | CSAR_peak_! | 5.86           | - |
| chr5 | 17750708 | 17750746 | CSAR_peak_! | 24.21          | - |
| chr5 | 17750818 | 17750882 | CSAR_peak_! | 17.82          | - |
| chr5 | 17750967 | 17751029 | CSAR_peak_! | 13.48          | - |
| chr5 | 17751136 | 17751207 | CSAR_peak_! | 8.39,16.33     | - |
| chr5 | 17751298 | 17751410 | CSAR_peak_! | 6.57,16.33     | - |
| chr5 | 17751837 | 17751852 | CSAR_peak_! | 7.27,6.21      | - |
| chr5 | 17752074 | 17752115 | CSAR_peak_! | 14.85,8.39     | - |
| chr5 | 17752210 | 17752259 | CSAR_peak_! | 6.57,6.81      | - |
| chr5 | 17802103 | 17802137 | CSAR_peak_! | 16.11          | - |
| chr5 | 17802242 | 17802339 | CSAR_peak_! | 13.51          | - |
| chr5 | 17802861 | 17802952 | CSAR_peak_! | 10.02          | - |
| chr5 | 17803247 | 17803334 | CSAR_peak_! | 6.57           | - |
| chr5 | 17823860 | 17823911 | CSAR_peak_! | 7.27           | - |
| chr5 | 17824238 | 17824298 | CSAR_peak_! | 9.58           | - |
| chr5 | 17824445 | 17824495 | CSAR_peak_! | 7.27,16.33     | - |
| chr5 | 17825009 | 17825045 | CSAR_peak_! | 7.27           | - |
| chr5 | 17825563 | 17825613 | CSAR_peak_! | 7.27           | - |
| chr5 | 17830885 | 17830977 | CSAR_peak_! | 7.27           | - |
| chr5 | 17839920 | 17839990 | CSAR_peak_! | 7.27,7.58      | - |
| chr5 | 17840585 | 17840652 | CSAR_peak_! | 14.76,7.27     | - |
| chr5 | 17840718 | 17840908 | CSAR_peak_! | 16.54,9.61     | - |
| chr5 | 17840977 | 17841229 | CSAR_peak_! | 34.16,25.07,;- | - |
| chr5 | 17841239 | 17841314 | CSAR_peak_! | 9.58,14.88     | - |
| chr5 | 17841330 | 17841542 | CSAR_peak_! | 25.91,22.85    | - |
| chr5 | 17841567 | 17841801 | CSAR_peak_! | 18.1,10.82,3!  | - |
| chr5 | 17841825 | 17841904 | CSAR_peak_! | 24.52,14.85    | - |
| chr5 | 17841981 | 17842055 | CSAR_peak_! | 16.92,26.62    | - |
| chr5 | 17842110 | 17842208 | CSAR_peak_! | 17.82,6.57     | - |

|      |          |          |            |               |   |
|------|----------|----------|------------|---------------|---|
| chr5 | 17842227 | 17842311 | CSAR_peak_ | 25.91,12.13   | - |
| chr5 | 17842387 | 17842393 | CSAR_peak_ | 6.21          | - |
| chr5 | 17842403 | 17842457 | CSAR_peak_ | 9.58,7.27     | - |
| chr5 | 17842524 | 17842831 | CSAR_peak_ | 24.21,33.03,  | - |
| chr5 | 17842916 | 17843370 | CSAR_peak_ | 48.73,9.55,10 | - |
| chr5 | 17843401 | 17843544 | CSAR_peak_ | 14.34,37.12   | - |
| chr5 | 17858707 | 17858782 | CSAR_peak_ | 10.83,8.39    | - |
| chr5 | 17859392 | 17859444 | CSAR_peak_ | 19.36         | - |
| chr5 | 17859483 | 17859596 | CSAR_peak_ | 27.77,9.32    | - |
| chr5 | 17859686 | 17859939 | CSAR_peak_ | 14.34,10.95,  | - |
| chr5 | 17860221 | 17860283 | CSAR_peak_ | 7.58          | - |
| chr5 | 17860501 | 17860698 | CSAR_peak_ | 5.86,31.2,12. | - |
| chr5 | 17879009 | 17879073 | CSAR_peak_ | 12.17         | - |
| chr5 | 17879568 | 17879627 | CSAR_peak_ | 6.57          | - |
| chr5 | 17930527 | 17930573 | CSAR_peak_ | 7.27          | - |
| chr5 | 17931923 | 17931937 | CSAR_peak_ | 7.58,8.39     | - |
| chr5 | 17932054 | 17932104 | CSAR_peak_ | 17.82,13.44   | - |
| chr5 | 17932438 | 17932495 | CSAR_peak_ | 7.27          | - |
| chr5 | 17933638 | 17933677 | CSAR_peak_ | 6.21          | - |
| chr5 | 17934799 | 17934854 | CSAR_peak_ | 12.13,12.13   | - |
| chr5 | 17935483 | 17935574 | CSAR_peak_ | 7.58          | - |
| chr5 | 17942266 | 17942343 | CSAR_peak_ | 11.66,13.48   | - |
| chr5 | 18046009 | 18046074 | CSAR_peak_ | 13.48,14.88   | - |
| chr5 | 18046510 | 18046541 | CSAR_peak_ | 7.27          | - |
| chr5 | 18048328 | 18048370 | CSAR_peak_ | 9.58          | - |
| chr5 | 18076121 | 18076191 | CSAR_peak_ | 12.13         | - |
| chr5 | 18076288 | 18076342 | CSAR_peak_ | 14.92,9.58    | - |
| chr5 | 18076503 | 18076553 | CSAR_peak_ | 20.13,9.72    | - |
| chr5 | 18076578 | 18076612 | CSAR_peak_ | 6.21          | - |
| chr5 | 18076645 | 18076761 | CSAR_peak_ | 14.88,13.51   | - |
| chr5 | 18076909 | 18076974 | CSAR_peak_ | 12.17         | - |
| chr5 | 18077143 | 18077298 | CSAR_peak_ | 14.76,12.13   | - |
| chr5 | 18077428 | 18077492 | CSAR_peak_ | 17.82         | - |
| chr5 | 18077577 | 18077636 | CSAR_peak_ | 9.58,14.76    | - |
| chr5 | 18078031 | 18078070 | CSAR_peak_ | 9.58          | - |
| chr5 | 18078266 | 18078368 | CSAR_peak_ | 22.56,9.03    | - |
| chr5 | 18078500 | 18078635 | CSAR_peak_ | 16.33,7.27    | - |
| chr5 | 18078929 | 18079024 | CSAR_peak_ | 14.76         | - |
| chr5 | 18079031 | 18079097 | CSAR_peak_ | 17.82         | - |
| chr5 | 18079107 | 18079150 | CSAR_peak_ | 14.88         | - |
| chr5 | 18079166 | 18079235 | CSAR_peak_ | 7.58          | - |
| chr5 | 18079286 | 18079403 | CSAR_peak_ | 15.96,15.96   | - |

|      |          |          |            |                  |   |
|------|----------|----------|------------|------------------|---|
| chr5 | 18079611 | 18079692 | CSAR_peak_ | 10.83,7.58       | - |
| chr5 | 18086132 | 18086220 | CSAR_peak_ | 13.48            | - |
| chr5 | 18086627 | 18086697 | CSAR_peak_ | 19.96,7.27       | - |
| chr5 | 18086793 | 18086844 | CSAR_peak_ | 9.77,6.21        | - |
| chr5 | 18087027 | 18087191 | CSAR_peak_ | 12.31,9.27       | - |
| chr5 | 18087421 | 18087472 | CSAR_peak_ | 14.88            | - |
| chr5 | 18087605 | 18087679 | CSAR_peak_ | 8.39             | - |
| chr5 | 18089625 | 18089723 | CSAR_peak_ | 14.88,7.58       | - |
| chr5 | 18089765 | 18089912 | CSAR_peak_ | 9.58,11.66       | - |
| chr5 | 18091115 | 18091206 | CSAR_peak_ | 10.31,24.21      | - |
| chr5 | 18092104 | 18092179 | CSAR_peak_ | 13.48            | - |
| chr5 | 18140738 | 18140804 | CSAR_peak_ | 10.02,7.27       | - |
| chr5 | 18175776 | 18175824 | CSAR_peak_ | 6.21             | - |
| chr5 | 18180083 | 18180130 | CSAR_peak_ | 7.27,6.21        | - |
| chr5 | 18181025 | 18181108 | CSAR_peak_ | 12.17,12.31      | - |
| chr5 | 18181458 | 18181563 | CSAR_peak_ | 9.77             | - |
| chr5 | 18278023 | 18278262 | CSAR_peak_ | 14.76,9.58,1.72  | - |
| chr5 | 18278332 | 18278396 | CSAR_peak_ | 9.58             | - |
| chr5 | 18278465 | 18278570 | CSAR_peak_ | 8.14,17.37       | - |
| chr5 | 18278716 | 18278749 | CSAR_peak_ | 9.58             | - |
| chr5 | 18278879 | 18278934 | CSAR_peak_ | 9.58             | - |
| chr5 | 18279020 | 18279071 | CSAR_peak_ | 6.21             | - |
| chr5 | 18279522 | 18279567 | CSAR_peak_ | 6.21             | - |
| chr5 | 18280507 | 18280539 | CSAR_peak_ | 7.27,7.27        | - |
| chr5 | 18280583 | 18280635 | CSAR_peak_ | 12.13            | - |
| chr5 | 18321904 | 18321987 | CSAR_peak_ | 7.27             | - |
| chr5 | 18368641 | 18368685 | CSAR_peak_ | 6.21             | - |
| chr5 | 18368757 | 18368819 | CSAR_peak_ | 9.27,17.82       | - |
| chr5 | 18368958 | 18369025 | CSAR_peak_ | 18.95,14.88      | - |
| chr5 | 18369035 | 18369099 | CSAR_peak_ | 13.72            | - |
| chr5 | 18369164 | 18369254 | CSAR_peak_ | 33.03,7.34       | - |
| chr5 | 18369257 | 18369322 | CSAR_peak_ | 7.58,9.77        | - |
| chr5 | 18369326 | 18369395 | CSAR_peak_ | 20.52,34.53      | - |
| chr5 | 18369444 | 18369606 | CSAR_peak_ | 43.08,6.57,5.4   | - |
| chr5 | 18369614 | 18369839 | CSAR_peak_ | 40.66,25.62,1.72 | - |
| chr5 | 18369841 | 18369932 | CSAR_peak_ | 7.26,12.14       | - |
| chr5 | 18370003 | 18370083 | CSAR_peak_ | 7.58             | - |
| chr5 | 18370133 | 18370180 | CSAR_peak_ | 6.81             | - |
| chr5 | 18370285 | 18370327 | CSAR_peak_ | 12.31            | - |
| chr5 | 18370476 | 18370626 | CSAR_peak_ | 20.21,11.83      | - |
| chr5 | 18370710 | 18370803 | CSAR_peak_ | 33.03,19.98      | - |
| chr5 | 18381614 | 18381693 | CSAR_peak_ | 7.92,17.82       | - |



|      |          |          |            |                |   |
|------|----------|----------|------------|----------------|---|
| chr5 | 18381967 | 18382100 | CSAR_peak_ | 25.91,21.37    | - |
| chr5 | 18382101 | 18382170 | CSAR_peak_ | 14.25,8.34     | - |
| chr5 | 18382212 | 18382298 | CSAR_peak_ | 31.2,10.31     | - |
| chr5 | 18382340 | 18382398 | CSAR_peak_ | 10.94,8.14,8.- |   |
| chr5 | 18382412 | 18382533 | CSAR_peak_ | 20.43,31.2     | - |
| chr5 | 18382565 | 18382593 | CSAR_peak_ | 6.21           | - |
| chr5 | 18382850 | 18382969 | CSAR_peak_ | 24.52,8.65,8.- |   |
| chr5 | 18383037 | 18383206 | CSAR_peak_ | 8.39,18.73     | - |
| chr5 | 18383260 | 18383581 | CSAR_peak_ | 17.82,12.13,(- |   |
| chr5 | 18383645 | 18383680 | CSAR_peak_ | 9.58,9.77      | - |
| chr5 | 18384780 | 18384831 | CSAR_peak_ | 9.58           | - |
| chr5 | 18386157 | 18386255 | CSAR_peak_ | 8.39           | - |
| chr5 | 18402647 | 18402715 | CSAR_peak_ | 12.17          | - |
| chr5 | 18405894 | 18405913 | CSAR_peak_ | 6.21           | - |
| chr5 | 18405995 | 18406018 | CSAR_peak_ | 7.27           | - |
| chr5 | 18434936 | 18434987 | CSAR_peak_ | 10.02          | - |
| chr5 | 18496464 | 18496552 | CSAR_peak_ | 9.58,7.27      | - |
| chr5 | 18496633 | 18496679 | CSAR_peak_ | 8.39           | - |
| chr5 | 18496760 | 18496821 | CSAR_peak_ | 10.83          | - |
| chr5 | 18496885 | 18496940 | CSAR_peak_ | 9.58,7.27      | - |
| chr5 | 18498296 | 18498330 | CSAR_peak_ | 6.21           | - |
| chr5 | 18498477 | 18498539 | CSAR_peak_ | 8.28           | - |
| chr5 | 18505377 | 18505425 | CSAR_peak_ | 8.39           | - |
| chr5 | 18505557 | 18505596 | CSAR_peak_ | 6.21           | - |
| chr5 | 18505952 | 18506042 | CSAR_peak_ | 28.34,24.21    | - |
| chr5 | 18506077 | 18506188 | CSAR_peak_ | 14.88,6.03,7.- |   |
| chr5 | 18557338 | 18557387 | CSAR_peak_ | 6.21           | - |
| chr5 | 18587091 | 18587154 | CSAR_peak_ | 12.13          | - |
| chr5 | 18587165 | 18587274 | CSAR_peak_ | 8.39           | - |
| chr5 | 18587320 | 18587388 | CSAR_peak_ | 8.14           | - |
| chr5 | 18587811 | 18587982 | CSAR_peak_ | 37.55,12.13    | - |
| chr5 | 18588218 | 18588317 | CSAR_peak_ | 17.82,16.33    | - |
| chr5 | 18588336 | 18588405 | CSAR_peak_ | 10.83,12.13    | - |
| chr5 | 18663371 | 18663423 | CSAR_peak_ | 6.44           | - |
| chr5 | 18663693 | 18663748 | CSAR_peak_ | 7.27,13.48     | - |
| chr5 | 18663863 | 18663890 | CSAR_peak_ | 7.27           | - |
| chr5 | 18701869 | 18701928 | CSAR_peak_ | 28.34          | - |
| chr5 | 18709021 | 18709139 | CSAR_peak_ | 9.58,7.92      | - |
| chr5 | 18709300 | 18709363 | CSAR_peak_ | 6.57,10.83     | - |
| chr5 | 18714332 | 18714379 | CSAR_peak_ | 6.21           | - |
| chr5 | 18715611 | 18715694 | CSAR_peak_ | 6.21           | - |
| chr5 | 18715732 | 18715826 | CSAR_peak_ | 7.27           | - |

|      |          |          |            |               |   |
|------|----------|----------|------------|---------------|---|
| chr5 | 18719698 | 18719821 | CSAR_peak_ | 9.77          | - |
| chr5 | 18719970 | 18720038 | CSAR_peak_ | 6.21,7        | - |
| chr5 | 18721964 | 18722012 | CSAR_peak_ | 12.13         | - |
| chr5 | 18722288 | 18722345 | CSAR_peak_ | 7.27          | - |
| chr5 | 18723458 | 18723520 | CSAR_peak_ | 6.21          | - |
| chr5 | 18723714 | 18723778 | CSAR_peak_ | 8.14          | - |
| chr5 | 18724201 | 18724304 | CSAR_peak_ | 7.92,12.13    | - |
| chr5 | 18724395 | 18724449 | CSAR_peak_ | 6.21,13.48    | - |
| chr5 | 18724543 | 18724582 | CSAR_peak_ | 9.58          | - |
| chr5 | 18731602 | 18731707 | CSAR_peak_ | 9.61,9.58     | - |
| chr5 | 18731910 | 18731955 | CSAR_peak_ | 18.73         | - |
| chr5 | 18732080 | 18732161 | CSAR_peak_ | 15,10.83      | - |
| chr5 | 18732284 | 18732364 | CSAR_peak_ | 8.65,8.52,8.2 | - |
| chr5 | 18732537 | 18732588 | CSAR_peak_ | 13.48,16.33   | - |
| chr5 | 18733087 | 18733130 | CSAR_peak_ | 7.27          | - |
| chr5 | 18733184 | 18733194 | CSAR_peak_ | 7.27          | - |
| chr5 | 18733442 | 18733470 | CSAR_peak_ | 6.21          | - |
| chr5 | 18733883 | 18733939 | CSAR_peak_ | 6.57          | - |
| chr5 | 18734431 | 18734534 | CSAR_peak_ | 10.53,7.58    | - |
| chr5 | 18734710 | 18734781 | CSAR_peak_ | 9.58,9.58     | - |
| chr5 | 18734915 | 18734995 | CSAR_peak_ | 7.78,16.54    | - |
| chr5 | 18735010 | 18735088 | CSAR_peak_ | 12.13         | - |
| chr5 | 18735490 | 18735558 | CSAR_peak_ | 21.94         | - |
| chr5 | 18735686 | 18735726 | CSAR_peak_ | 6.21          | - |
| chr5 | 18764932 | 18764978 | CSAR_peak_ | 6.21          | - |
| chr5 | 18767537 | 18767578 | CSAR_peak_ | 6.21          | - |
| chr5 | 18768277 | 18768298 | CSAR_peak_ | 7.27          | - |
| chr5 | 18768384 | 18768443 | CSAR_peak_ | 12.13         | - |
| chr5 | 18770359 | 18770444 | CSAR_peak_ | 7.27          | - |
| chr5 | 18774460 | 18774507 | CSAR_peak_ | 7.27          | - |
| chr5 | 18797288 | 18797321 | CSAR_peak_ | 5.86          | - |
| chr5 | 18797430 | 18797467 | CSAR_peak_ | 6.21          | - |
| chr5 | 18884777 | 18884862 | CSAR_peak_ | 12.23,8.28    | - |
| chr5 | 18917977 | 18918038 | CSAR_peak_ | 9.58          | - |
| chr5 | 18918952 | 18919008 | CSAR_peak_ | 12.13,7.58    | - |
| chr5 | 18952795 | 18952859 | CSAR_peak_ | 5.86,8.39     | - |
| chr5 | 18952935 | 18953081 | CSAR_peak_ | 12.13,9.58    | - |
| chr5 | 18953392 | 18953447 | CSAR_peak_ | 6.21          | - |
| chr5 | 18953528 | 18953580 | CSAR_peak_ | 8.39          | - |
| chr5 | 18953595 | 18953671 | CSAR_peak_ | 17.82         | - |
| chr5 | 18953703 | 18953770 | CSAR_peak_ | 7.27,12.31    | - |
| chr5 | 18954159 | 18954210 | CSAR_peak_ | 6.21          | - |

|      |          |          |            |                |   |
|------|----------|----------|------------|----------------|---|
| chr5 | 18954422 | 18954503 | CSAR_peak_ | 14.92,29.4     | - |
| chr5 | 18984271 | 18984340 | CSAR_peak_ | 9.58           | - |
| chr5 | 18984349 | 18984416 | CSAR_peak_ | 7.27           | - |
| chr5 | 19012738 | 19012837 | CSAR_peak_ | 9.58,7.73      | - |
| chr5 | 19012950 | 19012985 | CSAR_peak_ | 9.27           | - |
| chr5 | 19013278 | 19013328 | CSAR_peak_ | 6.21           | - |
| chr5 | 19013444 | 19013508 | CSAR_peak_ | 9.77,6.03      | - |
| chr5 | 19013628 | 19013697 | CSAR_peak_ | 7.27           | - |
| chr5 | 19091399 | 19091465 | CSAR_peak_ | 19.36          | - |
| chr5 | 19091514 | 19091656 | CSAR_peak_ | 7.27,8.39      | - |
| chr5 | 19091667 | 19091729 | CSAR_peak_ | 12.17          | - |
| chr5 | 19091733 | 19091793 | CSAR_peak_ | 12.13,9.58     | - |
| chr5 | 19092215 | 19092263 | CSAR_peak_ | 23.49,12.17    | - |
| chr5 | 19092312 | 19092424 | CSAR_peak_ | 13.51,14.88    | - |
| chr5 | 19092703 | 19092918 | CSAR_peak_ | 16.33,31.2,1(- | - |
| chr5 | 19093191 | 19093235 | CSAR_peak_ | 7.27           | - |
| chr5 | 19093266 | 19093499 | CSAR_peak_ | 9.79,9.72,35.- | - |
| chr5 | 19093584 | 19094038 | CSAR_peak_ | 61.11,70.15,;- | - |
| chr5 | 19094092 | 19094508 | CSAR_peak_ | 44.49,16.78,;- | - |
| chr5 | 19094518 | 19094659 | CSAR_peak_ | 25.12,12.17,;- | - |
| chr5 | 19094827 | 19094876 | CSAR_peak_ | 13.29          | - |
| chr5 | 19094944 | 19094999 | CSAR_peak_ | 17.4,25.62     | - |
| chr5 | 19095112 | 19095243 | CSAR_peak_ | 28.62,14.85,;- | - |
| chr5 | 19095299 | 19095348 | CSAR_peak_ | 7.27,6.21      | - |
| chr5 | 19095377 | 19095711 | CSAR_peak_ | 33.31,7.73,8.- | - |
| chr5 | 19095718 | 19096038 | CSAR_peak_ | 14.63,23.8,2;- | - |
| chr5 | 19096086 | 19096267 | CSAR_peak_ | 23.43,6.96,3;- | - |
| chr5 | 19096284 | 19096307 | CSAR_peak_ | 20.43          | - |
| chr5 | 19096346 | 19096479 | CSAR_peak_ | 33.03,54.96    | - |
| chr5 | 19096522 | 19096665 | CSAR_peak_ | 30.35,12.13,;- | - |
| chr5 | 19096668 | 19096873 | CSAR_peak_ | 7.85,29.69,6.- | - |
| chr5 | 19096930 | 19097012 | CSAR_peak_ | 12.17,20.05    | - |
| chr5 | 19097204 | 19097389 | CSAR_peak_ | 16.34,17.82,;- | - |
| chr5 | 19097426 | 19097542 | CSAR_peak_ | 6.21,8.39      | - |
| chr5 | 19097620 | 19097734 | CSAR_peak_ | 44.23,18.84    | - |
| chr5 | 19097822 | 19097858 | CSAR_peak_ | 15.76          | - |
| chr5 | 19097979 | 19098426 | CSAR_peak_ | 52.07,8.65,3;- | - |
| chr5 | 19098564 | 19098708 | CSAR_peak_ | 36.5,17.82     | - |
| chr5 | 19119101 | 19119161 | CSAR_peak_ | 14.88          | - |
| chr5 | 19119616 | 19119667 | CSAR_peak_ | 7.27           | - |
| chr5 | 19124903 | 19124954 | CSAR_peak_ | 7.34           | - |
| chr5 | 19125286 | 19125356 | CSAR_peak_ | 13.48,22.56    | - |

|      |          |          |            |               |   |
|------|----------|----------|------------|---------------|---|
| chr5 | 19125516 | 19125620 | CSAR_peak_ | 10.17,9.58    | - |
| chr5 | 19125673 | 19125733 | CSAR_peak_ | 7.27          | - |
| chr5 | 19126342 | 19126421 | CSAR_peak_ | 7.27,7.58     | - |
| chr5 | 19130248 | 19130298 | CSAR_peak_ | 6.21,8.39     | - |
| chr5 | 19134854 | 19134992 | CSAR_peak_ | 7.29,8.39,6.2 | - |
| chr5 | 19161412 | 19161492 | CSAR_peak_ | 9.41          | - |
| chr5 | 19161659 | 19161748 | CSAR_peak_ | 5.62,7.27,6.2 | - |
| chr5 | 19162164 | 19162230 | CSAR_peak_ | 17.51,9.27    | - |
| chr5 | 19163233 | 19163283 | CSAR_peak_ | 9.58,7.27     | - |
| chr5 | 19163668 | 19163714 | CSAR_peak_ | 6.21          | - |
| chr5 | 19165358 | 19165374 | CSAR_peak_ | 7.58          | - |
| chr5 | 19165719 | 19165769 | CSAR_peak_ | 7.27          | - |
| chr5 | 19167337 | 19167402 | CSAR_peak_ | 8.39          | - |
| chr5 | 19168054 | 19168168 | CSAR_peak_ | 7.27          | - |
| chr5 | 19168706 | 19168852 | CSAR_peak_ | 7.27          | - |
| chr5 | 19169302 | 19169417 | CSAR_peak_ | 10.02,6.21,7. | - |
| chr5 | 19169480 | 19169555 | CSAR_peak_ | 17.65,5.9,21. | - |
| chr5 | 19169619 | 19169690 | CSAR_peak_ | 9.77,9.77     | - |
| chr5 | 19169871 | 19169981 | CSAR_peak_ | 14.12,8.92,6. | - |
| chr5 | 19169993 | 19170038 | CSAR_peak_ | 7.92          | - |
| chr5 | 19170102 | 19170106 | CSAR_peak_ | 7.27          | - |
| chr5 | 19170159 | 19170210 | CSAR_peak_ | 11.44,7.27,5. | - |
| chr5 | 19170263 | 19170346 | CSAR_peak_ | 16.55,35.7    | - |
| chr5 | 19170415 | 19170483 | CSAR_peak_ | 42.64,6.03    | - |
| chr5 | 19170973 | 19171050 | CSAR_peak_ | 9.58,7.58     | - |
| chr5 | 19171274 | 19171379 | CSAR_peak_ | 22.56         | - |
| chr5 | 19171453 | 19171525 | CSAR_peak_ | 10.83         | - |
| chr5 | 19171555 | 19171609 | CSAR_peak_ | 8.39          | - |
| chr5 | 19171719 | 19171768 | CSAR_peak_ | 22.56         | - |
| chr5 | 19171967 | 19172040 | CSAR_peak_ | 9.58,7.27     | - |
| chr5 | 19172052 | 19172288 | CSAR_peak_ | 6.32,11.39,1. | - |
| chr5 | 19172377 | 19172425 | CSAR_peak_ | 6.11          | - |
| chr5 | 19172444 | 19172663 | CSAR_peak_ | 19.98,27.67,. | - |
| chr5 | 19172690 | 19172775 | CSAR_peak_ | 9.61,19.98    | - |
| chr5 | 19216716 | 19216792 | CSAR_peak_ | 8.39,7.27     | - |
| chr5 | 19216888 | 19216926 | CSAR_peak_ | 6.81          | - |
| chr5 | 19217227 | 19217332 | CSAR_peak_ | 5.86,9.58     | - |
| chr5 | 19236253 | 19236400 | CSAR_peak_ | 10.02,25.91   | - |
| chr5 | 19236423 | 19236507 | CSAR_peak_ | 6.44,12.17    | - |
| chr5 | 19236967 | 19237005 | CSAR_peak_ | 6.21          | - |
| chr5 | 19237132 | 19237306 | CSAR_peak_ | 10.64,12.72,. | - |
| chr5 | 19237395 | 19237445 | CSAR_peak_ | 7.92          | - |

|      |          |          |            |                   |   |
|------|----------|----------|------------|-------------------|---|
| chr5 | 19237780 | 19237820 | CSAR_peak_ | 13.51             | - |
| chr5 | 19238000 | 19238154 | CSAR_peak_ | 9.61,10.83,11.13  | - |
| chr5 | 19238275 | 19238303 | CSAR_peak_ | 7.27              | - |
| chr5 | 19238383 | 19238469 | CSAR_peak_ | 26.06             | - |
| chr5 | 19238643 | 19238795 | CSAR_peak_ | 12.74,15.68       | - |
| chr5 | 19238894 | 19238939 | CSAR_peak_ | 25.34,11.45       | - |
| chr5 | 19239147 | 19239185 | CSAR_peak_ | 6.21              | - |
| chr5 | 19239421 | 19239435 | CSAR_peak_ | 10.02             | - |
| chr5 | 19239524 | 19239613 | CSAR_peak_ | 16.77,11.66,11.13 | - |
| chr5 | 19239642 | 19239694 | CSAR_peak_ | 14.88             | - |
| chr5 | 19239797 | 19239879 | CSAR_peak_ | 14.88             | - |
| chr5 | 19239885 | 19239933 | CSAR_peak_ | 5.86              | - |
| chr5 | 19240068 | 19240149 | CSAR_peak_ | 14.88,10.94       | - |
| chr5 | 19240809 | 19241057 | CSAR_peak_ | 19.36,19.36,11.13 | - |
| chr5 | 19283764 | 19283818 | CSAR_peak_ | 10.02             | - |
| chr5 | 19286643 | 19286813 | CSAR_peak_ | 10.83,13.48       | - |
| chr5 | 19287871 | 19287920 | CSAR_peak_ | 7.58              | - |
| chr5 | 19288045 | 19288141 | CSAR_peak_ | 13.51,16.33       | - |
| chr5 | 19288377 | 19288493 | CSAR_peak_ | 27.64,26.69       | - |
| chr5 | 19288510 | 19288558 | CSAR_peak_ | 10.02             | - |
| chr5 | 19288575 | 19288625 | CSAR_peak_ | 12.13,6.95        | - |
| chr5 | 19288635 | 19288687 | CSAR_peak_ | 9.58              | - |
| chr5 | 19288732 | 19288787 | CSAR_peak_ | 10.83             | - |
| chr5 | 19288843 | 19288925 | CSAR_peak_ | 10.95,12.17       | - |
| chr5 | 19289000 | 19289090 | CSAR_peak_ | 8.39              | - |
| chr5 | 19289103 | 19289167 | CSAR_peak_ | 7.27,16.33        | - |
| chr5 | 19289756 | 19289813 | CSAR_peak_ | 6.57              | - |
| chr5 | 19289901 | 19289906 | CSAR_peak_ | 7.27              | - |
| chr5 | 19290127 | 19290186 | CSAR_peak_ | 12.13             | - |
| chr5 | 19294265 | 19294281 | CSAR_peak_ | 6.95              | - |
| chr5 | 19294367 | 19294450 | CSAR_peak_ | 7.27              | - |
| chr5 | 19294621 | 19294682 | CSAR_peak_ | 9.58              | - |
| chr5 | 19302659 | 19302700 | CSAR_peak_ | 7.27,7.27         | - |
| chr5 | 19311542 | 19311599 | CSAR_peak_ | 6.21              | - |
| chr5 | 19328694 | 19328728 | CSAR_peak_ | 6.21              | - |
| chr5 | 19334654 | 19334711 | CSAR_peak_ | 10.83             | - |
| chr5 | 19334753 | 19334803 | CSAR_peak_ | 6.21              | - |
| chr5 | 19336448 | 19336485 | CSAR_peak_ | 9.58              | - |
| chr5 | 19343574 | 19343623 | CSAR_peak_ | 6.21              | - |
| chr5 | 19343783 | 19343833 | CSAR_peak_ | 7.27              | - |
| chr5 | 19344071 | 19344108 | CSAR_peak_ | 9.58              | - |
| chr5 | 19344282 | 19344305 | CSAR_peak_ | 6.03              | - |

|      |          |          |            |                |   |
|------|----------|----------|------------|----------------|---|
| chr5 | 19386333 | 19386370 | CSAR_peak_ | 6.21           | - |
| chr5 | 19386923 | 19387026 | CSAR_peak_ | 6.95           | - |
| chr5 | 19387803 | 19387855 | CSAR_peak_ | 12.13,9.58     | - |
| chr5 | 19411082 | 19411141 | CSAR_peak_ | 8.39           | - |
| chr5 | 19444688 | 19444713 | CSAR_peak_ | 12.13          | - |
| chr5 | 19444818 | 19444937 | CSAR_peak_ | 14.34,17.35    | - |
| chr5 | 19445934 | 19445983 | CSAR_peak_ | 9.77           | - |
| chr5 | 19445985 | 19446076 | CSAR_peak_ | 7.27,5.86      | - |
| chr5 | 19446134 | 19446222 | CSAR_peak_ | 28.34,7.27     | - |
| chr5 | 19446227 | 19446278 | CSAR_peak_ | 7.27           | - |
| chr5 | 19446357 | 19446459 | CSAR_peak_ | 9.58           | - |
| chr5 | 19446640 | 19446698 | CSAR_peak_ | 38.71,10.83    | - |
| chr5 | 19446762 | 19446817 | CSAR_peak_ | 9.77           | - |
| chr5 | 19501402 | 19501451 | CSAR_peak_ | 6.44           | - |
| chr5 | 19501589 | 19501645 | CSAR_peak_ | 12.13          | - |
| chr5 | 19501750 | 19501775 | CSAR_peak_ | 9.58           | - |
| chr5 | 19502292 | 19502334 | CSAR_peak_ | 6.81           | - |
| chr5 | 19502377 | 19502415 | CSAR_peak_ | 9.58           | - |
| chr5 | 19503053 | 19503116 | CSAR_peak_ | 8.39           | - |
| chr5 | 19503443 | 19503562 | CSAR_peak_ | 34.89,14.88    | - |
| chr5 | 19503803 | 19503862 | CSAR_peak_ | 6.21           | - |
| chr5 | 19508507 | 19508558 | CSAR_peak_ | 6.21           | - |
| chr5 | 19514431 | 19514475 | CSAR_peak_ | 9.58           | - |
| chr5 | 19527921 | 19527960 | CSAR_peak_ | 6.21           | - |
| chr5 | 19528219 | 19528332 | CSAR_peak_ | 9.58,10.7      | - |
| chr5 | 19528334 | 19528497 | CSAR_peak_ | 12.74,6.21,6.  | - |
| chr5 | 19528544 | 19528663 | CSAR_peak_ | 19.96,31.73    | - |
| chr5 | 19528725 | 19528733 | CSAR_peak_ | 7.58,9.58      | - |
| chr5 | 19528747 | 19528999 | CSAR_peak_ | 8.13,27.64,2(- | - |
| chr5 | 19529459 | 19529548 | CSAR_peak_ | 8.28,16.11     | - |
| chr5 | 19529554 | 19529633 | CSAR_peak_ | 19.36,12.13    | - |
| chr5 | 19541397 | 19541476 | CSAR_peak_ | 6.45           | - |
| chr5 | 19541492 | 19541555 | CSAR_peak_ | 5.86,8.95      | - |
| chr5 | 19541598 | 19541738 | CSAR_peak_ | 28.96,5.86,1(- | - |
| chr5 | 19541759 | 19541886 | CSAR_peak_ | 6.81,12.13,1(- | - |
| chr5 | 19542210 | 19542234 | CSAR_peak_ | 7.27           | - |
| chr5 | 19542320 | 19542379 | CSAR_peak_ | 10.83,17.82    | - |
| chr5 | 19553389 | 19553436 | CSAR_peak_ | 7.27           | - |
| chr5 | 19561599 | 19561700 | CSAR_peak_ | 13.92,7.58     | - |
| chr5 | 19561727 | 19561861 | CSAR_peak_ | 15.2,9.94,12.- | - |
| chr5 | 19561899 | 19562015 | CSAR_peak_ | 8.14,17.82,8.- | - |
| chr5 | 19562150 | 19562242 | CSAR_peak_ | 32.27,25.91    | - |

|      |          |          |            |                |
|------|----------|----------|------------|----------------|
| chr5 | 19562337 | 19562558 | CSAR_peak_ | 16.33,34.31,-  |
| chr5 | 19562592 | 19562856 | CSAR_peak_ | 8.65,14.88,2,- |
| chr5 | 19562859 | 19563162 | CSAR_peak_ | 12.5,29.4,17.- |
| chr5 | 19563370 | 19563446 | CSAR_peak_ | 12.13 -        |
| chr5 | 19563571 | 19563639 | CSAR_peak_ | 8.39 -         |
| chr5 | 19604770 | 19604925 | CSAR_peak_ | 8.2,9.58,12.1- |
| chr5 | 19605185 | 19605257 | CSAR_peak_ | 22.56,9.58 -   |
| chr5 | 19605393 | 19605417 | CSAR_peak_ | 6.21 -         |
| chr5 | 19605465 | 19605597 | CSAR_peak_ | 13.51,19.36 -  |
| chr5 | 19605693 | 19605784 | CSAR_peak_ | 7.27,13.48 -   |
| chr5 | 19630957 | 19631022 | CSAR_peak_ | 8.14 -         |
| chr5 | 19632042 | 19632073 | CSAR_peak_ | 6.21 -         |
| chr5 | 19632123 | 19632188 | CSAR_peak_ | 7.27 -         |
| chr5 | 19632675 | 19632728 | CSAR_peak_ | 9.58 -         |
| chr5 | 19633412 | 19633476 | CSAR_peak_ | 12.13,7.92 -   |
| chr5 | 19633822 | 19633865 | CSAR_peak_ | 8.39,6.21 -    |
| chr5 | 19667289 | 19667381 | CSAR_peak_ | 14.63,12.31 -  |
| chr5 | 19667884 | 19667944 | CSAR_peak_ | 6.87 -         |
| chr5 | 19668358 | 19668388 | CSAR_peak_ | 9.58 -         |
| chr5 | 19669532 | 19669595 | CSAR_peak_ | 7.27 -         |
| chr5 | 19722565 | 19722601 | CSAR_peak_ | 7.27 -         |
| chr5 | 19723038 | 19723079 | CSAR_peak_ | 8.39 -         |
| chr5 | 19731885 | 19732001 | CSAR_peak_ | 6.21,7.27 -    |
| chr5 | 19732114 | 19732170 | CSAR_peak_ | 7.27 -         |
| chr5 | 19732461 | 19732488 | CSAR_peak_ | 6.44 -         |
| chr5 | 19780653 | 19780697 | CSAR_peak_ | 6.21 -         |
| chr5 | 19780947 | 19781015 | CSAR_peak_ | 10.83 -        |
| chr5 | 19781263 | 19781308 | CSAR_peak_ | 9.58 -         |
| chr5 | 19789462 | 19789518 | CSAR_peak_ | 6.87 -         |
| chr5 | 19790089 | 19790142 | CSAR_peak_ | 18.95 -        |
| chr5 | 19801294 | 19801362 | CSAR_peak_ | 7.27 -         |
| chr5 | 19816406 | 19816498 | CSAR_peak_ | 7.73 -         |
| chr5 | 19837140 | 19837252 | CSAR_peak_ | 12.13,6.95 -   |
| chr5 | 19837820 | 19837887 | CSAR_peak_ | 7.92 -         |
| chr5 | 19881452 | 19881505 | CSAR_peak_ | 14.88 -        |
| chr5 | 19885607 | 19885745 | CSAR_peak_ | 9.48,35.31,9.- |
| chr5 | 19885954 | 19886017 | CSAR_peak_ | 20.04,17.12,-  |
| chr5 | 19886051 | 19886074 | CSAR_peak_ | 13.86,13.08 -  |
| chr5 | 19975795 | 19975856 | CSAR_peak_ | 7.27 -         |
| chr5 | 19976076 | 19976133 | CSAR_peak_ | 6.21,14.88 -   |
| chr5 | 19976509 | 19976548 | CSAR_peak_ | 6.21 -         |
| chr5 | 19976787 | 19976872 | CSAR_peak_ | 22.56,17.28 -  |

|      |          |          |             |                |   |
|------|----------|----------|-------------|----------------|---|
| chr5 | 19977186 | 19977239 | CSAR_peak_  | 9.58           | - |
| chr5 | 20007507 | 20007681 | CSAR_peak_  | 17.82,20.43    | - |
| chr5 | 20008054 | 20008141 | CSAR_peak_  | 17.82,10.83    | - |
| chr5 | 20009370 | 20009438 | CSAR_peak_  | 6.21           | - |
| chr5 | 20009841 | 20009890 | CSAR_peak_  | 13.44          | - |
| chr5 | 20009900 | 20009941 | CSAR_peak_  | 12.17,9.58     | - |
| chr5 | 20009989 | 20010118 | CSAR_peak_  | 29.14,20.54,   | - |
| chr5 | 20010186 | 20010272 | CSAR_peak_  | 9.78,16.33     | - |
| chr5 | 20010380 | 20010479 | CSAR_peak_  | 6.21,27.73,1(- | - |
| chr5 | 20010484 | 20010536 | CSAR_peak_! | 6.57           | - |
| chr5 | 20010555 | 20010906 | CSAR_peak_  | 19.45,21.37,   | - |
| chr5 | 20011498 | 20011589 | CSAR_peak_  | 13.44,6.1      | - |
| chr5 | 20011637 | 20011686 | CSAR_peak_  | 20.94          | - |
| chr5 | 20011969 | 20012007 | CSAR_peak_  | 12.13          | - |
| chr5 | 20012011 | 20012082 | CSAR_peak_  | 22.69,23.03    | - |
| chr5 | 20012141 | 20012182 | CSAR_peak_  | 9.77           | - |
| chr5 | 20012227 | 20012479 | CSAR_peak_  | 27.67,21.56    | - |
| chr5 | 20012608 | 20012818 | CSAR_peak_  | 27.23,27.86,   | - |
| chr5 | 20012841 | 20012957 | CSAR_peak_  | 20.54,19.18,   | - |
| chr5 | 20012959 | 20013056 | CSAR_peak_  | 11.66,7.27     | - |
| chr5 | 20013078 | 20013406 | CSAR_peak_  | 22.54,34.69    | - |
| chr5 | 20013443 | 20013525 | CSAR_peak_  | 17.46,21.76    | - |
| chr5 | 20013538 | 20014188 | CSAR_peak_  | 86.03,8.95,3   | - |
| chr5 | 20014307 | 20014466 | CSAR_peak_  | 17.37,9.58     | - |
| chr5 | 20014546 | 20015058 | CSAR_peak_  | 14.88,50.81,   | - |
| chr5 | 20015112 | 20015194 | CSAR_peak_  | 50.81,19.96    | - |
| chr5 | 20015384 | 20015738 | CSAR_peak_  | 41.89,17.35,   | - |
| chr5 | 20015759 | 20015879 | CSAR_peak_  | 28.62,27.64    | - |
| chr5 | 20015949 | 20016050 | CSAR_peak_  | 24.21          | - |
| chr5 | 20016086 | 20016301 | CSAR_peak_  | 22.38,46.76,   | - |
| chr5 | 20016323 | 20016568 | CSAR_peak_  | 33.22,8.71,2(- | - |
| chr5 | 20016582 | 20016671 | CSAR_peak_  | 10.17,8.3      | - |
| chr5 | 20037620 | 20037671 | CSAR_peak_  | 7.27           | - |
| chr5 | 20038318 | 20038399 | CSAR_peak_  | 6.21           | - |
| chr5 | 20042094 | 20042139 | CSAR_peak_  | 14.76          | - |
| chr5 | 20042237 | 20042252 | CSAR_peak_  | 8.65           | - |
| chr5 | 20044078 | 20044126 | CSAR_peak_  | 8.65           | - |
| chr5 | 20048653 | 20048706 | CSAR_peak_  | 9.77           | - |
| chr5 | 20049506 | 20049556 | CSAR_peak_  | 7.27           | - |
| chr5 | 20104797 | 20104864 | CSAR_peak_  | 24.52,7,9.77   | - |
| chr5 | 20105088 | 20105108 | CSAR_peak_! | 7,8.95         | - |
| chr5 | 20105218 | 20105362 | CSAR_peak_  | 13.92,7.27     | - |



|      |          |          |            |             |   |
|------|----------|----------|------------|-------------|---|
| chr5 | 20105557 | 20105611 | CSAR_peak_ | 6.21,8.39   | - |
| chr5 | 20115643 | 20115692 | CSAR_peak_ | 7.27        | - |
| chr5 | 20123956 | 20124006 | CSAR_peak_ | 12.13       | - |
| chr5 | 20126667 | 20126717 | CSAR_peak_ | 8.39,6.21   | - |
| chr5 | 20146339 | 20146392 | CSAR_peak_ | 7.27        | - |
| chr5 | 20152289 | 20152378 | CSAR_peak_ | 12.31       | - |
| chr5 | 20197674 | 20197781 | CSAR_peak_ | 9.58,10.83  | - |
| chr5 | 20197885 | 20198021 | CSAR_peak_ | 23.49,18.65 | - |
| chr5 | 20198044 | 20198211 | CSAR_peak_ | 25.1,10.83  | - |
| chr5 | 20198334 | 20198454 | CSAR_peak_ | 16.11,16.33 | - |
| chr5 | 20198718 | 20198760 | CSAR_peak_ | 12.17       | - |
| chr5 | 20198863 | 20198929 | CSAR_peak_ | 20.94,18.73 | - |
| chr5 | 20199137 | 20199334 | CSAR_peak_ | 24.17       | - |
| chr5 | 20199407 | 20199460 | CSAR_peak_ | 13.51       | - |
| chr5 | 20199517 | 20199563 | CSAR_peak_ | 7.27,14.88  | - |
| chr5 | 20199591 | 20199737 | CSAR_peak_ | 19.36,18.65 | - |
| chr5 | 20199879 | 20199911 | CSAR_peak_ | 7.27        | - |
| chr5 | 20201806 | 20201892 | CSAR_peak_ | 13.29       | - |
| chr5 | 20201911 | 20201992 | CSAR_peak_ | 9.58        | - |
| chr5 | 20202065 | 20202113 | CSAR_peak_ | 8.39        | - |
| chr5 | 20202468 | 20202537 | CSAR_peak_ | 6.03,10.83  | - |
| chr5 | 20202685 | 20202752 | CSAR_peak_ | 7.58        | - |
| chr5 | 20203099 | 20203151 | CSAR_peak_ | 10.95,12.13 | - |
| chr5 | 20203227 | 20203286 | CSAR_peak_ | 8.39,16.19  | - |
| chr5 | 20206000 | 20206090 | CSAR_peak_ | 13.29       | - |
| chr5 | 20246901 | 20246934 | CSAR_peak_ | 6.21        | - |
| chr5 | 20248187 | 20248228 | CSAR_peak_ | 5.86        | - |
| chr5 | 20248480 | 20248516 | CSAR_peak_ | 7.58        | - |
| chr5 | 20248578 | 20248650 | CSAR_peak_ | 8.14        | - |
| chr5 | 20251091 | 20251133 | CSAR_peak_ | 8.39        | - |
| chr5 | 20251293 | 20251352 | CSAR_peak_ | 6.21        | - |
| chr5 | 20251820 | 20251880 | CSAR_peak_ | 13.48       | - |
| chr5 | 20251997 | 20252053 | CSAR_peak_ | 6.21        | - |
| chr5 | 20291283 | 20291342 | CSAR_peak_ | 6.21        | - |
| chr5 | 20291939 | 20291993 | CSAR_peak_ | 7.27        | - |
| chr5 | 20292088 | 20292169 | CSAR_peak_ | 7.27,6.21   | - |
| chr5 | 20297697 | 20297821 | CSAR_peak_ | 12.13,7.27  | - |
| chr5 | 20298105 | 20298192 | CSAR_peak_ | 17.82       | - |
| chr5 | 20298220 | 20298307 | CSAR_peak_ | 27.94,7.92  | - |
| chr5 | 20298700 | 20298764 | CSAR_peak_ | 7.27        | - |
| chr5 | 20298800 | 20298890 | CSAR_peak_ | 12.13,7.27  | - |
| chr5 | 20299718 | 20299773 | CSAR_peak_ | 6.81        | - |

|      |          |          |            |             |   |
|------|----------|----------|------------|-------------|---|
| chr5 | 20299988 | 20300038 | CSAR_peak_ | 6.57        | - |
| chr5 | 20300165 | 20300212 | CSAR_peak_ | 7.27,10.83  | - |
| chr5 | 20300250 | 20300287 | CSAR_peak_ | 6.57        | - |
| chr5 | 20300797 | 20300922 | CSAR_peak_ | 14.76,9.58  | - |
| chr5 | 20301472 | 20301540 | CSAR_peak_ | 13.66       | - |
| chr5 | 20301625 | 20301714 | CSAR_peak_ | 15.2        | - |
| chr5 | 20308947 | 20308985 | CSAR_peak_ | 6.21        | - |
| chr5 | 20309122 | 20309176 | CSAR_peak_ | 6.21        | - |
| chr5 | 20320104 | 20320183 | CSAR_peak_ | 9.27        | - |
| chr5 | 20321145 | 20321185 | CSAR_peak_ | 7.27        | - |
| chr5 | 20322556 | 20322624 | CSAR_peak_ | 19.36       | - |
| chr5 | 20334303 | 20334366 | CSAR_peak_ | 9.77,10.83  | - |
| chr5 | 20337919 | 20338030 | CSAR_peak_ | 24.21,10.31 | - |
| chr5 | 20338612 | 20338669 | CSAR_peak_ | 6.85        | - |
| chr5 | 20338709 | 20338768 | CSAR_peak_ | 7.27        | - |
| chr5 | 20338883 | 20338925 | CSAR_peak_ | 8.39        | - |
| chr5 | 20339445 | 20339511 | CSAR_peak_ | 10.83       | - |
| chr5 | 20339767 | 20339837 | CSAR_peak_ | 9.77        | - |
| chr5 | 20340146 | 20340174 | CSAR_peak_ | 9.58        | - |
| chr5 | 20340300 | 20340326 | CSAR_peak_ | 7.27        | - |
| chr5 | 20342418 | 20342465 | CSAR_peak_ | 8.39        | - |
| chr5 | 20342940 | 20342990 | CSAR_peak_ | 14.88       | - |
| chr5 | 20343001 | 20343098 | CSAR_peak_ | 25.91,36.78 | - |
| chr5 | 20343472 | 20343605 | CSAR_peak_ | 35.83,16.33 | - |
| chr5 | 20344049 | 20344114 | CSAR_peak_ | 13.48       | - |
| chr5 | 20344930 | 20344969 | CSAR_peak_ | 7.27        | - |
| chr5 | 20405693 | 20405757 | CSAR_peak_ | 7.27        | - |
| chr5 | 20448616 | 20448700 | CSAR_peak_ | 12.13       | - |
| chr5 | 20448878 | 20448958 | CSAR_peak_ | 12.13       | - |
| chr5 | 20449761 | 20449866 | CSAR_peak_ | 12.13,19.36 | - |
| chr5 | 20451389 | 20451457 | CSAR_peak_ | 6.21,6.57   | - |
| chr5 | 20452666 | 20452734 | CSAR_peak_ | 7.27,9.58   | - |
| chr5 | 20452820 | 20452896 | CSAR_peak_ | 7.27,7.92   | - |
| chr5 | 20452913 | 20453025 | CSAR_peak_ | 7.58        | - |
| chr5 | 20453028 | 20453124 | CSAR_peak_ | 7.27        | - |
| chr5 | 20482621 | 20482655 | CSAR_peak_ | 7.27        | - |
| chr5 | 20484654 | 20484748 | CSAR_peak_ | 7.27,9.77   | - |
| chr5 | 20485576 | 20485634 | CSAR_peak_ | 7.27        | - |
| chr5 | 20487230 | 20487269 | CSAR_peak_ | 13.48       | - |
| chr5 | 20517508 | 20517607 | CSAR_peak_ | 7.27        | - |
| chr5 | 20525108 | 20525159 | CSAR_peak_ | 9.58        | - |
| chr5 | 20534194 | 20534235 | CSAR_peak_ | 6.21        | - |

|      |          |          |            |               |   |
|------|----------|----------|------------|---------------|---|
| chr5 | 20534476 | 20534546 | CSAR_peak_ | 25.08         | - |
| chr5 | 20534549 | 20534661 | CSAR_peak_ | 7.27,8.65     | - |
| chr5 | 20534773 | 20534792 | CSAR_peak_ | 6.21          | - |
| chr5 | 20534795 | 20534877 | CSAR_peak_ | 18.97,18.65   | - |
| chr5 | 20535031 | 20535081 | CSAR_peak_ | 13.51,16.11   | - |
| chr5 | 20535150 | 20535194 | CSAR_peak_ | 19.36,13.48   | - |
| chr5 | 20535290 | 20535352 | CSAR_peak_ | 16.33,13.48   | - |
| chr5 | 20535421 | 20535510 | CSAR_peak_ | 8.14,8.39     | - |
| chr5 | 20535596 | 20535675 | CSAR_peak_ | 7.27,17.82    | - |
| chr5 | 20535992 | 20536014 | CSAR_peak_ | 12.13         | - |
| chr5 | 20536017 | 20536076 | CSAR_peak_ | 12.13         | - |
| chr5 | 20536283 | 20536406 | CSAR_peak_ | 15.2,12.59,34 | - |
| chr5 | 20536485 | 20536565 | CSAR_peak_ | 14.88         | - |
| chr5 | 20536853 | 20536952 | CSAR_peak_ | 18.1,19.96    | - |
| chr5 | 20538419 | 20538481 | CSAR_peak_ | 9.58          | - |
| chr5 | 20542833 | 20542913 | CSAR_peak_ | 9.58          | - |
| chr5 | 20543342 | 20543392 | CSAR_peak_ | 12.31,8.39    | - |
| chr5 | 20543498 | 20543526 | CSAR_peak_ | 9.58          | - |
| chr5 | 20543535 | 20543593 | CSAR_peak_ | 13.56,14.12   | - |
| chr5 | 20543662 | 20543791 | CSAR_peak_ | 7.31,12.27,14 | - |
| chr5 | 20543827 | 20543894 | CSAR_peak_ | 8.65,23.03    | - |
| chr5 | 20543923 | 20543964 | CSAR_peak_ | 6.03          | - |
| chr5 | 20544161 | 20544209 | CSAR_peak_ | 7.27,17.82    | - |
| chr5 | 20544216 | 20544410 | CSAR_peak_ | 5.86,39.21,14 | - |
| chr5 | 20544422 | 20544496 | CSAR_peak_ | 24.21,7       | - |
| chr5 | 20544603 | 20544697 | CSAR_peak_ | 8.9,17.82     | - |
| chr5 | 20572003 | 20572093 | CSAR_peak_ | 10.95,6.95    | - |
| chr5 | 20572202 | 20572292 | CSAR_peak_ | 9.58          | - |
| chr5 | 20572373 | 20572427 | CSAR_peak_ | 8.09,10.83    | - |
| chr5 | 20572551 | 20572586 | CSAR_peak_ | 7.27          | - |
| chr5 | 20572817 | 20572858 | CSAR_peak_ | 7.27          | - |
| chr5 | 20573603 | 20573680 | CSAR_peak_ | 7.27,13.51    | - |
| chr5 | 20573865 | 20573922 | CSAR_peak_ | 8.65          | - |
| chr5 | 20574019 | 20574082 | CSAR_peak_ | 6.21,12.59    | - |
| chr5 | 20574158 | 20574239 | CSAR_peak_ | 6.21,6.81     | - |
| chr5 | 20574886 | 20574956 | CSAR_peak_ | 8.28,7.27     | - |
| chr5 | 20582926 | 20583016 | CSAR_peak_ | 10.02,8.92    | - |
| chr5 | 20583159 | 20583220 | CSAR_peak_ | 8.19,8.65     | - |
| chr5 | 20583352 | 20583394 | CSAR_peak_ | 8.39,6.21     | - |
| chr5 | 20583437 | 20583561 | CSAR_peak_ | 12.17         | - |
| chr5 | 20605345 | 20605435 | CSAR_peak_ | 10.95,6.95    | - |
| chr5 | 20605544 | 20605634 | CSAR_peak_ | 9.58          | - |

|      |          |          |            |                |   |
|------|----------|----------|------------|----------------|---|
| chr5 | 20605715 | 20605769 | CSAR_peak_ | 10.83,8.09     | - |
| chr5 | 20605893 | 20605928 | CSAR_peak_ | 7.27           | - |
| chr5 | 20606159 | 20606200 | CSAR_peak_ | 7.27           | - |
| chr5 | 20606945 | 20607022 | CSAR_peak_ | 7.27,13.51     | - |
| chr5 | 20607207 | 20607264 | CSAR_peak_ | 8.65           | - |
| chr5 | 20607361 | 20607424 | CSAR_peak_ | 6.21,12.59     | - |
| chr5 | 20607500 | 20607581 | CSAR_peak_ | 6.21,6.81      | - |
| chr5 | 20608228 | 20608306 | CSAR_peak_ | 9.27,7.27      | - |
| chr5 | 20616268 | 20616358 | CSAR_peak_ | 10.02,8.92     | - |
| chr5 | 20616501 | 20616562 | CSAR_peak_ | 8.19,8.65      | - |
| chr5 | 20616694 | 20616736 | CSAR_peak_ | 8.39,6.21      | - |
| chr5 | 20616779 | 20616903 | CSAR_peak_ | 12.17          | - |
| chr5 | 20696463 | 20696491 | CSAR_peak_ | 6.21           | - |
| chr5 | 20699892 | 20699936 | CSAR_peak_ | 7.27           | - |
| chr5 | 20704895 | 20704945 | CSAR_peak_ | 9.58           | - |
| chr5 | 20705017 | 20705060 | CSAR_peak_ | 7.27           | - |
| chr5 | 20705093 | 20705156 | CSAR_peak_ | 12.13,6.87     | - |
| chr5 | 20705246 | 20705313 | CSAR_peak_ | 17.82          | - |
| chr5 | 20705566 | 20705622 | CSAR_peak_ | 6.21           | - |
| chr5 | 20705641 | 20705746 | CSAR_peak_ | 11.03,7.58,1!  | - |
| chr5 | 20705898 | 20705957 | CSAR_peak_ | 8.65           | - |
| chr5 | 20706031 | 20706127 | CSAR_peak_ | 9.58           | - |
| chr5 | 20706152 | 20706209 | CSAR_peak_ | 10.02          | - |
| chr5 | 20706433 | 20706516 | CSAR_peak_ | 9.58,9.58      | - |
| chr5 | 20715337 | 20715390 | CSAR_peak_ | 13.48,14.88    | - |
| chr5 | 20715769 | 20715966 | CSAR_peak_ | 14.59,19.96    | - |
| chr5 | 20715985 | 20716053 | CSAR_peak_ | 14.85,17.4     | - |
| chr5 | 20716131 | 20716307 | CSAR_peak_ | 17.88,12.76    | - |
| chr5 | 20716598 | 20716665 | CSAR_peak_ | 6.57,6.21      | - |
| chr5 | 20716690 | 20716794 | CSAR_peak_ | 8.95,9.58      | - |
| chr5 | 20716842 | 20716930 | CSAR_peak_ | 11.71,13.29    | - |
| chr5 | 20716968 | 20717090 | CSAR_peak_ | 5.86,16.11,6.- | - |
| chr5 | 20717164 | 20717296 | CSAR_peak_ | 31.2,24.21     | - |
| chr5 | 20717325 | 20717554 | CSAR_peak_ | 14.88,10.94,-  | - |
| chr5 | 20717635 | 20717705 | CSAR_peak_ | 14.76,9.58     | - |
| chr5 | 20717712 | 20717750 | CSAR_peak_ | 14.34          | - |
| chr5 | 20717819 | 20717856 | CSAR_peak_ | 8.9            | - |
| chr5 | 20718071 | 20718131 | CSAR_peak_ | 17.4           | - |
| chr5 | 20718358 | 20718556 | CSAR_peak_ | 19.63,8.39,1!  | - |
| chr5 | 20718587 | 20718807 | CSAR_peak_ | 12.13,22.38,-  | - |
| chr5 | 20718855 | 20718905 | CSAR_peak_ | 6.21,20.43     | - |
| chr5 | 20719227 | 20719274 | CSAR_peak_ | 7.27           | - |

|      |          |          |            |                |   |
|------|----------|----------|------------|----------------|---|
| chr5 | 20719286 | 20719341 | CSAR_peak_ | 12.5           | - |
| chr5 | 20719346 | 20719433 | CSAR_peak_ | 11.63,7.27     | - |
| chr5 | 20719447 | 20719633 | CSAR_peak_ | 17.82,16.33    | - |
| chr5 | 20719642 | 20719751 | CSAR_peak_ | 14.92,15.1     | - |
| chr5 | 20719766 | 20719807 | CSAR_peak_ | 10.12,13.48    | - |
| chr5 | 20720223 | 20720246 | CSAR_peak_ | 8.12           | - |
| chr5 | 20741657 | 20741703 | CSAR_peak_ | 7.27           | - |
| chr5 | 20785728 | 20785770 | CSAR_peak_ | 6.21           | - |
| chr5 | 20785982 | 20786029 | CSAR_peak_ | 7.27,6.21      | - |
| chr5 | 20794641 | 20794694 | CSAR_peak_ | 7.27           | - |
| chr5 | 20844921 | 20844968 | CSAR_peak_ | 8.39           | - |
| chr5 | 20845105 | 20845182 | CSAR_peak_ | 9.58           | - |
| chr5 | 20846686 | 20846734 | CSAR_peak_ | 12.31,6.21     | - |
| chr5 | 20847333 | 20847381 | CSAR_peak_ | 6.21           | - |
| chr5 | 20848087 | 20848159 | CSAR_peak_ | 6.21           | - |
| chr5 | 20849855 | 20849911 | CSAR_peak_ | 7.58           | - |
| chr5 | 20851187 | 20851245 | CSAR_peak_ | 14.88          | - |
| chr5 | 20851749 | 20851817 | CSAR_peak_ | 6.85,7.27      | - |
| chr5 | 20876319 | 20876397 | CSAR_peak_ | 10.83          | - |
| chr5 | 20877813 | 20877876 | CSAR_peak_ | 9.58,6.21      | - |
| chr5 | 20878118 | 20878282 | CSAR_peak_ | 26.69,6.58,8.- | - |
| chr5 | 20878290 | 20878424 | CSAR_peak_ | 35.31,41.52    | - |
| chr5 | 20879281 | 20879349 | CSAR_peak_ | 6.95           | - |
| chr5 | 20879484 | 20879588 | CSAR_peak_ | 12.27,26.06    | - |
| chr5 | 20879879 | 20879968 | CSAR_peak_ | 7.58,12.31     | - |
| chr5 | 20880048 | 20880096 | CSAR_peak_ | 7.27           | - |
| chr5 | 20881343 | 20881399 | CSAR_peak_ | 11.14,10.95    | - |
| chr5 | 20881577 | 20881596 | CSAR_peak_ | 8.39           | - |
| chr5 | 20881692 | 20881754 | CSAR_peak_ | 19.98,14.88    | - |
| chr5 | 20881879 | 20882020 | CSAR_peak_ | 6.81,7.27,23.- | - |
| chr5 | 20882224 | 20882287 | CSAR_peak_ | 10.62,8.2,7.2- | - |
| chr5 | 20882616 | 20882730 | CSAR_peak_ | 5.62,7.58,16.- | - |
| chr5 | 20882798 | 20882817 | CSAR_peak_ | 7.92           | - |
| chr5 | 20882900 | 20882940 | CSAR_peak_ | 12.13,6.44     | - |
| chr5 | 20883162 | 20883191 | CSAR_peak_ | 9.58           | - |
| chr5 | 20883273 | 20883299 | CSAR_peak_ | 7.27           | - |
| chr5 | 20883391 | 20883402 | CSAR_peak_ | 7.27           | - |
| chr5 | 20883535 | 20883578 | CSAR_peak_ | 10.83,12.13    | - |
| chr5 | 20890314 | 20890366 | CSAR_peak_ | 9.58           | - |
| chr5 | 20939982 | 20940044 | CSAR_peak_ | 9.58           | - |
| chr5 | 20940048 | 20940098 | CSAR_peak_ | 6.95           | - |
| chr5 | 20940172 | 20940226 | CSAR_peak_ | 6.21           | - |

|      |          |          |            |                |   |
|------|----------|----------|------------|----------------|---|
| chr5 | 21008085 | 21008136 | CSAR_peak_ | 9.58           | - |
| chr5 | 21008437 | 21008523 | CSAR_peak_ | 14.88          | - |
| chr5 | 21064206 | 21064268 | CSAR_peak_ | 7.27           | - |
| chr5 | 21064478 | 21064511 | CSAR_peak_ | 14.88,9.58     | - |
| chr5 | 21064948 | 21065018 | CSAR_peak_ | 12.13,9.27     | - |
| chr5 | 21065523 | 21065584 | CSAR_peak_ | 7.27,7.58      | - |
| chr5 | 21065835 | 21065897 | CSAR_peak_ | 6.21           | - |
| chr5 | 21066733 | 21066812 | CSAR_peak_ | 13.48,7.27     | - |
| chr5 | 21067132 | 21067185 | CSAR_peak_ | 19.36          | - |
| chr5 | 21067316 | 21067346 | CSAR_peak_ | 7.34           | - |
| chr5 | 21067576 | 21067642 | CSAR_peak_ | 16.33          | - |
| chr5 | 21113631 | 21113799 | CSAR_peak_ | 10.94,15.2,9.  | - |
| chr5 | 21113940 | 21114036 | CSAR_peak_ | 25.91,8.2,31.  | - |
| chr5 | 21114069 | 21114150 | CSAR_peak_ | 10.83          | - |
| chr5 | 21114207 | 21114256 | CSAR_peak_ | 8.39           | - |
| chr5 | 21114296 | 21114327 | CSAR_peak_ | 14.88          | - |
| chr5 | 21114428 | 21114648 | CSAR_peak_ | 18.95,8.95     | - |
| chr5 | 21114667 | 21114809 | CSAR_peak_ | 14.88,16.19    | - |
| chr5 | 21114888 | 21115058 | CSAR_peak_ | 7.27,26.05     | - |
| chr5 | 21115112 | 21115168 | CSAR_peak_ | 8.39,12.17     | - |
| chr5 | 21115257 | 21115323 | CSAR_peak_ | 8.61           | - |
| chr5 | 21115333 | 21115602 | CSAR_peak_ | 31.72,35.83,.- | - |
| chr5 | 21115621 | 21115657 | CSAR_peak_ | 10.96          | - |
| chr5 | 21115690 | 21115741 | CSAR_peak_ | 8.39           | - |
| chr5 | 21115812 | 21115871 | CSAR_peak_ | 9.58,6.1       | - |
| chr5 | 21115872 | 21115987 | CSAR_peak_ | 9.58,13.48     | - |
| chr5 | 21116662 | 21116718 | CSAR_peak_ | 9.58           | - |
| chr5 | 21116736 | 21116778 | CSAR_peak_ | 7.27           | - |
| chr5 | 21116841 | 21116985 | CSAR_peak_ | 25.91,7.27     | - |
| chr5 | 21117029 | 21117229 | CSAR_peak_ | 40.72,44.34    | - |
| chr5 | 21117500 | 21117754 | CSAR_peak_ | 7.36,24.52,19. | - |
| chr5 | 21119046 | 21119192 | CSAR_peak_ | 7.58,8.39      | - |
| chr5 | 21121734 | 21121804 | CSAR_peak_ | 5.86           | - |
| chr5 | 21121901 | 21122094 | CSAR_peak_ | 19.36,9.58     | - |
| chr5 | 21122111 | 21122166 | CSAR_peak_ | 9.32           | - |
| chr5 | 21122486 | 21122606 | CSAR_peak_ | 10.83          | - |
| chr5 | 21122649 | 21122688 | CSAR_peak_ | 6.21           | - |
| chr5 | 21124247 | 21124408 | CSAR_peak_ | 25.12,13.66,.- | - |
| chr5 | 21124598 | 21124754 | CSAR_peak_ | 12.74,11.38    | - |
| chr5 | 21124814 | 21124876 | CSAR_peak_ | 12.13          | - |
| chr5 | 21152481 | 21152559 | CSAR_peak_ | 7.58           | - |
| chr5 | 21152588 | 21152816 | CSAR_peak_ | 10.82,30.81,.- | - |

|      |          |          |             |               |   |
|------|----------|----------|-------------|---------------|---|
| chr5 | 21152910 | 21152981 | CSAR_peak_! | 6.02,6.1      | - |
| chr5 | 21153129 | 21153263 | CSAR_peak_! | 24.21,6.95    | - |
| chr5 | 21153350 | 21153449 | CSAR_peak_! | 14.88,8.14    | - |
| chr5 | 21153595 | 21153747 | CSAR_peak_! | 7.27,5.86,5.8 | - |
| chr5 | 21153876 | 21153938 | CSAR_peak_! | 7.92,6.21     | - |
| chr5 | 21176426 | 21176520 | CSAR_peak_! | 14.88,14.88   | - |
| chr5 | 21176827 | 21176887 | CSAR_peak_! | 7.26,6.95     | - |
| chr5 | 21176891 | 21176984 | CSAR_peak_! | 7.27,14.88    | - |
| chr5 | 21176989 | 21177071 | CSAR_peak_! | 9.72,23.41    | - |
| chr5 | 21178632 | 21178692 | CSAR_peak_! | 10.83         | - |
| chr5 | 21178765 | 21178824 | CSAR_peak_! | 9.27          | - |
| chr5 | 21178876 | 21178919 | CSAR_peak_! | 17.82         | - |
| chr5 | 21179029 | 21179074 | CSAR_peak_! | 9.58,6.21     | - |
| chr5 | 21179146 | 21179194 | CSAR_peak_! | 6.21,9.58     | - |
| chr5 | 21179203 | 21179293 | CSAR_peak_! | 19.36,17.82   | - |
| chr5 | 21179806 | 21179932 | CSAR_peak_! | 6.81,14.88,9. | - |
| chr5 | 21180029 | 21180094 | CSAR_peak_! | 12.31,7.92    | - |
| chr5 | 21202856 | 21202931 | CSAR_peak_! | 9.58          | - |
| chr5 | 21202980 | 21203069 | CSAR_peak_! | 9.58,17.82    | - |
| chr5 | 21203269 | 21203319 | CSAR_peak_! | 8.65          | - |
| chr5 | 21203707 | 21203803 | CSAR_peak_! | 16.19,10.62   | - |
| chr5 | 21204703 | 21204749 | CSAR_peak_! | 7.27,9.58     | - |
| chr5 | 21283124 | 21283210 | CSAR_peak_! | 9.58,6.21     | - |
| chr5 | 21283274 | 21283317 | CSAR_peak_! | 6.21          | - |
| chr5 | 21329075 | 21329105 | CSAR_peak_! | 5.86          | - |
| chr5 | 21335372 | 21335433 | CSAR_peak_! | 6.21          | - |
| chr5 | 21359800 | 21359852 | CSAR_peak_! | 17.82,5.86,7. | - |
| chr5 | 21361142 | 21361195 | CSAR_peak_! | 6.21          | - |
| chr5 | 21361407 | 21361468 | CSAR_peak_! | 6.21          | - |
| chr5 | 21361539 | 21361589 | CSAR_peak_! | 7.26          | - |
| chr5 | 21361780 | 21361832 | CSAR_peak_! | 12.13         | - |
| chr5 | 21393397 | 21393443 | CSAR_peak_! | 5.86          | - |
| chr5 | 21432286 | 21432341 | CSAR_peak_! | 8.39          | - |
| chr5 | 21432838 | 21432912 | CSAR_peak_! | 6.44,5.86     | - |
| chr5 | 21434250 | 21434290 | CSAR_peak_! | 14.76,9.61    | - |
| chr5 | 21434385 | 21434471 | CSAR_peak_! | 18.65,10.83,  | - |
| chr5 | 21434586 | 21434675 | CSAR_peak_! | 6.03,24.21,2. | - |
| chr5 | 21434753 | 21434758 | CSAR_peak_! | 9.58          | - |
| chr5 | 21434821 | 21434895 | CSAR_peak_! | 9.58,14.88    | - |
| chr5 | 21435041 | 21435183 | CSAR_peak_! | 8.65,10.02    | - |
| chr5 | 21435196 | 21435251 | CSAR_peak_! | 11.14         | - |
| chr5 | 21435666 | 21435763 | CSAR_peak_! | 14.88         | - |

|      |          |          |            |                |   |
|------|----------|----------|------------|----------------|---|
| chr5 | 21435850 | 21435902 | CSAR_peak_ | 7.27           | - |
| chr5 | 21436655 | 21436682 | CSAR_peak_ | 7.27,7.27      | - |
| chr5 | 21436758 | 21436806 | CSAR_peak_ | 9.77,10.83     | - |
| chr5 | 21436951 | 21436996 | CSAR_peak_ | 6.21           | - |
| chr5 | 21437059 | 21437120 | CSAR_peak_ | 20.21,20.94    | - |
| chr5 | 21437193 | 21437201 | CSAR_peak_ | 12.13          | - |
| chr5 | 21437313 | 21437433 | CSAR_peak_ | 20.94,8.28,7.- | - |
| chr5 | 21438186 | 21438289 | CSAR_peak_ | 15.56,7.73     | - |
| chr5 | 21453158 | 21453212 | CSAR_peak_ | 12.13          | - |
| chr5 | 21485835 | 21485910 | CSAR_peak_ | 11.38,7.29     | - |
| chr5 | 21486194 | 21486240 | CSAR_peak_ | 6.44           | - |
| chr5 | 21486949 | 21486994 | CSAR_peak_ | 5.86           | - |
| chr5 | 21489991 | 21490041 | CSAR_peak_ | 8.39           | - |
| chr5 | 21490482 | 21490525 | CSAR_peak_ | 12.13          | - |
| chr5 | 21490670 | 21490744 | CSAR_peak_ | 12.13,8.14     | - |
| chr5 | 21490808 | 21490862 | CSAR_peak_ | 10.83          | - |
| chr5 | 21491109 | 21491209 | CSAR_peak_ | 13.48,7.58     | - |
| chr5 | 21491536 | 21491582 | CSAR_peak_ | 6.95           | - |
| chr5 | 21492454 | 21492499 | CSAR_peak_ | 7.27           | - |
| chr5 | 21493811 | 21493872 | CSAR_peak_ | 12.13,8.39     | - |
| chr5 | 21494648 | 21494697 | CSAR_peak_ | 6.21           | - |
| chr5 | 21495559 | 21495601 | CSAR_peak_ | 7.27           | - |
| chr5 | 21509907 | 21509993 | CSAR_peak_ | 10.83          | - |
| chr5 | 21510255 | 21510394 | CSAR_peak_ | 7.58,9.77      | - |
| chr5 | 21510398 | 21510448 | CSAR_peak_ | 12.13          | - |
| chr5 | 21510524 | 21510625 | CSAR_peak_ | 6.21,11.35     | - |
| chr5 | 21510669 | 21510731 | CSAR_peak_ | 8.39,7.27      | - |
| chr5 | 21510838 | 21510993 | CSAR_peak_ | 12.92,6.57,1.- | - |
| chr5 | 21511100 | 21511334 | CSAR_peak_ | 29.4,24.21,9.- | - |
| chr5 | 21511421 | 21511580 | CSAR_peak_ | 40.72,16.33    | - |
| chr5 | 21511623 | 21511840 | CSAR_peak_ | 8.95,38.71,8.- | - |
| chr5 | 21511906 | 21512086 | CSAR_peak_ | 19.36,16.08,-  | - |
| chr5 | 21512098 | 21512176 | CSAR_peak_ | 9.58,9.58      | - |
| chr5 | 21512224 | 21512421 | CSAR_peak_ | 16.11,29.4,7.- | - |
| chr5 | 21512581 | 21512879 | CSAR_peak_ | 12.31,27.64,-  | - |
| chr5 | 21513010 | 21513090 | CSAR_peak_ | 16.05,5.86,5.- | - |
| chr5 | 21513115 | 21513208 | CSAR_peak_ | 8.3,9.58       | - |
| chr5 | 21513274 | 21513385 | CSAR_peak_ | 8.14,11.75,6.- | - |
| chr5 | 21513389 | 21513457 | CSAR_peak_ | 16.08,8.95     | - |
| chr5 | 21536028 | 21536082 | CSAR_peak_ | 7.27,6.21      | - |
| chr5 | 21536366 | 21536447 | CSAR_peak_ | 7.27,7.27      | - |
| chr5 | 21536939 | 21536973 | CSAR_peak_ | 7.27           | - |



|      |          |          |            |                   |   |
|------|----------|----------|------------|-------------------|---|
| chr5 | 21537883 | 21537941 | CSAR_peak_ | 6.21              | - |
| chr5 | 21538010 | 21538047 | CSAR_peak_ | 7.27              | - |
| chr5 | 21538719 | 21538798 | CSAR_peak_ | 12.17,25.62       | - |
| chr5 | 21563431 | 21563476 | CSAR_peak_ | 13.48             | - |
| chr5 | 21563479 | 21563533 | CSAR_peak_ | 14.76             | - |
| chr5 | 21563721 | 21563776 | CSAR_peak_ | 9.58              | - |
| chr5 | 21564095 | 21564150 | CSAR_peak_ | 10.31,8.13        | - |
| chr5 | 21564161 | 21564205 | CSAR_peak_ | 14.88             | - |
| chr5 | 21564229 | 21564241 | CSAR_peak_ | 17.82             | - |
| chr5 | 21564369 | 21564464 | CSAR_peak_ | 20.94,42.64       | - |
| chr5 | 21564475 | 21564499 | CSAR_peak_ | 10.83,8.39        | - |
| chr5 | 21564770 | 21564851 | CSAR_peak_ | 7.27,7.27         | - |
| chr5 | 21564943 | 21565042 | CSAR_peak_ | 12.17             | - |
| chr5 | 21565374 | 21565412 | CSAR_peak_ | 10.83             | - |
| chr5 | 21566263 | 21566315 | CSAR_peak_ | 10.83             | - |
| chr5 | 21568898 | 21568980 | CSAR_peak_ | 9.58,14.76        | - |
| chr5 | 21571055 | 21571169 | CSAR_peak_ | 7.27,17.82        | - |
| chr5 | 21571399 | 21571466 | CSAR_peak_ | 14.88             | - |
| chr5 | 21632707 | 21632751 | CSAR_peak_ | 7.27,10.83        | - |
| chr5 | 21632786 | 21633028 | CSAR_peak_ | 37.55,15.9,11.28  | - |
| chr5 | 21633214 | 21633353 | CSAR_peak_ | 9.79,10.83,8.39   | - |
| chr5 | 21633493 | 21633615 | CSAR_peak_ | 13.37,12.17,11.28 | - |
| chr5 | 21633777 | 21633846 | CSAR_peak_ | 11.28,16.54       | - |
| chr5 | 21633920 | 21633937 | CSAR_peak_ | 6.21              | - |
| chr5 | 21633938 | 21634146 | CSAR_peak_ | 9.77,13.44,20.94  | - |
| chr5 | 21641412 | 21641458 | CSAR_peak_ | 9.77              | - |
| chr5 | 21642165 | 21642215 | CSAR_peak_ | 9.58,7.27         | - |
| chr5 | 21642473 | 21642510 | CSAR_peak_ | 5.86              | - |
| chr5 | 21683825 | 21683886 | CSAR_peak_ | 8.14              | - |
| chr5 | 21684724 | 21684784 | CSAR_peak_ | 12.13,8.65        | - |
| chr5 | 21685080 | 21685134 | CSAR_peak_ | 17.82             | - |
| chr5 | 21685736 | 21685786 | CSAR_peak_ | 8.39              | - |
| chr5 | 21686257 | 21686309 | CSAR_peak_ | 8.39              | - |
| chr5 | 21686450 | 21686508 | CSAR_peak_ | 12.13             | - |
| chr5 | 21686637 | 21686747 | CSAR_peak_ | 17.82,19.36       | - |
| chr5 | 21686856 | 21686919 | CSAR_peak_ | 7.27              | - |
| chr5 | 21686949 | 21687059 | CSAR_peak_ | 7.7,6.03          | - |
| chr5 | 21687951 | 21687989 | CSAR_peak_ | 6.21              | - |
| chr5 | 21723375 | 21723449 | CSAR_peak_ | 16.33,8.39        | - |
| chr5 | 21723520 | 21723553 | CSAR_peak_ | 7.27              | - |
| chr5 | 21723600 | 21723712 | CSAR_peak_ | 7.58,9.77         | - |
| chr5 | 21724519 | 21724557 | CSAR_peak_ | 10.83             | - |

|      |          |          |             |                |   |
|------|----------|----------|-------------|----------------|---|
| chr5 | 21725567 | 21725650 | CSAR_peak_  | 9.58           | - |
| chr5 | 21725758 | 21725804 | CSAR_peak_  | 6.21           | - |
| chr5 | 21726615 | 21726637 | CSAR_peak_  | 6.21           | - |
| chr5 | 21727016 | 21727145 | CSAR_peak_  | 10.83,24.21    | - |
| chr5 | 21727323 | 21727377 | CSAR_peak_  | 8.39,6.21      | - |
| chr5 | 21727505 | 21727562 | CSAR_peak_  | 16.33          | - |
| chr5 | 21727736 | 21727779 | CSAR_peak_  | 17.82          | - |
| chr5 | 21727803 | 21727889 | CSAR_peak_  | 12.17,9.58     | - |
| chr5 | 21727911 | 21728023 | CSAR_peak_  | 14.76,17.82    | - |
| chr5 | 21728034 | 21728114 | CSAR_peak_  | 15.2           | - |
| chr5 | 21728172 | 21728456 | CSAR_peak_  | 12.6,12.59,2(- | - |
| chr5 | 21728748 | 21728796 | CSAR_peak_  | 6.21           | - |
| chr5 | 21729033 | 21729071 | CSAR_peak_  | 9.58           | - |
| chr5 | 21746596 | 21746649 | CSAR_peak_  | 8.39           | - |
| chr5 | 21746814 | 21746873 | CSAR_peak_  | 7.27,7.27      | - |
| chr5 | 21747136 | 21747183 | CSAR_peak_  | 9.58           | - |
| chr5 | 21747360 | 21747404 | CSAR_peak_  | 10.83          | - |
| chr5 | 21747629 | 21747701 | CSAR_peak_  | 7.27           | - |
| chr5 | 21761172 | 21761233 | CSAR_peak_  | 6.21,8.28      | - |
| chr5 | 21761948 | 21762012 | CSAR_peak_  | 6.21           | - |
| chr5 | 21762066 | 21762123 | CSAR_peak_  | 6.95           | - |
| chr5 | 21762185 | 21762241 | CSAR_peak_  | 7.58           | - |
| chr5 | 21762327 | 21762390 | CSAR_peak_  | 16.05          | - |
| chr5 | 21762465 | 21762490 | CSAR_peak_  | 9.58           | - |
| chr5 | 21811661 | 21811664 | CSAR_peak_  | 20.88,24.16    | - |
| chr5 | 21811761 | 21811965 | CSAR_peak_  | 324.42,39.04   | - |
| chr5 | 21812494 | 21812496 | CSAR_peak_! | 10.83          | - |
| chr5 | 21812675 | 21812784 | CSAR_peak_! | 43.33,33.12,;- | - |
| chr5 | 21814027 | 21814230 | CSAR_peak_! | 8.14,266.71,;- | - |
| chr5 | 21814823 | 21814828 | CSAR_peak_! | 19.05,40.42    | - |
| chr5 | 21861330 | 21861373 | CSAR_peak_  | 7.27           | - |
| chr5 | 21861530 | 21861594 | CSAR_peak_  | 16.33,13.48    | - |
| chr5 | 21861719 | 21861764 | CSAR_peak_  | 17.82,6.85     | - |
| chr5 | 21861896 | 21861943 | CSAR_peak_  | 14.88          | - |
| chr5 | 21862131 | 21862217 | CSAR_peak_  | 33.47,6.1,13.- | - |
| chr5 | 21862273 | 21862301 | CSAR_peak_  | 8.28           | - |
| chr5 | 21862364 | 21862433 | CSAR_peak_  | 25.07,15.2     | - |
| chr5 | 21862644 | 21862703 | CSAR_peak_  | 8.39           | - |
| chr5 | 21862820 | 21862871 | CSAR_peak_  | 38.71          | - |
| chr5 | 21863812 | 21863958 | CSAR_peak_  | 12.13,10.02,;- | - |
| chr5 | 21895529 | 21895573 | CSAR_peak_  | 7.27           | - |
| chr5 | 21895630 | 21895675 | CSAR_peak_! | 5.86           | - |

|      |          |          |            |                |
|------|----------|----------|------------|----------------|
| chr5 | 21939765 | 21939863 | CSAR_peak_ | 105.33,13.18-  |
| chr5 | 21945385 | 21945608 | CSAR_peak_ | 659.87,36.74-  |
| chr5 | 21950380 | 21950428 | CSAR_peak_ | 7.27 -         |
| chr5 | 21951420 | 21951453 | CSAR_peak_ | 6.21 -         |
| chr5 | 21951565 | 21951608 | CSAR_peak_ | 8.39,16.33 -   |
| chr5 | 21951687 | 21951725 | CSAR_peak_ | 9.58,7.58 -    |
| chr5 | 21985213 | 21985280 | CSAR_peak_ | 7.27 -         |
| chr5 | 21985456 | 21985525 | CSAR_peak_ | 6.1,12.17 -    |
| chr5 | 21985979 | 21986038 | CSAR_peak_ | 10.83 -        |
| chr5 | 21986174 | 21986213 | CSAR_peak_ | 10.02 -        |
| chr5 | 22026083 | 22026124 | CSAR_peak_ | 6.21 -         |
| chr5 | 22026912 | 22026963 | CSAR_peak_ | 9.58 -         |
| chr5 | 22039478 | 22039529 | CSAR_peak_ | 14.88,7.27 -   |
| chr5 | 22039695 | 22039834 | CSAR_peak_ | 6.21,12.13 -   |
| chr5 | 22040182 | 22040255 | CSAR_peak_ | 22.56,12.13,-  |
| chr5 | 22042001 | 22042069 | CSAR_peak_ | 12.74,8.39 -   |
| chr5 | 22042151 | 22042236 | CSAR_peak_ | 7.27,9.77 -    |
| chr5 | 22042330 | 22042402 | CSAR_peak_ | 9.58 -         |
| chr5 | 22042466 | 22042483 | CSAR_peak_ | 6.21 -         |
| chr5 | 22042577 | 22042632 | CSAR_peak_ | 14.76,12.17 -  |
| chr5 | 22042789 | 22042846 | CSAR_peak_ | 9.58 -         |
| chr5 | 22043015 | 22043129 | CSAR_peak_ | 12.17,14.88 -  |
| chr5 | 22043571 | 22043630 | CSAR_peak_ | 17.82,7.58 -   |
| chr5 | 22043804 | 22043835 | CSAR_peak_ | 6.21 -         |
| chr5 | 22044087 | 22044107 | CSAR_peak_ | 6.21 -         |
| chr5 | 22044217 | 22044263 | CSAR_peak_ | 14.88,8.39 -   |
| chr5 | 22044334 | 22044368 | CSAR_peak_ | 6.03 -         |
| chr5 | 22044459 | 22044478 | CSAR_peak_ | 6.03 -         |
| chr5 | 22044758 | 22044800 | CSAR_peak_ | 24.21 -        |
| chr5 | 22045110 | 22045220 | CSAR_peak_ | 17.82,17.37 -  |
| chr5 | 22054584 | 22054643 | CSAR_peak_ | 7,6.81 -       |
| chr5 | 22057547 | 22057627 | CSAR_peak_ | 20.43,17.4 -   |
| chr5 | 22057730 | 22057779 | CSAR_peak_ | 12.13,12.13 -  |
| chr5 | 22059108 | 22059191 | CSAR_peak_ | 6.03,7.27 -    |
| chr5 | 22059206 | 22059214 | CSAR_peak_ | 10.31 -        |
| chr5 | 22059331 | 22059373 | CSAR_peak_ | 20.43 -        |
| chr5 | 22059512 | 22059574 | CSAR_peak_ | 10.31 -        |
| chr5 | 22059957 | 22060014 | CSAR_peak_ | 7.27 -         |
| chr5 | 22060140 | 22060195 | CSAR_peak_ | 9.58,16.33 -   |
| chr5 | 22114533 | 22114603 | CSAR_peak_ | 17.82 -        |
| chr5 | 22114657 | 22115065 | CSAR_peak_ | 20.43,17.4,6.- |
| chr5 | 22115196 | 22115339 | CSAR_peak_ | 7.27,30.21,2:- |

|      |          |          |            |                   |   |
|------|----------|----------|------------|-------------------|---|
| chr5 | 22115348 | 22115388 | CSAR_peak_ | 7.26              | - |
| chr5 | 22228185 | 22228314 | CSAR_peak_ | 8.39,10.02        | - |
| chr5 | 22229127 | 22229186 | CSAR_peak_ | 9.58              | - |
| chr5 | 22229491 | 22229547 | CSAR_peak_ | 6.21              | - |
| chr5 | 22229719 | 22229785 | CSAR_peak_ | 14.88,8.39        | - |
| chr5 | 22229792 | 22229852 | CSAR_peak_ | 14.88             | - |
| chr5 | 22229891 | 22229930 | CSAR_peak_ | 13.51             | - |
| chr5 | 22229973 | 22230106 | CSAR_peak_ | 16.08,7.95,10.02  | - |
| chr5 | 22230359 | 22230435 | CSAR_peak_ | 17.82,8.9         | - |
| chr5 | 22230440 | 22230501 | CSAR_peak_ | 14.88             | - |
| chr5 | 22230618 | 22230741 | CSAR_peak_ | 11.83,10.18       | - |
| chr5 | 22231530 | 22231606 | CSAR_peak_ | 9.97,19.36        | - |
| chr5 | 22232331 | 22232527 | CSAR_peak_ | 16.33,20.43       | - |
| chr5 | 22232540 | 22232577 | CSAR_peak_ | 7.27              | - |
| chr5 | 22232584 | 22232820 | CSAR_peak_ | 12.13,33.03       | - |
| chr5 | 22233960 | 22234140 | CSAR_peak_ | 12.13,7.58,10.02  | - |
| chr5 | 22234346 | 22234424 | CSAR_peak_ | 6.81,10.83,7.27   | - |
| chr5 | 22234603 | 22234699 | CSAR_peak_ | 9.58,9.77         | - |
| chr5 | 22234767 | 22234841 | CSAR_peak_ | 17.82,17.82       | - |
| chr5 | 22235167 | 22235238 | CSAR_peak_ | 16.33,8.39        | - |
| chr5 | 22235616 | 22235677 | CSAR_peak_ | 12.13,5.86        | - |
| chr5 | 22236363 | 22236469 | CSAR_peak_ | 7.27,7.58         | - |
| chr5 | 22264645 | 22264690 | CSAR_peak_ | 9.58              | - |
| chr5 | 22264823 | 22264892 | CSAR_peak_ | 7.92              | - |
| chr5 | 22264972 | 22265006 | CSAR_peak_ | 8.61              | - |
| chr5 | 22265077 | 22265245 | CSAR_peak_ | 30.53,17.19,10.02 | - |
| chr5 | 22265264 | 22265333 | CSAR_peak_ | 32.46             | - |
| chr5 | 22265422 | 22265493 | CSAR_peak_ | 9.58,10.83,9.77   | - |
| chr5 | 22265520 | 22265577 | CSAR_peak_ | 16.25,8.99        | - |
| chr5 | 22265608 | 22265859 | CSAR_peak_ | 25.08,8.39,20.43  | - |
| chr5 | 22265974 | 22266092 | CSAR_peak_ | 9.77,14.85        | - |
| chr5 | 22266095 | 22266175 | CSAR_peak_ | 22.52             | - |
| chr5 | 22266189 | 22266440 | CSAR_peak_ | 8.39,17.82        | - |
| chr5 | 22266449 | 22266515 | CSAR_peak_ | 12.13,7.34        | - |
| chr5 | 22277975 | 22278012 | CSAR_peak_ | 8.2               | - |
| chr5 | 22303368 | 22303469 | CSAR_peak_ | 16.33             | - |
| chr5 | 22303561 | 22303629 | CSAR_peak_ | 14.88             | - |
| chr5 | 22304469 | 22304514 | CSAR_peak_ | 7.58              | - |
| chr5 | 22304534 | 22304595 | CSAR_peak_ | 6.22,9.77         | - |
| chr5 | 22304853 | 22304988 | CSAR_peak_ | 17.82,10.83,10.02 | - |
| chr5 | 22305231 | 22305350 | CSAR_peak_ | 18.73,31.72       | - |
| chr5 | 22305361 | 22305413 | CSAR_peak_ | 12.17             | - |

|      |          |          |            |                |   |
|------|----------|----------|------------|----------------|---|
| chr5 | 22305434 | 22305578 | CSAR_peak_ | 24.21,13.66    | - |
| chr5 | 22305911 | 22306009 | CSAR_peak_ | 35.4,24.17,6.  | - |
| chr5 | 22306013 | 22306249 | CSAR_peak_ | 43.02,37.04    | - |
| chr5 | 22306383 | 22306415 | CSAR_peak_ | 8.39           | - |
| chr5 | 22306434 | 22306618 | CSAR_peak_ | 38.71,9.77     | - |
| chr5 | 22306642 | 22306976 | CSAR_peak_ | 31.67,8.28,14. | - |
| chr5 | 22307040 | 22307081 | CSAR_peak_ | 7.27           | - |
| chr5 | 22307089 | 22307338 | CSAR_peak_ | 18.61,9.58,14. | - |
| chr5 | 22307345 | 22307451 | CSAR_peak_ | 6.21,8.39      | - |
| chr5 | 22307481 | 22307496 | CSAR_peak_ | 5.86           | - |
| chr5 | 22307514 | 22307544 | CSAR_peak_ | 14.88,7.27     | - |
| chr5 | 22307960 | 22308245 | CSAR_peak_ | 66.91,42.64,4. | - |
| chr5 | 22308275 | 22308910 | CSAR_peak_ | 20.94,10.02,1. | - |
| chr5 | 22308935 | 22309059 | CSAR_peak_ | 28.12,26.43    | - |
| chr5 | 22309069 | 22309408 | CSAR_peak_ | 69.59,82.62    | - |
| chr5 | 22310892 | 22310949 | CSAR_peak_ | 6.03,7.27      | - |
| chr5 | 22310951 | 22311138 | CSAR_peak_ | 7.27,6.44,8.0. | - |
| chr5 | 22311298 | 22311368 | CSAR_peak_ | 6.21           | - |
| chr5 | 22311876 | 22312011 | CSAR_peak_ | 7.27,12.13,7.  | - |
| chr5 | 22312518 | 22312568 | CSAR_peak_ | 7.27,6.21      | - |
| chr5 | 22312621 | 22312708 | CSAR_peak_ | 12.13,21.24    | - |
| chr5 | 22325774 | 22325856 | CSAR_peak_ | 27.94,19.36    | - |
| chr5 | 22325922 | 22325929 | CSAR_peak_ | 7.27           | - |
| chr5 | 22327052 | 22327132 | CSAR_peak_ | 6.21,8.39      | - |
| chr5 | 22327180 | 22327220 | CSAR_peak_ | 6.21           | - |
| chr5 | 22327368 | 22327498 | CSAR_peak_ | 24.21,14.88    | - |
| chr5 | 22327541 | 22327627 | CSAR_peak_ | 10.83,17.82    | - |
| chr5 | 22328194 | 22328266 | CSAR_peak_ | 14.88          | - |
| chr5 | 22328312 | 22328433 | CSAR_peak_ | 24.21,14.34    | - |
| chr5 | 22328540 | 22328657 | CSAR_peak_ | 9.58           | - |
| chr5 | 22329028 | 22329040 | CSAR_peak_ | 10.31          | - |
| chr5 | 22329165 | 22329188 | CSAR_peak_ | 9.58           | - |
| chr5 | 22329277 | 22329351 | CSAR_peak_ | 6.57,12.13     | - |
| chr5 | 22329360 | 22329423 | CSAR_peak_ | 9.77,10.95     | - |
| chr5 | 22329528 | 22329593 | CSAR_peak_ | 7.27,16.11,4.  | - |
| chr5 | 22329682 | 22329801 | CSAR_peak_ | 7.27,7.26      | - |
| chr5 | 22329965 | 22330069 | CSAR_peak_ | 17.87,9.77     | - |
| chr5 | 22330233 | 22330342 | CSAR_peak_ | 16.23,13.48,1. | - |
| chr5 | 22330440 | 22330509 | CSAR_peak_ | 14.93,8.13     | - |
| chr5 | 22330582 | 22330605 | CSAR_peak_ | 6.21           | - |
| chr5 | 22330725 | 22330767 | CSAR_peak_ | 6.02           | - |
| chr5 | 22331172 | 22331545 | CSAR_peak_ | 9.58,54.14,7.  | - |

|      |          |          |            |              |   |
|------|----------|----------|------------|--------------|---|
| chr5 | 22331552 | 22331685 | CSAR_peak_ | 17.4,10.83   | - |
| chr5 | 22331714 | 22331772 | CSAR_peak_ | 8.95         | - |
| chr5 | 22331774 | 22331785 | CSAR_peak_ | 9.77         | - |
| chr5 | 22361618 | 22361667 | CSAR_peak_ | 6.57         | - |
| chr5 | 22361744 | 22361796 | CSAR_peak_ | 5.86         | - |
| chr5 | 22361961 | 22362004 | CSAR_peak_ | 8.65         | - |
| chr5 | 22363023 | 22363108 | CSAR_peak_ | 11.14,13.48  | - |
| chr5 | 22363260 | 22363298 | CSAR_peak_ | 6.21         | - |
| chr5 | 22363326 | 22363386 | CSAR_peak_ | 6.21,9.58    | - |
| chr5 | 22363966 | 22364010 | CSAR_peak_ | 7.58         | - |
| chr5 | 22364104 | 22364169 | CSAR_peak_ | 12.31,10.95  | - |
| chr5 | 22424856 | 22424900 | CSAR_peak_ | 8.39         | - |
| chr5 | 22425072 | 22425171 | CSAR_peak_ | 10.12        | - |
| chr5 | 22425459 | 22425516 | CSAR_peak_ | 12.13        | - |
| chr5 | 22426466 | 22426548 | CSAR_peak_ | 8.28,6.81    | - |
| chr5 | 22427546 | 22427652 | CSAR_peak_ | 7.27,5.95    | - |
| chr5 | 22430609 | 22430684 | CSAR_peak_ | 6.44,8.09    | - |
| chr5 | 22430832 | 22430876 | CSAR_peak_ | 9.55         | - |
| chr5 | 22430989 | 22431047 | CSAR_peak_ | 6.94,5.86    | - |
| chr5 | 22431583 | 22431606 | CSAR_peak_ | 7.27         | - |
| chr5 | 22431786 | 22431818 | CSAR_peak_ | 10.96        | - |
| chr5 | 22432012 | 22432038 | CSAR_peak_ | 10.18        | - |
| chr5 | 22432040 | 22432091 | CSAR_peak_ | 7.27         | - |
| chr5 | 22433094 | 22433176 | CSAR_peak_ | 19.36,9.58   | - |
| chr5 | 22434078 | 22434127 | CSAR_peak_ | 7.27         | - |
| chr5 | 22434183 | 22434221 | CSAR_peak_ | 8.39         | - |
| chr5 | 22435007 | 22435055 | CSAR_peak_ | 9.58         | - |
| chr5 | 22448772 | 22448836 | CSAR_peak_ | 9.58,19.36   | - |
| chr5 | 22448971 | 22449050 | CSAR_peak_ | 7.58,6.21    | - |
| chr5 | 22449135 | 22449224 | CSAR_peak_ | 6.21         | - |
| chr5 | 22449849 | 22449862 | CSAR_peak_ | 7.27         | - |
| chr5 | 22449965 | 22450027 | CSAR_peak_ | 12.31,24.52, | - |
| chr5 | 22450201 | 22450236 | CSAR_peak_ | 6.57         | - |
| chr5 | 22450821 | 22450862 | CSAR_peak_ | 6.21         | - |
| chr5 | 22451199 | 22451240 | CSAR_peak_ | 10.83        | - |
| chr5 | 22451831 | 22451909 | CSAR_peak_ | 16.33,5.9    | - |
| chr5 | 22451925 | 22452020 | CSAR_peak_ | 13.85,21.37  | - |
| chr5 | 22452068 | 22452096 | CSAR_peak_ | 6.44         | - |
| chr5 | 22453272 | 22453409 | CSAR_peak_ | 17.51,16.33  | - |
| chr5 | 22453521 | 22453543 | CSAR_peak_ | 7.27         | - |
| chr5 | 22453805 | 22453861 | CSAR_peak_ | 8.39,9.58    | - |
| chr5 | 22502185 | 22502228 | CSAR_peak_ | 10.83        | - |

|      |          |          |            |               |   |
|------|----------|----------|------------|---------------|---|
| chr5 | 22503132 | 22503197 | CSAR_peak_ | 12.17         | - |
| chr5 | 22503612 | 22503662 | CSAR_peak_ | 5.86,8.14     | - |
| chr5 | 22522307 | 22522346 | CSAR_peak_ | 7.27,9.58     | - |
| chr5 | 22522818 | 22522878 | CSAR_peak_ | 7.27,24.21    | - |
| chr5 | 22523154 | 22523300 | CSAR_peak_ | 22.56,12.13   | - |
| chr5 | 22524897 | 22524955 | CSAR_peak_ | 6.21,9.58     | - |
| chr5 | 22544755 | 22544849 | CSAR_peak_ | 7.27          | - |
| chr5 | 22545948 | 22546028 | CSAR_peak_ | 7.27          | - |
| chr5 | 22546329 | 22546342 | CSAR_peak_ | 6.03          | - |
| chr5 | 22546679 | 22546744 | CSAR_peak_ | 6.03          | - |
| chr5 | 22579359 | 22579403 | CSAR_peak_ | 16.34         | - |
| chr5 | 22580988 | 22581088 | CSAR_peak_ | 9.61,16.33    | - |
| chr5 | 22631238 | 22631308 | CSAR_peak_ | 10.31,17.37   | - |
| chr5 | 22631419 | 22631439 | CSAR_peak_ | 7.27          | - |
| chr5 | 22632435 | 22632493 | CSAR_peak_ | 6.21          | - |
| chr5 | 22641181 | 22641253 | CSAR_peak_ | 12.13,6.21    | - |
| chr5 | 22641288 | 22641314 | CSAR_peak_ | 6.21          | - |
| chr5 | 22737528 | 22737622 | CSAR_peak_ | 14.88,9.58    | - |
| chr5 | 22737902 | 22737983 | CSAR_peak_ | 16.08,6.85    | - |
| chr5 | 22737991 | 22738062 | CSAR_peak_ | 7.27,6.21     | - |
| chr5 | 22738129 | 22738179 | CSAR_peak_ | 6.85          | - |
| chr5 | 22738507 | 22738544 | CSAR_peak_ | 7.27          | - |
| chr5 | 22738945 | 22739000 | CSAR_peak_ | 7.27          | - |
| chr5 | 22739007 | 22739021 | CSAR_peak_ | 6.21          | - |
| chr5 | 22739787 | 22739829 | CSAR_peak_ | 6.21          | - |
| chr5 | 22740087 | 22740215 | CSAR_peak_ | 9.58,10.83    | - |
| chr5 | 22740315 | 22740336 | CSAR_peak_ | 7.27          | - |
| chr5 | 22740440 | 22740509 | CSAR_peak_ | 7.27,9.58     | - |
| chr5 | 22740749 | 22740839 | CSAR_peak_ | 6.21          | - |
| chr5 | 22751210 | 22751250 | CSAR_peak_ | 7.27          | - |
| chr5 | 22751670 | 22751713 | CSAR_peak_ | 10.83         | - |
| chr5 | 22752347 | 22752397 | CSAR_peak_ | 9.58          | - |
| chr5 | 22754680 | 22754709 | CSAR_peak_ | 8.39          | - |
| chr5 | 22755163 | 22755217 | CSAR_peak_ | 7.58          | - |
| chr5 | 22758169 | 22758225 | CSAR_peak_ | 6.21,7.27     | - |
| chr5 | 22760552 | 22760601 | CSAR_peak_ | 6.21          | - |
| chr5 | 22761267 | 22761382 | CSAR_peak_ | 22.56,26.69   | - |
| chr5 | 22761743 | 22761915 | CSAR_peak_ | 11.14,13.51,- | - |
| chr5 | 22762009 | 22762069 | CSAR_peak_ | 13.48         | - |
| chr5 | 22762253 | 22762361 | CSAR_peak_ | 7.27          | - |
| chr5 | 22762577 | 22762673 | CSAR_peak_ | 27.64,14.88   | - |
| chr5 | 22762695 | 22762821 | CSAR_peak_ | 25.91,6.21    | - |

|      |          |          |            |               |   |
|------|----------|----------|------------|---------------|---|
| chr5 | 22762967 | 22763021 | CSAR_peak_ | 9.58,9.58     | - |
| chr5 | 22785064 | 22785123 | CSAR_peak_ | 6.21          | - |
| chr5 | 22820707 | 22820782 | CSAR_peak_ | 17.82         | - |
| chr5 | 22821487 | 22821519 | CSAR_peak_ | 6.21          | - |
| chr5 | 22823435 | 22823484 | CSAR_peak_ | 7.27          | - |
| chr5 | 22823608 | 22823652 | CSAR_peak_ | 14.88         | - |
| chr5 | 22824092 | 22824138 | CSAR_peak_ | 11.03         | - |
| chr5 | 22826881 | 22826964 | CSAR_peak_ | 12.13         | - |
| chr5 | 22895367 | 22895417 | CSAR_peak_ | 8.65          | - |
| chr5 | 22895505 | 22895551 | CSAR_peak_ | 12.13         | - |
| chr5 | 22895642 | 22895792 | CSAR_peak_ | 8.39,6.21     | - |
| chr5 | 22895823 | 22895872 | CSAR_peak_ | 12.13,6.21    | - |
| chr5 | 22895928 | 22896103 | CSAR_peak_ | 23.2,21.35    | - |
| chr5 | 22896240 | 22896296 | CSAR_peak_ | 14.88,13.44   | - |
| chr5 | 22896419 | 22896530 | CSAR_peak_ | 22.69,22.15   | - |
| chr5 | 22935336 | 22935375 | CSAR_peak_ | 7.27          | - |
| chr5 | 22935808 | 22935843 | CSAR_peak_ | 6.21          | - |
| chr5 | 22943978 | 22944059 | CSAR_peak_ | 7.27          | - |
| chr5 | 22961203 | 22961255 | CSAR_peak_ | 7.27          | - |
| chr5 | 22961547 | 22961728 | CSAR_peak_ | 16.33,22.58   | - |
| chr5 | 22961740 | 22961795 | CSAR_peak_ | 10.96,8.39    | - |
| chr5 | 22961800 | 22961889 | CSAR_peak_ | 17.4,17.82    | - |
| chr5 | 22961919 | 22962068 | CSAR_peak_ | 16.11,12.31   | - |
| chr5 | 22962164 | 22962245 | CSAR_peak_ | 10.83,7.27    | - |
| chr5 | 22962401 | 22962469 | CSAR_peak_ | 14.88,20.94   | - |
| chr5 | 22972091 | 22972132 | CSAR_peak_ | 7.92          | - |
| chr5 | 22972369 | 22972388 | CSAR_peak_ | 6.21          | - |
| chr5 | 22985576 | 22985664 | CSAR_peak_ | 7.27,7.27     | - |
| chr5 | 22985779 | 22985901 | CSAR_peak_ | 17.82         | - |
| chr5 | 22985968 | 22986107 | CSAR_peak_ | 5.86,14.88,24 | - |
| chr5 | 22986141 | 22986292 | CSAR_peak_ | 17.82,20.43   | - |
| chr5 | 22986381 | 22986495 | CSAR_peak_ | 25.91,8.2,15. | - |
| chr5 | 22986537 | 22986627 | CSAR_peak_ | 8.65,7.92     | - |
| chr5 | 22986628 | 22986686 | CSAR_peak_ | 10.83         | - |
| chr5 | 22986910 | 22986991 | CSAR_peak_ | 22.56         | - |
| chr5 | 22990442 | 22990491 | CSAR_peak_ | 7.27          | - |
| chr5 | 23009166 | 23009275 | CSAR_peak_ | 5.62,7.27,12. | - |
| chr5 | 23009543 | 23009614 | CSAR_peak_ | 7.92,12.13    | - |
| chr5 | 23011562 | 23011613 | CSAR_peak_ | 12.13         | - |
| chr5 | 23019793 | 23019844 | CSAR_peak_ | 9.58          | - |
| chr5 | 23022045 | 23022123 | CSAR_peak_ | 6.21          | - |
| chr5 | 23056580 | 23056639 | CSAR_peak_ | 7.58,14.88    | - |



|      |          |          |            |                   |   |
|------|----------|----------|------------|-------------------|---|
| chr5 | 23056708 | 23056848 | CSAR_peak_ | 14.34,12.27       | - |
| chr5 | 23057033 | 23057080 | CSAR_peak_ | 7.27              | - |
| chr5 | 23084636 | 23084668 | CSAR_peak_ | 7.27              | - |
| chr5 | 23106697 | 23106719 | CSAR_peak_ | 6.21              | - |
| chr5 | 23107207 | 23107269 | CSAR_peak_ | 35.24,31.2        | - |
| chr5 | 23108113 | 23108156 | CSAR_peak_ | 9.58              | - |
| chr5 | 23108350 | 23108393 | CSAR_peak_ | 9.58              | - |
| chr5 | 23110344 | 23110393 | CSAR_peak_ | 9.58              | - |
| chr5 | 23110915 | 23111004 | CSAR_peak_ | 7.27,8.28         | - |
| chr5 | 23111446 | 23111570 | CSAR_peak_ | 10.33,19.83       | - |
| chr5 | 23111677 | 23111802 | CSAR_peak_ | 15.2,14.88,14.88  | - |
| chr5 | 23112019 | 23112142 | CSAR_peak_ | 20.43,17.37,17.37 | - |
| chr5 | 23112147 | 23112207 | CSAR_peak_ | 8.28              | - |
| chr5 | 23112306 | 23112389 | CSAR_peak_ | 34.89             | - |
| chr5 | 23112549 | 23112627 | CSAR_peak_ | 10.83,8.95        | - |
| chr5 | 23112891 | 23113016 | CSAR_peak_ | 11.96,6.05,3.05   | - |
| chr5 | 23113198 | 23113244 | CSAR_peak_ | 16.22,10.7        | - |
| chr5 | 23113261 | 23113297 | CSAR_peak_ | 9.77              | - |
| chr5 | 23113375 | 23113432 | CSAR_peak_ | 7.27,9.58         | - |
| chr5 | 23113554 | 23113680 | CSAR_peak_ | 6.44,7.29         | - |
| chr5 | 23113771 | 23113895 | CSAR_peak_ | 12.27,7.58        | - |
| chr5 | 23114120 | 23114179 | CSAR_peak_ | 11.38,6.95        | - |
| chr5 | 23114228 | 23114378 | CSAR_peak_ | 23.95,14.88       | - |
| chr5 | 23114428 | 23114584 | CSAR_peak_ | 6.21,25.91,14.88  | - |
| chr5 | 23114660 | 23114744 | CSAR_peak_ | 6.45,24.35        | - |
| chr5 | 23114850 | 23114924 | CSAR_peak_ | 8.12,28.34        | - |
| chr5 | 23115023 | 23115110 | CSAR_peak_ | 12.31,6.21        | - |
| chr5 | 23115173 | 23115225 | CSAR_peak_ | 17.82             | - |
| chr5 | 23115264 | 23115281 | CSAR_peak_ | 6.21              | - |
| chr5 | 23115349 | 23115420 | CSAR_peak_ | 6.85,19.96,2.05   | - |
| chr5 | 23115421 | 23115485 | CSAR_peak_ | 6.81              | - |
| chr5 | 23115530 | 23115567 | CSAR_peak_ | 15.2,9.41         | - |
| chr5 | 23115603 | 23115612 | CSAR_peak_ | 13.02             | - |
| chr5 | 23115722 | 23115804 | CSAR_peak_ | 11.47,31.36       | - |
| chr5 | 23115908 | 23116080 | CSAR_peak_ | 5.86,9.58,26.21   | - |
| chr5 | 23116143 | 23116259 | CSAR_peak_ | 11.34,12.93,12.93 | - |
| chr5 | 23116292 | 23116485 | CSAR_peak_ | 15,7.73,7.27,7.27 | - |
| chr5 | 23116491 | 23116511 | CSAR_peak_ | 6.44,12.17        | - |
| chr5 | 23116557 | 23116623 | CSAR_peak_ | 14.92,8.34        | - |
| chr5 | 23116706 | 23116798 | CSAR_peak_ | 9.58              | - |
| chr5 | 23116805 | 23116884 | CSAR_peak_ | 15.28,10.31       | - |
| chr5 | 23117121 | 23117187 | CSAR_peak_ | 7.27              | - |

|      |          |          |             |                |   |
|------|----------|----------|-------------|----------------|---|
| chr5 | 23123417 | 23123469 | CSAR_peak_  | 8.39           | - |
| chr5 | 23155519 | 23155574 | CSAR_peak_  | 9.58           | - |
| chr5 | 23155808 | 23155866 | CSAR_peak_  | 9.58           | - |
| chr5 | 23157765 | 23157797 | CSAR_peak_  | 7.27           | - |
| chr5 | 23157937 | 23157989 | CSAR_peak_  | 9.58           | - |
| chr5 | 23158542 | 23158618 | CSAR_peak_  | 8.39           | - |
| chr5 | 23159077 | 23159108 | CSAR_peak_  | 9.58           | - |
| chr5 | 23159308 | 23159323 | CSAR_peak_  | 7.27           | - |
| chr5 | 23159931 | 23159975 | CSAR_peak_  | 8.39           | - |
| chr5 | 23161191 | 23161246 | CSAR_peak_  | 7.27           | - |
| chr5 | 23266272 | 23266305 | CSAR_peak_! | 5.86           | - |
| chr5 | 23279980 | 23280066 | CSAR_peak_  | 7.27           | - |
| chr5 | 23307160 | 23307242 | CSAR_peak_  | 22.58,6.57     | - |
| chr5 | 23307307 | 23307479 | CSAR_peak_  | 12.6,14.88,7.  | - |
| chr5 | 23307485 | 23307520 | CSAR_peak_  | 6.21           | - |
| chr5 | 23307551 | 23307633 | CSAR_peak_  | 33.46,23.46    | - |
| chr5 | 23307641 | 23307950 | CSAR_peak_  | 23.35,52.59,;- | - |
| chr5 | 23307959 | 23308028 | CSAR_peak_  | 39.92,18.85    | - |
| chr5 | 23308098 | 23308166 | CSAR_peak_  | 10.18,27.64    | - |
| chr5 | 23314941 | 23315040 | CSAR_peak_  | 7.27           | - |
| chr5 | 23315900 | 23315928 | CSAR_peak_  | 9.58           | - |
| chr5 | 23316174 | 23316243 | CSAR_peak_  | 12.17          | - |
| chr5 | 23316253 | 23316319 | CSAR_peak_  | 7.27           | - |
| chr5 | 23316398 | 23316484 | CSAR_peak_  | 9.58,7.92,16.  | - |
| chr5 | 23316525 | 23316555 | CSAR_peak_  | 16.33          | - |
| chr5 | 23316638 | 23316683 | CSAR_peak_  | 7.92           | - |
| chr5 | 23316735 | 23316787 | CSAR_peak_  | 12.13,6.1      | - |
| chr5 | 23316874 | 23316951 | CSAR_peak_  | 7.58           | - |
| chr5 | 23316986 | 23317033 | CSAR_peak_  | 16.11          | - |
| chr5 | 23317081 | 23317124 | CSAR_peak_  | 8.39           | - |
| chr5 | 23317232 | 23317377 | CSAR_peak_  | 17.37,7.92     | - |
| chr5 | 23317440 | 23317514 | CSAR_peak_  | 9.97,9.58      | - |
| chr5 | 23317586 | 23317653 | CSAR_peak_  | 10.99,7.27     | - |
| chr5 | 23340974 | 23341065 | CSAR_peak_  | 9.35,7.27      | - |
| chr5 | 23341123 | 23341206 | CSAR_peak_  | 30.81,35.24,(- | - |
| chr5 | 23341224 | 23341328 | CSAR_peak_  | 12.59,27.77,;- | - |
| chr5 | 23341449 | 23341582 | CSAR_peak_  | 23.68,8.66     | - |
| chr5 | 23341665 | 23341732 | CSAR_peak_  | 9.58           | - |
| chr5 | 23341739 | 23341924 | CSAR_peak_  | 27.77,12.59,(- | - |
| chr5 | 23342052 | 23342157 | CSAR_peak_  | 9.55,15.96,2(- | - |
| chr5 | 23342209 | 23342313 | CSAR_peak_  | 14.92,8.14,7.  | - |
| chr5 | 23342337 | 23342368 | CSAR_peak_  | 12.31,6.57     | - |

|      |          |          |            |               |
|------|----------|----------|------------|---------------|
| chr5 | 23342642 | 23342831 | CSAR_peak_ | 12.13,15.43,- |
| chr5 | 23342913 | 23343127 | CSAR_peak_ | 35.24,16.11,- |
| chr5 | 23366174 | 23366230 | CSAR_peak_ | 7.27,6.21 -   |
| chr5 | 23396127 | 23396176 | CSAR_peak_ | 12.13 -       |
| chr5 | 23435800 | 23435870 | CSAR_peak_ | 6.21 -        |
| chr5 | 23448354 | 23448368 | CSAR_peak_ | 6.21 -        |
| chr5 | 23448435 | 23448501 | CSAR_peak_ | 13.48,10.83 - |
| chr5 | 23449935 | 23449999 | CSAR_peak_ | 7.27 -        |
| chr5 | 23465535 | 23465586 | CSAR_peak_ | 24.21,7.27 -  |
| chr5 | 23470469 | 23470568 | CSAR_peak_ | 6.81,7.27 -   |
| chr5 | 23470765 | 23470816 | CSAR_peak_ | 7.27 -        |
| chr5 | 23471412 | 23471472 | CSAR_peak_ | 7.27,6.21 -   |
| chr5 | 23471632 | 23471746 | CSAR_peak_ | 13.48,16.33 - |
| chr5 | 23472466 | 23472573 | CSAR_peak_ | 16.33,14.88 - |
| chr5 | 23472906 | 23472952 | CSAR_peak_ | 8.39,6.21 -   |
| chr5 | 23500111 | 23500158 | CSAR_peak_ | 10.83 -       |
| chr5 | 23500194 | 23500355 | CSAR_peak_ | 25.91,5.86,1- |
| chr5 | 23500511 | 23500580 | CSAR_peak_ | 9.58 -        |
| chr5 | 23500617 | 23500650 | CSAR_peak_ | 5.86 -        |
| chr5 | 23500687 | 23500762 | CSAR_peak_ | 15.21,20.43,- |
| chr5 | 23500784 | 23500876 | CSAR_peak_ | 21.94,13.51 - |
| chr5 | 23500949 | 23501119 | CSAR_peak_ | 17.37,12.31,- |
| chr5 | 23504944 | 23505018 | CSAR_peak_ | 8.14 -        |
| chr5 | 23505918 | 23505999 | CSAR_peak_ | 9.58,17.82 -  |
| chr5 | 23506019 | 23506074 | CSAR_peak_ | 6.21 -        |
| chr5 | 23506658 | 23506734 | CSAR_peak_ | 8.39,8.14 -   |
| chr5 | 23558541 | 23558591 | CSAR_peak_ | 13.48 -       |
| chr5 | 23577470 | 23577512 | CSAR_peak_ | 7.27 -        |
| chr5 | 23580148 | 23580202 | CSAR_peak_ | 8.65,7.27 -   |
| chr5 | 23580284 | 23580353 | CSAR_peak_ | 12.74 -       |
| chr5 | 23580591 | 23580637 | CSAR_peak_ | 7.27 -        |
| chr5 | 23581299 | 23581340 | CSAR_peak_ | 14.88 -       |
| chr5 | 23581384 | 23581491 | CSAR_peak_ | 13.48,8.28 -  |
| chr5 | 23621498 | 23621560 | CSAR_peak_ | 6.21,8.28 -   |
| chr5 | 23621642 | 23621699 | CSAR_peak_ | 7.27 -        |
| chr5 | 23624617 | 23624636 | CSAR_peak_ | 6.21 -        |
| chr5 | 23626648 | 23626690 | CSAR_peak_ | 6.21 -        |
| chr5 | 23637606 | 23637647 | CSAR_peak_ | 8.39 -        |
| chr5 | 23639412 | 23639485 | CSAR_peak_ | 7.27 -        |
| chr5 | 23639511 | 23639549 | CSAR_peak_ | 17.82 -       |
| chr5 | 23639688 | 23639748 | CSAR_peak_ | 17.82,16.33 - |
| chr5 | 23639874 | 23639922 | CSAR_peak_ | 14.88 -       |

|      |          |          |            |               |   |
|------|----------|----------|------------|---------------|---|
| chr5 | 23640275 | 23640322 | CSAR_peak_ | 7.34,6.1      | - |
| chr5 | 23640444 | 23640453 | CSAR_peak_ | 7.27          | - |
| chr5 | 23640456 | 23640535 | CSAR_peak_ | 16.08,5.86    | - |
| chr5 | 23640670 | 23640729 | CSAR_peak_ | 8.2           | - |
| chr5 | 23640814 | 23640893 | CSAR_peak_ | 12.13         | - |
| chr5 | 23648575 | 23648605 | CSAR_peak_ | 9.58          | - |
| chr5 | 23648670 | 23648735 | CSAR_peak_ | 22.56,9.55,2  | - |
| chr5 | 23648787 | 23648838 | CSAR_peak_ | 7.27          | - |
| chr5 | 23649033 | 23649088 | CSAR_peak_ | 6.21          | - |
| chr5 | 23649297 | 23649378 | CSAR_peak_ | 6.85,9.58     | - |
| chr5 | 23649389 | 23649490 | CSAR_peak_ | 6.21          | - |
| chr5 | 23650409 | 23650489 | CSAR_peak_ | 16.19,8.39    | - |
| chr5 | 23650644 | 23650653 | CSAR_peak_ | 9.58          | - |
| chr5 | 23652005 | 23652081 | CSAR_peak_ | 18.73,16.11   | - |
| chr5 | 23652619 | 23652676 | CSAR_peak_ | 13.48,16.33   | - |
| chr5 | 23653089 | 23653118 | CSAR_peak_ | 6.21          | - |
| chr5 | 23665873 | 23665944 | CSAR_peak_ | 13.48         | - |
| chr5 | 23682877 | 23682965 | CSAR_peak_ | 17.51,23.57,  | - |
| chr5 | 23683177 | 23683261 | CSAR_peak_ | 5.97          | - |
| chr5 | 23683306 | 23683337 | CSAR_peak_ | 14.7          | - |
| chr5 | 23683407 | 23683489 | CSAR_peak_ | 17.22,14.04,  | - |
| chr5 | 23699232 | 23699307 | CSAR_peak_ | 7.27          | - |
| chr5 | 23699353 | 23699409 | CSAR_peak_ | 8.39          | - |
| chr5 | 23699444 | 23699670 | CSAR_peak_ | 25.91,29.2    | - |
| chr5 | 23699885 | 23700075 | CSAR_peak_ | 8.39,22.09,1  | - |
| chr5 | 23700099 | 23700188 | CSAR_peak_ | 17.82,19.98   | - |
| chr5 | 23706264 | 23706340 | CSAR_peak_ | 6.21          | - |
| chr5 | 23710803 | 23710827 | CSAR_peak_ | 7.27          | - |
| chr5 | 23710910 | 23710986 | CSAR_peak_ | 10.83         | - |
| chr5 | 23712421 | 23712470 | CSAR_peak_ | 7.27          | - |
| chr5 | 23719983 | 23720058 | CSAR_peak_ | 11.14,15.71   | - |
| chr5 | 23720108 | 23720175 | CSAR_peak_ | 7.27          | - |
| chr5 | 23720188 | 23720276 | CSAR_peak_ | 10.31,21.26,  | - |
| chr5 | 23720297 | 23720351 | CSAR_peak_ | 10.83,12.13   | - |
| chr5 | 23720414 | 23720535 | CSAR_peak_ | 23.03,9.8     | - |
| chr5 | 23720576 | 23720746 | CSAR_peak_ | 13.35,10.82,  | - |
| chr5 | 23720772 | 23720970 | CSAR_peak_ | 19.45,7.26,2  | - |
| chr5 | 23721176 | 23721372 | CSAR_peak_ | 15.32,8.39,1  | - |
| chr5 | 23721742 | 23721818 | CSAR_peak_ | 6.21,13.48,8. | - |
| chr5 | 23721889 | 23721963 | CSAR_peak_ | 14.93,12.13   | - |
| chr5 | 23722032 | 23722068 | CSAR_peak_ | 7             | - |
| chr5 | 23722120 | 23722225 | CSAR_peak_ | 6.1,9.58,9.48 | - |

|      |          |          |            |                |   |
|------|----------|----------|------------|----------------|---|
| chr5 | 23722335 | 23722523 | CSAR_peak_ | 5.7,18.49,27.  | - |
| chr5 | 23722534 | 23722829 | CSAR_peak_ | 31.2,29.69,31. | - |
| chr5 | 23722887 | 23722993 | CSAR_peak_ | 20.43,19.36    | - |
| chr5 | 23724531 | 23724591 | CSAR_peak_ | 9.58           | - |
| chr5 | 23731964 | 23732014 | CSAR_peak_ | 6.21           | - |
| chr5 | 23746322 | 23746366 | CSAR_peak_ | 6.21           | - |
| chr5 | 23766924 | 23767031 | CSAR_peak_ | 10.02,13.48    | - |
| chr5 | 23770663 | 23770737 | CSAR_peak_ | 7.27,7.27      | - |
| chr5 | 23771654 | 23771705 | CSAR_peak_ | 8.39           | - |
| chr5 | 23772341 | 23772390 | CSAR_peak_ | 8.39           | - |
| chr5 | 23772860 | 23772982 | CSAR_peak_ | 6.81,9.27,17.  | - |
| chr5 | 23783500 | 23783584 | CSAR_peak_ | 12.13,9.58     | - |
| chr5 | 23783642 | 23783687 | CSAR_peak_ | 7.92           | - |
| chr5 | 23784222 | 23784309 | CSAR_peak_ | 8.39           | - |
| chr5 | 23784483 | 23784533 | CSAR_peak_ | 10.83,9.58     | - |
| chr5 | 23784626 | 23784668 | CSAR_peak_ | 7.27           | - |
| chr5 | 23801313 | 23801383 | CSAR_peak_ | 9.58           | - |
| chr5 | 23801411 | 23801468 | CSAR_peak_ | 8.39,7.27      | - |
| chr5 | 23801708 | 23801941 | CSAR_peak_ | 21.94,29.4,11. | - |
| chr5 | 23803051 | 23803148 | CSAR_peak_ | 13.51          | - |
| chr5 | 23809798 | 23809845 | CSAR_peak_ | 7.27           | - |
| chr5 | 23809933 | 23809961 | CSAR_peak_ | 7.27           | - |
| chr5 | 23812542 | 23812591 | CSAR_peak_ | 6.21           | - |
| chr5 | 23813113 | 23813161 | CSAR_peak_ | 12.13,14.88    | - |
| chr5 | 23847726 | 23847785 | CSAR_peak_ | 6.37           | - |
| chr5 | 23915930 | 23915997 | CSAR_peak_ | 7.27           | - |
| chr5 | 23920282 | 23920336 | CSAR_peak_ | 8.28           | - |
| chr5 | 23920989 | 23921066 | CSAR_peak_ | 7.27,16.33     | - |
| chr5 | 23982979 | 23983040 | CSAR_peak_ | 7.27           | - |
| chr5 | 23983301 | 23983332 | CSAR_peak_ | 6.21           | - |
| chr5 | 23983545 | 23983686 | CSAR_peak_ | 13.48,9.41     | - |
| chr5 | 23983835 | 23983876 | CSAR_peak_ | 6.57           | - |
| chr5 | 23984046 | 23984115 | CSAR_peak_ | 13.51,12.13    | - |
| chr5 | 23984194 | 23984260 | CSAR_peak_ | 6.21           | - |
| chr5 | 23984379 | 23984448 | CSAR_peak_ | 7.58,8.39      | - |
| chr5 | 23996467 | 23996530 | CSAR_peak_ | 7.27           | - |
| chr5 | 23996601 | 23996662 | CSAR_peak_ | 7              | - |
| chr5 | 23996807 | 23996871 | CSAR_peak_ | 7.34,6.21      | - |
| chr5 | 23998666 | 23998735 | CSAR_peak_ | 7.27           | - |
| chr5 | 23998760 | 23998818 | CSAR_peak_ | 9.55,7.26      | - |
| chr5 | 23998850 | 23998904 | CSAR_peak_ | 9.55           | - |
| chr5 | 23999147 | 23999228 | CSAR_peak_ | 8.39,17.82     | - |

|      |          |          |            |               |   |
|------|----------|----------|------------|---------------|---|
| chr5 | 23999382 | 23999422 | CSAR_peak_ | 7.27          | - |
| chr5 | 24016179 | 24016229 | CSAR_peak_ | 12.17         | - |
| chr5 | 24064090 | 24064137 | CSAR_peak_ | 7.27,6.03     | - |
| chr5 | 24064366 | 24064434 | CSAR_peak_ | 10.83         | - |
| chr5 | 24064461 | 24064581 | CSAR_peak_ | 12.59,8.28,7. | - |
| chr5 | 24064819 | 24064855 | CSAR_peak_ | 6.21          | - |
| chr5 | 24065393 | 24065465 | CSAR_peak_ | 6.03,6.21     | - |
| chr5 | 24065525 | 24065600 | CSAR_peak_ | 17.82         | - |
| chr5 | 24065889 | 24065945 | CSAR_peak_ | 6.03,14.88    | - |
| chr5 | 24079513 | 24079580 | CSAR_peak_ | 20.94,6.21    | - |
| chr5 | 24079932 | 24080010 | CSAR_peak_ | 7.27,7.27     | - |
| chr5 | 24080011 | 24080047 | CSAR_peak_ | 6.03          | - |
| chr5 | 24080387 | 24080437 | CSAR_peak_ | 9.84          | - |
| chr5 | 24080502 | 24080556 | CSAR_peak_ | 17.82,16.11   | - |
| chr5 | 24080837 | 24080866 | CSAR_peak_ | 6.21          | - |
| chr5 | 24082491 | 24082529 | CSAR_peak_ | 7.27          | - |
| chr5 | 24082560 | 24082665 | CSAR_peak_ | 8.28,10.33,5. | - |
| chr5 | 24082666 | 24082740 | CSAR_peak_ | 6.45,12.22    | - |
| chr5 | 24082798 | 24082931 | CSAR_peak_ | 9.58,9.72     | - |
| chr5 | 24082969 | 24083058 | CSAR_peak_ | 10.83,19.36   | - |
| chr5 | 24083100 | 24083144 | CSAR_peak_ | 20.43,8.65    | - |
| chr5 | 24083198 | 24083268 | CSAR_peak_ | 8.2,6.13      | - |
| chr5 | 24083292 | 24083342 | CSAR_peak_ | 14.88,10.25   | - |
| chr5 | 24107643 | 24107696 | CSAR_peak_ | 10.95         | - |
| chr5 | 24107842 | 24107901 | CSAR_peak_ | 6.21          | - |
| chr5 | 24108006 | 24108095 | CSAR_peak_ | 10.02,8.39    | - |
| chr5 | 24108507 | 24108545 | CSAR_peak_ | 5.86          | - |
| chr5 | 24142049 | 24142101 | CSAR_peak_ | 19.36,9.58    | - |
| chr5 | 24142120 | 24142160 | CSAR_peak_ | 12.13         | - |
| chr5 | 24142169 | 24142244 | CSAR_peak_ | 8.39          | - |
| chr5 | 24142352 | 24142403 | CSAR_peak_ | 7.27          | - |
| chr5 | 24142452 | 24142603 | CSAR_peak_ | 20.43,12.31,; | - |
| chr5 | 24142761 | 24142768 | CSAR_peak_ | 8.39          | - |
| chr5 | 24142828 | 24142895 | CSAR_peak_ | 17.1,8.3      | - |
| chr5 | 24142981 | 24143045 | CSAR_peak_ | 9.8,9.77,24.1 | - |
| chr5 | 24143137 | 24143204 | CSAR_peak_ | 11.34,17.1    | - |
| chr5 | 24143314 | 24143369 | CSAR_peak_ | 6.21          | - |
| chr5 | 24143445 | 24143502 | CSAR_peak_ | 8.65          | - |
| chr5 | 24143506 | 24143600 | CSAR_peak_ | 10.83,8.28    | - |
| chr5 | 24144015 | 24144224 | CSAR_peak_ | 22.58,25.07   | - |
| chr5 | 24144353 | 24144413 | CSAR_peak_ | 12.13         | - |
| chr5 | 24144479 | 24144756 | CSAR_peak_ | 20.18,22.52,; | - |

|      |          |          |            |                   |   |
|------|----------|----------|------------|-------------------|---|
| chr5 | 24145048 | 24145113 | CSAR_peak_ | 21.56,13          | - |
| chr5 | 24169210 | 24169270 | CSAR_peak_ | 7.27,7.27         | - |
| chr5 | 24172317 | 24172367 | CSAR_peak_ | 7.27              | - |
| chr5 | 24172523 | 24172599 | CSAR_peak_ | 9.55,5.86         | - |
| chr5 | 24172634 | 24172714 | CSAR_peak_ | 7.27              | - |
| chr5 | 24275088 | 24275137 | CSAR_peak_ | 7.27              | - |
| chr5 | 24275698 | 24275757 | CSAR_peak_ | 9.58              | - |
| chr5 | 24308699 | 24308742 | CSAR_peak_ | 12.13             | - |
| chr5 | 24308809 | 24308858 | CSAR_peak_ | 17.82,7.58        | - |
| chr5 | 24310307 | 24310379 | CSAR_peak_ | 17.82,7.27,19.36  | - |
| chr5 | 24337746 | 24337783 | CSAR_peak_ | 9.58              | - |
| chr5 | 24338546 | 24338588 | CSAR_peak_ | 12.13             | - |
| chr5 | 24371033 | 24371092 | CSAR_peak_ | 7.27              | - |
| chr5 | 24371138 | 24371348 | CSAR_peak_ | 16.11,12.13,19.36 | - |
| chr5 | 24371440 | 24371471 | CSAR_peak_ | 9.58              | - |
| chr5 | 24371575 | 24371641 | CSAR_peak_ | 9.58              | - |
| chr5 | 24371802 | 24371902 | CSAR_peak_ | 14.76,8.28        | - |
| chr5 | 24371960 | 24372029 | CSAR_peak_ | 10.83,12.13       | - |
| chr5 | 24372132 | 24372207 | CSAR_peak_ | 7.27,9.58         | - |
| chr5 | 24372325 | 24372412 | CSAR_peak_ | 6.21,13.51,19.36  | - |
| chr5 | 24372547 | 24372607 | CSAR_peak_ | 19.36             | - |
| chr5 | 24372626 | 24372636 | CSAR_peak_ | 7.27              | - |
| chr5 | 24372730 | 24372849 | CSAR_peak_ | 10.83,12.13,19.36 | - |
| chr5 | 24372958 | 24373083 | CSAR_peak_ | 12.13,22.56       | - |
| chr5 | 24373191 | 24373271 | CSAR_peak_ | 8.65,11.66        | - |
| chr5 | 24373300 | 24373321 | CSAR_peak_ | 7.27              | - |
| chr5 | 24373365 | 24373451 | CSAR_peak_ | 31.2,19.36        | - |
| chr5 | 24373468 | 24373549 | CSAR_peak_ | 7.27              | - |
| chr5 | 24373748 | 24373797 | CSAR_peak_ | 8.28              | - |
| chr5 | 24403521 | 24403571 | CSAR_peak_ | 7.27              | - |
| chr5 | 24453752 | 24453860 | CSAR_peak_ | 13.44,9.77        | - |
| chr5 | 24454107 | 24454151 | CSAR_peak_ | 11.14             | - |
| chr5 | 24454294 | 24454377 | CSAR_peak_ | 14.88,8.39        | - |
| chr5 | 24454775 | 24454844 | CSAR_peak_ | 17.82             | - |
| chr5 | 24454953 | 24454983 | CSAR_peak_ | 6.57              | - |
| chr5 | 24454990 | 24455005 | CSAR_peak_ | 6.87              | - |
| chr5 | 24455006 | 24455089 | CSAR_peak_ | 14.88             | - |
| chr5 | 24455562 | 24455618 | CSAR_peak_ | 13.48             | - |
| chr5 | 24511265 | 24511306 | CSAR_peak_ | 13.48             | - |
| chr5 | 24511728 | 24511766 | CSAR_peak_ | 16.33             | - |
| chr5 | 24511840 | 24511855 | CSAR_peak_ | 9.58              | - |
| chr5 | 24511907 | 24512029 | CSAR_peak_ | 12.13,8.44        | - |

|      |          |          |            |              |   |
|------|----------|----------|------------|--------------|---|
| chr5 | 24512198 | 24512290 | CSAR_peak_ | 18.61,17.82  | - |
| chr5 | 24512347 | 24512374 | CSAR_peak_ | 7.27         | - |
| chr5 | 24512464 | 24512527 | CSAR_peak_ | 26.69,16.11  | - |
| chr5 | 24512709 | 24512823 | CSAR_peak_ | 17.82,19.36  | - |
| chr5 | 24512893 | 24512918 | CSAR_peak_ | 12.13,19.36  | - |
| chr5 | 24512959 | 24513185 | CSAR_peak_ | 25.91,12.74, | - |
| chr5 | 24513190 | 24513265 | CSAR_peak_ | 6.21         | - |
| chr5 | 24513855 | 24513904 | CSAR_peak_ | 19.36        | - |
| chr5 | 24548749 | 24548803 | CSAR_peak_ | 6.21         | - |
| chr5 | 24557862 | 24557908 | CSAR_peak_ | 6.57         | - |
| chr5 | 24557995 | 24558053 | CSAR_peak_ | 13.51,10.02  | - |
| chr5 | 24604420 | 24604533 | CSAR_peak_ | 17.51,10.94  | - |
| chr5 | 24604599 | 24604608 | CSAR_peak_ | 9.58         | - |
| chr5 | 24604828 | 24604880 | CSAR_peak_ | 9.58         | - |
| chr5 | 24605742 | 24605825 | CSAR_peak_ | 10.83        | - |
| chr5 | 24607060 | 24607103 | CSAR_peak_ | 8.09         | - |
| chr5 | 24639404 | 24639452 | CSAR_peak_ | 7.27         | - |
| chr5 | 24639587 | 24639646 | CSAR_peak_ | 8.44         | - |
| chr5 | 24639691 | 24639766 | CSAR_peak_ | 21.78,8.13   | - |
| chr5 | 24640211 | 24640237 | CSAR_peak_ | 6.03         | - |
| chr5 | 24640254 | 24640312 | CSAR_peak_ | 12.6         | - |
| chr5 | 24654183 | 24654446 | CSAR_peak_ | 30.74,23.96, | - |
| chr5 | 24654458 | 24654545 | CSAR_peak_ | 26.06,32.96, | - |
| chr5 | 24659710 | 24659806 | CSAR_peak_ | 10.82        | - |
| chr5 | 24659929 | 24659939 | CSAR_peak_ | 6.57         | - |
| chr5 | 24660023 | 24660082 | CSAR_peak_ | 10.95,7.27   | - |
| chr5 | 24660347 | 24660402 | CSAR_peak_ | 12.31,24.52  | - |
| chr5 | 24660436 | 24660606 | CSAR_peak_ | 11.14,14.51, | - |
| chr5 | 24660635 | 24660695 | CSAR_peak_ | 20.18,13.44, | - |
| chr5 | 24683800 | 24683859 | CSAR_peak_ | 7.27,12.13   | - |
| chr5 | 24684048 | 24684135 | CSAR_peak_ | 13.48        | - |
| chr5 | 24684228 | 24684271 | CSAR_peak_ | 8.65         | - |
| chr5 | 24684563 | 24684651 | CSAR_peak_ | 14.88        | - |
| chr5 | 24684735 | 24684819 | CSAR_peak_ | 14.88        | - |
| chr5 | 24684945 | 24685032 | CSAR_peak_ | 14,8.65      | - |
| chr5 | 24685113 | 24685195 | CSAR_peak_ | 7.7,8.92     | - |
| chr5 | 24685393 | 24685475 | CSAR_peak_ | 23.03,9.58   | - |
| chr5 | 24685810 | 24685864 | CSAR_peak_ | 10.83        | - |
| chr5 | 24690720 | 24690797 | CSAR_peak_ | 10.62        | - |
| chr5 | 24709070 | 24709141 | CSAR_peak_ | 11.33,31.32, | - |
| chr5 | 24709217 | 24709297 | CSAR_peak_ | 34.08,11.21  | - |
| chr5 | 24710908 | 24710950 | CSAR_peak_ | 6.02         | - |



|      |          |          |            |               |   |
|------|----------|----------|------------|---------------|---|
| chr5 | 24711053 | 24711166 | CSAR_peak_ | 8.65,7.34     | - |
| chr5 | 24711559 | 24711608 | CSAR_peak_ | 14.76,11.38   | - |
| chr5 | 24711610 | 24711662 | CSAR_peak_ | 6.21          | - |
| chr5 | 24712773 | 24712832 | CSAR_peak_ | 18.95,19.36   | - |
| chr5 | 24713405 | 24713604 | CSAR_peak_ | 82.38,9.52,84 | - |
| chr5 | 24733144 | 24733194 | CSAR_peak_ | 7.27          | - |
| chr5 | 24734043 | 24734108 | CSAR_peak_ | 10.02,9.77    | - |
| chr5 | 24734210 | 24734299 | CSAR_peak_ | 10.83         | - |
| chr5 | 24734391 | 24734461 | CSAR_peak_ | 18.95         | - |
| chr5 | 24734641 | 24734715 | CSAR_peak_ | 9.58          | - |
| chr5 | 24735087 | 24735099 | CSAR_peak_ | 9.58          | - |
| chr5 | 24735202 | 24735296 | CSAR_peak_ | 13.6,16.19,6. | - |
| chr5 | 24735576 | 24735621 | CSAR_peak_ | 12.23         | - |
| chr5 | 24735681 | 24735718 | CSAR_peak_ | 7.27          | - |
| chr5 | 24735820 | 24735927 | CSAR_peak_ | 12.59,6.21    | - |
| chr5 | 24735953 | 24735999 | CSAR_peak_ | 5.86          | - |
| chr5 | 24736023 | 24736059 | CSAR_peak_ | 10.83         | - |
| chr5 | 24737473 | 24737521 | CSAR_peak_ | 7.27          | - |
| chr5 | 24737713 | 24737747 | CSAR_peak_ | 6.21          | - |
| chr5 | 24738339 | 24738353 | CSAR_peak_ | 7.92          | - |
| chr5 | 24764055 | 24764110 | CSAR_peak_ | 7.58          | - |
| chr5 | 24764152 | 24764239 | CSAR_peak_ | 14.88,14.08   | - |
| chr5 | 24764545 | 24764773 | CSAR_peak_ | 17.19,28.62,; | - |
| chr5 | 24764808 | 24764892 | CSAR_peak_ | 19.21,12.95   | - |
| chr5 | 24764930 | 24765024 | CSAR_peak_ | 15.68,16.19   | - |
| chr5 | 24766747 | 24766832 | CSAR_peak_ | 9.58          | - |
| chr5 | 24766982 | 24767063 | CSAR_peak_ | 7.27,6.21     | - |
| chr5 | 24779725 | 24779802 | CSAR_peak_ | 12.13         | - |
| chr5 | 24782697 | 24782800 | CSAR_peak_ | 17.7,18.85,6. | - |
| chr5 | 24827693 | 24827712 | CSAR_peak_ | 7.58          | - |
| chr5 | 24827992 | 24828093 | CSAR_peak_ | 8.95,6.95     | - |
| chr5 | 24828362 | 24828568 | CSAR_peak_ | 25.62,21.56   | - |
| chr5 | 24828987 | 24829043 | CSAR_peak_ | 14.88         | - |
| chr5 | 24829061 | 24829089 | CSAR_peak_ | 19.36,7.26    | - |
| chr5 | 24829386 | 24829438 | CSAR_peak_ | 10.31,17.82   | - |
| chr5 | 24830219 | 24830268 | CSAR_peak_ | 7.27          | - |
| chr5 | 24831960 | 24832021 | CSAR_peak_ | 7.27,11.66    | - |
| chr5 | 24832104 | 24832215 | CSAR_peak_ | 16.11,17.37,; | - |
| chr5 | 24832264 | 24832320 | CSAR_peak_ | 6.21          | - |
| chr5 | 24832406 | 24832508 | CSAR_peak_ | 7.27,10.83    | - |
| chr5 | 24832514 | 24832582 | CSAR_peak_ | 12.59         | - |
| chr5 | 24832946 | 24833004 | CSAR_peak_ | 20.94,25.07   | - |

|      |          |          |            |               |   |
|------|----------|----------|------------|---------------|---|
| chr5 | 24833354 | 24833391 | CSAR_peak_ | 6.21          | - |
| chr5 | 24833411 | 24833533 | CSAR_peak_ | 24.52,12.13   | - |
| chr5 | 24833618 | 24833703 | CSAR_peak_ | 12.13,6.57    | - |
| chr5 | 24833782 | 24833835 | CSAR_peak_ | 9.58          | - |
| chr5 | 24834752 | 24834819 | CSAR_peak_ | 12.31         | - |
| chr5 | 24834822 | 24834903 | CSAR_peak_ | 12.31         | - |
| chr5 | 24834920 | 24834982 | CSAR_peak_ | 10.83         | - |
| chr5 | 24834983 | 24835010 | CSAR_peak_ | 7.27          | - |
| chr5 | 24835103 | 24835273 | CSAR_peak_ | 10.83,14.88,  | - |
| chr5 | 24835336 | 24835379 | CSAR_peak_ | 8.65          | - |
| chr5 | 24835422 | 24835658 | CSAR_peak_ | 29.2,6.03,8.3 | - |
| chr5 | 24835794 | 24835834 | CSAR_peak_ | 7.58          | - |
| chr5 | 24835911 | 24835957 | CSAR_peak_ | 7.27          | - |
| chr5 | 24836191 | 24836242 | CSAR_peak_ | 12.17         | - |
| chr5 | 24856117 | 24856150 | CSAR_peak_ | 17.82         | - |
| chr5 | 24856152 | 24856204 | CSAR_peak_ | 12.59         | - |
| chr5 | 24856328 | 24856387 | CSAR_peak_ | 9.58          | - |
| chr5 | 24856497 | 24856564 | CSAR_peak_ | 8.14,6.03,13. | - |
| chr5 | 24856852 | 24856898 | CSAR_peak_ | 14.88,6.21    | - |
| chr5 | 24856973 | 24857016 | CSAR_peak_ | 7.27,7.27     | - |
| chr5 | 24857588 | 24857643 | CSAR_peak_ | 12.17         | - |
| chr5 | 24857751 | 24857864 | CSAR_peak_ | 9.97,14.88    | - |
| chr5 | 24858094 | 24858148 | CSAR_peak_ | 9.58          | - |
| chr5 | 24858596 | 24858651 | CSAR_peak_ | 6.21          | - |
| chr5 | 24860861 | 24860912 | CSAR_peak_ | 7.27          | - |
| chr5 | 24861063 | 24861092 | CSAR_peak_ | 7.92          | - |
| chr5 | 24879080 | 24879154 | CSAR_peak_ | 19.36,12.17   | - |
| chr5 | 24879343 | 24879431 | CSAR_peak_ | 7.92          | - |
| chr5 | 24879980 | 24880026 | CSAR_peak_ | 8.09,9.48,8.6 | - |
| chr5 | 24880039 | 24880132 | CSAR_peak_ | 7.27,8.65     | - |
| chr5 | 24880533 | 24880586 | CSAR_peak_ | 8.39          | - |
| chr5 | 24880755 | 24880804 | CSAR_peak_ | 7.58          | - |
| chr5 | 24881052 | 24881119 | CSAR_peak_ | 17.37,12.31   | - |
| chr5 | 24881158 | 24881200 | CSAR_peak_ | 7.27          | - |
| chr5 | 24881248 | 24881397 | CSAR_peak_ | 17.37,15.68   | - |
| chr5 | 24881438 | 24881445 | CSAR_peak_ | 6.21          | - |
| chr5 | 24881530 | 24881568 | CSAR_peak_ | 10.83         | - |
| chr5 | 24881774 | 24881807 | CSAR_peak_ | 6.57,5.79     | - |
| chr5 | 24881830 | 24882043 | CSAR_peak_ | 8.1,6.38,11.9 | - |
| chr5 | 24882197 | 24882282 | CSAR_peak_ | 13.48,6.03    | - |
| chr5 | 24882350 | 24882456 | CSAR_peak_ | 17.82,7.27    | - |
| chr5 | 24882474 | 24882704 | CSAR_peak_ | 13.51,19.36,  | - |

|      |          |          |            |                   |   |
|------|----------|----------|------------|-------------------|---|
| chr5 | 24882751 | 24882887 | CSAR_peak_ | 10.18,23.03       | - |
| chr5 | 24883036 | 24883071 | CSAR_peak_ | 14.88             | - |
| chr5 | 24883194 | 24883244 | CSAR_peak_ | 8.39              | - |
| chr5 | 24883456 | 24883506 | CSAR_peak_ | 8.65              | - |
| chr5 | 24883567 | 24883574 | CSAR_peak_ | 7.27              | - |
| chr5 | 24884153 | 24884183 | CSAR_peak_ | 7.27              | - |
| chr5 | 24935198 | 24935270 | CSAR_peak_ | 10.02             | - |
| chr5 | 24935317 | 24935561 | CSAR_peak_ | 14.88,24.21,14.88 | - |
| chr5 | 24935690 | 24935776 | CSAR_peak_ | 25.91,9.58        | - |
| chr5 | 24935841 | 24936028 | CSAR_peak_ | 21.24,14.76,14.88 | - |
| chr5 | 24936126 | 24936211 | CSAR_peak_ | 20.43,7.27        | - |
| chr5 | 24936234 | 24936373 | CSAR_peak_ | 8.92,15.68,14.88  | - |
| chr5 | 24936562 | 24936731 | CSAR_peak_ | 10.96,16.33,14.88 | - |
| chr5 | 24936754 | 24936823 | CSAR_peak_ | 8.28,6.44         | - |
| chr5 | 24937005 | 24937138 | CSAR_peak_ | 7.51,19.98,14.88  | - |
| chr5 | 24937227 | 24937289 | CSAR_peak_ | 25.18             | - |
| chr5 | 24937390 | 24937440 | CSAR_peak_ | 6.54,14.88        | - |
| chr5 | 24937498 | 24937550 | CSAR_peak_ | 8.39,6.21         | - |
| chr5 | 24937617 | 24937745 | CSAR_peak_ | 10.31,18.85       | - |
| chr5 | 24937892 | 24938067 | CSAR_peak_ | 17.37,21.74       | - |
| chr5 | 24938253 | 24938327 | CSAR_peak_ | 14.88,7.27        | - |
| chr5 | 24938534 | 24938723 | CSAR_peak_ | 19.36,9.58        | - |
| chr5 | 24980845 | 24980887 | CSAR_peak_ | 13.48             | - |
| chr5 | 24980960 | 24981026 | CSAR_peak_ | 9.58              | - |
| chr5 | 24981326 | 24981446 | CSAR_peak_ | 6.81,12.13,14.88  | - |
| chr5 | 24982001 | 24982072 | CSAR_peak_ | 17.37             | - |
| chr5 | 24982604 | 24982637 | CSAR_peak_ | 8.14              | - |
| chr5 | 24982655 | 24982679 | CSAR_peak_ | 6.21              | - |
| chr5 | 24982832 | 24982883 | CSAR_peak_ | 6.21,7.27         | - |
| chr5 | 24982946 | 24982979 | CSAR_peak_ | 7.27,12.13        | - |
| chr5 | 24983069 | 24983087 | CSAR_peak_ | 6.21              | - |
| chr5 | 24983448 | 24983518 | CSAR_peak_ | 9.58,9.58         | - |
| chr5 | 24983609 | 24983661 | CSAR_peak_ | 6.81              | - |
| chr5 | 25021485 | 25021540 | CSAR_peak_ | 9.58,8.39         | - |
| chr5 | 25022155 | 25022296 | CSAR_peak_ | 7.27              | - |
| chr5 | 25052347 | 25052496 | CSAR_peak_ | 6.21,10.31        | - |
| chr5 | 25053348 | 25053454 | CSAR_peak_ | 6.81              | - |
| chr5 | 25053803 | 25053842 | CSAR_peak_ | 7.27              | - |
| chr5 | 25069519 | 25069535 | CSAR_peak_ | 6.21              | - |
| chr5 | 25069865 | 25069959 | CSAR_peak_ | 12.17,11.14       | - |
| chr5 | 25070043 | 25070098 | CSAR_peak_ | 9.58,9.58         | - |
| chr5 | 25070685 | 25070744 | CSAR_peak_ | 7.27              | - |

|      |          |          |            |               |   |
|------|----------|----------|------------|---------------|---|
| chr5 | 25079432 | 25079517 | CSAR_peak_ | 12.17,8.13    | - |
| chr5 | 25079745 | 25079814 | CSAR_peak_ | 22.56,25.91   | - |
| chr5 | 25080003 | 25080082 | CSAR_peak_ | 22.58,13.85   | - |
| chr5 | 25080131 | 25080205 | CSAR_peak_ | 10.83,13.48   | - |
| chr5 | 25080337 | 25080406 | CSAR_peak_ | 16.22,16.19   | - |
| chr5 | 25080425 | 25080463 | CSAR_peak_ | 6.95,5.95     | - |
| chr5 | 25080726 | 25080809 | CSAR_peak_ | 14.88,24.21   | - |
| chr5 | 25080813 | 25080859 | CSAR_peak_ | 8.13          | - |
| chr5 | 25099879 | 25099907 | CSAR_peak_ | 6.21          | - |
| chr5 | 25099990 | 25100069 | CSAR_peak_ | 31.2          | - |
| chr5 | 25100352 | 25100411 | CSAR_peak_ | 14.76,6.21    | - |
| chr5 | 25100530 | 25100565 | CSAR_peak_ | 7.27          | - |
| chr5 | 25100656 | 25100717 | CSAR_peak_ | 6.21,12.13    | - |
| chr5 | 25101240 | 25101274 | CSAR_peak_ | 6.85          | - |
| chr5 | 25102421 | 25102465 | CSAR_peak_ | 6.44          | - |
| chr5 | 25123513 | 25123600 | CSAR_peak_ | 6.21          | - |
| chr5 | 25123768 | 25123892 | CSAR_peak_ | 6.22,10.95    | - |
| chr5 | 25124226 | 25124318 | CSAR_peak_ | 12.13,16.11   | - |
| chr5 | 25124454 | 25124531 | CSAR_peak_ | 9.58,7.27     | - |
| chr5 | 25124699 | 25124747 | CSAR_peak_ | 9.58,10.83    | - |
| chr5 | 25124829 | 25124890 | CSAR_peak_ | 13.48,7.58    | - |
| chr5 | 25125292 | 25125397 | CSAR_peak_ | 6.21,12.13    | - |
| chr5 | 25126387 | 25126471 | CSAR_peak_ | 7.27,16.25    | - |
| chr5 | 25127803 | 25127842 | CSAR_peak_ | 12.13         | - |
| chr5 | 25128385 | 25128449 | CSAR_peak_ | 14.88         | - |
| chr5 | 25128604 | 25128674 | CSAR_peak_ | 9.77          | - |
| chr5 | 25130016 | 25130040 | CSAR_peak_ | 6.21          | - |
| chr5 | 25130516 | 25130562 | CSAR_peak_ | 25.91,6.02    | - |
| chr5 | 25131034 | 25131133 | CSAR_peak_ | 20.79,31.48   | - |
| chr5 | 25132475 | 25132520 | CSAR_peak_ | 7.27          | - |
| chr5 | 25145556 | 25145603 | CSAR_peak_ | 6.21          | - |
| chr5 | 25149750 | 25149812 | CSAR_peak_ | 6.21          | - |
| chr5 | 25150315 | 25150386 | CSAR_peak_ | 9.58,7.27     | - |
| chr5 | 25151041 | 25151094 | CSAR_peak_ | 16.33         | - |
| chr5 | 25151170 | 25151214 | CSAR_peak_ | 22.56         | - |
| chr5 | 25151546 | 25151647 | CSAR_peak_ | 7.34,8.14     | - |
| chr5 | 25205915 | 25205977 | CSAR_peak_ | 8.39          | - |
| chr5 | 25214612 | 25214699 | CSAR_peak_ | 12.17,6.21    | - |
| chr5 | 25215053 | 25215092 | CSAR_peak_ | 5.86          | - |
| chr5 | 25215452 | 25215492 | CSAR_peak_ | 6.21          | - |
| chr5 | 25215652 | 25215715 | CSAR_peak_ | 7.58          | - |
| chr5 | 25216210 | 25216354 | CSAR_peak_ | 12.74,10.18,( | - |

|      |          |          |            |                |   |
|------|----------|----------|------------|----------------|---|
| chr5 | 25216596 | 25216668 | CSAR_peak_ | 16.33,9.77     | - |
| chr5 | 25216810 | 25216857 | CSAR_peak_ | 16.33,9.58     | - |
| chr5 | 25252533 | 25252572 | CSAR_peak_ | 7.27           | - |
| chr5 | 25252700 | 25252748 | CSAR_peak_ | 10.02,8.39     | - |
| chr5 | 25253678 | 25253974 | CSAR_peak_ | 17.82,6.81,1.  | - |
| chr5 | 25254021 | 25254098 | CSAR_peak_ | 9.58,8.28      | - |
| chr5 | 25254116 | 25254178 | CSAR_peak_ | 22.52,14.88    | - |
| chr5 | 25263761 | 25263807 | CSAR_peak_ | 6.21           | - |
| chr5 | 25281428 | 25281525 | CSAR_peak_ | 13.48,10.83    | - |
| chr5 | 25281755 | 25281810 | CSAR_peak_ | 9.58           | - |
| chr5 | 25283259 | 25283300 | CSAR_peak_ | 9.58           | - |
| chr5 | 25284137 | 25284178 | CSAR_peak_ | 6.21,7.27      | - |
| chr5 | 25284468 | 25284527 | CSAR_peak_ | 14.88          | - |
| chr5 | 25284559 | 25284629 | CSAR_peak_ | 8.39,12.13     | - |
| chr5 | 25284634 | 25284745 | CSAR_peak_ | 6.03,13.48     | - |
| chr5 | 25285010 | 25285061 | CSAR_peak_ | 7.27           | - |
| chr5 | 25285066 | 25285139 | CSAR_peak_ | 7.58,7.27      | - |
| chr5 | 25285263 | 25285337 | CSAR_peak_ | 11.14,13.48    | - |
| chr5 | 25285552 | 25285660 | CSAR_peak_ | 14.88,5.86     | - |
| chr5 | 25285897 | 25285975 | CSAR_peak_ | 6.21           | - |
| chr5 | 25291054 | 25291169 | CSAR_peak_ | 47.63,26.32,.- | - |
| chr5 | 25301453 | 25301532 | CSAR_peak_ | 10.83,10.82    | - |
| chr5 | 25301724 | 25301772 | CSAR_peak_ | 9.58           | - |
| chr5 | 25301947 | 25301991 | CSAR_peak_ | 7.27           | - |
| chr5 | 25316109 | 25316147 | CSAR_peak_ | 8.39           | - |
| chr5 | 25316593 | 25316636 | CSAR_peak_ | 7.27,7         | - |
| chr5 | 25316710 | 25316736 | CSAR_peak_ | 7.27           | - |
| chr5 | 25317693 | 25317737 | CSAR_peak_ | 6.21           | - |
| chr5 | 25318227 | 25318278 | CSAR_peak_ | 12.13          | - |
| chr5 | 25319969 | 25320025 | CSAR_peak_ | 7.27           | - |
| chr5 | 25320264 | 25320308 | CSAR_peak_ | 7              | - |
| chr5 | 25320745 | 25320804 | CSAR_peak_ | 6.21           | - |
| chr5 | 25322016 | 25322066 | CSAR_peak_ | 7.27           | - |
| chr5 | 25332293 | 25332328 | CSAR_peak_ | 7.27           | - |
| chr5 | 25333164 | 25333339 | CSAR_peak_ | 6.21,20.94,9.- | - |
| chr5 | 25333379 | 25333565 | CSAR_peak_ | 27.64,26.54    | - |
| chr5 | 25333573 | 25333596 | CSAR_peak_ | 8.39           | - |
| chr5 | 25333628 | 25333778 | CSAR_peak_ | 12.59,14.88,.- | - |
| chr5 | 25333924 | 25334325 | CSAR_peak_ | 32.86,28.94,.- | - |
| chr5 | 25334355 | 25334878 | CSAR_peak_ | 8.14,52.03,5.- | - |
| chr5 | 25335026 | 25335195 | CSAR_peak_ | 31.2,31.72,7.- | - |
| chr5 | 25335264 | 25335355 | CSAR_peak_ | 29.16,46.25    | - |

|      |          |          |            |                |   |
|------|----------|----------|------------|----------------|---|
| chr5 | 25335381 | 25335418 | CSAR_peak_ | 7.27           | - |
| chr5 | 25354194 | 25354250 | CSAR_peak_ | 8.39           | - |
| chr5 | 25369450 | 25369637 | CSAR_peak_ | 10.02,16.11,,- |   |
| chr5 | 25369659 | 25369785 | CSAR_peak_ | 14.88,13.48    | - |
| chr5 | 25369840 | 25369910 | CSAR_peak_ | 17.82,14.76    | - |
| chr5 | 25369968 | 25370017 | CSAR_peak_ | 7.27           | - |
| chr5 | 25370071 | 25370112 | CSAR_peak_ | 7.27           | - |
| chr5 | 25370337 | 25370429 | CSAR_peak_ | 12.13,12.59,,- |   |
| chr5 | 25370955 | 25371000 | CSAR_peak_ | 6.03           | - |
| chr5 | 25371134 | 25371253 | CSAR_peak_ | 7.27,7.92,7.4- |   |
| chr5 | 25371307 | 25371475 | CSAR_peak_ | 13.32,6.21     | - |
| chr5 | 25371694 | 25371755 | CSAR_peak_ | 17.37          | - |
| chr5 | 25371769 | 25371855 | CSAR_peak_ | 10.83,7.27     | - |
| chr5 | 25372025 | 25372079 | CSAR_peak_ | 20.94,7.27     | - |
| chr5 | 25372615 | 25372705 | CSAR_peak_ | 8.1,12.31      | - |
| chr5 | 25372889 | 25372910 | CSAR_peak_ | 7.27           | - |
| chr5 | 25373014 | 25373069 | CSAR_peak_ | 10.02          | - |
| chr5 | 25373130 | 25373217 | CSAR_peak_ | 6.21,9.58,6.0- |   |
| chr5 | 25373258 | 25373314 | CSAR_peak_ | 9.58           | - |
| chr5 | 25373350 | 25373401 | CSAR_peak_ | 7.29,17.4      | - |
| chr5 | 25373599 | 25373622 | CSAR_peak_ | 7.58           | - |
| chr5 | 25373653 | 25373730 | CSAR_peak_ | 9.58           | - |
| chr5 | 25373764 | 25373896 | CSAR_peak_ | 28.62,6.44,3(- |   |
| chr5 | 25373945 | 25374009 | CSAR_peak_ | 9.58,7.27      | - |
| chr5 | 25374108 | 25374167 | CSAR_peak_ | 12.13          | - |
| chr5 | 25374277 | 25374376 | CSAR_peak_ | 9.58,14.88     | - |
| chr5 | 25374393 | 25374826 | CSAR_peak_ | 41.69,31.19,,- |   |
| chr5 | 25374861 | 25375708 | CSAR_peak_ | 37.04,9.94,7.- |   |
| chr5 | 25375744 | 25375841 | CSAR_peak_ | 39.3,10.33     | - |
| chr5 | 25375929 | 25375963 | CSAR_peak_ | 18.65          | - |
| chr5 | 25375982 | 25376006 | CSAR_peak_ | 6.54           | - |
| chr5 | 25376057 | 25376274 | CSAR_peak_ | 16.92,27.64,,- |   |
| chr5 | 25376275 | 25376300 | CSAR_peak_ | 7.27           | - |
| chr5 | 25376334 | 25376440 | CSAR_peak_ | 19.36,31.2     | - |
| chr5 | 25376459 | 25376594 | CSAR_peak_ | 14.88,17.99,,- |   |
| chr5 | 25376752 | 25376823 | CSAR_peak_ | 8.39,16.25     | - |
| chr5 | 25376875 | 25376981 | CSAR_peak_ | 14.25,25.91    | - |
| chr5 | 25377038 | 25377160 | CSAR_peak_ | 14.88,12.13,,- |   |
| chr5 | 25377221 | 25377306 | CSAR_peak_ | 7.58,27.64     | - |
| chr5 | 25377329 | 25377411 | CSAR_peak_ | 14.85,18.65    | - |
| chr5 | 25377459 | 25377957 | CSAR_peak_ | 45.61,40.88,,- |   |
| chr5 | 25377983 | 25378047 | CSAR_peak_ | 10.31,12.31    | - |

|      |          |          |            |              |   |
|------|----------|----------|------------|--------------|---|
| chr5 | 25378118 | 25378165 | CSAR_peak_ | 8.28         | - |
| chr5 | 25378248 | 25378326 | CSAR_peak_ | 9.58         | - |
| chr5 | 25378339 | 25378869 | CSAR_peak_ | 42.64,38.71, | - |
| chr5 | 25378890 | 25379142 | CSAR_peak_ | 28.34,12.31, | - |
| chr5 | 25384057 | 25384199 | CSAR_peak_ | 12.13,10.95  | - |
| chr5 | 25384286 | 25384354 | CSAR_peak_ | 14.88,7.27   | - |
| chr5 | 25384362 | 25384464 | CSAR_peak_ | 10.17,17.35  | - |
| chr5 | 25384725 | 25384832 | CSAR_peak_ | 12.13,19.36  | - |
| chr5 | 25384869 | 25384984 | CSAR_peak_ | 35.08,35.38  | - |
| chr5 | 25385007 | 25385135 | CSAR_peak_ | 26.69,22.69  | - |
| chr5 | 25385181 | 25385386 | CSAR_peak_ | 22.56,27.77, | - |
| chr5 | 25385428 | 25385536 | CSAR_peak_ | 9.77,13.51   | - |
| chr5 | 25385543 | 25385676 | CSAR_peak_ | 13.66,32.88, | - |
| chr5 | 25385712 | 25385744 | CSAR_peak_ | 14.92,7.27   | - |
| chr5 | 25385800 | 25386181 | CSAR_peak_ | 24.72,42.05  | - |
| chr5 | 25386197 | 25386455 | CSAR_peak_ | 9.61,11.07,1 | - |
| chr5 | 25386475 | 25386565 | CSAR_peak_ | 17.87,24.21  | - |
| chr5 | 25386612 | 25386753 | CSAR_peak_ | 25.34,21.68, | - |
| chr5 | 25387139 | 25387189 | CSAR_peak_ | 6.21         | - |
| chr5 | 25388418 | 25388494 | CSAR_peak_ | 9.58,7.27    | - |
| chr5 | 25388642 | 25388695 | CSAR_peak_ | 10.83,9.58   | - |
| chr5 | 25388726 | 25388796 | CSAR_peak_ | 10.83        | - |
| chr5 | 25388819 | 25388832 | CSAR_peak_ | 7.27         | - |
| chr5 | 25388971 | 25389028 | CSAR_peak_ | 6.21         | - |
| chr5 | 25391436 | 25391498 | CSAR_peak_ | 13.48        | - |
| chr5 | 25391535 | 25391580 | CSAR_peak_ | 7.27         | - |
| chr5 | 25393470 | 25393571 | CSAR_peak_ | 20.94,11.38  | - |
| chr5 | 25393645 | 25393681 | CSAR_peak_ | 10.83        | - |
| chr5 | 25393706 | 25393757 | CSAR_peak_ | 13.48        | - |
| chr5 | 25393792 | 25393819 | CSAR_peak_ | 10.31        | - |
| chr5 | 25393918 | 25393958 | CSAR_peak_ | 17.82,8.39   | - |
| chr5 | 25393977 | 25394024 | CSAR_peak_ | 6.21         | - |
| chr5 | 25394142 | 25394210 | CSAR_peak_ | 7.27         | - |
| chr5 | 25395463 | 25395507 | CSAR_peak_ | 12.31        | - |
| chr5 | 25396429 | 25396546 | CSAR_peak_ | 6.21         | - |
| chr5 | 25408934 | 25408980 | CSAR_peak_ | 6.21         | - |
| chr5 | 25409103 | 25409146 | CSAR_peak_ | 12.13        | - |
| chr5 | 25409276 | 25409289 | CSAR_peak_ | 6.95         | - |
| chr5 | 25409363 | 25409438 | CSAR_peak_ | 9.58,6.21    | - |
| chr5 | 25409500 | 25409612 | CSAR_peak_ | 13.48,12.13  | - |
| chr5 | 25409675 | 25409716 | CSAR_peak_ | 7.27         | - |
| chr5 | 25409766 | 25409833 | CSAR_peak_ | 17.37        | - |

|      |          |          |            |                 |   |
|------|----------|----------|------------|-----------------|---|
| chr5 | 25413586 | 25413645 | CSAR_peak_ | 6.95            | - |
| chr5 | 25413864 | 25413898 | CSAR_peak_ | 7.58            | - |
| chr5 | 25414024 | 25414078 | CSAR_peak_ | 6.03,7.27       | - |
| chr5 | 25414203 | 25414273 | CSAR_peak_ | 12.13           | - |
| chr5 | 25418789 | 25418812 | CSAR_peak_ | 9.58            | - |
| chr5 | 25419279 | 25419319 | CSAR_peak_ | 13.48           | - |
| chr5 | 25419400 | 25419439 | CSAR_peak_ | 10.95           | - |
| chr5 | 25419493 | 25419516 | CSAR_peak_ | 8.14            | - |
| chr5 | 25419620 | 25419688 | CSAR_peak_ | 9.77,10.12,3(-  | - |
| chr5 | 25419718 | 25419764 | CSAR_peak_ | 14.88,10.83     | - |
| chr5 | 25419987 | 25420102 | CSAR_peak_ | 8.14,9.61,28.-  | - |
| chr5 | 25420220 | 25420287 | CSAR_peak_ | 19.36,7         | - |
| chr5 | 25420620 | 25420691 | CSAR_peak_ | 10.02           | - |
| chr5 | 25420835 | 25420888 | CSAR_peak_ | 10.83           | - |
| chr5 | 25421135 | 25421164 | CSAR_peak_ | 9.58            | - |
| chr5 | 25421262 | 25421304 | CSAR_peak_ | 10.83           | - |
| chr5 | 25421339 | 25421378 | CSAR_peak_ | 7.58            | - |
| chr5 | 25421502 | 25421571 | CSAR_peak_ | 7.58            | - |
| chr5 | 25421878 | 25421966 | CSAR_peak_ | 13.48           | - |
| chr5 | 25460181 | 25460250 | CSAR_peak_ | 6.21            | - |
| chr5 | 25461976 | 25462030 | CSAR_peak_ | 8.95            | - |
| chr5 | 25466493 | 25466546 | CSAR_peak_ | 7.58            | - |
| chr5 | 25466562 | 25466572 | CSAR_peak_ | 6.21            | - |
| chr5 | 25466691 | 25466807 | CSAR_peak_ | 35.24,6.21,1(-  | - |
| chr5 | 25466813 | 25466842 | CSAR_peak_ | 6.02            | - |
| chr5 | 25466859 | 25466875 | CSAR_peak_ | 6.51            | - |
| chr5 | 25466933 | 25467058 | CSAR_peak_ | 33.47,7,25.9(-  | - |
| chr5 | 25467181 | 25467261 | CSAR_peak_ | 19.36,6.21      | - |
| chr5 | 25467482 | 25467576 | CSAR_peak_ | 8.13            | - |
| chr5 | 25467644 | 25467730 | CSAR_peak_ | 7.27,6.21,23.-  | - |
| chr5 | 25467827 | 25467882 | CSAR_peak_ | 6.21            | - |
| chr5 | 25495048 | 25495095 | CSAR_peak_ | 7.27            | - |
| chr5 | 25525992 | 25526043 | CSAR_peak_ | 12.13           | - |
| chr5 | 25526429 | 25526506 | CSAR_peak_ | 6.03,6.03,6.1(- | - |
| chr5 | 25526587 | 25526753 | CSAR_peak_ | 13.48,10.02,-   | - |
| chr5 | 25526928 | 25527337 | CSAR_peak_ | 12.13,17.82,-   | - |
| chr5 | 25527350 | 25527919 | CSAR_peak_ | 8.14,19.21,4(-  | - |
| chr5 | 25554659 | 25554774 | CSAR_peak_ | 8.39            | - |
| chr5 | 25554806 | 25554850 | CSAR_peak_ | 6.21            | - |
| chr5 | 25555015 | 25555066 | CSAR_peak_ | 9.58            | - |
| chr5 | 25555110 | 25555159 | CSAR_peak_ | 10.02,6.81      | - |
| chr5 | 25555300 | 25555336 | CSAR_peak_ | 19.36           | - |



|      |          |          |             |                |
|------|----------|----------|-------------|----------------|
| chr5 | 25555535 | 25555654 | CSAR_peak_! | 6.85,17.82,6.- |
| chr5 | 25556092 | 25556155 | CSAR_peak_! | 13.92,12.13 -  |
| chr5 | 25556360 | 25556408 | CSAR_peak_! | 6.44 -         |
| chr5 | 25556453 | 25556539 | CSAR_peak_! | 6.85,17.82 -   |
| chr5 | 25557782 | 25557827 | CSAR_peak_! | 6.21,7.27 -    |
| chr5 | 25558132 | 25558199 | CSAR_peak_! | 7.27 -         |
| chr5 | 25561925 | 25561988 | CSAR_peak_! | 8.14 -         |
| chr5 | 25566751 | 25566812 | CSAR_peak_! | 7.27 -         |
| chr5 | 25606999 | 25607050 | CSAR_peak_! | 9.58 -         |
| chr5 | 25607369 | 25607453 | CSAR_peak_! | 6.1,10.33 -    |
| chr5 | 25607684 | 25607730 | CSAR_peak_! | 9.58 -         |
| chr5 | 25607818 | 25607871 | CSAR_peak_! | 7.27,9.58 -    |
| chr5 | 25607913 | 25607924 | CSAR_peak_! | 7.27 -         |
| chr5 | 25607997 | 25608044 | CSAR_peak_! | 8.28,14.88,6.- |
| chr5 | 25608051 | 25608110 | CSAR_peak_! | 6.87 -         |
| chr5 | 25608258 | 25608343 | CSAR_peak_! | 14.88 -        |
| chr5 | 25608684 | 25608739 | CSAR_peak_! | 7,9.58 -       |
| chr5 | 25608870 | 25608927 | CSAR_peak_! | 9.58 -         |
| chr5 | 25616906 | 25616962 | CSAR_peak_! | 8.39 -         |
| chr5 | 25617557 | 25617732 | CSAR_peak_! | 12.13,6.21,7.- |
| chr5 | 25620742 | 25620788 | CSAR_peak_! | 8.39 -         |
| chr5 | 25624288 | 25624356 | CSAR_peak_! | 7.27 -         |
| chr5 | 25628721 | 25628801 | CSAR_peak_! | 12.94 -        |
| chr5 | 25628910 | 25629180 | CSAR_peak_! | 23.89,15.21,-  |
| chr5 | 25629210 | 25629338 | CSAR_peak_! | 10.94,13.51 -  |
| chr5 | 25629351 | 25629439 | CSAR_peak_! | 17.82,22.41 -  |
| chr5 | 25630237 | 25630294 | CSAR_peak_! | 7.27 -         |
| chr5 | 25630826 | 25630899 | CSAR_peak_! | 21.94 -        |
| chr5 | 25631090 | 25631134 | CSAR_peak_! | 8.39 -         |
| chr5 | 25631374 | 25631515 | CSAR_peak_! | 21.31,24.21,-  |
| chr5 | 25631616 | 25631654 | CSAR_peak_! | 19.36,7.58 -   |
| chr5 | 25631864 | 25631875 | CSAR_peak_! | 7.27 -         |
| chr5 | 25632018 | 25632100 | CSAR_peak_! | 31.2,10.31 -   |
| chr5 | 25632191 | 25632254 | CSAR_peak_! | 25.91,10.83 -  |
| chr5 | 25632331 | 25632374 | CSAR_peak_! | 14.88 -        |
| chr5 | 25632724 | 25632792 | CSAR_peak_! | 17.82,8.14 -   |
| chr5 | 25632855 | 25632888 | CSAR_peak_! | 12.13 -        |
| chr5 | 25637254 | 25637317 | CSAR_peak_! | 8.39 -         |
| chr5 | 25637517 | 25637570 | CSAR_peak_! | 10.83 -        |
| chr5 | 25637772 | 25637795 | CSAR_peak_! | 7.58 -         |
| chr5 | 25637904 | 25637942 | CSAR_peak_! | 6.94 -         |
| chr5 | 25637954 | 25637979 | CSAR_peak_! | 9.77 -         |

|      |          |          |            |                |   |
|------|----------|----------|------------|----------------|---|
| chr5 | 25638079 | 25638157 | CSAR_peak_ | 12.13,16.11    | - |
| chr5 | 25638250 | 25638320 | CSAR_peak_ | 10.83,18.73    | - |
| chr5 | 25638604 | 25638641 | CSAR_peak_ | 6.81           | - |
| chr5 | 25639154 | 25639205 | CSAR_peak_ | 9.58           | - |
| chr5 | 25639386 | 25639441 | CSAR_peak_ | 13.48          | - |
| chr5 | 25639952 | 25640072 | CSAR_peak_ | 6.94,6.57,10.  | - |
| chr5 | 25640170 | 25640213 | CSAR_peak_ | 9.72,7.78      | - |
| chr5 | 25640532 | 25640593 | CSAR_peak_ | 6.52,13.29     | - |
| chr5 | 25641107 | 25641164 | CSAR_peak_ | 6.02,14.88     | - |
| chr5 | 25642027 | 25642051 | CSAR_peak_ | 24.21          | - |
| chr5 | 25642346 | 25642468 | CSAR_peak_ | 12.13,25.07    | - |
| chr5 | 25642535 | 25642595 | CSAR_peak_ | 21.94,8.65     | - |
| chr5 | 25642657 | 25642737 | CSAR_peak_ | 14.88,5.86,8.  | - |
| chr5 | 25642744 | 25642892 | CSAR_peak_ | 6.85,9.77,8.6  | - |
| chr5 | 25642940 | 25643001 | CSAR_peak_ | 13.66,14.88    | - |
| chr5 | 25644038 | 25644103 | CSAR_peak_ | 9.58           | - |
| chr5 | 25644218 | 25644253 | CSAR_peak_ | 9.58           | - |
| chr5 | 25651458 | 25651532 | CSAR_peak_ | 14.88          | - |
| chr5 | 25659596 | 25659631 | CSAR_peak_ | 6.03           | - |
| chr5 | 25659758 | 25659782 | CSAR_peak_ | 6.21           | - |
| chr5 | 25660258 | 25660334 | CSAR_peak_ | 12.13          | - |
| chr5 | 25660383 | 25660436 | CSAR_peak_ | 14.76          | - |
| chr5 | 25662929 | 25662980 | CSAR_peak_ | 12.13          | - |
| chr5 | 25663384 | 25663435 | CSAR_peak_ | 10.83          | - |
| chr5 | 25663799 | 25663851 | CSAR_peak_ | 9.58,7.27      | - |
| chr5 | 25664380 | 25664430 | CSAR_peak_ | 7.27           | - |
| chr5 | 25664476 | 25664533 | CSAR_peak_ | 13.32,29.4     | - |
| chr5 | 25664589 | 25664621 | CSAR_peak_ | 9.58           | - |
| chr5 | 25664672 | 25664733 | CSAR_peak_ | 6.1,10.94      | - |
| chr5 | 25664816 | 25664877 | CSAR_peak_ | 9.94           | - |
| chr5 | 25664978 | 25665107 | CSAR_peak_ | 15.56,11.03,,- | - |
| chr5 | 25665169 | 25665252 | CSAR_peak_ | 12.13,19.45,,- | - |
| chr5 | 25665259 | 25665373 | CSAR_peak_ | 22.56,12.5     | - |
| chr5 | 25665890 | 25665993 | CSAR_peak_ | 10.83          | - |
| chr5 | 25666140 | 25666198 | CSAR_peak_ | 7.78,8.92      | - |
| chr5 | 25672913 | 25672988 | CSAR_peak_ | 9.97,9.77      | - |
| chr5 | 25673165 | 25673222 | CSAR_peak_ | 7.92           | - |
| chr5 | 25673539 | 25673577 | CSAR_peak_ | 7.27           | - |
| chr5 | 25673841 | 25673890 | CSAR_peak_ | 7.58           | - |
| chr5 | 25673987 | 25674064 | CSAR_peak_ | 7.27           | - |
| chr5 | 25675422 | 25675477 | CSAR_peak_ | 7.27           | - |
| chr5 | 25676552 | 25676598 | CSAR_peak_ | 9.58           | - |

|      |          |          |            |               |   |
|------|----------|----------|------------|---------------|---|
| chr5 | 25681463 | 25681543 | CSAR_peak_ | 7.27,6.87     | - |
| chr5 | 25682347 | 25682486 | CSAR_peak_ | 6.21,6.81,7.5 | - |
| chr5 | 25682669 | 25682803 | CSAR_peak_ | 5.86,9.03     | - |
| chr5 | 25682981 | 25683048 | CSAR_peak_ | 13.48         | - |
| chr5 | 25697770 | 25697821 | CSAR_peak_ | 10.83         | - |
| chr5 | 25698075 | 25698129 | CSAR_peak_ | 12.13         | - |
| chr5 | 25698217 | 25698238 | CSAR_peak_ | 13.48         | - |
| chr5 | 25698281 | 25698308 | CSAR_peak_ | 9.58          | - |
| chr5 | 25698836 | 25698943 | CSAR_peak_ | 12.31,7.27    | - |
| chr5 | 25730856 | 25730917 | CSAR_peak_ | 6.21,9.58     | - |
| chr5 | 25732359 | 25732433 | CSAR_peak_ | 17.82         | - |
| chr5 | 25735217 | 25735261 | CSAR_peak_ | 12.13,9.58    | - |
| chr5 | 25737674 | 25737716 | CSAR_peak_ | 6.21          | - |
| chr5 | 25752633 | 25752724 | CSAR_peak_ | 7.47,8.39     | - |
| chr5 | 25753938 | 25754011 | CSAR_peak_ | 12.13         | - |
| chr5 | 25754013 | 25754072 | CSAR_peak_ | 6.45,9.58     | - |
| chr5 | 25762587 | 25762634 | CSAR_peak_ | 7.27          | - |
| chr5 | 25773718 | 25773754 | CSAR_peak_ | 6.95          | - |
| chr5 | 25807203 | 25807242 | CSAR_peak_ | 7.27          | - |
| chr5 | 25807525 | 25807574 | CSAR_peak_ | 10.83         | - |
| chr5 | 25807655 | 25807698 | CSAR_peak_ | 6.21          | - |
| chr5 | 25807792 | 25807876 | CSAR_peak_ | 14.88,7.27    | - |
| chr5 | 25808503 | 25808571 | CSAR_peak_ | 10.82         | - |
| chr5 | 25809525 | 25809569 | CSAR_peak_ | 10.83         | - |
| chr5 | 25810313 | 25810395 | CSAR_peak_ | 8.95,8.14     | - |
| chr5 | 25810475 | 25810500 | CSAR_peak_ | 7.27          | - |
| chr5 | 25810649 | 25810716 | CSAR_peak_ | 6.21,10.95    | - |
| chr5 | 25810739 | 25810843 | CSAR_peak_ | 12.31,9.58    | - |
| chr5 | 25811086 | 25811131 | CSAR_peak_ | 6.21          | - |
| chr5 | 25811275 | 25811362 | CSAR_peak_ | 10.83,13.48   | - |
| chr5 | 25811554 | 25811610 | CSAR_peak_ | 10.83,9.77    | - |
| chr5 | 25811887 | 25811938 | CSAR_peak_ | 12.13         | - |
| chr5 | 25812453 | 25812478 | CSAR_peak_ | 6.21          | - |
| chr5 | 25813079 | 25813120 | CSAR_peak_ | 6.21          | - |
| chr5 | 25828425 | 25828509 | CSAR_peak_ | 12.13,9.77    | - |
| chr5 | 25828622 | 25828690 | CSAR_peak_ | 7.27,7.27     | - |
| chr5 | 25829039 | 25829084 | CSAR_peak_ | 6.57          | - |
| chr5 | 25829828 | 25829888 | CSAR_peak_ | 6.81,12.13,9. | - |
| chr5 | 25829970 | 25830003 | CSAR_peak_ | 7.27          | - |
| chr5 | 25842060 | 25842105 | CSAR_peak_ | 7.58          | - |
| chr5 | 25842345 | 25842394 | CSAR_peak_ | 9.58          | - |
| chr5 | 25843363 | 25843413 | CSAR_peak_ | 9.58          | - |

|      |          |          |            |                  |   |
|------|----------|----------|------------|------------------|---|
| chr5 | 25914939 | 25914973 | CSAR_peak_ | 6.21             | - |
| chr5 | 25915136 | 25915177 | CSAR_peak_ | 7.58             | - |
| chr5 | 25915243 | 25915285 | CSAR_peak_ | 7.27             | - |
| chr5 | 25915455 | 25915545 | CSAR_peak_ | 8.39,8.65        | - |
| chr5 | 25916938 | 25917042 | CSAR_peak_ | 17.82            | - |
| chr5 | 25917080 | 25917172 | CSAR_peak_ | 10.02,9.48,11.02 | - |
| chr5 | 25917631 | 25917696 | CSAR_peak_ | 7.27             | - |
| chr5 | 25917844 | 25917894 | CSAR_peak_ | 10.83            | - |
| chr5 | 25917905 | 25918021 | CSAR_peak_ | 12.13,7.27       | - |
| chr5 | 25918125 | 25918240 | CSAR_peak_ | 14.59,9.58       | - |
| chr5 | 25918477 | 25918563 | CSAR_peak_ | 13.09,21.81      | - |
| chr5 | 25918565 | 25918638 | CSAR_peak_ | 17.82            | - |
| chr5 | 25918874 | 25918958 | CSAR_peak_ | 31.2             | - |
| chr5 | 25919010 | 25919071 | CSAR_peak_ | 9.58             | - |
| chr5 | 25919140 | 25919198 | CSAR_peak_ | 6.21             | - |
| chr5 | 25919322 | 25919418 | CSAR_peak_ | 17.51,30.81      | - |
| chr5 | 25925352 | 25925407 | CSAR_peak_ | 7.27             | - |
| chr5 | 25925613 | 25925685 | CSAR_peak_ | 8.39,6.21        | - |
| chr5 | 25925849 | 25925907 | CSAR_peak_ | 6.95,12.31       | - |
| chr5 | 25925957 | 25926029 | CSAR_peak_ | 6.95,14.88,7.27  | - |
| chr5 | 25926151 | 25926216 | CSAR_peak_ | 14.85,12.13      | - |
| chr5 | 25926521 | 25926620 | CSAR_peak_ | 8.39,16.33,7.27  | - |
| chr5 | 25926672 | 25926704 | CSAR_peak_ | 14.88,7.27       | - |
| chr5 | 25926805 | 25926937 | CSAR_peak_ | 8.2,5.86,14.8    | - |
| chr5 | 25927857 | 25927933 | CSAR_peak_ | 11.14,12.13      | - |
| chr5 | 25928401 | 25928443 | CSAR_peak_ | 5.86             | - |
| chr5 | 25928477 | 25928623 | CSAR_peak_ | 12.13,8.65,8.65  | - |
| chr5 | 25965374 | 25965444 | CSAR_peak_ | 10.33            | - |
| chr5 | 26010075 | 26010159 | CSAR_peak_ | 9.41,14.85       | - |
| chr5 | 26010185 | 26010202 | CSAR_peak_ | 7.27             | - |
| chr5 | 26011822 | 26011864 | CSAR_peak_ | 6.21             | - |
| chr5 | 26012028 | 26012115 | CSAR_peak_ | 8.28             | - |
| chr5 | 26012146 | 26012185 | CSAR_peak_ | 6.57             | - |
| chr5 | 26012408 | 26012491 | CSAR_peak_ | 15.28            | - |
| chr5 | 26048341 | 26048445 | CSAR_peak_ | 11.03,7.27,11.03 | - |
| chr5 | 26048592 | 26048678 | CSAR_peak_ | 9.58             | - |
| chr5 | 26049084 | 26049131 | CSAR_peak_ | 7.27             | - |
| chr5 | 26049429 | 26049498 | CSAR_peak_ | 22.56            | - |
| chr5 | 26049820 | 26049864 | CSAR_peak_ | 6.03             | - |
| chr5 | 26050450 | 26050512 | CSAR_peak_ | 25.12,17.37      | - |
| chr5 | 26050912 | 26050977 | CSAR_peak_ | 7.34,7.73        | - |
| chr5 | 26051023 | 26051182 | CSAR_peak_ | 31.72,31.65      | - |

|      |          |          |            |               |   |
|------|----------|----------|------------|---------------|---|
| chr5 | 26051200 | 26051314 | CSAR_peak_ | 31.95,24.21   | - |
| chr5 | 26051378 | 26051601 | CSAR_peak_ | 11.38,7.26,40 | - |
| chr5 | 26051736 | 26051822 | CSAR_peak_ | 12.13,12.13   | - |
| chr5 | 26051824 | 26052033 | CSAR_peak_ | 25.02,21.41   | - |
| chr5 | 26052051 | 26052267 | CSAR_peak_ | 12.13,27.61,1 | - |
| chr5 | 26052390 | 26052515 | CSAR_peak_ | 33.68,38.18   | - |
| chr5 | 26052519 | 26052571 | CSAR_peak_ | 19.32,6.73    | - |
| chr5 | 26052579 | 26052642 | CSAR_peak_ | 45.33,41.46   | - |
| chr5 | 26075135 | 26075226 | CSAR_peak_ | 22.56,6.21,7  | - |
| chr5 | 26075493 | 26075565 | CSAR_peak_ | 9.58          | - |
| chr5 | 26075659 | 26075766 | CSAR_peak_ | 13.48         | - |
| chr5 | 26075963 | 26076081 | CSAR_peak_ | 8.39          | - |
| chr5 | 26076108 | 26076176 | CSAR_peak_ | 17.82,5.86    | - |
| chr5 | 26076235 | 26076285 | CSAR_peak_ | 11.03,17.82   | - |
| chr5 | 26082648 | 26082699 | CSAR_peak_ | 6.03          | - |
| chr5 | 26082868 | 26082923 | CSAR_peak_ | 6.21          | - |
| chr5 | 26082962 | 26083014 | CSAR_peak_ | 8.14          | - |
| chr5 | 26086284 | 26086330 | CSAR_peak_ | 7.27          | - |
| chr5 | 26086585 | 26086644 | CSAR_peak_ | 7.58,8.39     | - |
| chr5 | 26086675 | 26086732 | CSAR_peak_ | 7.27          | - |
| chr5 | 26087634 | 26087732 | CSAR_peak_ | 24.21,6.21,10 | - |
| chr5 | 26087780 | 26087826 | CSAR_peak_ | 10.33         | - |
| chr5 | 26087893 | 26087930 | CSAR_peak_ | 7.27,13.48    | - |
| chr5 | 26088005 | 26088112 | CSAR_peak_ | 10.83,12.13   | - |
| chr5 | 26095279 | 26095531 | CSAR_peak_ | 31.2,10.02,10 | - |
| chr5 | 26095681 | 26095751 | CSAR_peak_ | 25.07,11.99   | - |
| chr5 | 26102217 | 26102711 | CSAR_peak_ | 12.13,7.27,10 | - |
| chr5 | 26102882 | 26102936 | CSAR_peak_ | 19.36,46.53   | - |
| chr5 | 26103204 | 26103259 | CSAR_peak_ | 7.27          | - |
| chr5 | 26103429 | 26103555 | CSAR_peak_ | 23.03,25.91   | - |
| chr5 | 26103600 | 26103676 | CSAR_peak_ | 12.61,7.18    | - |
| chr5 | 26103755 | 26103801 | CSAR_peak_ | 7.68          | - |
| chr5 | 26103954 | 26103993 | CSAR_peak_ | 6.21          | - |
| chr5 | 26123267 | 26123292 | CSAR_peak_ | 12.54,11.45   | - |
| chr5 | 26123387 | 26123477 | CSAR_peak_ | 17.35,7.58    | - |
| chr5 | 26123576 | 26123639 | CSAR_peak_ | 20.43,5.86    | - |
| chr5 | 26123703 | 26123719 | CSAR_peak_ | 9.58,6.21     | - |
| chr5 | 26123967 | 26124045 | CSAR_peak_ | 7.61,16.33    | - |
| chr5 | 26124259 | 26124361 | CSAR_peak_ | 28.34         | - |
| chr5 | 26124496 | 26124535 | CSAR_peak_ | 6.21          | - |
| chr5 | 26124565 | 26124667 | CSAR_peak_ | 10.02         | - |
| chr5 | 26124767 | 26124855 | CSAR_peak_ | 7.92,9.58,26  | - |

|      |          |          |            |                  |   |
|------|----------|----------|------------|------------------|---|
| chr5 | 26125069 | 26125156 | CSAR_peak_ | 35.97,12.31      | - |
| chr5 | 26125242 | 26125385 | CSAR_peak_ | 19.93,10.02      | - |
| chr5 | 26125452 | 26125483 | CSAR_peak_ | 16.05            | - |
| chr5 | 26125764 | 26125836 | CSAR_peak_ | 9.58             | - |
| chr5 | 26125891 | 26125962 | CSAR_peak_ | 9.58,12.13       | - |
| chr5 | 26125988 | 26126014 | CSAR_peak_ | 7.06,12.13       | - |
| chr5 | 26126077 | 26126144 | CSAR_peak_ | 14.08,17.82      | - |
| chr5 | 26126274 | 26126316 | CSAR_peak_ | 10.83            | - |
| chr5 | 26146528 | 26146594 | CSAR_peak_ | 20.43,10.83      | - |
| chr5 | 26146922 | 26146943 | CSAR_peak_ | 7.27             | - |
| chr5 | 26146980 | 26147003 | CSAR_peak_ | 9.58             | - |
| chr5 | 26147852 | 26147901 | CSAR_peak_ | 7.27,8.39        | - |
| chr5 | 26148265 | 26148310 | CSAR_peak_ | 9.58             | - |
| chr5 | 26148528 | 26148647 | CSAR_peak_ | 7.92,6.21        | - |
| chr5 | 26148687 | 26148804 | CSAR_peak_ | 11.45,12.17      | - |
| chr5 | 26149773 | 26149874 | CSAR_peak_ | 9.32,22.58       | - |
| chr5 | 26166667 | 26166713 | CSAR_peak_ | 7.27             | - |
| chr5 | 26168209 | 26168293 | CSAR_peak_ | 9.77             | - |
| chr5 | 26168461 | 26168514 | CSAR_peak_ | 7.27             | - |
| chr5 | 26169041 | 26169093 | CSAR_peak_ | 10.02            | - |
| chr5 | 26222261 | 26222311 | CSAR_peak_ | 9.58             | - |
| chr5 | 26224709 | 26224778 | CSAR_peak_ | 9.58             | - |
| chr5 | 26225895 | 26225946 | CSAR_peak_ | 9.58             | - |
| chr5 | 26226119 | 26226179 | CSAR_peak_ | 9.58,6.21        | - |
| chr5 | 26226366 | 26226403 | CSAR_peak_ | 7.27             | - |
| chr5 | 26226566 | 26226607 | CSAR_peak_ | 7.27             | - |
| chr5 | 26226646 | 26226695 | CSAR_peak_ | 7.27             | - |
| chr5 | 26226788 | 26226889 | CSAR_peak_ | 11.38,24.21      | - |
| chr5 | 26226891 | 26226976 | CSAR_peak_ | 10.83,7.58       | - |
| chr5 | 26227748 | 26227809 | CSAR_peak_ | 17.82            | - |
| chr5 | 26228074 | 26228102 | CSAR_peak_ | 6.21,7.27        | - |
| chr5 | 26244575 | 26244617 | CSAR_peak_ | 7.27             | - |
| chr5 | 26244886 | 26244963 | CSAR_peak_ | 46.53,14.85      | - |
| chr5 | 26245240 | 26245325 | CSAR_peak_ | 14.88            | - |
| chr5 | 26245366 | 26245706 | CSAR_peak_ | 7.58,63.75,14.88 | - |
| chr5 | 26246018 | 26246312 | CSAR_peak_ | 10.31,7.27,21.82 | - |
| chr5 | 26270861 | 26270945 | CSAR_peak_ | 9.58             | - |
| chr5 | 26271580 | 26271634 | CSAR_peak_ | 6.21             | - |
| chr5 | 26272329 | 26272388 | CSAR_peak_ | 7.27             | - |
| chr5 | 26272772 | 26272825 | CSAR_peak_ | 7.58,6.85        | - |
| chr5 | 26302840 | 26302880 | CSAR_peak_ | 6.21             | - |
| chr5 | 26346603 | 26346661 | CSAR_peak_ | 8.39             | - |

|      |          |          |            |                |
|------|----------|----------|------------|----------------|
| chr5 | 26348793 | 26348835 | CSAR_peak_ | 8.47,9.57,8,2- |
| chr5 | 26348861 | 26348900 | CSAR_peak_ | 8.89,8.16,7.9- |
| chr5 | 26349733 | 26349826 | CSAR_peak_ | 29.02,24.99,-  |
| chr5 | 26361967 | 26362167 | CSAR_peak_ | 37.55,21.94,-  |
| chr5 | 26362509 | 26362656 | CSAR_peak_ | 13.92,16.55 -  |
| chr5 | 26362813 | 26362916 | CSAR_peak_ | 27.64,14.88 -  |
| chr5 | 26363015 | 26363073 | CSAR_peak_ | 8.39,6.21 -    |
| chr5 | 26363176 | 26363217 | CSAR_peak_ | 10.83 -        |
| chr5 | 26365531 | 26365581 | CSAR_peak_ | 6.21 -         |
| chr5 | 26370357 | 26370391 | CSAR_peak_ | 7.27 -         |
| chr5 | 26372491 | 26372572 | CSAR_peak_ | 8.39,7.27 -    |
| chr5 | 26373008 | 26373064 | CSAR_peak_ | 9.58 -         |
| chr5 | 26373233 | 26373287 | CSAR_peak_ | 8.65 -         |
| chr5 | 26374162 | 26374222 | CSAR_peak_ | 9.58 -         |
| chr5 | 26374251 | 26374335 | CSAR_peak_ | 9.58,7.27 -    |
| chr5 | 26374859 | 26374915 | CSAR_peak_ | 9.58,7.27 -    |
| chr5 | 26376782 | 26376807 | CSAR_peak_ | 6.21 -         |
| chr5 | 26376933 | 26376982 | CSAR_peak_ | 7.78 -         |
| chr5 | 26377038 | 26377067 | CSAR_peak_ | 10.33 -        |
| chr5 | 26378300 | 26378331 | CSAR_peak_ | 24.21 -        |
| chr5 | 26378410 | 26378462 | CSAR_peak_ | 17.37 -        |
| chr5 | 26378596 | 26378662 | CSAR_peak_ | 10.02 -        |
| chr5 | 26378843 | 26378961 | CSAR_peak_ | 8.14,7.27,8.3- |
| chr5 | 26378989 | 26379057 | CSAR_peak_ | 13.48 -        |
| chr5 | 26379132 | 26379202 | CSAR_peak_ | 20.94 -        |
| chr5 | 26387808 | 26387914 | CSAR_peak_ | 25.91,12.13 -  |
| chr5 | 26388167 | 26388235 | CSAR_peak_ | 9.58,10.83 -   |
| chr5 | 26388594 | 26388650 | CSAR_peak_ | 12.13 -        |
| chr5 | 26388994 | 26389034 | CSAR_peak_ | 7.27 -         |
| chr5 | 26403235 | 26403284 | CSAR_peak_ | 6.21 -         |
| chr5 | 26405076 | 26405130 | CSAR_peak_ | 12.13 -        |
| chr5 | 26405185 | 26405225 | CSAR_peak_ | 7.27 -         |
| chr5 | 26405580 | 26405822 | CSAR_peak_ | 25.34,12.59,-  |
| chr5 | 26405916 | 26405975 | CSAR_peak_ | 45.5,10.83,9.- |
| chr5 | 26406087 | 26406136 | CSAR_peak_ | 34.26,8.65 -   |
| chr5 | 26406252 | 26406347 | CSAR_peak_ | 9.58,19.36 -   |
| chr5 | 26406360 | 26406388 | CSAR_peak_ | 6.85,6.8 -     |
| chr5 | 26406442 | 26406543 | CSAR_peak_ | 9.27,10.99,2,- |
| chr5 | 26406617 | 26406687 | CSAR_peak_ | 15.28,16.34 -  |
| chr5 | 26406721 | 26406762 | CSAR_peak_ | 9.58,9.79 -    |
| chr5 | 26406933 | 26407034 | CSAR_peak_ | 9.79,10.52,1,- |
| chr5 | 26407121 | 26407185 | CSAR_peak_ | 7.58,12.17 -   |

|      |          |          |            |                 |   |
|------|----------|----------|------------|-----------------|---|
| chr5 | 26407192 | 26407222 | CSAR_peak_ | 7.92            | - |
| chr5 | 26407225 | 26407250 | CSAR_peak_ | 6.21,12.5       | - |
| chr5 | 26407442 | 26407522 | CSAR_peak_ | 8.65,30.21      | - |
| chr5 | 26407591 | 26407676 | CSAR_peak_ | 14.76,20.94     | - |
| chr5 | 26408020 | 26408143 | CSAR_peak_ | 20.94,6.21,1.1  | - |
| chr5 | 26408303 | 26408344 | CSAR_peak_ | 6.57            | - |
| chr5 | 26408481 | 26408568 | CSAR_peak_ | 12.17           | - |
| chr5 | 26408726 | 26408846 | CSAR_peak_ | 9.84,14.88,1.1  | - |
| chr5 | 26408931 | 26408965 | CSAR_peak_ | 8.13,10.83      | - |
| chr5 | 26408977 | 26409101 | CSAR_peak_ | 18.73,10.31     | - |
| chr5 | 26409278 | 26409325 | CSAR_peak_ | 7.92,31.73      | - |
| chr5 | 26409340 | 26409402 | CSAR_peak_ | 35.83,8.12      | - |
| chr5 | 26409483 | 26409491 | CSAR_peak_ | 13.51           | - |
| chr5 | 26409538 | 26409610 | CSAR_peak_ | 6.21            | - |
| chr5 | 26409633 | 26409720 | CSAR_peak_ | 12.13           | - |
| chr5 | 26409770 | 26409878 | CSAR_peak_ | 12.13,9.58      | - |
| chr5 | 26410592 | 26410667 | CSAR_peak_ | 9.58            | - |
| chr5 | 26411175 | 26411225 | CSAR_peak_ | 6.21            | - |
| chr5 | 26411823 | 26411875 | CSAR_peak_ | 20.94           | - |
| chr5 | 26412016 | 26412084 | CSAR_peak_ | 8.2,8.39,6.21   | - |
| chr5 | 26412111 | 26412229 | CSAR_peak_ | 23.42,25.62     | - |
| chr5 | 26412314 | 26412514 | CSAR_peak_ | 25.91,24.21,1.1 | - |
| chr5 | 26412554 | 26412652 | CSAR_peak_ | 7.71,10.44      | - |
| chr5 | 26412785 | 26412867 | CSAR_peak_ | 13.48           | - |
| chr5 | 26413023 | 26413064 | CSAR_peak_ | 8.39            | - |
| chr5 | 26413070 | 26413119 | CSAR_peak_ | 10.83           | - |
| chr5 | 26413181 | 26413316 | CSAR_peak_ | 13.48,14.88,1.1 | - |
| chr5 | 26413330 | 26413422 | CSAR_peak_ | 25.91,10.95     | - |
| chr5 | 26413492 | 26413556 | CSAR_peak_ | 19.68,32.86     | - |
| chr5 | 26413626 | 26413762 | CSAR_peak_ | 14.85,7.53,1.1  | - |
| chr5 | 26413768 | 26413847 | CSAR_peak_ | 22.56,9.77      | - |
| chr5 | 26414049 | 26414108 | CSAR_peak_ | 20.43           | - |
| chr5 | 26414252 | 26414308 | CSAR_peak_ | 12.13           | - |
| chr5 | 26414384 | 26414447 | CSAR_peak_ | 7.27            | - |
| chr5 | 26417335 | 26417403 | CSAR_peak_ | 9.58,7.27       | - |
| chr5 | 26417421 | 26417486 | CSAR_peak_ | 7.58,7.27,6.9   | - |
| chr5 | 26417525 | 26417535 | CSAR_peak_ | 7.73            | - |
| chr5 | 26417636 | 26417675 | CSAR_peak_ | 8.39            | - |
| chr5 | 26417699 | 26417778 | CSAR_peak_ | 20.13,10.83     | - |
| chr5 | 26417814 | 26417845 | CSAR_peak_ | 10.83           | - |
| chr5 | 26418400 | 26418461 | CSAR_peak_ | 6.21            | - |
| chr5 | 26418859 | 26418915 | CSAR_peak_ | 10.83           | - |



|      |          |          |            |                |   |
|------|----------|----------|------------|----------------|---|
| chr5 | 26418928 | 26419020 | CSAR_peak_ | 13.51,10.83    | - |
| chr5 | 26431835 | 26431894 | CSAR_peak_ | 8.39           | - |
| chr5 | 26432346 | 26432551 | CSAR_peak_ | 14.88,10.83    | - |
| chr5 | 26432937 | 26432991 | CSAR_peak_ | 9.27           | - |
| chr5 | 26449343 | 26449459 | CSAR_peak_ | 14.88,10.83    | - |
| chr5 | 26450278 | 26450342 | CSAR_peak_ | 7.27           | - |
| chr5 | 26450648 | 26450697 | CSAR_peak_ | 16.33          | - |
| chr5 | 26451429 | 26451444 | CSAR_peak_ | 9.58           | - |
| chr5 | 26451486 | 26451507 | CSAR_peak_ | 7.18           | - |
| chr5 | 26451576 | 26451645 | CSAR_peak_ | 5.86,17.82,8.- | - |
| chr5 | 26451684 | 26451739 | CSAR_peak_ | 13.48,8.65     | - |
| chr5 | 26451805 | 26451910 | CSAR_peak_ | 10.02,14.76    | - |
| chr5 | 26452032 | 26452149 | CSAR_peak_ | 9.58,11.63,6.- | - |
| chr5 | 26452350 | 26452444 | CSAR_peak_ | 16.33,8.65     | - |
| chr5 | 26452473 | 26452540 | CSAR_peak_ | 12.59,6.21,5.- | - |
| chr5 | 26452590 | 26452801 | CSAR_peak_ | 14.76,6.21,2(- | - |
| chr5 | 26452908 | 26452931 | CSAR_peak_ | 14.88          | - |
| chr5 | 26453378 | 26453464 | CSAR_peak_ | 12.35,17.82    | - |
| chr5 | 26453581 | 26453631 | CSAR_peak_ | 13.48          | - |
| chr5 | 26453654 | 26453772 | CSAR_peak_ | 14.88          | - |
| chr5 | 26453791 | 26453809 | CSAR_peak_ | 6.95           | - |
| chr5 | 26453842 | 26453900 | CSAR_peak_ | 8.39,5.79      | - |
| chr5 | 26454029 | 26454089 | CSAR_peak_ | 6.03           | - |
| chr5 | 26454343 | 26454454 | CSAR_peak_ | 22.56,20.94    | - |
| chr5 | 26454489 | 26454566 | CSAR_peak_ | 7.27,7.27      | - |
| chr5 | 26454930 | 26455021 | CSAR_peak_ | 10.83,5.62,8.- | - |
| chr5 | 26455050 | 26455149 | CSAR_peak_ | 14.88          | - |
| chr5 | 26455981 | 26456044 | CSAR_peak_ | 7.58,8.39      | - |
| chr5 | 26456080 | 26456160 | CSAR_peak_ | 11.14          | - |
| chr5 | 26456346 | 26456407 | CSAR_peak_ | 10.18,9.03     | - |
| chr5 | 26456409 | 26457277 | CSAR_peak_ | 23.65,33.03,(  | - |
| chr5 | 26457373 | 26457433 | CSAR_peak_ | 13.72,11.71    | - |
| chr5 | 26457447 | 26457481 | CSAR_peak_ | 15.96          | - |
| chr5 | 26457482 | 26457681 | CSAR_peak_ | 12.59,12.13,(- | - |
| chr5 | 26457766 | 26457893 | CSAR_peak_ | 30.02,20.21    | - |
| chr5 | 26457986 | 26458040 | CSAR_peak_ | 13.48,6.64     | - |
| chr5 | 26458064 | 26458229 | CSAR_peak_ | 24.21,7.27,1(- | - |
| chr5 | 26458248 | 26458327 | CSAR_peak_ | 19.98,35.85    | - |
| chr5 | 26458416 | 26458539 | CSAR_peak_ | 25.62,19.67,(  | - |
| chr5 | 26458629 | 26458883 | CSAR_peak_ | 18.6,11.03,5.- | - |
| chr5 | 26459144 | 26459211 | CSAR_peak_ | 30.49,25.08    | - |
| chr5 | 26476720 | 26476778 | CSAR_peak_ | 7.27           | - |

|      |          |          |            |                |   |
|------|----------|----------|------------|----------------|---|
| chr5 | 26477595 | 26477651 | CSAR_peak_ | 14.88,7.27     | - |
| chr5 | 26478089 | 26478117 | CSAR_peak_ | 7.27           | - |
| chr5 | 26479417 | 26479463 | CSAR_peak_ | 7.27           | - |
| chr5 | 26490248 | 26490293 | CSAR_peak_ | 7.27           | - |
| chr5 | 26522122 | 26522187 | CSAR_peak_ | 7.27           | - |
| chr5 | 26522943 | 26523011 | CSAR_peak_ | 12.13          | - |
| chr5 | 26538787 | 26538829 | CSAR_peak_ | 9.58           | - |
| chr5 | 26538983 | 26539030 | CSAR_peak_ | 9.58           | - |
| chr5 | 26539264 | 26539313 | CSAR_peak_ | 7.27           | - |
| chr5 | 26541609 | 26541645 | CSAR_peak_ | 7.92           | - |
| chr5 | 26541946 | 26541999 | CSAR_peak_ | 8.39           | - |
| chr5 | 26542172 | 26542203 | CSAR_peak_ | 7.27           | - |
| chr5 | 26542217 | 26542249 | CSAR_peak_ | 6.85,7.34      | - |
| chr5 | 26542489 | 26542504 | CSAR_peak_ | 7.92           | - |
| chr5 | 26542993 | 26543040 | CSAR_peak_ | 9.58           | - |
| chr5 | 26543219 | 26543275 | CSAR_peak_ | 6.21           | - |
| chr5 | 26543421 | 26543542 | CSAR_peak_ | 13.48,19.36    | - |
| chr5 | 26543678 | 26543727 | CSAR_peak_ | 7.27           | - |
| chr5 | 26543928 | 26543988 | CSAR_peak_ | 14.88          | - |
| chr5 | 26544032 | 26544082 | CSAR_peak_ | 6.21           | - |
| chr5 | 26544992 | 26545047 | CSAR_peak_ | 12.31,24.21    | - |
| chr5 | 26547022 | 26547065 | CSAR_peak_ | 9.58           | - |
| chr5 | 26547711 | 26547761 | CSAR_peak_ | 7.27           | - |
| chr5 | 26551439 | 26551489 | CSAR_peak_ | 6.21           | - |
| chr5 | 26553840 | 26553887 | CSAR_peak_ | 12.13,6.81     | - |
| chr5 | 26553976 | 26554005 | CSAR_peak_ | 5.86           | - |
| chr5 | 26554011 | 26554058 | CSAR_peak_ | 9.58           | - |
| chr5 | 26555586 | 26555623 | CSAR_peak_ | 6.21           | - |
| chr5 | 26560810 | 26560871 | CSAR_peak_ | 9.58,6.21      | - |
| chr5 | 26560957 | 26561009 | CSAR_peak_ | 16.11          | - |
| chr5 | 26602716 | 26602774 | CSAR_peak_ | 16.33          | - |
| chr5 | 26603283 | 26603327 | CSAR_peak_ | 14.88          | - |
| chr5 | 26603441 | 26603479 | CSAR_peak_ | 12.17          | - |
| chr5 | 26603543 | 26603662 | CSAR_peak_ | 9.58,18.35,4.1 | - |
| chr5 | 26603691 | 26603962 | CSAR_peak_ | 62.11,66.35,1  | - |
| chr5 | 26603988 | 26604054 | CSAR_peak_ | 7.29,7.58      | - |
| chr5 | 26618447 | 26618509 | CSAR_peak_ | 12.13          | - |
| chr5 | 26619063 | 26619087 | CSAR_peak_ | 7.27           | - |
| chr5 | 26641865 | 26641937 | CSAR_peak_ | 6.21,9.58      | - |
| chr5 | 26642000 | 26642043 | CSAR_peak_ | 9.58           | - |
| chr5 | 26643034 | 26643115 | CSAR_peak_ | 8.52,19.98     | - |
| chr5 | 26643117 | 26643220 | CSAR_peak_ | 8.95,24.21     | - |

|      |          |          |            |                |   |
|------|----------|----------|------------|----------------|---|
| chr5 | 26643272 | 26643420 | CSAR_peak_ | 16.33,34.04    | - |
| chr5 | 26643754 | 26643805 | CSAR_peak_ | 13.48,36.78    | - |
| chr5 | 26643941 | 26644036 | CSAR_peak_ | 6.21,9.41,14.  | - |
| chr5 | 26714991 | 26715096 | CSAR_peak_ | 6.87           | - |
| chr5 | 26716217 | 26716323 | CSAR_peak_ | 9.77,12.13     | - |
| chr5 | 26716434 | 26716479 | CSAR_peak_ | 19.36          | - |
| chr5 | 26716632 | 26716683 | CSAR_peak_ | 7.27           | - |
| chr5 | 26717127 | 26717165 | CSAR_peak_ | 7.58           | - |
| chr5 | 26717226 | 26717285 | CSAR_peak_ | 10.31,12.13    | - |
| chr5 | 26717308 | 26717396 | CSAR_peak_ | 9.58           | - |
| chr5 | 26717504 | 26717572 | CSAR_peak_ | 17.82,14.88    | - |
| chr5 | 26753760 | 26753817 | CSAR_peak_ | 8.84           | - |
| chr5 | 26753836 | 26753856 | CSAR_peak_ | 7.58           | - |
| chr5 | 26753968 | 26754000 | CSAR_peak_ | 8.13           | - |
| chr5 | 26754084 | 26754186 | CSAR_peak_ | 9.72,18.1,5.8- | - |
| chr5 | 26754306 | 26754347 | CSAR_peak_ | 14.88          | - |
| chr5 | 26754446 | 26754538 | CSAR_peak_ | 21.94,17.68,-  | - |
| chr5 | 26754652 | 26754717 | CSAR_peak_ | 18.73,9.77     | - |
| chr5 | 26754947 | 26755011 | CSAR_peak_ | 9.58           | - |
| chr5 | 26755124 | 26755239 | CSAR_peak_ | 13.44,15       | - |
| chr5 | 26755311 | 26755319 | CSAR_peak_ | 7.27           | - |
| chr5 | 26755341 | 26755403 | CSAR_peak_ | 12.13,17.37    | - |
| chr5 | 26755487 | 26755497 | CSAR_peak_ | 7.27           | - |
| chr5 | 26755576 | 26755635 | CSAR_peak_ | 11.07          | - |
| chr5 | 26755782 | 26755900 | CSAR_peak_ | 13.51,19.36,-  | - |
| chr5 | 26755989 | 26756082 | CSAR_peak_ | 14.88,29.4     | - |
| chr5 | 26756183 | 26756393 | CSAR_peak_ | 40.66,5.86,2-  | - |
| chr5 | 26756397 | 26756452 | CSAR_peak_ | 20.05,6.94     | - |
| chr5 | 26756475 | 26756500 | CSAR_peak_ | 6.21           | - |
| chr5 | 26756578 | 26756692 | CSAR_peak_ | 13.48,25.91    | - |
| chr5 | 26756752 | 26756929 | CSAR_peak_ | 17.68,11.14,-  | - |
| chr5 | 26825481 | 26825519 | CSAR_peak_ | 7.27           | - |
| chr5 | 26826102 | 26826153 | CSAR_peak_ | 10.83          | - |
| chr5 | 26827116 | 26827129 | CSAR_peak_ | 7.27,7.27      | - |
| chr5 | 26827216 | 26827273 | CSAR_peak_ | 10.02,24.21    | - |
| chr5 | 26827607 | 26827656 | CSAR_peak_ | 7.27           | - |
| chr5 | 26831778 | 26832183 | CSAR_peak_ | 12.23,9.55,8.- | - |
| chr5 | 26833117 | 26833169 | CSAR_peak_ | 8.13           | - |
| chr5 | 26833178 | 26833309 | CSAR_peak_ | 25.1,20.54     | - |
| chr5 | 26881310 | 26881361 | CSAR_peak_ | 6.57           | - |
| chr5 | 26881684 | 26881727 | CSAR_peak_ | 8.39,10.83     | - |
| chr5 | 26905035 | 26905113 | CSAR_peak_ | 10.83          | - |

|      |          |          |            |                   |   |
|------|----------|----------|------------|-------------------|---|
| chr5 | 26913057 | 26913100 | CSAR_peak_ | 6.21              | - |
| chr5 | 26913123 | 26913224 | CSAR_peak_ | 8.39              | - |
| chr5 | 26914117 | 26914174 | CSAR_peak_ | 6.21,7.27         | - |
| chr5 | 26914737 | 26914779 | CSAR_peak_ | 7.27              | - |
| chr5 | 26930682 | 26930749 | CSAR_peak_ | 8.39              | - |
| chr5 | 26930821 | 26930874 | CSAR_peak_ | 9.58              | - |
| chr5 | 26931170 | 26931211 | CSAR_peak_ | 12.13             | - |
| chr5 | 26931362 | 26931485 | CSAR_peak_ | 20.54,25.91       | - |
| chr5 | 26931491 | 26931527 | CSAR_peak_ | 24.21,6.21        | - |
| chr5 | 26931559 | 26931891 | CSAR_peak_ | 7.92,35.83,21.11  | - |
| chr5 | 26932050 | 26932222 | CSAR_peak_ | 26.69,16.33,12.13 | - |
| chr5 | 26932268 | 26932410 | CSAR_peak_ | 19.36,12.94       | - |
| chr5 | 26932515 | 26932655 | CSAR_peak_ | 20.94,9.58,3.03   | - |
| chr5 | 26932660 | 26932723 | CSAR_peak_ | 6.21              | - |
| chr5 | 26932770 | 26932872 | CSAR_peak_ | 16.11,25.91       | - |
| chr5 | 26942753 | 26942815 | CSAR_peak_ | 6.03              | - |
| chr5 | 26945737 | 26945783 | CSAR_peak_ | 7.27              | - |
| chr5 | 26946016 | 26946085 | CSAR_peak_ | 16.11             | - |
| chr5 | 26956812 | 26956860 | CSAR_peak_ | 12.13             | - |
| chr5 | 26962327 | 26962385 | CSAR_peak_ | 9.77              | - |
| chr5 | 26962648 | 26962714 | CSAR_peak_ | 5.86              | - |
| chr5 | 26962853 | 26962890 | CSAR_peak_ | 6.21              | - |
