# Supplementary material
Source: PubMed Central journal article supplement (PMC4871124)
Supplement: NIHMS786263-supplement-S3.pdf [file NIHMS786263-supplement-S3.pdf]

| <u>Motif Name</u> | <u>Bound Sites</u> | <u>p-value</u> |
|-------------------|--------------------|----------------|
| MEME Motif        | 90132              | 1.1E-50**      |
| HOMER motif 1     | 1041103            | 1.00E-167      |
| HOMER motif 2     | 301212             | 1.00E-108      |
| HOMER motif 3     | 284653             | 1.00E-84       |
| HOMER motif 4     | 195089             | 1.00E-81       |
| HOMER motif 5     | 2035               | 1.00E-67       |
| HOMER motif 6     | 34077              | 1.00E-67       |

|               |      |          |
|---------------|------|----------|
| HOMER motif 7 | 1375 | 1.00E-62 |
|---------------|------|----------|

|               |       |          |
|---------------|-------|----------|
| HOMER motif 8 | 25969 | 1.00E-52 |
|---------------|-------|----------|

|               |      |          |
|---------------|------|----------|
| HOMER motif 9 | 3079 | 1.00E-52 |
|---------------|------|----------|

|                |        |          |
|----------------|--------|----------|
| HOMER motif 10 | 296569 | 1.00E-50 |
|----------------|--------|----------|

|                |     |          |
|----------------|-----|----------|
| HOMER motif 11 | 607 | 1.00E-47 |
|----------------|-----|----------|

|                |      |          |
|----------------|------|----------|
| HOMER motif 12 | 2120 | 1.00E-47 |
|----------------|------|----------|

|                |       |          |
|----------------|-------|----------|
| HOMER motif 13 | 40997 | 1.00E-42 |
|----------------|-------|----------|

|                |      |          |
|----------------|------|----------|
| HOMER motif 14 | 1571 | 1.00E-42 |
|----------------|------|----------|

|                |       |          |
|----------------|-------|----------|
| HOMER motif 15 | 1918  | 1.00E-41 |
| HOMER motif 16 | 1766  | 1.00E-37 |
| HOMER motif 17 | 10359 | 1.00E-36 |
| HOMER motif 18 | 11    | 1.00E-35 |
| HOMER motif 19 | 2048  | 1.00E-35 |
| HOMER motif 20 | 807   | 1.00E-34 |
| HOMER motif 21 | 44    | 1.00E-33 |
| HOMER motif 22 | 12523 | 1.00E-33 |

|                |      |          |
|----------------|------|----------|
| HOMER motif 23 | 1622 | 1.00E-30 |
| HOMER motif 24 | 1076 | 1.00E-29 |
| HOMER motif 25 | 2818 | 1.00E-29 |
| HOMER motif 26 | 1174 | 1.00E-28 |
| HOMER motif 27 | 3668 | 1.00E-26 |
| HOMER motif 28 | 4994 | 1.00E-25 |
| HOMER motif 29 | 2020 | 1.00E-23 |
| HOMER motif 30 | 21   | 1.00E-21 |

|                |       |          |
|----------------|-------|----------|
| HOMER motif 31 | 7503  | 1.00E-20 |
| HOMER motif 32 | 15921 | 1.00E-20 |
| HOMER motif 33 | 1064  | 1.00E-19 |
| HOMER motif 34 | 1117  | 1.00E-18 |
| HOMER motif 35 | 1261  | 1.00E-16 |
| HOMER motif 36 | 871   | 1.00E-16 |
| HOMER motif 37 | 1106  | 1.00E-14 |
| HOMER motif 38 | 35    | 1.00E-12 |

|                |     |          |
|----------------|-----|----------|
| HOMER motif 39 | 490 | 1.00E-11 |
|----------------|-----|----------|

|                |      |          |
|----------------|------|----------|
| HOMER motif 40 | 1090 | 1.00E-07 |
|----------------|------|----------|

Logo

G A A A A A G A A G A A G A A G A A G A  
A G G G G C A G C A G C A G C A G C A G C A

U C U A G A A C  
C U G A G A U  
A A C G G A U

C U G U A G A U  
A U A G A U

C U U G G C A C  
A U A G A U

G A U A U U G G A C  
A U A G A U

U A A A G G U G G A A A  
A G G U A G A U

U A U G C A G G  
A U A G A U

UUAGAGAAUCUG

GAUCCSGAGA

UAGUGCUAGG

UUGAUUGAACUUG

CGAGAGGGAGUAC

AAGGAACUUAUG

CACCCGAG

UAGAUUUGGAUG



GGAAUUUGAGAA

UCUGAGAUCA

ACUGGGAUUC

AACGACAACGAG

UAGGACCUUGG

AGCGUGCUUUGG

UGGAAGUAGUAA

ACCCGGAUGU

GAAAUGAAUCUG

GCUACAGAAGGA

UGAUGAGAAA

UGCUGGAGACAA

UUACACGG

GGGCGAGA

AUGUGAAGGUUG

GAUUGAAAGAGC

CGGACAAG

CUAAGAAG

GUAUCGUG

UUGAAUUGGCUA

GAACUACG

GGCUCGUA

GCAGUCGG

GACAUGGAACAA

GCGGC GGG

UGG CUACG  
ACU

**Cluster**

Cluster 2      \*\*E-value  
as reported  
by MEME

Cluster 1

Cluster 1

Cluster 1

Cluster 1

Cluster 3

Cluster 2

Cluster 3

Cluster 2

Cluster 3

Cluster 1

Cluster 3

Cluster 3

Cluster 2

Cluster 3



Cluster 3

Cluster 3

Cluster 3

Cluster 3

Cluster 3

Cluster 3

Cluster 3

Cluster 3

Cluster 3

Cluster 3
