# Supplementary material
Source: PubMed Central journal article supplement (PMC4871124)
Supplement: NIHMS786263-supplement-S4.pdf [file NIHMS786263-supplement-S4.pdf]

## Synthetic RNA oligonucleotide and qPCR primer sequences

### Probe Name

GAN Scramble Probe  
GAN Repeat Probe  
HOMER Scramble  
HOMER motif 2 probe  
HOMER motif 3 probe  
HOMER motif 4 probe  
HOMER motif 5 probe

### Sequence

GGGANNAAGNANGGGNANAA  
GANGANGANGANGANGANGA  
UNNNNNNNNUUUNNNNNNNNU  
UCUGUAGAUUUUCUGUAGAUU  
UNUUGGHACUUUNUUGGHACU  
UGAUUUUGGANUUUGAUUUUGGANU  
UUAAAGGUGGAAAUUUAAAGGUGGAAAU

### qPCR Primer

At3g18780/ACTIN2 F  
At3g18780/ACTIN2 R  
AT1G70290/ATPS8 F  
AT1G70290/ATPS8 R  
AT1G29690/CAD1 F  
AT1G29690/CAD1 R  
AT2G26300/GPA1 F  
AT2G26300/GPA1 R  
ATCG00680/psbB F  
ATCG00680/psbB R  
ATCG00490/RPCL F  
ATCG00490/RPCL R

### Sequence

GCACCCTGTTCTTCTTACCG  
AACCCTCGTAGATTGGCACA  
AGCAGCTGAACATGGATACTT  
CTCCCACTCATCTTTGCTCTT  
GGTTTCTCCACTTGTTCTTCT  
CACCAATGGTCACCGAAGTTA  
CGGATAGAGTGGACAGGGTATT  
GCCTCCAGTAAATTTCTCCTTCTT  
GGGTATATTAGCGGGCCTATTC  
CTACTGGAAAGGACGGTTTCA  
CCAGAGAATTGGGAGTTCCTATC  
GTAGGCCATTATCTCGGCAATA
