# Supplementary material
Source: PubMed Central journal article supplement (PMC4871124)
Supplement: NIHMS786263-supplement-S5.pdf [file NIHMS786263-supplement-S5.pdf]

| Accession   | Description                                                    | $\Sigma$ Coverage | $\Sigma$ # Unique Peptides | $\Sigma$ # PSMs |
|-------------|----------------------------------------------------------------|-------------------|----------------------------|-----------------|
| ATCG00490.1 | ribulose-bisphosphate carboxylases                             | 56.99             | 30                         | 1261            |
| AT2G40840.1 | disproportionating enzyme 2                                    | 35.71             | 24                         | 327             |
| AT2G39730.1 | rubisco activase                                               | 52.32             | 18                         | 580             |
| ATCG00480.1 | ATP synthase subunit beta                                      | 55.42             | 17                         | 584             |
| AT1G42970.1 | glyceraldehyde-3-phosphate dehydrogenase B subunit             | 50.11             | 13                         | 276             |
| ATCG00120.1 | ATP synthase subunit alpha                                     | 42.80             | 13                         | 396             |
| AT3G60750.2 | Transketolase                                                  | 28.11             | 12                         | 155             |
| AT1G20620.1 | catalase 3                                                     | 47.97             | 11                         | 574             |
| AT2G36530.1 | Enolase                                                        | 42.79             | 10                         | 63              |
| AT2G13360.1 | alanine:glyoxylate aminotransferase                            | 33.17             | 9                          | 109             |
| AT3G12780.1 | phosphoglycerate kinase 1                                      | 49.69             | 8                          | 150             |
| AT3G45140.1 | lipoygenase 2                                                  | 22.88             | 8                          | 47              |
| AT5G35630.1 | glutamine synthetase 2                                         | 29.53             | 8                          | 143             |
| AT4G35090.1 | catalase 2                                                     | 41.26             | 8                          | 420             |
| AT4G33010.1 | glycine decarboxylase P-protein 1                              | 24.78             | 7                          | 111             |
| AT1G67090.1 | ribulose bisphosphate carboxylase small chain 1A               | 54.44             | 7                          | 518             |
| AT4G37930.1 | serine transhydroxymethyltransferase 1                         | 22.63             | 7                          | 21              |
| AT5G04140.1 | glutamate synthase 1                                           | 12.33             | 7                          | 21              |
| AT1G23310.1 | glutamate:glyoxylate aminotransferase                          | 27.23             | 6                          | 51              |
| AT1G56070.1 | Ribosomal protein S5/Elongation factor G/III/V family protein  | 11.86             | 6                          | 17              |
| AT1G13440.1 | glyceraldehyde-3-phosphate dehydrogenase C2                    | 53.25             | 6                          | 113             |
| AT3G55800.1 | sedoheptulose-bisphosphatase                                   | 32.82             | 6                          | 107             |
| AT2G21660.1 | cold, circadian rhythm, and rna binding 2                      | 55.11             | 6                          | 78              |
| AT1G07920.1 | GTP binding Elongation factor Tu family protein                | 21.83             | 6                          | 123             |
| AT4G04640.1 | ATPase, F1 complex, gamma subunit protein                      | 32.17             | 6                          | 102             |
| AT5G08670.1 | ATP synthase alpha/beta family protein                         | 26.62             | 6                          | 83              |
| AT3G46970.1 | alpha-glucan phosphorylase 2                                   | 14.15             | 6                          | 23              |
| AT4G20360.1 | RAB GTPase homolog E1B                                         | 27.73             | 6                          | 88              |
| AT3G14310.1 | pectin methylesterase 3                                        | 14.53             | 6                          | 75              |
| AT3G04790.1 | Ribose 5-phosphate isomerase, type A protein                   | 41.30             | 5                          | 83              |
| AT2G37220.1 | RNA-binding (RRM/RBD/RNP motifs) family protein                | 29.76             | 5                          | 96              |
| AT5G38410.1 | Ribulose bisphosphate carboxylase (small chain) family protein | 54.70             | 5                          | 368             |
| AT4G21280.1 | photosystem II subunit QA                                      | 43.05             | 5                          | 79              |
| AT3G26650.1 | glyceraldehyde 3-phosphate dehydrogenase A subunit             | 48.48             | 5                          | 386             |
| AT1G06680.2 | photosystem II subunit P-1                                     | 45.66             | 5                          | 84              |
| AT4G38970.1 | fructose-bisphosphate aldolase 2                               | 42.46             | 5                          | 260             |
| AT5G17920.1 | Cobalamin-independent synthase family protein                  | 12.03             | 5                          | 16              |
| AT5G25980.1 | glucoside glucohydrolase 2                                     | 33.83             | 5                          | 76              |
| AT1G09340.1 | chloroplast RNA binding                                        | 18.52             | 4                          | 25              |
| AT3G20820.1 | Leucine-rich repeat (LRR) family protein                       | 27.67             | 4                          | 30              |
| AT5G38430.1 | Ribulose bisphosphate carboxylase (small chain) family protein | 44.75             | 4                          | 286             |
| AT4G05180.1 | photosystem II subunit Q-2                                     | 36.96             | 4                          | 82              |
| ATCG00680.1 | photosystem II reaction center protein B                       | 14.17             | 4                          | 13              |
| AT1G11860.1 | Glycine cleavage T-protein family                              | 22.30             | 4                          | 25              |
| AT2G21330.3 | fructose-bisphosphate aldolase 1                               | 30.85             | 4                          | 200             |
| AT5G26000.2 | thioglucoside glucohydrolase 1                                 | 17.98             | 4                          | 55              |
| AT5G02500.2 | heat shock cognate protein 70-1                                | 17.66             | 4                          | 28              |
| AT4G09010.1 | ascorbate peroxidase 4                                         | 21.78             | 4                          | 21              |
| AT3G44310.1 | nitrilase 1                                                    | 15.61             | 4                          | 24              |
| AT3G46780.1 | plastid transcriptionally active 16                            | 11.57             | 4                          | 14              |
| AT5G20950.1 | Glycosyl hydrolase family protein                              | 10.74             | 3                          | 9               |
| AT3G13470.1 | TCP-1/cpn60 chaperonin family protein                          | 6.38              | 3                          | 8               |
| AT2G28000.1 | chaperonin-60alpha                                             | 12.29             | 3                          | 9               |

|             |                                                                 |       |   |     |
|-------------|-----------------------------------------------------------------|-------|---|-----|
| AT1G32060.1 | phosphoribulokinase                                             | 24.81 | 3 | 15  |
| AT1G20630.1 | catalase 1                                                      | 27.24 | 3 | 123 |
| AT5G14740.2 | carbonic anhydrase 2                                            | 36.29 | 3 | 197 |
| ATCG00130.1 | ATPase, F0 complex, subunit B/B', bacterial/chloroplast         | 25.00 | 3 | 15  |
| AT5G09810.1 | actin 7                                                         | 11.94 | 3 | 17  |
| AT1G12900.3 | glyceraldehyde 3-phosphate dehydrogenase A subunit 2            | 45.43 | 3 | 296 |
| AT3G14420.4 | Aldolase-type TIM barrel family protein                         | 52.30 | 3 | 117 |
| AT4G13940.4 | S-adenosyl-L-homocysteine hydrolase                             | 31.38 | 3 | 24  |
| AT4G03280.2 | photosynthetic electron transfer C                              | 21.43 | 3 | 39  |
| AT2G06850.1 | xyloglucan endotransglucosylase/hydrolase 4                     | 17.23 | 3 | 15  |
| AT1G04410.1 | Lactate/malate dehydrogenase family protein                     | 19.58 | 3 | 28  |
| AT3G53460.1 | chloroplast RNA-binding protein 29                              | 18.13 | 3 | 31  |
| AT5G20010.1 | RAS-related nuclear protein-1                                   | 15.84 | 3 | 20  |
| AT4G39260.1 | cold, circadian rhythm, and RNA binding 1                       | 34.32 | 3 | 33  |
| AT2G25080.1 | glutathione peroxidase 1                                        | 29.24 | 3 | 12  |
| AT4G14960.1 | Tubulin/FtsZ family protein                                     | 10.54 | 3 | 16  |
| AT5G26570.2 | catalytics;carbohydrate kinases;phosphoglucan, water dikinases  | 6.24  | 3 | 12  |
| AT4G09650.1 | ATP synthase delta-subunit gene                                 | 17.09 | 3 | 24  |
| AT1G10630.1 | ADP-ribosylation factor A1F                                     | 38.67 | 3 | 21  |
| AT4G20260.5 | plasma-membrane associated cation-binding protein 1             | 32.34 | 3 | 15  |
| AT3G09820.2 | adenosine kinase 1                                              | 16.89 | 3 | 4   |
| AT2G32080.2 | purin-rich alpha 1                                              | 18.64 | 3 | 8   |
| AT1G78900.1 | vacuolar ATP synthase subunit A                                 | 8.99  | 3 | 4   |
| AT5G15200.2 | Ribosomal protein S4                                            | 17.95 | 3 | 12  |
| AT1G07890.6 | ascorbate peroxidase 1                                          | 20.88 | 3 | 3   |
| AT4G26530.1 | Aldolase superfamily protein                                    | 12.29 | 2 | 35  |
| AT2G20890.1 | photosystem II reaction center PSB29 protein                    | 8.00  | 2 | 14  |
| AT4G32260.1 | ATPase, F0 complex, subunit B/B', bacterial/chloroplast         | 15.07 | 2 | 3   |
| AT2G21280.1 | NAD(P)-binding Rossmann-fold superfamily protein                | 8.93  | 2 | 19  |
| AT3G52930.1 | Aldolase superfamily protein                                    | 23.46 | 2 | 34  |
| AT3G23450.1 | unknown protein; FUNCTIONS IN: molecular_function unknown       | 56.64 | 2 | 48  |
| AT3G23400.1 | Plastid-lipid associated protein PAP / fibrillin family protein | 33.45 | 2 | 11  |
| ATCG00720.1 | photosynthetic electron transfer B                              | 15.81 | 2 | 28  |
| AT5G42650.1 | allene oxide synthase                                           | 11.00 | 2 | 7   |
| AT3G01500.1 | carbonic anhydrase 1                                            | 49.26 | 2 | 219 |
| AT5G61410.1 | D-ribulose-5-phosphate-3-epimerase                              | 13.52 | 2 | 22  |
| AT3G59970.3 | methylenetetrahydrofolate reductase 1                           | 7.60  | 2 | 13  |
| ATCG00280.1 | photosystem II reaction center protein C                        | 6.34  | 2 | 5   |
| AT2G34420.1 | photosystem II light harvesting complex gene B1B2               | 7.55  | 2 | 19  |
| ATCG00830.1 | ribosomal protein L2                                            | 27.01 | 2 | 22  |
| AT5G40950.1 | ribosomal protein large subunit 27                              | 13.13 | 2 | 25  |
| AT3G27850.1 | ribosomal protein L12-C                                         | 19.25 | 2 | 26  |
| AT1G72370.2 | 40s ribosomal protein SA                                        | 9.86  | 2 | 2   |
| AT4G29350.1 | profilin 2                                                      | 17.56 | 2 | 8   |
| AT4G10340.1 | light harvesting complex of photosystem II 5                    | 20.00 | 2 | 7   |
| AT3G13920.2 | eukaryotic translation initiation factor 4A1                    | 10.12 | 2 | 6   |
| AT3G52380.1 | chloroplast RNA-binding protein 33                              | 13.07 | 2 | 10  |
| AT1G79850.1 | ribosomal protein S17                                           | 20.13 | 2 | 13  |
| AT1G14410.1 | ssDNA-binding transcriptional regulator                         | 11.03 | 2 | 2   |
| AT3G02560.1 | Ribosomal protein S7e family protein                            | 10.47 | 2 | 2   |
| AT2G33800.1 | Ribosomal protein S5 family protein                             | 10.89 | 2 | 7   |
| AT1G74470.1 | Pyridine nucleotide-disulphide oxidoreductase family protein    | 8.99  | 2 | 2   |
| AT1G21200.1 | sequence-specific DNA binding transcription factors             | 6.55  | 1 | 15  |
| AT3G04900.1 | Heavy metal transport/detoxification superfamily protein        | 5.77  | 1 | 37  |
| AT3G04560.1 | unknown protein; FUNCTIONS IN: molecular_function unknown       | 3.84  | 1 | 68  |
| AT1G58210.1 | kinase interacting family protein                               | 3.21  | 1 | 9   |

|             |                                                                |       |   |     |
|-------------|----------------------------------------------------------------|-------|---|-----|
| AT3G04210.1 | Disease resistance protein (TIR-NBS class)                     | 4.90  | 1 | 20  |
| AT1G56190.1 | Phosphoglycerate kinase family protein                         | 33.26 | 1 | 89  |
| AT2G25280.1 | CONTAINS InterPro DOMAIN/s: UPF0103/Mediator of ErbB2-dri      | 5.50  | 1 | 25  |
| AT2G41530.1 | S-formylglutathione hydrolase                                  | 10.56 | 1 | 6   |
| AT4G01050.1 | thylakoid rhodanese-like                                       | 5.58  | 1 | 11  |
| AT2G36460.1 | Aldolase superfamily protein                                   | 26.82 | 1 | 34  |
| AT3G46950.1 | Mitochondrial transcription termination factor family protein  | 10.00 | 1 | 29  |
| AT1G29860.1 | WRKY DNA-binding protein 71                                    | 2.13  | 1 | 35  |
| AT5G27770.1 | Ribosomal L22e protein family                                  | 9.68  | 1 | 6   |
| AT3G14415.1 | Aldolase-type TIM barrel family protein                        | 40.60 | 1 | 101 |
| AT2G26080.1 | glycine decarboxylase P-protein 2                              | 13.51 | 1 | 28  |
| AT3G19280.1 | fucosyltransferase 11                                          | 9.38  | 1 | 35  |
| ATCG00670.1 | plastid-encoded CLP P                                          | 7.65  | 1 | 1   |
| AT1G70250.1 | receptor serine/threonine kinase, putative                     | 4.88  | 1 | 20  |
| AT1G48420.1 | D-cysteine desulfhydrase                                       | 4.24  | 1 | 1   |
| AT1G35530.1 | DEAD/DEAH box RNA helicase family protein                      | 1.96  | 1 | 3   |
| AT1G67700.3 | unknown protein; FUNCTIONS IN: molecular_function unknown      | 7.86  | 1 | 10  |
| AT2G37390.1 | Chloroplast-targeted copper chaperone protein                  | 19.69 | 1 | 3   |
| AT2G30100.1 | pentatricopeptide (PPR) repeat-containing protein              | 4.97  | 1 | 33  |
| AT2G21710.1 | Mitochondrial transcription termination factor family protein  | 3.12  | 1 | 21  |
| AT3G24760.1 | Galactose oxidase/kelch repeat superfamily protein             | 5.22  | 1 | 31  |
| AT3G53780.2 | RHOMBOID-like protein 4                                        | 10.41 | 1 | 13  |
| AT3G48870.2 | Clp ATPase                                                     | 5.97  | 1 | 7   |
| AT4G22960.1 | Protein of unknown function (DUF544)                           | 5.34  | 1 | 12  |
| AT5G11470.1 | bromo-adjacent homology (BAH) domain-containing protein        | 5.28  | 1 | 39  |
| AT5G13450.2 | delta subunit of Mt ATP synthase                               | 11.05 | 1 | 10  |
| AT5G32440.2 | Ubiquitin system component Cue protein                         | 10.70 | 1 | 63  |
| AT3G18080.1 | B-S glucosidase 44                                             | 7.42  | 1 | 3   |
| AT1G22430.1 | GroES-like zinc-binding dehydrogenase family protein           | 9.79  | 1 | 9   |
| AT5G21222.1 | protein kinase family protein                                  | 2.77  | 1 | 4   |
| AT2G29550.1 | tubulin beta-7 chain                                           | 7.13  | 1 | 5   |
| AT4G38210.1 | expansin A20                                                   | 3.91  | 1 | 29  |
| AT5G16050.1 | general regulatory factor 5                                    | 11.94 | 1 | 4   |
| AT2G40550.1 | E2F target gene 1                                              | 2.04  | 1 | 33  |
| AT4G36120.1 | Plant protein of unknown function (DUF869)                     | 1.20  | 1 | 31  |
| AT4G14510.1 | CRM family member 3B                                           | 2.09  | 1 | 3   |
| AT5G35170.2 | adenylate kinase family protein                                | 2.24  | 1 | 16  |
| ATCG00470.1 | ATP synthase epsilon chain                                     | 15.91 | 1 | 14  |
| AT4G19170.1 | nine-cis-epoxycarotenoid dioxygenase 4                         | 6.55  | 1 | 2   |
| AT2G25970.1 | KH domain-containing protein                                   | 2.06  | 1 | 5   |
| AT3G60040.1 | F-box family protein                                           | 2.15  | 1 | 6   |
| AT1G18540.1 | Ribosomal protein L6 family protein                            | 5.15  | 1 | 7   |
| AT1G80270.1 | PENTATRICOPEPTIDE REPEAT 596                                   | 4.36  | 1 | 29  |
| AT3G11150.1 | 2-oxoglutarate (2OG) and Fe(II)-dependent oxygenase superfar   | 5.39  | 1 | 6   |
| AT2G37230.1 | Tetratricopeptide repeat (TPR)-like superfamily protein        | 3.43  | 1 | 4   |
| AT2G25090.1 | CBL-interacting protein kinase 16                              | 8.10  | 1 | 17  |
| AT3G26060.1 | Thioredoxin superfamily protein                                | 7.87  | 1 | 7   |
| AT1G17100.1 | SOUL heme-binding family protein                               | 26.72 | 1 | 11  |
| AT4G25050.1 | acyl carrier protein 4                                         | 11.68 | 1 | 3   |
| AT5G58880.1 | unknown protein; BEST Arabidopsis thaliana protein match is: u | 4.32  | 1 | 4   |
| AT1G72150.1 | PATELLIN 1                                                     | 3.66  | 1 | 2   |
| AT2G46820.1 | photosystem I P subunit                                        | 20.11 | 1 | 24  |
| AT3G02730.1 | thioredoxin F-type 1                                           | 6.74  | 1 | 3   |
| ATCG00160.1 | ribosomal protein S2                                           | 8.47  | 1 | 4   |
| AT2G18020.1 | Ribosomal protein L2 family                                    | 7.36  | 1 | 7   |
| AT3G05560.1 | Ribosomal L22e protein family                                  | 14.52 | 1 | 17  |

|             |                                                                 |       |   |    |
|-------------|-----------------------------------------------------------------|-------|---|----|
| AT5G09500.1 | Ribosomal protein S19 family protein                            | 11.33 | 1 | 10 |
| AT1G79040.1 | photosystem II subunit R                                        | 11.43 | 1 | 20 |
| AT4G27440.1 | protochlorophyllide oxidoreductase B                            | 9.23  | 1 | 10 |
| AT5G27100.1 | glutamate receptor 2.1                                          | 1.89  | 1 | 16 |
| AT5G48300.1 | ADP glucose pyrophosphorylase 1                                 | 4.62  | 1 | 5  |
| AT3G54050.1 | high cyclic electron flow 1                                     | 7.91  | 1 | 8  |
| AT5G62790.1 | 1-deoxy-D-xylulose 5-phosphate reductoisomerase                 | 7.13  | 1 | 7  |
| AT2G43750.1 | O-acetylserine (thiol) lyase B                                  | 6.38  | 1 | 2  |
| AT1G05470.1 | DNase I-like superfamily protein                                | 1.30  | 1 | 5  |
| AT1G05910.1 | cell division cycle protein 48-related / CDC48-related          | 1.40  | 1 | 31 |
| AT1G52510.2 | alpha/beta-Hydrolases superfamily protein                       | 6.60  | 1 | 1  |
| AT1G22930.2 | T-complex protein 11                                            | 2.25  | 1 | 10 |
| AT3G05270.1 | Plant protein of unknown function (DUF869)                      | 3.25  | 1 | 2  |
| AT3G25530.2 | glyoxylate reductase 1                                          | 29.14 | 1 | 10 |
| AT4G08850.2 | Leucine-rich repeat receptor-like protein kinase family protein | 2.28  | 1 | 3  |
| AT5G45775.1 | Ribosomal L5P family protein                                    | 8.14  | 1 | 4  |
| AT5G44690.1 | unknown protein; BEST Arabidopsis thaliana protein match is: u  | 5.59  | 1 | 10 |
| ATCG00270.1 | photosystem II reaction center protein D                        | 9.35  | 1 | 8  |
| AT1G31330.1 | photosystem I subunit F                                         | 13.12 | 1 | 5  |
| AT1G15820.1 | light harvesting complex photosystem II subunit 6               | 15.89 | 1 | 5  |
| AT4G01150.1 | unknown protein; FUNCTIONS IN: molecular_function unknown       | 6.10  | 1 | 6  |
| AT2G19430.1 | DWD (DDB1-binding WD40 protein) hypersensitive to ABA 1         | 3.00  | 1 | 9  |
| AT3G04920.1 | Ribosomal protein S24e family protein                           | 11.28 | 1 | 2  |
| AT4G28750.1 | Photosystem I reaction centre subunit IV / PsaE protein         | 30.07 | 1 | 3  |
| AT1G59900.1 | pyruvate dehydrogenase complex E1 alpha subunit                 | 3.60  | 1 | 1  |
| AT2G35370.1 | glycine decarboxylase complex H                                 | 21.82 | 1 | 8  |
| AT2G39580.1 | CONTAINS InterPro DOMAIN/s: Putative zinc-finger domain (Int    | 1.78  | 1 | 7  |
| AT3G56940.2 | dicarboxylate diiron protein, putative (Crd1)                   | 4.22  | 1 | 3  |
| AT4G08870.2 | Arginase/deacetylase superfamily protein                        | 5.32  | 1 | 3  |
| AT4G04460.2 | Sapoin-like aspartyl protease family protein                    | 2.38  | 1 | 5  |
| AT5G60600.3 | 4-hydroxy-3-methylbut-2-enyl diphosphate synthase               | 4.32  | 1 | 2  |
| AT3G14210.1 | epithiospecifier modifier 1                                     | 7.91  | 1 | 7  |
| AT4G04020.1 | fibrillin                                                       | 17.30 | 1 | 5  |
| AT1G71500.1 | Rieske (2Fe-2S) domain-containing protein                       | 5.23  | 1 | 1  |
| AT3G63410.1 | S-adenosyl-L-methionine-dependent methyltransferases superfa    | 5.33  | 1 | 6  |
| AT5G38780.1 | S-adenosyl-L-methionine-dependent methyltransferases superfa    | 3.60  | 1 | 3  |
| AT5G02570.1 | Histone superfamily protein                                     | 11.36 | 1 | 1  |
| AT3G55440.1 | triosephosphate isomerase                                       | 22.44 | 1 | 7  |
| ATCG00730.1 | photosynthetic electron transfer D                              | 21.88 | 1 | 8  |
| AT1G61520.2 | photosystem I light harvesting complex gene 3                   | 23.39 | 1 | 9  |
| AT5G09660.2 | peroxisomal NAD-malate dehydrogenase 2                          | 5.11  | 1 | 4  |
| AT5G09650.1 | pyrophosphorylase 6                                             | 3.67  | 1 | 5  |
| AT1G27090.1 | glycine-rich protein                                            | 5.71  | 1 | 4  |
| AT4G28390.1 | ADP/ATP carrier 3                                               | 2.90  | 1 | 5  |
| AT3G61470.1 | photosystem I light harvesting complex gene 2                   | 27.24 | 1 | 9  |
| AT1G01090.1 | pyruvate dehydrogenase E1 alpha                                 | 2.80  | 1 | 2  |
| AT4G09570.1 | calcium-dependent protein kinase 4                              | 5.59  | 1 | 4  |
| AT1G72610.1 | germin-like protein 1                                           | 4.33  | 1 | 6  |
| AT5G17310.1 | UDP-glucose pyrophosphorylase 2                                 | 11.79 | 1 | 4  |
| AT4G28730.1 | Glutaredoxin family protein                                     | 12.64 | 1 | 2  |
| AT3G29320.1 | Glycosyl transferase, family 35                                 | 3.01  | 1 | 7  |
| AT4G34620.1 | small subunit ribosomal protein 16                              | 13.27 | 1 | 3  |
| AT5G30510.1 | ribosomal protein S1                                            | 3.61  | 1 | 4  |
| AT3G56340.1 | Ribosomal protein S26e family protein                           | 11.54 | 1 | 1  |
| AT3G52150.1 | RNA-binding (RRM/RBD/RNP motifs) family protein                 | 11.86 | 1 | 2  |
| AT1G76010.1 | Alba DNA/RNA-binding protein                                    | 3.14  | 1 | 6  |

|             |                                                                |       |   |    |
|-------------|----------------------------------------------------------------|-------|---|----|
| AT5G20290.1 | Ribosomal protein S8e family protein                           | 6.76  | 1 | 5  |
| AT5G43040.1 | Cysteine/Histidine-rich C1 domain family protein               | 3.45  | 1 | 1  |
| AT1G58380.1 | Ribosomal protein S5 family protein                            | 12.68 | 1 | 2  |
| ATCG00750.1 | ribosomal protein S11                                          | 10.87 | 1 | 5  |
| ATCG00790.1 | ribosomal protein L16                                          | 10.37 | 1 | 1  |
| AT3G25920.1 | ribosomal protein L15                                          | 6.86  | 1 | 3  |
| ATCG00340.1 | Photosystem I, PsaA/PsaB protein                               | 1.63  | 1 | 2  |
| AT1G18100.1 | PEBP (phosphatidylethanolamine-binding protein) family protein | 16.18 | 1 | 1  |
| AT1G03630.2 | protochlorophyllide oxidoreductase C                           | 4.76  | 1 | 3  |
| AT1G67430.2 | Ribosomal protein L22p/L17e family protein                     | 7.63  | 1 | 1  |
| AT5G17880.1 | disease resistance protein (TIR-NBS-LRR class)                 | 3.51  | 1 | 3  |
| AT5G26742.3 | DEAD box RNA helicase (RH3)                                    | 2.14  | 1 | 1  |
| AT3G25860.1 | 2-oxoacid dehydrogenases acyltransferase family protein        | 5.42  | 1 | 2  |
| AT4G29060.1 | elongation factor Ts family protein                            | 3.15  | 1 | 2  |
| AT2G43030.1 | Ribosomal protein L3 family protein                            | 4.80  | 1 | 2  |
| AT1G56590.1 | Clathrin adaptor complexes medium subunit family protein       | 5.78  | 1 | 12 |
| AT2G02740.2 | ssDNA-binding transcriptional regulator                        | 4.87  | 1 | 1  |
| AT3G06650.1 | ATP-citrate lyase B-1                                          | 2.47  | 1 | 2  |
| AT1G54780.1 | thylakoid lumen 18.3 kDa protein                               | 5.96  | 1 | 1  |
| AT2G27360.1 | GDSL-like Lipase/Acylhydrolase superfamily protein             | 7.36  | 1 | 2  |
| AT5G51970.1 | GroES-like zinc-binding alcohol dehydrogenase family protein   | 7.14  | 1 | 1  |
| AT3G06990.1 | Cysteine/Histidine-rich C1 domain family protein               | 4.64  | 1 | 15 |
| ATCG00800.1 | structural constituent of ribosome                             | 17.43 | 1 | 2  |
| AT5G51820.1 | phosphoglucomutase                                             | 1.93  | 1 | 1  |
| AT5G20890.1 | TCP-1/cpn60 chaperonin family protein                          | 4.17  | 1 | 1  |
| AT2G23600.1 | acetone-cyanohydrin lyase                                      | 6.46  | 1 | 1  |
| AT5G01530.1 | light harvesting complex photosystem II                        | 4.48  | 1 | 1  |
| AT2G45840.1 | Arabidopsis thaliana protein of unknown function (DUF821)      | 2.49  | 1 | 1  |
| AT3G60240.2 | eukaryotic translation initiation factor 4G                    | 2.21  | 1 | 3  |
| AT1G74230.1 | glycine-rich RNA-binding protein 5                             | 5.54  | 1 | 1  |
| AT2G05520.1 | glycine-rich protein 3                                         | 28.97 | 1 | 1  |
| AT2G35410.1 | RNA-binding (RRM/RBD/RNP motifs) family protein                | 4.55  | 1 | 1  |
| AT1G01080.1 | RNA-binding (RRM/RBD/RNP motifs) family protein                | 5.46  | 1 | 1  |
| AT1G63940.3 | monodehydroascorbate reductase 6                               | 4.33  | 1 | 1  |
| AT3G52960.1 | Thioredoxin superfamily protein                                | 4.70  | 1 | 1  |
| AT1G05190.1 | Ribosomal protein L6 family                                    | 5.38  | 1 | 1  |
| AT4G09020.1 | isoamylase 3                                                   | 2.09  | 1 | 1  |
| AT1G76030.1 | ATPase, V1 complex, subunit B protein                          | 3.09  | 1 | 1  |
| AT3G50820.1 | photosystem II subunit O-2                                     | 7.55  | 1 | 1  |
| AT5G19220.1 | ADP glucose pyrophosphorylase large subunit 1                  | 4.60  | 1 | 2  |

| UCUGUAGAUUUUCUGUAGAUU |          |               |          | UNUUGGHACUUUNUUGGHAC |          |               |
|-----------------------|----------|---------------|----------|----------------------|----------|---------------|
| Rep 1                 |          | Rep 2         |          | Rep 1                |          |               |
| # Peptides A2         | # PSM A2 | # Peptides B2 | # PSM B2 | # Peptides C2        | # PSM C2 | # Peptides D2 |
| 14                    | 59       | 16            | 63       | 22                   | 104      | 22            |
| 9                     | 11       | 7             | 9        | 18                   | 39       | 18            |
| 9                     | 27       | 10            | 31       | 12                   | 47       | 13            |
| 11                    | 20       | 8             | 24       | 17                   | 58       | 15            |
| 6                     | 9        | 7             | 13       | 9                    | 19       | 13            |
| 5                     | 12       | 9             | 17       | 12                   | 36       | 12            |
| 1                     | 3        | 2             | 3        | 7                    | 13       | 8             |
| 12                    | 31       | 12            | 39       | 14                   | 45       | 13            |
| 1                     | 1        | 3             | 3        | 4                    | 6        | 2             |
| 2                     | 5        | 2             | 6        | 4                    | 11       | 4             |
| 5                     | 7        | 3             | 4        | 7                    | 15       | 7             |
| 1                     | 1        | 2             | 2        | 2                    | 2        | 6             |
| 2                     | 4        | 3             | 6        | 7                    | 13       | 5             |
| 8                     | 21       | 8             | 25       | 11                   | 32       | 10            |
| 2                     | 2        | 2             | 2        | 2                    | 5        | 4             |
| 6                     | 23       | 7             | 23       | 8                    | 41       | 9             |
|                       |          |               |          | 3                    | 4        | 1             |
|                       |          |               |          | 2                    | 2        | 1             |
| 1                     | 2        | 2             | 2        | 3                    | 4        | 4             |
| 2                     | 2        | 1             | 1        | 2                    | 2        | 3             |
| 2                     | 2        | 5             | 6        | 4                    | 11       | 5             |
| 3                     | 4        | 1             | 1        | 7                    | 20       | 4             |
| 1                     | 3        | 1             | 3        | 5                    | 10       | 6             |
| 3                     | 4        | 3             | 8        | 4                    | 10       | 5             |
| 1                     | 1        | 2             | 3        | 5                    | 12       | 4             |
| 1                     | 1        | 3             | 4        | 5                    | 8        | 4             |
|                       |          | 1             | 1        | 4                    | 4        | 2             |
|                       |          | 2             | 2        | 3                    | 9        | 3             |
|                       |          |               |          | 3                    | 5        | 4             |
| 1                     | 2        | 2             | 6        | 5                    | 11       | 3             |
| 1                     | 1        |               |          | 3                    | 12       | 5             |
| 5                     | 14       | 5             | 15       | 8                    | 32       | 7             |
| 1                     | 1        | 4             | 5        | 4                    | 9        | 5             |
| 8                     | 19       | 8             | 23       | 11                   | 37       | 13            |
| 2                     | 4        | 4             | 5        | 2                    | 5        | 4             |
| 6                     | 7        | 6             | 12       | 6                    | 24       | 8             |
|                       |          | 1             | 1        | 3                    | 3        | 2             |
|                       |          | 1             | 1        | 2                    | 5        | 2             |
| 2                     | 2        | 1             | 1        | 2                    | 2        | 2             |
| 2                     | 2        | 3             | 3        | 1                    | 1        | 1             |
| 4                     | 10       | 4             | 8        | 7                    | 26       | 7             |
| 1                     | 1        | 2             | 2        | 4                    | 13       | 4             |
| 1                     | 1        | 1             | 1        | 1                    | 2        |               |
| 1                     | 2        | 1             | 1        |                      |          | 2             |
| 3                     | 4        | 3             | 6        | 6                    | 24       | 8             |
| 1                     | 1        | 1             | 1        | 2                    | 5        | 3             |
| 1                     | 1        |               |          | 2                    | 4        | 3             |
|                       |          | 1             | 1        | 2                    | 2        | 2             |
|                       |          |               |          | 2                    | 3        | 2             |
|                       |          |               |          |                      |          | 2             |
| 1                     | 1        |               |          |                      |          |               |
| 1                     | 1        | 1             | 1        |                      |          |               |
| 1                     | 1        |               |          | 2                    | 2        |               |

|   |    |   |    |   |    |    |
|---|----|---|----|---|----|----|
| 2 | 2  | 1 | 1  | 1 | 1  | 3  |
| 2 | 7  | 2 | 9  | 4 | 8  | 3  |
| 2 | 4  | 3 | 8  | 4 | 15 | 5  |
| 1 | 1  | 1 | 1  | 2 | 2  | 1  |
| 1 | 1  |   |    | 1 | 1  |    |
| 7 | 15 | 7 | 19 | 9 | 26 | 11 |
| 1 | 2  | 3 | 3  | 9 | 14 | 5  |
| 1 | 2  | 1 | 1  | 1 | 1  |    |
|   |    | 1 | 1  | 1 | 4  | 2  |
|   |    | 1 | 2  |   |    | 2  |
|   |    | 1 | 1  | 2 | 2  |    |
|   |    |   |    | 1 | 4  | 3  |
|   |    |   |    | 1 | 2  | 2  |
|   |    |   |    | 1 | 1  | 2  |
|   |    |   |    | 3 | 4  |    |
|   |    |   |    | 1 | 1  | 1  |
|   |    |   |    | 1 | 2  | 1  |
|   |    |   |    |   |    | 1  |
|   |    |   |    |   |    | 2  |
|   |    |   |    |   |    | 1  |
|   |    |   |    |   |    |    |
|   |    |   |    |   |    |    |
|   |    |   |    |   |    |    |
|   |    |   |    |   |    |    |
|   |    |   |    |   |    |    |
|   |    |   |    |   |    |    |
|   |    |   |    |   |    |    |
| 1 | 2  |   |    | 1 | 1  | 3  |
| 1 | 1  | 1 | 1  | 2 | 2  |    |
| 1 | 1  |   |    |   |    | 1  |
| 1 | 2  |   |    | 1 | 2  | 1  |
| 1 | 2  |   |    | 1 | 2  | 3  |
| 1 | 2  | 1 | 2  | 5 | 8  | 1  |
| 1 | 1  |   |    | 4 | 5  | 2  |
| 1 | 1  |   |    |   |    |    |
| 1 | 1  |   |    | 1 | 1  |    |
| 3 | 5  | 4 | 9  | 5 | 18 | 5  |
|   |    | 1 | 1  | 1 | 3  | 1  |
|   |    | 1 | 4  | 1 | 1  |    |
|   |    | 1 | 1  |   |    |    |
|   |    |   |    | 1 | 4  |    |
|   |    |   |    | 1 | 1  | 1  |
|   |    |   |    | 1 | 2  | 1  |
|   |    |   |    | 2 | 3  | 2  |
|   |    |   |    | 1 | 1  |    |
|   |    |   |    |   |    | 1  |
|   |    |   |    |   |    | 3  |
|   |    |   |    |   |    | 1  |
|   |    |   |    |   |    |    |
|   |    |   |    |   |    |    |
|   |    |   |    |   |    |    |
|   |    |   |    |   |    |    |
| 1 | 1  |   |    |   |    |    |
| 1 | 4  | 1 | 3  | 1 | 3  | 1  |
| 1 | 1  | 1 | 2  | 1 | 7  | 1  |
| 2 | 2  | 1 | 1  |   |    |    |

|   |   |   |   |   |   |   |
|---|---|---|---|---|---|---|
| 1 | 4 | 1 | 2 | 1 | 1 | 1 |
| 2 | 4 | 1 | 2 | 3 | 7 | 3 |
| 1 | 3 | 1 | 2 | 1 | 1 | 1 |
| 1 | 1 |   |   |   |   | 1 |
| 1 | 1 |   |   |   |   |   |
| 1 | 2 |   |   | 1 | 2 | 3 |
| 1 | 3 | 1 | 1 | 1 | 2 | 2 |
| 1 | 2 | 1 | 3 | 1 | 3 | 1 |
| 1 | 1 |   |   | 1 | 1 | 1 |
| 1 | 2 | 2 | 2 | 4 | 7 | 4 |
| 1 | 1 | 1 | 1 | 1 | 1 | 2 |
| 1 | 2 | 1 | 2 | 1 | 3 | 1 |
| 1 | 1 |   |   |   |   |   |
| 1 | 1 | 1 | 1 | 2 | 3 | 1 |
| 1 | 1 |   |   |   |   |   |
| 1 | 1 |   |   | 1 | 1 |   |
| 1 | 1 |   |   | 1 | 2 | 1 |
| 1 | 2 |   |   |   |   |   |
| 1 | 2 | 1 | 1 | 2 | 6 | 1 |
| 1 | 3 |   |   | 1 | 1 | 1 |
| 1 | 2 | 1 | 4 |   |   |   |
| 1 | 1 | 1 | 2 |   |   |   |
| 1 | 1 |   |   | 2 | 2 |   |
| 1 | 1 |   |   |   |   |   |
| 1 | 1 |   |   | 1 | 4 | 1 |
| 1 | 1 |   |   |   |   |   |
| 1 | 6 | 1 | 3 | 1 | 4 | 1 |
|   |   | 1 | 1 |   |   |   |
|   |   | 2 | 2 |   |   | 1 |
|   |   | 1 | 2 |   |   |   |
|   |   | 1 | 1 |   |   | 1 |
|   |   | 1 | 1 | 1 | 3 | 1 |
|   |   | 1 | 1 |   |   |   |
|   |   | 1 | 1 | 1 | 4 | 1 |
|   |   | 1 | 1 | 1 | 4 | 1 |
|   |   | 1 | 1 |   |   |   |
|   |   | 1 | 1 | 1 | 2 |   |
|   |   | 1 | 1 | 1 | 1 | 1 |
|   |   |   |   | 1 | 1 |   |
|   |   |   |   | 1 | 2 |   |
|   |   |   |   | 1 | 1 |   |
|   |   |   |   | 1 | 1 | 1 |
|   |   |   |   | 1 | 3 | 1 |
|   |   |   |   | 1 | 2 | 1 |
|   |   |   |   | 1 | 1 | 1 |
|   |   |   |   | 1 | 2 | 1 |
|   |   |   |   | 1 | 1 | 1 |
|   |   |   |   | 2 | 3 |   |
|   |   |   |   | 1 | 1 |   |
|   |   |   |   | 1 | 1 |   |
|   |   |   |   | 1 | 1 |   |
|   |   |   |   | 2 | 4 | 1 |
|   |   |   |   | 1 | 1 | 1 |
|   |   |   |   | 1 | 1 | 1 |
|   |   |   |   | 1 | 1 |   |
|   |   |   |   | 1 | 1 | 1 |







| CU       | UGAUAUUGGANUUUGAUAUUGGANU |          |               |          | UU/           |
|----------|---------------------------|----------|---------------|----------|---------------|
| Rep 2    | Rep 1                     |          | Rep 2         |          | R             |
| # PSM D2 | # Peptides E2             | # PSM E2 | # Peptides F2 | # PSM F2 | # Peptides G2 |
| 94       | 18                        | 79       | 21            | 88       | 21            |
| 36       | 18                        | 32       | 14            | 30       | 17            |
| 47       | 11                        | 43       | 12            | 58       | 13            |
| 63       | 15                        | 45       | 14            | 46       | 16            |
| 29       | 9                         | 21       | 13            | 29       | 12            |
| 37       | 10                        | 27       | 10            | 28       | 12            |
| 16       | 6                         | 10       | 5             | 11       | 7             |
| 52       | 12                        | 44       | 14            | 49       | 12            |
| 3        | 2                         | 3        | 4             | 5        | 1             |
| 10       | 3                         | 4        | 4             | 5        | 5             |
| 13       | 6                         | 12       | 7             | 16       | 8             |
| 6        | 4                         | 4        | 1             | 1        | 1             |
| 12       | 4                         | 10       | 3             | 7        | 4             |
| 39       | 8                         | 30       | 10            | 25       | 9             |
| 7        | 5                         | 9        | 4             | 7        | 2             |
| 41       | 9                         | 33       | 9             | 39       | 8             |
| 1        | 1                         | 1        | 1             | 3        | 1             |
| 1        | 2                         | 2        | 1             | 1        | 2             |
| 4        | 5                         | 6        | 4             | 5        | 3             |
| 3        | 1                         | 1        |               |          |               |
| 13       | 4                         | 9        | 4             | 10       | 7             |
| 13       | 1                         | 3        | 4             | 8        | 4             |
| 11       | 2                         | 5        | 2             | 5        | 4             |
| 12       | 5                         | 10       | 6             | 13       | 7             |
| 9        | 4                         | 10       | 5             | 10       | 4             |
| 8        | 2                         | 3        | 3             | 6        | 6             |
| 2        | 1                         | 1        | 2             | 2        | 2             |
| 8        | 3                         | 8        | 2             | 6        | 5             |
| 7        | 4                         | 5        | 3             | 5        | 5             |
| 7        | 2                         | 3        | 2             | 8        | 2             |
| 17       | 3                         | 7        | 4             | 10       | 3             |
| 28       | 7                         | 22       | 7             | 24       | 7             |
| 11       | 4                         | 9        | 4             | 7        | 4             |
| 38       | 10                        | 31       | 10            | 32       | 13            |
| 11       | 2                         | 4        | 2             | 6        | 3             |
| 24       | 7                         | 21       | 7             | 20       | 7             |
| 4        |                           |          |               |          | 2             |
| 5        | 2                         | 7        | 3             | 6        | 5             |
| 2        | 2                         | 2        | 1             | 3        | 1             |
| 3        | 1                         | 2        | 2             | 4        | 3             |
| 24       | 7                         | 19       | 6             | 17       | 7             |
| 11       | 4                         | 7        | 4             | 6        | 4             |
|          |                           |          | 1             | 1        | 1             |
| 3        | 3                         | 3        |               |          | 2             |
| 22       | 7                         | 18       | 7             | 19       | 7             |
| 6        | 2                         | 6        | 2             | 5        | 3             |
| 3        | 1                         | 1        | 1             | 1        | 1             |
| 2        | 1                         | 2        | 1             | 3        | 1             |
| 2        |                           |          | 1             | 1        |               |
| 2        | 1                         | 1        | 2             | 3        | 1             |
|          | 1                         | 1        |               |          | 2             |
|          |                           |          |               |          | 2             |
|          |                           |          | 1             | 1        | 1             |

|    |   |   |    |   |    |    |
|----|---|---|----|---|----|----|
| 3  | 1 | 1 |    |   |    | 1  |
| 12 | 2 |   | 8  | 3 | 6  | 3  |
| 18 | 3 |   | 10 | 5 | 7  | 5  |
| 1  | 1 |   | 1  | 1 | 1  |    |
|    | 1 |   | 3  | 2 | 2  | 1  |
| 27 | 8 |   | 26 | 8 | 22 | 11 |
| 9  | 7 |   | 13 | 2 | 5  | 7  |
|    | 1 |   | 2  |   |    | 1  |
| 5  | 1 |   | 2  | 2 | 2  | 3  |
| 2  | 1 |   | 2  | 2 | 2  | 1  |
|    | 1 |   | 1  | 2 | 3  | 3  |
| 7  | 1 |   | 1  | 1 | 1  |    |
| 3  | 1 |   | 1  | 1 | 2  | 1  |
| 5  | 2 |   | 4  |   |    | 4  |
|    |   |   |    |   |    | 2  |
| 1  | 1 |   | 1  | 1 | 2  | 2  |
| 1  | 1 |   | 1  |   |    | 2  |
| 2  | 2 |   | 4  | 2 | 2  | 1  |
| 2  |   |   |    | 1 | 1  | 1  |
| 1  |   |   |    | 2 | 2  |    |
|    | 1 |   | 1  |   |    | 1  |
|    |   |   |    |   |    | 3  |
|    |   |   |    |   |    | 3  |
|    |   |   |    |   |    | 2  |
| 4  | 1 |   | 1  | 2 | 4  | 3  |
|    |   |   |    | 1 | 1  | 1  |
| 1  |   |   |    |   |    |    |
| 1  | 1 |   | 3  | 1 | 2  | 1  |
| 4  | 1 |   | 1  | 1 | 2  | 3  |
| 3  | 3 |   | 7  | 3 | 5  | 2  |
| 2  | 1 |   | 1  |   |    |    |
|    |   |   |    |   |    | 2  |
|    |   |   |    | 1 | 1  |    |
| 20 | 4 |   | 14 | 8 | 11 | 7  |
| 3  | 2 |   | 2  | 1 | 2  | 2  |
|    |   |   |    |   |    | 1  |
|    |   |   |    | 1 | 1  | 1  |
|    | 1 |   | 3  | 1 | 1  | 1  |
| 1  | 1 |   | 1  |   |    | 2  |
| 1  |   |   |    |   |    | 2  |
| 4  | 2 |   | 2  | 2 | 3  | 2  |
|    |   |   |    |   |    | 1  |
| 1  | 1 |   | 1  | 1 | 2  | 1  |
| 4  | 1 |   | 1  |   |    | 1  |
| 1  |   |   |    |   |    |    |
|    | 2 |   | 2  | 1 | 2  |    |
|    | 1 |   | 1  | 1 | 1  | 1  |
|    |   |   |    |   |    | 1  |
|    |   |   |    |   |    | 1  |
|    |   |   |    |   |    | 2  |
|    |   |   |    |   |    |    |
|    | 1 |   | 1  | 1 | 1  | 1  |
| 2  | 1 |   | 3  | 1 | 2  | 1  |
| 7  | 1 |   | 7  | 1 | 8  | 1  |
|    | 1 |   | 2  |   |    |    |

|   |   |    |   |   |   |
|---|---|----|---|---|---|
| 2 | 1 | 1  | 1 | 3 |   |
| 6 | 3 | 6  | 3 | 6 | 6 |
| 1 |   |    |   |   | 1 |
| 1 |   |    | 1 | 1 |   |
|   |   |    | 1 | 1 | 1 |
| 4 |   |    | 1 | 2 | 3 |
| 3 | 1 | 1  | 2 | 3 | 2 |
| 4 | 1 | 3  | 1 | 4 | 1 |
| 1 |   |    |   |   |   |
| 7 | 5 | 11 | 2 | 5 | 6 |
| 2 | 2 | 2  | 1 | 1 |   |
| 4 | 1 | 4  | 2 | 3 | 1 |
|   |   |    |   |   |   |
| 2 | 1 | 2  | 1 | 2 | 1 |
|   |   |    |   |   |   |
|   |   |    |   |   | 1 |
| 1 | 1 | 1  |   |   | 1 |
|   |   |    |   |   |   |
| 3 | 1 | 2  | 1 | 3 | 1 |
| 1 | 1 | 2  | 1 | 3 | 1 |
|   | 1 | 7  | 1 | 2 | 1 |
|   | 2 | 2  | 1 | 2 | 1 |
|   | 1 | 1  |   |   | 2 |
|   | 1 | 1  |   |   | 1 |
| 4 | 1 | 4  | 1 | 3 | 1 |
|   | 1 | 1  |   |   |   |
| 5 | 1 | 6  | 1 | 7 | 1 |
|   |   |    |   |   | 1 |
| 1 | 1 | 1  |   |   | 1 |
|   |   |    |   |   |   |
| 1 | 1 | 1  |   |   | 1 |
| 2 | 1 | 3  | 1 | 3 | 1 |
|   | 1 | 2  |   |   | 1 |
| 4 | 1 | 4  | 1 | 4 | 1 |
| 4 | 1 | 4  | 1 | 4 | 1 |
|   |   |    | 1 | 1 |   |
|   | 1 | 2  | 1 | 3 | 1 |
| 2 | 1 | 1  | 1 | 1 |   |
|   |   |    |   |   |   |
|   |   |    | 1 | 1 | 1 |
| 1 | 1 | 1  |   |   | 1 |
| 3 | 1 | 2  | 1 | 3 | 1 |
| 4 |   |    |   |   |   |
| 1 |   |    | 1 | 1 |   |
| 1 | 2 | 3  | 1 | 1 | 1 |
| 1 | 1 | 1  | 1 | 1 |   |
|   |   |    |   |   | 1 |
|   |   |    |   |   | 1 |
|   |   |    |   |   |   |
| 2 | 1 | 2  | 2 | 4 | 1 |
| 2 |   |    |   |   |   |
| 1 |   |    |   |   |   |
|   |   |    |   |   | 1 |
| 1 | 1 | 2  | 2 | 2 | 2 |





| AAAGGUGGAAAUUUUAAAGGUGGAAU |               |          | No RNA        |          |               |
|----------------------------|---------------|----------|---------------|----------|---------------|
| Rep 1                      | Rep 2         |          | Rep 1         |          | Rep 2         |
| # PSM G2                   | # Peptides H2 | # PSM H2 | # Peptides I2 | # PSM I2 | # Peptides J2 |
| 104                        | 20            | 93       | 32            | 192      | 31            |
| 42                         | 20            | 46       | 1             | 1        | 1             |
| 52                         | 13            | 73       | 12            | 53       | 11            |
| 60                         | 15            | 62       | 14            | 44       | 15            |
| 33                         | 12            | 29       | 7             | 17       | 9             |
| 39                         | 12            | 43       | 13            | 35       | 15            |
| 14                         | 8             | 16       | 9             | 23       | 8             |
| 46                         | 13            | 54       | 15            | 62       | 14            |
| 3                          |               |          | 7             | 12       | 10            |
| 7                          | 4             | 6        | 6             | 16       | 6             |
| 16                         | 8             | 19       | 3             | 7        | 5             |
| 1                          | 3             | 4        | 8             | 12       | 6             |
| 9                          | 4             | 12       | 6             | 22       | 7             |
| 31                         | 10            | 35       | 12            | 46       | 15            |
| 5                          | 5             | 9        | 12            | 25       | 13            |
| 41                         | 9             | 40       | 13            | 83       | 13            |
| 2                          | 2             | 3        | 3             | 4        | 1             |
| 3                          | 3             | 3        | 5             | 5        | 2             |
| 5                          | 5             | 8        | 3             | 6        | 1             |
|                            | 1             | 1        | 1             | 1        | 2             |
| 12                         | 4             | 11       | 3             | 8        | 5             |
| 10                         | 5             | 10       | 2             | 3        | 2             |
| 8                          | 6             | 10       | 1             | 3        | 2             |
| 11                         | 6             | 18       | 4             | 10       | 4             |
| 11                         | 5             | 12       | 3             | 5        | 3             |
| 12                         | 4             | 10       | 3             | 3        | 3             |
| 2                          | 2             | 2        |               |          |               |
| 11                         | 3             | 8        | 4             | 10       | 2             |
| 12                         | 6             | 10       | 3             | 7        | 3             |
| 7                          | 3             | 7        | 4             | 8        | 4             |
| 8                          | 2             | 8        |               |          |               |
| 32                         | 7             | 34       | 10            | 51       | 11            |
| 4                          | 5             | 6        | 1             | 2        | 1             |
| 41                         | 11            | 37       | 8             | 25       | 11            |
| 8                          | 4             | 7        | 2             | 2        | 2             |
| 19                         | 7             | 22       | 11            | 35       | 9             |
| 2                          | 2             | 2        | 1             | 1        | 2             |
| 9                          | 4             | 10       | 5             | 9        | 4             |
| 2                          | 2             | 2        | 1             | 3        |               |
| 3                          | 3             | 5        | 1             | 1        |               |
| 32                         | 7             | 27       | 9             | 35       | 9             |
| 7                          | 4             | 7        | 2             | 3        | 1             |
| 1                          | 1             | 2        |               |          | 2             |
| 3                          | 2             | 2        | 3             | 7        | 1             |
| 18                         | 7             | 20       | 7             | 17       | 5             |
| 7                          | 2             | 5        | 2             | 5        | 2             |
| 1                          | 3             | 3        | 2             | 2        | 4             |
| 2                          | 2             | 3        |               |          |               |
|                            | 2             | 3        | 4             | 7        | 3             |
| 2                          | 2             | 4        | 1             | 1        |               |
| 3                          | 1             | 1        | 1             | 1        |               |
| 3                          | 1             | 2        |               |          |               |
| 1                          |               |          | 1             | 1        |               |



|    |   |    |   |    |    |
|----|---|----|---|----|----|
| 1  | 1 | 1  | 2 | 3  |    |
| 9  | 4 | 11 | 6 | 15 | 6  |
| 20 | 4 | 11 | 8 | 36 | 7  |
|    | 2 | 2  |   |    | 1  |
| 1  | 1 | 1  |   |    | 3  |
| 32 | 8 | 27 | 7 | 20 | 10 |
| 15 | 6 | 12 | 5 | 8  | 5  |
| 1  | 1 | 1  | 3 | 7  | 5  |
| 4  | 2 | 5  | 2 | 4  | 2  |
| 2  | 1 | 1  |   |    |    |
| 4  | 2 | 3  | 3 | 7  | 3  |
|    | 2 | 3  |   |    |    |
| 1  | 1 | 1  | 1 | 4  | 2  |
| 7  | 4 | 6  |   |    |    |
| 2  | 1 | 1  | 2 | 2  | 2  |
| 3  | 2 | 2  | 1 | 2  | 1  |
| 4  | 1 | 2  |   |    |    |
| 1  | 2 | 3  | 1 | 1  | 2  |
| 1  | 3 | 3  | 3 | 9  | 2  |
|    |   |    |   |    |    |
| 1  | 1 | 1  |   |    | 1  |
| 5  | 2 | 3  |   |    |    |
| 3  |   |    |   |    |    |
| 4  | 2 | 5  |   |    |    |
|    |   |    | 1 | 1  | 2  |
| 5  | 2 | 2  | 3 | 4  | 3  |
| 2  | 1 | 1  |   |    | 2  |
|    | 1 | 1  |   |    |    |
| 1  | 2 | 2  | 1 | 1  | 1  |
| 4  | 1 | 1  | 5 | 7  | 3  |
| 5  | 3 | 4  | 1 | 2  |    |
|    |   |    | 1 | 1  |    |
| 6  | 2 | 4  | 1 | 5  | 1  |
|    |   |    |   |    | 1  |
| 25 | 6 | 16 | 7 | 32 | 6  |
| 2  | 1 | 1  | 1 | 2  | 1  |
| 1  |   |    | 1 | 1  | 2  |
| 1  | 1 | 2  |   |    |    |
| 3  | 2 | 4  |   |    | 1  |
| 3  | 2 | 4  | 1 | 1  |    |
| 5  | 2 | 4  |   |    |    |
| 3  | 2 | 4  | 1 | 1  | 1  |
| 1  |   |    |   |    |    |
| 1  | 1 | 1  |   |    | 1  |
| 1  |   |    |   |    |    |
|    | 1 | 1  | 1 | 1  | 1  |
|    |   |    |   |    |    |
| 3  | 2 | 3  |   |    |    |
| 1  | 1 | 1  |   |    |    |
| 1  |   |    |   |    |    |
| 2  | 1 | 2  |   |    |    |
|    |   |    | 1 | 1  |    |
| 1  |   |    | 1 | 5  | 1  |
| 4  | 1 | 2  | 1 | 4  | 1  |
| 8  | 1 | 7  | 2 | 3  | 2  |
|    |   |    |   |    | 1  |

|    |   |    |   |   |   |   |
|----|---|----|---|---|---|---|
|    | 1 | 1  | 1 | 1 | 1 | 1 |
| 11 | 5 | 11 | 2 | 5 | 5 |   |
| 2  | 1 | 3  | 1 | 4 | 1 |   |
|    |   |    | 1 | 1 | 1 |   |
| 1  | 1 | 1  | 1 | 3 | 1 |   |
| 4  | 1 | 1  | 5 | 7 | 4 |   |
| 2  | 1 | 1  | 2 | 2 | 1 |   |
| 3  | 1 | 4  | 1 | 4 | 1 |   |
|    | 1 | 1  |   |   |   |   |
| 12 | 6 | 12 | 5 | 8 | 5 |   |
|    | 2 | 3  | 6 | 6 | 4 |   |
| 4  | 1 | 3  | 1 | 3 | 1 |   |
|    |   |    |   |   |   |   |
| 1  | 1 | 3  |   |   | 1 |   |
|    |   |    |   |   |   |   |
| 1  |   |    |   |   |   |   |
| 2  |   |    |   |   |   |   |
|    |   |    |   |   | 1 |   |
| 2  | 1 | 4  | 1 | 3 | 1 |   |
| 2  |   |    | 1 | 1 | 1 |   |
| 1  |   |    | 1 | 1 | 1 |   |
| 1  |   |    | 1 | 1 | 2 |   |
| 2  |   |    |   |   | 1 |   |
| 4  | 1 | 4  |   |   |   |   |
| 4  | 1 | 4  | 2 | 5 | 2 |   |
|    |   |    | 1 | 2 | 1 |   |
| 7  | 1 | 5  | 1 | 3 | 1 |   |
| 1  |   |    |   |   |   |   |
| 1  | 1 | 1  |   |   | 1 |   |
|    |   |    | 1 | 1 | 1 |   |
|    |   |    |   |   |   |   |
| 1  |   |    |   |   |   |   |
| 3  | 1 | 4  | 1 | 4 | 1 |   |
| 1  |   |    |   |   |   |   |
| 4  | 1 | 4  | 1 | 1 |   |   |
| 4  | 1 | 4  |   |   |   |   |
|    | 1 | 1  |   |   |   |   |
| 2  | 1 | 2  |   |   |   |   |
|    | 1 | 1  | 1 | 2 | 1 |   |
|    | 1 | 1  |   |   |   |   |
| 1  |   |    |   |   |   |   |
| 2  |   |    | 1 | 1 | 1 |   |
| 2  | 1 | 1  |   |   |   |   |
| 3  | 1 | 1  | 1 | 4 | 1 |   |
|    |   |    |   |   |   |   |
|    |   |    |   |   |   |   |
| 2  |   |    | 1 | 1 | 1 |   |
|    |   |    |   |   |   |   |
| 1  | 1 | 1  | 1 | 2 | 2 |   |
| 1  |   |    |   |   |   |   |
|    |   |    | 1 | 1 | 1 |   |
|    | 1 | 1  |   |   |   |   |
| 4  | 2 | 3  |   |   | 1 |   |
|    |   |    |   |   |   |   |
|    | 1 | 1  |   |   |   |   |
| 3  | 1 | 1  |   |   |   |   |
| 3  | 2 | 3  |   |   |   |   |

|   |   |   |   |   |   |
|---|---|---|---|---|---|
| 1 | 1 | 1 |   |   | 1 |
| 4 | 1 | 1 | 1 | 1 | 1 |
| 3 | 2 | 3 |   |   | 1 |
| 1 |   |   | 1 | 2 | 1 |
| 2 | 1 | 1 |   |   |   |
|   |   |   | 1 | 2 | 1 |
|   | 1 | 1 |   |   | 1 |
| 1 |   |   |   |   |   |
| 4 | 2 | 5 | 1 | 3 | 1 |
| 1 | 1 | 1 |   |   | 1 |
| 2 | 1 | 1 |   |   | 2 |
| 1 | 1 | 1 |   |   |   |
| 1 |   |   | 1 | 1 |   |
| 1 | 1 | 1 |   |   | 1 |
| 1 | 1 | 1 |   |   |   |
| 2 |   |   |   |   |   |
|   | 1 | 1 |   |   |   |
| 2 |   |   | 1 | 4 | 1 |
| 1 |   |   |   |   |   |
|   |   |   | 1 | 1 | 1 |
| 1 |   |   |   |   | 1 |
|   | 1 | 2 | 2 | 2 |   |
|   |   |   |   |   | 1 |
|   | 1 | 1 |   |   |   |
|   |   |   | 1 | 1 | 1 |
| 1 | 1 | 1 | 1 | 1 |   |
| 1 |   |   |   |   | 1 |
|   | 1 | 1 |   |   |   |
| 1 |   |   |   |   | 2 |
| 1 |   |   | 1 | 2 | 1 |
| 1 |   |   | 1 | 1 |   |
|   | 1 | 1 |   |   |   |
| 1 | 1 | 1 |   |   |   |
| 1 | 1 | 1 |   |   |   |
| 1 | 1 | 2 |   |   |   |
| 1 | 1 | 1 | 3 | 4 | 1 |
| 1 |   |   |   |   |   |
| 1 |   |   | 1 | 1 | 1 |
| 3 | 1 | 2 |   |   |   |
|   | 1 | 2 | 1 | 1 |   |
| 1 |   |   |   |   |   |
| 1 | 1 | 1 | 1 | 4 | 1 |
| 1 |   |   |   |   |   |
| 1 | 1 | 2 |   |   |   |
| 1 |   |   |   |   |   |
| 1 | 1 | 1 |   |   |   |
| 2 | 1 | 3 |   |   |   |



| UNNNNNNNNNUUUNNNNNNNNU |               |          |               |          |
|------------------------|---------------|----------|---------------|----------|
| Rep 2                  | Rep 1         |          | Rep 2         |          |
| # PSM J2               | # Peptides K2 | # PSM K2 | # Peptides L2 | # PSM L2 |
| 194                    | 21            | 89       | 21            | 102      |
| 3                      | 16            | 37       | 19            | 41       |
| 48                     | 13            | 57       | 11            | 44       |
| 42                     | 16            | 58       | 14            | 62       |
| 18                     | 14            | 32       | 11            | 27       |
| 40                     | 13            | 44       | 13            | 38       |
| 19                     | 7             | 19       | 5             | 8        |
| 50                     | 13            | 51       | 12            | 51       |
| 18                     | 4             | 4        | 3             | 5        |
| 16                     | 5             | 12       | 5             | 11       |
| 13                     | 7             | 13       | 7             | 15       |
| 10                     | 3             | 3        | 1             | 1        |
| 19                     | 6             | 16       | 6             | 13       |
| 55                     | 12            | 39       | 11            | 42       |
| 35                     | 2             | 4        | 1             | 1        |
| 81                     | 8             | 37       | 9             | 36       |
| 1                      | 1             | 1        | 1             | 1        |
| 2                      | 1             | 1        | 1             | 1        |
| 1                      | 2             | 3        | 3             | 5        |
| 2                      | 1             | 2        | 1             | 2        |
| 11                     | 3             | 9        | 6             | 11       |
| 6                      | 5             | 15       | 7             | 14       |
| 5                      | 5             | 9        | 3             | 6        |
| 7                      | 6             | 10       | 4             | 10       |
| 7                      | 5             | 12       | 5             | 10       |
| 4                      | 7             | 12       | 6             | 12       |
|                        | 4             | 5        | 3             | 4        |
| 6                      | 4             | 11       | 4             | 9        |
| 6                      | 6             | 10       | 5             | 8        |
| 9                      | 3             | 9        | 3             | 6        |
|                        | 5             | 14       | 6             | 19       |
| 52                     | 8             | 34       | 9             | 30       |
| 2                      | 4             | 11       | 5             | 12       |
| 34                     | 12            | 34       | 8             | 35       |
| 4                      | 4             | 12       | 4             | 16       |
| 33                     | 6             | 24       | 6             | 19       |
| 2                      | 1             | 1        |               |          |
| 8                      | 4             | 8        | 3             | 8        |
|                        | 3             | 3        | 2             | 3        |
|                        | 3             | 4        | 2             | 2        |
| 38                     | 6             | 26       | 8             | 24       |
| 1                      | 4             | 12       | 4             | 12       |
| 3                      | 2             | 2        |               |          |
| 1                      | 1             | 1        | 2             | 2        |
| 18                     | 5             | 17       | 6             | 17       |
| 5                      | 2             | 5        | 1             | 4        |
| 5                      | 3             | 4        | 2             | 3        |
|                        | 3             | 5        | 1             | 1        |
| 6                      | 1             | 1        | 1             | 1        |
|                        |               |          | 1             | 1        |
|                        | 1             | 1        | 1             | 1        |
|                        |               |          | 1             | 1        |
|                        | 1             | 2        | 1             | 1        |

|    |    |    |   |    |
|----|----|----|---|----|
|    | 1  | 1  | 1 | 1  |
| 13 | 3  | 9  | 5 | 16 |
| 36 | 7  | 18 | 5 | 14 |
| 1  | 2  | 2  | 3 | 3  |
| 5  | 1  | 1  | 1 | 2  |
| 27 | 11 | 30 | 5 | 25 |
| 9  | 7  | 11 | 8 | 16 |
| 8  |    |    | 1 | 1  |
| 3  | 2  | 4  | 2 | 5  |
|    | 1  | 1  | 3 | 3  |
| 3  | 2  | 2  | 2 | 2  |
|    | 3  | 6  | 5 | 9  |
| 3  | 2  | 3  |   |    |
|    | 3  | 6  | 2 | 4  |
| 2  |    |    | 1 | 1  |
| 1  | 2  | 2  | 1 | 1  |
|    |    |    | 2 | 2  |
| 4  | 2  | 3  | 2 | 4  |
| 4  |    |    | 1 | 1  |
|    | 3  | 6  | 3 | 6  |
| 1  |    |    |   |    |
|    |    |    |   |    |
|    | 1  | 1  |   |    |
|    | 1  | 1  | 2 | 2  |
| 2  |    |    |   |    |
| 7  | 2  | 3  | 2 | 2  |
| 2  | 1  | 2  | 2 | 2  |
|    |    |    |   |    |
| 2  | 1  | 1  | 1 | 2  |
| 5  | 3  | 4  | 2 | 2  |
|    | 2  | 4  | 3 | 6  |
|    | 1  | 1  |   |    |
| 7  | 1  | 2  | 1 | 3  |
| 1  | 2  | 2  | 1 | 1  |
| 33 | 7  | 21 | 6 | 15 |
| 2  | 2  | 2  | 2 | 2  |
| 5  |    |    | 1 | 1  |
|    |    |    |   |    |
| 1  | 1  | 2  | 1 | 1  |
|    | 4  | 7  | 2 | 4  |
|    | 2  | 7  | 2 | 6  |
| 1  | 2  | 3  | 1 | 2  |
|    |    |    |   |    |
| 1  |    |    | 1 | 1  |
|    |    |    | 1 | 1  |
| 1  | 2  | 2  |   |    |
|    | 1  | 1  | 2 | 5  |
|    | 1  | 1  | 1 | 4  |
|    |    |    |   |    |
|    |    |    | 1 | 1  |
|    | 1  | 1  | 1 | 2  |
|    | 1  | 1  |   |    |
| 3  | 1  | 2  | 1 | 1  |
| 4  | 1  | 3  | 1 | 3  |
| 4  | 1  | 8  | 1 | 6  |
| 3  | 1  | 1  |   |    |

|    |   |    |   |    |
|----|---|----|---|----|
| 2  | 1 | 2  | 1 | 1  |
| 11 | 4 | 9  | 5 | 11 |
| 3  | 1 | 4  | 1 | 2  |
| 2  |   |    |   |    |
| 2  | 1 | 1  | 1 | 1  |
| 7  | 2 | 3  | 2 | 2  |
| 1  | 2 | 6  | 2 | 4  |
| 3  | 1 | 1  | 1 | 1  |
|    | 1 | 1  | 1 | 1  |
| 9  | 8 | 13 | 6 | 13 |
| 10 | 1 | 1  |   |    |
| 1  | 1 | 3  | 1 | 3  |
|    |   |    |   |    |
| 2  | 1 | 2  | 1 | 1  |
|    |   |    |   |    |
|    | 1 | 2  | 1 | 1  |
| 1  |   |    |   |    |
| 1  | 1 | 2  | 2 | 4  |
| 2  | 1 | 4  | 1 | 2  |
| 10 | 1 | 4  |   |    |
| 2  | 1 | 2  |   |    |
| 1  |   |    |   |    |
|    |   |    | 2 | 2  |
| 5  | 1 | 3  | 1 | 2  |
| 4  | 1 | 2  |   |    |
| 4  | 1 | 7  | 1 | 6  |
|    |   |    | 1 | 1  |
| 2  | 1 | 1  |   |    |
| 1  |   |    |   |    |
|    | 1 | 1  |   |    |
| 2  | 1 | 3  | 1 | 1  |
|    |   |    |   |    |
|    | 1 | 3  | 1 | 4  |
|    | 1 | 3  | 1 | 3  |
|    |   |    |   |    |
|    | 1 | 3  | 1 | 1  |
| 2  | 1 | 1  | 1 | 2  |
|    |   |    |   |    |
|    | 1 | 1  | 1 | 1  |
| 1  |   |    |   |    |
|    |   |    | 1 | 1  |
| 4  | 1 | 2  | 2 | 4  |
|    |   |    |   |    |
|    |   |    | 1 | 1  |
| 1  | 1 | 3  | 1 | 3  |
|    | 1 | 1  | 1 | 2  |
| 3  | 1 | 1  |   |    |
|    |   |    | 1 | 1  |
| 1  | 1 | 1  |   |    |
|    |   |    |   |    |
| 2  | 1 | 2  | 1 | 1  |
|    |   |    |   |    |
|    |   |    | 1 | 1  |
|    |   |    | 1 | 2  |
|    | 2 | 3  | 1 | 2  |

|   |   |  |   |   |   |
|---|---|--|---|---|---|
| 1 |   |  |   |   |   |
| 1 | 1 |  | 2 | 1 | 2 |
| 1 | 1 |  | 1 |   |   |
| 2 | 1 |  | 1 | 1 | 2 |
|   |   |  |   | 1 | 1 |
| 2 |   |  |   | 2 | 2 |
| 2 | 1 |  | 1 |   |   |
|   |   |  |   |   |   |
|   |   |  |   | 1 | 1 |
| 1 | 1 |  | 3 | 1 | 4 |
|   |   |  |   |   |   |
| 1 | 1 |  | 2 | 1 | 1 |
|   |   |  |   |   |   |
| 2 |   |  |   |   |   |
|   |   |  |   |   |   |
|   |   |  |   | 1 | 1 |
|   | 1 |  | 2 | 1 | 1 |
| 1 |   |  |   | 2 | 2 |
|   |   |  |   |   |   |
|   | 1 |  | 1 |   |   |
|   | 1 |  | 1 |   |   |
| 1 |   |  |   |   |   |
|   |   |  |   |   |   |
| 1 |   |  |   |   |   |
|   |   |  |   |   |   |
| 1 |   |  |   | 1 | 1 |
|   |   |  |   |   |   |
|   |   |  |   |   |   |
|   |   |  |   | 1 | 1 |
| 1 | 1 |  | 1 | 1 | 1 |
|   | 1 |  | 1 |   |   |
|   |   |  |   |   |   |
|   | 1 |  | 1 | 1 | 2 |
| 1 |   |  |   | 1 | 1 |
|   |   |  |   |   |   |
| 2 | 1 |  | 1 | 2 | 2 |
| 1 | 1 |  | 1 | 1 | 1 |
|   | 2 |  | 2 |   |   |
|   | 1 |  | 2 |   |   |
|   | 1 |  | 1 |   |   |
|   | 1 |  | 1 |   |   |
|   | 1 |  | 1 |   |   |
| 1 |   |  |   |   |   |
|   |   |  |   |   |   |
| 1 |   |  |   |   |   |
|   |   |  |   | 1 | 1 |
| 1 |   |  |   |   |   |
|   | 1 |  | 1 | 1 | 1 |
|   | 1 |  | 1 |   |   |
|   |   |  |   |   |   |
|   |   |  |   |   |   |
|   |   |  |   | 1 | 1 |
